# Supplementary material for: Democratization, leader education and growth: firm-level evidence from Indonesia
Source: Springer Nature journal article supplement (doi:10.1007/s10887-022-09221-5), 2023-02-15

# DAYA TARIK INVESTASI KABUPATEN/KOTA DI INDONESIA, 2004

Persepsi Dunia Usaha

*Regional Investment Attractiveness Business Perception*

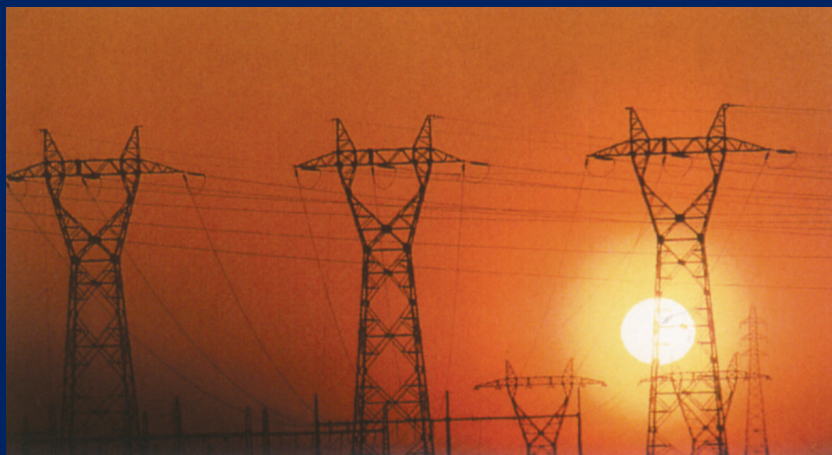

Peringkat 214 Kabupaten/Kota di Indonesia & Gambaran  
Permasalahan Dunia Usaha

*Rating to 214 Regencies/Cities in Indonesia & Problems on Business  
Environment*

## **Komite Pemantauan Pelaksanaan Otonomi Daerah** *The Regional Autonomy Watch*

**Komite Pemantauan Pelaksanaan Otonomi Daerah**, disingkat **KPPOD** adalah lembaga independen yang melakukan pemantauan pelaksanaan otonomi daerah terkait aktivitas perekonomian. Secara resmi KPPOD didirikan tanggal 1 Maret 2001 oleh tiga unsur lembaga: dunia usaha, lembaga penelitian, dan media masa, yang terdiri dari 7 (tujuh) institusi yaitu **KADIN-Indonesia**, **CSIS** (Centre For Strategic And International Studies), **LPEM-FEUI** (Lembaga Penyelidikan Ekonomi Masyarakat – Fakultas Ekonomi Universitas Indonesia), **Sekolah Tinggi Manajemen Prasetiya Mulya**, **Harian The Jakarta Post**, **Harian Bisnis Indonesia** dan **Harian Suara Pembaruan**.

Pembentukan KPPOD tersebut merupakan respon terhadap suatu eksperimen besar bangsa Indonesia dalam menyelenggarakan otonomi daerah sejak tanggal 1 Januari 2001 berdasarkan Undang Undang No. 22 Tahun 1999 tentang “Pemerintahan Daerah” dan Undang Undang No. 25 Tahun 1999 tentang “Perimbangan Keuangan antara Pemerintah Pusat dan Daerah”.

Dalam pandangan unsur unsur pendiri KPPOD, tujuan paling mendasar dari penyelenggaraan otonomi daerah tersebut adalah untuk mewujudkan keadilan dan kemakmuran rakyat di setiap daerah otonom. Untuk itu, melalui kegiatan kegiatannya, KPPOD berusaha ikut serta membangun ekonomi rakyat dengan mendorong terciptanya iklim dunia usaha yang kondusif. Tujuan tersebut dicapai dengan melakukan penilaian kritis terhadap kebijakan dan praktek pemerintahan pusat dan daerah yang mengancam perekonomian nasional.

Sejak pendiriannya, sampai saat ini KPPOD telah melakukan berbagai jenis kegiatan dalam bentuk:

1. Kajian ribuan Peraturan Daerah mengenai aktivitas perekonomian, khususnya Pajak dan Retribusi Daerah, dengan memberikan rekomendasi untuk perbaikan kualitasnya kepada pemerintah daerah dan pemerintah pusat.
2. Pemeringkatan tahunan Daya Tarik Investasi Kabupaten/Kota di Indonesia untuk menciptakan iklim kompetisi yang sehat antar daerah, sejak tahun 2001; dan pemberian KPPOD *Award* kepada daerah daerah peringkat terbaik sejak tahun 2002.
3. Sosialisasi hasil hasil kegiatan KPPOD mengenai topik topik aktual pelaksanaan otonomi daerah melalui: *Newsletter* KPPOD yang terbit dua bulan sekali sejak Juni 2001, yang disebarluaskan ke pemerintah Kabupaten/Kota/Propinsi seluruh Indonesia dan berbagai *stakeholder* pembangunan daerah lainnya; seminar/lokakarya mengenai pelaksanaan otonomi daerah di berbagai daerah di Indonesia; *talk show* TV/Radio, Dll.

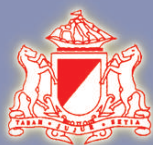

**KADIN INDONESIA**

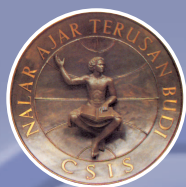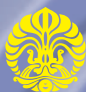

**LPEM - FEUI**

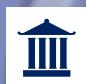

**PRASETIYA MULYA**  
*business school*

**The Jakarta Post**

**Bisnis Indonesia**

**SUARA PEMBARUAN**

# DAYA TARIK INVESTASI KABUPATEN/KOTA DI INDONESIA, 2004

Persepsi Dunia Usaha

*Regional Investment Attractiveness Business Perception*

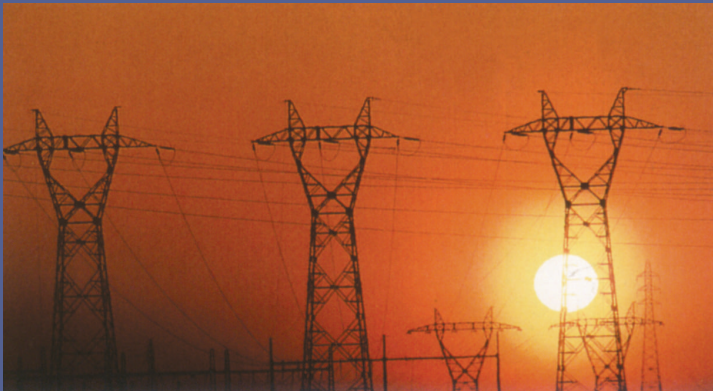

Peringkat 214 Kabupaten/Kota di Indonesia & Gambaran  
Permasalahan Dunia Usaha

*Rating to 214 Regencies/Cities in Indonesia & Problems on Business  
Environment*

---

# Tim Peneliti

## *Research Team*

### **Koordinator Peneliti/*Principal Investigator:***

P. Agung Pambudhi, MM

### **Nara Sumber/*Resource Persons:***

Dr. Bambang P.S. Brodjonegoro

Dr. Hadi Soesastro

Dr. Djisman Simanjuntak

### **Anggota Peneliti/*Research Associates:***

Sigit Murwito, S.Sos

Robert EndiJaweng S.IP

Sri Mulyono, MSs

Agus Widodo, S.Sos

### **Peneliti Lapangan/*Area Researchers:***

Aan Eko Widiarto, SH, Mhum.; Agustinus Lumen; Bramuda Mahardhika SH.; Dr. Arifin Bakti;

Dr. Grevo Gerung; Dr. Rafael Purtomo Somaji; Drs. H. Bernard, M.Si.; Eddy Ratno Susanto ST.;

Hendri Benyamin SE.; Herman Buedoyo, SE.; Idham Cholid,ME.; Ir. Jumli, M.Sc.;

J. Septer Manufandu; Laode Azadi M.Si.; Murbanto Sinaga, MA.; Nanang Farid Syam, S.Sos.;

Nursia Sinaga, S.Sos.; Paulina P. Mada.; Prihartini Budi Astuti, SE.; Ruslan Sangadji;

Sukasmento, MSi.; Taufik Hidayat SP.; Taufiqurrahman, SE, MSc.; Teguh Hadi Priyono, SE, Msi.;

Unang Atmaja, MSc.; Y. Wasi Gede Puraka, S.Sos.; Yosef Prihanto, SE.; Yuliana Nona Sangbidang;

Yusep Hendarsyah, S.IP.; Yustinus Vena Handono; Zainal Abidin, MM.; Zet Ena, SE

### **Asisten Peneliti/*Research Assistants:***

Regina Retno Budiastuti, SH

F. Sundoko

Kurniawaty Septiany Musdar



---

# Kata Pengantar - KPPOD

## *Foreword*

Empat tahun perjalanan otonomi daerah (otda) ditandai dengan berbagai peristiwa penting, positif maupun negatif, yang dapat digunakan sebagai acuan evaluasi guna perbaikan pelaksanaan otda. Dari segi positif, terlihat adanya *political will* beberapa daerah untuk melibatkan masyarakat dalam perencanaan pembangunan daerah, juga muncul upaya perbaikan pelayanan publik (usaha) dengan menerapkan sistem pelayanan satu atap/terpadu. Sayangnya sisi negatif otonomi daerah justru lebih mendominasi, diantaranya tentang perebutan kewenangan antar daerah-daerah otonom dengan pemerintah pusat, hubungan tidak harmonis antara Kabupaten/Kota dengan Propinsi, politik uang dalam pemilihan kepala daerah, pertentangan eksekutif dan legislatif, arogansi pimpinan daerah, pemekaran wilayah yang sangat pesat dan kontroversial, kebijakan daerah yang mendorong ekonomi biaya tinggi, dan berbagai peristiwa lainnya.

KPPOD (Komite Pemantauan Pelaksanaan Otonomi Daerah) yang hadir sepanjang usia otda tersebut, berusaha mewujudkan visinya untuk ikut serta menciptakan iklim usaha yang kondusif di era otonomi ini melalui berbagai kegiatan yang dilakukannya. Dalam salah satu kegiatan tahunannya, KPPOD mengadakan penelitian mengenai “Pemeringkatan Daya Tarik Investasi

*The four-year journey of regional autonomy (otda) is characterized by a range of important events, negative or positive, which can be used as reference for evaluation for its better implementation. From positive aspect, we can see the growing political will in some regions involving the public in planning the development of their areas, likewise the manifestations of efforts intended for improvement of public service (business) by applying one-stop-service in business licensing process. Unfortunately, the negative aspects of regional autonomy are indeed more dominant, such as, among others, competition over authority between autonomous regions and central government, inharmonious relationship between Regency/City and Province, money politics in the election of heads of regions, conflict between the executive and legislative, arrogance of regional leaders, speedy and controversial expansion of territory, regional policy pushing high-cost economy, and other numerous upshots.*

*KPPOD (Komite Pemantauan Pelaksanaan Otonomi Daerah/Regional Autonomy Watch), which is existing all along with the age of otda, is seeking to realize its vision of partaking in the creation of conducive business climate in the era of autonomy through various activities. As one of its annual activity, KPPOD conducted a “Rating on Investment*

Kabupaten/Kota Tahun 2004” yang meliputi 161 Kabupaten dan 53 Kota di Indonesia. Kegiatan tersebut merupakan pemeringkatan keempat, setelah sebelumnya melaksanakannya di 90 Kabupaten/Kota di tahun 2001, 134 Kabupaten/Kota di tahun 2002, dan 200 Kabupaten/Kota di tahun 2003.

Selain untuk referensi para pelaku usaha dalam mempertimbangkan keputusan investasinya, kegiatan tersebut juga dimaksudkan untuk mendorong kompetisi yang sehat antar daerah-daerah otonom dalam memfasilitasi aktivitas perekonomian. Antusiasme kalangan dunia usaha untuk mempelajari hasil penelitian tersebut di tahun-tahun sebelumnya dan beragam tanggapan dari daerah-daerah otonom, serta liputan media yang luas semakin mendorong KPPOD untuk melakukan kegiatan tersebut secara reguler. Dari kegiatan itu diharapkan menjadi salah satu alat bantu bagi pihak-pihak yang berkepentingan untuk melakukan evaluasi terhadap pelaksanaan otoda yang sedang dan akan terus berlangsung.

Dalam penelitian di tahun 2004 ini, kriteria yang digunakan untuk menilai daya tarik investasi daerah dipertahankan sama dengan kriteria yang digunakan tahun 2002 yang terdiri dari 5 faktor, 14 variabel dan 42 indikator; demikian juga dengan bobot masing-masing kriteria. Hal itu dimaksudkan untuk dapat melihat perkembangan daya tarik investasi daerah dari tahun ke tahun.

Pelaksanaan studi tersebut yang dilaksanakan oleh tim peneliti tetap KPPOD juga didukung sejumlah nara sumber dan para koordinator peneliti daerah dari berbagai institusi penelitian dan perguruan tinggi, serta para *Interviewer* di masing-masing daerah penelitian. Meskipun berbagai upaya telah dilakukan untuk meningkatkan kualitas hasil studi (evaluasi internal maupun adopsi dari berbagai kritik dan saran pada pemeringkatan tahun sebelumnya), kelemahan-kelemahan masih sangat mungkin terjadi. Oleh karena itu kami akan sangat berterimakasih apabila ada masukan dari para pembaca untuk tujuan perbaikan kualitas studi, dan terutama agar hasil pemeringkatan yang disosialisasikan secara luas dapat memberi kontribusi positif bagi masyarakat.

*Attractiveness of Regencies/Cities for Year 2004” covering 161 Regencies and 53 Cities in Indonesia. The study is the fourth rating; the first was in 2001 covering 90 Regencies/Cities, the second was in 2002 with 134 Regencies/Cities, while the third was in 2003 with 200 Regencies/Cities.*

*Apart from being a reference for business players in weighing investment decision, said activity is intended to induce healthy competition among autonomous regions in facilitating economic activities. Likewise, the activity is expected to become one of the means to assist principal parties to evaluate the otoda, the program that is on-going and will continue to go on.*

*The enthusiasm of the business community to study the result of research in previous years and a mixture of comments from autonomous regions, as well as wide media coverage drive KPPOD to do the same activity regularly.*

*In this year’s research, the criteria used to assess the investment attractiveness of regions is same to the criteria used in year 2002 and 2003 consisting of 5 factors, 14 variables and 42 indicators; the same applies to the weight of each criterion. This is on purpose to see the development in the attractiveness to investment of regions from year to year.*

*This study, which is conducted by the same research team from KPPOD, is supported by a number of resource persons, area researchers/coordinators from various research institutions and research academe, as well as interviewers from each research area. Even though various efforts have been done to increase the quality of the result of this study (internal evaluation and adaptation of various suggestions and critics over the rating of previous years), weaknesses are still inevitable. Accordingly, we appreciate it very much if there are inputs from our readers to enhance the quality of this study, and if there are efforts to widely disseminate this study as positive contribution to the society.*

Kami mengucapkan terimakasih banyak kepada para responden pelaku usaha yang memberikan input utama dalam penelitian ini, pemerintah daerah di daerah penelitian yang telah memberikan data-data pendukung yang diperlukan, begitu juga kepada Departemen Dalam Negeri cq. Dirjen Otonomi Daerah, dan kepada The Asia Foundation yang secara konsisten mendukung kegiatan tahunan KPPOD ini.

*We express our deep gratitude to our respondents from the business society who provided us first-hand input, to local governments that shared us supporting data, to the Ministry of Home Affairs especially the Directorate General for Regional Autonomy, and to The Asia Foundation that consistently supported this rating.*

Atas Nama Tim Peneliti/*On behalf of the Research Team*  
Koordinator/*Principal Investigator*

**P. Agung Pambudhi**

---

# Kata Pengantar - Asia Foundation

## *Foreword*

Otonomi daerah adalah reformasi pemerintahan yang mempunyai dampak ekonomi. Dengan adanya delegasi wewenang kepada pemerintah daerah, maka pengusaha akan lebih banyak berhubungan langsung dengan pemerintah daerah, bukan lagi dengan pemerintah pusat. Perubahan ini terjadi dengan berbagai masalah, seperti adanya peningkatan jumlah dan besarnya pungutan, berbagai kasus korupsi, dan munculnya peraturan daerah yang menghambat dunia usaha.

Pada saat bersamaan, desentralisasi juga membuka banyak kesempatan emas bagi pemerintah daerah. Pendelegasian pemerintahan membuka peluang bagi pemerintah daerah meningkatkan kemakmuran masyarakat melalui inovasi, peningkatan transparansi dan akuntabilitas, serta pembangunan ekonomi daerah untuk penciptaan lapangan kerja. Banyak contoh terbaik yang telah dilakukan pemerintah daerah. Misalnya, kabupaten Sidoarjo di Jawa Timur yang telah berhasil menurunkan biaya perijinan hingga 30 persen dan mengurangi lama waktu pengurusan sampai 40 persen. Pemerintah Yogyakarta membuat sistem penyampaian keluhan melalui berbagai media

*Regional autonomy was undertaken as a governance reform, with economic impact given secondary consideration. But the significant rights and responsibilities devolved to local governments means that most businesses now deal almost entirely with the local, not central, government. This process has not gone without hiccups—proliferation of levies and user fees, cases of wide-scale corruption, and poor policy choices are all real problems that must be addressed.*

*However, decentralization is also an important opportunity. Devolving governance to communities creates new possibilities to increase the well-being of citizens by fostering innovation, increasing transparency and accountability, and developing regional economies that generate employment outside of Jakarta. There are many examples now of best practice by local governments. Take for example Sidoarjo, East Java that has reduced the cost of business licensing by 30% and processing time by 40%. Local governments like Yogyakarta that have created online complaint mechanisms to improve their local services. Or Sragen in Central Java, that was able to increase local revenue by over 400% in three years, without raising fees or taxes,*

komunikasi seperti sms, telepon, email, dan internet untuk mendapat masukan guna memperbaiki pelayanan publik. Sedangkan kabupaten Sragen dapat meningkatkan Pendapatan Asli Daerah sampai 400 persen dalam tiga tahun dengan komitmen membasmi korupsi dan tanpa menaikkan pungutan atau pajak daerah.

Studi pemeringkatan daya tarik investasi ini merupakan upaya mengidentifikasi contoh terbaik yang ada dan menyebarkannya sehingga pemerintah daerah lain dapat melakukan hal yang sama. Pemeringkatan ini diharapkan menjadi pendorong bagi pemerintah daerah untuk dapat berbuat lebih baik lagi dan menyediakan suatu tolok ukur untuk upaya tersebut. Dengan adanya pemilihan langsung kepala daerah (gubernur, bupati, atau walikota) di masa mendatang, pemerintah daerah akan langsung dievaluasi hasil kerja nyatanya dalam membangun ekonomi daerah oleh para pemilih. Kami berharap survei ini akan memotivasi pemerintah daerah untuk memperbaiki kinerja mereka dan meningkatkan pemahaman bagaimana pengusaha menilai suatu daerah sebagai tempat berinvestasi.

Asia Foundation sangat bangga bisa berpartisipasi dalam kegiatan pemeringkatan tahunan ini, yang mendapat dukungan penuh dari *United States Agency for International Development* (USAID). Kegiatan pemeringkatan ini merupakan bagian dari upaya Asia Foundation untuk mendukung perbaikan iklim usaha di Indonesia. Sejak tahun 1996, Asia Foundation telah bekerjasama dengan pengusaha dan pemerintah daerah untuk mengurangi hambatan perdagangan dan investasi. Beberapa program yang Asia Foundation laksanakan diantaranya: peningkatan kualitas layanan perijinan usaha, memfasilitasi pembuatan peraturan dengan partisipasi masyarakat, dan mendukung asosiasi usaha kecil dan menengah untuk melakukan advokasi kebijakan usaha yang lebih baik. Survei

*through their commitment to end corruption.*

*This ranking allows us to identify and disseminate this best practice in the hopes that other local governments will take up the challenge. The ranking is intended to urge local governments to strive to do better and to give them concrete benchmarks for doing better. With direct elections of Governors, Mayors, and Regents fast approaching, local governments will soon be judged in a very concrete way on their economic performance. We hope that the survey results will motivate local governments to improve their performance and to better understand how local investors view their areas as investment sites.*

*The Asia Foundation is proud to support this annual ranking, with generous support from the United States Agency for International Development. The ranking is part of our broader efforts to improve the business environment in Indonesia. Since 1996, we have worked with business owners and local governments across the country to reduce barriers to trade and investment. Our programs streamline business licensing, facilitate the drafting of economic regulation in a participatory and impact-conscious way, and support small business associations to advocate for better economic policies. This survey informs much of our work and we hope that it is as useful to the reader as well, as we work together to make Indonesia an investor-friendly, prosperous country.*

KPPOD ini memberikan informasi mengenai berbagai upaya untuk memperbaiki iklim usaha dan kami berharap survei ini akan bermanfaat bagi kita semua dalam upaya menjadikan Indonesia sebagai negara yang menarik bagi investor dan meningkatkan kemakmuran.

**Douglas E. Ramage**

Representative to Indonesia  
The Asia Foundation  
Jakarta

**Erin Thébault Weiser**

Director for Economic Programs  
The Asia Foundation  
Jakarta

March 2005



# Daftar Isi

## *Table of Contents*

|      |                                                                                              |
|------|----------------------------------------------------------------------------------------------|
| i    | JUDUL PENELITIAN/ <i>Title</i>                                                               |
| iii  | TIM PENELITI/ <i>Research Team</i>                                                           |
| v    | KATA PENGANTAR - KPPOD/ <i>Foreword</i>                                                      |
| ix   | KATA PENGANTAR - ASIA FOUNDATION/ <i>Foreword</i>                                            |
| xiii | DAFTAR ISI/ <i>Table of Contents</i>                                                         |
| xv   | DAFTAR GAMBAR/ <i>List of Diagram</i>                                                        |
| xvi  | DAFTAR TABEL/ <i>List of Table</i>                                                           |
| xvii | DAFTAR LAMPIRAN/ <i>List of Appendix</i>                                                     |
| 1    | BAB I. PENDAHULUAN/ <i>Introduction</i>                                                      |
| 1    | A. LATAR BELAKANG/ <i>Background</i>                                                         |
| 4    | B. TUJUAN PENELITIAN/ <i>Purpose of Study</i>                                                |
| 4    | C. SIGNIFIKANSI PENELITIAN/ <i>Significance of Study</i>                                     |
| 5    | BAB II. KERANGKA PEMIKIRAN/ <i>Analitical Framework</i>                                      |
| 13   | BAB III. METODOLOGI PENELITIAN/ <i>Research Methodology</i>                                  |
| 13   | A. RUANG LINGKUP PENELITIAN/ <i>Research Scope</i>                                           |
| 14   | B. DATA PENELITIAN/ <i>Research Data</i>                                                     |
| 14   | B.1. Jenis Data/ <i>Types of Data</i>                                                        |
| 14   | B.1.1. Data Primer/ <i>Primary Data</i>                                                      |
| 14   | B.1.2. Data Sekunder/ <i>Secondary Data</i>                                                  |
| 19   | B.2. Pengumpulan Data/ <i>Data Collection</i>                                                |
| 19   | B.2.1. Teknik Pengumpulan Data/ <i>Data Collection Method</i>                                |
| 21   | B.2.2. Profil Responden/ <i>Profile of Respondents</i>                                       |
| 22   | B.3. Pengolahan Data dan Analisis Data/ <i>Data Processing and Analysis</i>                  |
| 22   | B.3.1. Pembobotan Faktor, Variabel dan Indikator/ <i>Weighting of Factors, Variables and</i> |

|    |                                                                                                                                                                |
|----|----------------------------------------------------------------------------------------------------------------------------------------------------------------|
|    | <i>Indicators</i>                                                                                                                                              |
| 24 | B.3.2. Klasifikasi Intensitas Tiap Indikator/ <i>Classification of Intensity for Each Indicator</i>                                                            |
| 25 | B.3.3. Penentuan Nilai Intensitas Tiap Indikator dan Peringkat/ <i>Determination of Intensity Weight of Each Indicator and Rank</i>                            |
| 27 | <b>BAB IV. DAYA TARIK INVESTASI 214 KABUPATEN/KOTA DI INDONESIA TAHUN 2004/</b><br><i>Investment Attractiveness of 214 Regencies/Cities in Indonesia, 2004</i> |
| 27 | A. PERINGKAT 161 KABUPATEN DAN PERINGKAT 53 KOTA DI INDONESIA /<br><i>Rank of 161 Regencies and 53 Cities in Indonesia</i>                                     |
| 28 | A.1. Peringkat Berdasarkan Kriteria Umum/ <i>General Ranking</i>                                                                                               |
| 31 | A.2. Peringkat Berdasarkan Faktor Kelembagaan/ <i>The Institutional Ranking</i>                                                                                |
| 37 | A.3. Peringkat Berdasarkan Faktor Sosial Politik/ <i>The Socio-Political Ranking</i>                                                                           |
| 42 | A.4. Peringkat Berdasarkan Faktor Ekonomi Daerah/ <i>The Economic Dynamism Ranking</i>                                                                         |
| 46 | A.5. Peringkat Berdasarkan Faktor Tenaga Kerja & Produktivitas/ <i>The Labour and Productivity Ranking</i>                                                     |
| 49 | A.6. Peringkat Berdasarkan Faktor Infrastruktur Fisik/ <i>The Physical Infrastructure Ranking</i>                                                              |
| 53 | B. PERUBAHAN PENINGKATAN DAYA TARIK INVESTASI/ <i>Changes In Ranking</i>                                                                                       |
| 57 | <b>BAB VI. PENUTUP/<i>Conclusion</i></b>                                                                                                                       |
| 57 | A. KESIMPULAN/ <i>Conclusion</i>                                                                                                                               |
| 62 | B. SARAN/ <i>Recommendation</i>                                                                                                                                |
| 65 | <b>LAMPIRAN/<i>Appendix</i></b>                                                                                                                                |

# Daftar Gambar

## *List of Diagram*

- 6 Diagram 1 : Hirarki Faktor & Variabel Pemeringkatan/*Hierarchy of Rating Factors and Variables*
- 22 Diagram 2-6 : Bobot Faktor; Variabel; Indikator Pemeringkatan/*Weighting of Rating Factors, Variables and Indicators*
- 29 Grafik 1. : Statistik Kelompok Peringkat Berdasarkan Kategori Umum (Nilai Total)/*Ranking Based on the Overall Score*
- 32 Grafik 2. : Statistik Kelompok Peringkat Berdasarkan Faktor Kelembagaan/*Ranking Based on the Institutional Score*
- 35 Diagram 7 : Tingkat Kebermasalahan Perda/*Regional Regulation by Level of Problems Created*
- 35 Diagram 8 : Kualitas Perda Menurut Pelaku Usaha/*Quality of Regional Regulation According to Business Operators*
- 36 Diagram 9 : Jenis Pelanggaran Perda/*Type of Violions in Regional Regulation*
- 37 Diagram 10 : Perda Menurut Jenis Kebermasalahan/*Regional Regulation by Type of Problems*
- 39 Grafik 3. : Statistik Kelompok Peringkat Berdasarkan Faktor Sosial Politik/*Ranking Based on the Socio-Political Score*
- 43 Grafik 4. : Statistik Kelompok Peringkat Berdasarkan Faktor Ekonomi Daerah/*Ranking Based on the Regional Economic Dynamism Score*
- 47 Grafik 5. : Statistik Kelompok Peringkat Berdasarkan Faktor Tenaga Kerja dan Produktivitas/*Ranking Based on the Labour and Productivity Score*
- 50 Grafik 6. : Statistik Kelompok Peringkat Berdasarkan Faktor Infrastruktur Fisik/*Ranking Based on the Physical Infrastructure Score*

# Daftar Tabel

## *List of Table*

- 7    Tabel 1.        : Daftar Faktor - Variabel - Indikator Untuk Pemeringkatan Tahun 2004/*List of Factors - Variables - Indicators for 2004 Ratings*
- 14   Tabel 2.        : Daftar Data Jenis Data Dan Sumber Data Yang Digunakan Untuk Pemeringkatan Tahun 2004/*List of Types of Data and Sources of Data Use in the 2004 Ratings*
- 21   Tabel 3.        : Profil Responden/*Respondent Profile*
- 28   Tabel 4.a.        : Rata-Rata Skor Peringkat Umum/*Average Scores for General Ratings*
- 30   Tabel 4.b.        : Kelompok Peringkat A dan E Berdasarkan Kategori Umum/*Best and Worst - Overall*
- 32   Tabel 5.a.        : Rata-rata Skor Faktor Kelembagaan/*Average Scores for Institutional Factors*
- 34   Tabel 5.b.        : Kelompok Peringkat A dan E Berdasarkan Faktor Kelembagaan/*Best and Worst - the Institutional Factors*
- 38   Tabel 6.a.        : Rata-Rata Skor Faktor Sosial Politik/*Average Scores for Socio-Political Factors*
- 40   Tabel 6.b.        : Kelompok Peringkat A dan E Berdasarkan Faktor Sosial Politik/*Best and Worst - Socio-Political Factor*
- 43   Tabel 7.a.        : Rata-Rata Skor Peringkat Faktor Ekonomi/*Average Scores for Regional Economic Dynamism Factor*
- 44   Tabel 7.b.        : Kelompok Peringkat A dan E Berdasarkan Faktor Ekonomi Daerah/*Best and Worst - Regional Economic Dynamism*
- 46   Tabel 8.a.        : Rata-Rata Skor Faktor Tenaga Kerja & Produktivitas/*Average Scores for Labour & Productivity Factor*
- 48   Tabel 8.b.        : Kelompok Peringkat A Dan E Berdasarkan Faktor Tenaga Kerja & Produktivitas/*Best and Worst - Labour & Productivity*
- 50   Tabel 9.a.        : Rata-rata Skor Faktor Infrastruktut Fisik/*Average Scores for Physical Infrastructure Factor*

- 51 Tabel 9.b. : Kelompok Peringkat A dan E Berdasarkan Faktor Infrastruktur Fisik/*Best and Worst - Physical Infrastructure*
- 54 Tabel 10.a. : Statistik Perubahan Peringkat/*Statistics of Change in Rating*
- 54 Tabel 10.b. : Daerah yang Mengalami Peningkatan dari Peringkat C pada Tahun 2003 Menjadi Peringkat A pada Tahun 2004 Berdasarkan Kategori Umum/*Regions Experiencing Overall Improvement From Ranking C in 2003 to Ranking A in 2004*

# Daftar Lampiran

## *List of Appendix*

- 65 Lampiran 1 : Statistik Daerah Penelitian/*Statistic of Rating Area*
- 67 PERINGKAT DAERAH/*Rank of Region* :
- 67 Lampiran 2.1 : Peringkat 53 Kota Berdasarkan Kategori Umum/*Rank of 53 Cities Based on the General Score*
- 68 Lampiran 2.2 : Peringkat 161 Kabupaten Berdasarkan Kategori Umum/*Rank of 161 Regencies Based on the Overall Score*
- 70 Lampiran 3.1 : Peringkat 53 Kota Berdasarkan Faktor Kelembagaan/*Rank of 53 Cities Based on the Institutional Score*
- 71 Lampiran 3.2 : Peringkat 161 Kabupaten Berdasarkan Faktor Kelembagaan/*Rank of 161 Regencies Based on the Institutional Score*
- 73 Lampiran 4.1 : Peringkat 53 Kota Berdasarkan Faktor Sosial Politik/*Rank of 53 Cities Based on the Socio-Political Score*
- 74 Lampiran 4.2 : Peringkat 161 Kabupaten Berdasarkan Faktor Sosial Politik/*Rank of 161 Regencies Based on the Socio-Political Score*
- 76 Lampiran 5.1 : Peringkat 53 Kota Berdasarkan Faktor Ekonomi Daerah/*Rank of 53 Cities Based on the Economic Dynamism Score*
- 77 Lampiran 5.2 : Peringkat 161 Kabupaten Berdasarkan Faktor Ekonomi Daerah/*Rank of 161 Regencies Based on the Economic Dynamism Score*
- 79 Lampiran 6.1 : Peringkat 53 Kota Berdasarkan Faktor Tenaga Kerja & Produktivitas/*Rank of 53 Cities Based on the Labour & Productivity Score*
- 80 Lampiran 6.2 : Peringkat 161 Kabupaten Berdasarkan Faktor Tenaga Kerja & Produktivitas/*Rank of 161 Regencies Based on the Labour & Productivity Score*
- 82 Lampiran 7.1 : Peringkat 53 Kota Berdasarkan Faktor Infrastruktur Fisik/*Rank of 53 Cities Based on the Physical Infrastructure*
- 83 Lampiran 7.2 : Peringkat 161 Kabupaten Berdasarkan Faktor Infrastruktur Fisik/*Rank of 161 Regencies Based on the Physical Infrastructure*
- 85 Lampiran 8 : Statistik Perubahan Peringkat Kabupaten/Kota Tahun 2003 – 2004/*Statistics of Changes in Rating of Regencies/Cities, 2003 - 2004*
- 86 Lampiran 9.1 : Hirarkhi Bobot Faktor, Variabel, Indikator Pemeringkatan/*Weighting of Rating Factors, Variables and Indicators*



- 91 Lampiran 9.2 : Penghitungan Nilai Intensitas Dengan Metode AHP/*Calculation of the Value of Indicators Using AHP Method*
- 94 INTENSITAS INDIKATOR DATA PRIMER/*Intensity of Primary Indicators***
- 94 Lampiran 10.A : Intensitas Indikator Faktor Kelembagaan 53 Kota/*The Intensity of 53 Cities of the Institutional Indicators*
- 95 Lampiran 10.B : Intensitas Indikator Faktor Kelembagaan 161 Kabupaten/*The Intensity of 161 Regencies of the Institutional Indicators*
- 98 Lampiran 11.A : Intensitas Indikator Faktor Sosial Politik 53 Kota/*The Intensity of 53 Cities of Socio-Political Indicators*
- 99 Lampiran 11.B : Intensitas Indikator Faktor Sosial Politik 161 Kabupaten/*The Intensity of 161 Regencies of Socio-Political Indicators*
- 102 Lampiran 12.A : Intensitas Indikator Faktor Infrastruktur Fisik 53 Kota/*The Intensity of 53 Cities of Physical Infrastructure Indicators*
- 103 Lampiran 12.B : Intensitas Indikator Faktor Infrastruktur Fisik 161 Kabupaten/*The Intensity of 161 Regencies of Physical Infrastructure Indicators*
- 106 INTENSITAS INDIKATOR DATA SEKUNDER/*Intensity of Secondary Indicators***
- 106 Lampiran 13 : Variabel Keuangan Daerah/*Regional Finance Variables*
- 106 Lampiran 13.A : Variabel Keuangan Daerah 53 Kota/*Regional Finance of 53 Cities*
- 107 Lampiran 13.B : Variabel Keuangan Daerah 161 Kabupaten/*Regional Finance of 161 Regencies*
- 110 Lampiran 14 : Faktor Ekonomi Daerah/*Regional Economic Dynamism*
- 110 Lampiran 14.1 : Variabel Potensi Ekonomi/*Economic Potential*
- 110 Lampiran 14.1.A : Variabel Potensi Ekonomi 53 Kota/*Economic Potential of 53 Cities*
- 111 Lampiran 14.1.A.1 : Intensitas Indikator Pertumbuhan Ekonomi 53 Kota/*The Intensity of 53 Cities of Growth Indicators*
- 112 Lampiran 14.1.B : Variabel Potensi Ekonomi 161 Kabupaten/*Economic Potential of 161 Cities*
- 115 Lampiran 14.1.B.2 : Intensitas Indikator Pertumbuhan Ekonomi 161 Kabupaten/*The Intensity of 161 Regencies of Growth Indicators*
- 118 Lampiran 14.2 : Struktur Ekonomi Daerah/*Economic Structure*
- 118 Lampiran 14.2.A : Variabel Struktur Ekonomi Daerah 53 Kota/*Economic Structure of 53 Cities*
- 119 Lampiran 14.2.B : Variabel Struktur Ekonomi Daerah 161 Kabupaten/*Economic Structure of 161 Regencies*
- 122 Lampiran 15 : Faktor Tenaga Kerja dan Produktivitas/*Labour and Productivity*
- 122 Lampiran 15.1 : Variabel Ketersediaan Tenaga Kerja/*Availability of Manpower*
- 122 Lampiran 15.1.A : Variabel Ketersediaan Tenaga Kerja 53 Kota/*Availability of Manpower of 53 Cities*
- 123 Lampiran 15.1.B : Variabel Ketersediaan Tenaga Kerja 161 Kabupaten/*Availability of Manpower of 161 Regencies*
- 126 Lampiran 15.2 : Variabel Biaya Tenaga Kerja/*Labour Cost*
- 126 Lampiran 15.2.A : Variabel Biaya Tenaga Kerja 53 Kota/*Labour Cost of 53 Cities*
- 127 Lampiran 15.2. B : Variabel Biaya Tenaga Kerja 161 Kabupaten/*Labour Cost of 161 Regencies*
- 130 Lampiran 15.3 : Variabel / Indikator Produktivitas Tenaga Kerja/*Productivity of Labour*
- 130 Lampiran 15.3.A : Variabel Indikator Produktivitas Tenaga Kerja 53 Kota/*Productivity of Labour of 53 Cities*
- 131 Lampiran 15.3.B : Variabel Indikator Produktivitas Tenaga Kerja 161 Kabupaten/*Productivity of Labour of 161 Regencies*

---

# I. Pendahuluan

## *Introduction*

### A. LATAR BELAKANG

Sejak tahun 2001 hingga 2004, di Indonesia terjadi beberapa peristiwa penting dalam kehidupan berbangsa dan bernegara, baik di tingkat nasional maupun di tingkat lokal daerah. Tahun 2001 merupakan tonggak penting dalam pelaksanaan desentralisasi di Indonesia yang ditandai dengan dimulainya pelaksanaan otonomi daerah. Selama 4 tahun pelaksanaan otonomi daerah telah terjadi beberapa perubahan dalam tata pemerintahan di berbagai daerah. Pelaksanaan otonomi daerah disambut oleh pemerintah daerah dengan melakukan pembenahan dalam berbagai aspek kehidupan, mulai dari tata kelembagaan pemerintahan, dan pembenahan di bidang perencanaan perekonomian, serta kemasyarakatan, dan sebagainya. Hal lain yang menyertai pelaksanaan otonomi daerah adalah terjadinya pemekaran wilayah. Jika awal pelaksanaan otonomi daerah tercatat kurang lebih ada 375 daerah kabupaten dan kota, maka dalam waktu empat tahun telah berkembang menjadi 440 kabupaten dan kota. Perubahan-perubahan yang menyertai pelaksanaan otonomi daerah ini sudah barang tentu berpengaruh dalam kehidupan di tingkat lokal dan hingga tingkat nasional. Hingga tahun ke-4 pelaksanaan otonomi daerah belum dapat dikatakan

### A. BACKGROUND

*Between 2001 and 2004, Indonesia experienced several important events in the life of the nation, at both the national and regional levels. The year 2001 was a milestone in Indonesia's decentralization process, marking the start of implementation of regional autonomy. During the four years of implementation of regional autonomy, numerous changes in the patterns of government have been made in many regions. The regional governments welcomed regional autonomy by reordering various aspects of their existence - by altering the structures of government institutions, reorienting economic and social planning, and so on. Another important trend that accompanied the implementation of regional autonomy was the partitioning of regions. At the start of implementation of regional autonomy there were around 375 regencies and cities; four years later, this had grown to 440 regencies and cities. These changes associated with the implementation of regional autonomy have, of course, affected life, from the local to the national level. By the fourth year, it was evident that the implementation of regional autonomy was not yet proceeding entirely as had been expected; there were still many weaknesses in the process of its implementation from the central level to the regions. Consequently, in late 2004 amendments were made to the laws that served as the legal umbrella for regional*

berjalan sebagaimana yang diharapkan. Masih dijumpai beberapa kelemahan dalam proses pelaksanaannya dari tingkat pusat hingga di daerah. Namun demikian, pada akhir tahun 2004 dilakukan revisi terhadap Undang-undang yang menjadi payung pelaksanaan otonomi daerah, yakni UU. No.22 dan 25 tahun 1999, menjadi UU No.32 dan 33 Tahun 2004.

Sementara itu di akhir tahun 2003 hingga menjelang akhir 2004, Indonesia disibukkan dengan pesta demokrasi untuk pemilihan secara langsung anggota legislatif dari level kabupaten/kota hingga tingkat pusat, serta pemilihan presiden secara langsung untuk pertama kalinya. Pesta demokrasi ini telah merubah peta perpolitikan dan kehidupan politik di Indonesia. Di beberapa daerah, perubahan kepemimpinan telah terjadi selama pelaksanaan otonomi daerah. Dalam kurun waktu 2001 – 2004 beberapa daerah telah terlebih dahulu mengalami pergantian kepala daerah, walau prosesnya belum dipilih secara langsung seperti pada pemilu presiden tahun 2004, namun hal tersebut sedikit banyak berpengaruh terhadap kondisi politik dan ekonomi lokal. Secara historis pergantian kepemimpinan di berbagai level pemerintahan sedikit banyak berpengaruh terhadap arah kebijakan dalam tata pemerintahan, baik di bidang politik, ekonomi, maupun kehidupan sosial kemasyarakatan.

Kesibukan bangsa Indonesia dalam penyelenggaraan pesta demokrasi selama tahun 2004, bukan berarti berhenti untuk dalam pembangunan sektor kehidupan bernegara lainnya, terutama dalam membangun perekonomian. Walau harus diakui pula, bahwa kondisi politik tersebut sedikit banyak berpengaruh pada aspek perekonomian baik secara nasional maupun di tingkat lokal daerah. Dilihat dari indikator makro ekonomi Indonesia selama tahun 2001 hingga tahun 2004, terlihat perkembangan yang cukup memberikan harapan. Pertumbuhan ekonomi tahun 2004 mencapai 4,5%, konsumsi terus meningkat, ekspor tumbuh secara positif, kecenderungan penurunan laju inflasi, nilai tukar rupiah yang semakin menguat dan stabil, dan cadangan devisa juga terus meningkat, serta

*autonomy, Laws Number 22 and 25 of 1999, which were revised through Laws Number 32 and 33 of 2004.*

*Meanwhile, from late 2003 through late 2004, Indonesia was busy with its “festival of democracy” – the direct election of legislators at all levels from regencies/cities to the central government level, as well as Indonesia’s first-ever direct presidential election. This festival of democracy has changed the political map and political life of Indonesia. In many regions, there have been changes in leadership during the implementation of regional autonomy. Between 2001 and 2004, many regions had already replaced the heads of the regions. Even though this was not done through direct elections, as with the 2004 presidential election, it did have some impact on local political and economic conditions. Historically, changes in leadership at the various levels of government have affected the direction of policy, whether political, economic, or social.*

*The Indonesian nation’s preoccupation with its elections during 2004 did not halt the development of other aspects of public life, such as economic development. However, it must be acknowledged that the political situation did to some extent affect the economy, at both the national and local levels. Indonesia’s macroeconomic indicators for 2001 through 2004 show very promising developments. Economic growth in 2004 reached 4.5%, consumption continued to rise, exports grew positively, the inflation rate tended to decline, the Rupiah exchange rate strengthened and stabilized, foreign exchange reserves grew, and the composite share price index rose. These facts might indicate that Indonesia’s economy is steadily improving. Yet other economic indicators show less promising developments. The realization of investments, both foreign and domestic, showed a slight decline in 2004*

membaiknya indeks harga saham gabungan. Hal ini dapat dijadikan indikasi bahwa perekonomian Indonesia semakin membaik. Namun demikian indikator ekonomi yang lain memperlihatkan perkembangan yang kurang menggembirakan. Dilihat dari perkembangan realisasi investasi baik PMA maupun PMDN selama tahun 2004 sedikit mengalami penurunan dibandingkan tahun 2003. Apakah hal ini berarti daya tarik investasi Indonesia selama tahun 2004 mengalami penurunan ?

Kondisi ekonomi makro secara nasional tentunya berpengaruh terhadap kondisi perekonomian di tingkat daerah. Dinamika ekonomi dan politik diberbagai tingkat pemerintahan juga memberikan andil yang besar dalam perkembangan ekonomi daerah. Pelaksanaan otonomi daerah, telah mendorong banyak daerah untuk melakukan berbagai perubahan dalam kebijakan pembangunan daerahnya. Namun demikian dari 440 kabupaten / kota menggambarkan perkembangan yang tidak merata. Beberapa pemerintah daerah juga telah sadar akan pentingnya pembangunan ekonomi yang berkelanjutan, dan pentingnya peran investasi dalam pembangunan ekonomi di daerah.

Dari pemeringkatan Daya Tarik Investasi Kabupaten / Kota yang dilakukan oleh KPPOD, sejak tahun 2001, hingga tahun 2003, dapat dilihat bahwa kondisi perekonomian daerah, terutama iklim investasi, ditemukan sejumlah persoalan yang masih mengganjal dalam daya tarik investasi di daerah-daerah kabupaten/kota di Indonesia. Seperti apakah peringkat daya tarik daerah Kabupaten/Kota terhadap investasi dalam persepsi dunia usaha di tahun 2004 ? Apakah ada perubahan peringkat daya tarik investasi kabupaten/kota tahun 2003 dibandingkan dengan tahun sebelumnya dan faktor-faktor apa yang menyebabkan perubahan tersebut ? Sebagai agenda tahunan, pada tahun 2004 KPPOD kembali melakukan pemeringkatan Daya Tarik Investasi Kabupaten / Kota di Indonesia. Pemeringkatan ini dimaksudkan untuk terus mengikuti perkembangan iklim investasi di berbagai daerah di Indonesia.

*compared with 2003. Could this mean that Indonesia's investment attractiveness also declined during 2004?*

*Certainly, macroeconomic conditions at the national level affect economic conditions at the regional level. The economic and political dynamics at the various levels of government also play a significant role in regional economic development. The implementation of regional autonomy has encouraged many regions to effect changes in their regional development policies. However, the 440 regencies/cities show an uneven pattern of development. Many regional governments have now come to realize the importance of sustainable economic development, and the importance of the role of investment in economic development in their regions.*

*The Investment Attractiveness Ratings of Regencies/Cities carried out by Regional Autonomy Watch from 2001 to 2003 indicate that regional economic conditions, particularly the investment climate, display a number of problems that reduce the investment attractiveness of regencies and cities in Indonesia. What are the perceptions of the business community regarding the investment attractiveness of regencies/cities in 2004? Have there been changes in the investment attractiveness ratings of the regencies/cities compared with previous years, and what factors have produced these changes? As it does every year, in 2004 Regional Autonomy Watch again rated the Investment Attractiveness of Regencies/Cities in Indonesia. These ratings are aimed at tracking developments in the investment climate in various regions of Indonesia.*

**B. TUJUAN PENELITIAN**

1. Membuat pemeringkatan daya tarik investasi daerah berdasarkan persepsi dunia usaha.
2. Melihat perubahan peringkat daya tarik investasi daerah kabupaten/kota, dan faktor-faktor yang menyebabkannya.

**C. SIGNIFIKANSI PENELITIAN**

1. Dapat membantu daerah-daerah dalam melihat daya tariknya terhadap investasi ditinjau dari berbagai aspek.
2. Mendorong kompetisi antar daerah dalam menciptakan iklim investasi yang kondusif.
3. Sebagai suatu panduan bagi kalangan dunia usaha atau investor dalam membuat keputusan berinvestasi.

***B. AIMS OF THE RESEARCH***

1. *To produce ratings of investment attractiveness of the regions based on the perceptions of the business community.*
2. *To look at changes in the regencies/cities' investment attractiveness ratings and the factors that produced these changes.*

***C. SIGNIFICANCE OF THE RESEARCH***

1. *It will help the regions to know the level of their attractiveness for investment, examined from various angles.*
2. *It will promote competition between regions to create a conducive investment climate.*
3. *It will serve as a guide for the business community and investors in making investment decisions.*

---

## II. Kerangka Pemikiran

### *Conceptual Framework*

Daya tarik investasi suatu negara atau suatu daerah tidak terjadi dengan serta merta. Pembentukan daya tarik investasi, berlangsung secara terus-menerus dari waktu ke waktu dan dipengaruhi oleh banyak aspek. Faktor ekonomi, politik dan kelembagaan, sosial, dan budaya, diyakini merupakan beberapa faktor pembentuk daya tarik investasi suatu negara atau daerah. Dalam konteks pembangunan regional, investasi memegang peran penting untuk mendorong pertumbuhan ekonomi. Secara umum investasi atau penanaman modal, baik dalam bentuk penanaman modal dalam negeri (PMDN) maupun penanaman modal asing (PMA) membutuhkan adanya iklim yang sehat dan kemudahan serta kejelasan prosedur penanaman modal. Iklim investasi daerah juga dipengaruhi oleh kondisi makroekonomi daerah yang bersangkutan. Kondisi inilah yang mampu menggerakkan sektor swasta untuk ikut serta dalam menggerakkan roda ekonomi.

Secara umum investasi akan masuk ke suatu daerah tergantung dari daya tarik daerah tersebut terhadap investasi, dan adanya iklim investasi yang kondusif. Keberhasilan daerah untuk meningkatkan daya tariknya terhadap investasi salah satunya tergantung dari kemampuan daerah dalam merumuskan kebijakan yang berkaitan dengan

*The investment attractiveness of a country, or of a region, is not created in a vacuum. The creation of investment attractiveness proceeds continuously over time, and is influenced by many aspects. Economic, political, institutional, social, and cultural factors are among the many factors that affect the investment attractiveness of a country or a region. In the context of regional development, investment plays an important role in promoting economic growth. Generally speaking, investment, whether domestic or foreign, requires a healthy investment climate as well as ease and clarity regarding investment procedures. A region's investment climate is also influenced by the macroeconomic conditions of the region concerned. All these conditions can motivate the private sector to participate in activating the economy.*

*In general, the amount and type of investment that enters a region depends on the attractiveness of the region for investment and the existence of a conducive investment climate. A region's success in increasing its attractiveness for investment depends in part on the region's capability to formulate policies related to investment and the business community and to*



investasi dan dunia usaha serta peningkatan kualitas pelayanan terhadap masyarakat. Hal yang juga penting untuk diperhatikan dalam upaya menarik investor, selain kondisi makroekonomi yang kondusif juga adanya pengembangan sumber daya manusia dan infrastruktur dalam artian luas.

Berdasarkan identifikasi tingkat dan elemen-elemen untuk tujuan pemeringkatan daya tarik daerah Kabupaten/Kota terhadap investasi, dari pemahaman studi literatur, opini para pelaku usaha, masukan para ahli dan hasil pemeringkatan yang dilakukan KPPOD sebelumnya; variabel-variabel yang mempengaruhi daya tarik investasi daerah dapat dikelompokkan kedalam 5 (lima) faktor sebagai berikut : I. Kelembagaan, II. Sosial Politik, III. Perekonomian Daerah, IV. Tenaga Kerja dan Produktivitas, V. Infrastruktur Fisik, seperti terlihat pada Diagram 1. di bawah ini.

*improving the quality of public services. Other important matters to consider in connection with efforts to attract investment, aside from conducive macroeconomic conditions, are the development of human resources and of infrastructure in the widest sense.*

*Based on an identification of ranks and elements for the purpose of rating the investment attractiveness of regencies/cities, derived from an understanding of the literature, the opinions of business operators, input from experts, and the ratings produced by Regional Autonomy Watch in previous years, the variables that affect a region's investment attractiveness can be grouped into five (5) categories, as follows: I. Institutions, II. Social/Political, III. Regional Economy, IV. Labour and Productivity, and V. Physical Infrastructure, as shown in Diagram 1 below.*

**Diagram/Figure 1.**  
**Hirarki Faktor & Variabel Pemeringkatan/Hierarchy of Rating Factors & Variables**

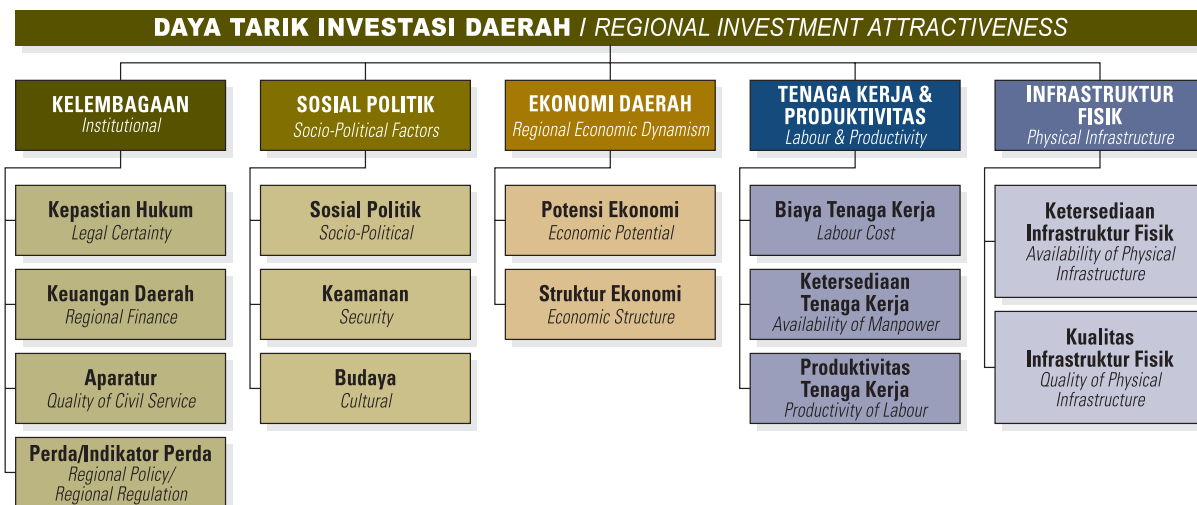

Penjabaran dan pengembangan kelima faktor/kelompok variabel tersebut ke dalam masing-masing indikator dari setiap variabel, dilakukan juga atas dasar studi literatur, diskusi dengan para ahli dan kalangan dunia usaha. Adapun Faktor, Variabel, dan Indikator yang digunakan untuk pemeringkatan tahun 2004 ini adalah sebagaimana dijabarkan dalam tabel di bawah ini.

*The elaboration and development of these five factors/ sets of variables into the respective indicators for each variable was also done on the basis of the literature study and discussions with experts and with the business community. The Factors, Variables, and Indicators used for the 2004 ratings are as explained in the table below.*

Tabel/Table. 1

**DAFTAR FAKTOR - VARIABEL - INDIKATOR UNTUK PEMERINGKATAN TAHUN 2004**  
**LIST OF FACTORS - VARIABLES - INDICATORS FOR 2004 RATINGS**

| NO.                                                                       | FAKTOR - VARIABEL - INDIKATOR<br>FACTOR - VARIABLE - INDICATOR                                                                                | KETERANGAN<br>NOTES                                                                                                                                                                                                                                                                                                                                                                                                     |
|---------------------------------------------------------------------------|-----------------------------------------------------------------------------------------------------------------------------------------------|-------------------------------------------------------------------------------------------------------------------------------------------------------------------------------------------------------------------------------------------------------------------------------------------------------------------------------------------------------------------------------------------------------------------------|
| <b>A. FAKTOR KELEMBAGAAN /INSTITUTIONAL FACTOR</b>                        |                                                                                                                                               |                                                                                                                                                                                                                                                                                                                                                                                                                         |
| <b>1. Variabel Kepastian Hukum /Legal Certainty Variable</b>              |                                                                                                                                               |                                                                                                                                                                                                                                                                                                                                                                                                                         |
| 1                                                                         | Konsistensi Peraturan yang Mengatur Kegiatan Usaha<br><br><i>Consistency of Regulations that Regulate Business Activities</i>                 | Mengukur kepastian, kejelasan, dan konsistensi pemberlakuan peraturan daerah dan kebijakan lainnya yang mengatur kehidupan berusaha.<br><br><i>Measures certainty, clarity, and consistency of application of regional regulations and other policies that regulate business life.</i>                                                                                                                                  |
| 2                                                                         | Penegakan Hukum<br><br><i>Law Enforcement</i>                                                                                                 | Mengukur kepastian hukum seperti perlindungan atas pelaksanaan kontrak kerja dan hak kepemilikan, konsistensi keputusan pengadilan, terutama yang berkaitan dengan dunia usaha.<br><br><i>Measures legal certainty, such as protection for the performance of work contracts and ownership rights, and consistency of court decisions, particularly in connection with the business community.</i>                      |
| 3                                                                         | Pungli di luar Birokrasi terhadap Kegiatan Usaha<br><br><i>Non-bureaucratic Illegal Levies on Business Activities</i>                         | Melihat penanganan yang dilakukan oleh pemerintah daerah terhadap berbagai praktik-praktik pungutan ilegal yang dilakukan oleh orang, kelompok orang/ masyarakat di luar birokrasi, yang mengganggu kegiatan usaha.<br><br><i>Looks at how the regional government handles various types of illegal levies imposed by individuals or groups/ communities outside the bureaucracy, which impede business activities.</i> |
| 4                                                                         | Hubungan Eksekutif – Legislatif<br><br><i>Executive-Legislative Relationship</i>                                                              | Melihat dampak dari kondisi hubungan antara DPRD dan Pemda terhadap pelayanan publik dan kepastian berusaha.<br><br><i>Examines the impact of the state of relations between the DPRD [Regional Assembly] and Pemda [Regional Executive] on public services and on business certainty.</i>                                                                                                                              |
| <b>2. Variabel Aparatur dan Pelayanan/Apparatus and Services Variable</b> |                                                                                                                                               |                                                                                                                                                                                                                                                                                                                                                                                                                         |
| 5                                                                         | Birokrasi Pelayanan terhadap Dunia Usaha<br><br><i>Bureaucracy of Services for the Business Community</i>                                     | Mengukur kemudahan pelayanan birokrasi dan profesionalisme aparat pemda dalam melakukan pelayanan terhadap dunia usaha.<br><br><i>Measures ease of services of the bureaucracy and professionalism of local government officials in providing services to the business community.</i>                                                                                                                                   |
| 6                                                                         | Penyalahgunaan Wewenang<br><br><i>Abuse of Authority</i>                                                                                      | Mengukur distorsi perilaku aparat pemda dalam melakukan pelayanan terhadap dunia usaha.<br><br><i>Measures distortions in the behavior of local government officials in providing services to the business community.</i>                                                                                                                                                                                               |
| <b>3. Variabel Keuangan Daerah/Regional Finance Variable</b>              |                                                                                                                                               |                                                                                                                                                                                                                                                                                                                                                                                                                         |
| 7                                                                         | Struktur Pungutan oleh Pemerintah Daerah terhadap Dunia Usaha<br><br><i>Structure of Regional Government Fees from the Business Community</i> | Melihat struktur berbagai pungutan yang berlaku di daerah, khususnya pajak dan retribusi daerah.<br><br><i>Examines the structure of the various fees applying in the region, especially regional taxes and levies.</i>                                                                                                                                                                                                 |

| NO.                                                     | FAKTOR - VARIABEL - INDIKATOR<br>FACTOR - VARIABLE - INDICATOR                                     | KETERANGAN<br>NOTES                                                                                                                                                                                                                                                                                                                                                                                                                                                                                                                            |
|---------------------------------------------------------|----------------------------------------------------------------------------------------------------|------------------------------------------------------------------------------------------------------------------------------------------------------------------------------------------------------------------------------------------------------------------------------------------------------------------------------------------------------------------------------------------------------------------------------------------------------------------------------------------------------------------------------------------------|
| 8                                                       | Komitmen Pemerintah Daerah dalam Penyediaan Sarana Pendukung Kegiatan Usaha                        | Mengukur komitmen pemerintah daerah dalam melakukan pembangunan infrastruktur fisik yang diperlukan untuk mendukung kegiatan usaha, yang tercermin dari pengalokasian dana untuk anggaran pembangunan.                                                                                                                                                                                                                                                                                                                                         |
|                                                         | <i>Regional Government's Commitment to Providing Support Facilities for the Business Community</i> | <i>Measures the regional government's commitment to constructing physical infrastructure needed to support business activities, as reflected in the allocation of funds for development budget.</i>                                                                                                                                                                                                                                                                                                                                            |
| <b>4. Variabel Perda/Regional Regulations Variable</b>  |                                                                                                    |                                                                                                                                                                                                                                                                                                                                                                                                                                                                                                                                                |
| 9                                                       | Peraturan Produk Hukum Daerah (Pajak dan Retribusi)                                                | Mengukur kualitas kebijakan / produk hukum yang dibuat oleh pemerintah daerah (Perda, SK Bupati/Wali Kota dan Sebagainya) khususnya yang berkaitan dengan dunia usaha. Beberapa aspek yang dinilai dari peraturan / kebijakan daerah tersebut adalah aspek yuridis, filosofi, substansi, maupun prinsip dan dampak yang mungkin ditimbulkan dari pemberlakuan produk hukum tersebut. Beberapa hal yang dilihat adalah peraturan yang berkaitan dengan pelayanan, pungutan, penetapan harga, ketenagakerjaan dan sebagainya.                    |
|                                                         | <i>Regional Legal Products/Regulations (Taxes and Levies)</i>                                      | <i>Measures the quality of policy/ legal products produced by the regional government (Regional Regulations (Perda), Decrees of Regents/Mayors, etc.), particularly in connection with the business community. Among the aspects on which regional regulations/policies are evaluated are the juridical aspect, philosophy, substance, principles, and impact that could arise from the application of these legal products. Matters examined include regulations related to services, fees, setting of prices, Labour matters, and so on.</i> |
| <b>B. FAKTOR KONDISI SOSPOL/SOCIAL/POLITICAL FACTOR</b> |                                                                                                    |                                                                                                                                                                                                                                                                                                                                                                                                                                                                                                                                                |
| <b>1. Variabel Keamanan/Security Variable</b>           |                                                                                                    |                                                                                                                                                                                                                                                                                                                                                                                                                                                                                                                                                |
| 10                                                      | Gangguan Keamanan terhadap Aktivitas Dunia Usaha                                                   | Mengukur hambatan kegiatan usaha yang ditimbulkan oleh gangguan keamanan terhadap aktivitas usaha.                                                                                                                                                                                                                                                                                                                                                                                                                                             |
|                                                         | <i>Disturbances to Security of Business Community Activities</i>                                   | <i>Measures obstacles to business activity resulting from security disturbances.</i>                                                                                                                                                                                                                                                                                                                                                                                                                                                           |
| 11                                                      | Gangguan Keamanan terhadap Masyarakat Lingkungan Sekitar Tempat Kegiatan Usaha                     | Mengukur hambatan keamanan dan rasa aman masyarakat di lingkungan kegiatan usaha.                                                                                                                                                                                                                                                                                                                                                                                                                                                              |
|                                                         | <i>Disturbances to Security of Local Communities near Places of Business</i>                       | <i>Measures obstacles to public security and feelings of security of communities near places of business.</i>                                                                                                                                                                                                                                                                                                                                                                                                                                  |
| 12                                                      | Kecepatan Aparat Menanggulangi Gangguan Keamanan                                                   | Mengukur kualitas aparat keamanan dalam menangani gangguan keamanan / ketertiban umum, serta jaminan dan perlindungan keamanan yang dapat diberikan oleh aparat keamanan di daerah.                                                                                                                                                                                                                                                                                                                                                            |
|                                                         | <i>Officials' Reaction Time in Responding to Security Disturbances</i>                             | <i>Measures quality of security apparatus in handling security/ public order disturbances, and security guarantees and protection that local security apparatus can provide.</i>                                                                                                                                                                                                                                                                                                                                                               |
| <b>2. Variabel Sospol/Socio-political Variable</b>      |                                                                                                    |                                                                                                                                                                                                                                                                                                                                                                                                                                                                                                                                                |
| 13                                                      | Partisipasi Masyarakat / Dunia Usaha dalam Perumusan Kebijakan Pemerintah Daerah                   | Mengukur keterbukaan birokrasi terhadap partisipasi masyarakat / dunia usaha dalam perumusan kebijakan yang menyangkut kepentingannya (dunia usaha). Mengukur keterbukaan / peluang masyarakat untuk ikut mengawasi pelaksanaan kebijakan.                                                                                                                                                                                                                                                                                                     |
|                                                         | <i>Participation by the Public/ Business Community in Formulating Regional Government Policy</i>   | <i>Measures openness of the bureaucracy to participation by the public/ business community in formulation of policy that affects their interests. Measures openness/ opportunities for the public to take part in overseeing the implementation of policies.</i>                                                                                                                                                                                                                                                                               |

| NO.                                                            | FAKTOR - VARIABEL - INDIKATOR<br>FACTOR - VARIABLE - INDICATOR | KETERANGAN<br>NOTES                                                                                                                                                                                                                                                  |
|----------------------------------------------------------------|----------------------------------------------------------------|----------------------------------------------------------------------------------------------------------------------------------------------------------------------------------------------------------------------------------------------------------------------|
| 14                                                             | Potensi Konflik di masyarakat                                  | Mengukur potensi hambatan dalam kegiatan usaha yang ditimbulkan oleh konflik sosial di lingkungan usaha.                                                                                                                                                             |
|                                                                | <i>Potential for Social Conflicts</i>                          | <i>Measures potential obstacles to business activities resulting from social conflicts in the business environment.</i>                                                                                                                                              |
| 15                                                             | Stabilitas Politik                                             | Mengukur hambatan dalam kegiatan usaha yang ditimbulkan oleh konflik politik yang ada di daerah.                                                                                                                                                                     |
|                                                                | <i>Political Stability</i>                                     | <i>Measures obstacles to business activities resulting from political conflicts that exist in the region.</i>                                                                                                                                                        |
| 16                                                             | Intensitas Unjuk Rasa                                          | Mengukur intensitas kegiatan unjuk rasa yang dapat menghambat / mengganggu kelancaran kegiatan usaha.                                                                                                                                                                |
|                                                                | <i>Frequency/ Intensity of Demonstrations</i>                  | <i>Measures the intensity of demonstrations that could impede/ disrupt the smooth execution of business activities.</i>                                                                                                                                              |
| <b>3. Variabel Budaya Masyarakat/Cultural Variable</b>         |                                                                |                                                                                                                                                                                                                                                                      |
| 17                                                             | Keterbukaan Masyarakat terhadap Dunia Usaha                    | Mengukur daya dukung masyarakat terhadap kegiatan usaha dilihat dari penerimaan masyarakat terhadap keberadaan kegiatan usaha, masuknya investasi dari luar daerah dan para pendatang yang melakukan kegiatan usaha / bekerja di daerahnya.                          |
|                                                                | <i>Openness of the Public to the Business Community</i>        | <i>Measures public supportiveness for business activities, as seen from public acceptance of the presence of business activities, entry of investment from outside the region, and outsiders/ newcomers who carry out business activities or work in the region.</i> |
| 18                                                             | Perilaku Masyarakat yang Non Diskriminasi                      | Mengukur daya dukung masyarakat sekitar tempat usaha dilihat dari perlakuannya terhadap orang lain dari luar secara sama tanpa melihat perbedaan yang ada (suku, agama, ras, gender dan sebagainya)                                                                  |
|                                                                | <i>Non-Discriminatory Public Behavior</i>                      | <i>Measures supportiveness of communities near places of business as seen from their equal treatment of others from outside the region, without discriminating on the basis of actual differences (ethnic group, religion, race, gender, etc.)</i>                   |
| 19                                                             | Adat Istiadat Masyarakat Daerah                                | Melihat daya dukung nilai-nilai dan adat-istiadat yang berkembang di masyarakat yang mendukung produktivitas.                                                                                                                                                        |
|                                                                | <i>Local Community Traditions</i>                              | <i>Examines the supportiveness of traditional values and customs existing in the local community as they affect productivity.</i>                                                                                                                                    |
| 20                                                             | Etos Kerja Masyarakat Daerah                                   | Mengukur daya dukung penduduk, masyarakat, pelaku usaha, dan pekerja di daerah yang menunjukkan etos kerja dan semangat kerja keras dan dapat bersaing secara sehat.                                                                                                 |
|                                                                | <i>Work Ethic of the Local Community</i>                       | <i>Measures the supportiveness of local residents, communities, business operators, and workers in the region that demonstrates a work ethic, spirit of hard work, and ability to compete in a healthy way.</i>                                                      |
| <b>C. FAKTOR EKONOMI DAERAH/REGIONAL ECONOMY FACTOR</b>        |                                                                |                                                                                                                                                                                                                                                                      |
| <b>1. Variabel Potensi Ekonomi/Economic Potential Variable</b> |                                                                |                                                                                                                                                                                                                                                                      |
| 21                                                             | Daya Beli Masyarakat                                           | Mengukur tingkat kesejahteraan dilihat dari penghasilan rata-rata masyarakat.                                                                                                                                                                                        |
|                                                                | <i>Public Buying Power</i>                                     | <i>Measures level of prosperity as seen from average local incomes.</i>                                                                                                                                                                                              |

| NO.                                                                       | FAKTOR - VARIABEL - INDIKATOR<br>FACTOR - VARIABLE - INDICATOR                          | KETERANGAN<br>NOTES                                                                                                                   |
|---------------------------------------------------------------------------|-----------------------------------------------------------------------------------------|---------------------------------------------------------------------------------------------------------------------------------------|
| 22                                                                        | Pertumbuhan Ekonomi Daerah                                                              | Melihat potensi ekonomi daerah dari proyeksi perkembangan / pertumbuhan perekonomian di daerah.                                       |
|                                                                           | <i>Regional Economic Growth</i>                                                         | <i>Examines the potential of the regional economy through projections of economic growth/development in the region.</i>               |
| 23                                                                        | Kesejahteraan dan Produktivitas Masyarakat                                              | Mengukur kesejahteraan dan produktivitas, kualitas hidup penduduk di daerah.                                                          |
|                                                                           | <i>Public Welfare and Productivity</i>                                                  | <i>Measures welfare, productivity, and quality of life of local residents.</i>                                                        |
| <b>2. Variabel Struktur Ekonomi/Economic Structure Variable</b>           |                                                                                         |                                                                                                                                       |
| 24                                                                        | Nilai Tambah Sektor Primer                                                              | Untuk melihat struktur perekonomian daerah dan yang berbasis pada SDA.                                                                |
|                                                                           | <i>Added Value of Primary Sector</i>                                                    | <i>Examines structure of regional economy and its natural resource base.</i>                                                          |
| 25                                                                        | Nilai Tambah Sektor Sekunder                                                            | Mengukur struktur perekonomian daerah yang sudah terbiasa dalam kegiatan ekonomi produktif, dan industrialisasi.                      |
|                                                                           | <i>Added Value of Secondary Sector</i>                                                  | <i>Measures regional economic structure's habits in productive economic activities, and industrialization.</i>                        |
| 26                                                                        | Nilai Tambah Sektor Tersier                                                             | Mengukur Kemampuan Jasa Lembaga Keuangan dalam perekonomian daerah.                                                                   |
|                                                                           | <i>Added Value of Tertiary Sector</i>                                                   | <i>Measures capability of financial institutions' services in the regional economy.</i>                                               |
| <b>D. FAKTOR KETENAGAKERJAAN/LABOUR FACTOR</b>                            |                                                                                         |                                                                                                                                       |
| <b>1. Variabel Ketersediaan Tenaga Kerja/Labour Availability Variable</b> |                                                                                         |                                                                                                                                       |
| 27                                                                        | Ketersediaan Tenaga Kerja Usia Produktif                                                | Mengukur besarnya penduduk usia produktif yang dibutuhkan sebagai tenaga kerja pada kegiatan usaha.                                   |
|                                                                           | <i>Availability of Work Force of Productive Age</i>                                     | <i>Measures number of residents of productive age needed as work force for business activities.</i>                                   |
| 28                                                                        | Ketersediaan Tenaga Kerja Berpengalaman Berpendidikan Minimal SLTP                      | Mengukur ketersediaan tenaga kerja yang sudah berpengalaman sebagai tenaga kerja pada sektor kegiatan usaha secara formal.            |
|                                                                           | <i>Availability of Experienced Work Force with Minimum Junior High School Education</i> | <i>Measures availability of experienced workers to serve as work force for formal business activities.</i>                            |
| 29                                                                        | Ketersediaan Tenaga Kerja Pencari Kerja                                                 | Mengukur ketersediaan pencari kerja untuk mengisi lapangan pekerjaan yang dibutuhkan oleh dunia usaha.                                |
|                                                                           | <i>Availability of Job Seekers</i>                                                      | <i>Measures availability of job seekers to fill job openings as needed by the business community.</i>                                 |
| <b>2. Variabel Biaya Tenaga Kerja/Labour Cost Variable</b>                |                                                                                         |                                                                                                                                       |
| 30                                                                        | Biaya Tenaga Kerja berdasarkan Aturan Formal                                            | Mengukur tingkat kompensasi untuk pekerja secara keseluruhan berdasarkan aturan formal sebagai biaya yang dikeluarkan oleh pengusaha. |
|                                                                           | <i>Labour Costs as Based on Formal Standards</i>                                        | <i>Measures overall levels of compensation for workers, based on formal standards, as the costs expended by business operators.</i>   |

| NO.                                                                                                     | FAKTOR - VARIABEL - INDIKATOR<br>FACTOR - VARIABLE - INDICATOR | KETERANGAN<br>NOTES                                                                                                              |
|---------------------------------------------------------------------------------------------------------|----------------------------------------------------------------|----------------------------------------------------------------------------------------------------------------------------------|
| 31                                                                                                      | Biaya Tenaga Kerja Aktual                                      | Mengukur biaya tenaga kerja berdasarkan sektor-sektor usaha yang sesungguhnya akan dikeluarkan oleh pengusaha.                   |
|                                                                                                         | <i>Actual Labour Costs</i>                                     | <i>Measures Labour costs by business sector as actually expended by business operators.</i>                                      |
| <b>3. Variabel Produktivitas &amp; Kualitas Tenaga Kerja/Labour Productivity &amp; Quality Variable</b> |                                                                |                                                                                                                                  |
| 32                                                                                                      | Produktivitas Tenaga Kerja                                     | Mengukur Produktivitas pekerja sektor manufaktur.                                                                                |
|                                                                                                         | <i>Labour Productivity</i>                                     | <i>Measures productivity of workers in the manufacturing sector.</i>                                                             |
| <b>E. FAKTOR INFRASTRUKTUR/INFRASTRUCTURE FACTOR</b>                                                    |                                                                |                                                                                                                                  |
| <b>1. Variabel Ketersediaan Infrastruktur/Infrastructure Availability Variable</b>                      |                                                                |                                                                                                                                  |
| 33                                                                                                      | Ketersediaan Jalan                                             | Mengukur Ketersediaan Infrastruktur untuk Transportasi Darat                                                                     |
|                                                                                                         | <i>Availability of Roads</i>                                   | <i>Measures availability of infrastructure for land transportation</i>                                                           |
| 34                                                                                                      | Ketersediaan Pelabuhan Laut                                    | Mengukur Ketersediaan Infrastruktur Transportasi Laut                                                                            |
|                                                                                                         | <i>Availability of Sea Ports</i>                               | <i>Measures availability of infrastructure for sea transportation</i>                                                            |
| 35                                                                                                      | Ketersediaan Pelabuhan Udara                                   | Mengukur Ketersediaan Infrastruktur Transportasi Udara.                                                                          |
|                                                                                                         | <i>Availability of Airports</i>                                | <i>Measures availability of infrastructure for air transportation.</i>                                                           |
| 36                                                                                                      | Ketersediaan Saluran (sambungan) Telpo                         | Mengukur Ketersediaan Sarana Komunikasi.                                                                                         |
|                                                                                                         | <i>Availability of Telephone Lines (Connections)</i>           | <i>Measures availability of communication facilities.</i>                                                                        |
| 37                                                                                                      | Ketersediaan Saluran (sambungan) Listrik                       | Mengukur Ketersediaan Listrik untuk Sebagai sumber Energi untuk Aktivitas Usaha.                                                 |
|                                                                                                         | <i>Availability of Electricity Lines (Connections)</i>         | <i>Measures availability of electricity as an energy source for business activities.</i>                                         |
| <b>2. Variabel Kualitas Infrastruktur/Infrastructure Quality Variable</b>                               |                                                                |                                                                                                                                  |
| 38                                                                                                      | Kualitas Jalan                                                 | Mengukur kualitas infrastruktur fisik yang tersedia di daerah, sebagai penunjang kegiatan usaha.                                 |
|                                                                                                         | <i>Quality of Roads</i>                                        | <i>Measures quality of physical infrastructure available in the region as support for business activities.</i>                   |
| 39                                                                                                      | Akses & Tipe Pelabuhan Laut                                    | Mengukur kemudahan akses, kelancaran, dan kapasitas sarana transportasi laut, sebagai penunjang kegiatan usaha.                  |
|                                                                                                         | <i>Access to and Types of Seaports</i>                         | <i>Measures ease of access, smooth flow, and capacity of sea transportation facilities as support for business activities.</i>   |
| 40                                                                                                      | Akses & Tipe Pelabuhan Udara                                   | Mengukur kemudahan dan kelancaran sarana transportasi udara yang tersedia di daerah untuk mempermudah aktivitas bisnis / usaha.  |
|                                                                                                         | <i>Access to and Types of Airports</i>                         | <i>Measures ease and smooth flow of air transportation facilities available in the region to facilitate business activities.</i> |



| NO. | FAKTOR - VARIABEL - INDIKATOR<br>FACTOR - VARIABLE - INDICATOR        | KETERANGAN<br>NOTES                                                                                                                                          |
|-----|-----------------------------------------------------------------------|--------------------------------------------------------------------------------------------------------------------------------------------------------------|
| 41  | Kualitas Sambungan Telpon<br><i>Quality of Tele-phone Connections</i> | Mengukur kualitas kelancaran sarana komunikasi di daerah<br><i>Measures quality and smooth operation of communication facilities in the region.</i>          |
| 42  | Kualitas Suplai Listrik<br><i>Quality of Electricity Supply</i>       | Mengukur kualitas sumber energi sarana pendukung kegiatan usaha.<br><i>Measures quality of electric power as a support facility for business activities.</i> |

---

### III. Metodologi Penelitian

#### *Research Methodology*

##### A. RUANG LINGKUP PENELITIAN

Penelitian ini difokuskan pada daerah-daerah Kabupaten dan Kota, dengan pertimbangan bahwa otonomi daerah menempatkan daerah Kabupaten/Kota sebagai ujung tombak dalam pelayanan kepada masyarakat dan pembangunan. Perkembangan kebijakan desentralisasi di Indonesia telah menempatkan daerah Kabupaten/Kota pada posisi strategis dalam persaingan antar negara dalam memperebutkan investasi.

Pemeringkatan daya tarik investasi Kabupaten/Kota di Indonesia untuk tahun 2004 dilakukan terhadap 214 daerah (163 Kabupaten dan 51 Kota) di 29 Propinsi dari 440 daerah Kabupaten dan Kota di seluruh Indonesia. Dari 214 Kabupaten / Kota tersebut, 200 daerah diantaranya merupakan daerah Kabupaten/Kota yang telah diperingkat pada tahun 2003, artinya ada penambahan 14 daerah. Penambahan daerah ini didasarkan pada pertimbangan untuk semakin memperluas cakupan penelitian, serta agar semakin banyak daerah yang terwakili.

##### A. SCOPE OF THE RESEARCH

*This research is focused on Regency- and City-level regions, because the regional autonomy policy places this level of administration as the spearhead of public services and development. Decentralization policy in Indonesia has placed these regions in a strategic position in international competition to seek investment.*

*In 2004, investment attractiveness ratings of regencies/cities in Indonesia were done for 214 regions (163 regencies and 51 cities) in 29 provinces, out of the 440 regencies and cities throughout Indonesia. Of these 214 regency/city regions, 200 were among those that were rated in 2003, while 14 were added this year. The reasons for increasing the number of regions evaluated were to expand the scope of the research and to increase the number of regions represented.*

## B. DATA PENELITIAN

### B.1. Jenis Data

Data-data yang digunakan untuk penelitian ini merupakan gabungan antara data primer berupa data kualitatif yang diperoleh dengan melakukan survei lapangan kepada narasumber pelaku usaha di daerah, serta data sekunder berupa *existing statistic data*.

#### B.1.1. Data Primer,

- Data bobot faktor, variabel, dan indikator yang mempengaruhi daya tarik terhadap investasi, berdasarkan persepsi dunia usaha.
- Data persepsi dunia usaha berkaitan dengan daya tarik investasi suatu daerah, yang diperoleh melalui survei lapangan (*face to face interview*) maupun *mailing*.

#### B.1.2. Data Sekunder

Berupa data-data statistik daerah (*existing statistic data*) yang dikumpulkan pada penelitian terdahulu maupun laporan yang diberikan oleh pemerintah, diantaranya adalah Perda, Statistik Ekonomi, Ketenagakerjaan, Infrastruktur, Demografi dan sebagainya. Daftar data secara lengkap bisa dilihat pada Tabel di bawah ini

## B. RESEARCH DATA

### B.1. Types of Data

The data used for this research comprised a combination of primary data, in the form of qualitative data obtained by conducting field surveys of business operator informants in the regions, and of secondary data in the form of existing statistical data.

#### B.1.1. Primary Data

- Data on weightings of factors, variables, and indicators that influence attractiveness for investment, based on the perceptions of the business community.
- Data on the business community's perceptions regarding a region's investment attractiveness, obtained from field surveys conducted through both face-to-face interviews and mailings.

#### B.1.2. Secondary Data

Existing statistical data collected in previous research and from reports provided by the governments, among them Regional Regulations (Perda), Statistics on Economy, Labour Matters, Demographics, and so on. A complete list of these data can be seen in the Table below.

**Tabel/Table. 2**  
**DAFTAR DATA JENIS DATA DAN SUMBER DATA**  
**YANG DIGUNAKAN UNTUK PEMERINGKATAN TAHUN 2004**  
**LIST OF TYPES OF DATA AND SOURCES OF DATA USED IN THE 2004 RATINGS**

| NO.                                                         | FAKTOR - VARIABEL - INDIKATOR<br>FACTOR - VARIABLE - INDICATOR       | JENIS DATA<br>TYPE OF DATA         | SUMBER DATA<br>SOURCE OF DATA                                 |
|-------------------------------------------------------------|----------------------------------------------------------------------|------------------------------------|---------------------------------------------------------------|
| <b>A. FAKTOR KELEMBAGAAN/INSTITUTIONAL FACTOR</b>           |                                                                      |                                    |                                                               |
| <b>1. Variabel Kepastian Hukum/Legal Certainty Variable</b> |                                                                      |                                    |                                                               |
| 1                                                           | Konsistensi Peraturan<br><i>Consistency of Regulations</i>           | Data Primer<br><i>Primary Data</i> | Persepsi Dunia Usaha<br><i>Business Community Perceptions</i> |
| 2                                                           | Penegakan Hukum<br><i>Law Enforcement</i>                            | Data Primer<br><i>Primary Data</i> | Persepsi Dunia Usaha<br><i>Business Community Perceptions</i> |
| 3                                                           | Pungli di luar Birokrasi<br><i>Extra-Bureaucratic Illegal Levies</i> | Data Primer<br><i>Primary Data</i> | Persepsi Dunia Usaha<br><i>Business Community Perceptions</i> |

| NO.                                                                              | FAKTOR - VARIABEL - INDIKATOR<br>FACTOR - VARIABLE - INDICATOR                                                             | JENIS DATA<br>TYPE OF DATA                 | SUMBER DATA<br>SOURCE OF DATA                                                          |
|----------------------------------------------------------------------------------|----------------------------------------------------------------------------------------------------------------------------|--------------------------------------------|----------------------------------------------------------------------------------------|
| 4                                                                                | Hubungan Eksekutif – Legislatif<br><i>Executive-Legislative Relations</i>                                                  | Data Primer<br><i>Primary Data</i>         | Persepsi Dunia Usaha<br><i>Business Community Perceptions</i>                          |
| <b>2. Variabel Aparatur dan Pelayanan/<i>Apparatus and Services Variable</i></b> |                                                                                                                            |                                            |                                                                                        |
| 5                                                                                | Birokrasi Pelayanan<br><i>Service Bureaucracy</i>                                                                          | Data Primer<br><i>Primary Data</i>         | Persepsi Dunia Usaha<br><i>Business Community Perceptions</i>                          |
| 6                                                                                | Penyalahgunaan Wewenang<br><i>Abuse of Authority</i>                                                                       | Data Primer<br><i>Primary Data</i>         | Persepsi Dunia Usaha<br><i>Business Community Perceptions</i>                          |
| <b>3. Variabel Keuangan Daerah/<i>Regional Finance Variable</i></b>              |                                                                                                                            |                                            |                                                                                        |
| 7                                                                                | Rasio Penerimaan Retribusi terhadap Pajak<br><i>Ratio of Fees to Taxes in Revenues</i>                                     | Data Sekunder<br><i>Secondary Data</i>     | APBD Kab./Kota Tahun 2002<br><i>2002 Regency/City Budget</i>                           |
| 8                                                                                | Rasio Anggaran Pembangunan terhadap APBD<br><i>Ratio of Development Budget to Regional Budget (APBD)</i>                   | Data Sekunder<br><i>Secondary Data</i>     | APBD Kab./Kota Tahun 2002<br><i>2002 Regency/City Budget</i>                           |
| <b>4. Variabel Perda/<i>Regional Regulation (Perda) Variable</i></b>             |                                                                                                                            |                                            |                                                                                        |
| 9                                                                                | Peraturan Produk Hukum Daerah (Pajak dan Retribusi)<br><i>Regional Legal Products/ Regulations (Taxes and Levies)</i>      | Analisis Perda<br><i>Analysis of Perda</i> | Perda, SK Kepala Daerah Kab/Kota<br><i>Perda, Decrees of Heads of Regencies/Cities</i> |
| <b>B. FAKTOR KONDISI SOSPOL/<i>SOCIAL/POLITICAL CONDITIONS FACTOR</i></b>        |                                                                                                                            |                                            |                                                                                        |
| <b>1. Variabel Keamanan/<i>Security Variable</i></b>                             |                                                                                                                            |                                            |                                                                                        |
| 10                                                                               | Gangguan Keamanan terhadap Dunia Usaha<br><i>Disruptions of Business Community Security</i>                                | Data Primer<br><i>Primary Data</i>         | Persepsi Dunia Usaha<br><i>Business Community Perceptions</i>                          |
| 11                                                                               | Gangguan Keamanan terhadap Masyarakat<br><i>Disruptions of Public Security</i>                                             | Data Primer<br><i>Primary Data</i>         | Persepsi Dunia Usaha<br><i>Business Community Perceptions</i>                          |
| 12                                                                               | Kecepatan Aparat Menanggulangi Gangguan Keamanan<br><i>Officials' Reaction Time in Responding to Security Disturbances</i> | Data Primer<br><i>Primary Data</i>         | Persepsi Dunia Usaha<br><i>Business Community Perceptions</i>                          |
| <b>2. Variabel Sospol /<i>Social/Political Variable</i></b>                      |                                                                                                                            |                                            |                                                                                        |
| 13                                                                               | Partisipasi Masyarakat<br><i>Public Participation</i>                                                                      | Data Primer<br><i>Primary Data</i>         | Persepsi Dunia Usaha<br><i>Business Community Perceptions</i>                          |
| 14                                                                               | Potensi Konflik di masyarakat<br><i>Potential for Community Conflict</i>                                                   | Data Primer<br><i>Primary Data</i>         | Persepsi Dunia Usaha<br><i>Business Community Perceptions</i>                          |
| 15                                                                               | Stabilitas Politik<br><i>Political Stability</i>                                                                           | Data Primer<br><i>Primary Data</i>         | Persepsi Dunia Usaha<br><i>Business Community Perceptions</i>                          |
| 16                                                                               | Intensitas Unjuk Rasa<br><i>Intensity of Demonstrations</i>                                                                | Data Primer<br><i>Primary Data</i>         | Persepsi Dunia Usaha<br><i>Business Community Perceptions</i>                          |

| NO.                                                                       | FAKTOR - VARIABEL - INDIKATOR<br>FACTOR - VARIABLE - INDICATOR                                                                            | JENIS DATA<br>TYPE OF DATA             | SUMBER DATA<br>SOURCE OF DATA                                                                                                       |
|---------------------------------------------------------------------------|-------------------------------------------------------------------------------------------------------------------------------------------|----------------------------------------|-------------------------------------------------------------------------------------------------------------------------------------|
| <b>3. Variabel Budaya Masyarakat/Local Culture Variable</b>               |                                                                                                                                           |                                        |                                                                                                                                     |
| 17                                                                        | Keterbukaan Masyarakat terhadap Dunia Usaha<br><i>Openness of the Public toward the Business Community</i>                                | Data Primer<br><i>Primary Data</i>     | Persepsi Dunia Usaha<br><i>Business Community Perceptions</i>                                                                       |
| 18                                                                        | Non Diskriminasi (Perlakuan yang sama terhadap semua orang tanpa melihat perbedaan yang ada)<br><i>Non-Discriminatory Public Behavior</i> | Data Primer<br><i>Primary Data</i>     | Persepsi Dunia Usaha<br><i>Business Community Perceptions</i>                                                                       |
| 19                                                                        | Adat Istiadat Masyarakat Daerah<br><i>Local Community Traditions</i>                                                                      | Data Primer<br><i>Primary Data</i>     | Persepsi Dunia Usaha<br><i>Business Community Perceptions</i>                                                                       |
| 20                                                                        | Etos Kerja Masyarakat Daerah<br><i>Work Ethic of the Local Community</i>                                                                  | Data Primer<br><i>Primary Data</i>     | Persepsi Dunia Usaha<br><i>Business Community Perceptions</i>                                                                       |
| <b>C. FAKTOR EKONOMI DAERAH/REGIONAL ECONOMY FACTOR</b>                   |                                                                                                                                           |                                        |                                                                                                                                     |
| <b>1. Variabel Potensi Ekonomi/Economic Potential Variable</b>            |                                                                                                                                           |                                        |                                                                                                                                     |
| 21                                                                        | PDRB Perkapita<br><i>Per Capita GRDP</i>                                                                                                  | Data Sekunder<br><i>Secondary Data</i> | PDRB Perkapita Kab./Kota Tahun 2003<br><i>Regency/City per capita GRDP, 2003</i>                                                    |
| 22                                                                        | Laju Pertumbuhan PDRB<br><i>GRDP Growth Rate</i>                                                                                          | Data Sekunder<br><i>Secondary Data</i> | PDRB Kab./Kota atas Dasar Harga Konstan Tahun 1999 s/d 2003<br><i>Regency/City GRDP Based on Constant Prices, 1999 through 2003</i> |
| 23                                                                        | IPM (Indeks Pembangunan Manusia)<br><i>HDI (Human Development Index)</i>                                                                  | Data Sekunder<br><i>Secondary Data</i> | IPM Kab./ Kota Tahun 2002<br><i>Regency/City HDI, 2002</i>                                                                          |
| <b>2. Variabel Struktur Ekonomi/Economic Structure Variable</b>           |                                                                                                                                           |                                        |                                                                                                                                     |
| 24                                                                        | Nilai Tambah Sektor Primer<br><i>Added Value of Primary Sector</i>                                                                        | Data Sekunder<br><i>Secondary Data</i> | PDRB Kab./Kota Atas Dasar Harga Berlaku Tahun 2003<br><i>Regency/City GRDP Based on Prevailing Prices, 2003</i>                     |
| 25                                                                        | Nilai Tambah Sektor Sekunder<br><i>Added Value of Secondary Sector</i>                                                                    | Data Sekunder<br><i>Secondary Data</i> | PDRB Kab./Kota Atas Dasar Harga Berlaku Tahun 2003<br><i>Regency/City GRDP Based on Prevailing Prices, 2003</i>                     |
| 26                                                                        | Nilai Tambah Sektor Tersier<br><i>Added Value of Tertiary Sector</i>                                                                      | Data Sekunder<br><i>Secondary Data</i> | PDRB Kab./Kota Atas Dasar Harga Berlaku Tahun 2003<br><i>Regency/City GRDP Based on Prevailing Prices, 2003</i>                     |
| <b>D. FAKTOR KETENAGAKERJAAN/LABOUR FACTOR</b>                            |                                                                                                                                           |                                        |                                                                                                                                     |
| <b>1. Variabel Ketersediaan Tenaga Kerja/Labour Availability Variable</b> |                                                                                                                                           |                                        |                                                                                                                                     |
| 27                                                                        | Rasio Jumlah Penduduk Usia Produktif terhadap Jumlah Penduduk                                                                             | Data Sekunder                          | BPS Pusat : Sakernas Tahun 2003                                                                                                     |

| NO.                                                                                       | FAKTOR - VARIABEL - INDIKATOR<br>FACTOR - VARIABLE - INDICATOR                                         | JENIS DATA<br>TYPE OF DATA          | SUMBER DATA<br>SOURCE OF DATA                                                                                                                                                 |
|-------------------------------------------------------------------------------------------|--------------------------------------------------------------------------------------------------------|-------------------------------------|-------------------------------------------------------------------------------------------------------------------------------------------------------------------------------|
| 27                                                                                        | <i>Ratio of Residents of Productive Age to Total Residents</i>                                         | <i>Secondary Data</i>               | <i>Central Statistical Agency: National Labour Force Survey, 2003</i>                                                                                                         |
| 28                                                                                        | Rasio Jumlah Tenaga Kerja Berpendidikan SLTP terhadap Jumlah Tenaga Kerja                              | Data Sekunder                       | BPS Pusat : Sakernas Tahun 2003                                                                                                                                               |
|                                                                                           | <i>Ratio of Junior-High-School-Educated Workers to Total Work Force</i>                                | <i>Secondary Data</i>               | <i>Central Statistical Agency: National Labour Force Survey, 2003</i>                                                                                                         |
| 29                                                                                        | Rasio Penduduk Pencari Kerja terhadap Jumlah Angkatan Kerja                                            | Data Sekunder                       | BPS Pusat : Sakernas Tahun 2003                                                                                                                                               |
|                                                                                           | <i>Ratio of Job Seekers to Total Work Force</i>                                                        | <i>Secondary Data</i>               | <i>Central Statistical Agency: National Labour Force Survey, 2003</i>                                                                                                         |
| <b>2. Variabel Biaya Tenaga Kerja/Labour Cost Variable</b>                                |                                                                                                        |                                     |                                                                                                                                                                               |
| 30                                                                                        | UMP/UMK                                                                                                | Data Sekunder                       | APINDO : Daftar UMP dan UMK Daerah Di Indonesia Tahun 2003                                                                                                                    |
|                                                                                           | <i>UMP [Provincial Minimum Wage]/ UMK [Regency/City Minimum Wage]</i>                                  | <i>Secondary Data</i>               | <i>APINDO (Indonesian Employers Association): List of UMP and UMK by Regions in Indonesia, 2003</i>                                                                           |
| 31                                                                                        | Upah Yang Diterima Pekerja                                                                             | Data Sekunder                       | BPS Pusat : Sakernas Tahun 2003                                                                                                                                               |
|                                                                                           | <i>Wages Received by Workers</i>                                                                       | <i>Secondary Data</i>               | <i>Central Statistical Agency: National Labour Force Survey, 2003</i>                                                                                                         |
| <b>3. Variabel Produktivitas dan Kualitas TK/Labour Productivity and Quality Variable</b> |                                                                                                        |                                     |                                                                                                                                                                               |
| 32                                                                                        | Produktivitas (Rasio Nilai Tambah Sektor Manufaktur terhadap Jumlah Tenaga Kerja Manufaktur)           | Data Sekunder                       | BPS Pusat dan Daerah : PDRB Atas Harga Konstan Tahun 2003, Sakernas Tahun 2003                                                                                                |
|                                                                                           | <i>Productivity (Ratio of Added Value of Manufacturing Sector to Total Manufacturing Labour Force)</i> | <i>Secondary Data</i>               | <i>Central and Regional Statistical Agencies: GRDP Based on Constant 2003 Prices, National Labour Force Survey, 2003</i>                                                      |
| <b>E. FAKTOR INFRASTRUKTUR/INFRASTRUCTURE FACTOR</b>                                      |                                                                                                        |                                     |                                                                                                                                                                               |
| <b>1. Variabel Ketersediaan Infrastruktur /Availability of Infrastructure Variable</b>    |                                                                                                        |                                     |                                                                                                                                                                               |
| 33                                                                                        | Ketersediaan Jalan                                                                                     | Data Primer & Sekunder              | Data Primer : Persepsi Pelaku Usaha;<br>Data Sekunder : BPS Daerah / BPS Pusat : Kab/Kota dan Prop Dalam Angka                                                                |
|                                                                                           | <i>Availability of Roads</i>                                                                           | <i>Primary &amp; Secondary Data</i> | <i>Primary Data: Perceptions of Business Operators; Secondary Data: Regional Statistical Agencies / Central Statistical Agency: Regencies/Cities and Provinces In Figures</i> |
| 34                                                                                        | Ketersediaan Pelabuhan Laut                                                                            | Data Primer & Sekunder              | Data Primer : Persepsi Pelaku Usaha;<br>Data Sekunder : BPS Daerah / BPS Pusat : Kab/Kota dan Prop DI dalam Angka                                                             |
|                                                                                           | <i>Availability of Sea Ports</i>                                                                       | <i>Primary &amp; Secondary Data</i> | <i>Primary Data: Perceptions of Business Operators; Secondary Data: Regional Statistical Agencies / Central Statistical Agency: Regencies/Cities and Provinces In Figures</i> |

| NO.                                                                         | FAKTOR - VARIABEL - INDIKATOR<br>FACTOR - VARIABLE - INDICATOR | JENIS DATA<br>TYPE OF DATA          | SUMBER DATA<br>SOURCE OF DATA                                                                                                                                                 |
|-----------------------------------------------------------------------------|----------------------------------------------------------------|-------------------------------------|-------------------------------------------------------------------------------------------------------------------------------------------------------------------------------|
| 35                                                                          | Ketersediaan Pelabuhan Udara                                   | Data Primer & Sekunder              | Data Primer : Persepsi Pelaku Usaha;<br>Data Sekunder : BPS Daerah / BPS Pusat<br>: Kab/Kota dan Prop Dlm Angka                                                               |
|                                                                             | <i>Availability of Airports</i>                                | <i>Primary &amp; Secondary Data</i> | <i>Primary Data: Perceptions of Business Operators; Secondary Data: Regional Statistical Agencies / Central Statistical Agency: Regencies/Cities and Provinces In Figures</i> |
| 36                                                                          | Ketersediaan Saluran (sambungan) Telpon                        | Data Primer & Sekunder              | Data Primer : Persepsi Pelaku Usaha;<br>Data Sekunder : BPS Daerah / BPS Pusat<br>: Kab/Kota dan Prop Dlm Angka                                                               |
|                                                                             | <i>Availability of Telephone Lines (Connections)</i>           | <i>Primary &amp; Secondary Data</i> | <i>Primary Data: Perceptions of Business Operators; Secondary Data: Regional Statistical Agencies / Central Statistical Agency: Regencies/Cities and Provinces In Figures</i> |
| 37                                                                          | Ketersediaan Saluran (sambungan) Listrik                       | Data Primer & Sekunder              | Data Primer : Persepsi Pelaku Usaha;<br>Data Sekunder : BPS Daerah / BPS Pusat<br>: Kab/Kota dan Prop Dlm Angka                                                               |
|                                                                             | <i>Availability of Electricity Lines (Connections)</i>         | <i>Primary &amp; Secondary Data</i> | <i>Primary Data: Perceptions of Business Operators; Secondary Data: Regional Statistical Agencies / Central Statistical Agency: Regencies/Cities and Provinces In Figures</i> |
| <b>2. Variabel Kualitas Infrastruktur / Infrastructure Quality Variable</b> |                                                                |                                     |                                                                                                                                                                               |
| 38                                                                          | Kualitas Jalan                                                 | Data Primer & Sekunder              | Data Primer : Persepsi Pelaku Usaha;<br>Data Sekunder : BPS Daerah / BPS Pusat<br>: Kab/Kota dan Prop Dlm Angka                                                               |
|                                                                             | <i>Quality of Roads</i>                                        | <i>Primary &amp; Secondary Data</i> | <i>Primary Data: Perceptions of Business Operators; Secondary Data: Regional Statistical Agencies / Central Statistical Agency: Regencies/Cities and Provinces In Figures</i> |
| 39                                                                          | Akses & Tipe Pelabuhan Laut                                    | Data Primer & Sekunder              | Data Primer : Persepsi Pelaku Usaha;<br>Data Sekunder : BPS Daerah / BPS Pusat<br>: Kab/Kota dan Prop Dlm Angka                                                               |
|                                                                             | <i>Access to and Types of Seaports</i>                         | <i>Primary &amp; Secondary Data</i> | <i>Primary Data: Perceptions of Business Operators; Secondary Data: Regional Statistical Agencies / Central Statistical Agency: Regencies/Cities and Provinces In Figures</i> |
| 40                                                                          | Akses & Tipe Pelabuhan Udara                                   | Data Primer & Sekunder              | Data Primer : Persepsi Pelaku Usaha;<br>Data Sekunder : BPS Daerah / BPS Pusat<br>: Kab/Kota dan Prop Dlm Angka                                                               |
|                                                                             | <i>Access to and Types of Airports</i>                         | <i>Primary &amp; Secondary Data</i> | <i>Primary Data: Perceptions of Business Operators; Secondary Data: Regional Statistical Agencies / Central Statistical Agency: Regencies/Cities and Provinces In Figures</i> |

| NO. | FAKTOR - VARIABEL - INDIKATOR<br>FACTOR - VARIABLE - INDICATOR | JENIS DATA<br>TYPE OF DATA          | SUMBER DATA<br>SOURCE OF DATA                                                                                                                                                 |
|-----|----------------------------------------------------------------|-------------------------------------|-------------------------------------------------------------------------------------------------------------------------------------------------------------------------------|
| 41  | Kualitas Sambungan Telpon                                      | Data Primer & Sekunder              | Data Primer : Persepsi Pelaku Usaha;<br>Data Sekunder : BPS Daerah / BPS Pusat<br>: Kab/Kota dan Prop Dlm Angka                                                               |
|     | <i>Quality of Telephone Connections</i>                        | <i>Primary &amp; Secondary Data</i> | <i>Primary Data: Perceptions of Business Operators; Secondary Data: Regional Statistical Agencies / Central Statistical Agency: Regencies/Cities and Provinces In Figures</i> |
| 42  | Kualitas Suplai Listrik                                        | Data Primer & Sekunder              | Data Primer : Persepsi Pelaku Usaha;<br>Data Sekunder : BPS Daerah / BPS Pusat<br>: Kab/Kota dan Prop Dlm Angka                                                               |
|     | <i>Quality of Electricity Supply</i>                           | <i>Primary &amp; Secondary Data</i> | <i>Primary Data: Perceptions of Business Operators; Secondary Data: Regional Statistical Agencies / Central Statistical Agency: Regencies/Cities and Provinces In Figures</i> |

## B.2. Pengumpulan Data

### B.2.1. Teknik Pengumpulan Data

#### (1) Pengumpulan data sekunder (*existing statistic*).

Dilakukan dengan mengumpulkan data-data statistik daerah yang berasal dari berbagai laporan yang diberikan oleh lembaga pemerintah (seperti BPS, BI, Depdagri, Pemda, dan lain-lain), serta berbagai laporan penelitian sebelumnya.

#### (2) Data Bobot Faktor, Variabel, dan Indikator.

Bobot pengaruh masing-masing faktor, variabel, dan indikator terhadap daya tarik investasi suatu daerah bervariasi / berbeda. Agar dapat dilakukan perbandingan dan perkembangan hasil pemeringkatan dari tahun ke tahun, untuk pemeringkatan tahun 2004 ini masih menggunakan hasil pembobotan tahun 2002 (sama halnya dengan pemeringkatan tahun 2003). Data pembobotan masing-masing faktor, variabel dan indikator dilakukan melalui wawancara secara langsung dengan bantuan kuesioner *The Analytic Hierarchy Process* (AHP) kepada 2 sampai dengan 3 orang responden pengusaha daerah di setiap daerah penelitian dari 20 daerah penelitian, dan 8 orang pengusaha nasional, serta 3 orang pengamat ekonomi dari Jakarta.

## B.2. Data Collection

### B.2.1. Data Collection Techniques

#### (1) Collection of data in the form of existing statistics

(*secondary data*). Done by collecting regional statistical data derived from various reports provided by government institutions (Central Statistical Bureau (BPS), Bank Indonesia, Department of the Interior, Regional Governments, etc.), and previous research reports.

#### (2) Data on Weighting of Factors, Variables, and Indicators.

The weightings for the influence of the respective factors, variables, and indicators on the investment attractiveness of a region vary. To allow for comparison and development of the rating results from year to year, the 2004 ratings used the same weighting results as were used in 2002 (and in 2003). The weighting factors for the respective factors, variables and indicators were determined through face-to-face interviews using an *Analytic Hierarchy Process* (AHP) questionnaire of two to three business operator respondents in each of twenty research regions, eight national-scale business operators, and three economics experts from Jakarta.



(3) **Pengumpulan data persepsi dunia usaha tentang daya tarik investasi daerah** dilakukan dengan survei melalui wawancara langsung dengan menggunakan kuesioner yang dirumuskan secara terstruktur dan sistematis. Responden untuk penelitian ini adalah para pelaku usaha di setiap daerah penelitian yang representatif sehingga memungkinkan data yang diisi dalam kuesioner merupakan suatu data yang telah mempunyai nilai obyektivitas yang tinggi sesuai dengan pengetahuan / pengertian/ kepercayaan individu tentang obyek sikap (*kognitif*) karena pengalaman, lamanya seseorang mengalami aktivitas (bekerja) atau menghadapi persoalan yang diteliti.

(4) **Metode Sampling.** Mengingat keterbatasan ketersediaan daftar perusahaan atau pelaku usaha yang berada di tiap daerah penelitian, penentuan responden dilakukan dengan *purposive sampling*. Daftar perusahaan atau pelaku usaha di tiap daerah tetap digunakan sebagai salah satu pertimbangan untuk memilih dan mencari responden yang akan diwawancarai. Secara umum penentuan responden dan proporsinya di tiap daerah didasarkan pada kriteria sebagai berikut :

- Kalangan dunia usaha yang mewakili perusahaan yang bergerak di bidang, Perkebunan, Kehutanan, Peternakan, Perikanan, Pertambangan, Industri Pengolahan (Manufaktur), dan Perdagangan (tergantung dari keterwakilan karakteristik masing-masing daerah),
- Mewakili perusahaan skala kecil, sedang, dan besar, berdasarkan modal usaha/jumlah tenaga kerja.
- Perusahaan yang berasal dari daerah yang bersangkutan (investor daerah setempat), dan perusahaan yang berasal dari luar daerah (cabang perusahaan, investor dari luar daerah, PMA, dan lain sebagainya);

(5) Penelitian lapangan dilakukan dalam kurun waktu 2 (dua) bulan yakni dari Agustus sampai dengan awal November 2004. Jumlah responden pelaku usaha (baik pemilik usaha maupun pengelola usaha level manager) yang

(3) *Collection of data on business community perceptions regarding regional investment attractiveness was done through a face-to-face interview survey using a questionnaire that was formulated in a structured and systematic way. The respondents in this research were business operators in each research region who were sufficiently representative to enable the data entered into the questionnaires to be data with a high level of objectivity in line with the individuals' knowledge/ understanding/ beliefs regarding the cognitive objects, based on experience, i.e. the length of time the person had been working or facing the issues being investigated.*

(4) **Sampling Methods.** *Given the limited availability of lists of companies or business operators in each research region, respondents were selected through purposive sampling. A list of companies or business operators in each region was still used as one consideration for selecting and seeking the respondents to be interviewed. Generally, the determination of the respondents and their proportions in each region were based on the following criteria:*

- *Business community circles representing companies operating in the sectors of Plantations, Forestry, Livestock, Fisheries, Mining, Processing Industry (Manufacturing), and Trade (depending on the characteristics of their representation in each region),*
- *Representing small, medium-scale, and large companies, based on business capital/ number of employees.*
- *Companies originally from the regions concerned (local investors), and companies from outside the regions (company branches, investors from outside the regions, foreign investment, etc.);*

(5) *The field research was conducted over a period of two (2) months, from August to early November 2004. The number of business operator respondents (both business owners and manager level) that were interviewed was 5,246 persons, spread throughout*

berhasil diwawancari sebanyak 5.246 orang, tersebar di 214 daerah Kabupaten dan Kota di Indonesia, atau rata-rata 25 responden di setiap daerah. Pengumpulan data melibatkan kurang lebih 230 interviewer dari 214 daerah penelitian.

*214 regencies and cities in Indonesia, or an average of 25 respondents in each region. The data collection involved around 230 interviewers in the 214 research regions.*

### B.2.2. Profil Responden

Gambaran responden yang berhasil diwawancari adalah sebagai berikut :

### B.2.2. Respondent Profile

*The profile of the respondents who were interviewed is as follows:*

**Tabel/Table. 3**  
**Profil Responden/Respondent Profile**

#### 1. Berdasarkan Bidang Usaha/ Sektor Kegiatan Usaha/By Business Sector

| Bidang Usaha/<br>Business Sector          | Frekuensi/<br>Frequency | Persen /<br>Percentage (%) |
|-------------------------------------------|-------------------------|----------------------------|
| Tidak Jawab/No response                   | 15                      | 0, 29                      |
| Manufaktur/Manufacturing                  | 1.128                   | 21, 50                     |
| Pertambangan/Mining                       | 67                      | 1, 28                      |
| Perkebunan/Plantations                    | 168                     | 3, 20                      |
| Perdagangan dan Jasa/Trading and Services | 3.362                   | 64, 09                     |
| Pertanian Pangan/Food Agriculture         | 113                     | 2, 15                      |
| Kehutanan/Forestry                        | 33                      | 0, 63                      |
| Perikanan/Fisheries                       | 124                     | 2, 36                      |
| Lainnya/Other                             | 236                     | 4, 50                      |
| <b>Total</b>                              | <b>5.246</b>            | <b>100</b>                 |

#### 2. Berdasarkan Jumlah Tenaga Kerja Kegiatan Usaha yang Dilakukan/ By Number of Workers in the Business :

| Jumlah Tenaga Kerja/<br>Number of Workers                                    | Frekuensi/<br>Frequency | Persen /<br>Percentage (%) |
|------------------------------------------------------------------------------|-------------------------|----------------------------|
| Tidak Jawab/No response                                                      | 254                     | 4, 84                      |
| s/d 19 orang (Persh. Kecil)/Up to 19 persons (Small Business)                | 3.571                   | 68, 07                     |
| 20 s/d 100 orang (Persh. Menengah)/ 20 to 100 persons (Medium-Scale Company) | 1.081                   | 20, 61                     |
| > 100 orang (Persh. Besar)/> 100 persons (Large Company)                     | 340                     | 6, 48                      |
| <b>Total</b>                                                                 | <b>5.246</b>            | <b>100</b>                 |

### B.3. Pengolahan Data dan Analisis Data

#### B.3.1. Pembobotan Faktor, Variabel, dan Indikator

Bobot faktor, variabel, dan indikator, yang digunakan sebagai dasar menentukan skor daya tarik tiap daerah untuk pemeringkatan tahun 2004 menggunakan hasil pembobotan yang digunakan pada pemeringkatan tahun 2002-2003. Hal ini dimaksudkan agar dapat memper-bandingkan hasil pemeringkatan dari tahun ke tahun. Dengan demikian akan dapat dilihat perubahan indikator-indikator pemeringkatan tiap daerah.

### B.3. Data Processing and Data Analysis

#### B.3.1. Weighting of Factors, Variables, and Indicators

*The weightings of the factors, variables, and indicators used as the basis for determining the attractiveness scores for each region in the 2004 ratings were the same weightings that were used in the ratings for 2002 and 2003. This was to enable year-to-year comparisons of the ratings. Thus, changes in the rating indicators for each region can also easily be seen.*

Bobot Faktor, Variabel, dan Indikator Pemeringkatan diperoleh dengan menggunakan metode AHP (*The Analytic Hierarchy Process*) dengan bantuan perangkat lunak yang disebut 'Expert Choice'. Prinsip metode AHP adalah memberikan bobot tiap faktor, variabel, dan indikator dengan perbandingan antar faktor, variabel, indikator satu dengan lainnya. Bobot yang lebih besar dari suatu indikator, menunjukkan indikator yang lebih penting dibandingkan indikator lainnya dalam menentukan daya tarik investasi suatu daerah. Peralatan utama dari model ini adalah sebuah hirarki fungsional dengan input utamanya persepsi manusia. Hasil Pembobotan Faktor, Variabel dan Indikator, secara lengkap dapat dilihat pada *Diagram Bobot Faktor, Variabel, Indikator, Intensitas Pemeringkatan* berikut :

*The weights of the Rating Factors, Variables, and Indicators were obtained using the Analytic Hierarchy Process (AHP) method with the assistance of a software program called "Expert Choice". The principle of the AHP method is to give a weighting to each factor, variable, and indicator by comparing each factor, variable, or indicator with each other factor, variable, or indicator. A greater weight for a given indicator indicates that that indicator is more important than the other indicators in determining the investment attractiveness of a region. The main tool in this model is a functional hierarchy, the main input of which is human perceptions. The complete results of the Factor, Variable and Indicator Weightings can be seen in the following Figure, "Weightings of Factors, Variables, Indicators, and Intensity of Ratings".*

### **Bobot Faktor; Variabel; Indikator Pemeringkatan** *Weighting of Rating Factors, Variables and Indicators*

**Diagram/Figure 2.**

#### **Bobot Faktor Pemeringkatan/Weight of Rating Factors**

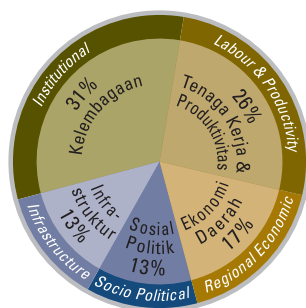

- Infrastruktur Fisik / *Physical Infrastructure* : **13%**
- Sosial Politik / *Socio Political* : **26%**
- Ekonomi Daerah / *Regional Economic Dynamism* : **17%**
- Tenaga Kerja & Produktivitas / *Labour & Productivity* : **13%**
- Kelembagaan/*Institutional* : **31%**

**Diagram/Figure 3.**

#### **Faktor Kelembagaan/Institutional Factors**

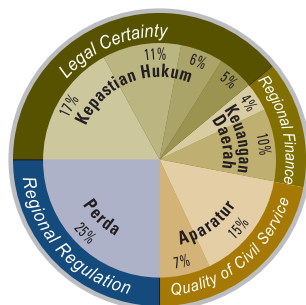

- Variabel Kepastian Hukum /*Legal Certainty* : **39 %**
  - Penegakan Hukum/*Law Enforcement* : **17 %**
  - Konsistensi Peraturan/*Legal Consistency* : **11 %**
  - Pungli di Luar Birokrasi/*Extortion/Criminal Activity* : **6 %**
  - Hubungan Eksekutif-Legislatif/*Executive-Lagislative Relation* : **5 %**
- Variabel Keuangan Daerah /*Regional Finance* : **14 %**
  - Anggaran Pembangunan/*Development Budget* : **4 %**
  - Rasio Retribusi-Pajak/*Ratio of Retribution-Tax* : **10 %**
- Variabel Aparatur /*Quality of Civil Service* : **22 %**
  - Penggunaan Wewenang/*Use of Authority* : **15 %**
  - Pelayanan Birokrasi/*Quality of Civil Service* : **7 %**
- Variabel Perda/Indikator Perda/*Regional Policy/Regional Regulation* : **25 %**
  - Perda/*Regional Regulation* : **25%**

**Diagram/Figure 4.****Faktor Sosial Politik/Socio-Political Factors**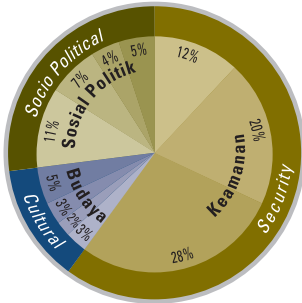

- Variabel Sosial Politik /Socio-Political : **27%**
  - Stabilitas Politik/*Political Stability* : **11%**
  - Konflik Masyarakat/*Social Conflict* : **7%**
  - Unjuk Rasa/*Strike* : **4%**
  - Partisipasi Masyarakat/*Public Participation* : **5%**
- Variabel Keamanan /*Security*: **60%**
  - Gangguan Masyarakat/*Disturbance of Society*: **12%**
  - Gangguan Usaha/*Disturbance of Business* : **20%**
  - Kecepatan Aparat/*Speed of Security Officer* : **28%**
- Variabel Budaya /*Cultural* : **13%**
  - Keterbukaan/*Openness* : **3%**
  - Non Diskriminatif/*Non Discrimination* : **2%**
  - Adat Istiadat/*Custom and Tradition* : **3%**
  - Etos Kerja/*Working Ethos* : **5%**

**Diagram/Figure 5.****Faktor Ekonomi Daerah/Regional Economic Dynamism**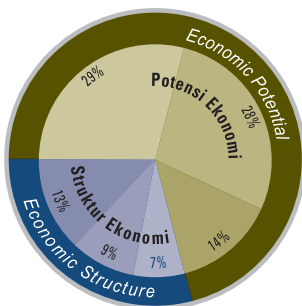

- Variabel Potensi Ekonomi/*Economic Potential* : **71%**
  - PDRB Perkapita/*GRDP Per Capita* : **29%**
  - Pertumbuhan/*Growth* : **28%**
  - Indeks Pembangunan Manusia/*Human Development Index* : **14%**
- Variabel Struktur Ekonomi/*Economic Structure* : **29%**
  - Nilai Tambah Tersier/*Added Value-Tertier* : **7%**
  - Nilai Tambah Sekunder/*Added Value-Secondary* : **9%**
  - Nilai Tambah Primer/*Added Value-Primary* : **13%**

**Diagram/Figure 6.****Faktor Tenaga Kerja & Produktivitas/Labour & Productivity**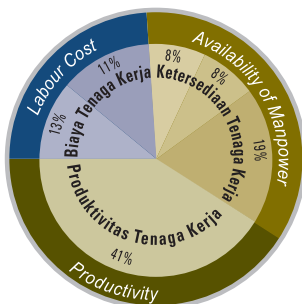

- Variabel Biaya Tenaga Kerja/*Labour Cost* : **24%**
  - Upah Aktual/*Actual Wage* : **13%**
  - UMP/*Normative Wage* : **11%**
- Variabel Ketersediaan TK/*Availability of Manpower* : **35%**
  - SLTP Berpengalaman/*Skilled Labour* : **8%**
  - Usia Produktif/*Productive Age* : **8%**
  - Pencari Kerja/*Job Seeker* : **19%**
- Variabel Produktivitas Tenaga Kerja/*Productivity of Labour* : **41%**
  - Produktivitas/*Productivity* : **41%**

**Diagram/Figure 7.**  
**Faktor Infrastruktur Fisik/Physical Infrastructure**

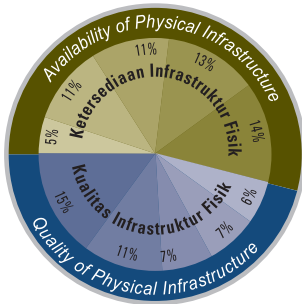

- Variabel Ketersediaan Infrastruktur Fisik/  
*Availability of Physical Infrastructure* : **54%**
  - Pelabuhan Udara/Airport : **5%**
  - Pelabuhan Laut/Seaport : **11%**
  - Jalan/Road : **11%**
  - Telepon/Telephone : **13%**
  - Listrik/Electricity : **14%**
- Variabel Kualitas Infrastruktur Fisik/*Quality of Physical Infrastructure* : **46%**
  - Kualitas Pelabuhan Udara/Quality of Airport : **6%**
  - Kualitas Pelabuhan Laut/Quality of Seaport : **7%**
  - Kualitas Jalan/Quality of Road : **7%**
  - Kualitas Telepon/Quality of Telephone : **11%**
  - Kualitas Listrik/Quality of Electricity : **15%**

### B.3.2. Klasifikasi Intensitas Tiap Indikator

Sebelum diolah dengan ‘*expert choice*’, setiap indikator baik yang berasal dari data primer maupun sekunder diklasifikasikan untuk memperoleh intensitas masing-masing.

- Data-data primer yang diperoleh dari kuesioner persepsi responden dari 214 daerah diolah dengan bantuan SPSS atau Exel sehingga diperoleh tabulasi yang menunjukkan intensitas tiap-tiap indikator pemeringkatan. Intensitas tersebut berupa skala *likert* 1 sampai dengan 5 yang menunjukkan ukuran dari kondisi yang paling buruk sampai kondisi yang paling baik.
- Indikator-indikator kuantitatif berupa data sekunder (*existing statistik data*), masing-masing juga diklasifikasikan dengan menggunakan ‘*metode rata-rata*’ dan ‘*metode distribusi*’ sehingga diperoleh intensitasnya ke dalam skala *likert* yang sama.

### B.3.2. Intensity Classification of Each Indicator

*Before being processed using Expert Choice, each indicator, whether derived from primary or from secondary data, was classified to obtain its respective intensity.*

- *Primary data obtained from questionnaires on perceptions of respondents from the 214 regions were processed with the aid of SPSS or Excel in order to obtain a tabulation showing the intensity of each rating indicator. These intensities were expressed in the form of a Likert scale rating from 1 to 5 showing a measurement of conditions, from worst to best.*
- *Quantitative indicators in the form of secondary data (existing statistical data) were also each classified using the “average method” and the “distribution method” in order to obtain their intensities using the same Likert scale.*

### B.3.3. Penentuan Nilai Intensitas Tiap Indikator dan Peringkat

Intensitas masing-masing indikator diolah dengan perangkat lunak ‘*expert choice*’ berdasar hirarki dan bobot pemeringkatan yang telah

### B.3.3. Determining the Intensity Value of Each Indicator and Rating

*The intensity of each indicator was processed using Expert Choice software based on the previously established rating hierarchy and weightings. This*

ditentukan sebelumnya. Olahan perangkat lunak tersebut menghasilkan nilai masing-masing indikator yang secara kumulatif membentuk urutan peringkat nilai dari yang tertinggi sampai yang terendah diantara 214 daerah pemeringkatan. Daftar intensitas tiap-tiap Indikator secara lengkap dapat dilihat pada *Lampiran 10.A - 15.3.B : Hasil Klasifikasi Indikator Pemeringkatan*.

*software processing produced values for each indicator that cumulatively formed a sequence of ratings from the highest to the lowest among the 214 rating regions. The complete list of intensities of the indicators can be seen in the Appendix 10.A - 15.3.B : Result of Classification of Rating Indicators.*



---

## IV. Daya Tarik Investasi 214 Kabupaten/Kota di Indonesia Tahun 2004

### *Investment Attractiveness of 214 Regencies/Cities in Indonesia, 2004*

Dari pemeringkatan tahun 2002 hingga tahun 2004, jumlah daerah yang diperingkat terus bertambah. Pada tahun 2002 daerah yang diperingkat sebanyak 134 daerah (97 Kabupaten dan 37 Kota); tahun 2003 sebanyak 200 daerah (156 Kabupaten dan 44 Kota); sementara untuk tahun 2004 daerah yang diperingkat bertambah menjadi 214 (161 Kabupaten dan 53 Kota). Seiring dengan berjalannya waktu, hasil pemeringkatan dari tahun ke tahun juga mengalami perubahan. Beberapa daerah mengalami peningkatan peringkat, sebagian mengalami penurunan, dan yang lainnya berhasil mempertahankan posisinya secara relatif. Perubahan peringkat dari tahun ke tahun ini menunjukkan adanya dinamika yang terjadi di daerah-daerah yang diperingkat. Tidak dipungkiri bahwa penambahan jumlah daerah turut andil dalam perubahan posisi peringkat daya tarik investasi suatu daerah secara relatif dibandingkan dengan daerah lainnya.

#### A. PERINGKAT 161 KABUPATEN DAN PERINGKAT 53 KOTA DI INDONESIA

Seperti tahun 2003, hasil pemeringkatan Daya Tarik Investasi 214 Daerah tahun 2004 ini dibuat secara terpisah antara Daerah Kabupaten dan

*Between 2002 and 2004, the number of regions rated steadily rose. In 2002, 134 regions were rated (97 regencies and 37 cities); in 2003, 200 regions (156 regencies and 44 cities); and in 2004 the number of regions rated was increased to 214 (161 regencies and 53 cities). In line with the passage of time, the results of the ratings have also changed from year to year. Some regions' ratings have risen, some others' have fallen, and others have managed to maintain relatively steady ratings. These changes in ranking from year to year indicate the dynamics occurring in the regions that are rated. It is undeniable that the increase in the number of regions has played a part in the changes in regions' rating positions for investment attractiveness relative to other regions.*

#### A. RANKINGS OF 161 REGENCIES AND 53 CITIES IN INDONESIA

*As in 2003, the Investment Attractiveness rankings for the 214 Regions for 2004 are presented separately for Regencies and for Cities. Unlike last year, the*



Daerah Kota. Hasil pemeringkatan tidak ditampilkan secara urutan dari peringkat tertinggi hingga terendah, tetapi ditampilkan dengan pengelompokan nilai yang diperoleh. Pengelompokan dilakukan dengan mengelompokkan daerah-daerah yang memperoleh nilai daya tarik investasi tinggi hingga kelompok daerah-daerah yang memiliki nilai daya tarik investasi rendah. Untuk itu dibuat 5 kelompok peringkat, yaitu kelompok A, B, C D, dan E. Secara berurutan, kelompok peringkat A adalah untuk daerah dengan daya tarik investasi tinggi, hingga kelompok E untuk daerah dengan daya tarik investasi rendah. Khusus untuk kelompok A dan kelompok B, masing-masing dibagi lagi menjadi 3 kelompok, yakni A\*\*\*; A\*\*; A\* dan B\*\*\*; B\*\*; dan B\*. Pengelompokan seperti ini didasarkan pertimbangan bahwa perbedaan satu peringkat dengan peringkat dibawah atau di atasnya sangat kecil atau tidak signifikan.

#### A.1. Peringkat Berdasarkan Kriteria Umum

Secara umum terjadi perubahan yang cukup signifikan pada hasil pemeringkatan tahun 2004, dibandingkan dengan tahun 2003 dan 2002. Dilihat dari rata-rata skor yang berhasil diraih oleh 161 kabupaten di tahun 2004 adalah sebesar 0,2007 atau mengalami peningkatan sebesar 0,0354 poin dibandingkan pada tahun 2003 yaitu sebesar 0,1553 point. Hal ini dapat diartikan bahwa secara rata-rata iklim investasi kabupaten-kabupaten di Indonesia pada tahun 2004 mengalami perbaikan dibandingkan pada tahun sebelumnya, dan terjadi persaingan yang semakin ketat diantara daerah-daerah dalam menarik investasi.

*rankings are not presented simply in a rank order from highest to lowest; instead, they are presented by groupings, or "clusters," of the scores obtained. This was done by grouping together the regions that received high investment attractiveness scores, down to the group of regions that had low investment attractiveness scores. Five clusters were thereby produced, clusters A, B, C D, and E. Cluster A is the group of regions with the highest investment attractiveness, while cluster E is those with the lowest investment attractiveness. Within group A and group B, each group is further divided into three subgroups: A\*\*\*; A\*\*; A\* and B\*\*\*; B\*\*; and B\*. It was decided to present the ranking in this way because the difference in numerical ranking was in many cases too small to be significant.*

#### A.1. Rankings Based on General Criteria

*In general, there have been some quite significant changes in the ratings for 2004, compared with those for 2003 and 2002. The average score attained by the 161 regencies in 2004 was 0.2007, an increase of 0.0354 points compared with 2003's average score of 0.1553. This can be taken to mean that on average, the investment climate in the regencies in Indonesia showed an improvement over the previous year, and that there was increasingly sharp competition between regions to attract investment.*

**Tabel/Table. 4.a**  
**Rata-Rata Skor Peringkat Umum/Average Scores for General Ratings:**

|                                 | 2003   |   | 2004   |
|---------------------------------|--------|---|--------|
| Kab & Kota/Regencies and Cities | 0,1853 | ▶ | 0,2007 |
| Kota/Cities                     | 0,1943 | ▶ | 0,2172 |
| Kabupaten/Regencies             | 0,1828 | ▶ | 0,1925 |

Grafik 1., memperlihatkan statistik peringkat yang diperoleh Kota dan Kabupaten berdasarkan Kriteria Umum (Nilai Total). Terlihat bahwa daerah

*Graph 1 shows the statistics of the rankings achieved by cities and by regencies based on General Criteria (Overall Score). It can be seen that city regions have*

kota memiliki nilai yang lebih baik dari pada daerah kabupaten, terlihat dari lebih banyaknya persentase daerah perkotaan yang memiliki peringkat A dan B. Dari Grafik 1., juga memperlihatkan bahwa tidak satupun daerah Kota yang berada pada kelompok peringkat E, sebaliknya 3,1% Kabupaten berada pada kelompok peringkat E.

*better scores than regency regions, as seen from the greater percentages of urban regions with A and B rankings. Graph 1 also shows that not one city region is in ranking cluster E, while 3.1% of regencies fall into cluster E.*

**Grafik/Graph. 1.**  
**Statistik Kelompok Peringkat Berdasarkan Kategori Umum (Nilai Total)/**  
**Ranking Based on the Overall Score**

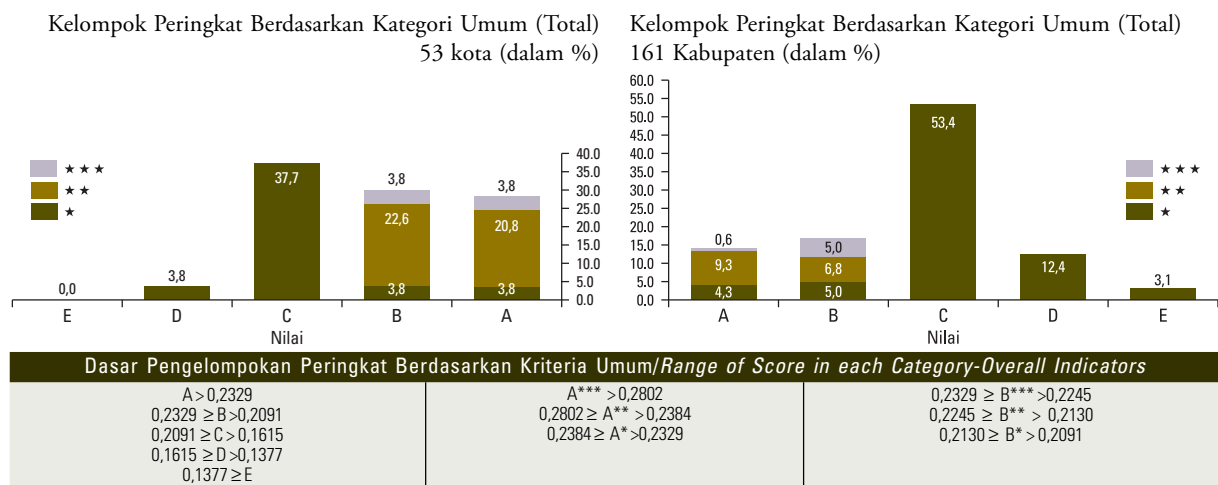

Tabel 4.b. Memperlihatkan daerah-daerah yang berada pada kelompok peringkat A (dari A<sup>\*\*\*</sup> hingga A<sup>\*</sup>) dan daerah-daerah yang berada pada kelompok peringkat E. Purwakarta merupakan satu-satunya daerah kabupaten yang memperoleh peringkat A<sup>\*\*\*</sup>.

Hasil yang diperoleh Kab. Purwakarta ini sedikit menurun dibandingkan dengan yang diperolehnya pada tahun 2003, namun demikian dia mampu mempertahankan peringkatnya di urutan pertama pada pemeringkatan daya tarik investasi secara umum. Beberapa indikator penting yang sedikit menurun pada iklim investasi di Kab. Purwakarta adalah pada indikator, pelayanan birokrasi dan penegakan hukum. Kabupaten ini berhasil memanfaatkan *endowment* yang dimilikinya dengan menerapkan kebijakan yang komprehensif, dan *responsive* terhadap pelaku usaha. Pertumbuhan ekonomi yang mencapai rata-rata 6,9% pertahun, dan daya beli masyarakat yang tinggi,

*Table 4.b. shows the regions that fall into cluster A (from A<sup>\*\*\*</sup> to A<sup>\*</sup>) and the regions in cluster E. Purwakarta is the only regency that obtained an A<sup>\*\*\*</sup> ranking.*

*The result obtained by Purwakarta Regency is in fact slightly lower than what it achieved in 2003; even so, the regency was able to maintain its first-place ranking in the general investment attractiveness ratings. Among the important indicators that indicated a slight decline in the investment climate in Purwakarta Regency were those of government services and law enforcement. This regency has been able to make good use of its endowments by applying comprehensive policies and being responsive to business operators. The economic growth, which reached an average of 6.9% per year, and the public's high buying power, indicate bright business prospects for the region. The availability of a competitive labor force and the guarantees of legal*

menggambarkan prospek bisnis cerah di daerah ini. Ketersediaan tenaga kerja yang kompetitif; dan jaminan kepastian hukum yang diberikan oleh pemda, membuat kabupaten ini sangat menarik untuk investasi. Keberhasilan Purwakarta menempati peringkat pertama pada tahun 2003, membuat ekspektasi publik pengusaha di sana menjadi lebih tinggi terhadap performa pelayanan yang diberikan oleh Pemda. Hal ini harus diwaspadai dan perlu mendapat perhatian serius dari jajaran Pemda Purwakarta jika ingin kembali meraih peringkat teratas, karena banyak daerah yang telah berbenah diri untuk menarik investasi ke daerahnya masing-masing.

Kota Kediri berhasil meraih peringkat A\*\*\* karena memperoleh skor tertinggi untuk beberapa faktornya. PDRB Perkapita yang mencapai sebesar Rp.87,3 juta, menjadikan penduduk kota ini memiliki daya beli tertinggi di Indonesia. Kantor Pelayanan Perizinan, mengakomodasi proses pengurusan ijin dalam satu tempat, dan dilakukan secara prima. Pelibatan masyarakat dalam setiap perumusan kebijakan pemda yang terlembaga dalam Forum Kota, membuat tata pemerintahannya menjadi transparan dan bertanggung gugat. Dengan didukung kualitas sumberdaya manusianya yang handal, kota ini sangat menarik bagi investasi.

*certainty provided by the regional government have made this regency very attractive for investment. Purwakarta's success in attaining the top ranking in 2003 further raised the expectations of the business community there regarding the performance of services provided by the regional government. This situation will require serious attention from the Purwakarta regional government if it wishes to win the top ranking yet again, because many other regional governments have now prepared themselves to attract investment to their respective regions.*

*The city of Kediri succeeded in achieving an A\*\*\* ranking because it received the highest score for several factors. Its per-capita GRDP of Rp.87.3 million gives the residents of this city the highest spending power in Indonesia. The Permitting Services Office accommodates permitting processes at a single venue and provides top-rate service. The involvement of the public in the formulation of all regional government policies, through the institution of the City Forum, makes its government practices transparent and accountable. With the support of skilled and reliable human resources, this city is very attractive for investment.*

**Tabel /Table 4.b**  
**Kelompok Peringkat A dan E Berdasarkan Kategori Umum/Best and Worst - Overall**

|                                 | Kelompok Peringkat/Cluster |                                                                            |                                                                                     |                                                                                                                                                        |
|---------------------------------|----------------------------|----------------------------------------------------------------------------|-------------------------------------------------------------------------------------|--------------------------------------------------------------------------------------------------------------------------------------------------------|
|                                 | A***                       | A**                                                                        |                                                                                     | E                                                                                                                                                      |
| <b>Kota/City</b>                | Kediri<br>Malang           | Balikpapan<br>Cilegon<br>Gorontalo<br>Jakarta<br>Madiun<br>Makassar        | Mojokerto<br>Palembang<br>Pare-pare<br>Sawahlunto<br>Tegal                          | Tanjung Balai<br>Dumai                                                                                                                                 |
| <b>Kabupaten/<br/>Regencies</b> | Purwakarta                 | Asahan<br>Badung<br>Barito Utara<br>Gianyar<br>Gowa<br>Gresik<br>Indramayu | Karawang<br>Klungkung<br>Kudus<br>Luwu Utara<br>Musi Banyuasin<br>Pinrang<br>Sinjai | Banggai<br>Bekasi<br>Bulungan<br>Cilacap<br>Lampung Barat<br>Majene<br>Pelalawan<br>Tabalong<br>Fakfak<br>Kapuas Hulu<br>Manggarai<br>Mimika<br>Sorong |

Dilihat dari daerah-daerah yang berada pada kelompok peringkat bawah (peringkat E) juga tidak

*It can be seen that the regions in the lowest cluster (ranking E) also showed little change from the rankings*

banyak perubahan, kelompok bawah hasil pemeringkatan tahun 2003 dan di tahun 2004 ini. Daerah-daerah seperti Mimika, Bengkulu Selatan, Kapuas Hulu, Mimika, Manggarai, Fak-fak, dan Sorong pada tahun 2003 juga termasuk dalam kelompok peringkat terbawah. Tampaknya, hingga tahun ke empat pelaksanaan otonomi, daerah-daerah yang berada pada kelompok terbawah ini belum juga berhasil berbenah diri dalam upaya menarik investasi. Masih ditemukan sejumlah persoalan, baik dari aspek, kelembagaan, maupun sosial politik, maupun dalam penyediaan infrastruktur fisik yang dapat mendorong pertumbuhan ekonomi daerahnya.

Kab. Sorong masih dibelit oleh persoalan kepastian hukum yang ada di daerah ini. Persoalah yang sering muncul terkait dengan kepastian hukum di Kab. Sorong adalah sengketa tanah antara pelaku usaha dan masyarakat lokal. Hingga saat ini Pemda Kab. Sorong belum mampu menciptakan kelembagaan yang bisa menangani persoalan-persoalan ini. Sementara Kab. Minahasa dinilai tidak baik dalam hal pengelolaan keuangan daerah dalam APBDnya, dimana daerah ini tidak memberikan prosesi yang baik untuk anggaran pembangunan di daerahnya. Hal ini tentunya berdampak pada penyediaan sarana dan prasarana yang dibutuhkan untuk memperlancar kegiatan bisnis di daerah ini. *Peringkat Daya Tarik Investasi Secara Umum secara keseluruhan dapat dilihat pada bagian lampiran 2.*

#### A.2. Peringkat Berdasarkan Faktor Kelembagaan

Faktor kelembagaan, terdiri dari Variabel Kepastian Hukum; Variabel Keuangan Daerah; Variabel Aparatur; dan Variabel Peraturan Daerah. Faktor kelembagaan merupakan faktor penting dalam pembentukan daya tarik investasi suatu daerah. Dari indikator-indikator yang ada dalam faktor kelembagaan ini semuanya adalah indikator-indikator yang secara langsung di bawah kendali pemerintah daerah, atau termasuk dalam *policy variabel*. Di sinilah peran pemda sangat menentukan dalam arah kebijakan pembangunan serta keberhasilan dalam membentuk iklim yang kondusif bagi investor. Salah satunya cermin

*in 2003 and 2004. Regions such as Mimika, South Bengkulu, Kapuas Hulu, Manggarai, Fak-fak, and Sorong were also in the lowest rank in 2003. It seems that even in this fourth year of implementation of regional autonomy, the regions in this lowest group have been unable to upgrade themselves to attract investment. Many problems are still found, both in institutional and sociopolitical aspects and in terms of provision of physical infrastructure to stimulate these regions' economic growth.*

*Sorong Regency is still entangled with issues of legal certainty. The problem that often arises in connection with legal certainty in Sorong Regency is land disputes between business operators and local people. Thus far, the Sorong regency government has been unable to create an institution that can handle these issues. In contrast, Minahasa Regency is considered poor in managing its regional finances through its local budget (APBD), as this region fails to allocate an adequate portion of the budget for development of the region. This obviously affects the provision of the facilities and infrastructure needed to facilitate business activities in the region. The Complete Overall Investment Attractiveness Rankings can be seen in the Appendix 2.*

#### A.2. Rankings Based on the Institutional Factor

*The institutional factor comprises the variables of Legal Certainty, Regional Finance, Government Services, and Local Regulations. These institutional factors are an important determinant of the investment attractiveness of a region. All of the indicators within the institutional factors are policy indicators in nature. Here, the regional government plays a very important role in setting the direction of development policy and in creating a business climate that is conducive for investors. One factor in the success of institutional factors is the quality of services provided by the regional government to the public. The regions that have the top rankings for institutional factors are those rated as*

keberhasilan dari aspek kelembagaan adalah bagaimana kualitas pelayanan yang diberikan oleh pemerintah daerah kepada publik. Daerah-daerah yang berada pada peringkat atas untuk faktor kelembagaan ini, dinilai baik dalam melakukan pelayanan birokrasi, penegakan hukum, sedikitnya penyalahgunaan wewenang, serta berhasil dalam menjalin kerjasama yang harmonis dengan pihak legislatif.

*good in provision of government services, strong in law enforcement, low in abuse of authority, and successful in forging harmonious cooperation with the legislature.*

**Tabel/Table. 5.a**  
**Rata-Rata Skor Faktor Kelembagaan/Average Scores for Institutional Factor:**

|                                         | 2003   |  | 2004   |
|-----------------------------------------|--------|--|--------|
| Kab & Kota/ <i>Regencies and Cities</i> | 0,0555 |  | 0,0586 |
| Kota/ <i>Cities</i>                     | 0,0483 |  | 0,0545 |
| Kabupaten/ <i>Regencies</i>             | 0,0575 |  | 0,0601 |

Hasil pembobotan menunjukkan bahwa pelaku usaha menaruh perhatian yang besar terhadap peraturan daerah, dibandingkan dengan indikator-indikator lainnya. Daerah-daerah yang menempati peringkat atas (A dan B), adalah daerah-daerah yang secara rata-rata skor tiap variabelnya baik, terutama untuk variabel-variabel yang memperoleh bobot besar. Secara rata-rata hasil pemeringkatan tahun 2004 untuk faktor kelembagaan menunjukkan adanya perbaikan.

Grafik 2. Memperlihatkan, hasil pengelompokan peringkat berdasarkan faktor

*The weightings show that business operators place more emphasis on regional regulations than on the other indicators. The regions with high rankings (A and B) are those that have an average good score on all variables, particularly on the variables that receive strong weightings. On average, the results of the ratings for institutional factors in 2004 showed improvement.*

*Graph 2 shows the rankings based on institutional factors. It can be seen that for the institutional factor,*

**Grafik/Graph. 2.**  
**Statistik Kelompok Peringkat Berdasarkan Kategori Kelembagaan/**  
**Ranking Based on the Institutional Score**

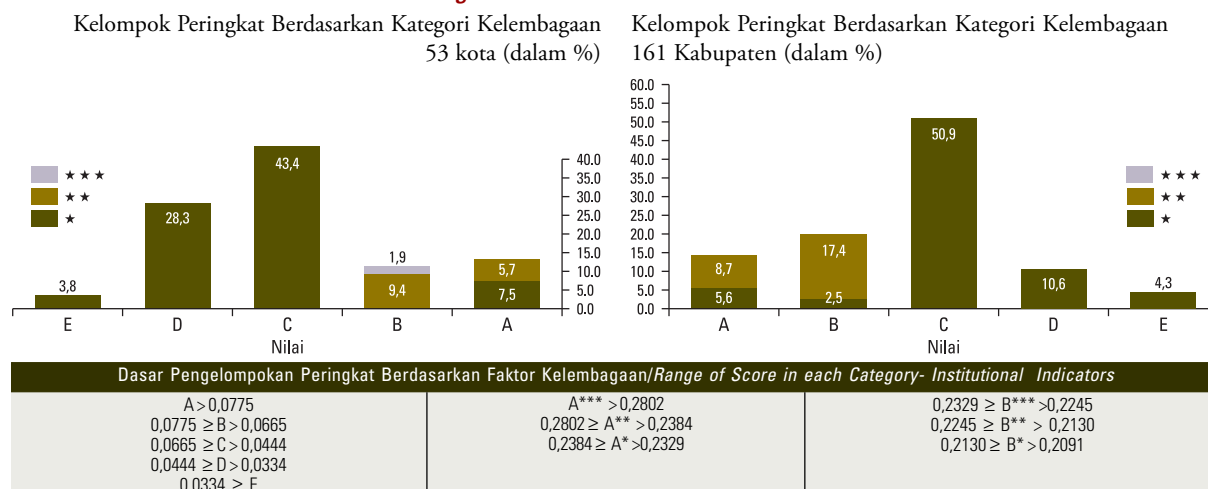

kelembagaan. Terlihat bahwa untuk faktor kelembagaan daerah Kabupaten secara rata-rata lebih baik dibandingkan daerah Kota. Namun demikian, untuk daerah kota tidak satupun daerah yang berada pada kelompok peringkat E.

Jika dilihat dari skor rata-rata yang diperoleh pada pemeringkatan 2004 mengalami peningkatan dibandingkan dengan hasil yang diraih pada pemeringkatan 2003. Namun demikian, untuk pemeringkatan tahun 2004 ini tidak satupun daerah yang mencapai skor tertinggi (A\*\*\*). Daerah-daerah perlu meningkatkan kinerja kelembagaannya dalam memberikan pelayanan yang lebih baik lagi kepada para pelaku usaha. Table 5.b. Memperlihatkan daerah-daerah yang berada pada kelompok peringkat A dan E, untuk faktor Kelembagaan.

Kota Gorontalo, adalah salah satu daerah yang berhasil membuktikan keberhasilannya dalam pengelolaan kelembagaan pemerintahannya. Pada pemeringkatan kali ini Kota Gorontalo berhasil menduduki peringkat atas untuk faktor kelembagaan. Keberhasilan Kota Gorontalo menduduki peringkat atas ini diperoleh berkat penilaian para pelaku usaha di sana yang merasakan pelayanan birokrasi yang baik, ditunjang dengan keberhasilannya dalam menekan penyelewengan di tubuh birokrasinya, serta mengurangi pungutan-pungutan tidak resmi. Kota ini merupakan pelopor perda tentang kebebasan informasi dan partisipasi publik, yang menjadi jaminan bagi setiap warganya untuk mendapatkan hak akan informasi mengenai pengelolaan kota, serta berpartisipasi dalam proses pengambilan kebijakan publik. Penerapan kedua perda tersebut secara konsisten, mampu meningkatkan kualitas pelayanannya publik di kota ini.

Perubahan di bidang kelembagaan di Kota Gorontalo ini barangkali sebagai imbas dari kebijakan yang inovatif di tingkat Propinsi Gorontalo, yang juga diikuti oleh Pemda-pemda di tingkat Kabupaten/Kota di wilayah ini. Pemda Propinsi Gorontalo dinilai mempunyai keberpihakan yang cukup besar terhadap aktivitas pelaku usaha di sana, seperti yang tercermin dalam kebijakan pengembangan komoditi pertanian

*regencies are on average better than cities. Even so, not one city falls into cluster E.*

*Looking at the average scores attained in the 2004 rankings, we note an increase compared with the 2003 rankings. However, in the 2004 rankings, not one region achieved the highest possible score (A\*\*\*). The regions need to improve their institutional performance by providing even better services to business operators. Table 5.b. shows the regions that fall into ranking clusters A and E for the institutional factor.*

*Gorontalo City is one region that has demonstrated success in managing its government institutions. In this year's ratings, Gorontalo City managed to obtain the highest ranking for the institutional factor. Gorontalo City achieved this success thanks to the evaluations from its business operators, who felt that government services are good, supported by success in reducing irregularities (corruption) within the bureaucracy and in reducing illegal levies. This city was also the pioneer in issuing local ordinances on freedom of information and public participation, which serve as a guarantee for every citizen's right to obtain information on city management and to participate in the public policy decision making process. The consistent application of these two regulations has helped to upgrade the quality of public services in the city.*

*This change in institutions in Gorontalo City may have been influenced by the innovative policies at the level of Gorontalo province, which were then followed by the regency/city regional governments within the province. The Gorontalo provincial government is seen as strongly supporting the activities of business operators there, as reflected in the policy for development of corn as an agricultural commodity. This harmonization of policies between the provincial level and regency/city*

jagung. Harmonisasi kebijakan antar tingkatan pemerintahan dari tingkat propinsi hingga tingkat kabupaten/kota, merupakan satu kekuatan dari kelembagaan di daerah ini. Rencana Umum Tata Ruang (RUTR) disusun secara terpadu dengan memperhatikan kondisi lokal. Pemda di Gorontalo juga telah berhasil mendorong kesejahteraan masyarakat dengan membebaskan biaya SPP untuk para pelajar dari tingkat SD hingga SLTA. Hal-hal tersebut mencerminkan *political will* dari pemda untuk pembangunan daerahnya.

Sementara itu di Kab. Indramayu, pelayanan birokrasi perizinan usaha dilakukan dengan sistem pelayanan satu atap pada tingkat kecamatan. Pemda senantiasa membuka akses bagi partisipasi masyarakat dalam pembangunan, maupun dalam setiap proses penyusunan perda dan kebijakan publik lainnya. Keberpihakan pemda pada pelaku usaha dan komitmennya pada pembangunan perekonomian lokal, oleh para pelaku usaha dinilai sebagai kebijakan yang suportif bagi investasi.

*level is one strength of the institutions in this region. The Land Use Master Plan (RUTR) is formulated in an integrated way, with attention to local conditions. The regional governments in Gorontalo have also succeeded in improving public welfare by exempting students from elementary through high school levels from having to pay SPP (Educational Management Contribution). These changes reflect the political will of the regional government to develop the region.*

*Meanwhile, in Indramayu Regency in West Java Province, business permitting services are provided through a one-roof service system at the district (kecamatan) level. The regional government provides ongoing access for community participation in development, including in the formulation of all local ordinances and other public policies. The regional government's support for the business community and its commitment to building the local economy are seen by business operators as policies that support investment.*

**Tabel /Table 5.b.**  
**Kelompok Peringkat A dan E Berdasarkan Faktor Kelembagaan/**  
**Best and Worst - The Institutional Factor**

|                                 | Kelompok Peringkat/Cluster |                                                                                 |                                                                                           |                                                                                                                                                                                                                  |
|---------------------------------|----------------------------|---------------------------------------------------------------------------------|-------------------------------------------------------------------------------------------|------------------------------------------------------------------------------------------------------------------------------------------------------------------------------------------------------------------|
|                                 | A***                       | A**                                                                             | A*                                                                                        | E                                                                                                                                                                                                                |
| <b>Kota/City</b>                |                            | Cilegon<br>Gorontalo<br>Kediri                                                  | Dumai<br>Mojokerto<br>Pare-pare<br>Sawahlunto                                             | Manado<br>Tanjung Pinang                                                                                                                                                                                         |
| <b>Kabupaten/<br/>Regencies</b> |                            | Asahan<br>Banggai<br>Barito Utara<br>Belu<br>Gowa<br>Indramayu<br>Lampung Barat | Luwu Utara<br>Musi Banyuasin<br>Pelalawan<br>Pinrang<br>Purwakarta<br>Sinjai<br>Way Kanan | Bungo<br>Ende<br>Gianyar<br>Kolaka<br>Solok<br>Tabalong<br>Tasikmalaya<br>Timor Tengah<br>Utara<br>Toli Toli<br>Bengkulu Selatan<br>Ciamis<br>Kapuas Hulu<br>Lampung Selatan<br>Minahasa<br>Musi Rawas<br>Sorong |

Daerah-daerah yang berada di peringkat terbawah berdasarkan faktor kelembagaan, banyak dijumpai persoalan yang dapat mengganggu iklim investasi. Persolan yang banyak terjadi di daerah-daerah tersebut adalah terkait dengan birokrasi pelayanan oleh Pemda, Kepastian Hukum, Peraturan Daerah dan dalam pengelolaan Keuangan Daerah. Peraturan daerah

*In the regions with the lowest rankings in terms of institutional factors, many problems are encountered that disturb the investment climate. The problems occurring most often in these regions are those related to the bureaucracy of regional government services, legal certainty, regional regulations, and regional financial management. Regional regulations seem to be the focus*

tampaknya masih menjadi perhatian serius bagi para pelaku usaha di daerah, karena peraturan daerah ini dipandang sebagai salah satu sumber ekonomi biaya tinggi bagi kegiatan usaha mereka.

Kab. Bengkulu Selatan, hingga saat ini masih disibukkan oleh penataan organisasi pemerintahannya setelah dilakukan pemekaran wilayahnya menjadi tiga kabupaten. Sementara para pelaku usaha di Bengkulu Selatan juga merasakan pelayanan yang tidak baik dari pemda setempat. Dari penelusuran di lapangan ditemukan sejumlah kasus investor yang membatalkan berinvestasi di daerah ini karena terlalu banyak pungutan yang harus mereka bayar dalam proses perizinan usaha. Di Kab. Bengkulu Selatan juga ditemukan sejumlah pos retribusi yang dikelola oleh pihak "swasta". Hal inilah yang banyak dikeluhkan oleh para pelaku usaha di Bengkulu Selatan. *Peringkat Berdasarkan Faktor Kelembagaan secara keseluruhan dapat dilihat pada bagian lampiran 3.*

*of concern for business operators in the regions, because these local regulations are seen as one source of the high cost economy that affects their business operations.*

*South Bengkulu Regency is still busy reorganizing its government structures after a partitioning that converted its territory into three regencies. Business operators in South Bengkulu also feel that the local government's services are poor. Investigations in the field found a number of cases in which investors cancelled their investments in this region due to the excessive fees they had to pay in the business permitting process. There are also quite a few unofficial levy points in South Bengkulu Regency, operated by "private" parties. This is the thing that business operators in South Bengkulu complain about the most. Complete Rankings based on the Institutional Factor can be seen in the Appendix 3.*

**Diagram/Figure. 7**

**Tingkat Kebermasalahan Perda /Regional Regulations by Level of Problems Created**  
**N : 1.025**

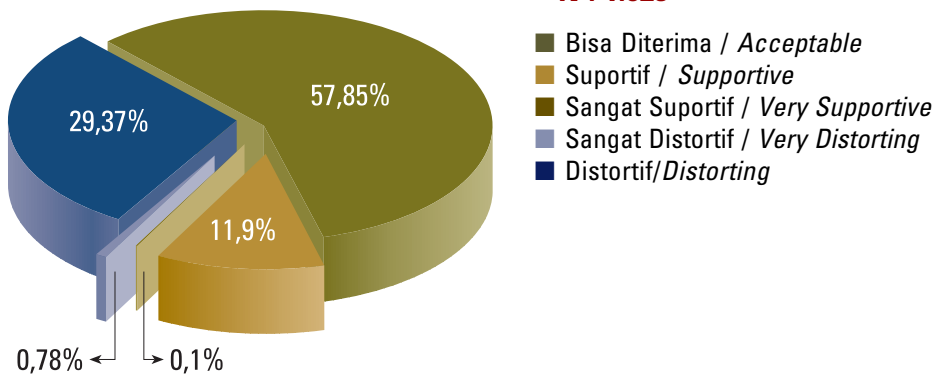

**Diagram/Figure. 8**

**Kualitas Perda Menurut Pelaku Usaha/**  
**Quality of Regional Regulations According to Business Operators**  
**N : 5.184**

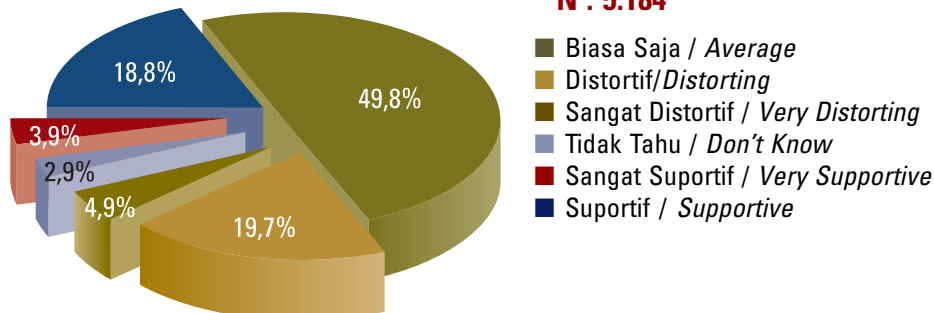



**Diagram/Figure. 9**  
**Jenis Pelanggaran Perda /Type of Violations in Regional Regulation**  
**N : 1.025**

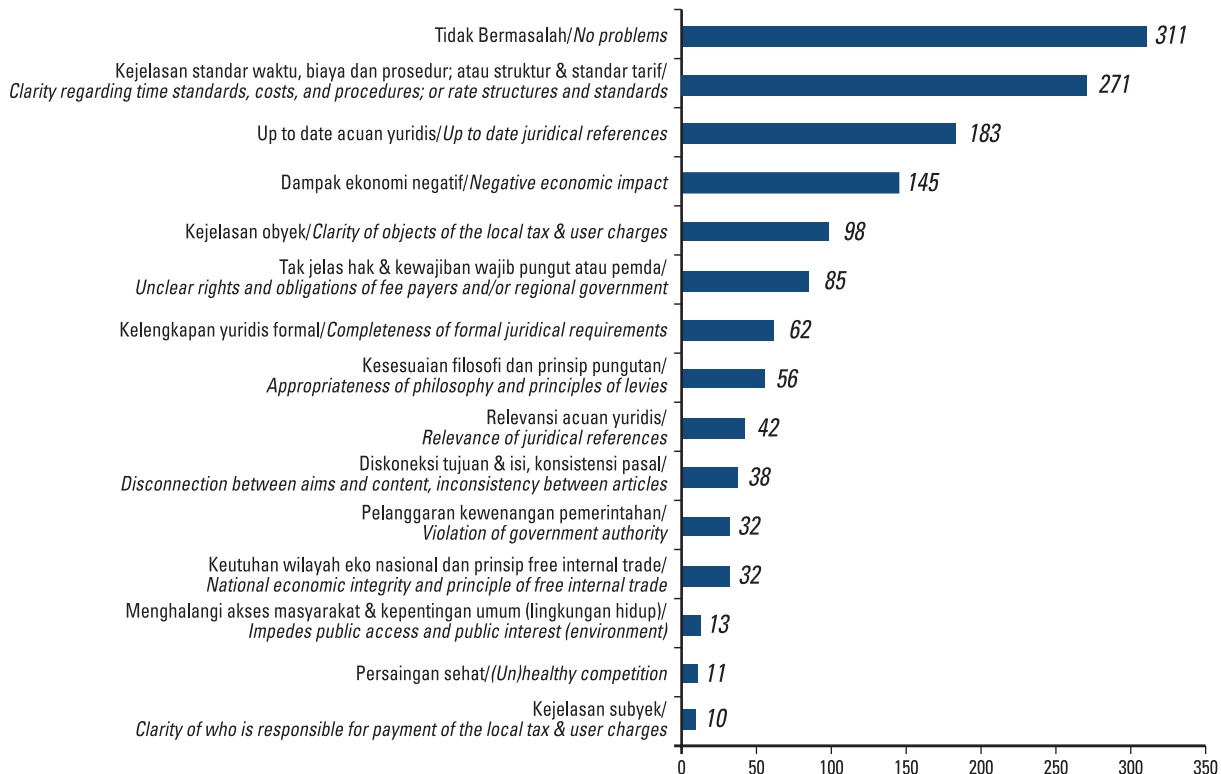

Pada pemeringkatan tahun 2004 ini atau sampai dengan tahun ke-4 pelaksanaan otonomi daerah, sejumlah persoalan terkait dengan faktor kelembagaan masih ditemukan. Salah satu persoalan yang belum juga menunjukkan perbaikan yang signifikan adalah terkait dengan sejumlah peraturan daerah yang dinilai masih mendistorsi kegiatan usaha di beberapa daerah.

Dari penelitian lapangan ditemukan bahwa 24,6% responden pelaku usaha merasakan distorsi perda terhadap kegiatan usaha mereka. Hal ini sejalan dengan hasil analisis kualitatif terhadap 1.025 dokumen perda dari 214 daerah, dimana 30,15% diantaranya berpotensi mendistorsi aktivitas usaha. Masih banyaknya perda-perda yang dinilai distorsif terhadap aktivitas usaha ini terkait dengan proses perumusan kebijakan daerah ini yang masih kurang baik, dalam artian kurang partisipatif atau kurang melibatkan para pelaku usaha yang akan menanggung beban dari peraturan tersebut.

*In these rankings for 2004, after four years of implementation of regional autonomy, various problems related to institutional factors still persist. One issue that has shown little significant improvement is the large number of local regulations that distort business activities in many regions.*

*Field research found that 24.6% of business operator respondents felt they experienced distortion of their business activities. This is in line with the results of a qualitative KPPOD desk analysis of 1,025 regional regulation documents from the 214 regions, 30.15% of which could distort business activities. The continuing large number of local regulations that are felt to distort business activities is related to the poor policy formulation process in these regions resulting from the lack of participation or involvement in this process of the business operators who will bear the burden of these regulations. Field findings revealed that 84.6%*

Dari temuan lapangan diketahui bahwa 84,6 % dari 5.184 responden pelaku usaha mengaku tidak dilibatkan dalam perumusan kebijakan daerah. Sementara dari 12% yang dilibatkan dalam perumusan kebijakan daerah 59,6% diantaranya menyatakan kualitas pelibatangannya tidak baik, dan 8,1% menyatakan biasa saja. Sebagian besar pelaku usaha yang menyatakan dilibatkan dalam perumusan kebijakan menyatakan bahwa proses pelibatangannya hanya sebatas formalitas dan terbatas pada sosialisasi. *Stakeholders* dari kalangan pelaku usaha ini, kebanyakan hanya diundang pada proses sosialisasi ketika rancangan perda sudah jadi. Pelibatan mereka tidak dilibatkan secara aktif dari proses perumusan awal kebijakan yang hendak diputuskan, namun masukan yang mereka berikan tidak mendapat respon positif untuk dilakukan perubahan.

*of the 5,184 business operator respondents claimed they were not involved at all in the formulation of regional policies. Of the 12% who said they were involved in policy formulation, 59.6% said the level of their involvement was poor, and 8.1% said it was just average. Most of the business operators who said they were involved in policy formulation said that their involvement was a mere formality and limited to receiving information. The stakeholders from the business community were generally only invited to hear about the regulations after the drafts of the regulations had already been prepared. They were not actively involved in the initial formulation of the policies to be introduced, nor did the input they provided receive any positive response.*

**Diagram/Figure. 10**  
**Perda Berdasarkan Tingkat Kebermasalahan/Regional Regulations by Type of Problems**  
**N : 1.025**

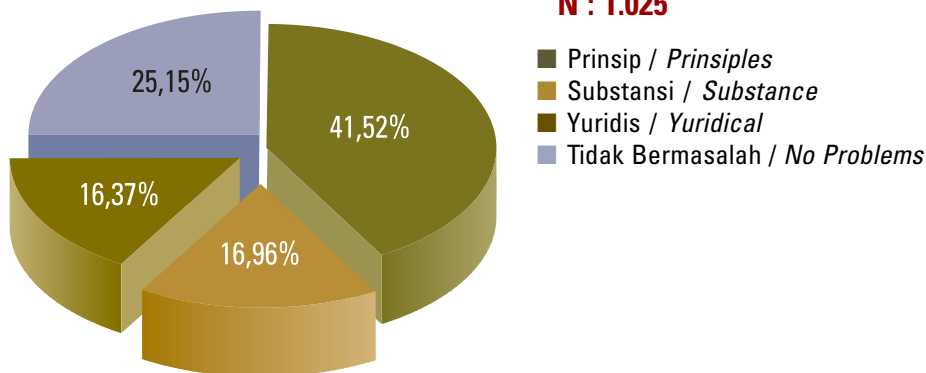

Terkait dengan faktor kelembagaan, kepastian hukum juga masih menjadi persoalan yang krusial. Di banyak daerah masih ditemukan praktik-praktik pungutan liar, baik yang dilakukan dalam tubuh birokrasi maupun di luar birokrasi. Dari hasil penelitian lapangan ditemukan bahwa besarnya pungutan liar yang harus ditanggung oleh para pelaku usaha dalam aktivitas bisnis mereka rata-rata adalah sebesar 6,81% dari total biaya produksi atau operasional usaha mereka. Besarnya pungutan liar ini tentunya menimbulkan ekonomi biaya tinggi yang dapat mengurangi daya saing usaha mereka. Dalam tubuh birokrasi praktik-

*In connection with the institutional factor, legal certainty also remains a crucial issue. In many regions, practices of illegal levies remain rampant, both within the bureaucracy and outside it. Survey results revealed that the amount of illegal levies that must be paid by business operators in their business activities averages 6.81% of their total production costs or business operation costs. The high level of these illegal levies obviously creates a high cost economy, which in turn reduces competitiveness. Within the bureaucracy, the illegal levy practices that routinely occur in the permitting process continue to be a hindrance. The amount of unofficial fees that business operators have*

praktik pungli yang biasa terjadi dalam proses pengurusan birokrasi perizinan juga masih menjadi kendala. Besarnya biaya tidak resmi yang harus dibayar oleh pelaku usaha dalam proses pengurusan izin rata-rata adalah sebesar 64,25% dari biaya resmi yang tercantum dalam peraturan formal. Angka ini tampaknya kurang signifikan, mengingat biaya perizinan usaha di berbagai daerah tidak terlalu besar. Namun masih ada 1,6% responden pelaku usaha yang menyatakan bahwa pungli dalam mengurus perizinan usaha mencapai 500% dari biaya resmi yang diatur dalam ketentuan formal (perda).

### A.3. Peringkat Berdasarkan Faktor Sosial Politik

Kondisi sosial politik merupakan politik suatu daerah merupakan prasarat mutlak untuk daya tarik investasi suatu daerah. Suatu kegiatan usaha tidak akan dapat berjalan lancar tanpa didukung oleh keamanan, sikap keterbukaan masyarakat, dan kondisi politik yang kondusif. Selama tahun 2004, secara umum untuk faktor sosial politik di berbagai daerah di Indonesia dinilai oleh para pelaku usaha menunjukkan adanya perbaikan, terutama untuk kondisi keamanan dan konflik sosial. Secara rata-rata hasil pemeringkatan berdasarkan faktor sosial politik tahun 2004 menunjukkan hasil yang lebih baik dibandingkan tahun 2003. Hal ini mengindikasikan bahwa, iklim investasi berdasarkan faktor sosial politik berbagai daerah di Indonesia mengalami perbaikan dari tahun ke tahun.

*to pay when arranging permits averages 64.25% of the officially declared rates. This figure might appear relatively insignificant, given that the business permitting costs in most regions are not that high. But 1.6% of business operator respondents said that the illegal levies they paid in arranging their permits came to 500% of the official fees stipulated in the formal provisions (regional regulations).*

### A.3. Rankings Based on the Social-Political Factor

*Good social and political conditions are an absolute prerequisite for any region's investment attractiveness. A business cannot run smoothly unless it is supported by security, an open attitude from the local people, and conducive political conditions. During 2004, the social-political factors in most regions of Indonesia were generally seen by business operators as showing some improvement, particularly with regard to security conditions and social conflict. The average rankings by social-political factor for 2004 showed better results than in 2003. This indicates that the investment climate based on social-political factors in many regions in Indonesia is improving from year to year.*

**Tabel/Table 6.a.**

**Rata-Rata Skor Faktor Sosial Politik/Average Scores for Socio-Political Factor:**

|                                         | 2003   |   | 2004   |
|-----------------------------------------|--------|---|--------|
| Kab & Kota/ <i>Regencies and Cities</i> | 0,0506 | ➡ | 0,0582 |
| Kota/ <i>Cities</i>                     | 0,0434 | ➡ | 0,0552 |
| Kabupaten/ <i>Regencies</i>             | 0,0526 | ➡ | 0,0592 |

Rata-rata skor faktor sosial politik daerah kabupaten lebih baik dibandingkan dengan daerah perkotaan. Hal ini menunjukkan bahwa secara umum kondisi sosial politik daerah kabupaten lebih baik dibandingkan dengan daerah perkotaan. Namun demikian masih ada satu daerah kabupaten yang berada pada kelompok peringkat E. Grafik

*On average, the social-political factor scores for regencies were better than those for cities. Nevertheless, there was one regency that fell into ranking cluster E. Graph 3 shows the results of the rankings based on social and political factors.*

3., memperlihatkan hasil pengelompokan peringkat daerah berdasarkan faktor sosial politik

Secara umum kondisi sosial politik daerah kabupaten *sedikit lebih baik* dibandingkan dengan daerah perkotaan. Secara umum kondisi keamanan berusaha selama tahun 2004 kondusif untuk kegiatan usaha. Dari penelusuran di lapangan diketahui bahwa, 92% responden dunia usaha menyatakan kondisi keamanan di berbagai daerah kondusif untuk kegiatan usaha. Namun demikian perlu mendapat perhatian dari berbagai pihak karena masih ada 7,4% pelaku usaha yg menyatakan kurang aman. Beberapa jenis gangguan keamanan yang sering dialami oleh para pelaku usaha diantaranya adalah pencurian di lokasi usaha (25% responden); penghadangan di jalan ( 9%); perusakan asset (7,9%); dan penjarahan (3,1% responden).

*In general, the social and political conditions of regencies are slightly better than in cities. Generally speaking, the business security conditions during 2004 were conducive for business activities. Investigations in the field found that 92% of business community respondents stated that security conditions in their regions were conducive for business activities. However, attention is still needed from certain parties, as there are still 7.4% of business operators who say they feel unsafe. The types of security disturbances often experienced by business operators include theft at the place of business (25% of respondents); robberies on the road (9%); damage to assets/ vandalism (7.9%); and looting (3.1% of respondents).*

**Grafik/Graph. 3.**  
**Statistik Kelompok Peringkat Berdasarkan Faktor Sosial Politik/**  
**Ranking Based on the Socio-Political Score**

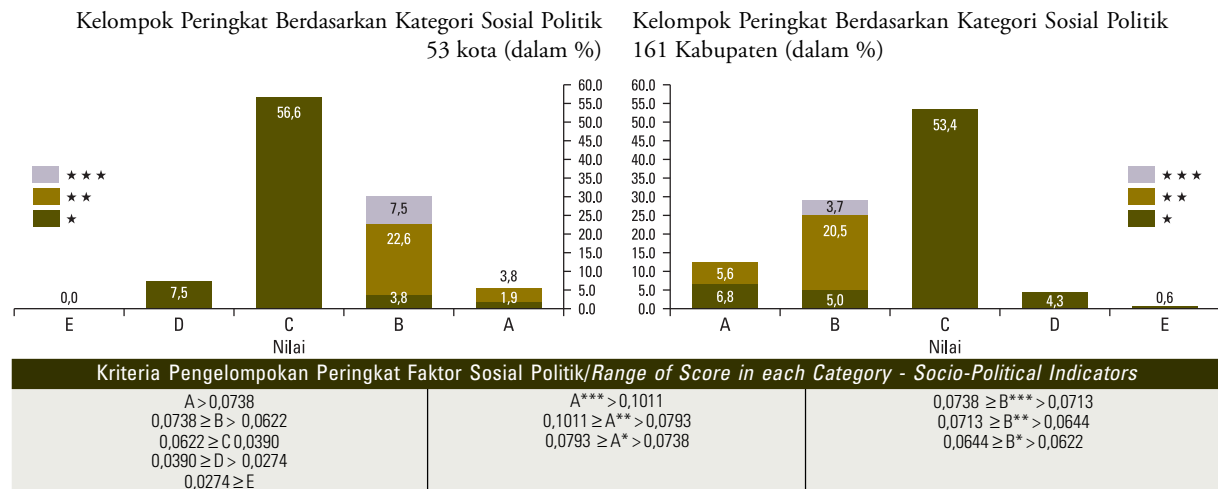

Hal yang menonjol terjadi di tahun 2004 adalah kondisi politik yang sedikit memanas sebagai dampak dari penyelenggaraan pesta demokrasi, pemilu anggota legislative dan pemilu presiden secara langsung. Kondisi ini merata ke seluruh penjuru tanah air, sehingga faktor politik mengalami penurunan. Dari penelusuran lapangan, 15,6% pelaku usaha menyatakan merasa terganggu dengan kondisi politik selama tahun 2004. Sementara 7% responden menilai hubungan

*One significant aspect of 2004 was that the political situation heated up somewhat due to the “festival of democracy”: the election of legislators at various levels and the first-ever direct presidential election. This situation prevailed throughout the nation, causing a decline in ratings for the political factor. According to field surveys, 15.6% of business operators said that they felt disturbed by the political situation during 2004. Seven percent of respondents felt that relations between the executive and legislative branches disrupted*

Eksekutif dan Legislatif mengganggu pelayanan terhadap dunia usaha, dan 9% terganggu oleh aksi unjuk rasa buruh.

*services to the business community, and 9% were disturbed by labor unrest.*

**Tabel/Table 6.b.**  
**Kelompok Peringkat A dan E Berdasarkan Faktor Sosial Politik/Best and Worst - Socio-Political**

|                                 | Kelompok Peringkat/Cluster |                                                            |                                                  |                                                   |                                                         |      |
|---------------------------------|----------------------------|------------------------------------------------------------|--------------------------------------------------|---------------------------------------------------|---------------------------------------------------------|------|
|                                 | A***                       | A**                                                        |                                                  | A*                                                |                                                         | E    |
| <b>Kota/City</b>                |                            | Mojokerto<br>Pare-pare                                     |                                                  | Tegal                                             |                                                         |      |
| <b>Kabupaten/<br/>Regencies</b> |                            | Bangli<br>Ciamis<br>Gianyar<br>Magetan<br>Majene<br>Sinjai | Sukoharjo<br>Tapin<br>Tebo<br>Sangihe<br>Selayar | Banggai<br>Bone<br>Buton<br>Enrekang<br>Indramayu | Jeneponto<br>Klungkung<br>Lampung Barat<br>Lombok Timur | Poso |

Tabel 6.b., memperlihatkan daerah-daerah yang berada pada kelompok peringkat A dan E. Dari kelompok peringkat tersebut terlihat bahwa tidak satupun daerah yang berhasil berada pada peringkat A\*\*\*. Ini menunjukkan bahwa pada tahun 2004, daerah-daerah yang sebelumnya memperoleh peringkat A\*\*\* mengalami penurunan. Daerah-daerah Kabupaten yang berada pada peringkat atas untuk faktor sosial politik memperlihatkan kondisi sosial politik mereka yang baik.

Kab. Barru di Sulawesi Selatan merupakan salah satu daerah yang berada pada peringkat atas. Para pelaku usaha di Kab. Barru menilai indikator-indikator yang tergabung dalam faktor sosial politik sangat baik. Berdasarkan penilaian para pelaku usaha di Kab. Barru, aparat keamanan sangat cepat dalam menanggulangi gangguan keamanan, baik terhadap aktivitas usaha maupun yang terjadi di masyarakat, hal inilah yang menurut para pelaku usaha menjadi salah satu faktor mengapa selama tahun 2004 di daerah ini tidak dijumpai adanya gangguan keamanan terhadap aktivitas usaha. Sikap masyarakat yang terbuka terhadap masuknya investasi dari luar, dan memiliki etos kerja yang baik, ditunjang dengan kondisi politik lokal yang stabil, juga merupakan faktor penting yang mengakibatkan daerah ini berada pada peringkat teratas untuk faktor sosial politik.

Kota Mojokerto berada pada peringkat atas untuk faktor sosial politik karena etos kerja

*Table 6.b shows the regions in ranking clusters A and E. From these rankings it can be seen that no region succeeded in attaining an A\*\*\* rating. This indicates that in 2004, those regions that had previously obtained A\*\*\* ratings experienced a decline. The regencies in the top ranking for social and political factors demonstrated their good social and political conditions.*

*Barru Regency in South Sulawesi was the top-ranked region. Business operators in Barru Regency rated the indicators included in the social-political factor as excellent. According to the evaluation by business operators in Barru Regency, the security officials are very quick in handling security disturbances, both those that disrupt business activities and those within the community; they felt that this was one reason why there were no security disturbances that disrupted business activities in the regency during 2004. The public's open attitude toward investment coming in from outside, and the community's strong work ethic, supported by a stable local political situation, were other important elements that put this region in first place for the social-political factor.*

*The city of Mojokerto was in the top ranking for the social-political factor thanks to the community's*

masyarakat yang tinggi, dan sikap terbuka kepada investor dari luar, yang merupakan cermin kesadaran masyarakat akan pentingnya investasi. Di kota ini hampir tidak pernah terjadi gangguan keamanan usaha. Pemko senantiasa mengkomunikasikan setiap rencana kebijakan kepada masyarakat, dan menjalin kerjasama secara harmonis dengan DPRD. Sementara Kota Tegal, berhasil memperoleh peringkat atas berdasarkan faktor sosial politik berkat kemampuan pemerintah dalam menciptakan iklim politik yang kondusif, keamanan yang mantap, kecepatan aparat keamanan dalam menanggulangi gangguan keamanan. Rendahnya aksi unjuk rasa di Kota Tegal disebabkan pemko senantiasa memberi ruang bagi publik untuk berpartisipasi dalam proses perumusan kebijakan daerah. Sementara kultur agraris, dengan sikap terbuka bagi kehadiran dunia usaha dari luar, adalah keseharian yang ada di Kab. Magetan. Dinamika politik yang terjadi di daerah tidak mengganggu kegiatan usaha di sana. Kecepatan aparat dalam merespon dan menanggulangi gangguan keamanan, membuat daerah ini sebagai tempat yang aman untuk berinvestasi.

Kabupaten Poso menjadi satu-satunya daerah yang mendapat peringkat E untuk kategori Sosial Politik. Konflik sosial di daerah ini yang tidak kunjung selesai, menyebabkan daerah ini tetap berada pada peringkat terbawah untuk faktor sosial politik seperti hasil pemeringkatan tahun-tahun sebelumnya. Kondisi sosial politik di daerah-daerah ini sering memberikan citra negatif terhadap daya tarik investasi Indonesia di mata internasional. Kab. Poso, yang hingga saat ini masih diliputi oleh konflik sosial adalah daerah yang berada pada peringkat terendah untuk kategori ini. Konflik sosial yang berkepanjangan, dinilai merupakan ancaman utama bagi aktivitas bisnis di sana. (*Peringkat Berdasarkan Faktor Sosial Politik secara keseluruhan dapat dilihat pada bagian lampiran 4.*)

Selain Kab. Poso, beberapa daerah yang berada pada peringkat bawah (D) juga menunjukkan kondisi yang kurang menggemblirakan. Hal yang hampir sama dengan Kab. Poso juga terjadi pada daerah tetangganya yaitu Kab. Morowali.

*strong work ethic and openness to outside investors, which reflects the public's awareness of the importance of investment. In this city, disturbances to business security almost never occur. The city government regularly communicates all planned policies to the public, and maintains harmonious relations with the local legislature (DPRD). The city of Tegal also achieved a high rating for the social-political factor thanks to the government's capability in creating a conducive political climate, the solid security situation, and the security forces' speed in dealing with any security disturbances. The level of demonstrations in the city of Tegal is low because the city government provides space for the public to participate in the process of formulating local policies. Meanwhile, the agrarian culture and an attitude of openness to the presence of outside businesses are part of daily life in Magetan Regency. The political dynamics that occur in this region do not disrupt business activities. The security apparatus's speed in responding to and handling security disturbances makes this region a safe place to invest.*

*Poso Regency was the only region to receive an E ranking in the social-political category. The unending social conflict in this region put it in last place for the social-political factor, just as in the previous years. The poor social-political situation in this region often creates a negative image for Indonesia's overall investment attractiveness in the eyes of the international community. The protracted social conflict is felt to be the main threat to business activities in the region. (Complete Rankings Based on Social and Political Factors can be seen in the Appendix. 4.)*

*Apart from Poso Regency, several other regions in the other low ranking cluster, (D), also show a worrisome situation. Nearly the same situation as in Poso Regency also prevails in the neighboring region of Morowali Regency. And the mental attitude of the*

Sementara sikap mental masyarakat daerah-daerah di Papua, seperti Kab. Sorong, Kab. Fak-Fak, dan Mimika, yang dinilai tidak terbuka terhadap investor mengakibatkan keengganan investor untuk masuk ke daerah ini, padahal jika ditinjau dari potensi sumber daya alamnya, daerah-daerah tersebut sangat menjanjikan. Di Kab. Mimika pada tahun 2004 juga diwarnai bentrokan antar kelompok warga yang dipicu oleh rencana pemekaran wilayah propinsi. Konsisi politik lokal di Kab. Kutai Kalimantan Timur dan Manggarai di NTT selama tahun 2004 menyebabkan peringkat daerah ini untuk faktor sosial politik dinilai tidak baik oleh para pelaku usaha.

Untuk kelompok daerah kota, Kota Sorong dinilai kurang kondusif gangguan masyarakat, terhadap aktivitas usaha dan sikap kurang terbukanya masyarakat terhadap aktivitas usaha. Di Kota Cirebon konflik eksekutif legislatif yang terjadi selama tahun 2004 dirasakan mengganggu pelayanan pada dunia usaha. Sementara Kota Tangerang ancaman faktor sosial politik datang dari gangguan keamanan usaha, unjuk rasa buruh. Sedangkan keterpurukan peringkat Kota Palu berdasarkan faktor sosial politik karena selama tahun 2004 di kota ini sering terjadi ancaman bom, dan kerusuhan sosial.

#### A.4. Peringkat Berdasarkan Faktor Ekonomi Daerah

Faktor ekonomi daerah adalah indikasi dari potensi ekonomi dan struktur ekonomi suatu daerah yang merupakan pertimbangan yang juga penting dalam keputusan berinvestasi. Potensi ekonomi bisa dilihat dari potensi yang berbasis sumber daya alam, maupun potensi akibat bentukan karena didorong oleh aktivitas usaha atau adanya investasi. Kedua aspek tersebut harus dapat berjalan selaras agar tercipta pertumbuhan ekonomi yang tinggi, dan struktur ekonomi yang kuat sehingga dapat memacu kemajuan perekonomian daerah, peningkatan daya beli, dan sikap mental masyarakat yang mendorong kearah kemajuan dan modern.

Peringkat atas untuk faktor ekonomi daerah, didominasi oleh daerah-daerah yang memiliki

*communities in several regions in Papua – Sorong Regency, Fak-Fak Regency, and Mimika – which is considered unfriendly to outside investment, deters investors from coming into these regions, despite these regions' great promise in terms of natural resources. In 2004, Mimika Regency also experienced intercommunal conflict, triggered by the plan to partition the province of Papua. Local political conditions in Kutai, East Kalimantan and in Manggarai, NTT during 2004 caused business operators to give these region low ratings for the social-political factor.*

*Among the cities, the city of Sorong was considered not very attractive due to community disruptions of business activities and the community's lack of openness toward business activities. In the city of Cirebon, the conflict between the executive and legislative branches that occurred during 2004 was felt to have disrupted services to the business community. And in the city of Tangerang, the major social-political threat came from security disruptions in the form of worker demonstrations. Finally, the miserable ranking of the city of Palu in the social-political factor during 2004 was due to frequent bomb threats and social unrest.*

#### A.4. Rankings Based on the Regional Economy Factor

*The regional economic dynamism factor is an indicator of the economic potential and economic structure of a region, which is another important consideration in any investment decision. Economic potential can be seen from potential based on natural resources, and also from "created" potential resulting from business activities or the presence of investment. These two aspects must proceed in harmony to promote high economic growth and a strong economic structure, so as to spur progress in the region's economy, increased buying power, and a mental attitude within the community that promotes progress and modernity.*

*The top rankings for the regional economy factor were dominated by regions with good natural resource*



potensi sumber daya alam yang baik dan daerah-daerah yang telah memiliki pertumbuhan ekonomi yang tinggi akibat aktivitas bisnis yang relatif modern yang ditunjukkan dengan tingkat industrialisasi yang tinggi. Hasil pemeringkatan tahun 2004 menunjukkan terjadinya perubahan yang signifikan pada indikator-indikator ekonomi daerah. Secara rata-rata kondisi perekonomian daerah mengalami peningkatan yang signifikan.

*potential and those that already have high rates of economic growth due to relatively modern types of business activities, as indicated by a high level of industrialization. The rankings for 2004 show significant changes in the regional economy indicators. On average, regional economic conditions experienced significant improvements.*

**Tabel/Table 7.a.**

**Rata-Rata Skor Faktor Ekonomi Daerah/Average Scores for Economic Dynamism Factor:**

|                                         | 2003   |       | 2004   |
|-----------------------------------------|--------|-------|--------|
| Kab & Kota/ <i>Regencies and Cities</i> | 0,0313 | ▮▮▮▮▮ | 0,0327 |
| Kota/ <i>Cities</i>                     | 0,0424 | ▮▮▮▮▮ | 0,0465 |
| Kabupaten/ <i>Regencies</i>             | 0,0282 | ▮▮▮▮▮ | 0,0281 |

Indikator-indikator ekonomi daerah kota, lebih baik dibandingkan dengan daerah kabupaten. Mayoritas daerah kota berada pada kelompok peringkat B hingga A, dan tidak satupun yang memiliki peringkat E. Sebaliknya daerah kabupaten lebih banyak yang berada pada peringkat D dan E. Grafik 4 memperlihatkan hasil pengelompokan peringkat berdasarkan faktor ekonomi daerah.

*The economic indicators for cities are better than those for regencies. A majority of the cities rank in clusters B and A, and none has an E ranking. In contrast, most of the regency regions are in ranking clusters D and E. Graph 4 shows the rankings based on the regional economic dynamism factor.*

**Grafik/Graph. 4.**  
**Statistik Kelompok Peringkat Berdasarkan Faktor Ekonomi Daerah/**  
**Ranking Based on the Economic Dynamism Score**

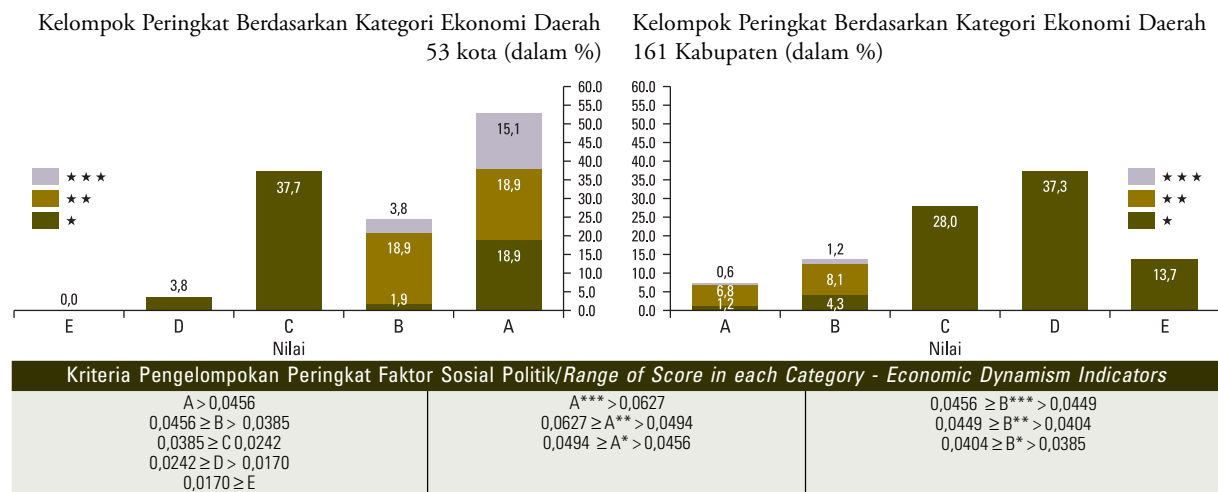

Rata-rata PDRB perkapita kota sebesar Rp. 11,42 juta, kabupaten hanya sebesar Rp. 5,25 juta. Sementara rata-rata pertumbuhan ekonomi kota

*The average per capita GRDP in cities is Rp. 11.417.446,80, while in regencies it is only Rp. 5.252.425,57. Furthermore, the average rate of*



sebesar 4,9% pertahun, sedangkan kabupaten hanya 2,3% pertahun. Hal ini penyebab peringkat faktor ekonomi kota lebih baik dibandingkan kabupaten.

Kota-kota yang berada pada peringkat atas berdasarkan faktor ekonomi daerah, dicirikan dengan tingkat pertumbuhan ekonomi yang tinggi, dan memiliki PDRB Perkapita yang juga Tinggi. Kota Sibolga memiliki PDRB Perkapita sebesar Rp.7,06 juta pada tahun 2003, dengan rata-rata pertumbuhan ekonomi 5,2% selama tahun 1999 – 2003. Selain dari struktur ekonomi yang mantap, Kota Sibolga juga merupakan sebuah kota yang memiliki keunggulan dalam hal potensi sumber daya perikanan yang melimpah. Kegiatan ekonomi dari sektor perikanan menyumbang 25% terhadap keseluruhan perekonomian di Kota Sibolga.

*economic growth in cities is 4.9%, and in regencies only 2.3%. This is why the economic factor rankings for cities are higher than those for regencies.*

*The cities in the top ranking for regional economic dynamism are characterized by a high level of economic growth, and also have high per capita GRDP. The city of Sibolga had a per capita GRDP of Rp.7.060.886 in 2003, with average economic growth of 5.2% per year from 1999 to 2003. In addition to a solid economic structure, Sibolga also has a strong advantage from its abundant fishery resources. Economic activity from the fisheries sector contributes 25% to Sibolga's overall economy.*

**Tabel/Table 7.b.**  
**Kelompok Peringkat A dan E Berdasarkan Faktor Ekonomi Daerah/**  
**Best and Worst - Economic Dynamism**

|                                 | Kelompok Peringkat/Cluster                                                                    |                                                                                                                                       |                                                                                                                          |                                                                                                                        |                                                                                                                     |                                      |
|---------------------------------|-----------------------------------------------------------------------------------------------|---------------------------------------------------------------------------------------------------------------------------------------|--------------------------------------------------------------------------------------------------------------------------|------------------------------------------------------------------------------------------------------------------------|---------------------------------------------------------------------------------------------------------------------|--------------------------------------|
|                                 | A***                                                                                          | A**                                                                                                                                   | A*                                                                                                                       | E                                                                                                                      |                                                                                                                     |                                      |
| <b>Kota/City</b>                | Balikpapan<br>Bandung<br>Batam<br>Makassar<br>Palembang<br>Pekan Baru<br>Samarinda<br>Sibolga | Binjai<br>Bitung<br>Cirebon<br>DKI Jakarta<br>Kupang<br>Malang<br>Pematang<br>Siantar<br>Surakarta<br>Tanjung Balai<br>Tanjung Pinang | Bandar<br>Lampung<br>Bogor<br>Cilegon<br>Denpasar<br>Kediri<br>Padang<br>Semarang<br>Surabaya<br>Tangerang<br>Yogyakarta |                                                                                                                        |                                                                                                                     |                                      |
| <b>Kabupaten/<br/>Regencies</b> | Asahan                                                                                        | Bekasi<br>Berau<br>Cilacap<br>Dairi<br>Kutai Timur<br>Labuhan Batu<br>Langkat<br>Purwakarta<br>Tabalong                               | Gresik<br>Sidoharjo                                                                                                      | Bengkulu Utara<br>Bima<br>Bondowoso<br>Buton<br>Dompu<br>Flores Timur<br>Gorontalo<br>Hulu Sungai Utara<br>Karang Asem | Kebumen<br>Ketapang<br>Lamongan<br>Lombok Barat<br>Lombok Timur<br>Manggarai<br>Musi Rawas<br>Pamekasan<br>Ponorogo | Poso<br>Selayar<br>Tegal<br>Wonosobo |

Kota Balikpapan merupakan pusat pertumbuhan baru di Pulau Kalimantan. Kota ini memiliki keunggulan dari sisi pertumbuhan ekonomi, dan PDRB Perkapita. Rata-rata pertumbuhan ekonomi kota ini mencapai 9,4%

*The city of Balikpapan is a new growth center in Kalimantan. This city has a high rate of economic growth and a high per capita GRDP. The city's average economic growth is 9.4% per year, making it one of the main economic growth centers in Indonesia. The*

pertahun, menjadikannya sebagai salah satu pusat pertumbuhan ekonomi di Indonesia. Kegiatan ekonomi produktif yang ada, mampu meningkatkan daya beli masyarakat hingga mencapai Rp.19,5 juta. Tingginya Indeks Pembangunan Manusia daerah ini (73) melampaui rata-rata IPM nasional (65), adalah bukti keberhasilan pembangunan di daerah ini. Perekonomian Kota Balikpapan juga ditopang oleh kegiatan di sektor pertambangan. Kota ini dijadikan kantor pusat berbagai perusahaan pertambangan yang berskala multinasional, sehingga fasilitas kota ini sangat lengkap.

Kab. Asahan, Berau, Kutai Timur, Tabalong, Labuhan Batu, Langkat, dan Dairi adalah daerah-daerah yang berbasis potensi sumber daya alam yang melimpah. Struktur perekonomian Kab. Asahan bisa dikatakan cukup kuat dan mantap. Dengan perpaduan sektor primer dan sekunder yang seimbang, mampu meningkatkan daya beli masyarakat hingga mencapai Rp.11,7 Juta. Dengan laju pertumbuhan ekonomi 5,4% pertahun, dan ketersediaan lahan yang luas, menjadikan ekonomi daerahnya sangat menarik.

Sementara Kab. Purwakarta, Cilacap, Bekasi, dan Sidoarjo adalah daerah-daerah yang berbasis ekonomi moderen dengan industrialisasi yang cukup tinggi, dan dikenal sebagai pusat-pusat industri di Indonesia. Daerah-daerah yang berada pada peringkat atas berdasarkan faktor ekonomi daerah ini memiliki rata-rata pertumbuhan ekonomi yang sangat tinggi yakni diatas 4,5% (dari tahun 1999 – 2003). Daerah-daerah ini juga memiliki PDRB Perkapita yang tinggi yakni di atas Rp.7 juta pada thun 2003, jauh diatas rata-rata daerah-daerah yang diteliti yakni sebesar Rp.5,3 juta.

Kondisi sebaliknya ditunjukan oleh daerah-daerah yang berada pada peringkat bawah. Dari sisi ekonomi daerah, daerah-daerah ini kurang memiliki *endowment* variabel yang baik. Dari sisi potensi ekonomi sumber daya alam Kab. Dompu, Karangasem, Lombok Timur, Flores Timur, Manggarai dan lain-lain, tidak banyak memiliki potensi sumber daya alam yang cukup memadai. Daerah-daerah ini juga kurang

*existing productive economic activities have raised the public's buying power to Rp.19.5 million. The Human Development Index in this region at 73 far exceeding the national average of 65, is proof of the success of development in this region. Balikpapan's economy is also supported by activity in the mining sector. The city serves as the head office for several multinational mining companies, and so the city has very complete facilities.*

*The regencies of Asahan, Berau, East Kutai, Tabalong, Labuhan Batu, Langkat, and Dairi are all regions with abundant natural resource potential. The economic structure of Asahan Regency can be considered strong and solid. The excellent balance between the primary and secondary sectors has enabled the public's buying power to reach Rp. 11.7 million. With an annual growth rate of 5.4% and a great amount of land available, this region's economy is very attractive.*

*In contrast, the regencies of Purwakarta, Cilacap, Bekasi, and Sidoarjo are regions based on a modern economy with a high level of industrialization, and are well known as centers of industry in Indonesia. These regions, which are in the top ranking in the regional economic dynamism factor, have a very high average rate of economic growth, over 4.5% (from 1999 to 2003). These regions also have a high per capita GRDP, over Rp. 7 million in 2003, far above the average in the regions studied of only Rp. 5.3 million.*

*Entirely the opposite situation is observed in the regions with the lowest rankings. In terms of regional economic dynamism, these regions lack good endowment in any variables. In terms of economic potential from natural resources, the regencies of Dompu, Karangasem, East Lombok, East Flores, Manggarai and several others lack significant natural resource potential. These regions are also underdeveloped because they are not supported by*

berkembang karena kurang didukung oleh aktivitas ekonomi produktif yang dapat mendorong pertumbuhan ekonomi, dan daya beli masyarakat.

Kota-kota yang berada pada peringkat bawah berdasarkan faktor ekonomi daerah, didominasi oleh kota-kota dengan skala kecil dan menengah. Kota-kota ini kebanyakan memiliki posisi yang kurang strategis, dan jauh dengan kota-kota besar lainnya. Keterbatasan akses ke Kota-kota ini mengakibatkan perkembangan ekonominya mengalami keterlambatan. Hal ini kemudian juga mengakibatkan PDRB Perkapita kota-kota seperti Mataram, Banjar Masin, Jambi, atau Palangkaraya menjadi relatif rendah dibandingkan dengan kota-kota lainnya di Indonesia, dan menempatkan mereka pada peringkat bawah berdasarkan faktor ekonomi daerah. *Peringkat Berdasarkan Faktor Ekonomi Daerah secara keseluruhan dapat dilihat pada bagian lampiran 5.*

#### A.5. Peringkat Berdasarkan Faktor Tenaga Kerja & Produktivitas

Dalam aktivitas usaha, selain kapital, dan input produksi, tenaga kerja dipandang sebagai salah satu faktor produksi yang mempunyai peran penting. Tenaga kerja merupakan motor penggerak kegiatan usaha. Dari tiga variabel yang tergabung dalam Faktor Tenaga Kerja dan Produktivitas, terlihat bahwa variabel dan indikator Produktivitas Tenaga kerja memiliki bobot terbesar dalam pertimbangan keputusan berinvestasi oleh para pelaku usaha di suatu daerah. Pada akhirnya produktivitas tenaga kerja yang tinggi merupakan daya tarik yang besar bagi investasi. Hal inilah yang menjadi salah satu penentu peringkat daya tarik investasi suatu daerah. Selain produktivitas tenaga kerja, variabel

*productive economic activity that would support economic growth and the community's buying power.*

*The cities in the lowest ranking for regional economic dynamism are dominated by small and medium-sized cities. Most of these cities are in locations that are not strategic and far from any major cities. This limited access to larger cities causes their economic development to be delayed. In turn, this causes the per capita GRDP in cities such as Mataram, Banjarmasin, Jambi, or Palangkaraya to be relatively lower than in other cities in Indonesia, and gives them lower rankings in the regional economic dynamism factor. Complete Rankings Based on Regional Economic Dynamism can be seen in the Appendix 5.*

#### A.5. Rankings Based on the Labor and Productivity Factor

*In business activities, aside from capital and production input, labor is a production factor that plays a very important role. Labor is the motivator of business activities. Of the three variables included in the Labor and Productivity Factor, it can be seen that the variable and indicators of Labor Productivity have the highest weighting in business operators' considerations when deciding whether to invest in a given region. Ultimately, high labor productivity is a strong attraction for investment. It is therefore a major determinant of a region's investment attractiveness. In addition to labor productivity, the variables of availability of skilled and educated workers, and labor costs, are also important considerations in the decision to invest in a region.*

**Tabel/Table 8.a.**  
**Rata-Rata Skor Faktor Tenaga Kerja & Produktivitas/**  
**Average Scores for Labour and Productivity Factor:**

|                                         | 2003   |      | 2004   |
|-----------------------------------------|--------|------|--------|
| Kab & Kota/ <i>Regencies and Cities</i> | 0,0229 | ■■■■ | 0,0243 |
| Kota/ <i>Cities</i>                     | 0,0291 | ■■■■ | 0,0264 |
| Kabupaten/ <i>Regencies</i>             | 0,0211 | ■■■■ | 0,0205 |

ketersediaan tenaga kerja terampil dan terdidik, serta biaya tenaga kerja juga merupakan pertimbangan penting dalam keputusan berinvestasi di suatu daerah.

**Grafik/Graph.5.**  
**Statistik Kelompok Peringkat Berdasarkan Faktor Tenaga Kerja & Produktivitas/**  
**Ranking Based on the Labour and Productivity Score**

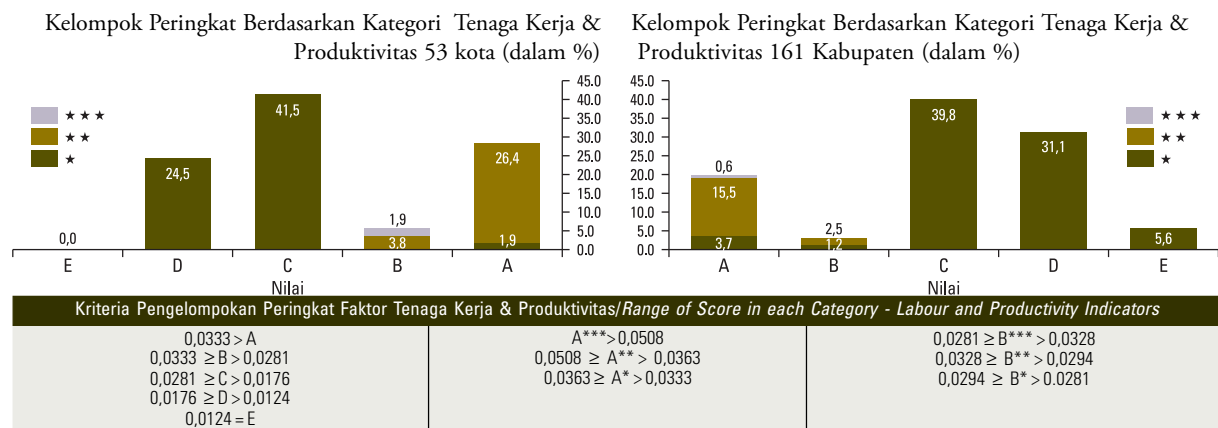

Dari peringkat Faktor Tenaga Kerja dan Produktivitas diketahui bahwa daerah kota dapat menyediakan tenaga kerja yang lebih berkualitas, baik dilihat dari segi pendidikan maupun produktivitasnya, dibandingkan dengan daerah Kabupaten

Berdasarkan faktor Tenaga Kerja dan Produktivitas, daerah kota lebih banyak yang menempati peringkat A dan B, dibandingkan dengan daerah Kabupaten, sebagaimana ditunjukkan pada Grafik 5.

Terbatasnya lapangan kerja di pedesaan mendorong perpindahan tenaga kerja dari desa ke kota. Sementara kegiatan ekonomi kota menuntut tenaga kerjanya lebih produktif daripada di pedesaan. Kedua hal ini penyebab kualitas tenaga kerja di kota lebih baik daripada di kabupaten. Dari Tabel 8.b., terlihat bahwa tidak satupun daerah kota yang berada pada peringkat E.

Kabupaten-kabupaten yang berada di peringkat atas berdasarkan faktor tenaga kerja dan produktivitas, didominasi oleh daerah-daerah yang aktivitas ekonominya relatif lebih maju dibandingkan dengan daerah-daerah lainnya. Di

*From the rankings for the Labor and Productivity Factor, it is evident that cities can provide labor of a higher quality, in terms of both education and productivity, than can regencies.*

*In terms of the Labor and Productivity score, more cities than regencies occupy rankings A and B, as shown in Graph 5.*

*The lack of job opportunities in rural regions stimulates migration of the work force from these regions to the cities. Furthermore, economic activities in the cities demand a more productive work force. These are two reasons why the quality of the work force in the cities is higher than in the regencies. Table 8.b shows that no city region is in ranking cluster E.*

*The regencies in the top ranking for the labor and productivity factor are mostly those regions whose economic activities are relatively more advanced than those of other regions. In these regions, a highly skilled and highly productive work force is available, as the workers are accustomed to production activities in the*

daerah-daerah ini telah tersedia tenaga kerja dengan produktivitas tinggi dan keterampilan yang tinggi, karena telah terbiasa dengan kegiatan produksi di bidang industri. Seperti yang diperlihatkan oleh Kab. Gresik, Tangerang, Serang dan Purwakarta. Kab. Gresik memperoleh peringkat tinggi berdasarkan faktor tenaga kerja dan produktivitas karena merupakan daerah industri dengan standar upah tenaga kerja yang kompetitif. Kegiatan industri dari skala besar hingga kecil yang ada di daerah ini beraglomerasi, hingga mampu menyediakan tenaga kerja terdidik dan produktif dalam jumlah banyak. Daerah-daerah yang memiliki jumlah tenaga kerja yang banyak juga berhasil menempati posisi teratas, seperti Kab. Lahat, Simalungun, Lampung Timur, Lampung Selatan, Tanah Karo, dan sebagainya. Di daerah-daerah tersebut upah tenaga kerja juga yang relatif murah baik dilihat dari ketentuan formal (UMP/UMK) maupun upah aktual yang biasa diberikan oleh pemberi kerja.

*industrial sector. Examples of this are the regencies of Gresik, Tangerang, Serang and Purwakarta. Gresik Regency received a high ranking for the labor and productivity factor because it is an industrial region with a competitive standard of wages. The industrial activities in this region, from large scale down to small scale, are agglomerated, and trained and productive workers are therefore available in large numbers. Regions with large work forces also tend to have high rankings, such as the regencies of Lahat, Simalungun, East Lampung, South Lampung, Tanah Karo, and so on. In these regions, wages are also relatively low, both in terms of the formal provisions (provincial and regency/city minimum wages) and in terms of the actual wages usually paid by employers.*

**Tabel/Table 8.b.**  
**Kelompok Peringkat A dan E Berdasarkan Faktor Tenaga Kerja & Produktivitas/**  
*Best and Worst - Labour and Productivity*

| Kelompok Peringkat/Cluster      |        |                                                                                                                                                                                   |                                                                                                                                                      |                                                                                                |                                                                                                                               |
|---------------------------------|--------|-----------------------------------------------------------------------------------------------------------------------------------------------------------------------------------|------------------------------------------------------------------------------------------------------------------------------------------------------|------------------------------------------------------------------------------------------------|-------------------------------------------------------------------------------------------------------------------------------|
| A***                            |        | A**                                                                                                                                                                               |                                                                                                                                                      | A*                                                                                             | E                                                                                                                             |
| <b>Kota/City</b>                |        | Bandar Lampung<br>Binjai<br>Cirebon<br>Jakarta<br>Kediri<br>Malang<br>Padang                                                                                                      | Palembang<br>Samarinda<br>Sawahlunto<br>Sibolga<br>Sorong<br>Surabaya<br>Tangerang                                                                   | Makassar                                                                                       |                                                                                                                               |
| <b>Kabupaten/<br/>Regencies</b> | Gresik | Badung<br>Bandung<br>Banyuwangi<br>Barito Selatan<br>Batanghari<br>Belitung<br>Bengkalis<br>Bengkulu Selatan<br>Bengkulu Utara<br>Klungkung<br>Kolaka<br>Lahat<br>Lampung Selatan | Lampung Timur<br>Langkat<br>Musi Banyuasin<br>Musi Rawas<br>Pontianak<br>Poso<br>Sanggau<br>Serang<br>Simalungun<br>Solok<br>Tanah Karo<br>Tangerang | Kebumen<br>Bantaeng<br>Bulungan<br>Kendal<br>Pangkajene & Kepulauan<br>Pelalawan<br>Purwakarta | Fakfak<br>Hulu Sungai Utara<br>Kapuas Hulu<br>Karang Asem<br>Pasir<br>Sangihe<br>Sumba Barat<br>Tabanan<br>Timor Tengah Utara |

Kota-kota industri juga mendominasi peringkat atas untuk faktor ketenagakerjaan, seperti Kediri, Tangerang dan lain-lain. Industrialisasi di Kota Kediri telah mendorong peningkatan produktivitas dan kualitas tenaga kerja yang ada. Institusi-institusi pendidikan yang ada mampu menciptakan tenaga kerja dengan kualitas yang memadai. Kemakmuran kota ini, menarik orang dari daerah lain untuk bermigrasi, sehingga menambah ketersediaan tenaga kerja dengan upah yang kompetitif. Sementara, peringkat faktor ketenagakerjaan dan produktivitas diperoleh Kota Padang, karena dilihat dari ketiga variabel pada faktor ini dinilai sangat baik. Kota Padang memiliki ketersediaan tenaga kerja yang besar dengan keterampilan dan pendidikan yang memadai, ditunjang oleh produktivitas yang tinggi. Selain itu upah tenaga kerja di Kota Padang juga kompetitif dibandingkan dengan daerah-daerah kota lainnya. Sementara Kota Jakarta, walaupun memiliki biaya tenaga kerja yang tinggi tetapi berhasil menduduki peringkat ke-3 karena produktivitasnya yang tinggi. Kota Sibolga, mempunyai keunggulan dari sisi biaya tenaga kerja yang relatif murah.

Kab. Hulu Sungai Utara, Karangasem, Kapuas Hulu, Pasir, Bangli, Banggai dan sebagainya merupakan daerah-daerah yang berada pada peringkat terbawah berdasarkan faktor ketenagakerjaan dan produktivitas. Kabupaten-kabupaten yang menempati peringkat terbawah, didominasi oleh daerah-daerah yang memiliki struktur ekonomi yang berbasis pertanian tradisional (pertanian tanaman pangan, perkebunan rakyat, perikanan nelayan kecil), atau perekonomian yang berbasis sumber daya alam lainnya. Kegiatan industri manufaktur dan perdagangan jasa di daerah-daerah tersebut belum berkembang dengan baik di daerah-daerah ini. Hal inilah yang menyebabkan produktivitas tenaga kerja di daerah ini dinilai rendah, karena belum cukup terbiasa dengan kegiatan produksi secara modern. *Peringkat Berdasarkan Faktor Tenaga Kerja dan Produktivitas secara keseluruhan dapat dilihat pada bagian lampiran 6.*

*Industrial cities also dominate the higher rankings for the labor factor, such as Kediri, Tangerang and others. Industrialization in the city of Kediri has spurred an increase in the productivity and quality of the existing work force. The educational institutions there have been able to create a work force of sufficient quality. The city's overall prosperity attracts people from other regions to migrate, thereby adding to the availability of a work force with competitive wages. Similarly, the city of Padang earned a high labor and productivity factor ranking because the three variables within this factor were all given excellent ratings. The city of Padang has available a large work force with adequate levels of skills and education, supported by high productivity. Furthermore, wages in Padang are also competitive with those in other cities. The city of Jakarta managed to win third place in this factor despite its high labor costs, thanks to its high productivity rating. The city of Sibolga has a strong advantage from its relatively low labor costs.*

*The regencies of Hulu Sungai Utara, Karangasem, Kapuas Hulu, Pasir, Bangli, Banggai and so on are regions in the lowest rank for the labor and productivity factor. The regencies in the lowest cluster are dominated by regions with an economic structure based on traditional agriculture (food crop agriculture, smallholders' plantations, small-scale fisheries), or economies based on other natural resources. Manufacturing industry and trade in services have not developed well in these regions. This is why the labor productivity in these regions is rated low: workers are not accustomed to modern production activities. Complete Rankings based on the Labor and Productivity Factor can be seen in the Appendix 6.*

#### A.6. Peringkat Berdasarkan Faktor Infrastruktur Fisik

Infrastruktur Fisik merupakan faktor pendukung bagi kelancaran kegiatan usaha. Ketersediaan dan kualitas infrastruktur fisik ini sangat berpengaruh bagi kelancaran kegiatan usaha yang terjadi di daerah-daerah. Semakin besar skala usaha, maka kebutuhan akan infrastruktur fisik juga semakin besar. Dari hasil pemeringkatan berdasarkan faktor infrastruktur fisik terlihat bahwa daerah-daerah yang berada di pusat pertumbuhan, dan yang termasuk

#### A.6. Rankings Based on the Physical Infrastructure Factor

*Physical infrastructure is a supporting factor for the smooth conduct of business activities. The availability and quality of physical infrastructure strongly affect the continuity of the business activities that take place in a region. The larger the scale of a business, the greater its need for physical infrastructure. The rankings based on the physical infrastructure factor show high scores for regions that lie in growth centers, those in metropolitan areas or support regions for large cities.*

**Tabel/Table 9.a.**

**Rata-Rata Skor Faktor Infrastruktur Fisik/Average Scores for Physical Infrastructure Factor:**

|                                 | 2003   |  | 2004   |
|---------------------------------|--------|--|--------|
| Kab & Kota/Regencies and Cities | 0,0251 |  | 0,0269 |
| Kota/Cities                     | 0,0311 |  | 0,0346 |
| Kabupaten/Regencies             | 0,0234 |  | 0,0245 |

dalam wilayah metropolitan atau daerah penyangga kota-kota besar. Aktivitas bisnis di daerah-daerah ini juga memperlihatkan adanya kegiatan ekonomi modern, dari sektor sekunder hingga sektor tersier. Kebanyakan daerah-daerah yang berada pada peringkat atas ini terletak di pusat-pusat kegiatan ekonomi di Pulau Jawa.

Hasil pemeringkatan tahun 2004 menunjukkan terjadinya perbedaan yang signifikan antara daerah Kabupaten dan daerah Kota. Secara rata-rata kondisi

*Business activities in these regions also show the presence of modern economic activity in the secondary and tertiary sectors. Most of the regions in the top ranking are located in centers of economic activity on the island of Java.*

*The rankings for 2004 show significant differences between regencies and cities. On average, the condition of infrastructure in cities is better than in regencies.*

**Grafik/Graph. 6.**

#### Statistik Kelompok Peringkat Berdasarkan Faktor Infrastruktur Fisik/ Ranking Based on the Physical Infrastructure Score

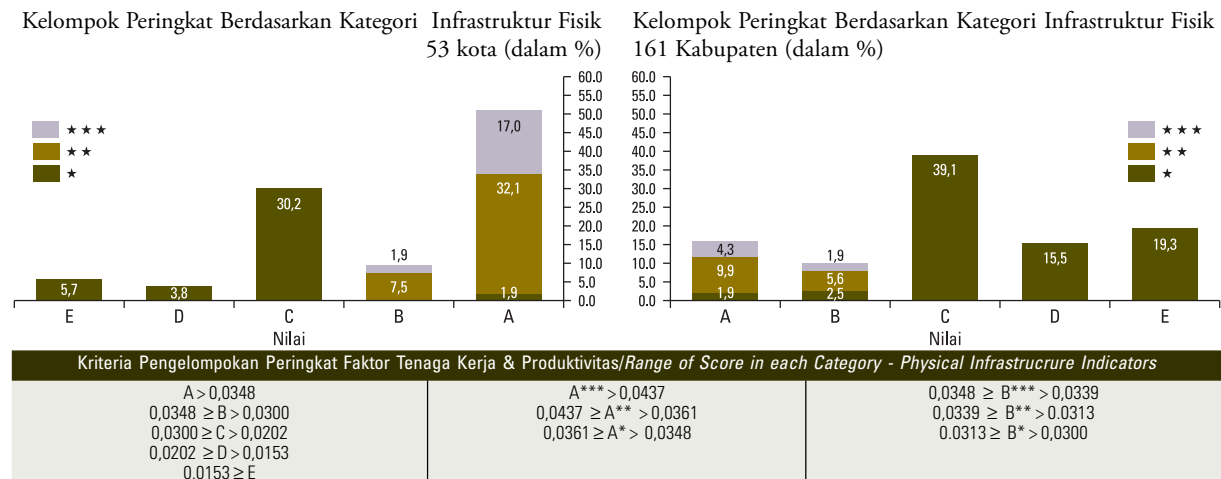

infrastruktur daerah kota lebih baik dibandingkan dengan kabupaten.

Daerah kota memiliki ketersediaan maupun kualitas infrastruktur yang lebih lengkap dan baik dibandingkan dengan daerah kabupaten. Hanya sebagian kecil kota yang ketersediaan dan kualitas infrastruktur fisiknya berada pada peringkat D dan E. Sebaliknya sebagian besar daerah kabupaten berada pada peringkat D dan E (lihat grafik 6).

*Cities, as concentrations of populations with complex economic activities, require better and more complete availability of support infrastructure than do regencies. Only a very small number of cities have availability and quality of physical infrastructure in clusters D and E. In contrast, most of the regencies are ranked D and E (see Graph 6).*

**Tabel/Table 9.b.**  
**Kelompok Peringkat A dan E Berdasarkan Faktor Infrastruktur Fisik/**  
**Best and Worst - Physical Infrastructure**

|                                 | Kelompok Peringkat/Cluster                                                                                                                                                            |                                                                                                                                                                                                                  |                              |                                                                                                                                                                                                                                                                                                                                                                                                                                 |
|---------------------------------|---------------------------------------------------------------------------------------------------------------------------------------------------------------------------------------|------------------------------------------------------------------------------------------------------------------------------------------------------------------------------------------------------------------|------------------------------|---------------------------------------------------------------------------------------------------------------------------------------------------------------------------------------------------------------------------------------------------------------------------------------------------------------------------------------------------------------------------------------------------------------------------------|
|                                 | A***                                                                                                                                                                                  | A**                                                                                                                                                                                                              | A*                           | E                                                                                                                                                                                                                                                                                                                                                                                                                               |
| <b>Kota/City</b>                | Batam<br>Cilegon<br>Denpasar<br>DKI Jakarta<br>Makassar<br>Medan<br>Surabaya<br>Tangerang<br>Tegal                                                                                    | Balikpapan<br>Bandung<br>Bekasi<br>Bogor<br>Gorontalo<br>Kediri<br>Malang<br>Mataram<br>Mojokerto<br>Palembang<br>Pare-pare<br>Pekalongan<br>Probolinggo<br>Semarang<br>Surakarta<br>Tebing Tinggi<br>Yogyakarta | Sukabumi                     | Bengkulu<br>Jayapura<br>Sorong                                                                                                                                                                                                                                                                                                                                                                                                  |
| <b>Kabupaten/<br/>Regencies</b> | Gresik<br>Indramayu<br>Karawang<br>Kudus<br>Mojokerto<br>Pasuruan<br>Tangerang<br>Jepara<br>Jombang<br>Klaten<br>Klungkung<br>Lamongan<br>Pekalongan<br>Serang<br>Sukabumi<br>Tabanan | Badung<br>Banyuwangi<br>Bekasi<br>Blitar<br>Gianyar<br>Gowa<br>Jembrana                                                                                                                                          | Bantul<br>Cirebon<br>Takalar | Barito Selatan<br>Batanghari<br>Bengkalis<br>Bengkulu Selatan<br>Berau<br>Bungo<br>Fakfak<br>Indragiri Hilir<br>Kapuas Hulu<br>Ketapang<br>Kuantan Senggigi<br>Kutai Timur<br>Lampung Utara<br>Luwu<br>Manggarai<br>Morowali<br>Muara Enim<br>Musi Rawas<br>Ngada<br>Pasaman<br>Rokan Hulu<br>Sambas<br>Sanggau<br>Sorong<br>Sumba Barat<br>Tana Toraja<br>Tanjung Jabung Timur<br>Tapanuli Utara<br>Tapin<br>Tebo<br>Toli Toli |

Kota sebagai konsentrasi penduduk dengan aktivitas ekonomi yang kompleks, menuntut ketersediaan infrastruktur pendukung yang lebih

*Given the high density and complex economic activity in Cities, they tend to have better supporting infrastructure available than in the Regencies. Only three*



lengkap dan lebih baik dibandingkan daerah kabupaten. Hanya ada 3 daerah kota yang berada pada kelompok peringkat E, yakni Kota Bengkulu, Kota Jayapura dan Kota Sorong, sebagaimana yang diperlihatkan pada Tabel 9.b.

Kota-kota utama di Indonesia, berhasil menduduki peringkat teratas berdasarkan faktor infrastruktur fisik. Tidak diragukan lagi bahwa kota-kota seperti Jakarta, Surabaya, Medan, Batam, dan Makassar telah memiliki fasilitas yang sangat lengkap, baik dari sisi ketersediaan jalan, sarana transportasi udara, laut, listrik, maupun sarana komunikasi seperti jaringan telepon. Salah satu pendorong kemajuan ekonomi kota-kota tersebut adalah dukungan sarana infrastruktur fisik dengan kualitas terbaik. Dukungan sarana transportasi darat, laut, dan udara, membuat mobilitas manusia, barang dan jasa, intra daerah dan ke luar daerah, menjadi sangat lancar. Jaringan telekomunikasi yang tersedia di setiap jengkal wilayah kota, membuat seolah-olah kota-kota tersebut tidak lagi berjarak dengan belahan dunia lainnya. Hal inilah yang membuat kota-kota tersebut menempati peringkat teratas dilihat dari faktor infrastruktur fisik. Namun perlu diperhatikan juga bahwa, seiring dengan perkembangan kota-kota tersebut, ada sejumlah persoalan yang dapat mengganggu dari sisi ketersediaan infrastruktur fisik. Dengan beban pertumbuhan jumlah penduduk yang tinggi, kota-kota seperti Jakarta, dan Surabaya, menghadapi persoalan kelancaran transportasi darat sebagai akibat kemacetan lalu lintas.

Kabupaten-kabupaten yang menempati peringkat teratas berdasarkan faktor infrastruktur fisik, semuanya berada di Pulau Jawa. Kab. Karawang dan Kab. Tangerang merupakan daerah penyangga dari ibukota negara, dan merupakan daerah sentra industri besar di Indonesia. Di Kab. Karawang, selain zona-zona industri, juga terdapat kawasan industri dan kota industri modern yang terbesar di ASEAN. Ketersediaan jalan darat dengan kualitas baik, memperlancar akses ke sarana perhubungan laut dan udara, maupun ke pusat-pusat kegiatan ekonomi lainnya. Jaringan komunikasi yang tersedia semakin memperlancar

*Cities ranked E for infrastructure, there are Bengkulu City, Jayapura City and Sorong City (see graph. 9.b)*

*The major cities in Indonesia occupy the top rankings in terms of the physical infrastructure factor. It is undeniable that cities such as Jakarta, Surabaya, Medan, Batam, and Makassar have very complete facilities, whether in terms of availability of roads, air and sea transportation and electricity, or of communications facilities such as a telephone network. One stimulant for the economic progress of these cities is the support of better quality physical infrastructure facilities. Support from land, sea, and air transport facilities promotes high mobility of persons, goods and services, both within and between regions. Telecommunication networks that reach to all corners of the cities seem to eliminate the distance between these cities and other parts of the world. It is these facilities that place these cities in the top rankings in terms of the physical infrastructure factor. Yet it must be noted that together with the growth of these cities, there are also certain potential problems with the availability of physical infrastructure. With the burden of rapid population growth, cities such as Jakarta and Surabaya face problems with smooth land transportation due to traffic congestion.*

*All of the regencies that occupy the top rankings in the physical infrastructure factor are located on the island of Java. Karawang Regency and Tangerang Regency are support regions for the national capital, and are the largest industrial centers in Indonesia. Karawang Regency, in addition to industrial zones, has the largest modern industrial zone and industrial city in ASEAN. The existence of high quality roads facilitates access to sea and air transport facilities, and also to other centers of economic activity. The available communication networks also facilitate communications with other regions.*

hubungan dengan daerah lainnya.

Demikian pula yang dengan Kab. Gresik, Mojokerto, Pasuruan, Lamongan dan Jombang, juga merupakan daerah yang berdekatan dengan pusat pertumbuhan ekonomi di Jawa Timur. Di Jawa Tengah diwakili oleh Kab. Kudus, dan Jepara, yang merupakan daerah yang berbasis industri. Daerah-daerah tersebut di atas memiliki infrastruktur fisik yang memadai, dan akses yang lancar ke pelabuhan laut maupun udara, sehingga memudahkan mobilitas kegiatan usaha pebisnis di daerah-daerah ini. Daerah-daerah ini memiliki keuntungan sebagai dampak aglomerasi dengan pusat-pusat kegiatan ekonomi di daerah sekitarnya. Dengan demikian terjadi sharing fasilitas di antara daerah-daerah ini dengan daerah-daerah di sekitarnya.

Berbeda dengan daerah-daerah yang berada di peringkat atas, daerah-daerah yang menempati peringkat bawah, rata-rata adalah daerah yang jauh dengan pertumbuhan ekonomi dan aktivitas ekonomi. Kota-kota dengan skala kecil seperti Kota Sorong, Bengkulu, dan Jayapura, menempati peringkat terbawah dilihat dari faktor infrastruktur fisik. Kota-kota ini kurang berkembang karena lokasinya yang kurang strategis, dan tidak banyak kegiatan ekonomi produktif yang dapat memacu perkembangan kota, sehingga perkembangan sarana dan prasarana fisiknya juga kurang maju.

Kabupaten-kabupaten yang berada di luar Pulau Jawa, seperti Kalimantan, Papua, NTT, dan daerah pelosok lainnya mendominasi peringkat terbawah untuk faktor infrastruktur fisik. Kab. Kutai Timur, meskipun memiliki potensi sumber daya alam yang melimpah, tetapi tidak didukung oleh infrastruktur fisik yang memadai, baik berupa jalan darat, laut, maupun udara. Di daerah ini juga masih dinilai kekurangan sumber energi listrik maupun jaringan komunikasi. Hal yang relatif sama terjadi pada Kab. Rokan Hulu, Bengkulu Selatan, Fak-fak di Papua, Sanggau di Kalimantan Barat dan lainnya. *Peringkat berdasarkan faktor infrastruktur fisik secara keseluruhan dapat dilihat pada bagian lampiran 7.*

*Similarly, the regencies of Gresik, Mojokerto, Pasuruan, Lamongan, and Jombang are regions located near the economic growth centers in East Java. Central Java is represented by the regencies of Kudus and Jepara, regions with an industrial basis. These regions have adequate physical infrastructure and smooth access to seaports and airports, which ease the mobility for business activities of business operators in these regions. These regions have advantages resulting from their agglomeration with centers of economic activity in nearby regions; this produces a sharing of facilities between these regions and the nearby regions.*

*Unlike the regions in the top rankings, the regions in the lowest rankings are generally located far from the centers of economic growth and economic activity. Smaller cities such as Sorong, Bengkulu and Jayapura hold the lowest rankings for the physical infrastructure factor. These cities are underdeveloped because their locations are not very strategic, and there is little productive economic activity to stimulate the cities' growth; consequently, their physical facilities and infrastructure are underdeveloped as well.*

*Regencies outside the island of Java, such as those in Kalimantan, Papua, NTT, and other outlying regions, dominate the lowest rankings for the physical infrastructure factor. East Kutai Regency, despite its abundant natural resources, lacks the support of adequate physical infrastructure for land, water, or air transport. This region is also rated as lacking in electric power and communication networks. Much the same situation prevails in the regencies of Rokan Hulu, South Bengkulu, Fak-fak in Papua, Sanggau in West Kalimantan, and the others. Complete Rankings based on the Physical Infrastructure Factor can be seen in the Appendix 7.*

## B. PERUBAHAN PENINGKATAN DAYA TARIK INVESTASI

Dengan membandingkan hasil rating tahun 2003 dan 2004 akan diketahui seberapa banyak daerah-daerah yang mengalami perubahan peringkat. Perubahan peringkat ini baik yang mengalami peningkatan maupun penurunan peringkat. Dari perbandingan hasil peringkat selama dua tahun juga akan diketahui perkembangan kinerja daerah-daerah dalam menciptakan iklim yang kondusif bagi kegiatan usaha.

## B. CHANGES IN THE INVESTMENT ATTRACTIVENESS RANKINGS

*By comparing the results of the ratings for 2003 and 2004, we can see how many regions have experienced changes in their rankings, whether improvements or declines. The comparison of rankings between these two years will also show the progress of the regions' performance in creating a conducive climate for business activities.*

**Tabel/Table 10.a.**  
**Statistik Perubahan Peringkat/Statistics of Changes in Ranking**

|                                       |                     | Kota/Kab./<br>Overall | Kota/Cities | Kabupaten/<br>Regencies |
|---------------------------------------|---------------------|-----------------------|-------------|-------------------------|
| <b>Meningkat/:</b><br><i>Improved</i> | - B ▮▮▮▮ <b>A :</b> | 5                     | 3           | 2                       |
|                                       | - C ▮▮▮▮ <b>A :</b> | 16                    | 8           | 8                       |
| <b>Turun/:</b><br><i>Declined</i>     | - A ▮▮▮▮ <b>B :</b> | 10                    | 1           | 9                       |
|                                       | - A ▮▮▮▮ <b>C :</b> | 14                    | 1           | 13                      |

Persentase Kota yang mengalami peningkatan peringkat lebih banyak dibandingkan dengan Kabupaten. Demikian juga dengan persentase Kota yang mengalami penurunan peringkat lebih sedikit dibandingkan dengan Kabupaten. Jumlah daerah yang mengalami peningkatan peringkat dari C ke A, untuk daerah Kota sebanyak 8 daerah,

*The percentage of cities experiencing improvements in rankings is greater than that of regencies. Similarly, a smaller percentage of cities than of regencies experienced declines in rankings. Eight cities had rankings that improved from C to A, as did eight regencies.*

**Tabel/Table 10.b.**  
**Daerah Yang Mengalami Peningkatan Dari Kelompok Peringkat C Pada Tahun 2003 Menjadi Berada Pada Kelompok Peringkat A Pada Tahun 2004 Berdasarkan Kategori Umum/  
Regions Experiencing Overall Improvement From Ranking C in 2003 to Ranking A in 2004**

| No. | Kota/Cities        | No. | Kabupaten/Regencies |
|-----|--------------------|-----|---------------------|
| 1   | Kota Dumai         | 1   | Kab. Cilacap        |
| 2   | Kota Jakarta       | 2   | Kab. Gresik         |
| 3   | Kota Madiun        | 3   | Kab. Karawang       |
| 4   | Kota Malang        | 4   | Kab. Kudus          |
| 5   | Kota Palembang     | 5   | Kab. Lampung Barat  |
| 6   | Kota Pare-Pare     | 6   | Kab. Majene         |
| 7   | Kota Tanjung Balai | 7   | Kab. Musi Banyuasin |
| 8   | Kota Tegal         | 8   | Kab. Pinrang        |

sementara untuk Kabupaten sebanyak 8 daerah.

Kabupaten Kudus di Jawa Tengah dan Kota Pare-Pare di Sulawesi Selatan memperbaiki kualitas pelayanan perizinan kepada para pelaku usaha dengan menerapkan sistem pelayanan satu atap. Kota Parepare merupakan salah satu daerah yang mengalami lonjakan peringkat secara pesat. Keberhasilan Parepare meningkatkan peringkatnya ini disebabkan oleh beberapa kebijakan inovatif yang dilakukan oleh pemerintah daerah. Di bidang birokrasi perizinan, pelayanan investasi dilakukan melalui SINTAP yang memperoleh sertifikat ISO 9001, menjadikan pelayanan perizinan investasi di kota ini semakin prima. Aspek sosial politik juga mengalami kemajuan yang cukup berarti. Kondisi sosial politik yang kian mantap, dengan jarang ditemukannya gangguan keamanan usaha, maupun keamanan di lingkungan masyarakat. Sementara aspek tenaga kerja juga mengalami peningkatan. Berbagai infrastruktur yang disediakan oleh pemko, seperti perbaikan pelabuhan laut, penyediaan kawasan industri, dan jalan-jalan yang menghubungkan antar daerah dan yang menghubungkan berbagai pusat kegiatan ekonomi semakin memperlancar kegiatan usaha di daerah ini. Berbagai inovasi yang dilakukannya, telah mendongkrak peringkat daya tarik investasinya dari kategori C menjadi A\*\*\*.

Pada kelompok kabupaten, Kab. Kudus, juga mengalami lonjakan peringkat secara pesat. Respon pemda yang cepat dalam mengatasi permasalahan-permasalahan sosial membuat kabupaten ini nyaman untuk kegiatan investasi. Aksi unjuk rasa karyawan pabrik yang terjadi pada tahun 2003, mampu diatasi dengan segera sehingga tidak berkembang ke arah yang distoratif. Pembentukan Kantor Penanaman Modal dan Pelayanan Perizinan Terpadu, yang berwenang memberikan berbagai perizinan usaha, mempermudah pengurusan izin usaha. Sistem pelayanan satu atap di Kab. Kudus merupakan contoh yang baik dalam proses pelayanan perizinan usaha yang dapat ditiru oleh kabupaten / kota lainnya. Kantor Penanaman Modal dan Pelayanan Perizinan Terpadu (PMPPT) di Kab. Kudus dikepalai oleh eselon satu yang mempunyai kewenangan penuh untuk menerima

*The city of Parepare is one region that has shown a great leap in its ranking. Parepare's success in improving its ranking was the result of several innovative policies undertaken by the local government. In permitting procedures, investment services are conducted through the "SINTAP" One-Stop Permit Processing System, which has earned ISO 9001 certification, greatly improving the investment permitting service in the city. The social-political aspect has also shown significant progress. The social-political situation is increasingly solid; disturbances to business security or to public security are seldom encountered. The labor aspect has also shown improvement. Various types of infrastructure provided by the city government, such as improvements to the seaport, provision of an industrial zone, and roads connecting the regions and leading to the various centers of economic activity have all accelerated business activities in this region. These innovations have boosted Parepare's investment attractiveness ranking from category C to A\*\*\*.*

*In the regency group, Kudus Regency has also shown a leap in its ranking. The regional government's speedy response in overcoming social problems has made this regency safe and secure for investment activities. The demonstrations by factory workers that took place in 2003 were promptly handled and therefore did not lead to economic distortions. The establishment of an Integrated Investment and Permitting Services Office, with the authority to issue various types of business permits, has greatly eased the arrangement of business permits. In terms of labor matters, the regional government continually strives to improve the quality of the labor force by providing various types of training. These training programs conducted by the regional government have helped to improve the quality of the region's work force. These efforts by the regional government have succeeded in raising the regency's investment attractiveness ranking from C to A\*\*\*.*

atau menolak permohonan izin usaha, sehingga proses perizinan menjadi lebih cepat. Pada kasus ini kemauan baik dari aparat pelayanan publik dan didukung penuh dinas-dinas terkait merupakan faktor penting dalam keberhasilan penerapan pelayanan terpadu di Kab. Kudus. Dalam aspek ketenagakerjaan, pemda senantiasa berupaya meningkatkan perbaikan kualitas dengan melakukan berbagai pelatihan. Berbagai pelatihan ketenagakerjaan yang dilakukan oleh Pemda, mampu meningkatkan kualitas tenaga kerja di daerah ini. Hasil kerja pemda mampu meningkatkan peringkat daya tarik investasinya dari C ke A\*\*\*. *Perubahan peringkat seluruh daerah-daerah yang di peringkat dapat dilihat pada bagian lampiran 2 - 8.*

*Changes in rankings for all regions that were rated can be seen in the Appendix 2 - 8.*

---

## V. Penutup

### *Conclusion*

Hasil pemeringkatan daya tarik investasi kabupaten / kota tahun 2004 dapat memberikan gambaran umum bagaimana iklim investasi yang ada di berbagai daerah selama tahun 2004. Dengan membandingkan hasil pemeringkatan tahun 2004 dengan tahun sebelumnya diperoleh gambaran perkembangan berbagai indikator penentu daya tarik dari tiap-tiap daerah. Dengan demikian akan diketahui faktor-faktor apa saja yang mengalami peningkatan dan faktor-faktor apa saja yang mengalami kemunduran. Dari hasil pemeringkatan dan penelusuran di lapangan dapat diambil beberapa catatan penting sebagai berikut :

#### A. KESIMPULAN

1. Secara umum pada tahun 2004 terjadi peningkatan daya tarik investasi kabupaten dan kota di Indonesia. Hal ini terlihat dari peningkatan rata-rata skor yang diperoleh kabupaten dan kota yang mengalami peningkatan dibandingkan dengan hasil pemeringkatan tahun 2003.
2. Berdasarkan peringkat daya tarik investasi secara umum diperoleh hasil bahwa daerah kota memiliki peringkat yang lebih baik dibandingkan dengan daerah kabupaten. Hal

*The investment attractiveness rating of cities and regencies for 2004 provide an overall picture of the investment climate. By comparing the rankings for 2004 with those of previous years, we can obtain a picture of developments in the various determinants of investment attractiveness in each region. In this way, we can recognize which factors have shown improvements and which have shown declines. From the rankings and from investigations in the field, several important points can be noted, as follows:*

#### A. CONCLUSIONS

1. *Overall, in 2004 there has been an improvement in the investment attractiveness of regencies and cities in Indonesia. This can be seen from the average increase in the scores achieved by regencies and cities compared with the ratings for 2003.*
2. *The overall investment attractiveness rankings show that cities have higher ratings than regencies. This can be seen from the average scores attained by cities and from the high percentage of cities*

ini terlihat dari rata-rata skor yang berhasil dicapai oleh daerah kota maupun dari banyaknya prosentase daerah kota yang berada ada peringkat A dan B, dan tidak satupun daerah kota yang berada pada peringkat E.

3. Terjadi peningkatan kinerja kelembagaan pemerintah daerah pada tahun 2004 dibandingkan dengan tahun 2003. Hal ini terlihat dari rata-rata skor faktor kelembagaan kota maupun kabupaten yang mengalami peningkatan. Rata-rata skor dan peringkat kabupaten berdasarkan faktor kelembagaan lebih baik dibandingkan dengan peringkat kota berdasarkan faktor kelembagaan. Namun demikian berdasarkan faktor kelembagaan pada hasil pemeringkatan tahun 2004 tidak satupun daerah baik kota maupun kabupaten yang berhasil mencapai peringkat A\*\*\*.

4. Pada tahun 2004 masih dijumpai sejumlah persoalan terkait dengan faktor kelembagaan terutama masalah kepastian hukum. Para pelaku usaha harus menanggung pungutan liar dari berbagai pihak (preman, aparat keamanan, organisasi sosial kemasyarakatan, proses peradilan, dll) yang jumlahnya mencapai rata-rata sebesar 6.81% dari total biaya produksi. Dalam pelayanan perizinan usaha, para pelaku usaha juga harus membayar tambahan biaya tidak resmi yang besarnya rata-rata mencapai 64.25% dari biaya yang seharusnya ditanggung. Dan 1.6% responden mengaku harus membayar tambahan biaya tidak resmi hingga 500% dari biaya yang diatur berdasarkan ketentuan formal.

5. Masih ditemukan sejumlah perda di berbagai daerah yang mendistorsi kegiatan usaha. Berdasarkan penelusuran lapangan 24.6% pelaku usaha yang menjadi responden dalam penelitian ini menyatakan bahwa kegiatan usaha mereka terdistorsi oleh perda-perda yang dikeluarkan oleh pemerintah daerah. Hal ini sejalan dengan hasil kajian KPPOD terhadap 1.025 perda dimana 30,15% berpotensi

*ranking in clusters A and B, with not one city ranking in group E.*

3. *The performance of regional government institutions improved during 2004 compared with 2003. This can be seen from the average scores for the institutional (government services) category, in which both cities and regencies showed improvement. The average scores and rankings for regencies based on the institutional category were better than those for cities. However, not one city or regency achieved an A\*\*\* ranking in the institutional category in 2004.*

4. *Various problems were still encountered in 2004 in connection with the institutional category, primarily with regard to issues of legal certainty. Business operators had to pay illegal levies to various parties (hoodlums, security officials, community social organizations, legal processes, etc.), in amounts averaging 6.81% of their total production costs. For business permitting services, business operators also had to pay additional, unofficial fees, which averaged 64.25% on top of the official fees. Furthermore, 1.6% of respondents stated that they had to pay unofficial fees of up to 500% of the officially declared rates for business permits.*

5. *There are still a number of local regulations that distort business activities. According to investigations in the field, 24.6% of business operators who were respondents in this research stated that their business activities were distorted by the local regulations issued by regional governments. This accords with the results of a Regional Autonomy Watch study of 1,025 local regulations, which showed that 30.15% of these*

mendistorsi aktivitas usaha.

*had the potential to distort business activities.*

6. Banyaknya perda yang bermasalah ini, terkait dengan proses perumusan perda yang kurang partisipatif. 86.4% responden menyatakan tidak pernah dilibatkan dalam perumusan kebijakan daerah. Sementara dari 12% yang menyatakan dilibatkan dalam perumusan kebijakan daerah, 59.6% di antaranya menilai bahwa kualitas pelibatan dunia usaha dalam perumusan perda tidak baik, dan 8.1% biasa saja, dalam artian hanya sebatas ikut dalam sosialisasi ketika rancangan perda telah siap untuk disahkan.
  7. Hasil pemeringkatan berdasarkan faktor sosial politik menunjukkan bahwa kondisi sosial politik di tahun 2004 relatif lebih baik dibandingkan dengan tahun 2003. Secara rata-rata kondisi sosial politik kabupaten sedikit lebih baik dibandingkan dengan daerah kota.
  8. Secara umum kondisi keamanan daerah-daerah di Indonesia, kondusif untuk kegiatan investasi. Hal ini dinyatakan oleh 92% responden pelaku usaha yang menyatakan bahwa kondisi keamanan di daerah mereka melakukan usaha aman untuk kegiatan investasi, dan hanya 7.4% yang menyatakan mengalami gangguan keamanan dalam usaha mereka. Dari para pelaku usaha yang menyatakan mengalami gangguan keamanan diketahui bahwa gangguan keamanan yang biasa dialami oleh para pelaku usaha diantaranya adalah : pencurian di lokasi usaha (25% responden); penghadangan di jalan (9%); perusakan asset (7.9%); dan penjarahan (3.1%).
  9. Khusus untuk indikator kondisi politik daerah, di tahun 2004 mengalami sedikit guncangan, dimana terjadi peningkatan suhu politik di berbagai daerah. Hal ini terkait dengan penyelenggaraan pesta demokrasi pemilihan presiden dan legislative secara langsung. Dari penelusuran penelitian lapangan, 15.6% pelaku usaha menyatakan bahwa aktivitas usaha
6. *This large number of problematic local regulations is related to the lack of public participation in the process of their formulation. 86.4% of respondents said that they were never involved in the formulation of regional policies. And of the 12% who said that they were so involved, 59.6% felt that the quality of involvement of the business community in formulation of local regulations was poor, while 8.1% said it was just average, meaning that their involvement was limited to receiving information after the draft regulations were already about to be ratified.*
  7. *The rankings for the social-political factor showed that social-political conditions in 2004 were relatively better than in 2003. On average, social-political conditions in the regencies were slightly better than in cities.*
  8. *Overall, security conditions in the regions of Indonesia are conducive for investment activity. This was the perception of 92% of business operator respondents, who said that the security conditions in the regions where they conduct their business activities were safe for investment activities, while only 7.4% stated that they had experienced security disturbances in their businesses. From those business operators who said they had experienced security disturbances, it was found that the problems they experienced included thefts at the place of business (25% of respondents), robberies on the road (9%), damage to assets/ vandalism (7.9%), and looting (3.1%).*
  9. *In the indicator of regional political conditions, there was some volatility during 2004 as the political temperature rose in many regions. This was related to the "festival of democracy": legislative elections at all levels and Indonesia's first-ever direct presidential elections. Investigations in the field showed that 15.6% of business operators stated that their business activities were disrupted*



mereka terganggu oleh kondisi politik di daerah. Sebanyak 7% pelaku usaha juga menyatakan bahwa hubungan eksekutif dan legislative yang tidak harmonis di sejumlah daerah, telah menghambat pelayanan birokrasi terhadap pelaku usaha. Sementara 9% responden menyatakan terganggu oleh aktivitas unjuk rasa yang dilakukan oleh berbagai kalangan selama tahun 2004.

*by political conditions in their regions. Seven percent of business operators also said that unharmonious relations between the executive and legislative branches had impeded government services to business operators. And 9% of respondents stated that they were disturbed by demonstrations conducted by various groups during 2004.*

10. Secara umum kondisi ekonomi daerah perkotaan lebih baik dibandingkan dengan daerah perkotaan. Kondisi ekonomi daerah perkotaan di tahun 2004 mengalami perbaikan, sementara untuk daerah kabupaten justru mengalami penurunan. Mayoritas daerah kota berada pada peringkat A dan B, dan tidak satupun kota yang berada pada peringkat E, sementara daerah kabupaten lebih banyak pada peringkat D dan E.

*10. Overall, economic conditions in cities are better than in regencies. Economic conditions in cities showed improvement during 2004; in contrast, they declined in regencies. A majority of cities were ranked in clusters A and B, and no city was ranked in cluster E, whereas most regencies were ranked in clusters D and E.*

11. Rata-rata PDRB perkapita kota sebesar Rp. 11,42 Juta, sedangkan kabupaten hanya sebesar Rp.5,25 Juta. Sementara rata-rata pertumbuhan ekonomi kota sebesar 4.9%, sementara kabupaten hanya 2.3%. Hal ini penyebab peringkat faktor ekonomi kota lebih baik dibandingkan kabupaten.

*11. The average per capita GDRP in cities was Rp. 11.42 Milion, while in regencies it was only Rp.5.25 Milion. The average rate of economic growth in cities was 4.9%, and in regencies only 2.3%. For this reason, the ranking for economic factors were higher for cities than for regencies.*

12. Kondisi ketenagakerjaan daerah perkotaan juga lebih baik dibandingkan dengan daerah kabupaten. Berdasarkan faktor Tenaga Kerja dan Produktivitas, daerah kota lebih banyak yang menempati peringkat A dan B, dibandingkan dengan daerah kabupaten.

*12. Labor conditions in urban regions are also better than in regencies. In the Labor and Productivity factor, more cities than regencies were ranked A and B.*

13. Yang menyebabkan kualitas dan ketersediaan tenaga kerja kota lebih baik dibandingkan dengan kabupaten adalah, terbatasnya lapangan kerja di pedesaan mendorong perpindahan tenaga kerja dari desa ke kota. Sementara kegiatan ekonomi kota menuntut tenaga kerjanya lebih produktif daripada di pedesaan.

*13. One reason why the quality and availability of the labor force in cities is better than in regencies is that the lack of job opportunities in rural regions encourages labor migration from these regions to the cities. Likewise, the economic activities in cities require a more productive work force than is needed in rural areas.*

14. Daerah-daerah yang berada di pusat kegiatan

*14. Regions located in and near the centers of economic*

ekonomi dan industri dan sekitarnya mendominasi peringkat atas berdasarkan faktor infrastruktur fisik. Daerah-daerah ini memperoleh manfaat dari efek aglomerasi dengan *sharing* infrastruktur antar daerah yang saling berdekatan.

*and industrial activity dominated the top rankings for the physical infrastructure factor. These regions reaped the benefit of the agglomeration effect by sharing infrastructure with neighboring regions. Locations on Java and Bali benefited from high investment levels during the New Order era that continue to provide them with better infrastructure than the outer areas.*

15. Kota sebagai konsentrasi penduduk dengan aktivitas ekonomi yang kompleks, menuntut ketersediaan infrastruktur pendukung yang lebih lengkap dan lebih baik dibandingkan daerah kabupaten. Hanya ada 3 daerah kota yang berada pada kelompok peringkat E, yakni Kota Bengkulu, Kota Jayapura dan Kota Sorong. Dengan demikian secara rata-rata peringkat berdasarkan faktor infrastruktur fisik daerah kota lebih baik dibandingkan dengan kabupaten.

15. *Cities, as concentrations of population with complex economic activities, require the availability of better and more complete support infrastructure than is needed in regencies. Only three cities fell into ranking cluster E: Bengkulu, Jayapura, and Sorong. Thus, on average, the rankings for the physical infrastructure factor for cities were better than those for regencies.*

16. Secara keseluruhan, prosentase Kota yang mengalami peningkatan peringkat lebih banyak dibandingkan dengan Kabupaten. Demikian juga sebaliknya, prosentase Kota yang mengalami penurunan peringkat lebih sedikit dibandingkan dengan Kabupaten.

16. *Overall, the percentage of cities experiencing improvements in their rankings was higher than for regencies. Similarly, the percentage of cities experiencing declines in their rankings was lower than for regencies.*

17. Ada 16 daerah (8 kota dan 8 kabupaten) yang mengalami lonjakan peringkat secara drastic yaitu dari peringkat C ke peringkat A. Hal ini memberikan indikasi bahwa upaya perbaikan pelayanan publik yang dilakukan oleh ke-16 pemerintah daerah selama setahun terakhir, oleh para penerima jasa layanan - dalam hal ini para pelaku usaha - telah dirasakan perbaikannya secara signifikan. Kabupaten Kudus di Jawa Tengah dan Kota Pare-Pare di Sulawesi Selatan memperbaiki kualitas pelayanan perizinan kepada para pelaku usaha dengan menerapkan sistem pelayanan satu atap. Sistem pelayanan satu atap di Kab. Kudus merupakan contoh yang baik dalam proses pelayanan perizinan usaha yang dapat ditiru oleh kabupaten / kota lainnya. Kantor Penanaman Modal dan Pelayanan Perijinan

17. *Sixteen regions (eight cities and eight regencies) experienced dramatic leaps in their rankings from C to A. This indicates that the efforts to improve public services undertaken by these sixteen regional governments over the past year have led to significant improvements as felt by the recipients of these services, in this case business operators. The regencies and cities are among others Kudus Regency of Central Java and Pare Pare of South Sulawesi that improved their government services quality in business licensing process through the implementation of one-stop-service (OSS). In case of Kudus for example, having learned better service in business licensing process through the implementation of OSS in other regencies/cities, one of the senior officer (now become the head of OSS Office) were success in convincing the Regent to replicate OSS in Kudus by giving full authority*

Terpadu (PMPPT) di Kab. Kudus dikepalai oleh eselon satu yang mempunyai kewenangan penuh untuk menerima atau menolak permohonan izin usaha, sehingga proses perizinan menjadi lebih cepat. Pada kasus ini kemauan baik dari aparat pelayanan publik dan didukung penuh dinas-dinas terkait merupakan faktor penting dalam keberhasilan penerapan pelayanan terpadu di Kab. Kudus.

## B. SARAN

1. Walaupun kondisi kelembagaan secara rata-rata mengalami perbaikan namun perlu kiranya daerah-daerah terus meningkatkan kinerja kelembagaannya untuk mendorong iklim usaha yang lebih kondusif lagi.
2. Perbaikan pelayanan publik perlu dilakukan oleh daerah-daerah dalam rangka meningkatkan kualitas pelayanan birokrasi terhadap dunia usaha, agar tercipta pelayanan yang prima, mudah, murah dan cepat yang menggambarkan efektivitas dan efisiensi sebagaimana tuntutan dunia usaha. Pembentukan pelayanan birokrasi pelayanan publik dengan sistem *one stop service* yang memberi kemudahan dalam pelayanan perizinan usaha perlu direplikasikan di daerah-daerah otonom lainnya.
3. Daerah-daerah perlu mengenali faktor-faktor kelemahan dalam menarik investasi di daerahnya, agar dapat dilakukan perbaikan. Selain itu juga perlu dilakukan penelusuran lebih dalam faktor-faktor, variabel, atau indikator yang menjadi kekuatan dari daerah lainnya, untuk dikembangkan di daerahnya dalam rangka meningkatkan daya tarik investasinya.
4. Pelibatan dunia usaha dan *stakeholders* lainnya dalam setiap perumusan kebijakan publik merupakan syarat mutlak agar tercipta sebuah pemerintahan yang akuntabel dan transparan, serta terwujudnya kebijakan publik yang

*to the OSS office to accept or reject the application of business permit. In this case, the initial initiative from civil servant became the most significant factor to realize the implementation of OSS; on the other hand, the strong political back-up from the Regent switched the initial resistance of other service office (dinas) to be full support of this OSS implementation.*

## B. RECOMMENDATIONS

1. *Although improvements have been seen in governance indicators, regional governments still need to continue to improve their institutional performance in order to promote an even more conducive climate for business.*
2. *Local governments need to upgrade their service standards in order to improve the quality of government services to the business community, so as to provide top-rate, simple, inexpensive, and speedy services in line with the business community's need for effectiveness and efficiency. The public service centers using the one-stop service system, which provides ease in business permitting services, need to be replicated in other autonomous regions.*
3. *Local governments need to recognize the factor/s in which they are weak in attracting investment so that they can make improvements in these areas. Regions also need to carry out more in-depth studies of the factors, variables, and indicators of this study that are the strengths of other regions, so that these can be developed in their own regions in order to improve their investment attractiveness.*
4. *Positive practices in the conduct of good governance that are employed in other regions, such as transparency and public participation, need to be replicated and developed in each region in line with local characteristics.*

berkualitas dan dapat diterima oleh setiap pihak. Praktik-praktik positif dalam penyelenggaraan pemerintahan yang baik yang dilakukan oleh daerah lainnya, seperti transparansi dan partisipasi publik perlu direplikasikan dan dikembangkan di daerahnya sesuai dengan karakteristik masyarakat di daerahnya.

5. Peningkatan kapasitas fiskal daerah tidak harus dilakukan dengan menggenjot PAD dengan membuat berbagai pungutan daerah yang justru malah akan mendistorsi kegiatan usaha. Peningkatan kapasitas fiskal dapat dilakukan dengan melakukan kerjasama dengan pihak ketiga dan mendorong masuknya investasi yang akan mendatangkan *multiplier effect*, demi peningkatan kesejahteraan masyarakat.
6. Untuk meningkatkan daya tarik investasi daerah perlu dilakukan kerjasama antar daerah dan membentuk iklim investasi yang mencakup kawasan tertentu. Keuntungan dari kerjasama antar daerah ini adalah dapat memperoleh efek aglomerasi yang salah satunya adalah *sharing* infrastruktur, *sharing* informasi dan keterkaitan ekonomi antar daerah.
7. Perbaikan sarana fisik dan pembangunan infrastruktur baru sebagai pendukung kegiatan usaha mutlak untuk terus dilakukan, mengingat bahwa ketersediaan dan kualitas infrastruktur fisik ini mampu mendorong tumbuhnya aktivitas usaha baru dan mendatangkan *multiplier effect* yang besar.
8. Mengingat bahwa sebagian besar daerah yang memperoleh peringkat tinggi adalah daerah-daerah yang berada di sekitar pusat-pusat pertumbuhan ekonomi, maka perlu dikembangkan pusat-pusat pertumbuhan

*The involvement of the business community and other stakeholders in formulation of public policy is an absolute prerequisite for the creation of accountable and transparent government and of high-quality public policies that are acceptable to all.*

5. *Local government should be aware that boosting regionally-generated revenue through various types of local levies can distort business activities. Increased revenue should preferably be obtained by encouraging the entry of new investment which will bring it a multiplier effect that improves public welfare. The central government should reconsider current policy on land tax, which continues to accrue to the central government. Property tax is the primary source of local government revenue in most other countries.*
6. *To improve their investment attractiveness, regions need to engage in inter-regional cooperation and create an investment climate that encompasses a larger area. One advantage of inter-regional cooperation is the agglomeration effect, leading to sharing of infrastructure, sharing of information, and economic interrelationships between the regions concerned. Province governments can play a more active role in promoting cooperation. Special attention should be paid to removing barriers to domestic trade.*
7. *Improvements to physical infrastructure and construction of new infrastructure as the support for business activities are essential, given that the availability and quality of physical infrastructure promotes growth in new business activities and brings with it a strong multiplier effect.*
8. *As most of the regions that achieved high rankings are regions that are located in or near centers of economic growth, new centers of economic growth need to be developed, of the more developed islands of Java and Bali.*

ekonomi baru, untuk mendorong pertumbuhan ekonomi daerah di kawasan tertentu secara terpadu. Upaya pembentukan pusat-pusat pertumbuhan ekonomi tersebut akan dapat terwujud dengan baik apabila beberapa rekomendasi di atas dijalankan secara konsisten.

**Lampiran 1 : Statistik Daerah Penelitian/Statistic of Rating Area**
**1. Berdasarkan Propinsi, Kabupaten dan kota**

| NO             | PROPINSI            | KABUPATEN<br>(N=161) |      | KOTA<br>(N=53) |      | TOTAL<br>(N=214) |      |
|----------------|---------------------|----------------------|------|----------------|------|------------------|------|
|                |                     | Jumlah               | %    | Jumlah         | %    | Jumlah           | %    |
| 1              | Sumatera Utara      | 8                    | 5.0  | 6              | 11.3 | 14               | 6.5  |
| 2              | Sumatera Barat      | 4                    | 2.5  | 2              | 3.8  | 6                | 2.8  |
| 3              | Riau                | 6                    | 3.7  | 2              | 3.8  | 8                | 3.7  |
| 4              | Kepulauan Riau      | 0                    | 0.0  | 2              | 3.8  | 2                | 0.9  |
| 5              | Jambi               | 5                    | 3.1  | 1              | 1.9  | 6                | 2.8  |
| 6              | Sumatera Selatan    | 5                    | 3.1  | 1              | 1.9  | 6                | 2.8  |
| 7              | Bangka Belitung     | 2                    | 1.2  | 1              | 1.9  | 3                | 1.4  |
| 8              | Bengkulu            | 3                    | 1.9  | 1              | 1.9  | 4                | 1.9  |
| 9              | Lampung             | 5                    | 3.1  | 1              | 1.9  | 6                | 2.8  |
| 10             | Banten              | 3                    | 1.9  | 2              | 3.8  | 5                | 2.3  |
| 11             | DKI. Jakarta        | 0                    | 0.0  | 1              | 1.9  | 1                | 0.5  |
| 12             | Jawa Barat          | 15                   | 9.3  | 5              | 9.4  | 20               | 9.3  |
| 13             | Jawa Tengah         | 15                   | 9.3  | 4              | 7.5  | 19               | 8.9  |
| 14             | D.I. Yogyakarta     | 2                    | 1.2  | 1              | 1.9  | 3                | 1.4  |
| 15             | Jawa Timur          | 17                   | 10.6 | 6              | 11.3 | 23               | 10.7 |
| 16             | Bali                | 8                    | 5.0  | 1              | 1.9  | 9                | 4.2  |
| 17             | Kalimantan Barat    | 5                    | 3.1  | 1              | 1.9  | 6                | 2.8  |
| 18             | Kalimantan Tengah   | 3                    | 1.9  | 1              | 1.9  | 4                | 1.9  |
| 19             | Kalimantan Selatan  | 6                    | 3.7  | 1              | 1.9  | 7                | 3.3  |
| 20             | Kalimantan Timur    | 6                    | 3.7  | 2              | 3.8  | 8                | 3.7  |
| 21             | Sulawesi Utara      | 2                    | 1.2  | 2              | 3.8  | 4                | 1.9  |
| 22             | Gorontalo           | 1                    | 0.6  | 1              | 1.9  | 2                | 0.9  |
| 23             | Sulawesi Tengah     | 5                    | 3.1  | 1              | 1.9  | 6                | 2.8  |
| 24             | Sulawesi Tenggara   | 2                    | 1.2  | 1              | 1.9  | 3                | 1.4  |
| 25             | Sulawesi Selatan    | 16                   | 9.9  | 2              | 3.8  | 18               | 8.4  |
| 26             | Nusa Tenggara Barat | 4                    | 2.5  | 1              | 1.9  | 5                | 2.3  |
| 27             | Nusa Tenggara Timur | 8                    | 5.0  | 1              | 1.9  | 9                | 4.2  |
| 28             | Irian Jaya Barat    | 3                    | 1.9  | 1              | 1.9  | 4                | 1.9  |
| 29             | Papua               | 2                    | 1.2  | 1              | 1.9  | 3                | 1.4  |
| Jumlah (Total) |                     | 161                  | 100  | 53             | 100  | 214              | 100  |

**1.2. Propinsi yang Tidak Terwakili**

|   |                      |
|---|----------------------|
| 1 | Nagro Aceh Darusalam |
| 2 | Maluku               |
| 3 | Maluku Utara         |

**1.3. Berdasarkan Basis Sektor Ekonomi**

| NO | PDRB PERKAPITA                                                           | KABUPATEN<br>(N=161) |      | KOTA<br>(N=53) |      | TOTAL<br>(N=214) |      |
|----|--------------------------------------------------------------------------|----------------------|------|----------------|------|------------------|------|
|    |                                                                          | Jumlah               | %    | Jumlah         | %    | Jumlah           | %    |
| 1  | Perdagangan dan Jasa                                                     | 97                   | 60.2 | 49             | 92.5 | 146              | 68.2 |
| 2  | Manufaktur                                                               | 31                   | 19.3 | 28             | 52.8 | 59               | 27.6 |
| 3  | Manufaktur Non Migas                                                     | 21                   | 13.0 | 23             | 43.4 | 44               | 20.6 |
| 4  | Pertambangan                                                             | 15                   | 9.3  | 1              | 1.9  | 16               | 7.5  |
| 5  | Perkebunan dan Kehutanan                                                 | 24                   | 14.9 | 0              | 0.0  | 24               | 11.2 |
| 6  | Pertanian Non Pangan<br>(Perkebunan, Kehutanan, Peternakan, & Perikanan) | 54                   | 33.5 | 1              | 1.9  | 55               | 25.7 |

Keterangan : Kontribusi PDRB Sektoral lebih dari 20%

#### 1.4. Berdasarkan PDRB Perkapita

| NO                          | PDRB PERKAPITA                      | KABUPATEN<br>(N=161) |               | KOTA<br>(N=53) |               | TOTAL<br>(N=214) |              |
|-----------------------------|-------------------------------------|----------------------|---------------|----------------|---------------|------------------|--------------|
|                             |                                     | Jumlah               | %             | Jumlah         | %             | Jumlah           | %            |
| 1                           | PDRB Perkapita < 2.5 Juta           | 16                   | 9.9           | 0              | 0.0           | 16               | 7.5          |
| 2                           | 2.5 Juta <= PDRB Perkapita < 5 Juta | 91                   | 56.5          | 7              | 13.2          | 98               | 45.8         |
| 3                           | 5 Juta <= PDRB Perkapita < 7.5 Juta | 32                   | 19.9          | 16             | 30.2          | 48               | 22.4         |
| 4                           | PDRB Perkapita => 7.5 Juta          | 22                   | 13.7          | 30             | 56.6          | 52               | 24.3         |
| <b>Jumlah Keseluruhan :</b> |                                     | <b>161</b>           | <b>100.00</b> | <b>53</b>      | <b>100.00</b> | <b>214</b>       | <b>100.0</b> |

**PERINGKAT DAERAH/Rank of Region :****Lampiran 2.1 : Peringkat 53 Kota Berdasarkan Kategori Umum/***Ranking of 53 Cities Based on the Overall Score*

| NO | PROPINSI  | KOTA           | 2003 | 2004 |
|----|-----------|----------------|------|------|
| 1  | Jatim     | Kediri         | AA   | AAA  |
| 2  | Jatim     | Malang         | C    | AAA  |
| 3  | Banten    | Cilegon        | A    | AA   |
| 4  | Sumbar    | Sawah Lunto    | A    | AA   |
| 5  | Gorontalo | Gorontalo      | BBB  | AA   |
| 6  | Kaltim    | Balikpapan     | BB   | AA   |
| 7  | Jatim     | Mojokerto      | BB   | AA   |
| 8  | DKI       | Jakarta        | C    | AA   |
| 9  | Jatim     | Madiun         | C    | AA   |
| 10 | Sumsel    | Palembang      | C    | AA   |
| 11 | Sulsel    | Pare-Pare      | C    | AA   |
| 12 | Jateng    | Tegal          | C    | AA   |
| 13 | Sulsel    | Makasar        |      | AA   |
| 14 | Riau      | Dumai          | C    | A    |
| 15 | Sumut     | Tanjung Balai  | C    | A    |
| 16 | Jatim     | Surabaya       | B    | BBB  |
| 17 | Sumut     | Tebing Tinggi  | C    | BBB  |
| 18 | Riau      | Batam          | AAA  | BB   |
| 19 | Jateng    | Semarang       | BB   | BB   |
| 20 | Sumbar    | Padang         | B    | BB   |
| 21 | Lampung   | Bandar Lampung | C    | BB   |
| 22 | NTT       | Kupang         | C    | BB   |
| 23 | Sumut     | Medan          | C    | BB   |
| 24 | Riau      | Pekan Baru     | C    | BB   |
| 25 | Jatim     | Probolinggo    | C    | BB   |
| 26 | Sumut     | Sibolga        | C    | BB   |
| 27 | Banten    | Tangerang      | C    | BB   |

| NO | PROPINSI | KOTA             | 2003 | 2004 |
|----|----------|------------------|------|------|
| 28 | DIY      | Yogyakarta       | C    | BB   |
| 29 | Kalbar   | Pontianak        |      | BB   |
| 30 | Jateng   | Surakarta        | C    | B    |
| 31 | Sumut    | Binjai           | D    | B    |
| 32 | Jabar    | Cirebon          | AA   | C    |
| 33 | Jabar    | Bandung          | BB   | C    |
| 34 | Sulut    | Bitung           | C    | C    |
| 35 | Jabar    | Bogor            | C    | C    |
| 36 | Bali     | Denpasar         | C    | C    |
| 37 | Sultra   | Kendari          | C    | C    |
| 38 | Sulut    | Manado           | C    | C    |
| 39 | Sumut    | Pematang Siantar | C    | C    |
| 40 | Kaltim   | Samarinda        | C    | C    |
| 41 | Jabar    | Bekasi           | D    | C    |
| 42 | NTB      | Mataram          | D    | C    |
| 43 | Babel    | Pangkal Pinang   | D    | C    |
| 44 | Jateng   | Pekalongan       | D    | C    |
| 45 | Jabar    | Sukabumi         | D    | C    |
| 46 | Kalsel   | Banjarmasin      |      | C    |
| 47 | Jambi    | Jambi            |      | C    |
| 48 | Papua    | Jayapura         |      | C    |
| 49 | Sulteng  | Palu             |      | C    |
| 50 | Papua    | Sorong           |      | C    |
| 51 | Riau     | Tanjung Pinang   |      | C    |
| 52 | Bengkulu | Bengkulu         | D    | D    |
| 53 | Kalteng  | Palangkaraya     |      | D    |

**Keterangan :**

|  |                                   |
|--|-----------------------------------|
|  | : Mengalami peningkatan peringkat |
|--|-----------------------------------|

|  |                                 |
|--|---------------------------------|
|  | : Mengalami penurunan peringkat |
|--|---------------------------------|

|  |                 |
|--|-----------------|
|  | : Tidak berubah |
|--|-----------------|



**Lampiran 2.2 : Peringkat 161 Kabupaten Berdasarkan Kategori Umum/  
Ranking of 161 Regencies Based on the Overall Score**

| NO | PROPINSI | KABUPATEN              | 2003 | 2004 |
|----|----------|------------------------|------|------|
| 1  | Jabar    | Purwakarta             | AAA  | AAA  |
| 2  | Kalteng  | Barito Utara           | AA   | AA   |
| 3  | Sulsel   | Gowa                   | AA   | AA   |
| 4  | Jabar    | Indramayu              | AA   | AA   |
| 5  | Sulsel   | Sinjai                 | AA   | AA   |
| 6  | Bali     | Gianyar                | A    | AA   |
| 7  | Sulsel   | Luwu Utara             | A    | AA   |
| 8  | Kalsel   | Tabalong               | A    | AA   |
| 9  | Bali     | Badung                 | BBB  | AA   |
| 10 | Sumut    | Asahan                 | B    | AA   |
| 11 | Jatim    | Gresik                 | C    | AA   |
| 12 | Jabar    | Karawang               | C    | AA   |
| 13 | Jateng   | Kudus                  | C    | AA   |
| 14 | Sumsel   | Musi Banyuasin         | C    | AA   |
| 15 | Sulsel   | Pinrang                | C    | AA   |
| 16 | Bali     | Klungkung              |      | AA   |
| 17 | Kaltim   | Bulungan               | AAA  | A    |
| 18 | Sulteng  | Banggai                | AA   | A    |
| 19 | Jabar    | Bekasi                 | A    | A    |
| 20 | Riau     | Pelalawan              | A    | A    |
| 21 | Jateng   | Cilacap                | C    | A    |
| 22 | Lampung  | Lampung Barat          | C    | A    |
| 23 | Sulsel   | Majene                 | C    | A    |
| 24 | Sulsel   | Jeneponto              | AA   | BBB  |
| 25 | Sultra   | Kolaka                 | BBB  | BBB  |
| 26 | Sulsel   | Barro                  | C    | BBB  |
| 27 | Sumbar   | Solok                  | C    | BBB  |
| 28 | Banten   | Tangerang              | C    | BBB  |
| 29 | Lampung  | Way Kanan              | C    | BBB  |
| 30 | Jabar    | Bandung                | D    | BBB  |
| 31 | Sumut    | Simalungun             | D    | BBB  |
| 32 | Jatim    | Magetan                | AAA  | BB   |
| 33 | NTT      | Ende                   | AA   | BB   |
| 34 | Kaltim   | Nunukan                | AA   | BB   |
| 35 | Sulsel   | Pangkajene & Kepulauan | AA   | BB   |
| 36 | Jabar    | Tasikmalaya            | AA   | BB   |
| 37 | NTT      | Belu                   | A    | BB   |
| 38 | Sulsel   | Bone                   | C    | BB   |
| 39 | Kalsel   | Hulu Sungai Selatan    | D    | BB   |
| 40 | Kalsel   | Hulu Sungai Tengah     | D    | BB   |
| 41 | Jatim    | Jombang                | D    | BB   |
| 42 | Sumut    | Langkat                | D    | BB   |
| 43 | Jabar    | Kuningan               | AA   | B    |
| 44 | Sulsel   | Bantaeng               | A    | B    |
| 45 | Jatim    | Blitar                 | C    | B    |
| 46 | Sulsel   | Selayar                | C    | B    |

| NO | PROPINSI | KABUPATEN            | 2003 | 2004 |
|----|----------|----------------------|------|------|
| 47 | Jatim    | Sidoarjo             | C    | B    |
| 48 | Jateng   | Magelang             | D    | B    |
| 49 | Jateng   | Pekalongan           | D    | B    |
| 50 | Banten   | Serang               | D    | B    |
| 51 | Bali     | Jembrana             | AAA  | C    |
| 52 | Bali     | Bangli               | AA   | C    |
| 53 | Jabar    | Cianjur              | AA   | C    |
| 54 | Sulsel   | Enrekang             | AA   | C    |
| 55 | Sulut    | Minahasa             | AA   | C    |
| 56 | Sulut    | Sangihe              | AA   | C    |
| 57 | Sumbar   | Sawahlunto Sijunjung | AA   | C    |
| 58 | Bali     | Tabanan              | AA   | C    |
| 59 | Jambi    | Tanjung Jabung Timur | AA   | C    |
| 60 | Babel    | Belitung             | A    | C    |
| 61 | Kalteng  | Kapuas               | A    | C    |
| 62 | Papua    | Manokwari            | A    | C    |
| 63 | Sulsel   | Tana Toraja          | A    | C    |
| 64 | Jambi    | Batanghari           | BB   | C    |
| 65 | Kalsel   | Hulu Sungai Utara    | BB   | C    |
| 66 | Sumut    | Labuhan Batu         | BB   | C    |
| 67 | Sumsel   | Lahat                | BB   | C    |
| 68 | Sulsel   | Maros                | BB   | C    |
| 69 | Sumbar   | Pesisir Selatan      | BB   | C    |
| 70 | Jateng   | Tegal                | BB   | C    |
| 71 | NTT      | Timor Tengah Selatan | BB   | C    |
| 72 | Babel    | Bangka               | C    | C    |
| 73 | Riau     | Bengkalis            | C    | C    |
| 74 | Kaltim   | Berau                | C    | C    |
| 75 | Bali     | Buleleng             | C    | C    |
| 76 | Jambi    | Bungo                | C    | C    |
| 77 | Jabar    | Ciamis               | C    | C    |
| 78 | Jabar    | Cirebon              | C    | C    |
| 79 | Sumut    | Dairi                | C    | C    |
| 80 | Jabar    | Garut                | C    | C    |
| 81 | Riau     | Kampar               | C    | C    |
| 82 | Bali     | Karang Asem          | C    | C    |
| 83 | Jatim    | Kediri               | C    | C    |
| 84 | Jambi    | Kerinci              | C    | C    |
| 85 | Riau     | Kuantan Senggigi     | C    | C    |
| 86 | Kaltim   | Kutai Kertanegara    | C    | C    |
| 87 | Kaltim   | Kutai Timur          | C    | C    |
| 88 | Banten   | Lebak                | C    | C    |
| 89 | Sumsel   | Muara Enim           | C    | C    |
| 90 | Kaltim   | Pasir                | C    | C    |
| 91 | Kalbar   | Sambas               | C    | C    |
| 92 | Kalbar   | Sanggau              | C    | C    |

| NO  | PROPINSI  | KABUPATEN          | 2003 | 2004 |
|-----|-----------|--------------------|------|------|
| 93  | Jabar     | Subang             | C    | C    |
| 94  | Sumut     | Tapanuli Utara     | C    | C    |
| 95  | Jambi     | Tebo               | C    | C    |
| 96  | NTT       | Timor Tengah Utara | C    | C    |
| 97  | Sulteng   | Toli Toli          | C    | C    |
| 98  | Kalteng   | Barito Selatan     | D    | C    |
| 99  | Jabar     | Bogor              | D    | C    |
| 100 | Sultra    | Buton              | D    | C    |
| 101 | Gorontalo | Gorontalo          | D    | C    |
| 102 | DIY       | Gunung Kidul       | D    | C    |
| 103 | Riau      | Indragiri Hilir    | D    | C    |
| 104 | Jateng    | Karang Anyar       | D    | C    |
| 105 | Jateng    | Kebumen            | D    | C    |
| 106 | Jateng    | Kendal             | D    | C    |
| 107 | Kalbar    | Ketapang           | D    | C    |
| 108 | Jateng    | Klaten             | D    | C    |
| 109 | Jatim     | Lamongan           | D    | C    |
| 110 | NTB       | Lombok Timur       | D    | C    |
| 111 | Sulsel    | Luwu               | D    | C    |
| 112 | Kalbar    | Pontianak          | D    | C    |
| 113 | Jabar     | Sukabumi           | D    | C    |
| 114 | Jabar     | Sumedang           | D    | C    |
| 115 | Sulsel    | Takalar            | D    | C    |
| 116 | Sumut     | Tanah Karo         | D    | C    |
| 117 | Kalsel    | Tapin              | D    | C    |
| 118 | Jatim     | Bangkalan          | E    | C    |
| 119 | DIY       | Bantul             | E    | C    |
| 120 | Jateng    | Banyumas           | E    | C    |
| 121 | Jatim     | Banyuwangi         | E    | C    |
| 122 | NTB       | Bima               | E    | C    |
| 123 | Jatim     | Bondowoso          | E    | C    |
| 124 | Jateng    | Jepara             | E    | C    |
| 125 | Lampung   | Lampung Timur      | E    | C    |
| 126 | NTB       | Lombok Barat       | E    | C    |
| 127 | Jatim     | Mojokerto          | E    | C    |

| NO  | PROPINSI | KABUPATEN          | 2003 | 2004 |
|-----|----------|--------------------|------|------|
| 128 | Jatim    | Pamekasan          | E    | C    |
| 129 | Jatim    | Pasuruan           | E    | C    |
| 130 | Jateng   | Pemalang           | E    | C    |
| 131 | Jatim    | Ponorogo           | E    | C    |
| 132 | Jateng   | Sukoharjo          | E    | C    |
| 133 | Kalsel   | Tanah Laut         | E    | C    |
| 134 | Jatim    | Tulungagung        | E    | C    |
| 135 | Bengkulu | Bengkulu Utara     |      | C    |
| 136 | Bengkulu | Rejang Lebong      |      | C    |
| 137 | Riau     | Rokan Hulu         | BB   | C    |
| 138 | Jateng   | Boyolali           | C    | D    |
| 139 | Sulteng  | Donggala           | C    | D    |
| 140 | Sumsel   | Musi Rawas         | C    | D    |
| 141 | Sumbar   | Pasaman            | C    | D    |
| 142 | NTB      | Dompus             | D    | D    |
| 143 | Papua    | Jayawijaya         | D    | D    |
| 144 | Lampung  | Lampung Utara      | D    | D    |
| 145 | Sulteng  | Morowali           | D    | D    |
| 146 | Sumsel   | Ogan Komering Ilir | D    | D    |
| 147 | Sulteng  | Poso               | D    | D    |
| 148 | NTT      | Sumba Barat        | D    | D    |
| 149 | Bengkulu | Bengkulu Selatan   | E    | D    |
| 150 | Sumut    | Deli Serdang       | E    | D    |
| 151 | NTT      | Flores Timur       | E    | D    |
| 152 | Jatim    | Jember             | E    | D    |
| 153 | Lampung  | Lampung Selatan    | E    | D    |
| 154 | NTT      | Ngada              | E    | D    |
| 155 | Jatim    | Situbondo          |      | D    |
| 156 | Jateng   | Wonosobo           |      | D    |
| 157 | Papua    | Sorong             | C    | E    |
| 158 | Kalbar   | Kapuas Hulu        | D    | E    |
| 159 | NTT      | Manggarai          | D    | E    |
| 160 | Papua    | Mimika             | D    | E    |
| 161 | Papua    | Fakfak             | E    | E    |

**Keterangan :**

 : Mengalami peningkatan peringkat

 : Mengalami penurunan peringkat

 : Tidak berubah

**Lampiran 3.1 : Peringkat 53 Kota Berdasarkan Faktor Kelembagaan/  
Ranking of 53 Cities Based on the Institutional Score**

| NO | PROPINSI  | KOTA             | 2003 | 2004 |
|----|-----------|------------------|------|------|
| 1  | Banten    | Cilegon          | C    | AA   |
| 2  | Gorontalo | Gorontalo        | C    | AA   |
| 3  | Jatim     | Kediri           | C    | AA   |
| 4  | Jatim     | Mojokerto        | A    | A    |
| 5  | Riau      | Dumai            | C    | A    |
| 6  | Sulsel    | Pare-Pare        | C    | A    |
| 7  | Sumbar    | Sawah Lunto      | C    | A    |
| 8  | Jatim     | Madiun           | D    | BBB  |
| 9  | Jateng    | Tegal            | BB   | BB   |
| 10 | Jatim     | Malang           | C    | BB   |
| 11 | NTT       | Kupang           | C    | BB   |
| 12 | Kaltim    | Balikpapan       | D    | BB   |
| 13 | Sulsel    | Makasar          |      | BB   |
| 14 | Sumut     | Tebing Tinggi    | BB   | C    |
| 15 | Lampung   | Bandar Lampung   | C    | C    |
| 16 | Jabar     | Bogor            | C    | C    |
| 17 | Bali      | Denpasar         | C    | C    |
| 18 | DKI       | Jakarta          | C    | C    |
| 19 | Sumbar    | Padang           | C    | C    |
| 20 | Riau      | Pekan Baru       | C    | C    |
| 21 | Sumut     | Pematang Siantar | C    | C    |
| 22 | Jateng    | Semarang         | C    | C    |
| 23 | DIY       | Yogyakarta       | C    | C    |
| 24 | Sumut     | Binjai           | D    | C    |
| 25 | Sultra    | Kendari          | D    | C    |
| 26 | Jateng    | Pekalongan       | D    | C    |
| 27 | Jatim     | Probolinggo      | D    | C    |

| NO | PROPINSI | KOTA           | 2003 | 2004 |
|----|----------|----------------|------|------|
| 28 | Jatim    | Surabaya       | D    | C    |
| 29 | Jateng   | Surakarta      | D    | C    |
| 30 | Sumut    | Tanjung Balai  | D    | C    |
| 31 | Jabar    | Bekasi         | E    | C    |
| 32 | Kalsel   | Banjarmasin    |      | C    |
| 33 | Jambi    | Jambi          |      | C    |
| 34 | Sulteng  | Palu           |      | C    |
| 35 | Kalbar   | Pontianak      |      | C    |
| 36 | Papua    | Sorong         |      | C    |
| 37 | Jabar    | Bandung        | BB   | D    |
| 38 | Riau     | Batam          | C    | D    |
| 39 | Bengkulu | Bengkulu       | C    | D    |
| 40 | Jabar    | Cirebon        | C    | D    |
| 41 | Sumut    | Medan          | C    | D    |
| 42 | Sumsel   | Palembang      | D    | D    |
| 43 | Kaltim   | Samarinda      | D    | D    |
| 44 | Sumut    | Sibolga        | D    | D    |
| 45 | Jabar    | Sukabumi       | D    | D    |
| 46 | Banten   | Tangerang      | D    | D    |
| 47 | Sulut    | Bitung         | E    | D    |
| 48 | NTB      | Mataram        | E    | D    |
| 49 | Babel    | Pangkal Pinang | E    | D    |
| 50 | Papua    | Jayapura       |      | D    |
| 51 | Kalteng  | Palangkaraya   |      | D    |
| 52 | Sulut    | Manado         | C    | E    |
| 53 | Riau     | Tanjung Pinang |      | E    |

**Keterangan :**

 : Mengalami peningkatan peringkat

 : Mengalami penurunan peringkat

 : Tidak berubah

**Lampiran 3.2 : Peringkat 161 Kabupaten Berdasarkan Faktor Kelembagaan/  
Ranking of 161 Regencies Based on the Institutional Score**

| NO | PROPINSI | KABUPATEN            | 2003 | 2004 |
|----|----------|----------------------|------|------|
| 1  | Riau     | Pelalawan            | AAA  | AA   |
| 2  | Sulteng  | Banggai              | AA   | AA   |
| 3  | Kalteng  | Barito Utara         | AA   | AA   |
| 4  | Jabar    | Purwakarta           | AA   | AA   |
| 5  | Sulsel   | Sinjai               | AA   | AA   |
| 6  | NTT      | Belu                 | A    | AA   |
| 7  | Sumsel   | Musi Banyuasin       | BBB  | AA   |
| 8  | Lampung  | Lampung Barat        | BB   | AA   |
| 9  | Lampung  | Way Kanan            | BB   | AA   |
| 10 | Sumut    | Asahan               | C    | AA   |
| 11 | Sulsel   | Gowa                 | C    | AA   |
| 12 | Jabar    | Indramayu            | C    | AA   |
| 13 | Sulsel   | Luwu Utara           | C    | AA   |
| 14 | Sulsel   | Pinrang              | C    | AA   |
| 15 | NTT      | Ende                 | AA   | A    |
| 16 | Kalsel   | Tabalong             | AA   | A    |
| 17 | Jabar    | Tasikmalaya          | AA   | A    |
| 18 | NTT      | Timor Tengah Utara   | AA   | A    |
| 19 | Sulteng  | Toli Toli            | AA   | A    |
| 20 | Bali     | Gianyar              | A    | A    |
| 21 | Jambi    | Bungo                | C    | A    |
| 22 | Sultra   | Kolaka               | C    | A    |
| 23 | Sumbar   | Solok                | C    | A    |
| 24 | Sulsel   | Jeneponto            | AAA  | BB   |
| 25 | Kaltim   | Bulungan             | AA   | BB   |
| 26 | Jabar    | Kuningan             | AA   | BB   |
| 27 | Kaltim   | Nunukan              | AA   | BB   |
| 28 | Jambi    | Tanjung Jabung Timur | AA   | BB   |
| 29 | Bali     | Karang Asem          | BB   | BB   |
| 30 | Sulsel   | Barru                | B    | BB   |
| 31 | NTB      | Bima                 | C    | BB   |
| 32 | Jateng   | Cilacap              | C    | BB   |
| 33 | Jatim    | Jombang              | C    | BB   |
| 34 | Riau     | Kampar               | C    | BB   |
| 35 | Jambi    | Kerinci              | C    | BB   |
| 36 | Sulsel   | Luwu                 | C    | BB   |
| 37 | Sulsel   | Selayar              | C    | BB   |
| 38 | Jabar    | Bekasi               | D    | BB   |
| 39 | Jabar    | Bogor                | D    | BB   |
| 40 | Sulsel   | Bone                 | D    | BB   |
| 41 | Kalsel   | Hulu Sungai Selatan  | D    | BB   |
| 42 | Jabar    | Karawang             | D    | BB   |
| 43 | Jateng   | Kudus                | D    | BB   |
| 44 | NTB      | Lombok Barat         | D    | BB   |
| 45 | Jateng   | Magelang             | D    | BB   |
| 46 | Sulsel   | Majene               | D    | BB   |

| NO | PROPINSI | KABUPATEN              | 2003 | 2004 |
|----|----------|------------------------|------|------|
| 47 | Jateng   | Pekalongan             | D    | BB   |
| 48 | Jabar    | Sumedang               | D    | BB   |
| 49 | Sumut    | Tapanuli Utara         | D    | BB   |
| 50 | Bali     | Klungkung              |      | BB   |
| 51 | Bengkulu | Rejang Lebong          |      | BB   |
| 52 | Jambi    | Batanghari             | A    | B    |
| 53 | Bali     | Badung                 | BB   | B    |
| 54 | Sumut    | Dairi                  | B    | B    |
| 55 | Sulsel   | Bantaeng               | C    | B    |
| 56 | Jabar    | Cianjur                | AAA  | C    |
| 57 | Sulsel   | Enrekang               | AAA  | C    |
| 58 | Bali     | Jembrana               | AAA  | C    |
| 59 | Sumbar   | Sawahlunto Sijunjung   | AAA  | C    |
| 60 | Bali     | Bangli                 | AA   | C    |
| 61 | Babel    | Belitung               | AA   | C    |
| 62 | Kalsel   | Hulu Sungai Utara      | AA   | C    |
| 63 | Jatim    | Magetan                | AA   | C    |
| 64 | Bali     | Tabanan                | AA   | C    |
| 65 | Sulsel   | Tana Toraja            | AA   | C    |
| 66 | NTT      | Timor Tengah Selatan   | AA   | C    |
| 67 | Jatim    | Blitar                 | A    | C    |
| 68 | Papua    | Manokwari              | A    | C    |
| 69 | Sulsel   | Pangkajene & Kepulauan | A    | C    |
| 70 | Riau     | Rokan Hulu             | A    | C    |
| 71 | Jambi    | Tebo                   | A    | C    |
| 72 | Sumut    | Labuhan Batu           | BBB  | C    |
| 73 | Banten   | Lebak                  | BBB  | C    |
| 74 | Sulut    | Sangihe                | BBB  | C    |
| 75 | Kalteng  | Kapuas                 | BB   | C    |
| 76 | Kaltim   | Pasir                  | BB   | C    |
| 77 | Jabar    | Bandung                | C    | C    |
| 78 | Jatim    | Bangkalan              | C    | C    |
| 79 | Kalteng  | Barito Selatan         | C    | C    |
| 80 | Riau     | Bengkalis              | C    | C    |
| 81 | Jateng   | Boyolali               | C    | C    |
| 82 | Bali     | Buleleng               | C    | C    |
| 83 | Sultra   | Buton                  | C    | C    |
| 84 | Jabar    | Cirebon                | C    | C    |
| 85 | Sulteng  | Donggala               | C    | C    |
| 86 | Jabar    | Garut                  | C    | C    |
| 87 | DIY      | Gunung Kidul           | C    | C    |
| 88 | Jateng   | Karang Anyar           | C    | C    |
| 89 | Jateng   | Kebumen                | C    | C    |
| 90 | Jatim    | Kediri                 | C    | C    |
| 91 | Kaltim   | Kutai Kertanegara      | C    | C    |
| 92 | Kaltim   | Kutai Timur            | C    | C    |

| NO  | PROPINSI  | KABUPATEN          | 2003 | 2004 |
|-----|-----------|--------------------|------|------|
| 93  | Sumsel    | Lahat              | C    | C    |
| 94  | Jatim     | Lamongan           | C    | C    |
| 95  | NTB       | Lombok Timur       | C    | C    |
| 96  | NTT       | Manggarai          | C    | C    |
| 97  | Sumsel    | Muara Enim         | C    | C    |
| 98  | Sumbar    | Pesisir Selatan    | C    | C    |
| 99  | Kalbar    | Sambas             | C    | C    |
| 100 | Banten    | Serang             | C    | C    |
| 101 | Jatim     | Sidoarjo           | C    | C    |
| 102 | NTT       | Sumba Barat        | C    | C    |
| 103 | Jateng    | Tegal              | C    | C    |
| 104 | DIY       | Bantul             | D    | C    |
| 105 | Jateng    | Banyumas           | D    | C    |
| 106 | Jatim     | Banyuwangi         | D    | C    |
| 107 | Jatim     | Gresik             | D    | C    |
| 108 | Kalsel    | Hulu Sungai Tengah | D    | C    |
| 109 | Papua     | Jayawijaya         | D    | C    |
| 110 | Jateng    | Jepara             | D    | C    |
| 111 | Jateng    | Kendal             | D    | C    |
| 112 | Kalbar    | Ketapang           | D    | C    |
| 113 | Riau      | Kuantan Senggigi   | D    | C    |
| 114 | Lampung   | Lampung Utara      | D    | C    |
| 115 | Sumut     | Langkat            | D    | C    |
| 116 | Jatim     | Pasuruan           | D    | C    |
| 117 | Jateng    | Pemalang           | D    | C    |
| 118 | Sulteng   | Poso               | D    | C    |
| 119 | Sumut     | Simalungun         | D    | C    |
| 120 | Jabar     | Sukabumi           | D    | C    |
| 121 | Sulsel    | Takalar            | D    | C    |
| 122 | Kalsel    | Tanah Laut         | D    | C    |
| 123 | Kalsel    | Tapin              | D    | C    |
| 124 | Jatim     | Bondowoso          | E    | C    |
| 125 | Sumut     | Deli Serdang       | E    | C    |
| 126 | NTT       | Flores Timur       | E    | C    |
| 127 | Gorontalo | Gorontalo          | E    | C    |

| NO  | PROPINSI | KABUPATEN          | 2003 | 2004 |
|-----|----------|--------------------|------|------|
| 128 | Lampung  | Lampung Timur      | E    | C    |
| 129 | Jatim    | Mojokerto          | E    | C    |
| 130 | Jatim    | Pamekasan          | E    | C    |
| 131 | Jatim    | Ponorogo           | E    | C    |
| 132 | Kalbar   | Sanggau            | E    | C    |
| 133 | Jabar    | Subang             | E    | C    |
| 134 | Jateng   | Sukoharjo          | E    | C    |
| 135 | Jatim    | Tulungagung        | E    | C    |
| 136 | Bengkulu | Bengkulu Utara     |      | C    |
| 137 | Jateng   | Wonosobo           |      | C    |
| 138 | Sumbar   | Pasaman            | BB   | D    |
| 139 | Babel    | Bangka             | C    | D    |
| 140 | NTB      | Dompu              | C    | D    |
| 141 | Riau     | Indragiri Hilir    | C    | D    |
| 142 | Jateng   | Klaten             | C    | D    |
| 143 | Sulsel   | Maros              | C    | D    |
| 144 | Banten   | Tangerang          | C    | D    |
| 145 | Kaltim   | Berau              | D    | D    |
| 146 | Papua    | Fakfak             | D    | D    |
| 147 | Papua    | Mimika             | D    | D    |
| 148 | Sulteng  | Morowali           | D    | D    |
| 149 | NTT      | Ngada              | D    | D    |
| 150 | Sumsel   | Ogan Komering Ilir | D    | D    |
| 151 | Jatim    | Jember             | E    | D    |
| 152 | Kalbar   | Pontianak          | E    | D    |
| 153 | Sumut    | Tanah Karo         | E    | D    |
| 154 | Jatim    | Situbondo          |      | D    |
| 155 | Bengkulu | Bengkulu Selatan   | C    | E    |
| 156 | Jabar    | Ciamis             | C    | E    |
| 157 | Sulut    | Minahasa           | C    | E    |
| 158 | Sumsel   | Musi Rawas         | C    | E    |
| 159 | Papua    | Sorong             | C    | E    |
| 160 | Kalbar   | Kapuas Hulu        | E    | E    |
| 161 | Lampung  | Lampung Selatan    | E    | E    |

**Keterangan :**

 : Mengalami peningkatan peringkat

 : Mengalami penurunan peringkat

 : Tidak berubah

**Lampiran 4.1 : Peringkat 53 Kota Berdasarkan Faktor Sosial Politik/  
Ranking of 53 Cities Based on the Socio-Political Score**

| NO | PROPINSI  | KOTA           | 2003 | 2004 |
|----|-----------|----------------|------|------|
| 1  | Jatim     | Mojokerto      | C    | AA   |
| 2  | Sulsel    | Pare-Pare      | C    | AA   |
| 3  | Jateng    | Tegal          | C    | A    |
| 4  | Gorontalo | Gorontalo      | AA   | BBB  |
| 5  | Sumbar    | Sawah Lunto    | AA   | BBB  |
| 6  | Banten    | Cilegon        | D    | BBB  |
| 7  | Sumut     | Tebing Tinggi  | D    | BBB  |
| 8  | Sulut     | Manado         | B    | BB   |
| 9  | Kaltim    | Balikpapan     | C    | BB   |
| 10 | Jatim     | Kediri         | C    | BB   |
| 11 | Jatim     | Madiun         | C    | BB   |
| 12 | Sumut     | Tanjung Balai  | C    | BB   |
| 13 | Jatim     | Malang         | D    | BB   |
| 14 | Sumut     | Medan          | D    | BB   |
| 15 | Babel     | Pangkal Pinang | D    | BB   |
| 16 | Jambi     | Jambi          |      | BB   |
| 17 | Riau      | Tanjung Pinang |      | BB   |
| 18 | NTB       | Mataram        | C    | B    |
| 19 | Jateng    | Pekalongan     | D    | B    |
| 20 | Riau      | Batam          | BB   | C    |
| 21 | Lampung   | Bandar Lampung | C    | C    |
| 22 | Jabar     | Bandung        | C    | C    |
| 23 | Sulut     | Bitung         | C    | C    |
| 24 | Jabar     | Bogor          | C    | C    |
| 25 | Jabar     | Cirebon        | C    | C    |
| 26 | Bali      | Denpasar       | C    | C    |
| 27 | Riau      | Dumai          | C    | C    |

| NO | PROPINSI | KOTA             | 2003 | 2004 |
|----|----------|------------------|------|------|
| 28 | Sultra   | Kendari          | C    | C    |
| 29 | NTT      | Kupang           | C    | C    |
| 30 | Sumbar   | Padang           | C    | C    |
| 31 | Kaltim   | Samarinda        | C    | C    |
| 32 | Sumut    | Sibolga          | C    | C    |
| 33 | Jabar    | Sukabumi         | C    | C    |
| 34 | Jatim    | Surabaya         | C    | C    |
| 35 | Sumut    | Binjai           | D    | C    |
| 36 | DKI      | Jakarta          | D    | C    |
| 37 | Sumsel   | Palembang        | D    | C    |
| 38 | Riau     | Pekan Baru       | D    | C    |
| 39 | Sumut    | Pematang Siantar | D    | C    |
| 40 | Jatim    | Probolinggo      | D    | C    |
| 41 | Jateng   | Semarang         | D    | C    |
| 42 | Jateng   | Surakarta        | D    | C    |
| 43 | DIY      | Yogyakarta       | D    | C    |
| 44 | Jabar    | Bekasi           | E    | C    |
| 45 | Kalsel   | Banjarmasin      |      | C    |
| 46 | Papua    | Jayapura         |      | C    |
| 47 | Sulsel   | Makasar          |      | C    |
| 48 | Kalteng  | Palangkaraya     |      | C    |
| 49 | Kalbar   | Pontianak        |      | C    |
| 50 | Bengkulu | Bengkulu         | D    | D    |
| 51 | Banten   | Tangerang        | D    | D    |
| 52 | Sulteng  | Palu             |      | D    |
| 53 | Papua    | Sorong           |      | D    |

**Keterangan :**

 : Mengalami peningkatan peringkat

 : Mengalami penurunan peringkat

 : Tidak berubah

**Lampiran 4.2 : Peringkat 161 Kabupaten Berdasarkan Faktor Sosial Politik/  
Ranking of 161 Regencies Based on the Socio-Political Score**

| NO | PROPINSI  | KABUPATEN              | 2003 | 2004 |
|----|-----------|------------------------|------|------|
| 1  | Jatim     | Magetan                | AAA  | AA   |
| 2  | Bali      | Bangli                 | AA   | AA   |
| 3  | Sulsel    | Sinjai                 | AA   | AA   |
| 4  | Jabar     | Ciamis                 | A    | AA   |
| 5  | Sulsel    | Majene                 | BBB  | AA   |
| 6  | Bali      | Gianyar                | C    | AA   |
| 7  | Jateng    | Sukoharjo              | C    | AA   |
| 8  | Kalsel    | Tapin                  | C    | AA   |
| 9  | Jambi     | Tebo                   | C    | AA   |
| 10 | Sulteng   | Banggai                | AA   | A    |
| 11 | Sulsel    | Enrekang               | AA   | A    |
| 12 | Sulsel    | Jeneponto              | AA   | A    |
| 13 | Sulut     | Sangihe                | AA   | A    |
| 14 | Jabar     | Indramayu              | A    | A    |
| 15 | Sulsel    | Selayar                | BBB  | A    |
| 16 | Lampung   | Lampung Barat          | BB   | A    |
| 17 | Sulsel    | Bone                   | C    | A    |
| 18 | Sultra    | Buton                  | C    | A    |
| 19 | NTB       | Lombok Timur           | C    | A    |
| 20 | Bali      | Klungkung              |      | A    |
| 21 | Kalteng   | Barito Utara           | A    | BBB  |
| 22 | Sumsel    | Lahat                  | BB   | BBB  |
| 23 | Lampung   | Way Kanan              | C    | BBB  |
| 24 | Sulsel    | Barru                  | D    | BBB  |
| 25 | NTB       | Bima                   | D    | BBB  |
| 26 | DIY       | Gunung Kidul           | D    | BBB  |
| 27 | NTT       | Belu                   | AAA  | BB   |
| 28 | Jabar     | Kuningan               | AAA  | BB   |
| 29 | Kaltim    | Bulungan               | AA   | BB   |
| 30 | Sulsel    | Gowa                   | AA   | BB   |
| 31 | Bali      | Jembrana               | AA   | BB   |
| 32 | Sulsel    | Luwu Utara             | AA   | BB   |
| 33 | Kaltim    | Nunukan                | AA   | BB   |
| 34 | Jabar     | Subang                 | AA   | BB   |
| 35 | Sumut     | Tapanuli Utara         | AA   | BB   |
| 36 | NTT       | Timor Tengah Selatan   | A    | BB   |
| 37 | Sultra    | Kolaka                 | BB   | BB   |
| 38 | Gorontalo | Gorontalo              | B    | BB   |
| 39 | Bali      | Karang Asem            | B    | BB   |
| 40 | Sulsel    | Pangkajene & Kepulauan | B    | BB   |
| 41 | Bali      | Badung                 | C    | BB   |
| 42 | Bali      | Buleleng               | C    | BB   |
| 43 | Jambi     | Bungo                  | C    | BB   |
| 44 | Kalsel    | Hulu Sungai Selatan    | C    | BB   |
| 45 | Kalsel    | Hulu Sungai Tengah     | C    | BB   |
| 46 | Jabar     | Karawang               | C    | BB   |

| NO | PROPINSI | KABUPATEN            | 2003 | 2004 |
|----|----------|----------------------|------|------|
| 47 | Jateng   | Magelang             | C    | BB   |
| 48 | Sulsel   | Pinrang              | C    | BB   |
| 49 | Jabar    | Sumedang             | C    | BB   |
| 50 | Kalsel   | Tabalong             | C    | BB   |
| 51 | Jambi    | Tanjung Jabung Timur | C    | BB   |
| 52 | Babel    | Bangka               | D    | BB   |
| 53 | Jabar    | Cirebon              | D    | BB   |
| 54 | Jatim    | Gresik               | D    | BB   |
| 55 | Jateng   | Kudus                | D    | BB   |
| 56 | Jatim    | Lamongan             | D    | BB   |
| 57 | Sumsel   | Musi Banyuasin       | D    | BB   |
| 58 | NTT      | Timor Tengah Utara   | D    | BB   |
| 59 | Bengkulu | Bengkulu Utara       |      | BB   |
| 60 | NTT      | Ende                 | AAA  | B    |
| 61 | Sumbar   | Pesisir Selatan      | AA   | B    |
| 62 | Jambi    | Batanghari           | BB   | B    |
| 63 | Babel    | Belitung             | BB   | B    |
| 64 | Jatim    | Blitar               | C    | B    |
| 65 | Sulsel   | Maros                | C    | B    |
| 66 | Sumsel   | Musi Rawas           | C    | B    |
| 67 | Kalbar   | Sambas               | C    | B    |
| 68 | Sulsel   | Bantaeng             | AAA  | C    |
| 69 | Jabar    | Purwakarta           | AAA  | C    |
| 70 | Jabar    | Tasikmalaya          | AAA  | C    |
| 71 | Riau     | Kampar               | AA   | C    |
| 72 | Kalteng  | Kapuas               | AA   | C    |
| 73 | Papua    | Manokwari            | AA   | C    |
| 74 | Sulut    | Minahasa             | AA   | C    |
| 75 | Sulsel   | Tana Toraja          | AA   | C    |
| 76 | Jateng   | Tegal                | AA   | C    |
| 77 | Sumbar   | Sawahlunto Sijunjung | A    | C    |
| 78 | Jabar    | Cianjur              | BB   | C    |
| 79 | Jabar    | Garut                | BB   | C    |
| 80 | Jatim    | Kediri               | BB   | C    |
| 81 | Sumut    | Asahan               | C    | C    |
| 82 | Kalteng  | Barito Selatan       | C    | C    |
| 83 | Riau     | Bengkalis            | C    | C    |
| 84 | Jatim    | Bondowoso            | C    | C    |
| 85 | Jateng   | Boyolali             | C    | C    |
| 86 | Sumut    | Dairi                | C    | C    |
| 87 | Sulteng  | Donggala             | C    | C    |
| 88 | Kalsel   | Hulu Sungai Utara    | C    | C    |
| 89 | Riau     | Indragiri Hilir      | C    | C    |
| 90 | Papua    | Jayawijaya           | C    | C    |
| 91 | Jatim    | Jombang              | C    | C    |
| 92 | Jateng   | Karang Anyar         | C    | C    |

| NO  | PROPINSI | KABUPATEN        | 2003 | 2004 |
|-----|----------|------------------|------|------|
| 93  | Jateng   | Kebumen          | C    | C    |
| 94  | Jateng   | Kendal           | C    | C    |
| 95  | Jambi    | Kerinci          | C    | C    |
| 96  | Kalbar   | Ketapang         | C    | C    |
| 97  | Jateng   | Klaten           | C    | C    |
| 98  | Riau     | Kuantan Senggigi | C    | C    |
| 99  | Kaltim   | Kutai Timur      | C    | C    |
| 100 | Lampung  | Lampung Utara    | C    | C    |
| 101 | Sumut    | Langkat          | C    | C    |
| 102 | Banten   | Lebak            | C    | C    |
| 103 | Sulsel   | Luwu             | C    | C    |
| 104 | NTT      | Manggarai        | C    | C    |
| 105 | Papua    | Mimika           | C    | C    |
| 106 | NTT      | Ngada            | C    | C    |
| 107 | Sumbar   | Pasaman          | C    | C    |
| 108 | Kaltim   | Pasir            | C    | C    |
| 109 | Riau     | Pelalawan        | C    | C    |
| 110 | Riau     | Rokan Hulu       | C    | C    |
| 111 | Kalbar   | Sanggau          | C    | C    |
| 112 | Sumut    | Simalungun       | C    | C    |
| 113 | Sumbar   | Solok            | C    | C    |
| 114 | Jabar    | Sukabumi         | C    | C    |
| 115 | NTT      | Sumba Barat      | C    | C    |
| 116 | Bali     | Tabanan          | C    | C    |
| 117 | Sulsel   | Takalar          | C    | C    |
| 118 | Sulteng  | Toli Toli        | C    | C    |
| 119 | Jatim    | Tulungagung      | C    | C    |
| 120 | Jatim    | Bangkalan        | D    | C    |
| 121 | Jatim    | Banyuwangi       | D    | C    |
| 122 | Jabar    | Bekasi           | D    | C    |
| 123 | Bengkulu | Bengkulu Selatan | D    | C    |
| 124 | Jabar    | Bogor            | D    | C    |
| 125 | Jateng   | Cilacap          | D    | C    |
| 126 | NTB      | Dompu            | D    | C    |
| 127 | Jatim    | Jember           | D    | C    |

| NO  | PROPINSI | KABUPATEN          | 2003 | 2004 |
|-----|----------|--------------------|------|------|
| 128 | Jateng   | Jepara             | D    | C    |
| 129 | Lampung  | Lampung Selatan    | D    | C    |
| 130 | NTB      | Lombok Barat       | D    | C    |
| 131 | Sumsel   | Muara Enim         | D    | C    |
| 132 | Sumsel   | Ogan Komering Ilir | D    | C    |
| 133 | Jatim    | Pamekasan          | D    | C    |
| 134 | Jateng   | Pekalongan         | D    | C    |
| 135 | Jateng   | Pemalang           | D    | C    |
| 136 | Jatim    | Ponorogo           | D    | C    |
| 137 | Kalbar   | Pontianak          | D    | C    |
| 138 | Banten   | Serang             | D    | C    |
| 139 | Jatim    | Sidoarjo           | D    | C    |
| 140 | Banten   | Tangerang          | D    | C    |
| 141 | Jabar    | Bandung            | E    | C    |
| 142 | DIY      | Bantul             | E    | C    |
| 143 | Jateng   | Banyumas           | E    | C    |
| 144 | Sumut    | Deli Serdang       | E    | C    |
| 145 | NTT      | Flores Timur       | E    | C    |
| 146 | Sumut    | Labuhan Batu       | E    | C    |
| 147 | Lampung  | Lampung Timur      | E    | C    |
| 148 | Jatim    | Mojokerto          | E    | C    |
| 149 | Jatim    | Pasuruan           | E    | C    |
| 150 | Kalsel   | Tanah Laut         | E    | C    |
| 151 | Bengkulu | Rejang Lebong      |      | C    |
| 152 | Jatim    | Situbondo          |      | C    |
| 153 | Jateng   | Wonosobo           |      | C    |
| 154 | Papua    | Sorong             | BB   | D    |
| 155 | Papua    | Fakfak             | C    | D    |
| 156 | Kalbar   | Kapuas Hulu        | C    | D    |
| 157 | Kaltim   | Berau              | D    | D    |
| 158 | Kaltim   | Kutai Kertanegara  | D    | D    |
| 159 | Sulteng  | Morowali           | D    | D    |
| 160 | Sumut    | Tanah Karo         | D    | D    |
| 161 | Sulteng  | Poso               | D    | E    |

**Keterangan :**

 : Mengalami peningkatan peringkat

 : Mengalami penurunan peringkat

 : Tidak berubah



**Lampiran 5.1 : Peringkat 53 Kota Berdasarkan Faktor Ekonomi Daerah/  
Ranking of 53 Cities Based on the Economic Dynamism Score**

| NO | PROPINSI | KOTA             | 2003 | 2004 |
|----|----------|------------------|------|------|
| 1  | Kaltim   | Balikpapan       | AAA  | AAA  |
| 2  | Riau     | Batam            | AAA  | AAA  |
| 3  | Sumsel   | Palembang        | AA   | AAA  |
| 4  | Riau     | Pekan Baru       | AA   | AAA  |
| 5  | Kaltim   | Samarinda        | AA   | AAA  |
| 6  | Sumut    | Sibolga          | A    | AAA  |
| 7  | Jabar    | Bandung          | BB   | AAA  |
| 8  | Sulsel   | Makasar          |      | AAA  |
| 9  | Sulut    | Bitung           | AAA  | AA   |
| 10 | Jabar    | Cirebon          | AAA  | AA   |
| 11 | Sumut    | Pematang Siantar | AA   | AA   |
| 12 | Jatim    | Malang           | A    | AA   |
| 13 | DKI      | Jakarta          | BBB  | AA   |
| 14 | Sumut    | Binjai           | C    | AA   |
| 15 | Jateng   | Surakarta        | C    | AA   |
| 16 | Sumut    | Tanjung Balai    | C    | AA   |
| 17 | NTT      | Kupang           | D    | AA   |
| 18 | Riau     | Tanjung Pinang   |      | AA   |
| 19 | Banten   | Cilegon          | AAA  | A    |
| 20 | Jatim    | Kediri           | AAA  | A    |
| 21 | Jateng   | Semarang         | AA   | A    |
| 22 | Bali     | Denpasar         | A    | A    |
| 23 | Sumbar   | Padang           | A    | A    |
| 24 | Jatim    | Surabaya         | A    | A    |
| 25 | Banten   | Tangerang        | A    | A    |
| 26 | Lampung  | Bandar Lampung   | BBB  | A    |
| 27 | DIY      | Yogyakarta       | BB   | A    |

| NO | PROPINSI  | KOTA           | 2003 | 2004 |
|----|-----------|----------------|------|------|
| 28 | Jabar     | Bogor          | C    | A    |
| 29 | Riau      | Dumai          | C    | BBB  |
| 30 | Sumut     | Tebing Tinggi  | C    | BBB  |
| 31 | Sultra    | Kendari        | AA   | BB   |
| 32 | Sumbar    | Sawah Lunto    | BB   | BB   |
| 33 | Sulut     | Manado         | C    | BB   |
| 34 | Sumut     | Medan          | C    | BB   |
| 35 | Jatim     | Mojokerto      | C    | BB   |
| 36 | Babel     | Pangkal Pinang | C    | BB   |
| 37 | Sulsel    | Pare-Pare      | C    | BB   |
| 38 | Sulteng   | Palu           |      | BB   |
| 39 | Kalbar    | Pontianak      |      | BB   |
| 40 | Papua     | Sorong         |      | BB   |
| 41 | Papua     | Jayapura       |      | B    |
| 42 | Jabar     | Bekasi         | C    | C    |
| 43 | Bengkulu  | Bengkulu       | C    | C    |
| 44 | Gorontalo | Gorontalo      | C    | C    |
| 45 | Jatim     | Madiun         | C    | C    |
| 46 | Jatim     | Probolinggo    | C    | C    |
| 47 | Jateng    | Tegal          | C    | C    |
| 48 | Jateng    | Pekalongan     | D    | C    |
| 49 | Jabar     | Sukabumi       | D    | C    |
| 50 | Jambi     | Jambi          |      | C    |
| 51 | Kalteng   | Palangkaraya   |      | C    |
| 52 | NTB       | Mataram        | C    | D    |
| 53 | Kalsel    | Banjarmasin    |      | D    |

**Keterangan :**

 : Mengalami peningkatan peringkat

 : Mengalami penurunan peringkat

 : Tidak berubah

**Lampiran 5.2 : Peringkat 161 Kabupaten Berdasarkan Faktor Ekonomi Daerah/  
Ranking of 161 Regencies Based on the Economic Dynamism Score**

| NO | PROPINSI | KABUPATEN              | 2003 | 2004 |
|----|----------|------------------------|------|------|
| 1  | Sumut    | Asahan                 | AAA  | AAA  |
| 2  | Sumut    | Labuhan Batu           | AAA  | AA   |
| 3  | Sumut    | Dairi                  | BB   | AA   |
| 4  | Sumut    | Langkat                | C    | AA   |
| 5  | Jabar    | Bekasi                 | AA   | AA   |
| 6  | Kaltim   | Berau                  | AA   | AA   |
| 7  | Jateng   | Cilacap                | AA   | AA   |
| 8  | Kaltim   | Kutai Timur            | AA   | AA   |
| 9  | Jabar    | Purwakarta             | AA   | AA   |
| 10 | Kalsel   | Tabalong               | AA   | AA   |
| 11 | Jatim    | Gresik                 | A    | A    |
| 12 | Jatim    | Sidoarjo               | BB   | A    |
| 13 | Bali     | Badung                 | BBB  | BBB  |
| 14 | Banten   | Tangerang              | C    | BBB  |
| 15 | Sulsel   | Luwu Utara             | AA   | BB   |
| 16 | Sulteng  | Morowali               | AA   | BB   |
| 17 | Sumut    | Tanah Karo             | AA   | BB   |
| 18 | Sulteng  | Toli Toli              | AA   | BB   |
| 19 | Kalteng  | Barito Utara           | A    | BB   |
| 20 | Sulut    | Minahasa               | BBB  | BB   |
| 21 | Kaltim   | Bulungan               | BB   | BB   |
| 22 | Jateng   | Kudus                  | BB   | BB   |
| 23 | Riau     | Pelalawan              | BB   | BB   |
| 24 | Sulsel   | Maros                  | B    | BB   |
| 25 | Sumsel   | Musi Banyuasin         | B    | BB   |
| 26 | Riau     | Rokan Hulu             | B    | BB   |
| 27 | Kalsel   | Tapin                  | C    | BB   |
| 28 | Kaltim   | Pasir                  | AA   | B    |
| 29 | Riau     | Kuantan Senggigi       | BB   | B    |
| 30 | Lampung  | Lampung Timur          | BB   | B    |
| 31 | Kaltim   | Nunukan                | BB   | B    |
| 32 | Kaltim   | Kutai Kertanegara      | B    | B    |
| 33 | Sulsel   | Pangkajene & Kepulauan | C    | B    |
| 34 | Jabar    | Karawang               | D    | B    |
| 35 | Jabar    | Indramayu              | AA   | C    |
| 36 | Jambi    | Tanjung Jabung Timur   | AA   | C    |
| 37 | Sulteng  | Banggai                | BB   | C    |
| 38 | Sumsel   | Muara Enim             | B    | C    |
| 39 | Kalbar   | Sanggau                | B    | C    |
| 40 | Jabar    | Bandung                | C    | C    |
| 41 | Babel    | Bangka                 | C    | C    |
| 42 | Kalteng  | Barito Selatan         | C    | C    |
| 43 | Babel    | Belitung               | C    | C    |
| 44 | Riau     | Bengkalis              | C    | C    |
| 45 | Jambi    | Bungo                  | C    | C    |
| 46 | Jabar    | Ciamis                 | C    | C    |

| NO | PROPINSI | KABUPATEN            | 2003 | 2004 |
|----|----------|----------------------|------|------|
| 47 | Sumut    | Deli Serdang         | C    | C    |
| 48 | Bali     | Gianyar              | C    | C    |
| 49 | DIY      | Gunung Kidul         | C    | C    |
| 50 | Kalsel   | Hulu Sungai Selatan  | C    | C    |
| 51 | Riau     | Indragiri Hilir      | C    | C    |
| 52 | Papua    | Jayawijaya           | C    | C    |
| 53 | Bali     | Jembrana             | C    | C    |
| 54 | Kalteng  | Kapuas               | C    | C    |
| 55 | Jateng   | Karang Anyar         | C    | C    |
| 56 | Jambi    | Kerinci              | C    | C    |
| 57 | Lampung  | Lampung Barat        | C    | C    |
| 58 | Sumbar   | Pesisir Selatan      | C    | C    |
| 59 | Sulsel   | Pinrang              | C    | C    |
| 60 | Kalbar   | Pontianak            | C    | C    |
| 61 | Sulut    | Sangihe              | C    | C    |
| 62 | Sumut    | Simalungun           | C    | C    |
| 63 | Papua    | Sorong               | C    | C    |
| 64 | Sulsel   | Bantaeng             | D    | C    |
| 65 | DIY      | Bantul               | D    | C    |
| 66 | Jatim    | Banyuwangi           | D    | C    |
| 67 | NTT      | Ende                 | D    | C    |
| 68 | Sulsel   | Enrekang             | D    | C    |
| 69 | Jatim    | Mojokerto            | D    | C    |
| 70 | NTT      | Ngada                | D    | C    |
| 71 | Jabar    | Sukabumi             | D    | C    |
| 72 | Jateng   | Sukoharjo            | D    | C    |
| 73 | Kalsel   | Tanah Laut           | D    | C    |
| 74 | Sumut    | Tapanuli Utara       | D    | C    |
| 75 | Jabar    | Tasikmalaya          | D    | C    |
| 76 | NTT      | Timor Tengah Selatan | D    | C    |
| 77 | Papua    | Fakfak               | E    | C    |
| 78 | Kalsel   | Hulu Sungai Tengah   | E    | C    |
| 79 | Bali     | Klungkung            |      | C    |
| 80 | Papua    | Manokwari            | B    | D    |
| 81 | Sulteng  | Donggala             | C    | D    |
| 82 | Sulsel   | Gowa                 | C    | D    |
| 83 | Kalbar   | Kapuas Hulu          | C    | D    |
| 84 | Sultra   | Kolaka               | C    | D    |
| 85 | Sulsel   | Majene               | C    | D    |
| 86 | Bali     | Tabanan              | C    | D    |
| 87 | Sulsel   | Tana Toraja          | C    | D    |
| 88 | Jambi    | Tebo                 | C    | D    |
| 89 | Jatim    | Tulungagung          | C    | D    |
| 90 | Jatim    | Bangkalan            | D    | D    |
| 91 | Bali     | Bangli               | D    | D    |
| 92 | Sulsel   | Barru                | D    | D    |

| NO  | PROPINSI | KABUPATEN            | 2003 | 2004 |
|-----|----------|----------------------|------|------|
| 93  | Jambi    | Batanghari           | D    | D    |
| 94  | Bengkulu | Bengkulu Selatan     | D    | D    |
| 95  | Jatim    | Blitar               | D    | D    |
| 96  | Jabar    | Bogor                | D    | D    |
| 97  | Jateng   | Boyolali             | D    | D    |
| 98  | Bali     | Buleleng             | D    | D    |
| 99  | Jabar    | Cianjur              | D    | D    |
| 100 | Jatim    | Jember               | D    | D    |
| 101 | Sulsel   | Jeneponto            | D    | D    |
| 102 | Jateng   | Jepara               | D    | D    |
| 103 | Jatim    | Jombang              | D    | D    |
| 104 | Riau     | Kampar               | D    | D    |
| 105 | Jatim    | Kediri               | D    | D    |
| 106 | Jateng   | Kendal               | D    | D    |
| 107 | Jateng   | Klaten               | D    | D    |
| 108 | Jabar    | Kuningan             | D    | D    |
| 109 | Sumsel   | Lahat                | D    | D    |
| 110 | Lampung  | Lampung Selatan      | D    | D    |
| 111 | ampung   | Lampung Utara        | D    | D    |
| 112 | Banten   | Lebak                | D    | D    |
| 113 | Sulsel   | Luwu                 | D    | D    |
| 114 | Jateng   | Magelang             | D    | D    |
| 115 | Jatim    | Magetan              | D    | D    |
| 116 | Papua    | Mimika               | D    | D    |
| 117 | Sumsel   | Ogan Komering Ilir   | D    | D    |
| 118 | Sumbar   | Pasaman              | D    | D    |
| 119 | Jateng   | Pekalongan           | D    | D    |
| 120 | Jateng   | Pemalang             | D    | D    |
| 121 | Kalbar   | Sambas               | D    | D    |
| 122 | Sumbar   | Sawahlunto Sijunjung | D    | D    |
| 123 | Banten   | Serang               | D    | D    |
| 124 | Sulsel   | Sinjai               | D    | D    |
| 125 | Sumbar   | Solok                | D    | D    |
| 126 | Jabar    | Subang               | D    | D    |
| 127 | Jabar    | Sumedang             | D    | D    |

| NO  | PROPINSI  | KABUPATEN          | 2003 | 2004 |
|-----|-----------|--------------------|------|------|
| 128 | Sulsel    | Takalar            | D    | D    |
| 129 | NTT       | Timor Tengah Utara | D    | D    |
| 130 | Lampung   | Way Kanan          | D    | D    |
| 131 | Jateng    | Banyumas           | E    | D    |
| 132 | NTT       | Belu               | E    | D    |
| 133 | Sulsel    | Bone               | E    | D    |
| 134 | Jabar     | Cirebon            | E    | D    |
| 135 | Jabar     | Garut              | E    | D    |
| 136 | Jatim     | Pasuruan           | E    | D    |
| 137 | NTT       | Sumba Barat        | E    | D    |
| 138 | Bengkulu  | Rejang Lebong      |      | D    |
| 139 | Jatim     | Situbondo          |      | D    |
| 140 | Kalsel    | Hulu Sungai Utara  | BBB  | E    |
| 141 | NTB       | Dompu              | C    | E    |
| 142 | NTB       | Lombok Timur       | C    | E    |
| 143 | Bali      | Karang Asem        | D    | E    |
| 144 | Kalbar    | Ketapang           | D    | E    |
| 145 | Jatim     | Lamongan           | D    | E    |
| 146 | NTT       | Manggarai          | D    | E    |
| 147 | Sumsel    | Musi Rawas         | D    | E    |
| 148 | Sulteng   | Poso               | D    | E    |
| 149 | Sulsel    | Selayar            | D    | E    |
| 150 | NTB       | Bima               | E    | E    |
| 151 | Jatim     | Bondowoso          | E    | E    |
| 152 | Sultra    | Buton              | E    | E    |
| 153 | NTT       | Flores Timur       | E    | E    |
| 154 | Gorontalo | Gorontalo          | E    | E    |
| 155 | Jateng    | Kebumen            | E    | E    |
| 156 | NTB       | Lombok Barat       | E    | E    |
| 157 | Jatim     | Pamekasan          | E    | E    |
| 158 | Jatim     | Ponorogo           | E    | E    |
| 159 | Jateng    | Tegal              | E    | E    |
| 160 | Bengkulu  | Bengkulu Utara     |      | E    |
| 161 | Jateng    | Wonosobo           |      | E    |

**Keterangan :**

 : Mengalami peningkatan peringkat

 : Mengalami penurunan peringkat

 : Tidak berubah

**Lampiran 6.1 : Peringkat 53 Kota Berdasarkan Faktor Tenaga Kerja & Produktivitas/**  
*Ranking of 53 Cities Based on the Labour & Productivity Score*

| NO | PROPINSI | KOTA           | 2003 | 2004 | NO | PROPINSI  | KOTA             | 2003 | 2004 |
|----|----------|----------------|------|------|----|-----------|------------------|------|------|
| 1  | Jabar    | Cirebon        | AAA  | AA   | 28 | Sulsel    | Pare-Pare        | C    | C    |
| 2  | Jatim    | Kediri         | AAA  | AA   | 29 | Riau      | Pekan Baru       | C    | C    |
| 3  | Sumsel   | Palembang      | AAA  | AA   | 30 | Sumut     | Pematang Siantar | C    | C    |
| 4  | Lampung  | Bandar Lampung | AA   | AA   | 31 | Jabar     | Sukabumi         | C    | C    |
| 5  | Jatim    | Surabaya       | A    | AA   | 32 | Jateng    | Tegal            | C    | C    |
| 6  | Sumut    | Binjai         | BB   | AA   | 33 | DIY       | Yogyakarta       | C    | C    |
| 7  | Sumbar   | Padang         | BB   | AA   | 34 | Jateng    | Surakarta        | D    | C    |
| 8  | DKI      | Jakarta        | C    | AA   | 35 | Kalsel    | Banjarmasin      |      | C    |
| 9  | Jatim    | Malang         | C    | AA   | 36 | Jambi     | Jambi            |      | C    |
| 10 | Kaltim   | Samarinda      | C    | AA   | 37 | Papua     | Jayapura         |      | C    |
| 11 | Sumbar   | Sawah Lunto    | C    | AA   | 38 | Kalteng   | Palangkaraya     |      | C    |
| 12 | Banten   | Tangerang      | C    | AA   | 39 | Sulteng   | Palu             |      | C    |
| 13 | Sumut    | Sibolga        | D    | AA   | 40 | Riau      | Tanjung Pinang   |      | C    |
| 14 | Papua    | Sorong         |      | AA   | 41 | Kaltim    | Balikpapan       | AA   | D    |
| 15 | Sulsel   | Makasar        |      | A    | 42 | Riau      | Batam            | AA   | D    |
| 16 | Jatim    | Madiun         | C    | BBB  | 43 | Banten    | Cilegon          | AA   | D    |
| 17 | Bengkulu | Bengkulu       | C    | BB   | 44 | Sumut     | Tanjung Balai    | AA   | D    |
| 18 | NTT      | Kupang         | D    | BB   | 45 | Gorontalo | Gorontalo        | BBB  | D    |
| 19 | Sultra   | Kendari        | A    | C    | 46 | Jabar     | Bekasi           | C    | D    |
| 20 | Jatim    | Probolinggo    | A    | C    | 47 | Bali      | Denpasar         | C    | D    |
| 21 | Jateng   | Semarang       | BB   | C    | 48 | Sulut     | Manado           | C    | D    |
| 22 | Jabar    | Bandung        | C    | C    | 49 | NTB       | Mataram          | C    | D    |
| 23 | Sulut    | Bitung         | C    | C    | 50 | Jatim     | Mojokerto        | C    | D    |
| 24 | Jabar    | Bogor          | C    | C    | 51 | Jateng    | Pekalongan       | C    | D    |
| 25 | Riau     | Dumai          | C    | C    | 52 | Sumut     | Tebing Tinggi    | C    | D    |
| 26 | Sumut    | Medan          | C    | C    | 53 | Kalbar    | Pontianak        |      | D    |
| 27 | Babel    | Pangkal Pinang | C    | C    |    |           |                  |      |      |

**Keterangan :**

- : Mengalami peningkatan peringkat  
 : Mengalami penurunan peringkat  
 : Tidak berubah

**Lampiran 6.2 : Peringkat 161 Kabupaten Berdasarkan Faktor Tenaga Kerja & Produktivitas/  
Ranking of 161 Regencies Based on the Labour & Productivity Score**

| NO | PROPINSI | KABUPATEN              | 2003 | 2004 |
|----|----------|------------------------|------|------|
| 1  | Jatim    | Gresik                 | C    | AAA  |
| 2  | Sultra   | Kolaka                 | AA   | AA   |
| 3  | Sumsel   | Lahat                  | AA   | AA   |
| 4  | Kalbar   | Sanggau                | AA   | AA   |
| 5  | Sumbar   | Solok                  | AA   | AA   |
| 6  | Jambi    | Batanghari             | A    | AA   |
| 7  | Jabar    | Bandung                | BBB  | AA   |
| 8  | Banten   | Tangerang              | BBB  | AA   |
| 9  | Babel    | Belitung               | BB   | AA   |
| 10 | Riau     | Bengkalis              | BB   | AA   |
| 11 | Sumut    | Langkat                | B    | AA   |
| 12 | Kalbar   | Pontianak              | B    | AA   |
| 13 | Bali     | Badung                 | C    | AA   |
| 14 | Kalteng  | Barito Selatan         | C    | AA   |
| 15 | Lampung  | Lampung Timur          | C    | AA   |
| 16 | Sumsel   | Musi Rawas             | C    | AA   |
| 17 | Sulteng  | Poso                   | C    | AA   |
| 18 | Banten   | Serang                 | C    | AA   |
| 19 | Sumut    | Simalungun             | C    | AA   |
| 20 | Sumut    | Tanah Karo             | C    | AA   |
| 21 | Lampung  | Lampung Selatan        | D    | AA   |
| 22 | Sumsel   | Musi Banyuasin         | D    | AA   |
| 23 | Jatim    | Banyuwangi             | E    | AA   |
| 24 | Bengkulu | Bengkulu Selatan       | E    | AA   |
| 25 | Bengkulu | Bengkulu Utara         |      | AA   |
| 26 | Bali     | Klungkung              |      | AA   |
| 27 | Sulsel   | Pangkajene & Kepulauan | AAA  | A    |
| 28 | Kaltim   | Bulungan               | AA   | A    |
| 29 | Riau     | Pelalawan              | C    | A    |
| 30 | Jabar    | Purwakarta             | C    | A    |
| 31 | Sulsel   | Bantaeng               | D    | A    |
| 32 | Jateng   | Kendal                 | D    | A    |
| 33 | Sulsel   | Barru                  | A    | BB   |
| 34 | Sulsel   | Takalar                | B    | BB   |
| 35 | Lampung  | Lampung Utara          | C    | BB   |
| 36 | Jabar    | Garut                  | D    | BB   |
| 37 | Sumbar   | Pesisir Selatan        | AAA  | C    |
| 38 | Sumut    | Asahan                 | AA   | C    |
| 39 | Jateng   | Cilacap                | AA   | C    |
| 40 | Sumut    | Labuhan Batu           | AA   | C    |
| 41 | Sulsel   | Maros                  | AA   | C    |
| 42 | Sulsel   | Gowa                   | A    | C    |
| 43 | Sulsel   | Bone                   | BB   | C    |
| 44 | Sumut    | Deli Serdang           | BB   | C    |
| 45 | Jabar    | Karawang               | BB   | C    |
| 46 | Jambi    | Tanjung Jabung Timur   | BB   | C    |

| NO | PROPINSI | KABUPATEN           | 2003 | 2004 |
|----|----------|---------------------|------|------|
| 47 | Jabar    | Bogor               | B    | C    |
| 48 | Jabar    | Cirebon             | B    | C    |
| 49 | Kalteng  | Barito Utara        | C    | C    |
| 50 | Sulteng  | Donggala            | C    | C    |
| 51 | Sulsel   | Enrekang            | C    | C    |
| 52 | Kalsel   | Hulu Sungai Selatan | C    | C    |
| 53 | Kalsel   | Hulu Sungai Tengah  | C    | C    |
| 54 | Jabar    | Indramayu           | C    | C    |
| 55 | Jateng   | Kudus               | C    | C    |
| 56 | Sulsel   | Luwu Utara          | C    | C    |
| 57 | Jatim    | Magetan             | C    | C    |
| 58 | Papua    | Mimika              | C    | C    |
| 59 | Sumbar   | Pasaman             | C    | C    |
| 60 | Jateng   | Pekalongan          | C    | C    |
| 61 | Sulsel   | Pinrang             | C    | C    |
| 62 | Jatim    | Sidoarjo            | C    | C    |
| 63 | Jabar    | Subang              | C    | C    |
| 64 | Sulsel   | Tana Toraja         | C    | C    |
| 65 | Jambi    | Tebo                | C    | C    |
| 66 | Lampung  | Way Kanan           | C    | C    |
| 67 | Jateng   | Banyumas            | D    | C    |
| 68 | NTB      | Bima                | D    | C    |
| 69 | NTT      | Ende                | D    | C    |
| 70 | Riau     | Indragiri Hilir     | D    | C    |
| 71 | Jatim    | Jember              | D    | C    |
| 72 | Sulsel   | Jeneponto           | D    | C    |
| 73 | Jatim    | Jombang             | D    | C    |
| 74 | Riau     | Kampar              | D    | C    |
| 75 | Jambi    | Kerinci             | D    | C    |
| 76 | Jatim    | Lamongan            | D    | C    |
| 77 | Lampung  | Lampung Barat       | D    | C    |
| 78 | Sulsel   | Luwu                | D    | C    |
| 79 | Sulsel   | Majene              | D    | C    |
| 80 | Jatim    | Pamekasan           | D    | C    |
| 81 | Jatim    | Ponorogo            | D    | C    |
| 82 | Sulsel   | Selayar             | D    | C    |
| 83 | Jabar    | Sukabumi            | D    | C    |
| 84 | Jateng   | Sukoharjo           | D    | C    |
| 85 | Kalsel   | Tabalong            | D    | C    |
| 86 | Jateng   | Tegal               | D    | C    |
| 87 | Jatim    | Tulungagung         | D    | C    |
| 88 | Sulteng  | Morowali            | D    | C    |
| 89 | Jatim    | Bondowoso           | E    | C    |
| 90 | Jabar    | Ciamis              | E    | C    |
| 91 | DIY      | Gunung Kidul        | E    | C    |
| 92 | Jateng   | Kebumen             | E    | C    |

| NO  | PROPINSI  | KABUPATEN            | 2003 | 2004 |
|-----|-----------|----------------------|------|------|
| 93  | Kaltim    | Kutai Timur          | E    | C    |
| 94  | NTB       | Lombok Barat         | E    | C    |
| 95  | NTB       | Lombok Timur         | E    | C    |
| 96  | Jateng    | Pemalang             | E    | C    |
| 97  | Jabar     | Tasikmalaya          | E    | C    |
| 98  | Bengkulu  | Rejang Lebong        |      | C    |
| 99  | Jatim     | Situbondo            |      | C    |
| 100 | Jateng    | Wonosobo             |      | C    |
| 101 | Babel     | Bangka               | AA   | D    |
| 102 | Jabar     | Bekasi               | AA   | D    |
| 103 | Papua     | Sorong               | BBB  | D    |
| 104 | Bali      | Bangli               | C    | D    |
| 105 | Bali      | Buleleng             | C    | D    |
| 106 | Sultra    | Buton                | C    | D    |
| 107 | Gorontalo | Gorontalo            | C    | D    |
| 108 | Bali      | Jembrana             | C    | D    |
| 109 | Kalteng   | Kapuas               | C    | D    |
| 110 | Kalbar    | Ketapang             | C    | D    |
| 111 | Jateng    | Klaten               | C    | D    |
| 112 | Riau      | Kuantan Senggigi     | C    | D    |
| 113 | Kaltim    | Kutai Kertanegara    | C    | D    |
| 114 | Banten    | Lebak                | C    | D    |
| 115 | Sulut     | Minahasa             | C    | D    |
| 116 | Jatim     | Mojokerto            | C    | D    |
| 117 | Sumsel    | Muara Enim           | C    | D    |
| 118 | Riau      | Rokan Hulu           | C    | D    |
| 119 | Kalbar    | Sambas               | C    | D    |
| 120 | Sumbar    | Sawahlunto Sijunjung | C    | D    |
| 121 | Jabar     | Sumedang             | C    | D    |
| 122 | Kalsel    | Tanah Laut           | C    | D    |
| 123 | Sumut     | Tapanuli Utara       | C    | D    |
| 124 | Sulteng   | Banggai              | D    | D    |
| 125 | DIY       | Bantul               | D    | D    |
| 126 | NTT       | Belu                 | D    | D    |
| 127 | Kaltim    | Berau                | D    | D    |

| NO  | PROPINSI | KABUPATEN            | 2003 | 2004 |
|-----|----------|----------------------|------|------|
| 128 | Jateng   | Boyolali             | D    | D    |
| 129 | Jambi    | Bungo                | D    | D    |
| 130 | Jabar    | Cianjur              | D    | D    |
| 131 | NTB      | Dompu                | D    | D    |
| 132 | NTT      | Flores Timur         | D    | D    |
| 133 | Bali     | Gianyar              | D    | D    |
| 134 | Papua    | Jayawijaya           | D    | D    |
| 135 | Jateng   | Karang Anyar         | D    | D    |
| 136 | Jatim    | Kediri               | D    | D    |
| 137 | Jabar    | Kuningan             | D    | D    |
| 138 | Jateng   | Magelang             | D    | D    |
| 139 | NTT      | Manggarai            | D    | D    |
| 140 | Kaltim   | Nunukan              | D    | D    |
| 141 | Sumsel   | Ogan Komering Ilir   | D    | D    |
| 142 | Jatim    | Pasuruan             | D    | D    |
| 143 | Sulsel   | Sinjai               | D    | D    |
| 144 | Kalsel   | Tapin                | D    | D    |
| 145 | Sulteng  | Toli Toli            | D    | D    |
| 146 | Jatim    | Bangkalan            | E    | D    |
| 147 | Sumut    | Dairi                | E    | D    |
| 148 | Jateng   | Jepara               | E    | D    |
| 149 | Papua    | Manokwari            | E    | D    |
| 150 | NTT      | Ngada                | E    | D    |
| 151 | NTT      | Timor Tengah Selatan | E    | D    |
| 152 | Kalbar   | Kapuas Hulu          | C    | E    |
| 153 | Bali     | Karang Asem          | C    | E    |
| 154 | Sulut    | Sangihe              | C    | E    |
| 155 | Bali     | Tabanan              | C    | E    |
| 156 | Kalsel   | Hulu Sungai Utara    | D    | E    |
| 157 | Jatim    | Blitar               | E    | E    |
| 158 | Papua    | Fakfak               | E    | E    |
| 159 | Kaltim   | Pasir                | E    | E    |
| 160 | NTT      | Sumba Barat          | E    | E    |
| 161 | NTT      | Timor Tengah Utara   | E    | E    |

**Keterangan :**

 : Mengalami peningkatan peringkat

 : Mengalami penurunan peringkat

 : Tidak berubah

**Lampiran 7.1 : Peringkat 161 Kabupaten Berdasarkan Faktor Infrastruktur Fisik/  
Ranking of 53 Cities Based on the Labour & Productivity Score**

| NO | PROPINSI  | KOTA          | 2003 | 2004 |
|----|-----------|---------------|------|------|
| 1  | Riau      | Batam         | AAA  | AAA  |
| 2  | DKI       | Jakarta       | AAA  | AAA  |
| 3  | Jatim     | Surabaya      | AAA  | AAA  |
| 4  | Banten    | Cilegon       | AA   | AAA  |
| 5  | Bali      | Denpasar      | AA   | AAA  |
| 6  | Sumut     | Medan         | A    | AAA  |
| 7  | Banten    | Tangerang     | BB   | AAA  |
| 8  | Jateng    | Tegal         | BB   | AAA  |
| 9  | Sulsel    | Makasar       |      | AAA  |
| 10 | Jabar     | Bogor         | AAA  | AA   |
| 11 | Jatim     | Probolinggo   | AAA  | AA   |
| 12 | Jatim     | Malang        | AA   | AA   |
| 13 | Sulsel    | Pare-Pare     | AA   | AA   |
| 14 | Jateng    | Semarang      | AA   | AA   |
| 15 | Jateng    | Surakarta     | AA   | AA   |
| 16 | Jatim     | Kediri        | A    | AA   |
| 17 | Jabar     | Bandung       | BB   | AA   |
| 18 | Jatim     | Mojokerto     | BB   | AA   |
| 19 | DIY       | Yogyakarta    | BB   | AA   |
| 20 | Jabar     | Bekasi        | B    | AA   |
| 21 | Kaltim    | Balikpapan    | C    | AA   |
| 22 | Gorontalo | Gorontalo     | C    | AA   |
| 23 | NTB       | Mataram       | C    | AA   |
| 24 | Sumsel    | Palembang     | C    | AA   |
| 25 | Jateng    | Pekalongan    | C    | AA   |
| 26 | Sumut     | Tebing Tinggi | C    | AA   |
| 27 | Jabar     | Sukabumi      | C    | A    |

| NO | PROPINSI | KOTA             | 2003 | 2004 |
|----|----------|------------------|------|------|
| 28 | Riau     | Pekan Baru       | C    | BBB  |
| 29 | Riau     | Dumai            | C    | BB   |
| 30 | Jatim    | Madiun           | C    | BB   |
| 31 | Sumut    | Tanjung Balai    | D    | BB   |
| 32 | Kalbar   | Pontianak        |      | BB   |
| 33 | NTT      | Kupang           | AA   | C    |
| 34 | Sumbar   | Padang           | AA   | C    |
| 35 | Jabar    | Cirebon          | BB   | C    |
| 36 | Sulut    | Manado           | BB   | C    |
| 37 | Sumut    | Sibolga          | BB   | C    |
| 38 | Lampung  | Bandar Lampung   | C    | C    |
| 39 | Sumut    | Binjai           | C    | C    |
| 40 | Sulut    | Bitung           | C    | C    |
| 41 | Sultra   | Kendari          | C    | C    |
| 42 | Sumbar   | Sawah Lunto      | C    | C    |
| 43 | Babel    | Pangkal Pinang   | D    | C    |
| 44 | Kaltim   | Samarinda        | E    | C    |
| 45 | Kalsel   | Banjarmasin      |      | C    |
| 46 | Jambi    | Jambi            |      | C    |
| 47 | Kalteng  | Palangkaraya     |      | C    |
| 48 | Riau     | Tanjung Pinang   |      | C    |
| 49 | Sumut    | Pematang Siantar | C    | D    |
| 50 | Sulteng  | Palu             |      | D    |
| 51 | Bengkulu | Bengkulu         | D    | E    |
| 52 | Papua    | Jayapura         |      | E    |
| 53 | Papua    | Sorong           |      | E    |

**Keterangan :**

 : Mengalami peningkatan peringkat

 : Mengalami penurunan peringkat

 : Tidak berubah

**Lampiran 7.2 : Peringkat 161 Kabupaten Berdasarkan Faktor Infrastruktur Fisik/**  
*Ranking of 161 Regencies Based on the Physical Infrastructure Score*

| NO | PROPINSI | KABUPATEN   | 2003 | 2004 |
|----|----------|-------------|------|------|
| 1  | Jatim    | Gresik      | AAA  | AAA  |
| 2  | Jabar    | Indramayu   | AA   | AAA  |
| 3  | Banten   | Tangerang   | AA   | AAA  |
| 4  | Jabar    | Karawang    | BB   | AAA  |
| 5  | Jateng   | Kudus       | C    | AAA  |
| 6  | Jatim    | Mojokerto   | C    | AAA  |
| 7  | Jatim    | Pasuruan    | C    | AAA  |
| 8  | Jabar    | Bekasi      | AAA  | AA   |
| 9  | Bali     | Gianyar     | AAA  | AA   |
| 10 | Sulsel   | Gowa        | AA   | AA   |
| 11 | Jateng   | Pekalongan  | AA   | AA   |
| 12 | Bali     | Tabanan     | AA   | AA   |
| 13 | Jateng   | Klaten      | A    | AA   |
| 14 | Bali     | Badung      | BB   | AA   |
| 15 | Jatim    | Jombang     | BB   | AA   |
| 16 | Banten   | Serang      | BB   | AA   |
| 17 | Bali     | Jembrana    | B    | AA   |
| 18 | Jatim    | Banyuwangi  | C    | AA   |
| 19 | Jatim    | Blitar      | C    | AA   |
| 20 | Jateng   | Jepara      | C    | AA   |
| 21 | Jatim    | Lamongan    | C    | AA   |
| 22 | Jabar    | Sukabumi    | C    | AA   |
| 23 | Bali     | Klungkung   |      | AA   |
| 24 | Jabar    | Cirebon     | BB   | A    |
| 25 | DIY      | Bantul      | C    | A    |
| 26 | Sulsel   | Takalar     | C    | A    |
| 27 | Jabar    | Bogor       | BBB  | BBB  |
| 28 | Jabar    | Purwakarta  | BBB  | BBB  |
| 29 | Kalsel   | Tanah Laut  | C    | BBB  |
| 30 | Jabar    | Kuningan    | AA   | BB   |
| 31 | Sulsel   | Pinrang     | BBB  | BB   |
| 32 | Jateng   | Cilacap     | C    | BB   |
| 33 | Jateng   | Magelang    | C    | BB   |
| 34 | Sulsel   | Majene      | C    | BB   |
| 35 | Jatim    | Sidoarjo    | C    | BB   |
| 36 | Jabar    | Subang      | C    | BB   |
| 37 | Jatim    | Kediri      | D    | BB   |
| 38 | Jatim    | Tulungagung | D    | BB   |
| 39 | Jabar    | Tasikmalaya | AA   | B    |
| 40 | Sulsel   | Barru       | C    | B    |
| 41 | Sumut    | Asahan      | D    | B    |
| 42 | Jatim    | Bangkalan   | D    | B    |
| 43 | Jateng   | Tegal       | AAA  | C    |
| 44 | Sulsel   | Bantaeng    | AA   | C    |
| 45 | Bali     | Buleleng    | AA   | C    |
| 46 | Jabar    | Cianjur     | AA   | C    |

| NO | PROPINSI  | KABUPATEN              | 2003 | 2004 |
|----|-----------|------------------------|------|------|
| 47 | Sulsel    | Jeneponto              | AA   | C    |
| 48 | Jatim     | Magetan                | AA   | C    |
| 49 | Sulsel    | Maros                  | AA   | C    |
| 50 | Sumbar    | Sawahlunto Sijunjung   | AA   | C    |
| 51 | Sulsel    | Sinjai                 | AA   | C    |
| 52 | Sulsel    | Bone                   | A    | C    |
| 53 | Jateng    | Kendal                 | A    | C    |
| 54 | Banten    | Lebak                  | A    | C    |
| 55 | Sumbar    | Solok                  | A    | C    |
| 56 | Sulteng   | Banggai                | BBB  | C    |
| 57 | Bali      | Bangli                 | BBB  | C    |
| 58 | Sulsel    | Enrekang               | BBB  | C    |
| 59 | Sulut     | Minahasa               | BB   | C    |
| 60 | Jabar     | Garut                  | B    | C    |
| 61 | Bali      | Karang Asem            | B    | C    |
| 62 | Jateng    | Banyumas               | C    | C    |
| 63 | Jateng    | Boyolali               | C    | C    |
| 64 | Sumut     | Deli Serdang           | C    | C    |
| 65 | Sulteng   | Donggala               | C    | C    |
| 66 | Gorontalo | Gorontalo              | C    | C    |
| 67 | Jateng    | Karang Anyar           | C    | C    |
| 68 | Jateng    | Kebumen                | C    | C    |
| 69 | Sultra    | Kolaka                 | C    | C    |
| 70 | Kaltim    | Kutai Kertanegara      | C    | C    |
| 71 | Sumsel    | Lahat                  | C    | C    |
| 72 | NTB       | Lombok Barat           | C    | C    |
| 73 | Sulsel    | Luwu Utara             | C    | C    |
| 74 | Sumsel    | Ogan Komering Ilir     | C    | C    |
| 75 | Sulsel    | Pangkajene & Kepulauan | C    | C    |
| 76 | Sulut     | Sangihe                | C    | C    |
| 77 | Jateng    | Sukoharjo              | C    | C    |
| 78 | Sumut     | Tanah Karo             | C    | C    |
| 79 | NTT       | Timor Tengah Selatan   | C    | C    |
| 80 | Jabar     | Bandung                | D    | C    |
| 81 | Kaltim    | Bulungan               | D    | C    |
| 82 | Sultra    | Buton                  | D    | C    |
| 83 | Kalsel    | Hulu Sungai Selatan    | D    | C    |
| 84 | Kalsel    | Hulu Sungai Tengah     | D    | C    |
| 85 | Jatim     | Jember                 | D    | C    |
| 86 | NTB       | Lombok Timur           | D    | C    |
| 87 | Sumsel    | Musi Banyuasin         | D    | C    |
| 88 | Jateng    | Pemalang               | D    | C    |
| 89 | Jatim     | Ponorogo               | D    | C    |
| 90 | Kalbar    | Pontianak              | D    | C    |
| 91 | Kalsel    | Tabalong               | D    | C    |
| 92 | Babel     | Bangka                 | E    | C    |



| NO  | PROPINSI | KABUPATEN          | 2003 | 2004 |
|-----|----------|--------------------|------|------|
| 93  | NTB      | Bima               | E    | C    |
| 94  | Jatim    | Bondowoso          | E    | C    |
| 95  | NTB      | Dompu              | E    | C    |
| 96  | NTT      | Flores Timur       | E    | C    |
| 97  | Sumut    | Labuhan Batu       | E    | C    |
| 98  | Lampung  | Lampung Barat      | E    | C    |
| 99  | Lampung  | Lampung Selatan    | E    | C    |
| 100 | Lampung  | Lampung Timur      | E    | C    |
| 101 | Sumut    | Langkat            | E    | C    |
| 102 | Jatim    | Pamekasan          | E    | C    |
| 103 | Sumbar   | Pesisir Selatan    | E    | C    |
| 104 | Jatim    | Situbondo          |      | C    |
| 105 | Jateng   | Wonosobo           |      | C    |
| 106 | Jabar    | Sumedang           | B    | D    |
| 107 | Kalteng  | Barito Utara       | C    | D    |
| 108 | NTT      | Belu               | C    | D    |
| 109 | Jabar    | Ciamis             | C    | D    |
| 110 | Sumut    | Dairi              | C    | D    |
| 111 | NTT      | Ende               | C    | D    |
| 112 | Riau     | Kampar             | C    | D    |
| 113 | Kalteng  | Kapuas             | C    | D    |
| 114 | NTT      | Timor Tengah Utara | C    | D    |
| 115 | Babel    | Belitung           | D    | D    |
| 116 | DIY      | Gunung Kidul       | D    | D    |
| 117 | Kalsel   | Hulu Sungai Utara  | D    | D    |
| 118 | Papua    | Mimika             | D    | D    |
| 119 | Kaltim   | Nunukan            | D    | D    |
| 120 | Kaltim   | Pasir              | D    | D    |
| 121 | Sulteng  | Poso               | D    | D    |
| 122 | Papua    | Jayawijaya         | E    | D    |
| 123 | Jambi    | Kerinci            | E    | D    |
| 124 | Papua    | Manokwari          | E    | D    |
| 125 | Riau     | Pelalawan          | E    | D    |
| 126 | Sulsel   | Selayar            | E    | D    |
| 127 | Sumut    | Simalungun         | E    | D    |

| NO  | PROPINSI | KABUPATEN            | 2003 | 2004 |
|-----|----------|----------------------|------|------|
| 128 | Lampung  | Way Kanan            | E    | D    |
| 129 | Bengkulu | Bengkulu Utara       |      | D    |
| 130 | Bengkulu | Rejang Lebong        |      | D    |
| 131 | Riau     | Bengkalis            | C    | E    |
| 132 | Lampung  | Lampung Utara        | C    | E    |
| 133 | Sumsel   | Muara Enim           | C    | E    |
| 134 | Sumut    | Tapanuli Utara       | C    | E    |
| 135 | Kalteng  | Barito Selatan       | D    | E    |
| 136 | Jambi    | Bungo                | D    | E    |
| 137 | Papua    | Fakfak               | D    | E    |
| 138 | Riau     | Indragiri Hilir      | D    | E    |
| 139 | Kalbar   | Ketapang             | D    | E    |
| 140 | Sulsel   | Luwu                 | D    | E    |
| 141 | Sumbar   | Pasaman              | D    | E    |
| 142 | Kalbar   | Sanggau              | D    | E    |
| 143 | Papua    | Sorong               | D    | E    |
| 144 | Sulsel   | Tana Toraja          | D    | E    |
| 145 | Kalsel   | Tapin                | D    | E    |
| 146 | Jambi    | Batanghari           | E    | E    |
| 147 | Bengkulu | Bengkulu Selatan     | E    | E    |
| 148 | Kaltim   | Berau                | E    | E    |
| 149 | Kalbar   | Kapuas Hulu          | E    | E    |
| 150 | Riau     | Kuantan Senggigi     | E    | E    |
| 151 | Kaltim   | Kutai Timur          | E    | E    |
| 152 | NTT      | Manggarai            | E    | E    |
| 153 | Sulteng  | Morowali             | E    | E    |
| 154 | Sumsel   | Musi Rawas           | E    | E    |
| 155 | NTT      | Ngada                | E    | E    |
| 156 | Riau     | Rokan Hulu           | E    | E    |
| 157 | Kalbar   | Sambas               | E    | E    |
| 158 | NTT      | Sumba Barat          | E    | E    |
| 159 | Jambi    | Tanjung Jabung Timur | E    | E    |
| 160 | Jambi    | Tebo                 | E    | E    |
| 161 | Sulteng  | Toli Toli            | E    | E    |

**Keterangan :**

 : Mengalami peningkatan peringkat

 : Mengalami penurunan peringkat

 : Tidak berubah

**Lampiran 8 : Statistik Perubahan Peringkat Kabupaten /Kota Tahun 2003 - 2004/**  
*Statistic of Changes in Ranking*

| UMUM |       |      |           |
|------|-------|------|-----------|
|      | TOTAL | KOTA | KABUPATEN |
| B-A  | 5     | 3    | 2         |
| C-A  | 16    | 8    | 8         |
|      |       |      |           |
| A-B  | 10    | 1    | 9         |
| A-C  | 14    | 1    | 13        |

| SOSIAL KELEMBAGAAN |       |      |           |
|--------------------|-------|------|-----------|
|                    | TOTAL | KOTA | KABUPATEN |
| B-A                | 3     | 0    | 3         |
| C-A                | 14    | 6    | 8         |
| D-A                | 0     | 0    | 0         |
|                    |       |      |           |
| A-B                | 6     | 0    | 6         |
| A-C                | 16    | 0    | 16        |
| A-D                | 0     | 0    | 0         |

| SOSIAL POLITIK |       |      |           |
|----------------|-------|------|-----------|
|                | TOTAL | KOTA | KABUPATEN |
| B-A            | 3     | 0    | 3         |
| C-A            | 10    | 3    | 7         |
|                |       |      |           |
| A-B            | 15    | 2    | 13        |
| A-C            | 10    | 0    | 10        |

| SOSIAL EKONOMI DAERAH |       |      |           |
|-----------------------|-------|------|-----------|
|                       | TOTAL | KOTA | KABUPATEN |
| B-A                   | 6     | 5    | 1         |
| C-A                   | 5     | 4    | 1         |
| D-A                   | 1     | 1    | 0         |
|                       |       |      |           |
| A-B                   | 7     | 1    | 6         |
| A-C                   | 2     | 0    | 2         |
| A-D                   | 0     | 0    | 0         |

| SOSIAL TENAGA KERJA & PRODUKTIVITAS |       |      |           |
|-------------------------------------|-------|------|-----------|
|                                     | TOTAL | KOTA | KABUPATEN |
| B-A                                 | 12    | 6    | 6         |
| B-A                                 | 8     | 2    | 6         |
| C-A                                 | 16    | 5    | 11        |
| D-A                                 | 5     | 1    | 4         |
| E-A                                 | 2     | 0    | 2         |
|                                     |       |      |           |
| A-B                                 | 1     | 0    | 1         |
| A-C                                 | 8     | 2    | 6         |
| A-D                                 | 6     | 4    | 2         |

| SOSIAL INFRASTRUKTUR FISIK |       |      |           |
|----------------------------|-------|------|-----------|
|                            | TOTAL | KOTA | KABUPATEN |
| B-A                        | 12    | 6    | 6         |
| C-A                        | 17    | 7    | 10        |
| D-A                        | 0     | 0    | 0         |
|                            |       |      |           |
| A-B                        | 2     | 0    | 2         |
| A-C                        | 15    | 2    | 13        |
| A-D                        | 0     | 0    | 0         |

**Lampiran 9.1. : Hirarki dan Bobot Faktor, Variabel, Indikator, Intensitas Pemeringkatan/  
Weighting of Factors, Variables, Indicators and Intensity of Rating**

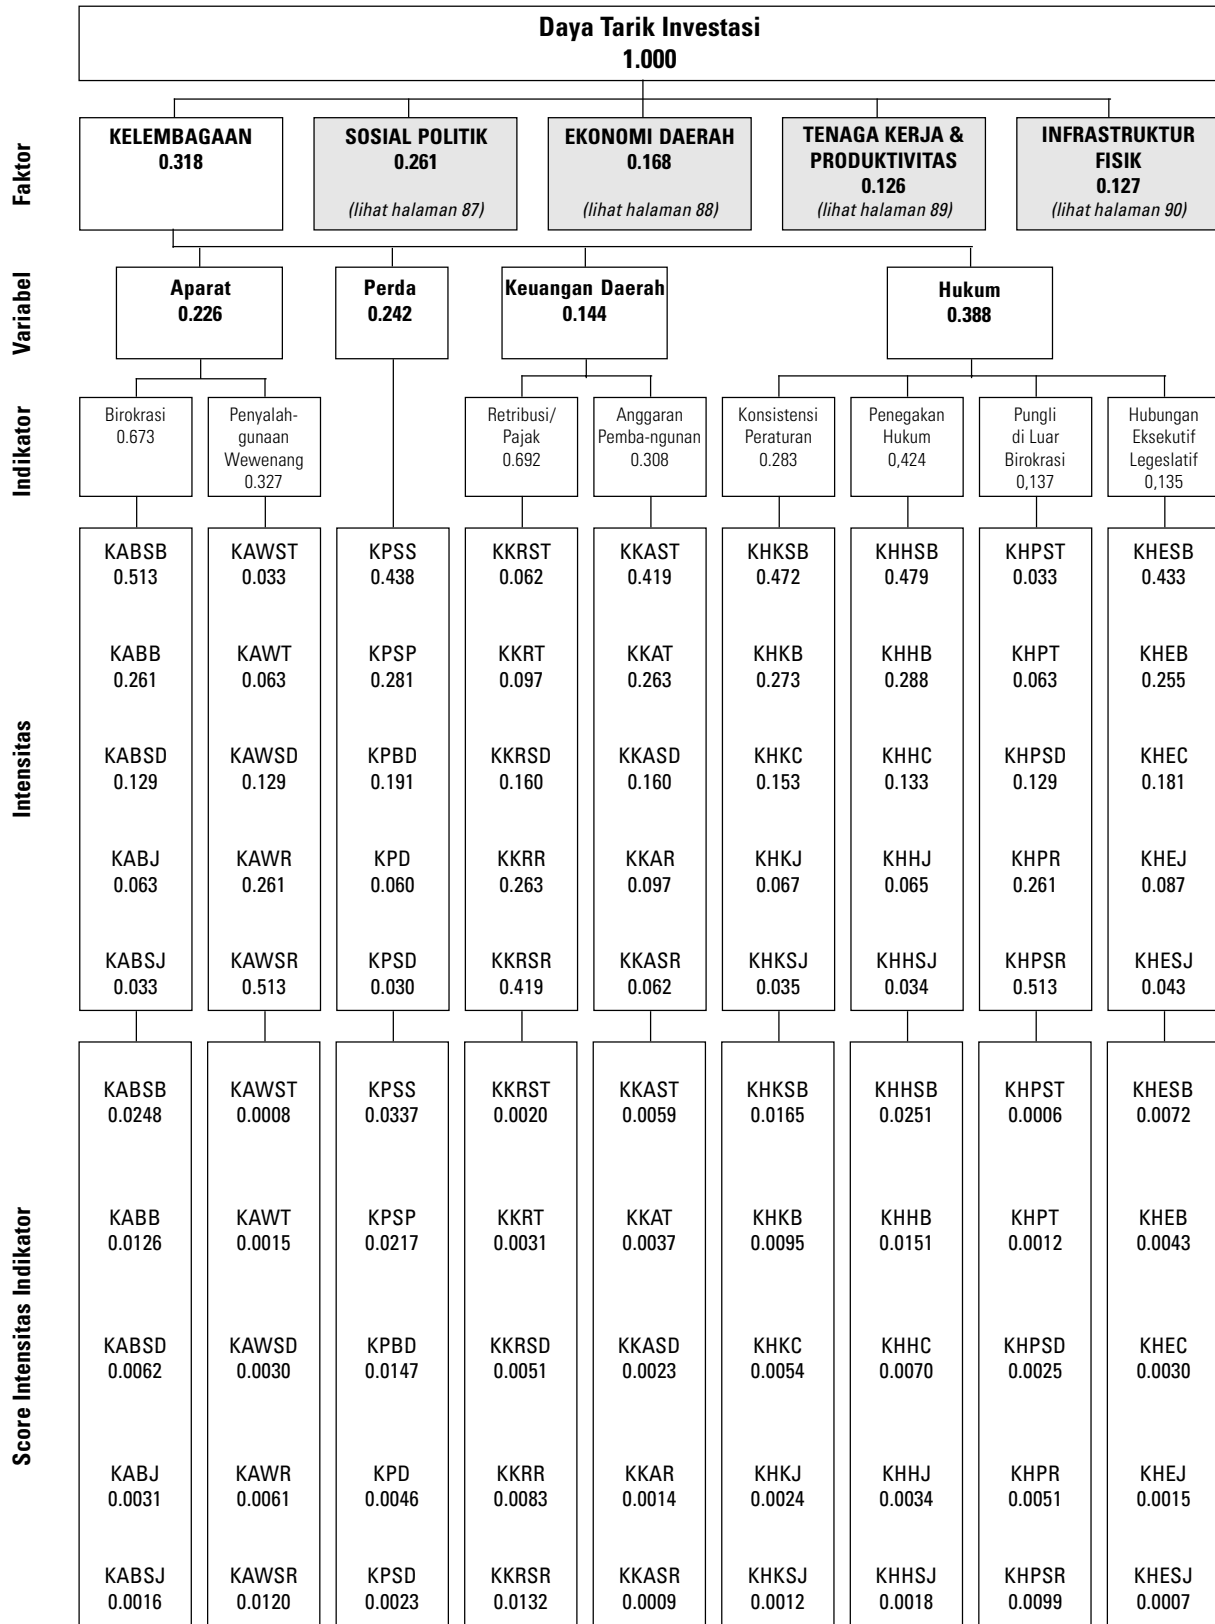

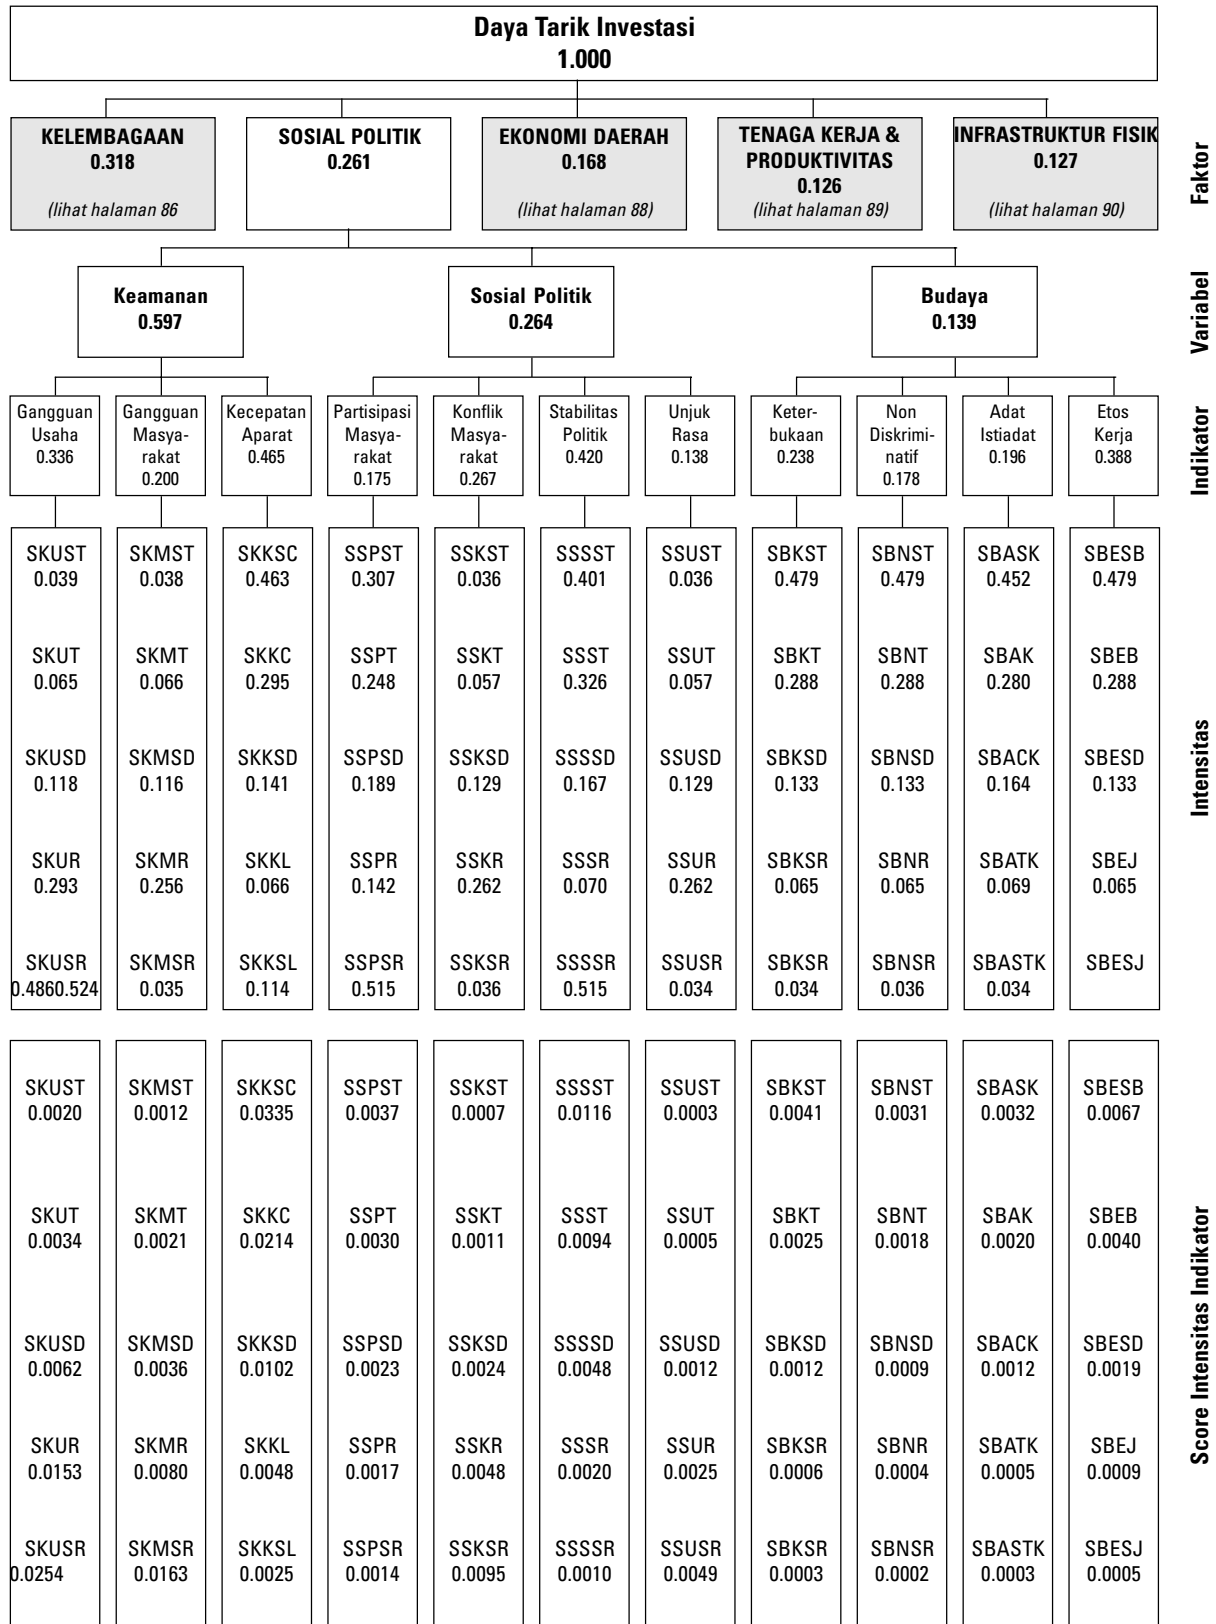

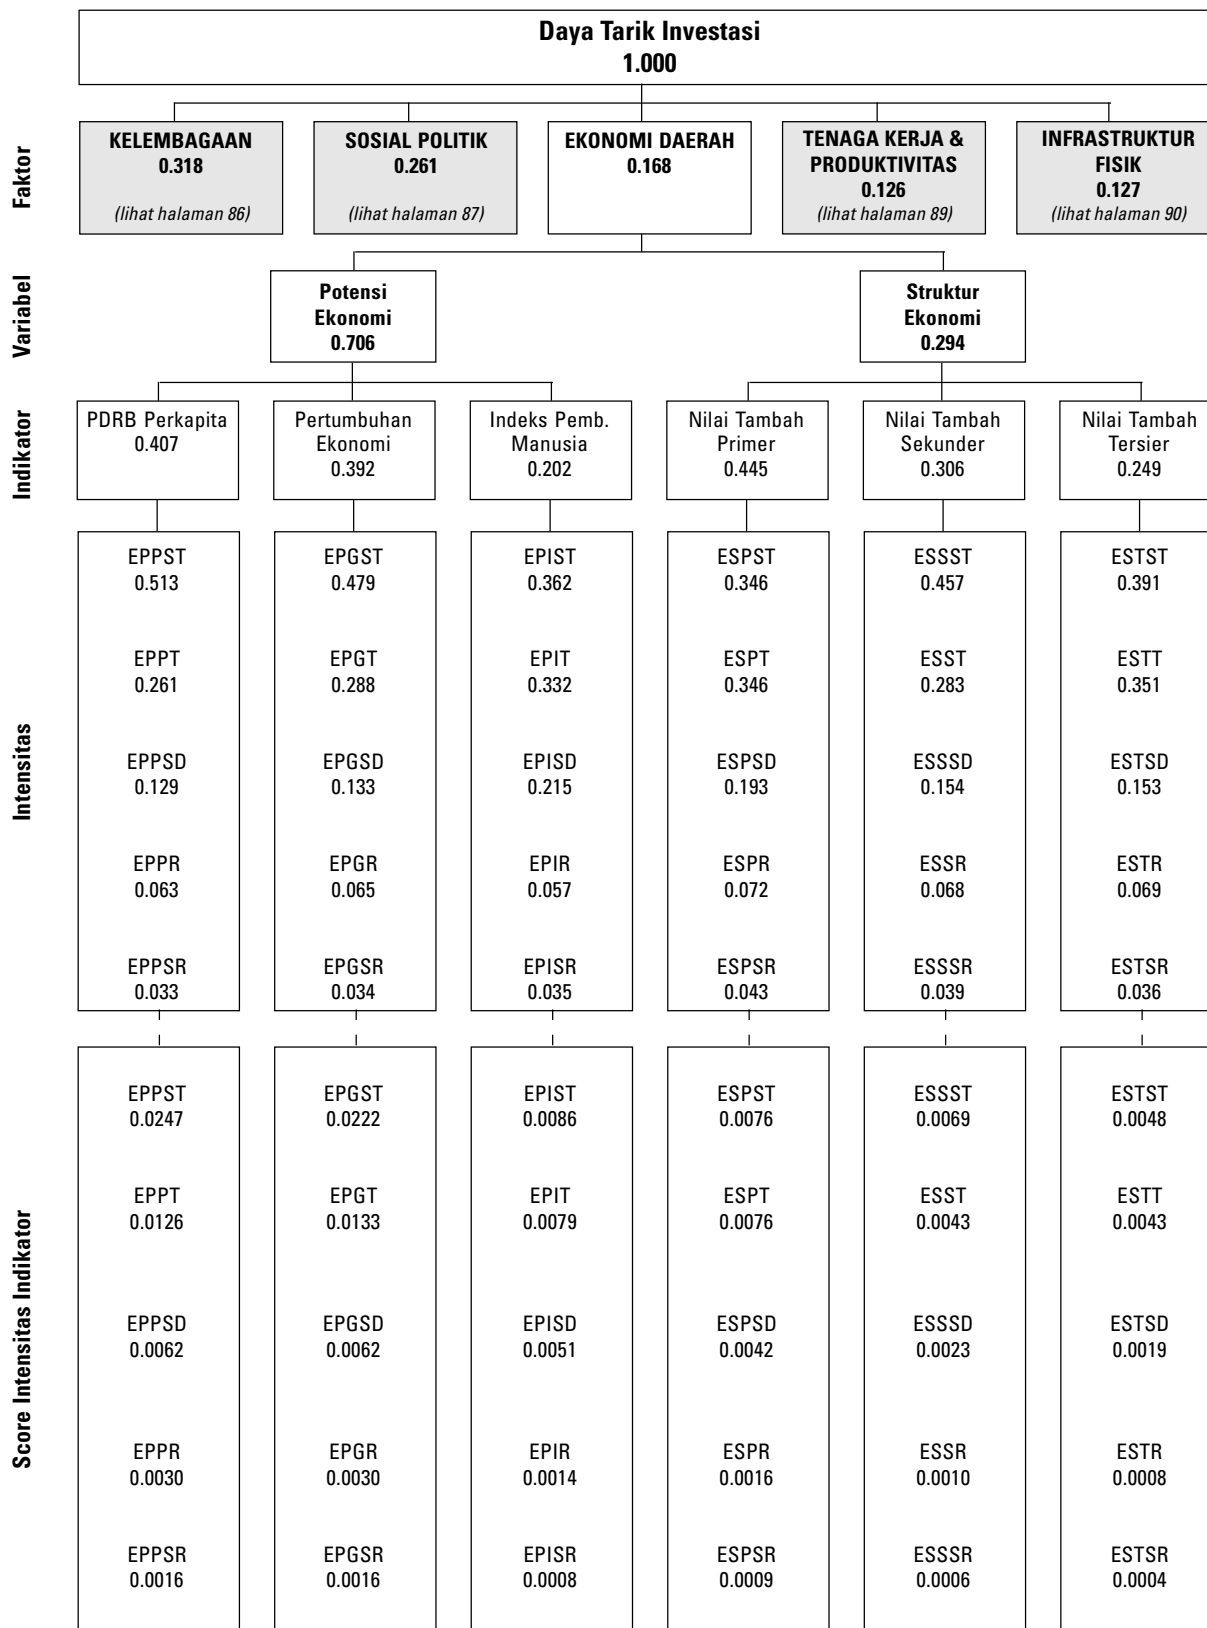

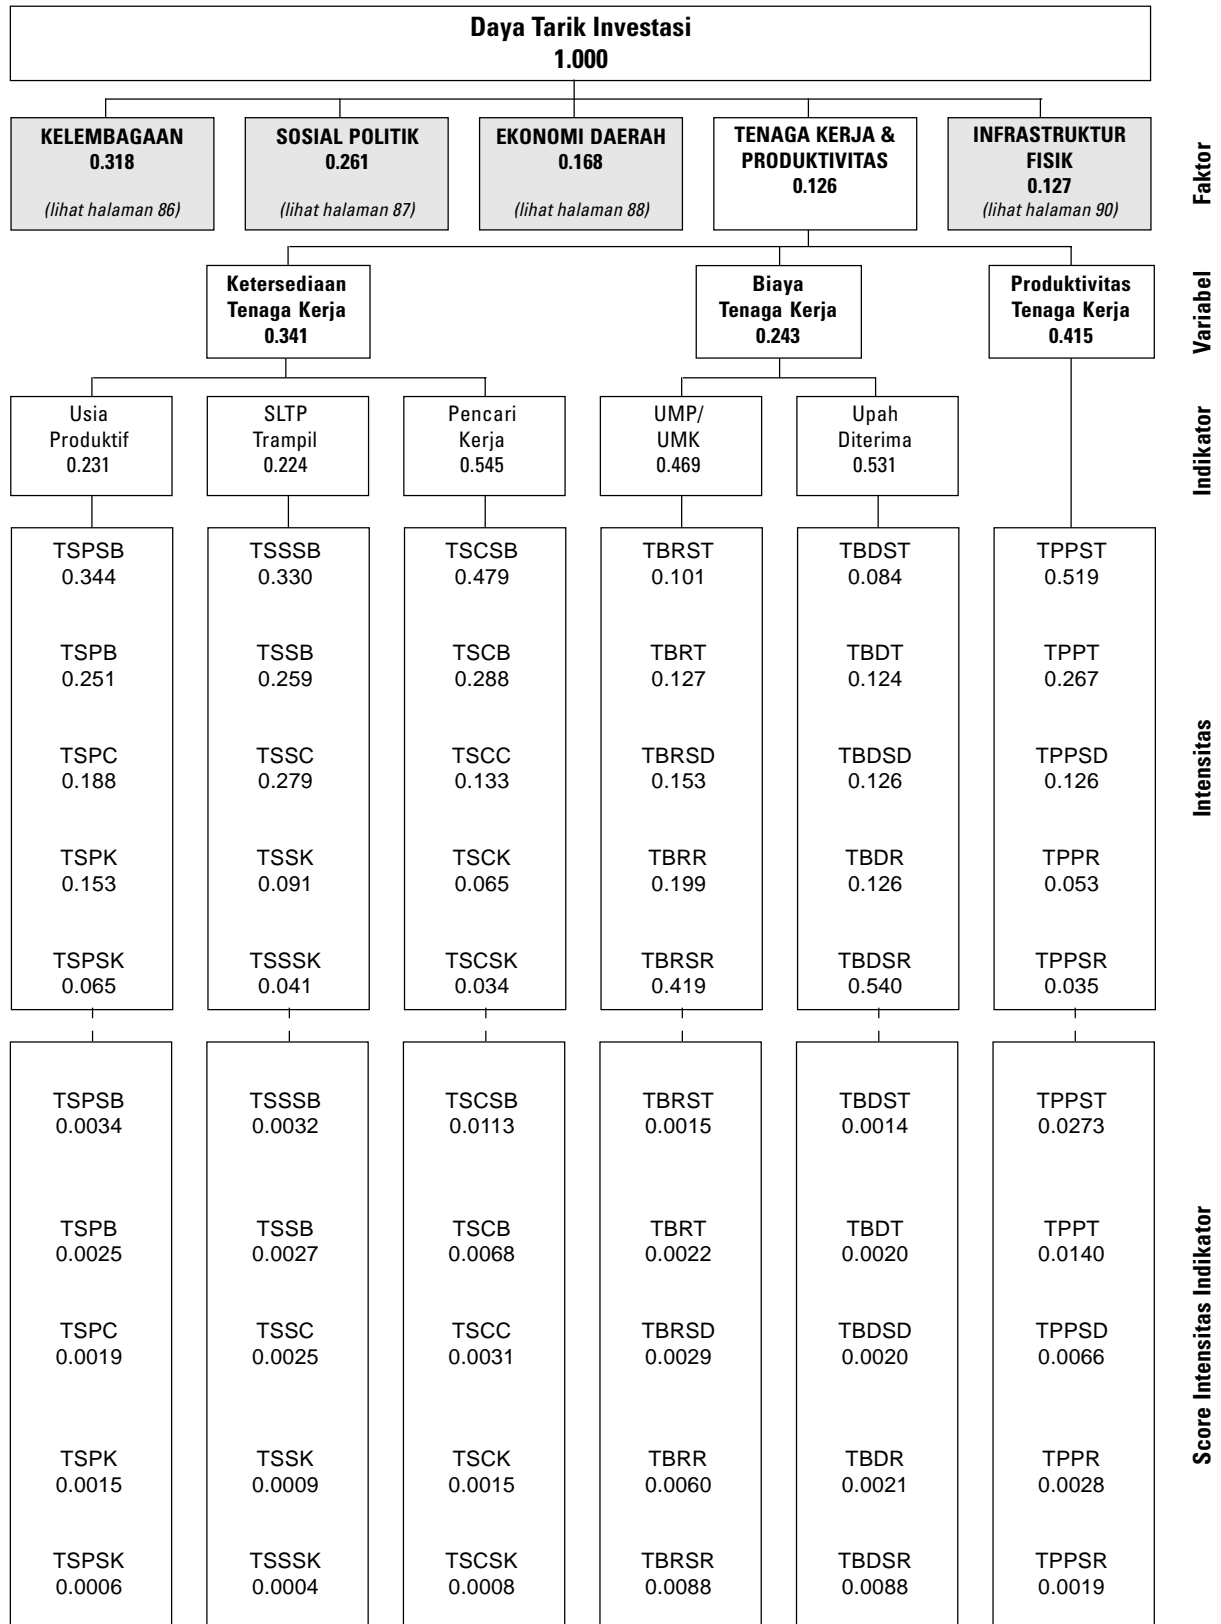

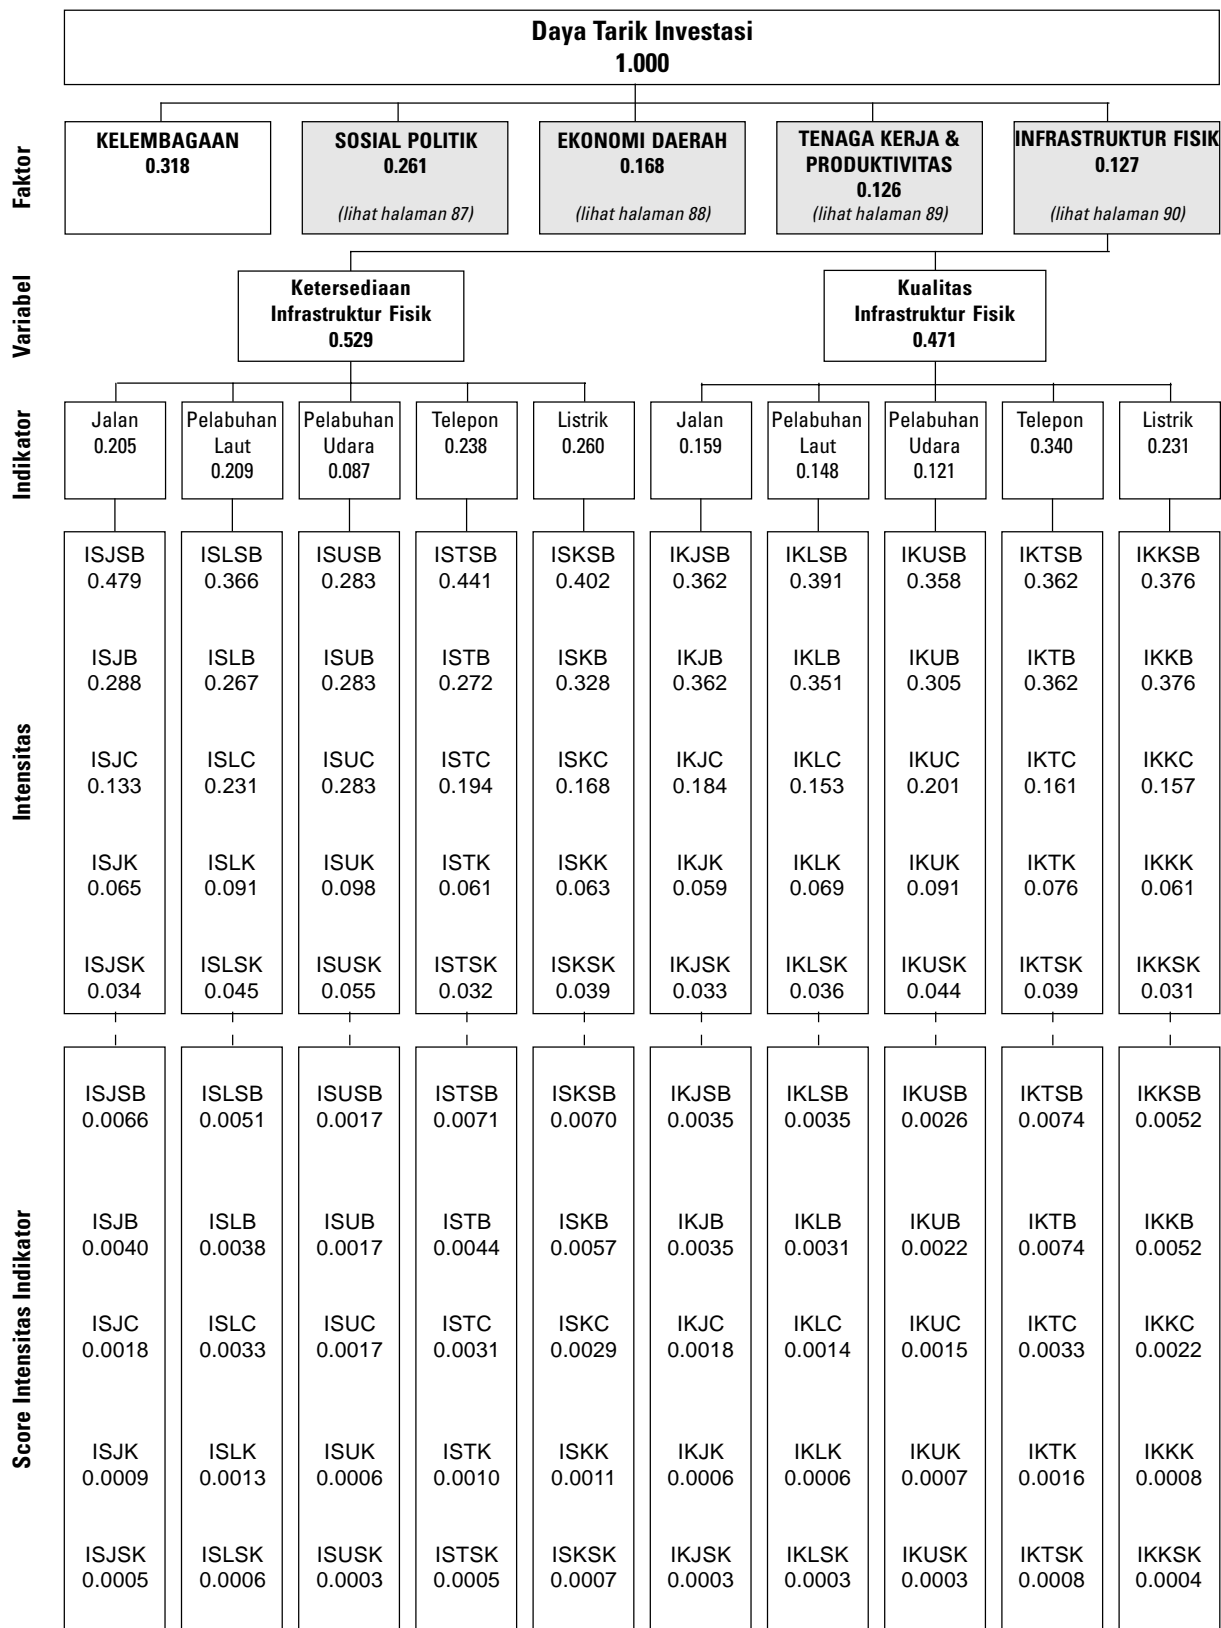

**Lampiran 9.2. : Penghitungan Nilai Intensitas Dengan Metode AHP/**  
*Calculation of the Value of Indicators Using AHP Method*

Indikator pemeringkatan ditentukan melalui studi literatur, lokakarya terbatas para ahli, dan hasil evaluasi pemeringkatan KPPOD tahun 2001. Hasil tersebut diolah lagi oleh sejumlah ahli terbatas dalam suatu *panel judgment* yang menghasilkan hasil akhir indikator dan hirarki pemeringkatan. Selanjutnya dengan pengolahan hasil pembobotan indikator dari *judgement* para ahli sebagaimana dijelaskan pada bagian **III.B.3.1.** ditentukan bobot indikator (skala penting tidaknya tiap indikator) terhadap daya tarik investasi suatu daerah, sebagaimana ditampilkan hasilnya dalam bagan **Lampiran 9.1.**

Dalam bagan hirarki pemeringkatan pada **Lampiran 9.1.** kita bisa lihat 5 faktor penentu daya tarik investasi suatu daerah, dilengkapi dengan bobot masing-masing. Apabila kita jumlahkan keseluruhan bobot masing-masing faktor (level pertama dari hirarki pemeringkatan) maka jumlah yang dihasilkan harus 1 (satu).

Demikian juga dengan jumlah bobot seluruh variabel yang tercakup dalam faktor yang sama (level kedua hirarki pemeringkatan) harus berjumlah 1 (satu).

Hal yang sama juga berlaku untuk bobot indikator-indikator dalam satu variabel yang sama (level ketiga hirarki pemeringkatan) juga harus berjumlah 1 (satu).

Terakhir, bobot intensitas-intensitas dalam tiap

*As discussed in the body of this research report particularly in part III.B.3.1.3., indicators were determined and developed through study of literature, experts' choice, and KPPOD's research result in 2001. The result was conferred with several experts through panel judgement then producing the final indicators and their structure.*

*Afterwards, the structure of indicators produced by experts through panel judgment as explained in part III.B.3.1. was then valued (the level of the importance of each indicator) to measure the level of attractiveness of an area to investment, as presented in appendix 9.1*

*The hierarchy of values of factors, variables, and indicators in appendix 9.1 illustrates the five significant factors determining the attractiveness of an area to investment and the weight assigned to each. The total weight of all factors (the first level in the hierarchy) is 1 (one).*

*Likewise the total weight of all variables under similar factor (the second level in the hierarchy) is 1 (one).*

*The same process applies for the value of indicators under one variable (the third level in the hierarchy) wherein the total weight is 1 (one).*

*The total weight for the intensity assigned to each*



indikator yang sama (level keempat hirarki pemeringkatan) juga berjumlah 1 (satu).

Bila kita melihat pada turunan selanjutnya dibawah level intensitas (untuk memudahkan, sebut saja level kelima); maka kita akan melihat bahwa **score intensitas (bukan bobot intensitas)** yang terlihat pada level kelima, contoh untuk **indikator birokrasi** dengan intensitas **KASBS** (singkatan dari Kelembagaan – Aparat – Birokrasi – Sangat Baik) adalah **0.0248**. Jumlah keseluruhan score intensitas tertinggi untuk setiap indikator dari 42 (empat puluh dua) indikator pemeringkatan adalah 1 (satu).

Dengan mengambil contoh **indikator birokrasi** di atas, score intensitas tersebut dapat dijelaskan sebagai berikut:

1. Score **0.0248** adalah score intensitas KASBS dimana untuk indikator '**Birokrasi**' yang dinilai '**sangat baik**' akan menghasilkan score 0.0248. Sedangkan bila untuk indikator yang sama dinilai '**sangat jelek**' KASBJ (singkatan dari Kelembagaan – Aparat – Birokrasi – Sangat Jelek) maka menghasilkan score **0.0016**.
2. Score **0.0248** tersebut didapat dari perkalian antar bobot:  
intensitas x indikator x variabel x faktor  
 $0.513 \times 0.673 \times 0.226 \times 0.318 = 0.0248$
3. Pada *Lampiran 10.A* score **0.0062** pada indikator '**Birokrasi**' dari Kota Jambi yang dinilai '**sedang**' dengan notasi KASBD (singkatan dari Kelembagaan – Aparat – Birokrasi – Sedang), didapat dari perkalian antar bobot:

$$\text{intensitas} \times \text{indikator} \times \text{variabel} \times \text{faktor} \\ 0.126 \times 0.673 \times 0.226 \times 0.318 = 0.0062$$

(Catatan: perbedaan digit hanya karena faktor pembulatan)

Penghitungan dengan cara yang sama juga dilakukan pada intensitas dari indikator-indikator lainnya untuk menghasilkan score intensitas tiap indikator pemeringkatan.

*indicator (the fourth level in the hierarchy) was likewise set at one.*

*Looking at the next level, below the intensity level (to make it simple, just call it the fifth level), we will find intensity score (not intensity weight) in the fifth level. For example, under government service indicator there is KASBS intensity (abbreviation of Institutional – Apparatus – Bureaucracy – Excellent), with a score of 0.0248. The total of the entire intensity values for each indicator from 42 (forty-two) indicators is 1 (one).*

*Using the above government service indicator as sample, the score of its intensity is calculated as follows:*

1. The score **0.0248** is KASBS intensity score where "**Government Service**" indicator, which is valued '**excellent**', produces a score of 0.0248. While, if similar indicator, KASBJ (abbreviation of Institutional – Apparatus – Bureaucracy – Extremely Bad), is valued '**extremely bad**', it produces a score of **0.0016**.
2. The score **0.0248** is obtained by multiplying the weights for the following:  
*intensity x indicator x variable x factor*  
 $0.513 \times 0.673 \times 0.226 \times 0.318 = 0.0248$
3. In Appendix 10.A, the score **0.0062** given to '**Government Service**' indicator for Jambi City equivalent to '**Moderate**' rating under KASBD (which stands for Institutional Factor – Apparatus – Bureaucracy – Moderate), was obtained by multiplying the weights of the following:  
*intensity x indicator x variable x factor*  
 $0.126 \times 0.673 \times 0.226 \times 0.318 = 0.0062$

*(Note: the product was rounded off)*

*The same calculation was done for the intensity of other indicators to produce intensity score of each indicator.*

Jumlah kumulatif score intensitas dari ke 42 (empat puluh dua) indikator pemeringkatan menghasilkan score total, yang kemudian dibandingkan antar daerah untuk mendapatkan hasil urutan peringkat total. Bila suatu daerah mendapatkan score intensitas tertinggi untuk tiap indikator dari semua 42 (empat puluh dua) indikator pemeringkatan, maka score totalnya harus 1 (satu).

Untuk peringkat per kategori maka score intensitas yang dijumlahkan berdasarkan intensitas intensitas dari kategori spesifik yang dimaksud. Misalnya peringkat score Kelembagaan merupakan perbandingan score kumulatif dari indikator indikator yang masuk pada faktor Kelembagaan saja.

*The total cumulative intensity score of 42 (forty-two) indicators represents the total score, which is used in the comparison between one area to other areas to get the ranking of total score. An area that obtained the highest intensity score for all 42 (forty-two) indicators was given a total score of 1 (one).*

*Ranking per specific factor was done through calculation of the intensity score of intended factor. For example, the ranking in terms of institutional factor was conducted by comparing the cumulative score of indicators under the institutional factor.*

**INTENSITAS INDIKATOR DATA PRIMER/Intensity of Primary Indicators**  
**Lampiran 10.A : Intensitas Indikator Faktor Kelembagaan 53 Kota/**  
*The Intensity of 53 Cities of the Institutional Indicators*

| NO | PROPINSI  | KOTA             | FAKTOR KELEMBAGAAN   |                         |                  |                       |                 |                       |                             |
|----|-----------|------------------|----------------------|-------------------------|------------------|-----------------------|-----------------|-----------------------|-----------------------------|
|    |           |                  | Aparatur & Pelayanan |                         | Peraturan Daerah | Kepastian Hukum       |                 |                       |                             |
|    |           |                  | Birokrasi            | Penyalahgunaan Wewenang |                  | Konsistensi Peraturan | Penegakan Hukum | Pungli Luar Birokrasi | Hub. Eksekutif - Legislatif |
|    |           |                  | 0.0483               | 0.0235                  | 0.0771           | 0.035                 | 0.0524          | 0.0194                | 0.0167                      |
| 1  | Bali      | Denpasar         | 0.0031               | 0.0061                  | <b>0.0046</b>    | 0.0054                | 0.0034          | 0.0051                | 0.0030                      |
| 2  | Babel     | Pangkal Pinang   | 0.0031               | 0.0015                  | <b>0.0147</b>    | 0.0054                | 0.0034          | 0.0006                | 0.0030                      |
| 3  | Banten    | Cilegon          | 0.0126               | 0.0120                  | <b>0.0046</b>    | 0.0165                | 0.0151          | 0.0025                | 0.0072                      |
| 4  | Banten    | Tangerang        | 0.0031               | 0.0030                  | <b>0.0046</b>    | 0.0054                | 0.0070          | 0.0012                | 0.0030                      |
| 5  | Bengkulu  | Bengkulu         | 0.0031               | 0.0008                  | <b>0.0147</b>    | 0.0024                | 0.0070          | 0.0025                | 0.0030                      |
| 6  | DIY       | Yogyakarta       | 0.0062               | 0.0030                  | <b>0.0147</b>    | 0.0054                | 0.0070          | 0.0012                | 0.0030                      |
| 7  | DKI       | Jakarta          | 0.0031               | 0.0030                  | <b>0.0147</b>    | 0.0054                | 0.0034          | 0.0006                | 0.0030                      |
| 8  | Gorontalo | Gorontalo        | 0.0126               | 0.0120                  | <b>0.0147</b>    | 0.0165                | 0.0151          | 0.0099                | 0.0030                      |
| 9  | Jambi     | Jambi            | 0.0062               | 0.0061                  | <b>0.0147</b>    | 0.0054                | 0.0070          | 0.0051                | 0.0030                      |
| 10 | Jabar     | Bandung          | 0.0016               | 0.0008                  | <b>0.0147</b>    | 0.0024                | 0.0034          | 0.0006                | 0.0007                      |
| 11 | Jabar     | Bekasi           | 0.0031               | 0.0030                  | <b>0.0147</b>    | 0.0054                | 0.0070          | 0.0012                | 0.0030                      |
| 12 | Jabar     | Bogor            | 0.0062               | 0.0120                  | <b>0.0046</b>    | 0.0024                | 0.0070          | 0.0025                | 0.0030                      |
| 13 | Jabar     | Cirebon          | 0.0031               | 0.0030                  | <b>0.0147</b>    | 0.0054                | 0.0034          | 0.0012                | 0.0007                      |
| 14 | Jabar     | Sukabumi         | 0.0062               | 0.0015                  | <b>0.0147</b>    | 0.0054                | 0.0070          | 0.0006                | 0.0030                      |
| 15 | Jateng    | Pekalongan       | 0.0062               | 0.0030                  | <b>0.0147</b>    | 0.0054                | 0.0070          | 0.0025                | 0.0007                      |
| 16 | Jateng    | Semarang         | 0.0062               | 0.0061                  | <b>0.0147</b>    | 0.0054                | 0.0070          | 0.0025                | 0.0030                      |
| 17 | Jateng    | Surakarta        | 0.0031               | 0.0030                  | <b>0.0217</b>    | 0.0024                | 0.0018          | 0.0051                | 0.0030                      |
| 18 | Jateng    | Tegal            | 0.0126               | 0.0061                  | <b>0.0046</b>    | 0.0165                | 0.0151          | 0.0051                | 0.0072                      |
| 19 | Jatim     | Kediri           | 0.0126               | 0.0120                  | <b>0.0147</b>    | 0.0165                | 0.0151          | 0.0051                | 0.0030                      |
| 20 | Jatim     | Madiun           | 0.0126               | 0.0061                  | <b>0.0147</b>    | 0.0095                | 0.0151          | 0.0025                | 0.0030                      |
| 21 | Jatim     | Malang           | 0.0062               | 0.0030                  | <b>0.0147</b>    | 0.0165                | 0.0151          | 0.0051                | 0.0030                      |
| 22 | Jatim     | Mojokerto        | 0.0062               | 0.0120                  | <b>0.0147</b>    | 0.0095                | 0.0151          | 0.0099                | 0.0030                      |
| 23 | Jatim     | Probolinggo      | 0.0062               | 0.0015                  | <b>0.0147</b>    | 0.0165                | 0.0151          | 0.0006                | 0.0030                      |
| 24 | Jatim     | Surabaya         | 0.0062               | 0.0008                  | <b>0.0147</b>    | 0.0054                | 0.0070          | 0.0012                | 0.0048                      |
| 25 | Kalbar    | Pontianak        | 0.0062               | 0.0030                  | <b>0.0147</b>    | 0.0095                | 0.0151          | 0.0006                | 0.0030                      |
| 26 | Kalsel    | Banjarmasin      | 0.0062               | 0.0030                  | <b>0.0147</b>    | 0.0054                | 0.0070          | 0.0025                | 0.0030                      |
| 27 | Kalteng   | Palangkaraya     | 0.0016               | 0.0008                  | <b>0.0147</b>    | 0.0054                | 0.0034          | 0.0025                | 0.0030                      |
| 28 | Kaltim    | Balikpapan       | 0.0062               | 0.0030                  | <b>0.0147</b>    | 0.0095                | 0.0151          | 0.0051                | 0.0030                      |
| 29 | Kaltim    | Samarinda        | 0.0016               | 0.0008                  | <b>0.0147</b>    | 0.0024                | 0.0018          | 0.0006                | 0.0030                      |
| 30 | Lampung   | Bandar Lampung   | 0.0031               | 0.0030                  | <b>0.0147</b>    | 0.0054                | 0.0070          | 0.0025                | 0.0030                      |
| 31 | NTB       | Mataram          | 0.0062               | 0.0030                  | <b>0.0046</b>    | 0.0054                | 0.0070          | 0.0025                | 0.0015                      |
| 32 | NTT       | Kupang           | 0.0016               | 0.0061                  | <b>0.0147</b>    | 0.0165                | 0.0151          | 0.0025                | 0.0030                      |
| 33 | Papua     | Jayapura         | 0.0062               | 0.0030                  | <b>0.0147</b>    | 0.0012                | 0.0018          | 0.0025                | 0.0030                      |
| 34 | Papua     | Sorong           | 0.0016               | 0.0008                  | <b>0.0147</b>    | 0.0012                | 0.0151          | 0.0006                | 0.0007                      |
| 35 | Riau      | Batam            | 0.0016               | 0.0030                  | <b>0.0147</b>    | 0.0012                | 0.0018          | 0.0006                | 0.0030                      |
| 36 | Riau      | Dumai            | 0.0062               | 0.0030                  | <b>0.0147</b>    | 0.0165                | 0.0151          | 0.0012                | 0.0072                      |
| 37 | Riau      | Pekanbaru        | 0.0062               | 0.0030                  | <b>0.0147</b>    | 0.0054                | 0.0070          | 0.0012                | 0.0030                      |
| 38 | Riau      | Tanjung Pinang   | 0.0016               | 0.0008                  | <b>0.0046</b>    | 0.0024                | 0.0018          | 0.0006                | 0.0007                      |
| 39 | Sulsel    | Makassar         | 0.0126               | 0.0120                  | <b>0.0147</b>    | 0.0054                | 0.0070          | 0.0051                | 0.0030                      |
| 40 | Sulsel    | Pare-Pare        | 0.0126               | 0.0120                  | <b>0.0147</b>    | 0.0165                | 0.0151          | 0.0051                | 0.0030                      |
| 41 | Sulteng   | Palu             | 0.0031               | 0.0008                  | <b>0.0147</b>    | 0.0024                | 0.0070          | 0.0012                | 0.0030                      |
| 42 | Sultra    | Kendari          | 0.0062               | 0.0015                  | <b>0.0147</b>    | 0.0054                | 0.0151          | 0.0025                | 0.0030                      |
| 43 | Sulut     | Bitung           | 0.0016               | 0.0015                  | <b>0.0147</b>    | 0.0054                | 0.0070          | 0.0012                | 0.0015                      |
| 44 | Sulut     | Manado           | 0.0016               | 0.0015                  | <b>0.0046</b>    | 0.0024                | 0.0070          | 0.0025                | 0.0015                      |
| 45 | Sumbar    | Padang           | 0.0062               | 0.0030                  | <b>0.0147</b>    | 0.0024                | 0.0070          | 0.0006                | 0.0015                      |
| 46 | Sumbar    | Sawahlunto       | 0.0248               | 0.0120                  | <b>0.0147</b>    | 0.0054                | 0.0070          | 0.0099                | 0.0043                      |
| 47 | Sumsel    | Palembang        | 0.0031               | 0.0008                  | <b>0.0147</b>    | 0.0024                | 0.0018          | 0.0006                | 0.0030                      |
| 48 | Sumut     | Binjai           | 0.0031               | 0.0030                  | <b>0.0147</b>    | 0.0095                | 0.0070          | 0.0006                | 0.0030                      |
| 49 | Sumut     | Medan            | 0.0031               | 0.0015                  | <b>0.0046</b>    | 0.0165                | 0.0070          | 0.0006                | 0.0030                      |
| 50 | Sumut     | Pematang Siantar | 0.0062               | 0.0030                  | <b>0.0147</b>    | 0.0095                | 0.0070          | 0.0012                | 0.0030                      |
| 51 | Sumut     | Sibolga          | 0.0031               | 0.0061                  | <b>0.0046</b>    | 0.0054                | 0.0070          | 0.0006                | 0.0030                      |
| 52 | Sumut     | Tanjung Balai    | 0.0031               | 0.0030                  | <b>0.0147</b>    | 0.0165                | 0.0151          | 0.0025                | 0.0030                      |
| 53 | Sumut     | Tebing Tinggi    | 0.0062               | 0.0030                  | <b>0.0046</b>    | 0.0165                | 0.0070          | 0.0051                | 0.0043                      |

**Lampiran 10.B : Intensitas Indikator Faktor Kelembagaan 161 Kabupaten/**  
*The Intensity of 161 Regencies of the Institutional Indicators*

| NO | PROPINSI  | KABUPATEN            | FAKTOR KELEMBAGAAN   |                         |                  |                  |                      |                       |                   |                       |                               |
|----|-----------|----------------------|----------------------|-------------------------|------------------|------------------|----------------------|-----------------------|-------------------|-----------------------|-------------------------------|
|    |           |                      | Aparatur & Pelayanan |                         | Peraturan Daerah | Keuangan Daerah  |                      | Kepastian Hukum       |                   |                       |                               |
|    |           |                      |                      |                         |                  |                  |                      |                       |                   |                       |                               |
|    |           |                      | Birokrasi            | Penyalahgunaan Wewenang |                  | Retribusi/ Pajak | Anggaran Pemb./ APBD | Konsistensi Peraturan | Pener-gakan Hukum | Pungli Luar Birokrasi | Hubungan Eksekutif Legislatif |
|    |           |                      | 0.0483               | 0.0235                  | 0.0771           | 0.0316           | 0.0141               | 0.035                 | 0.0524            | 0.0194                | 0.0167                        |
| 1  | Bali      | Badung               | 0.0062               | 0.0061                  | 0.0147           | 0.0132           | 0.0059               | 0.0054                | 0.0070            | 0.0051                | 0.0030                        |
| 2  | Bali      | Bangli               | 0.0062               | 0.0061                  | 0.0147           | 0.0031           | 0.0023               | 0.0024                | 0.0070            | 0.0051                | 0.0030                        |
| 3  | Bali      | Buleleng             | 0.0062               | 0.0030                  | 0.0147           | 0.0083           | 0.0009               | 0.0054                | 0.0034            | 0.0051                | 0.0015                        |
| 4  | Bali      | Gianyar              | 0.0126               | 0.0120                  | 0.0147           | 0.0132           | 0.0037               | 0.0054                | 0.0070            | 0.0099                | 0.0030                        |
| 5  | Bali      | Jembrana             | 0.0126               | 0.0061                  | 0.0046           | 0.0031           | 0.0009               | 0.0054                | 0.0070            | 0.0051                | 0.0030                        |
| 6  | Bali      | Karangasem           | 0.0126               | 0.0061                  | 0.0046           | 0.0132           | 0.0023               | 0.0095                | 0.0151            | 0.0051                | 0.0030                        |
| 7  | Bali      | Klungkung            | 0.0126               | 0.0120                  | 0.0147           | 0.0051           | 0.0023               | 0.0054                | 0.0070            | 0.0099                | 0.0030                        |
| 8  | Bali      | Tabanan              | 0.0062               | 0.0030                  | 0.0147           | 0.0083           | 0.0023               | 0.0054                | 0.0070            | 0.0051                | 0.0030                        |
| 9  | Babel     | Bangka               | 0.0062               | 0.0015                  | 0.0046           | 0.0083           | 0.0037               | 0.0054                | 0.0034            | 0.0025                | 0.0030                        |
| 10 | Babel     | Belitung             | 0.0062               | 0.0061                  | 0.0046           | 0.0132           | 0.0014               | 0.0054                | 0.0034            | 0.0051                | 0.0030                        |
| 11 | Banten    | Lebak                | 0.0126               | 0.0030                  | 0.0147           | 0.0020           | 0.0023               | 0.0095                | 0.0151            | 0.0025                | 0.0030                        |
| 12 | Banten    | Serang               | 0.0062               | 0.0030                  | 0.0147           | 0.0051           | 0.0014               | 0.0054                | 0.0151            | 0.0025                | 0.0030                        |
| 13 | Banten    | Tangerang            | 0.0016               | 0.0008                  | 0.0147           | 0.0083           | 0.0023               | 0.0054                | 0.0034            | 0.0012                | 0.0015                        |
| 14 | Bengkulu  | Bengkulu Selatan     | 0.0016               | 0.0008                  | 0.0147           | 0.0051           | 0.0009               | 0.0012                | 0.0034            | 0.0025                | 0.0007                        |
| 15 | Bengkulu  | Bengkulu Utara       | 0.0126               | 0.0030                  | 0.0147           | 0.0051           | 0.0014               | 0.0054                | 0.0034            | 0.0025                | 0.0030                        |
| 16 | Bengkulu  | Rejang Lebong        | 0.0248               | 0.0061                  | 0.0147           | 0.0031           | 0.0014               | 0.0054                | 0.0151            | 0.0025                | 0.0030                        |
| 17 | DIY       | Bantul               | 0.0062               | 0.0030                  | 0.0147           | 0.0031           | 0.0009               | 0.0095                | 0.0151            | 0.0025                | 0.0030                        |
| 18 | DIY       | Gunung Kidul         | 0.0126               | 0.0061                  | 0.0147           | 0.0020           | 0.0014               | 0.0095                | 0.0070            | 0.0099                | 0.0030                        |
| 19 | Gorontalo | Gorontalo            | 0.0062               | 0.0061                  | 0.0147           | 0.0020           | 0.0014               | 0.0095                | 0.0151            | 0.0051                | 0.0030                        |
| 20 | Jambi     | Batanghari           | 0.0062               | 0.0061                  | 0.0217           | 0.0020           | 0.0037               | 0.0054                | 0.0151            | 0.0051                | 0.0030                        |
| 21 | Jambi     | Bungo                | 0.0126               | 0.0120                  | 0.0147           | 0.0020           | 0.0023               | 0.0095                | 0.0151            | 0.0099                | 0.0030                        |
| 22 | Jambi     | Kerinci              | 0.0062               | 0.0061                  | 0.0147           | 0.0051           | 0.0023               | 0.0054                | 0.0251            | 0.0025                | 0.0030                        |
| 23 | Jambi     | Tanjung Jabung Timur | 0.0031               | 0.0120                  | 0.0147           | 0.0031           | 0.0037               | 0.0054                | 0.0151            | 0.0099                | 0.0043                        |
| 24 | Jambi     | Tebo                 | 0.0062               | 0.0008                  | 0.0147           | 0.0020           | 0.0059               | 0.0054                | 0.0070            | 0.0051                | 0.0030                        |
| 25 | Jabar     | Bandung              | 0.0062               | 0.0030                  | 0.0147           | 0.0083           | 0.0023               | 0.0095                | 0.0151            | 0.0025                | 0.0030                        |
| 26 | Jabar     | Bekasi               | 0.0126               | 0.0120                  | 0.0147           | 0.0083           | 0.0037               | 0.0054                | 0.0070            | 0.0025                | 0.0030                        |
| 27 | Jabar     | Bogor                | 0.0062               | 0.0120                  | 0.0046           | 0.0083           | 0.0023               | 0.0095                | 0.0151            | 0.0099                | 0.0030                        |
| 28 | Jabar     | Ciamis               | 0.0016               | 0.0015                  | 0.0046           | 0.0020           | 0.0009               | 0.0054                | 0.0034            | 0.0025                | 0.0030                        |
| 29 | Jabar     | Cianjur              | 0.0126               | 0.0030                  | 0.0147           | 0.0051           | 0.0023               | 0.0054                | 0.0151            | 0.0025                | 0.0030                        |
| 30 | Jabar     | Cirebon              | 0.0126               | 0.0030                  | 0.0046           | 0.0083           | 0.0023               | 0.0054                | 0.0151            | 0.0025                | 0.0030                        |
| 31 | Jabar     | Garut                | 0.0062               | 0.0061                  | 0.0147           | 0.0031           | 0.0009               | 0.0095                | 0.0151            | 0.0025                | 0.0030                        |
| 32 | Jabar     | Indramayu            | 0.0126               | 0.0120                  | 0.0147           | 0.0083           | 0.0023               | 0.0165                | 0.0251            | 0.0025                | 0.0030                        |
| 33 | Jabar     | Karawang             | 0.0126               | 0.0061                  | 0.0147           | 0.0051           | 0.0037               | 0.0165                | 0.0151            | 0.0006                | 0.0030                        |
| 34 | Jabar     | Kuningan             | 0.0031               | 0.0030                  | 0.0147           | 0.0020           | 0.0009               | 0.0165                | 0.0251            | 0.0025                | 0.0030                        |
| 35 | Jabar     | Purwakarta           | 0.0126               | 0.0120                  | 0.0147           | 0.0083           | 0.0014               | 0.0165                | 0.0151            | 0.0051                | 0.0043                        |
| 36 | Jabar     | Subang               | 0.0031               | 0.0061                  | 0.0147           | 0.0031           | 0.0014               | 0.0054                | 0.0070            | 0.0025                | 0.0030                        |
| 37 | Jabar     | Sukabumi             | 0.0031               | 0.0061                  | 0.0147           | 0.0083           | 0.0023               | 0.0024                | 0.0070            | 0.0099                | 0.0043                        |
| 38 | Jabar     | Sumedang             | 0.0126               | 0.0120                  | 0.0046           | 0.0051           | 0.0009               | 0.0165                | 0.0151            | 0.0025                | 0.0030                        |
| 39 | Jabar     | Tasikmalaya          | 0.0062               | 0.0120                  | 0.0147           | 0.0031           | 0.0009               | 0.0165                | 0.0151            | 0.0099                | 0.0030                        |
| 40 | Jateng    | Banyumas             | 0.0062               | 0.0120                  | 0.0147           | 0.0031           | 0.0009               | 0.0054                | 0.0151            | 0.0025                | 0.0030                        |
| 41 | Jateng    | Boyolali             | 0.0062               | 0.0030                  | 0.0147           | 0.0020           | 0.0009               | 0.0054                | 0.0070            | 0.0025                | 0.0030                        |
| 42 | Jateng    | Cilacap              | 0.0126               | 0.0061                  | 0.0147           | 0.0083           | 0.0014               | 0.0054                | 0.0151            | 0.0012                | 0.0043                        |
| 43 | Jateng    | Jepara               | 0.0062               | 0.0030                  | 0.0147           | 0.0031           | 0.0023               | 0.0054                | 0.0070            | 0.0006                | 0.0030                        |
| 44 | Jateng    | Karanganyar          | 0.0062               | 0.0120                  | 0.0147           | 0.0051           | 0.0009               | 0.0054                | 0.0070            | 0.0051                | 0.0030                        |
| 45 | Jateng    | Kebumen              | 0.0062               | 0.0030                  | 0.0147           | 0.0031           | 0.0014               | 0.0054                | 0.0151            | 0.0025                | 0.0030                        |
| 46 | Jateng    | Kendal               | 0.0062               | 0.0030                  | 0.0147           | 0.0051           | 0.0009               | 0.0054                | 0.0070            | 0.0025                | 0.0030                        |
| 47 | Jateng    | Klaten               | 0.0031               | 0.0030                  | 0.0147           | 0.0083           | 0.0009               | 0.0024                | 0.0034            | 0.0025                | 0.0030                        |
| 48 | Jateng    | Kudus                | 0.0126               | 0.0120                  | 0.0046           | 0.0031           | 0.0023               | 0.0165                | 0.0151            | 0.0051                | 0.0030                        |
| 49 | Jateng    | Magelang             | 0.0062               | 0.0030                  | 0.0147           | 0.0083           | 0.0023               | 0.0165                | 0.0151            | 0.0051                | 0.0030                        |
| 50 | Jateng    | Pekalongan           | 0.0062               | 0.0120                  | 0.0147           | 0.0051           | 0.0014               | 0.0095                | 0.0151            | 0.0025                | 0.0030                        |
| 51 | Jateng    | Pemalang             | 0.0062               | 0.0015                  | 0.0147           | 0.0031           | 0.0009               | 0.0095                | 0.0251            | 0.0006                | 0.0030                        |
| 52 | Jateng    | Sukoharjo            | 0.0062               | 0.0030                  | 0.0147           | 0.0083           | 0.0009               | 0.0054                | 0.0034            | 0.0051                | 0.0030                        |
| 53 | Jateng    | Tegal                | 0.0062               | 0.0015                  | 0.0147           | 0.0031           | 0.0023               | 0.0054                | 0.0151            | 0.0006                | 0.0030                        |
| 54 | Jateng    | Wonosobo             | 0.0126               | 0.0061                  | 0.0147           | 0.0020           | 0.0014               | 0.0054                | 0.0070            | 0.0025                | 0.0030                        |

| NO  | PROPINSI | KABUPATEN            | FAKTOR KELEMBAGAAN   |                         |                  |                  |                      |                       |                   |                       |                               |
|-----|----------|----------------------|----------------------|-------------------------|------------------|------------------|----------------------|-----------------------|-------------------|-----------------------|-------------------------------|
|     |          |                      | Aparatur & Pelayanan |                         | Peraturan Daerah | Keuangan Daerah  |                      | Kepastian Hukum       |                   |                       |                               |
|     |          |                      | Brokrasi             | Penyalahgunaan Wewenang |                  | Retribusi/ Pajak | Anggaran Pemb./ APBD | Konsistensi Peraturan | Penera-gaan Hukum | Pungli Luar Birokrasi | Hubungan Ekeku-tif Legislatif |
|     |          |                      |                      |                         |                  |                  |                      |                       |                   |                       |                               |
| 55  | Jatim    | Bangkalan            | 0.0062               | 0.0030                  | 0.0147           | 0.0031           | 0.0014               | 0.0095                | 0.0070            | 0.0051                | 0.0030                        |
| 56  | Jatim    | Banyuwangi           | 0.0031               | 0.0030                  | 0.0147           | 0.0051           | 0.0014               | 0.0054                | 0.0070            | 0.0025                | 0.0030                        |
| 57  | Jatim    | Blitar               | 0.0062               | 0.0120                  | 0.0046           | 0.0051           | 0.0009               | 0.0165                | 0.0070            | 0.0025                | 0.0030                        |
| 58  | Jatim    | Bondowoso            | 0.0062               | 0.0061                  | 0.0046           | 0.0051           | 0.0009               | 0.0095                | 0.0151            | 0.0051                | 0.0030                        |
| 59  | Jatim    | Gresik               | 0.0062               | 0.0030                  | 0.0147           | 0.0132           | 0.0014               | 0.0054                | 0.0070            | 0.0025                | 0.0043                        |
| 60  | Jatim    | Jember               | 0.0016               | 0.0030                  | 0.0147           | 0.0031           | 0.0023               | 0.0024                | 0.0034            | 0.0025                | 0.0030                        |
| 61  | Jatim    | Jombang              | 0.0126               | 0.0008                  | 0.0147           | 0.0051           | 0.0023               | 0.0165                | 0.0151            | 0.0025                | 0.0030                        |
| 62  | Jatim    | Kediri               | 0.0031               | 0.0030                  | 0.0147           | 0.0051           | 0.0014               | 0.0054                | 0.0070            | 0.0051                | 0.0030                        |
| 63  | Jatim    | Lamongan             | 0.0126               | 0.0030                  | 0.0046           | 0.0051           | 0.0014               | 0.0054                | 0.0151            | 0.0051                | 0.0072                        |
| 64  | Jatim    | Magetan              | 0.0062               | 0.0030                  | 0.0147           | 0.0051           | 0.0014               | 0.0095                | 0.0151            | 0.0051                | 0.0030                        |
| 65  | Jatim    | Mojokerto            | 0.0126               | 0.0061                  | 0.0046           | 0.0083           | 0.0023               | 0.0095                | 0.0151            | 0.0025                | 0.0030                        |
| 66  | Jatim    | Pamekasan            | 0.0126               | 0.0030                  | 0.0046           | 0.0031           | 0.0014               | 0.0165                | 0.0151            | 0.0025                | 0.0030                        |
| 67  | Jatim    | Pasuruan             | 0.0062               | 0.0030                  | 0.0147           | 0.0132           | 0.0023               | 0.0054                | 0.0151            | 0.0012                | 0.0030                        |
| 68  | Jatim    | Ponorogo             | 0.0062               | 0.0061                  | 0.0147           | 0.0051           | 0.0014               | 0.0024                | 0.0034            | 0.0051                | 0.0030                        |
| 69  | Jatim    | Sidoarjo             | 0.0126               | 0.0030                  | 0.0147           | 0.0051           | 0.0023               | 0.0054                | 0.0034            | 0.0025                | 0.0072                        |
| 70  | Jatim    | Situbondo            | 0.0016               | 0.0061                  | 0.0046           | 0.0083           | 0.0023               | 0.0054                | 0.0070            | 0.0025                | 0.0030                        |
| 71  | Jatim    | Tulungagung          | 0.0031               | 0.0030                  | 0.0147           | 0.0051           | 0.0014               | 0.0095                | 0.0151            | 0.0025                | 0.0030                        |
| 72  | Kalbar   | Kapuas Hulu          | 0.0062               | 0.0015                  | 0.0046           | 0.0020           | 0.0037               | 0.0024                | 0.0070            | 0.0006                | 0.0030                        |
| 73  | Kalbar   | Ketapang             | 0.0031               | 0.0030                  | 0.0147           | 0.0051           | 0.0059               | 0.0054                | 0.0151            | 0.0012                | 0.0030                        |
| 74  | Kalbar   | Pontianak            | 0.0031               | 0.0030                  | 0.0046           | 0.0132           | 0.0014               | 0.0054                | 0.0070            | 0.0006                | 0.0030                        |
| 75  | Kalbar   | Sambas               | 0.0062               | 0.0030                  | 0.0147           | 0.0031           | 0.0023               | 0.0165                | 0.0151            | 0.0025                | 0.0030                        |
| 76  | Kalbar   | Sanggau              | 0.0062               | 0.0030                  | 0.0147           | 0.0051           | 0.0023               | 0.0054                | 0.0070            | 0.0012                | 0.0030                        |
| 77  | Kalsel   | Hulu Sungai Selatan  | 0.0126               | 0.0120                  | 0.0147           | 0.0020           | 0.0023               | 0.0095                | 0.0151            | 0.0051                | 0.0030                        |
| 78  | Kalsel   | Hulu Sungai Tengah   | 0.0126               | 0.0061                  | 0.0046           | 0.0051           | 0.0023               | 0.0095                | 0.0151            | 0.0051                | 0.0030                        |
| 79  | Kalsel   | Hulu Sungai Utara    | 0.0126               | 0.0061                  | 0.0147           | 0.0051           | 0.0023               | 0.0054                | 0.0070            | 0.0051                | 0.0030                        |
| 80  | Kalsel   | Tabalong             | 0.0126               | 0.0030                  | 0.0147           | 0.0132           | 0.0023               | 0.0095                | 0.0151            | 0.0051                | 0.0030                        |
| 81  | Kalsel   | Tanah Laut           | 0.0062               | 0.0061                  | 0.0046           | 0.0051           | 0.0023               | 0.0165                | 0.0070            | 0.0099                | 0.0030                        |
| 82  | Kalsel   | Tapin                | 0.0062               | 0.0030                  | 0.0147           | 0.0083           | 0.0014               | 0.0054                | 0.0034            | 0.0099                | 0.0030                        |
| 83  | Kalteng  | Barito Selatan       | 0.0062               | 0.0030                  | 0.0046           | 0.0051           | 0.0059               | 0.0095                | 0.0070            | 0.0025                | 0.0030                        |
| 84  | Kalteng  | Barito Utara         | 0.0126               | 0.0061                  | 0.0147           | 0.0051           | 0.0059               | 0.0095                | 0.0151            | 0.0099                | 0.0072                        |
| 85  | Kalteng  | Kapuas               | 0.0016               | 0.0015                  | 0.0147           | 0.0051           | 0.0023               | 0.0054                | 0.0151            | 0.0025                | 0.0030                        |
| 86  | Kaltim   | Berau                | 0.0062               | 0.0015                  | 0.0147           | 0.0083           | 0.0059               | 0.0024                | 0.0018            | 0.0006                | 0.0030                        |
| 87  | Kaltim   | Bulungan             | 0.0126               | 0.0061                  | 0.0147           | 0.0051           | 0.0059               | 0.0054                | 0.0151            | 0.0025                | 0.0030                        |
| 88  | Kaltim   | Kutai                | 0.0126               | 0.0030                  | 0.0147           | 0.0083           | 0.0059               | 0.0054                | 0.0070            | 0.0025                | 0.0030                        |
| 89  | Kaltim   | Kutai Timur          | 0.0062               | 0.0061                  | 0.0147           | 0.0083           | 0.0059               | 0.0054                | 0.0070            | 0.0025                | 0.0030                        |
| 90  | Kaltim   | Nunukan              | 0.0126               | 0.0061                  | 0.0046           | 0.0051           | 0.0059               | 0.0095                | 0.0251            | 0.0025                | 0.0030                        |
| 91  | Kaltim   | Pasir                | 0.0126               | 0.0008                  | 0.0046           | 0.0083           | 0.0059               | 0.0095                | 0.0070            | 0.0025                | 0.0030                        |
| 92  | Lampung  | Lampung Barat        | 0.0126               | 0.0061                  | 0.0147           | 0.0083           | 0.0037               | 0.0165                | 0.0151            | 0.0025                | 0.0072                        |
| 93  | Lampung  | Lampung Selatan      | 0.0016               | 0.0030                  | 0.0046           | 0.0051           | 0.0014               | 0.0024                | 0.0070            | 0.0025                | 0.0030                        |
| 94  | Lampung  | Lampung Timur        | 0.0062               | 0.0061                  | 0.0147           | 0.0051           | 0.0009               | 0.0054                | 0.0070            | 0.0051                | 0.0030                        |
| 95  | Lampung  | Lampung Utara        | 0.0016               | 0.0120                  | 0.0147           | 0.0051           | 0.0023               | 0.0012                | 0.0034            | 0.0051                | 0.0030                        |
| 96  | Lampung  | Way Kanan            | 0.0126               | 0.0120                  | 0.0147           | 0.0051           | 0.0059               | 0.0165                | 0.0151            | 0.0099                | 0.0030                        |
| 97  | NTB      | Bima                 | 0.0126               | 0.0061                  | 0.0046           | 0.0083           | 0.0014               | 0.0165                | 0.0151            | 0.0025                | 0.0030                        |
| 98  | NTB      | Dompu                | 0.0126               | 0.0030                  | 0.0046           | 0.0051           | 0.0023               | 0.0054                | 0.0070            | 0.0025                | 0.0015                        |
| 99  | NTB      | Lombok Barat         | 0.0062               | 0.0120                  | 0.0147           | 0.0132           | 0.0014               | 0.0054                | 0.0070            | 0.0099                | 0.0015                        |
| 100 | NTB      | Lombok Timur         | 0.0062               | 0.0030                  | 0.0147           | 0.0020           | 0.0023               | 0.0054                | 0.0070            | 0.0025                | 0.0030                        |
| 101 | NTT      | Belu                 | 0.0126               | 0.0120                  | 0.0147           | 0.0083           | 0.0023               | 0.0165                | 0.0151            | 0.0051                | 0.0030                        |
| 102 | NTT      | Ende                 | 0.0062               | 0.0061                  | 0.0147           | 0.0031           | 0.0014               | 0.0165                | 0.0251            | 0.0025                | 0.0030                        |
| 103 | NTT      | Flores Timur         | 0.0062               | 0.0030                  | 0.0147           | 0.0051           | 0.0023               | 0.0095                | 0.0151            | 0.0025                | 0.0015                        |
| 104 | NTT      | Manggarai            | 0.0126               | 0.0015                  | 0.0046           | 0.0031           | 0.0023               | 0.0054                | 0.0070            | 0.0025                | 0.0072                        |
| 105 | NTT      | Ngada                | 0.0062               | 0.0030                  | 0.0147           | 0.0020           | 0.0023               | 0.0024                | 0.0034            | 0.0025                | 0.0030                        |
| 106 | NTT      | Sumba Barat          | 0.0126               | 0.0030                  | 0.0147           | 0.0031           | 0.0023               | 0.0165                | 0.0034            | 0.0012                | 0.0030                        |
| 107 | NTT      | Timur Tengah Selatan | 0.0062               | 0.0030                  | 0.0147           | 0.0031           | 0.0037               | 0.0054                | 0.0070            | 0.0025                | 0.0030                        |
| 108 | NTT      | Timur Tengah Utara   | 0.0126               | 0.0120                  | 0.0147           | 0.0031           | 0.0037               | 0.0095                | 0.0151            | 0.0099                | 0.0030                        |

| NO     | PROPINSI | KABUPATEN             | FAKTOR KELEMBAGAAN   |                         |                  |                  |                      |                       |                   |                       |                             |
|--------|----------|-----------------------|----------------------|-------------------------|------------------|------------------|----------------------|-----------------------|-------------------|-----------------------|-----------------------------|
|        |          |                       | Aparatur & Pelayanan |                         | Peraturan Daerah | Keuangan Daerah  |                      | Kepastian Hukum       |                   |                       |                             |
|        |          |                       | Brokrasi             | Penyalahgunaan Wewenang |                  | Retribusi/ Pajak | Anggaran Pemb./ APBD | Konsistensi Peraturan | Pener-gakan Hukum | Pungli Luar Birokrasi | Hubungan Ekektuf Legislatif |
|        |          |                       |                      |                         |                  |                  |                      |                       |                   |                       |                             |
| 0.0483 | 0.0235   | 0.0771                | 0.0316               | 0.0141                  | 0.035            | 0.0524           | 0.0194               | 0.0167                |                   |                       |                             |
| 109    | Papua    | Fak-Fak               | 0.0062               | 0.0030                  | 0.0046           | 0.0083           | 0.0023               | 0.0012                | 0.0070            | 0.0025                | 0.0007                      |
| 110    | Papua    | Jayawijaya            | 0.0016               | 0.0061                  | 0.0147           | 0.0051           | 0.0037               | 0.0012                | 0.0070            | 0.0025                | 0.0030                      |
| 111    | Papua    | Manokwari             | 0.0062               | 0.0120                  | 0.0046           | 0.0051           | 0.0059               | 0.0054                | 0.0151            | 0.0051                | 0.0030                      |
| 112    | Papua    | Mimika                | 0.0031               | 0.0030                  | 0.0046           | 0.0132           | 0.0037               | 0.0012                | 0.0018            | 0.0025                | 0.0030                      |
| 113    | Papua    | Sorong                | 0.0062               | 0.0008                  | 0.0147           | 0.0020           | 0.0023               | 0.0012                | 0.0034            | 0.0006                | 0.0007                      |
| 114    | Riau     | Bengkalis             | 0.0016               | 0.0008                  | 0.0147           | 0.0132           | 0.0059               | 0.0024                | 0.0034            | 0.0025                | 0.0030                      |
| 115    | Riau     | Indragiri Hilir       | 0.0031               | 0.0015                  | 0.0147           | 0.0020           | 0.0059               | 0.0054                | 0.0070            | 0.0006                | 0.0030                      |
| 116    | Riau     | Kampar                | 0.0126               | 0.0030                  | 0.0147           | 0.0051           | 0.0059               | 0.0095                | 0.0151            | 0.0025                | 0.0015                      |
| 117    | Riau     | Kuantan Singingi      | 0.0062               | 0.0015                  | 0.0147           | 0.0020           | 0.0059               | 0.0054                | 0.0070            | 0.0012                | 0.0043                      |
| 118    | Riau     | Pelalawan             | 0.0126               | 0.0030                  | 0.0046           | 0.0132           | 0.0059               | 0.0165                | 0.0251            | 0.0051                | 0.0030                      |
| 119    | Riau     | Rokan Hulu            | 0.0062               | 0.0061                  | 0.0046           | 0.0020           | 0.0059               | 0.0054                | 0.0070            | 0.0051                | 0.0030                      |
| 120    | Sulsel   | Bantaeng              | 0.0062               | 0.0120                  | 0.0147           | 0.0031           | 0.0037               | 0.0054                | 0.0151            | 0.0051                | 0.0030                      |
| 121    | Sulsel   | Barru                 | 0.0062               | 0.0120                  | 0.0147           | 0.0051           | 0.0037               | 0.0165                | 0.0070            | 0.0051                | 0.0030                      |
| 122    | Sulsel   | Bone                  | 0.0126               | 0.0061                  | 0.0217           | 0.0020           | 0.0009               | 0.0095                | 0.0151            | 0.0025                | 0.0030                      |
| 123    | Sulsel   | Enrekang              | 0.0031               | 0.0061                  | 0.0147           | 0.0051           | 0.0023               | 0.0054                | 0.0070            | 0.0051                | 0.0030                      |
| 124    | Sulsel   | Gowa                  | 0.0126               | 0.0120                  | 0.0147           | 0.0083           | 0.0023               | 0.0165                | 0.0151            | 0.0099                | 0.0043                      |
| 125    | Sulsel   | Jeneponto             | 0.0126               | 0.0120                  | 0.0147           | 0.0031           | 0.0023               | 0.0095                | 0.0151            | 0.0051                | 0.0030                      |
| 126    | Sulsel   | Luwu                  | 0.0126               | 0.0120                  | 0.0147           | 0.0020           | 0.0023               | 0.0054                | 0.0151            | 0.0051                | 0.0030                      |
| 127    | Sulsel   | Luwu Utara            | 0.0126               | 0.0061                  | 0.0147           | 0.0132           | 0.0023               | 0.0165                | 0.0151            | 0.0025                | 0.0072                      |
| 128    | Sulsel   | Majene                | 0.0126               | 0.0030                  | 0.0147           | 0.0051           | 0.0023               | 0.0165                | 0.0151            | 0.0051                | 0.0030                      |
| 129    | Sulsel   | Maros                 | 0.0062               | 0.0030                  | 0.0046           | 0.0083           | 0.0023               | 0.0054                | 0.0070            | 0.0025                | 0.0030                      |
| 130    | Sulsel   | Pangkep               | 0.0062               | 0.0030                  | 0.0046           | 0.0132           | 0.0037               | 0.0054                | 0.0070            | 0.0051                | 0.0030                      |
| 131    | Sulsel   | Pinrang               | 0.0126               | 0.0120                  | 0.0147           | 0.0051           | 0.0023               | 0.0165                | 0.0151            | 0.0099                | 0.0072                      |
| 132    | Sulsel   | Selayar               | 0.0062               | 0.0120                  | 0.0147           | 0.0051           | 0.0037               | 0.0095                | 0.0151            | 0.0051                | 0.0030                      |
| 133    | Sulsel   | Sinjai                | 0.0126               | 0.0120                  | 0.0147           | 0.0020           | 0.0023               | 0.0095                | 0.0251            | 0.0051                | 0.0072                      |
| 134    | Sulsel   | Takalar               | 0.0016               | 0.0008                  | 0.0217           | 0.0031           | 0.0014               | 0.0054                | 0.0070            | 0.0012                | 0.0030                      |
| 135    | Sulsel   | Tana Toraja           | 0.0062               | 0.0030                  | 0.0147           | 0.0051           | 0.0023               | 0.0054                | 0.0070            | 0.0051                | 0.0030                      |
| 136    | Sulteng  | Banggai               | 0.0126               | 0.0120                  | 0.0147           | 0.0051           | 0.0023               | 0.0165                | 0.0151            | 0.0099                | 0.0030                      |
| 137    | Sulteng  | Donggala              | 0.0031               | 0.0030                  | 0.0147           | 0.0083           | 0.0009               | 0.0054                | 0.0034            | 0.0099                | 0.0030                      |
| 138    | Sulteng  | Morowali              | 0.0062               | 0.0008                  | 0.0147           | 0.0031           | 0.0037               | 0.0054                | 0.0034            | 0.0025                | 0.0030                      |
| 139    | Sulteng  | Poso                  | 0.0126               | 0.0030                  | 0.0147           | 0.0031           | 0.0023               | 0.0095                | 0.0151            | 0.0025                | 0.0030                      |
| 140    | Sulteng  | Toli-Toli             | 0.0126               | 0.0015                  | 0.0147           | 0.0132           | 0.0023               | 0.0054                | 0.0151            | 0.0099                | 0.0048                      |
| 141    | Sultra   | Buton                 | 0.0126               | 0.0061                  | 0.0147           | 0.0020           | 0.0023               | 0.0054                | 0.0151            | 0.0025                | 0.0030                      |
| 142    | Sultra   | Kolaka                | 0.0126               | 0.0030                  | 0.0046           | 0.0083           | 0.0023               | 0.0165                | 0.0251            | 0.0025                | 0.0043                      |
| 143    | Sulut    | Minahasa              | 0.0031               | 0.0008                  | 0.0046           | 0.0051           | 0.0009               | 0.0054                | 0.0034            | 0.0006                | 0.0015                      |
| 144    | Sulut    | Sangihe               | 0.0031               | 0.0030                  | 0.0046           | 0.0020           | 0.0009               | 0.0095                | 0.0251            | 0.0025                | 0.0030                      |
| 145    | Sumbar   | Pasaman               | 0.0031               | 0.0061                  | 0.0046           | 0.0031           | 0.0037               | 0.0024                | 0.0070            | 0.0051                | 0.0030                      |
| 146    | Sumbar   | Pesisir Selatan       | 0.0062               | 0.0030                  | 0.0147           | 0.0020           | 0.0014               | 0.0024                | 0.0034            | 0.0099                | 0.0030                      |
| 147    | Sumbar   | Sawah Lunto Sijunjung | 0.0062               | 0.0030                  | 0.0147           | 0.0051           | 0.0023               | 0.0054                | 0.0070            | 0.0025                | 0.0030                      |
| 148    | Sumbar   | Solok                 | 0.0248               | 0.0120                  | 0.0147           | 0.0051           | 0.0023               | 0.0054                | 0.0070            | 0.0051                | 0.0030                      |
| 149    | Sumsel   | Lahat                 | 0.0031               | 0.0030                  | 0.0147           | 0.0051           | 0.0014               | 0.0054                | 0.0070            | 0.0051                | 0.0030                      |
| 150    | Sumsel   | Muara Enim            | 0.0126               | 0.0030                  | 0.0147           | 0.0132           | 0.0023               | 0.0054                | 0.0070            | 0.0012                | 0.0030                      |
| 151    | Sumsel   | Musi Banyuasin        | 0.0062               | 0.0061                  | 0.0217           | 0.0132           | 0.0059               | 0.0095                | 0.0151            | 0.0025                | 0.0072                      |
| 152    | Sumsel   | Musi Rawas            | 0.0016               | 0.0008                  | 0.0046           | 0.0031           | 0.0059               | 0.0012                | 0.0018            | 0.0006                | 0.0015                      |
| 153    | Sumsel   | Ogan Kemiling Ilir    | 0.0016               | 0.0015                  | 0.0147           | 0.0051           | 0.0037               | 0.0024                | 0.0034            | 0.0006                | 0.0030                      |
| 154    | Sumut    | Asahan                | 0.0062               | 0.0120                  | 0.0147           | 0.0132           | 0.0023               | 0.0165                | 0.0151            | 0.0012                | 0.0043                      |
| 155    | Sumut    | Dairi                 | 0.0126               | 0.0120                  | 0.0147           | 0.0031           | 0.0023               | 0.0095                | 0.0070            | 0.0025                | 0.0030                      |
| 156    | Sumut    | Deli Serdang          | 0.0126               | 0.0030                  | 0.0046           | 0.0083           | 0.0014               | 0.0054                | 0.0070            | 0.0006                | 0.0030                      |
| 157    | Sumut    | Labuhan Batu          | 0.0062               | 0.0061                  | 0.0046           | 0.0083           | 0.0023               | 0.0165                | 0.0070            | 0.0012                | 0.0030                      |
| 158    | Sumut    | Langkat               | 0.0062               | 0.0061                  | 0.0147           | 0.0051           | 0.0023               | 0.0054                | 0.0070            | 0.0025                | 0.0030                      |
| 159    | Sumut    | Simalungun            | 0.0031               | 0.0030                  | 0.0147           | 0.0083           | 0.0023               | 0.0095                | 0.0151            | 0.0025                | 0.0072                      |
| 160    | Sumut    | Tanah Karo            | 0.0031               | 0.0030                  | 0.0147           | 0.0051           | 0.0014               | 0.0054                | 0.0070            | 0.0012                | 0.0030                      |
| 161    | Sumut    | Tapanuli Utara        | 0.0062               | 0.0030                  | 0.0147           | 0.0020           | 0.0023               | 0.0095                | 0.0151            | 0.0099                | 0.0072                      |

**Lampiran 11.A : Intensitas Indikator Faktor Sosial Politik 53 Kota/**  
*The Intensity of 53 Cities of Socio-Political Indicators*

| NO | PROPINSI  | KOTA             | FAKTOR SOSIAL POLITIK |                     |                  |                        |                    |                    |            |         |                   |               |            |
|----|-----------|------------------|-----------------------|---------------------|------------------|------------------------|--------------------|--------------------|------------|---------|-------------------|---------------|------------|
|    |           |                  | Keamanan              |                     |                  | Sosial Politik         |                    |                    |            | Budaya  |                   |               |            |
|    |           |                  | Gangguan Usaha        | Gangguan Masyarakat | Kecepatan Aparat | Partisipasi Masyarakat | Konflik Masyarakat | Stabilitas Politik | Unjuk Rasa | Terbuka | Non Diskriminatif | Adat-istiadat | Etos Kerja |
|    |           |                  | 0.0523                | 0.0311              | 0.0724           | 0.012                  | 0.0184             | 0.0289             | 0.0095     | 0.0086  | 0.0064            | 0.0071        | 0.0141     |
| 1  | Bali      | Denpasar         | 0.0062                | 0.0036              | 0.0102           | 0.0023                 | 0.0095             | 0.0116             | 0.0049     | 0.0003  | 0.0004            | 0.0012        | 0.0019     |
| 2  | Babel     | Pangkal Pinang   | 0.0062                | 0.0036              | 0.0214           | 0.0030                 | 0.0095             | 0.0116             | 0.0049     | 0.0041  | 0.0009            | 0.0005        | 0.0009     |
| 3  | Banten    | Cilegon          | 0.0153                | 0.0080              | 0.0102           | 0.0030                 | 0.0095             | 0.0094             | 0.0049     | 0.0025  | 0.0031            | 0.0032        | 0.0040     |
| 4  | Banten    | Tangerang        | 0.0020                | 0.0012              | 0.0048           | 0.0023                 | 0.0095             | 0.0116             | 0.0049     | 0.0006  | 0.0004            | 0.0005        | 0.0009     |
| 5  | Bengkulu  | Bengkulu         | 0.0034                | 0.0012              | 0.0025           | 0.0030                 | 0.0095             | 0.0116             | 0.0049     | 0.0003  | 0.0004            | 0.0005        | 0.0009     |
| 6  | DIY       | Yogyakarta       | 0.0062                | 0.0036              | 0.0102           | 0.0030                 | 0.0095             | 0.0116             | 0.0049     | 0.0012  | 0.0018            | 0.0032        | 0.0019     |
| 7  | DKI       | Jakarta          | 0.0020                | 0.0012              | 0.0102           | 0.0037                 | 0.0095             | 0.0116             | 0.0025     | 0.0025  | 0.0031            | 0.0003        | 0.0067     |
| 8  | Gorontalo | Gorontalo        | 0.0062                | 0.0036              | 0.0214           | 0.0037                 | 0.0095             | 0.0116             | 0.0049     | 0.0025  | 0.0031            | 0.0032        | 0.0040     |
| 9  | Jambi     | Jambi            | 0.0062                | 0.0036              | 0.0214           | 0.0030                 | 0.0095             | 0.0116             | 0.0049     | 0.0012  | 0.0004            | 0.0020        | 0.0009     |
| 10 | Jabar     | Bandung          | 0.0020                | 0.0012              | 0.0048           | 0.0030                 | 0.0095             | 0.0116             | 0.0025     | 0.0006  | 0.0018            | 0.0012        | 0.0019     |
| 11 | Jabar     | Bekasi           | 0.0020                | 0.0012              | 0.0102           | 0.0030                 | 0.0095             | 0.0116             | 0.0049     | 0.0003  | 0.0004            | 0.0012        | 0.0009     |
| 12 | Jabar     | Bogor            | 0.0062                | 0.0036              | 0.0214           | 0.0037                 | 0.0024             | 0.0048             | 0.0003     | 0.0012  | 0.0018            | 0.0020        | 0.0019     |
| 13 | Jabar     | Cirebon          | 0.0034                | 0.0012              | 0.0048           | 0.0030                 | 0.0095             | 0.0116             | 0.0049     | 0.0006  | 0.0002            | 0.0005        | 0.0005     |
| 14 | Jabar     | Sukabumi         | 0.0034                | 0.0012              | 0.0025           | 0.0030                 | 0.0095             | 0.0116             | 0.0049     | 0.0012  | 0.0009            | 0.0012        | 0.0019     |
| 15 | Jateng    | Pekalongan       | 0.0062                | 0.0080              | 0.0102           | 0.0037                 | 0.0095             | 0.0094             | 0.0049     | 0.0025  | 0.0018            | 0.0012        | 0.0067     |
| 16 | Jateng    | Semarang         | 0.0034                | 0.0036              | 0.0102           | 0.0037                 | 0.0095             | 0.0116             | 0.0049     | 0.0012  | 0.0009            | 0.0012        | 0.0019     |
| 17 | Jateng    | Surakarta        | 0.0062                | 0.0036              | 0.0102           | 0.0030                 | 0.0095             | 0.0048             | 0.0025     | 0.0003  | 0.0004            | 0.0012        | 0.0019     |
| 18 | Jateng    | Tegal            | 0.0153                | 0.0080              | 0.0102           | 0.0030                 | 0.0095             | 0.0116             | 0.0049     | 0.0025  | 0.0018            | 0.0020        | 0.0067     |
| 19 | Jatim     | Kediri           | 0.0034                | 0.0021              | 0.0214           | 0.0023                 | 0.0095             | 0.0116             | 0.0049     | 0.0012  | 0.0009            | 0.0032        | 0.0040     |
| 20 | Jatim     | Madiun           | 0.0062                | 0.0036              | 0.0214           | 0.0023                 | 0.0095             | 0.0116             | 0.0049     | 0.0041  | 0.0004            | 0.0003        | 0.0040     |
| 21 | Jatim     | Malang           | 0.0153                | 0.0036              | 0.0102           | 0.0030                 | 0.0095             | 0.0116             | 0.0049     | 0.0012  | 0.0031            | 0.0032        | 0.0019     |
| 22 | Jatim     | Mojokerto        | 0.0254                | 0.0036              | 0.0102           | 0.0030                 | 0.0095             | 0.0116             | 0.0049     | 0.0041  | 0.0031            | 0.0032        | 0.0040     |
| 23 | Jatim     | Probolinggo      | 0.0062                | 0.0012              | 0.0048           | 0.0030                 | 0.0095             | 0.0116             | 0.0049     | 0.0012  | 0.0018            | 0.0012        | 0.0040     |
| 24 | Jatim     | Surabaya         | 0.0062                | 0.0021              | 0.0102           | 0.0023                 | 0.0024             | 0.0116             | 0.0012     | 0.0012  | 0.0009            | 0.0020        | 0.0019     |
| 25 | Kalbar    | Pontianak        | 0.0020                | 0.0021              | 0.0214           | 0.0030                 | 0.0095             | 0.0116             | 0.0049     | 0.0012  | 0.0018            | 0.0020        | 0.0019     |
| 26 | Kalsel    | Banjarmasin      | 0.0062                | 0.0036              | 0.0102           | 0.0030                 | 0.0095             | 0.0116             | 0.0049     | 0.0003  | 0.0002            | 0.0012        | 0.0019     |
| 27 | Kalteng   | Palangkaraya     | 0.0034                | 0.0012              | 0.0048           | 0.0023                 | 0.0095             | 0.0116             | 0.0049     | 0.0012  | 0.0009            | 0.0003        | 0.0019     |
| 28 | Kaltim    | Balikpapan       | 0.0153                | 0.0080              | 0.0102           | 0.0037                 | 0.0095             | 0.0094             | 0.0025     | 0.0025  | 0.0018            | 0.0020        | 0.0019     |
| 29 | Kaltim    | Samarinda        | 0.0020                | 0.0012              | 0.0102           | 0.0037                 | 0.0095             | 0.0094             | 0.0012     | 0.0003  | 0.0002            | 0.0012        | 0.0009     |
| 30 | Lampung   | Bandar Lampung   | 0.0062                | 0.0036              | 0.0048           | 0.0030                 | 0.0095             | 0.0116             | 0.0049     | 0.0012  | 0.0009            | 0.0012        | 0.0040     |
| 31 | NTB       | Mataram          | 0.0153                | 0.0080              | 0.0048           | 0.0030                 | 0.0095             | 0.0094             | 0.0049     | 0.0025  | 0.0018            | 0.0012        | 0.0019     |
| 32 | NTT       | Kupang           | 0.0062                | 0.0036              | 0.0048           | 0.0030                 | 0.0095             | 0.0094             | 0.0025     | 0.0012  | 0.0009            | 0.0020        | 0.0019     |
| 33 | Papua     | Jayapura         | 0.0034                | 0.0012              | 0.0095           | 0.0017                 | 0.0095             | 0.0116             | 0.0025     | 0.0003  | 0.0002            | 0.0003        | 0.0009     |
| 34 | Papua     | Sorong           | 0.0062                | 0.0036              | 0.0095           | 0.0037                 | 0.0024             | 0.0094             | 0.0012     | 0.0006  | 0.0002            | 0.0003        | 0.0005     |
| 35 | Riau      | Batam            | 0.0062                | 0.0036              | 0.0102           | 0.0023                 | 0.0024             | 0.0094             | 0.0025     | 0.0025  | 0.0009            | 0.0012        | 0.0067     |
| 36 | Riau      | Dumai            | 0.0062                | 0.0021              | 0.0102           | 0.0037                 | 0.0095             | 0.0116             | 0.0049     | 0.0012  | 0.0009            | 0.0012        | 0.0040     |
| 37 | Riau      | Pekanbaru        | 0.0062                | 0.0036              | 0.0102           | 0.0037                 | 0.0095             | 0.0094             | 0.0049     | 0.0012  | 0.0004            | 0.0012        | 0.0009     |
| 38 | Riau      | Tanjung Pinang   | 0.0034                | 0.0021              | 0.0214           | 0.0030                 | 0.0095             | 0.0116             | 0.0049     | 0.0012  | 0.0018            | 0.0032        | 0.0040     |
| 39 | Sulsel    | Makasar          | 0.0062                | 0.0036              | 0.0102           | 0.0023                 | 0.0095             | 0.0116             | 0.0025     | 0.0025  | 0.0018            | 0.0032        | 0.0067     |
| 40 | Sulsel    | Pare-Pare        | 0.0254                | 0.0080              | 0.0102           | 0.0023                 | 0.0095             | 0.0116             | 0.0049     | 0.0003  | 0.0031            | 0.0032        | 0.0040     |
| 41 | Sulteng   | Palu             | 0.0062                | 0.0012              | 0.0025           | 0.0030                 | 0.0048             | 0.0116             | 0.0049     | 0.0006  | 0.0002            | 0.0003        | 0.0009     |
| 42 | Sultra    | Kendari          | 0.0062                | 0.0021              | 0.0025           | 0.0030                 | 0.0095             | 0.0116             | 0.0025     | 0.0012  | 0.0004            | 0.0012        | 0.0019     |
| 43 | Sulut     | Bitung           | 0.0034                | 0.0036              | 0.0102           | 0.0030                 | 0.0095             | 0.0116             | 0.0049     | 0.0025  | 0.0018            | 0.0005        | 0.0019     |
| 44 | Sulut     | Manado           | 0.0062                | 0.0036              | 0.0102           | 0.0030                 | 0.0095             | 0.0116             | 0.0049     | 0.0041  | 0.0031            | 0.0032        | 0.0067     |
| 45 | Sumbar    | Padang           | 0.0062                | 0.0021              | 0.0102           | 0.0030                 | 0.0095             | 0.0116             | 0.0049     | 0.0012  | 0.0009            | 0.0020        | 0.0019     |
| 46 | Sumbar    | Sawahlunto       | 0.0062                | 0.0080              | 0.0214           | 0.0037                 | 0.0095             | 0.0116             | 0.0049     | 0.0012  | 0.0018            | 0.0012        | 0.0019     |
| 47 | Sumsel    | Palembang        | 0.0062                | 0.0021              | 0.0048           | 0.0030                 | 0.0095             | 0.0116             | 0.0049     | 0.0025  | 0.0018            | 0.0032        | 0.0040     |
| 48 | Sumut     | Binjai           | 0.0020                | 0.0021              | 0.0102           | 0.0037                 | 0.0095             | 0.0116             | 0.0049     | 0.0012  | 0.0009            | 0.0020        | 0.0009     |
| 49 | Sumut     | Medan            | 0.0062                | 0.0036              | 0.0214           | 0.0023                 | 0.0095             | 0.0116             | 0.0049     | 0.0012  | 0.0009            | 0.0012        | 0.0019     |
| 50 | Sumut     | Pematang Siantar | 0.0020                | 0.0012              | 0.0102           | 0.0023                 | 0.0095             | 0.0116             | 0.0049     | 0.0012  | 0.0009            | 0.0005        | 0.0005     |
| 51 | Sumut     | Sibolga          | 0.0020                | 0.0012              | 0.0102           | 0.0023                 | 0.0095             | 0.0116             | 0.0049     | 0.0003  | 0.0002            | 0.0012        | 0.0009     |
| 52 | Sumut     | Tanjung Balai    | 0.0153                | 0.0080              | 0.0102           | 0.0023                 | 0.0095             | 0.0116             | 0.0049     | 0.0025  | 0.0009            | 0.0005        | 0.0009     |
| 53 | Sumut     | Tebing Tinggi    | 0.0153                | 0.0080              | 0.0102           | 0.0030                 | 0.0095             | 0.0094             | 0.0049     | 0.0025  | 0.0018            | 0.0032        | 0.0040     |

**Lampiran 11.B : Intensitas Indikator Faktor Sosial Politik 161 Kabupaten**  
*The Intensity of 161 Regencies of Socio-Political Indicators*

| NO | PROPINSI  | KABUPATEN            | FAKTOR SOSIAL POLITIK |                     |                  |                        |                    |                    |            |         |                   |               |            |
|----|-----------|----------------------|-----------------------|---------------------|------------------|------------------------|--------------------|--------------------|------------|---------|-------------------|---------------|------------|
|    |           |                      | Keamanan              |                     |                  | Sosial Politik         |                    |                    |            | Budaya  |                   |               |            |
|    |           |                      | Gangguan Usaha        | Gangguan Masyarakat | Kecepatan Aparat | Partisipasi Masyarakat | Konflik Masyarakat | Stabilitas Politik | Unjuk Rasa | Terbuka | Non Diskriminatif | Adat-istiadat | Etos Kerja |
|    |           |                      | 0.0523                | 0.0311              | 0.0724           | 0.012                  | 0.0184             | 0.0289             | 0.0095     | 0.0086  | 0.0064            | 0.0071        | 0.0141     |
| 1  | Bali      | Badung               | 0.0153                | 0.0036              | 0.0102           | 0.0030                 | 0.0095             | 0.0116             | 0.0049     | 0.0012  | 0.0018            | 0.0020        | 0.0019     |
| 2  | Bali      | Bangli               | 0.0153                | 0.0080              | 0.0214           | 0.0030                 | 0.0095             | 0.0116             | 0.0049     | 0.0025  | 0.0018            | 0.0012        | 0.0019     |
| 3  | Bali      | Buleleng             | 0.0153                | 0.0080              | 0.0102           | 0.0030                 | 0.0095             | 0.0116             | 0.0049     | 0.0025  | 0.0009            | 0.0012        | 0.0019     |
| 4  | Bali      | Gianyar              | 0.0254                | 0.0080              | 0.0102           | 0.0030                 | 0.0095             | 0.0116             | 0.0049     | 0.0012  | 0.0018            | 0.0020        | 0.0019     |
| 5  | Bali      | Jembrana             | 0.0153                | 0.0080              | 0.0102           | 0.0030                 | 0.0095             | 0.0116             | 0.0049     | 0.0012  | 0.0009            | 0.0012        | 0.0019     |
| 6  | Bali      | Karangasem           | 0.0062                | 0.0021              | 0.0214           | 0.0030                 | 0.0095             | 0.0116             | 0.0049     | 0.0025  | 0.0018            | 0.0012        | 0.0019     |
| 7  | Bali      | Klungkung            | 0.0153                | 0.0163              | 0.0102           | 0.0030                 | 0.0095             | 0.0116             | 0.0049     | 0.0025  | 0.0009            | 0.0012        | 0.0019     |
| 8  | Bali      | Tabanan              | 0.0062                | 0.0036              | 0.0048           | 0.0030                 | 0.0095             | 0.0116             | 0.0049     | 0.0025  | 0.0004            | 0.0003        | 0.0019     |
| 9  | Babel     | Bangka               | 0.0153                | 0.0080              | 0.0102           | 0.0023                 | 0.0095             | 0.0116             | 0.0049     | 0.0041  | 0.0031            | 0.0005        | 0.0009     |
| 10 | Babel     | Belitung             | 0.0153                | 0.0036              | 0.0102           | 0.0030                 | 0.0095             | 0.0116             | 0.0049     | 0.0012  | 0.0009            | 0.0020        | 0.0019     |
| 11 | Banten    | Lebak                | 0.0062                | 0.0036              | 0.0102           | 0.0030                 | 0.0095             | 0.0116             | 0.0049     | 0.0012  | 0.0018            | 0.0012        | 0.0009     |
| 12 | Banten    | Serang               | 0.0062                | 0.0036              | 0.0102           | 0.0037                 | 0.0095             | 0.0116             | 0.0049     | 0.0003  | 0.0004            | 0.0003        | 0.0009     |
| 13 | Banten    | Tangerang            | 0.0062                | 0.0012              | 0.0025           | 0.0037                 | 0.0095             | 0.0116             | 0.0049     | 0.0012  | 0.0009            | 0.0012        | 0.0019     |
| 14 | Bengkulu  | Bengkulu Selatan     | 0.0062                | 0.0036              | 0.0025           | 0.0030                 | 0.0095             | 0.0116             | 0.0049     | 0.0025  | 0.0004            | 0.0012        | 0.0040     |
| 15 | Bengkulu  | Bengkulu Utara       | 0.0153                | 0.0036              | 0.0102           | 0.0030                 | 0.0095             | 0.0116             | 0.0049     | 0.0025  | 0.0031            | 0.0032        | 0.0019     |
| 16 | Bengkulu  | Rejang Lebong        | 0.0034                | 0.0036              | 0.0025           | 0.0030                 | 0.0095             | 0.0116             | 0.0049     | 0.0012  | 0.0009            | 0.0012        | 0.0019     |
| 17 | DIY       | Bantul               | 0.0062                | 0.0036              | 0.0102           | 0.0030                 | 0.0095             | 0.0116             | 0.0049     | 0.0025  | 0.0009            | 0.0020        | 0.0019     |
| 18 | DIY       | Gunung Kidul         | 0.0153                | 0.0080              | 0.0102           | 0.0023                 | 0.0095             | 0.0116             | 0.0049     | 0.0025  | 0.0031            | 0.0012        | 0.0040     |
| 19 | Gorontalo | Gorontalo            | 0.0062                | 0.0036              | 0.0214           | 0.0023                 | 0.0095             | 0.0116             | 0.0049     | 0.0025  | 0.0031            | 0.0032        | 0.0019     |
| 20 | Jambi     | Batanghari           | 0.0062                | 0.0036              | 0.0214           | 0.0030                 | 0.0095             | 0.0116             | 0.0049     | 0.0012  | 0.0004            | 0.0003        | 0.0009     |
| 21 | Jambi     | Bungo                | 0.0153                | 0.0036              | 0.0102           | 0.0030                 | 0.0095             | 0.0116             | 0.0049     | 0.0012  | 0.0018            | 0.0020        | 0.0019     |
| 22 | Jambi     | Kerinci              | 0.0062                | 0.0036              | 0.0102           | 0.0030                 | 0.0095             | 0.0116             | 0.0025     | 0.0006  | 0.0009            | 0.0012        | 0.0067     |
| 23 | Jambi     | Tanjung Jabung Timur | 0.0062                | 0.0080              | 0.0214           | 0.0037                 | 0.0095             | 0.0116             | 0.0049     | 0.0012  | 0.0004            | 0.0012        | 0.0019     |
| 24 | Jambi     | Tebo                 | 0.0254                | 0.0080              | 0.0102           | 0.0037                 | 0.0095             | 0.0116             | 0.0049     | 0.0012  | 0.0018            | 0.0012        | 0.0019     |
| 25 | Jabar     | Bandung              | 0.0062                | 0.0036              | 0.0102           | 0.0037                 | 0.0095             | 0.0116             | 0.0049     | 0.0012  | 0.0004            | 0.0012        | 0.0019     |
| 26 | Jabar     | Bekasi               | 0.0062                | 0.0036              | 0.0102           | 0.0037                 | 0.0095             | 0.0116             | 0.0049     | 0.0012  | 0.0009            | 0.0012        | 0.0019     |
| 27 | Jabar     | Bogor                | 0.0062                | 0.0036              | 0.0102           | 0.0030                 | 0.0095             | 0.0116             | 0.0049     | 0.0012  | 0.0004            | 0.0012        | 0.0019     |
| 28 | Jabar     | Ciamis               | 0.0153                | 0.0080              | 0.0214           | 0.0030                 | 0.0095             | 0.0116             | 0.0049     | 0.0012  | 0.0018            | 0.0012        | 0.0019     |
| 29 | Jabar     | Cianjur              | 0.0062                | 0.0036              | 0.0102           | 0.0030                 | 0.0095             | 0.0116             | 0.0049     | 0.0012  | 0.0018            | 0.0012        | 0.0019     |
| 30 | Jabar     | Cirebon              | 0.0153                | 0.0036              | 0.0102           | 0.0037                 | 0.0095             | 0.0116             | 0.0049     | 0.0025  | 0.0031            | 0.0020        | 0.0019     |
| 31 | Jabar     | Garut                | 0.0062                | 0.0036              | 0.0102           | 0.0030                 | 0.0095             | 0.0116             | 0.0049     | 0.0025  | 0.0018            | 0.0012        | 0.0040     |
| 32 | Jabar     | Indramayu            | 0.0153                | 0.0080              | 0.0214           | 0.0030                 | 0.0095             | 0.0116             | 0.0049     | 0.0012  | 0.0004            | 0.0012        | 0.0019     |
| 33 | Jabar     | Karawang             | 0.0153                | 0.0036              | 0.0102           | 0.0030                 | 0.0095             | 0.0116             | 0.0049     | 0.0041  | 0.0031            | 0.0020        | 0.0040     |
| 34 | Jabar     | Kuningan             | 0.0153                | 0.0080              | 0.0102           | 0.0030                 | 0.0095             | 0.0116             | 0.0049     | 0.0012  | 0.0018            | 0.0012        | 0.0019     |
| 35 | Jabar     | Purwakarta           | 0.0062                | 0.0080              | 0.0102           | 0.0030                 | 0.0095             | 0.0116             | 0.0049     | 0.0012  | 0.0018            | 0.0012        | 0.0019     |
| 36 | Jabar     | Subang               | 0.0153                | 0.0036              | 0.0102           | 0.0030                 | 0.0095             | 0.0116             | 0.0049     | 0.0025  | 0.0018            | 0.0012        | 0.0040     |
| 37 | Jabar     | Sukabumi             | 0.0062                | 0.0036              | 0.0025           | 0.0030                 | 0.0095             | 0.0116             | 0.0049     | 0.0003  | 0.0031            | 0.0032        | 0.0019     |
| 38 | Jabar     | Sumedang             | 0.0153                | 0.0080              | 0.0102           | 0.0030                 | 0.0095             | 0.0116             | 0.0049     | 0.0006  | 0.0009            | 0.0020        | 0.0040     |
| 39 | Jabar     | Tasikmalaya          | 0.0062                | 0.0036              | 0.0102           | 0.0030                 | 0.0095             | 0.0116             | 0.0049     | 0.0012  | 0.0009            | 0.0012        | 0.0019     |
| 40 | Jateng    | Banyumas             | 0.0062                | 0.0036              | 0.0102           | 0.0030                 | 0.0095             | 0.0116             | 0.0049     | 0.0012  | 0.0018            | 0.0012        | 0.0019     |
| 41 | Jateng    | Boyolali             | 0.0034                | 0.0021              | 0.0048           | 0.0030                 | 0.0095             | 0.0116             | 0.0049     | 0.0012  | 0.0018            | 0.0012        | 0.0019     |
| 42 | Jateng    | Cilacap              | 0.0034                | 0.0021              | 0.0102           | 0.0030                 | 0.0095             | 0.0116             | 0.0049     | 0.0012  | 0.0018            | 0.0012        | 0.0019     |
| 43 | Jateng    | Jepara               | 0.0062                | 0.0036              | 0.0102           | 0.0037                 | 0.0095             | 0.0116             | 0.0049     | 0.0012  | 0.0018            | 0.0020        | 0.0019     |
| 44 | Jateng    | Karanganyar          | 0.0020                | 0.0036              | 0.0102           | 0.0030                 | 0.0095             | 0.0116             | 0.0049     | 0.0012  | 0.0018            | 0.0012        | 0.0019     |
| 45 | Jateng    | Kebumen              | 0.0062                | 0.0036              | 0.0102           | 0.0030                 | 0.0095             | 0.0116             | 0.0049     | 0.0012  | 0.0018            | 0.0012        | 0.0019     |
| 46 | Jateng    | Kendal               | 0.0034                | 0.0036              | 0.0102           | 0.0037                 | 0.0095             | 0.0094             | 0.0049     | 0.0012  | 0.0018            | 0.0012        | 0.0019     |
| 47 | Jateng    | Klaten               | 0.0062                | 0.0036              | 0.0102           | 0.0030                 | 0.0095             | 0.0116             | 0.0049     | 0.0012  | 0.0018            | 0.0012        | 0.0019     |
| 48 | Jateng    | Kudus                | 0.0153                | 0.0080              | 0.0102           | 0.0023                 | 0.0095             | 0.0116             | 0.0025     | 0.0012  | 0.0018            | 0.0020        | 0.0040     |
| 49 | Jateng    | Magelang             | 0.0062                | 0.0036              | 0.0214           | 0.0030                 | 0.0095             | 0.0116             | 0.0049     | 0.0012  | 0.0018            | 0.0012        | 0.0040     |
| 50 | Jateng    | Pekalongan           | 0.0062                | 0.0080              | 0.0214           | 0.0023                 | 0.0095             | 0.0020             | 0.0049     | 0.0012  | 0.0018            | 0.0012        | 0.0019     |
| 51 | Jateng    | Pemalang             | 0.0034                | 0.0021              | 0.0102           | 0.0030                 | 0.0095             | 0.0116             | 0.0049     | 0.0012  | 0.0018            | 0.0020        | 0.0019     |
| 52 | Jateng    | Sukoharjo            | 0.0153                | 0.0080              | 0.0214           | 0.0030                 | 0.0095             | 0.0116             | 0.0049     | 0.0012  | 0.0018            | 0.0020        | 0.0040     |
| 53 | Jateng    | Tegal                | 0.0062                | 0.0021              | 0.0102           | 0.0030                 | 0.0095             | 0.0116             | 0.0049     | 0.0012  | 0.0018            | 0.0012        | 0.0019     |
| 54 | Jateng    | Wonosobo             | 0.0034                | 0.0021              | 0.0048           | 0.0030                 | 0.0095             | 0.0116             | 0.0049     | 0.0012  | 0.0018            | 0.0012        | 0.0019     |



| NO  | PROPINSI | KABUPATEN            | FAKTOR SOSIAL POLITIK |                     |                  |                        |                    |                    |            |         |                   |               |            |
|-----|----------|----------------------|-----------------------|---------------------|------------------|------------------------|--------------------|--------------------|------------|---------|-------------------|---------------|------------|
|     |          |                      | Keamanan              |                     |                  | Sosial Politik         |                    |                    |            | Budaya  |                   |               |            |
|     |          |                      | Gangguan Usaha        | Gangguan Masyarakat | Kecepatan Aparat | Partisipasi Masyarakat | Konflik Masyarakat | Stabilitas Politik | Unjuk Rasa | Terbuka | Non Diskriminatif | Adat-istiadat | Etos Kerja |
|     |          |                      | 0.0523                | 0.0311              | 0.0724           | 0.012                  | 0.0184             | 0.0289             | 0.0095     | 0.0086  | 0.0064            | 0.0071        | 0.0141     |
| 55  | Jatim    | Bangkalan            | 0.0034                | 0.0036              | 0.0102           | 0.0030                 | 0.0095             | 0.0116             | 0.0049     | 0.0025  | 0.0018            | 0.0020        | 0.0040     |
| 56  | Jatim    | Banyuwangi           | 0.0062                | 0.0036              | 0.0102           | 0.0030                 | 0.0095             | 0.0116             | 0.0049     | 0.0012  | 0.0018            | 0.0012        | 0.0019     |
| 57  | Jatim    | Blitar               | 0.0062                | 0.0036              | 0.0214           | 0.0023                 | 0.0095             | 0.0116             | 0.0049     | 0.0012  | 0.0004            | 0.0003        | 0.0019     |
| 58  | Jatim    | Bondowoso            | 0.0062                | 0.0080              | 0.0102           | 0.0030                 | 0.0095             | 0.0116             | 0.0049     | 0.0012  | 0.0018            | 0.0020        | 0.0019     |
| 59  | Jatim    | Gresik               | 0.0153                | 0.0036              | 0.0102           | 0.0030                 | 0.0095             | 0.0116             | 0.0049     | 0.0025  | 0.0018            | 0.0005        | 0.0019     |
| 60  | Jatim    | Jember               | 0.0034                | 0.0021              | 0.0048           | 0.0030                 | 0.0095             | 0.0116             | 0.0049     | 0.0012  | 0.0002            | 0.0005        | 0.0009     |
| 61  | Jatim    | Jombang              | 0.0062                | 0.0036              | 0.0102           | 0.0023                 | 0.0095             | 0.0116             | 0.0049     | 0.0025  | 0.0018            | 0.0032        | 0.0040     |
| 62  | Jatim    | Kediri               | 0.0062                | 0.0021              | 0.0214           | 0.0023                 | 0.0095             | 0.0116             | 0.0049     | 0.0006  | 0.0004            | 0.0012        | 0.0019     |
| 63  | Jatim    | Lamongan             | 0.0153                | 0.0036              | 0.0102           | 0.0030                 | 0.0095             | 0.0116             | 0.0049     | 0.0025  | 0.0031            | 0.0012        | 0.0040     |
| 64  | Jatim    | Magetan              | 0.0254                | 0.0080              | 0.0214           | 0.0023                 | 0.0095             | 0.0116             | 0.0049     | 0.0025  | 0.0031            | 0.0012        | 0.0009     |
| 65  | Jatim    | Mojokerto            | 0.0062                | 0.0021              | 0.0048           | 0.0023                 | 0.0095             | 0.0094             | 0.0012     | 0.0012  | 0.0031            | 0.0032        | 0.0040     |
| 66  | Jatim    | Pamekasan            | 0.0062                | 0.0036              | 0.0102           | 0.0023                 | 0.0095             | 0.0116             | 0.0049     | 0.0025  | 0.0031            | 0.0032        | 0.0040     |
| 67  | Jatim    | Pasuruan             | 0.0062                | 0.0036              | 0.0102           | 0.0023                 | 0.0095             | 0.0116             | 0.0025     | 0.0025  | 0.0031            | 0.0032        | 0.0040     |
| 68  | Jatim    | Ponorogo             | 0.0034                | 0.0036              | 0.0214           | 0.0023                 | 0.0095             | 0.0116             | 0.0049     | 0.0012  | 0.0004            | 0.0012        | 0.0009     |
| 69  | Jatim    | Sidoarjo             | 0.0062                | 0.0036              | 0.0102           | 0.0037                 | 0.0095             | 0.0116             | 0.0005     | 0.0012  | 0.0009            | 0.0012        | 0.0067     |
| 70  | Jatim    | Situbondo            | 0.0062                | 0.0036              | 0.0102           | 0.0030                 | 0.0095             | 0.0116             | 0.0049     | 0.0003  | 0.0002            | 0.0005        | 0.0019     |
| 71  | Jatim    | Tulungagung          | 0.0034                | 0.0021              | 0.0214           | 0.0030                 | 0.0095             | 0.0116             | 0.0049     | 0.0003  | 0.0004            | 0.0012        | 0.0040     |
| 72  | Kalbar   | Kapuas Hulu          | 0.0020                | 0.0012              | 0.0102           | 0.0037                 | 0.0048             | 0.0094             | 0.0005     | 0.0003  | 0.0002            | 0.0012        | 0.0009     |
| 73  | Kalbar   | Ketapang             | 0.0062                | 0.0012              | 0.0214           | 0.0030                 | 0.0095             | 0.0116             | 0.0049     | 0.0006  | 0.0009            | 0.0012        | 0.0005     |
| 74  | Kalbar   | Pontianak            | 0.0020                | 0.0012              | 0.0214           | 0.0030                 | 0.0095             | 0.0116             | 0.0025     | 0.0006  | 0.0002            | 0.0012        | 0.0009     |
| 75  | Kalbar   | Sambas               | 0.0020                | 0.0021              | 0.0214           | 0.0030                 | 0.0095             | 0.0116             | 0.0049     | 0.0025  | 0.0009            | 0.0032        | 0.0019     |
| 76  | Kalbar   | Sanggau              | 0.0020                | 0.0012              | 0.0214           | 0.0037                 | 0.0095             | 0.0116             | 0.0049     | 0.0012  | 0.0004            | 0.0020        | 0.0019     |
| 77  | Kalsel   | Hulu Sungai Selatan  | 0.0153                | 0.0036              | 0.0102           | 0.0030                 | 0.0095             | 0.0116             | 0.0049     | 0.0025  | 0.0018            | 0.0032        | 0.0040     |
| 78  | Kalsel   | Hulu Sungai Tengah   | 0.0153                | 0.0080              | 0.0102           | 0.0030                 | 0.0095             | 0.0116             | 0.0049     | 0.0012  | 0.0009            | 0.0012        | 0.0019     |
| 79  | Kalsel   | Hulu Sungai Utara    | 0.0062                | 0.0080              | 0.0102           | 0.0037                 | 0.0095             | 0.0116             | 0.0049     | 0.0025  | 0.0018            | 0.0012        | 0.0019     |
| 80  | Kalsel   | Tabalong             | 0.0062                | 0.0080              | 0.0214           | 0.0030                 | 0.0095             | 0.0116             | 0.0049     | 0.0003  | 0.0002            | 0.0003        | 0.0005     |
| 81  | Kalsel   | Tanah Laut           | 0.0062                | 0.0036              | 0.0102           | 0.0030                 | 0.0095             | 0.0116             | 0.0049     | 0.0012  | 0.0018            | 0.0012        | 0.0040     |
| 82  | Kalsel   | Tapin                | 0.0153                | 0.0080              | 0.0214           | 0.0037                 | 0.0095             | 0.0116             | 0.0049     | 0.0006  | 0.0018            | 0.0032        | 0.0019     |
| 83  | Kalteng  | Barito Selatan       | 0.0062                | 0.0021              | 0.0048           | 0.0030                 | 0.0095             | 0.0116             | 0.0049     | 0.0025  | 0.0018            | 0.0012        | 0.0040     |
| 84  | Kalteng  | Barito Utara         | 0.0153                | 0.0080              | 0.0102           | 0.0030                 | 0.0095             | 0.0116             | 0.0049     | 0.0025  | 0.0018            | 0.0020        | 0.0040     |
| 85  | Kalteng  | Kapuas               | 0.0062                | 0.0036              | 0.0102           | 0.0030                 | 0.0048             | 0.0116             | 0.0049     | 0.0012  | 0.0018            | 0.0020        | 0.0019     |
| 86  | Kaltim   | Berau                | 0.0020                | 0.0021              | 0.0048           | 0.0037                 | 0.0048             | 0.0116             | 0.0049     | 0.0003  | 0.0002            | 0.0003        | 0.0005     |
| 87  | Kaltim   | Bulungan             | 0.0153                | 0.0163              | 0.0102           | 0.0023                 | 0.0024             | 0.0116             | 0.0012     | 0.0025  | 0.0009            | 0.0012        | 0.0019     |
| 88  | Kaltim   | Kutai                | 0.0020                | 0.0021              | 0.0025           | 0.0037                 | 0.0048             | 0.0116             | 0.0012     | 0.0025  | 0.0009            | 0.0012        | 0.0019     |
| 89  | Kaltim   | Kutai Timur          | 0.0062                | 0.0021              | 0.0214           | 0.0023                 | 0.0024             | 0.0116             | 0.0012     | 0.0012  | 0.0004            | 0.0003        | 0.0019     |
| 90  | Kaltim   | Nunukan              | 0.0153                | 0.0080              | 0.0102           | 0.0030                 | 0.0048             | 0.0094             | 0.0005     | 0.0041  | 0.0031            | 0.0020        | 0.0067     |
| 91  | Kaltim   | Pasir                | 0.0062                | 0.0036              | 0.0102           | 0.0023                 | 0.0024             | 0.0116             | 0.0025     | 0.0012  | 0.0009            | 0.0012        | 0.0009     |
| 92  | Lampung  | Lampung Barat        | 0.0153                | 0.0080              | 0.0102           | 0.0037                 | 0.0095             | 0.0116             | 0.0049     | 0.0025  | 0.0031            | 0.0032        | 0.0040     |
| 93  | Lampung  | Lampung Selatan      | 0.0034                | 0.0021              | 0.0025           | 0.0030                 | 0.0095             | 0.0116             | 0.0049     | 0.0012  | 0.0009            | 0.0012        | 0.0019     |
| 94  | Lampung  | Lampung Timur        | 0.0062                | 0.0021              | 0.0048           | 0.0023                 | 0.0048             | 0.0094             | 0.0049     | 0.0012  | 0.0018            | 0.0012        | 0.0019     |
| 95  | Lampung  | Lampung Utara        | 0.0034                | 0.0021              | 0.0048           | 0.0023                 | 0.0095             | 0.0116             | 0.0049     | 0.0003  | 0.0002            | 0.0012        | 0.0009     |
| 96  | Lampung  | Way Kanan            | 0.0153                | 0.0080              | 0.0102           | 0.0030                 | 0.0095             | 0.0116             | 0.0049     | 0.0041  | 0.0018            | 0.0032        | 0.0019     |
| 97  | NTB      | Bima                 | 0.0153                | 0.0036              | 0.0214           | 0.0030                 | 0.0048             | 0.0094             | 0.0049     | 0.0012  | 0.0018            | 0.0032        | 0.0040     |
| 98  | NTB      | Dompu                | 0.0062                | 0.0036              | 0.0102           | 0.0030                 | 0.0095             | 0.0116             | 0.0049     | 0.0025  | 0.0031            | 0.0032        | 0.0040     |
| 99  | NTB      | Lombok Barat         | 0.0153                | 0.0080              | 0.0102           | 0.0030                 | 0.0048             | 0.0094             | 0.0049     | 0.0012  | 0.0009            | 0.0012        | 0.0019     |
| 100 | NTB      | Lombok Timur         | 0.0254                | 0.0080              | 0.0048           | 0.0037                 | 0.0095             | 0.0116             | 0.0049     | 0.0012  | 0.0018            | 0.0020        | 0.0040     |
| 101 | NTT      | Belu                 | 0.0153                | 0.0036              | 0.0102           | 0.0030                 | 0.0095             | 0.0116             | 0.0049     | 0.0041  | 0.0031            | 0.0005        | 0.0019     |
| 102 | NTT      | Ende                 | 0.0062                | 0.0036              | 0.0214           | 0.0023                 | 0.0095             | 0.0116             | 0.0049     | 0.0012  | 0.0004            | 0.0012        | 0.0009     |
| 103 | NTT      | Flores Timur         | 0.0034                | 0.0036              | 0.0102           | 0.0030                 | 0.0095             | 0.0116             | 0.0049     | 0.0012  | 0.0009            | 0.0012        | 0.0019     |
| 104 | NTT      | Manggarai            | 0.0034                | 0.0021              | 0.0048           | 0.0023                 | 0.0095             | 0.0116             | 0.0025     | 0.0006  | 0.0009            | 0.0012        | 0.0005     |
| 105 | NTT      | Ngada                | 0.0153                | 0.0036              | 0.0048           | 0.0023                 | 0.0048             | 0.0116             | 0.0049     | 0.0012  | 0.0009            | 0.0003        | 0.0009     |
| 106 | NTT      | Sumba Barat          | 0.0020                | 0.0036              | 0.0214           | 0.0023                 | 0.0024             | 0.0094             | 0.0049     | 0.0006  | 0.0004            | 0.0012        | 0.0019     |
| 107 | NTT      | Timur Tengah Selatan | 0.0153                | 0.0080              | 0.0102           | 0.0023                 | 0.0095             | 0.0116             | 0.0049     | 0.0025  | 0.0031            | 0.0020        | 0.0019     |
| 108 | NTT      | Timur Tengah Utara   | 0.0153                | 0.0036              | 0.0102           | 0.0023                 | 0.0095             | 0.0116             | 0.0049     | 0.0041  | 0.0018            | 0.0005        | 0.0019     |

| NO  | PROPINSI | KABUPATEN             | FAKTOR SOSIAL POLITIK |                     |                  |                        |                    |                    |            |         |                   |               |            |
|-----|----------|-----------------------|-----------------------|---------------------|------------------|------------------------|--------------------|--------------------|------------|---------|-------------------|---------------|------------|
|     |          |                       | Keamanan              |                     |                  | Sosial Politik         |                    |                    |            | Budaya  |                   |               |            |
|     |          |                       | Gangguan Usaha        | Gangguan Masyarakat | Kecepatan Aparat | Partisipasi Masyarakat | Konflik Masyarakat | Stabilitas Politik | Unjuk Rasa | Terbuka | Non Diskriminatif | Adat-istiadat | Etos Kerja |
|     |          |                       | 0.0523                | 0.0311              | 0.0724           | 0.012                  | 0.0184             | 0.0289             | 0.0095     | 0.0086  | 0.0064            | 0.0071        | 0.0141     |
| 109 | Papua    | Fak-Fak               | 0.0062                | 0.0036              | 0.0102           | 0.0037                 | 0.0048             | 0.0020             | 0.0025     | 0.0003  | 0.0002            | 0.0003        | 0.0005     |
| 110 | Papua    | Jayawijaya            | 0.0034                | 0.0012              | 0.0095           | 0.0017                 | 0.0095             | 0.0116             | 0.0012     | 0.0003  | 0.0002            | 0.0003        | 0.0005     |
| 111 | Papua    | Manokwari             | 0.0034                | 0.0036              | 0.0102           | 0.0037                 | 0.0095             | 0.0116             | 0.0049     | 0.0012  | 0.0009            | 0.0012        | 0.0005     |
| 112 | Papua    | Mimika                | 0.0020                | 0.0012              | 0.0102           | 0.0017                 | 0.0095             | 0.0116             | 0.0012     | 0.0003  | 0.0002            | 0.0003        | 0.0009     |
| 113 | Papua    | Sorong                | 0.0034                | 0.0021              | 0.0102           | 0.0037                 | 0.0024             | 0.0016             | 0.0012     | 0.0006  | 0.0009            | 0.0005        | 0.0009     |
| 114 | Riau     | Bengkalis             | 0.0062                | 0.0080              | 0.0102           | 0.0037                 | 0.0095             | 0.0116             | 0.0049     | 0.0003  | 0.0002            | 0.0012        | 0.0005     |
| 115 | Riau     | Indragiri Hilir       | 0.0062                | 0.0021              | 0.0102           | 0.0037                 | 0.0095             | 0.0116             | 0.0049     | 0.0012  | 0.0018            | 0.0012        | 0.0040     |
| 116 | Riau     | Kampar                | 0.0034                | 0.0012              | 0.0102           | 0.0037                 | 0.0095             | 0.0116             | 0.0025     | 0.0003  | 0.0004            | 0.0012        | 0.0019     |
| 117 | Riau     | Kuantan Singingi      | 0.0153                | 0.0036              | 0.0048           | 0.0037                 | 0.0095             | 0.0116             | 0.0049     | 0.0012  | 0.0009            | 0.0012        | 0.0009     |
| 118 | Riau     | Pelalawan             | 0.0062                | 0.0036              | 0.0102           | 0.0037                 | 0.0048             | 0.0094             | 0.0005     | 0.0025  | 0.0031            | 0.0032        | 0.0067     |
| 119 | Riau     | Rokan Hulu            | 0.0020                | 0.0012              | 0.0102           | 0.0037                 | 0.0095             | 0.0094             | 0.0049     | 0.0003  | 0.0002            | 0.0005        | 0.0009     |
| 120 | Sulsel   | Bantaeng              | 0.0153                | 0.0080              | 0.0048           | 0.0030                 | 0.0095             | 0.0116             | 0.0049     | 0.0012  | 0.0002            | 0.0005        | 0.0009     |
| 121 | Sulsel   | Barru                 | 0.0153                | 0.0080              | 0.0102           | 0.0030                 | 0.0095             | 0.0116             | 0.0049     | 0.0025  | 0.0018            | 0.0020        | 0.0040     |
| 122 | Sulsel   | Bone                  | 0.0062                | 0.0036              | 0.0214           | 0.0023                 | 0.0095             | 0.0116             | 0.0049     | 0.0025  | 0.0031            | 0.0032        | 0.0067     |
| 123 | Sulsel   | Enrekang              | 0.0153                | 0.0080              | 0.0102           | 0.0030                 | 0.0095             | 0.0116             | 0.0049     | 0.0012  | 0.0031            | 0.0032        | 0.0067     |
| 124 | Sulsel   | Gowa                  | 0.0062                | 0.0036              | 0.0214           | 0.0030                 | 0.0095             | 0.0116             | 0.0049     | 0.0012  | 0.0018            | 0.0032        | 0.0040     |
| 125 | Sulsel   | Jeneponto             | 0.0254                | 0.0080              | 0.0102           | 0.0030                 | 0.0095             | 0.0116             | 0.0049     | 0.0006  | 0.0009            | 0.0012        | 0.0040     |
| 126 | Sulsel   | Luwu                  | 0.0034                | 0.0036              | 0.0048           | 0.0037                 | 0.0095             | 0.0116             | 0.0049     | 0.0012  | 0.0009            | 0.0020        | 0.0040     |
| 127 | Sulsel   | Luwu Utara            | 0.0062                | 0.0021              | 0.0214           | 0.0030                 | 0.0095             | 0.0116             | 0.0049     | 0.0041  | 0.0031            | 0.0020        | 0.0019     |
| 128 | Sulsel   | Majene                | 0.0153                | 0.0080              | 0.0102           | 0.0030                 | 0.0095             | 0.0116             | 0.0049     | 0.0041  | 0.0031            | 0.0032        | 0.0067     |
| 129 | Sulsel   | Maros                 | 0.0062                | 0.0021              | 0.0214           | 0.0030                 | 0.0095             | 0.0116             | 0.0049     | 0.0012  | 0.0004            | 0.0012        | 0.0009     |
| 130 | Sulsel   | Pangkep               | 0.0153                | 0.0080              | 0.0102           | 0.0023                 | 0.0095             | 0.0116             | 0.0049     | 0.0006  | 0.0009            | 0.0012        | 0.0019     |
| 131 | Sulsel   | Pinrang               | 0.0062                | 0.0080              | 0.0102           | 0.0030                 | 0.0095             | 0.0116             | 0.0049     | 0.0025  | 0.0031            | 0.0032        | 0.0067     |
| 132 | Sulsel   | Selayar               | 0.0153                | 0.0163              | 0.0102           | 0.0030                 | 0.0095             | 0.0116             | 0.0049     | 0.0025  | 0.0004            | 0.0005        | 0.0019     |
| 133 | Sulsel   | Sinjai                | 0.0153                | 0.0080              | 0.0214           | 0.0030                 | 0.0095             | 0.0116             | 0.0025     | 0.0012  | 0.0031            | 0.0032        | 0.0040     |
| 134 | Sulsel   | Takalar               | 0.0062                | 0.0036              | 0.0025           | 0.0030                 | 0.0095             | 0.0116             | 0.0049     | 0.0041  | 0.0031            | 0.0012        | 0.0019     |
| 135 | Sulsel   | Tana Toraja           | 0.0153                | 0.0036              | 0.0048           | 0.0023                 | 0.0095             | 0.0116             | 0.0049     | 0.0006  | 0.0009            | 0.0012        | 0.0009     |
| 136 | Sulteng  | Banggai               | 0.0254                | 0.0080              | 0.0102           | 0.0037                 | 0.0095             | 0.0094             | 0.0005     | 0.0003  | 0.0002            | 0.0032        | 0.0067     |
| 137 | Sulteng  | Donggala              | 0.0062                | 0.0012              | 0.0102           | 0.0030                 | 0.0095             | 0.0116             | 0.0025     | 0.0025  | 0.0004            | 0.0020        | 0.0009     |
| 138 | Sulteng  | Morowali              | 0.0020                | 0.0021              | 0.0025           | 0.0037                 | 0.0024             | 0.0094             | 0.0025     | 0.0006  | 0.0009            | 0.0005        | 0.0009     |
| 139 | Sulteng  | Poso                  | 0.0020                | 0.0012              | 0.0025           | 0.0037                 | 0.0024             | 0.0016             | 0.0025     | 0.0006  | 0.0002            | 0.0012        | 0.0019     |
| 140 | Sulteng  | Toli-Toli             | 0.0062                | 0.0036              | 0.0025           | 0.0037                 | 0.0095             | 0.0048             | 0.0049     | 0.0012  | 0.0009            | 0.0012        | 0.0019     |
| 141 | Sultra   | Buton                 | 0.0153                | 0.0080              | 0.0102           | 0.0023                 | 0.0095             | 0.0116             | 0.0049     | 0.0041  | 0.0031            | 0.0032        | 0.0040     |
| 142 | Sultra   | Kolaka                | 0.0062                | 0.0036              | 0.0214           | 0.0037                 | 0.0095             | 0.0116             | 0.0025     | 0.0012  | 0.0009            | 0.0020        | 0.0019     |
| 143 | Sulut    | Minahasa              | 0.0062                | 0.0036              | 0.0048           | 0.0037                 | 0.0095             | 0.0116             | 0.0049     | 0.0041  | 0.0031            | 0.0032        | 0.0040     |
| 144 | Sulut    | Sangihe               | 0.0062                | 0.0080              | 0.0214           | 0.0030                 | 0.0095             | 0.0116             | 0.0049     | 0.0025  | 0.0031            | 0.0020        | 0.0040     |
| 145 | Sumbar   | Pasaman               | 0.0034                | 0.0036              | 0.0048           | 0.0030                 | 0.0095             | 0.0116             | 0.0049     | 0.0012  | 0.0009            | 0.0020        | 0.0040     |
| 146 | Sumbar   | Pesisir Selatan       | 0.0153                | 0.0080              | 0.0048           | 0.0030                 | 0.0095             | 0.0116             | 0.0049     | 0.0012  | 0.0009            | 0.0005        | 0.0040     |
| 147 | Sumbar   | Sawah Lunto Sijunjung | 0.0062                | 0.0036              | 0.0102           | 0.0030                 | 0.0095             | 0.0116             | 0.0049     | 0.0003  | 0.0004            | 0.0012        | 0.0009     |
| 148 | Sumbar   | Solok                 | 0.0153                | 0.0080              | 0.0025           | 0.0030                 | 0.0095             | 0.0116             | 0.0049     | 0.0012  | 0.0009            | 0.0012        | 0.0009     |
| 149 | Sumsel   | Lahat                 | 0.0153                | 0.0036              | 0.0214           | 0.0037                 | 0.0095             | 0.0116             | 0.0049     | 0.0012  | 0.0009            | 0.0005        | 0.0005     |
| 150 | Sumsel   | Muara Enim            | 0.0062                | 0.0080              | 0.0102           | 0.0037                 | 0.0095             | 0.0116             | 0.0049     | 0.0006  | 0.0004            | 0.0012        | 0.0019     |
| 151 | Sumsel   | Musi Banyuasin        | 0.0153                | 0.0080              | 0.0102           | 0.0030                 | 0.0095             | 0.0116             | 0.0049     | 0.0025  | 0.0018            | 0.0020        | 0.0019     |
| 152 | Sumsel   | Musi Rawas            | 0.0034                | 0.0012              | 0.0214           | 0.0023                 | 0.0095             | 0.0116             | 0.0049     | 0.0041  | 0.0031            | 0.0012        | 0.0009     |
| 153 | Sumsel   | Ogan Kemiling Ilir    | 0.0034                | 0.0021              | 0.0102           | 0.0023                 | 0.0095             | 0.0116             | 0.0049     | 0.0025  | 0.0004            | 0.0005        | 0.0005     |
| 154 | Sumut    | Asahan                | 0.0034                | 0.0021              | 0.0102           | 0.0030                 | 0.0095             | 0.0116             | 0.0049     | 0.0003  | 0.0002            | 0.0005        | 0.0009     |
| 155 | Sumut    | Dairi                 | 0.0020                | 0.0021              | 0.0048           | 0.0023                 | 0.0095             | 0.0116             | 0.0049     | 0.0041  | 0.0031            | 0.0005        | 0.0009     |
| 156 | Sumut    | Deli Serdang          | 0.0020                | 0.0021              | 0.0025           | 0.0030                 | 0.0095             | 0.0116             | 0.0049     | 0.0025  | 0.0009            | 0.0012        | 0.0040     |
| 157 | Sumut    | Labuhan Batu          | 0.0034                | 0.0021              | 0.0025           | 0.0023                 | 0.0095             | 0.0116             | 0.0049     | 0.0041  | 0.0018            | 0.0005        | 0.0009     |
| 158 | Sumut    | Langkat               | 0.0062                | 0.0021              | 0.0102           | 0.0023                 | 0.0095             | 0.0116             | 0.0049     | 0.0012  | 0.0009            | 0.0005        | 0.0009     |
| 159 | Sumut    | Simalungun            | 0.0062                | 0.0036              | 0.0214           | 0.0023                 | 0.0095             | 0.0116             | 0.0049     | 0.0006  | 0.0004            | 0.0005        | 0.0009     |
| 160 | Sumut    | Tanah Karo            | 0.0020                | 0.0012              | 0.0048           | 0.0030                 | 0.0095             | 0.0116             | 0.0049     | 0.0003  | 0.0002            | 0.0003        | 0.0009     |
| 161 | Sumut    | Tapanuli Utara        | 0.0062                | 0.0036              | 0.0214           | 0.0037                 | 0.0095             | 0.0116             | 0.0049     | 0.0012  | 0.0009            | 0.0012        | 0.0019     |

**Lampiran 12.A : Intensitas Indikator Faktor Infrastruktur Fisik 53 Kota**  
*The Intensity of 53 Cities of Physical Infrastructure Indicators*

| NO | PROPINSI  | KOTA             | FAKTOR INFRASTRUKTUR FISIK       |                |                 |         |         |                              |                |                 |         |         |
|----|-----------|------------------|----------------------------------|----------------|-----------------|---------|---------|------------------------------|----------------|-----------------|---------|---------|
|    |           |                  | Ketersediaan Infrastruktur Fisik |                |                 |         |         | Kualitas Infrastruktur Fisik |                |                 |         |         |
|    |           |                  | Jalan                            | Pelabuhan Laut | Pelabuhan Udara | Listrik | Telepon | Jalan                        | Pelabuhan Laut | Pelabuhan Udara | Listrik | Telepon |
|    |           |                  | 0.0138                           | 0.0141         | 0.0058          | 0.016   | 0.0175  | 0.0095                       | 0.0089         | 0.0073          | 0.204   | 0.0139  |
| 1  | Bali      | Denpasar         | 0.0040                           | 0.0051         | 0.0017          | 0.0071  | 0.0070  | 0.0035                       | 0.0035         | 0.0026          | 0.0074  | 0.0052  |
| 2  | Babel     | Pangkal Pinang   | 0.0040                           | 0.0038         | 0.0017          | 0.0044  | 0.0007  | 0.0018                       | 0.0031         | 0.0022          | 0.0074  | 0.0004  |
| 3  | Banten    | Cilegon          | 0.0040                           | 0.0051         | 0.0017          | 0.0071  | 0.0070  | 0.0018                       | 0.0035         | 0.0022          | 0.0074  | 0.0052  |
| 4  | Banten    | Tangerang        | 0.0066                           | 0.0038         | 0.0017          | 0.0071  | 0.0057  | 0.0035                       | 0.0035         | 0.0026          | 0.0074  | 0.0052  |
| 5  | Bengkulu  | Bengkulu         | 0.0005                           | 0.0006         | 0.0017          | 0.0010  | 0.0011  | 0.0006                       | 0.0014         | 0.0022          | 0.0016  | 0.0008  |
| 6  | DIY       | Yogyakarta       | 0.0040                           | 0.0033         | 0.0017          | 0.0071  | 0.0057  | 0.0035                       | 0.0014         | 0.0026          | 0.0074  | 0.0052  |
| 7  | DKI       | Jakarta          | 0.0066                           | 0.0051         | 0.0017          | 0.0071  | 0.0070  | 0.0035                       | 0.0035         | 0.0026          | 0.0074  | 0.0052  |
| 8  | Gorontalo | Gorontalo        | 0.0040                           | 0.0038         | 0.0017          | 0.0071  | 0.0057  | 0.0035                       | 0.0031         | 0.0022          | 0.0074  | 0.0052  |
| 9  | Jambi     | Jambi            | 0.0018                           | 0.0033         | 0.0017          | 0.0044  | 0.0029  | 0.0018                       | 0.0031         | 0.0026          | 0.0033  | 0.0022  |
| 10 | Jabar     | Bandung          | 0.0066                           | 0.0033         | 0.0017          | 0.0071  | 0.0057  | 0.0018                       | 0.0014         | 0.0022          | 0.0033  | 0.0052  |
| 11 | Jabar     | Bekasi           | 0.0066                           | 0.0033         | 0.0017          | 0.0071  | 0.0070  | 0.0018                       | 0.0014         | 0.0022          | 0.0033  | 0.0022  |
| 12 | Jabar     | Bogor            | 0.0040                           | 0.0038         | 0.0017          | 0.0071  | 0.0057  | 0.0018                       | 0.0031         | 0.0022          | 0.0074  | 0.0052  |
| 13 | Jabar     | Cirebon          | 0.0040                           | 0.0033         | 0.0006          | 0.0044  | 0.0057  | 0.0035                       | 0.0014         | 0.0007          | 0.0033  | 0.0022  |
| 14 | Jabar     | Sukabumi         | 0.0040                           | 0.0033         | 0.0017          | 0.0044  | 0.0057  | 0.0006                       | 0.0014         | 0.0022          | 0.0074  | 0.0052  |
| 15 | Jateng    | Pekalongan       | 0.0040                           | 0.0051         | 0.0006          | 0.0071  | 0.0057  | 0.0035                       | 0.0014         | 0.0003          | 0.0074  | 0.0052  |
| 16 | Jateng    | Semarang         | 0.0066                           | 0.0051         | 0.0017          | 0.0071  | 0.0057  | 0.0018                       | 0.0031         | 0.0026          | 0.0033  | 0.0052  |
| 17 | Jateng    | Surakarta        | 0.0066                           | 0.0033         | 0.0017          | 0.0071  | 0.0057  | 0.0018                       | 0.0014         | 0.0022          | 0.0074  | 0.0052  |
| 18 | Jateng    | Tegal            | 0.0040                           | 0.0051         | 0.0006          | 0.0071  | 0.0070  | 0.0035                       | 0.0031         | 0.0015          | 0.0074  | 0.0052  |
| 19 | Jatim     | Kediri           | 0.0040                           | 0.0033         | 0.0017          | 0.0071  | 0.0057  | 0.0018                       | 0.0014         | 0.0022          | 0.0074  | 0.0052  |
| 20 | Jatim     | Madiun           | 0.0040                           | 0.0013         | 0.0006          | 0.0044  | 0.0057  | 0.0035                       | 0.0003         | 0.0003          | 0.0074  | 0.0052  |
| 21 | Jatim     | Malang           | 0.0066                           | 0.0013         | 0.0017          | 0.0071  | 0.0070  | 0.0035                       | 0.0014         | 0.0015          | 0.0074  | 0.0052  |
| 22 | Jatim     | Mojokerto        | 0.0040                           | 0.0038         | 0.0017          | 0.0071  | 0.0070  | 0.0035                       | 0.0014         | 0.0015          | 0.0074  | 0.0052  |
| 23 | Jatim     | Probolinggo      | 0.0040                           | 0.0038         | 0.0017          | 0.0071  | 0.0057  | 0.0018                       | 0.0031         | 0.0026          | 0.0074  | 0.0052  |
| 24 | Jatim     | Surabaya         | 0.0066                           | 0.0051         | 0.0017          | 0.0071  | 0.0070  | 0.0035                       | 0.0035         | 0.0026          | 0.0074  | 0.0052  |
| 25 | Kalbar    | Pontianak        | 0.0040                           | 0.0051         | 0.0017          | 0.0044  | 0.0029  | 0.0035                       | 0.0031         | 0.0026          | 0.0033  | 0.0022  |
| 26 | Kalsel    | Banjarmasin      | 0.0040                           | 0.0038         | 0.0017          | 0.0044  | 0.0029  | 0.0018                       | 0.0031         | 0.0026          | 0.0033  | 0.0022  |
| 27 | Kalteng   | Palangkaraya     | 0.0018                           | 0.0033         | 0.0017          | 0.0031  | 0.0029  | 0.0018                       | 0.0031         | 0.0015          | 0.0033  | 0.0022  |
| 28 | Kaltim    | Balikpapan       | 0.0040                           | 0.0051         | 0.0017          | 0.0071  | 0.0057  | 0.0035                       | 0.0031         | 0.0026          | 0.0033  | 0.0022  |
| 29 | Kaltim    | Samarinda        | 0.0018                           | 0.0038         | 0.0017          | 0.0044  | 0.0029  | 0.0018                       | 0.0031         | 0.0015          | 0.0033  | 0.0022  |
| 30 | Lampung   | Bandar Lampung   | 0.0040                           | 0.0038         | 0.0017          | 0.0031  | 0.0029  | 0.0018                       | 0.0014         | 0.0022          | 0.0033  | 0.0008  |
| 31 | NTB       | Mataram          | 0.0040                           | 0.0051         | 0.0017          | 0.0044  | 0.0029  | 0.0035                       | 0.0031         | 0.0026          | 0.0074  | 0.0022  |
| 32 | NTT       | Kupang           | 0.0018                           | 0.0051         | 0.0017          | 0.0031  | 0.0029  | 0.0018                       | 0.0031         | 0.0015          | 0.0033  | 0.0022  |
| 33 | Papua     | Jayapura         | 0.0018                           | 0.0033         | 0.0017          | 0.0010  | 0.0007  | 0.0006                       | 0.0014         | 0.0015          | 0.0016  | 0.0008  |
| 34 | Papua     | Sorong           | 0.0018                           | 0.0013         | 0.0006          | 0.0010  | 0.0007  | 0.0006                       | 0.0014         | 0.0015          | 0.0016  | 0.0008  |
| 35 | Riau      | Batam            | 0.0066                           | 0.0051         | 0.0017          | 0.0071  | 0.0057  | 0.0035                       | 0.0035         | 0.0026          | 0.0074  | 0.0052  |
| 36 | Riau      | Dumai            | 0.0018                           | 0.0051         | 0.0017          | 0.0044  | 0.0029  | 0.0018                       | 0.0031         | 0.0015          | 0.0074  | 0.0022  |
| 37 | Riau      | Pekanbaru        | 0.0066                           | 0.0038         | 0.0017          | 0.0044  | 0.0029  | 0.0035                       | 0.0031         | 0.0026          | 0.0033  | 0.0022  |
| 38 | Riau      | Tanjung Pinang   | 0.0040                           | 0.0038         | 0.0006          | 0.0031  | 0.0029  | 0.0018                       | 0.0031         | 0.0015          | 0.0033  | 0.0008  |
| 39 | Sulsel    | Makassar         | 0.0066                           | 0.0051         | 0.0017          | 0.0071  | 0.0057  | 0.0035                       | 0.0035         | 0.0026          | 0.0074  | 0.0052  |
| 40 | Sulsel    | Pare-Pare        | 0.0040                           | 0.0038         | 0.0017          | 0.0044  | 0.0041  | 0.0035                       | 0.0031         | 0.0022          | 0.0074  | 0.0022  |
| 41 | Sulteng   | Palu             | 0.0005                           | 0.0038         | 0.0017          | 0.0031  | 0.0007  | 0.0006                       | 0.0031         | 0.0026          | 0.0033  | 0.0004  |
| 42 | Sultra    | Kendari          | 0.0018                           | 0.0038         | 0.0017          | 0.0031  | 0.0029  | 0.0018                       | 0.0031         | 0.0026          | 0.0033  | 0.0022  |
| 43 | Sulut     | Bitung           | 0.0018                           | 0.0051         | 0.0017          | 0.0044  | 0.0029  | 0.0018                       | 0.0031         | 0.0026          | 0.0033  | 0.0022  |
| 44 | Sulut     | Manado           | 0.0040                           | 0.0038         | 0.0017          | 0.0044  | 0.0029  | 0.0018                       | 0.0031         | 0.0026          | 0.0033  | 0.0022  |
| 45 | Sumbar    | Padang           | 0.0040                           | 0.0038         | 0.0017          | 0.0031  | 0.0011  | 0.0018                       | 0.0031         | 0.0026          | 0.0033  | 0.0008  |
| 46 | Sumbar    | Sawahlunto       | 0.0018                           | 0.0033         | 0.0017          | 0.0031  | 0.0029  | 0.0018                       | 0.0014         | 0.0022          | 0.0033  | 0.0022  |
| 47 | Sumsel    | Palembang        | 0.0040                           | 0.0051         | 0.0017          | 0.0071  | 0.0029  | 0.0035                       | 0.0031         | 0.0026          | 0.0074  | 0.0022  |
| 48 | Sumut     | Binjai           | 0.0018                           | 0.0033         | 0.0017          | 0.0044  | 0.0029  | 0.0018                       | 0.0014         | 0.0022          | 0.0033  | 0.0022  |
| 49 | Sumut     | Medan            | 0.0066                           | 0.0051         | 0.0017          | 0.0071  | 0.0070  | 0.0035                       | 0.0035         | 0.0022          | 0.0074  | 0.0052  |
| 50 | Sumut     | Pematang Siantar | 0.0018                           | 0.0006         | 0.0003          | 0.0031  | 0.0029  | 0.0018                       | 0.0003         | 0.0003          | 0.0033  | 0.0022  |
| 51 | Sumut     | Sibolga          | 0.0018                           | 0.0038         | 0.0006          | 0.0044  | 0.0029  | 0.0018                       | 0.0031         | 0.0015          | 0.0033  | 0.0022  |
| 52 | Sumut     | Tanjung Balai    | 0.0040                           | 0.0038         | 0.0017          | 0.0031  | 0.0057  | 0.0018                       | 0.0031         | 0.0015          | 0.0033  | 0.0052  |
| 53 | Sumut     | Tebing Tinggi    | 0.0040                           | 0.0038         | 0.0017          | 0.0044  | 0.0041  | 0.0035                       | 0.0031         | 0.0022          | 0.0074  | 0.0052  |

**Lampiran 12.B : Intensitas Indikator Faktor Infrastruktur Fisik 161 Kabupaten/**  
*The Intensity of 161 Regencies of Physical Infrastructure Indicators*

| NO | PROPINSI  | KABUPATEN            | FAKTOR INFRASTRUKTUR FISIK       |                |                 |         |         |                              |                |                 |         |         |
|----|-----------|----------------------|----------------------------------|----------------|-----------------|---------|---------|------------------------------|----------------|-----------------|---------|---------|
|    |           |                      | Ketersediaan Infrastruktur Fisik |                |                 |         |         | Kualitas Infrastruktur Fisik |                |                 |         |         |
|    |           |                      | Jalan                            | Pelabuhan Laut | Pelabuhan Udara | Listrik | Telepon | Jalan                        | Pelabuhan Laut | Pelabuhan Udara | Listrik | Telepon |
|    |           |                      | 0.0138                           | 0.0141         | 0.0058          | 0.016   | 0.0175  | 0.0095                       | 0.0089         | 0.0073          | 0.204   | 0.0139  |
| 1  | Bali      | Badung               | 0.0040                           | 0.0038         | 0.0017          | 0.0031  | 0.0057  | 0.0035                       | 0.0031         | 0.0026          | 0.0074  | 0.0022  |
| 2  | Bali      | Bangli               | 0.0040                           | 0.0038         | 0.0017          | 0.0010  | 0.0029  | 0.0040                       | 0.0031         | 0.0022          | 0.0016  | 0.0022  |
| 3  | Bali      | Buleleng             | 0.0040                           | 0.0033         | 0.0017          | 0.0044  | 0.0057  | 0.0018                       | 0.0014         | 0.0022          | 0.0033  | 0.0022  |
| 4  | Bali      | Gianyar              | 0.0040                           | 0.0038         | 0.0017          | 0.0031  | 0.0057  | 0.0035                       | 0.0031         | 0.0022          | 0.0074  | 0.0022  |
| 5  | Bali      | Jembrana             | 0.0040                           | 0.0033         | 0.0017          | 0.0031  | 0.0057  | 0.0040                       | 0.0031         | 0.0022          | 0.0074  | 0.0022  |
| 6  | Bali      | Karangasem           | 0.0040                           | 0.0038         | 0.0017          | 0.0010  | 0.0029  | 0.0035                       | 0.0031         | 0.0022          | 0.0016  | 0.0022  |
| 7  | Bali      | Klungkung            | 0.0040                           | 0.0038         | 0.0017          | 0.0031  | 0.0057  | 0.0035                       | 0.0031         | 0.0022          | 0.0074  | 0.0022  |
| 8  | Bali      | Tabanan              | 0.0040                           | 0.0033         | 0.0017          | 0.0031  | 0.0057  | 0.0035                       | 0.0031         | 0.0022          | 0.0074  | 0.0022  |
| 9  | Babel     | Bangka               | 0.0040                           | 0.0038         | 0.0017          | 0.0044  | 0.0007  | 0.0035                       | 0.0031         | 0.0022          | 0.0008  | 0.0004  |
| 10 | Babel     | Belitung             | 0.0018                           | 0.0038         | 0.0017          | 0.0005  | 0.0007  | 0.0035                       | 0.0031         | 0.0022          | 0.0008  | 0.0004  |
| 11 | Banten    | Lebak                | 0.0009                           | 0.0033         | 0.0017          | 0.0031  | 0.0029  | 0.0018                       | 0.0014         | 0.0015          | 0.0033  | 0.0022  |
| 12 | Banten    | Serang               | 0.0040                           | 0.0038         | 0.0017          | 0.0044  | 0.0029  | 0.0035                       | 0.0031         | 0.0022          | 0.0074  | 0.0052  |
| 13 | Banten    | Tangerang            | 0.0066                           | 0.0051         | 0.0017          | 0.0071  | 0.0057  | 0.0035                       | 0.0035         | 0.0026          | 0.0074  | 0.0052  |
| 14 | Bengkulu  | Bengkulu Selatan     | 0.0005                           | 0.0006         | 0.0006          | 0.0010  | 0.0007  | 0.0003                       | 0.0003         | 0.0015          | 0.0008  | 0.0004  |
| 15 | Bengkulu  | Bengkulu Utara       | 0.0018                           | 0.0033         | 0.0017          | 0.0031  | 0.0007  | 0.0018                       | 0.0014         | 0.0015          | 0.0033  | 0.0004  |
| 16 | Bengkulu  | Rejang Lebong        | 0.0009                           | 0.0013         | 0.0017          | 0.0031  | 0.0029  | 0.0018                       | 0.0006         | 0.0015          | 0.0033  | 0.0022  |
| 17 | DIY       | Bantul               | 0.0040                           | 0.0033         | 0.0017          | 0.0044  | 0.0057  | 0.0035                       | 0.0014         | 0.0026          | 0.0033  | 0.0052  |
| 18 | DIY       | Gunung Kidul         | 0.0018                           | 0.0006         | 0.0006          | 0.0031  | 0.0029  | 0.0018                       | 0.0006         | 0.0015          | 0.0033  | 0.0022  |
| 19 | Gorontalo | Gorontalo            | 0.0018                           | 0.0033         | 0.0017          | 0.0031  | 0.0029  | 0.0018                       | 0.0014         | 0.0015          | 0.0033  | 0.0022  |
| 20 | Jambi     | Batanghari           | 0.0018                           | 0.0033         | 0.0017          | 0.0005  | 0.0011  | 0.0006                       | 0.0014         | 0.0022          | 0.0016  | 0.0008  |
| 21 | Jambi     | Bungo                | 0.0009                           | 0.0033         | 0.0017          | 0.0010  | 0.0007  | 0.0006                       | 0.0014         | 0.0015          | 0.0008  | 0.0004  |
| 22 | Jambi     | Kerinci              | 0.0018                           | 0.0006         | 0.0017          | 0.0031  | 0.0029  | 0.0018                       | 0.0003         | 0.0015          | 0.0016  | 0.0008  |
| 23 | Jambi     | Tanjung Jabung Timur | 0.0005                           | 0.0038         | 0.0003          | 0.0005  | 0.0007  | 0.0003                       | 0.0014         | 0.0003          | 0.0008  | 0.0004  |
| 24 | Jambi     | Tebo                 | 0.0009                           | 0.0006         | 0.0003          | 0.0010  | 0.0011  | 0.0006                       | 0.0003         | 0.0003          | 0.0033  | 0.0008  |
| 25 | Jabar     | Bandung              | 0.0018                           | 0.0013         | 0.0017          | 0.0044  | 0.0029  | 0.0018                       | 0.0006         | 0.0015          | 0.0074  | 0.0052  |
| 26 | Jabar     | Bekasi               | 0.0066                           | 0.0051         | 0.0017          | 0.0071  | 0.0070  | 0.0018                       | 0.0031         | 0.0026          | 0.0033  | 0.0022  |
| 27 | Jabar     | Bogor                | 0.0018                           | 0.0038         | 0.0017          | 0.0044  | 0.0057  | 0.0018                       | 0.0031         | 0.0026          | 0.0074  | 0.0022  |
| 28 | Jabar     | Ciamis               | 0.0018                           | 0.0013         | 0.0006          | 0.0031  | 0.0029  | 0.0018                       | 0.0006         | 0.0015          | 0.0033  | 0.0022  |
| 29 | Jabar     | Cianjur              | 0.0018                           | 0.0033         | 0.0017          | 0.0044  | 0.0029  | 0.0035                       | 0.0014         | 0.0015          | 0.0033  | 0.0052  |
| 30 | Jabar     | Cirebon              | 0.0066                           | 0.0033         | 0.0017          | 0.0031  | 0.0057  | 0.0035                       | 0.0014         | 0.0015          | 0.0033  | 0.0052  |
| 31 | Jabar     | Garut                | 0.0018                           | 0.0013         | 0.0006          | 0.0044  | 0.0057  | 0.0018                       | 0.0006         | 0.0007          | 0.0074  | 0.0022  |
| 32 | Jabar     | Indramayu            | 0.0040                           | 0.0051         | 0.0017          | 0.0071  | 0.0057  | 0.0035                       | 0.0031         | 0.0022          | 0.0074  | 0.0052  |
| 33 | Jabar     | Karawang             | 0.0066                           | 0.0051         | 0.0017          | 0.0071  | 0.0070  | 0.0035                       | 0.0035         | 0.0026          | 0.0074  | 0.0052  |
| 34 | Jabar     | Kuningan             | 0.0018                           | 0.0033         | 0.0017          | 0.0044  | 0.0057  | 0.0035                       | 0.0014         | 0.0015          | 0.0074  | 0.0022  |
| 35 | Jabar     | Purwakarta           | 0.0040                           | 0.0038         | 0.0017          | 0.0044  | 0.0057  | 0.0035                       | 0.0031         | 0.0022          | 0.0033  | 0.0022  |
| 36 | Jabar     | Subang               | 0.0018                           | 0.0033         | 0.0017          | 0.0031  | 0.0029  | 0.0035                       | 0.0014         | 0.0022          | 0.0074  | 0.0052  |
| 37 | Jabar     | Sukabumi             | 0.0040                           | 0.0038         | 0.0017          | 0.0071  | 0.0057  | 0.0035                       | 0.0031         | 0.0022          | 0.0033  | 0.0022  |
| 38 | Jabar     | Sumedang             | 0.0018                           | 0.0006         | 0.0006          | 0.0031  | 0.0029  | 0.0018                       | 0.0014         | 0.0015          | 0.0033  | 0.0022  |
| 39 | Jabar     | Tasikmalaya          | 0.0018                           | 0.0033         | 0.0017          | 0.0031  | 0.0029  | 0.0018                       | 0.0014         | 0.0015          | 0.0074  | 0.0052  |
| 40 | Jateng    | Banyumas             | 0.0040                           | 0.0013         | 0.0006          | 0.0031  | 0.0057  | 0.0018                       | 0.0006         | 0.0007          | 0.0016  | 0.0052  |
| 41 | Jateng    | Boyolali             | 0.0040                           | 0.0033         | 0.0017          | 0.0031  | 0.0057  | 0.0018                       | 0.0006         | 0.0015          | 0.0033  | 0.0022  |
| 42 | Jateng    | Cilacap              | 0.0040                           | 0.0038         | 0.0017          | 0.0031  | 0.0057  | 0.0018                       | 0.0031         | 0.0015          | 0.0033  | 0.0052  |
| 43 | Jateng    | Jepara               | 0.0040                           | 0.0051         | 0.0017          | 0.0044  | 0.0057  | 0.0035                       | 0.0031         | 0.0022          | 0.0074  | 0.0052  |
| 44 | Jateng    | Karanganyar          | 0.0040                           | 0.0006         | 0.0006          | 0.0031  | 0.0057  | 0.0018                       | 0.0006         | 0.0022          | 0.0033  | 0.0022  |
| 45 | Jateng    | Kebumen              | 0.0040                           | 0.0013         | 0.0017          | 0.0031  | 0.0057  | 0.0018                       | 0.0014         | 0.0015          | 0.0033  | 0.0022  |
| 46 | Jateng    | Kendal               | 0.0040                           | 0.0033         | 0.0017          | 0.0031  | 0.0057  | 0.0018                       | 0.0014         | 0.0022          | 0.0033  | 0.0022  |
| 47 | Jateng    | Klaten               | 0.0040                           | 0.0033         | 0.0017          | 0.0044  | 0.0057  | 0.0035                       | 0.0014         | 0.0022          | 0.0074  | 0.0052  |
| 48 | Jateng    | Kudus                | 0.0066                           | 0.0038         | 0.0017          | 0.0071  | 0.0070  | 0.0035                       | 0.0014         | 0.0022          | 0.0074  | 0.0052  |
| 49 | Jateng    | Magelang             | 0.0040                           | 0.0033         | 0.0017          | 0.0031  | 0.0057  | 0.0018                       | 0.0014         | 0.0022          | 0.0033  | 0.0052  |
| 50 | Jateng    | Pekalongan           | 0.0040                           | 0.0051         | 0.0006          | 0.0044  | 0.0057  | 0.0018                       | 0.0031         | 0.0007          | 0.0074  | 0.0052  |
| 51 | Jateng    | Pemalang             | 0.0040                           | 0.0013         | 0.0006          | 0.0031  | 0.0057  | 0.0018                       | 0.0014         | 0.0007          | 0.0033  | 0.0022  |
| 52 | Jateng    | Sukoharjo            | 0.0040                           | 0.0013         | 0.0017          | 0.0031  | 0.0057  | 0.0018                       | 0.0014         | 0.0022          | 0.0033  | 0.0052  |
| 53 | Jateng    | Tegal                | 0.0040                           | 0.0033         | 0.0017          | 0.0031  | 0.0057  | 0.0018                       | 0.0014         | 0.0022          | 0.0033  | 0.0022  |
| 54 | Jateng    | Wonosobo             | 0.0040                           | 0.0006         | 0.0006          | 0.0031  | 0.0057  | 0.0018                       | 0.0006         | 0.0007          | 0.0016  | 0.0052  |

| NO  | PROPINSI | KABUPATEN            | FAKTOR INFRASTRUKTUR FISIK       |                |                 |         |         |                              |                |                 |         |         |
|-----|----------|----------------------|----------------------------------|----------------|-----------------|---------|---------|------------------------------|----------------|-----------------|---------|---------|
|     |          |                      | Ketersediaan Infrastruktur Fisik |                |                 |         |         | Kualitas Infrastruktur Fisik |                |                 |         |         |
|     |          |                      | Jalan                            | Pelabuhan Laut | Pelabuhan Udara | Listrik | Telepon | Jalan                        | Pelabuhan Laut | Pelabuhan Udara | Listrik | Telepon |
|     |          |                      | 0.0138                           | 0.0141         | 0.0058          | 0.016   | 0.0175  | 0.0095                       | 0.0089         | 0.0073          | 0.204   | 0.0139  |
| 55  | Jatim    | Bangkalan            | 0.0009                           | 0.0033         | 0.0017          | 0.0044  | 0.0057  | 0.0018                       | 0.0031         | 0.0015          | 0.0033  | 0.0052  |
| 56  | Jatim    | Banyuwangi           | 0.0040                           | 0.0038         | 0.0017          | 0.0044  | 0.0057  | 0.0018                       | 0.0031         | 0.0015          | 0.0074  | 0.0052  |
| 57  | Jatim    | Blitar               | 0.0066                           | 0.0018         | 0.0006          | 0.0071  | 0.0070  | 0.0035                       | 0.0006         | 0.0007          | 0.0074  | 0.0052  |
| 58  | Jatim    | Bondowoso            | 0.0040                           | 0.0033         | 0.0006          | 0.0031  | 0.0057  | 0.0018                       | 0.0014         | 0.0022          | 0.0033  | 0.0022  |
| 59  | Jatim    | Gresik               | 0.0066                           | 0.0051         | 0.0017          | 0.0071  | 0.0057  | 0.0035                       | 0.0031         | 0.0026          | 0.0074  | 0.0052  |
| 60  | Jatim    | Jember               | 0.0018                           | 0.0033         | 0.0017          | 0.0044  | 0.0029  | 0.0018                       | 0.0031         | 0.0015          | 0.0033  | 0.0022  |
| 61  | Jatim    | Jombang              | 0.0040                           | 0.0038         | 0.0017          | 0.0071  | 0.0057  | 0.0035                       | 0.0031         | 0.0022          | 0.0074  | 0.0052  |
| 62  | Jatim    | Kediri               | 0.0018                           | 0.0013         | 0.0017          | 0.0044  | 0.0057  | 0.0018                       | 0.0014         | 0.0015          | 0.0074  | 0.0052  |
| 63  | Jatim    | Lamongan             | 0.0040                           | 0.0051         | 0.0017          | 0.0044  | 0.0070  | 0.0035                       | 0.0031         | 0.0015          | 0.0074  | 0.0052  |
| 64  | Jatim    | Magetan              | 0.0040                           | 0.0018         | 0.0006          | 0.0031  | 0.0029  | 0.0035                       | 0.0014         | 0.0015          | 0.0033  | 0.0022  |
| 65  | Jatim    | Mojokerto            | 0.0040                           | 0.0051         | 0.0017          | 0.0071  | 0.0057  | 0.0035                       | 0.0031         | 0.0026          | 0.0074  | 0.0052  |
| 66  | Jatim    | Pamekasan            | 0.0018                           | 0.0038         | 0.0017          | 0.0044  | 0.0057  | 0.0018                       | 0.0031         | 0.0015          | 0.0033  | 0.0022  |
| 67  | Jatim    | Pasuruan             | 0.0066                           | 0.0038         | 0.0017          | 0.0071  | 0.0070  | 0.0035                       | 0.0031         | 0.0022          | 0.0074  | 0.0052  |
| 68  | Jatim    | Ponorogo             | 0.0018                           | 0.0033         | 0.0017          | 0.0031  | 0.0029  | 0.0018                       | 0.0014         | 0.0022          | 0.0033  | 0.0022  |
| 69  | Jatim    | Sidoarjo             | 0.0040                           | 0.0038         | 0.0017          | 0.0031  | 0.0029  | 0.0035                       | 0.0031         | 0.0026          | 0.0033  | 0.0052  |
| 70  | Jatim    | Situbondo            | 0.0018                           | 0.0033         | 0.0006          | 0.0031  | 0.0029  | 0.0018                       | 0.0014         | 0.0015          | 0.0033  | 0.0022  |
| 71  | Jatim    | Tulungagung          | 0.0018                           | 0.0013         | 0.0006          | 0.0044  | 0.0057  | 0.0035                       | 0.0014         | 0.0007          | 0.0074  | 0.0052  |
| 72  | Kalbar   | Kapuas Hulu          | 0.0005                           | 0.0033         | 0.0003          | 0.0010  | 0.0011  | 0.0006                       | 0.0014         | 0.0015          | 0.0033  | 0.0008  |
| 73  | Kalbar   | Ketapang             | 0.0005                           | 0.0038         | 0.0003          | 0.0010  | 0.0011  | 0.0003                       | 0.0031         | 0.0026          | 0.0016  | 0.0008  |
| 74  | Kalbar   | Pontianak            | 0.0009                           | 0.0051         | 0.0017          | 0.0031  | 0.0011  | 0.0018                       | 0.0031         | 0.0026          | 0.0033  | 0.0004  |
| 75  | Kalbar   | Sambas               | 0.0009                           | 0.0033         | 0.0003          | 0.0010  | 0.0011  | 0.0018                       | 0.0014         | 0.0003          | 0.0016  | 0.0008  |
| 76  | Kalbar   | Sanggau              | 0.0009                           | 0.0006         | 0.0003          | 0.0010  | 0.0007  | 0.0006                       | 0.0006         | 0.0003          | 0.0016  | 0.0008  |
| 77  | Kalsel   | Hulu Sungai Selatan  | 0.0018                           | 0.0038         | 0.0017          | 0.0031  | 0.0029  | 0.0018                       | 0.0031         | 0.0026          | 0.0033  | 0.0022  |
| 78  | Kalsel   | Hulu Sungai Tengah   | 0.0018                           | 0.0033         | 0.0017          | 0.0031  | 0.0029  | 0.0018                       | 0.0014         | 0.0022          | 0.0033  | 0.0022  |
| 79  | Kalsel   | Hulu Sungai Utara    | 0.0009                           | 0.0033         | 0.0017          | 0.0010  | 0.0029  | 0.0018                       | 0.0014         | 0.0015          | 0.0033  | 0.0008  |
| 80  | Kalsel   | Tabalong             | 0.0018                           | 0.0013         | 0.0017          | 0.0044  | 0.0029  | 0.0018                       | 0.0006         | 0.0015          | 0.0074  | 0.0052  |
| 81  | Kalsel   | Tanah Laut           | 0.0018                           | 0.0038         | 0.0017          | 0.0044  | 0.0029  | 0.0018                       | 0.0031         | 0.0022          | 0.0074  | 0.0052  |
| 82  | Kalsel   | Tapin                | 0.0005                           | 0.0033         | 0.0017          | 0.0005  | 0.0011  | 0.0003                       | 0.0014         | 0.0015          | 0.0008  | 0.0004  |
| 83  | Kalteng  | Barito Selatan       | 0.0009                           | 0.0006         | 0.0003          | 0.0010  | 0.0007  | 0.0003                       | 0.0003         | 0.0003          | 0.0033  | 0.0008  |
| 84  | Kalteng  | Barito Utara         | 0.0018                           | 0.0033         | 0.0003          | 0.0031  | 0.0029  | 0.0018                       | 0.0014         | 0.0015          | 0.0033  | 0.0008  |
| 85  | Kalteng  | Kapuas               | 0.0009                           | 0.0033         | 0.0003          | 0.0031  | 0.0029  | 0.0018                       | 0.0014         | 0.0015          | 0.0033  | 0.0008  |
| 86  | Kaltim   | Berau                | 0.0009                           | 0.0033         | 0.0003          | 0.0005  | 0.0007  | 0.0003                       | 0.0014         | 0.0022          | 0.0016  | 0.0004  |
| 87  | Kaltim   | Bulungan             | 0.0009                           | 0.0038         | 0.0017          | 0.0031  | 0.0007  | 0.0018                       | 0.0031         | 0.0026          | 0.0033  | 0.0004  |
| 88  | Kaltim   | Kutai                | 0.0009                           | 0.0033         | 0.0017          | 0.0031  | 0.0029  | 0.0018                       | 0.0014         | 0.0015          | 0.0033  | 0.0008  |
| 89  | Kaltim   | Kutai Timur          | 0.0005                           | 0.0006         | 0.0003          | 0.0005  | 0.0007  | 0.0003                       | 0.0003         | 0.0003          | 0.0008  | 0.0004  |
| 90  | Kaltim   | Nunukan              | 0.0005                           | 0.0038         | 0.0003          | 0.0031  | 0.0007  | 0.0018                       | 0.0031         | 0.0022          | 0.0033  | 0.0004  |
| 91  | Kaltim   | Pasir                | 0.0018                           | 0.0038         | 0.0017          | 0.0010  | 0.0007  | 0.0018                       | 0.0014         | 0.0015          | 0.0033  | 0.0008  |
| 92  | Lampung  | Lampung Barat        | 0.0018                           | 0.0033         | 0.0006          | 0.0031  | 0.0029  | 0.0018                       | 0.0014         | 0.0007          | 0.0033  | 0.0022  |
| 93  | Lampung  | Lampung Selatan      | 0.0009                           | 0.0038         | 0.0017          | 0.0031  | 0.0011  | 0.0006                       | 0.0031         | 0.0022          | 0.0033  | 0.0008  |
| 94  | Lampung  | Lampung Timur        | 0.0018                           | 0.0033         | 0.0017          | 0.0031  | 0.0029  | 0.0006                       | 0.0031         | 0.0015          | 0.0016  | 0.0008  |
| 95  | Lampung  | Lampung Utara        | 0.0005                           | 0.0033         | 0.0017          | 0.0005  | 0.0011  | 0.0003                       | 0.0014         | 0.0015          | 0.0008  | 0.0004  |
| 96  | Lampung  | Way Kanan            | 0.0018                           | 0.0006         | 0.0003          | 0.0031  | 0.0029  | 0.0018                       | 0.0003         | 0.0007          | 0.0033  | 0.0022  |
| 97  | NTB      | Bima                 | 0.0009                           | 0.0038         | 0.0017          | 0.0031  | 0.0029  | 0.0018                       | 0.0031         | 0.0022          | 0.0033  | 0.0022  |
| 98  | NTB      | Dompu                | 0.0009                           | 0.0033         | 0.0017          | 0.0031  | 0.0029  | 0.0006                       | 0.0031         | 0.0015          | 0.0033  | 0.0022  |
| 99  | NTB      | Lombok Barat         | 0.0018                           | 0.0038         | 0.0017          | 0.0031  | 0.0029  | 0.0018                       | 0.0031         | 0.0022          | 0.0033  | 0.0008  |
| 100 | NTB      | Lombok Timur         | 0.0018                           | 0.0038         | 0.0017          | 0.0031  | 0.0029  | 0.0035                       | 0.0031         | 0.0022          | 0.0033  | 0.0022  |
| 101 | NTT      | Belu                 | 0.0018                           | 0.0033         | 0.0006          | 0.0031  | 0.0011  | 0.0018                       | 0.0006         | 0.0007          | 0.0033  | 0.0008  |
| 102 | NTT      | Ende                 | 0.0018                           | 0.0038         | 0.0017          | 0.0010  | 0.0011  | 0.0018                       | 0.0014         | 0.0026          | 0.0033  | 0.0008  |
| 103 | NTT      | Flores Timur         | 0.0018                           | 0.0038         | 0.0006          | 0.0031  | 0.0029  | 0.0018                       | 0.0014         | 0.0015          | 0.0033  | 0.0022  |
| 104 | NTT      | Manggarai            | 0.0005                           | 0.0013         | 0.0017          | 0.0005  | 0.0007  | 0.0003                       | 0.0014         | 0.0015          | 0.0008  | 0.0004  |
| 105 | NTT      | Ngada                | 0.0005                           | 0.0033         | 0.0003          | 0.0005  | 0.0007  | 0.0003                       | 0.0014         | 0.0003          | 0.0008  | 0.0004  |
| 106 | NTT      | Sumba Barat          | 0.0009                           | 0.0033         | 0.0017          | 0.0005  | 0.0011  | 0.0006                       | 0.0014         | 0.0015          | 0.0016  | 0.0008  |
| 107 | NTT      | Timur Tengah Selatan | 0.0018                           | 0.0033         | 0.0017          | 0.0031  | 0.0029  | 0.0018                       | 0.0014         | 0.0015          | 0.0033  | 0.0022  |
| 108 | NTT      | Timur Tengah Utara   | 0.0018                           | 0.0013         | 0.0006          | 0.0031  | 0.0029  | 0.0018                       | 0.0006         | 0.0007          | 0.0033  | 0.0022  |

| NO  | PROPINSI | KABUPATEN             | FAKTOR INFRASTRUKTUR FISIK       |                |                 |         |         |                              |                |                 |         |         |
|-----|----------|-----------------------|----------------------------------|----------------|-----------------|---------|---------|------------------------------|----------------|-----------------|---------|---------|
|     |          |                       | Ketersediaan Infrastruktur Fisik |                |                 |         |         | Kualitas Infrastruktur Fisik |                |                 |         |         |
|     |          |                       | Jalan                            | Pelabuhan Laut | Pelabuhan Udara | Listrik | Telepon | Jalan                        | Pelabuhan Laut | Pelabuhan Udara | Listrik | Telepon |
|     |          |                       | 0.0138                           | 0.0141         | 0.0058          | 0.016   | 0.0175  | 0.0095                       | 0.0089         | 0.0073          | 0.204   | 0.0139  |
| 109 | Papua    | Fak-Fak               | 0.0009                           | 0.0013         | 0.0006          | 0.0005  | 0.0007  | 0.0003                       | 0.0014         | 0.0015          | 0.0008  | 0.0004  |
| 110 | Papua    | Jayawijaya            | 0.0009                           | 0.0033         | 0.0017          | 0.0010  | 0.0011  | 0.0006                       | 0.0014         | 0.0015          | 0.0033  | 0.0022  |
| 111 | Papua    | Manokwari             | 0.0018                           | 0.0033         | 0.0017          | 0.0010  | 0.0011  | 0.0018                       | 0.0014         | 0.0026          | 0.0016  | 0.0008  |
| 112 | Papua    | Mimika                | 0.0009                           | 0.0033         | 0.0017          | 0.0010  | 0.0011  | 0.0006                       | 0.0014         | 0.0015          | 0.0033  | 0.0022  |
| 113 | Papua    | Sorong                | 0.0005                           | 0.0033         | 0.0017          | 0.0010  | 0.0007  | 0.0003                       | 0.0014         | 0.0015          | 0.0016  | 0.0004  |
| 114 | Riau     | Bengkalis             | 0.0005                           | 0.0033         | 0.0003          | 0.0005  | 0.0007  | 0.0003                       | 0.0014         | 0.0003          | 0.0016  | 0.0008  |
| 115 | Riau     | Indragiri Hilir       | 0.0005                           | 0.0038         | 0.0003          | 0.0010  | 0.0007  | 0.0006                       | 0.0031         | 0.0007          | 0.0016  | 0.0004  |
| 116 | Riau     | Kampar                | 0.0018                           | 0.0033         | 0.0017          | 0.0005  | 0.0011  | 0.0018                       | 0.0014         | 0.0022          | 0.0016  | 0.0022  |
| 117 | Riau     | Kuantan Singingi      | 0.0005                           | 0.0006         | 0.0003          | 0.0010  | 0.0011  | 0.0003                       | 0.0003         | 0.0003          | 0.0016  | 0.0008  |
| 118 | Riau     | Pelalawan             | 0.0018                           | 0.0038         | 0.0017          | 0.0005  | 0.0007  | 0.0018                       | 0.0031         | 0.0015          | 0.0008  | 0.0008  |
| 119 | Riau     | Rokan Hulu            | 0.0005                           | 0.0006         | 0.0003          | 0.0005  | 0.0007  | 0.0003                       | 0.0006         | 0.0015          | 0.0008  | 0.0004  |
| 120 | Sulsel   | Bantaeng              | 0.0018                           | 0.0033         | 0.0017          | 0.0031  | 0.0011  | 0.0018                       | 0.0014         | 0.0015          | 0.0033  | 0.0022  |
| 121 | Sulsel   | Barru                 | 0.0040                           | 0.0038         | 0.0017          | 0.0005  | 0.0057  | 0.0035                       | 0.0031         | 0.0026          | 0.0008  | 0.0052  |
| 122 | Sulsel   | Bone                  | 0.0018                           | 0.0038         | 0.0017          | 0.0031  | 0.0029  | 0.0018                       | 0.0031         | 0.0022          | 0.0033  | 0.0022  |
| 123 | Sulsel   | Enrekang              | 0.0018                           | 0.0033         | 0.0017          | 0.0031  | 0.0029  | 0.0018                       | 0.0014         | 0.0022          | 0.0033  | 0.0022  |
| 124 | Sulsel   | Gowa                  | 0.0040                           | 0.0038         | 0.0017          | 0.0044  | 0.0057  | 0.0035                       | 0.0031         | 0.0022          | 0.0033  | 0.0052  |
| 125 | Sulsel   | Jeneponto             | 0.0018                           | 0.0038         | 0.0017          | 0.0031  | 0.0057  | 0.0018                       | 0.0031         | 0.0022          | 0.0033  | 0.0022  |
| 126 | Sulsel   | Luwu                  | 0.0018                           | 0.0038         | 0.0017          | 0.0005  | 0.0011  | 0.0018                       | 0.0014         | 0.0015          | 0.0008  | 0.0004  |
| 127 | Sulsel   | Luwu Utara            | 0.0018                           | 0.0038         | 0.0017          | 0.0031  | 0.0029  | 0.0018                       | 0.0031         | 0.0022          | 0.0033  | 0.0022  |
| 128 | Sulsel   | Majene                | 0.0040                           | 0.0038         | 0.0017          | 0.0031  | 0.0057  | 0.0035                       | 0.0031         | 0.0022          | 0.0033  | 0.0022  |
| 129 | Sulsel   | Maros                 | 0.0018                           | 0.0033         | 0.0017          | 0.0031  | 0.0029  | 0.0035                       | 0.0031         | 0.0026          | 0.0033  | 0.0022  |
| 130 | Sulsel   | Pangkep               | 0.0018                           | 0.0033         | 0.0017          | 0.0031  | 0.0057  | 0.0018                       | 0.0031         | 0.0022          | 0.0016  | 0.0022  |
| 131 | Sulsel   | Pinrang               | 0.0040                           | 0.0038         | 0.0017          | 0.0031  | 0.0057  | 0.0035                       | 0.0031         | 0.0022          | 0.0033  | 0.0022  |
| 132 | Sulsel   | Selayar               | 0.0018                           | 0.0033         | 0.0017          | 0.0031  | 0.0011  | 0.0003                       | 0.0031         | 0.0015          | 0.0033  | 0.0008  |
| 133 | Sulsel   | Sinjai                | 0.0040                           | 0.0038         | 0.0017          | 0.0031  | 0.0029  | 0.0035                       | 0.0031         | 0.0022          | 0.0033  | 0.0022  |
| 134 | Sulsel   | Takalar               | 0.0018                           | 0.0033         | 0.0017          | 0.0031  | 0.0057  | 0.0018                       | 0.0031         | 0.0022          | 0.0074  | 0.0052  |
| 135 | Sulsel   | Tana Toraja           | 0.0005                           | 0.0033         | 0.0006          | 0.0005  | 0.0011  | 0.0018                       | 0.0014         | 0.0015          | 0.0008  | 0.0022  |
| 136 | Sulteng  | Banggai               | 0.0018                           | 0.0033         | 0.0017          | 0.0031  | 0.0007  | 0.0018                       | 0.0031         | 0.0015          | 0.0033  | 0.0008  |
| 137 | Sulteng  | Donggala              | 0.0018                           | 0.0033         | 0.0017          | 0.0031  | 0.0007  | 0.0018                       | 0.0031         | 0.0015          | 0.0033  | 0.0008  |
| 138 | Sulteng  | Morowali              | 0.0005                           | 0.0033         | 0.0006          | 0.0005  | 0.0007  | 0.0003                       | 0.0014         | 0.0015          | 0.0016  | 0.0004  |
| 139 | Sulteng  | Poso                  | 0.0018                           | 0.0033         | 0.0017          | 0.0010  | 0.0029  | 0.0018                       | 0.0014         | 0.0007          | 0.0016  | 0.0004  |
| 140 | Sulteng  | Toli-Toli             | 0.0005                           | 0.0033         | 0.0017          | 0.0005  | 0.0007  | 0.0003                       | 0.0014         | 0.0003          | 0.0008  | 0.0004  |
| 141 | Sultra   | Buton                 | 0.0018                           | 0.0033         | 0.0017          | 0.0031  | 0.0029  | 0.0035                       | 0.0031         | 0.0015          | 0.0033  | 0.0022  |
| 142 | Sultra   | Kolaka                | 0.0018                           | 0.0033         | 0.0017          | 0.0031  | 0.0029  | 0.0035                       | 0.0031         | 0.0015          | 0.0033  | 0.0022  |
| 143 | Sulut    | Minahasa              | 0.0018                           | 0.0033         | 0.0017          | 0.0031  | 0.0029  | 0.0018                       | 0.0031         | 0.0015          | 0.0033  | 0.0022  |
| 144 | Sulut    | Sangihe               | 0.0018                           | 0.0033         | 0.0017          | 0.0031  | 0.0029  | 0.0018                       | 0.0031         | 0.0015          | 0.0033  | 0.0022  |
| 145 | Sumbar   | Pasaman               | 0.0005                           | 0.0006         | 0.0006          | 0.0005  | 0.0029  | 0.0003                       | 0.0006         | 0.0007          | 0.0008  | 0.0004  |
| 146 | Sumbar   | Pesisir Selatan       | 0.0040                           | 0.0038         | 0.0017          | 0.0031  | 0.0029  | 0.0035                       | 0.0031         | 0.0022          | 0.0033  | 0.0022  |
| 147 | Sumbar   | Sawah Lunto Sijunjung | 0.0040                           | 0.0038         | 0.0017          | 0.0031  | 0.0029  | 0.0035                       | 0.0031         | 0.0022          | 0.0016  | 0.0004  |
| 148 | Sumbar   | Solok                 | 0.0040                           | 0.0038         | 0.0017          | 0.0031  | 0.0029  | 0.0018                       | 0.0014         | 0.0022          | 0.0033  | 0.0022  |
| 149 | Sumsel   | Lahat                 | 0.0018                           | 0.0033         | 0.0017          | 0.0044  | 0.0029  | 0.0006                       | 0.0006         | 0.0015          | 0.0033  | 0.0008  |
| 150 | Sumsel   | Muara Enim            | 0.0009                           | 0.0006         | 0.0006          | 0.0031  | 0.0029  | 0.0006                       | 0.0006         | 0.0003          | 0.0033  | 0.0008  |
| 151 | Sumsel   | Musi Banyuasin        | 0.0018                           | 0.0033         | 0.0017          | 0.0031  | 0.0029  | 0.0018                       | 0.0031         | 0.0015          | 0.0033  | 0.0008  |
| 152 | Sumsel   | Musi Rawas            | 0.0005                           | 0.0006         | 0.0006          | 0.0031  | 0.0007  | 0.0018                       | 0.0006         | 0.0015          | 0.0033  | 0.0008  |
| 153 | Sumsel   | Ogan Kemiling Ilir    | 0.0018                           | 0.0033         | 0.0017          | 0.0031  | 0.0029  | 0.0035                       | 0.0031         | 0.0015          | 0.0033  | 0.0008  |
| 154 | Sumut    | Asahan                | 0.0018                           | 0.0038         | 0.0017          | 0.0044  | 0.0029  | 0.0018                       | 0.0031         | 0.0022          | 0.0033  | 0.0052  |
| 155 | Sumut    | Dairi                 | 0.0018                           | 0.0013         | 0.0017          | 0.0031  | 0.0029  | 0.0018                       | 0.0006         | 0.0007          | 0.0033  | 0.0022  |
| 156 | Sumut    | Deli Serdang          | 0.0018                           | 0.0033         | 0.0017          | 0.0031  | 0.0029  | 0.0018                       | 0.0014         | 0.0022          | 0.0033  | 0.0004  |
| 157 | Sumut    | Labuhan Batu          | 0.0009                           | 0.0033         | 0.0017          | 0.0044  | 0.0029  | 0.0018                       | 0.0014         | 0.0022          | 0.0074  | 0.0022  |
| 158 | Sumut    | Langkat               | 0.0018                           | 0.0033         | 0.0017          | 0.0044  | 0.0029  | 0.0018                       | 0.0014         | 0.0015          | 0.0033  | 0.0022  |
| 159 | Sumut    | Simalungun            | 0.0018                           | 0.0006         | 0.0003          | 0.0044  | 0.0029  | 0.0018                       | 0.0014         | 0.0015          | 0.0033  | 0.0022  |
| 160 | Sumut    | Tanah Karo            | 0.0018                           | 0.0033         | 0.0017          | 0.0031  | 0.0029  | 0.0018                       | 0.0014         | 0.0015          | 0.0074  | 0.0022  |
| 161 | Sumut    | Tapanuli Utara        | 0.0018                           | 0.0006         | 0.0003          | 0.0010  | 0.0029  | 0.0018                       | 0.0003         | 0.0003          | 0.0016  | 0.0022  |

**INTENSITAS INDIKATOR DATA SEKUNDER/Intensity of Secondary Indicators****Lampiran 13 : Variabel Keuangan Daerah/Regional Finance Variables****Lampiran 13.A : Variabel Keuangan Daerah 53 Kota/Regional Finance of 53 Cities**

| NO | PROPINSI  | KOTA             | Indikator Retribusi Terhadap Pajak |            |        | Indikator Retribusi Terhadap APBD |            |        |
|----|-----------|------------------|------------------------------------|------------|--------|-----------------------------------|------------|--------|
|    |           |                  | Rasio                              | Intensitas | Score  | Rasio                             | Intensitas | Score  |
| 1  | Sumut     | Binjai           | 159.05                             | KKRSD      | 0.0051 | 20.9                              | KKAR       | 0.0014 |
| 2  | Sumut     | Medan            | 73.84                              | KKRR       | 0.0083 | 27.5                              | KKASD      | 0.0023 |
| 3  | Sumut     | Pematang Siantar | 138.83                             | KKRSD      | 0.0051 | 37.4                              | KKAT       | 0.0037 |
| 4  | Sumut     | Sibolga          | 370.41                             | KKRST      | 0.0020 | 61.5                              | KKAST      | 0.0059 |
| 5  | Sumut     | Tanjung Balai    | 150.50                             | KKRSD      | 0.0051 | 35.1                              | KKASD      | 0.0023 |
| 6  | Sumut     | Tebing Tinggi    | 110.23                             | KKRR       | 0.0083 | 33.6                              | KKASD      | 0.0023 |
| 7  | Sumbar    | Padang           | 41.40                              | KKRSR      | 0.0132 | 14.0                              | KKASR      | 0.0009 |
| 8  | Sumbar    | Sawahlunto       | 258.14                             | KKRT       | 0.0031 | 27.1                              | KKASD      | 0.0023 |
| 9  | Riau      | Pekanbaru        | 106.40                             | KKRR       | 0.0083 | 31.7                              | KKASD      | 0.0023 |
| 10 | Riau      | Dumai            | 76.64                              | KKRR       | 0.0083 | 44.6                              | KKAST      | 0.0059 |
| 11 | Kep. Riau | Tanjung Pinang   | 30.38                              | KKRSR      | 0.0132 | NA                                |            |        |
| 12 | Kep. Riau | Batam            | 95.90                              | KKRR       | 0.0083 | 52.8                              | KKAST      | 0.0059 |
| 13 | Jambi     | Jambi            | 154.17                             | KKRSD      | 0.0051 | 14.8                              | KKASR      | 0.0009 |
| 14 | Sumsel    | Palembang        | 95.06                              | KKRR       | 0.0083 | 22.2                              | KKAR       | 0.0014 |
| 15 | Babel     | Pangkal Pinang   | 264.35                             | KKRT       | 0.0031 | 30.2                              | KKASD      | 0.0023 |
| 16 | Bengkulu  | Bengkulu         | 156.36                             | KKRSD      | 0.0051 | 17.1                              | KKAR       | 0.0014 |
| 17 | Lampung   | Bandar Lampung   | 51.77                              | KKRSR      | 0.0132 | 14.8                              | KKASR      | 0.0009 |
| 18 | Banten    | Cilegon          | 5.16                               | KKRSR      | 0.0132 | 33.5                              | KKASD      | 0.0023 |
| 19 | Banten    | Tangerang        | 43.11                              | KKRSR      | 0.0132 | 42.1                              | KKAT       | 0.0037 |
| 20 | DKI       | DKI Jakarta      | 8.11                               | KKRSR      | 0.0132 | 38.8                              | KKAT       | 0.0037 |
| 21 | Jabar     | Bekasi           | 118.78                             | KKRSD      | 0.0051 | 40.7                              | KKAT       | 0.0037 |
| 22 | Jabar     | Bogor            | 96.75                              | KKRR       | 0.0083 | 24.2                              | KKASD      | 0.0023 |
| 23 | Jabar     | Bandung          | 72.54                              | KKRR       | 0.0083 | 25.1                              | KKASD      | 0.0023 |
| 24 | Jabar     | Sukabumi         | 959.02                             | KKRST      | 0.0020 | 27.6                              | KKASD      | 0.0023 |
| 25 | Jabar     | Cirebon          | 135.27                             | KKRSD      | 0.0051 | 24.8                              | KKASD      | 0.0023 |
| 26 | Jateng    | Semarang         | 59.16                              | KKRR       | 0.0083 | 81.5                              | KKAST      | 0.0059 |
| 27 | Jateng    | Tegal            | 341.91                             | KKRST      | 0.0020 | 42.2                              | KKAT       | 0.0037 |
| 28 | Jateng    | Pekalongan       | 74.69                              | KKRR       | 0.0083 | 36.5                              | KKAT       | 0.0037 |
| 29 | Jateng    | Surakarta        | 102.53                             | KKRR       | 0.0083 | 15.6                              | KKASR      | 0.0009 |
| 30 | DIY       | Jogyakarta       | 62.88                              | KKRR       | 0.0083 | 9.8                               | KKASR      | 0.0009 |
| 31 | Jatim     | Kediri           | 98.28                              | KKRR       | 0.0083 | 20.0                              | KKAR       | 0.0014 |
| 32 | Jatim     | Malang           | 93.13                              | KKRR       | 0.0083 | 21.4                              | KKAR       | 0.0014 |
| 33 | Jatim     | Madiun           | 115.29                             | KKRSD      | 0.0051 | 55.4                              | KKAST      | 0.0059 |
| 34 | Jatim     | Mojokerto        | 157.48                             | KKRSD      | 0.0051 | 30.9                              | KKASD      | 0.0023 |
| 35 | Jatim     | Surabaya         | 61.96                              | KKRR       | 0.0083 | 22.4                              | KKAR       | 0.0014 |
| 36 | Jatim     | Probolinggo      | 257.17                             | KKRT       | 0.0031 | 33.3                              | KKASD      | 0.0023 |
| 37 | Bali      | Denpasar         | 43.31                              | KKRSR      | 0.0132 | 30.6                              | KKASD      | 0.0023 |
| 38 | Kalbar    | Pontianak        | 68.63                              | KKRR       | 0.0083 | 27.0                              | KKASD      | 0.0023 |
| 39 | Kalteng   | Palangkaraya     | 113.10                             | KKRSD      | 0.0051 | 25.4                              | KKASD      | 0.0023 |
| 40 | Kalsel    | Banjarmasin      | 63.05                              | KKRR       | 0.0083 | 17.1                              | KKAR       | 0.0014 |
| 41 | Kaltim    | Balikpapan       | 54.66                              | KKRSR      | 0.0132 | 51.9                              | KKAST      | 0.0059 |
| 42 | Kaltim    | Samarinda        | 154.83                             | KKRSD      | 0.0051 | 49.7                              | KKAST      | 0.0059 |
| 43 | Sulut     | Bitung           | 150.86                             | KKRSD      | 0.0051 | 32.2                              | KKASD      | 0.0023 |
| 44 | Sulut     | Manado           | 78.24                              | KKRR       | 0.0083 | 16.2                              | KKAR       | 0.0014 |
| 45 | Gorontalo | Gorontalo        | 371.73                             | KKRST      | 0.0020 | 29.2                              | KKASD      | 0.0023 |
| 46 | Sulteng   | Palu             | 6.65                               | KKRSR      | 0.0132 | 66.5                              | KKAST      | 0.0059 |
| 47 | Sultra    | Kendari          | 66.60                              | KKRR       | 0.0083 | 18.7                              | KKAR       | 0.0014 |
| 48 | Sulsel    | Makasar          | 82.02                              | KKRR       | 0.0083 | 14.3                              | KKASR      | 0.0009 |
| 49 | Sulsel    | Pare-Pare        | 399.29                             | KKRST      | 0.0020 | 27.5                              | KKASD      | 0.0023 |
| 50 | NTB       | Mataram          | 86.85                              | KKRR       | 0.0083 | 32.2                              | KKASD      | 0.0023 |
| 51 | NTT       | Kupang           | 62.91                              | KKRR       | 0.0083 | 14.8                              | KKASR      | 0.0009 |
| 52 | Iriabar   | Sorong           | 76.39                              | KKRR       | 0.0083 | 38.0                              | KKAT       | 0.0037 |
| 53 | Papua     | Jayapura         | 102.78                             | KKRR       | 0.0083 | 31.3                              | KKASD      | 0.0023 |

**Keterangan :****KKR** : Kelembagaan - Keuangan Daerah - Rasio Retribusi/Pajak**KKK** : Kelembagaan - Keuangan Daerah - Rasio Anggaran Pembangunan/APBDDibelakang **KKR/KKK** - **ST** : Sangat Tinggi**T** : Tinggi**SD** : Sedang**R** : Rendah**SR** : Sangat Rendah

Sumber : Data APBD Kabupaten / Kota di Indonesia th.2002, DJPKPD yang telah diolah.

|           |        |        |           |       |       |
|-----------|--------|--------|-----------|-------|-------|
| Rata-rata | 168.30 |        | Rata-rata | 29.56 |       |
| Standev   | 111.94 |        | Standev   | 13.43 |       |
| Skew      | 0.79   |        | Skew      | 0.77  |       |
| Kuortis   | (0.25) |        | Kuortis   | 0.19  |       |
| KKRST     | 280.24 |        | KKAST     | 42.99 |       |
| KKRT      | 224.27 | 280.24 | KKAT      | 36.28 | 42.99 |
| KKRSD     | 112.33 | 224.27 | KKASD     | 22.85 | 36.28 |
| KKRR      | 56.36  | 112.33 | KKAR      | 16.14 | 22.85 |
| KKRSR     |        | 56.36  | KKASR     |       | 16.14 |

**Lampiran 13.B : Variabel Keuangan Daerah 161 Kabupaten**  
*Regional Finance of 161 Regencies*

| NO | PROPINSI | KABUPATEN             | Indikator Retribusi Terhadap Pajak |            |        | Indikator Retribusi Terhadap APBD |            |        |
|----|----------|-----------------------|------------------------------------|------------|--------|-----------------------------------|------------|--------|
|    |          |                       | Rasio                              | Intensitas | Score  | Rasio                             | Intensitas | Score  |
| 1  | Sumut    | Asahan                | 22.0                               | KKRSR      | 0.0132 | 29.3                              | KKASD      | 0.0023 |
| 2  | Sumut    | Dairi                 | 288.8                              | KKRST      | 0.0020 | 28.6                              | KKASD      | 0.0023 |
| 3  | Sumut    | Deli Serdang          | 50.2                               | KKRSR      | 0.0132 | 18.8                              | KKAR       | 0.0014 |
| 4  | Sumut    | Simalungun            | 54.0                               | KKRSR      | 0.0132 | 31.3                              | KKASD      | 0.0023 |
| 5  | Sumut    | Tanah Karo            | 160.8                              | KKRSD      | 0.0051 | 22.2                              | KKAR       | 0.0014 |
| 6  | Sumut    | Labuhan Batu          | 100.9                              | KKRR       | 0.0083 | 23.1                              | KKASD      | 0.0023 |
| 7  | Sumut    | Langkat               | 42.8                               | KKRSR      | 0.0132 | 25.8                              | KKASD      | 0.0023 |
| 8  | Sumut    | Tapanuli Utara        | 447.6                              | KKRST      | 0.0020 | 31.5                              | KKASD      | 0.0023 |
| 9  | Sumbar   | Pesisir Selatan       | 341.4                              | KKRST      | 0.0020 | 21.6                              | KKAR       | 0.0014 |
| 10 | Sumbar   | Sawah Lunto Sijunjung | 212.4                              | KKRSD      | 0.0051 | 32.2                              | KKASD      | 0.0023 |
| 11 | Sumbar   | Pasaman               | 273.7                              | KKRT       | 0.0031 | 29.1                              | KKASD      | 0.0023 |
| 12 | Sumbar   | Solok                 | 148.2                              | KKRSD      | 0.0051 | 27.8                              | KKASD      | 0.0023 |
| 13 | Riau     | Bengkalis             | 22.9                               | KKRSR      | 0.0132 | 71.7                              | KKAST      | 0.0059 |
| 14 | Riau     | Indragiri Hilir       | 443.1                              | KKRST      | 0.0020 | 55.1                              | KKAST      | 0.0059 |
| 15 | Riau     | Kampar                | 165.9                              | KKRSD      | 0.0051 | 51.9                              | KKAST      | 0.0059 |
| 16 | Riau     | Kuantan Singingi      | 457.3                              | KKRST      | 0.0020 | 60.2                              | KKAST      | 0.0059 |
| 17 | Riau     | Pelalawan             | 43.2                               | KKRSR      | 0.0132 | 66.9                              | KKAST      | 0.0059 |
| 18 | Riau     | Rokan Hulu            | 369.7                              | KKRST      | 0.0020 | 48.6                              | KKAST      | 0.0059 |
| 19 | Jambi    | Batanghari            | 553.6                              | KKRST      | 0.0020 | 38.9                              | KKAT       | 0.0037 |
| 20 | Jambi    | Bungo                 | 769.8                              | KKRST      | 0.0020 | 28.3                              | KKASD      | 0.0023 |
| 21 | Jambi    | Kerinci               | 212.0                              | KKRSD      | 0.0051 | 28.7                              | KKASD      | 0.0023 |
| 22 | Jambi    | Tanjung Jabung Timur  | 240.9                              | KKRT       | 0.0031 | 39.8                              | KKAT       | 0.0037 |
| 23 | Jambi    | Tebo                  | 1,463.4                            | KKRST      | 0.0020 | 50.9                              | KKAST      | 0.0059 |
| 24 | Sumsel   | Muara Enim            | 24.7                               | KKRSR      | 0.0132 | 31.6                              | KKASD      | 0.0023 |
| 25 | Sumsel   | Musi Banyuasin        | 18.1                               | KKRSR      | 0.0132 | 49.1                              | KKAST      | 0.0059 |
| 26 | Sumsel   | Musi Rawas            | 281.0                              | KKRST      | 0.0020 | 44.7                              | KKAST      | 0.0059 |
| 27 | Sumsel   | Ogan Kemiling Ilir    | 136.7                              | KKRSD      | 0.0051 | 41.4                              | KKAT       | 0.0037 |
| 28 | Sumsel   | Lahat                 | 128.1                              | KKRSD      | 0.0051 | 21.3                              | KKAR       | 0.0014 |
| 29 | Babel    | Bangka                | 54.2                               | KKRSR      | 0.0132 | 40.8                              | KKAT       | 0.0037 |
| 30 | Babel    | Belitung              | 19.9                               | KKRSR      | 0.0132 | 16.6                              | KKAR       | 0.0014 |
| 31 | Bengkulu | Bengkulu Selatan      | 140.4                              | KKRSD      | 0.0051 | 16.0                              | KKASR      | 0.0009 |
| 32 | Bengkulu | Rejang Lebong         | 313.9                              | KKRST      | 0.0020 | 18.7                              | KKAR       | 0.0014 |
| 33 | Bengkulu | Bengkulu Utara        | 218.6                              | KKRSD      | 0.0051 | 17.5                              | KKAR       | 0.0014 |
| 34 | Lampung  | Lampung Barat         | 113.1                              | KKRSD      | 0.0051 | 37.5                              | KKAT       | 0.0037 |
| 35 | Lampung  | Lampung Selatan       | 159.1                              | KKRSD      | 0.0051 | 17.1                              | KKAR       | 0.0014 |
| 36 | Lampung  | Lampung Timur         | 115.8                              | KKRSD      | 0.0051 | 9.6                               | KKASR      | 0.0009 |
| 37 | Lampung  | Lampung Utara         | 177.8                              | KKRSD      | 0.0051 | 25.8                              | KKASD      | 0.0023 |
| 38 | Lampung  | Way Kanan             | 210.9                              | KKRSD      | 0.0051 | 51.7                              | KKAST      | 0.0059 |
| 39 | Banten   | Lebak                 | 799.0                              | KKRST      | 0.0020 | 29.8                              | KKASD      | 0.0023 |
| 40 | Banten   | Serang                | 145.7                              | KKRSD      | 0.0051 | 17.5                              | KKAR       | 0.0014 |
| 41 | Banten   | Tangerang             | 50.4                               | KKRSR      | 0.0132 | 32.4                              | KKASD      | 0.0023 |
| 42 | Jabar    | Bekasi                | 65.7                               | KKRR       | 0.0083 | 40.9                              | KKAT       | 0.0037 |
| 43 | Jabar    | Bogor                 | 58.7                               | KKRR       | 0.0083 | 29.3                              | KKASD      | 0.0023 |
| 44 | Jabar    | Ciamis                | 375.8                              | KKRST      | 0.0020 | 8.2                               | KKASR      | 0.0009 |
| 45 | Jabar    | Tasikmalaya           | 290.7                              | KKRST      | 0.0020 | 7.6                               | KKASR      | 0.0009 |
| 46 | Jabar    | Garut                 | 247.2                              | KKRT       | 0.0031 | 10.7                              | KKASR      | 0.0009 |
| 47 | Jabar    | Sumedang              | 145.9                              | KKRSD      | 0.0051 | 10.5                              | KKASR      | 0.0009 |
| 48 | Jabar    | Bandung               | 76.0                               | KKRR       | 0.0083 | 28.3                              | KKASD      | 0.0023 |
| 49 | Jabar    | Cianjur               | 200.8                              | KKRSD      | 0.0051 | 23.3                              | KKASD      | 0.0023 |
| 50 | Jabar    | Sukabumi              | 64.3                               | KKRR       | 0.0083 | 29.8                              | KKASD      | 0.0023 |
| 51 | Jabar    | Cirebon               | 112.1                              | KKRR       | 0.0083 | 23.8                              | KKASD      | 0.0023 |
| 52 | Jabar    | Kuningan              | 416.5                              | KKRST      | 0.0020 | 8.5                               | KKASR      | 0.0009 |
| 53 | Jabar    | Indramayu             | 67.6                               | KKRR       | 0.0083 | 28.4                              | KKASD      | 0.0023 |
| 54 | Jabar    | Purwakarta            | 113.1                              | KKRSD      | 0.0051 | 19.3                              | KKAR       | 0.0014 |
| 55 | Jabar    | Karawang              | 197.6                              | KKRSD      | 0.0051 | 30.3                              | KKASD      | 0.0023 |
| 56 | Jabar    | Subang                | 280.7                              | KKRST      | 0.0020 | 21.2                              | KKAR       | 0.0014 |
| 57 | Jateng   | Kendal                | 126.3                              | KKRSD      | 0.0051 | 5.8                               | KKASR      | 0.0009 |
| 58 | Jateng   | Pekalongan            | 116.2                              | KKRSD      | 0.0051 | 20.7                              | KKAR       | 0.0014 |
| 59 | Jateng   | Pemalang              | 228.5                              | KKRT       | 0.0031 | 15.3                              | KKASR      | 0.0009 |



| NO  | PROPINSI | KABUPATEN           | Indikator Retribusi Terhadap Pajak |            |        | Indikator Retribusi Terhadap APBD |            |        |
|-----|----------|---------------------|------------------------------------|------------|--------|-----------------------------------|------------|--------|
|     |          |                     | Rasio                              | Intensitas | Score  | Rasio                             | Intensitas | Score  |
| 60  | Jateng   | Tegal               | 270.6                              | KKRT       | 0.0031 | 27.1                              | KKASD      | 0.0023 |
| 61  | Jateng   | Jepara              | 309.2                              | KKRST      | 0.0020 | 27.3                              | KKASD      | 0.0023 |
| 62  | Jateng   | Kudus               | 324.6                              | KKRST      | 0.0020 | 33.8                              | KKASD      | 0.0023 |
| 63  | Jateng   | Banyumas            | 279.1                              | KKRT       | 0.0031 | 12.7                              | KKASR      | 0.0009 |
| 64  | Jateng   | Cilacap             | 88.2                               | KKRR       | 0.0083 | 17.4                              | KKAR       | 0.0014 |
| 65  | Jateng   | Wonosobo            | 435.4                              | KKRST      | 0.0020 | 19.5                              | KKAR       | 0.0014 |
| 66  | Jateng   | Kebumen             | 248.7                              | KKRT       | 0.0031 | 16.2                              | KKAR       | 0.0014 |
| 67  | Jateng   | Boyolali            | 411.1                              | KKRST      | 0.0020 | 13.6                              | KKASR      | 0.0009 |
| 68  | Jateng   | Sukoharjo           | 88.1                               | KKRR       | 0.0083 | 11.8                              | KKASR      | 0.0009 |
| 69  | Jateng   | Karanganyar         | 144.2                              | KKRSD      | 0.0051 | 14.9                              | KKASR      | 0.0009 |
| 70  | Jateng   | Klaten              | 109.8                              | KKRR       | 0.0083 | 10.0                              | KKASR      | 0.0009 |
| 71  | Jateng   | Magelang            | 83.7                               | KKRR       | 0.0083 | 23.1                              | KKASD      | 0.0023 |
| 72  | DIY      | Bantul              | 296.9                              | KKRST      | 0.0020 | 15.8                              | KKASR      | 0.0009 |
| 73  | DIY      | Gunung Kidul        | 554.2                              | KKRST      | 0.0020 | 16.3                              | KKAR       | 0.0014 |
| 74  | Jatim    | Blitar              | 192.5                              | KKRSD      | 0.0051 | 8.3                               | KKASR      | 0.0009 |
| 75  | Jatim    | Kediri              | 155.9                              | KKRSD      | 0.0051 | 17.2                              | KKAR       | 0.0014 |
| 76  | Jatim    | Magetan             | 147.7                              | KKRSD      | 0.0051 | 16.2                              | KKAR       | 0.0014 |
| 77  | Jatim    | Ponorogo            | 216.6                              | KKRSD      | 0.0051 | 21.9                              | KKAR       | 0.0014 |
| 78  | Jatim    | Tulungagung         | 216.0                              | KKRSD      | 0.0051 | 17.4                              | KKAR       | 0.0014 |
| 79  | Jatim    | Mojokerto           | 91.9                               | KKRR       | 0.0083 | 21.0                              | KKAR       | 0.0014 |
| 80  | Jatim    | Pamekasan           | 276.3                              | KKRT       | 0.0031 | 19.1                              | KKAR       | 0.0014 |
| 81  | Jatim    | Bangkalan           | 234.5                              | KKRT       | 0.0031 | 21.6                              | KKAR       | 0.0014 |
| 82  | Jatim    | Pasuruan            | 45.0                               | KKRSR      | 0.0132 | 26.5                              | KKASD      | 0.0023 |
| 83  | Jatim    | Sidoarjo            | 139.5                              | KKRSD      | 0.0051 | 23.7                              | KKASD      | 0.0023 |
| 84  | Jatim    | Gresik              | 30.0                               | KKRSR      | 0.0132 | 20.9                              | KKAR       | 0.0014 |
| 85  | Jatim    | Jombang             | 128.5                              | KKRSD      | 0.0051 | 28.2                              | KKASD      | 0.0023 |
| 86  | Jatim    | Lamongan            | 155.9                              | KKRSD      | 0.0051 | 22.0                              | KKAR       | 0.0014 |
| 87  | Jatim    | Banyuwangi          | 150.8                              | KKRSD      | 0.0051 | 19.9                              | KKAR       | 0.0014 |
| 88  | Jatim    | Bondowoso           | 124.2                              | KKRSD      | 0.0051 | 10.4                              | KKASR      | 0.0009 |
| 89  | Jatim    | Situbondo           | 81.6                               | KKRR       | 0.0083 | 27.8                              | KKASD      | 0.0023 |
| 90  | Jatim    | Jember              | 273.0                              | KKRT       | 0.0031 | 28.3                              | KKASD      | 0.0023 |
| 91  | Bali     | Badung              | 1.5                                | KKRSR      | 0.0132 | 53.2                              | KKAST      | 0.0059 |
| 92  | Bali     | Bangli              | 231.2                              | KKRT       | 0.0031 | 22.8                              | KKAR       | 0.0014 |
| 93  | Bali     | Buleleng            | 77.1                               | KKRR       | 0.0083 | 15.4                              | KKASR      | 0.0009 |
| 94  | Bali     | Gianyar             | 35.8                               | KKRSR      | 0.0132 | 39.3                              | KKAT       | 0.0037 |
| 95  | Bali     | Jembrana            | 240.6                              | KKRT       | 0.0031 | 12.8                              | KKASR      | 0.0009 |
| 96  | Bali     | Tabanan             | 114.3                              | KKRSD      | 0.0051 | 28.0                              | KKASD      | 0.0023 |
| 97  | Bali     | Klungkung           | 164.8                              | KKRSD      | 0.0051 | NA                                |            |        |
| 98  | Bali     | Karangasem          | 21.1                               | KKRSR      | 0.0132 | 30.7                              | KKASD      | 0.0023 |
| 99  | Kalbar   | Kapuas Hulu         | 363.5                              | KKRST      | 0.0020 | 40.1                              | KKAT       | 0.0037 |
| 100 | Kalbar   | Ketapang            | 218.5                              | KKRSD      | 0.0051 | 43.3                              | KKAST      | 0.0059 |
| 101 | Kalbar   | Pontianak           | 35.8                               | KKRSR      | 0.0132 | 21.0                              | KKAR       | 0.0014 |
| 102 | Kalbar   | Sambas              | 251.2                              | KKRT       | 0.0031 | 32.3                              | KKASD      | 0.0023 |
| 103 | Kalbar   | Sanggau             | 127.8                              | KKRSD      | 0.0051 | 28.0                              | KKASD      | 0.0023 |
| 104 | Kalteng  | Barito Selatan      | 158.5                              | KKRSD      | 0.0051 | 65.9                              | KKAST      | 0.0059 |
| 105 | Kalteng  | Barito Utara        | 208.5                              | KKRSD      | 0.0051 | 45.0                              | KKAST      | 0.0059 |
| 106 | Kalteng  | Kapuas              | 128.6                              | KKRSD      | 0.0051 | 35.4                              | KKASD      | 0.0023 |
| 107 | Kalsel   | Hulu Sungai Selatan | 347.3                              | KKRST      | 0.0020 | 30.4                              | KKASD      | 0.0023 |
| 108 | Kalsel   | Hulu Sungai Tengah  | 224.1                              | KKRT       | 0.0031 | 30.6                              | KKASD      | 0.0023 |
| 109 | Kalsel   | Hulu Sungai Utara   | 116.6                              | KKRSD      | 0.0051 | 25.6                              | KKASD      | 0.0023 |
| 110 | Kalsel   | Tabalong            | 8.0                                | KKRSR      | 0.0132 | 30.8                              | KKASD      | 0.0023 |
| 111 | Kalsel   | Tanah Laut          | 177.5                              | KKRSD      | 0.0051 | 30.0                              | KKASD      | 0.0023 |
| 112 | Kalsel   | Tapin               | 47.8                               | KKRSR      | 0.0132 | 22.0                              | KKAR       | 0.0014 |
| 113 | Kaltim   | Berau               | 99.3                               | KKRR       | 0.0083 | 56.7                              | KKAST      | 0.0059 |
| 114 | Kaltim   | Kutai               | 71.6                               | KKRR       | 0.0083 | 64.3                              | KKAST      | 0.0059 |
| 115 | Kaltim   | Pasir               | 52.3                               | KKRSR      | 0.0132 | 60.5                              | KKAST      | 0.0059 |
| 116 | Kaltim   | Bulungan            | 206.6                              | KKRSD      | 0.0051 | 51.6                              | KKAST      | 0.0059 |
| 117 | Kaltim   | Kutai Timur         | 55.2                               | KKRSR      | 0.0132 | 65.5                              | KKAST      | 0.0059 |
| 118 | Kaltim   | Nunukan             | 185.9                              | KKRSD      | 0.0051 | 62.5                              | KKAST      | 0.0059 |

| NO  | PROPINSI  | KABUPATEN            | Indikator Retribusi Terhadap Pajak |            |        | Indikator Retribusi Terhadap APBD |            |        |
|-----|-----------|----------------------|------------------------------------|------------|--------|-----------------------------------|------------|--------|
|     |           |                      | Rasio                              | Intensitas | Score  | Rasio                             | Intensitas | Score  |
| 119 | Sulut     | Minahasa             | 179.4                              | KKRSD      | 0.0051 | -                                 | KKASR      | 0.0009 |
| 120 | Sulut     | Sangihe              | 436.1                              | KKRST      | 0.0020 | 10.4                              | KKASR      | 0.0009 |
| 121 | Gorontalo | Gorontalo            | 363.9                              | KKRST      | 0.0020 | 21.2                              | KKAR       | 0.0014 |
| 122 | Sulteng   | Banggai              | 132.2                              | KKRSD      | 0.0051 | 29.1                              | KKASD      | 0.0023 |
| 123 | Sulteng   | Toli-Toli            | 9.5                                | KKRSR      | 0.0132 | 33.3                              | KKASD      | 0.0023 |
| 124 | Sulteng   | Donggala             | 91.7                               | KKRR       | 0.0083 | 1.2                               | KKASR      | 0.0009 |
| 125 | Sulteng   | Morowali             | 256.2                              | KKRT       | 0.0031 | 36.5                              | KKAT       | 0.0037 |
| 126 | Sulteng   | Poso                 | 295.1                              | KKRST      | 0.0020 | 32.2                              | KKASD      | 0.0023 |
| 127 | Sultra    | Buton                | 449.5                              | KKRST      | 0.0020 | 24.7                              | KKASD      | 0.0023 |
| 128 | Sultra    | Kolaka               | 66.5                               | KKRR       | 0.0083 | 28.2                              | KKASD      | 0.0023 |
| 129 | Sulsel    | Gowa                 | 114.9                              | KKRSD      | 0.0051 | 29.8                              | KKASD      | 0.0023 |
| 130 | Sulsel    | Takalar              | 270.8                              | KKRT       | 0.0031 | 19.4                              | KKAR       | 0.0014 |
| 131 | Sulsel    | Jeneponto            | 308.3                              | KKRST      | 0.0020 | 25.7                              | KKASD      | 0.0023 |
| 132 | Sulsel    | Bantaeng             | 298.6                              | KKRST      | 0.0020 | 37.7                              | KKAT       | 0.0037 |
| 133 | Sulsel    | Sinjai               | 493.4                              | KKRST      | 0.0020 | 25.7                              | KKASD      | 0.0023 |
| 134 | Sulsel    | Selayar              | 145.7                              | KKRSD      | 0.0051 | 39.5                              | KKAT       | 0.0037 |
| 135 | Sulsel    | Bone                 | 333.0                              | KKRST      | 0.0020 | 8.6                               | KKASR      | 0.0009 |
| 136 | Sulsel    | Maros                | 71.7                               | KKRR       | 0.0083 | 34.7                              | KKASD      | 0.0023 |
| 137 | Sulsel    | Pangkep              | 25.8                               | KKRSR      | 0.0132 | 37.3                              | KKAT       | 0.0037 |
| 138 | Sulsel    | Barru                | 163.2                              | KKRSD      | 0.0051 | 37.4                              | KKAT       | 0.0037 |
| 139 | Sulsel    | Pinrang              | 147.3                              | KKRSD      | 0.0051 | 27.4                              | KKASD      | 0.0023 |
| 140 | Sulsel    | Majene               | 165.7                              | KKRSD      | 0.0051 | 32.2                              | KKASD      | 0.0023 |
| 141 | Sulsel    | Enrekang             | 118.6                              | KKRSD      | 0.0051 | 34.4                              | KKASD      | 0.0023 |
| 142 | Sulsel    | Tana Toraja          | 152.4                              | KKRSD      | 0.0051 | 26.5                              | KKASD      | 0.0023 |
| 143 | Sulsel    | Luwu                 | 428.7                              | KKRST      | 0.0020 | 27.6                              | KKASD      | 0.0023 |
| 144 | Sulsel    | Luwu Utara           | 26.6                               | KKRSR      | 0.0132 | 34.4                              | KKASD      | 0.0023 |
| 145 | NTB       | Bima                 | 74.6                               | KKRR       | 0.0083 | 21.1                              | KKAR       | 0.0014 |
| 146 | NTB       | Lombok Timur         | 444.4                              | KKRST      | 0.0020 | 29.5                              | KKASD      | 0.0023 |
| 147 | NTB       | Dompu                | 177.0                              | KKRSD      | 0.0051 | 26.7                              | KKASD      | 0.0023 |
| 148 | NTB       | Lombok Barat         | 31.5                               | KKRSR      | 0.0132 | 18.4                              | KKAR       | 0.0014 |
| 149 | NTT       | Ende                 | 240.7                              | KKRT       | 0.0031 | 17.0                              | KKAR       | 0.0014 |
| 150 | NTT       | Flores Timur         | 219.0                              | KKRSD      | 0.0051 | 31.9                              | KKASD      | 0.0023 |
| 151 | NTT       | Manggarai            | 245.8                              | KKRT       | 0.0031 | 24.4                              | KKASD      | 0.0023 |
| 152 | NTT       | Ngada                | 397.1                              | KKRST      | 0.0020 | 31.8                              | KKASD      | 0.0023 |
| 153 | NTT       | Timur Tengah Selatan | 287.6                              | KKRST      | 0.0020 | 36.3                              | KKAT       | 0.0037 |
| 154 | NTT       | Timur Tengah Utara   | 321.9                              | KKRST      | 0.0020 | 36.6                              | KKAT       | 0.0037 |
| 155 | NTT       | Belu                 | 108.2                              | KKRR       | 0.0083 | 28.3                              | KKASD      | 0.0023 |
| 156 | NTT       | Sumba Barat          | 321.6                              | KKRST      | 0.0020 | 33.9                              | KKASD      | 0.0023 |
| 157 | Irjabar   | Fak-Fak              | 79.1                               | KKRR       | 0.0083 | 30.5                              | KKASD      | 0.0023 |
| 158 | Irjabar   | Manokwari            | 184.3                              | KKRSD      | 0.0051 | 44.7                              | KKAST      | 0.0059 |
| 159 | Irjabar   | Sorong               | 710.2                              | KKRST      | 0.0020 | 24.8                              | KKASD      | 0.0023 |
| 160 | Papua     | Jayawijaya           | 207.2                              | KKRSD      | 0.0051 | 42.9                              | KKAT       | 0.0037 |
| 161 | Irjabar   | Mimika               | 15.8                               | KKRSR      | 0.0132 | 42.4                              | KKAT       | 0.0037 |

**Keterangan :****KKR** : Kelembagaan - Keuangan Daerah - Rasio Retribusi/Pajak**KKR** : Kelembagaan - Keuangan Daerah - Rasio Anggaran Pembangunan/APBDDibelakang **KKR/KA** - **ST** : Sangat Tinggi**T** : Tinggi**SD** : Sedang**R** : Rendah**SR** : Sangat Rendah

Sumber : Data APBD Kabupaten / Kota di Indonesia th.2002, DJPKPD yang telah diolah.

|           |        |        |           |       |       |
|-----------|--------|--------|-----------|-------|-------|
| Rata-rata | 168.30 |        | Rata-rata | 29.56 |       |
| Standev   | 111.94 |        | Standev   | 13.43 |       |
| Skew      | 0.79   |        | Skew      | 0.77  |       |
| Kuortis   | (0.25) |        | Kuortis   | 0.19  |       |
| KKRST     | 280.24 |        | KKAST     | 42.99 |       |
| KKRT      | 224.27 | 280.24 | KKAT      | 36.28 | 42.99 |
| KKRSD     | 112.33 | 224.27 | KKASD     | 22.85 | 36.28 |
| KKRR      | 56.36  | 112.33 | KKAR      | 16.14 | 22.85 |
| KKRSR     |        | 56.36  | KKASR     |       | 16.14 |

**Lampiran 14 : Faktor Ekonomi Daerah/Regional Economic Dynamism****Lampiran 14.1 : Variabel Potensi Ekonomi/Economic Potential****Lampiran 14.1.A : Variabel Potensi Ekonomi 53 Kota/Economic Potential of 53 Cities**

| NO | PROPINSI  | KOTA             | Indikator PDRB Perkapita (Tanpa Migas) |            |        | Indikator IPM |            |        |
|----|-----------|------------------|----------------------------------------|------------|--------|---------------|------------|--------|
|    |           |                  | PDRB Perkapita 2003                    | Intensitas | Score  | IPM 2002      | Intensitas | Score  |
| 1  | Sumut     | Binjai           | 5,653,730.46                           | EPPSD      | 0.0062 | 71.6          | EPIT       | 0.0079 |
| 2  | Sumut     | Medan            | 10,978,428.71                          | EPPST      | 0.0247 | 73.5          | EPIT       | 0.0079 |
| 3  | Sumut     | Pematang Siantar | 11,061,995.71                          | EPPST      | 0.0247 | 74.1          | EPIT       | 0.0079 |
| 4  | Sumut     | Sibolga          | 7,060,866.73                           | EPPT       | 0.0126 | 70.7          | EPISD      | 0.0051 |
| 5  | Sumut     | Tanjung Balai    | 8,847,791.33                           | EPPST      | 0.0247 | 67.8          | EPISD      | 0.0051 |
| 6  | Sumut     | Tebing Tinggi    | 7,431,762.64                           | EPPT       | 0.0126 | 71.6          | EPIT       | 0.0079 |
| 7  | Sumbar    | Padang           | 13,421,682.83                          | EPPST      | 0.0247 | 73.2          | EPIT       | 0.0079 |
| 8  | Sumbar    | Sawahlunto       | 10,464,928.70                          | EPPST      | 0.0247 | 70.8          | EPIT       | 0.0079 |
| 9  | Riau      | Pekanbaru        | 7,008,889.48                           | EPPT       | 0.0126 | 73.4          | EPIT       | 0.0079 |
| 10 | Riau      | Dumai            | 4,930,547.20                           | EPPSD      | 0.0062 | 71.5          | EPIT       | 0.0079 |
| 11 | Kep. Riau | Tanjung Pinang   | 8,284,725.82                           | EPPST      | 0.0247 | 69.1          | EPISD      | 0.0051 |
| 12 | Kep. Riau | Batam            | 17,053,694.82                          | EPPST      | 0.0247 | 73.2          | EPIT       | 0.0079 |
| 13 | Jambi     | Jambi            | 6,183,619.98                           | EPPSD      | 0.0062 | 71.4          | EPIT       | 0.0079 |
| 14 | Sumsel    | Palembang        | 9,639,451.14                           | EPPST      | 0.0247 | 71.2          | EPIT       | 0.0079 |
| 15 | Babel     | Pangkal Pinang   | 6,569,276.62                           | EPPSD      | 0.0062 | 69.6          | EPISD      | 0.0051 |
| 16 | Bengkulu  | Bengkulu         | 6,661,451.24                           | EPPSD      | 0.0062 | 72.7          | EPIT       | 0.0079 |
| 17 | Lampung   | Bandar Lampung   | 8,427,737.72                           | EPPST      | 0.0247 | 70.5          | EPISD      | 0.0051 |
| 18 | Banten    | Cilegon          | 30,610,025.32                          | EPPST      | 0.0247 | 68.4          | EPISD      | 0.0051 |
| 19 | Banten    | Tangerang        | 16,212,848.18                          | EPPST      | 0.0247 | 72.2          | EPIT       | 0.0079 |
| 20 | DKI       | Jakarta          | 32,869,698.03                          | EPPST      | 0.0247 | 75.6          | EPIST      | 0.0086 |
| 21 | Jabar     | Bekasi           | 6,450,895.55                           | EPPSD      | 0.0062 | 72.8          | EPIT       | 0.0079 |
| 22 | Jabar     | Bogor            | 4,462,727.02                           | EPPSD      | 0.0062 | 71.9          | EPIT       | 0.0079 |
| 23 | Jabar     | Bandung          | 10,496,936.77                          | EPPST      | 0.0247 | 73.0          | EPIT       | 0.0079 |
| 24 | Jabar     | Sukabumi         | 5,735,910.57                           | EPPSD      | 0.0062 | 69.2          | EPISD      | 0.0051 |
| 25 | Jabar     | Cirebon          | 19,536,606.39                          | EPPST      | 0.0247 | 69.2          | EPISD      | 0.0051 |
| 26 | Jateng    | Semarang         | 13,718,473.20                          | EPPST      | 0.0247 | 73.6          | EPIT       | 0.0079 |
| 27 | Jateng    | Tegal            | 4,939,501.16                           | EPPSD      | 0.0062 | 68.5          | EPISD      | 0.0051 |
| 28 | Jateng    | Pekalongan       | 7,073,279.64                           | EPPT       | 0.0126 | 68.2          | EPISD      | 0.0051 |
| 29 | Jateng    | Surakarta        | 8,485,229.80                           | EPPST      | 0.0247 | 73.0          | EPIT       | 0.0079 |
| 30 | DIY       | Yogyakarta       | 11,852,832.67                          | EPPST      | 0.0247 | 75.3          | EPIST      | 0.0086 |
| 31 | Jatim     | Kediri           | 87,257,031.37                          | EPPST      | 0.0247 | 70.8          | EPIT       | 0.0079 |
| 32 | Jatim     | Malang           | 12,175,345.92                          | EPPST      | 0.0247 | 71.4          | EPIT       | 0.0079 |
| 33 | Jatim     | Madiun           | 6,041,196.12                           | EPPSD      | 0.0062 | 70.7          | EPISD      | 0.0051 |
| 34 | Jatim     | Mojoekerto       | 7,681,666.75                           | EPPT       | 0.0126 | 72.8          | EPIT       | 0.0079 |
| 35 | Jatim     | Surabaya         | 22,788,011.11                          | EPPST      | 0.0247 | 72.0          | EPIT       | 0.0079 |
| 36 | Jatim     | Probolinggo      | 7,607,712.93                           | EPPT       | 0.0126 | 67.7          | EPISD      | 0.0051 |
| 37 | Bali      | Denpasar         | 8,956,571.50                           | EPPST      | 0.0247 | 74.9          | EPIT       | 0.0079 |
| 38 | Kalbar    | Pontianak        | 12,354,349.51                          | EPPST      | 0.0247 | 67.6          | EPISD      | 0.0051 |
| 39 | Kalteng   | Palangkaraya     | 6,888,981.49                           | EPPT       | 0.0126 | 74.2          | EPIT       | 0.0079 |
| 40 | Kalsel    | Banjarmasin      | 3,530,482.94                           | EPPR       | 0.0030 | 69.2          | EPISD      | 0.0051 |
| 41 | Kaltim    | Balikpapan       | 19,568,473.23                          | EPPST      | 0.0247 | 73.0          | EPIT       | 0.0079 |
| 42 | Kaltim    | Samarinda        | 17,270,930.92                          | EPPST      | 0.0247 | 72.6          | EPIT       | 0.0079 |
| 43 | Sulut     | Bitung           | 8,755,154.10                           | EPPST      | 0.0247 | 70.7          | EPISD      | 0.0051 |
| 44 | Sulut     | Manado           | 7,974,953.02                           | EPPT       | 0.0126 | 74.2          | EPIT       | 0.0079 |
| 45 | Gorontalo | Gorontalo        | 3,799,207.15                           | EPPR       | 0.0030 | 67.8          | EPISD      | 0.0051 |
| 46 | Sulteng   | Palu             | 6,813,889.71                           | EPPT       | 0.0126 | 70.5          | EPISD      | 0.0051 |
| 47 | Sultra    | Kendari          | 6,086,160.42                           | EPPSD      | 0.0062 | 70.5          | EPISD      | 0.0051 |
| 48 | Sulsel    | Makasar          | 8,650,103.55                           | EPPST      | 0.0247 | 73.9          | EPIT       | 0.0079 |
| 49 | Sulsel    | Pare Pare        | 5,296,298.88                           | EPPSD      | 0.0062 | 72.3          | EPIT       | 0.0079 |
| 50 | NTB       | Mataram          | 4,428,548.62                           | EPPSD      | 0.0062 | 65.2          | EPISD      | 0.0051 |
| 51 | NTT       | Kupang           | 7,005,344.63                           | EPPT       | 0.0126 | 70.9          | EPIT       | 0.0079 |
| 52 | Irjabar   | Sorong           | 4,179,947.96                           | EPPSD      | 0.0062 | 73.0          | EPIT       | 0.0079 |
| 53 | Papua     | Jayapura         | 7,888,773.11                           | EPPT       | 0.0126 | 71.4          | EPIT       | 0.0079 |

**Keterangan :**

EPP : Ekonomi Daerah - Potensi Ekonomi - PDRB Perkapita

EPI : Ekonomi Daerah - Potensi Ekonomi - IPM

Dibelakang EPP/EPI - ST : Sangat Tinggi

T : Tinggi

SD : Sedang

R : Rendah

SR : Sangat Rendah

Sumber : BPS Pusat, yang telah diolah.

Rata-rata PDRB Perkapita Kota : 11,417,446.80 IPM Indonesia : 65.8

|       |              |              |       |      |      |
|-------|--------------|--------------|-------|------|------|
| EPPST | 8,013,324.44 | -            | EPIST | 75.2 | -    |
| EPPT  | 6,681,746.92 | 8,013,324.44 | EPIT  | 70.8 | 75.2 |
| EPPSD | 4,018,591.87 | 6,681,746.92 | EPISD | 61.9 | 70.8 |
| EPPR  | 2,687,014.34 | 4,018,591.87 | EPIR  | 57.4 | 61.9 |
| EPPSR | -            | 2,687,014.34 | EPISR | -    | 57.4 |

Yang digunakan sebagai indikator adalah PDRB Perkapita tanpa Migas

\*) Menggunakan data IPM Propinsi

**Lampiran 14.1.A.1 : Intensitas Indikator Pertumbuhan Ekonomi 53 Kota***The Intensity of 53 Cities of Growth Indicators*(Rata-rata Pertumbuhan Ekonomi tahun 1999 - 2003/ *Average of Growth Indicators in 1999-2003*)

| NO                 | PROPINSI  | KOTA             | 1999   | 2000   | 2001  | 2002  | 2003  | Rata-Rata | Intensitas | Score  |
|--------------------|-----------|------------------|--------|--------|-------|-------|-------|-----------|------------|--------|
| 1                  | Sumut     | Binjai           | 4.4    | 6.8    | 2.9   | 3.8   | 8.1   | 5.2       | EPGSD      | 0.0062 |
| 2                  | Sumut     | Medan            | 3.4    | 5.5    | 5.0   | 4.3   | 5.0   | 4.6       | EPGSD      | 0.0062 |
| 3                  | Sumut     | Pematang Siantar | 4.3    | 4.7    | 6.2   | 6.2   | 5.5   | 5.4       | EPGSD      | 0.0062 |
| 4                  | Sumut     | Sibolga          | 5.2    | 5.3    | 5.7   | 4.7   | 5.4   | 5.2       | EPGSD      | 0.0062 |
| 5                  | Sumut     | Tanjung Balai    | 2.6    | 4.5    | 5.3   | 5.3   | 5.5   | 4.6       | EPGSD      | 0.0062 |
| 6                  | Sumut     | Tebing Tinggi    | 3.1    | 2.9    | 3.4   | 3.8   | 3.9   | 3.4       | EPGSD      | 0.0062 |
| 7                  | Sumbar    | Padang           | 1.7    | 4.2    | 4.2   | 4.5   | 4.7   | 3.9       | EPGSD      | 0.0062 |
| 8                  | Sumbar    | Sawahlunto       | (5.9)  | (6.1)  | (2.6) | (0.8) | (3.4) | (3.7)     | EPGSR      | 0.0016 |
| 9                  | Riau      | Pekanbaru        | (1.7)  | 16.5   | 2.7   | 14.9  | 7.4   | 8.0       | EPGST      | 0.0222 |
| 10                 | Riau      | Dumai            |        |        | 4.7   | 5.1   | 7.2   | 3.4       | EPGT       | 0.0133 |
| 11                 | Kep. Riau | Tanjung Pinang   |        |        | 5.6   | 6.8   | 4.0   | 3.3       | EPGT       | 0.0133 |
| 12                 | Kep. Riau | Batam            | 6.4    | 7.7    | 5.2   | 6.0   | 75.3  | 20.1      | EPGST      | 0.0222 |
| 13                 | Jambi     | Jambi            | 3.0    | 1.3    | 3.2   | 3.7   | 3.9   | 3.0       | EPGSD      | 0.0062 |
| 14                 | Sumsel    | Palembang        | 3.0    | 17.9   | 4.4   | 6.0   | 6.6   | 7.6       | EPGST      | 0.0222 |
| 15                 | Babel     | Pangkal Pinang   | 1.6    | 8.7    | 5.9   | 5.5   | 6.1   | 5.6       | EPGT       | 0.0133 |
| 16                 | Bengkulu  | Bengkulu         | 4.0    | 5.5    | 4.0   | 4.5   | 4.7   | 4.5       | EPGSD      | 0.0062 |
| 17                 | Lampung   | Bandar Lampung   | 3.0    | 3.6    | 3.0   | 3.9   | 6.5   | 4.0       | EPGSD      | 0.0062 |
| 18                 | Banten    | Cilegon          | 2.1    | 4.4    | 4.8   | 3.9   | 4.8   | 4.0       | EPGSD      | 0.0062 |
| 19                 | Banten    | Tangerang        | 2.6    | 4.0    | 4.2   | 4.5   | 6.3   | 4.3       | EPGSD      | 0.0062 |
| 20                 | DKI       | Jakarta          | 0.7    | 3.4    | 3.5   | 3.8   | 4.2   | 3.1       | EPGSD      | 0.0062 |
| 21                 | Jabar     | Bekasi           | 2.6    | 6.9    | 5.0   | 5.3   | 4.7   | 4.9       | EPGSD      | 0.0062 |
| 22                 | Jabar     | Bogor            | 3.3    | 21.2   | 5.3   | 5.5   | 5.7   | 8.2       | EPGST      | 0.0222 |
| 23                 | Jabar     | Bandung          | 2.8    | 5.4    | 6.8   | 6.4   | 6.4   | 5.6       | EPGT       | 0.0133 |
| 24                 | Jabar     | Sukabumi         | 3.2    | 4.8    | 4.8   | 4.9   | 5.1   | 4.6       | EPGSD      | 0.0062 |
| 25                 | Jabar     | Cirebon          | 2.3    | 9.1    | 2.8   | 4.3   | 1.5   | 4.0       | EPGSD      | 0.0062 |
| 26                 | Jateng    | Semarang         | 3.4    | 5.0    | 4.9   | 3.9   | 4.4   | 4.3       | EPGSD      | 0.0062 |
| 27                 | Jateng    | Tegal            | 3.7    | 5.1    | 5.0   | 5.0   | 5.1   | 4.8       | EPGSD      | 0.0062 |
| 28                 | Jateng    | Pekalongan       | 4.0    | 4.0    | 4.1   | 3.3   | 3.7   | 3.8       | EPGSD      | 0.0062 |
| 29                 | Jateng    | Surakarta        | 1.4    | 4.2    | 3.8   | 5.1   | 6.1   | 4.1       | EPGSD      | 0.0062 |
| 30                 | DIY       | Yogyakarta       | 1.0    | 3.6    | 3.3   | 3.1   | 3.7   | 2.9       | EPGSD      | 0.0062 |
| 31                 | Jatim     | Kediri           | 1.5    | 5.8    | 5.7   | (2.8) | 3.3   | 2.7       | EPGSD      | 0.0062 |
| 32                 | Jatim     | Malang           | 1.5    | 3.0    | 2.2   | 7.7   | 4.0   | 3.7       | EPGSD      | 0.0062 |
| 33                 | Jatim     | Madiun           | 1.1    | 2.7    | 3.4   | 3.9   | 3.6   | 2.9       | EPGSD      | 0.0062 |
| 34                 | Jatim     | Mojokerto        | 1.3    | 8.4    | 2.3   | 7.4   | 3.9   | 4.7       | EPGSD      | 0.0062 |
| 35                 | Jatim     | Surabaya         | (15.3) | (11.2) | 4.1   | 3.7   | 4.5   | (2.8)     | EPGSR      | 0.0016 |
| 36                 | Jatim     | Probolinggo      | 3.8    | 1.3    | 1.9   | 4.1   | 3.9   | 3.0       | EPGSD      | 0.0062 |
| 37                 | Bali      | Denpasar         | 1.4    | 3.1    | 3.8   | 2.9   | 3.5   | 3.0       | EPGSD      | 0.0062 |
| 38                 | Kalbar    | Pontianak        | 1.7    | 2.7    | 3.1   | 4.0   | 3.5   | 3.0       | EPGSD      | 0.0062 |
| 39                 | Kalteng   | Palangkaraya     | 0.2    | (2.5)  | 2.6   | 0.7   | 3.7   | 0.9       | EPGSR      | 0.0016 |
| 40                 | Kalsel    | Banjarmasin      | (0.1)  | (60.7) | (1.3) | 2.6   | 3.8   | (11.1)    | EPGSR      | 0.0016 |
| 41                 | Kaltim    | Balikpapan       | 0.2    | 101.8  | 12.8  | 7.3   | 8.1   | 26.0      | EPGST      | 0.0222 |
| 42                 | Kaltim    | Samarinda        | 4.7    | 5.3    | 10.9  | 8.7   | 8.4   | 7.6       | EPGST      | 0.0222 |
| 43                 | Sulut     | Bitung           | 6.6    | 44.4   | 6.3   | 5.6   | 5.5   | 13.7      | EPGST      | 0.0222 |
| 44                 | Sulut     | Manado           | 1.6    | 6.0    | 4.9   | 4.8   | 5.4   | 4.6       | EPGSD      | 0.0062 |
| 45                 | Gorontalo | Gorontalo        | 4.3    | 5.6    | 5.6   | 6.0   | 6.2   | 5.5       | EPGT       | 0.0133 |
| 46                 | Sulteng   | Palu             | 1.8    | 5.1    | 5.0   | 3.6   | 7.5   | 4.6       | EPGSD      | 0.0062 |
| 47                 | Sultra    | Kendari          | (1.8)  | 7.9    | 7.3   | 5.3   | 8.1   | 5.4       | EPGSD      | 0.0062 |
| 48                 | Sulsel    | Makasar          | 4.2    | 5.6    | 5.7   | 5.8   | 6.9   | 5.6       | EPGT       | 0.0133 |
| 49                 | Sulsel    | Pare Pare        | 0.8    | 10.5   | 5.0   | 5.1   | 5.1   | 5.3       | EPGSD      | 0.0062 |
| 50                 | NTB       | Mataram          | 1.3    | (16.8) | 5.1   | 5.8   | 6.6   | 0.4       | EPGSR      | 0.0016 |
| 51                 | NTT       | Kupang           | 6.0    | 4.7    | 5.7   | 8.5   | 5.5   | 6.1       | EPGT       | 0.0133 |
| 52                 | Irjabar   | Sorong           |        |        | 5.9   | 6.9   | 6.7   | 6.5       | EPGST      | 0.0222 |
| 53                 | Papua     | Jayapura         | (1.4)  | 10.1   | 4.7   | 5.3   | 6.1   | 5.0       | EPGSD      | 0.0062 |
| <b>Rata-rata :</b> |           |                  | 1.9    | 6.0    | 4.5   | 4.9   | 6.5   | 4.8       |            |        |

**Keterangan :****EPG** : Ekonomi Daerah - Potensi Ekonomi - Growth/Pertumbuhan EkonomiDibelakang **EPG-ST** : Sangat Tinggi**T** : Tinggi**SD** : Sedang**R** : Rendah**SR** : Sangat Rendah

Sumber : BPS Pusat, yang telah diolah.

|           |       |       |     |     |
|-----------|-------|-------|-----|-----|
| Rata-rata | 3.8   | EPGST | 6.5 | -   |
| Standev   | 1.4   | EPGT  | 5.1 | 6.5 |
| Skew      | (0.3) | EPGSD | 2.5 | 5.1 |
| Kuortis   | 0.2   | EPGR  | 1.1 | 2.5 |
|           |       | EPGSR | -   | 1.1 |

**Lampiran 14.1.B : Variabel Potensi Ekonomi 161 Kabupaten**  
*Economic Potential of 161 Cities*

| NO | PROPINSI | KABUPATEN            | Indikator PDRB Perkapita (Tanpa Migas) |            |        | Indikator IPM |            |        |
|----|----------|----------------------|----------------------------------------|------------|--------|---------------|------------|--------|
|    |          |                      | PDRB Perkapita 2003                    | Intensitas | Score  | IPM 2002      | Intensitas | Score  |
| 1  | Sumut    | Asahan               | 11,703,211.65                          | EPPST      | 0.0247 | 67.0          | EPISD      | 0.0051 |
| 2  | Sumut    | Dairi                | 7,009,776.85                           | EPPT       | 0.0126 | 67.2          | EPISD      | 0.0051 |
| 3  | Sumut    | Deliserdang          | 4,954,665.53                           | EPPSD      | 0.0062 | 68.4          | EPISD      | 0.0051 |
| 4  | Sumut    | Langkat              | 5,205,232.65                           | EPPSD      | 0.0062 | 68.3          | EPISD      | 0.0051 |
| 5  | Sumut    | Simalungun           | 6,027,802.24                           | EPPSD      | 0.0062 | 68.3          | EPISD      | 0.0051 |
| 6  | Sumut    | Karo                 | 7,680,394.31                           | EPPT       | 0.0126 | 70.9          | EPIT       | 0.0079 |
| 7  | Sumut    | Labuhan Batu         | 9,618,574.34                           | EPPST      | 0.0247 | 67.3          | EPISD      | 0.0051 |
| 8  | Sumut    | Tapanuli Utara       | 5,887,504.51                           | EPPSD      | 0.0062 | 67.3          | EPISD      | 0.0051 |
| 9  | Sumbar   | Pesisir Selatan      | 4,263,622.71                           | EPPSD      | 0.0062 | 65.9          | EPISD      | 0.0051 |
| 10 | Sumbar   | Sawalunto/Sijnjung   | 5,868,969.69                           | EPPSD      | 0.0062 | 61.5          | EPIR       | 0.0014 |
| 11 | Sumbar   | Pasaman              | 4,081,792.10                           | EPPSD      | 0.0062 | 64.4          | EPISD      | 0.0051 |
| 12 | Sumbar   | Solok                | 5,296,991.70                           | EPPSD      | 0.0062 | 63.7          | EPISD      | 0.0051 |
| 13 | Riau     | Bengkalis            | 3,742,598.80                           | EPPR       | 0.0030 | 69.4          | EPISD      | 0.0051 |
| 14 | Riau     | Indragiri Hilir      | 5,242,723.09                           | EPPSD      | 0.0062 | 67.8          | EPISD      | 0.0051 |
| 15 | Riau     | Kampar               | 3,577,315.55                           | EPPR       | 0.0030 | 67.8          | EPISD      | 0.0051 |
| 16 | Riau     | Kuantan Sengigi      | 5,415,548.88                           | EPPSD      | 0.0062 | 66.7          | EPISD      | 0.0051 |
| 17 | Riau     | Pelalawan            | 4,714,421.51                           | EPPSD      | 0.0062 | 65.9          | EPISD      | 0.0051 |
| 18 | Riau     | Rokan Hulu           | 3,533,650.37                           | EPPR       | 0.0030 | 64.2          | EPISD      | 0.0051 |
| 19 | Jambi    | Batanghari           | 4,734,902.06                           | EPPSD      | 0.0062 | 66.7          | EPISD      | 0.0051 |
| 20 | Jambi    | Bungo                | 4,242,281.74                           | EPPSD      | 0.0062 | <b>67.1</b>   | EPISD      | 0.0051 |
| 21 | Jambi    | Kerinci              | 5,160,169.70                           | EPPSD      | 0.0062 | 68.0          | EPISD      | 0.0051 |
| 22 | Jambi    | Tanjung Jabung Timur | 5,282,856.10                           | EPPSD      | 0.0062 | 65.3          | EPISD      | 0.0051 |
| 23 | Jambi    | Tebo                 | 3,267,601.35                           | EPPR       | 0.0030 | 64.2          | EPISD      | 0.0051 |
| 24 | Sumsel   | Muara Enim           | 7,190,397.96                           | EPPT       | 0.0126 | 64.2          | EPISD      | 0.0051 |
| 25 | Sumsel   | Musi Banyuasin       | 8,229,782.37                           | EPPT       | 0.0247 | 64.6          | EPISD      | 0.0051 |
| 26 | Sumsel   | Musi Rawas           | 3,726,076.95                           | EPPR       | 0.0030 | 62.0          | EPISD      | 0.0051 |
| 27 | Sumsel   | Ogan Komiring Ilir   | 4,414,535.98                           | EPPSD      | 0.0062 | 63.1          | EPISD      | 0.0051 |
| 28 | Sumsel   | Lahat                | 4,708,979.86                           | EPPSD      | 0.0062 | 65.1          | EPISD      | 0.0051 |
| 29 | Babel    | Bangka               | 6,439,356.38                           | EPPSD      | 0.0062 | 64.8          | EPISD      | 0.0051 |
| 30 | Babel    | Belitung             | 7,771,669.90                           | EPPT       | 0.0126 | 66.6          | EPISD      | 0.0051 |
| 31 | Bengkulu | Bengkulu Selatan     | 4,064,228.24                           | EPPSD      | 0.0062 | 65.0          | EPISD      | 0.0051 |
| 32 | Bengkulu | Rejang Lebong        | 3,951,765.35                           | EPPR       | 0.0030 | 64.2          | EPISD      | 0.0051 |
| 33 | Bengkulu | Bengkulu Utara       | 2,867,953.33                           | EPPR       | 0.0030 | 64.4          | EPISD      | 0.0051 |
| 34 | Lampung  | Lampung Barat        | 2,487,042.08                           | EPPSR      | 0.0016 | 63.1          | EPISD      | 0.0051 |
| 35 | Lampung  | Lampung Selatan      | 3,925,609.94                           | EPPR       | 0.0030 | 64.4          | EPISD      | 0.0051 |
| 36 | Lampung  | Lampung Timur        | 3,674,880.42                           | EPPR       | 0.0030 | 65.7          | EPISD      | 0.0051 |
| 37 | Lampung  | Lampung Utara        | 3,697,226.27                           | EPPR       | 0.0030 | 66.3          | EPISD      | 0.0051 |
| 38 | Lampung  | Way Kanan            | 2,616,837.10                           | EPPSR      | 0.0016 | 64.5          | EPISD      | 0.0051 |
| 39 | Banten   | Lebak                | 3,386,405.25                           | EPPR       | 0.0030 | 61.6          | EPIR       | 0.0014 |
| 40 | Banten   | Serang               | 4,981,952.26                           | EPPSD      | 0.0062 | 63.7          | EPISD      | 0.0051 |
| 41 | Banten   | Tangerang            | 5,698,117.72                           | EPPSD      | 0.0062 | 70.7          | EPISD      | 0.0051 |
| 42 | Jabar    | Bekasi               | 20,144,074.81                          | EPPT       | 0.0247 | 66.9          | EPISD      | 0.0051 |
| 43 | Jabar    | Bogor                | 3,840,754.17                           | EPPR       | 0.0030 | 65.6          | EPISD      | 0.0051 |
| 44 | Jabar    | Ciamis               | 4,437,736.78                           | EPPSD      | 0.0062 | 65.3          | EPISD      | 0.0051 |
| 45 | Jabar    | Tasikmalaya          | 3,046,581.49                           | EPPR       | 0.0030 | 67.1          | EPISD      | 0.0051 |
| 46 | Jabar    | Garut                | 3,665,434.83                           | EPPR       | 0.0030 | 62.8          | EPISD      | 0.0051 |
| 47 | Jabar    | Sumedang             | 3,764,410.86                           | EPPR       | 0.0030 | 67.5          | EPISD      | 0.0051 |
| 48 | Jabar    | Bandung              | 5,862,901.82                           | EPPSD      | 0.0062 | 68.8          | EPISD      | 0.0051 |
| 49 | Jabar    | Cianjur              | 3,891,054.91                           | EPPR       | 0.0030 | 64.5          | EPISD      | 0.0051 |
| 50 | Jabar    | Sukabumi             | 3,655,516.03                           | EPPR       | 0.0030 | 63.8          | EPISD      | 0.0051 |
| 51 | Jabar    | Cirebon              | 3,008,354.34                           | EPPR       | 0.0030 | 62.4          | EPISD      | 0.0051 |
| 52 | Jabar    | Kuningan             | 2,967,220.77                           | EPPR       | 0.0030 | 65.0          | EPISD      | 0.0051 |
| 53 | Jabar    | Indramayu            | 4,055,806.04                           | EPPSD      | 0.0062 | 61.2          | EPIR       | 0.0014 |
| 54 | Jabar    | Purwakarta           | 8,329,141.23                           | EPPT       | 0.0247 | 65.6          | EPISD      | 0.0051 |
| 55 | Jabar    | Karawang             | 6,491,722.17                           | EPPSD      | 0.0062 | 62.9          | EPISD      | 0.0051 |
| 56 | Jabar    | Subang               | 4,253,182.45                           | EPPSD      | 0.0062 | 63.0          | EPISD      | 0.0051 |
| 57 | Jateng   | Kendal               | 6,244,002.17                           | EPPSD      | 0.0062 | 65.5          | EPISD      | 0.0051 |
| 58 | Jateng   | Pekalongan           | 4,171,740.10                           | EPPSD      | 0.0062 | 63.9          | EPISD      | 0.0051 |
| 59 | Jateng   | Pemalang             | 2,658,246.24                           | EPPSR      | 0.0016 | 62.2          | EPISD      | 0.0051 |

| NO  | PROPINSI | KABUPATEN           | Indikator PDRB Perkapita (Tanpa Migas) |            |        | Indikator IPM |            |        |
|-----|----------|---------------------|----------------------------------------|------------|--------|---------------|------------|--------|
|     |          |                     | PDRB Perkapita 2003                    | Intensitas | Score  | IPM 2002      | Intensitas | Score  |
| 60  | Jateng   | Tegal               | 2,124,512.26                           | EPPSR      | 0.0016 | 63.3          | EPISD      | 0.0051 |
| 61  | Jateng   | Jepara              | 3,809,266.65                           | EPPR       | 0.0030 | 66.9          | EPISD      | 0.0051 |
| 62  | Jateng   | Kudus               | 16,080,540.45                          | EPPST      | 0.0247 | 66.9          | EPISD      | 0.0051 |
| 63  | Jateng   | Banyumas            | 2,369,652.83                           | EPPSR      | 0.0016 | 66.7          | EPISD      | 0.0051 |
| 64  | Jateng   | Cilacap             | 10,242,460.43                          | EPPST      | 0.0247 | 65.3          | EPISD      | 0.0051 |
| 65  | Jateng   | Wonosobo            | 2,428,467.18                           | EPPSR      | 0.0016 | 64.7          | EPISD      | 0.0051 |
| 66  | Jateng   | Kebumen             | 2,479,344.66                           | EPPSR      | 0.0016 | 65.6          | EPISD      | 0.0051 |
| 67  | Jateng   | Boyolali            | 3,884,668.44                           | EPPR       | 0.0030 | 65.7          | EPISD      | 0.0051 |
| 68  | Jateng   | Sukoharjo           | 4,431,768.56                           | EPPSD      | 0.0062 | 67.7          | EPISD      | 0.0051 |
| 69  | Jateng   | Karanganyar         | 4,316,783.19                           | EPPSD      | 0.0062 | 68.5          | EPISD      | 0.0051 |
| 70  | Jateng   | Klaten              | 3,819,569.68                           | EPPR       | 0.0030 | 67.8          | EPISD      | 0.0051 |
| 71  | Jateng   | Magelang            | 3,277,225.93                           | EPPR       | 0.0030 | 67.2          | EPISD      | 0.0051 |
| 72  | DIY      | Bantul              | 3,812,888.80                           | EPPR       | 0.0030 | 68.4          | EPISD      | 0.0051 |
| 73  | DIY      | Gunung Kidul        | 4,200,578.32                           | EPPSD      | 0.0062 | 67.1          | EPISD      | 0.0051 |
| 74  | Jatim    | Blitar              | 3,119,510.16                           | EPPR       | 0.0030 | 67.4          | EPISD      | 0.0051 |
| 75  | Jatim    | Kediri              | 3,000,379.64                           | EPPR       | 0.0030 | 66.1          | EPISD      | 0.0051 |
| 76  | Jatim    | Magetan             | 3,640,582.27                           | EPPR       | 0.0030 | 67.4          | EPISD      | 0.0051 |
| 77  | Jatim    | Ponorogo            | 2,729,559.87                           | EPPR       | 0.0030 | 62.6          | EPISD      | 0.0051 |
| 78  | Jatim    | Tulungagung         | 4,475,747.17                           | EPPSD      | 0.0062 | 67.6          | EPISD      | 0.0051 |
| 79  | Jatim    | Mojokerto           | 4,166,769.71                           | EPPSD      | 0.0062 | 67.7          | EPISD      | 0.0051 |
| 80  | Jatim    | Pamekasan           | 2,349,646.57                           | EPPSR      | 0.0016 | 58.3          | EPIR       | 0.0014 |
| 81  | Jatim    | Bangkalan           | 2,902,005.83                           | EPPR       | 0.0030 | 57.6          | EPIR       | 0.0014 |
| 82  | Jatim    | Pasuruhan           | 3,569,608.32                           | EPPR       | 0.0030 | 61.5          | EPIR       | 0.0014 |
| 83  | Jatim    | Sidoarjo            | 9,621,279.23                           | EPPST      | 0.0247 | 71.7          | EPIT       | 0.0079 |
| 84  | Jatim    | Gresik              | 13,173,713.92                          | EPPST      | 0.0247 | 69.3          | EPISD      | 0.0051 |
| 85  | Jatim    | Jombang             | 3,938,589.30                           | EPPR       | 0.0030 | 66.0          | EPISD      | 0.0051 |
| 86  | Jatim    | Lamongan            | 3,167,485.09                           | EPPR       | 0.0030 | 63.9          | EPISD      | 0.0051 |
| 87  | Jatim    | Banyuwangi          | 4,207,591.76                           | EPPSD      | 0.0062 | 62.6          | EPISD      | 0.0051 |
| 88  | Jatim    | Bondowoso           | 2,338,587.41                           | EPPSR      | 0.0016 | 54.1          | EPISD      | 0.0008 |
| 89  | Jatim    | Situbondo           | 4,226,336.63                           | EPPSD      | 0.0062 | 56.2          | EPISD      | 0.0008 |
| 90  | Jatim    | Jember              | 3,384,527.31                           | EPPR       | 0.0030 | 58.1          | EPIR       | 0.0014 |
| 91  | Bali     | Badung              | 12,592,259.62                          | EPPST      | 0.0247 | 70.1          | EPISD      | 0.0051 |
| 92  | Bali     | Bangli              | 4,910,148.15                           | EPPSD      | 0.0062 | 66.7          | EPISD      | 0.0051 |
| 93  | Bali     | Buleleng            | 4,917,032.64                           | EPPSD      | 0.0062 | 63.9          | EPISD      | 0.0051 |
| 94  | Bali     | Gianyar             | 6,763,528.90                           | EPPT       | 0.0126 | 67.7          | EPISD      | 0.0051 |
| 95  | Bali     | Jembrana            | 6,056,071.45                           | EPPSD      | 0.0062 | 68.9          | EPISD      | 0.0051 |
| 96  | Bali     | Tabanan             | 5,019,778.04                           | EPPSD      | 0.0062 | 70.4          | EPISD      | 0.0051 |
| 97  | Bali     | Klungkung           | 6,709,844.62                           | EPPT       | 0.0126 | 64.6          | EPISD      | 0.0051 |
| 98  | Bali     | Karang Asem         | 3,959,806.00                           | EPPR       | 0.0030 | 59.3          | EPIR       | 0.0014 |
| 99  | Kalbar   | Kapuas Hulu         | 4,325,370.85                           | EPPSD      | 0.0062 | 62.7          | EPISD      | 0.0051 |
| 100 | Kalbar   | Ketapang            | 3,883,967.47                           | EPPR       | 0.0030 | 63.6          | EPISD      | 0.0051 |
| 101 | Kalbar   | Pontianak           | 7,500,260.31                           | EPPT       | 0.0126 | 64.0          | EPISD      | 0.0051 |
| 102 | Kalbar   | Sambas              | 5,305,473.39                           | EPPSD      | 0.0062 | 59.3          | EPIR       | 0.0014 |
| 103 | Kalbar   | Sanggau             | 4,289,343.78                           | EPPSD      | 0.0062 | 62.2          | EPISD      | 0.0051 |
| 104 | Kalteng  | Barito Selatan      | 7,323,952.72                           | EPPT       | 0.0126 | 67.8          | EPISD      | 0.0051 |
| 105 | Kalteng  | Barito Utara        | 10,567,618.10                          | EPPST      | 0.0247 | 69.6          | EPISD      | 0.0051 |
| 106 | Kalteng  | Kapuas              | 6,208,326.36                           | EPPSD      | 0.0062 | 69.0          | EPISD      | 0.0051 |
| 107 | Kalsel   | Hulu Sungai Selatan | 4,881,106.45                           | EPPSD      | 0.0062 | 64.6          | EPISD      | 0.0051 |
| 108 | Kalsel   | Hulu Sungai Tengah  | 3,881,223.02                           | EPPR       | 0.0030 | 64.7          | EPISD      | 0.0051 |
| 109 | Kalsel   | Hulu Sungai Utara   | 3,742,805.15                           | EPPR       | 0.0030 | 61.7          | EPIR       | 0.0014 |
| 110 | Kalsel   | Tabalong            | 8,060,493.41                           | EPPST      | 0.0247 | 63.6          | EPISD      | 0.0051 |
| 111 | Kalsel   | Tanah Laut          | 6,575,267.55                           | EPPSD      | 0.0062 | 65.9          | EPISD      | 0.0051 |
| 112 | Kalsel   | Tapin               | 5,612,776.86                           | EPPSD      | 0.0062 | 67.0          | EPISD      | 0.0051 |
| 113 | Kaltim   | Berau               | 22,399,709.54                          | EPPST      | 0.0247 | 67.7          | EPISD      | 0.0051 |
| 114 | Kaltim   | Kutai Kertanegara   | 16,860,862.44                          | EPPST      | 0.0247 | 67.8          | EPISD      | 0.0051 |
| 115 | Kaltim   | Pasir               | 11,727,256.36                          | EPPST      | 0.0247 | 67.9          | EPISD      | 0.0051 |
| 116 | Kaltim   | Bulungan            | 14,307,836.88                          | EPPST      | 0.0247 | 69.5          | EPISD      | 0.0051 |
| 117 | Kaltim   | Kutai Timur         | 35,170,206.18                          | EPPST      | 0.0247 | 66.1          | EPISD      | 0.0051 |
| 118 | Kaltim   | Nunukan             | 3,826,514.49                           | EPPR       | 0.0030 | 67.8          | EPISD      | 0.0051 |

| NO  | PROPINSI  | KABUPATEN            | Indikator PDRB Perkapita (Tanpa Migas) |            |        | Indikator IPM |            |        |
|-----|-----------|----------------------|----------------------------------------|------------|--------|---------------|------------|--------|
|     |           |                      | PDRB Perkapita 2003                    | Intensitas | Score  | IPM 2002      | Intensitas | Score  |
| 119 | Sulut     | Minahasa             | 3,009,787.69                           | EPPR       | 0.0030 | 72.0          | EPIT       | 0.0079 |
| 120 | Sulut     | Sangihe Talaut       | 4,135,219.59                           | EPPSD      | 0.0062 | 70.1          | EPISD      | 0.0051 |
| 121 | Gorontalo | Gorontalo            | 2,284,885.17                           | EPPSR      | 0.0016 | 64.7          | EPISD      | 0.0051 |
| 122 | Sulteng   | Banggai              | 4,857,513.61                           | EPPSD      | 0.0062 | 65.9          | EPISD      | 0.0051 |
| 123 | Sulteng   | Toli Toli            | 5,187,468.81                           | EPPSD      | 0.0062 | 64.2          | EPISD      | 0.0051 |
| 124 | Sulteng   | Donggala             | 5,467,245.81                           | EPPSD      | 0.0062 | 62.4          | EPISD      | 0.0051 |
| 125 | Sulteng   | Morowali             | 6,297,923.35                           | EPPSD      | 0.0062 | 64.9          | EPISD      | 0.0051 |
| 126 | Sulteng   | Poso                 | 3,168,823.70                           | EPPR       | 0.0030 | 64.3          | EPISD      | 0.0051 |
| 127 | Sultra    | Buton                | 1,281,667.03                           | EPPSR      | 0.0016 | 62.8          | EPISD      | 0.0051 |
| 128 | Sultra    | Kolaka               | 6,210,049.98                           | EPPSD      | 0.0062 | 65.3          | EPISD      | 0.0051 |
| 129 | Sulsel    | Gowa                 | 3,197,533.92                           | EPPR       | 0.0030 | 64.1          | EPISD      | 0.0051 |
| 130 | Sulsel    | Takalar              | 3,121,961.97                           | EPPR       | 0.0030 | 62.3          | EPISD      | 0.0051 |
| 131 | Sulsel    | Jeneponto            | 2,649,394.02                           | EPPSR      | 0.0016 | 57.8          | EPIR       | 0.0014 |
| 132 | Sulsel    | Bantaeng             | 3,485,719.93                           | EPPR       | 0.0030 | 62.6          | EPISD      | 0.0051 |
| 133 | Sulsel    | Sinjai               | 3,798,674.38                           | EPPR       | 0.0030 | 64.3          | EPISD      | 0.0051 |
| 134 | Sulsel    | Selayar              | 3,577,088.88                           | EPPR       | 0.0030 | 63.8          | EPISD      | 0.0051 |
| 135 | Sulsel    | Bone                 | 4,275,255.91                           | EPPSD      | 0.0062 | 63.0          | EPISD      | 0.0051 |
| 136 | Sulsel    | Maros                | 4,209,455.81                           | EPPSD      | 0.0062 | 64.0          | EPISD      | 0.0051 |
| 137 | Sulsel    | Pangkep              | 6,137,475.61                           | EPPSD      | 0.0062 | 63.8          | EPISD      | 0.0051 |
| 138 | Sulsel    | Barru                | 3,554,652.43                           | EPPR       | 0.0030 | 65.7          | EPISD      | 0.0051 |
| 139 | Sulsel    | Pinrang              | 5,440,487.17                           | EPPSD      | 0.0062 | 66.0          | EPISD      | 0.0051 |
| 140 | Sulsel    | Majene               | 3,755,053.80                           | EPPR       | 0.0030 | 64.0          | EPISD      | 0.0051 |
| 141 | Sulsel    | Enrekang             | 3,321,362.91                           | EPPR       | 0.0030 | 67.3          | EPISD      | 0.0051 |
| 142 | Sulsel    | Tanah Toraja         | 2,665,375.50                           | EPPSR      | 0.0016 | 67.2          | EPISD      | 0.0051 |
| 143 | Sulsel    | Luwu                 | 3,124,320.50                           | EPPR       | 0.0030 | 68.1          | EPISD      | 0.0051 |
| 144 | Sulsel    | Luwu Utara           | 4,165,611.40                           | EPPSD      | 0.0062 | 67.9          | EPISD      | 0.0051 |
| 145 | NTB       | Bima                 | 3,335,605.87                           | EPPR       | 0.0030 | 59.0          | EPIR       | 0.0014 |
| 146 | NTB       | Lombok Barat         | 2,975,026.25                           | EPPR       | 0.0030 | 55.0          | EPISD      | 0.0008 |
| 147 | NTB       | Dompu                | 4,511,297.96                           | EPPSD      | 0.0062 | 58.4          | EPIR       | 0.0014 |
| 148 | NTB       | Lombok Timur         | 2,502,097.43                           | EPPSR      | 0.0016 | 56.1          | EPISD      | 0.0008 |
| 149 | NTT       | Ende                 | 2,523,173.11                           | EPPSR      | 0.0016 | 61.3          | EPIR       | 0.0014 |
| 150 | NTT       | Flores Timur         | 2,190,948.00                           | EPPSR      | 0.0016 | 62.6          | EPISD      | 0.0051 |
| 151 | NTT       | Manggarai            | 1,636,541.11                           | EPPSR      | 0.0016 | 60.3          | EPIR       | 0.0014 |
| 152 | NTT       | Ngada                | 2,233,692.76                           | EPPSR      | 0.0016 | 64.0          | EPISD      | 0.0051 |
| 153 | NTT       | Timor Tengah Selatan | 1,903,335.76                           | EPPSR      | 0.0016 | 57.7          | EPIR       | 0.0014 |
| 154 | NTT       | Timor Tengah Utara   | 1,932,735.07                           | EPPSR      | 0.0016 | 59.5          | EPIR       | 0.0014 |
| 155 | NTT       | Belu                 | 1,572,705.16                           | EPPSR      | 0.0016 | 58.3          | EPIR       | 0.0014 |
| 156 | NTT       | Sumba Barat          | 1,532,334.50                           | EPPSR      | 0.0016 | 53.4          | EPISD      | 0.0008 |
| 157 | Irjabar   | Fakfak               | 7,551,499.21                           | EPPT       | 0.0126 | 64.3          | EPISD      | 0.0051 |
| 158 | Irjabar   | Manokwari            | 5,126,567.12                           | EPPSD      | 0.0062 | 58.0          | EPIR       | 0.0014 |
| 159 | Irjabar   | Sorong               | 9,681,522.76                           | EPPST      | 0.0247 | 62.0          | EPISD      | 0.0051 |
| 160 | Papua     | Jayawijaya           | 4,535,247.54                           | EPPSD      | 0.0062 | 47.0          | EPISD      | 0.0008 |
| 161 | Irjabar   | Mimika               | 4,014,383.45                           | EPPR       | 0.0030 | 64.8          | EPISD      | 0.0051 |

**Keterangan :****EPP** : Ekonomi Daerah - Potensi Ekonomi - PDRB Perkapita**EPI** : Ekonomi Daerah - Potensi Ekonomi - IPMDibelakang **EPP/EPI** - **ST** : Sangat Tinggi**T** : Tinggi**SD** : Sedang**R** : Rendah**SR** : Sangat Rendah

Sumber : BPS Pusat, yang telah diolah.

Rata-rata PDRB Perkapita Kota : 11,417,446.80

IPM Indonesia : **65.8**

|       |              |              |       |      |      |
|-------|--------------|--------------|-------|------|------|
| EPPST | 8,013,324.44 | -            | EPIST | 75.2 | -    |
| EPPT  | 6,681,746.92 | 8,013,324.44 | EPIT  | 70.8 | 75.2 |
| EPPSD | 4,018,591.87 | 6,681,746.92 | EPISD | 61.9 | 70.8 |
| EPPR  | 2,687,014.34 | 4,018,591.87 | EPIR  | 57.4 | 61.9 |
| EPPSR | -            | 2,687,014.34 | EPISR | -    | 57.4 |

Yang digunakan sebagai indikator adalah PDRB Perkapita tanpa Migas

\*) Menggunakan data IPM Propinsi

**Lampiran 14.1.B.2 : Intensitas Indikator Pertumbuhan Ekonomi 161 Kabupaten***The Intensity of 161 Regencies of Growth Indicators*(Rata-rata Pertumbuhan Ekonomi tahun 1999 - 2003/*Avarage of Growth Indicators in 1999-2003*)

| NO | PROPINSI | KABUPATEN            | 1999  | 2000   | 2001   | 2002   | 2003    | Rata-Rata | Intensitas | Score  |
|----|----------|----------------------|-------|--------|--------|--------|---------|-----------|------------|--------|
| 1  | Sumut    | Asahan               | 5.3   | 6.1    | 5.2    | 5.0    | 5.4     | 5.4       | EPGSD      | 0.0062 |
| 2  | Sumut    | Dairi                | 0.3   | 7.6    | 5.2    | 5.2    | 4.8     | 4.6       | EPGSD      | 0.0062 |
| 3  | Sumut    | Deliserdang          | 4.0   | 5.3    | 3.9    | 3.5    | 4.6     | 4.2       | EPGSD      | 0.0062 |
| 4  | Sumut    | Langkat              | 1.5   | 3.3    | 3.4    | 2.9    | 3.5     | 2.9       | EPGSD      | 0.0062 |
| 5  | Sumut    | Simalungun           | 4.9   | 3.9    | 4.6    | 4.2    | 4.7     | 4.4       | EPGSD      | 0.0062 |
| 6  | Sumut    | Karo                 | 5.6   | 5.5    | 3.9    | 4.7    | 5.4     | 5.0       | EPGSD      | 0.0062 |
| 7  | Sumut    | Labuhan Batu         | 4.9   | 6.0    | 4.9    | 5.3    | 4.5     | 5.1       | EPGSD      | 0.0062 |
| 8  | Sumut    | Tapanuli Utara       | 2.4   | 3.6    | 4.1    | 4.1    | 4.2     | 3.7       | EPGSD      | 0.0062 |
| 9  | Sumbar   | Pesisir Selatan      | 1.2   | 2.3    | 3.2    | 3.9    | 4.2     | 3.0       | EPGSD      | 0.0062 |
| 10 | Sumbar   | Sawalunto/Sijnjung   | 1.3   | 3.7    | 3.4    | 4.0    | (56.4)  | (8.8)     | EPGSR      | 0.0016 |
| 11 | Sumbar   | Pasaman              | 1.5   | 3.0    | 3.3    | 9.4    | (103.5) | (17.3)    | EPGSR      | 0.0016 |
| 12 | Sumbar   | Solok                | 1.5   | 2.4    | 3.3    | 4.2    | (25.7)  | (2.8)     | EPGSR      | 0.0016 |
| 13 | Riau     | Bengkalis            | 4.1   | (64.2) | 4.5    | 4.8    | 5.4     | (9.1)     | EPGSR      | 0.0016 |
| 14 | Riau     | Indragiri Hilir      | 4.6   | 2.9    | 4.0    | 2.0    | 4.6     | 3.6       | EPGSD      | 0.0062 |
| 15 | Riau     | Kampar               | 3.6   | (77.6) | 5.4    | 5.0    | 5.2     | (11.7)    | EPGSR      | 0.0016 |
| 16 | Riau     | Kuantan Sengigi      |       |        | 5.1    | 4.7    | 4.7     | 4.9       | EPGSD      | 0.0062 |
| 17 | Riau     | Pelalawan            |       |        | 5.3    | 35.5   | 5.7     | 15.5      | EPGST      | 0.0222 |
| 18 | Riau     | Rokan Hulu           |       |        | 6.1    | 6.4    | 5.7     | 6.1       | EPGT       | 0.0133 |
| 19 | Jambi    | Batanghari           | 1.9   | (47.8) | 5.1    | 5.2    | 5.2     | (6.1)     | EPGSR      | 0.0016 |
| 20 | Jambi    | Bungo                |       |        | 3.9    | 4.2    | 4.6     | 4.3       | EPGSD      | 0.0062 |
| 21 | Jambi    | Kerinci              | 3.0   | 3.2    | 3.7    | 3.8    | 4.0     | 3.5       | EPGSD      | 0.0062 |
| 22 | Jambi    | Tanjung Jabung Timur |       |        | 4.2    | 3.7    | 4.4     | 4.1       | EPGSD      | 0.0062 |
| 23 | Jambi    | Tebo                 |       |        | 4.1    | 4.2    | 4.3     | 4.2       | EPGSD      | 0.0062 |
| 24 | Sumsel   | Muara Enim           | 2.8   | (13.3) | 2.3    | 3.1    | 5.8     | 0.1       | EPGSR      | 0.0016 |
| 25 | Sumsel   | Musi Banyuasin       | 1.8   | (57.3) | 2.8    | 4.2    | 5.1     | (8.7)     | EPGSR      | 0.0016 |
| 26 | Sumsel   | Musi Rawas           | 2.9   | (30.2) | 4.0    | 5.6    | 4.3     | (2.7)     | EPGSR      | 0.0016 |
| 27 | Sumsel   | Ogan Komiring Ilir   | (0.4) | 3.4    | 4.5    | 4.7    | 5.0     | 3.4       | EPGSD      | 0.0062 |
| 28 | Sumsel   | Lahat                | 1.7   | (22.4) | 4.8    | 5.0    | 4.5     | (1.3)     | EPGSR      | 0.0016 |
| 29 | Babel    | Bangka               | 0.6   | 4.4    | 4.0    | 4.7    | 9.9     | 4.7       | EPGSD      | 0.0062 |
| 30 | Babel    | Belitung             | 1.3   | 5.5    | 4.7    | 4.1    | 4.6     | 4.1       | EPGSD      | 0.0062 |
| 31 | Bengkulu | Bengkulu Selatan     | 1.6   | 4.3    | 4.1    | (10.7) | 4.8     | 0.8       | EPGSR      | 0.0016 |
| 32 | Bengkulu | Rejang Lebong        | 1.7   | 1.9    | 2.5    | 3.2    | 4.8     | 2.8       | EPGSD      | 0.0062 |
| 33 | Bengkulu | Bengkulu Utara       | 1.8   | 3.2    | 3.6    | (59.6) | 4.3     | (9.3)     | EPGSR      | 0.0016 |
| 34 | Lampung  | Lampung Barat        | 7.0   | 5.6    | 3.2    | 3.7    | 5.3     | 4.9       | EPGSD      | 0.0062 |
| 35 | Lampung  | Lampung Selatan      | 3.4   | 3.8    | 3.5    | 3.7    | 4.2     | 3.7       | EPGSD      | 0.0062 |
| 36 | Lampung  | Lampung Timur        | 2.8   | 18.6   | 3.6    | 3.5    | 3.9     | 6.5       | EPGST      | 0.0222 |
| 37 | Lampung  | Lampung Utara        | 0.1   | 6.0    | 3.4    | 4.2    | 5.2     | 3.8       | EPGSD      | 0.0062 |
| 38 | Lampung  | Way Kanan            | 1.9   | (7.8)  | 3.7    | 3.9    | 4.5     | 1.2       | EPGR       | 0.0030 |
| 39 | Banten   | Lebak                | 2.5   | 10.7   | 4.6    | 3.2    | 3.7     | 5.0       | EPGSD      | 0.0062 |
| 40 | Banten   | Serang               | 0.8   | (47.1) | 3.0    | 3.5    | 4.0     | (7.2)     | EPGSR      | 0.0016 |
| 41 | Banten   | Tangerang            |       |        | 8.1    | 6.6    | 6.6     | 7.1       | EPGST      | 0.0222 |
| 42 | Jabar    | Bekasi               | 1.8   | 68.9   | 4.1    | 4.7    | 5.4     | 17.0      | EPGST      | 0.0222 |
| 43 | Jabar    | Bogor                | 1.6   | (21.1) | (24.4) | 25.7   | 4.1     | (2.8)     | EPGSR      | 0.0016 |
| 44 | Jabar    | Ciamis               | 2.4   | 2.6    | 3.3    | 3.4    | 3.4     | 3.0       | EPGSD      | 0.0062 |
| 45 | Jabar    | Tasikmalaya          | 2.3   | 11.4   | 2.9    | 3.0    | 3.1     | 4.5       | EPGSD      | 0.0062 |
| 46 | Jabar    | Garut                | 2.5   | 3.9    | 3.3    | 3.7    | 3.2     | 3.3       | EPGSD      | 0.0062 |
| 47 | Jabar    | Sumedang             | 2.4   | 3.9    | 3.2    | 3.7    | 3.6     | 3.4       | EPGSD      | 0.0062 |
| 48 | Jabar    | Bandung              | 3.0   | 5.3    | 4.8    | 4.7    | 4.8     | 4.5       | EPGSD      | 0.0062 |
| 49 | Jabar    | Cianjur              | 2.0   | 3.4    | 3.5    | 3.6    | 3.3     | 3.2       | EPGSD      | 0.0062 |
| 50 | Jabar    | Sukabumi             | 1.6   | 12.5   | 6.1    | 5.4    | 5.0     | 6.1       | EPGT       | 0.0133 |
| 51 | Jabar    | Cirebon              | 3.6   | 5.0    | 4.7    | 4.0    | 3.0     | 4.1       | EPGSD      | 0.0062 |
| 52 | Jabar    | Kuningan             | 1.3   | 2.8    | 3.6    | 3.8    | 4.1     | 3.1       | EPGSD      | 0.0062 |
| 53 | Jabar    | Indramayu            | (9.8) | 58.6   | 3.9    | 3.7    | 4.3     | 12.1      | EPGST      | 0.0222 |
| 54 | Jabar    | Purwakarta           | 2.0   | 116.6  | 3.2    | 3.2    | 2.9     | 25.6      | EPGST      | 0.0222 |
| 55 | Jabar    | Karawang             | 5.6   | 12.8   | 6.1    | 5.8    | 4.2     | 6.9       | EPGST      | 0.0222 |
| 56 | Jabar    | Subang               | 2.3   | 4.1    | 4.3    | 4.3    | 4.4     | 3.9       | EPGSD      | 0.0062 |
| 57 | Jateng   | Kendal               | 2.2   | 2.0    | 2.6    | 1.3    | 3.1     | 2.2       | EPGR       | 0.0030 |
| 58 | Jateng   | Pekalongan           | 3.5   | 2.5    | 4.1    | 3.2    | 3.4     | 3.4       | EPGSD      | 0.0062 |
| 59 | Jateng   | Pemalang             | 1.6   | 3.7    | 3.1    | 3.5    | 3.3     | 3.0       | EPGSD      | 0.0062 |
| 60 | Jateng   | Tegal                | 2.5   | 4.9    | 4.4    | 4.1    | 4.7     | 4.1       | EPGSD      | 0.0062 |



| NO  | PROPINSI | KABUPATEN           | 1999  | 2000   | 2001    | 2002 | 2003  | Rata-Rata | Intensitas | Score  |
|-----|----------|---------------------|-------|--------|---------|------|-------|-----------|------------|--------|
| 61  | Jateng   | Jepara              | 0.7   | 4.6    | 3.6     | 3.6  | 3.5   | 3.2       | EPGSD      | 0.0062 |
| 62  | Jateng   | Kudus               | 0.8   | 1.9    | 3.1     | 3.6  | 3.9   | 2.7       | EPGSD      | 0.0062 |
| 63  | Jateng   | Banyumas            | 0.5   | 4.0    | 1.1     | 3.3  | 2.2   | 2.2       | EPGR       | 0.0030 |
| 64  | Jateng   | Cilacap             | 26.6  | 6.9    | 4.4     | 6.8  | 5.2   | 10.0      | EPGST      | 0.0222 |
| 65  | Jateng   | Wonosobo            | 1.5   | (0.5)  | 1.0     | 2.0  | 2.2   | 1.3       | EPGR       | 0.0030 |
| 66  | Jateng   | Kebumen             | 3.6   | 0.3    | 1.7     | 2.8  | 3.0   | 2.3       | EPGR       | 0.0030 |
| 67  | Jateng   | Boyolali            | 1.2   | 2.1    | 3.5     | 5.2  | 5.3   | 3.4       | EPGSD      | 0.0062 |
| 68  | Jateng   | Sukoharjo           | 1.3   | 3.5    | 3.9     | 3.5  | 3.5   | 3.1       | EPGSD      | 0.0062 |
| 69  | Jateng   | Karanganyar         | 2.5   | 4.5    | 1.4     | 3.1  | 3.2   | 2.9       | EPGSD      | 0.0062 |
| 70  | Jateng   | Klaten              | 0.5   | 4.0    | 4.1     | 3.3  | 3.9   | 3.2       | EPGSD      | 0.0062 |
| 71  | Jateng   | Magelang            | 1.6   | 3.5    | 3.8     | 4.3  | 4.4   | 3.5       | EPGSD      | 0.0062 |
| 72  | DIY      | Bantul              | 1.4   | 3.2    | 3.0     | 3.5  | 4.2   | 3.1       | EPGSD      | 0.0062 |
| 73  | DIY      | Gunung Kidul        | 1.6   | 13.3   | 2.1     | 1.9  | 2.3   | 4.2       | EPGSD      | 0.0062 |
| 74  | Jatim    | Blitar              | 2.1   | 1.8    | 2.3     | 3.8  | 4.0   | 2.8       | EPGSD      | 0.0062 |
| 75  | Jatim    | Kediri              | 0.9   | 4.0    | 2.5     | 1.5  | 3.3   | 2.4       | EPGR       | 0.0030 |
| 76  | Jatim    | Magetan             | 1.8   | 2.3    | 2.6     | 2.9  | 3.5   | 2.6       | EPGSD      | 0.0062 |
| 77  | Jatim    | Ponorogo            | 1.2   | 2.1    | 2.7     | 3.4  | 3.5   | 2.6       | EPGSD      | 0.0062 |
| 78  | Jatim    | Tulungagung         | 4.1   | 2.5    | 4.3     | 4.4  | 3.7   | 3.8       | EPGSD      | 0.0062 |
| 79  | Jatim    | Mojokerto           | 1.2   | 3.0    | 3.3     | 3.6  | 3.6   | 2.9       | EPGSD      | 0.0062 |
| 80  | Jatim    | Pamekasan           | (6.3) | 1.4    | 1.5     | 2.1  | 3.2   | 0.4       | EPGSR      | 0.0016 |
| 81  | Jatim    | Bangkalan           | 3.0   | 3.2    | 3.6     | 3.2  | 2.5   | 3.1       | EPGSD      | 0.0062 |
| 82  | Jatim    | Pasuruhan           | 5.8   | (0.4)  | 3.7     | 3.8  | 3.3   | 3.2       | EPGSD      | 0.0062 |
| 83  | Jatim    | Sidoarjo            | 1.7   | 3.1    | 3.5     | 3.8  | 5.7   | 3.6       | EPGSD      | 0.0062 |
| 84  | Jatim    | Gresik              | 2.0   | 3.0    | 5.2     | 4.7  | 3.6   | 3.7       | EPGSD      | 0.0062 |
| 85  | Jatim    | Jombang             | 0.1   | 4.3    | 3.1     | 3.5  | 4.3   | 3.0       | EPGSD      | 0.0062 |
| 86  | Jatim    | Lamongan            | 2.2   | 2.3    | 2.8     | 3.1  | 3.5   | 2.8       | EPGSD      | 0.0062 |
| 87  | Jatim    | Banyuwangi          | 1.7   | 6.6    | 4.5     | 2.9  | 3.5   | 3.8       | EPGSD      | 0.0062 |
| 88  | Jatim    | Bondowoso           | 1.3   | 2.1    | 1.7     | 4.2  | 3.2   | 2.5       | EPGSD      | 0.0062 |
| 89  | Jatim    | Situbondo           | 1.2   | 3.3    | 2.4     | 2.2  | 4.1   | 2.7       | EPGSD      | 0.0062 |
| 90  | Jatim    | Jember              | 1.9   | 3.3    | 3.4     | 4.0  | 4.2   | 3.4       | EPGSD      | 0.0062 |
| 91  | Bali     | Badung              | 0.6   | 4.9    | 5.0     | 3.5  | 2.7   | 3.4       | EPGSD      | 0.0062 |
| 92  | Bali     | Bangli              | 0.5   | 2.4    | 3.2     | 3.0  | 3.3   | 2.5       | EPGSD      | 0.0062 |
| 93  | Bali     | Buleleng            | 1.1   | 3.5    | 3.6     | 3.5  | 3.7   | 3.1       | EPGSD      | 0.0062 |
| 94  | Bali     | Gianyar             | 1.8   | 4.7    | 4.3     | 3.6  | 3.5   | 3.6       | EPGSD      | 0.0062 |
| 95  | Bali     | Jembrana            | 0.9   | 3.5    | 3.2     | 2.5  | 3.7   | 2.8       | EPGSD      | 0.0062 |
| 96  | Bali     | Tabanan             | 0.6   | 2.5    | 3.2     | 2.9  | 3.1   | 2.5       | EPGSD      | 0.0062 |
| 97  | Bali     | Klungkung           | 0.9   | 2.5    | 4.2     | 3.0  | 3.3   | 2.8       | EPGSD      | 0.0062 |
| 98  | Bali     | Karang Asem         | 0.7   | 2.5    | 2.8     | 2.9  | 3.2   | 2.4       | EPGR       | 0.0030 |
| 99  | Kalbar   | Kapuas Hulu         | 2.8   | 3.6    | 2.9     | 2.9  | 2.5   | 2.9       | EPGSD      | 0.0062 |
| 100 | Kalbar   | Ketapang            | 2.5   | 2.7    | 1.8     | 2.8  | 1.6   | 2.3       | EPGR       | 0.0030 |
| 101 | Kalbar   | Pontianak           | 1.0   | 1.2    | 0.8     | 1.0  | 1.3   | 1.0       | EPGSR      | 0.0016 |
| 102 | Kalbar   | Sambas              | 3.9   | 1.4    | 4.2     | 3.9  | 3.0   | 3.3       | EPGSD      | 0.0062 |
| 103 | Kalbar   | Sanggau             | 6.1   | 7.0    | 2.2     | 2.8  | 6.1   | 4.8       | EPGSD      | 0.0062 |
| 104 | Kalteng  | Barito Selatan      | 1.0   | 1.8    | 2.7     | 2.7  | 3.2   | 2.3       | EPGR       | 0.0030 |
| 105 | Kalteng  | Barito Utara        | (5.3) | 6.1    | 1.8     | 1.7  | 3.5   | 1.5       | EPGR       | 0.0030 |
| 106 | Kalteng  | Kapuas              | (0.6) | 1.8    | 2.7     | 5.9  | 5.0   | 3.0       | EPGSD      | 0.0062 |
| 107 | Kalsel   | Hulu Sungai Selatan | 2.3   | 5.6    | 5.0     | 4.3  | 4.7   | 4.4       | EPGSD      | 0.0062 |
| 108 | Kalsel   | Hulu Sungai Tengah  | 0.7   | 18.2   | 5.5     | 4.0  | 4.2   | 6.5       | EPGST      | 0.0222 |
| 109 | Kalsel   | Hulu Sungai Utara   | 2.1   | (2.2)  | (140.1) | 2.4  | 3.2   | (26.9)    | EPGSR      | 0.0016 |
| 110 | Kalsel   | Tabalong            | 13.8  | 9.3    | 8.4     | 8.9  | 5.7   | 9.2       | EPGST      | 0.0222 |
| 111 | Kalsel   | Tanah Laut          | 4.3   | 6.7    | 3.9     | 4.1  | 4.9   | 4.8       | EPGSD      | 0.0062 |
| 112 | Kalsel   | Tapin               | 0.2   | 26.9   | 4.0     | 4.0  | 3.9   | 7.8       | EPGST      | 0.0222 |
| 113 | Kaltim   | Berau               | 6.9   | 12.6   | 6.2     | 7.4  | 6.7   | 8.0       | EPGST      | 0.0222 |
| 114 | Kaltim   | Kutai Kertanegara   | 7.5   | (60.0) | 11.7    | 6.8  | 6.4   | (5.5)     | EPGSR      | 0.0016 |
| 115 | Kaltim   | Pasir               | 3.5   | 4.2    | (37.2)  | 4.7  | 4.2   | (4.1)     | EPGSR      | 0.0016 |
| 116 | Kaltim   | Kab.Bulungan        | 5.1   | (49.6) | 22.2    | 7.5  | 12.8  | (0.4)     | EPGSR      | 0.0016 |
| 117 | Kaltim   | Kutai Timur         |       |        | 18.7    | 19.4 | (3.8) | 11.4      | EPGST      | 0.0222 |
| 118 | Kaltim   | Nunukan             |       |        | 21.1    | 12.0 | 7.9   | 13.7      | EPGST      | 0.0222 |
| 119 | Sulut    | Minahasa            | 6.6   | 7.2    | 6.2     | 4.7  | 5.4   | 6.0       | EPGT       | 0.0133 |
| 120 | Sulut    | Sangihe Talaut      | 3.8   | 4.6    | 4.9     | 4.7  | 4.5   | 4.5       | EPGSD      | 0.0062 |

| NO          | PROPINSI  | KABUPATEN            | 1999   | 2000   | 2001   | 2002   | 2003   | Rata-Rata | Intensitas | Score  |
|-------------|-----------|----------------------|--------|--------|--------|--------|--------|-----------|------------|--------|
| 121         | Gorontalo | Gorontalo            | 3.1    | (34.5) | (18.7) | 5.9    | 6.3    | (7.6)     | EPGSR      | 0.0016 |
| 122         | Sulteng   | Banggai              | 3.3    | 3.5    | 4.8    | 6.4    | 6.5    | 4.9       | EPGSD      | 0.0062 |
| 123         | Sulteng   | Toli Toli            | 2.9    | 12.7   | 5.6    | 6.3    | 5.1    | 6.5       | EPGST      | 0.0222 |
| 124         | Sulteng   | Donggala             | 3.4    | 4.8    | 6.0    | (64.0) | 6.0    | (8.7)     | EPGSR      | 0.0016 |
| 125         | Sulteng   | Morowali             | 4.8    | 3.9    | 6.6    | 5.8    | 6.9    | 5.6       | EPGT       | 0.0133 |
| 126         | Sulteng   | Poso                 | 2.1    | (4.8)  |        |        | (35.5) | (12.7)    | EPGSR      | 0.0016 |
| 127         | Sultra    | Buton                | 3.2    | 5.0    | 5.1    | (49.9) | (96.9) | (26.7)    | EPGSR      | 0.0016 |
| 128         | Sultra    | Kolaka               | (0.9)  | 6.6    | 4.7    | 7.3    | (19.6) | (0.4)     | EPGSR      | 0.0016 |
| 129         | Sulsel    | Gowa                 | 3.8    | 4.3    | 4.3    | 4.2    | 4.0    | 4.1       | EPGSD      | 0.0062 |
| 130         | Sulsel    | Takalar              | 3.1    | 4.1    | 4.0    | 4.0    | 4.0    | 3.8       | EPGSD      | 0.0062 |
| 131         | Sulsel    | Jeneponto            | 3.1    | 3.6    | 2.9    | 4.0    | 4.3    | 3.6       | EPGSD      | 0.0062 |
| 132         | Sulsel    | Bantaeng             | 3.3    | 5.3    | 4.8    | 5.0    | 5.0    | 4.7       | EPGSD      | 0.0062 |
| 133         | Sulsel    | Sinjai               | 3.2    | 2.3    | 4.0    | 4.2    | 4.7    | 3.7       | EPGSD      | 0.0062 |
| 134         | Sulsel    | Selayar              | 1.4    | 3.1    | 2.5    | 3.8    | 4.1    | 3.0       | EPGSD      | 0.0062 |
| 135         | Sulsel    | Bone                 | 2.0    | 2.7    | 3.3    | 4.7    | 4.9    | 3.5       | EPGSD      | 0.0062 |
| 136         | Sulsel    | Maros                | 3.7    | 68.3   | 4.6    | 2.3    | 3.7    | 16.5      | EPGST      | 0.0222 |
| 137         | Sulsel    | Pangkep              | 5.9    | 5.0    | 4.5    | 5.2    | 5.9    | 5.3       | EPGSD      | 0.0062 |
| 138         | Sulsel    | Barru                | 5.6    | (0.4)  | 4.4    | 4.2    | 5.0    | 3.7       | EPGSD      | 0.0062 |
| 139         | Sulsel    | Pinrang              | 1.0    | 4.5    | 4.7    | 2.5    | 4.2    | 3.4       | EPGSD      | 0.0062 |
| 140         | Sulsel    | Majene               | 4.1    | 2.0    | 3.6    | 2.4    | 2.6    | 3.0       | EPGSD      | 0.0062 |
| 141         | Sulsel    | Enrekang             | 4.8    | 3.6    | 4.5    | 4.7    | 5.4    | 4.6       | EPGSD      | 0.0062 |
| 142         | Sulsel    | Tanah Toraja         | 1.0    | 2.5    | 3.9    | 4.1    | 2.7    | 2.8       | EPGSD      | 0.0062 |
| 143         | Sulsel    | Luwu                 | (64.7) | 11.4   | 7.4    | 4.3    | 7.9    | (6.7)     | EPGSR      | 0.0016 |
| 144         | Sulsel    | Luwu Utara           | 16.1   | 4.9    | 9.2    | 6.3    | 4.7    | 8.2       | EPGST      | 0.0222 |
| 145         | NTB       | Bima                 | 3.0    | (14.8) | 4.1    | (24.9) | 4.7    | (5.6)     | EPGSR      | 0.0016 |
| 146         | NTB       | Lombok Barat         | 1.6    | (13.9) | 4.1    | 4.3    | 4.0    | 0.0       | EPGSR      | 0.0016 |
| 147         | NTB       | Dompu                | 7.3    | (13.8) | 4.7    | 3.8    | 5.2    | 1.5       | EPGR       | 0.0030 |
| 148         | NTB       | Lombok Timur         | 2.3    | (17.7) | 2.4    | 2.7    | 3.8    | (1.3)     | EPGSR      | 0.0016 |
| 149         | NTT       | Ende                 | 5.8    | 4.8    | 5.0    | 6.6    | 5.0    | 5.4       | EPGSD      | 0.0062 |
| 150         | NTT       | Flores Timur         | 12.2   | (17.1) | 5.6    | 6.2    | 6.0    | 2.6       | EPGSD      | 0.0062 |
| 151         | NTT       | Manggarai            | 1.8    | 3.9    | 4.6    | (30.2) | 3.8    | (3.2)     | EPGSR      | 0.0016 |
| 152         | NTT       | Ngada                | 6.0    | 5.0    | 5.7    | 4.9    | 4.8    | 5.3       | EPGSD      | 0.0062 |
| 153         | NTT       | Timor Tengah Selatan | 8.7    | 4.6    | 5.2    | 6.2    | 5.5    | 6.0       | EPGT       | 0.0133 |
| 154         | NTT       | Timor Tengah Utara   | (2.7)  | 3.7    | 4.4    | 5.8    | 5.3    | 3.3       | EPGSD      | 0.0062 |
| 155         | NTT       | Belu                 | 4.2    | 3.0    | 4.1    | 5.9    | 6.3    | 4.7       | EPGSD      | 0.0062 |
| 156         | NTT       | Sumba Barat          | 0.4    | 3.0    | 4.3    | 5.4    | 4.9    | 3.6       | EPGSD      | 0.0062 |
| 157         | Irjabar   | Fakfak               | (1.4)  | (96.4) | 3.9    | 6.7    | 6.5    | (16.1)    | EPGSR      | 0.0016 |
| 158         | Irjabar   | Manokwari            | (1.0)  | 6.7    | 4.4    | 4.7    | 4.9    | 3.9       | EPGSD      | 0.0062 |
| 159         | Irjabar   | Sorong               | (23.2) | (38.0) | 5.0    | 5.9    | 6.0    | (8.8)     | EPGSR      | 0.0016 |
| 160         | Papua     | Jayawijaya           | 4.5    | 8.5    | 6.8    | 4.0    | 4.0    | 5.6       | EPGT       | 0.0133 |
| 161         | Irjabar   | Mimika               |        |        | (6.6)  | 8.7    | (0.4)  | 0.6       | EPGSR      | 0.0016 |
| Rata-rata : |           |                      | 1.9    | 6.0    | 4.5    | 4.9    | 6.5    | 4.8       |            |        |

**Keterangan :****EPG** : Ekonomi Daerah - Potensi Ekonomi - Growth/Pertumbuhan EkonomiDibelakang **EPG-ST** : Sangat Tinggi**T** : Tinggi**SD** : Sedang**R** : Rendah**SR** : Sangat Rendah

Sumber : BPS Pusat, yang telah diolah.

|           |       |       |     |     |
|-----------|-------|-------|-----|-----|
| Rata-rata | 3.8   | EPGST | 6.5 | -   |
| Standev   | 1.4   | EPGT  | 5.1 | 6.5 |
| Skew      | (0.3) | EPGSD | 2.5 | 5.1 |
| Kuortis   | 0.2   | EPGR  | 1.1 | 2.5 |
|           |       | EPGSR | -   | 1.1 |

**Lampiran 14.2 : Struktur Ekonomi Daerah/Economic Structure****Lampiran 14.2.A : Variabel Struktur Ekonomi Daerah 53 Kota***Economic Structure of 53 Cities*

| NO | PROPINSI  | KOTA             | Sektor Primer |            |        | Sektor Sekunder |            |        | Sektor Tersier |            |        |
|----|-----------|------------------|---------------|------------|--------|-----------------|------------|--------|----------------|------------|--------|
|    |           |                  | Kontribusi    | Intensitas | Score  | Kontribusi      | Intensitas | Score  | Kontribusi     | Intensitas | Score  |
| 1  | Sumut     | Binjai           | 9.28          | ESPSR      | 0.0009 | 38.59           | ESST       | 0.0043 | 43.83          | ESTT       | 0.0043 |
| 2  | Sumut     | Medan            | 4.11          | ESPSR      | 0.0009 | 28.32           | ESSSD      | 0.0023 | 62.69          | ESTST      | 0.0048 |
| 3  | Sumut     | Pematang Siantar | 4.28          | ESPSR      | 0.0009 | 41.38           | ESSST      | 0.0069 | 43.33          | ESTT       | 0.0043 |
| 4  | Sumut     | Sibolga          | 25.72         | ESPR       | 0.0016 | 28.70           | ESSSD      | 0.0023 | 41.09          | ESTT       | 0.0043 |
| 5  | Sumut     | Tanjung Balai    | 26.59         | ESPR       | 0.0016 | 33.08           | ESST       | 0.0043 | 32.28          | ESTSD      | 0.0019 |
| 6  | Sumut     | Tebing Tinggi    | 7.97          | ESPSR      | 0.0009 | 34.32           | ESST       | 0.0043 | 45.89          | ESTT       | 0.0043 |
| 7  | Sumbar    | Padang           | 5.13          | ESPSR      | 0.0009 | 21.97           | ESSSD      | 0.0023 | 64.52          | ESTST      | 0.0048 |
| 8  | Sumbar    | Sawahlunto       | 36.79         | ESPSD      | 0.0042 | 17.39           | ESSSD      | 0.0023 | 34.22          | ESTSD      | 0.0019 |
| 9  | Riau      | Pekanbaru        | 1.35          | ESPSR      | 0.0009 | 22.39           | ESSSD      | 0.0023 | 62.49          | ESTST      | 0.0048 |
| 10 | Riau      | Dumai            | 2.31          | ESPSR      | 0.0009 | 77.75           | ESSST      | 0.0069 | 16.30          | ESTSR      | 0.0004 |
| 11 | Kep. Riau | Tanjung Pinang   | 15.23         | ESPSR      | 0.0009 | 27.05           | ESSSD      | 0.0023 | 49.55          | ESTST      | 0.0048 |
| 12 | Kep. Riau | Batam            | 2.43          | ESPSR      | 0.0009 | 75.48           | ESSST      | 0.0069 | 21.26          | ESTR       | 0.0008 |
| 13 | Jambi     | Jambi            | 11.51         | ESPSR      | 0.0009 | 25.35           | ESSSD      | 0.0023 | 47.03          | ESTST      | 0.0048 |
| 14 | Sumsel    | Palembang        | 0.57          | ESPSR      | 0.0009 | 45.68           | ESSST      | 0.0069 | 45.17          | ESTT       | 0.0043 |
| 15 | Babel     | Pangkal Pinang   | 15.61         | ESPSR      | 0.0009 | 22.28           | ESSSD      | 0.0023 | 56.01          | ESTST      | 0.0048 |
| 16 | Bengkulu  | Bengkulu         | 7.83          | ESPSR      | 0.0009 | 12.90           | ESSR       | 0.0010 | 64.01          | ESTST      | 0.0048 |
| 17 | Lampung   | Bandar Lampung   | 3.40          | ESPSR      | 0.0009 | 34.64           | ESST       | 0.0043 | 48.09          | ESTST      | 0.0048 |
| 18 | Banten    | Cilegon          | 2.93          | ESPSR      | 0.0009 | 72.55           | ESSST      | 0.0069 | 23.80          | ESTR       | 0.0008 |
| 19 | Banten    | Tangerang        | 0.20          | ESPSR      | 0.0009 | 61.42           | ESSST      | 0.0069 | 37.88          | ESTSD      | 0.0019 |
| 20 | DKI       | Jakarta          | 0.19          | ESPSR      | 0.0009 | 34.81           | ESST       | 0.0043 | 61.51          | ESTST      | 0.0048 |
| 21 | Jabar     | Bekasi           | 1.24          | ESPSR      | 0.0009 | 52.62           | ESSST      | 0.0069 | 43.47          | ESTT       | 0.0043 |
| 22 | Jabar     | Bogor            | 0.40          | ESPSR      | 0.0009 | 38.00           | ESST       | 0.0043 | 59.46          | ESTST      | 0.0048 |
| 23 | Jabar     | Bandung          | 0.38          | ESPSR      | 0.0009 | 37.98           | ESST       | 0.0043 | 54.13          | ESTST      | 0.0048 |
| 24 | Jabar     | Sukabumi         | 4.35          | ESPSR      | 0.0009 | 12.63           | ESSR       | 0.0010 | 71.63          | ESTST      | 0.0048 |
| 25 | Jabar     | Cirebon          | 0.30          | ESPSR      | 0.0009 | 42.63           | ESSST      | 0.0069 | 53.34          | ESTST      | 0.0048 |
| 26 | Jateng    | Semarang         | 1.32          | ESPSR      | 0.0009 | 34.64           | ESST       | 0.0043 | 53.85          | ESTST      | 0.0048 |
| 27 | Jateng    | Tegal            | 11.70         | ESPSR      | 0.0009 | 31.82           | ESST       | 0.0043 | 49.60          | ESTST      | 0.0048 |
| 28 | Jateng    | Pekalongan       | 11.78         | ESPSR      | 0.0009 | 37.58           | ESST       | 0.0043 | 41.72          | ESTT       | 0.0043 |
| 29 | Jateng    | Surakarta        | 1.63          | ESPSR      | 0.0009 | 41.56           | ESSST      | 0.0069 | 49.15          | ESTST      | 0.0048 |
| 30 | DIY       | Yogyakarta       | 0.79          | ESPSR      | 0.0009 | 19.88           | ESSSD      | 0.0023 | 64.58          | ESTST      | 0.0048 |
| 31 | Jatim     | Kediri           | 0.18          | ESPSR      | 0.0009 | 78.52           | ESSST      | 0.0069 | 20.99          | ESTR       | 0.0008 |
| 32 | Jatim     | Malang           | 0.67          | ESPSR      | 0.0009 | 41.98           | ESSST      | 0.0069 | 54.15          | ESTST      | 0.0048 |
| 33 | Jatim     | Madiun           | 2.37          | ESPSR      | 0.0009 | 43.37           | ESSST      | 0.0069 | 48.00          | ESTST      | 0.0048 |
| 34 | Jatim     | Mojokerto        | 1.30          | ESPSR      | 0.0009 | 27.49           | ESSSD      | 0.0023 | 61.24          | ESTST      | 0.0048 |
| 35 | Jatim     | Surabaya         | 0.21          | ESPSR      | 0.0009 | 44.91           | ESSST      | 0.0069 | 53.12          | ESTST      | 0.0048 |
| 36 | Jatim     | Probolinggo      | 10.20         | ESPSR      | 0.0009 | 24.66           | ESSSD      | 0.0023 | 60.30          | ESTST      | 0.0048 |
| 37 | Bali      | Denpasar         | 8.16          | ESPSR      | 0.0009 | 18.98           | ESSSD      | 0.0023 | 69.58          | ESTST      | 0.0048 |
| 38 | Kalbar    | Pontianak        | 0.69          | ESPSR      | 0.0009 | 17.70           | ESSSD      | 0.0023 | 56.14          | ESTST      | 0.0048 |
| 39 | Kalteng   | Palangkaraya     | 8.98          | ESPSR      | 0.0009 | 17.69           | ESSSD      | 0.0023 | 46.46          | ESTT       | 0.0043 |
| 40 | Kalsel    | Banjarmasin      | 1.55          | ESPSR      | 0.0009 | 34.58           | ESST       | 0.0043 | 60.49          | ESTST      | 0.0048 |
| 41 | Kaltim    | Balikpapan       | 7.98          | ESPSR      | 0.0009 | 44.33           | ESSST      | 0.0069 | 45.72          | ESTT       | 0.0043 |
| 42 | Kaltim    | Samarinda        | 7.10          | ESPSR      | 0.0009 | 31.26           | ESST       | 0.0043 | 49.89          | ESTST      | 0.0048 |
| 43 | Sulut     | Bitung           | 11.88         | ESPSR      | 0.0009 | 36.60           | ESST       | 0.0043 | 47.59          | ESTST      | 0.0048 |
| 44 | Sulut     | Manado           | 3.79          | ESPSR      | 0.0009 | 20.76           | ESSSD      | 0.0023 | 54.59          | ESTST      | 0.0048 |
| 45 | Gorontalo | Gorontalo        | 11.05         | ESPSR      | 0.0009 | 15.27           | ESSSD      | 0.0023 | 47.54          | ESTST      | 0.0048 |
| 46 | Sulteng   | Palu             | 8.98          | ESPSR      | 0.0009 | 31.24           | ESST       | 0.0043 | 38.63          | ESTSD      | 0.0019 |
| 47 | Sultra    | Kendari          | 20.95         | ESPR       | 0.0016 | 17.62           | ESSSD      | 0.0023 | 50.37          | ESTST      | 0.0048 |
| 48 | Sulsel    | Makasar          | 2.24          | ESPSR      | 0.0009 | 35.15           | ESST       | 0.0043 | 49.99          | ESTST      | 0.0048 |
| 49 | Sulsel    | Pare Pare        | 8.58          | ESPSR      | 0.0009 | 14.23           | ESSSD      | 0.0023 | 67.18          | ESTST      | 0.0048 |
| 50 | NTB       | Mataram          | 4.17          | ESPSR      | 0.0009 | 20.61           | ESSSD      | 0.0023 | 63.97          | ESTST      | 0.0048 |
| 51 | NTT       | Kupang           | 5.39          | ESPSR      | 0.0009 | 12.48           | ESSR       | 0.0010 | 52.66          | ESTST      | 0.0048 |
| 52 | Irjabar   | Sorong           | 8.15          | ESPSR      | 0.0009 | 38.43           | ESST       | 0.0043 | 44.50          | ESTT       | 0.0043 |
| 53 | Papua     | Jayapura         | 8.60          | ESPSR      | 0.0009 | 21.49           | ESSSD      | 0.0023 | 44.93          | ESTT       | 0.0043 |

**Keterangan :****ESP** : Ekonomi Daerah - Struktur Ekonomi - Sektor Primer**ESS** : Ekonomi Daerah - Struktur Ekonomi - Sektor Sekunder**EST** : Ekonomi Daerah - Struktur Ekonomi - Sektor TersierDibelakang **ESP/ESS/EST - ST** : Sangat Tinggi**T** : Tinggi**SD** : Sedang**R** : Rendah**SR** : Sangat Rendah

|           |       |      |           |      |      |           |       |      |
|-----------|-------|------|-----------|------|------|-----------|-------|------|
| Rata-rata | 39.2  |      | Rata-rata | 22.4 |      | Rata-rata | 31.5  |      |
| Standev   | 22.9  |      | Standev   | 16.4 |      | Standev   | 5.2   |      |
| Skew      | (0.8) |      | Skew      | 0.6  |      | Skew      | (0.3) |      |
| Kuortis   | (0.6) |      | Kuortis   | 1.9  |      | Kuortis   | (0.1) |      |
| ESPST     | 62.0  | -    | ESSST     | 38.7 | -    | ESTST     | 46.6  | -    |
| ESPT      | 50.6  | 62.0 | ESST      | 30.5 | 38.7 | ESTT      | 39.1  | 46.6 |
| ESPST     | 27.7  | 50.6 | ESSSD     | 14.2 | 30.5 | ESTSD     | 23.9  | 39.1 |
| ESPR      | 16.3  | 27.7 | ESSR      | 6.0  | 14.2 | ESTR      | 16.3  | 23.9 |
| ESPST     | -     | 16.3 | ESSSR     | -    | 6.0  | ESTSR     | -     | 16.3 |

PDRB Atas Dasar Harga Berlaku (Tahun 2003) - Untuk Sektor Tersier, Sub Sektor Jasa Pemerintahan dihilangkan

Sumber : BPS Pusat yang diolah.

**Lampiran 14.2.B : Variabel Struktur Ekonomi Daerah 161 Kabupaten**  
*Economic Structure of 161 Regencies*

| NO | PROPINSI | KABUPATEN            | Sektor Primer |            |        | Sektor Sekunder |            |        | Sektor Tersier |            |        |
|----|----------|----------------------|---------------|------------|--------|-----------------|------------|--------|----------------|------------|--------|
|    |          |                      | Kontribusi    | Intensitas | Score  | Kontribusi      | Intensitas | Score  | Kontribusi     | Intensitas | Score  |
| 1  | Sumut    | Asahan               | 36.15         | ESPSD      | 0.0042 | 43.75           | ESSST      | 0.0069 | 18.14          | ESTR       | 0.0008 |
| 2  | Sumut    | Dairi                | 69.18         | ESPST      | 0.0076 | 6.87            | ESSR       | 0.0010 | 19.72          | ESTR       | 0.0008 |
| 3  | Sumut    | Deliserdang          | 37.36         | ESPSD      | 0.0042 | 38.14           | ESST       | 0.0043 | 20.91          | ESTR       | 0.0008 |
| 4  | Sumut    | Langkat              | 63.03         | ESPST      | 0.0076 | 16.65           | ESSSD      | 0.0023 | 16.88          | ESTR       | 0.0008 |
| 5  | Sumut    | Simalungun           | 60.04         | ESPT       | 0.0076 | 18.49           | ESSSD      | 0.0023 | 13.73          | ESTSR      | 0.0004 |
| 6  | Sumut    | Karo                 | 65.55         | ESPST      | 0.0076 | 4.84            | ESSSR      | 0.0006 | 21.46          | ESTR       | 0.0008 |
| 7  | Sumut    | Labuhan Batu         | 36.88         | ESPST      | 0.0042 | 45.78           | ESSST      | 0.0069 | 15.77          | ESTSR      | 0.0004 |
| 8  | Sumut    | Tapaneli Utara       | 60.29         | ESPT       | 0.0076 | 8.03            | ESSR       | 0.0010 | 20.34          | ESTR       | 0.0008 |
| 9  | Sumbar   | Pesisir Selatan      | 32.77         | ESPSD      | 0.0042 | 18.26           | ESSSD      | 0.0023 | 31.73          | ESTSD      | 0.0019 |
| 10 | Sumbar   | Sawahlunto/Sijunjung | 44.79         | ESPSD      | 0.0042 | 14.48           | ESSSD      | 0.0023 | 24.10          | ESTSD      | 0.0019 |
| 11 | Sumbar   | Pasaman              | 46.12         | ESPSD      | 0.0042 | 12.65           | ESSR       | 0.0010 | 24.51          | ESTSD      | 0.0019 |
| 12 | Sumbar   | Solok                | 46.98         | ESPSD      | 0.0042 | 13.01           | ESSR       | 0.0010 | 28.10          | ESTSD      | 0.0019 |
| 13 | Riau     | Bengkalis            | 86.60         | ESPST      | 0.0076 | 7.17            | ESSR       | 0.0010 | 4.93           | ESTSR      | 0.0004 |
| 14 | Riau     | Indragiri Hilir      | 51.87         | ESPT       | 0.0076 | 13.96           | ESSR       | 0.0010 | 25.39          | ESTSD      | 0.0019 |
| 15 | Riau     | Kampar               | 84.79         | ESPST      | 0.0076 | 4.10            | ESSSR      | 0.0006 | 7.82           | ESTSR      | 0.0004 |
| 16 | Riau     | Kuantan Sengigi      | 60.12         | ESPT       | 0.0076 | 12.46           | ESSR       | 0.0010 | 15.18          | ESTSR      | 0.0004 |
| 17 | Riau     | Pelalawan            | 59.86         | ESPT       | 0.0076 | 22.43           | ESSSD      | 0.0023 | 13.29          | ESTSR      | 0.0004 |
| 18 | Riau     | Rokan Hulu           | 70.16         | ESPST      | 0.0076 | 9.30            | ESSR       | 0.0010 | 11.14          | ESTSR      | 0.0004 |
| 19 | Jambi    | Batanghari           | 44.95         | ESPSD      | 0.0042 | 19.81           | ESSSD      | 0.0023 | 26.16          | ESTSD      | 0.0019 |
| 20 | Jambi    | Bungo                | 46.63         | ESPSD      | 0.0042 | 9.96            | ESSR       | 0.0010 | 33.00          | ESTSD      | 0.0019 |
| 21 | Jambi    | Kerinci              | 45.78         | ESPSD      | 0.0042 | 7.79            | ESSR       | 0.0010 | 35.53          | ESTSD      | 0.0019 |
| 22 | Jambi    | Tanjung Jabung Timur | 72.04         | ESPST      | 0.0076 | 7.80            | ESSR       | 0.0010 | 16.68          | ESTR       | 0.0008 |
| 23 | Jambi    | Tebo                 | 57.65         | ESPT       | 0.0076 | 8.71            | ESSR       | 0.0010 | 24.09          | ESTSD      | 0.0019 |
| 24 | Sumsel   | Muara Enim           | 84.56         | ESPST      | 0.0076 | 5.40            | ESSSR      | 0.0006 | 7.45           | ESTSR      | 0.0004 |
| 25 | Sumsel   | Musi Banyuasin       | 59.19         | ESPT       | 0.0076 | 19.31           | ESSSD      | 0.0023 | 18.90          | ESTR       | 0.0008 |
| 26 | Sumsel   | Musi Rawas           | 75.50         | ESPST      | 0.0076 | 12.83           | ESSR       | 0.0010 | 7.22           | ESTSR      | 0.0004 |
| 27 | Sumsel   | Ogan Komering Ilir   | 45.54         | ESPSD      | 0.0042 | 20.61           | ESSSD      | 0.0023 | 27.42          | ESTSD      | 0.0019 |
| 28 | Sumsel   | Lahat                | 48.27         | ESPSD      | 0.0042 | 20.21           | ESSSD      | 0.0023 | 23.83          | ESTR       | 0.0008 |
| 29 | Babel    | Bangka               | 51.90         | ESPT       | 0.0076 | 24.33           | ESSSD      | 0.0023 | 18.95          | ESTR       | 0.0008 |
| 30 | Babel    | Belitung             | 29.33         | ESPSD      | 0.0042 | 30.33           | ESSSD      | 0.0023 | 33.85          | ESTSD      | 0.0019 |
| 31 | Bengkulu | Bengkulu Selatan     | 30.99         | ESPSD      | 0.0042 | 12.64           | ESSR       | 0.0010 | 35.22          | ESTSD      | 0.0019 |
| 32 | Bengkulu | Rejang Lebong        | 58.36         | ESPT       | 0.0076 | 8.52            | ESSR       | 0.0010 | 19.80          | ESTR       | 0.0008 |
| 33 | Bengkulu | Bengkulu Utara       | 46.87         | ESPSD      | 0.0042 | 19.97           | ESSSD      | 0.0023 | 19.55          | ESTR       | 0.0008 |
| 34 | Lampung  | Lampung Barat        | 62.08         | ESPST      | 0.0076 | 8.31            | ESSR       | 0.0010 | 24.47          | ESTSD      | 0.0019 |
| 35 | Lampung  | Lampung Selatan      | 49.16         | ESPSD      | 0.0042 | 18.66           | ESSSD      | 0.0023 | 24.09          | ESTSD      | 0.0019 |
| 36 | Lampung  | Lampung Timur        | 65.22         | ESPST      | 0.0076 | 9.87            | ESSR       | 0.0010 | 18.97          | ESTR       | 0.0008 |
| 37 | Lampung  | Lampung Utara        | 54.81         | ESPT       | 0.0076 | 8.43            | ESSR       | 0.0010 | 23.49          | ESTR       | 0.0008 |
| 38 | Lampung  | Way Kanan            | 53.68         | ESPT       | 0.0076 | 10.78           | ESSR       | 0.0010 | 23.39          | ESTR       | 0.0008 |
| 39 | Banten   | Lebak                | 40.86         | ESPSD      | 0.0042 | 13.58           | ESSR       | 0.0010 | 37.61          | ESTSD      | 0.0019 |
| 40 | Banten   | Serang               | 14.37         | ESPSR      | 0.0009 | 60.86           | ESSST      | 0.0069 | 19.95          | ESTR       | 0.0008 |
| 41 | Banten   | Tangerang            | 9.93          | ESPSR      | 0.0009 | 63.86           | ESSST      | 0.0069 | 24.48          | ESTSD      | 0.0019 |
| 42 | Jabar    | Bekasi               | 2.65          | ESPSR      | 0.0009 | 84.48           | ESSST      | 0.0069 | 12.04          | ESTSR      | 0.0004 |
| 43 | Jabar    | Bogor                | 12.49         | ESPSR      | 0.0009 | 58.00           | ESSST      | 0.0069 | 26.98          | ESTSD      | 0.0019 |
| 44 | Jabar    | Ciamis               | 31.64         | ESPSD      | 0.0042 | 18.12           | ESSSD      | 0.0023 | 44.83          | ESTT       | 0.0043 |
| 45 | Jabar    | Tasikmalaya          | 38.29         | ESPSD      | 0.0042 | 14.06           | ESSR       | 0.0010 | 40.20          | ESTT       | 0.0043 |
| 46 | Jabar    | Garut                | 40.43         | ESPSD      | 0.0042 | 13.39           | ESSR       | 0.0010 | 41.06          | ESTT       | 0.0043 |
| 47 | Jabar    | Sumedang             | 32.82         | ESPSD      | 0.0042 | 21.55           | ESSSD      | 0.0023 | 37.79          | ESTSD      | 0.0019 |
| 48 | Jabar    | Bandung              | 10.13         | ESPSR      | 0.0009 | 59.67           | ESSST      | 0.0069 | 27.86          | ESTSD      | 0.0019 |
| 49 | Jabar    | Cianjur              | 46.89         | ESPSD      | 0.0042 | 6.27            | ESSR       | 0.0010 | 40.59          | ESTT       | 0.0043 |
| 50 | Jabar    | Sukabumi             | 43.01         | ESPSD      | 0.0042 | 19.63           | ESSSD      | 0.0023 | 29.22          | ESTSD      | 0.0019 |
| 51 | Jabar    | Cirebon              | 35.99         | ESPSD      | 0.0042 | 20.09           | ESSSD      | 0.0023 | 37.67          | ESTSD      | 0.0019 |
| 52 | Jabar    | Kuningan             | 40.61         | ESPSD      | 0.0042 | 9.63            | ESSR       | 0.0010 | 39.33          | ESTT       | 0.0043 |
| 53 | Jabar    | Indramayu            | 74.03         | ESPST      | 0.0076 | 3.45            | ESSSR      | 0.0006 | 20.46          | ESTR       | 0.0008 |
| 54 | Jabar    | Purwakarta           | 10.71         | ESPSR      | 0.0009 | 48.90           | ESSST      | 0.0069 | 36.45          | ESTSD      | 0.0019 |
| 55 | Jabar    | Karawang             | 19.99         | ESPR       | 0.0016 | 41.70           | ESSST      | 0.0069 | 34.39          | ESTSD      | 0.0019 |
| 56 | Jabar    | Subang               | 41.68         | ESPSD      | 0.0042 | 8.98            | ESSR       | 0.0010 | 39.13          | ESTT       | 0.0043 |
| 57 | Jateng   | Kendal               | 25.03         | ESPR       | 0.0016 | 43.71           | ESSST      | 0.0069 | 24.21          | ESTSD      | 0.0019 |
| 58 | Jateng   | Pekalongan           | 20.12         | ESPR       | 0.0016 | 36.74           | ESST       | 0.0043 | 33.22          | ESTSD      | 0.0019 |
| 59 | Jateng   | Pemalang             | 36.18         | ESPSD      | 0.0042 | 22.98           | ESSSD      | 0.0023 | 34.43          | ESTSD      | 0.0019 |

| NO  | PROPINSI | KABUPATEN           | Sektor Primer |            |        | Sektor Sekunder |            |        | Sektor Tersier |            |        |
|-----|----------|---------------------|---------------|------------|--------|-----------------|------------|--------|----------------|------------|--------|
|     |          |                     | Kontribusi    | Intensitas | Score  | Kontribusi      | Intensitas | Score  | Kontribusi     | Intensitas | Score  |
| 60  | Jateng   | Tegal               | 23.45         | ESPR       | 0.0016 | 30.56           | ESST       | 0.0043 | 39.20          | ESTT       | 0.0043 |
| 61  | Jateng   | Jepara              | 25.08         | ESPR       | 0.0016 | 31.48           | ESST       | 0.0043 | 36.38          | ESTSD      | 0.0019 |
| 62  | Jateng   | Kudus               | 3.77          | ESPSR      | 0.0009 | 65.51           | ESSST      | 0.0069 | 29.43          | ESTSD      | 0.0019 |
| 63  | Jateng   | Banyumas            | 28.75         | ESPSD      | 0.0042 | 26.07           | ESSSD      | 0.0023 | 34.74          | ESTSD      | 0.0019 |
| 64  | Jateng   | Cilacap             | 10.73         | ESPSR      | 0.0009 | 52.75           | ESSST      | 0.0069 | 34.87          | ESTSD      | 0.0019 |
| 65  | Jateng   | Wonosobo            | 45.39         | ESPSD      | 0.0042 | 14.72           | ESSSD      | 0.0023 | 30.74          | ESTSD      | 0.0019 |
| 66  | Jateng   | Kebumen             | 47.05         | ESPSD      | 0.0042 | 12.50           | ESSR       | 0.0010 | 29.85          | ESTSD      | 0.0019 |
| 67  | Jateng   | Boyolali            | 40.51         | ESPSD      | 0.0042 | 14.66           | ESSSD      | 0.0023 | 38.73          | ESTSD      | 0.0019 |
| 68  | Jateng   | Sukoharjo           | 26.37         | ESPR       | 0.0016 | 33.50           | ESST       | 0.0043 | 32.48          | ESTSD      | 0.0019 |
| 69  | Jateng   | Karanganyar         | 24.02         | ESPR       | 0.0016 | 44.74           | ESSST      | 0.0069 | 20.11          | ESTR       | 0.0008 |
| 70  | Jateng   | Klaten              | 23.35         | ESPR       | 0.0016 | 32.46           | ESST       | 0.0043 | 36.13          | ESTSD      | 0.0019 |
| 71  | Jateng   | Magelang            | 35.47         | ESPSD      | 0.0042 | 24.14           | ESSSD      | 0.0023 | 26.14          | ESTSD      | 0.0019 |
| 72  | DIY      | Bantul              | 29.03         | ESPSD      | 0.0042 | 27.36           | ESSSD      | 0.0023 | 32.08          | ESTSD      | 0.0019 |
| 73  | DIY      | Gunung Kidul        | 40.76         | ESPSD      | 0.0042 | 19.84           | ESSSD      | 0.0023 | 27.27          | ESTSD      | 0.0019 |
| 74  | Jatim    | Blitar              | 42.22         | ESPSD      | 0.0042 | 6.58            | ESSR       | 0.0010 | 43.57          | ESTT       | 0.0043 |
| 75  | Jatim    | Kediri              | 42.64         | ESPSD      | 0.0042 | 14.42           | ESSSD      | 0.0023 | 35.31          | ESTSD      | 0.0019 |
| 76  | Jatim    | Magetan             | 39.52         | ESPSD      | 0.0042 | 16.99           | ESSSD      | 0.0023 | 30.22          | ESTSD      | 0.0019 |
| 77  | Jatim    | Ponorogo            | 32.79         | ESPSD      | 0.0042 | 20.62           | ESSSD      | 0.0023 | 38.87          | ESTSD      | 0.0019 |
| 78  | Jatim    | Tulungagung         | 22.46         | ESPR       | 0.0016 | 23.06           | ESSSD      | 0.0023 | 46.91          | ESTST      | 0.0048 |
| 79  | Jatim    | Mojokerto           | 28.31         | ESPSD      | 0.0042 | 34.54           | ESST       | 0.0043 | 32.19          | ESTSD      | 0.0019 |
| 80  | Jatim    | Pamekasan           | 60.82         | ESPT       | 0.0076 | 6.70            | ESSR       | 0.0010 | 22.55          | ESTR       | 0.0008 |
| 81  | Jatim    | Bangsalan           | 40.05         | ESPSD      | 0.0042 | 11.01           | ESSR       | 0.0010 | 41.13          | ESTT       | 0.0043 |
| 82  | Jatim    | Pasuruhan           | 29.65         | ESPSD      | 0.0042 | 37.49           | ESST       | 0.0043 | 27.80          | ESTSD      | 0.0019 |
| 83  | Jatim    | Sidoarjo            | 7.19          | ESPSR      | 0.0009 | 55.04           | ESSST      | 0.0069 | 35.68          | ESTSD      | 0.0019 |
| 84  | Jatim    | Gresik              | 13.17         | ESPSR      | 0.0009 | 59.27           | ESSST      | 0.0069 | 26.44          | ESTSD      | 0.0019 |
| 85  | Jatim    | Jombang             | 36.97         | ESPSD      | 0.0042 | 17.10           | ESSSD      | 0.0023 | 38.43          | ESTSD      | 0.0019 |
| 86  | Jatim    | Lamongan            | 50.17         | ESPSD      | 0.0042 | 9.24            | ESSR       | 0.0010 | 31.23          | ESTSD      | 0.0019 |
| 87  | Jatim    | Banyuwangi          | 52.93         | ESPT       | 0.0076 | 6.50            | ESSR       | 0.0010 | 37.15          | ESTSD      | 0.0019 |
| 88  | Jatim    | Bondowoso           | 49.66         | ESPSD      | 0.0042 | 11.89           | ESSR       | 0.0010 | 32.58          | ESTSD      | 0.0019 |
| 89  | Jatim    | Situbondo           | 32.58         | ESPSD      | 0.0042 | 14.45           | ESSSD      | 0.0023 | 47.92          | ESTST      | 0.0048 |
| 90  | Jatim    | Jember              | 48.88         | ESPSD      | 0.0042 | 12.63           | ESSR       | 0.0010 | 32.97          | ESTSD      | 0.0019 |
| 91  | Bali     | Badung              | 8.08          | ESPSR      | 0.0009 | 8.73            | ESSR       | 0.0010 | 77.93          | ESTST      | 0.0048 |
| 92  | Bali     | Bangli              | 32.52         | ESPSD      | 0.0042 | 13.68           | ESSR       | 0.0010 | 42.98          | ESTT       | 0.0043 |
| 93  | Bali     | Buleleng            | 30.30         | ESPSD      | 0.0042 | 13.36           | ESSR       | 0.0010 | 44.10          | ESTT       | 0.0043 |
| 94  | Bali     | Gianyar             | 23.91         | ESPR       | 0.0016 | 23.10           | ESSSD      | 0.0023 | 43.11          | ESTT       | 0.0043 |
| 95  | Bali     | Jembrana            | 28.95         | ESPSD      | 0.0042 | 13.42           | ESSR       | 0.0010 | 49.88          | ESTST      | 0.0048 |
| 96  | Bali     | Tabanan             | 37.31         | ESPSD      | 0.0042 | 11.04           | ESSR       | 0.0010 | 42.11          | ESTT       | 0.0043 |
| 97  | Bali     | Klungkung           | 37.48         | ESPSD      | 0.0042 | 17.28           | ESSSD      | 0.0023 | 35.49          | ESTSD      | 0.0019 |
| 98  | Bali     | Karang Asem         | 35.64         | ESPSD      | 0.0042 | 12.23           | ESSR       | 0.0010 | 40.77          | ESTT       | 0.0043 |
| 99  | Kalbar   | Kapuas Hulu         | 49.42         | ESPSD      | 0.0042 | 9.71            | ESSR       | 0.0010 | 32.93          | ESTSD      | 0.0019 |
| 100 | Kalbar   | Ketapang            | 43.56         | ESPSD      | 0.0042 | 16.22           | ESSSD      | 0.0023 | 32.31          | ESTSD      | 0.0019 |
| 101 | Kalbar   | Pontianak           | 21.25         | ESPR       | 0.0016 | 45.02           | ESSST      | 0.0069 | 25.89          | ESTSD      | 0.0019 |
| 102 | Kalbar   | Sambas              | 44.00         | ESPSD      | 0.0042 | 13.97           | ESSR       | 0.0010 | 37.73          | ESTSD      | 0.0019 |
| 103 | Kalbar   | Sanggau             | 39.07         | ESPSD      | 0.0042 | 33.72           | ESST       | 0.0043 | 23.13          | ESTR       | 0.0008 |
| 104 | Kalteng  | Barito Selatan      | 45.07         | ESPSD      | 0.0042 | 14.13           | ESSR       | 0.0010 | 32.44          | ESTSD      | 0.0019 |
| 105 | Kalteng  | Barito Utara        | 54.44         | ESPT       | 0.0076 | 8.25            | ESSR       | 0.0010 | 23.71          | ESTR       | 0.0008 |
| 106 | Kalteng  | Kapuas              | 55.40         | ESPT       | 0.0076 | 12.02           | ESSR       | 0.0010 | 25.18          | ESTSD      | 0.0019 |
| 107 | Kalsel   | Hulu Sungai Selatan | 40.60         | ESPSD      | 0.0042 | 12.29           | ESSR       | 0.0010 | 29.13          | ESTSD      | 0.0019 |
| 108 | Kalsel   | Hulu Sungai Tengah  | 39.09         | ESPSD      | 0.0042 | 12.70           | ESSR       | 0.0010 | 29.19          | ESTSD      | 0.0019 |
| 109 | Kalsel   | Hulu Sungai Utara   | 31.21         | ESPSD      | 0.0042 | 16.77           | ESSSD      | 0.0023 | 33.42          | ESTSD      | 0.0019 |
| 110 | Kalsel   | Tabalong            | 78.83         | ESPST      | 0.0076 | 3.70            | ESSSR      | 0.0006 | 11.68          | ESTSR      | 0.0004 |
| 111 | Kalsel   | Tanah Laut          | 40.88         | ESPSD      | 0.0042 | 23.83           | ESSSD      | 0.0023 | 25.60          | ESTSD      | 0.0019 |
| 112 | Kalsel   | Tapin               | 53.21         | ESPT       | 0.0076 | 9.69            | ESSR       | 0.0010 | 22.46          | ESTR       | 0.0008 |
| 113 | Kaltim   | Berau               | 57.52         | ESPT       | 0.0076 | 15.83           | ESSSD      | 0.0023 | 22.79          | ESTR       | 0.0008 |
| 114 | Kaltim   | Kutai Kertanegara   | 86.82         | ESPST      | 0.0076 | 7.28            | ESSR       | 0.0010 | 4.72           | ESTSR      | 0.0004 |
| 115 | Kaltim   | Pasir               | 77.54         | ESPST      | 0.0076 | 8.28            | ESSR       | 0.0010 | 10.24          | ESTSR      | 0.0004 |
| 116 | Kaltim   | Kab.Bulungan        | 44.16         | ESPSD      | 0.0042 | 20.19           | ESSSD      | 0.0023 | 12.14          | ESTSR      | 0.0004 |
| 117 | Kaltim   | Kutai Timur         | 77.70         | ESPST      | 0.0076 | 10.86           | ESSR       | 0.0010 | 10.01          | ESTSR      | 0.0004 |
| 118 | Kaltim   | Nunukan             | 71.30         | ESPST      | 0.0076 | 11.40           | ESSR       | 0.0010 | 13.65          | ESTSR      | 0.0004 |

| NO  | PROPINSI  | KABUPATEN            | Sektor Primer |            |        | Sektor Sekunder |            |        | Sektor Tersier |            |        |
|-----|-----------|----------------------|---------------|------------|--------|-----------------|------------|--------|----------------|------------|--------|
|     |           |                      | Kontribusi    | Intensitas | Score  | Kontribusi      | Intensitas | Score  | Kontribusi     | Intensitas | Score  |
| 119 | Sulut     | Minahasa             | 31.34         | ESPSD      | 0.0042 | 24.11           | ESSSD      | 0.0023 | 30.64          | ESTSD      | 0.0019 |
| 120 | Sulut     | Sangihe Talaut       | 48.62         | ESPSD      | 0.0042 | 13.04           | ESSR       | 0.0010 | 25.53          | ESTSD      | 0.0019 |
| 121 | Gorontalo | Gorontalo            | 44.27         | ESPSD      | 0.0042 | 18.53           | ESSSD      | 0.0023 | 19.17          | ESTR       | 0.0008 |
| 122 | Sulteng   | Banggai              | 57.77         | ESPT       | 0.0076 | 15.13           | ESSSD      | 0.0023 | 19.39          | ESTR       | 0.0008 |
| 123 | Sulteng   | Toli Toli            | 57.47         | ESPT       | 0.0076 | 13.81           | ESSR       | 0.0010 | 19.96          | ESTR       | 0.0008 |
| 124 | Sulteng   | Donggala             | 56.70         | ESPT       | 0.0076 | 11.52           | ESSR       | 0.0010 | 20.95          | ESTR       | 0.0008 |
| 125 | Sulteng   | Morowali             | 65.77         | ESPST      | 0.0076 | 7.58            | ESSR       | 0.0010 | 19.20          | ESTR       | 0.0008 |
| 126 | Sulteng   | Poso                 | 49.01         | ESPSD      | 0.0042 | 15.23           | ESSSD      | 0.0023 | 26.18          | ESTSD      | 0.0019 |
| 127 | Sultra    | Buton                | 48.43         | ESPSD      | 0.0042 | 10.96           | ESSR       | 0.0010 | 22.31          | ESTR       | 0.0008 |
| 128 | Sultra    | Kolaka               | 53.13         | ESPT       | 0.0076 | 19.45           | ESSSD      | 0.0023 | 19.54          | ESTR       | 0.0008 |
| 129 | Sulsel    | Gowa                 | 49.78         | ESPSD      | 0.0042 | 10.71           | ESSR       | 0.0010 | 20.37          | ESTR       | 0.0008 |
| 130 | Sulsel    | Takalar              | 47.82         | ESPSD      | 0.0042 | 15.10           | ESSSD      | 0.0023 | 20.11          | ESTR       | 0.0008 |
| 131 | Sulsel    | Jeneponto            | 61.65         | ESPT       | 0.0076 | 7.40            | ESSR       | 0.0010 | 16.49          | ESTR       | 0.0008 |
| 132 | Sulsel    | Bantaeng             | 58.81         | ESPT       | 0.0076 | 9.55            | ESSR       | 0.0010 | 20.42          | ESTR       | 0.0008 |
| 133 | Sulsel    | Sinjai               | 66.83         | ESPST      | 0.0076 | 5.54            | ESSSR      | 0.0006 | 16.26          | ESTSR      | 0.0004 |
| 134 | Sulsel    | Selayar              | 47.92         | ESPSD      | 0.0042 | 12.33           | ESSR       | 0.0010 | 27.59          | ESTSD      | 0.0019 |
| 135 | Sulsel    | Bone                 | 64.72         | ESPST      | 0.0076 | 10.41           | ESSR       | 0.0010 | 16.03          | ESTSR      | 0.0004 |
| 136 | Sulsel    | Maros                | 52.71         | ESPT       | 0.0076 | 19.04           | ESSSD      | 0.0023 | 18.08          | ESTR       | 0.0008 |
| 137 | Sulsel    | Pangkep              | 27.34         | ESPR       | 0.0016 | 52.36           | ESSST      | 0.0069 | 12.43          | ESTSR      | 0.0004 |
| 138 | Sulsel    | Barru                | 48.88         | ESPSD      | 0.0042 | 12.53           | ESSR       | 0.0010 | 24.67          | ESTSD      | 0.0019 |
| 139 | Sulsel    | Pinrang              | 65.56         | ESPST      | 0.0076 | 8.23            | ESSR       | 0.0010 | 16.53          | ESTR       | 0.0008 |
| 140 | Sulsel    | Majene               | 56.07         | ESPT       | 0.0076 | 9.26            | ESSR       | 0.0010 | 22.21          | ESTR       | 0.0008 |
| 141 | Sulsel    | Enrekang             | 62.04         | ESPST      | 0.0076 | 8.67            | ESSR       | 0.0010 | 18.18          | ESTR       | 0.0008 |
| 142 | Sulsel    | Tanah Toraja         | 52.47         | ESPT       | 0.0076 | 9.34            | ESSR       | 0.0010 | 21.40          | ESTR       | 0.0008 |
| 143 | Sulsel    | Luwu                 | 61.98         | ESPT       | 0.0076 | 19.18           | ESSSD      | 0.0023 | 11.87          | ESTSR      | 0.0004 |
| 144 | Sulsel    | Luwu Utara           | 79.55         | ESPST      | 0.0076 | 3.99            | ESSSR      | 0.0006 | 9.21           | ESTSR      | 0.0004 |
| 145 | NTB       | Bima                 | 55.04         | ESPT       | 0.0076 | 9.59            | ESSR       | 0.0010 | 24.58          | ESTSD      | 0.0019 |
| 146 | NTB       | Lombok Barat         | 36.97         | ESPSD      | 0.0042 | 14.05           | ESSR       | 0.0010 | 35.72          | ESTSD      | 0.0019 |
| 147 | NTB       | Dompu                | 49.10         | ESPSD      | 0.0042 | 11.38           | ESSR       | 0.0010 | 27.68          | ESTSD      | 0.0019 |
| 148 | NTB       | Lombok Timur         | 39.58         | ESPSD      | 0.0042 | 15.99           | ESSSD      | 0.0023 | 29.09          | ESTSD      | 0.0019 |
| 149 | NTT       | Ende                 | 34.05         | ESPSD      | 0.0042 | 10.73           | ESSR       | 0.0010 | 36.37          | ESTSD      | 0.0019 |
| 150 | NTT       | Flores Timur         | 43.16         | ESPSD      | 0.0042 | 6.01            | ESSR       | 0.0010 | 24.65          | ESTSD      | 0.0019 |
| 151 | NTT       | Manggarai            | 56.16         | ESPT       | 0.0076 | 8.83            | ESSR       | 0.0010 | 18.15          | ESTR       | 0.0008 |
| 152 | NTT       | Ngada                | 54.15         | ESPT       | 0.0076 | 11.06           | ESSR       | 0.0010 | 15.83          | ESTSR      | 0.0004 |
| 153 | NTT       | Timor Tengah Selatan | 57.30         | ESPT       | 0.0076 | 6.02            | ESSR       | 0.0010 | 13.99          | ESTSR      | 0.0004 |
| 154 | NTT       | Timor Tengah Utara   | 53.44         | ESPT       | 0.0076 | 8.92            | ESSR       | 0.0010 | 15.52          | ESTSR      | 0.0004 |
| 155 | NTT       | Belu                 | 44.89         | ESPSD      | 0.0042 | 7.17            | ESSR       | 0.0010 | 30.80          | ESTSD      | 0.0019 |
| 156 | NTT       | Sumba Barat          | 60.83         | ESPT       | 0.0076 | 5.57            | ESSSR      | 0.0006 | 16.12          | ESTSR      | 0.0004 |
| 157 | Irjabar   | Fakfak               | 37.42         | ESPSD      | 0.0042 | 21.09           | ESSSD      | 0.0023 | 22.21          | ESTR       | 0.0008 |
| 158 | Irjabar   | Manokwari            | 44.57         | ESPSD      | 0.0042 | 15.22           | ESSSD      | 0.0023 | 19.45          | ESTR       | 0.0008 |
| 159 | Irjabar   | Sorong               | 77.88         | ESPST      | 0.0076 | 11.07           | ESSR       | 0.0010 | 3.22           | ESTSR      | 0.0004 |
| 160 | Papua     | Jayawijaya           | 57.50         | ESPT       | 0.0076 | 4.17            | ESSSR      | 0.0006 | 26.24          | ESTSD      | 0.0019 |
| 161 | Irjabar   | Mimika               | 97.90         | ESPST      | 0.0076 | 0.70            | ESSSR      | 0.0006 | 1.18           | ESTSR      | 0.0004 |

**Keterangan :****ESP** : Ekonomi Daerah - Struktur Ekonomi - Sektor Primer**ESS** : Ekonomi Daerah - Struktur Ekonomi - Sektor Sekunder**EST** : Ekonomi Daerah - Struktur Ekonomi - Sektor TersierDibelakang **ESP/ESS/EST - ST** : Sangat Tinggi**T** : Tinggi**SD** : Sedang**R** : Rendah**SR** : Sangat Rendah

|           |       |      |           |      |      |           |       |      |
|-----------|-------|------|-----------|------|------|-----------|-------|------|
| Rata-rata | 39.2  |      | Rata-rata | 22.4 |      | Rata-rata | 31.5  |      |
| Standev   | 22.9  |      | Standev   | 16.4 |      | Standev   | 5.2   |      |
| Skew      | (0.8) |      | Skew      | 0.6  |      | Skew      | (0.3) |      |
| Kuortis   | (0.6) |      | Kuortis   | 1.9  |      | Kuortis   | (0.1) |      |
| ESPST     | 62.0  | -    | ESSST     | 38.7 | -    | ESTST     | 46.6  | -    |
| ESPT      | 50.6  | 62.0 | ESST      | 30.5 | 38.7 | ESTT      | 39.1  | 46.6 |
| ESPSD     | 27.7  | 50.6 | ESSSD     | 14.2 | 30.5 | ESTSD     | 23.9  | 39.1 |
| ESPR      | 16.3  | 27.7 | ESSR      | 6.0  | 14.2 | ESTR      | 16.3  | 23.9 |
| ESPSR     | -     | 16.3 | ESSSR     | -    | 6.0  | ESTSR     | -     | 16.3 |

PDRB Atas Dasar Harga Berlaku (Tahun 2003) - Untuk Sektor Tersier, Sub Sektor Jasa Pemerintahan dihilangkan

Sumber : BPS Pusat yang diolah.

**Lampiran 15 : Faktor Tenaga Kerja dan Produktivitas/Labour and Productivity**  
**Lampiran 15.1 : Variabel Ketersediaan Tenaga Kerja/Availability of Manpower**  
**Lampiran 15.1.A : Variabel Ketersediaan Tenaga Kerja 53 Kota**  
*Availability of Manpower of 53 Cities*

| NO | PROPINSI  | KOTA             | Indikator Ketersediaan Tenaga Kerja Pencari Kerja |            |        | Indikator Ketersediaan TK Usia Produktif |            |        | Indikator Ketersediaan TK Berpendidikan Min SLTP |            |        |
|----|-----------|------------------|---------------------------------------------------|------------|--------|------------------------------------------|------------|--------|--------------------------------------------------|------------|--------|
|    |           |                  | % Pencari Kerja thd Angkatan Kerja                | Intensitas | Score  | % Usia Produktif                         | Intensitas | Score  | % TK Berpendidikan SLTP                          | Intensitas | Score  |
| 1  | Sumut     | Binjai           | 17.32                                             | TSCSB      | 0.0113 | 64.5                                     | TSPC       | 0.0019 | 36.6                                             | TSSSB      | 0.0032 |
| 2  | Sumut     | Medan            | 13.71                                             | TSCB       | 0.0068 | 67.7                                     | TSPB       | 0.0025 | 25.8                                             | TSSB       | 0.0027 |
| 3  | Sumut     | Pematang Siantar | 26.09                                             | TSCSB      | 0.0113 | 58.9                                     | TSPC       | 0.0019 | 31.7                                             | TSSSB      | 0.0032 |
| 4  | Sumut     | Sibolga          | 30.00                                             | TSCSB      | 0.0113 | 62.5                                     | TSPC       | 0.0019 | 30.3                                             | TSSSB      | 0.0032 |
| 5  | Sumut     | Tanjung Balai    | 5.51                                              | TSCK       | 0.0015 | 53.9                                     | TSPK       | 0.0015 | 20.7                                             | TSSC       | 0.0025 |
| 6  | Sumut     | Tebing Tinggi    | 10.81                                             | TSCC       | 0.0031 | 59.9                                     | TSPC       | 0.0019 | 33.3                                             | TSSSB      | 0.0032 |
| 7  | Sumbar    | Padang           | 16.99                                             | TSCSB      | 0.0113 | 67.2                                     | TSPB       | 0.0025 | 17.8                                             | TSSC       | 0.0025 |
| 8  | Sumbar    | Sawahlunto       | 12.00                                             | TSCC       | 0.0031 | 59.3                                     | TSPC       | 0.0019 | 17.0                                             | TSSK       | 0.0009 |
| 9  | Riau      | Pekanbaru        | 14.14                                             | TSCB       | 0.0068 | 64.9                                     | TSPC       | 0.0019 | 26.9                                             | TSSB       | 0.0027 |
| 10 | Riau      | Dumai            | 21.64                                             | TSCSB      | 0.0113 | 60.7                                     | TSPC       | 0.0019 | 29.9                                             | TSSSB      | 0.0032 |
| 11 | Kep. Riau | Tanjung Pinang   | 11.25                                             | TSCC       | 0.0031 | 59.3                                     | TSPC       | 0.0019 | 24.4                                             | TSSC       | 0.0025 |
| 12 | Kep. Riau | Batam            | 8.22                                              | TSCC       | 0.0031 | 76.7                                     | TSPSB      | 0.0034 | 10.0                                             | TSSSK      | 0.0004 |
| 13 | Jambi     | Jambi            | 8.90                                              | TSCC       | 0.0031 | 67.9                                     | TSPB       | 0.0025 | 26.4                                             | TSSB       | 0.0027 |
| 14 | Sumsel    | Palembang        | 16.55                                             | TSCSB      | 0.0113 | 64.7                                     | TSPC       | 0.0019 | 23.4                                             | TSSC       | 0.0025 |
| 15 | Babel     | Pangkal Pinang   | 20.57                                             | TSCSB      | 0.0113 | 65.5                                     | TSPC       | 0.0019 | 35.9                                             | TSSSB      | 0.0032 |
| 16 | Bengkulu  | Bengkulu         | 16.79                                             | TSCSB      | 0.0113 | 65.0                                     | TSPC       | 0.0019 | 16.6                                             | TSSK       | 0.0009 |
| 17 | Lampung   | Bandar Lampung   | 18.45                                             | TSCSB      | 0.0113 | 68.1                                     | TSPB       | 0.0025 | 23.0                                             | TSSC       | 0.0025 |
| 18 | Banten    | Cilegon          | 10.73                                             | TSCC       | 0.0031 | 64.6                                     | TSPC       | 0.0019 | 19.5                                             | TSSC       | 0.0025 |
| 19 | Banten    | Tangerang        | 13.84                                             | TSCB       | 0.0068 | 67.6                                     | TSPB       | 0.0025 | 22.9                                             | TSSC       | 0.0025 |
| 20 | DKI       | Jakarta          | 14.86                                             | TSCB       | 0.0068 | 70.6                                     | TSPB       | 0.0025 | 24.1                                             | TSSC       | 0.0025 |
| 21 | Jabar     | Bekasi           | 10.92                                             | TSCC       | 0.0031 | 68.6                                     | TSPB       | 0.0025 | 17.5                                             | TSSK       | 0.0009 |
| 22 | Jabar     | Bogor            | 19.54                                             | TSCSB      | 0.0113 | 65.1                                     | TSPC       | 0.0019 | 25.3                                             | TSSB       | 0.0027 |
| 23 | Jabar     | Bandung          | 14.38                                             | TSCB       | 0.0068 | 66.5                                     | TSPC       | 0.0019 | 22.9                                             | TSSC       | 0.0025 |
| 24 | Jabar     | Sukabumi         | 23.00                                             | TSCSB      | 0.0113 | 64.6                                     | TSPC       | 0.0019 | 28.6                                             | TSSSB      | 0.0032 |
| 25 | Jabar     | Cirebon          | 12.09                                             | TSCC       | 0.0031 | 60.2                                     | TSPC       | 0.0019 | 22.7                                             | TSSC       | 0.0025 |
| 26 | Jateng    | Semarang         | 11.44                                             | TSCC       | 0.0031 | 65.7                                     | TSPC       | 0.0019 | 23.7                                             | TSSC       | 0.0025 |
| 27 | Jateng    | Tegal            | 13.73                                             | TSCB       | 0.0068 | 60.0                                     | TSPC       | 0.0019 | 28.0                                             | TSSB       | 0.0027 |
| 28 | Jateng    | Pekalongan       | 2.27                                              | TSCSK      | 0.0008 | 63.4                                     | TSPC       | 0.0019 | 29.3                                             | TSSSB      | 0.0032 |
| 29 | Jateng    | Surakarta        | 11.87                                             | TSCC       | 0.0031 | 66.9                                     | TSPB       | 0.0025 | 27.7                                             | TSSB       | 0.0027 |
| 30 | DIY       | Yogyakarta       | 9.60                                              | TSCC       | 0.0031 | 70.2                                     | TSPB       | 0.0025 | 16.7                                             | TSSK       | 0.0009 |
| 31 | Jatim     | Kediri           | 19.08                                             | TSCSB      | 0.0113 | 63.9                                     | TSPC       | 0.0019 | 22.5                                             | TSSC       | 0.0025 |
| 32 | Jatim     | Malang           | 18.98                                             | TSCSB      | 0.0113 | 72.5                                     | TSPSB      | 0.0034 | 12.2                                             | TSSSK      | 0.0004 |
| 33 | Jatim     | Madiun           | 19.79                                             | TSCSB      | 0.0113 | 65.6                                     | TSPC       | 0.0019 | 22.3                                             | TSSC       | 0.0025 |
| 34 | Jatim     | Mojokerto        | 11.54                                             | TSCC       | 0.0031 | 66.1                                     | TSPC       | 0.0019 | 25.0                                             | TSSB       | 0.0027 |
| 35 | Jatim     | Surabaya         | 9.93                                              | TSCC       | 0.0031 | 68.9                                     | TSPB       | 0.0025 | 21.5                                             | TSSC       | 0.0025 |
| 36 | Jatim     | Probolinggo      | 19.35                                             | TSCSB      | 0.0113 | 65.9                                     | TSPC       | 0.0019 | 21.3                                             | TSSC       | 0.0025 |
| 37 | Bali      | Denpasar         | 8.95                                              | TSCC       | 0.0031 | 71.0                                     | TSPB       | 0.0025 | 17.9                                             | TSSC       | 0.0025 |
| 38 | Kalbar    | Pontianak        | 12.55                                             | TSCC       | 0.0031 | 64.5                                     | TSPC       | 0.0019 | 16.9                                             | TSSK       | 0.0009 |
| 39 | Kalteng   | Palangkaraya     | 10.64                                             | TSCC       | 0.0031 | 69.9                                     | TSPB       | 0.0025 | 24.4                                             | TSSC       | 0.0025 |
| 40 | Kalsel    | Banjarmasin      | 13.74                                             | TSCB       | 0.0068 | 67.3                                     | TSPB       | 0.0025 | 19.9                                             | TSSC       | 0.0025 |
| 41 | Kaltim    | Balikpapan       | 8.92                                              | TSCC       | 0.0031 | 66.0                                     | TSPC       | 0.0019 | 24.6                                             | TSSB       | 0.0027 |
| 42 | Kaltim    | Samarinda        | 5.61                                              | TSCK       | 0.0015 | 69.5                                     | TSPB       | 0.0025 | 25.3                                             | TSSB       | 0.0027 |
| 43 | Sulut     | Bitung           | 8.49                                              | TSCC       | 0.0031 | 62.3                                     | TSPC       | 0.0019 | 31.6                                             | TSSSB      | 0.0032 |
| 44 | Sulut     | Manado           | 2.65                                              | TSCSK      | 0.0008 | 70.9                                     | TSPB       | 0.0025 | 22.9                                             | TSSC       | 0.0025 |
| 45 | Gorontalo | Gorontalo        | 13.90                                             | TSCB       | 0.0068 | 65.0                                     | TSPC       | 0.0019 | 15.9                                             | TSSK       | 0.0009 |
| 46 | Sulteng   | Palu             | 8.51                                              | TSCC       | 0.0031 | 64.2                                     | TSPC       | 0.0019 | 21.5                                             | TSSC       | 0.0025 |
| 47 | Sultra    | Kendari          | 15.55                                             | TSCSB      | 0.0113 | 63.8                                     | TSPC       | 0.0019 | 19.0                                             | TSSC       | 0.0025 |
| 48 | Sulsel    | Makasar          | 21.99                                             | TSCSB      | 0.0113 | 63.6                                     | TSPC       | 0.0019 | 18.6                                             | TSSC       | 0.0025 |
| 49 | Sulsel    | Pare Pare        | 19.57                                             | TSCSB      | 0.0113 | 58.1                                     | TSPC       | 0.0019 | 14.4                                             | TSSK       | 0.0009 |
| 50 | NTB       | Mataram          | 11.24                                             | TSCC       | 0.0031 | 61.9                                     | TSPC       | 0.0019 | 15.4                                             | TSSK       | 0.0009 |
| 51 | NTT       | Kupang           | 16.57                                             | TSCSB      | 0.0113 | 69.4                                     | TSPB       | 0.0025 | 22.1                                             | TSSC       | 0.0025 |
| 52 | Irjabar   | Sorong           | 14.29                                             | TSCB       | 0.0068 | 57.2                                     | TSPK       | 0.0015 | 32.2                                             | TSSSB      | 0.0032 |
| 53 | Papua     | Jayapura         | 25.00                                             | TSCSB      | 0.0113 | 62.0                                     | TSPC       | 0.0019 | 27.6                                             | TSSB       | 0.0027 |

**Keterangan :**

**TSC** : Tenaga Kerja - Ketersediaan - Pencari Kerja  
**TSP** : Tenaga Kerja - Ketersediaan - Usia Produktif  
**TSS** : Tenaga Kerja - Ketersediaan - Berpendidikan SLTP  
Dibelakang **TSC/TSP/TSS - ST** : Sangat Tinggi  
**T** : Tinggi  
**SD** : Sedang  
**R** : Rendah  
**SR** : Sangat Rendah

|           |        |      |           |       |       |           |       |      |
|-----------|--------|------|-----------|-------|-------|-----------|-------|------|
| Rata-rata | 9.90   |      | Rata-rata | 62.31 |       | Rata-rata | 17.40 |      |
| Standev   | 5.61   |      | Standev   | 4.39  |       | Standev   | 11.60 |      |
| Skew      | 0.51   |      | Skew      | 0.02  |       | Skew      | 1.11  |      |
| Kuortis   | (0.47) |      | Kuortis   | 0.72  |       | Kuortis   | 0.55  |      |
| TSCSB     | 15.5   | -    | TSPSB     | 71.09 | -     | TSSSB     | 29.0  | -    |
| TSCB      | 12.7   | 15.5 | TSPB      | 66.70 | 71.09 | TSSB      | 23.2  | 29.0 |
| TSCC      | 7.1    | 12.7 | TSCB      | 57.92 | 66.70 | TSSC      | 11.6  | 23.2 |
| TSCK      | 4.3    | 7.1  | TSBK      | 53.53 | 57.92 | TSSK      | 5.8   | 11.6 |
| TSCSK     | -      | 4.3  | TSBSK     | -     | 53.53 | TSSSK     | -     | 5.8  |

Sumber : Data Sakernas Th.2003, dari BPS Pusat, yang telah diolah

**Lampiran 15.1.B : Variabel Ketersediaan Tenaga Kerja 161 Kabupaten**  
*Availability of Manpower of 161 Regencies*

| NO | PROPINSI | KABUPATEN            | Indikator Ketersediaan Tenaga Kerja Pencari Kerja |            |        | Indikator Ketersediaan TK Usia Produktif |            |        | Indikator Ketersediaan TK Berpendidikan Min SLTP |            |        |
|----|----------|----------------------|---------------------------------------------------|------------|--------|------------------------------------------|------------|--------|--------------------------------------------------|------------|--------|
|    |          |                      | % Pencari Kerja thd Angkatan Kerja                | Intensitas | Score  | % Usia Produktif                         | Intensitas | Score  | % TK Berpendidikan SLTP                          | Intensitas | Score  |
| 1  | Sumut    | Asahan               | 8.03                                              | TSCC       | 0.0031 | 61.8                                     | TSPC       | 0.0019 | 26.04                                            | TSSB       | 0.0027 |
| 2  | Sumut    | Dairi                | 8.84                                              | TSCC       | 0.0031 | 57.2                                     | TSPK       | 0.0015 | 41.67                                            | TSSSB      | 0.0032 |
| 3  | Sumut    | Deliserdang          | 11.25                                             | TSCC       | 0.0031 | 62.3                                     | TSPC       | 0.0019 | 29.27                                            | TSSSB      | 0.0032 |
| 4  | Sumut    | Langkat              | 12.52                                             | TSCC       | 0.0031 | 61.9                                     | TSPC       | 0.0019 | 38.75                                            | TSSSB      | 0.0032 |
| 5  | Sumut    | Simalungun           | 18.38                                             | TSCSB      | 0.0113 | 56.7                                     | TSPK       | 0.0015 | 25.06                                            | TSSB       | 0.0027 |
| 6  | Sumut    | Karo                 |                                                   | TSCSK      | 0.0008 | 61.7                                     | TSPC       | 0.0019 | 31.40                                            | TSSSB      | 0.0032 |
| 7  | Sumut    | Labuhan Batu         | 13.98                                             | TSCB       | 0.0068 | 58.4                                     | TSPC       | 0.0019 | 33.58                                            | TSSSB      | 0.0032 |
| 8  | Sumut    | Tapanuli Utara       | 13.10                                             | TSCB       | 0.0068 | 61.3                                     | TSPC       | 0.0019 | 36.92                                            | TSSSB      | 0.0032 |
| 9  | Sumbar   | Pesisir Selatan      | 13.20                                             | TSCB       | 0.0068 | 57.4                                     | TSPK       | 0.0015 | 19.74                                            | TSSC       | 0.0025 |
| 10 | Sumbar   | Sawalunto/Sijunjung  | 11.20                                             | TSCC       | 0.0031 | 62.2                                     | TSPC       | 0.0019 | 25.53                                            | TSSB       | 0.0027 |
| 11 | Sumbar   | Pasaman              | 7.49                                              | TSCC       | 0.0031 | 56.3                                     | TSPK       | 0.0015 | 33.12                                            | TSSSB      | 0.0032 |
| 12 | Sumbar   | Solok                | 9.23                                              | TSCC       | 0.0031 | 56.1                                     | TSPK       | 0.0015 | 29.09                                            | TSSSB      | 0.0032 |
| 13 | Riau     | Bengkalis            | 9.18                                              | TSCC       | 0.0031 | 64.7                                     | TSPC       | 0.0019 | 18.83                                            | TSSC       | 0.0025 |
| 14 | Riau     | Indragiri Hilir      | 12.61                                             | TSCC       | 0.0031 | 64.9                                     | TSPC       | 0.0019 | 22.53                                            | TSSC       | 0.0025 |
| 15 | Riau     | Kampar               | 21.13                                             | TSCSB      | 0.0113 | 49.4                                     | TSPSK      | 0.0006 | 29.33                                            | TSSSB      | 0.0032 |
| 16 | Riau     | Kuantan Sengigi      | 6.12                                              | TSCK       | 0.0015 | 72.3                                     | TSPSB      | 0.0034 | 39.75                                            | TSSSB      | 0.0032 |
| 17 | Riau     | Pelalawan            |                                                   | TSCSK      | 0.0008 | 61.3                                     | TSPC       | 0.0019 | 14.89                                            | TSSK       | 0.0009 |
| 18 | Riau     | Rokan Hulu           | 1.79                                              | TSCSK      | 0.0008 | 61.2                                     | TSPC       | 0.0019 | 18.00                                            | TSSC       | 0.0025 |
| 19 | Jambi    | Batanghari           | 5.07                                              | TSCK       | 0.0015 | 62.4                                     | TSPC       | 0.0019 | 32.43                                            | TSSSB      | 0.0032 |
| 20 | Jambi    | Bungo                | 4.24                                              | TSCSK      | 0.0008 | 62.4                                     | TSPC       | 0.0019 | 21.46                                            | TSSC       | 0.0025 |
| 21 | Jambi    | Kerinci              | 10.49                                             | TSCC       | 0.0031 | 60.7                                     | TSPC       | 0.0019 | 20.98                                            | TSSC       | 0.0025 |
| 22 | Jambi    | Tanjung Jabung Timur | 7.82                                              | TSCC       | 0.0031 | 62.1                                     | TSPC       | 0.0019 | 30.36                                            | TSSSB      | 0.0032 |
| 23 | Jambi    | Tebo                 | 4.62                                              | TSCK       | 0.0015 | 61.0                                     | TSPC       | 0.0019 | 21.66                                            | TSSC       | 0.0025 |
| 24 | Sumsel   | Muara Enim           | 6.04                                              | TSCK       | 0.0015 | 61.1                                     | TSPC       | 0.0019 | 23.09                                            | TSSC       | 0.0025 |
| 25 | Sumsel   | Musi Banyuasin       | 1.45                                              | TSCSK      | 0.0008 | 66.4                                     | TSPC       | 0.0019 | 30.30                                            | TSSSB      | 0.0032 |
| 26 | Sumsel   | Musi Rawas           | 4.55                                              | TSCK       | 0.0015 | 60.4                                     | TSPC       | 0.0019 | 21.71                                            | TSSC       | 0.0025 |
| 27 | Sumsel   | Ogan Komiring Ilir   | 10.91                                             | TSCC       | 0.0031 | 60.1                                     | TSPC       | 0.0019 | 14.64                                            | TSSK       | 0.0009 |
| 28 | Sumsel   | Lahat                | 18.11                                             | TSCSB      | 0.0113 | 62.3                                     | TSPC       | 0.0019 | 23.76                                            | TSSC       | 0.0025 |
| 29 | Babel    | Bangka               | 4.93                                              | TSCK       | 0.0015 | 60.5                                     | TSPC       | 0.0019 | 20.63                                            | TSSC       | 0.0025 |
| 30 | Babel    | Belitung             | 7.13                                              | TSCC       | 0.0031 | 64.4                                     | TSPC       | 0.0019 | 20.90                                            | TSSC       | 0.0025 |
| 31 | Bengkulu | Bengkulu Selatan     | 9.36                                              | TSCC       | 0.0031 | 57.6                                     | TSPK       | 0.0015 | 20.19                                            | TSSC       | 0.0025 |
| 32 | Bengkulu | Rejang Lebong        | 5.04                                              | TSCK       | 0.0015 | 63.7                                     | TSPC       | 0.0019 | 19.51                                            | TSSC       | 0.0025 |
| 33 | Bengkulu | Bengkulu Utara       | 4.56                                              | TSCK       | 0.0015 | 59.6                                     | TSPC       | 0.0019 | 22.47                                            | TSSC       | 0.0025 |
| 34 | Lampung  | Lampung Barat        | 7.64                                              | TSCC       | 0.0031 | 61.7                                     | TSPC       | 0.0019 | 18.09                                            | TSSC       | 0.0025 |
| 35 | Lampung  | Lampung Selatan      | 9.25                                              | TSCC       | 0.0031 | 62.5                                     | TSPC       | 0.0019 | 27.47                                            | TSSB       | 0.0027 |
| 36 | Lampung  | Lampung Timur        | 6.12                                              | TSCK       | 0.0015 | 63.1                                     | TSPC       | 0.0019 | 26.65                                            | TSSB       | 0.0027 |
| 37 | Lampung  | Lampung Utara        | 6.99                                              | TSCK       | 0.0015 | 57.6                                     | TSPK       | 0.0015 | 19.66                                            | TSSC       | 0.0025 |
| 38 | Lampung  | Way Kanan            | 3.95                                              | TSCSK      | 0.0008 | 60.4                                     | TSPC       | 0.0019 | 29.31                                            | TSSSB      | 0.0032 |
| 39 | Banten   | Lebak                | 9.18                                              | TSCC       | 0.0031 | 59.2                                     | TSPC       | 0.0019 | 12.76                                            | TSSSK      | 0.0004 |
| 40 | Banten   | Serang               | 19.61                                             | TSCSB      | 0.0113 | 59.2                                     | TSPC       | 0.0019 | 19.32                                            | TSSC       | 0.0025 |
| 41 | Banten   | Tangerang            | 24.07                                             | TSCSB      | 0.0113 | 74.7                                     | TSPSB      | 0.0034 | 30.65                                            | TSSSB      | 0.0032 |
| 42 | Jabar    | Bekasi               | 10.37                                             | TSCC       | 0.0031 | 63.8                                     | TSPC       | 0.0019 | 19.06                                            | TSSC       | 0.0025 |
| 43 | Jabar    | Bogor                | 14.31                                             | TSCB       | 0.0068 | 61.5                                     | TSPC       | 0.0019 | 16.28                                            | TSSK       | 0.0009 |
| 44 | Jabar    | Ciamis               | 5.89                                              | TSCK       | 0.0015 | 65.0                                     | TSPC       | 0.0019 | 18.54                                            | TSSC       | 0.0025 |
| 45 | Jabar    | Tasikmalaya          | 9.83                                              | TSCC       | 0.0031 | 62.0                                     | TSPC       | 0.0019 | 9.72                                             | TSSSK      | 0.0004 |
| 46 | Jabar    | Garut                | 13.57                                             | TSCB       | 0.0068 | 59.9                                     | TSPC       | 0.0019 | 15.78                                            | TSSK       | 0.0009 |
| 47 | Jabar    | Sumedang             | 12.92                                             | TSCB       | 0.0068 | 63.4                                     | TSPC       | 0.0019 | 22.89                                            | TSSC       | 0.0025 |
| 48 | Jabar    | Bandung              | 15.85                                             | TSCSB      | 0.0113 | 61.9                                     | TSPC       | 0.0019 | 21.27                                            | TSSC       | 0.0025 |
| 49 | Jabar    | Cianjur              | 14.85                                             | TSCB       | 0.0068 | 59.8                                     | TSPC       | 0.0019 | 12.26                                            | TSSSK      | 0.0004 |
| 50 | Jabar    | Sukabumi             | 11.01                                             | TSCC       | 0.0031 | 60.2                                     | TSPC       | 0.0019 | 12.77                                            | TSSSK      | 0.0004 |
| 51 | Jabar    | Cirebon              | 11.41                                             | TSCC       | 0.0031 | 60.6                                     | TSPC       | 0.0019 | 15.16                                            | TSSK       | 0.0009 |
| 52 | Jabar    | Kuningan             | 5.62                                              | TSCK       | 0.0015 | 63.5                                     | TSPC       | 0.0019 | 10.18                                            | TSSSK      | 0.0004 |
| 53 | Jabar    | Indramayu            | 10.46                                             | TSCC       | 0.0031 | 62.8                                     | TSPC       | 0.0019 | 8.77                                             | TSSSK      | 0.0004 |
| 54 | Jabar    | Purwakarta           | 11.90                                             | TSCC       | 0.0031 | 57.4                                     | TSPK       | 0.0015 | 10.91                                            | TSSSK      | 0.0004 |
| 55 | Jabar    | Karawang             | 17.60                                             | TSCSB      | 0.0113 | 62.6                                     | TSPC       | 0.0019 | 19.26                                            | TSSC       | 0.0025 |
| 56 | Jabar    | Subang               | 6.78                                              | TSCK       | 0.0015 | 65.0                                     | TSPC       | 0.0019 | 20.36                                            | TSSC       | 0.0025 |
| 57 | Jateng   | Kendal               | 4.56                                              | TSCK       | 0.0015 | 63.5                                     | TSPC       | 0.0019 | 18.52                                            | TSSC       | 0.0025 |



| NO  | PROPINSI | KABUPATEN           | Indikator Ketersediaan Tenaga Kerja Pencari Kerja |            |        | Indikator Ketersediaan TK Usia Produktif |            |        | Indikator Ketersediaan TK Berpendidikan Min SLTP |            |        |
|-----|----------|---------------------|---------------------------------------------------|------------|--------|------------------------------------------|------------|--------|--------------------------------------------------|------------|--------|
|     |          |                     | % Pencari Kerja thd Angkatan Kerja                | Intensitas | Score  | % Usia Produktif                         | Intensitas | Score  | % TK Berpendidikan SLTP                          | Intensitas | Score  |
| 58  | Jateng   | Pekalongan          | 7.40                                              | TSCC       | 0.0031 | 60.1                                     | TSPC       | 0.0019 | 13.26                                            | TSSSK      | 0.0004 |
| 59  | Jateng   | Pemalang            | 9.33                                              | TSCC       | 0.0031 | 60.0                                     | TSPC       | 0.0019 | 11.88                                            | TSSSK      | 0.0004 |
| 60  | Jateng   | Tegal               | 9.16                                              | TSCC       | 0.0031 | 60.8                                     | TSPC       | 0.0019 | 15.70                                            | TSSK       | 0.0009 |
| 61  | Jateng   | Jepara              | 2.80                                              | TSCSK      | 0.0008 | 63.7                                     | TSPC       | 0.0019 | 29.52                                            | TSSSB      | 0.0032 |
| 62  | Jateng   | Kudus               | 5.81                                              | TSCC       | 0.0015 | 66.1                                     | TSPC       | 0.0019 | 29.03                                            | TSSSB      | 0.0032 |
| 63  | Jateng   | Banyumas            | 9.11                                              | TSCC       | 0.0031 | 61.7                                     | TSPC       | 0.0019 | 19.06                                            | TSSC       | 0.0025 |
| 64  | Jateng   | Cilacap             | 10.44                                             | TSCC       | 0.0031 | 61.0                                     | TSPC       | 0.0019 | 17.95                                            | TSSC       | 0.0025 |
| 65  | Jateng   | Wonosobo            | 2.27                                              | TSCSK      | 0.0008 | 61.1                                     | TSPC       | 0.0019 | 15.64                                            | TSSK       | 0.0009 |
| 66  | Jateng   | Kebumen             | 7.77                                              | TSCC       | 0.0031 | 57.2                                     | TSPK       | 0.0015 | 17.24                                            | TSSK       | 0.0009 |
| 67  | Jateng   | Boyolali            | 3.68                                              | TSCSK      | 0.0008 | 61.7                                     | TSPC       | 0.0019 | 26.12                                            | TSSB       | 0.0027 |
| 68  | Jateng   | Sukoharjo           | 7.33                                              | TSCC       | 0.0031 | 63.2                                     | TSPC       | 0.0019 | 19.95                                            | TSSC       | 0.0025 |
| 69  | Jateng   | Karanganyar         | 0.82                                              | TSCSK      | 0.0008 | 64.2                                     | TSPC       | 0.0019 | 15.92                                            | TSSK       | 0.0009 |
| 70  | Jateng   | Klaten              | 8.83                                              | TSCC       | 0.0031 | 63.1                                     | TSPC       | 0.0019 | 23.44                                            | TSSC       | 0.0025 |
| 71  | Jateng   | Magelang            | 4.52                                              | TSCC       | 0.0015 | 62.5                                     | TSPC       | 0.0019 | 19.58                                            | TSSC       | 0.0025 |
| 72  | DIY      | Bantul              | 5.92                                              | TSCC       | 0.0015 | 64.8                                     | TSPC       | 0.0019 | 20.27                                            | TSSC       | 0.0025 |
| 73  | DIY      | Gunung Kidul        | 2.26                                              | TSCSK      | 0.0008 | 60.0                                     | TSPC       | 0.0019 | 20.45                                            | TSSC       | 0.0025 |
| 74  | Jatim    | Blitar              | 6.32                                              | TSCC       | 0.0015 | 62.3                                     | TSPC       | 0.0019 | 16.66                                            | TSSK       | 0.0009 |
| 75  | Jatim    | Kediri              | 10.75                                             | TSCC       | 0.0031 | 63.6                                     | TSPC       | 0.0019 | 24.90                                            | TSSB       | 0.0027 |
| 76  | Jatim    | Magetan             | 7.43                                              | TSCC       | 0.0031 | 63.3                                     | TSPC       | 0.0019 | 20.04                                            | TSSC       | 0.0025 |
| 77  | Jatim    | Ponorogo            | 3.84                                              | TSCSK      | 0.0008 | 63.1                                     | TSPC       | 0.0019 | 21.20                                            | TSSC       | 0.0025 |
| 78  | Jatim    | Tulungagung         | 11.23                                             | TSCC       | 0.0031 | 64.5                                     | TSPC       | 0.0019 | 20.13                                            | TSSC       | 0.0025 |
| 79  | Jatim    | Mojokerto           | 8.75                                              | TSCC       | 0.0031 | 64.7                                     | TSPC       | 0.0019 | 25.45                                            | TSSB       | 0.0027 |
| 80  | Jatim    | Pamekasan           | 5.32                                              | TSCC       | 0.0015 | 66.3                                     | TSPC       | 0.0019 | 20.70                                            | TSSC       | 0.0025 |
| 81  | Jatim    | Bangkalan           | 10.44                                             | TSCC       | 0.0031 | 58.2                                     | TSPC       | 0.0019 | 3.07                                             | TSSSK      | 0.0004 |
| 82  | Jatim    | Pasuruhan           | 8.35                                              | TSCC       | 0.0031 | 67.1                                     | TSPB       | 0.0025 | 17.03                                            | TSSK       | 0.0009 |
| 83  | Jatim    | Sidoarjo            | 10.50                                             | TSCC       | 0.0031 | 66.1                                     | TSPC       | 0.0019 | 25.42                                            | TSSB       | 0.0027 |
| 84  | Jatim    | Gresik              | 15.88                                             | TSCSB      | 0.0113 | 64.9                                     | TSPC       | 0.0019 | 25.11                                            | TSSB       | 0.0027 |
| 85  | Jatim    | Jombang             | 11.21                                             | TSCC       | 0.0031 | 62.7                                     | TSPC       | 0.0019 | 21.82                                            | TSSC       | 0.0025 |
| 86  | Jatim    | Lamongan            | 9.25                                              | TSCC       | 0.0031 | 65.6                                     | TSPC       | 0.0019 | 22.17                                            | TSSC       | 0.0025 |
| 87  | Jatim    | Banyuwangi          | 7.87                                              | TSCC       | 0.0031 | 64.2                                     | TSPC       | 0.0019 | 21.20                                            | TSSC       | 0.0025 |
| 88  | Jatim    | Bondowoso           | 4.84                                              | TSCC       | 0.0015 | 63.8                                     | TSPC       | 0.0019 | 10.52                                            | TSSSK      | 0.0004 |
| 89  | Jatim    | Situbondo           | 4.56                                              | TSCC       | 0.0015 | 69.9                                     | TSPB       | 0.0025 | 15.37                                            | TSSK       | 0.0009 |
| 90  | Jatim    | Jember              | 7.04                                              | TSCC       | 0.0015 | 64.8                                     | TSPC       | 0.0019 | 15.06                                            | TSSK       | 0.0009 |
| 91  | Bali     | Badung              | 7.11                                              | TSCC       | 0.0031 | 68.0                                     | TSPB       | 0.0025 | 14.54                                            | TSSK       | 0.0009 |
| 92  | Bali     | Bangli              | 1.23                                              | TSCSK      | 0.0008 | 62.1                                     | TSPC       | 0.0019 | 15.54                                            | TSSK       | 0.0009 |
| 93  | Bali     | Buleleng            | 3.59                                              | TSCSK      | 0.0008 | 62.3                                     | TSPC       | 0.0019 | 23.43                                            | TSSC       | 0.0025 |
| 94  | Bali     | Gianyar             | 4.35                                              | TSCC       | 0.0015 | 64.7                                     | TSPC       | 0.0019 | 20.01                                            | TSSC       | 0.0025 |
| 95  | Bali     | Jembrana            | 9.24                                              | TSCC       | 0.0031 | 66.6                                     | TSPC       | 0.0019 | 15.75                                            | TSSK       | 0.0009 |
| 96  | Bali     | Tabanan             | 3.13                                              | TSCSK      | 0.0008 | 63.1                                     | TSPC       | 0.0019 | 15.59                                            | TSSK       | 0.0009 |
| 97  | Bali     | Klungkung           | 11.16                                             | TSCC       | 0.0031 | 60.4                                     | TSPC       | 0.0019 | 14.95                                            | TSSK       | 0.0009 |
| 98  | Bali     | Karang Asem         | 1.94                                              | TSCSK      | 0.0008 | 61.2                                     | TSPC       | 0.0019 | 14.68                                            | TSSK       | 0.0009 |
| 99  | Kalbar   | Kapuas Hulu         | 3.89                                              | TSCSK      | 0.0008 | 62.2                                     | TSPC       | 0.0019 | 20.89                                            | TSSC       | 0.0025 |
| 100 | Kalbar   | Ketapang            | 9.29                                              | TSCC       | 0.0031 | 58.8                                     | TSPC       | 0.0019 | 17.96                                            | TSSC       | 0.0025 |
| 101 | Kalbar   | Pontianak           | 6.18                                              | TSCC       | 0.0015 | 56.0                                     | TSPK       | 0.0015 | 22.19                                            | TSSC       | 0.0025 |
| 102 | Kalbar   | Sambas              | 4.97                                              | TSCC       | 0.0015 | 59.5                                     | TSPC       | 0.0019 | 18.65                                            | TSSC       | 0.0025 |
| 103 | Kalbar   | Sanggau             | 5.77                                              | TSCC       | 0.0015 | 63.1                                     | TSPC       | 0.0019 | 26.50                                            | TSSB       | 0.0027 |
| 104 | Kalteng  | Barito Selatan      | 0.67                                              | TSCSK      | 0.0008 | 61.5                                     | TSPC       | 0.0019 | 31.39                                            | TSSSB      | 0.0032 |
| 105 | Kalteng  | Barito Utara        | 3.35                                              | TSCSK      | 0.0008 | 60.0                                     | TSPC       | 0.0019 | 35.84                                            | TSSSB      | 0.0032 |
| 106 | Kalteng  | Kapuas              | 5.81                                              | TSCC       | 0.0015 | 62.3                                     | TSPC       | 0.0019 | 22.43                                            | TSSC       | 0.0025 |
| 107 | Kalsel   | Hulu Sungai Selatan | 15.62                                             | TSCSB      | 0.0113 | 65.5                                     | TSPC       | 0.0019 | 16.04                                            | TSSK       | 0.0009 |
| 108 | Kalsel   | Hulu Sungai Tengah  | 17.41                                             | TSCSB      | 0.0113 | 69.2                                     | TSPB       | 0.0025 | 24.70                                            | TSSB       | 0.0027 |
| 109 | Kalsel   | Hulu Sungai Utara   | 1.68                                              | TSCSK      | 0.0008 | 60.4                                     | TSPC       | 0.0019 | 14.58                                            | TSSK       | 0.0009 |
| 110 | Kalsel   | Tabalong            | 8.70                                              | TSCC       | 0.0031 | 62.8                                     | TSPC       | 0.0019 | 21.17                                            | TSSC       | 0.0025 |
| 111 | Kalsel   | Tanah Laut          | 3.71                                              | TSCSK      | 0.0008 | 64.8                                     | TSPC       | 0.0019 | 18.83                                            | TSSC       | 0.0025 |
| 112 | Kalsel   | Tapin               | 4.82                                              | TSCC       | 0.0015 | 64.2                                     | TSPC       | 0.0019 | 22.57                                            | TSSC       | 0.0025 |
| 113 | Kaltim   | Berau               | 0.77                                              | TSCSK      | 0.0008 | 63.8                                     | TSPC       | 0.0019 | 27.93                                            | TSSB       | 0.0027 |
| 114 | Kaltim   | Kutai Kertanegara   | 3.13                                              | TSCSK      | 0.0008 | 65.7                                     | TSPC       | 0.0019 | 27.79                                            | TSSB       | 0.0027 |

| NO  | PROPINSI  | KABUPATEN      | Indikator Ketersediaan Tenaga Kerja Pencari Kerja |            |        | Indikator Ketersediaan TK Usia Produktif |            |        | Indikator Ketersediaan TK Berpendidikan Min SLTP |            |        |
|-----|-----------|----------------|---------------------------------------------------|------------|--------|------------------------------------------|------------|--------|--------------------------------------------------|------------|--------|
|     |           |                | % Pencari Kerja thd Angkatan Kerja                | Intensitas | Score  | % Usia Produktif                         | Intensitas | Score  | % TK Berpendidikan SLTP                          | Intensitas | Score  |
| 115 | Kaltim    | Pasir          | 0.62                                              | TSCSK      | 0.0008 | 65.2                                     | TSPC       | 0.0019 | 22.73                                            | TSSC       | 0.0025 |
| 116 | Kaltim    | Kab.Bulongan   | 1.18                                              | TSCSK      | 0.0008 | 60.2                                     | TSPC       | 0.0019 | 22.13                                            | TSSC       | 0.0025 |
| 117 | Kaltim    | Kutai Timur    | 2.17                                              | TSCSK      | 0.0008 | 62.6                                     | TSPC       | 0.0019 | 18.89                                            | TSSC       | 0.0025 |
| 118 | Kaltim    | Nunukan        | 9.97                                              | TSCC       | 0.0031 | 71.1                                     | TSPSB      | 0.0034 | 20.70                                            | TSSC       | 0.0025 |
| 119 | Sulut     | Minahasa       | 8.84                                              | TSCC       | 0.0031 | 65.4                                     | TSPC       | 0.0019 | 38.97                                            | TSSSB      | 0.0032 |
| 120 | Sulut     | Sangihe Talaut | 3.90                                              | TSCSK      | 0.0008 | 62.7                                     | TSPC       | 0.0019 | 21.94                                            | TSSC       | 0.0025 |
| 121 | Gorontalo | Gorontalo      | 8.22                                              | TSCC       | 0.0031 | 59.8                                     | TSPC       | 0.0019 | 14.97                                            | TSSK       | 0.0009 |
| 122 | Sulteng   | Banggai        | 1.86                                              | TSCSK      | 0.0008 | 60.6                                     | TSPC       | 0.0019 | 19.97                                            | TSSC       | 0.0025 |
| 123 | Sulteng   | Toli Toli      | 4.67                                              | TSCC       | 0.0015 | 60.2                                     | TSPC       | 0.0019 | 23.48                                            | TSSC       | 0.0025 |
| 124 | Sulteng   | Donggala       | 2.77                                              | TSCSK      | 0.0008 | 61.0                                     | TSPC       | 0.0019 | 17.21                                            | TSSK       | 0.0009 |
| 125 | Sulteng   | Morowali       | 12.78                                             | TSCB       | 0.0068 | 56.5                                     | TSPK       | 0.0015 | 18.97                                            | TSSC       | 0.0025 |
| 126 | Sulteng   | Poso           | 2.41                                              | TSCSK      | 0.0008 | 61.3                                     | TSPC       | 0.0019 | 25.59                                            | TSSB       | 0.0027 |
| 127 | Sultra    | Buton          | 12.52                                             | TSCC       | 0.0031 | 53.1                                     | TSPSK      | 0.0006 | 18.17                                            | TSSC       | 0.0025 |
| 128 | Sultra    | Kolaka         | 7.04                                              | TSCC       | 0.0015 | 61.2                                     | TSPC       | 0.0019 | 34.36                                            | TSSSB      | 0.0032 |
| 129 | Sulsel    | Gowa           | 25.36                                             | TSCSB      | 0.0113 | 62.3                                     | TSPC       | 0.0019 | 19.85                                            | TSSC       | 0.0025 |
| 130 | Sulsel    | Takalar        | 17.09                                             | TSCSB      | 0.0113 | 54.7                                     | TSPK       | 0.0015 | 17.23                                            | TSSK       | 0.0009 |
| 131 | Sulsel    | Jeneponto      | 16.40                                             | TSCSB      | 0.0113 | 55.7                                     | TSPK       | 0.0015 | 16.65                                            | TSSK       | 0.0009 |
| 132 | Sulsel    | Bantaeng       | 10.47                                             | TSCC       | 0.0031 | 61.0                                     | TSPC       | 0.0019 | 7.41                                             | TSSSK      | 0.0004 |
| 133 | Sulsel    | Sinjai         | 4.41                                              | TSCC       | 0.0015 | 60.0                                     | TSPC       | 0.0019 | 20.29                                            | TSSC       | 0.0025 |
| 134 | Sulsel    | Selayar        | 27.27                                             | TSCSB      | 0.0113 | 60.6                                     | TSPC       | 0.0019 | 13.13                                            | TSSSK      | 0.0004 |
| 135 | Sulsel    | Bone           | 16.06                                             | TSCSB      | 0.0113 | 58.7                                     | TSPC       | 0.0019 | 17.69                                            | TSSC       | 0.0025 |
| 136 | Sulsel    | Maros          | 16.54                                             | TSCSB      | 0.0113 | 61.9                                     | TSPC       | 0.0019 | 14.94                                            | TSSK       | 0.0009 |
| 137 | Sulsel    | Pangkep        | 4.21                                              | TSCSK      | 0.0008 | 59.1                                     | TSPC       | 0.0019 | 16.15                                            | TSSK       | 0.0009 |
| 138 | Sulsel    | Barru          | 21.23                                             | TSCSB      | 0.0113 | 55.5                                     | TSPK       | 0.0015 | 10.90                                            | TSSSK      | 0.0004 |
| 139 | Sulsel    | Pinrang        | 26.29                                             | TSCSB      | 0.0113 | 59.0                                     | TSPC       | 0.0019 | 25.92                                            | TSSB       | 0.0027 |
| 140 | Sulsel    | Majene         | 15.87                                             | TSCSB      | 0.0113 | 54.2                                     | TSPK       | 0.0015 | 23.20                                            | TSSC       | 0.0025 |
| 141 | Sulsel    | Enrekang       | 15.15                                             | TSCB       | 0.0068 | 60.4                                     | TSPC       | 0.0019 | 15.33                                            | TSSK       | 0.0009 |
| 142 | Sulsel    | Tanah Toraja   | 19.96                                             | TSCSB      | 0.0113 | 51.6                                     | TSPSK      | 0.0006 | 16.10                                            | TSSK       | 0.0009 |
| 143 | Sulsel    | Luwu           | 20.53                                             | TSCSB      | 0.0113 | 52.7                                     | TSPSK      | 0.0006 | 25.83                                            | TSSB       | 0.0027 |
| 144 | Sulsel    | Luwu Utara     | 14.80                                             | TSCB       | 0.0068 | 61.6                                     | TSPC       | 0.0019 | 20.99                                            | TSSC       | 0.0025 |
| 145 | NTB       | Bima           | 9.60                                              | TSCC       | 0.0031 | 55.8                                     | TSPK       | 0.0015 | 15.04                                            | TSSK       | 0.0009 |
| 146 | NTB       | Lombok Barat   | 4.21                                              | TSCSK      | 0.0008 | 59.6                                     | TSPC       | 0.0019 | 12.21                                            | TSSSK      | 0.0004 |
| 147 | NTB       | Dompu          | 7.91                                              | TSCC       | 0.0031 | 57.3                                     | TSPK       | 0.0015 | 21.17                                            | TSSC       | 0.0025 |
| 148 | NTB       | Lombok Timur   | 6.97                                              | TSCC       | 0.0015 | 58.7                                     | TSPC       | 0.0019 | 13.76                                            | TSSSK      | 0.0004 |
| 149 | NTT       | Ende           | 6.73                                              | TSCC       | 0.0015 | 57.9                                     | TSPC       | 0.0019 | 13.96                                            | TSSSK      | 0.0004 |
| 150 | NTT       | Flores Timur   | 1.14                                              | TSCSK      | 0.0008 | 57.2                                     | TSPK       | 0.0015 | 7.52                                             | TSSSK      | 0.0004 |
| 151 | NTT       | Manggarai      | 2.73                                              | TSCSK      | 0.0008 | 54.1                                     | TSPK       | 0.0015 | 10.62                                            | TSSSK      | 0.0004 |
| 152 | NTT       | Ngada          |                                                   | TSCSK      | 0.0008 | 57.0                                     | TSPK       | 0.0015 | 20.96                                            | TSSC       | 0.0025 |
| 153 | NTT       | TTS            | 0.63                                              | TSCSK      | 0.0008 | 58.2                                     | TSPC       | 0.0019 | 9.88                                             | TSSSK      | 0.0004 |
| 154 | NTT       | TTU            | 1.18                                              | TSCSK      | 0.0008 | 57.8                                     | TSPK       | 0.0015 | 9.32                                             | TSSSK      | 0.0004 |
| 155 | NTT       | Belu           | 0.82                                              | TSCSK      | 0.0008 | 49.8                                     | TSPSK      | 0.0006 | 16.23                                            | TSSK       | 0.0009 |
| 156 | NTT       | Sumba Barat    | 2.71                                              | TSCSK      | 0.0008 | 48.0                                     | TSPSK      | 0.0006 | 14.63                                            | TSSK       | 0.0009 |
| 157 | Irjabar   | Fakfak         |                                                   |            |        |                                          |            |        |                                                  |            |        |
| 158 | Irjabar   | Manokwari      | 1.45                                              | TSCSK      | 0.0008 | 58.4                                     | TSPC       | 0.0019 | 11.40                                            | TSSSK      | 0.0004 |
| 159 | Irjabar   | Sorong         | 5.88                                              | TSCC       | 0.0015 | 59.3                                     | TSPC       | 0.0019 | 25.71                                            | TSSB       | 0.0027 |
| 160 | Papua     | Jayawijaya     | 0.73                                              | TSCSK      | 0.0008 | 64.6                                     | TSPC       | 0.0019 | 5.89                                             | TSSSK      | 0.0004 |
| 161 | Irjabar   | Mimika         | 18.92                                             | TSCSB      | 0.0113 | 74.6                                     | TSPSB      | 0.0034 | 43.10                                            | TSSSB      | 0.0032 |

**Keterangan :****TSC** : Tenaga Kerja - Ketersediaan - Pencari Kerja**TSP** : Tenaga Kerja - Ketersediaan - Usia Produktif**TSS** : Tenaga Kerja - Ketersediaan - Berpendidikan SLTPDibelakang **TSC/TSP/TSS** - **ST** : Sangat Tinggi**T** : Tinggi**SD** : Sedang**R** : Rendah**SR** : Sangat Rendah

|           |        |      |           |       |       |           |       |      |
|-----------|--------|------|-----------|-------|-------|-----------|-------|------|
| Rata-rata | 9.90   |      | Rata-rata | 62.31 |       | Rata-rata | 17.40 |      |
| Standev   | 5.61   |      | Standev   | 4.39  |       | Standev   | 11.60 |      |
| Skew      | 0.51   |      | Skew      | 0.02  |       | Skew      | 1.11  |      |
| Kuortis   | (0.47) |      | Kuortis   | 0.72  |       | Kuortis   | 0.55  |      |
| TSCSB     | 15.5   | -    | TSPSB     | 71.09 | -     | TSSSB     | 29.0  | -    |
| TSCB      | 12.7   | 15.5 | TSPB      | 66.70 | 71.09 | TSSB      | 23.2  | 29.0 |
| TSCC      | 7.1    | 12.7 | TSCB      | 57.92 | 66.70 | TSSC      | 11.6  | 23.2 |
| TSCC      | 4.3    | 7.1  | TSCB      | 53.53 | 57.92 | TSSK      | 5.8   | 11.6 |
| TSCSK     | -      | 4.3  | TSCB      | -     | 53.53 | TSSSK     | -     | 5.8  |

Sumber : Data Sakernas Th.2003, dari BPS Pusat, yang telah diolah

**Lampiran 15.2 : Variabel Biaya Tenaga Kerja/Labour Cost**  
**Lampiran 15.2.A : Variabel Biaya Tenaga Kerja 53 Kota**  
*Labour Cost of 53 Cities*

| NO | PROPINSI  | KOTA             | Indikator Biaya Tenaga Kerja Aturan Formal |            |        | Indikator Biaya Tenaga Kerja Aktual |            |        |
|----|-----------|------------------|--------------------------------------------|------------|--------|-------------------------------------|------------|--------|
|    |           |                  | UMP/UMK Tahun 2003                         | Intensitas | Score  | Rata-Rata Upah Aktual               | Intensitas | Score  |
| 1  | Sumut     | Binjai           | 549,549                                    | TBRST      | 0.0015 | 673,108                             | TBDSD      | 0.0020 |
| 2  | Sumut     | Medan            | 549,549                                    | TBRST      | 0.0015 | 922,278                             | TBDT       | 0.0020 |
| 3  | Sumut     | Pematang Siantar | 549,549                                    | TBRST      | 0.0015 | 807,869                             | TBDSD      | 0.0020 |
| 4  | Sumut     | Sibolga          | 549,549                                    | TBRST      | 0.0015 | 640,500                             | TBDSD      | 0.0020 |
| 5  | Sumut     | Tanjung Balai    | 549,549                                    | TBRST      | 0.0015 | 726,469                             | TBDSD      | 0.0020 |
| 6  | Sumut     | Tebing Tinggi    | 549,549                                    | TBRST      | 0.0015 | 563,667                             | TBDR       | 0.0021 |
| 7  | Sumbar    | Padang           | 435,000                                    | TBRSD      | 0.0029 | 978,795                             | TBDST      | 0.0014 |
| 8  | Sumbar    | Sawahlunto       | 435,000                                    | TBRSD      | 0.0029 | 943,750                             | TBDT       | 0.0020 |
| 9  | Riau      | Pekanbaru        | 437,500                                    | TBRSD      | 0.0029 | 978,037                             | TBDST      | 0.0014 |
| 10 | Riau      | Dumai            | 510,000                                    | TBRT       | 0.0022 | 728,290                             | TBDSD      | 0.0020 |
| 11 | Kep. Riau | Tanjung Pinang   | 510,000                                    | TBRT       | 0.0022 | 936,780                             | TBDT       | 0.0020 |
| 12 | Kep. Riau | Batam            | 621,667                                    | TBRST      | 0.0015 | 1,043,372                           | TBDST      | 0.0014 |
| 13 | Jambi     | Jambi            | 390,000                                    | TBRR       | 0.0060 | 759,079                             | TBDSD      | 0.0020 |
| 14 | Sumsel    | Palembang        | 472,494                                    | TBRSD      | 0.0029 | 913,168                             | TBDT       | 0.0020 |
| 15 | Babel     | Pangkal Pinang   | 437,165                                    | TBRSD      | 0.0029 | 759,329                             | TBDSD      | 0.0020 |
| 16 | Bengkulu  | Bengkulu         | 330,000                                    | TBRSR      | 0.0088 | 1,031,724                           | TBDST      | 0.0014 |
| 17 | Lampung   | Bandar Lampung   | 350,000                                    | TBRSR      | 0.0088 | 702,465                             | TBDSD      | 0.0020 |
| 18 | Banten    | Cilegon          | 628,675                                    | TBRST      | 0.0015 | 965,760                             | TBDST      | 0.0014 |
| 19 | Banten    | Tangerang        | 628,675                                    | TBRST      | 0.0015 | 898,876                             | TBDT       | 0.0020 |
| 20 | DKI       | Jakarta          | 631,554                                    | TBRST      | 0.0015 | 1,003,677                           | TBDST      | 0.0014 |
| 21 | Jabar     | Bekasi           | 631,000                                    | TBRST      | 0.0015 | 1,030,507                           | TBDST      | 0.0014 |
| 22 | Jabar     | Bogor            | 576,169                                    | TBRST      | 0.0015 | 1,073,979                           | TBDST      | 0.0014 |
| 23 | Jabar     | Bandung          | 538,000                                    | TBRST      | 0.0015 | 856,537                             | TBDT       | 0.0020 |
| 24 | Jabar     | Sukabumi         | 395,500                                    | TBRR       | 0.0060 | 592,051                             | TBDR       | 0.0021 |
| 25 | Jabar     | Cirebon          | 375,000                                    | TBRR       | 0.0060 | 628,475                             | TBDSD      | 0.0020 |
| 26 | Jateng    | Semarang         | 400,000                                    | TBRSD      | 0.0029 | 695,259                             | TBDSD      | 0.0020 |
| 27 | Jateng    | Tegal            | 364,000                                    | TBRR       | 0.0060 | 585,594                             | TBDR       | 0.0021 |
| 28 | Jateng    | Pekalongan       | 375,000                                    | TBRR       | 0.0060 | 524,730                             | TBDR       | 0.0021 |
| 29 | Jateng    | Surakarta        | 378,000                                    | TBRR       | 0.0060 | 701,514                             | TBDSD      | 0.0020 |
| 30 | DIY       | Yogyakarta       | 360,000                                    | TBRR       | 0.0060 | 668,540                             | TBDSD      | 0.0020 |
| 31 | Jatim     | Kediri           | 415,000                                    | TBRSD      | 0.0029 | 563,434                             | TBDR       | 0.0021 |
| 32 | Jatim     | Malang           | 497,100                                    | TBRT       | 0.0022 | 699,274                             | TBDSD      | 0.0020 |
| 33 | Jatim     | Madiun           | 305,000                                    | TBRSR      | 0.0088 | 637,352                             | TBDSD      | 0.0020 |
| 34 | Jatim     | Mojokerto        | 478,500                                    | TBRSD      | 0.0029 | 772,413                             | TBDSD      | 0.0020 |
| 35 | Jatim     | Surabaya         | 516,750                                    | TBRT       | 0.0022 | 842,419                             | TBDT       | 0.0020 |
| 36 | Jatim     | Probolinggo      | 445,000                                    | TBRSD      | 0.0029 | 863,351                             | TBDT       | 0.0020 |
| 37 | Bali      | Denpasar         | 427,500                                    | TBRSD      | 0.0029 | 783,507                             | TBDSD      | 0.0020 |
| 38 | Kalbar    | Pontianak        | 400,000                                    | TBRSD      | 0.0029 | 851,032                             | TBDT       | 0.0020 |
| 39 | Kalteng   | Palangkaraya     | 452,763                                    | TBRSD      | 0.0029 | 1,063,450                           | TBDST      | 0.0014 |
| 40 | Kalsel    | Banjarmasin      | 459,172                                    | TBRSD      | 0.0029 | 764,092                             | TBDSD      | 0.0020 |
| 41 | Kaltim    | Balikpapan       | 618,333                                    | TBRST      | 0.0015 | 1,308,651                           | TBDST      | 0.0014 |
| 42 | Kaltim    | Samarinda        | 618,333                                    | TBRST      | 0.0015 | 1,077,721                           | TBDST      | 0.0014 |
| 43 | Sulut     | Bitung           | 495,000                                    | TBRT       | 0.0022 | 1,176,618                           | TBDST      | 0.0014 |
| 44 | Sulut     | Manado           | 495,000                                    | TBRT       | 0.0022 | 1,099,434                           | TBDST      | 0.0014 |
| 45 | Gorontalo | Gorontalo        | 410,000                                    | TBRSD      | 0.0029 | 737,158                             | TBDSD      | 0.0020 |
| 46 | Sulteng   | Palu             | 410,000                                    | TBRSD      | 0.0029 | 1,085,550                           | TBDST      | 0.0014 |
| 47 | Sultra    | Kendari          | 405,000                                    | TBRSD      | 0.0029 | 982,625                             | TBDST      | 0.0014 |
| 48 | Sulsel    | Makasar          | 415,000                                    | TBRSD      | 0.0029 | 1,038,010                           | TBDST      | 0.0014 |
| 49 | Sulsel    | Pare Pare        | 415,000                                    | TBRSD      | 0.0029 | 716,250                             | TBDSD      | 0.0020 |
| 50 | NTB       | Mataram          | 375,000                                    | TBRR       | 0.0060 | 550,920                             | TBDR       | 0.0021 |
| 51 | NTT       | Kupang           | 375,000                                    | TBRR       | 0.0060 | 924,883                             | TBDT       | 0.0020 |
| 52 | Irjabar   | Sorong           | 530,000                                    | TBRST      | 0.0015 | 2,085,455                           | TBDST      | 0.0014 |
| 53 | Papua     | Jayapura         | 530,000                                    | TBRST      | 0.0015 | 1,436,128                           | TBDST      | 0.0014 |

**Keterangan :**

**TBR** : Tenaga Kerja - Biaya Tenaga Kerja - Biaya Formal

**TBD** : Tenaga Kerja - Biaya Tenaga Kerja - Biaya Aktual

Dibelakang **TBR/TBD - ST** : Sangat Tinggi

**T** : Tinggi

**SD** : Sedang

**R** : Rendah

**SR** : Sangat Rendah

|           |         |         |           |         |         |
|-----------|---------|---------|-----------|---------|---------|
| Rata-rata | 439,765 |         | Rata-rata | 718,194 |         |
| TBRST     | 522,551 | -       | TBDST     | 953,459 | -       |
| TBRT      | 481,158 | 522,551 | TBDT      | 835,827 | 953,459 |
| TBRSD     | 398,372 | 481,158 | TBDSD     | 600,561 | 835,827 |
| TBRR      | 356,978 | 398,372 | TBDR      | 482,928 | 600,561 |
| TBRSR     | -       | 356,978 | TBDSR     | -       | 482,928 |

Sumber : Asosiasi Pengusaha Indonesia telah diolah dan Sakernas BPS Pusat

**Lampiran 15.2. B : Variabel Biaya Tenaga Kerja 161 Kabupaten**  
*Labour Cost of 161 Regencies*

| NO | PROPINSI | KABUPATEN            | Indikator Biaya Tenaga Kerja Aturan Formal |            |        | Indikator Biaya Tenaga Kerja Aktual |            |        |
|----|----------|----------------------|--------------------------------------------|------------|--------|-------------------------------------|------------|--------|
|    |          |                      | UMP/UMK Tahun 2003                         | Intensitas | Score  | Rata-Rata Upah Aktual               | Intensitas | Score  |
| 1  | Sumut    | Asahan               | 549,549                                    | TBRST      | 0.0015 | 690,187                             | TBDS       | 0.0020 |
| 2  | Sumut    | Dairi                | 549,549                                    | TBRST      | 0.0015 | 792,053                             | TBDS       | 0.0020 |
| 3  | Sumut    | Deliserdang          | 549,549                                    | TBRST      | 0.0015 | 586,114                             | TBDR       | 0.0021 |
| 4  | Sumut    | Langkat              | 549,549                                    | TBRST      | 0.0015 | 651,321                             | TBDS       | 0.0020 |
| 5  | Sumut    | Simalungun           | 549,549                                    | TBRST      | 0.0015 | 488,755                             | TBDR       | 0.0021 |
| 6  | Sumut    | Karo                 | 549,549                                    | TBRST      | 0.0015 | 1,056,667                           | TBDS       | 0.0014 |
| 7  | Sumut    | Labuhan Batu         | 549,549                                    | TBRST      | 0.0015 | 759,158                             | TBDS       | 0.0020 |
| 8  | Sumut    | Tapaneli Utara       | 549,549                                    | TBRST      | 0.0015 | 1,006,760                           | TBDS       | 0.0014 |
| 9  | Sumbar   | Pesisir Selatan      | 435,000                                    | TBRSD      | 0.0029 | 572,688                             | TBDR       | 0.0021 |
| 10 | Sumbar   | Sawalunto/Sijunjung  | 435,000                                    | TBRSD      | 0.0029 | 843,047                             | TBDT       | 0.0020 |
| 11 | Sumbar   | Pasaman              | 435,000                                    | TBRSD      | 0.0029 | 716,763                             | TBDS       | 0.0020 |
| 12 | Sumbar   | Solok                | 435,000                                    | TBRSD      | 0.0029 | 707,060                             | TBDS       | 0.0020 |
| 13 | Riau     | Bengkalis            | 437,500                                    | TBRSD      | 0.0029 | 684,695                             | TBDS       | 0.0020 |
| 14 | Riau     | Indragiri Hilir      | 437,500                                    | TBRSD      | 0.0029 | 777,857                             | TBDS       | 0.0020 |
| 15 | Riau     | Kampar               | 437,500                                    | TBRSD      | 0.0029 | 802,200                             | TBDS       | 0.0020 |
| 16 | Riau     | Kuantan Sengigi      | 437,500                                    | TBRSD      | 0.0029 | 564,951                             | TBDR       | 0.0021 |
| 17 | Riau     | Pelalawan            | 437,500                                    | TBRSD      | 0.0029 | 1,482,500                           | TBDS       | 0.0014 |
| 18 | Riau     | Rokan Hulu           | 437,500                                    | TBRSD      | 0.0029 | 737,500                             | TBDS       | 0.0020 |
| 19 | Jambi    | Batanghari           | 390,000                                    | TBR        | 0.0060 | 677,632                             | TBDS       | 0.0020 |
| 20 | Jambi    | Bungo                | 390,000                                    | TBR        | 0.0060 | 743,684                             | TBDS       | 0.0020 |
| 21 | Jambi    | Kerinci              | 390,000                                    | TBR        | 0.0060 | 718,727                             | TBDS       | 0.0020 |
| 22 | Jambi    | Tanjung Jabung Timur | 390,000                                    | TBR        | 0.0060 | 716,874                             | TBDS       | 0.0020 |
| 23 | Jambi    | Tebo                 | 390,000                                    | TBR        | 0.0060 | 417,188                             | TBDS       | 0.0088 |
| 24 | Sumsel   | Muara Enim           | 472,494                                    | TBRSD      | 0.0029 | 778,485                             | TBDS       | 0.0020 |
| 25 | Sumsel   | Musi Banyuasin       | 472,494                                    | TBRSD      | 0.0029 | 469,656                             | TBDS       | 0.0088 |
| 26 | Sumsel   | Musi Rawas           | 472,494                                    | TBRSD      | 0.0029 | 512,667                             | TBDR       | 0.0021 |
| 27 | Sumsel   | Ogan Komering Ilir   | 472,494                                    | TBRSD      | 0.0029 | 586,264                             | TBDR       | 0.0021 |
| 28 | Sumsel   | Lahat                | 472,494                                    | TBRSD      | 0.0029 | 437,295                             | TBDS       | 0.0088 |
| 29 | Babel    | Bangka               | 393,254                                    | TBR        | 0.0060 | 800,512                             | TBDS       | 0.0020 |
| 30 | Babel    | Belitung             | 396,750                                    | TBR        | 0.0060 | 668,600                             | TBDS       | 0.0020 |
| 31 | Bengkulu | Bengkulu Selatan     | 330,000                                    | TBR        | 0.0088 | 917,385                             | TBDT       | 0.0020 |
| 32 | Bengkulu | Rejang Lebong        | 330,000                                    | TBR        | 0.0088 | 550,892                             | TBDR       | 0.0021 |
| 33 | Bengkulu | Bengkulu Utara       | 330,000                                    | TBR        | 0.0088 | 558,775                             | TBDR       | 0.0021 |
| 34 | Lampung  | Lampung Barat        | 350,000                                    | TBR        | 0.0088 | 585,600                             | TBDR       | 0.0021 |
| 35 | Lampung  | Lampung Selatan      | 350,000                                    | TBR        | 0.0088 | 545,188                             | TBDR       | 0.0021 |
| 36 | Lampung  | Lampung Timur        | 350,000                                    | TBR        | 0.0088 | 687,377                             | TBDS       | 0.0020 |
| 37 | Lampung  | Lampung Utara        | 350,000                                    | TBR        | 0.0088 | 473,245                             | TBDS       | 0.0088 |
| 38 | Lampung  | Way Kanan            | 350,000                                    | TBR        | 0.0088 | 444,667                             | TBDS       | 0.0088 |
| 39 | Banten   | Lebak                | 475,000                                    | TBRSD      | 0.0029 | 512,724                             | TBDR       | 0.0021 |
| 40 | Banten   | Serang               | 606,000                                    | TBRST      | 0.0015 | 795,834                             | TBDS       | 0.0020 |
| 41 | Banten   | Tangerang            | 635,000                                    | TBRST      | 0.0015 | 1,248,860                           | TBDS       | 0.0014 |
| 42 | Jabar    | Bekasi               | 631,000                                    | TBRST      | 0.0015 | 954,632                             | TBDS       | 0.0014 |
| 43 | Jabar    | Bogor                | 600,944                                    | TBRST      | 0.0015 | 716,290                             | TBDS       | 0.0020 |
| 44 | Jabar    | Ciamis               | 337,000                                    | TBR        | 0.0088 | 568,520                             | TBDR       | 0.0021 |
| 45 | Jabar    | Tasikmalaya          | 345,000                                    | TBR        | 0.0088 | 269,528                             | TBDS       | 0.0088 |
| 46 | Jabar    | Garut                | 330,000                                    | TBR        | 0.0088 | 343,327                             | TBDS       | 0.0088 |
| 47 | Jabar    | Sumedang             | 537,000                                    | TBRST      | 0.0015 | 887,618                             | TBDT       | 0.0020 |
| 48 | Jabar    | Bandung              | 537,500                                    | TBRST      | 0.0015 | 604,656                             | TBDS       | 0.0020 |
| 49 | Jabar    | Cianjur              | 346,625                                    | TBR        | 0.0088 | 408,632                             | TBDS       | 0.0088 |
| 50 | Jabar    | Sukabumi             | 352,365                                    | TBR        | 0.0088 | 464,021                             | TBDS       | 0.0088 |
| 51 | Jabar    | Cirebon              | 370,000                                    | TBR        | 0.0060 | 441,413                             | TBDS       | 0.0088 |
| 52 | Jabar    | Kuningan             | 325,000                                    | TBR        | 0.0088 | 696,033                             | TBDS       | 0.0020 |
| 53 | Jabar    | Indramayu            | 420,000                                    | TBRSD      | 0.0029 | 437,970                             | TBDS       | 0.0088 |
| 54 | Jabar    | Purwakarta           | 524,000                                    | TBRST      | 0.0015 | 651,468                             | TBDS       | 0.0020 |
| 55 | Jabar    | Karawang             | 585,000                                    | TBRST      | 0.0015 | 730,615                             | TBDS       | 0.0020 |
| 56 | Jabar    | Subang               | 405,000                                    | TBRSD      | 0.0029 | 424,692                             | TBDS       | 0.0088 |
| 57 | Jateng   | Kendal               | 377,500                                    | TBR        | 0.0060 | 423,076                             | TBDS       | 0.0088 |
| 58 | Jateng   | Pekalongan           | 375,000                                    | TBR        | 0.0060 | 450,553                             | TBDS       | 0.0088 |
| 59 | Jateng   | Pemalang             | 380,000                                    | TBR        | 0.0060 | 495,389                             | TBDR       | 0.0021 |

| NO  | PROPINSI | KABUPATEN           | Indikator Biaya Tenaga Kerja Aturan Formal |            |        | Indikator Biaya Tenaga Kerja Aktual |            |        |
|-----|----------|---------------------|--------------------------------------------|------------|--------|-------------------------------------|------------|--------|
|     |          |                     | UMP/UMK Tahun 2003                         | Intensitas | Score  | Rata-Rata Upah Aktual               | Intensitas | Score  |
| 60  | Jateng   | Tegal               | 365,000                                    | TBRR       | 0.0060 | 382,736                             | TBDSR      | 0.0088 |
| 61  | Jateng   | Jepara              | 376,000                                    | TBRR       | 0.0060 | 506,124                             | TBDR       | 0.0021 |
| 62  | Jateng   | Kudus               | 384,000                                    | TBRR       | 0.0060 | 446,103                             | TBDSR      | 0.0088 |
| 63  | Jateng   | Banyumas            | 372,600                                    | TBRR       | 0.0060 | 434,552                             | TBDSR      | 0.0088 |
| 64  | Jateng   | Cilacap             | 402,500                                    | TBRSD      | 0.0029 | 459,666                             | TBDSR      | 0.0088 |
| 65  | Jateng   | Wonosobo            | 360,000                                    | TBRR       | 0.0060 | 294,268                             | TBDSR      | 0.0088 |
| 66  | Jateng   | Kebumen             | 348,800                                    | TBRSR      | 0.0088 | 340,684                             | TBDSR      | 0.0088 |
| 67  | Jateng   | Boyolali            | 357,500                                    | TBRR       | 0.0060 | 560,673                             | TBDR       | 0.0021 |
| 68  | Jateng   | Sukoharjo           | 370,500                                    | TBRR       | 0.0060 | 710,698                             | TBDSR      | 0.0020 |
| 69  | Jateng   | Karanganyar         | 375,000                                    | TBRR       | 0.0060 | 666,747                             | TBDSR      | 0.0020 |
| 70  | Jateng   | Klaten              | 358,000                                    | TBRR       | 0.0060 | 543,437                             | TBDR       | 0.0021 |
| 71  | Jateng   | Magelang            | 362,000                                    | TBRR       | 0.0060 | 491,601                             | TBDR       | 0.0021 |
| 72  | DIY      | Bantul              | 360,000                                    | TBRR       | 0.0060 | 548,275                             | TBDR       | 0.0021 |
| 73  | DIY      | Gunung Kidul        | 360,000                                    | TBRR       | 0.0060 | 481,551                             | TBDSR      | 0.0088 |
| 74  | Jatim    | Blitar              | 295,000                                    | TBRSR      | 0.0088 | 382,300                             | TBDSR      | 0.0088 |
| 75  | Jatim    | Kediri              | 415,000                                    | TBRSD      | 0.0029 | 486,464                             | TBDR       | 0.0021 |
| 76  | Jatim    | Magetan             | 292,500                                    | TBRSR      | 0.0088 | 584,209                             | TBDR       | 0.0021 |
| 77  | Jatim    | Ponorogo            | 282,000                                    | TBRSR      | 0.0088 | 617,975                             | TBDSR      | 0.0020 |
| 78  | Jatim    | Tulungagung         | 332,500                                    | TBRSR      | 0.0088 | 434,722                             | TBDSR      | 0.0088 |
| 79  | Jatim    | Mojokerto           | 400,000                                    | TBRSD      | 0.0029 | 648,693                             | TBDSR      | 0.0020 |
| 80  | Jatim    | Pamekasan           | 390,000                                    | TBRR       | 0.0060 | 410,255                             | TBDSR      | 0.0088 |
| 81  | Jatim    | Bangkalan           | 430,000                                    | TBRSD      | 0.0029 | 658,722                             | TBDSR      | 0.0020 |
| 82  | Jatim    | Pasuruhan           | 516,500                                    | TBRT       | 0.0022 | 558,725                             | TBDR       | 0.0021 |
| 83  | Jatim    | Sidoarjo            | 516,500                                    | TBRT       | 0.0022 | 694,028                             | TBDSR      | 0.0020 |
| 84  | Jatim    | Gresik              | 398,000                                    | TBRR       | 0.0060 | 675,445                             | TBDSR      | 0.0020 |
| 85  | Jatim    | Lamongan            | 328,450                                    | TBRSR      | 0.0088 | 434,709                             | TBDSR      | 0.0088 |
| 86  | Jatim    | Jombang             | 516,500                                    | TBRT       | 0.0022 | 553,485                             | TBDR       | 0.0021 |
| 87  | Jatim    | Banyuwangi          | 319,400                                    | TBRSR      | 0.0088 | 365,442                             | TBDSR      | 0.0088 |
| 88  | Jatim    | Bondowoso           | 300,000                                    | TBRSR      | 0.0088 | 332,917                             | TBDSR      | 0.0088 |
| 89  | Jatim    | Situbondo           | 311,000                                    | TBRSR      | 0.0088 | 509,912                             | TBDR       | 0.0021 |
| 90  | Jatim    | Jember              | 384,000                                    | TBRR       | 0.0060 | 392,664                             | TBDSR      | 0.0088 |
| 91  | Bali     | Badung              | 430,000                                    | TBRSD      | 0.0029 | 756,227                             | TBDSR      | 0.0020 |
| 92  | Bali     | Bangli              | 410,000                                    | TBRSD      | 0.0029 | 852,336                             | TBDR       | 0.0021 |
| 93  | Bali     | Buleleng            | 410,000                                    | TBRSD      | 0.0029 | 581,220                             | TBDR       | 0.0021 |
| 94  | Bali     | Gianyar             | 423,000                                    | TBRSD      | 0.0029 | 603,702                             | TBDSR      | 0.0020 |
| 95  | Bali     | Jembrana            | 417,500                                    | TBRSD      | 0.0029 | 523,875                             | TBDR       | 0.0021 |
| 96  | Bali     | Tabanan             | 410,000                                    | TBRSD      | 0.0029 | 745,981                             | TBDSR      | 0.0020 |
| 97  | Bali     | Klungkung           | 410,000                                    | TBRSD      | 0.0029 | 740,786                             | TBDSR      | 0.0020 |
| 98  | Bali     | Karang Asem         | 410,000                                    | TBRSD      | 0.0029 | 677,985                             | TBDSR      | 0.0020 |
| 99  | Kalbar   | Kapuas Hulu         | 400,000                                    | TBRSD      | 0.0029 | 1,292,402                           | TBDSR      | 0.0014 |
| 100 | Kalbar   | Ketapang            | 400,000                                    | TBRSD      | 0.0029 | 798,938                             | TBDSR      | 0.0020 |
| 101 | Kalbar   | Pontianak           | 400,000                                    | TBRSD      | 0.0029 | 732,453                             | TBDSR      | 0.0020 |
| 102 | Kalbar   | Sambas              | 400,000                                    | TBRSD      | 0.0029 | 531,036                             | TBDR       | 0.0021 |
| 103 | Kalbar   | Sanggau             | 400,000                                    | TBRSD      | 0.0029 | 884,728                             | TBDR       | 0.0020 |
| 104 | Kalteng  | Barito Selatan      | 452,763                                    | TBRSD      | 0.0029 | 1,096,190                           | TBDSR      | 0.0014 |
| 105 | Kalteng  | Barito Utara        | 452,763                                    | TBRSD      | 0.0029 | 1,196,230                           | TBDSR      | 0.0014 |
| 106 | Kalteng  | Kapuas              | 452,763                                    | TBRSD      | 0.0029 | 728,698                             | TBDSR      | 0.0020 |
| 107 | Kalsel   | Hulu Sungai Selatan | 459,172                                    | TBRSD      | 0.0029 | 659,383                             | TBDSR      | 0.0020 |
| 108 | Kalsel   | Hulu Sungai Tengah  | 459,172                                    | TBRSD      | 0.0029 | 762,932                             | TBDSR      | 0.0020 |
| 109 | Kalsel   | Hulu Sungai Utara   | 459,172                                    | TBRSD      | 0.0029 | 723,483                             | TBDSR      | 0.0020 |
| 110 | Kalsel   | Tabalong            | 459,172                                    | TBRSD      | 0.0029 | 1,259,967                           | TBDSR      | 0.0014 |
| 111 | Kalsel   | Tanah Laut          | 459,172                                    | TBRSD      | 0.0029 | 637,246                             | TBDSR      | 0.0020 |
| 112 | Kalsel   | Tapin               | 459,172                                    | TBRSD      | 0.0029 | 903,558                             | TBDR       | 0.0020 |
| 113 | Kaltim   | Berau               | 618,333                                    | TBRST      | 0.0015 | 1,178,334                           | TBDSR      | 0.0014 |
| 114 | Kaltim   | Kutai Kertanegara   | 618,333                                    | TBRST      | 0.0015 | 768,293                             | TBDSR      | 0.0020 |
| 115 | Kaltim   | Pasir               | 618,333                                    | TBRST      | 0.0015 | 1,342,462                           | TBDSR      | 0.0014 |
| 116 | Kaltim   | Kab.Bulungan        | 618,333                                    | TBRST      | 0.0015 | 843,082                             | TBDR       | 0.0020 |
| 117 | Kaltim   | Kutai Timur         | 618,333                                    | TBRST      | 0.0015 | 1,651,761                           | TBDSR      | 0.0014 |
| 118 | Kaltim   | Nunukan             | 618,333                                    | TBRST      | 0.0015 | 647,939                             | TBDSR      | 0.0020 |

| NO  | PROPINSI  | KABUPATEN      | Indikator Biaya Tenaga Kerja Aturan Formal |            |        | Indikator Biaya Tenaga Kerja Aktual |            |        |
|-----|-----------|----------------|--------------------------------------------|------------|--------|-------------------------------------|------------|--------|
|     |           |                | UMP/UMK Tahun 2003                         | Intensitas | Score  | Rata-Rata Upah Aktual               | Intensitas | Score  |
| 119 | Sulut     | Minahasa       | 495,000                                    | TBRT       | 0.0022 | 782,293                             | TBDS       | 0.0020 |
| 120 | Sulut     | Sangihe Talaut | 495,000                                    | TBRT       | 0.0022 | 704,414                             | TBDS       | 0.0020 |
| 121 | Gorontalo | Gorontalo      | 410,000                                    | TBRSD      | 0.0029 | 631,608                             | TBDS       | 0.0020 |
| 122 | Sulteng   | Banggai        | 410,000                                    | TBRSD      | 0.0029 | 688,129                             | TBDS       | 0.0020 |
| 123 | Sulteng   | Toli Toli      | 410,000                                    | TBRSD      | 0.0029 | 596,463                             | TBDR       | 0.0021 |
| 124 | Sulteng   | Donggala       | 410,000                                    | TBRSD      | 0.0029 | 478,274                             | TBDSR      | 0.0088 |
| 125 | Sulteng   | Morowali       | 410,000                                    | TBRSD      | 0.0029 | 563,784                             | TBDR       | 0.0021 |
| 126 | Sulteng   | Poso           | 410,000                                    | TBRSD      | 0.0029 | 643,991                             | TBDS       | 0.0020 |
| 127 | Sultra    | Buton          | 405,000                                    | TBRSD      | 0.0029 | 807,904                             | TBDS       | 0.0020 |
| 128 | Sultra    | Kolaka         | 405,000                                    | TBRSD      | 0.0029 | 930,293                             | TBDT       | 0.0020 |
| 129 | Sulsel    | Gowa           | 415,000                                    | TBRSD      | 0.0029 | 885,103                             | TBDT       | 0.0020 |
| 130 | Sulsel    | Takalar        | 415,000                                    | TBRSD      | 0.0029 | 451,748                             | TBDSR      | 0.0088 |
| 131 | Sulsel    | Jeneponto      | 415,000                                    | TBRSD      | 0.0029 | 988,742                             | TBDST      | 0.0014 |
| 132 | Sulsel    | Bantaeng       | 415,000                                    | TBRSD      | 0.0029 | 649,050                             | TBDS       | 0.0020 |
| 133 | Sulsel    | Sinjai         | 415,000                                    | TBRSD      | 0.0029 | 779,369                             | TBDS       | 0.0020 |
| 134 | Sulsel    | Selayar        | 415,000                                    | TBRSD      | 0.0029 | 558,438                             | TBDR       | 0.0021 |
| 135 | Sulsel    | Bone           | 415,000                                    | TBRSD      | 0.0029 | 479,113                             | TBDSR      | 0.0088 |
| 136 | Sulsel    | Maros          | 415,000                                    | TBRSD      | 0.0029 | 516,813                             | TBDR       | 0.0021 |
| 137 | Sulsel    | Pangkep        | 415,000                                    | TBRSD      | 0.0029 | 483,953                             | TBDR       | 0.0021 |
| 138 | Sulsel    | Barru          | 415,000                                    | TBRSD      | 0.0029 | 906,166                             | TBDT       | 0.0020 |
| 139 | Sulsel    | Pinrang        | 415,000                                    | TBRSD      | 0.0029 | 967,605                             | TBDST      | 0.0014 |
| 140 | Sulsel    | Majene         | 415,000                                    | TBRSD      | 0.0029 | 724,498                             | TBDS       | 0.0020 |
| 141 | Sulsel    | Enrekang       | 415,000                                    | TBRSD      | 0.0029 | 546,154                             | TBDR       | 0.0021 |
| 142 | Sulsel    | Tanah Toraja   | 415,000                                    | TBRSD      | 0.0029 | 960,823                             | TBDST      | 0.0014 |
| 143 | Sulsel    | Luwu           | 415,000                                    | TBRSD      | 0.0029 | 880,319                             | TBDT       | 0.0020 |
| 144 | Sulsel    | Luwu Utara     | 415,000                                    | TBRSD      | 0.0029 | 729,446                             | TBDS       | 0.0020 |
| 145 | NTB       | Bima           | 375,000                                    | TBRR       | 0.0060 | 624,617                             | TBDS       | 0.0020 |
| 146 | NTB       | Lombok Barat   | 375,000                                    | TBRR       | 0.0060 | 462,405                             | TBDSR      | 0.0088 |
| 147 | NTB       | Dompu          | 375,000                                    | TBRR       | 0.0060 | 679,385                             | TBDS       | 0.0020 |
| 148 | NTB       | Lombok Timur   | 375,000                                    | TBRR       | 0.0060 | 409,514                             | TBDSR      | 0.0088 |
| 149 | NTT       | Ende           | 375,000                                    | TBRR       | 0.0060 | 436,537                             | TBDSR      | 0.0088 |
| 150 | NTT       | Flores Timur   | 375,000                                    | TBRR       | 0.0060 | 732,798                             | TBDS       | 0.0020 |
| 151 | NTT       | Manggarai      | 375,000                                    | TBRR       | 0.0060 | 667,656                             | TBDS       | 0.0020 |
| 152 | NTT       | Ngada          | 375,000                                    | TBRR       | 0.0060 | 654,094                             | TBDS       | 0.0020 |
| 153 | NTT       | TTS            | 375,000                                    | TBRR       | 0.0060 | 868,307                             | TBDT       | 0.0020 |
| 154 | NTT       | TTU            | 375,000                                    | TBRR       | 0.0060 | 967,469                             | TBDST      | 0.0014 |
| 155 | NTT       | Belu           | 375,000                                    | TBRR       | 0.0060 | 525,337                             | TBDR       | 0.0021 |
| 156 | NTT       | Sumba Barat    | 375,000                                    | TBRR       | 0.0060 | 839,316                             | TBDT       | 0.0020 |
| 157 | Irjabar   | Fakfak         | 530,000                                    | TBRST      | 0.0015 | 1,328,610                           | TBDST      | 0.0014 |
| 158 | Irjabar   | Manokwari      | 530,000                                    | TBRST      | 0.0015 | 2,515,385                           | TBDST      | 0.0014 |
| 159 | Irjabar   | Sorong         | 530,000                                    | TBRST      | 0.0015 | 1,322,976                           | TBDST      | 0.0014 |
| 160 | Papua     | Jayawijaya     | 530,000                                    | TBRST      | 0.0015 | 253,833                             | TBDSR      | 0.0088 |
| 161 | Irjabar   | Mimika         | 530,000                                    | TBRST      | 0.0015 | 2,085,455                           | TBDST      | 0.0014 |

**Keterangan :****TBR** : Tenaga Kerja - Biaya Tenaga Kerja - Biaya Formal**TBD** : Tenaga Kerja - Biaya Tenaga Kerja - Biaya AktualDibelakang **TBR/TBD** - **ST** : Sangat Tinggi**T** : Tinggi**SD** : Sedang**R** : Rendah**SR** : Sangat Rendah

|           |         |         |           |         |         |
|-----------|---------|---------|-----------|---------|---------|
| Rata-rata | 439,765 |         | Rata-rata | 718,194 |         |
| TBRST     | 522,551 | -       | TBDST     | 953,459 | -       |
| TBRT      | 481,158 | 522,551 | TBDT      | 835,827 | 953,459 |
| TBRSD     | 398,372 | 481,158 | TBDS      | 600,561 | 835,827 |
| TBRR      | 356,978 | 398,372 | TBDR      | 482,928 | 600,561 |
| TBRSR     | -       | 356,978 | TBDSR     | -       | 482,928 |

Sumber : Asosiasi Pengusaha Indonesia telah diolah dan Sakernas BPS Pusat

**Lampiran 15.3 : Variabel / Indikator Produktivitas Tenaga Kerja/Productivity of Labour****Lampiran 15.3.A : Variabel Indikator Produktivitas Tenaga Kerja 53 Kota***Productivity of Labour of 53 Cities*

| NO | PROPINSI  | KOTA             | Nilai Tambah Manufaktur (Rp) | Jumlah TK Manufaktur (Orang) | Produktivitas Tenaga Kerja | Intensitas | Score  |
|----|-----------|------------------|------------------------------|------------------------------|----------------------------|------------|--------|
| 1  | Sumut     | Binjai           | 371,746                      | 16,739                       | 22,208,364                 | TPPSD      | 0.0066 |
| 2  | Sumut     | Medan            | 4,225,604                    | 122,459                      | 34,506,277                 | TPPSD      | 0.0066 |
| 3  | Sumut     | Pematang Siantar | 819,534                      | 7,048                        | 116,279,008                | TPPST      | 0.0273 |
| 4  | Sumut     | Sibolga          | 65,880                       | 1,762                        | 37,389,092                 | TPPT       | 0.0140 |
| 5  | Sumut     | Tanjung Balai    | 300,362                      | 958                          | 313,530,626                | TPPST      | 0.0273 |
| 6  | Sumut     | Tebing Tinggi    | 224,432                      | 11,453                       | 19,595,948                 | TPPSD      | 0.0066 |
| 7  | Sumbar    | Padang           | 1,482,028                    | 12,936                       | 114,566,170                | TPPST      | 0.0273 |
| 8  | Sumbar    | Sawahlunto       | 61,831                       | 616                          | 100,375,519                | TPPST      | 0.0273 |
| 9  | Riau      | Pekanbaru        | 288,689                      | 15,584                       | 18,524,698                 | TPPSD      | 0.0066 |
| 10 | Riau      | Dumai            | 2,669,830                    | 6,497                        | 4,393,503                  | TPPR       | 0.0028 |
| 11 | Kep. Riau | Tanjung Pinang   | 171,224                      | 2,922                        | 58,598,268                 | TPPST      | 0.0273 |
| 12 | Kep. Riau | Batam            | 6,604,882                    | 131,490                      | 50,231,059                 | TPPST      | 0.0273 |
| 13 | Jambi     | Jambi            | 525,196                      | 17,610                       | 29,823,761                 | TPPSD      | 0.0066 |
| 14 | Sumsel    | Palembang        | 6,040,344                    | 32,760                       | 103,231,441                | TPPST      | 0.0273 |
| 15 | Babel     | Pangkal Pinang   | 97,516                       | 7,992                        | 12,201,650                 | TPPR       | 0.0028 |
| 16 | Bengkulu  | Bengkulu         | 73,070                       | 2,373                        | 30,792,246                 | TPPSD      | 0.0066 |
| 17 | Lampung   | Bandar Lampung   | 1,772,760                    | 31,458                       | 56,353,233                 | TPPST      | 0.0273 |
| 18 | Banten    | Cilegon          | 5,969,298                    | 337,912                      | 17,665,244                 | TPPSD      | 0.0066 |
| 19 | Banten    | Tangerang        | 13,940,587                   | 172,992                      | 80,585,155                 | TPPST      | 0.0273 |
| 20 | DKI       | Jakarta          | 60,154,115                   | 661,768                      | 90,899,099                 | TPPST      | 0.0273 |
| 21 | Jabar     | Bekasi           | 5,307,519                    | 166,617                      | 31,854,607                 | TPPSD      | 0.0066 |
| 22 | Jabar     | Bogor            | 963,910                      | 60,588                       | 15,909,255                 | TPPSD      | 0.0066 |
| 23 | Jabar     | Bandung          | 7,225,546                    | 234,090                      | 30,866,530                 | TPPSD      | 0.0066 |
| 24 | Jabar     | Sukabumi         | 63,372                       | 13,770                       | 4,602,168                  | TPPR       | 0.0028 |
| 25 | Jabar     | Cirebon          | 2,013,785                    | 5,508                        | 365,610,911                | TPPST      | 0.0273 |
| 26 | Jateng    | Semarang         | 5,552,262                    | 147,436                      | 37,658,797                 | TPPT       | 0.0140 |
| 27 | Jateng    | Tegal            | 260,189                      | 7,434                        | 34,999,884                 | TPPSD      | 0.0066 |
| 28 | Jateng    | Pekalongan       | 532,155                      | 27,612                       | 19,272,603                 | TPPSD      | 0.0066 |
| 29 | Jateng    | Surakarta        | 1,217,411                    | 48,852                       | 24,920,401                 | TPPSD      | 0.0066 |
| 30 | DIY       | Yogyakarta       | 551,025                      | 19,056                       | 28,916,089                 | TPPSD      | 0.0066 |
| 31 | Jatim     | Kediri           | 17,184,249                   | 30,508                       | 563,270,268                | TPPST      | 0.0273 |
| 32 | Jatim     | Malang           | 3,571,598                    | 34,716                       | 102,880,470                | TPPST      | 0.0273 |
| 33 | Jatim     | Madiun           | 285,910                      | 8,416                        | 33,972,241                 | TPPSD      | 0.0066 |
| 34 | Jatim     | Mojokerto        | 126,989                      | 16,832                       | 7,544,481                  | TPPR       | 0.0028 |
| 35 | Jatim     | Surabaya         | 20,170,713                   | 223,024                      | 90,441,893                 | TPPST      | 0.0273 |
| 36 | Jatim     | Probolinggo      | 328,926                      | 7,364                        | 44,666,710                 | TPPT       | 0.0140 |
| 37 | Bali      | Denpasar         | 550,340                      | 39,006                       | 14,109,117                 | TPPSD      | 0.0066 |
| 38 | Kalbar    | Pontianak        | 210,556                      | 27,317                       | 7,707,868                  | TPPR       | 0.0028 |
| 39 | Kalteng   | Palangkaraya     | 66,309                       | 1,845                        | 35,939,827                 | TPPSD      | 0.0066 |
| 40 | Kalsel    | Banjarmasin      | 274,972                      | 27,180                       | 42,538,775                 | TPPT       | 0.0140 |
| 41 | Kaltim    | Balikpapan       | 5,153,787                    | 13,226                       | 22,797,912                 | TPPSD      | 0.0066 |
| 42 | Kaltim    | Samarinda        | 2,420,966                    | 32,790                       | 73,832,450                 | TPPST      | 0.0273 |
| 43 | Sulut     | Bitung           | 332,157                      | 7,269                        | 45,695,006                 | TPPT       | 0.0140 |
| 44 | Sulut     | Manado           | 244,648                      | 7,212                        | 33,922,352                 | TPPSD      | 0.0066 |
| 45 | Gorontalo | Gorontalo        | 37,743                       | 2,349                        | 16,067,501                 | TPPSD      | 0.0066 |
| 46 | Sulteng   | Palu             | 286,661                      | 5,110                        | 56,098,043                 | TPPST      | 0.0273 |
| 47 | Sultra    | Kendari          | 110,681                      | 4,292                        | 25,787,796                 | TPPSD      | 0.0066 |
| 48 | Sulsel    | Makasar          | 2,388,712                    | 35,860                       | 66,612,154                 | TPPST      | 0.0273 |
| 49 | Sulsel    | Pare Pare        | 20,017                       | 3,260                        | 6,140,181                  | TPPR       | 0.0028 |
| 50 | NTB       | Mataram          | 163,837                      | 8,797                        | 18,624,183                 | TPPSD      | 0.0066 |
| 51 | NTT       | Kupang           | 64,938                       | 2,555                        | 25,416,144                 | TPPSD      | 0.0066 |
| 52 | Iriabar   | Sorong           | 176,236                      | 1,830                        | 96,303,689                 | TPPST      | 0.0273 |
| 53 | Papua     | Jayapura         | 96,137                       | 1,830                        | 52,534,011                 | TPPST      | 0.0273 |

**Keterangan :**

**TPP** : Tenaga Kerja - Produktivitas - Tenaga Kerja

Dibelakang **TPP - ST** : Sangat Tinggi

**T** : Tinggi

**SD** : Sedang

**R** : Rendah

**SR** : Sangat Rendah

Rasio antara Nilai Tambah Manufaktur terhadap Jumlah Tenaga Kerja Manufaktur

Sumber : Data PDRB Atas Dasar Harga Berlaku th 2003, dan Data Sakernas Th.2003, BPS, yang telah diolah

|           |            |            |
|-----------|------------|------------|
| Rata-rata | 24,891,997 |            |
| Standev   | 22,495,586 |            |
| Skew      | 1          |            |
| Kuortis   | 1          |            |
| TPPST     | 47,387,583 | -          |
| TPPT      | 36,139,790 | 47,387,583 |
| TPPSD     | 13,644,204 | 36,139,790 |
| TPPR      | 2,396,411  | 13,644,204 |
| TPPSR     | -          | 2,396,411  |

**Lampiran 15.3.B : Variabel Indikator Produktivitas Tenaga Kerja 161 Kabupaten**  
*Productivity of Labour of 161 Regencies*

| NO | PROPINSI | KABUPATEN            | Nilai Tambah<br>Manufaktur<br>(Rp) | Jumlah TK<br>Manufaktur<br>(Orang) | Produktivitas<br>Tenaga Kerja | Intensitas | Score  |
|----|----------|----------------------|------------------------------------|------------------------------------|-------------------------------|------------|--------|
| 1  | Sumut    | Asahan               | 4,563,941                          | 31,263                             | 145,985,389                   | TPPST      | 0.0273 |
| 2  | Sumut    | Dairi                | 6,342                              | 2,643                              | 2,399,467                     | TPPR       | 0.0028 |
| 3  | Sumut    | Deliserdang          | 3,511,648                          | 91,094                             | 38,549,712                    | TPPT       | 0.0140 |
| 4  | Sumut    | Langkat              | 905,070                            | 7,587                              | 89,146,093                    | TPPST      | 0.0273 |
| 5  | Sumut    | Simalungun           | 811,035                            | 4,713                              | 172,084,649                   | TPPST      | 0.0273 |
| 6  | Sumut    | Karo                 | 41,649                             | 1,762                              | 23,637,395                    | TPPSD      | 0.0066 |
| 7  | Sumut    | Labuhan Batu         | 3,840,727                          | 13,226                             | 290,392,157                   | TPPST      | 0.0273 |
| 8  | Sumut    | Tapanuli Utara       | 19,612                             | 16,286                             | 1,204,207                     | TPPSR      | 0.0019 |
| 9  | Sumbar   | Pesisir Selatan      | 238,429                            | 5,544                              | 43,006,600                    | TPPT       | 0.0140 |
| 10 | Sumbar   | Sawalunto/Sijunjung  | 50,516                             | 8,400                              | 6,013,774                     | TPPR       | 0.0028 |
| 11 | Sumbar   | Pasaman              | 69,559                             | 1,232                              | 56,460,008                    | TPPST      | 0.0273 |
| 12 | Sumbar   | Solok                | 123,705                            | 1,232                              | 100,409,505                   | TPPST      | 0.0273 |
| 13 | Riau     | Bengkalis            | 1,262,141                          | 20,251                             | 11,135,180                    | TPPR       | 0.0028 |
| 14 | Riau     | Indragiri Hilir      | 317,077                            | 7,364                              | 43,057,723                    | TPPT       | 0.0140 |
| 15 | Riau     | Kampar               | 105,946                            | 5,523                              | 19,182,763                    | TPPSD      | 0.0066 |
| 16 | Riau     | Kuantan Sengigi      | 72,600                             | 25,774                             | 2,816,811                     | TPPR       | 0.0028 |
| 17 | Riau     | Pelalawan            | 197,749                            | 1,841                              | 107,413,900                   | TPPST      | 0.0273 |
| 18 | Riau     | Rokan Hulu           | 71,509                             | 1,841                              | 38,842,504                    | TPPT       | 0.0140 |
| 19 | Jambi    | Batanghari           | 181,904                            | 1,196                              | 152,093,981                   | TPPST      | 0.0273 |
| 20 | Jambi    | Bungo                | 53,863                             | 2,968                              | 18,147,939                    | TPPSD      | 0.0066 |
| 21 | Jambi    | Kerinci              | 62,023                             | 3,566                              | 17,392,860                    | TPPSD      | 0.0066 |
| 22 | Jambi    | Tanjung Jabung Timur | 155,506                            | 15,471                             | 10,051,466                    | TPPR       | 0.0028 |
| 23 | Jambi    | Tebo                 | 26,830                             | 4,186                              | 6,409,561                     | TPPR       | 0.0028 |
| 24 | Sumsel   | Muara Enim           | 169,367                            | 5,152                              | 32,874,030                    | TPPSD      | 0.0066 |
| 25 | Sumsel   | Musi Banyuasin       | 948,525                            | 12,075                             | 78,552,795                    | TPPST      | 0.0273 |
| 26 | Sumsel   | Musi Rawas           | 269,675                            | 1,876                              | 143,750,000                   | TPPST      | 0.0273 |
| 27 | Sumsel   | Ogan Komiring Ilir   | 424,632                            | 23,793                             | 17,846,930                    | TPPSD      | 0.0066 |
| 28 | Sumsel   | Lahat                | 231,747                            | 1,757                              | 131,899,260                   | TPPST      | 0.0273 |
| 29 | Babel    | Bangka               | 236,167                            | 5,368                              | 43,995,343                    | TPPT       | 0.0140 |
| 30 | Babel    | Belitung             | 225,946                            | 4,440                              | 50,888,739                    | TPPST      | 0.0273 |
| 31 | Bengkulu | Bengkulu Selatan     | 7,518                              | 1,436                              | 5,235,376                     | TPPR       | 0.0028 |
| 32 | Bengkulu | Rejang Lebong        | 49,747                             | 4,108                              | 12,109,723                    | TPPR       | 0.0028 |
| 33 | Bengkulu | Bengkulu Utara       | 28,881                             | 2,872                              | 10,056,058                    | TPPR       | 0.0028 |
| 34 | Lampung  | Lampung Barat        | 32,838                             | 871                                | 37,701,493                    | TPPT       | 0.0140 |
| 35 | Lampung  | Lampung Selatan      | 524,235                            | 4,684                              | 111,920,367                   | TPPST      | 0.0273 |
| 36 | Lampung  | Lampung Timur        | 240,830                            | 3,309                              | 72,780,296                    | TPPST      | 0.0273 |
| 37 | Lampung  | Lampung Utara        | 82,983                             | 2,491                              | 33,313,127                    | TPPSD      | 0.0066 |
| 38 | Lampung  | Way Kanan            | 50,317                             | 4,355                              | 11,553,846                    | TPPR       | 0.0028 |
| 39 | Banten   | Lebak                | 359,594                            | 32,388                             | 11,102,694                    | TPPR       | 0.0028 |
| 40 | Banten   | Serang               | 4,428,399                          | 58,572                             | 75,606,078                    | TPPST      | 0.0273 |
| 41 | Banten   | Tangerang            | 10,007,593                         | 20,352                             | 491,725,299                   | TPPST      | 0.0273 |
| 42 | Jabar    | Bekasi               | 31,081,817                         | 122,249                            | 254,250,068                   | TPPST      | 0.0273 |
| 43 | Jabar    | Bogor                | 7,127,729                          | 267,253                            | 26,670,341                    | TPPSD      | 0.0066 |
| 44 | Jabar    | Ciamis               | 493,029                            | 21,728                             | 22,690,933                    | TPPSD      | 0.0066 |
| 45 | Jabar    | Tasikmalaya          | 332,644                            | 107,065                            | 3,106,937                     | TPPR       | 0.0028 |
| 46 | Jabar    | Garut                | 789,972                            | 58,778                             | 13,439,919                    | TPPR       | 0.0028 |
| 47 | Jabar    | Sumedang             | 648,212                            | 56,830                             | 11,406,154                    | TPPR       | 0.0028 |
| 48 | Jabar    | Bandung              | 12,808,041                         | 335,076                            | 38,224,286                    | TPPT       | 0.0140 |
| 49 | Jabar    | Cianjur              | 218,185                            | 39,302                             | 5,551,495                     | TPPR       | 0.0028 |
| 50 | Jabar    | Sukabumi             | 1,394,414                          | 82,712                             | 16,858,666                    | TPPSD      | 0.0066 |
| 51 | Jabar    | Cirebon              | 684,766                            | 113,485                            | 6,033,976                     | TPPR       | 0.0028 |
| 52 | Jabar    | Kuningan             | 110,297                            | 10,689                             | 10,318,784                    | TPPR       | 0.0028 |
| 53 | Jabar    | Indramayu            | 275,131                            | 37,575                             | 7,322,178                     | TPPR       | 0.0028 |
| 54 | Jabar    | Purwakarta           | 2,677,420                          | 38,579                             | 69,400,974                    | TPPST      | 0.0273 |
| 55 | Jabar    | Karawang             | 4,673,454                          | 161,726                            | 28,897,357                    | TPPSD      | 0.0066 |
| 56 | Jabar    | Subang               | 301,563                            | 14,995                             | 20,110,904                    | TPPSD      | 0.0066 |
| 57 | Jateng   | Kendal               | 2,195,645                          | 37,538                             | 58,491,249                    | TPPST      | 0.0273 |
| 58 | Jateng   | Pekalongan           | 1,093,879                          | 134,624                            | 8,125,436                     | TPPR       | 0.0028 |



| NO  | PROPINSI | KABUPATEN           | Nilai Tambah<br>Manufaktur<br>(Rp) | Jumlah TK<br>Manufaktur<br>(Orang) | Produktivitas<br>Tenaga Kerja | Intensitas | Score  |
|-----|----------|---------------------|------------------------------------|------------------------------------|-------------------------------|------------|--------|
| 59  | Jateng   | Pemalang            | 685,635                            | 27,028                             | 25,367,587                    | TPPSD      | 0.0066 |
| 60  | Jateng   | Tegal               | 778,346                            | 145,718                            | 5,341,457                     | TPPR       | 0.0028 |
| 61  | Jateng   | Jepara              | 1,047,699                          | 251,122                            | 4,172,071                     | TPPR       | 0.0028 |
| 62  | Jateng   | Kudus               | 7,596,721                          | 175,090                            | 43,387,523                    | TPPT       | 0.0140 |
| 63  | Jateng   | Banyumas            | 746,833                            | 158,618                            | 4,708,373                     | TPPR       | 0.0028 |
| 64  | Jateng   | Cilacap             | 15,909,569                         | 117,784                            | 15,078,479                    | TPPSD      | 0.0066 |
| 65  | Jateng   | Wonosobo            | 171,991                            | 30,032                             | 5,726,912                     | TPPR       | 0.0028 |
| 66  | Jateng   | Kebumen             | 276,638                            | 137,962                            | 2,005,173                     | TPPSR      | 0.0019 |
| 67  | Jateng   | Boyolali            | 432,575                            | 93,024                             | 4,650,142                     | TPPR       | 0.0028 |
| 68  | Jateng   | Sukoharjo           | 960,635                            | 79,028                             | 12,155,631                    | TPPR       | 0.0028 |
| 69  | Jateng   | Karanganyar         | 1,416,667                          | 128,472                            | 11,027,045                    | TPPR       | 0.0028 |
| 70  | Jateng   | Klaten              | 973,052                            | 172,928                            | 5,626,919                     | TPPR       | 0.0028 |
| 71  | Jateng   | Magelang            | 701,949                            | 61,676                             | 11,381,240                    | TPPR       | 0.0028 |
| 72  | DIY      | Bantul              | 578,682                            | 91,554                             | 6,320,663                     | TPPR       | 0.0028 |
| 73  | DIY      | Gunung Kidul        | 371,537                            | 21,614                             | 17,189,646                    | TPPSD      | 0.0066 |
| 74  | Jatim    | Blitar              | 106,520                            | 40,793                             | 2,611,228                     | TPPR       | 0.0028 |
| 75  | Jatim    | Kediri              | 548,909                            | 64,155                             | 8,555,987                     | TPPR       | 0.0028 |
| 76  | Jatim    | Magetan             | 176,352                            | 9,468                              | 18,626,074                    | TPPSD      | 0.0066 |
| 77  | Jatim    | Ponorogo            | 215,802                            | 22,056                             | 9,784,289                     | TPPR       | 0.0028 |
| 78  | Jatim    | Tulungagung         | 837,372                            | 80,352                             | 10,421,302                    | TPPR       | 0.0028 |
| 79  | Jatim    | Mojokerto           | 1,206,813                          | 104,404                            | 11,559,067                    | TPPR       | 0.0028 |
| 80  | Jatim    | Pamekasan           | 20,330                             | 4,716                              | 4,310,825                     | TPPR       | 0.0028 |
| 81  | Jatim    | Bangkalan           | 97,886                             | 11,953                             | 8,189,239                     | TPPR       | 0.0028 |
| 82  | Jatim    | Pasuruhan           | 1,701,145                          | 107,886                            | 15,767,989                    | TPPSD      | 0.0066 |
| 83  | Jatim    | Sidoarjo            | 8,160,841                          | 238,279                            | 34,249,100                    | TPPSD      | 0.0066 |
| 84  | Jatim    | Gresik              | 6,665,043                          | 94,191                             | 70,760,930                    | TPPST      | 0.0273 |
| 85  | Jatim    | Jombang             | 509,833                            | 87,680                             | 5,814,696                     | TPPR       | 0.0028 |
| 86  | Jatim    | Lamongan            | 218,816                            | 33,175                             | 6,595,824                     | TPPR       | 0.0028 |
| 87  | Jatim    | Banyuwangi          | 339,952                            | 57,172                             | 5,946,127                     | TPPR       | 0.0028 |
| 88  | Jatim    | Bondowoso           | 132,124                            | 21,639                             | 6,105,834                     | TPPR       | 0.0028 |
| 89  | Jatim    | Situbondo           | 258,529                            | 28,749                             | 8,992,629                     | TPPR       | 0.0028 |
| 90  | Jatim    | Jember              | 591,890                            | 114,090                            | 5,187,924                     | TPPR       | 0.0028 |
| 91  | Bali     | Badung              | 145,565                            | 17,047                             | 8,539,036                     | TPPR       | 0.0028 |
| 92  | Bali     | Bangli              | 80,964                             | 11,500                             | 7,040,346                     | TPPR       | 0.0028 |
| 93  | Bali     | Buleleng            | 302,045                            | 45,090                             | 6,698,707                     | TPPR       | 0.0028 |
| 94  | Bali     | Gianyar             | 511,199                            | 78,599                             | 6,503,887                     | TPPR       | 0.0028 |
| 95  | Bali     | Jembrana            | 109,085                            | 28,843                             | 3,782,015                     | TPPR       | 0.0028 |
| 96  | Bali     | Tabanan             | 136,122                            | 13,458                             | 10,114,588                    | TPPR       | 0.0028 |
| 97  | Bali     | Klungkung           | 107,098                            | 1,022                              | 104,792,162                   | TPPST      | 0.0273 |
| 98  | Bali     | Karang Asem         | 124,346                            | 63,450                             | 1,959,753                     | TPPSR      | 0.0019 |
| 99  | Kalbar   | Kapuas Hulu         | 19,774                             | 4,684                              | 4,221,623                     | TPPR       | 0.0028 |
| 100 | Kalbar   | Ketapang            | 212,219                            | 13,126                             | 16,167,850                    | TPPSD      | 0.0066 |
| 101 | Kalbar   | Pontianak           | 2,223,482                          | 27,115                             | 82,001,932                    | TPPST      | 0.0273 |
| 102 | Kalbar   | Sambas              | 271,738                            | 6,118                              | 44,416,134                    | TPPT       | 0.0140 |
| 103 | Kalbar   | Sanggau             | 660,524                            | 7,080                              | 93,294,286                    | TPPST      | 0.0273 |
| 104 | Kalteng  | Barito Selatan      | 51,328                             | 488                                | 105,180,881                   | TPPST      | 0.0273 |
| 105 | Kalteng  | Barito Utara        | 46,562                             | 3,309                              | 14,071,188                    | TPPSD      | 0.0066 |
| 106 | Kalteng  | Kapuas              | 99,908                             | 15,140                             | 6,598,927                     | TPPR       | 0.0028 |
| 107 | Kalsel   | Hulu Sungai Selatan | 68,719                             | 17,803                             | 3,859,980                     | TPPR       | 0.0028 |
| 108 | Kalsel   | Hulu Sungai Tengah  | 75,012                             | 8,306                              | 9,031,053                     | TPPR       | 0.0028 |
| 109 | Kalsel   | Hulu Sungai Utara   | 81,373                             | 28,773                             | 2,828,089                     | TPPR       | 0.0028 |
| 110 | Kalsel   | Tabalong            | 25,937                             | 453                                | 57,255,810                    | TPPST      | 0.0273 |
| 111 | Kalsel   | Tanah Laut          | 347,157                            | 12,706                             | 27,322,305                    | TPPSD      | 0.0066 |
| 112 | Kalsel   | Tapin               | 23,602                             | 3,738                              | 6,314,146                     | TPPR       | 0.0028 |
| 113 | Kaltim   | Berau               | 442,321                            | 2,804                              | 157,746,469                   | TPPST      | 0.0273 |
| 114 | Kaltim   | Kutai Kertanegara   | 702,649                            | 19,200                             | 36,596,302                    | TPPT       | 0.0140 |
| 115 | Kaltim   | Pasir               | 58,367                             | 3,962                              | 14,731,751                    | TPPSD      | 0.0066 |
| 116 | Kaltim   | Kab.Bulongan        | 299,341                            | 1,402                              | 213,509,986                   | TPPST      | 0.0273 |

| NO  | PROPINSI  | KABUPATEN      | Nilai Tambah Manufaktur (Rp) | Jumlah TK Manufaktur (Orang) | Produktivitas Tenaga Kerja | Intensitas | Score  |
|-----|-----------|----------------|------------------------------|------------------------------|----------------------------|------------|--------|
| 117 | Kaltim    | Kutai Timur    | 39,718                       | 701                          | 56,659,130                 | TPPST      | 0.0273 |
| 118 | Kaltim    | Nunukan        | 367                          | 579                          | 633,851                    | TPPSR      | 0.0019 |
| 119 | Sulut     | Minahasa       | 113,719                      | 11,178                       | 10,173,451                 | TPPR       | 0.0028 |
| 120 | Sulut     | Sangihe Talaut | 35,124                       | 4,158                        | 8,447,330                  | TPPR       | 0.0028 |
| 121 | Gorontalo | Gorontalo      | 102,643                      | 11,165                       | 9,193,283                  | TPPR       | 0.0028 |
| 122 | Sulteng   | Banggai        | 102,781                      | 7,839                        | 13,111,494                 | TPPR       | 0.0028 |
| 123 | Sulteng   | Toli Toli      | 77,818                       | 2,290                        | 33,981,659                 | TPPSD      | 0.0066 |
| 124 | Sulteng   | Donggala       | 99,309                       | 4,580                        | 21,683,188                 | TPPSD      | 0.0066 |
| 125 | Sulteng   | Morowali       | 38,524                       | 916                          | 42,056,769                 | TPPT       | 0.0140 |
| 126 | Sulteng   | Poso           | 68,443                       | 916                          | 74,719,228                 | TPPST      | 0.0273 |
| 127 | Sultra    | Buton          | 35,937                       | 10,476                       | 3,430,367                  | TPPR       | 0.0028 |
| 128 | Sultra    | Kolaka         | 331,650                      | 1,564                        | 212,052,308                | TPPST      | 0.0273 |
| 129 | Sulsel    | Gowa           | 107,162                      | 6,592                        | 16,256,390                 | TPPSD      | 0.0066 |
| 130 | Sulsel    | Takalar        | 69,415                       | 2,499                        | 27,777,283                 | TPPSD      | 0.0066 |
| 131 | Sulsel    | Jeneponto      | 18,363                       | 815                          | 22,530,957                 | TPPSD      | 0.0066 |
| 132 | Sulsel    | Bantaeng       | 21,693                       | 833                          | 26,042,233                 | TPPSD      | 0.0066 |
| 133 | Sulsel    | Sinjai         | 15,381                       | 833                          | 18,465,018                 | TPPSD      | 0.0066 |
| 134 | Sulsel    | Selayar        | 20,187                       | 833                          | 24,233,866                 | TPPSD      | 0.0066 |
| 135 | Sulsel    | Bone           | 193,937                      | 4,998                        | 38,802,881                 | TPPT       | 0.0140 |
| 136 | Sulsel    | Maros          | 205,505                      | 5,741                        | 35,796,070                 | TPPSD      | 0.0066 |
| 137 | Sulsel    | Pangkep        | 812,623                      | 4,998                        | 162,589,684                | TPPST      | 0.0273 |
| 138 | Sulsel    | Barra          | 28,586                       | 833                          | 34,317,155                 | TPPSD      | 0.0066 |
| 139 | Sulsel    | Pinrang        | 76,436                       | 3,260                        | 23,446,660                 | TPPSD      | 0.0066 |
| 140 | Sulsel    | Majene         | 21,404                       | 2,499                        | 8,564,938                  | TPPR       | 0.0028 |
| 141 | Sulsel    | Enrekang       | 27,755                       | 833                          | 33,319,232                 | TPPSD      | 0.0066 |
| 142 | Sulsel    | Tanah Toraja   | 47,234                       |                              | NA                         |            |        |
| 143 | Sulsel    | Luwu           | 122,033                      | 2,481                        | 49,186,884                 | TPPST      | 0.0273 |
| 144 | Sulsel    | Luwu Utara     | 21,936                       | 3,332                        | 6,583,364                  | TPPR       | 0.0028 |
| 145 | NTB       | Bima           | 37,476                       | 10,602                       | 3,534,775                  | TPPR       | 0.0028 |
| 146 | NTB       | Lombok Barat   | 71,411                       | 28,481                       | 2,507,316                  | TPPR       | 0.0028 |
| 147 | NTB       | Dompu          | 28,817                       | 9,296                        | 3,099,930                  | TPPR       | 0.0028 |
| 148 | NTB       | Lombok Timur   | 179,839                      | 31,544                       | 5,701,212                  | TPPR       | 0.0028 |
| 149 | NTT       | Ende           | 11,919                       | 28,147                       | 423,447                    | TPPSR      | 0.0019 |
| 150 | NTT       | Flores Timur   | 6,604                        | 1,022                        | 6,461,903                  | TPPR       | 0.0028 |
| 151 | NTT       | Manggarai      | 8,138                        | 15,764                       | 516,239                    | TPPSR      | 0.0019 |
| 152 | NTT       | Ngada          | 9,705                        | 3,822                        | 2,539,197                  | TPPR       | 0.0028 |
| 153 | NTT       | TTS            | 6,676                        | 546                          | 12,227,595                 | TPPR       | 0.0028 |
| 154 | NTT       | TTU            | 6,910                        | 8,736                        | 791,019                    | TPPSR      | 0.0019 |
| 155 | NTT       | Belu           | 9,673                        | 15,253                       | 634,202                    | TPPSR      | 0.0019 |
| 156 | NTT       | Sumba Barat    | 8,233                        | 8,701                        | 946,158                    | TPPSR      | 0.0019 |
| 157 | Irjabar   | Fakfak         | 44,821                       |                              | NA                         |            |        |
| 158 | Irjabar   | Manokwari      | 28,586                       | 678                          | 42,162,345                 | TPPT       | 0.0140 |
| 159 | Irjabar   | Sorong         | 138,830                      | 2,712                        | 51,190,863                 | TPPST      | 0.0273 |
| 160 | Papua     | Jayawijaya     | 1,520                        | 551                          | 2,761,418                  | TPPR       | 0.0028 |
| 161 | Irjabar   | Mimika         | 4,583                        | 678                          | 6,760,285                  | TPPR       | 0.0028 |

**Keterangan :**

**TPP** : Tenaga Kerja - Produktivitas - Tenaga Kerja

Dibelakang **TPP** - **ST** : Sangat Tinggi

**T** : Tinggi

**SD** : Sedang

**R** : Rendah

**SR** : Sangat Rendah

Rasio antara Nilai Tambah Manufaktur terhadap Jumlah Tenaga Kerja Manufaktur

Sumber : Data PDRB Atas Dasar Harga Berlaku th 2003, dan Data Sakernas Th.2003, BPS, yang telah diolah

|           |            |            |
|-----------|------------|------------|
| Rata-rata | 24,891,997 |            |
| Standev   | 22,495,586 |            |
| Skew      | 1          |            |
| Kuortis   | 1          |            |
| TPPST     | 47,387,583 | -          |
| TPPT      | 36,139,790 | 47,387,583 |
| TPPSD     | 13,644,204 | 36,139,790 |
| TPPR      | 2,396,411  | 13,644,204 |
| TPPSR     | -          | 2,396,411  |

*KPPOD mengucapkan terimakasih kepada  
The Asia Foundation, USAID, Kadin-Indonesia,  
CSIS, LPEM-FEUI, Sekolah Tinggi Manajemen  
Prasetiya Mulya, The Jakarta Post, Bisnis Indonesia,  
Suara Pembaharuan dan Otorita Pengembangan  
Daerah Industri Pulau Batam  
atas bantuannya  
dalam penyelenggaraan acara penganugerahan  
'KPPOD Award' kepada Kabupaten/ Kota  
yang mendapat peringkat terbaik dalam hal "Daya  
Tarik Investasi Kabupaten/ Kota Tahun 2004"  
yang diselenggarakan tanggal 24 Pebruari 2005  
di Jakarta.*

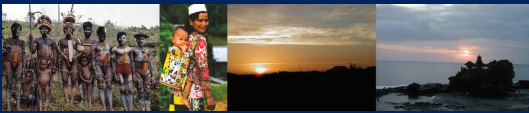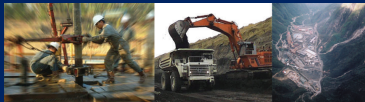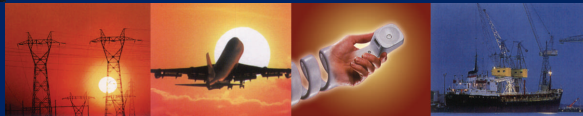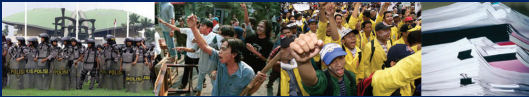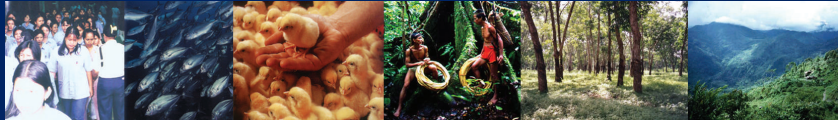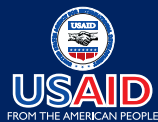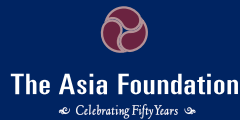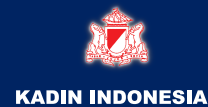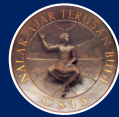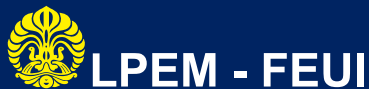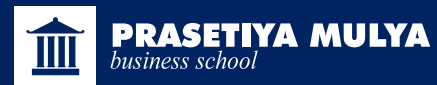

**The Jakarta Post**

**SUARA PEMBARUAN**

**Bisnis Indonesia**

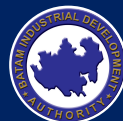

Supplement: MOESM2 [file rating2004.pdf › Data/KPPOD/rating2004.pdf]
