# Supplementary material for: Democratization, leader education and growth: firm-level evidence from Indonesia
Source: Springer Nature journal article supplement (doi:10.1007/s10887-022-09221-5), 2023-02-15
Supplement: MOESM2 [file DPRD 1999 election results.xlsx]

## Sheet: pemilu kab 1999
Province	District	Total	PDIP	Golkar	PPP	PAN	Lain	PKD	PDKB	Krisna	PK	PKP	PKB	PNU	PNI	PBI	PBB	PSII	PUI	Abul Yatama	PKU	PP	PDR	SUNI	PDI	Rep	IPKI	Murba
DKI Jakarta	Kodya Jakarta Barat	0
DKI Jakarta	Kodya Jakarta Pusat	0
DKI Jakarta	Kodya Jakarta Selatan	0
DKI Jakarta	Kodya Jakarta Timur	0
DKI Jakarta	Kodya Jakarta Utara	0
Jawa Barat	Bandung	99.8	36.1	25.6	10.4	7.5	8.8						6.1				5.3
Jawa Barat	Bekasi	100	32.7	31	11.3	6.4	7.2				3.4		4.2				3.8
Jawa Barat	Bogor	100.1	29.3	27.4	18.1	5.6	9.7				4.4		3.1				2.5
Jawa Barat	Garut	100	17.9	26	21.4	6.7	11.4						12.2				4.4
Jawa Barat	Indramayu	100.1	42.6	25.2	4.2	3.5	9.1						15.5
Jawa Barat	Karawang	99.9	38.7	31.2	9.4	3.9	7.7						6.1				2.9
Jawa Barat	Kuningan	100.1	41.6	19	16	5.8	7.8						7.4				2.5
Jawa Barat	Lebak	100.1	41	20.1	15.3		16.6						4.4				2.7
Jawa Barat	Majalengka	100.1	37.1	17.5	13.5	4.5	9.7						12.7				5.1
Jawa Barat	Pandeglang	100.1	29.1	21.8	25	2.5	15.3						3.3				3.1
Jawa Barat	Purwakarta	100	21.7	39.2	13.1	4.4	7.7						9.2				4.7
Jawa Barat	Serang	100	26.7	19	21.2	5.7	16.1				2.9		5.6				2.8
Jawa Barat	Subang	100	43.5	28.4	7.7	2.8	9.9						7.7
Jawa Barat	Sukabumi	100	24.9	31.5	23.7	2.7	12.7						4.5
Jawa Barat	Sumedang	100	35.2	34.8	9.8	3.9	8						5				3.3
Jawa Barat	Tangerang	99.8	39.3	16.6	15.2	9.8	11.5				2.9		4.5
Jawa Barat	Tasikmalaya	100.2	19.1	22.4	26.8	5.8	9.2						11.9				5
Jawa Barat	Ciamis	100	30.4	25	21.4	4.3	9						6.1				3.8
Jawa Barat	Cianjur	100.1	24.7	29.5	25		13.3						3.5				4.1
Jawa Barat	Cirebon	100	43.1	12.6	6.1	6	9						23.2
Jawa Barat	Kota Bandung	100.1	35.8	15.6	8.6	18.7	6.9				4.2		4.3				6
Jawa Barat	Kota Bekasi	100.1	33.2	16.2	13.1	18.8	6.2				5.2		3.8				3.6
Jawa Barat	Kota Bogor	100.1	31.1	20.7	16.2	10.9	8.2				6.8		3				3.2
Jawa Barat	Kota Cilegon	100	23.7	16.7	23.3	14.2	9.8				3.2		5.9				3.2
Jawa Barat	Kota Cirebon	99.9	35.7	20.8	6.1	14	10.7				4		8.6
Jawa Barat	Kota Depok	100	29.7	16.2	17	16.2	10.4				7		3.5
Jawa Barat	Kota Sukabumi	100.1	25.5	25.2	22.8	8	8.1				2.6		2.5				5.4
Jawa Barat	Kota Tangerang	100	36.7	14.8	15.1	13.1	7.1				3.9		5.7				3.6
Jawa Tengah	Banjarnegara	100	42.3	14.8	7.2	8.4	8.6						13.2					5.5
Jawa Tengah	Banyumas	100.1	47.5	13.2	5.4	7.5	7.2						19.3
Jawa Tengah	Batang	100	42.2	9.1	15.8	4.7	8						20.2
Jawa Tengah	Blora	100.1	45.5	19.3	8.3	3.4	9.2						14.4
Jawa Tengah	Boyolali	100	43.5	17.4	6.9	9.6	12						10.6
Jawa Tengah	Brebes	100.1	41.2	10.5	6	6.6	8.4						27.4
Jawa Tengah	Demak	100.1	32	7.5	24.6	2.7	7.2						26.1
Jawa Tengah	Jepara	100	19.5	8.3	44	3.7	6.6						17.9
Jawa Tengah	Grobogan	99.9	47	14.5	7	2.6	9.1						19.7
Jawa Tengah	Karanganyar	100	56.4	17.6	3.5	7.7	12.1						2.7
Jawa Tengah	Kebumen	100	38.9	12	12.4	5.1	10.4						21.2
Jawa Tengah	Kendal	100.1	32.5	9.9	14.1	6.8	8.4						28.4
Jawa Tengah	Klaten	94.2	55.4	11.8	5.2	13.3	8.5
Jawa Tengah	Kudus	100.1	37.1	6.8	19.1	6.7	6.8						23.6
Jawa Tengah	Magelang	99.9	26.5	10	15.6	8.6	8.8						30.4
Jawa Tengah	Pati	100.2	51	9.5	6.1	3.2	9.6						20.8
Jawa Tengah	Pekalongan	100	42.9	8.2	8.4	8.1	6.8						25.6
Jawa Tengah	Pemalang	100.1	40.4	14.5	19.1	4.9	6.3						14.9
Jawa Tengah	Purbalingga	99.9	43.8	14.5	8.2	9.9	8.8						14.7
Jawa Tengah	Purworejo	100	43.2	16.9	8.9	4.9	9.6						16.5
Jawa Tengah	Rembang	100.1	31.9	14.8	23.5	2.7	8.9						18.3
Jawa Tengah	Semarang	99.9	35.2	17.4	16.6	5.9	9.7						15.1
Jawa Tengah	Sragen	100	52.5	15.2	3.9	7.9	12.1						8.4
Jawa Tengah	Sukoharjo	99.9	57.3	12.7	4.6	12.2	10.3						2.8
Jawa Tengah	Tegal	100	36.6	9.2	9.6	7	8.3						29.3
Jawa Tengah	Temanggung	100	34.8	11.8	17	4.3	11						21.1
Jawa Tengah	Cilacap	100	41.5	21.7	9.6	5.3	8.2						13.7
Jawa Tengah	Wonogiri	100.1	53	21.7	9.4	4.9	8.3						2.8
Jawa Tengah	Wonosobo	100.1	34.1	11.4	15.4	5.6	7.5						26.1
Jawa Tengah	Kota Magelang	100	44.3	20.8	3.3	9.6	9.8					3.6	8.6
Jawa Tengah	Kota Pekalongan	99.9	32.3	9.8	27.1	8.6	5.7						16.4
Jawa Tengah	Kota Salatiga	100.1	40.5	20.2	8.3	9.2	11.7						10.2
Jawa Tengah	Kota Semarang	100	50.5	13.1	5	11.2	9.5						10.7
Jawa Tengah	Kota Surakarta	100	56.8	12.4	3.7	14.1	13
Jawa Tengah	Kota Tegal	100	44.1	13.3	4.6	12.2	8.8						17
DI Yogyakarta	Bantul	100.1	32.3	11.4	5.8	16.9	14.3						19.4
DI Yogyakarta	Gunung Kidul	100.1	36.8	21.9	3.2	10.3	15.8						12.1
DI Yogyakarta	Kulon Progo	100	31.4	16.2	4.8	14.3	15						18.3
DI Yogyakarta	Sleman	100.1	35.8	11.7	5.7	18.7	13.9						14.3
DI Yogyakarta	Kota Yogyakarta	99.9	41.8	11.7	5.6	24.6	11.1						5.1
Jawa Timur	Bangkalan	100.1	17.6	7.6	3.7		12.5						58.7
Jawa Timur	Banyuwangi	99.9	30	10.1	3	3.7	6.1						47
Jawa Timur	Blitar	100.1	41.2	16	2.7		7.7						32.5
Jawa Timur	Bojonegoro	100	33	18.2	3.3	5.7	8.5						31.3
Jawa Timur	Bondowoso	100	10.4	7.3	5.6		8						68.7
Jawa Timur	Gresik	100.1	28.7	7.3	4.4	8.4	6.8						44.5
Jawa Timur	Jember	100	26.3	10.5	9.4	3.3	9.2						41.3
Jawa Timur	Jombang	100	40.1	10.7	8.1	4.1	8.1						28.9
Jawa Timur	Kediri	100	39.8	12		3.2	9.8						35.2
Jawa Timur	Lamongan	100	24.3	11		12.1	10.1						42.5
Jawa Timur	Lumajang	100	38.1	14.7	4.3	2.5	7.2						33.2
Jawa Timur	Madiun	99.9	44.4	15		3.1	11.6						25.8
Jawa Timur	Magetan	100	51.4	13.1		4.6	13.8						17.1
Jawa Timur	Malang	100	38.5	18.3	3.5	2.9	7.2						29.6
Jawa Timur	Mojokerto	100	40.3	10.7	3.7	3.3	7.4						34.6
Jawa Timur	Nganjuk	99.9	42.6	16.5		2.7	9.8						28.3
Jawa Timur	Ngawi	100	47.9	14.5	3.8	4.4	12.4						17
Jawa Timur	Pamekasan	99.9	11.6	9.1	40	3.1	8.9						27.2
Jawa Timur	Pasuruan	100.1	20.7	12.1	3.3	2.5	7.8						53.7
Jawa Timur	Pacitan	100	37.4	30.3	3.4	4.4	8.9						15.6
Jawa Timur	Ponorogo	100	32.1	18.5	3.2	6	11.3						28.9
Jawa Timur	Probolinggo	99.9	20.6	10.3	10.8		10.1						48.1
Jawa Timur	Sampang	100.1	10.7	11.3	26.9		9.4						41.8
Jawa Timur	Sidoarjo	100	41	9.4		8	7.1						34.5
Jawa Timur	Situbondo	100	13.2	7.2			8.9						70.7
Jawa Timur	Sumenep	100	10.6	7.2	7.4	3	10						61.8
Jawa Timur	Trenggalek	100	33.9	14.2		4.2	7						40.7
Jawa Timur	Tuban	99.9	33.3	18.2	7.8	3.5	10.4						26.7
Jawa Timur	Tulungagung	100.1	39.7	16.3		3.5	7.6						33
Jawa Timur	Kota Blitar	100.1	46	19.7	4.6	3.7	7.5						18.6
Jawa Timur	Kota Kediri	100	45.5	14.8		5.4	8.2						26.1
Jawa Timur	Kota Madiun	100.1	50.2	20.9		7.4	11.7						9.9
Jawa Timur	Kota Malang	100	41.2	16.1	2.8	10.5	9.8						19.6
Jawa Timur	Kota Mojokerto	100	44.2	14.6		8.1	9.2					2.9	21
Jawa Timur	Kota Pasuruan	100	26.4	15.4	5.3	5	7.9						40
Jawa Timur	Kota Probolinggo	100	32.8	14	19.2	5	6.8						22.2
Jawa Timur	Kota Surabaya	100	53.9	8.4		10.7	8.9						18.1
Kalimantan Barat	Bengkayang	100.1	26.7	31.4	6		16.6		3.2							8.2									8
Kalimantan Barat	Kapuas Hulu	100	15.7	27.2	18.6		15.8		4.9							12.7									5.1
Kalimantan Barat	Ketapang	100.2	21.1	37.5	16.4	2.8	11.6		2.6				2.5			2.7									3
Kalimantan Barat	Pontianak	0
Kalimantan Barat	Sambas	100.1	26.5	32.3	13.4		18.5									9.4
Kalimantan Barat	Sanggau	100.2	17.3	33.6	4.6		12		6.2							7.7									18.8
Kalimantan Barat	Sintang	100.1	21.4	32	7.8	3	14		3.1							7.5									11.3
Kalimantan Barat	Kota Pontianak	100.1	26.9	21.4	16	6.2	12.1						3.7			10.8	3
Kalimantan Tengah	Barito Selatan	0
Kalimantan Tengah	Barito Utara	0
Kalimantan Tengah	Kapuas	0
Kalimantan Tengah	Kotawaringin Barat	0
Kalimantan Tengah	Kotawaringin Timur	0
Kalimantan Tengah	Kota Palangka raya	100	44.3	17.6	7.9	5.5	14.1			2.6			4.6				3.4
Kalimantan Selatan	Banjar	99.9	14.3	21.3	20.3	7.9	10.6						17.2	5.2			3.1
Kalimantan Selatan	Barito Kuala	99.9	19.2	29.5	20.8	5	11.8						6.8	3			3.8
Kalimantan Selatan	Hulu Sungai Selatan	100.1	17.9	19.1	17	8.2	11.7				3.2		7.5	8.8			6.7
Kalimantan Selatan	Hulu Sungai Tengah	100	13.3	25.4	20.3	9.2	10.3				4.5		4.9	6.5			5.6
Kalimantan Selatan	Hulu Sungai Utara	100.1	12.1	20.5	28.1	7.3	11.1						9.3	9.1			2.6
Kalimantan Selatan	Kota Baru	100	28.5	32.6	12.1	2.8	14.3						9.7
Kalimantan Selatan	Tabalong	100	20.7	25.2	16.8	9.2	13.1						4.5	5.5			5
Kalimantan Selatan	Tanah Laut	100	25.4	27.4	14	3.7	13.5						9.1	4.3			2.6
Kalimantan Selatan	Tapin	100.1	10.6	26.3	13	5.4	14.9						21.4	5.4			3.1
Kalimantan Selatan	Kota Banjar Baru	100	30.1	27.1	11.9	9.3	10						7.3				4.3
Kalimantan Selatan	Kota Banjarmasin	0
Kalimantan Timur	Berau	0
Kalimantan Timur	Bulongan	0
Kalimantan Timur	Kutai	0
Kalimantan Timur	Pasir	0
Kalimantan Timur	Kota Balikpapan	100	37.4	21.4	10.3	11	11.3						5				3.6
Kalimantan Timur	Kota Samarinda	0
Kalimantan Timur	Kota Tarakan	100	32.8	39.2	6	4.7	12.2						5.1
Maluku	Halmahera Tengah	100	13.1	45.1	19.2		15.6		3.2																3.8
Maluku	Maluku Tengah	100	21.1	22.8	26.6		19.9				3.3						3.2						3.1
Maluku	Maluku Tenggara	100.3	37.3	20	6.3		8.7	5.6	7.3	2.9		6.1													3.2	2.9
Maluku	Maluku Utara	100	17.8	40.8	17	3.1	17.2		4.1
Maluku	Kota Ambon	100	49.2	18.2	16		13.3		3.3
Maluku	Kota Ternate	99.9	17.7	43.3	20.4	5.1	13.4
Bali	Badung	100	77.5	13.4			9.1
Bali	Bangli	100.1	78.4	11.3			6.3					4.1
Bali	Buleleng	100.1	77.2	10.5			9.6						2.8
Bali	Jembrana	100	61.3	16.5	6.7		10.1						5.4
Bali	Gianyar	100	86	7.8			6.2
Bali	Karang asem	100	77.3	12.4			10.3
Bali	Klungkung	100	78	10			9.2								2.8
Bali	Tabanan	100	86.9	7.2			5.9
Bali	Kota Denpasar	100	76.5	9.7		3.9	6.8						3.1
Nusa Tenggara Barat	Bima	99.9	5.8	50.4	8.6	7.3	19.8							3.2			4.8
Nusa Tenggara Barat	Dompu	100	6.5	49.9	6.6	6.4	21										6.4	3.2
Nusa Tenggara Barat	Lombok Barat	100	16.1	29.1	17.6		23.6						3.6	3			3.8						3.2
Nusa Tenggara Barat	Lombok Tengah	100	8.6	49.1	9.3		17.4						6.5	2.6			3.9						2.6
Nusa Tenggara Barat	Lombok Timur	100	9.2	44.2	9	3	25.4										2.5						6.7
Nusa Tenggara Barat	Sumbawa	100	22.8	40.1	13.4	4.7	13.7						2.4				2.9
Nusa Tenggara Barat	Kota Mataram	100	30.2	23.5	15.7	6.7	15.4						3.1				5.4
Nusa Tenggara Timur	Alor	100.1	9.4	56	13		11.9			9.8
Nusa Tenggara Timur	Belu	100	32.5	44.6		2.7	13.5		4.1			2.6
Nusa Tenggara Timur	Ende	100	49.1	21.7	6.9		18.3		4
Nusa Tenggara Timur	Flores Timur	100.2	42.3	30.9	5.3	3.1	9.1	3.1	3.1								3.3
Nusa Tenggara Timur	Kupang	100	29.6	54.4			13.4			2.6
Nusa Tenggara Timur	Manggarai	100	44.7	28.5			13.4		7.9			5.5
Nusa Tenggara Timur	Ngada	99.9	43.7	34.8		4.8	8		4.7			3.9
Nusa Tenggara Timur	Sikka	100	52.7	29.6			11	3.9																	2.8
Nusa Tenggara Timur	Sumba Barat	100.1	46	28.2			11.8		11.4						2.7
Nusa Tenggara Timur	Sumba Timur	99.9	34.7	42.6			9.1			3.3															3.4		6.8
Nusa Tenggara Timur	Timor Tengah Selatan	100	13.8	77			9.2
Nusa Tenggara Timur	Timor Tengah Utara	100	35.2	48.9			8.8	3.8	3.3
Nusa Tenggara Timur	Kota Kupang	99.9	37.4	37.9	2.6		10		5.4	4		2.6
Sulawesi Selatan	Bantaeng	99.9	2.6	70.3	6.4	7.1	10.5						3
Sulawesi Selatan	Barru	100		68.5	9.6		14.3											3.9									3.7
Sulawesi Selatan	Bone	99.9		77.4	9.9		12.6
Sulawesi Selatan	Bulukumba	99.9	2.7	66.5	6.2	3.7	20.8
Sulawesi Selatan	Jeneponto	100		61.4	7.6	4.6	18.1						3.5														4.8
Sulawesi Selatan	Enrekang	100		64.2	10.4	7.8	10.3										4.8										2.5
Sulawesi Selatan	Luwu	100	11.2	57.5	7.8	3.5	13.5						2.6				3.9
Sulawesi Selatan	Luwu Utara	99.9	13.6	57	7.8	3.2	14.7						3.6
Sulawesi Selatan	Majene	100.1	4.1	62.1	9.2	3.4	14.9						3.9				2.5
Sulawesi Selatan	Mamuju	100.1	13.6	59.1	9.7		15						2.7
Sulawesi Selatan	Maros	100.1	2.7	67.9	11.2	2.7	13.1						2.5
Sulawesi Selatan	Pangkajene Kepulauan	100		73.6	11.6		14.8
Sulawesi Selatan	Pinrang	100.1		63.6	14.1		19.9						2.5
Sulawesi Selatan	Polewali Mamasa	100	9.9	60.5	10.4		15.3		3.9
Sulawesi Selatan	Selayar	100	4.1	54	10.3	11.7	12						5.2					2.7
Sulawesi Selatan	Sidenreng Rappang	100		75.4	10.6		14
Sulawesi Selatan	Sinjai	100		71.6	11.8		13.9				2.7
Sulawesi Selatan	Soppeng	100		84.2	5.3		10.5
Sulawesi Selatan	Takalar	100	3	72.8	5.2		16.4																				2.6
Sulawesi Selatan	Tana Toraja	99.9	27.8	35.8			19.4	4.4	7.5	5
Sulawesi Selatan	Wajo	100		78.9	5.5	3.5	8.9						3.2
Sulawesi Selatan	Gowa	100	3.2	68.3	7.2	4.1	13.8																3.4
Sulawesi Selatan	Kota Parepare	99.9	5.1	65.6	8.5	2.9	15.3										2.5
Sulawesi Selatan	Kota Makassar	100	12.4	55.4	10.6	7.3	11.5										2.8
Sulawesi Tenggara	Buton	100	19.3	53.3	9.7	2.5	9.1										6.1
Sulawesi Tenggara	Kendari	100	13.1	65.5	2.7	3	11.6						4.1
Sulawesi Tenggara	Kolaka	99.9	6.6	69.3	9.6		10.4										4
Sulawesi Tenggara	Muna	100.1	14.8	57.4	7.6		17.4										2.9
Sulawesi Tenggara	Kota Kendari	100	13.3	64.6	4.8	3.2	9.4										4.7
Sulawesi Tengah	Banggai	0
Sulawesi Tengah	Buol Toli-Toli	0
Sulawesi Tengah	Donggala	100	13.8	51.5	11		20.2											3.5
Sulawesi Tengah	Poso	0
Sulawesi Tengah	Kota Palu	0
Sulawesi Utara	Bolaang Mongondow	100.1	13.1	54.3	6.4	3.5	12.7			3.8								6.3
Sulawesi Utara	Gorontalo	100	6.9	61.8	15.7		15.6
Sulawesi Utara	Minahasa	93.3	31.5	39.4			7.8	3.2	2.7			5											3.7
Sulawesi Utara	Sangihe Talaud	99.9	30.3	50.3			12.2					7.1
Sulawesi Utara	Kota Bitung	100	26.1	37.1	6.9		17.7			4.8		7.4
Sulawesi Utara	Kota Gorontalo	100	6.1	58.4	18.5	6.7	10.3
Sulawesi Utara	Kota Manado	100	29.9	35.4	9	2.5	14			6.3		2.9
Aceh	Aceh Barat	106	13.6	9.9	32	16.8	27.7					2.8		3.2
Aceh	Aceh Besar	103.4	4.1	7	44.2	20.9	17.2				2.3						4.2			3.5
Aceh	Aceh Selatan	99.9	4.5	9.9	35.4	18.6	15.8							4.3			2.6			3.2	5.6
Aceh	Aceh Singkil	104.1	14.8	23.9	19	6.7	21.8		4			8.1		5.8
Aceh	Aceh Tengah	104.2	14	15.3	31.2	11.5	24.5					4.1					3.6
Aceh	Aceh Tenggara	104.5	13.7	31.8	24.3	10.3	12.4										4.4					2.9	4.7
Aceh	Aceh Timur	99.9	27.7	22.4	16.5	15.5	17.8
Aceh	Aceh Utara	100	12.2	27.6	9.2	23.1	11.1					13.8					3
Aceh	Pidie	99.9	12.1	24.5	20.6	21.9	15.2				5.6
Aceh	Simeulue	100	9.3	13.8	36.1	17.4	15.7										7.7
Aceh	Kota Banda Aceh	99.9	7.5	13.7	22	36.7	12				4.5						3.5
Aceh	Kota Sabang	99.9	5.6	36.8	31.5	12.5	13.5
Sumatera Utara	Asahan	100	38.9	22.9	15.1	8	15.1
Sumatera Utara	Dairi	99.9	39.4	25.8		5.5	15	4.7	5.9	3.6
Sumatera Utara	Deli Serdang	100	48.2	20.1	9.5	7.9	14.3
Sumatera Utara	Karo	104.1	66.4	14.2		2.5	16.9					4.1
Sumatera Utara	Labuhan Batu	100	35.2	26.6	15.7	6	16.5
Sumatera Utara	Langkat	100	43.4	23	12.3	6.7	14.6
Sumatera Utara	Mandailing Natal	103	10.1	21.8	30.1	13.5	17.2				2.8	2.9	4.6
Sumatera Utara	Nias	100	30.6	14.5			19.3	5.9	26.9			2.8
Sumatera Utara	Simalungun	100	43.1	33.5	5.4	2.9	15.1
Sumatera Utara	Tapanuli Selatan	99.9	17	30.3	20.1	7.5	19.4						3.3	2.3
Sumatera Utara	Tapanuli Tengah	102.7	25.7	28.7	5.9	8	14.1	4.5	9.4	2.7			3.7
Sumatera Utara	Tapanuli Utara	100	39.8	27.8			17.8	4	4.3	6.3
Sumatera Utara	Toba Samosir	100.1	44.8	25.4			12.4	6.7	3.8			3.2			3.8
Sumatera Utara	Kota Binjai	100	37.9	19.7	10.5	11.8	14.7									2.5	2.9
Sumatera Utara	Kota Medan	99.9	40.5	13.5	9.2	19.8	13.8									3.1
Sumatera Utara	Kota Pematang Siantar	100	48.1	19.2	5	7.2	14.7		2.6			3.2
Sumatera Utara	Kota Sibolga	100	31.5	24.8	7.3	12.2	12.5		7.5				4.2
Sumatera Utara	Kota Tanjung Balai	99.9	25.6	17.7	11.2	13.1	16.9				5.1					4.1		2.7	3.5
Sumatera Utara	Kota Tebing Tinggi	100	32.7	25.3	10.7	12.3	19
Sumatera Barat	Agam	100	6.6	18.2	25	27	12.9				2.6						7.7
Sumatera Barat	Lima Puluh Koto	100	7.8	23.2	27.1	15.5	17.6										8.8
Sumatera Barat	Padang Pariaman	100	14.3	15.1	23.2	19.2	19.4				3.5						5.3
Sumatera Barat	Pasaman	100.1	10	28	26.9	15.5	16.6										3.1
Sumatera Barat	Pesisir Selatan	100	13.2	25.3	21.2	20.2	16.2										3.9
Sumatera Barat	Kota Sawah Lunto	100	11.6	40.4	9.1	20.9	11.7				2.5						3.8
Sumatera Barat	Solok	100	6.1	33.5	20.4	16.2	14.7				2.8						6.3
Sumatera Barat	Tanah Datar	99.9	9.6	25	22.9	22.2	11.5				4.1						4.6
Sumatera Barat	Kota Bukittinggi	100.1	8.8	21.3	17.9	28.3	9.8				3.4						10.6
Sumatera Barat	Kota Padang	100.1	13.6	17.4	13.7	34	11.3				4.2						5.9
Sumatera Barat	Kota Padang Panjang	100	10.2	24.6	18.9	21.7	9.6				6.4						8.6
Sumatera Barat	Kota Payakumbuh	100	14.1	21	20.8	19.9	13.1										11.1
Sumatera Barat	Sawahlunto/Sijunjung	100	15	33.6	10.7	15.5	20.9										4.3
Sumatera Barat	Kota Solok	100.1	8.5	32.9	13.6	19.7	12.4				2.9	2.6					7.5
Riau	Bengkalis	100	32.2	25.8	14.9	8.4	15.7						3
Riau	Indragiri Hilir	100.1	21.7	31.2	17.8	3.2	21.4						4.8
Riau	Indragiri Hulu	100.1	20.9	42.9	12.8	8.4	12.3						2.8
Riau	Kampar	100	22.1	34.8	14.8	8.7	16.4						3.2
Riau	Kepulauan Riau	99.9	34.9	30.6	10.7	8.2	15.5
Riau	Kota Batam	100	36.2	24	6	14.1	11.1						5.4			3.2
Riau	Kota Dumai	100.1	31	19.7	11.7	16.8	20.9
Riau	Kota Pekanbaru	100.2	22.6	23.4	15.1	20.7	13.1										5.3
Jambi	Batang Hari	100.1	26.7	36.5	10.3	3.9	16.5						6.2
Jambi	Kerinci	99.9	13	29.1	12.8	16.4	23.8																	4.8
Jambi	Bungo Tebo	99.9	25.9	33.8	11.8	7.4	16.8						4.2
Jambi	Sarolangun Bangko	100	22.9	35.5	11	4.9	15.9						6.6				3.2
Jambi	Tanjung Jabung	100	18.5	41.7	12.3	6.4	12.8						8.3
Jambi	Kota Jambi	100	36.9	28.3	8.5	8.9	11.5					2.7					3.2
Sumatera Selatan	Bangka	100	37.5	25.2	14.2	5	14										4.1
Sumatera Selatan	Belitung	100	25.9	19.2	4.1	3.3	17.9										29.6
Sumatera Selatan	Lahat	100.1	40.3	22.2	5.5	10.9	18.6										2.6
Sumatera Selatan	Muara Enim	100	40.3	25.4	6.5	7	18.1										2.7
Sumatera Selatan	Musi Banyuasin	100	39	24.5	9.6	5.4	15.3						6.2
Sumatera Selatan	Musi Rawas	100	39.2	25.8	5.7	6.4	17.4						5.5
Sumatera Selatan	Ogan Komering Ilir (OKI)	99.9	38.8	21.5	9.7	5.5	14.7				2.8		6.9
Sumatera Selatan	Ogan Komering Ulu (OKU)	100	34.4	21.9	9.3	6.5	15.9						12
Sumatera Selatan	Kota Palembang	100.1	42.7	17.1	8.7	13.6	18
Sumatera Selatan	Kota Pangkal Pinang	100.1	38.3	22.7	11.6	7.7	12.2						3				4.6
Bengkulu	Bengkulu Selatan	100.1	30.4	22	7.3	8.7	22				2.7	3.3	3.7
Bengkulu	Bengkulu Utara	99.8	29.1	28.7	8.4	5.1	20				3.1		5.4
Bengkulu	Rejang Lebong	100	28.6	34.6	9.6	6.1	18.2						2.9
Bengkulu	Kota Bengkulu	99.9	31.7	27.9	8.2	8.5	11.7				4.2		2.7				5
Lampung	Lampung Barat	99.9	36.8	16	13.8	4.5	17.4						8.8	2.6
Lampung	Lampung Selatan	100.1	43	18.1	9.9	4.3	16.2						8.6
Lampung	Lampung Tengah	97.2	38.4	23.1	5.2	3.7	11.2						15.6
Lampung	Lampung Timur	100.1	44.5	16.7	5	4.1	13						16.8
Lampung	Lampung Utara	100	32.2	26.4	8.3	5.3	14.2				3	2.6	8
Lampung	Tanggamus	100	36.4	16.8	11.1	4.8	16.4						14.5
Lampung	Tulang Bawang	100	46.5	17.7	5	3.6	12.9						14.3
Lampung	Kota Bandar Lampung	100	39.5	17.2	10.8	11.3	13.6				4.1		3.5
Lampung	Kota Metro	100	38.7	23.3	6.8	9.2	10.3				2.7		6.5				2.5
Irian Jaya	Biak Numfor	100	31.5	32.4		3.5	18.5			10.1															4
Irian Jaya	Fakfak	99.9	27.6	29.2	7.4	4.8	11.6		3.8				11												4.5
Irian Jaya	Jayapura	100.1	36.1	37.8	2.6		20.6																		3
Irian Jaya	Jayawijaya	100	32.6	33.5			7.5		21.3																5.1
Irian Jaya	Manokwari	99.9	30.2	49.8			13.5		3.4														3
Irian Jaya	Merauke	100.1	32.1	23.1	2.6	9.5	11.2	14.5																	7.1
Irian Jaya	Mimika	0
Irian Jaya	Nabire	99.8	22.3	41.5	3.2		8.3		3.9	4.7			4.8												2.7			8.4
Irian Jaya	Paniai	0
Irian Jaya	Puncak Jaya	0
Irian Jaya	Sorong	100	36.2	40.5	6.7	3.1	10.6						2.9
Irian Jaya	Yapen Waropen	99.9	35.5	35.6		3.9	17.8		3.5														3.6
Irian Jaya	Kota Jayapura	100.1	31.2	43.5	5.6	3.5	13.3			3
