# Supplementary material for: Democratization, leader education and growth: firm-level evidence from Indonesia
Source: Springer Nature journal article supplement (doi:10.1007/s10887-022-09221-5), 2023-02-15
Supplement: MOESM2 [file ICW 2007.pdf › Data/Mayor-level corruption dataset (incl sources)/ICW 2007.pdf]

**ORIGINAL NEWS ARTICLE** (<https://news.detik.com/berita/d-832658/41-bupati-terkait-kasus-korupsi>)

Jakarta - Tahun 2007 ini, 41 bupati dari seluruh Indonesia terkait kasus korupsi. Status hukumnya beragam, ada yang dalam proses penyelidikan, penyidikan, penuntutan dan bahkan sudah divonis bersalah. 17 Bupati di antaranya berstatus saksi atau kasusnya masih dalam penyelidikan dan tidak menutup kemungkinan menjadi tersangka. 20 Bupati sudah ditetapkan menjadi tersangka korupsi. 2 Bupati, yakni Bupati Kutai Kartanegara Syaukani HR dan Bupati Semarang Bambang Guritno sudah memasuki tahap penuntutan sebagai terdakwa korupsi. Kemudian dua bupati sudah divonis, salah satunya Bupati Kendal Hendy Boedoro yang baru saja divonis 5 tahun penjara oleh Pengadilan Tipikor Selasa 18 September 2007 lalu. Berikut daftar 41 bupati tersebut berdasarkan data yang dikumpulkan Indonesian Corruption Watch (ICW) per 20 September 2007 yang disusun menurut abjad provinsi:

1. Bupati Pandeglang, Banten, Achmad Dimyati Natakusumah, status diambil keterangan
2. Bupati Bone Bolango, Gorontalo, Ismet Mile, status tersangka
3. Bupati Sarolangun, Jambi, Muhammad Madel, status diambil keterangan
4. Bupati Garut, Jawa Barat, Agus Supriadi, status tersangka
5. Bupati Purwakarta, Jawa Barat, Lili Hambali Hasan, status diambil keterangan
6. Bupati Kendal, Jawa Tengah, Hendy Boedoro, terdakwa
7. Bupati Pemalang, Jawa Tengah, M Machroes, status diambil keterangan
8. Bupati Semarang, Jawa Tengah, Bambang Guritno, sedang diadili
9. Bupati Wonogiri, Jawa Tengah, Begug Purnomosidi, status diambil keterangan
10. Bupati Madiun, Jawa Timur, H Djunaedi Mahendra, status tersangka
11. Bupati Magetan, Jawa Timur, Saleh Muljono, status tersangka
12. Bupati Malang, Jawa Timur, Sujud Pribadi, status diambil keterangan
13. Bupati Pamekasan, Jawa timur, Achmad Syafii Yasin, status diambil keterangan
14. Bupati Pasuruan, Jawa Timur, H. Jusbakir Aldjufri, status diambil keterangan
15. Bupati Sidoarjo, Jawa Timur, Wien Hendrarso, status diambil keterangan
16. Bupati Situbondo, Jawa Timur, Ismunarso, status tersangka
17. Bupati Ketapang, Kalimantan Barat, Morkes Effendi, status diambil keterangan
18. Bupati Sintang, Kalimantan Barat, Milton Crosby, status diambil keterangan
19. Bupati Tanah Laut, Kalimantan Selatan, Ardiansyah, status tersangka
20. Bupati Barito Selatan, Kalimantan Tengah, Baharudin H Lisa, status diambil keterangan
21. Bupati Barito Utara, Kalimantan Tengah, Achmad Yuliansyah, status tersangka
22. Bupati Lamandau Bustani, Kalimantan Tengah, Hj Mahmud, status tersangka
23. Bupati Kutai Kartanegara, Kalimantan Timur, Syaukani HR, sedang diadili
24. Bupati Penajam Paser Utara, Kalimantan Timur, Yusran Aspar, status tersangka
25. Bupati Tulang Bawang, Lampung, Abdurachman Sarbini, status diambil keterangan
26. Bupati Dompu, Nusa Tenggara Barat, Abu Bakar Ahmad, terdakwa
27. Bupati Lombok Barat, Nusa Tenggara Barat, Iskandar, status diambil keterangan
28. Bupati Kupang, Nusa Tenggara Timur, Ibrahim Agustinus Medah, status tersangka
29. Bupati Rote Ndao, Nusa Tenggara Timur, Christian Nehemia Dillak, status tersangka
30. Bupati Timor Tengah Selatan, Nusa Tenggara Timur, Daniel Banunaeak, status diambil keterangan
31. Bupati Jayawijaya, Papua, David Agustein Hubi, status tersangka
32. Bupati Nabire, Papua, Drs Anselmus Petrus Youw, status tersangka
33. Bupati Pelalawan, Riau, Tengku Azmun Jaafar, status tersangka
34. Bupati Mamasa, Sulawesi Barat, HM Said Saggaf, status diambil keterangan
35. Bupati Luwu, Sulawesi Selatan, Basmin Mattayang, status tersangka
36. Bupati Tana Toraja, Sulawesi Selatan, Johanis Amping Situru, status tersangka
37. Bupati Morowali, Sulawesi Tengah, Andi Muhammad AB, status tersangka
38. Bupati Muaraenim, Sumatera Selatan, Kalamudin Djinab, status diambil keterangan
39. Bupati Ogan Komering Ulu Selatan, Sumatera Selatan, Muhtadin Serai, status tersangka
40. Bupati Nias, Sumatera Utara, Bina B Bahaiak, status tersangka
41. Bupati Sleman, Yogyakarta, Ibnu Subiyanto, status saksi (sebelumnya ditulis sebagai tersangka-Red).

## TRANSLATION TO ENGLISH

1. Regent of Pandeglang, Banten, Achmad Dimiyati Natakusumah, information taken from status.

Regent of Bone Bolango, Gorontalo, Ismet Mile, suspect status

3. Regent of Sarolangun, Jambi, Muhammad Madel, information taken

4. Regent of Garut, West Java, Agus Supriadi, suspect status

5. Regent of Purwakarta, West Java, Lili Hambali Hasan, information taken

6. Regent of Kendal, Central Java, Hendy Boedoro, convicted

7. Regent of Pemalang, Central Java, M Machroes, status information taken

8. The Regent of Semarang, Central Java, Bambang Guritno, is on trial

9. Regent of Wonogiri, Central Java, Begug Purnomosidi, status information taken

10. Regent of Madiun, East Java, H Djunaedi Mahendra, suspect status

11. Regent of Magetan, East Java, Saleh Muljono, suspect status

12. Regent of Malang, East Java, Personal Prostration, status information taken

13. Regent of Pamekasan, East Java, Achmad Syafii Yasin, status information taken

14. Regent of Pasuruan, East Java, H. Jusbakir Aldjufri, status information taken

15. Regent of Sidoarjo, East Java, Wien Hendrarso, status information taken

16. Regent of Situbondo, East Java, Ismunarso, suspect status

17. Regent of Ketapang, West Kalimantan, Morkes Effendi, status information taken

18. Regent of Sintang, West Kalimantan, Milton Crosby, status information taken

19. Regent of Tanah Laut, South Kalimantan, Ardiansyah, suspect status

20. Regent of Barito Selatan, Central Kalimantan, Baharudin H Lisa, status information taken

21. Regent of North Barito, Central Kalimantan, Achmad Yuliansyah, suspect status

22. Regent of Lamandau Bustani, Central Kalimantan, Hj Mahmud, suspect status

23. The Regent of Kutai Kartanegara, East Kalimantan, Syaukani HR, is on trial

24. Regent of Penajam Paser Utara, East Kalimantan, Yusran Aspar, suspect status

25. Regent of Tulang Bawang, Lampung, Abdurachman Sarbini, information taken

26. Regent of Dompu, West Nusa Tenggara, Abu Bakar Ahmad, convicted

27. Regent of West Lombok, West Nusa Tenggara, Iskandar, status information taken

28. Regent of Kupang, East Nusa Tenggara, Ibrahim Agustinus Medah, suspect status

29. Regent of Rote Ndao, East Nusa Tenggara, Christian Nehemia Dillak, suspect status

30. Regent of South Central Timor, East Nusa Tenggara, Daniel Banunaeak, status information taken
31. Regent of Jayawijaya, Papua, David Agustein Hubi, suspect status
32. Regent of Nabire, Papua, Drs Anselmus Petrus Youw, suspect status
33. Regent of Pelalawan, Riau, Tengku Azmun Jaafar, suspect status
34. Regent of Mamasa, West Sulawesi, HM Said Saggaf, information taken
35. Regent of Luwu, South Sulawesi, Basmin Mattayang, suspect status
36. Regent of Tana Toraja, South Sulawesi, Johanis Amping Situru, suspect status
37. Regent of Morowali, Central Sulawesi, Andi Muhammad AB, suspect status
38. Regent of Muaraenim, South Sumatra, Kalamudin Djinab, status information taken
39. Regent of Ogan Komering Ulu Selatan, South Sumatra, Muhtadin Serai, suspect status
40. Regent of Nias, North Sumatra, Bina B Bahaiak, suspect status
41. Regent of Sleman, Yogyakarta, Ibnu Subiyanto, witness status (previously written as suspect-Ed). North Sumatra, Bina B Bahaiak, suspect status
