# Supplementary material for: Democratization, leader education and growth: firm-level evidence from Indonesia
Source: Springer Nature journal article supplement (doi:10.1007/s10887-022-09221-5), 2023-02-15
Supplement: MOESM2 [file ICW 2008.pdf › Data/Mayor-level corruption dataset (incl sources)/ICW 2008.pdf]

# Independent Report

Corruption Assessment and Compliance United Nation  
Convention Against Corruption (UNCAC)-2003 in  
Indonesian Law

By:  
**Indonesia Corruption Watch (ICW)**

On behalf of:

BaKO Sumbar I FITRA Tuban I Forum Peduli Sumatera Barat (FPSB) I Indonesia  
Legal Resource Centre (ILRC) I Indonesian Court Monitoring (ICM) I Konsorsium  
Reformasi Hukum Nasional (KRHN) I Lembaga Bantuan Hukum (LBH) Jakarta I  
Lembaga Bantuan Hukum (LBH) Surabaya I Lembaga Bantuan Hukum (LBH)  
Padang I Lembaga Kajian dan Advokasi untuk Independensi Peradilan (LeIP) I  
Lembaga Studi dan Advokasi Anti Korupsi (SANKSi) Borneo I Lembaga Pusat Studi  
Hak Asasi Manusia (LPSHAM) Palu I Masyarakat Pemantau Peradilan Indonesia  
(MaPPI) Fakultas Hukum Universitas Indonesia I Pengembangan Inisiatip dan  
Advokasi Rakyat Nusa Tenggara Timur (PIAR– NTT) I Pusat Kajian Anti Korupsi  
(PuKAt) Fakultas Hukum Universitas Gadjah Mada I Pusat Studi Hukum dan  
Kebijakan (PSHK) I Pusat Studi Anti Korupsi (PaSAK-45) Universitas 45 Makasar I  
Pusat Studi Konstitusi (PUSaKO) Fakultas Hukum Universitas Andalas I  
Transparency International (TI) Indonesia

Partner:  
KEMITRAAN – The Partnership for Governance Reform (PGR)

Anti-corruption Public Forum of UNCAC  
24<sup>th</sup> – 26<sup>th</sup> January 2008  
and  
2<sup>nd</sup> Confrence of State Party (CoSP) Nusa Dua-Bali,  
28<sup>th</sup> January – 1<sup>st</sup> February 2008

### **Editor Ahli**

1. Teten Masduki
2. Dadang Trisasongko
3. Bambang Widjojanto

### **Disusun oleh:**

- |                 |                          |
|-----------------|--------------------------|
| Penulis :       | 1. Febri Diansyah        |
|                 | 2. Illian Deta Arta Sari |
| Analisis Data : | 1. Febri Hendri          |
|                 | 2. Firdaus Ilyas         |
|                 | 3. Lais Abid             |

# Daftar Isi

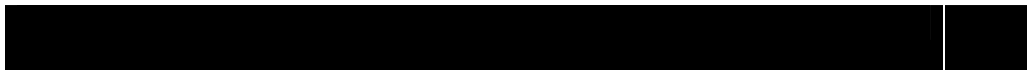

## Bab I

### **Pengantar**

- |    |                                      |  |
|----|--------------------------------------|--|
| A. | Latar Belakang                       |  |
| B. | Posisi Laporan Independen Masyarakat |  |
| C. | Metode penyusunan Laporan            |  |
| D. | Keterbatasan dan Sistematika Laporan |  |

## Bab II

### **Level Korupsi Indonesia**

- |    |                                          |  |
|----|------------------------------------------|--|
| A. | Keadaan Korupsi Indonesia                |  |
| B. | Korupsi Besar yang Belum terselesaikan   |  |
| C. | Buruknya Kinerja Institusi Penegak Hukum |  |

## Bab III

### **Program dan kebijakan Anti Korupsi Indonesia**

- |    |                                                    |  |
|----|----------------------------------------------------|--|
| A. | Evaluasi terhadap NACPs Framework Indonesia        |  |
| B. | Delegitimasi Institusi Pemberantasan Korupsi       |  |
| C. | Pengaruh Lembaga Donor dalam Pembentukan Kebijakan |  |

## Bab IV

### **Pemenuhan UNCAC pada Hukum Indonesia**

## Bab V

### **Kesimpulan dan Rekomendasi**

### **Lampiran**

# Bab I

## Pengantar

*"Corruption hurts the poor disproportionately by diverting funds intended for development, undermining a government's ability to provide basic services, feeding inequality and injustice, and discouraging foreign investment and aid"*

**Kofi Annan<sup>1</sup>**

### A. Latar Belakang

Resolusi 58/4 tanggal 31 Oktober 2003, Majelis Umum PBB akhirnya menerima *United Nation Convention Against Corruption* (UNCAC), yang disahkan melalui Konferensi Tingkat Tinggi tanggal 9-11 Desember 2003 di Merida, Mexico berdasarkan Resolusi nomor 57/169. *United Nation Office on Drugs and Crime* (UNODC) mencatat, 140 negara pihak telah menandatangani konvensi, dan 103 diantaranya telah meratifikasi pada hukum positif yang berlaku di masing-masing negara pihak<sup>2</sup>.

Kelahiran UNCAC tidak dapat dipisahkan dari kecemasan dunia Internasional terhadap efek dan potensi negatif korupsi. Seperti yang diungkapkan Mantan Sekretaris Jenderal PBB, Kofi Annan, korupsi telah melukai dan menyakiti kaum miskin melalui ketidak-proporsionalan/ketimpangan alokasi pendanaan, menurunkan kemampuan pemerintah untuk melakukan pelayanan mendasar terhadap warga negaranya, menimbulkan ketidakseimbangan dan ketidakadilan, serta berpengaruh buruk terhadap investasi dan dana bantuan luar negeri.

Dalam kacamata global, selain menghambat investasi, korupsi itu sendiri adalah hambatan terbesar untuk merealisasikan keseimbangan pendapatan, kesejahteraan, akses pendidikan bahkan pemberantasan kemiskinan. Salah satu faktor terpenting adalah saat arus uang dan pola-pola korupsi ternyata telah menembus sekat-sekat kedaulatan negara. Hal ini menjadi masalah krusial jika di masing-masing negara terdapat standar hukum yang berbeda, bahkan seringkali bertolak belakang dalam hal perlawanan terhadap korupsi. Bukan tidak mungkin sebuah perbuatan yang di satu negara diklasifikasikan sebagai tindak pidana korupsi, ternyata dinilai sebaliknya di negara lain.

Dalam posisi Indonesia sebagai salah satu negara pihak UNCAC, Indonesia terikat dengan konvensi, tepatnya sejak 19 September 2006 ketika Indonesia meratifikasi UNCAC melalui Undang-Undang Nomor 7 tahun 2006 (UU 7/2006) tentang Pengesahan *United Nations Convention Against Corruption*, 2003. Meskipun secara tegas mereservasi Pasal 66 ayat (2)<sup>3</sup>, penandatanganan dan

---

<sup>1</sup> United Nations Secretary-General in his statement on the adoption by the General Assembly of the United Nations Convention against Corruption.

(<http://www.unodc.org/unodc/en/corruption.html>)

<sup>2</sup> [http://www.unodc.org/unodc/crime\\_signatures\\_corruption.html](http://www.unodc.org/unodc/crime_signatures_corruption.html), Diakses pukul 13.45, 02 November 2007.

Sesuai dengan Pasal 68 ayat (1) konvensi, UNCAC dianggap berlaku pada hari ke-90 setelah tanggal penyimpanan instrumen ke-30 ratifikasi, penerimaan, persetujuan, atau tepatnya pada tanggal 14 Desember 2005.

<sup>3</sup> Pasal 66 ayat (2) mengatur tentang penyelesaian perselisihan antara negara pihak yang tidak dapat diselesaikan melalui jalur negosiasi. Menurut ketentuan ini, sengketa negara pihak mengenai penafsiran atau penerapan konvensi

ratifikasi sekaligus adalah penegasan Indonesia sebagai bagian dari kerjasama Internasional dalam perlawanan terhadap korupsi.

Kerjasama tersebut dikongkritkan negara pihak melalui penyelenggaraan konferensi (CoSP, *Confrence of States Party*). Sesuai dengan Pasal 63 ayat (1), konferensi diselenggarakan untuk meningkatkan kapasitas dan kerjasama negara-negara peserta demi pencapaian tujuan dan sasaran UNCAC. Seperti diketahui, [konferensi pertama](#) telah dilaksanakan di Jordan-Dead Sea, 10 to 14 December 2006.

Pertemuan tersebut pada akhirnya menghasilkan delapan resolusi dan satu keputusan. Keputusan yang dihasilkan adalah posisi Indonesia sebagai tuan rumah penyelenggaraan konferensi kedua (2<sup>nd</sup> CoSP). Sedangkan, resolusi berbicara tentang (1) *Review of implementation*; (2) *Information-gathering mechanism on the implementation of the United Nations Convention against Corruption*, (3) *Appeal to States parties and invitation to signatories to the United Nations Convention against Corruption to adapt their legislation and regulations*; (4) *Establishment of an intergovernmental working group on asset recovery*; (5) *Technical assistance*; (6) *International cooperation workshop on technical assistance for the implementation of the United Nations Convention Against Corruption*; (7) *Consideration of bribery of officials of public international organizations*; dan, (8) *Best practices in the fight against corruption*<sup>4</sup>.

Atas dasar itulah setiap negara peserta konferensi harus menjalankan secara maksimal setiap resolusi dan keputusan yang dihasilkan. Salah satu bagian prinsipil yang menjadi kewajiban Indonesia sebagai negara peserta adalah upaya *review of implementation* serta kontinuitas harmonisasi peraturan perundang-undangan yang disesuaikan dengan standar umum pada UNCAC. Dengan catatan, hal ini tidak menghilangkan tanggungjawab Indonesia untuk melaksanakan 7 resolusi lainnya.

## **B. Posisi Laporan Independen Masyarakat**

Pada dasarnya peran negara peserta dalam perlawanan terhadap korupsi di dunia juga tidak dapat dilepaskan dari peran kekuatan masyarakat sipil (*civil society*), terutama dalam bentuk partisipasi CSOs/NGOs. Karena sinergisitas dua elemen tersebut diharapkan dapat memaksimalkan upaya bersama membersihkan negara-negara dunia dari korupsi. Bahkan untuk memperkuat koordinasi gerakan anti korupsi tingkat Internasional, terminologi *interagency coordination* diadopsi dan disebutkan secara jelas sebagai konsep dari *International Group for Anti-Corruption Coordination* (IGAC)<sup>5</sup>.

Selain dinilai unik dibanding dengan konferensi Internasional lainnya, pelibatan aktif CSOs/NGOs ditegaskan pada Pasal 13 UNCAC. Menurut pasal ini, partisipasi akan terwujud dalam tindakan peningkatan transparansi dan kontribusi publik dalam proses pembuatan keputusan; akses informasi yang efektif; internalisasi nilai pada kurikulum

Dasar Hukum peran serta masyarakat adalah Pasal 13 UNCAC.

CSOs/NGOs di Indonesia secara rutin melakukan pengawasan dan pengawalan pemberantasan korupsi.

wajib diajukan pada Mahkamah Internasional (International Court of Justice) dengan permohonan sesuai dengan statuta pengadilan.

Lihat: Pasal 66 ayat (2) United nation Convention Against Corruption, 2003.

<sup>4</sup> Lebih jelas lihat: [http://www.unodc.org/unodc/caccosp\\_2006\\_resolutions\\_1.html](http://www.unodc.org/unodc/caccosp_2006_resolutions_1.html)

<sup>5</sup> [http://www.unodc.org/unodc/en/corruption\\_Interagency.html](http://www.unodc.org/unodc/en/corruption_Interagency.html)

pendidikan sekolah; serta pengakuan dan perlindungan terhadap kebebasan untuk mencari, mendapatkan, menerbitkan dan menyebarkan informasi tentang korupsi<sup>6</sup>.

Salah satu wujud kongkrit peran serta CSOs/NGOs adalah koordinasi pada level nasional sesuai dengan spesifikasi masing-masing untuk melakukan investigasi, monitoring dan analisis kebijakan yang berhubungan dengan perlawanan terhadap korupsi di Indonesia. Selain itu, CSOs/NGOs secara terus menerus melakukan pengawasan terhadap insitusi penegak hukum serta output yang berhubungan dengan korupsi. Hasil koordinasi tersebut dituangkan dalam bentuk laporan independen.

### C. Metode Penyusunan Laporan

Laporan Independen ini disusun melalui peran aktif kekuatan masyarakat sipil (*civil society*), terutama dalam bentuk partisipasi CSOs/NGOs anti korupsi dari berbagai daerah di Indonesia. Proses penyusunan dilakukan melalui pengumpulan data dan informasi dari berbagai sumber, baik secara langsung ataupun melalui studi literatur. Hasil kajian awal didiskusikan pada forum CSOs/NGOs tingkat nasional, dikritisi dan disosialisasikan ke empat daerah terpilih untuk mendapat masukan tambahan, hingga disusun ulang oleh tim penulis bersama editor. Laporan ini ditulis oleh Tim dari Indonesia Corruption Watch (ICW) dengan dukungan penuh CSOs/NGOs di Indonesia bersama KEMITRAAN/*Partnership for Governance Reform* (PGR).

### D. Keterbatasan dan Sistematika Laporan

Laporan ini pada dasarnya menilai perkembangan keadaan korupsi, memilih analisa pada kasus-kasus korupsi besar yang tidak efektif tertangani, dan studi kritis kebijakan pemerintah dalam pemberantasan korupsi. Poin tersebut ditulis secara umum dengan penekanan tertentu. Sedangkan kebutuhan cata-cata yang lebih detail dicantumkan dalam lampiran yang disertakan bersamaan dengan laporan independen.

Laporan ini merupakan gabungan perspektif CSOs seluruh Indonesia yang secara mandiri menyusun laporan pembandingan. Substansi laporan ditekankan pada aspek penegakan hukum dan pemberantasan korupsi seperti yang diatur pada Bab III, UNCAC. Di sini secara kritis akan dilihat, apakah regulasi, kebijakan, dan komitmen politik (*political will*) pemerintah cukup efektif menekan laju korupsi dan tingginya korupsi di Indonesia. Dan, pada akhirnya dapat dipahami sejauh mana *national anti-corruption policies and programs* (NACPs) benar-benar diciptakan dan diterapkan untuk memberantas korupsi. Karena hal ini berhubungan dengan kekhawatiran, bahwa gerakan pemberantasan korupsi di Indonesia tidak lebih dikondisikan hanya menyentuh kulit luar persoalan, demi kepentingan publisitas, dan citra politis.

Selain itu, akan diteliti tingkat pemenuhan Hukum Indonesia pada pasal-pasal Bab III UNCAC. Basis data yang digunakan adalah *Gap Analysis* yang telah disusun Komisi Pemberantasan Korupsi (KPK). Melalui tinjauan kritis isi UNCAC dihubungkan dengan rekomendasi *Gap Analysis*, dapat dilihat apakah bagian tertentu relevan atau tidak sama sekali diterapkan di Hukum Indonesia. Jika relevan, maka dicermati lagi sejauh mana pemerintah Indonesia telah berupaya melakukan harmonisasi perundang-undangan yang sesuai dengan substansi dan amanat UNCAC.

---

<sup>6</sup> Pasal. 13 ayat (1), United Nation Convention Against Corruption, 2003.

Dua substansi kajian diatas penting diposisikan sebagai perspektif alternatif bagi negara pihak (*states party*) konvensi untuk melakukan penilaian dan mendapatkan pemahaman yang realistis tentang kondisi pemberantasan korupsi di Indonesia.

Dengan kata lain, pilihan fokus penulisan "pemberantasan korupsi" untuk laporan independen yang akan disampaikan pada 2<sup>nd</sup> CoSP di Nusa Dua-Bali, 28 Januari – 01 Februari 2008 diharapkan menjadi sumbangan berharga dalam kerangka perlawanan korupsi secara global. Karena bagaimana pun juga, kerjasama internasional hanya akan terlaksana secara efektif jika sistem internal antikorupsi di tingkat nasional berjalan dengan baik.

\* \* \*

## Bab II

# Level Korupsi Indonesia

Meskipun dalam sepuluh tahun terakhir telah banyak upaya pemerintah Indonesia dan masyarakat dengan bantuan lembaga donor asing untuk melawan korupsi, namun nampak kemajuannya dirasakan masyarakat sangat lamban. Praktek suap masih menjadi pemandangan utama kegiatan sehari-hari di birokrasi, pengadilan dan parlemen, yang dengan mudah hal itu dapat diketahui masyarakat berkat berkah kebebasan pers dan bicara yang sangat luar biasa sejak Indonesia memasuki era demokrasi. Apalagi kalau keberhasilan korupsi diukur dari perbaikan kesejahteraan sosial dan ekonomi masyarakat. Investasi asing juga diakui oleh pemerintah masih enggan masuk ke sini

### A. Keadaan Korupsi Indonesia

Dalam lima tahun terakhir Indonesia masih menempati kelompok negara-negara terkorup di dunia. Corruption Perception Index (CPI) dalam lima tahun terakhir skornya hanya naik 0.5 dari 1,9 (2001) ke 2.4 (2006) dan turun kembali 0,1 poin menjadi 2.3 (2007)<sup>7</sup>.

Indonesian CPI Trend 2004-2007

| Tahun | Rangking Indonesia | CPI | Jarak Tingkat Kepercayaan |
|-------|--------------------|-----|---------------------------|
| 2005  | 137 dari 158       | 2.2 | 2.1 – 2.5                 |
| 2006  | 130 dari 163       | 2.4 | 2.2 – 2.6                 |
| 2007  | 143 dari 179       | 2.3 | 2.1 – 2.4                 |

Sumber: Diolah dari CPI-Transparency International

Sementara *Governance Assessment Survey* (2007) PSKK Universitas Gadjah Mada dan *the Partnership for Governance Reform* (PGR) di 10 propinsi dan 10 kabupaten, salah satunya menyimpulkan pungli masih lazim dan pemberantasan korupsi terhambat keseriusan pemerintah dan lembaga bukan pemerintah<sup>8</sup>.

#### DEFINISI KORUPSI:

UU 31 tahun 1999 jo UU No20/2001 tentang Pemberantasan Korupsi Indonesia mengelompokkan korupsi atas tujuh bagian. Terdiri dari 7 bagian besar (30 bentuk), yaitu:

1. Kerugian Keuangan Negara,
2. Suap-Menyuap,
3. Penggelapan dalam jabatan,
4. Pemerasan,
5. Perbuatan curang,
6. Benturan kepentingan dalam pengadaan,
7. Gratifikasi.

<sup>7</sup> Tabel lengkap dapat diakses di:

[http://www.transparency.org/news\\_room/in\\_focus/2007/cpi2007/cpi\\_2007\\_table](http://www.transparency.org/news_room/in_focus/2007/cpi2007/cpi_2007_table)

<sup>8</sup> <http://www.kemitraan.or.id/governance-center/governance-report/launching-governance-assesment-2006/>



Hasil audit BPK juga memperlihatkan keadaan yang sama, dari tahun ketahun penyimpangan keuangan dan administrasi cenderung meningkat.yang menunjukkan rendahnya kemauan pemerintah memperbaiki diri. Terhitung sampai dengan tahun 2007, dari laporan audit BPK-RI terdapat 36.009 temuan pemeriksaan dengan nilai kerugian Rp.3.657, 71 triliun. 77,56% dari temuan BPK tersebut hingga pertengahan tahun 2007 belum ditindaklanjuti oleh masing-masing insitusi bermasalah<sup>9</sup>.

Sebagian dari penyimpangan diatas, mengakibatkan kerugian negara. Dari Grafik dibawah ini dapat dilihat, bahwa tahun 2007 terjadi peningkatan kerugian negara, setelah pada semester II tahun 2006 sempat mengalami penurunan signifikan.

**Perkembangan Indikasi Kerugian Negara Hasil Audit BPK,  
Semester I - 2005 s/d I - 2007 (miliar rupiah)**

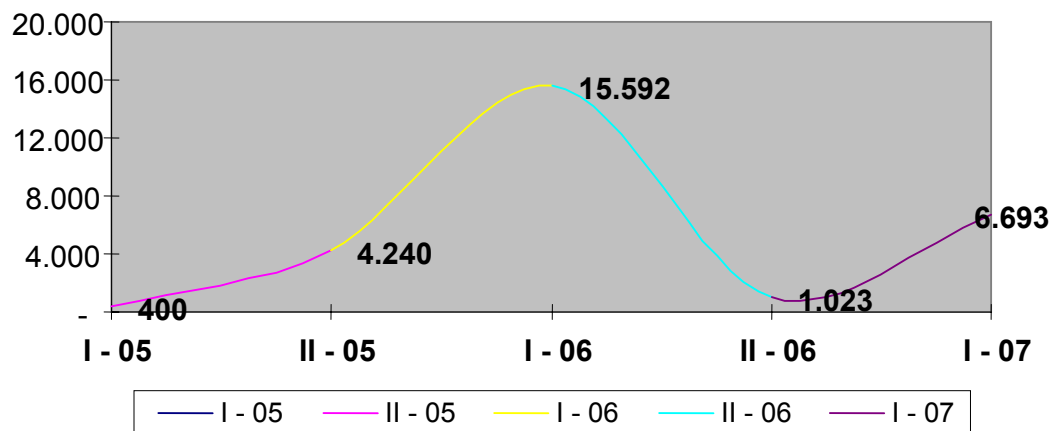

Sumber: Dokumen ICW, diolah dari Hasil pemeriksaan BPK 2005- semester I 2007

Dengan lebih detail, berdasarkan klasifikasi kerugian negara pada Anggaran Pendapatan dan belanja Negara (APBN), Badan Usaha Milik Negara (BUMN) dan Pemerintahan Daerah (PEMDA), kerugian terbanyak yang pernah terjadi selama tahun 2005 sampai dengan semester I 2007 berada pada pos BUMN.

<sup>9</sup> Badan Pemeriksa Keuangan RI, Ikhtisar Hasil Pemeriksaan Semester (IHPS) I Tahun 2007. Hal. 287.

### Indikasi Kerugian Negara Hasil Audit BPK berdasarkan Semester Pemeriksaan (jutaan rupiah)

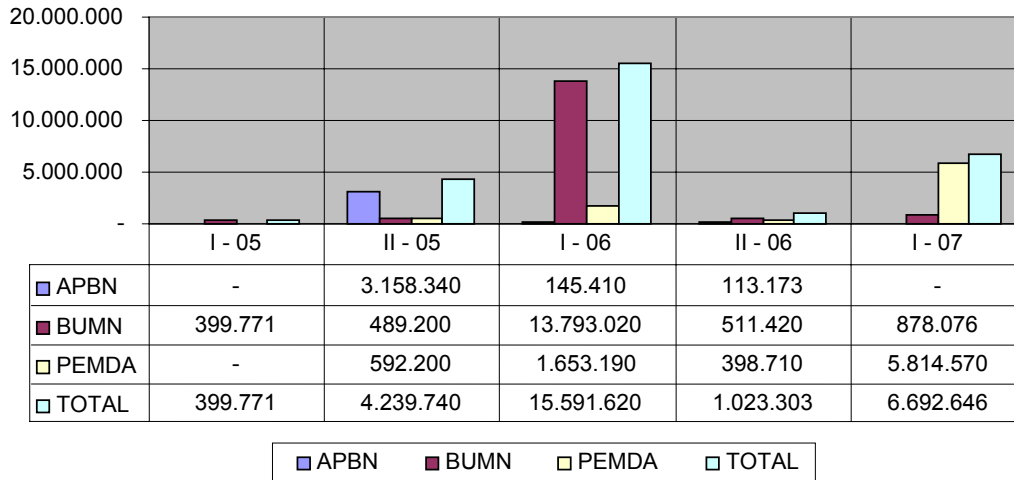

Sumber: Dokumen ICW, diolah dari Hasil pemeriksaan BPK 2005- semester I 2007

## B. Tipologi Korupsi

Sejak era demokrasi telah terjadi pergeseran korupsi dari korupsi yang memusat di istana ke korupsi yang lebih terfragmentasi, seiring dengan perubahan struktur politik dan sistem multipartai Pemilu 1999. Kebijakan desentralisasi pemerintahan sejak tahun 2000 juga telah mendorong menyebarnya korupsi di tingkat daerah. Selain tersebar di berbagai daerah, korupsi juga menjalar pada institusi penegak hukum.

Penelitian yang dilakukan *Global Corruption Barometer* (GCB) TII 2005-2007 menempatkan kepolisian, parlemen, partai politik dan lembaga peradilan dalam daftar teratas institusi yang paling korup.

### Peringkat Institusi Terkorup di Indonesia

| Peringkat Terkorup | Th. 2005       |      | Th. 2006       |      | Th. 2007       |      |
|--------------------|----------------|------|----------------|------|----------------|------|
|                    | Instansi       | Skor | Instansi       | Skor | Instansi       | Skor |
| I                  | Partai Politik | 4,2  | Parlemen       | 4,2  | Polisi         | 4,2  |
| II                 | Parlemen       | 4,0  | Polisi         | 4,2  | Parlemen       | 4,1  |
| III                | Polisi         | 4,0  | Pengadilan     | 4,2  | Pengadilan     | 4,1  |
| IV                 | Pengadilan     | 3,8  | Partai Politik | 4,1  | Partai Politik | 4,0  |

Sumber: Diolah dari *Global Corruption Barometer* (GCB)-TI Indonesia

Empat institusi yang seharusnya berperan besar dalam agenda antikorupsi justru menunjukkan catatan yang buruk. Tiga tahun berturut-turut, empat posisi terkorup tetap dipegang oleh Kepolisian, Parlemen, Partai Politik dan Pengadilan.

Tindakan koruptif parlemen dan partai politik sebagai institusi terkorup juga terlihat pada proses legislasi undang-undang pemilihan umum dan partai politik yang mengarah pada sikap anti

akuntabilitas dan anti tranparansi. Undang-undang partai politik yang sedang disusun hingga proses terakhir 6 Desember 2007 bahkan menegaskan sikap tertutupan partai yang tidak mempunyai kewajiban melakukan pertanggungjawaban keuangan pada publik.

*Partnership for Governance Reform (PGR)* bersama Universitas Gadjah Mada (UGM) pun mencatat hal yang sama. Dari hasil survey terhadap pejabat publik, pengusaha dan kelompok masyarakat lainnya, Kepolisian, Kejaksaan dan Pengadilan menempati urutan dengan intensitas korupsi tertinggi..

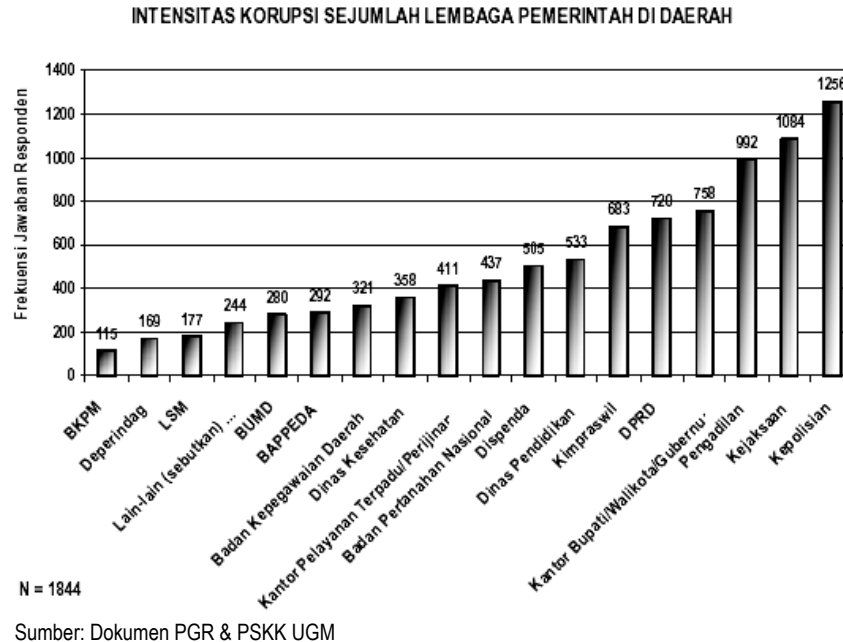

Sementara temuan BPK pada empat institusi primer penegak hukum di Indonesia memperlihatkan tingkat penyimpangan yang mengkhawatirkan. Kepolisian tetap menduduki peringkat tertinggi dengan temuan penyimpangan anggaran di tahun 2007, yakni 303 temuan, disusul oleh Kejaksaan Agung dan Mahkamah Agung,

**Temuan Hasil Pemeriksaan BPK tahun 2007**

| No | Insitusi/Lembaga                      | Temuan Pemeriksaan |               | Belum Ditindaklanjuti |               |
|----|---------------------------------------|--------------------|---------------|-----------------------|---------------|
|    |                                       | Jml                | Nilai         | Jml                   | Nilai         |
| 1. | Kejaksaan Agung                       | 108                | 8.759,851     | 84                    | 8.377,849     |
| 2. | Kepolisian Republik Indonesia (POLRI) | 303                | 533,970       | 303                   | 533,970       |
|    |                                       |                    | US\$ 1.349,34 |                       | US\$ 1.349,34 |
|    |                                       |                    | € 927,69      |                       | € 927,69      |
| 3. | Mahkamah Agung                        | 24                 | 5,815         | 15                    | 5,815         |
| 4. | Komisi Pemberantasan Korupsi          | 9                  | 0.00          | 1                     | 0.00          |

Sumber: Ikhtisar Hasil Pemeriksaan BPK-RI Semester I Tahun 2007. Hal. 286

Hal diatas berkorelasi dengan karakter kasus korupsi yang ditangani aparat penegak hukum. Indonesia Corruption Watch (ICW) mencatat, bahwa kasus yang ditangani dari tahun 2004-2007 hanya dalam kategori korupsi konvensional, yaitu sektor pengadaan barang/jasa. Tabel dibawah menjelaskan tren modus 4 tahun terakhir. Setidaknya di tahun 2006 dan 2007, mark-up, adalah modus yang paling dominan dari keseluruhan kasus korupsi yang dapat diungkap penegak hukum.

#### Modus Kasus Korupsi yang Terungkap 2004-2007

| No.                                        | Modus                                            | Tahun Pengungkapan |              |               |              |
|--------------------------------------------|--------------------------------------------------|--------------------|--------------|---------------|--------------|
|                                            |                                                  | 2004               | 2005         | 2006          | 2007         |
| 1                                          | Mark up                                          | 22                 | 36           | 60            | 27           |
| 2                                          | Penyimpangan Anggaran                            | 91                 | 64           | 31            | 23           |
| 3                                          | Penggelapan/Penyunatan                           | 23                 | 8            | 30            | 4            |
| 4                                          | Manipulasi                                       | 2                  | 4            | 12            | 1            |
| 5                                          | Mark down                                        | 1                  | 2            | 9             | 4            |
| 6                                          | Penyuapan                                        | 8                  | 5            | 8             | 3            |
| 7                                          | Proyek/kegiatan fiktif                           | 3                  | 2            | 7             | 8            |
| 8                                          | Pemerasan/Pungli                                 | 3                  | -            | 5             | 8            |
| 9                                          | Penyalahgunaan fasilitas Kredit dan kredit macet | -                  | 2            | 4             | 1            |
| 10                                         | Penyalahgunaan izin/wewenang                     | -                  | 2            | -             | 3            |
| <b>Total Kasus Terungkap</b>               |                                                  | <b>153</b>         | <b>125</b>   | <b>166</b>    | <b>82</b>    |
| <b>Kerugian Negara (dalam Rp. Triliun)</b> |                                                  | <b>4,273</b>       | <b>5,305</b> | <b>14,360</b> | <b>1,413</b> |

Sumber: Indonesia Corruption Watch (ICW)

#### Aktor Korupsi

Berdasarkan data Pusat Studi Anti (PuKAt) Korupsi Fakultas Hukum UGM, aktor terbanyak tahun 2007 adalah Bupati/Walikota. Menurut PuKAt, hal ini menunjukkan pengaruh kuat desentralisasi terhadap peningkatan potensi dan kesempatan korupsi.

Berbeda dengan hasil penelitian diatas, ICW mencoba mengklasifikasikan lebih rinci. Dari 175 tersangka yang diungkap di tahun 2007, tercatat hanya 1,14 % yang berada di level Top. Sebagian besar upaya pemberantasan hanya menyentuh klasifikasi aktor di tingkat bawah (60,6 %).

#### Klasifikasi Aktor Tersangka Korupsi tahun 2007

| Klasifikasi Aktor | Jabatan                                                                                                                                                                   | Jumlah Tersangka | Persentase Pengungkapan |
|-------------------|---------------------------------------------------------------------------------------------------------------------------------------------------------------------------|------------------|-------------------------|
| Top               | Menteri (Mantan)                                                                                                                                                          | 2                | 1,14 %                  |
| Midle             | Gubernur, Walikota, Bupati, Anggota DPRD, Anggota Komisioner di daerah, Direksi BUMN & BUMD, Dirjen, Direktorat Polda, Ketua Pengadilan Negeri, Pimpinan Proyek Propinsi. | 67               | 38,3 %                  |
| Bottom            | Kepala dinas, kepala cabang BUMD, Staf/karyawan Pemda, Staf BUMN/BUMD, Staf DPRD, pengurus ormas, rekanan,                                                                | 108              | 60,6 %                  |
| <b>TOTAL</b>      |                                                                                                                                                                           | <b>175</b>       | <b>100 %</b>            |

Sumber: Indonesia Corruption Watch, 2008

Tabel diatas semakin jelas memperlihatkan disorientasi pemberantasan korupsi yang dilakukan pemerintah Indonesia, sehingga sulit mengharapkan adanya efek jera terhadap pelaku korupsi.

Dari perspektif sektor dapat diketahui, bahwa kerugian negara tertinggi diakibatkan oleh korupsi di sektor energi dan listrik (senilai Rp. 566 miliar), dan sektor perkebunan dan pertanahan di posisi kedua.

#### 10 Sektor Terkorup yang Terungkap Tahun 2007

| No. | Sektor                                    | Jumlah Kasus | Kerugian Negara (Rp miliar) |
|-----|-------------------------------------------|--------------|-----------------------------|
| 1.  | Energi & Listrik                          | 5            | 566.00                      |
| 2.  | Perkebunan/Pertanian/Peternakan           | 6            | 217.60                      |
| 3.  | Keuangan Daerah                           | 7            | 155.04                      |
| 4.  | Telekomunikasi                            | 4            | 99.27                       |
| 5.  | Perbankan                                 | 3            | 77.96                       |
| 6.  | Operasional Pemerintahan Pusat dan Daerah | 7            | 73.36                       |
| 7.  | Sosial Kemasyarakatan                     | 8            | 65.12                       |
| 8.  | Perdagangan                               | 2            | 32.45                       |
| 9.  | Pariwisata                                | 2            | 20.25                       |
| 10. | Operasional Sekretariat DPR/DPRD          | 5            | 19.40                       |
| 11. | Lain-lain                                 | 33           | 86,84                       |
|     | <b>Total</b>                              | <b>82</b>    | <b>1.413,29</b>             |

Sumber: *Indonesia Corruption Watch (ICW)*, Trend Pengungkapan Kasus Korupsi Tahun 2007

\* \* \*

## Bab III

# Program dan Kebijakan Anti Korupsi Indonesia

“Pemberantasan korupsi telah menimbulkan efek samping berupa  
ketakutan pejabat untuk membuat keputusan, sehingga perekonomian  
menjadi terganggu”

**Jusuf Kalla, Wakil Presiden RI**  
( *Tempo Interaktif*, 5 Desember 2006)

Mengapa korupsi terus terjadi dan cenderung meningkat dari tahun-ke tahun? Padahal dalam lima tahun terakhir sudah banyak kebijakan, program dan instrumen antikorupsi global yang ditransplantasi di Indonesia. Program yang menghabiskan puluhan juta dolar US bantuan asing, dan dana dalam negeri. Sehingga, penting dilakukan sebuah studi kebijakan dan kelembagaan antikorupsi di Indonesia.

Berdasarkan catatan World Bank, indikator *Worldwide Governance Indicators* (WGI) memperlihatkan kecenderungan adanya peningkatan kontrol terhadap korupsi di Indonesia dari tahun 2002 sampai 2006. Pada satu sisi pembacaan ini merupakan prestasi bagi agenda pemberantasan korupsi.

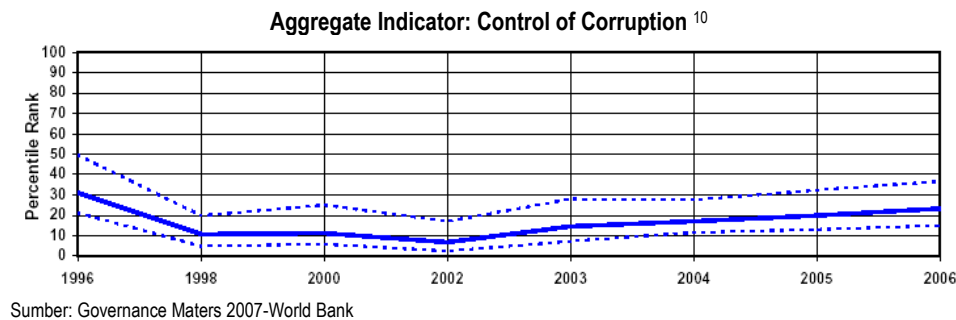

Akan tetapi, meskipun WGI memperlihatkan peningkatan, harus dicermati, hal ini lebih disebabkan oleh faktor kebebasan pers sehingga publik dapat secara intens mengawal proses pemberantasan korupsi. Dengan kata lain, aspek ini justru memperlihatkan posisi pemerintah yang tidak dominan berperan dalam agenda antikorupsi di Indonesia.

### A. Evaluasi NACPs

Salah satu *National Anticorruption Policies and Programs* (NACPs) prinsip yang disusun pemerintah Indonesia dituangkan dalam dokumen Instruksi Presiden Nomor 5 Tahun 2004 (Inpres 5/2004) tentang Percepatan Pemberantasan Korupsi serta Draft Rencana Aksi Nasional Pemberantasan

<sup>10</sup> <http://info.worldbank.org/governance/wgi2007/pdf/c102.pdf>

Korupsi 2004-2007 (RAN-PK). Dokumen ini terdiri dari tiga elemen, seperti dilihat pada tabel dibawah.

### Elemen Rancangan Aksi Nasional Pemberantasan Korupsi (RAN-PK)

|                                   |    |                                                                                                                                                                     |
|-----------------------------------|----|---------------------------------------------------------------------------------------------------------------------------------------------------------------------|
| <b>A. PENCEGAHAN</b>              | 1. | Penyempurnaan Sistem Pelayanan Publik                                                                                                                               |
|                                   | 2. | Peningkatan Kinerja Layanan Pemerintahan                                                                                                                            |
|                                   | 3. | Peningkatan Kinerja Lembaga Pelayanan Publik                                                                                                                        |
|                                   | 4. | Peningkatan Pengawasan atas Pelayanan pemerintahan                                                                                                                  |
|                                   | 5. | Penyempurnaan Sistem Manajemen Keuangan negara                                                                                                                      |
|                                   | 6. | Penyempurnaan Sistem Pengadaan Barang dan Jasa Pemerintah                                                                                                           |
|                                   | 7. | Penyempurnaan Sistem Manajemen Sumber Daya Manusia dan Pembinaan Aparatur Negara                                                                                    |
|                                   | 8. | Peningkatan Kesadaran dan Partisipasi Masyarakat                                                                                                                    |
| <b>B. REPRESI</b>                 | 1. | Mempercepat Penanganan dan Eksekusi dari Tindak Pidana Korupsi                                                                                                      |
|                                   | a. | Menentukan sektor prioritas pemberantasan korupsi dan mengaplikasikan indikator kinerja atas penanganan kasus korupsi yang ada guna mempercepat proses penyelesaian |
|                                   | b. | Mendukung penambahan jumlah hakim ad hoc untuk Pengadilan Korupsi                                                                                                   |
|                                   | c. | Memperbaiki koordinasi antara Badan Audit Internal dan eksternal dengan badan penegak hukum                                                                         |
|                                   | 2. | Peningkatan Kapasitas Aparatur Penegak Hukum                                                                                                                        |
|                                   | a. | Menyediakan penelusuran harta, audit hukum, pelatihan akuntansi.audit forensik dan hubungan masyarakat                                                              |
|                                   | b. | Memperbaiki pengelolaan sistem pengawasan atas badan penegak hukum                                                                                                  |
| <b>C. PENGAWASAN DAN EVALUASI</b> | c. | Melanjutkan percepatan pembentukan Komisi Jaksa serta Komisi Polisi sebagai badan pengawas eksternal                                                                |
|                                   | 1. | Pembentukan sistem monitoring                                                                                                                                       |
|                                   | 2. | Pengumpulan informasi mengenai proses peradilan yang berkaitan dengan korupsi                                                                                       |
|                                   | 3. | Melaksanakan survei atas korupsi                                                                                                                                    |
|                                   | 4. | Melaksanakan pengawasan pelaksanaan RAN-PK yang berkaitan dengan perbaikan peraturan yang ada                                                                       |

Mengacu pada pandangan Vinay Bhartgava dan Emil Bolongaita (2004), terdapat dua faktor penting yang harus diperhatikan untuk penerapan instrumen global antikorupsi dalam NaCPs setiap negara, yaitu yaitu keadaan tipologi korupsi (korupsi politik dan birokrasi) dan kualitas tatakelola pemerintahan (*governance*).

Governance Asessemsent PGR-UGM (2007) dan Global Corruption Barometer TII (2007) memperlihatkan kualitas *governance* yang buruk (*poor to fair*) keadaan korupsi state capture type corruption dan korupsi administratif yang sama-sama tinggi derajatnya.. Dalam keadaan ini maka reformasi antikorupsi yang efektif harus dilakukan dari luar negara. Masyarakat madani dan sektor swasta harus dimobilisasi guna meningkatkan kebutuhan eksternal untuk mendorong perubahan (politik dan ekonomi). Alasannya jelas, dalam keadaan itu tidak mungkin ada kemauan untuk berubah dari dalam secara sukarela.

Dari studi NaCPs di empat negara, program antikorupsi dalam keadaan negara seperti ini yang signifikan untuk mendorong perubahan adalah *Economic Policy reform*, *reducing public sector size*, *rule of law* dan *empowering citizen participation and freedom of the press*, serta independensi lembaga peradilan.

Berdasarkan penelitian yang dipublikasikan oleh *Centre for Strategic and International Studies* (CSIS) dan *The United States-Indonesia Society* (USINDO) diungkapkan, bahwa RAN-PK bukanlah sebuah strategi karena tidak memiliki beberapa elemen prinsipil. Rancangan ini dinilai lemah dalam skala prioritas, rancu mengenai tenggat waktu dan kurang jelas menjabarkan persoalan insentif dan sanksi<sup>11</sup>. Bahkan, jika dicermati, RAN-PK ternyata tidak membahas beberapa sektor publik yang sangat rentan terhadap korupsi, seperti peradilan, pengawasan terhadap sektor finansial, partai politik dan parlemen, serta pengawasan terhadap pengadaan barang dan jasa militer dan bisnis yang dimiliki militer.

Sofyan Djalil, Menteri Komunikasi dan Informasi Periode 2004-2007 dan Menteri negara BUMN: **Menolak badan usaha milik negara (BUMN) dikategorikan sebagai Badan Publik yang bisa diaksews publik dalam RUU Kebebasan Informasi Publik.**

Selain itu, paradigma RAN PK juga tidak sejalan paradigma baru pemberantasan korupsi yang terdapat pada UNCAC yang dianut secara luas oleh negara-negara di dunia.

### Kinerja Penegakan Hukum

Penelitian *Corruption Trend Analysis* (CTA) yang dilakukan ICW menemukan kecenderungan penurunan pengungkapan kasus korupsi selama rentang waktu tahun 2004-2007. Selama periode 2004-2006 rata-rata kasus terungkap adalah 148 kasus per-tahun, sedangkan pada tahun 2007 jumlah kasus korupsi terungkap hanya 82 kasus. Berdasarkan catatan ICW, hanya 5 dari 82 kasus dengan waktu terjadi tahun 2007, sedangkan selebihnya adalah kasus tahun-tahun sebelumnya yang baru diungkap pada tahun 2007.

Jumlah ini sesungguhnya mencerminkan penurunan kualitas, kemampuan, atau bahkan komitmen penegak hukum untuk mengungkap kasus korupsi. Pengungkapan kasus korupsi di tahun 2007 ternyata tidak mencapai rata-rata jumlah kasus yang terungkap tahun-tahun sebelumnya. Atau, secara visual, penurunan penanganan kasus korupsi juga dapat dicermati dari Grafik dibawah ini:

---

<sup>11</sup> Soren Davidsen, Et. All, 2006, Menghentikan Korupsi di Indonesia 2004-2006; Sebuah survey tentang Berbagai Kebijakan dan pendekatan pada Tingkat Nasional, USINDO dan CSIS. Jakarta. Hal. 5 dan 51



### Trend Pengungkapan Kasus Korupsi Tahun 2004-2007

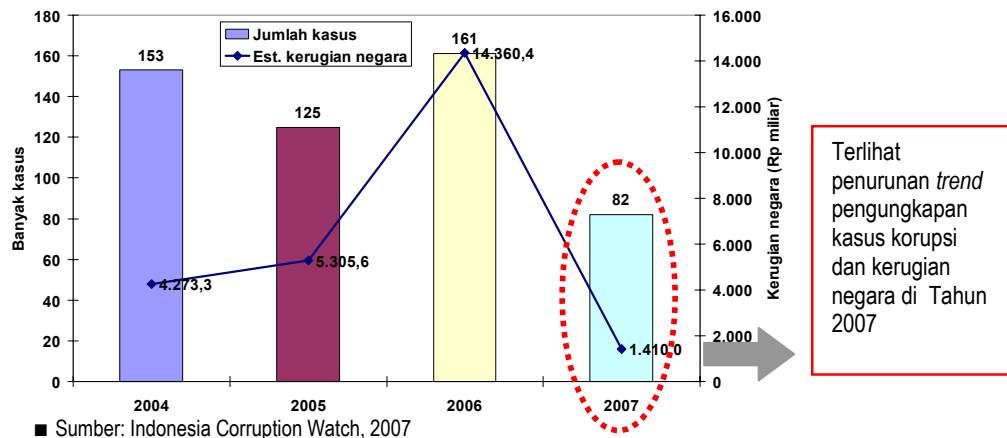

Selain penurunan jumlah kasus, tabel dan grafik diatas juga memperlihatkan penurunan penyelamatan kerugian negara. Dari 161 kasus korupsi yang terungkap pada tahun 2006 kerugian negara ditaksir mencapai Rp 14.36 triliun dan menurun dibandingkan dengan tahun 2007 yang hanya sekitar Rp 1,41 triliun atau turun sebesar 90% .

Padahal jika mencermati hasil [audit BPK](#)<sup>12</sup> untuk semester I Tahun 2007, mencatat kerugian negara mencapai Rp. 14 triliun. Apalagi kalau dialkulasi dari patokan kebocoran 30 % dari anggaran yang sudah diyakini kebenarannya oleh para ahli ekonomi dan Bank Dunia. Meskipun tidak semua temuan BPK merupakan indikasi tindak pidana korupsi, akan tetapi laporan detail jumlah kerugian negara di masing-masing institusi, BUMN/BUMD, dan pihak ketiga seharusnya menjadi batu pijakan awal penyelidikan dan penyidikan korupsi. Hal ini sekaligus menunjukan kurang-proaktifnya aparat penegak hukum untuk memproses lebih lanjut.

Penurunan jumlah kerugian negara yang berpotensi diselamatkan berbanding lurus dengan penurunan kinerja penegak hukum, Yakni:

**dari tahun 2006 ke 2007 turun lebih dari 90%.**

Seperti juga ditegaskan BPK, rendahnya tindak lanjut hasil pemeriksaan dan penyelesaian kerugian negara berhubungan dengan ketidak sungguh-sungguhan para pimpinan insitusi dan perusahaan negara/daerah, serta tidak adanya aturan yang bersifat memaksa. Dengan kata lain, pemerintah masih lalai dan tidak serius menyelesaikan penyimpangan anggaran dan mengembalikan kerugian negara.

Kembali pada pengungkapan kasus yang berhasil dipantau ICW, kecenderungan perulangan modus korupsi yang sana menunjukan tidak berjalannya mekanisme pencegahan dan reformasi internal di masing-masing institusi. Selain itu, gejala tersebut mengindikasikan penegak hukum yang tidak proaktif melakukan pemerataan gerakan pemberantasan korupsi di instansi lain.

Akan tetapi, 10 sektor korup berdasarkan jumlah kerugian negara yang terungkap penegak hukum, justru tidak berhasil menjerat sektor yang berkorelasi langsung dengan sasaran ideal pemberantasan korupsi. Dengan kata lain, sektor-sektor sensitif seperti peradilan, penanaman modal, kesehatan,

<sup>12</sup> lihat: Lampiran, Penyelesaian Temuan Kerugian Negara sampai dengan TA Semester I 2007

pendidikan, keimigrasian, pemilu/pilkada dan parpol, kehutanan dan tenaga kerja cenderung tidak tersentuh oleh penegak hukum.

Di Institusi Kejaksaan, alih-alih serius memberantas korupsi, beberapa kasus besar justru dihentikan tanpa alasan yang jelas, bahkan tidak jarang terkesan dipaksakan dan bertentangan dengan perundang-undangan. ICW mencatat setidaknya 10 kasus terbesar yang [dihentikan proses perkaranya](#)<sup>13</sup> oleh Kejaksaan kerap terjadi dalam kasus korupsi, termasuk yang melibatkan puteri mantan Presiden Soeharto.

Terdapat banyak fakta dan analisis yang bisa dikemukakan berhubungan dengan realitas kinerja institusi Kepolisian dan Kejaksaan dalam sebuah *frame work* gerakan anti korupsi di Indonesia.

*Pertama*, banyak kasus korupsi yang diendapkan/diambangkan. Berdasarkan data 15 Lembaga Pemantau Korupsi dari berbagai daerah tercatat bahwa selama kurun waktu 2004-2006, sedikitnya 246 kasus korupsi tidak jelas penanganannya. Ada kesan aparat Kepolisian dan Kejaksaan sengaja untuk menunda-nunda proses hukum tanpa ada batas akhir penyelesaian, khususnya yang melibatkan pejabat publik di daerah.

*Kedua*, penanganan perkara korupsi justru diwarnai praktek korupsi. Keluhan dari para mantan dan anggota DPRD yang menjadi tersangka korupsi APBD bahwa mereka kerap diperas oleh aparat Kejaksaan dan Kepolisian menegaskan bahwa praktek korupsi dalam pemberantasan korupsi ada. Kultur dan watak aparat penegak hukum yang tak segan-segan menggadaikan kasus untuk keuntungan pribadi mencerminkan bahwa reformasi hukum belum menyentuh pada kebijakan untuk melakukan pembersihan internal institusi penegak hukum secara serius.

*Keempat*, minimnya akses masyarakat untuk memperoleh laporan kemajuan penanganan perkara korupsi oleh Kejaksaan dan Kepolisian. *Kelima*, buruknya koordinasi antara Kejaksaan, Kepolisian dan KPK. Bolak-baliknya sebuah perkara korupsi dari Kepolisian ke Kejaksaan, dan demikian pula sebaliknya menunjukan buruknya mekanisme koordinasi diantara lembaga penyidik.

KPK pun sebagai lembaga yang memiliki kewenangan luar biasa tidak efektif menjalankan peran Koordinasi dan Supervisi terhadap kejaksaan dan kepolisian. Banyak kasus di daerah di daerah yang macet di Kejaksaan tidak diambil-alih KPK.

### 1. Komisi Pemberantasan Korupsi (KPK)

Kehadiran KPK dan Pengadilan Tipikor membawa angin segar bagi pemberantasan korupsi. yang berdiri sejak 2005. Hingga Juni 2007 KPK berhasil menuntaskan 59 kasus (2%) dari sekitar 6.213

#### Presiden RI, Susilo Bambang Yudhoyono cenderung memilih penyelesaian secara adat.

"Setidaknya ada 3 kasus yang diselesaikan secara adat selama tahun 2007, yakni kasus perseteruan antara Taufiquurrahman Ruki (Ketua KPK) dengan mantan Menteri Sekretaris Negara (Mensesneg), Yusril Ihza Mahendra, kasus konflik antara SBY dengan Amien Rais dan kasus perseteruan antara Mahkamah Agung (MA) dan Badan Pemeriksa Keuangan (BPK) terkait masalah audit biaya perkara di MA."

(sumber: Pusat Studi Anti Korupsi (PuKAt) FH UGM)

<sup>13</sup> Lampiran, Daftar Beberapa Perkara Korupsi yang Dihentikan Kejaksaan Agung

kasus korupsi dari 19901 kasus laporan masyarakat. Semuanya dijatuhi hukuman, tak ada yang bebas.

Meskipun demikian, banyak kritik yang disampaikan masyarakat pada KPK. *Pertama*, penanganan kasus korupsi masih dalam skala yang kecil dan sebagian besar berupa pengadaan barang dan jasa, *Kedua*, pilihan atas kasus korupsi tidak didasarkan atas nilai strategis untuk melahirkan *deterrence effect*, melainkan kemudahan dalam membongkarnya; *Ketiga* KPK belum mengefektifkan pendekatan pemeriksaan kekayaan pejabat untuk menyeret pejabat-pejabat yang korup ke pengadilan. Dua tabel dibawah ini akan menjelaskan tentang jenis kasus yang ditangani KPK dan tabulai perkara korupsi berdasarkan klasifikasi pelaku dari tahun 2002 sampai dengan Juni 2007.

**Wakil Presiden RI, Jusuf Kalla memanggil salah seorang pimpinan KPK ke kantor Partai Golkar yang dipimpinnya sehubungan dengan seringnya dilakukan pemanggilan terhadap kader Partai Golkar oleh KPK.**

*(Tempo, 28 Juni 2007)*

**Jenis Kasus yang Ditangani KPK  
(Tahun 2002-Juni 2007)**

| Jenis                   | Jumlah    | Persentase  |
|-------------------------|-----------|-------------|
| Pengadaan Barang/Jasa   | 33        | 56%         |
| Penyuapan               | 20        | 34%         |
| Penyalahgunaan Anggaran | 6         | 10%         |
| <b>TOTAL</b>            | <b>59</b> | <b>100%</b> |

Sumber: dokumen ICW

**Perkara Korupsi yang Ditangani KPK  
Berdasarkan Pelaku  
(Tahun 2002-Juni 2007)**

| Jabatan                                            | Jumlah Perkara |
|----------------------------------------------------|----------------|
| Mantan Menteri/Setingkat Menteri                   | 2              |
| Kepala Daerah                                      | 5              |
| Anggota Komisi dan Pejabat di Sekretariat Jenderal | 12             |
| Pengacara                                          | 2              |
| Karyawan Mahkamah Agung                            | 5              |
| Penegak Hukum                                      | 1              |
| Pejabat Eselon & Pimpinan Proyek                   | 22             |
| Swasta                                             | 10             |
| <b>TOTAL</b>                                       | <b>59</b>      |

Sumber: dokumen ICW

## 2. Kejaksaan

Kejaksaan sebagai ujung tombak pemberantasan korupsi pemerintahan SBY-Kalla, juga tidak menunjukkan hasil yang maksimal di tahun 2007. Bahkan secara umum dapat dikatakan gagal. Meskipun menyatakan bahwa sepanjang tahun 2007 total kasus korupsi yang ditangani oleh kejaksaan di seluruh Indonesia berjumlah 1335 kasus. Namun secara kualitas tidak banyak kasus korupsi kelas kakap (*big fish*) baik dari segi aktor maupun jumlah kerugian negara yang berhasil diproses hingga pada tahap pengadilan, Penanganan perkara korupsi Bantuan Likuidasi Bantuan Indonesia (BLBI) yang merugikan keuangan negara sekitar Rp 150 triliun sejak tahun 1998 hingga tahun 2007 tidak kunjung selesai, perkara korupsi yang melibatkan para politisi ditingkat nasional dan mantan petinggi militer juga tidak tersentuh.

Kejaksaan juga masih bersikap kompromi terhadap kepentingan politik. Kejaksaan hanya tegas terhadap pelaku korupsi yang tidak memiliki *handicap* politik. Sedangkan terhadap mereka yang memiliki dukungan kuat secara politis, cenderung melemah. Hal ini dapat ditunjukkan dengan tidak dieksekusinya 33 orang koruptor asal Sumatera Barat yang berasal dari berbagai partai politik yang berkuasa di Indonesia meskipun sudah memiliki putusan yang berkekuatan hukum tetap (*inkracht*). Hal yang sama juga dapat dilihat dari penyelesaian perkara korupsi yang melibatkan mantan Presiden Soeharto yang akhirnya dihentikan penuntutannya (SKPP) karena alasan sakit. Padahal instrumen hukum di Indonesia memungkinkan Soeharto diadili di pengadilan secara *in absentia* (tanpa kehadiran terdakwa).

Kegagalan yang sama juga dialami pada saat pengembalian aset hasil korupsi berupa uang pengganti. Dari total jumlah uang pengganti yang harus dieksekusi oleh Kejaksaan sebesar Rp 11,034 triliun dan US\$ 301,45 juta yang baru tertagih Rp 4,153 triliun dan USD 189 ribu (40 %). Sedangkan yang belum dapat ditagih lebih dari separuhnya atau sebesar Rp 6,9 triliun dan USD 111,9 juta.

Pemberantasan korupsi yang digulirkan oleh pemerintah juga tidak diikuti dengan perbaikan sistem atau reformasi di institusi kejaksaan. Presiden sejauh ini belum menghapuskan adanya izin pemeriksaan bagi kepala daerah yang diduga terlibat korupsi meskipun dinilai menghambat pemberantasan korupsi. Padahal birokrasi perizinan pemeriksaan terhadap kepala daerah kenyataannya masih dinilai sebagai penyebab *mandegnya* penuntasan beberapa kasus korupsi di daerah. Reformasi institusi di kejaksaan juga belum tuntas meskipun sudah digulirkan sejak tahun 2005. Dari 6 point reformasi atau pembaruan di kejaksaan (Rekrutmen Jaksa; Pembinaan Karir Jaksa; Pendidikan dan Pelatihan Kejaksaan; Standar Minimum Profesi Jaksa (SMPJ); Kode Perilaku Jaksa dan Sistem Pengawasan Jaksa), yang baru terlihat hasilnya hanyalah reformasi di bidang pengawasan jaksa.

Kejaksaan pun, ternyata bermasalah dalam hal [uang pengganti](#)<sup>14</sup>. Berdasarkan catatan BPK, jumlah uang pengganti yang dilaporkan belum ditagih Kejaksaan adalah Rp. 6,9 miliar dan 111,9 US\$. Dan, berdasarkan pantauan ICW, jumlah tersebut meingkat hingga Rp. 8 triliun. Hal ini merupakan catatan hitam gerakan anti korupsi yang justru bermasalah pada tingkatan sangat mendasar, yakni berhubungan dengan buruknya kinerja dan sistem internal di institusi penegak hukum (Kejaksaan, Kepolisian dan Peradilan).

Pengelolaan uang pengganti kerugian negara yang sudah dieksekusi juga perlu mendapat perhatian khusus. Kejaksaan seringkali mengklaim telah berhasil menyelamatkan uang negara dalam jumlah besar. Namun, data Departemen Keuangan menunjukkan jumlah uang yang disetorkan jauh lebih kecil dari yang sudah disetorkan.

Pengelolaan aset sitaan juga harus menjadi perhatian serius karena tidak transparannya kejaksaan. Menurut laporan satu tahun agenda pembaharuan kejaksaan, aset yang berada dalam penyitaan

Menteri Hukum dan HAM (Menkum dan HAM) **Hamid Awaludin** mengakui bahwa uang Tommy Soeharto US\$ 10 juta ditransfer oleh **BNP Paribas**, Inggris, melalui Rekening Depkum dan HAM. Namun menurut Hamid, proses pencairan uang Tommy sudah dimulai sejak Departemen Hukum dan HAM dipimpin **Yusril Ihza Mahendra**.

(Sumber: detik.com (03/05/2007))

<sup>14</sup> Lampiran, Daftar Beberapa Tunggakan Uang Pengganti Kerugian Negara di Jakarta.

senilai US \$ 11.000,- dan Rp 2 triliun. Mengingat aset yang disita jumlahnya sangat besar, seharusnya pengelolaan aset dibenahi agar memenuhi asas akuntabilitas dan transparansi. Contoh penyimpangan adalah pelepasan aset sitaan dari terpidana Lee Darmawan, mantan Direktur Bank Asia. Pengelolaan aset yang tidak jelas misalnya dalam pengelolaan ratusan miliar aset terpidana Edy Tansil yang telah melarikan diri.

Dalam hubungannya dengan terdakwa dan terpidana yang [buron](#)<sup>15</sup>, deretan persoalan di institusi kejaksaan memperkuat argumentasi awal tentang buruknya kinerja kejaksaan. Beberapa penangguhan penahanan, bahkan oknum kejaksaan yang bekerjasama dengan koruptor seringkali menjadi latar belakang persoalan. Di tahun 2006 saja, berdasarkan catatan ICW, setidaknya 4 kasus besar dengan kerugian negara lebih dari Rp. 100 miliar akhirnya tidak dapat dieksekusi oleh kejaksaan.

Selain itu, korupsi Soeharto dan Tentara Nasional Indonesia (TNI) merupakan wilayah yang hampir tidak tersentuh dalam gerakan pemberantasan korupsi. Di ranah militer masih ada dua kasus yang ditangani (pengadaan Heli MI-17 oleh Departemen Pertahanan dan TNI Angkatan Darat dan Tabungan wajib prajurit Angkatan Darat).

Petinggi Partai GOLKAR dan kroni-kroni Soeharto mengeluarkan pernyataan agar Soeharto diampuni dan proses hukumnya dihentikan.

Namun, korupsi yang dilakukan Soeharto selama menjabat 32 tahun benar-benar tidak tersentuh. Padahal, bahkan Pada 17 September 2007, PBB dan Bank Dunia meluncurkan Stolen Asset Recovery (StAR) Initiative di Markas Besar PBB, New York. Menurut StAR, Soeharto telah mencuri dan melakukan korupsi senilai US\$ 15-35 miliar, atau mencapai Rp. 300 triliun.

Penanganan kasus Soeharto dinilai sengaja digantung tanpa kejelasan. Harapan muncul ditahun 2006, saat kejaksaan dibawah pimpinan Jaksa Agung Abdul Rahman Saleh melanjutkan kembali penyidikan dan akhirnya melimpahkan perkara pidana tersebut ke pengadilan. Sayangnya, tiba-tiba kejaksaan menghentikan penuntutan perkara tersebut melalui Surat Ketetapan Penghentian Penuntutan Nomor TAP.01/O.1.14/Ft.1/05/2006. Alasannya, Soeharto sakit permanen sehingga tidak dapat diajukan ke muka persidangan. Dihentikannya penuntutan terhadap mantan orang nomor satu yang diduga terlibat dalam banyak korupsi ini jelas menunjukkan diskriminasi dalam penegakan hukum.

### **Pusat Pelaporan dan Analisis Transaksi Keuangan (PPATK)**

Pusat Pelaporan dan Analisis Transaksi Keuangan (PPATK) mengungkapkan adanya 2.604 laporan transaksi keuangan mencurigakan (STR) pada kurun 2003 hingga akhir Agustus 2007 di empat bank milik negara. Rata-rata terdapat 651 laporan per bank milik negara<sup>16</sup>.

Sedangkan berdasarkan dokumen refleksi akhir tahun, PPATK melaporkan adanya klasifikasi penyimpangan keuangan yang diduga terdistribusi pada berbagai jenis kejahatan.

Laporan Hasil Analisis (LHA) yang telah diserahkan PPATK kepada aparat penegak hukum (Kepolisian dan Kejaksaan) sebanyak 522 kasus dari 895 LTKM yang dinalisis. Sepanjang tahun 2007, modus operandi yang cukup menonjol antara lain korupsi/penggelapan (231 kasus), penipuan

<sup>15</sup> Lampiran, Daftar Tersangka/Terdakwa/Terpidana Korupsi yang Buron Pasca Ratifikasi UNCAC.

<sup>16</sup> <http://www.ppatk.go.id/berita.php?nid=2047>

### Distribusi Modus Operandi Penyelewengan Keuangan

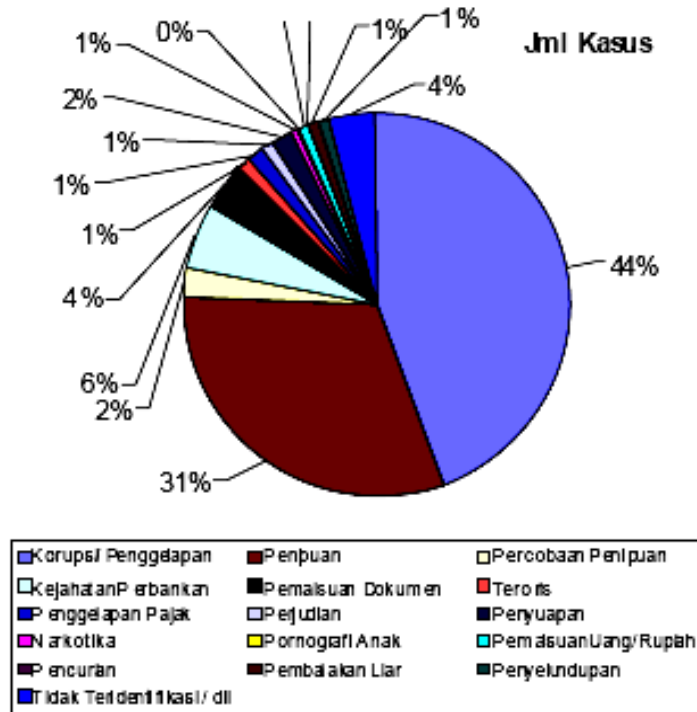

Pengadilan umum secara keseluruhan memberikan kontribusi besar makin melemahnya upaya pemberantasan korupsi di Indonesia. Mahkamah Agung dan pengadilan dibawahnya (Pengadilan Tinggi dan Pengadilan Negeri), masih menjadi lembaga yang berpihak pada pelaku korupsi. Hal ini bisa dilihat dari perkara korupsi yang diperiksa dan diputus pengadilan sepanjang tahun 2007.

<sup>17</sup> [http://www.ppatk.go.id/pdf/ppatk\\_refleksi\\_akhir\\_tahun\\_2007.pdf](http://www.ppatk.go.id/pdf/ppatk_refleksi_akhir_tahun_2007.pdf)

Kondisi di pengadilan umum jelas sangat berbanding terbalik dengan penanganan perkara korupsi yang ditangani oleh Pengadilan Tindak Pidana Korupsi (Pengadilan Tipikor). Selama tiga tahun terakhir sedikitnya 43 perkara telah diperiksa dan diputus oleh Pengadilan Tipikor. Seluruh terdakwa divonis bersalah dan tidak ada satupun yang vonis bebas atau lepas.

Terhadap fenomena putusan bebas/lepas di pengadilan umum, dalam catatan dan kajian ICW hal ini dapat terjadi akibat beberapa sebab seperti terdakwa memang tidak terbukti bersalah, dakwaan yang disusun oleh jaksa lemah atau sengaja dilemahkan, hakim mencari-cari pertimbangan yang menguntungkan bagi terdakwa, atau karena kombinasi antara dakwaan yang lemah dan hakim yang mencari-cari pertimbangan yang menguntungkan. Tiga sebab terakhir yang paling dominan ditemui dari sejumlah putusan hakim yang menjatuhkan vonis bebas bagi para pelaku. Kondisi ini makin diperparah akibat lemahnya pengawasan internal (dari Mahkamah Agung) dan eksternal (dari Komisi Yudisial) terhadap para hakim-hakim disemua lingkungan peradilan.

#### **B. Upaya Delegitimasi Institusi Pemberantas Korupsi**

Fokus terpenting pelemahan gerakan antikorupsi dan serangan balik koruptor hingga tahun 2007 adalah upaya delegitimasi institusi pemberantasan korupsi atau penegak hukum. Komisi Yudisial (KY) dan Komisi Pemberantasan Korupsi (KPK) adalah objek yang seringkali diserang.

Awalnya, ditengah ketidakpercayaan publik terhadap institusi-institusi penegak hukum seperti Mahkamah Agung dan Peradilan Umum, Kejaksaan dan Kepolisian, maka kehadiran KPK dan KY memberikan harapan baru. Namun, dalam perjalanannya tindakan dan gerakan yang dilakukan dua institusi ini dinilai membahayakan struktur mafia koruptor yang ada di Indonesia. Sehingga, ada upaya yang dilakukan kalangan korup untuk menghancurkan kekuatan yang mengancam mereka.

Dari pemantauan rutin yang dilakukan NGOs/CSOs antikorupsi di Indonesia ditemukan tiga pendekatan yang dilakukan dalam rangka penghancuran institusi pemberantasan korupsi, yaitu: *Pertama*, Mereduksi kewenangan masing-masing institusi, salah satunya dilakukan dengan cara mengajukan Uji Materil (*Judicial Review*) ke Mahkamah Konstitusi; *Kedua*, Pengabaian atas panggilan, pelaksanaan tugas atau upaya menjalankan kewenangan institusi pemberantasan korupsi meskipun tugas tersebut dijamin undang-undang; dan *Ketiga*, Pembajakan pada proses pemilihan pimpinan/pejabat publik.

#### **C.1 Delegitimasi Komisi Yudisial**

Pada bagian sebelumnya tentang kebijakan, tindakan dan pernyataan kontradiktif yang menghambat pemberantasan korupsi telah disinggung perihal upaya penghancuran Komisi Yudisial. Melalui jalan pengajuan Uji Materil (*Judicial Review*) pada Mahkamah Konstitusi, ternyata 31 hakim agung berhasil mengebiri kewenangan KY secara signifikan. Sehingga, KY tidak mempunyai kewenangan untuk mengawasi Hakim Konstitusi dan hakim agung.

#### **Pernyataan kontroversial Ketua Mahkamah Agung, Bagir Mannan:**

**I.** "Pemberantasan Korupsi yang dilakukan seharusnya bukan untuk mencari tersangka, tetapi mengedepankan pengembalian kerugian negara"

(*Suara Merdeka, 06 agustus 2006*)

Padahal menurut UU 31/1999 jo 20/2001,

"pengembalian kerugian negara tidak menghilangkan pertanggungjawaban pidana"

**II.** Menolak Eksistensi Pengadilan Ad Hoc Tipikor di beberapa daerah di Indonesia

(*Sumber: Suara Pembaruan, 10 April 2007*)

>> Padahal 100 % kasus korupsi yang diadili di Pengadilan Ad Hoc rata-rata dihukum 4,4 tahun. Tidak satupun dibebaskan.



Hal kontroversial diperparah melalui putusan Mahkamah Konstitusi dalam perkara No. 005/PUU-IV/2006 yang memotong kewenangan pengawasan Komisi Yudisial secara signifikan, dan bahkan memutus diluar apa yang dimintakan pemohon (*ultra petita*). Dari berbagai forum ilmiah, eksaminasi, dan penelitian yang dilakukan akademisi bersama masyarakat sipil, putusan MK tentang Uji Materi UU KY ini dinilai salah kaprah dan mempunyai andil besar untuk menyuburkan korupsi di Indonesia.

Poin putusan MK yang secara vulgar menegaskan adanya konflik kepentingan dan kecenderungan anti pengawasan dan anti akuntabilitas terdapat pada bagian yang menyatakan Komisi Yudisial tidak mempunyai kewenangan mengawasi Hakim Konstitusi. Metode pereduksian kewenangan melalui mekanisme hukum *Judicial Review* ini dinilai berhasil dan semakin menguntungkan kelompok mafia koruptor di Indonesia. Dengan melemahnya Komisi Yudisial, maka fungsi pengawasan dan penegakan etika moralitas hakim akan sangat terhambat. Ditengah ketidakpercayaan publik, maraknya suap yang merasuk hingga membangun struktur mafia peradilan, inkonsistensi putusan hakim, serta tren penyelesaian perkara dengan uang jelas-jelas akan sangat melemahkan gerakan antikorupsi di Indonesia.

Ketua Mahkamah Agung, Bagir Manan tercatat juga bersebrangan dengan Komisi Yudisial. Hal ini dapat dilihat dari pernyataan kontroversial yang seringkali diungkapkannya. Bagir Manan sempat melarang para hakim untuk menerima penghargaan dari Komisi Yudisial<sup>18</sup> dan dengan nada tinggi menentang tindakan Komisi Yudisial memeriksa hakim bermasalah<sup>19</sup>. Sindrom kekuasaan Ketua Mahkamah Agung menolak eksistensi Komisi Yudisial dinilai bertentangan dengan amanat konstitusi, karena KY sendiri adalah lembaga negara yang diatur secara tegas oleh konstitusi untuk menjalankan tugas mengawasi dan menegakkan etika, moralitas dan perilaku hakim.

## C.2 Deligitimasi Komisi Pemberantasan Korupsi

Komisi Pemberantasan Korupsi (KPK) adalah salah satu dari delapan lembaga independen antikorupsi yang pernah dibentuk di Indonesia. Tujuh lembaga lainnya terbunuh sebelum mampu berbuat banyak<sup>20</sup>. Hal yang sama sedang diupayakan untuk menghancurkan KPK.

Berbeda dengan Komisi Yudisial, upaya penghancuran Komisi Pemberantasan Korupsi dinilai lebih sistematis. Hingga disampaikan laporan ini, tercatat telah tujuh kali UU 30/2002 tentang [KPK di judicial review](#)<sup>21</sup> pada Mahkamah Konstitusi.

Berdasarkan pengajuan Bram H.D. Manoppo, MK dalam Putusan Nomor 069/PUU-II/2004 menyatakan bahwa KPK tidak dapat menangani perkara yang terjadi sebelum tanggal diterbitkannya UU KPK, yakni 27 Desember 2002. Hal ini berimplikasi terhadap tidak tersentuhnya kasus-kasus masa lalu yang justru sangat besar merugikan keuangan negara. Poin yang ditentang akademisi dan

---

<sup>18</sup> Tempointeraktif, 11 agustus 2007

<sup>19</sup> Surat Kabar Harian Seputar Indonesia, 11 Agustus 2007

<sup>20</sup> **Pertama**, melalui Keppres No. 228/1967 dibentuk Tim Pemberantas Korupsi; **Kedua**, 3 tahun kemudian, 31 januari 1970 melalui Keppres 12/1970 dibentuk Tim Komisi Empat; **Ketiga**, pada tahun yang sama juga diusung nama baru Komite Anti Korupsi (KAK); **Keempat**, tahun 1977 dengan Inpres 9/1977 tim OPSTIB; **Kelima**, tahun 1982 Tim Pemberantas Korupsi diaktifkan kembali meskipun keppres yang mengatur tentang tugas dan kewenangan tim ini tidak pernah diterbitkan; **Keenam**, melalui Keppres No. 127 tahun 1999 dibentuk Komisi Pemeriksaan Kekayaan Penyelenggara Negara (KPKPN), dan **Ketujuh**, berdasarkan PP 19/2000 juga dikukuhkan Tim Gabungan Pemberantasan Tindak Pidana Korupsi (TGTPK).

<sup>21</sup> Lampiran, *Judicial Review* terhadap UU 31/1999 jo UU 20/2001 & UU 30/2002 tentang KPK



NGOs/CSOs anti korupsi adalah penerapan asas legalitas secara tidak tepat oleh MK. Karena kewenangan yang dijalankan KPK sebenarnya berada di ranah formil, sedangkan asas legalitas sebenarnya mengatur persoalan hukum materil. Selain itu, KPK juga diberi kewenangan untuk mengambilalih kasus korupsi yang telah ditangani Kejaksaan karena alasan tertentu. Dengan adanya putusan MK, maka dasar filosofis pembentukan KPK untuk memberantas korupsi disaat Kejaksaan dan Kepolisian tidak dapat dipercaya dieliminir sedemikian rupa.

Pengajuan *Judicial Review* terhadap UU KPK yang diajukan Mulyana W. Kusuma, mantan anggota KPU yang divonis karena korupsi dinilai juga kontroversial. Putusan yang dibacakan tanggal 19 Desember 2006 ini menyatakan pasal 53 UU KPK bertentangan dengan UUD 1945, yaitu tentang dasar hukum pengadilan tindak pidana korupsi (tipikor). Meskipun MK tidak langsung menyatakan pasal 53 UU KPK tersebut tidak punya kekuatan hukum mengikat, namun putusan ini akan menjadi tugas sekaligus pertarungan untuk melihat komitmen pemerintah bersama DPR merumuskan sebuah undang-undang tentang pengadilan tindak pidana korupsi yang baru.

Hingga tahun 2008 perkembangan penyusunan paket undang-undang anti korupsi justru membahayakan gerakan pemberantasan korupsi. Prof. Andi hamzah, akademisi hukum dan ketua tim perumus rancangan undang-undang Tindak Pidana Korupsi dari pemerintah justru berupaya menghilangkan eksistensi pengadilan tipikor dan menginginkan semua kasus korupsi kembali di proses di peradilan umum. Upaya ini merupakan bagian tidak terpisahkan dari upaya penghancuran institusi pemberantasan korupsi.

Metode pembiaran pun dilakukan ketika KPK menjalankan tugasnya. Ketua Mahkamah Agung, Bagir Manan adalah salah satu aktor yang menolak pemanggilan dirinya oleh KPK. Dalam pernyataannya seringkali diungkapkan bahwa Mahkamah Agung adalah lembaga yang tidak mungkin mati, sedangkan KPK hanyalah bersifat sementara, sehingga tidak pantas bagi Ketua Mahkamah Agung untuk tunduk pada panggilan KPK.

Upaya penghancuran berikutnya dilakukan dengan metode membajak proses pemilihan pimpinan KPK. Metode ini dilakukan dengan berlingkungan dibalik proses demokratisasi. Pada mekanisme *fit and proper test* di parlemen (Komisi III DPR-RI) upaya untuk menempatkan aktor-aktor bermasalah dilakukan dengan sangat fulgar.

Melihat dari intensitas dan kualitas pertanyaan yang diajukan anggota Komisi III DPR ketimpangan dan keberpihakan sangat terlihat. Pada calon yang punya prestasi dan rekam jejak yang baik dalam memberantasan korupsi, pertanyaan yang menyudutkan bahkan tuduhan diajukan secara bertubi-tubi. Sedangkan, pada calon yang akan diusung *fit and proper test* cenderung diajukan secara basabasi.

Seleksi pimpinan KPK ini pada akhirnya menempatkan individu kontroversial. Berdasarkan rekam jejak yang dilakukan NGOs/CSOs dapat dinilai, bahwa dua pimpinan KPK, termasuk Ketua KPK, yang dipilih DPR justru adalah orang yang punya rekam jejak buruk selama bertugas di Kejaksaan dan Kepolisian.

#### **D. Lembaga Donor Anti Korupsi**

Program kebijakan antikorupsi di Indonesia tidak dapat dilepaskan dari peran serta dan bantuan lembaga donor. Namun bantuan lembaga donor tersebut masih berorientasi pada penguatan kapasitas, kompetensi dan prosedural governance institusi pemerintah.

Beberapa contoh penting dapat dilihat dari tabulasi dan [matrix donor antikorupsi](#)<sup>22</sup> yang disusun ICW. Donor yang juga terdiri dari USAID, GTZ, BMZ, ADB, NORAD, Europa Union (EU), DANIDA, World Bank (WB), IOM-OIM tercatat telah mengalokasikan anggaran yang sangat besar untuk mendorong perbaikan di beberapa institusi, seperti Mahkamah Agung, KPK, Kejaksaan RI, POLRI, Badan Rekonstruksi dan Rehabilitasi (BRR), Bappenas, Kementrian PAN, Direktorat Hukum dan Perundang-undangan, Departemen Keuangan, dan departemen-departemen lainnya.

Tidak terjadinya perbaikan signifikan dan penurunan level korupsi baik dalam jangka pendek atau pun proyeksi jangka panjang sebagai pengaruh bantuan lembaga donor seharusnya menjadi catatan kritis tentang efektifitas penyaluran bantuan terhadap institusi pemerintahan Indonesia.

\* \* \*

---

<sup>22</sup> Lampiran, matrikulasi donor antikorupsi terhadap institusi negara Indonesia.

## Bab IV

# Pemenuhan UNCAC dalam Hukum Indonesia

Indonesia adalah salah satu dari 103 negara yang telah meratifikasi konvensi pada tanggal 19 September 2006, yang dituangkan pada Undang-Undang 7 Tahun 2006 tentang Pengesahan *United Nations Convention Against Corruption*, 2003. Sebagai negara pihak, Indonesia berkepentingan sekaligus berkewajiban melakukan penyesuaian standar hukum, regulasi, dan strategi pemberantasan korupsi di level Internasional.

Dengan kata lain, gerakan global pemberantasan korupsi harus dibangun atas standar umum yang sama di masing-masing negara pihak. Di titik inilah sebuah *domestic legal framework* yang dikongkritkan pada peraturan perundang-undangan, termasuk kitab undang-undang hukum pidana merupakan sebuah kebutuhan prinsipil<sup>23</sup>. Peraturan perundang-undangan yang signifikan membangun kerangka hukum perlawanan korupsi setidaknya mencakup: Undang-undang nomor 28 tahun 1999 tentang Pemerintahan yang Bersih dari Korupsi, Kolusi dan nepotisme; Undang-Undang nomor 31 tahun 1999 jo Undang-Undang 20 tahun 2001 tentang Pemberantasan Tindak Pidana Korupsi; Undang-Undang Nomor 30 tahun 2002 tentang Komisi Pemberantas Korupsi; Undang-Undang Nomor 15 Tahun 2002 dan Undang-Undang Nomor 25 Tahun 2003 tentang Pencucian Uang; dan Undang-Undang Nomor 13 Tahun 2006 tentang Lembaga Perlindungan Saksi dan Korban.

Secara umum pengamat hukum Indonesia mencatat, kerangka diatas telah dapat menjadi modal awal yang cukup kuat dalam gerakan anti-korupsi di Indonesia. Akan tetapi kerangka perundang-undangan diatas dinilai masih mempunyai cacat di beberapa titik yang fundamental, seperti:

1. Resistensi pemerintah dan beberapa kalangan DPR yang berakibat menghambat pengesahan undang-undang tentang Kebebasan Memperoleh Informasi Publik (KMIP);
2. Upaya pelemahan KPK dengan cara mengurangi kewenangan KPK hanya sampai di level penyidikan melalui revisi UU KPK. Padahal lembaga anti korupsi ini dikategorikan UNCAC sebagai lembaga permanen yang harus ada, dan diinginkan mempunyai kemandirian bahkan hingga proses perekrutan penyidik dan penuntut secara mandiri (bukan menggunakan sumber daya kejaksaan dan kepolisian seperti yang diterapkan hingga akhir tahun 2007).
3. Mengatur persoalan pengadaan barang dan jasa di level undang-undang.
4. Mendorong pembentukan sebuah lembaga ombudsman melalui undang-undang.

---

<sup>23</sup> Hal ini juga diterapkan pada konsep kerjasama domestik dan Internasional untuk program anti pencucian uang dan perang terhadap pembiayaan terorisme.

Lihat: Latifah Merican Cheong, et all. (Program Directors), Domestic (Inter-Agency) and International Cooperation; Capacity Enhancement Program on Anti-Money Laundering and Combating the Financing of Terrorism, Word Bank dan IMF, 2005. Page 36.

5. Sinkronisasi UU Peradilan (UU Mahkamah Agung, UU Mahkamah Konstitusi dan UU Komisi Yudisial)
6. Penguatan semangat antikorupsi melalui revisi paket UU Tipikor, UU Pengadilan Tipikor, dan UU KPK.
7. Studi tentang perundang-undangan di bidang perpajakan dan yang berhubungan dengan pengelolaan keuangan negara.

*Gap Analysis* hukum Indonesia terhadap UNCAC yang sebelumnya disusun Komisi Pemberantasan Korupsi (KPK) dipandang sebagai upaya awal untuk membangun semacam *domestic legal framework* tersebut. Dengan maksud menetapkan standar umum aturan pemberantasan korupsi di lintas negara. KPK mencoba melakukan analisis dan menuangkannya dalam bentuk tabulasi dengan menyandingkan isi UNCAC dan peraturan perundang-undangan Indonesia, analisis, aspek lain yang perlu diperhatikan serta poin rekomendasi.

Laporan independen ini mencoba mencermati rekomendasi yang terdapat pada *Gap Analysis* KPK, menganalisis secara kritis tingkat ketepatan rekomendasi, menilai kemanfaatan pengadopsian bagian-bagian tertentu UNCAC<sup>24</sup>, dan kemudian memonitoring realisasi rekomendasi dalam hukum Indonesia terhitung sampai dengan Desember 2007. Seperti dijelaskan diatas, objek analisis laporan ini difokuskan pada aspek pemberantasan korupsi, yakni beberapa pasal krusial dalam Bab III UNCAC. Secara umum, analisis awal dapat dicermati dari tabel yang dilampirkan bersama laporan independen ini.

Sebagai sebuah upaya merumuskan regulasi tingkat nasional yang sesuai dengan standar Internasional tentang pemberantasan korupsi, maka laporan ini akan mencoba menjelaskan fenomena kesenjangan (*gap*) antara aturan Indonesia dan amanat UNCAC. Dengan menggabungkan teknis *check list* pemenuhan pasal per-pasal Bab III UNCAC dengan regulasi yang telah diatur dalam hukum Indonesia serta *content analysis* masing-masing peraturan, maka bagian-bagian perundang-undangan yang dinilai prinsipil akan dijelaskan lebih jauh seperti dibawah ini.

#### Pasal 15

#### **Penyuapan Pejabat-pejabat Publik Nasional**

Mengacu pada berkas *legislative guide* yang dikeluarkan oleh *United Nation Office on Drugs and Crime* (UNODC), dijelaskan bahwa negara pihak harus mengatur "penyuapan" sebagai kejahatan. Ketentuan ini kemudian diklasifikasikan menjadi dua; penyuapan aktif dan penyuapan pasif<sup>25</sup>. Selain itu, hal prinsip yang secara tegas dicantumkan, sifat pengaturan pasal ini adalah "wajib mengadopsi" (*shall adopt*). Dengan kata lain, perundang-undangan yang berhubungan dengan penyuapan di negara pihak minimal memenuhi standar yang diatur pada Pasal 15 UNCAC. Secara *a-contrario*, Pasal 65 ayat (2) UNCAC menyebutkan bahwa setiap negara peserta dapat mengadopsi tindakan-tindakan yang lebih keras atau kuat dari yang diatur oleh konvensi ini untuk mencegah dan memerangi korupsi.

---

<sup>24</sup> Tinjauan Pemenuhan UNCAC dalam hukum Indonesia dengan menempatkan Gap Analysis KPK sebagai bahan dasar merupakan hasil analisis bersama antara Indonesia Corruption Watch (ICW) dan Arsil, peneliti LeIP (Lembaga Kajian dan Advokasi untuk Independensi Peradilan).

<sup>25</sup> United Nation Office on Drugs and Crime Division for Treaty Affairs, 2006, *Legislative Guide for The Implementation of The United Nation Convention Against Corruption*, New York. Page 80-81

Hal prinsip lainnya, Pasal 15 tidak dapat dipisahkan dari definisi Pejabat Publik yang diatur pada Pasal 2 butir (a), bahkan UNODC menegaskan bahwa Pasal 2 butir (a) adalah substansi minimal yang harus diatur hukum nasional<sup>26</sup>. Jika dicermati, aturan hukum Indonesia masih terlalu sempit dibanding definisi yang diberikan pada Pasal 2 butir (a). Selain sempit, terminologi yang digunakan pun relatif berbeda di masing-masing perundang-undangan, yaitu: Pegawai Negeri (Pasal 1 butir (1) UU 8/1974 jo UU 43/1999 dan Pasal 1 butir (2) UU 31/1999 jo UU 20/2001); Pejabat Negara (Pasal 1 butir (4) dan Pasal 11 ayat (1) UU 8/1974 jo UU 43/1999); dan, Penyelenggara Negara (Pasal 1 angka (1) UU 28/1999). Hal inilah yang samasekali tidak disinggung dalam rumusan *Gap Analysis* KPK.

Perkembangan yang relatif maju dirumuskan pada Rancangan Undang-Undang Pemberantasan Tindak Pidana Korupsi (RUU TIPIKOR) inisiatif masyarakat<sup>27</sup>. Berdasarkan draft ke-5 per 11 Agustus 2007, definisi Pejabat Publik telah diatur dengan lebih detil dibanding perundang-undangan Indonesia yang disebutkan sebelumnya. Definisi pada Pasal 1 butir (4) ini ditekankan pada apakah seseorang menerima gaji, fasilitas atau bantuan pendanaan yang berhubungan dengan keuangan negara/daerah. Bahkan Direksi, komisaris dan pejabat struktural pada BUMN dan BUMD serta Notaris telah diklasifikasikan sebagai Pejabat Publik. Akan tetapi, mencermati UNCAC, hal prinsip yang dilupakan perumus adalah definisi Pejabat Publik yang juga harus ditekankan pada aspek fungsional, yakni setiap orang yang melaksanakan fungsi publik atau memberikan pelayanan publik (Pasal 2 butir (a) angka (ii dan iii).

Sedangkan, RUU TIPIKOR versi pemerintah yang dirumuskan oleh Tim dari Departemen Hukum dan HAM tidak memperhatikan konsistensi dan pemenuhan terminologi Pejabat Publik. Seperti dinilai banyak kalangan RUU ini cenderung mundur dan lemah jika dilihat dari perspektif gerakan perlawanan terhadap korupsi.

Kembali pada rumusan Pasal 15 tentang penyuapan, unsur yang juga belum terdapat pada peraturan Indonesia adalah unsur “menawarkan” (offer) untuk penyuapan aktif, dan unsur “permohonan” (solicitation) untuk penyuapan pasif. Hal ini dapat dilihat dari rumusan Pasal 5 ayat (1), (2), Pasal 6 ayat (1), (2), Pasal 11, Pasal 12, dan Pasal 13 UU 31/1999 jo 20/2001 tentang Pemberantasan Tindak Pidana Korupsi. Sementara RUU TIPIKOR inisiatif masyarakat baru mengadopsi unsur “menawarkan” dan belum mengatur tentang unsur “permohonan” untuk penyuapan pasif.

#### Pasal 17

#### **Penggelapan, Penyelewengan atau Pengalihan Kekayaan dengan Cara Lain oleh Seorang Pejabat Publik**

Sebagian substansi pasal ini telah diatur pada Pasal 8, 9, 10 UU 31/1999 jo 20/2001. UU Namun, Pasal UU TINDAK PIDANA KORUPSI tersebut hanya mengatur tentang penggelapan, pemalsuan

---

<sup>26</sup> Ibid. Page 10 dan Page 83

<sup>27</sup> “Article 2 defines several important terms recurring throughout the Convention. National legislation may include broader definition but should, as a minimum, cover what is required as according to the Convention”. (P. 10).

<sup>27</sup> RUU ini disusun sebagai inisiatif masyarakat atas kerjasama Koalisi Pemantau Peradilan (KPP) yang terdiri dari Indonesia Corruption Watch (ICW), Lembaga Kajian dan Advokasi untuk Independensi Peradilan (LeIP), Masyarakat Pemantau Peradilan Indonesia Fakultas Hukum Universitas Indonesia (MaPPI), Konsorsium reformasi Hukum Nasional (KRHN), Lembaga Bantuan Hukum (LBH) Jakarta, dan Pusat Studi Hukum dan Kebijakan (PSHK), dengan Kemitraan-The Partnership for Governance Reform.

data administrasi, penghilangan, penghancuran, pengrusakan dan/atau kegiatan yang membuat tidak dapat digunakan barang-barang yang dikuasai karena jabatan seorang pejabat publik.

Akan tetapi, UU TINDAK PIDANA KORUPSI belum mengatur kegiatan "pengalihan kekayaan atau barang dalam bentuk apapun yang dipercayakan kepada pejabat publik berdasarkan kedudukannya" sebagai sebuah tindak pidana. Selain itu, hukum Indonesia perlu menegaskan definisi "Kekayaan" dan "Hasil Kekayaan" pada revisi UU TINDAK PIDANA KORUPSI. Jika diteliti, UU TINDAK PIDANA KORUPSI yang ada cenderung masih berangkat dari filosofi Kantianisme dengan pendekatan retributif yang hanya menitik beratkan pada aspek kerugian keuangan negara. Padahal, terminologi "Kekayaan" yang diatur pada Pasal 2 butir (d) Konvensi mencakup hal yang lebih luas. Hal ini telah diadopsi pada RUU TIPIKOR inisiatif masyarakat, yakni Pasal 1 butir (8).

#### Pasal 18

##### **Memperdagangkan Pengaruh**

Gap Analysis KPK menilai substansi pasal ini relatif telah diadopsi pada Pasal 3 UU 31/1999 jo 20/2001. Akan tetapi, melihat pada penguraian unsur-unsur pasal, dapat dikatakan Pasal 18 Konvensi mempunyai maksud dan tujuan yang sangat berbeda dengan Pasal 3 UU TINDAK PIDANA KORUPSI.

Pasal 3 lebih berbicara pada aspek "penyalahgunaan kewenangan yang berakibat merugikan keuangan atau perekonomian negara", sedangkan Pasal 18 menghendaki agar "pihak yang menawarkan, menjanjikan atau memberikan sesuatu dengan maksud mempengaruhi otoritas publik atau administrasi seorang pejabat agar menguntungkan dirinya atau orang lain" dapat dijerat pidana korupsi. Poin inti yang dapat diambil dari pasal 18 terletak pada "hubungan sebab-akibat" atau minimal "dapat diperkirakan berhubungan" antara upaya pelaku untuk mempengaruhi dengan kebijakan, regulasi atau sejenisnya yang dikeluarkan berdasarkan otoritas pejabat publik.

Hubungan tersebut kemudian menguntungkan pihak lain, bisa perorangan atau pun korporasi. Dalam titik ekstrim kondisi ini sangat berpotensi mengarah pada "State Capture Corruption". Karena negara dipengaruhi/dibajak sedemikian rupa melalui kebijakan yang dikeluarkan pejabat publik. Meskipun kadang tidak merugikan keuangan negara. Sehingga, substansi pasal 18 Konvensi sangat disarankan diatur setelah mungkin dalam revisi UU TINDAK PIDANA KORUPSI.

#### Pasal 19

##### **Penyalahgunaan Fungsi**

Unsur pasal ini dinilai berhubungan dengan substansi Pasal 5 ayat (2) Konvensi yang dalam hubungan dengan tujuan konvensi, maka unsur Kerugian atau Kerusakan kekayaan negara bukan merupakan hal prinsip. Di Hukum Indonesia, rekomendasi Gap Analysis yang menyatakan bahwa substansi Pasal 19 Konvensi telah tercakup pada Pasal 2 UU TINDAK PIDANA KORUPSI dinilai tidak tepat. Karena Pasal 2 masih secara tegas menyebutkan terminologi kerugian keuangan negara.

Meskipun sifat pengaturan pasal ini dikategorikan "wajib mempertimbangkan (shall consider adopting)", akan tetapi mengingat semangat meminimalisir unsur kerugian negara merupakan bagian dari upaya memadukan keadilan distributif dan keadilan kumulatif, maka substansi ini patut diadopsi secara serius oleh Hukum Nasional Indonesia. Seperti diungkapkan Prof. Dr. Romly Atmasasmita, hal tersebut merupakan paradigma pemberantasan korupsi yang direvisi oleh UNCAC.

## Pasal 20

### **Memperkaya Secara Tidak Sah**

Sifat Rekomendasi pasal ini adalah "wajib mempertimbangkan". Namun, substansinya dinilai menarik dalam tujuan menjerat aset dan kekayaan koruptor yang tidak layak, tidak dapat dijelaskan atau tidak masuk akal jika dibandingkan dengan nilai pendapatan resmi. Sehingga pandangan Gap Analysis KPK yang mengatakan Pasal 20 Konvensi selaras dengan Pasal 2 UU 31/1999 jo 20/2001 dinilai tidak tepat. Karena unsur-unsur Pasal 2 cenderung dititikberatkan pada aspek pelaku yang melakukan perbuatan memperkaya diri sendiri secara melawan hukum. Sehingga syarat seseorang hanya dapat dijerat dengan Pasal 2 setidaknya harus melakukan perbuatan yang dilarang oleh Hukum Positif. Sedangkan substansi Pasal 20 Konvensi cenderung lebih menghendaki penjelasan terdakwa tentang kekayaan atau aset miliknya yang dinilai tidak masuk akal. Dengan kata lain, jika terdakwa tidak bisa menjelaskan, maka seharusnya Hukum Nasional mengatur mekanisme penyitaan, atau bahkan perampasan harta tersebut.

Selain itu, Pasal 37A ayat (1) dan (2) UU 31/1999 jo 20/2001 telah mengatur sebagian substansi Pasal 20 UNCAC. Akan tetapi, rumusan "penemuan adanya kekayaan yang tidak seimbang" pada UU TINDAK PIDANA KORUPSI cenderung hanya diposisikan sebagai keterangan yang memperkuat alat bukti, bukan sebagai sebuah kejahatan/tindak pidana tersendiri seperti yang diatur pada Pasal 20 UNCAC. Maka, dapat dikatakan, Hukum Indonesia belum mempunyai aturan yang benar-benar selaras dengan Pasal 20 UNCAC.

## Pasal 21

### **Penyuapan di Sektor Swasta**

Subtansi aturan ini belum diatur pada Hukum Nasional Indonesia. Mengingat kepentingan pemberantasan korupsi dalam UNCAC tidak semata dititikberatkan pada unsur kerugian negara, akan tetapi juga dalam konteks korelasinya dengan kejahatan ekonomi maka, upaya menjerat suap di kalangan swasta penting diatur. Selain perusahaan swasta seringkali menggunakan fasilitas, pinjaman, dan pendanaan lainnya dari pemerintah, persoalan suap dan birokrasi yang buruk di kalangan swasta yang produknya berhubungan dengan kepentingan publik dinilai akan membahayakan masyarakat, khususnya berpotensi menciptakan guncangan dalam sistem ekonomi nasional.

Dengan demikian disarankan agar revisi UU Tindak Pidana Korupsi mengatur hal ini secara cermat.

## Pasal 23

### **Pencucian Hasil Kejahatan**

Telah diatur pada Pasal 2 ayat (1) dan (2), Pasal 3 ayat (1) butir b, g dan ayat (2), Pasal 6 ayat (1) Undang-undang No. 15 Tahun 2002 dan Undang-Undang No. 25 Tahun 2003 tentang Tindak Pidana Pencucian Uang (TPPU).

Sifat rekomendasi pasal ini adalah "wajib mengadopsi (shall adopt)". Akan tetapi, penting diingat, amanat yang terdapat dalam UNCAC, khususnya Pasal 23 tidak terbatas harus dimuat dalam satu undang-undang anti korupsi. Gap Analysis KPK yang merekomendasikan agar beberapa pasal dalam UU TPPU diatas dimasukkan dalam revisi UU TINDAK PIDANA KORUPSI dinilai tidak perlu dilakukan. Karena pada prinsipnya, yang dikehendaki UNCAC adalah penetapan standar umum aturan dan poin-poin pemberantasan korupsi.

Pasal ini pun tidak dapat dipisahkan dari terminologi “predicate offence (kejahatan asal)” seperti diatur pada Pasal 2 butir (h). Pasal 23 sebenarnya sedang memberikan petunjuk tentang daftar dan bentuk *predicate offence* yang minimal harus dimiliki sesuai dengan UNCAC<sup>28</sup>. Dalam artian, pengaturan tersebut dapat saja dicantumkan pada beberapa undang-undang yang berbeda.

#### Pasal 25

##### **Perbuatan menghalang-halangi Proses Peradilan**

Substansi Pasal 25 butir a berhubungan dengan konsep perlindungan saksi yang dikategorikan pada perbuatan menghalang-halangi proses peradilan. Poin ini telah diatur pada Pasal 21 dan 22 UU 31/1999 dan 20/2001 tentang Pemberantasan Tindak Pidana Korupsi serta Pasal 5 ayat (1) butir a dan pasal 10 UU 13/2006 tentang Perlindungan Saksi dan Korban.

Sedangkan Pasal 25 butir b dititikberatkan pada ancaman atau intimidasi terhadap Hakim dan Pejabat Penegak Hukum. Maksud diaturnya secara khusus poin ini tentu tidak dapat dikatakan telah terpenuhi dengan keberadaan Pasal 21 UU TINDAK PIDANA KORUPSI, karena Pasal tersebut hanya menyebutkan “tersangka, terdakwa atau saksi dipersidangan”.

Sehingga sesuai dengan sifat rekomendasi Pasal 25 (shall adopt), maka dalam revisi UU TINDAK PIDANA KORUPSI harus dimuat ketentuan yang memposisikan Hakim, dan Penegak Hukum sebagai subjek yang dilindungi. Hal ini tidak saja berlaku selama masa persidangan, tetapi mencakup perlindungan selama kasus korupsi tersebut di proses.

#### Pasal 28

##### **Unsur Mengetahui, Niat dan Tujuan sebagai Unsur Tindak Pidana**

Belum diatur pada Hukum Indonesia.

#### Pasal 29

##### **Daluarsa**

Sepanjang tidak diatur secara khusus, perihal Daluarsa tunduk pada Bab VIII KUHP tentang Hapusnya Kewenangan Menuntut Pidana dan Menjalankan Pidana (Pasal 76-85).

Namun berangkat dari rekomendasi pada Gap Analysis KPK, sebaiknya pengaturan Daluarsa ditegaskan pada UU TINDAK PIDANA KORUPSI, bahkan jika perlu diatur tidak ada daluarsa pada penuntutan dan pemidanaan untuk TINDAK PIDANA KORUPSI”.

#### Pasal 31

##### **Pembekuan, Perampasan dan Penyitaan**

Gap Analysis KPK menegaskan bahwa substansi pasal ini telah diadopsi pada UU 31/1999 jo 30/2001 tentang Pemberantasan TIPIKOR dan UU 8/1981 (KUHP), sehingga berpandangan tidak diperlukan lagi pengaturan tambahan atau khusus di UU TINDAK PIDANA KORUPSI.

Padahal, substansi yang penting dipertimbangkan berhubungan dengan sulitnya menjangkau aliran uang mencurigakan (dalam hubungan dengan TINDAK PIDANA KORUPSI) yang menggunakan jasa perbankan. Karena proses tersebut terjadi sangat cepat dan rumit. Disinilah PPATK sebagai lembaga intelegensi keuangan Indonesia seharusnya dimaksimalkan kewenangannya. Misal, untuk

---

<sup>28</sup> UNODC Division for Treaty Affairs, Op. Cit. Page 89.



membekukan transaksi keuangan mencurikan sebagai hasil kejahatan (Pasal 2 UU 15/2002 jo UU 25/2003 tentang TPPU), khususnya korupsi. Atau, sekaligus sebagai organ penyidik dari unsur pegawai negeri sipil yang saling membantu dengan penyidik khusus korupsi.

Kewenangan PPATK yang relatif lemah seperti diatur pada Pasal 27 UU TPPU sangat disarankan diperkuat dalam konteks penyesuaian dengan Pasal 31 UNCAC.

Selain itu, penting dirumuskan sebuah dasar hukum pembentukan lembaga khusus yang mengelola kekayaan hasil penyitaan. Sedangkan penjabaran lebih lengkap pasal-pasal lainnya dilampirkan bersama dengan laporan ini.

Dan, sebagai sebuah laporan alternatif yang disampaikan di konferensi negara pihak ke-2 (*2<sup>nd</sup> CoSP, Confrence of States Party*) di Bali, 28 januari – 01 februari 2008, maka pemaparan diatas mempunyai arti penting untuk mengimbangi laporan pemerintah yang seringkali menekankan pada keberhasilan pemberantasan korupsi. Demi kepentingan yang jauh lebih besar ke depan, terutama *pasca* ratifikasi UNCAC dan *pasca* harmonisasi peraturan perundang-undangan dengan UNCAC, maka konsistensi pemerintah dinilai merupakan satu pondasi terpenting dalam keberhasilan perlawanan terhadap korupsi.

\* \* \*

## Bab V

# Rekomendasi

Program dan instrumen antikorupsi global yang ditransplantasi di Indonesia sejak tahun 1998, dengan menghabiskan puluhan juta dolar AS bantuan donor asing belum termasuk dana dalam negeri, belum menunjukkan pengaruh yang kuat untuk membasmi korupsi di Indonesia. Upaya-upaya untuk mendisfungsi kelembagaan antikorupsi baru semacam KPK dan Pengadilan khusus korupsi misalnya, terus menerus dilakukan, yang bisa dikatakan mengekspresikan perlawanan balik dari mereka yang mulai merasa terganggu kepentingannya. Komisi Yudisial, Komisi Kejaksaan dan Komisi Kepolisian mengalami hambatan-hambatan nyata dalam menjalankan fungsi pengawasannya karena kehadiran mereka tidak diterima dengan legawa sebagai kelembagaan penting untuk memulihkan penegakan hukum. Meskipun kinerja kelembagaan-kelembagaan antiorupsi tersebut belum menunjukkan kinerja yang maksimal.

Ini barangkali bukan masalah pada instrumen-instrumen antikorupsi global itu, karena di negara-negara lain cukup berhasil, tetapi di sini karena tidak ada kemauan politik yang kuat untuk melakukan perubahan untuk membawa kemakmuran masyarakat. Di dalam suatu kondisi negara yang diwarnai korupsi politik dan birokrasi yang sama kuatnya, memang sulit mengharap para pemuka negeri ini untuk memiliki kemauan politik untuk membasmi yang menjadi sumber utama pembiayaan politik dan birokrasi di tingkat atas.

Pasca ratifikasi UNCAC Indonesia mau tidak mau harus melakukan langkah-langkah nyata legislasi untuk memperbaharui seluruh perangkat hukum yang berkaitan dalam pemberantasan korupsi guna memenuhi paradigma, pendekatan dan cara-cara melawan korupsi secara universal. Upaya ke arah itu sekarang tengah dilakukan oleh pemerintah Indonesia.

Namun kekuatiran yang muncul adalah sebagian besar program antikorupsi itu kembali diarahkan bagi penguatan istitusi pemerintah, mulai pembentukan instistusi baru dan pembenahan manajemen instusi yang ada, dan mengabaikan penguatan institusi sosial dan perluasan koridor partisipasi politik warga. Dalam hal ini sepertinya korupsi dipandang sebagai masalah manajemen atau kegagalan pemerintahan (peradilan, birokrasi, fiskal, parlemen dll), ketimbang sebagai akibat dari ketidakseimbangan relasi antara negara, masyarakat dan bisnis. Kondisi korupsi di Indonesia yang dibangun dalam hubungan patronase politik dan bisnis, meskipun hubungan itu sudah tidak permanen dan telah terfragmentasi sejak Pemilu 1999, sepertinya sulit dipecahkan dengan hanya memodernisir pemerintah melalui penguatan kapasitas, kompetensi, dan prosedural governance.

Demokratisasi pasca era pemerintahan otoriter Seoharto, baru mempertontonkan kompetisi antara kelompok elit dalam bingkai pemilu (*electoral politic*), dan miskin partisipasi dan keterwakilan masyarakat, sehingga gagal me redistribusi sosial. Penguasaan sumberdaya ekonomi dan keuangan publik oleh elite adalah pemandangan sehari-hari baik di pemerintahan pusat maupun daerah. Karenanya, penguatan kelompok warga semestinya menjadi agenda utama pembaharuan untuk mengimbangi *electoral politic* semata, untuk menciptakan *public spaces* dimana ide dan identitas warga bisa bersaing dalam menentukan kebijakan publik.

Usulan-usulan perluasan koridor partisipasi masyarakat dalam pengawasan pemerintahan dan pemberantasan korupsi kurang mendapat dukungan dari pemerintah dan parlemen. Padahal

semestinya dalam keadaan korupsi di Indonesia reformasi antikorupsi harus didorong dari luar pemerintah. Masyarakat madani dan sektor swasta harus diberi ruang lebih besar guna menaikan tekanan eksternal untuk mendorong perubahan (politik dan ekonomi). Ide pemberantasan korupsi dari luar pemerintahan cenderung diabaikan, karena gerakan sosial antikorupsi yang sedang tumbuh dan meluas hingga ke pelosok-pelosok memang kenyataanya belum memiliki fondasi yang kuat sehingga belum berpengaruh. Sayangnya para donor dan masyarkat Internasional yang membantu Indonesia sejauh ini lebih tertarik memperkuat hubungan government to government, dan bantuan-bantuan untuk civilsociety lebih membiayai program-program jangka pendek dan berbasis issue (tematik), ketimbang membantu penguatan sumberdaya manusia dan kapasitas institusi masyarakat.

Dan, seperti telah dijelaskan pada bab sebelumnya, maka dapat dirumuskan 4 persoalan prinsipil agenda pemberantasan korupsi di Indonesia, yaitu:

1. Korupsi dan penyimpangan angggaran justru terjadi di institusi penegak hukum.  
Dapat dilihat dari CPI & Global Corruption Barometer-TI, Hasil Audit BPK, penelitian PGR-UGM, dan penelitian Indonesia Corruption Watch (ICW).
2. Disorientasi pemberantasan korupsi.  
Kompilasi dan statistik aktor korupsi memberikan gambaran bahwa sebagian besar aktor yang terungkap hanya berada di kategori bukan pelaku utama. ICW mencatat di tahun 2007, dari 175 terdakwa yang terungkap, 60, 6 % dikategorikan pada kelas bawah. Temuan ini menegaskan bahwa agenda pemberantasan korupsi di Indonesia tidak memberikan efek jera terhadap pelaku dan pihak yang berpotensi menjadi pelaku.
3. Pernyataan, tindakan dan kebijakan kontroversial dari pejabat publik yang berperan besar terhadap agenda pemberantasan korupsi.  
Beberapa pernyataan tersebut dinilai berpotensi melemahkan agenda pemberantasan korupsi. Presiden dan Wakil Presiden Republik Indonesia yang mengkampanyekan isu anti korupsi sebagai agenda inti pemerintahannya 2004-2009, justru seringkali melakukan dan mengeluarkan pernyataan yang kontra-produktif terhadap usaha pemberantasan korupsi yang sedang berjalan. Hal ini menunjukkan adanya inkonsistensi pemerintahan SBY-Kalla untuk agenda anti-korupsi di Indonesia.
4. Delegitimasi Institusi Pemberantasan Korupsi  
Upaya pelemahan dengan tujuan mendelegitimasi institusi pemberantasan korupsi setidaknya terlihat pada pengajuan Judicial Review UU Komisi Yudisial, dan beberapa tindakan yang melemahkan eksistensi Komisi Pemberantasan Korupsi.
5. Inti dari empat kelemahan dan persoalan agenda pemberantasan korupsi diatas mengarah pada bentuk Kamufase Kebijakan Anti Korupsi dan Pemberantasan Korupsi.

Berdasarkan kelemahan di atas dan analisis kelembagaan yang dilakukan pada independent report, maka dapat direkomendasikan beberapa poin tambahan, yaitu:

1. Terhadap Komisi Pemberantasan Korupsi (KPK)
  - a. KPK perlu mengembangkan mekanisme pelibatan civil society untuk memberikan input terkait dengan penentuan skala prioritas penanganan perkara di KPK.
  - b. Revisi terhadap Undang Undang KPK harus dilihat dari konteks politik kekinian agar KPK tidak terperangkap pada upaya pelemahan sistematis dengan menggunakan revisi Undang Undang KPK sebagai pintu masuk.
  - c. Secara internal, KPK perlu mengembangkan mekanisme kontrol di antara para pimpinannya.

2. Terhadap Komisi Yudisial
  - a. Komisi Yudisial perlu memberikan ruang partisipasi publik yang lebih luas untuk mengajukan masukan dan saran yang berhubungan dengan kewenangan Komisi Yudisial untuk memeriksa dan megawasi etika & perilaku hakim.
  - b. Masyarakat sipil perlu melakukan pemantauan yang ketat terhadap proses pengajuan dan pembahasan revisi UU Komisi Yudisial.
3. Terhadap Kejaksaan
  - a. Perlunya dilakukan peninjauan ulang terhadap penentuan skala prioritas penanganan kasus korupsi yang dilakukan oleh kejaksaan. Hal ini sangat berhubungan dengan lebih sedikitnya pelaku-pelaku utama korupsi yang diproses di Kejaksaan. Penentuan skala prioritas penanganan kasus korupsi akan berkorelasi dengan seberapa besar agenda pemberantasan korupsi yang dilakukan kejaksaan memberikan efek jera yang efektif.
  - b. Masyarakat sipil harus lebih intens dalam mencermati proses rekrutmen, promosi, mutasi, standar minimum profesi, kode perilaku, dan sistem pengawasan di tubuh kejaksaan.
  - c. Mendorong kejaksaan untuk memperbaiki mekanisme penanganan uang pengganti dari hasil korupsi dan pengelolaan uang sitaan. Upaya ini harus diletakkan pada kerangka penguatan sistem akuntabilitas dan transparansi di tubuh kejaksaan.
  - d. Kejaksaan harus memastikan bahwa program pembaharuan institusi yang telah disusun Kejaksaan dapat diterapkan dengan konsisten.
  - e. Pemantauan masyarakat sipil perlu juga diarahkan pada kejaksaan ketika menangani kasus-kasus dengan bobot politik yang tinggi.
  - f. Semua pihak mendorong dan mendukung kejaksaan untuk terus memproses kasus Soeharto, baik di jalur pidana atau pun jalur perdata.
4. Selain rekomendasi yang berhubungan langsung dengan institusi penegak hukum, perlu mulai dikaji ulang kelemahan-kelemahan utama mekanisme seleksi pejabat publik, terutama pejabat publik di bidang penegakan hukum, yang melibatkan DPR. Kajian ini perlu dilakukan terkait dengan kemungkinan dampaknya terhadap efektivitas dan independensi lembaga-lembaga penegak hukum dalam pemberantasan korupsi.
5. Dalam kultur birokrasi yang paternalistik seperti di Indonesia, sebaiknya para pejabat publik bisa menahan diri untuk tidak mengeluarkan pernyataan kepada publik yang cenderung melemahkan semangat pemberantasan korupsi. Sebaliknya, pernyataan kontra-produktif tersebut hanya akan memperkuat kesan publik, bahwa pemerintah memang benar-benar tidak serius dalam memberantas korupsi.

\* \* \*

Lampiran 1

**Penyelesaian Temuan Kerugian Negara sampai dengan TA Semester I 2007**

| Klasifikasi                    | Jumlah Kasus | Mata Uang | Nilai Temuan Kerugian Negara (KN) |                   | KN yang Diselesaikan (Rp. miliar) | Persentase Penyelesaian |
|--------------------------------|--------------|-----------|-----------------------------------|-------------------|-----------------------------------|-------------------------|
|                                |              |           | Dalam berbagai mata uang          | Dalam miliar Rp.  |                                   |                         |
|                                |              |           |                                   |                   |                                   |                         |
| Perbendaharaan                 | 424          | Rp.       | 134,13 miliar                     | 134,130           | 1,59                              | 1,18%                   |
|                                |              | US\$      | 960,09 ribu                       | 9,229             | --                                | --                      |
| Pegawai Negeri Bukan Bendahara | 3.750        | Rp.       | 545,94 miliar                     | 545,940           | 95,92                             | 17,60%                  |
|                                |              | US\$      | 4,34 juta                         | 41,725            | --                                | --                      |
|                                |              | ¥         | 629,68 juta                       | 5.286,189         | --                                | --                      |
|                                |              | FFR       | 37,164 juta                       | 306,586           | --                                | --                      |
|                                |              | C\$       | 94,96 ribu                        | 0,956             | --                                | --                      |
|                                |              | NLG       | 2,97 juta                         | 12,400            | --                                | --                      |
|                                |              | DM        | 1,83 juta                         | 5,518             | --                                | --                      |
|                                |              | AUS\$     | 576,78 ribu                       | 5,095             | --                                | --                      |
|                                |              | EURO      | 32,52 ribu                        | 0,450             | --                                | --                      |
|                                |              |           |                                   |                   |                                   |                         |
| Atas tanggungjawab Pihak ke-3  | 1.543        | Rp.       | 7,69 triliun                      | 7690              | 879,12                            | 11,40%                  |
|                                |              | US\$      | 1,56 juta                         | 14,998            | --                                | --                      |
|                                |              |           |                                   |                   |                                   |                         |
| <b>TOTAL</b>                   | <b>5.717</b> |           |                                   | <b>14.053,216</b> | <b>976,63</b>                     | <b>6,95%</b>            |

Sumber: Dokumen ICW (Diolah dari Ikhtisar Hasil Pemeriksaan BPK Semester I Tahun Anggaran 2007)

## Lampiran 2: Skema Aliran Suap Dana Bank Indonesia

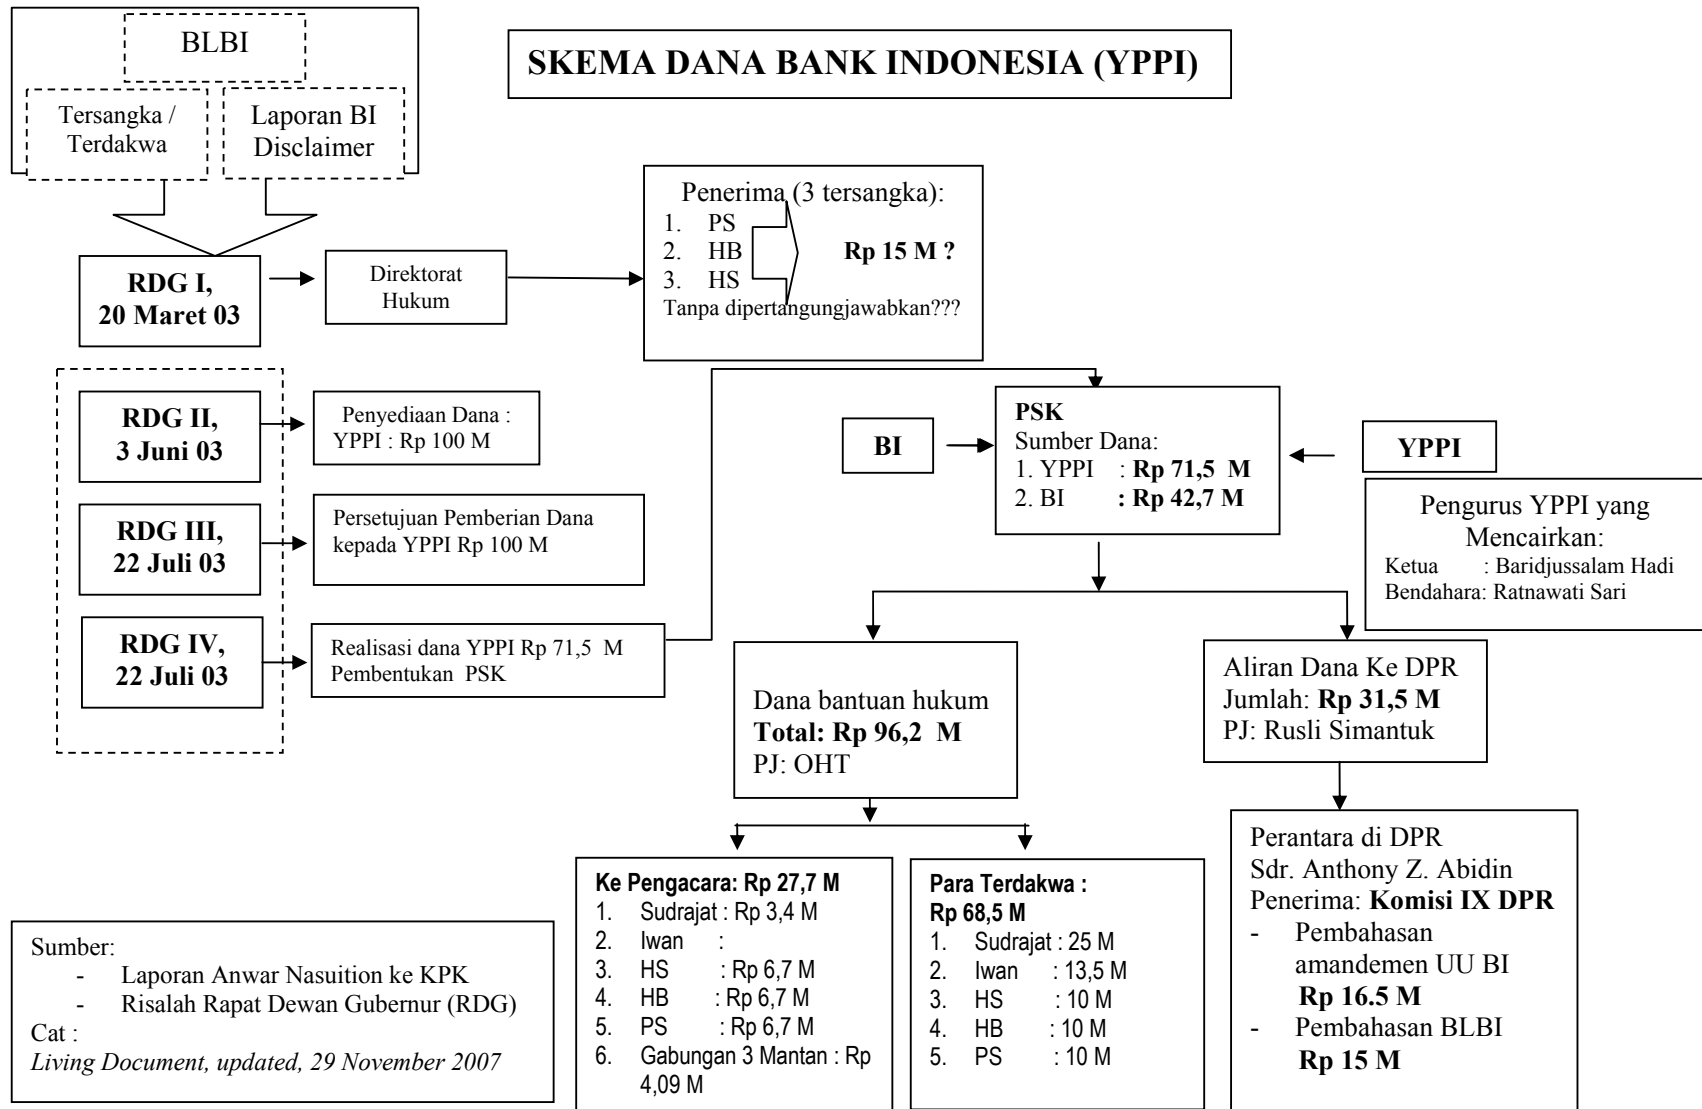

| <b>Rapat Dewan Gubernur BI (RDG)</b> | <b>Keputusan RDG</b>                                                                                                                                                                                                                                                                                                                                                                 | <b>Dewan Gubernur BI yang menandatangani</b>                                                                                                                                                                                                                                                                                                           |
|--------------------------------------|--------------------------------------------------------------------------------------------------------------------------------------------------------------------------------------------------------------------------------------------------------------------------------------------------------------------------------------------------------------------------------------|--------------------------------------------------------------------------------------------------------------------------------------------------------------------------------------------------------------------------------------------------------------------------------------------------------------------------------------------------------|
| RDG I (20 Maret 2003)                | <ul style="list-style-type: none"> <li>- Menyetujui Permohonan 3 terdakwa untuk memberikan bantuan Rp 15 M,</li> <li>- Masing-masing diberikan Rp 5 miliar</li> </ul>                                                                                                                                                                                                                | <ol style="list-style-type: none"> <li>1. Sahril Sabirin</li> <li>2. Anwar Nasution</li> <li>3. Miranda Gultom</li> <li>4. Maulana Ibrahim</li> <li>5. Bunbunan Hutapea</li> <li>6. Maman Sumantri</li> <li>7. Oey Hoey Tiong</li> </ol>                                                                                                               |
| RDG II (3 Juni 2003)                 | <ul style="list-style-type: none"> <li>- Meminta Dewan Pengawas LPPI untuk menyediakan dana RP 100 miliar</li> <li>- Tahap I : RP 50 miliar</li> <li>- Menunjuk AP dan BBH untuk melaksanakan keputusan RDG ke pengurus YPPI</li> </ul>                                                                                                                                              | <ol style="list-style-type: none"> <li>1. Burhanuddin Abdullah</li> <li>2. Aulia Pohan</li> <li>3. Bunbunan Hutapea</li> <li>4. Aslim Tadjudin</li> <li>5. Roswita Roza (Direktorat Hukum)</li> </ol>                                                                                                                                                  |
| RDG III (22 Juli 2003)               | Persetujuan bahwa BI akan beri bantuan peningkatan modal pada YPPI sebesar Rp 100 M                                                                                                                                                                                                                                                                                                  | <ol style="list-style-type: none"> <li>1. Burhanudin Abdullah</li> <li>2. Anwar Nasution</li> <li>3. Aulia Pohan</li> <li>4. Maulana Ibrahim</li> <li>5. Bunbunan Hutapea</li> <li>6. Maman Soemantri</li> <li>7. Aslim Tadjuddin</li> <li>8. Roswita Rosa (Direktorat Hukum)</li> <li>9. Rusli Simanjuntak</li> <li>10. Purwantari Budiman</li> </ol> |
| RDG IV (22 Juli 2003)                | <p>Keputusan realisasi dana Rp 71,5 miliar (Yaitu Rp 100 miliar dikurangi jumlah yang telah disetujui dewan pengawas LPPI untuk ditarik, Rp 28,5 miliar)</p> <p>Membentuk Panitia Pengembangan Sosial Kemasyarakatan guna melakukan beberapa hal :</p> <ol style="list-style-type: none"> <li>1. Penarikan</li> <li>2. Penggunaan</li> <li>3. Penatausahaan Dana Tersebut</li> </ol> | <ol style="list-style-type: none"> <li>1. Burhanuddin Abdullah</li> <li>2. Anwar Nasution</li> <li>3. Maulana Ibrahim</li> <li>4. Bunbunan Hutapea</li> <li>5. Aslim Tadjuddin</li> <li>6. Maman Soemantri</li> <li>7. Aulia Pohan</li> <li>8. Roswita Rosa</li> </ol>                                                                                 |

|  |  |                                                |
|--|--|------------------------------------------------|
|  |  | 9. Rusli Simanjuntak<br>10. Purwantari Budiman |
|--|--|------------------------------------------------|

| <b>Struktur Kepengurusan dan Tugas PSK</b> |                                                                                                                                                                                                                                                                                                                                                                                                                         |
|--------------------------------------------|-------------------------------------------------------------------------------------------------------------------------------------------------------------------------------------------------------------------------------------------------------------------------------------------------------------------------------------------------------------------------------------------------------------------------|
| <b>Koordinator</b>                         | Aulia Pohan (ex-officio)                                                                                                                                                                                                                                                                                                                                                                                                |
|                                            | Maman H. Somantri (ex-officio)                                                                                                                                                                                                                                                                                                                                                                                          |
| <b>Ketua</b>                               | Rusli Simanjuntak (ex-officio)                                                                                                                                                                                                                                                                                                                                                                                          |
| <b>Wakil Ketua</b>                         | Oey Hoey Tiong (ex-officio)                                                                                                                                                                                                                                                                                                                                                                                             |
| <b>Administrator</b>                       | Pejabat minimal GV yang ditunjuk dan ditetapkan oleh pengurus PSK                                                                                                                                                                                                                                                                                                                                                       |
|                                            |                                                                                                                                                                                                                                                                                                                                                                                                                         |
| <b>Masa Tugas</b>                          | 1 tahun setelah keputusan RDG IV                                                                                                                                                                                                                                                                                                                                                                                        |
|                                            |                                                                                                                                                                                                                                                                                                                                                                                                                         |
| <b>Tujuan PSK</b>                          | <ol style="list-style-type: none"> <li>1. melakukan kajian, upaya dan kegiatan yang bersifat social kemasyarakatan</li> <li>2. melakukan riset dan penulisan buku</li> <li>3. mengembangkan dan diseminasi kebijakan moneter dan perbankan</li> <li>4. mengembangkan dan melakukan comdev</li> <li>5. melakukan upaya dan kegiatan lain yang bersifat social kemasyarakatan sesuai penugasan coordinator PSK</li> </ol> |

Sumber: Dokumen Indonesia Corruption Watch (ICW)



## Lampiran 3

**Rekapitulasi 680 Rekening Liar yang Dapat Tercatat**

| No. | Kementerian/Lembaga                        | Rekening Giro |                           | Rekening Deposito |                           |
|-----|--------------------------------------------|---------------|---------------------------|-------------------|---------------------------|
|     |                                            | Jumlah        | Nilai (Dalam juta rupiah) | Jumlah            | Nilai (Dalam juta rupiah) |
| 1.  | Bappenas                                   | 9             | 4.889,27                  |                   |                           |
| 2.  | Batan                                      | 2             | 169,33                    |                   |                           |
| 3.  | BP Migas                                   | 4             | 116.416,04                |                   |                           |
| 4.  | BPPT                                       | 24            | 6.961,06                  |                   |                           |
| 5.  | BPS                                        | 2             | 53,74                     |                   |                           |
| 6.  | BRR Aceh dan Nias                          | 3             | 50.202,60                 |                   |                           |
| 7.  | Departemen Agama                           | 75            | 2.890.807,79              | 17                | 929.012,89                |
| 8.  | Kementerian Budaya dan Pariwisata          | 3             | 11,89                     | 88                | 217,58                    |
| 9.  | Departemen Perdagangan                     | 2             | 481,61                    |                   |                           |
| 10. | Departemen Dalam Negeri                    | 10            | 25.257,69                 | 5                 | 250,00                    |
| 11. | Departemen Pendidikan Nasional             | 15            | 4.150,48                  |                   |                           |
| 12. | Departemen Pertahanan                      | 96            | 1.832.713,75              | 40                | 14.594,06                 |
| 13. | Departemen Perhubungan                     | 7             | 1.042,77                  |                   |                           |
| 14. | Departemen Hukum dan HAM                   | 36            | 29.568,65                 | 46                | 19.913,00                 |
| 15. | Departemen Kehutanan                       | 34            | 311.570,48                | 6                 | 8.012,59                  |
| 16. | Departemen Kesehatan                       | 49            | 93.561,02                 | 4                 | 289,00                    |
| 17. | Departemen Pemukiman dan Prasarana Wilayah | 7             | 443,94                    |                   |                           |
| 18. | Departemen Komunikasi dan Informatika      | 3             | 42,49                     |                   |                           |
| 19. | Departemen Keuangan                        | 88            | 1.062.265,74              | 172               | 64.627,29                 |
| 20. | Departemen Luar Negeri                     | 23            | 349.456,83                | 2                 | 200,00                    |
| 21. | Departemen Tenaga Kerja                    | 13            | 15.636,57                 | 24                | 120.509,20                |
| 22. | Departemen Perindustrian                   | 5             | 2.730,95                  |                   |                           |
| 23. | Departemen Sosial                          | 9             | 11.780,96                 |                   |                           |
| 24. | Departemen Pertanian                       | 6             | 1.162,20                  |                   |                           |

|     |                                         |            |                     |            |                     |
|-----|-----------------------------------------|------------|---------------------|------------|---------------------|
| 25. | Departemen Kelautan dan Perikanan       | 7          | 547,84              |            |                     |
| 26. | Departemen ESDM                         | 19         | 30.686,40           | 198        | 36.637,45           |
| 27. | Kejaksaan                               | 6          | 258.141,87          | 1          | 1.329,00            |
| 28. | Kementerian Lingkungan Hidup            | 2          | 74,12               |            |                     |
| 29. | LIPI                                    | 1          | 98,75               |            |                     |
| 30. | Mahkamah Agung                          | 4          | 4.877,63            | 5          | 2.581,00            |
| 31. | Kementerian Negara Koperasi dan UKM     | 3          | 5.715,07            |            |                     |
| 32. | Kementerian Negara Pemuda dan Olah Raga | 3          | 84,91               |            |                     |
| 33. | Kementerian Riset dan Teknologi         | 1          | 1.705,71            |            |                     |
| 34. | Otorita Batam                           | 1          | 273,85              |            |                     |
| 35. | Kepolisian Republik Indonesia           | 108        | 105.679,74          | 15         | 119.299,00          |
|     | <b>Total</b>                            | <b>680</b> | <b>7.219.263,74</b> | <b>623</b> | <b>1.317.472,06</b> |
|     |                                         |            |                     |            |                     |

Sumber: Dokumen Indonesia Corruption Watch (ICW)

Lampiran 4

**Daftar Utang Delapan Debitor BLBI**

**Daftar Utang Delapan Debitor BLBI**

| No | Debitor             | Bank Penerima BLBI    | Jumlah Utang<br>(dalam miliar Rp.) |
|----|---------------------|-----------------------|------------------------------------|
| 1. | Marimutu Sinivasan  | Bank Putra Multikarsa | 1.130,00                           |
| 2. | Ulung Bursa         | Bank Lautan Berlian   | 615,44                             |
| 3. | Atang Latief        | Bank Indonesia Raya   | 325,45                             |
| 4. | Lidia Muchtar       | Bank Tamara           | 202,80                             |
| 5. | Omar Putirai        | Bank Tamara           | 190,17                             |
| 6. | Adisaputra Januardy | Bank Namura Yasonta   | 123,04                             |
| 7. | James Januardy      | Bank Namura Yasonta   | 123,04                             |
| 8. | Agus Anwar          | Bank Pelita           | 1.900,00                           |

Sumber : Koran Tempo, 15 April 2007 dan Kompas, 1 Mei 2007

Lampiran 5

**Daftar Beberapa Perkara Korupsi yang Dihentikan Penyidikannya oleh Kejaksaan**

| No | Tersangka                                              | Perkara Korupsi                                                    | Perkiraan Kerugian Negara        |
|----|--------------------------------------------------------|--------------------------------------------------------------------|----------------------------------|
| 1  | Ginjar Kartasmita, Praptono Honggopati                 | Technical Assistance Contract (TAC) Pertamina dengan PT Ustrind.   | US\$ 24,8 juta                   |
| 2  | Sjamsul Nursalim                                       | BLBI                                                               | Rp. 10 triliun                   |
| 3  | Prajogo Pangestu                                       | Proyek Penanaman Hutan oleh PT. MHP                                | Rp 331 miliar                    |
| 4  | Bustanil Arifin                                        | Bulog                                                              | Rp14,8 miliar                    |
| 5  | Johanes Kotjo, Robby Djohan Tjahjadi                   | Kredit Bapindo –Kanindotex                                         | Rp 300 miliar                    |
| 6  | Marimutu Sinivasan                                     | Kredit PT Texmaco                                                  | Rp 1,8 triliun                   |
| 7  | Djoko Ramiadji                                         | Penerbitan Commercial Paper oleh PT. Utama Karya untuk proyek JORR | US\$105 juta dan Rp181,35 milyar |
| 8  | Tantri Abeng                                           | JITC/ Pelindo II                                                   | Rp 12,9 miliar                   |
| 9  | Ir Bambang Pujianto                                    | Lemigas                                                            | Rp 7,1 miliar                    |
| 10 | Siti Hardijanti Rukmana, Faisal Ab'daoe, Rosano Barack | Proyek Pipanisasi di Jawa                                          | US\$ 20,4 juta                   |

Sumber : Republika, 14 Januari 2005

Lampiran 6

**Daftar Beberapa Vonis Uang Pengganti Kerugian Negara**

(putusan *inkracht* )

| No | Terpidana             | Perkara                                      | Uang Pengganti<br>Dalam miliar Rp. |
|----|-----------------------|----------------------------------------------|------------------------------------|
| 1  | Hendra Rahardja       | Korupsi BLBI Bank BHS                        | 1.300,00                           |
| 2  | Bob Hasan             | Korupsi Pemotreta dan Pemetaan Hutan Lindung | 1.930,00                           |
| 3  | Samadikun Hartono     | Korupsi BLBI Bank Modern                     | 179,00                             |
| 4  | Sudjiono Timan        | Korupsi BPUI                                 | 369,00                             |
| 5  | David Nusa Widjaja    | BLBI Bank Servitia                           | 1.300,00                           |
| 6  | Eddy Tansil           | Korupsi BAPINDO                              | 1.800,00                           |
| 7  | Adrian Waworuntu      | Korupsi Bank BNI                             | 301,00                             |
| 8  | Thamrin Tanjung       | --                                           | 20,00                              |
| 9  | Lee Darmawan          | --                                           | 5,26                               |
| 10 | Dicky Iskandar Dinata | Korupsi Bank Duta                            | 800,00                             |
| 11 | Hartono Tjahjajaja    | Korupsi BRI                                  | 55,23                              |
|    | <b>TOTAL</b>          |                                              | <b>Rp 8.059</b>                    |

**Sumber :** Koran Tempo (22 Maret 2002, 22 Juli 2005), Sinar Harapan (21 Februari 2004, 3 September 2007), Kompas (5 Desember 2004, 1 Februari 2005), Hukumonline (6 Februari 2006), Pikiran Rakyat (14 Januari 2007)

Lampiran 7

**Daftar Tersangka/Terdakwa/Terpidana Korupsi yang dilaporkan Buron Pasca Ratifikasi UNCAC**

| No | Nama                    | Perkara Korupsi/<br>kerugian negara                                       | Keterangan                                                       |
|----|-------------------------|---------------------------------------------------------------------------|------------------------------------------------------------------|
| 1  | Marimutu Sinivasan      | Kredit Macet Bank Muamalat<br>Rp 20 miliar                                | diduga kabur 15 Maret 2006<br>ke India                           |
| 2  | Tabrani Ismail          | proyek Export Oriented<br>Refinery (Exor) I Pertamina<br>USD 189,58 juta  | diduga kabur April 2006<br>Dan sudah ditangkap pada awal<br>2007 |
| 3  | Nadher Taher            | korupsi di Bank Mandiri senilai<br>Rp 24 miliar                           | diduga Mei 2006                                                  |
| 4  | SH, HH, IH, GS, dan TWW | korupsi sewa aset BPPN yang<br>dilakukan PT Mitra senilai Rp<br>60 miliar | diduga kabur Agustus 2006 ke<br>Singapura                        |

Sumber : Jawa Pos (7 Juni 2007), Bali Pos (27 April 2007, 19 November 2007) , Koran Tempo (5 Oktober 2007)

Catatan: jika jumlah halaman dinilai terlalu banyak, lampiran juga dapat hanya mencakup bagian C, tentang STATISTIK PERKARA DAN TERDAKWA

#### Lampiran 8

Daftar Perkara Korupsi yang Telah Diperiksa dan Diputus Pengadilan (Umum) Selama Tahun 2007

| No | Perkara Korupsi                                                          | Kerugian Negara | Terdakwa                                                                                                                                                                                                 | Hakim                               | Pengadilan                           | Vonis                                             | Waktu           |
|----|--------------------------------------------------------------------------|-----------------|----------------------------------------------------------------------------------------------------------------------------------------------------------------------------------------------------------|-------------------------------------|--------------------------------------|---------------------------------------------------|-----------------|
| 1. | Dana bantuan pembangunan Rumah Sakit Al Ihsan di Baleendah Kab. Bandung. | Rp 17 miliar    | Mantan Sekda Jawa Barat periode 1994-1998 Drs. H. Ragam Santika                                                                                                                                          | -                                   | Mahkamah Agung                       | 2 tahun penjara                                   | 8 Januari 2007  |
| 2. | Proyek bantuan Tempat Pembuangan Akhir (TPA) sampah Bantar Gebang        | Rp 1,3 miliar   | Aos Kaosar, staf khusus Wali Kota Bekasi                                                                                                                                                                 | Syafruddin Nasution                 | Pengadilan Negeri Bekasi             | Bebas<br><u>Tuntutan Jaksa</u><br>5 tahun penjara | 10 Januari 2007 |
| 3. | Proyek bantuan Tempat Pembuangan Akhir (TPA) sampah Bantar Gebang        | Rp 1,3 miliar   | Wahyu Mulyana dan Bagas Subarnowo (dua staf Aos Kaosar)                                                                                                                                                  | Syafruddin Nasution                 | Pengadilan Negeri Bekasi             | 2 tahun penjara                                   | 10 Januari 2007 |
| 4. | Anggaran Pendapatan dan Belanja Kota Malang tahun 2001                   | Rp 2,1 miliar   | Wakil Wali Kota Malang Bambang Priyo Utomo                                                                                                                                                               | Burhanuddin                         | Pengadilan Negeri Malang, Jawa Timur | Bebas                                             | 12 Januari 2007 |
| 5. | Anggaran Pendapatan dan Belanja Kota Malang tahun 2001                   | Rp 2,1 miliar   | mantan Wakil Ketua DPRD Kota Malang, Oetoyo Sarjito dan Ahmad Syafii                                                                                                                                     |                                     | Pengadilan Negeri Malang, Jawa Timur | Bebas                                             | Januari 2007    |
| 6. | Dana purnabhakti anggota DPRD Hulu Sungai Selatan periode 1999-2004      | Rp 1,7 miliar   | mantan ketua dewan Mukhyar Mukhtar dan HM Yunanie                                                                                                                                                        | Sobandi SH, Agung SH, dan Pandji SH | Pengadilan Negeri Kandangan Kalsel   | Bebas                                             | Januari 2007    |
| 7. | APBD Kota Bengkulu TA 2004                                               | Rp.509 juta     | Tujuh mantan anggota DPRD Kota Bengkulu priode 1999-2004 (Ir. Ibrahim Ratin, H. Mawardi Hasyim, BA, R. Nawawi Simil, SH, Edi Agusdin, S.Sos, Dazrul Aini, S.Sos, Ir. Syahrul Badri, dan H. Syamsul Hadi) | Mabruq Nur                          | Pengadilan Negeri Bengkulu           | 6 bulan penjara                                   | 19 Januari 2007 |

| No  | Perkara Korupsi                                                                                       | Kerugian Negara  | Terdakwa                                                                                                           | Hakim                                                                               | Pengadilan                    | Vonis                                                                 | Waktu           |
|-----|-------------------------------------------------------------------------------------------------------|------------------|--------------------------------------------------------------------------------------------------------------------|-------------------------------------------------------------------------------------|-------------------------------|-----------------------------------------------------------------------|-----------------|
| 8.  | APBD Bali periode 2000-2004                                                                           | Rp 11 miliar     | Ketua DPRD Bali Ida Bagus Putu Wesnawa                                                                             | Putu Widnya, SH, Firman Tambunan, SH, I Wayan Merta, SH                             | Pengadilan Negeri Denpasar    | Lepas (onslag)                                                        | 8 Januari 2007  |
| 9.  | APBD Kota Denpasar 2001-2004                                                                          | Rp 43 miliar     | mantan Ketua DPRD Kota Denpasar Sukita                                                                             | Nyoman Gde Wirya, Edi Parulian Siregar, Made Sudani, SH                             | Pengadilan Negeri Denpasar    | Bebas                                                                 | 8 Januari 2007  |
| 10. | APBD Kabupaten Badung                                                                                 | Rp 31 miliar     | mantan Ketua DPRD Badung Ida Bagus Suryatmaja                                                                      | Nyoman Gde Wirya, Edi Parulian Siregar, Made Sudani, SH                             | Pengadilan Negeri Denpasar    | Bebas                                                                 | 8 Januari 2007  |
| 11. | APBD Kabupaten Ciamis tahun 2001-2002                                                                 | Rp 5,2 miliar    | Akhmad Dimiyati, Wakil Wali Kota Banjar non-aktif dan Taufik anggota DPRD Kabupaten Ciamis.                        | Dr. Harifin A. Tumpa, S.H., M.H., I Made Tara, S.H., dan Prof. Dr. H. Muchsin, S.H. | Pengadilan Tinggi Jawa Barat  | 4 tahun penjara                                                       | 18 Januari 2007 |
| 12. | Impor beras ilegal 60.000 ton dari Vietnam                                                            | Rp 25,413 miliar | Sumantri dan Athan Carina                                                                                          |                                                                                     | Pengadilan Tinggi DKI Jakarta | 1 tahun 2 bulan penjara                                               | 10 Januari 2007 |
| 13. | Impor beras ilegal 60.000 ton dari Vietnam                                                            | Rp 25,413 miliar | Yamiral Azis Santoso dan Wahjono (Mantan Pejabat Bea Cukai)                                                        |                                                                                     | Pengadilan Tinggi DKI Jakarta | Bebas<br><u>Tuntutan JPU</u><br>10 tahun penjara.                     | 10 Januari 2007 |
| 14. | Proyek pembebasan tanah dan ganti rugi jalan masuk menuju Masjid Agung Jawa Tengah atau MAJT tahap II | Rp 510 juta      | Hartopo, staf Kelurahan Siwalan, Semarang, dan M Ali Faizin, mantan Lurah Sambirejo, Kecamatan Gayamsari, Semarang | Moch Effendi Murod                                                                  | Pengadilan Negeri Semarang    | M Ali Faizin<br>1 tahun 6 bulan penjara<br>Hartopo<br>1 tahun penjara | 22 Januari 2007 |
| 15. | Beasiswa Wali Kota Semarang Tahun 2003                                                                | Rp 253,313 juta  | Sujoko, mantan Kadinas Pendidikan Kota dan Heru Supriyono, mantan Wakadinas                                        | Suwardi, Eko Wardoyo dan H Sukarno Muljo                                            | Pengadilan Tinggi Semarang    | 1 tahun penjara                                                       | 31 Januari 2007 |
| 16. | Beasiswa Wali Kota Semarang Tahun 2003                                                                | Rp 253,313 juta  | Wakil Sekretaris PDI-P Julius Basiwantoro, dan Wakil Bendahara PDI-P Untung S                                      | Suwardi, Eko Wardoyo dan H Sukarno Muljo                                            | Pengadilan Tinggi Semarang    | 1 tahun penjara                                                       | 31 Januari 2007 |
| 17. | Dana Purna Tugas DPRD Kota Yogyakarta                                                                 | Rp. 3 miliar     | Bahtanisyar Basyir, mantan anggota DPRD                                                                            | Widodo, SH., Pujo Unggul SH., Sinung Hernawan SH.                                   | PN Yogyakarta                 | 4 tahun penjara                                                       | 15 Januari 2007 |
| 18. | Dana Dikbudpar Kota Bima                                                                              | Rp 200 juta      | Kepala BPKD Drs. H Abdul Djalil                                                                                    | Slamet Setyo Utomo                                                                  | Pengadilan Negeri             | Bebas                                                                 | 23 Februari     |



| No  | Perkara Korupsi                                                                    | Kerugian Negara   | Terdakwa                                                                                                           | Hakim                                                                                                              | Pengadilan                        | Vonis           | Waktu            |
|-----|------------------------------------------------------------------------------------|-------------------|--------------------------------------------------------------------------------------------------------------------|--------------------------------------------------------------------------------------------------------------------|-----------------------------------|-----------------|------------------|
|     |                                                                                    |                   | AR                                                                                                                 |                                                                                                                    | Bima                              |                 | 2007             |
| 19. | Pembuatan Negotiable Certificate Deposito (NCD) PT. Bank Swansarindo Internasional | Rp 51, 95 miliar  | Mohammad Romli Dalim, Kepala KPO PT. Bank Swansarindo Internasional                                                | Muhammad Taufik, Atja Sondjaja, dan I Made Tara, SH.                                                               | Mahkamah Agung                    | Bebas           | 21 Februari 2007 |
| 20. | Pengadaan komputer                                                                 | -                 | Kepala Dinas Pendidikan Nasional Kabupaten Muaraenim Drs H Agung Budi MPd dan pimpinan proyek Yulini SH            |                                                                                                                    | Pengadilan Negeri Muaraenim       | Bebas           | Februari 2007    |
| 21. | Pembelian surat utang jangka menengah (medium term notes)                          | Rp 311 miliar     | mantan Direktur Utama PT Jamsostek Ahmad Djunaidi                                                                  | Iskandar Kamil, Rehngena Purba dan Artidjo Alkostar                                                                | Mahkamah Agung                    | 8 tahun penjara | 6 Februari 2007  |
| 22. | APBD DPRD Bengkulu Utara (2001-2004)                                               | Rp12, 7 milyar    | Tiga puluh dua terdakwa korupsi DPRD Bengkulu Utara                                                                | Sigit Sutanto,SH. dengan anggota Syamsul Arief, SH., Hariono,SH, A. Irfir Rachman, SH dan Rozana Irawati, SH.      | Pengadilan Negeri Bengkulu Utara  | Bebas           | 22 Februari 2007 |
| 23. | Renovasi Hotel Patra Jasa Bali                                                     | Rp 69 miliar      | mantan Dirut PT Patra Jasa, Tony Purbowo                                                                           | -                                                                                                                  | Pengadilan Negeri Jakarta Selatan | Bebas           | Februari 2007    |
| 24. | Pengelolaan perkebunan kelapa sawit seluas 47.000 hektar yang dikelola PT Torganda | Rp 323,655 miliar | DL Sitorus                                                                                                         | Parman Soeparman SH dan hakim anggota Djoko Sarwoko SH, Bahaudin Qoudry SH, Mieke Komar SH dan Artidjo Alkostar SH | Mahkamah Agung                    | 8 tahun penjara | 12 Februari 2007 |
| 25. | Projek Geographic Information System (GIS)                                         | Rp 426,76 juta    | Ir. Dwino Priyapahwantara, selaku pimpinan projek (pimpro) GIS dan Ir. Made Astana, Direktur PT Global Mantra (GM) | H. Hasby Junaedi Tolib, S.H., M.H. dan didampingi dua hakim anggota, Masrul, S.H. dan Yusrizal, S.H.               | Pengadilan Negeri Indramayu       | Bebas           | 7 Februari 2007  |

| No  | Perkara Korupsi                                                                                                     | Kerugian Negara | Terdakwa                                                                                                                                              | Hakim                                   | Pengadilan                                 | Vonis                       | Waktu            |
|-----|---------------------------------------------------------------------------------------------------------------------|-----------------|-------------------------------------------------------------------------------------------------------------------------------------------------------|-----------------------------------------|--------------------------------------------|-----------------------------|------------------|
| 26. | Bantuan tidak terduga Anggaran Pendapatan dan Belanja Daerah Kabupaten Ciamis tahun 2003-Maret 2004,                | Rp 1,313 miliar | Oma Sasmita, mantan Bupati Ciamis, dan Dedi Ahmad Riswandi, yang juga mantan Sekretaris Daerah Kabupaten Ciamis.                                      | Saparudin Hasibuan                      | Pengadilan Negeri Ciamis                   | 2 tahun penjara             | 28 Februari 2007 |
| 27. | Dana perumahan dan tunjangan DPRD Banten 2004                                                                       | Rp 14 miliar    | Udin Janahudin, Robert Witaharja, Mukhlis Toyib dan Marzuki Raili (mantan anggota DPRD Banten)                                                        | Yuferri Rangka                          | Pengadilan Negeri Serang,                  | Bebas (dakwaan jaksa kabur) | 7 Februari 2007  |
| 28. | Penyalahgunaan fasilitas direksi PT Pupuk Kalimantan Timur                                                          | -               | Omay K Wiraatmadja.                                                                                                                                   | Sri Mulyani Sulthoni<br>Johanes Suhadi. | Pengadilan Negeri Jakarta Selatan          | Bebas                       | 23 Februari 2007 |
| 29. | Suap yang dilakukan oleh Ahmad Djunaidi, terdakwa kasus korupsi di PT Jamsostek, melalui saksi Aan Hadie Gusnantho. | -               | Jaksa Cecep Sunarto dan Burdju Ronni Allan Felix                                                                                                      | Syafrullah Sumar                        | Pengadilan Negeri Jakarta Selatan          | 1 tahun 8 bulan penjara     | 27 Februari 2007 |
| 30. | Pencairan letter of credit fiktif BNI Cabang Kebayoran Baru.                                                        | -               | Dicky Iskandar Di Nata. Direktur Utama PT Brocolin Internasional                                                                                      | Artidjo Alkostar                        | Mahkamah Agung                             | 20 tahun penjara            | 22 Februari 2007 |
| 31. | Penjualan aset PTPN 2 seluas 78,16 hektare di Desa Dagang Kerawang, Tanjung Morawa, Deliserdang.                    | Rp11 miliar     | Pemilik Yayasan Pendidikan Nurul Amaliyah (YPNA) Suprianto alias Anto Keling, Direktur SDM PTPN 2 Masdin Sipayung, dan Kabag Umum PTPN 2 Indro Suwito | Sama Raja Marpaung                      | Majelis Hakim Pengadilan Negeri Lubukpakam | Bebas                       | 28 Maret 2007    |
| 32. | Penjualan aset PTPN 2 seluas 78,16 hektare di Desa Dagang Kerawang, Tanjung Morawa, Deliserdang                     | Rp11 miliar     | Kepala Dinas (Kadis) Pekerjaan Umum (PU) Pemkab Deliserdang Faisal                                                                                    |                                         | Pengadilan Negeri Lubukpakam               | Bebas                       | 28 Maret 2007    |
| 33. | Renovasi hotel Patra Jasa Bali                                                                                      | Rp 69 miliar    | Zulkarnaen dan Satio Pramono (mantan pegawai PT Patra Jasa)                                                                                           | Ariansyah B. Dali                       | Pengadilan Negeri Jakarta Selatan          | Bebas                       | 6 Maret 2007     |
| 34. | Dana Anggaran Biaya Tambahan atau ABT Kota Solo tahun 2003                                                          | Rp 981 juta     | Mantan Wali Kota Solo Slamet Suryanto                                                                                                                 | Pragsono                                | Pengadilan Negeri Solo                     | 1 tahun 3 bulan             | 14 Maret 2007    |
| 35. | Penyaluran kredit kepada 17 debitur tanpa memenuhi syarat                                                           | Rp 54,5 miliar  | Rijanta, mantan Kepala Cabang Bank BNI 46 Tangerang                                                                                                   | Suhadi                                  | Pengadilan Negeri Tangerang                | 5 tahun 6 bulan penjara     | 5 Maret 2007     |

| No  | Perkara Korupsi                                                                       | Kerugian Negara | Terdakwa                                                                                                                                                             | Hakim                                                               | Pengadilan                     | Vonis                   | Waktu         |
|-----|---------------------------------------------------------------------------------------|-----------------|----------------------------------------------------------------------------------------------------------------------------------------------------------------------|---------------------------------------------------------------------|--------------------------------|-------------------------|---------------|
|     | dari BNI 46 pada 2000-2001.                                                           |                 |                                                                                                                                                                      |                                                                     |                                |                         |               |
| 36. | Penyaluran kredit kepada 17 debitur tanpa memenuhi syarat dari BNI 46 pada 2000-2001. | Rp 54,5 miliar  | Iman Patirudin, pengelola pemasaran bisnis BNI 46 Tangerang, dan Ruzi Andi Harahap, pejabat analisis BNI 46 Tangerang.                                               | -                                                                   | Pengadilan Negeri Tangerang    | 4 tahun 4 bulan penjara | 5 Maret 2007  |
| 37. | Mark up belanja DPRD Nusa Tenggara Barat                                              | Rp17,533 miliar | Lalu Mustaqim, Ahmad Taqiuddin Mansyur, Muhammad Anwar MZ, AliAhmad, Abdul Hafid dan Lalu Kumala                                                                     | Riva'i Rasya                                                        | Pengadilan Tinggi (PT) Mataram | 5 tahun penjara         | 8 Maret 2007  |
| 38. | Pelepasan lahan proyek jalan tol Jakarta Outer Ring Road (JORR) TMII-Hankam           | Rp74,23 miliar  | Ir Dawud Djatmiko, juru bayar PT Jasa Marga                                                                                                                          | Artidjo Alkostar serta hakim agung Abbas Said dan Mansyur Kartayasa | Mahkamah Agung                 | 8 tahun penjara         | 15 Maret 2007 |
| 39. | Dana APBD Depok 2002                                                                  | Rp7,35 miliar   | Tiga mantan pimpinan DPRD Depok- Sutadi (mantan ketua DPRD), Naming D Bothin (kini ketua DPRD Depok), dan Hasbullah Rahmad (kini ketua Badan Kehormatan DPRD Depok). | Nyak Pha,I Made Tarra, dan Muchsin                                  | Mahkamah Agung                 | Lepas                   | 28 Maret 2007 |
| 40. | Dana proyek water boom park                                                           | Rp 5,8 miliar   | mantan kepala Dinas Kebudayaan dan Pariwisata (Budpar) Provinsi Jambi Syamawi Darahim                                                                                | Agus Cholif, R Peranginangin dan Amin Ismanto.                      | Pengadilan Negeri Jambi        | Bebas                   | 22 Maret 2007 |
| 41. | Dana proyek water boom park                                                           | Rp 5,8 miliar   | Aken Purba, mantan Staff Dinas Kebudayaan dan Pariwisata (Budpar) Provinsi Jambi Syamawi Darahim                                                                     | -                                                                   | Pengadilan Negeri Jambi        | 3 tahun penjara         | Maret 2007    |
| 42. | Dana Bencana alam di Kota Kupang.                                                     | Rp.8 miliar     | Hary Theofilus (Mantan kadis kumpraswil kota kupang),                                                                                                                | Noor Tjahjono, S.H ,I Made Pasek, S.H dan Bernadette Samosir,       | Pengadilan Negeri Kupang       | Bebas                   | 16 Maret 2007 |
| 43. | Suap senilai Rp 4 juta dalam meloloskan kayu hasil pembalakan liar                    | -               | Muchtar Salihat, mantan Koordinator Balai Pelayanan dan Pengawasan Hasil Hutan Cirebon                                                                               |                                                                     | Pengadilan Negeri Kota Cirebon | 1 tahun penjara         | 8 Maret 2007  |
| 44. | Suap dalam meloloskan kayu hasil pembalakan liar                                      | -               | Pontjodijono, pemilik PT TGB Cirebon                                                                                                                                 |                                                                     | Pengadilan Negeri Kota Cirebon | Bebas                   | Maret 2007    |

| No  | Perkara Korupsi                                                                                                                                            | Kerugian Negara | Terdakwa                                                                                    | Hakim                                                                          | Pengadilan                       | Vonis                                               | Waktu         |
|-----|------------------------------------------------------------------------------------------------------------------------------------------------------------|-----------------|---------------------------------------------------------------------------------------------|--------------------------------------------------------------------------------|----------------------------------|-----------------------------------------------------|---------------|
| 45. | Mark up pada proyek pengadaan alat-alat bengkel dan laboratorium periode 2001-2002                                                                         | Rp 209 juta     | Direktur Politeknik Negeri Sriwijaya (Polsri) Drs Syamsul Bahri MM                          |                                                                                | Pengadilan Negeri Palembang      | 3 tahun penjara                                     | 26 April 2007 |
| 46. | Mark up pada proyek pengadaan alat-alat bengkel dan laboratorium periode 2001-2002                                                                         | Rp 209 juta     | Drs Syaifoellah, assiten Direktur Polsri                                                    | Nasaruddin Tappo SH, Usaha Ginting SH, dan J Lumban Gaol SH.                   | Pengadilan Negeri Palembang      | 3 tahun penjara                                     | April 2007    |
| 47. | Dana Kredit Usaha Tani (KUT) pada KUD Sugema, Ciamis                                                                                                       | Rp 979 juta     | Dudung Rusmana (ketua) dan Dasep Suryaman (manajer) KUD Sugema, Ciamis                      | Atja Sondjadja, S.H. dan anggota Muhammad Taufik, S.H., serta I Made Tara, S.H | Mahkamah Agung                   | Dudung (3 tahun 6 bulan penjara)<br>Dasep (3 tahun) | 4 April 2007  |
| 48. | Dana Kredit Usaha Tani (KUT) pada KUD Sugema, Ciamis                                                                                                       | Rp 979 juta     | Henny Syahlan, Sekretaris KUD Sugema                                                        | Atja Sondjadja, S.H. dan anggota Muhammad Taufik, S.H., serta I Made Tara, S.H | Mahkamah Agung                   | Bebas                                               | 4 April 2007  |
| 49. | Dana Instruksi Gubernur (Ingub)                                                                                                                            | Rp 800 juta     | FSupito, anggota FPD-P DPRD Jateng                                                          | Subachran Hardi                                                                | Pengadilan Negeri Blora          | Bebas                                               | 2 April 2007  |
| 50. | Mengambil kayu di luar lahan yang telah ditetapkan dalam Izin Pemanfaatan Kayu atau IPK.                                                                   | Rp 7,3 miliar   | Teddy Antoni, Direktur PT Andalas Terang Nusantara                                          | Betty                                                                          | Pengadilan Negeri Padang         | Bebas                                               | 25 April 2007 |
| 51. | proyek pengadaan tanah untuk perkantoran Pemkot Prabumulih di Desa Sindur, Kecamatan Cambai, dan RSUD di Kelurahan Gunung Ibul, Kecamatan Prabumulih Timur | Rp 3,005 miliar | Rachman Djalili, wali kota Prabumulih nonaktif SH                                           | Iskandar Kamil SH, Kaimuddin Saleh SH, serta Mugihardjo                        | Mahkamah Agung                   | Bebas                                               | 25 April 2007 |
| 52. | Program Penanggulangan Dampak Pengurangan Subsidi Bidang Kesehatan dan Program Kompensasi Subsidi Bahan Bakar Minyak Bidang Kesehatan.                     | Rp 300 juta     | mantan Wakil Direktur Pelayanan Medis Rumah Sakit Umum Pusat Adam Malik dr Daniel Ginting,. |                                                                                | Pengadilan Tinggi Sumatera Utara | 3 tahun penjara                                     | April 2007    |

| No  | Perkara Korupsi                                                                                                                    | Kerugian Negara  | Terdakwa                                                                                                                                                    | Hakim                                       | Pengadilan                        | Vonis                                                                                                                       | Waktu       |
|-----|------------------------------------------------------------------------------------------------------------------------------------|------------------|-------------------------------------------------------------------------------------------------------------------------------------------------------------|---------------------------------------------|-----------------------------------|-----------------------------------------------------------------------------------------------------------------------------|-------------|
| 53. | Suap kepada penyidik Polri dalam kasus pembobolan BNI Cab. Kebayoran                                                               | -                | bekas Direktur Kepatuhan BNI M. Arsjad dan bekas Kepala Divisi Hukum BNI Tri Kuntoro                                                                        | Johanes E. Binti                            | Pengadilan Negeri Jakarta Selatan | Bebas                                                                                                                       | 22 Mei 2007 |
| 54. | dana tak tersangka Anggaran Pendapatan dan Belanja Daerah 2003, untuk membayar dana tunjangan perumahan anggota DPRD Banten.       | Rp 10,5 miliar   | Lima mantan anggota Dewan Perwakilan Rakyat Daerah Banten periode 2001-2004                                                                                 | Suhartanto                                  | Pengadilan Negeri Serang          | Aap Aptadi, 1 tahun penjara.<br>Effendi Yusuf Sagala, Malik Komet, M Dahmir Tampubolon, dan Rudi Korua, (1 5 bulan penjara) | 10 Mei 2007 |
| 55. | Pembangunan dan pengembangan Pasar Cikajang, Garut                                                                                 | Rp 1,116 Miliar. | Ocad Rosyadin, Direktur CV Duta Alam                                                                                                                        | Endang Ipsiani, Dulhusin, dan I Ketut Tirta | Pengadilan Negeri Garut           | 4 tahun penjara                                                                                                             | 22 Mei 2007 |
| 56. | Pengadaan 399 tempat pemungutan suara (TPS) fiktif, mengelembungkan dana untuk alat pemungutan suara Pemilu Legislatif Tahun 2004. | Rp 896 juta      | Mantan Bendahara Komisi Pemilihan Umum Daerah (KPUD) MZ Amri, mantan Sekretaris KPUD Bambang Santoso, dan Kasubag Umum Tulus Hardoyo.                       | Sri Purnawati                               | Pengadilan Negeri Banyuwangi      | MZ Amri 13 bulan penjara, Bambang Santoso dan Tulus Hardoyo 1 tahun penjara.                                                | 21 Mei 2007 |
| 57. | Dana Purna Tugas (DPT) DPRD Kota Yogyakarta 1999– 2004                                                                             | Rp 3 miliar      | Mantan ketua dan sekretaris panitia anggaran (panggar) Dana Purna Tugas (DPT) DPRD Kota Yogyakarta 1999– 2004, Cindelaras Yulianto dan Arief Adi Subiyanto. | Sapawi                                      | Pengadilan Negeri Yogyakarta      | 4 tahun penjara                                                                                                             | 21 Mei 2007 |
| 58. | Pengelembungan kertas suara pilkadasung (pemilihan kepala daerah langsung),                                                        | Rp 10 juta       | Mantan Sekretaris KPUD (Komisi Pemilihan Umum Daerah) Kabupaten Sukabumi, Dadang Eka.                                                                       |                                             | Pengadilan Negeri Cibadak         | Bebas                                                                                                                       | 14 Mei 2007 |

| No  | Perkara Korupsi                                                                                                                                          | Kerugian Negara | Terdakwa                                                                                                                                                                                                                                                                                                            | Hakim                                              | Pengadilan                   | Vonis                   | Waktu      |
|-----|----------------------------------------------------------------------------------------------------------------------------------------------------------|-----------------|---------------------------------------------------------------------------------------------------------------------------------------------------------------------------------------------------------------------------------------------------------------------------------------------------------------------|----------------------------------------------------|------------------------------|-------------------------|------------|
| 59. | Pengadaan lahan Bandara Sukarno-Hatta                                                                                                                    | Rp 2,537 miliar | Delapan terdakwa (Ahmad Dimiyati, bekas Camat Benda; Nawawi, bekas Lurah Benda; Rusmino dan Aryo. pegawai PT Angkasa Pura II; Muhammad Nape, Camat Neglasari; Ahmad Syafei, Lurah Selapajang; Aula Ismat Wahidin, pegawai Dinas Pertanian Kota Tangerang; dan Hamka, bekas pegawai Badan Pertanahan Kota Tangerang) | Zaid Umar Bob Said                                 | Pengadilan Negeri Tangerang  | Bebas                   | 1 Mei 2007 |
| 60. | Dana Fakultas Hukum Universitas Indonesia untuk 12 kegiatan                                                                                              | Rp 2,8 miliar   | Eka Widiyastuti Lisnandar, bendahara Fakultas Hukum Universitas Indonesia                                                                                                                                                                                                                                           |                                                    | Pengadilan Negeri Kota Depok | 8 tahun penjara         | 1 Mei 2007 |
| 61. | Kredit usaha tani (KUT) koperasi unit desa (KUD) di Kab. Subang                                                                                          | Rp 198,7 juta   | Kosasih, karyawan BRI Syariah Cianjur                                                                                                                                                                                                                                                                               | Sanwari, S.H                                       | Pengadilan Negeri Subang     | 1 tahun penjara         | 7 Mei 2007 |
| 62. | APBD Kota Sukabumi tahun 2002 sampai 2004, untuk dana sarana mobilitas anggota dewan, dana purna bakti, pembuatan buku memori, dan sisa perjalanan dinas | Rp 3,75 miliar  | Mantan Ketua DPRD Kota Sukabumi periode 1999 - 2004, H. Muchtar Ubaidillah dan mantan Wakil Ketua DPRD periode yang sama, H. Tatang Komara yang saat ini menduduki posisi Ketua DPRD Kota Sukabumi periode 2004-2009                                                                                                | AA. Anom Hartanindita                              | Pengadilan Negeri Sukabumi   | 1 tahun 6 bulan penjara | 7 Mei 2007 |
| 63. | Proses pelelangan aset PT. Budi Trisakti                                                                                                                 | Rp 1,28 miliar  | Mirsjal Effendi Tandjung, 55, Kepala Kantor Piutang dan Lelang Negara (KP2LN) Banda Aceh                                                                                                                                                                                                                            | Sukri, SH, M.Hum, Tito Suhud, SH dan Rahmawati, SH | Pengadilan Negeri Banda Aceh | Bebas                   | 1 Mei 2007 |
| 64. | Proyek pengadaan jasa konsultan di PT Telkom                                                                                                             | Rp789 juta      | Mantan Direktur Sumber Daya Manusia (SDM) PT Telkom Agus Utoyo dan mantan Asisten Kebijakan SDM PT Telkom Teuku Heidi Safina                                                                                                                                                                                        | Syarifudin                                         | Pengadilan Negeri Bandung    | 1 tahun penjara         | 2 Mei 2007 |

| No  | Perkara Korupsi                                                                               | Kerugian Negara  | Terdakwa                                                                                                                                                  | Hakim                                    | Pengadilan                        | Vonis                                                                                                                             | Waktu        |
|-----|-----------------------------------------------------------------------------------------------|------------------|-----------------------------------------------------------------------------------------------------------------------------------------------------------|------------------------------------------|-----------------------------------|-----------------------------------------------------------------------------------------------------------------------------------|--------------|
| 65. | Tabungan Perumahan Wajib Prajurit (BTPWP) TNI AD                                              | Rp8,5 miliar     | Kolonel Ngadimin Darmosujono, Samuel Kristanto, dan Dedy Budiman Garna                                                                                    | Sudarmadji                               | Pengadilan Negeri Jakarta Selatan | Ngadimin Darmosujono<br>9 tahun penjara<br><br>Samuel Kristanto<br>10 tahun penjara<br><br>Dedy Budiman Garna<br>13 tahun penjara | 1 Mei 2007   |
| 66. | Impor beras ilegal 60.000 ton dari Vietnam                                                    | Rp 25,413 miliar | Yamiral Azis Santoso dan Wahjono (Mantan Pejabat Bea Cukai)                                                                                               | Parman Soeparman, Soedarno, Imam Haryadi | Mahkamah Agung                    | Bebas<br><br><u>Tuntutan JPU</u><br>10 tahun penjara.                                                                             | 16 Mei 2007  |
| 67. | Penggelembungan surat suara pada Pemilihan Bupati dan Wakil Bupati Sukabumi periode 2005-2010 | Rp 10 juta       | mantan Kabag Pemerintahan Pemkab Sukabumi, Ajo Sarjono,                                                                                                   | Sir Johan                                | Pengadilan Negeri Cibadak         | Bebas                                                                                                                             | 21 Mei 2007  |
| 68. | Penggelembungan surat suara pada Pemilihan Bupati dan Wakil Bupati Sukabumi periode 2005-2010 | Rp 10 juta       | anggota KPUD Sukabumi Muhamad Iskandar                                                                                                                    |                                          | Pengadilan Negeri Cibadak         | 1 tahun penjara                                                                                                                   | 21 Mei 2007  |
| 69. | Perpanjangan Hak Guna Bangunan (HGB) Hotel Hilton                                             | Rp 1,936 triliun | Pontjo Sutowo dan Ali Mazi.                                                                                                                               | Andriani Nurdin                          | Pengadilan Negeri Jakarta Pusat   | Bebas                                                                                                                             | 12 Juni 2007 |
| 70. | Dana observasi, operasional, dan penunjang kegiatan APBD 2001-2002                            | Rp 9,816 miliar  | Empat mantan pimpinan DPRD Kota Bandung periode 1999-2004 - Isa Subagja (mantan Ketua DPRD Kota Bandung), Entjo Warso, Saud Effendi, dan Ujang Syahrudin. | Hidayatul Manan                          | Pengadilan Negeri Bandung         | Bebas                                                                                                                             | 5 Juni 2007  |

| No  | Perkara Korupsi                                                                                                                                                                | Kerugian Negara | Terdakwa                                                                                                                                                                               | Hakim                                                                               | Pengadilan                 | Vonis                | Waktu        |
|-----|--------------------------------------------------------------------------------------------------------------------------------------------------------------------------------|-----------------|----------------------------------------------------------------------------------------------------------------------------------------------------------------------------------------|-------------------------------------------------------------------------------------|----------------------------|----------------------|--------------|
| 71. | APBD Jateng tahun 2003                                                                                                                                                         | Rp 14,8 miliar, | wakil ketua DPRD Provinsi Jawa Tengah periode 1999-2004, Muhammad Hasbi dan Ircham Abdurrohman                                                                                         | Sudaryatmo SH                                                                       | Pengadilan Negeri Semarang | 1 tahun penjara      | 5 Juni 2007  |
| 72. | Dana APBD Parigi Moutong Tahun 2004                                                                                                                                            | Rp 2,9 miliar   | 5 Anggota DPRD Kab. Parigi Moutong Periode Tahun 2002-2004.                                                                                                                            | M. Taufik, IMade Sukadana, Yohannes Panji                                           | Pengadilan Negeri Palu     | Bebas                | 22 Juni 2007 |
| 73. | Dana APBD Parigi Moutong Tahun 2004                                                                                                                                            | Rp 2,9 miliar   | 6 Anggota DPRD Kab. Parigi Moutong Periode Tahun 2002-2004.                                                                                                                            | M. Taufik, IMade Sukadana, Yohannes Panji                                           | Pengadilan Negeri Palu     | Bebas                | 22 Juni 2007 |
| 74. | Penyalahgunaan Surat Keterangan Sahnya Hasil Hutan (SKSHH) dengan lokasi Kab. Buol yang diterbitkan oleh Pejabat Dinas Kehutanan Sulteng Tahun 2002.                           | Rp 95 juta      | 1. Mohammad Yusuf S.Pusadan, 2. H. Mahbud Lantagi, SE. 3. H. Ardin Lantagi (Terdakwa 1,2,3 Pengusaha). 4. Guntar Tampubolon (Pejabat Dinas Kehutanan Sulteng yang mengeluarkan SKSHH). |                                                                                     | Pengadilan Negeri Palu     | Bebas                | 5 Juni 2007  |
| 75. | APBD Kudus                                                                                                                                                                     | Rp 18 miliar    | Herris Paryono, mantan Ketua DPRD Kudus periode 1999-2004                                                                                                                              |                                                                                     | Pengadilan Negeri Kudus    | 6 tahun penjara      | 18 Juni 2007 |
| 76. | Dana perumahan DPRD Banten                                                                                                                                                     | Rp 10,5 miliar  | Lima mantan anggota DPRD Banten 2001-2004, Iwan Rosadi, Riril Suhartinah, Jhon R. Maulana, Achdi Samliani, dan Zaenal Novani                                                           | Saifoni, SH Tety Setiawati<br>Yohanes Priyana, (dissenting opinion)                 | Pengadilan Negeri Serang   | Bebas                | 4 Juni 2007  |
| 77. | Penyalahgunaan dana penerimaan UMK (uang muka kerja) yang bersumber dari program S1 reguler, S1 ekstensi, dan S2 nonreguler yang digunakan untuk biaya perjalanan dinas (SPPD) | Rp26 juta       | Guru besar Fakultas Hukum Universitas Hasanuddin Makassar, Achmad Ali dan mantan Bendahara Universitas Hasanuddin Makassar, Alimuddin Karim                                            | Sudirman Hadi, Soeroso Ono, Sarifuddin Umar, Agus Iskandar, dan Nawawi Pomolongo    | Pengadilan Negeri Makassar | Bebas (putusan sela) | 12 Juni 2007 |
| 78. | APBD Kabupaten Ciamis tahun 2001-2002                                                                                                                                          | Rp 5,2 miliar   | Akhmad Dimiyati, Wakil Wali Kota Banjar non-aktif dan Taufik anggota DPRD Kabupaten Ciamis.                                                                                            | Dr. Harifin A. Tumpa, S.H., M.H., I Made Tara, S.H., dan Prof. Dr. H. Muchsin, S.H. | Mahkamah Agung             | Bebas                | 13 Juni 2007 |



| No  | Perkara Korupsi                                                                      | Kerugian Negara  | Terdakwa                                                                                                                                                                                              | Hakim             | Pengadilan                                        | Vonis           | Waktu        |
|-----|--------------------------------------------------------------------------------------|------------------|-------------------------------------------------------------------------------------------------------------------------------------------------------------------------------------------------------|-------------------|---------------------------------------------------|-----------------|--------------|
| 79. | APBD Kota Banjarmasin                                                                | Rp 7,9 miliar    | enam mantan anggota DPRD Banjarmasin (M Yusri (kini Ketua Komisi C DPRD Banjarmasin), Jainal Hakim (kini Ketua Komisi B), Achyadi, Ahyat Noor, M Aminullah, dan Hamdani Yusran).                      |                   | Pengadilan Negeri Banjarmasin, Kalimantan Selatan | 1 tahun penjara | 11 Juni 2007 |
| 80. | Dana Aspirasi Masyarakat tahun anggaran 2005                                         | Rp 25 juta       | Kepala Biro Pembangunan Pemerintah Provinsi (Pemprov) Sulawesi Utara (Sulut), Johny Lolong,                                                                                                           | Ridwan Damanik SH | Pengadilan Negeri Manado                          | Bebas           | 21 Juni 2007 |
| 81. | Memperpanjang HGB No 26 dan No 27 atas nama PT Indobuildco selama 20 tahun           | Rp 1,936 triliun | Kepala Kantor Wilayah (Kakanwil) Badan Pertanahan Nasional (BPN) DKI Jakarta, Robert J Lumampouw                                                                                                      | Adriani Nurdin    | Pengadilan Negeri Jakarta Pusat                   | 3 tahun penjara | 27 Juni 2007 |
| 82. | Pengadaan mikroskop Dinas Pendidikan Kota Surabaya                                   | -                | Arthur selaku Kasubdin Dikmenum dan Imanudin selaku direktur CV Dhika Manunggal                                                                                                                       |                   | Pengadilan Negeri Surabaya                        | 1 tahun penjara | 9 Juni 2007  |
| 83. | APBD Kota Banjarmasin                                                                | Rp 7,9 miliar    | enam mantan anggota DPRD Banjarmasin, yakni Taufik Hidayat (kini Ketua DPRD Banjarmasin), Syamsul Qamar, Mahyani Diris (kini anggota Komisi B), Hayatus Solohin, Sayuti Enggok, dan Syamsul Ariffin). |                   | Pengadilan Negeri Banjarmasin, Kalimantan Selatan | 1 tahun penjara | 9 Juni 2007  |
| 84. | Memperpanjang HGB No 26 dan No 27 atas nama PT Indobuildco selama 20 tahun           | Rp 1,936 triliun | Kepala Kantor Pertanahan Jakarta Pusat, Ronny Kusuma Yudhistiro                                                                                                                                       | Adriani Nurdin    | Pengadilan Negeri Jakarta Pusat                   | Bebas           | 27 Juni 2007 |
| 85. | Dana penunjang di DPRD Kabupaten Kupang, Nusa Tenggara Timur (NTT) periode 1999-2004 | Rp1 miliar       | tujuh mantan anggota Komisi C DPRD Kabupaten Kupang dan Ketua DPRD Kabupaten Ruben Foenay                                                                                                             |                   | Pengadilan Tinggi NTT                             | Bebas           | Juli 2007    |
| 86. | APBD Kudus 2002- 2004                                                                | Rp 18,5 miliar   | Chusni Mubaroq, Abdullah Zaini dan Eddy Yusuf (mantan anggota DPRD Kudus periode 1999-2004)                                                                                                           | Dwi Dayanto       | Pengadilan Negeri Kab Kudus                       | 5 tahun penjara | 3 Juli 2007  |

| No  | Perkara Korupsi                                                                     | Kerugian Negara  | Terdakwa                                                                                             | Hakim                                                                        | Pengadilan                   | Vonis                                           | Waktu        |
|-----|-------------------------------------------------------------------------------------|------------------|------------------------------------------------------------------------------------------------------|------------------------------------------------------------------------------|------------------------------|-------------------------------------------------|--------------|
| 87. | Dana purnatugas (DPT) anggota DPRD Kota Yogyakarta periode 1999-2004                | Rp1,589 miliar   | 13 mantan anggota DPRD Kota Yogyakarta periode 1999-2004                                             | Rangke Lemba, Janiko Girsang dan Arif Waluyo                                 | Pengadilan Negeri Yogyakarta | 1 tahun penjara                                 | 19 Juli 2007 |
| 88. | Pengadaan buku Kimia dan Biologi untuk SLTP se-Jawa Barat                           | Rp 4 miliar      | Pimpro pengadaan buku SLTP pada Diknas Propinsi Jawa Barat, Joko Sulistio.                           | Cepi Iskandar                                                                | Pengadilan Negeri Bandung    | Bebas<br><u>Tuntutan JPU</u><br>5 tahun penjara | 30 Juli 2007 |
| 89. | APBD Kota Magelang 2003                                                             | Rp1,529 miliar   | Wakil Ketua DPRD Kota Magelang Sutjipto dan mantan Wakil Ketua DPRD Kota Pramono,                    |                                                                              | PN Kota Magelang             | 2 tahun penjara                                 | 30 Juli 2007 |
| 90. | Pengadaan barang dan jasa pada Pemilu 2004 (dana sisa KPU Bantul)                   | -                | Arif Iskandar serta Suwandi (Ketua dan anggota KPU Bantul)                                           |                                                                              | Pengadilan Negeri Bantul     | 1 tahun penjara                                 | Juli 2007    |
| 91. | Pengadaan barang dan jasa pada Pemilu 2004 (dana sisa KPU Bantul)                   | -                | Kepala Subbagian Umum KPU Bantul Marsono,                                                            |                                                                              | Pengadilan Negeri Bantul     | 1 tahun 4 bulan                                 | Juli 2007    |
| 92. | Pengadaan buku ajar paket SD-SMA Kabupaten Sleman, Daerah Istimewa Yogyakarta (DIY) | Rp 12,127 miliar | M. Bachroem Kepala Dinas P dan K kab Sleman                                                          | Herry Swantoro SH, ketua (wakil Ketua PN Sleman), anggota Muslim SH Kusno SH | PN Sleman                    | 5 tahun penjara                                 | 4 Juli 2007  |
| 93. | Pembuatan surat tugas fiktif 258 CPNS 2005 di lingkungan Depag Ngawi.               | Rp826 juta       | Mantan Kepala Kantor Departemen Agama (Kakandepag) Ngawi, Jawa Timur periode 2004-2005, Ator Subroto |                                                                              | Pengadilan Negeri Ngawi      | 1 tahun penjara                                 | 19 Juli 2007 |
| 94. | Proyek Aspal Mixing Plant (AMP) Kulonprogo                                          | Rp 3,8 miliar    | Ir Budianto Mukhtar Ribam                                                                            | Sucipto SH.                                                                  | Pengadilan Negeri Wates      | Lepas<br><u>Tuntutan JPU</u><br>6 tahun penjara | 12 Juli 2007 |
| 95. | Proyek Aspal Mixing Plant (AMP) Kulonprogo                                          | Rp 3,8 miliar    | Kabag Hukum Pemprop DIY Agung Supriyono SH (47) dan Kepala Bapeda Kulonprogo Drs Darto               | K Ginting SH                                                                 | Pengadilan Negeri Wates      | Bebas<br><u>Tuntutan JPU</u><br>5 tahun penjara | 12 Juli 2007 |

| No   | Perkara Korupsi                                                                      | Kerugian Negara | Terdakwa                                                                                                                                                                        | Hakim                                                 | Pengadilan                     | Vonis                                                                                                                                 | Waktu           |
|------|--------------------------------------------------------------------------------------|-----------------|---------------------------------------------------------------------------------------------------------------------------------------------------------------------------------|-------------------------------------------------------|--------------------------------|---------------------------------------------------------------------------------------------------------------------------------------|-----------------|
| 96.  | Pemberian kredit Bank Mandiri                                                        | Rp 1,315 miliar | Sapto Aji, Dose Darmawan, Iim Ibrahim, dan Sunaryo Soetomo (empat karyawan Bank Mandiri Cabang Sukabumi-Sudirman)                                                               |                                                       | Pengadilan Tinggi Jawa Barat   | Sapto Aji<br>4 tahun penjara<br><br>Dose Darmawan<br>3 tahun penjara<br><br>Iim Ibrahim dan Sunaryo Soetomo Putro<br>2 tahun penjara. | 18 Juli 2007    |
| 97.  | Penyalahgunaan dana proyek pengadaan tanah untuk pembangunan STAHK-TP pada 2003-2004 | -               | mantan Wali Kota Palangkaraya, Kalimantan Tengah, Salundik Gohong dan Lukas Tingkes, serta mantan Ketua Sekolah Tinggi Agama Hindu Kaharingan Tampung Penyang (STAHK-TP) Midday | I Gusti Lanang Putu Wirawan                           | Pengadilan Negeri Palangkaraya | 1 tahun penjara                                                                                                                       | 14 Juni 2007    |
| 98.  | Pengadaan buku ajar paket SD-SMA Kabupaten Sleman, Daerah Istimewa Yogyakarta (DIY)  | Rp12,127 miliar | Muhdori Masuko, Ketua Panitia Pengadaan Buku Ajar Paket SD, SMP dan SMA 2004 Kabupaten Sleman                                                                                   | Heri Suwantoro                                        | Pengadilan Negeri Sleman       | 4,5 tahun penjara                                                                                                                     | 4 Juli 2007     |
| 99.  | Pengadaan pakaian dinas PNS di lingkungan Pemkab Kisaran, TA 2003                    | -               | Drs Risuddin.                                                                                                                                                                   |                                                       | Pengadilan Negeri Kisaran      | Bebas                                                                                                                                 | Juli 2007       |
| 100. | Proyek pembangunan balai kota dan gedung C Pemkot Bengkulu                           | -               | Mantan Kabag Penyusunan Program (Sunram), Pemkot Bengkulu, Ir. H. Ahmad Azhary AR, MM                                                                                           | Iskandar Kamil                                        | Mahkamah Agung                 | Bebas                                                                                                                                 | Juli 2007       |
| 101. | APBD 2003 DPRD Kendal                                                                | -               | Mantan Sekda H Endro Arintoko SH MM                                                                                                                                             | Sindhu Sutrisno SH, Fahzal Hendry SH dan Wahyu Iswari | Pengadilan Negeri Kendal       | 4 tahun penjara                                                                                                                       | 27 Agustus 2007 |

| No   | Perkara Korupsi                                                                       | Kerugian Negara  | Terdakwa                                                                                                                        | Hakim                                                                                                                                    | Pengadilan                          | Vonis                                      | Waktu           |
|------|---------------------------------------------------------------------------------------|------------------|---------------------------------------------------------------------------------------------------------------------------------|------------------------------------------------------------------------------------------------------------------------------------------|-------------------------------------|--------------------------------------------|-----------------|
| 102. | BLT (bantuan langsung tunai).                                                         | Rp18 juta        | Faowoloo Zega bekas Kepala Kantor Pos Lahewa, Nias                                                                              | Andi H, A Purba dan Decky AS Nitbani                                                                                                     | Pengadilan Negeri Gunungsitoli Nias | 1 tahun penjara                            | 6 Agustus 2007  |
| 103. | Penyalahgunaan dana pendistribusian minyak goreng Bulog                               | Rp 169,7 miliar, | Nurdin Halid, Ketua Umum Koperasi Distribusi Indonesia (KDI)                                                                    | Bagir Manan, Iskandar Kamil, Parman Soeparman, Djoko Sarwoko, dan Moegihardjo                                                            | Mahkamah Agung                      | 2 tahun penjara                            | 13 Agustus 2007 |
| 104. | Penerbitan SKSHH untuk pembalakan kayu di Sipora Mentawai                             | -                | dua pegawai Dinas Kehutanan Kabupaten Kepulauan Mentawai, Royens Pardede (42) dan Ondi Jublin Sinaga (41)                       | Sofyan Basid SH, Hj Nuraina Agus SH dan I Gusti Made Antara SH                                                                           | Pengadilan Tinggi Padang            | Bebas                                      | 26 Agustus 2007 |
| 105. | Pengadaan Logistik Pilkada Banten                                                     | Rp 927 Juta      | Didi Hidayat Laksana (60), Ketua KPUD Banten                                                                                    | Syamsi                                                                                                                                   | Pengadilan Negeri Serang            | Bebas                                      | 15 Agustus 2007 |
| 106. | Pengadaan Logistik Pilkada Banten                                                     | Rp 927 Juta      | Ghaos (45), Ketua Panitia Pengadaan Barang dan Jasa KPUD Banten                                                                 | Syamsi                                                                                                                                   | Pengadilan Negeri Serang            | Bebas                                      | 15 Agustus 2007 |
| 107. | Dana pengungsi Poso                                                                   | Rp1,2 miliar     | Mantan Gubernur Sulawesi Tengah (Sulteng), Prof Drs Aminuddin Ponulele                                                          | Faturrahman SH (ketua), Arief Boko SH (anggota), Surung Simandjuntak SH (anggota), Pranoto SH (anggota), dan Ivonne Maramis SH (anggota) | Pengadilan Negeri Palu              | Bebas<br>Tuntutan Jaksa<br>4 tahun penjara | 22 Agustus 2007 |
| 108. | Dana Provisi Sumber Daya Hutan (PSDH) dan Dana Reboisasi (DR) di Kabupaten Pontianak. | Rp 1,8 miliar    | Mantan Bupati Kabupaten Pontianak, Cornelis Kimha dan dan mantan Kepala Dinas Kehutanan Kabupaten Pontianak, Rahmad Hasan Basri |                                                                                                                                          | Pengadilan Negeri Mempawah          | Bebas                                      | 29 Agustus 2007 |
| 109. | Uang ganti rugi lahan proyek rel empat jalur Departemen Perhubungan                   | Rp 38 miliar     | Iskandar Rasyid, bendahara proyek rel empat jalur                                                                               | Kusnawi Mukhlis.                                                                                                                         | Pengadilan Negeri Jakarta Timur     | 5 tahun penjara                            | 2 Agustus 2007  |

| No   | Perkara Korupsi                                                             | Kerugian Negara | Terdakwa                                                                                                                            | Hakim                                                           | Pengadilan                           | Vonis            | Waktu             |
|------|-----------------------------------------------------------------------------|-----------------|-------------------------------------------------------------------------------------------------------------------------------------|-----------------------------------------------------------------|--------------------------------------|------------------|-------------------|
| 110. | Suap di PT Terminal Petikemas Surabaya (PT TPS).                            | Rp 700 juta     | Panut Darmanto, Suhadi, Suyanto, dan Bambang Susetiono(karyawan PT TPS)                                                             | Yunus                                                           | Pengadilan Negeri Surabaya           | Bebas            | 21 Agustus 2007   |
| 111. | Suap untuk membantu menyelundupkan kayu                                     | -               | Kepala Pelayanan Bea Cukai Tanjung Perak (KPBC) Tjahyono Sukarso                                                                    | -                                                               | Pengadilan Negeri Surabaya           | Bebas            | 21 Agustus 2007   |
| 112. | Pupuk Kaltim bersubsidi                                                     | -               | Eko Bimantoro                                                                                                                       | -                                                               | Pengadilan Negeri Surabaya           | Bebas            | 21 Agustus 2007   |
| 113. | Pengadaan barang dan jasa pada Pemilu 2004 (dana sisa KPU Bantul)           | Rp 471 juta     | Pelaksana Harian atau Plh Sekretaris Komisi Pemilihan Umum Bantul Kundryatno                                                        | Popop Rizanta, Yogi Arsono, dan Marliyus                        | Pengadilan Negeri Bantul             | Bebas            | 9 Agustus 2007    |
| 114. | Pengadaan kendaraan dinas (13 unit roda empat dan 17 unit roda dua) TA 2002 | Rp2 miliar      | mantan pimpinan proyek (Pimpro) pengadaan kendaran dinas pada Bagian Umum Pemkab Jeneponto, Dardiri, dan Busranuddin                | Jeni Nugrah didampingi Rajih Muis, Ernawati, dan Fatkur Rochman | Pengadilan Negeri Jeneponto          | Bebas            | 13 September 2007 |
| 115. | APBD Jember 2004                                                            | Rp 9.8 milyar   | Mantan Bupati Jember Samsul Hadi Siswoyo                                                                                            | Arief Supratman                                                 | Pengadilan Negeri Jember, Jawa Timur | 6 tahun penjara. | 20 September 2007 |
| 116. | APBD Kudus                                                                  | Rp 18 miliar    | Herris Paryono, mantan Ketua DPRD Kudus periode 1999-2004                                                                           | Suwardi dan beranggotakan Ratnawati R dan Hupoyo.               | Pengadilan Tinggi Jawa Tengah        | 6 tahun penjara  | 12 September 2007 |
| 117. | APBD Rokan Hilu 2003                                                        | Rp 3 miliar     | Mantan Bupati Rokan Hilu Ramlan Zas dan mantan Sekretaris Daerah (Sekda) Kabupaten Rokan Hulu Syarifuddin Nst.                      |                                                                 | Pengadilan Negeri Pasir Pengaraian   | 3 tahun penjara  | 24 September 2007 |
| 118. | Dana pemulangan pengungsi korban kerusuhan Poso pada 2001                   | Rp 1,2 miliar   | Andi Azikin Suyuti, Azikin, Bekas Bupati Poso, Sulawesi Tengah dan yang juga bekas Ketua Dinas Kesejahteraan Sosial Sulawesi Tengah |                                                                 | Pengadilan Negeri Palu               | 2 tahun penjara  | 2 September 2007  |
| 119. | Kredit macet Bank Mandiri                                                   | Rp 168 miliar   | ECW Neloe, I Wayan Pugeg, dan M. Sholeh Tasripan (Mantan Direksi Bank Mandiri)                                                      | Bagir Manan                                                     | Mahkamah Agung                       | 10 tahun penjara | September 2007    |

| No   | Perkara Korupsi                                                    | Kerugian Negara | Terdakwa                                                                                                                                                                                                                                                                              | Hakim                                                                             | Pengadilan                               | Vonis                                                                | Waktu           |
|------|--------------------------------------------------------------------|-----------------|---------------------------------------------------------------------------------------------------------------------------------------------------------------------------------------------------------------------------------------------------------------------------------------|-----------------------------------------------------------------------------------|------------------------------------------|----------------------------------------------------------------------|-----------------|
| 120. | Kredit macet Bank Mandiri                                          | Rp 168 miliar   | tiga direktur PT Cipta Graha Nusantara (CGN), Direktur Utama CGN, Edison, Direktur CGN Diman Ponijan, dan Komisaris CGN Saiful.                                                                                                                                                       | Bagir Manan , Iskandar Kamil, Harifin A Tumpa, Djoko Sarwoko serta Rehngena Purba | Mahkamah Agung                           | 8 tahun penjara                                                      | 24 Oktober 2007 |
| 121. | Pengadaan helikopter jenis MI-17                                   | Rp29,11 miliar  | Mantan Direktur Pelaksanaan anggaran Dirjen Perencanaan Sistem Pertahanan Departemen Pertahanan, Brigjen (purn) Prihandono, Mantan Kepala Pusat Keuangan Dephan Tardjani, dan Mantan Kepala Kantor Perbendaharaan Kas Negara (KPKN) IV, Mardjono serta rekanan pengadaan Andy Kosasih | Agung Rahardjo                                                                    | Pengadilan Negeri Jakarta Pusat          | Tiga orang<br>4 tahun penjara<br><br>Andy Kosasih<br>7 tahun penjara | 11 Oktober 2007 |
| 122. | APBD Provinsi Sumbar tahun 2002                                    | Rp 5,9 miliar   | 10 anggota DPRD Provinsi Sumbar periode 1999-2004 (yaitu Mafendi, Hilmi Hamid, Sueb Karyono, Hendra Irwan Rahim, Jufri Hadi, Lief Wanda, Alvian, Mahardi Effendi, Sahril BB, M Yunus Said)                                                                                            | Bagir Manan, Iskandar Kamil, Djoko Sarwoko                                        | Mahkamah Agung                           | lepas (Onstlaag van alle recht ver volging).                         | 10 Oktober 2007 |
| 123. | Pengambilalihan Pabrik Kertas Martapura                            | Rp 6,3 miliar   | Iskandar Djamaluddin (mantan Kepala BPN Banjar), Gunawan Sutanto (Direktur PT Golden), dan Hairul Saleh (mantan Kabag Umum dan Perlengkapan Setda Banjar)                                                                                                                             | Purwanto                                                                          | Pengadilan Negeri Martapura              | Bebas<br><br><u>Tuntutan JPU</u><br>6 tahun                          | 23 Oktober 2007 |
| 124. | Aset Rumah Dinas Walikota Manado sejak 2001 hingga 23 Agustus 2005 | Rp726,5 juta    | mantan Wali Kota Manado, Wempie Frederik                                                                                                                                                                                                                                              | Charles Simamora, Lanang Dauh, dan Robert Posumah                                 | Pengadilan Negeri Manado, Sulawesi Utara | Bebas                                                                | 8 Oktober 2007  |
| 125. | Program Aksi Mengatasi Dampak Kenaikan BBM (PAM DKB)               | Rp 98juta       | Mantan Lurah Putat Jaya, Sugeng Nuhariyanto                                                                                                                                                                                                                                           | Djanuanto                                                                         | Pengadilan Negeri Surabaya               | 1 tahun penjara                                                      | 9 Oktober 2007  |

| No   | Perkara Korupsi                                                                                                   | Kerugian Negara | Terdakwa                                                                                                           | Hakim                                       | Pengadilan                         | Vonis                                                                                       | Waktu           |
|------|-------------------------------------------------------------------------------------------------------------------|-----------------|--------------------------------------------------------------------------------------------------------------------|---------------------------------------------|------------------------------------|---------------------------------------------------------------------------------------------|-----------------|
| 126. | Impor sapi Australia tahun 2001                                                                                   | Rp10,12 miliar  | Mantan ketua tim monitoring pengadaan sapi Balai Urusan (Bulog). Tito Pranolo                                      | Wahjono                                     | Pengadilan Negeri Jakarta Selatan. | 4 tahun penjara                                                                             | 29 Oktober 2007 |
| 127. | Impor sapi Australia tahun 2001                                                                                   | Rp 5,079 miliar | Maulany Ghany Aziz (Direktur PT LNP)                                                                               |                                             | Pengadilan Negeri Jakarta Selatan  | 6 tahun penjara                                                                             | 29 Oktober 2007 |
| 128. | Impor sapi Australia tahun 2001                                                                                   | Rp 3,3 miliar   | Moeffreni dan Fahmi (Direktur dan karyawan PT SBM)                                                                 |                                             | Pengadilan Negeri Jakarta Selatan  | 5 tahun penjara                                                                             | 29 Oktober 2007 |
| 129. | APBD Kabupaten Buol Tolitoli                                                                                      | Rp 2, 9 miliar  | 18 mantan anggota DPRD Kabupaten Buol Tolitoli, Provinsi Sulawesi Tengah                                           | Abbas Said, Imam Haryadi, dan Imam Soebechi | Mahkamah Agung                     | Bebas                                                                                       | 10 Oktober 2007 |
| 130. | Proyek lantainisasi di Lembata tahun 2001                                                                         | Rp 674 juta     | Pimpinan proyek (pimpro) Leonardus Buyanaya dan Pimpinan CV Putra Lembata, Florianus Darius Liliweri.              |                                             | Pengadilan Negeri Lembata NTT      | Leonardus Buyanaya<br>2,6 tahun penjara<br><br>Florianus Darius Liliweri<br>4 tahun penjara | Oktober 2007    |
| 131. | Dana APBD Donggala                                                                                                | Rp84 miliar     | mantan pemegang kas daerah Kabupaten Donggala, Sulawesi Tengah (Sulteng), Yahya dan mantan juru bayar Daeng Malino |                                             | Pengadilan Negeri Donggala,        | Yahya<br>10 tahun penjara<br><br>Daeng Malino<br>8 tahun penjara.                           | 1 Oktober 2007  |
| 132. | Pengadaan pupuk organik program Gerakan Nasional Reboisasi Hutan dan Lahan (GNRHL) Kabupaten Purworejo tahun 2005 | Rp 1,6 miliar   | Edy Wijayanti ,Wakil Direktur CV Guna Reksha Utama                                                                 | -                                           | Mahkamah Agung                     | Bebas                                                                                       | 26 Oktober 2007 |
| 133. | APBD Kabupaten Pekalongan                                                                                         | Rp 4,379 M      | Dulmanan, mantan Ketua DPRD Pekalongan 1999- 2004                                                                  |                                             | Pengadilan Negeri Pekalongan       | 4 tahun                                                                                     | 25 Oktober 2007 |

| No   | Perkara Korupsi                                                 | Kerugian Negara                     | Terdakwa                                                                                                                                                                                                                            | Hakim                                                                                              | Pengadilan                        | Vonis                                              | Waktu            |
|------|-----------------------------------------------------------------|-------------------------------------|-------------------------------------------------------------------------------------------------------------------------------------------------------------------------------------------------------------------------------------|----------------------------------------------------------------------------------------------------|-----------------------------------|----------------------------------------------------|------------------|
| 134. | Pengadaan sapi potong oleh Perusahaan Umum Bulog                | Rp 10,116 miliar                    | Empat karyawan Perum Bulog. Imanusafi (Kepala Subdiv Investasi), A Nawawi (mantan Kepala Subsidi Pusat Jasa Logistik, Satuan Pengawas Internal Bulog), Ruchiyat Soebandi (pensiunan), dan Mika Ramba Kendenan (pegawai Perum Bulog) | Efran Basuning                                                                                     | Pengadilan Negeri Jakarta Selatan | Bebas<br><u>Tuntutan Jaksa</u><br>6 tahun penjara  | 7 November 2007  |
| 135. | Pembalakan liar hutan Mandailing Natal (Madina), Sumatera Utara | Rp119,8 miliar ditambah USD2,9 juta | Adelin Lis, Direktur Keuangan PT Keang Nam Development Indonesia (KNDI)                                                                                                                                                             | Arwan Byrin (ketua) dan Robinson Tarigan, Dolman Sinaga, Ahmad Sema, dan Jarasmen Purba (anggota). | Pengadilan Negeri Medan           | Bebas<br><u>Tuntutan Jaksa</u><br>10 tahun penjara | 5 November 2007  |
| 136. | Program penggemukan sapi                                        | Rp. 2,4 miliar.                     | Dr. Ir. Isa Dirja, direktur di Perusahaan Daerah Bumi Wiralodra Indramayu (PD BWI) milik Pemkab Indramayu                                                                                                                           | J. Sampaleng, Sugiarti, S.H. dan Eko Aryanto, S.H.                                                 | Pengadilan Negeri Indramayu       | Bebas<br><u>Tuntutan Jaksa</u><br>3 tahun penjara  | 5 Desember 2007  |
| 137. | Program penggemukan sapi                                        | Rp. 2,4 miliar.                     | Drs. H. Mohammad M.M, staf ahli Bupati Indramayu, yang juga merupakan mantan Asisten Bidang Perekonomian, Dirut PD BWI.                                                                                                             | Kamaludin                                                                                          | Pengadilan Negeri Indramayu       | Bebas                                              | 5 Desember 2007  |
| 138. | Tindak pidana korupsi <i>illegal logging</i> .                  | Rp14,4 miliar                       | Aloysius Tukan dan H. Markani (pengusaha HPH)                                                                                                                                                                                       | John Halasan Butar Butar                                                                           | Pengadilan Negeri Berau, Kaltim   | Bebas                                              | 12 November 2007 |
| 139. | Rencana pembiayaan keuangan kabupaten (RPKK) Kab OKU Selatan    | Rp1,938 miliar                      | Mantan Kepala Dinas Perindustrian, Perdagangan, Koperasi dan Pengusaha Kecil Menengah Kab OKU Mustafa Kamal dan Arafah kontraktor PT Marlakasa Abadi                                                                                |                                                                                                    | Pengadilan Negeri Baturaja        | Bebas                                              | 26 November 2007 |



| No   | Perkara Korupsi                                                                                 | Kerugian Negara | Terdakwa                                                                                                                                    | Hakim                                                                           | Pengadilan                                           | Vonis                                             | Waktu            |
|------|-------------------------------------------------------------------------------------------------|-----------------|---------------------------------------------------------------------------------------------------------------------------------------------|---------------------------------------------------------------------------------|------------------------------------------------------|---------------------------------------------------|------------------|
| 140. | Rencana pembiayaan keuangan kabupaten (RPKK) Kab OKU Selatan                                    | Rp1,938 miliar  | Rusli Nawi (Plt Bupati OKU Selatan)                                                                                                         |                                                                                 | Pengadilan Negeri Baturaja                           | Bebas                                             | November 2007    |
| 141. | Pengadaan buku teks wajib PT Balai Pustaka (BP) bagi siswa SD/MI dan SMP/MTs di Kabupaten Tegal | Rp 8 miliar     | AK Halim (mantan Kepala Dinas P dan K Kabupaten Tegal), Burhanudin (mantan kepala seksi P dan K), dan Karnoto Hadi (panitia lelang buku).   | HL Tobing SH                                                                    | Pengadilan Negeri Slawi.                             | Bebas                                             | 27 November 2007 |
| 142. | Pengadaan buku teks wajib PT Balai Pustaka (BP) bagi siswa SD/MI dan SMP/MTs di Kabupaten Tegal | Rp 8 miliar     | Drs Teddy Koesnady (mantan Dirut Balai Pustaka) dan H Murod Irawan (Direktur Utama PT Putra Ihsan Pramudita)                                | HL Tobing SH                                                                    | Pengadilan Negeri Slawi.                             | Bebas                                             | 27 November 2007 |
| 143. | Dana kaveling                                                                                   | Rp 33,4 miliar  | Suyaman, Mantan Wakil Ketua DPRD Jawa Barat dalam kasus.                                                                                    |                                                                                 | Pengadilan Negeri Bandung                            | Bebas                                             | 8 November 2007  |
| 144. | Pengadaan buku laporan tahunan BRR tahun 2006                                                   | Rp365 juta      | Achyrmansyah lubis dan Hendrawan Diandhi (swasta)                                                                                           |                                                                                 | Pengadilan Negeri Banda Aceh                         | 1 tahun penjara                                   | 15 November 2007 |
| 145. | Komisi Pemilihan Umum Daerah (KPUD) Kabupaten Tegal                                             | -               | enam Anggota KPUD yakni Fatikhudin S Ag, Aryo Santiko S Sos, Mahben Jalil SE MM, Agus Ali Saputro S Sos, Almanar ST dan Bambang Riswanto BA | HL Tobing SH, Sudar SH Mhum dan Suswanti                                        | Pengadilan Negeri Slawi                              | Bebas<br><u>Tuntutan Jaksa</u><br>3 tahun Penjara | 28 November 2007 |
| 146. | Dana gerakan rehabilitasi hutan dan lahan (Gerhan) pada 2004                                    | Rp 312 juta     | mantan Kepala Dinas Kehutanan dan Perkebunan Barito Kuala Iwan Hernawan dan stafnya Sandri                                                  | Pujoharsoyo                                                                     | Pengadilan Negeri Marabahan , Kabupaten Barito Kuala | Bebas<br><u>Tuntutan Jaksa</u><br>6 tahun penjara | 28 November 2007 |
| 147. | Pembangunan rumah pasca bencana tsunami                                                         | Rp422juta       | Saurtadat Sipayung dan Panti Hartono (pemborong)                                                                                            | JP Ziraluo dibantu hakim anggota Hedra Halomoan A Ginting, US Sipayung dan Andi | Pengadilan Negeri Gunungsitoli                       | 1 tahun penjara                                   | 15 November 2007 |

| No   | Perkara Korupsi                                                                                  | Kerugian Negara | Terdakwa                                                                                                                                                                                         | Hakim                    | Pengadilan                   | Vonis                                             | Waktu            |
|------|--------------------------------------------------------------------------------------------------|-----------------|--------------------------------------------------------------------------------------------------------------------------------------------------------------------------------------------------|--------------------------|------------------------------|---------------------------------------------------|------------------|
| 148. | Dana bantuan pengungsi                                                                           | Rp 693 juta     | Mohammad Ruslan, mantan Kepala Kantor Kesejahteraan Sosial (Kakan Kesos) Pemerintah Kabupaten Sampang, Madura dan Bendahara Kantor Kakan Kesor Edi Catur dan ketua tim operasional Zainal Arifin |                          | Pengadilan Negeri Sampang    | 1 tahun penjara                                   | 28 November 2007 |
| 149. | Sumbangan dana otonomi perguruan tinggi universitas Tadulako                                     | Rp 7,52 miliar. | Sahabuddin mustafa, rektor universitas Tadulako                                                                                                                                                  | Faturahman               | Pengadilan Negeri Palu       | Bebas<br><u>Tuntutan Jaksa</u><br>4 tahun Penjara | 12 Desember 2007 |
| 150. | Pengadaan 17 mesin laboratorium Politeknik Negeri Semarang (Polines)                             | Rp 1,323 miliar | Joko Triwardoyo dan Deny Kriswanto (subrekanan dalam proyek)                                                                                                                                     | YB Gunadi                | Pengadilan Negeri Semarang   | 1 tahun penjara                                   | 5 Desember 2007  |
| 151. | Pengadaan 17 mesin laboratorium Politeknik Negeri Semarang (Polines)                             | Rp 1,323 miliar | Sugiharto (Direktur Polines)                                                                                                                                                                     | YB Gunadi                | Pengadilan Negeri Semarang   | 1 tahun penjara                                   | 5 Desember 2007  |
| 152. | Korupsi dana otonomi daerah                                                                      | Rp 1,03 Miliar  | Bekas Bupati Nganjuk, Jawa Timur, Soetrisno Rachmadi                                                                                                                                             |                          | Pengadilan Negeri Nganjuk    | 2 tahun penjara                                   | 12 Desember 2007 |
| 153. | Korupsi APBD Jember 2004                                                                         | Rp 9,8 milyar   | Mantan Bupati Jember Samsul Hadi Siswoyo                                                                                                                                                         | Arief Supratman          | Pengadilan Tinggi Jawa Timur | 9 tahun penjara                                   | 19 Desember 2007 |
| 154. | Bulog Sub Divre XI Jember untuk gabah fiktif                                                     | Rp 24,7 miliar  | Mantan Kepala Bulog Sub Divre XI Jember Mucharor                                                                                                                                                 |                          | Pengadilan Negeri Jember     | 5 tahun penjara                                   | 18 Desember 2007 |
| 155. | Proyek pengadaan gabah kering giling (GKG) untuk Bulog di Sub Divisi Regional (Divre) XI Jember. | Rp 6,7 miliar.  | Gunawan Ng, direktur PT Agung Pratama Lestari (PT APL)                                                                                                                                           | Jack Johannes Oktavianus | Pengadilan Negeri Surabaya   | Bebas<br><u>Tuntutan Jaksa</u><br>6 tahun penjara | Desember 2007    |
| 156. | Gratifikasi atau penggunaan uang yang bukan haknya senilai sekitar Rp 91,4 juta                  | -               | Kepala Dinas Pendidikan dan Kebudayaan Bantul Sudarman dan staf Dinas P dan K Bantul, Bedjo Santoso                                                                                              |                          | Pengadilan Negeri Bantul     | Bebas                                             | 11 Desember 2007 |

| No   | Perkara Korupsi                                                                                        | Kerugian Negara | Terdakwa                                                                                                                                                                | Hakim                                                 | Pengadilan                             | Vonis           | Waktu            |
|------|--------------------------------------------------------------------------------------------------------|-----------------|-------------------------------------------------------------------------------------------------------------------------------------------------------------------------|-------------------------------------------------------|----------------------------------------|-----------------|------------------|
| 157. | Pembangunan kampus Sekolah Tinggi Ilmu Pertanian (Stiper) Kutai Timur (Kutim)                          | -               | Keenam tersangka masing-masing; H Adli, Toto Sutarto, Janarko, Ir Noviani Noor (pegawai Dinas PU), Ricky Suparto dan Bambang Utoro (pimpinan PT BBU)                    | M Legowo SH.                                          | Pengadilan Negeri Sangatta             | Bebas           | 5 Desember 2007  |
| 158. | Dana pembangunan Gedung Olahraga Ki Mageti dan Gedung DPRD                                             | Rp 7,5 miliar.  | Bupati Magetan Saleh Mulyono                                                                                                                                            |                                                       | Pengadilan Negeri Magetan, Jawa Timur, | 4 tahun penjara | 18 Desember 2007 |
| 159. | APBD 2003 DPRD Kendal                                                                                  | -               | Mantan Sekda H Endro Arintoko SH MM                                                                                                                                     | Sindhu Sutrisno SH, Fahzal Hendry SH dan Wahyu Iswari | Pengadilan Tinggi Semarang             | 4 tahun penjara | 5 Desember 2007  |
| 160. | Proyek di Dinas PU yang didanai oleh APBD Seram Bagian Barat Tahun 2006                                | -               | Kepala Dinas PU SBB Darmin Pattisahusiwa, Pimpinan Proyek Tahun 2006 di Dinas PU SBB Harold Edward Rumahlatu, dan Bos PT Nusa Ina Permai Rudi Sutanto selaku kontraktor | Hendra Pramono Agung                                  | Pengadilan Negeri Masohi Maluku        | Bebas           | 4 Desember 2007  |
| 161. | Dana Alokasi Khusus (DAK) pendidikan tahun 2006                                                        | Rp24,4 juta     | Kepala sekolah SD Negeri 10 Pelayangan Kota Jambi, Nyimas Zubaidahdi                                                                                                    | Sunaryo SH,                                           | Pengadilan Negeri Jambi                | 1 tahun penjara | 16 Desember 2007 |
| 162. | APBD Rahul 2003                                                                                        | Rp 3 miliar     | Mantan Bupati Rokan Hilu Ramlan Zas dan mantan Sekretaris Daerah (Sekda) Kabupaten Rokan Hulu Syarifuddin Nst.                                                          |                                                       | Pengadilan Tinggi Riau                 | 3 tahun penjara | 19 Desember 2007 |
| 163. | Pengadaan dana mobilitas, kunjungan kerja, purna bakti dan penyusunan buku memori selama 2001 dan 2004 | Rp3,69 miliar   | Ketua DPRD Kota Sukabumi, Jawa Barat, Tatang Komara, dan mantan Ketua DPRD Kota Sukabumi periode 1999-2004, Muchtar Ubaedillah                                          |                                                       | Pengadilan Tinggi Bandung              | Bebas           | Desember 2007    |

| No   | Perkara Korupsi                                                                                        | Kerugian Negara | Terdakwa                                                                                                                                                                                                                     | Hakim | Pengadilan                   | Vonis                                             | Waktu            |
|------|--------------------------------------------------------------------------------------------------------|-----------------|------------------------------------------------------------------------------------------------------------------------------------------------------------------------------------------------------------------------------|-------|------------------------------|---------------------------------------------------|------------------|
| 164. | Pengadaan dana mobilitas, kunjungan kerja, purna bakti dan penyusunan buku memori selama 2001 dan 2004 | Rp3,69 miliar   | Wakil Ketua DPRD Kota Sukabumi, M Faqih Abdurahman                                                                                                                                                                           |       | Pengadilan Tinggi Bandung    | 1 tahun penjara                                   | Desember 2007    |
| 165. | Pengadaan buku ajar sekolah dasar dan madrasah ibtidaiyah                                              | -               | Bupati Semarang Bambang Guritno                                                                                                                                                                                              |       | Pengadilan Negeri Ungaran    | Bebas (putusan sela)                              | 20 Desember 2007 |
| 166. | Dana APBD 2004                                                                                         | Rp965 juta      | Mantan Bupati Lima Puluh Kota periode 1999-2004, Alis Marajo, mantan Sekretaris Daerah Kabupaten Lima Puluh Kota Bachtar Bahar dan mantan Kepala Dinas Pekerjaan Umum, Pemukiman dan Penegembangan Daerah Mufti Warman Hasan |       | Pengadilan Negeri Payakumbuh | Bebas<br><u>Tuntutan Jaksa</u><br>5 tahun penjara | 6 Desember 2007  |

**Dokumentasi ICW:** diolah dari berbagai sumber media (Kompas, Media Indonesia, Jawa Pos, Republika, Seputar Indonesia, Suara Karya, Pikiran Rakyat, Suara Merdeka, Waspada, Surya, Bali Post, Kedaulatan Rakyat, Hukumonline, Tempointeraktif.com, Kapanlagi.com, PolitikIndonesia.com, Antara.News, Liputan6.com, Kominfo-Newsroom, Media Indonesia online, Riauinfa.com) selama periode 2007

### C. STATISTIK PERKARA DAN TERDAKWA

#### 1 Perkara dan Terdakwa

|                       |   |                        |
|-----------------------|---|------------------------|
| Jumlah perkara        | : | 166                    |
| Jumlah terdakwa       | : | 373                    |
| Nilai Kerugian Negara | : | <b>Rp 4,71 triliun</b> |

#### 2. Hukuman

| Vonis                            | Jumlah Terdakwa | Persentase (%) |
|----------------------------------|-----------------|----------------|
| <b>1. VONIS BEBAS/LEPAS</b>      | <b>212</b>      | 56,84          |
| <b>2. VONIS BERSALAH/PENJARA</b> |                 |                |
| • 6 bulan -1 tahun               | 66              | 17,69          |
| • 1,1 -2 tahun                   | 28              | 7,51           |
| • 2,1 -5 tahun                   | 44              | 11,79          |
| • 5,1-10 tahun                   | 21              | 5,63           |

|                   |            |            |
|-------------------|------------|------------|
| • Diatas 10 tahun | 2          | 0,54       |
| Jumlah            | <b>373</b> | <b>100</b> |

### 3. Aktor

| <b>Aktor</b>                   | <b>Jumlah<br/>Terdakwa</b> |
|--------------------------------|----------------------------|
| Anggota DPRD                   | 162                        |
| Swasta                         | 48                         |
| Staf BUMN                      | 30                         |
| Staf Dinas                     | 17                         |
| Kepala Dinas                   | 15                         |
| Anggota KPUD                   | 12                         |
| Bupati*                        | 11                         |
| Kepala Sekolah/ Pejabat Kampus | 9                          |
| Kepala/Staf Pertanahan         | 8                          |
| Staf Bea Cukai                 | 7                          |
| Lurah/Camat                    | 7                          |
| Staf Pemkab                    | 7                          |
| Walikota/Wakil Walikota*       | 6                          |
| Sekda Walikota                 | 5                          |
| Staf Departemen                | 5                          |
| Ketua/Wakil KUD                | 3                          |
| Staf Ahli Walikota/Bupati      | 3                          |
| Kepala Kantor Departemen       | 2                          |
| Kepala Bagian Pemkab           | 2                          |
| Jaksa                          | 2                          |
| Anggota Partai Politik         | 2                          |
| Gubernur*                      | 2                          |
| Militer                        | 1                          |
| KP2LN                          | 1                          |
| BPKD                           | 1                          |
| Sekda Bupati                   | 1                          |
| Kepala Rumah Sakit             | 1                          |
| Kabiro Provinsi                | 1                          |
| Kepala Bapeda                  | 1                          |

|               |            |
|---------------|------------|
| Pegawai Pos   | 1          |
| <b>Jumlah</b> | <b>373</b> |

\* Termasuk juga mantan.

#### **4. Tingkat Pengadilan**

|                   |   |             |
|-------------------|---|-------------|
| Pengadilan Negeri | : | 132 perkara |
| Pengadilan Tinggi | : | 18 perkara  |
| Mahkamah Agung    | : | 16 perkara  |

*Data dihimpun dan disusun oleh :*

Emerson Yuntho (bidang Hukum dan Monitoring Perradilan) dan Kadi (bidang Informasi Publik)

Catatan: jika jumlah halaman dinilai terlalu banyak, lampiran juga dapat hanya mencakup bagian **C, tentang STATISTIK PERKARA DAN TERDAKWA**

Lampiran 9

**Daftar Perkara Korupsi yang Telah Diperiksa dan Divonis Pengadilan Selama Tahun 2006**

| NO  | PERKARA                                                                                                                           | TERDAKWA                                                                                                                                                         | PENGADILAN                        | VONIS | WAKTU            |
|-----|-----------------------------------------------------------------------------------------------------------------------------------|------------------------------------------------------------------------------------------------------------------------------------------------------------------|-----------------------------------|-------|------------------|
| 1.  | Korupsi pengelembungan dana proyek pembangunan pembangkit listrik tenaga panas bumi Karaha Bodas, Garut, senilai Rp 1,431 triliun | Prianto, Kepala Divisi Panas Bumi Direktorat Eksplorasi Produksi, dan Syafei Sulaiman, Kepala Dinas Perencanaan Panas Bumi                                       | Pengadilan Negeri Jakarta Pusat   | Bebas | 24 Januari 2006  |
| 2.  | korupsi pencairan kasbon APBD oleh anggota DPRD Aceh Singkil senilai Rp 1.733.119.635                                             | H. Makmursyah Putra, SH, MM<br>Drs H Mu'adz Vohry, MM<br>H Ridwan Hasan, SH, MM<br>H Bicar Sinaga, SH, MM, (mantan kepala bagian keuangan Setdakab Aceh Singkil) | Pengadilan Negeri Aceh Singkil    | Bebas | 30 Januari 2006  |
| 3.  | korupsi pemberian kredit kepada PT Cipta Graha Nusantara (CGN) senilai Rp 160 miliar                                              | ECW Neloe, I Wayan Pugeg, dan M. Sholeh Tasripan (Mantan Direksi Bank Mandiri)                                                                                   | Pengadilan Negeri Jakarta Selatan | Bebas | 20 Februari 2006 |
| 4.  | korupsi pemberian kredit kepada PT Cipta Graha Nusantara (CGN) senilai Rp 160 miliar                                              | Edyson, Saiful Anwar, dan Diman Ponijan tiga pengurus PT Cipta Graha Nusantara                                                                                   | Pengadilan Negeri Jakarta Selatan | Bebas | 23 Februari 2006 |
| 5.  | korupsi pengadaan lahan TPU di Bekasi, yang mengakibatkan kerugian negara Rp 6,49 miliar                                          | Damanhuri Husein, Mantan Asisten Tata Praja Kabupaten Bekasi                                                                                                     | Pengadilan Negeri Bekasi          | Bebas | 22 Maret 2006    |
| 6.  | korupsi pengadaan logistik Pemilu 2004 di wilayah DKI Jakarta berjumlah Rp488,5 juta.                                             | A Riza Patria, Anggota Komisi Pemilihan Umum Daerah (KPUD) DKI Jakarta,                                                                                          | Pengadilan Negeri Jakarta Pusat   | Bebas | 28 April 2006    |
| 7.  | korupsi mark up pengadaan pakaian dinas dalam APBD Asahan tahun 2003 senilai Rp843,8 juta                                         | Risuddin, Bupati Asahan                                                                                                                                          | Pengadilan Negeri Kisaran         | Bebas | 6 Juli 2006      |
| 8.  | korupsi pembelian dua unit kapal LCT Sritanjung milik Pemkab Banyuwangi senilai Rp 15 miliar                                      | Masduki Soeod, Mantan Sekretaris Daerah (Sekda) Kabupaten Banyuwangi                                                                                             | Pengadilan Negeri Banyuwangi      | Bebas | 6 Juni 2006      |
| 9.  | Korupsi APBD NTB senilai Rp 17,5 miliar                                                                                           | 10 mantan anggota Panitia Anggaran (Panggar) DPRD NTB 1999-2004                                                                                                  | Pengadilan Negeri Mataram         | Bebas | 7 Juli 2006      |
| 10. | Korupsi Tata Niaga BBM di Pertamina Batam                                                                                         | Andi Zulkarnaen, Ketua Koperasi                                                                                                                                  | Pengadilan Negeri Batam           | Bebas | 26 Maret 2006    |
| 11. | Korupsi Tata Niaga BBM di Pertamina Batam                                                                                         | Waluyo, mantan wirausaha penjualan Pertamina Batam                                                                                                               | Pengadilan Negeri Batam           | Bebas | 15 Mei 2006      |
| 12. | Korupsi Tata Niaga BBM di Pertamina Batam                                                                                         | Nono Asmanu, mantan Kepala Pertamina Batam                                                                                                                       | Pengadilan Negeri Batam           | Bebas | 18 Mei 2006      |
| 13. | korupsi dana pemekaran Kabupaten Morowali                                                                                         | Andi Muhammad, bupati Morowali non aktif                                                                                                                         | Pengadilan Negeri Palu            | Bebas | 6 Juni 2006      |

| NO  | PERKARA                                                                                                                | TERDAKWA                                                                                                                                                                                                                                          | PENGADILAN                                 | VONIS                          | WAKTU             |
|-----|------------------------------------------------------------------------------------------------------------------------|---------------------------------------------------------------------------------------------------------------------------------------------------------------------------------------------------------------------------------------------------|--------------------------------------------|--------------------------------|-------------------|
| 14. | korupsi pembebasan lahan Kubangsari untuk lokasi pelabuhan umum senilai Rp 6,5 miliar.                                 | Rusli Ridwan, Wakil Wali Kota Cilegon                                                                                                                                                                                                             | Pengadilan Negeri Serang                   | Bebas                          | 7 Juli 2006       |
| 15. | korupsi pembebasan lahan milik Pemprov Sumsel kepada perusahaan swasta PT Bayu Jaya Lestasi Sukses senilai Rp 6 miliar | Nasiruddin, mantan Kepala Badan Pertanahan Nasional (BPN) Palembang                                                                                                                                                                               | Pengadilan Negeri Palembang                | Bebas                          | 20 Februari 2006  |
| 16. | korupsi penahanan Dana Provisi Sumber Daya Hutan dan Dana Reboisasi Kapuas Hulu 2001/2002 senilai Rp 14 miliar         | Drs H Abang Tambul Husin, Bupati Kapuas Hulu                                                                                                                                                                                                      | Pengadilan Negeri Putussibau Kalbar        | Bebas (Dakwaan tidak diterima) | 26 September 2006 |
| 17. | korupsi pengusaan lahan hutan lindung oleh PT Torganda                                                                 | DL Sitorus                                                                                                                                                                                                                                        | Pengadilan Tinggi DKI Jakarta              | Bebas (Dakwaan Prematur)       | 11 Oktober 2006   |
| 18. | korupsi anggaran DPRD Bali 1999-2004 dengan kerugian negara Rp 6,739 miliar.                                           | 15 terdakwa Anggota DPRD Bali (Sumardika, Nyoman Parta, Ketut Nuriya, Made Wiryana, Made Suryana, Dewa Nyoman Juwita, Wayan Widiadnyana, Wayan Danta, Ketut Sandiasa, Wayan Murdana, Ketut Suherli, Putu Bagiasna, Abdul Wahab dan Wayan Sutika). | Pengadilan Negeri Denpasar                 | Bebas                          | 28 September 2006 |
| 19. | Korupsi pengadaan kapal penyeberangan KM Feri Taka Bonerate                                                            | Ince Langke, H. Pattasuru, dan Yohanes S.P. Ince Langke Mantan anggota DPRD Selayar                                                                                                                                                               | Pengadilan Negeri Selayar Sulawesi Selatan | Bebas                          | 14 Agustus 2006   |
| 20. | korupsi kredit usaha tani Rp 2,8 miliar                                                                                | Ahmad Nadir, kini Ketua DPRD Gresik, Jawa Timur                                                                                                                                                                                                   | Pengadilan Negeri Gresik                   | Bebas                          | 16 Oktober 2006   |
| 21. | korupsi impor beras ilegal 60.000 ton dari Vietnam                                                                     | Sinta Dewi, Pegawai Bea Cukai                                                                                                                                                                                                                     | Pengadilan Negeri Jakarta Utara            | Bebas                          | 11 Oktober 2006   |
| 22. | korupsi pungutan Dana Reboisasi dan Provisi Sumberdaya Hutan (DR-PSDH) senilai Rp88 miliar                             | Masdjuni, mantan Bupati Berau Kaltim                                                                                                                                                                                                              | Pengadilan Negeri Berau                    | Bebas                          | 12 September      |
| 23. | korupsi kredit usaha tani Rp 2,8 miliar                                                                                | Ahmad Nadir, Ketua DPRD Gresik                                                                                                                                                                                                                    | Pengadilan Negeri Gresik                   | Bebas/Lepas                    | 15 Oktober 2006   |
| 24. | Korupsi dana bantuan untuk Poso senilai Rp 4,038 miliar                                                                | AM Azikin Suyuti, Kepala Dinas Kesejahteraan Sulawesi Tengah                                                                                                                                                                                      | Pengadilan Negeri Jakarta Pusat            | Bebas                          | 19 Oktober 2006   |
| 25. | Korupsi proyek rehabilitasi 28 sekolah dasar dan madrasah ibtidaiyah senilai Rp 2 miliar                               | Mansyur T, mantan Kepala Dinas Pendidikan Mejene dan Pimpinan Pengendali Kegiatan Dinas Pendidikan dan Kebudayaan Majene Hilal Ibrahim                                                                                                            | Pengadilan Negeri Majene, Sulawesi Barat   | Bebas                          | 14 Oktober 2006   |
| 26. | Korupsi dana APBD Bulukumba tahun 2003 senilai Rp 1 miliar lebih                                                       | Adnan Manaf, Mantan Ketua DPRD Bulukumba dan Sudirman, mantan Wakil Ketua DPRD periode 1999-2004                                                                                                                                                  | Pengadilan Negeri Bulukumba                | Bebas                          | 7 September 2006  |



| NO  | PERKARA                                                                                                                                 | TERDAKWA                                                                                                                                                                     | PENGADILAN                               | VONIS   | WAKTU             |
|-----|-----------------------------------------------------------------------------------------------------------------------------------------|------------------------------------------------------------------------------------------------------------------------------------------------------------------------------|------------------------------------------|---------|-------------------|
| 27. | Korupsi proyek pengadaan tanah untuk perkantoran Pemkot Prabumulih dan RSUD di Kecamatan Prabumulih Timur senilai Rp 3,005 miliar       | Rachman Djalili, Wali Kota Prabumulih                                                                                                                                        | Pengadilan Negeri Muara Enim             | Bebas   | 22 November 2006  |
| 28. | Korupsi dalam penyaluran dana beasiswa di Kota Semarang senilai Rp 1,2 miliar                                                           | Sujoko, Mantan Kepala Dinas Pendidikan Kota Semarang dan Heru Supriyono, mantan Wakil Kepala Dinas Pendidikan Kota Semarang                                                  | Pengadilan Negeri Semarang               | Bebas   | 15 Agustus 2006   |
| 29. | Korupsi di dinas pendapatan daerah Kabupaten Sinjai senilai Rp980 juta                                                                  | Syamsul Qamar AR, Mantan Kadispenda Sinjai                                                                                                                                   | Pengadilan Negeri Sinjai                 | Bebas   | 29 Agustus 2006   |
| 30. | Korupsi Dana APBD Cilacap senilai Rp3,2 miliar                                                                                          | Adi Saroso, mantan Sekretaris Daerah Cilacap, Jawa Tengah                                                                                                                    | Pengadilan Negeri Cilacap                | Bebas   | 21 November 2006  |
| 31. | Korupsi dana purnabakti DPRD Kabupaten Kepulauan Sangehe Sulut                                                                          | Piet, Alex, Anwar dan Jhon Empat mantan Pimpinan DPRD Kabupaten Kepulauan Sangehe                                                                                            | Pengadilan Negeri Tahuna                 | Bebas   | 1 November 2006   |
| 32. | Korupsi dana pelatihan kepribadian Bank Jateng 2003-2004 senilai Rp 2,8 miliar                                                          | Wirawan, mantan Kabiro Sumber Daya Manusia Bank Jateng                                                                                                                       | Pengadilan Tinggi Pekanbaru              | Bebas   | 4 Desember 2006   |
| 33. | Korupsi dana tak terduga APBD Kampar senilai Rp14 miliar.                                                                               | H Zulher MS, Sekretaris Daerah non-aktif Kabupaten Kampar                                                                                                                    | Pengadilan Tinggi Pekanbaru              | Bebas   | 1 Desember 2006   |
| 34. | Korupsi pengadaan KM Takabonerate senilai Rp4 miliar                                                                                    | HM Akib Patta (mantan Bupati Selayar), Ince Langke (mantan Ketua DPRD) Selayar, Djenewali Rachim, S Sos, Salewang Syamsualang (Direktur PT SUC) dan Rosman SE (anggota DPRD) | Pengadilan Tinggi Makassar               | Bebas   | 13 Desember 2006  |
| 35. | Korupsi penjualan gula di PT Perkebunan Nusantara (PTPN) XIV senilai Rp 2,25 miliar                                                     | Damayanto Sutejo, direktur pemasaran PT Perkebunan Nusantara (PTPN) XIV                                                                                                      | Pengadilan Negeri Makassar               | Bebas   | 21 Desember 2006  |
| 36. | Korupsi dana APBD Prov. Bali senilai Rp 13,332 miliar                                                                                   | 22 mantan anggota DPRD Bali                                                                                                                                                  | Pengadilan Negeri Denpasar               | Bebas   | 21 Desember 2006  |
| 37. | Korupsi dana APBD tahun 2001-2003 senilai Rp 6,6 miliar                                                                                 | 16 mantan anggota DPRD Garut                                                                                                                                                 | Pengadilan Negeri Garut                  | Bebas   | 21 Desember 2006  |
| 38. | Korupsi Dana APBD Cilacap 2004 senilai Rp3,2 miliar                                                                                     | Fran Lukman, Ketua DPRD Cilacap, Jawa Tengah                                                                                                                                 | Pengadilan Negeri Cilacap                | Bebas   | 21 Desember 2006  |
| 39. | Korupsi dana bantuan Departemen Agama RI sebesar Rp. 1,951 miliar                                                                       | Burhanuddin Hasibuan                                                                                                                                                         | Pengadilan Negeri Padang Sidempuan Sumut | Bebas   | 12 September 2006 |
| 40. | Korupsi penjualan lahan, eks gudang farmasi, dan gedung bekas kantor Dinas Kesehatan Makassar yang merugikan negara sebesar Rp 635 juta | Amiruddin Maula, Wali Kota Makassar, Sulawesi Selatan, periode 1999-2004,                                                                                                    | Pengadilan Negeri Makassar               | Bebas   | 27 Desember 2006  |
| 41. | Korupsi dana bantuan                                                                                                                    | Haris Muda Siregar dan Rustam                                                                                                                                                | Pengadilan Negeri                        | 3 tahun | 12                |

| NO  | PERKARA                                                                                                                       | TERDAKWA                                                                               | PENGADILAN                        | VONIS                   | WAKTU            |
|-----|-------------------------------------------------------------------------------------------------------------------------------|----------------------------------------------------------------------------------------|-----------------------------------|-------------------------|------------------|
|     | Departemen Agama RI sebesar Rp. 1,951 miliar                                                                                  | Efendi Nasution (anggota DPRD Padang Sidempuan Sumut)                                  | Padang Sidempuan Sumut            | penjara                 | September 2006   |
| 42. | Korupsi Dana APBD Kab. Banggai senilai Rp. 3,1 milyar                                                                         | Drs. H. Djar'un Sibay Ketua DPRD Banggai periode 1999-2004                             | Pengadilan Negeri Banggai         | 2 tahun 6 bulan penjara | 8 November 2006  |
| 43. | Korupsi Dana APBD Kab. Banggai senilai Rp. 3,1 milyar                                                                         | Rambli Mbani, Suryanto dan Yusman Rahim, Mantan Anggota DPRD Banggai periode 1999-2004 | Pengadilan Negeri Banggai         | 2 tahun penjara         | 8 November 2006  |
| 44. | Korupsi Dana Asosiasi Pengusaha Hutan Indonesia (APHI) senilai Rp. 95 milyar dan USD 5,6 juta                                 | Adiarsita (Ketua APHI), HA Fattah, (wakil APHI), dan Yusran Sharif (bendahara APHI)    | Mahkamah Agung                    | 6 tahun penjara         | 3 Mei 2006       |
| 45. | Korupsi dana tak terduga APBD Kampar senilai Rp14 miliar.                                                                     | H Zulher MS, Sekretaris Daerah (Sekda) non-aktif Kabupaten Kampar                      | Pengadilan Negeri Bangkinang Riau | 5 tahun penjara         | 2 November 2006  |
| 46. | Korupsi dana APBD periode 1999-2004 senilai Rp 4,7 miliar                                                                     | Wayan Sutena, Ketua DPRD kabupaten Klungkung                                           | Pengadilan Negeri Klungkung       | 15 bulan penjara        | 19 Desember 2006 |
| 47. | Korupsi dana APBD Kota Sukabumi tahun 2002 dan 2004 senilai Rp 2,05 miliar                                                    | M Faqih Abdurahman, Mantan Wakil Ketua Dewan Perwakilan Rakyat Daerah Kota Sukabumi    | Pengadilan Negeri Sukabumi        | 3 tahun penjara         | 11 Desember 2006 |
| 48. | Korupsi dana bantuan mobilisasi senilai Rp 1,9 miliar.                                                                        | Maman Sulaeman, Mantan Bupati Sukabumi                                                 | Pengadilan Negeri Cibadak         | 4 tahun penjara         | 12 Desember 2006 |
| 49. | Korupsi Proyek Pembangunan Dermaga Ponton (PPDP) di Desa Samaran, Kecamatan Pauh, Kabupaten Sarolangun senilai Rp 2,3 miliar. | Suhardi alias Ayong bin Daud Leman                                                     | Mahkamah Agung                    | 6 tahun penjara         | 5 Juni 2006      |
| 50. | Korupsi dalam penerbitan surat keputusan pembebasan bea masuk impor untuk 15 importir selama periode jabatannya, 1996-1998    | Soehardjo, bekas Direktur Jenderal Bea-Cukai                                           | Pengadilan Negeri Jakarta Utara   | 1 tahun penjara         | 17 Desember 2006 |
| 51. | Korupsi dana bantuan untuk Poso senilai Rp 4,038 miliar                                                                       | Rusmi Widyowati dkk (pelaksana proyek bantuan berjumlah 8 orang)                       | Pengadilan Negeri Jakarta Pusat   | 1 tahun penjara         | 19 Oktober 2006  |
| 52. | Korupsi APBD Kota Depok senilai Rp 7,3 miliar                                                                                 | 17 anggota Dewan Perwakilan Rakyat Daerah Depok periode 1999-2004                      | Pengadilan Negeri Cibinong        | 2 tahun penjara         | 24 Januari 2006  |
| 53. | Korupsi pengadaan mobil transportasi Pekan Olahraga Nasional XVI 2004 di Sumatera Selatan senilai Rp 200 juta                 | Sain Candra, Direktur CV Candra Jaya Transport                                         | Pengadilan Negeri Palembang       | 4 tahun 6 bulan         | 17 Januari 2006  |
| 54. | Korupsi dana pengadaan armada mobil transportasi PON XVI 2004 senilai Rp 1,46 miliar.                                         | Amir Syarifuddin, bekas Kepala Dinas Perhubungan Sumatera Selatan                      | Pengadilan Negeri Palembang       | 4 tahun penjara         | Januari 2006     |
| 55. | Korupsi pajak penghasilan                                                                                                     | A Irwan Tjahjadi, Direktur CV Hasrat                                                   | Pengadilan Negeri                 | 2 tahun                 | 4 Januari        |

| NO  | PERKARA                                                                                                   | TERDAKWA                                                                                                                                                                       | PENGADILAN                        | VONIS                                         | WAKTU            |
|-----|-----------------------------------------------------------------------------------------------------------|--------------------------------------------------------------------------------------------------------------------------------------------------------------------------------|-----------------------------------|-----------------------------------------------|------------------|
|     | dan pajak pertambahan nilai tahun 2001 senilai lebih dari Rp 10 miliar                                    |                                                                                                                                                                                | Banjarmasin                       | penjara                                       | 2006             |
| 56. | Korupsi dana pemilu senilai Rp 520.456.983                                                                | Bupati Temanggung nonaktif Totok Ary Prabowo                                                                                                                                   | Pengadilan Tinggi Jawa Tengah     | 4 tahun penjara                               | 2 Januari 2006   |
| 57. | Korupsi pengadaan barang/jasa di Pemerintah Kota Bandung dirugikan Rp 303 juta.                           | Maman Hermawan, Mantan Kepala Bagian Umum Pemerintah Kota Bandung bersama M Iskandar, Kepala Subbagian Rumah Tangga dan Obay Sobari, Kepala Subbagian Sandi dan Telekomunikasi | Pengadilan Negeri Bandung         | 18 bulan penjara                              | 5 Januari 2006   |
| 58. | Korupsi dana DPRD TA 2002, dari APBD Kota Bogor, yang merugikan keuangan negara senilai Rp 6, 164 miliar. | Mochammad Sahid, Mantan Ketua DPRD Kota Bogor dan saat ini menjabat Wakil Wali Kota Bogor.                                                                                     | Pengadilan Negeri Bogor           | 4 Tahun penjara                               | 26 Januari 2006  |
| 59. | Korupsi di Bank DKI Cabang Pembantu Tebet Barat senilai Rp3,5 miliar                                      | Dwi Norman Putranto, karyawan Bank DKI Cabang Pembantu Tebet Barat Dalam                                                                                                       | Pengadilan Negeri Jakarta Selatan | 7 tahun penjara                               | 30 Januari 2006  |
| 60. | Korupsi APBD Kabupaten Garut                                                                              | Dedi Suryadi (Ketua DPRD Garut periode 2004-2009), Iyos Somantri (anggota DPRD Provinsi Jabar), Mahyar Suara (Staf Ahli Bupati Garut Bidang Hukum) dan Encep Mulyana           | PT Bandung                        | 4 tahun penjara                               | 9 Februari 2006  |
| 61. | Korupsi proyek Jalan Tol Lingkar Luar Jakarta di bagian selatan                                           | Hamid Djiman                                                                                                                                                                   | Pengadilan Negeri Jakarta Timur   | 14 tahun penjara                              | 13 Februari 2006 |
| 62. | Korupsi APBD Kalimantan Timur senilai kerugian negara Rp 3,4 miliar                                       | Kasyful Anwar Asad Mantan Wakil Ketua DPRD Kalimantan Timur periode 1999- 2004                                                                                                 | Pengadilan Negeri Samarinda       | 4 tahun penjara.                              | 16 Februari 2006 |
| 63. | Korupsi penggunaan Dana Abadi Umat dan Biaya Penyelenggaraan Ibadah Haji                                  | Said Agil, Mantan Menteri Agama                                                                                                                                                | Pengadilan Negeri Jakarta Pusat   | 5 tahun penjara                               | 7 Februari 2006  |
| 64. | Korupsi penggunaan Dana Abadi Umat dan Biaya Penyelenggaraan Ibadah Haji                                  | Taufiq Kamil Mantan Direktur Jenderal Bimas Islam dan Penyelenggaraan Haji (BPIH) Departemen Agama                                                                             | Pengadilan Negeri Jakarta Pusat   | 4 tahun penjara                               | 7 Februari 2006  |
| 65. | Korupsi bantuan pemilu Rp 520 juta                                                                        | Totok Ary Prabowo, Bupati Temanggung non-aktif                                                                                                                                 | Mahkamah Agung                    | 4 tahun penjara                               | 9 Maret 2006     |
| 66. | Korupsi pembangunan dermaga pontoon menyebabkan kerugian negara Rp 2 miliar                               | HM Madel, Bupati Sarolangun                                                                                                                                                    | Pengadilan negeri Bangko          | 1 tahun penjara                               | 14 Februari 2006 |
| 67. | Korupsi di DPRD Kaltim tahun 2001-2002-2003                                                               | H Sukardi Djarwo Putro (mantan Ketua DPRD Kaltim) dan H Khairul Fuad (wakil)                                                                                                   | Pengadilan Negeri Samarinda       | 7 tahun 5 bulan penjara                       | 20 Februari 2006 |
| 68. | Korupsi pengadaan kapal penyeberangan Feri Taka Bonerate di Kabupaten Selayar, Sulawesi Selatan           | M. Akib Patta Mantan Bupati Selayar, Sulawesi Selatan, periode 2000-2005                                                                                                       | Pengadilan Negeri Makassar        | 3 tahun penjara                               | 9 Maret 2006     |
| 69. | korupsi pengadaan logistik Pemilu 2004 di wilayah DKI Jakarta berjumlah Rp488,5 juta                      | M Taufik, Ketua KPUD DKI Jakarta dan Neneng                                                                                                                                    | Pengadilan Negeri Jakarta Pusat   | M Taufik divonis 18 bulan dan Neneng 15 bulan | -                |
| 70. | korupsi dana pada pos dana penunjang kegiatan dewan senilai Rp 2 miliar.                                  | Thomas Neno Siki, Samson Faggidae, Magdalena Wake Hia, Radja Kudji Hernimus, Thimotius                                                                                         | Pengadilan Negeri Kupang          | 1 tahun penjara                               | 24 April 2006    |

| NO  | PERKARA                                                                                                     | TERDAKWA                                                                                                                                             | PENGADILAN                          | VONIS                   | WAKTU                 |
|-----|-------------------------------------------------------------------------------------------------------------|------------------------------------------------------------------------------------------------------------------------------------------------------|-------------------------------------|-------------------------|-----------------------|
|     |                                                                                                             | Nitbani, Budi Sutikno dan Dominggus Aprilius Hiku. (Ketujuh mantan anggota DPRD Kabupaten Kupang)                                                    |                                     |                         |                       |
| 71. | korupsi Bank Mandiri senilai Rp 38,62 miliar.                                                               | Nader Taher, mantan Direktur Utama PT Siak Jamrud Pusako                                                                                             | Pengadilan Tinggi Riau              | 7 tahun penjara         | 22 Maret 2006 (kabur) |
| 72. | korupsi dana APBD senilai Rp 10,4 miliar.                                                                   | 40 mantan anggota DPRD Kota Padang                                                                                                                   | Pengadilan Tinggi Sumatera Barat    | 4 tahun penjara         | 12 April 2006         |
| 73. | korupsi di SPBU Tingkir Salatiga sekitar Rp 10,3 miliar.                                                    | Ibnu Sudjoko                                                                                                                                         | Pengadilan Tinggi Jateng            | 8 tahun penjara         | 28 April 2006         |
| 74. | korupsi di SPBU Tingkir Salatiga sekitar Rp 10,3 miliar                                                     | Mardiono, pengelola SPBU Tingkir dari Pemerintah Kota Salatiga                                                                                       | Pengadilan Tinggi Jateng            | 14 bulan penjara        | 28 April 2006         |
| 75. | korupsi dana anggaran DPRD Kab. Ciamis, tahun anggaran (TA) 2001/2002 mencapai Rp 5,2 miliar                | H. Dedi Soebandi Wakil Bupati Ciamis, Nasuha, mantan Wakil Sekretaris Anggaran, dan Djajuli, mantan Sekwan.                                          | Pengadilan Tinggi Bandung           | 4 tahun penjara         | 24 Januari 2006       |
| 76. | korupsi bantuan kerbau                                                                                      | Masdin Adfat cs                                                                                                                                      | Pengadilan Negeri Takengon          | 4 tahun penjara         | 22 Februari 2006      |
| 77. | korupsi proyek Gerhan Rp 13 miliar lebih.                                                                   | Amrisal Abidin                                                                                                                                       | Pengadilan Negeri Watampone         | 16 bulan penjara        | April 2006 (cek lagi) |
| 78. | korupsi dalam pengadaan pipa senilai Rp 67 juta.                                                            | YR Purnomo Dwi Ariyanto, mantan direktur teknik PDAM Sleman                                                                                          | Pengadilan Negeri Sleman            | 1 tahun                 | 22 April 2006         |
| 79. | korupsi APBD Kota Kendari                                                                                   | 23 anggota DPRD Kota Kendari                                                                                                                         | Pengadilan Tinggi Sulawesi Tenggara | 2 tahun penjara         | 29 maret 2006         |
| 80. | korupsi APBD 2003 senilai Rp 14 miliar                                                                      | Dharmono (Ketua DPRD Banten 2001-2004 yang kini menjadi anggota Komisi VI DPR) dan Mufrodi Muchsin dan Muslim Djamaludi (mantan anggota DPRD Banten) | Mahkamah Agung                      | 4 tahun 6 bulan penjara | Maret 2006            |
| 81. | Korupsi di Jamsostek senilai Rp 66,625 miliar                                                               | Andy Rachman Alamsyah, Mantan Direktur Investasi PT Jamsostek                                                                                        | Pengadilan Negeri Jakarta Selatan   | 7 tahun penjara         | 19 April 2006         |
| 82. | Korupsi di Jamsostek senilai Rp 66,625 miliar                                                               | Achmad Djunaidi mantan Direktur Utama PT Jamsostek                                                                                                   | Pengadilan Negeri Jakarta Selatan   | 8 tahun penjara         | 19 April 2006         |
| 83. | korupsi dana APBD Kota Solo tahun 2003 yang mengakibatkan kerugian negara lebih dari Rp 4,272 miliar        | Soemarlani Djatmiko, mantan Sekretaris DPRD Kota Solo                                                                                                | Pengadilan Negeri Surakarta         | 18 bulan penjara        | 16 Mei 2006           |
| 84. | korupsi pemberian kredit sehingga merugikan negara senilai Rp4,3 miliar                                     | Gita Yurnalisa, Relation Manager PT Bank BNI Wilayah 12 Jakarta Kota                                                                                 | Pengadilan Negeri Jakarta Barat     | 7 tahun penjara         | 9 Mei 2006            |
| 85. | korupsi Biaya Penyelenggaraan Ibadah Haji (BPIH) dan Dana Abadi Umat (DAU)                                  | Said Agil Husin Al Munawar, mantan Menteri Agama                                                                                                     | Pengadilan Tinggi DKI Jakarta       | 7 tahun penjara         | 19 April 2006         |
| 86. | korupsi Biaya Penyelenggaraan Ibadah Haji (BPIH) dan Dana Abadi Umat (DAU)                                  | Taufik Kamil, Direktur Jenderal Bimbingan Masyarakat Islam dan Penyelenggaraan Haji Departemen Agama                                                 | Pengadilan Tinggi DKI Jakarta       | 5 tahun penjara         | 19 April 2006         |
| 87. | korupsi proyek Export Oriented (Exor) I Pertamina di Balongan. yang merugikan negara 189,58 juta dollar AS. | Tabrani Ismail mantan Direktur Pengolahan Pertamina                                                                                                  | Mahkamah Agung                      | 6 tahun                 | 26 April 2006         |

| NO  | PERKARA                                                                                                                                                                                                                      | TERDAKWA                                                                                                                                                                                               | PENGADILAN                        | VONIS                   | WAKTU             |
|-----|------------------------------------------------------------------------------------------------------------------------------------------------------------------------------------------------------------------------------|--------------------------------------------------------------------------------------------------------------------------------------------------------------------------------------------------------|-----------------------------------|-------------------------|-------------------|
| 88. | korupsi APBD Kabupaten Nganjuk senilai Rp 9,3 miliar                                                                                                                                                                         | Didik Yudianto Bekas Ketua Panitia Anggaran DPRD Nganjuk, Jawa Timur serta Kasim, Mohammad Fathoni, Hariyono dan Bambang Puguh Tjiptoadi (Anggota DPRD Nganjuk periode 1999-2004)                      | Pengadilan Negeri Nganjuk         | 1,5 tahun penjara       | 30 Mei 2006       |
| 89. | korupsi pemotongan dana pinjaman untuk diberikan kepada petani, senilai Rp 422 juta di Gorontalo                                                                                                                             | Ahmad Sulaiman, mantan Kepala BIPP Gorontalo dan Hamzah Yusuf Sekretaris Daerah Gorontalo serta Kalsum Yusuf Bendahara LSM KTNA Bersemi                                                                | Mahkamah Agung                    | 4 tahun penjara         | 1 Juni 2006       |
| 90. | Korupsi dana operasional KPU dalam penyelenggaraan Pemilihan Umum 2004 senilai Rp 55 juta                                                                                                                                    | Heru Ismianto Permana, Ketua Komisi Pemilihan Umum Kabupaten Banyumas                                                                                                                                  | Pengadilan Negeri Purwokerto      | 1 tahun 2 bulan penjara | 15 Juni 2006      |
| 91. | korupsi di PT Brocolin Internasional yang terkait dengan pembobolan BNI Cabang Kebayoran Baru.                                                                                                                               | Suharna, Direktur Brocolin, Marhaeni Atmandiah, sekretaris perusahaan Brocolin, Agus Julianto, Kepala Keuangan Brocolin                                                                                | Pengadilan Negeri Jakarta Selatan | 4 tahun                 | 15 Juni 2006      |
| 92. | korupsi dana APBD 2003 senilai Rp14 miliar                                                                                                                                                                                   | Djoko Munandar, Gubernur Banten non aktif                                                                                                                                                              | Pengadilan Tinggi Banten          | 2 tahun                 | 12 Juni 2006      |
| 93. | Korupsi pencairan L/C fiktif PT Gramarindo Group pada Bank Negara Indonesia (BNI) Kebayoran Baru senilai Rp49,2 miliar dan 2,99 juta dollar AS dari total Rp1,9 triliun. (Perkara pembobolan Bank BNI Cabang kebayoran Baru) | Dicky Iskandar Dinata, Mantan Dirut PT Brocollin International                                                                                                                                         | Pengadilan Negeri Jakarta Selatan | 20 tahun penjara        | 20 Juni 2006      |
| 94. | Korupsi suap pemeriksaan perkara pembobolan Bank BNI Cabang Kebayoran Baru                                                                                                                                                   | Komisaris Besar Polisi Irman Santosa, Mantan Kepala Unit II Ekonomi Khusus Badan Reserse Kriminal Polri, yang juga ketua tim penyidik perkara letter of credit (L/C) fiktif BNI Cabang Kebayoran Baru, | Pengadilan Negeri Jakarta Selatan | 2 tahun 8 bulan         | 29 Juni 2006      |
| 95. | Korupsi suap pemeriksaan perkara pembobolan Bank BNI Cabang Kebayoran Baru                                                                                                                                                   | Brigadir Jenderal Polisi Samuel Ismoko, mantan Direktur II Ekonomi Khusus Badan Reserse Kriminal                                                                                                       | Pengadilan Negeri Jakarta Selatan | 20 bulan penjara        | 26 September 2006 |
| 96. | Korupsi suap pemeriksaan perkara pembobolan Bank BNI Cabang Kebayoran Baru                                                                                                                                                   | Komisaris Jenderal Suyitno Landung, Mantan Kepala Badan Reserse Kriminal Polri                                                                                                                         | Pengadilan Negeri Jakarta Selatan | 18 bulan penjara        | 10 Oktober 2006   |
| 97. | Korupsi pemerasan dalam pemeriksaan perkara korupsi Jamsostek senilai 200 juta rupiah saksi perkara PT Jamsostek Walter Sigalingging                                                                                         | Herman Allositandi, Hakim PN Jakarta Selatan                                                                                                                                                           | Pengadilan Negeri Jakarta Selatan | 4 tahun 6 bulan         | 26 Juni 2006      |
| 98. | Korupsi pemerasan dalam pemeriksaan perkara korupsi Jamsostek senilai 200 juta rupiah saksi perkara PT Jamsostek Walter Sigalingging                                                                                         | Andry Djemi Lumanauw, panitera PN Jakarta Selatan                                                                                                                                                      | Pengadilan Negeri Jakarta Selatan | 4 tahun                 | 26 Juni 2006      |
| 99. | korupsi pupuk bersubsidi Pupuk Kalimantan Timur                                                                                                                                                                              | Hairun (distributor pupuk PT Perusahaan Perdagangan Indonesia)                                                                                                                                         | Pengadilan Negeri Balikpapan      | 4 tahun                 | 3 Mei 2006        |

| NO   | PERKARA                                                                                                                                | TERDAKWA                                                                                                                           | PENGADILAN                          | VONIS                   | WAKTU        |
|------|----------------------------------------------------------------------------------------------------------------------------------------|------------------------------------------------------------------------------------------------------------------------------------|-------------------------------------|-------------------------|--------------|
|      | (PKT) senilai Rp871 juta                                                                                                               | dan Yan Basrian (pimpinan PT Daun Buah Bontang)                                                                                    |                                     |                         |              |
| 100. | korupsi pupuk bersubsidi Pupuk Kalimantan Timur (PKT) senilai Rp871 juta                                                               | Sukadi, Marwan Marzuki, dan Firmansyah (Bagian Pemasaran PKT)                                                                      | Pengadilan Negeri Balikpapan        | 2 tahun 6 bulan         | 4 Mei 2006   |
| 101. | korupsi pupuk bersubsidi Pupuk Kalimantan Timur (PKT) senilai Rp871 juta                                                               | Suhantoro direktur Gudang PT Bhanda Graha Rekza (BGR) Kariangau                                                                    | Pengadilan Negeri Balikpapan        | 4 tahun                 | 4 Mei 2006   |
| 102. | Korupsi dana APBD Kota Tebing 2004 dalam pos asuransi anggota DPRD                                                                     | H Sutoyo, Mantan Wakil Ketua DPRD Tebingtinggi periode 1999-2004                                                                   | Pengadilan Negeri Tebingtinggi-Deli | 1 tahun, 6 bulan        | 17 Mei 2006  |
| 103. | korupsi dana perjalanan dinas tahun anggaran 2003 senilai Rp 1,4 miliar                                                                | Karolus Agato, mantan bendaharawan di Setkab Sikka                                                                                 | Pengadilan Negeri Maumere           | 3 tahun penjara         | 5 Juli 2006  |
| 104. | korupsi dana penelitian mahasiswa PPs Unhas selama dua periode yakni 1997-1998 dan periode 1999-2002 senilai tepatnya Rp 1.063.535.910 | Dr Saharuddin Kadir MSc, Mantan Asisten Direktur II Program Pascasarjana (PPs) Universitas Hasanuddin                              | Pengadilan Negeri Makassar          | 4 tahun penjara         | 26 Juni 2006 |
| 105. | Korupsi tiga laboratorium Unpatti                                                                                                      | Ir. Wolter Tomasso                                                                                                                 | Pengadilan Negeri Ambon             | 1 tahun penjara         | 19 Juni 2006 |
| 106. | korupsi Proyek Gerhan TA 2004 merugikan keuangan negara senilai 2,5 Milyar                                                             | Ir. Muhono, mantan Kepala Dinas Kehutanan (Kadishut) Kabupaten Muara Enim                                                          | Pengadilan Negeri Muara Enim        | 14 Bulan penjara        | 19 juni 2006 |
| 107. | korupsi dana asuransi anggota DPRD Kabupaten Subang tahun 2004 senilai Rp 136.400.000                                                  | Bambang Herdadi, Ketua DPRD Kabupaten Subang                                                                                       | Pengadilan Negeri Subang            | 1 tahun penjara         | 6 Juli 2006  |
| 108. | Korupsi pada pemberian dana talangan 68 kios Pasar Kadungora senilai Rp 724 juta                                                       | Djohan Kustiaman, S.H., Mantan Kepala Dinas (Kadis) Pasar Kab. Garut                                                               | Pengadilan Negeri Garut             | 1 tahun penjara         | 19 Juni 2006 |
| 109. | Korupsi pada pemberian dana talangan 68 kios Pasar Kadungora senilai Rp 724 juta                                                       | Dudung Tajudin, Ketua Koperasi Pasar Laksana Jaya dan Soleh Abdul Yoman, Manajer Pasar Laksana Jaya.                               | Pengadilan Negeri Garut             | 1 tahun penjara         | 19 Juni 2006 |
| 110. | korupsi pengadaan rambu-rambu air penunjuk arah Sungai Tulangbawang menyebabkan kerugian negara senilai Rp16.399.780                   | Tajuddin Barto, Kepala Dinas Perhubungan Tulang Bawang Lampung                                                                     | Pengadilan Negeri Menggala          | 1 tahun penjara         | 7 Juli 2006  |
| 111. | korupsi pembobolan BNI 46 cabang Kebayoran Baru senilai Rp1,3 triliun                                                                  | Yoke Yola Sigar, direktur Adhitya Putra Pratama Finance, PT Grahasali Pratama, dan PT Bima Mandala Dirga                           | Pengadilan Negeri Jakarta Selatan   | 6 tahun penjara         | 21 Juni 2006 |
| 112. | korupsi APBD Kabupaten Donggala                                                                                                        | Ridwan Yalidjama, Allobua Rangan, Ventje Dj. Sumakul, Muh Anwar Muthaher, Awaluddin Husen Arep (mantan Anggota DPRD Kab. Donggala) | Pengadilan Tinggi Palu              | 4 tahun penjara         | 4 Maret 2006 |
| 113. | korupsi pembelian dua unit kapal LCT Sritanjung milik Pemkab Banyuwangi senilai Rp 15 miliar                                           | Samsul Hadi, Mantan Bupati Banyuwangi                                                                                              | Pengadilan Negeri Banyuwangi        | 1 tahun 5 bulan penjara | 2 Maret 2006 |
| 114. | Korupsi APBD Kabupaten Donggala                                                                                                        | Sutomo Borman dan Ketut Mardika (mantan Anggota DPRD Kab. Donggala)                                                                | Pengadilan Tinggi Palu              | 4 tahun penjara         | 4 Maret 2006 |
| 115. | korupsi APBD Jateng 2003                                                                                                               | Asrofi (mantan Ketua PRT), Suyatno                                                                                                 | Pengadilan Tinggi                   | 1 tahun                 | 1 Juni       |

| NO   | PERKARA                                                                                                                                              | TERDAKWA                                                                                                                                                                                                                                                                                                                                         | PENGADILAN                            | VONIS                                                  | WAKTU            |
|------|------------------------------------------------------------------------------------------------------------------------------------------------------|--------------------------------------------------------------------------------------------------------------------------------------------------------------------------------------------------------------------------------------------------------------------------------------------------------------------------------------------------|---------------------------------------|--------------------------------------------------------|------------------|
|      | senilai Rp 14,8 miliar                                                                                                                               | SW (mantan Sekretaris PRT), dan Wahono Ilyas (mantan Wakil Ketua PRT)                                                                                                                                                                                                                                                                            | Jawa Tengah                           | penjara                                                | 2006             |
| 116. | korupsi Proyek Pembangunan Dermaga Ponton (PPDP) di Desa Samaran, Kecamatan Pauh, Sarolangun tahun anggaran 2003                                     | Bambang Irianto, Bendahara Proyek                                                                                                                                                                                                                                                                                                                | Pengadilan Negeri Sarolangun          | 1 tahun penjara                                        | Juli 2006        |
| 117. | korupsi APBD Jateng 2003 senilai Rp 14,8 miliar                                                                                                      | Mardijo, mantan Ketua DPRD Jateng periode 1999-2004                                                                                                                                                                                                                                                                                              | Pengadilan Tinggi Jawa Tengah         | 2 tahun penjara                                        | 15 Mei 2006      |
| 118. | korupsi perubahan APBD 2003 senilai Rp 4.272.474.000, -                                                                                              | Bambang Mudiarto dan HM Yusuf Hidayat, masing-masing Ketua dan Wakil Ketua DPRD 1999-2004. H Darsono SE, H Mujahid SH, Drs Bandung Joko Suryono SH, Drs Rio Suseno, Ipmawan M Iqbal SP SAg, Eriadi Dodi Prasetya SE, H Sali Basuki, dan Purwono SH, semua anggota DPRD 1999-2004                                                                 | Mahkamah Agung                        | 2 orang (4 tahun penjara)<br>6 orang (3 tahun penjara) | 11 Agustus 2006  |
| 119. | korupsi dana APBD Kota Semarang tahun 2004 senilai Rp 2,16 miliar                                                                                    | Ismoyo Soebroto, HM Abdul Syukur Ghany, Humam Mukti Azis (ketiganya pimpinan DPRD Kota Semarang 1999-2004), Fathur Rahman, Santoso Hutomo, Agustina Wilujeng, Tohir Sandirdjo (keempatnya mantan anggota Komisi C), Shon Hadji Zaenuri, Hindarto Handoyo, Supriyadi, dan Ahmad Yusuf Sujiyanto (keempatnya mantan anggota panitia rumah tangga). | Pengadilan Tinggi Jawa Tengah         | 1 tahun penjara                                        | 1 Februari 2006  |
| 120. | korupsi dalam perkara letter of credits (L/C) BNI Rp 1,3 triliun                                                                                     | Jeffry Baso, bos PT Triranu Caraka Pacific (TCP)                                                                                                                                                                                                                                                                                                 | Pengadilan Negeri Jakarta Selatan     | 7 tahun penjara                                        | 31 Oktober 2006  |
| 121. | korupsi impor beras ilegal 60.000 ton dari Vietnam                                                                                                   | Wahjono, Yamiral Aziz Santoso, Sumantri, Athan Carina (semuanya pegawai Direktorat Jenderal Bea dan Cukai)                                                                                                                                                                                                                                       | Pengadilan Negeri Jakarta Utara       | 1 tahun penjara                                        | 11 Oktober 2006  |
| 122. | korupsi dalam aliran dana hasil pencairan letter of credit (L/C) fiktif BNI Cabang Kebayoran Baru                                                    | Dicky Iskandar Dinata, Direktur Utama PT Brocolin Internasiona                                                                                                                                                                                                                                                                                   | Pengadilan Tinggi DKI Jakarta         | 20 tahun penjara                                       | November 2006    |
| 123. | Korupsi penyaluran dana bantuan keagamaan senilai Rp 3,3 miliar                                                                                      | Wildanul Firdaus, staf ahli Bupati Tangerang                                                                                                                                                                                                                                                                                                     | Pengadilan Negeri Tangerang           | 1 tahun penjara                                        | 29 November 2006 |
| 124. | korupsi dana tunjangan kesejahteraan, terdiri dari uang kesehatan, sewa rumah, tunjangan hari raya, dan bantuan daging lebaran senilai Rp 1,4 miliar | 15 mantan anggota DPRD Kabupaten Kerinci, Jambi (Kaharuddin, arjohan, Imran Adamsyah, Mas'ud, Ismail, Nurhan, Husin Hamid, Hamka, Atmawadi Ilyas, Amran Jailani, Jamudin, Hudmi, Sutan Kari, Jafar Thalib, Ernawati dan M Junis)                                                                                                                 | Pengadilan Negeri Sungaipenuh Kerinci | 1 tahun penjara                                        | 21 November 2006 |
| 125. | Korupsi penyaluran dana beasiswa di Kota Semarang senilai Rp 1,2 miliar                                                                              | Yulius Basiwantoro dan Untung Sudjarno, keduanya kader Partai Demokrasi Indonesia Perjuangan (PDI-P) Kota Semarang                                                                                                                                                                                                                               | Pengadilan Negeri Semarang            | 1 tahun penjara                                        | 15 Agustus 2006  |

## C. STATISTIK PERKARA

### 1 Perkara dan Terdakwa

|                 |   |             |
|-----------------|---|-------------|
| Jumlah perkara  | : | 125 perkara |
| Jumlah terdakwa | : | 362 orang   |

### 2. Hukuman

| Vonis                    | Jumlah perkara       | Persentase (%) |
|--------------------------|----------------------|----------------|
| Vonis bebas              | 40<br>(117 terdakwa) | 32             |
| Vonis bersalah           |                      |                |
| • dibawah 2 tahun        | 37                   | 29,8           |
| • 2 tahun hingga 5 tahun | 32                   | 25,6           |
| • Diatas 5 tahun         | 16                   | 12,8           |
| Jumlah                   | 125                  | 100            |

### 3. Aktor

|                                                            |   |     |
|------------------------------------------------------------|---|-----|
| Eksekutif (kepala daerah, mantan kepala daerah, dinas dsb) | : | 55  |
| Legislatif (mantan, anggota DPR/D dan MPR)                 | : | 35  |
| Swasta (termasuk Bumh/BUMD)                                | : | 35  |
| Jumlah                                                     | : | 125 |

### 4. Tingkat Pengadilan

|                   |   |             |
|-------------------|---|-------------|
| Pengadilan Negeri | : | 100 perkara |
| Pengadilan Tinggi | : | 18 perkara  |
| Mahkamah Agung    | : | 7 perkara   |

### Sumber data

Diolah dari berbagai sumber media (Kompas, Media Indonesia, Jawa Pos, Republika, Seputar Indonesia, Suara Karya, Pikiran Rakyat, Suara Merdeka, Waspada, Surya, Bali Post, Kedaulatan Rakyat, Hukumonline, Tempointeraktif.com, Kapanlagi.com, PolitikIndonesia.com, Antara.News, Liputan6.com, Kominfo-Newsroom, Media Indonesia online, Riauinfo.com) selama periode 2006 dan Up date : 3 Januari 2007



## Lampiran 10

**Daftar Kasus Korupsi yang Telah Diperiksa dan Divonis Pengadilan Selama Tahun 2005**

| NO  | PERKARA                                                                                                              | TERDAKWA                                                                                                                                                                                                                                                                                                                                             | PENGADILAN                        | VONIS | WAKTU            |
|-----|----------------------------------------------------------------------------------------------------------------------|------------------------------------------------------------------------------------------------------------------------------------------------------------------------------------------------------------------------------------------------------------------------------------------------------------------------------------------------------|-----------------------------------|-------|------------------|
| 1.  | Korupsi APBD Kota Padang tahun 2001/2002 sebesar Rp 8,4 miliar                                                       | Mantan Wali Kota Padang, Zuiyen Rais                                                                                                                                                                                                                                                                                                                 | Pengadilan Negeri Padang          | Bebas | 8 Agustus 2005   |
| 2.  | korupsi APBD Singkawang Tahun 2003                                                                                   | 12 mantan anggota DPRD Singkawang: Soemardji (mantan Ketua DPRD Singkawang), Hermanus (wakil ketua), dan Adrianto Alio (wakil ketua). Sementara sebagai panitia anggaran, yakni Tambok Pardede (ketua), dengan anggota Hadi Surya, Tavip Putra Purba, Aminuddin Mahyan, H Zainal Abidin HZ, JM Papilaya, Irene Kadem, Ridha Wahyudi, dan Lis Sumiati | Pengadilan Negeri Singkawang      | Bebas | 31 Mei 2005      |
| 3.  | Korupsi anggaran pos DPRD Kota Manado dalam tahun 2003                                                               | Mantan Ketua DPRD Johannes E. Tampi dan dua Wakil Ketua DPRD Kota Manado, Jeremia amongilala dan Dja'far Alkatiri                                                                                                                                                                                                                                    | Pengadilan Negeri Manado          | Bebas | 30 Mei 2005      |
| 4.  | korupsi Anggaran Pendapatan dan Belanja Daerah (APBD) Provinsi Sumatera Selatan senilai Rp 7,5 miliar                | Abdul Shobur, mantan Sekretaris DPRD Sumatera Selatan                                                                                                                                                                                                                                                                                                | Pengadilan Negeri Palembang       | Bebas | 14 Februari 2005 |
| 5.  | Korupsi dana PT Jamsostek Tbk. (Jamsostek) senilai Rp 1,8 miliar                                                     | Ketua umum Partai Buruh Sosial Demokrasi (PBSO) Muchtar Pakpahan                                                                                                                                                                                                                                                                                     | Pengadilan Negeri Jakarta Selatan | Bebas | 15 Februari 2005 |
| 6.  | korupsi dana kegiatan DPRD Ketua DPRD periode 1999-2004                                                              | Wakil Walikota Bogor, Moch. Sahid                                                                                                                                                                                                                                                                                                                    | Pengadilan Negeri Bogor           | Bebas | 24 Januari 2005  |
| 7.  | korupsi APBD sebesar Rp 2,8 miliar oleh anggota DPRD Kabupaten Pontianak                                             | Moses Alep (Ketua DPRD Kabupaten Pontianak, periode 1999-2004), Efendi Cingkong (Wakil Ketua DPRD Kabupaten Pontianak, periode 1999-2004), H. Soetodjo (Wakil Ketua DPRD Kabupaten Pontianak, periode 1999-2004),                                                                                                                                    | Pengadilan Negeri Pontianak       | Bebas | 12 April 2005    |
| 8.  | korupsi APBD sebesar Rp 2,8 miliar oleh anggota DPRD Kabupaten Pontianak                                             | dua mantan anggota DPRD Kabupaten Pontianak periode 1999-2004, M Makmur Abdullah dan Adrean Felix                                                                                                                                                                                                                                                    | Pengadilan Negeri Pontianak       | Bebas | 21 April 2005    |
| 9.  | Korupsi Rp 2,9 miliar APBD yang melibatkan anggota DPRD Parigi Moutong                                               | Lima anggota DPRD Kabupaten Parigi Moutong, Sulawesi Tengah, periode 2003-2004, yaitu M Awalunyah Passau, Salam Kamu Tanjema, Nico Rantung, Andi Tjimbung Tagunu, dan Hafid Yahya                                                                                                                                                                    | Pengadilan Negeri Palu            | Bebas | 22 Juni 2005     |
| 10. | Korupsi penyimpangan penggunaan dana Bulog sebesar Rp 169 miliar hasil penjualan minyak goreng sebesar Rp 169 miliar | Nurdin Halid, Ketua Koperasi Distribusi Indonesia                                                                                                                                                                                                                                                                                                    | Pengadilan Negeri Jakarta Selatan | Bebas | 16 Juni 2005     |
| 11. | Korupsi penyelundupan 73                                                                                             | Kepala Divisi Perdagangan Umum                                                                                                                                                                                                                                                                                                                       | Pengadilan                        | Bebas | 5 Juli 2005      |

| NO  | PERKARA                                                                                          | TERDAKWA                                                                                                                         | PENGADILAN                         | VONIS | WAKTU            |
|-----|--------------------------------------------------------------------------------------------------|----------------------------------------------------------------------------------------------------------------------------------|------------------------------------|-------|------------------|
|     | ribu ton gula ilegal                                                                             | Inkud, Abdul Waris Halid                                                                                                         | Negeri Jakarta Utara               |       |                  |
| 12. | korupsi dalam penunjukan langsung 19 proyek Pemerintah Kota Bengkulu senilai Rp 7,6 miliar       | Wali Kota Bengkulu, Chalik Effendi                                                                                               | Pengadilan Negeri Bengkulu         | Bebas | 14 Juli 2005     |
| 13. | Korupsi penyelundupan 56 ribu ton gula ilegal                                                    | Nurdin Halid, Ketua Koperasi Distribusi Indonesia                                                                                | Pengadilan Negeri Jakarta Utara    | Bebas | 15 Desember 2005 |
| 14. | Korupsi Rp46,6 Miliar di DPRD Kutat Timur                                                        | mantan ketua DPRD Kutim. Abdal Nanang dan Sekwan Darli Yusuf                                                                     | Pengadilan Negeri Sangata          | Bebas | 16 Desember 2005 |
| 15. | Korupsi PT Perhutani sebesar Rp1,9 miliar                                                        | Direktur PT Avicom Promo Media Deden Akbar Karsawijaya                                                                           | Pengadilan Negeri Jakarta Pusat    | Bebas | April 2005       |
| 16. | Korupsi Suap untuk pelolosan LPJ Bupati Mandailing Natal tahun 2001                              | Ir Raja Sahlan Nasution dan Drs HM Suandi Hasibuan.                                                                              | Pengadilan Negeri Padang Sidempuan | Bebas | 28 Maret 2005    |
| 17. | korupsi dana pemilu Rp 199,5 juta                                                                | Ketua KPU Lumajang Misbahul Munir Anshari                                                                                        | Pengadilan Negeri Lumajang         | Bebas | 30 Juni 2005     |
| 18. | Korupsi APBD Konawe 2004 senilai Rp 2 milyar                                                     | Bupati Kabupaten Konawe, Sulawesi Tenggara, Lukman Abunawas                                                                      | Pengadilan Negeri Kendari          | Bebas | 23 Juni 2005     |
| 19. | Korupsi penggelembungan dana pengadaan alat berat eskavator dan trailer sebesar Rp 539 juta      | Budiono, Kesubdin Operasional dan Pemeliharaan DPU dan Pengairan Kabupaten Jember                                                | Pengadilan Negeri Jember           | Bebas | 24 Agustus 2005  |
| 20. | korupsi dana APBD Kota Tanjungpinang tahun 2003                                                  | Drs Asep Nana Suryana . Ketua Fraksi Perkasa DPRD Kota Tanjungpinang                                                             | Pengadilan Negeri Tanjung Pinang   | Bebas | 19 Desember 2005 |
| 21. | Korupsi Pengadaan Kapal Natuna Bahari I senilai Rp1,9 miliar                                     | Kepala Dinas Pariwisata Natuna, Yusrizal.                                                                                        | Pengadilan Negeri Tanjung Pinang   | Bebas | 2005             |
| 22. | Korupsi Suap untuk pelolosan LPJ Bupati Mandailing Natal tahun 2001                              | Amru Helmi Daulay, Bupati Tk II Kab. Madina Sumatera Utara                                                                       | Pengadilan Negeri Padang Sidempuan | Bebas | 14 Januari 2005  |
| 23. | Korupsi Suap untuk pelolosan LPJ Bupati Mandailing Natal tahun 2001                              | Amru Helmi Daulay, Bupati Tk II Kab. Madina Sumatera Utara                                                                       | MA                                 | Bebas | 14 Juni 2005     |
| 24. | korupsi Yayasan Dakab senilai Rp 2 miliar                                                        | Amelia Yani, Glinding dan Ir Sayuti Rustam                                                                                       | Pengadilan Negeri Sleman           | Bebas | 27 Agustus 2005  |
| 25. | korupsi di kantor Dinas Perindustrian dan Perdagangan (Disperindag) Cirebon                      | Pejabat staf ahli Bupati Cirebon, Nunung Sumarsana                                                                               | Pengadilan Negeri Cirebon          | Bebas | 3 Mei 2005       |
| 26. | korupsi gaji ganda Rp70 juta                                                                     | Drs H. Maman Setiawan, anggota DPRD Kota Bandung dari Fraksi Partai Amanat Nasional                                              | Pengadilan Negeri Bandung          | Bebas | 12 Mei 2005      |
| 27. | Korupsi penerbitan LC fiktif BNI senilai Rp 852 juta                                             | Honorius                                                                                                                         | Pengadilan Negeri Pontianak        | Bebas | 20 Juli 2005     |
| 28. | Korupsi Dana proyek OPT yang dilaksanakan pada 1995-2001, dengan nilai proyek Rp 111.808.200.000 | Azam Azman Natawijana, kepala proyek Optimalisasi Pabrik Terak (OPT) II, PT Semen Baturaja (SB) yang kini menjadi anggota DPR-RI | Pengadilan Negeri Palembang        | Bebas | 2005             |

| NO  | PERKARA                                                                                                                           | TERDAKWA                                                                                                                        | PENGADILAN                  | VONIS                                                                                                                                        | WAKTU            |
|-----|-----------------------------------------------------------------------------------------------------------------------------------|---------------------------------------------------------------------------------------------------------------------------------|-----------------------------|----------------------------------------------------------------------------------------------------------------------------------------------|------------------|
|     |                                                                                                                                   | dari Partai Demokrat untuk daerah pemilihan Jawa Timur.                                                                         |                             |                                                                                                                                              |                  |
| 29. | Korupsi dana pembebasan lahan taman pemakaman umum (TPU) di Kecamatan Gandus, Palembang dengan nilai kerugian negara Rp 415 juta. | Yusuf Sumo, mantan anggota DPRD Palembang dari PDI Perjuangan dan Guruh Agung Putra Jaya, sekretaris Kecamatan Gandus.          | Pengadilan Negeri Palembang | Bebas                                                                                                                                        | 2005             |
| 30. | korupsi pembuatan peta di Badan Pertanahan Nasional (BPN) Provinsi Sumsel yang merugikan negara Rp 1,5 miliar.                    | Bahransyah, terdakwa Terhadap kepala Bidang Penatagunaan Tanah BPN Sumsel                                                       | Pengadilan Negeri Palembang | Bebas                                                                                                                                        | 2005             |
| 31. | korupsi dana perjalanan dinas fiktif ke Malaysia senilai Rp 25 juta                                                               | M Natsir Djakfar, mantan wakil ketua DPRD Sumsel                                                                                | Pengadilan Negeri Palembang | Bebas                                                                                                                                        | 2005             |
| 32. | Korupsi dana BLBI BUN dan merugikan negara sebesar Rp 6,738 triliun                                                               | Leonard Tanubrata mantan Presiden Direktur Bank Umum Nasional (BUN) dan Kaharuddin Ongko mantan Wakil Presiden Komisaris PT BUN | MA                          | Bebas                                                                                                                                        | 17 Maret 2005    |
| 33. | korupsi APBD Sumbar 2002 sebesar Rp 5,9 miliar.                                                                                   | 43 mantan pimpinan dan anggota DPRD Sumatra Barat periode 1999-2004                                                             | MA                          | 3 mantan pimpinan DPRD Sumatera Barat masing-masing 5 tahun penjara. Sedangkan 40 mantan anggota DPRD Sumatera Barat divonis 4 tahun penjara | 3 Agustus 2005   |
| 34. | korupsi dana reboisasi Hutan Tanaman Industri (HTI) senilai Rp100,931 miliar                                                      | Probosutedjo                                                                                                                    | MA                          | 4 tahun penjara                                                                                                                              | 28 November 2005 |
| 35. | Korupsi penyelewengan kredit dari Bank Mandiri dengan kerugian negara sebesar Rp 35,9 miliar                                      | Nader Taher                                                                                                                     | Pengadilan Negeri Pekanbaru | 14 tahun penjara                                                                                                                             | 21 Desember 2005 |
| 36. | korupsi di RSUP Adam Malik sejak bulan Januari 2002-Oktober 2002 sebesar Rp 1.8 miliar                                            | mantan Ketua Tim Praktik Pelayanan Esensial Rumah Sakit Umum Pusat Adam Malik, Medan, dr Daniel Ginting                         | Pengadilan Negeri Medan     | 2 tahun penjara                                                                                                                              | 1 Agustus 2005   |
| 37. | korupsi pajak bumi dan bangunan (PBB) sekitar Rp 50 juta                                                                          | Sarjono, Kepala Desa Dokoro Kecamatan Wirosari                                                                                  | Pengadilan Negeri Purwodadi | 1 tahun penjara                                                                                                                              | 12 Januari 2005  |
| 38. | korupsi dana APBD Banggai 2004, senilai ratusan juta rupiah                                                                       | H Burhanuddin Dg Matorang, Onesmus Djaka, dan H Frans Delangen (mantan anggota dewan), Moh Rifai Dg Matorang, dan Nasrun        | Pengadilan Negeri Luwuk     | Burhanuddin Dg Matorang dan Frans                                                                                                            | 13 Januari 2005  |

| NO  | PERKARA                                                                                               | TERDAKWA                                                                                                                                                                                                                       | PENGADILAN                       | VONIS                                                                                                                         | WAKTU            |
|-----|-------------------------------------------------------------------------------------------------------|--------------------------------------------------------------------------------------------------------------------------------------------------------------------------------------------------------------------------------|----------------------------------|-------------------------------------------------------------------------------------------------------------------------------|------------------|
|     |                                                                                                       | Hipan SH (masih aktif sebagai anggota Dewan Banggai)                                                                                                                                                                           |                                  | Delangen (2,3 tahun), Nasrun Hpan dan Onesmus Djaka (2,6 tahun), sedangkan Moh Rifai Dg Matorang sendiri persis kena 2 tahun. |                  |
| 39. | korupsi Anggaran Pendapatan dan Belanja Daerah (APBD) Provinsi Sumatera Selatan senilai Rp 7,5 miliar | Adjis Saip, mantan Ketua DPRD Sumsel                                                                                                                                                                                           | Pengadilan Negeri Palembang      | 2 tahun penjara                                                                                                               | 14 Februari 2005 |
| 40. | Korupsi beras impor ilegal                                                                            | Nurdin Halid , Achmad Soebadio Lamo, Khairuddin Nur                                                                                                                                                                            | Pengadilan Negeri Jakarta Utara  | Nurdin Halid dan Soebadio (2,5 tahun penjara) Khairuddin Nur (1,5 tahun)                                                      | 10 Agustus 2005  |
| 41. | Korupsi APBD Kota Bandar Lampung tahun 2002 sebesar Rp 3,7 miliar                                     | Tiga mantan anggota Dewan Perwakilan Rakyat Daerah Kota Bandar Lampung periode 1999-2004, yaitu Palgunadi, Gusti Rachmat Kartolo, dan Muchzan Zain, masing-masing divonis 18 bulan penjara.                                    | Pengadilan Negeri Tanjung Karang | masing-masing 18 bulan penjara                                                                                                | 8 Maret 2005     |
| 42. | korupsi dana APBD Kabupaten Ciamis tahun 2001/2002 sebesar Rp 5,2 miliar,                             | Wakil Bupati (Wabup) Ciamis, Dede Sobandi, Dede Heru serta Wakil Sekretaris Panitia Anggaran, Nasuha Riza Garniwa                                                                                                              | Pengadilan Negeri Ciamis         | 2,5 tahun penjara                                                                                                             | 31 Mei 2005      |
| 43. | korupsi dana APBD tahun anggaran 2001 dan 2002 sekitar Rp 5,3 miliar                                  | 10 mantan Panitia Anggaran DPRD Kabupaten Ciamis (Basuki Suparno, Adang Badrul Zaman, Edi Susanto, Mochamad Taufik, Nandang Hidayat, Moch. Ismail Ilyas, Purnama Rizal, Mamat Rahmat, H R. Abdul Gofar, dan Toyo Wijayakusuma) | Pengadilan Negeri Ciamis         | Masing-masing 2 tahun penjara                                                                                                 | 31 Agustus 2005  |
| 44. | korupsi dana pengadaan seragam Perlindungan Masyarakat (Linmas) pada Pemilu 2004 sebesar Rp 310 juta  | R. Suhud Achyadi, mantan Kepala Kantor Kesatuan Bangsa (Kesbang) Kota Bogor                                                                                                                                                    | Pengadilan Negeri Bogor          | 2 tahun penjara                                                                                                               | 20 Juni 2005     |
| 45. | korupsi dana APBD 2003 senilai Rp 4,2 miliar                                                          | Sepuluh mantan anggota DPRD Solo periode 1999-2004.                                                                                                                                                                            | Pengadilan Negeri Solo           | Dua mantan pimpinan DPRD, (5 tahun penjara), Sedang delapan lainnya (2,6                                                      | 22 Agustus 2005  |

| NO  | PERKARA                                                                                                                     | TERDAKWA                                                                                                                                                                                   | PENGADILAN                      | VONIS                                                                                                                 | WAKTU             |
|-----|-----------------------------------------------------------------------------------------------------------------------------|--------------------------------------------------------------------------------------------------------------------------------------------------------------------------------------------|---------------------------------|-----------------------------------------------------------------------------------------------------------------------|-------------------|
|     |                                                                                                                             |                                                                                                                                                                                            |                                 | tahun penjara)                                                                                                        |                   |
| 46. | Korupsi dana APBD Banten tahun anggaran 2003 sebesar Rp14 miliar                                                            | Mantan Ketua DPRD Banten Dharmono K Lawi, bersama dua wakilnya; Muslim Djamaludin dan Mufrodi Muchsin.                                                                                     | Pengadilan Negeri Serang        | masing-masing 4 tahun enam bulan penjara.                                                                             | 16 Juni 2005      |
| 47. | Korupsi dana APBD sebesar Rp10,4 miliar                                                                                     | 27 anggota DPRD Padang periode 1999-2004                                                                                                                                                   | Pengadilan Negeri Padang        | 4 tahun penjara                                                                                                       | 14 Juni 2005      |
| 48. | korupsi dana Anggaran Pendapatan dan Belanja Daerah Provinsi Banten tahun 2003.                                             | Mantan Sekretaris Panitia Anggaran Dewan Perwakilan Rakyat Daerah Provinsi Banten Tuti Sutiah Indra.                                                                                       | Pengadilan Negeri Serang        | 1,5 tahun penjara                                                                                                     | 7 Juli 2005       |
| 49. | Dugaan penyimpangan dana anggaran satuan kerja (DASK) tahun 2003 sebesar Rp1,4 miliar,                                      | Kasudin Pertamanan Pemkot Jakbar Sri Budi Setiati dan mantan Kasudin Pertamanan Jakbar Harun Al Rasyid                                                                                     | Pengadilan Negeri Jakarta Barat | Masing-masing 4 tahun penjara                                                                                         | 4 Agustus 2005    |
| 50. | Dugaan korupsi penggelembungan dana (Mark Up) APBD Kabupaten Donggala dengan nilai kerugian negara sedikitnya Rp 5,2 miliar | Ketua dan enam anggota DPRD Kabupaten Donggala; yaitu Ridwan Yalidjama, Anwar Muthaheer, Ventje Sumakul, Awaluddin Husen Arif, Sutomo Burma (Ketua DPRD Donggala 1999-2004), Ketut Mardika | Pengadilan Negeri Palu          | 1 tahun penjara.                                                                                                      | 10 Oktober 2005   |
| 51. | korupsi dana rutin tahun anggaran 2003 dan 2004 dengan kerugian negara sekitar Rp 5,9 miliar                                | 20 anggota DPRD Kota Kendari, Sulawesi Tenggara, periode 1999-2004. seluruh terdakwa dalam perkara korupsi tersebut berjumlah 26 orang. Namun, dua di antaranya meninggal                  | Pengadilan Negeri Kendari       | 17 orang divonis 1,6 tahun penjara, 3 orang 1 tahun penjara. Dua pimpinan DPRD Kota Kendari divonis 1,6 tahun penjara | 11 Oktober 2005   |
| 52. | kasus korupsi dana tak tersangka Anggaran Pendapatan dan Belanja Daerah 2003 senilai Rp 14 miliar                           | Mantan Sekretaris DPRD Provinsi Banten periode 2002-2004 Tardian                                                                                                                           | Pengadilan Negeri Serang        | 1 tahun penjara                                                                                                       | 26 Oktober 2005   |
| 53. | kasus korupsi dana APBD tahun 2002-2004 sebesar Rp 97 miliar                                                                | Bupati Blitar Imam Muhadi, yang telah nonaktif                                                                                                                                             | Pengadilan Negeri Blitar        | 15 tahun penjara                                                                                                      | 31 Oktober 2005   |
| 54. | korupsi dana APBD senilai Rp 14,8 miliar                                                                                    | Sebanyak 11 mantan anggota DPRD Kota Semarang periode 1999 - 2004                                                                                                                          | Pengadilan Negeri Semarang      | 1 tahun penjara dengan dua tahun masa percobaan                                                                       | 15 September 2005 |
| 55. | korupsi dana APBD senilai Rp 14,8 miliar                                                                                    | Mardijo, Ketua DPRD Jateng 1999-2004                                                                                                                                                       | Pengadilan Negeri Semarang      | 1 tahun penjara dengan dua tahun masa percobaan                                                                       | 23 Desember 2005  |
| 56. | korupsi dana APBD senilai Rp 14,8 miliar                                                                                    | mantan pimpinan Panitia Rumah Tangga (PRT) DPRD Jateng 1999-                                                                                                                               | Pengadilan Negeri Semarang      | 10 bulan penjara                                                                                                      | 23 Desember       |

| NO  | PERKARA                                                                     | TERDAKWA                                                                                                                                                                                                                                                                                                                                                                                                           | PENGADILAN                                    | VONIS                                                             | WAKTU            |
|-----|-----------------------------------------------------------------------------|--------------------------------------------------------------------------------------------------------------------------------------------------------------------------------------------------------------------------------------------------------------------------------------------------------------------------------------------------------------------------------------------------------------------|-----------------------------------------------|-------------------------------------------------------------------|------------------|
|     |                                                                             | 2004, Asrofie, Soejatno dan Wahono Ilyas                                                                                                                                                                                                                                                                                                                                                                           |                                               | dengan masa percobaan 20 bulan                                    | 2005             |
| 57. | korupsi dana APBD Blitar 2004 Rp 97 miliar                                  | Kepala Bagian Keuangan Pemerintah Kabupaten Blitar Krisanto dan Kepala Subbagian Pembukuan Bangun Suharsono                                                                                                                                                                                                                                                                                                        | Pengadilan Negeri Blitar                      | Krisanto (13 tahun penjara)<br>Bangun Suharsono (5 tahun penjara) | 7 September 2005 |
| 58. | Korupsi APBD Donggala 2001-2004 hingga negara dirugikan Rp 5,2 miliar.      | Wakil ketua DPRD Donggala Burhan Lamangkona dan Andi Malik Mappiasse                                                                                                                                                                                                                                                                                                                                               | Pengadilan Negeri Palu                        | 1 tahun penjara                                                   | 17 November 2005 |
| 59. | Korupsi dana Anggaran Pendapatan dan Belanja Daerah 2002 DPRD Tabalong.     | Wakil Bupati Tabalong, Kalimantan Selatan, Murhan Effendie bin Ahmad Hasyim Tamin, yang juga mantan Ketua DPRD Tabalong 1999-2004, serta mantan Wakil Ketua DPRD Tabalong, Taufiq Amin dan Soegionor                                                                                                                                                                                                               | Pengadilan Negeri Tanjung, Kalimantan Selatan | 1 tahun penjara                                                   | 28 November 2005 |
| 60. | korupsi Rp 5,3 miliar dana APBD di DPRD Nganjuk tahun anggaran 2001-2003    | Ketua DPRD Kabupaten Nganjuk periode 1999-2004, Marmun                                                                                                                                                                                                                                                                                                                                                             | Pengadilan Negeri Nganjuk                     | 2 Tahun penjara                                                   | 29 November 2005 |
| 61. | Kasus korupsi APBD di DPRD Banyumas                                         | 11 mantan anggota DPRD Banyumas, Jawa Tengah, periode 1999-2004 yaitu: Untung Sarwono Hadi, Sri Supangat, Sunarto Arief, Moethia Hardjatmo, Sarjono, Wiyono, Mussadad Bikry Nur, Muke M. Saleh, Hussen al-Kaff, Guno Purtopo, dan Haris Subyakto. Pada sidang-sidang sebelumnya, jumlah terdakwa 12 orang. Namun, seorang antaranya, Supadi Tjitra Wijaya, 69 tahun, meninggal akibat serangan jantung di tahanan. | Pengadilan Negeri Purwokerto                  | 1 tahun penjara                                                   | 28 November 2005 |
| 62. | korupsi dana APBD 2003 sebesar Rp14 miliar                                  | Gubernur Banten non aktif, Djoko Munandar                                                                                                                                                                                                                                                                                                                                                                          | Pengadilan Negeri Serang, Banten              | 2 tahun penjara                                                   | 21 Desember 2005 |
| 63. | korupsi pengadaan proyek fiktif alat-alat pemadam kebakaran Rp 184,3 juta   | Mantan Kepala Suku Dinas Pemadam Kebakaran Jakarta Barat Fuad Said dan kepala seksi sarana operasional suku dinas itu, Mingan Suyono                                                                                                                                                                                                                                                                               | Pengadilan Negeri Jakarta Barat               | Fuad (3 tahun),<br>Mingan (2,5 tahun)                             | 8 Desember 2005  |
| 64. | Kasus dugaan korupsi pembelian kapal nelayan sebesar Rp 705 juta            | Mantan bupati Gunung Kidul, Yoetikno                                                                                                                                                                                                                                                                                                                                                                               | Pengadilan negeri Wonosari                    | 2 tahun 8 bulan penjara                                           | 12 Desember 2005 |
| 65. | Korupsi dana APBD Kabupaten Banyumas 2002 dan 2003 senilai Rp 1,917 miliar. | Tri Waluyo Basuki (TWB), mantan Ketua DPRD Kabupaten Banyumas Tengah periode 1999-2004                                                                                                                                                                                                                                                                                                                             | Pengadilan Negeri Purwokerto                  | 1 tahun 4 bulan penjara                                           | 12 Desember 2005 |
| 66. | korupsi APBD 2002-2004 Kabupaten Madiun senilai Rp 8,495 miliar             | Ketua DPRD Kabupaten Madiun periode 1999-2004 Lilik Indarto Gunawan                                                                                                                                                                                                                                                                                                                                                | Pengadilan Negeri Madiun                      | 4 tahun penjara                                                   | 21 Desember 2005 |
| 67. | Penyelewengan dana pemotretan udara dan pemetaan hutan sebesar              | Ketua Umum Asosiasi Pengusaha Hutan Indonesia Adiwarsita Adinegoro                                                                                                                                                                                                                                                                                                                                                 | Pengadilan Negeri Jakarta Pusat               | 6 tahun penjara                                                   | 12 Oktober 2005  |

| NO  | PERKARA                                                                       | TERDAKWA                                                                                                                                                                                                                                                                     | PENGADILAN                        | VONIS                      | WAKTU            |
|-----|-------------------------------------------------------------------------------|------------------------------------------------------------------------------------------------------------------------------------------------------------------------------------------------------------------------------------------------------------------------------|-----------------------------------|----------------------------|------------------|
|     | Rp 18,4 miliar                                                                |                                                                                                                                                                                                                                                                              |                                   |                            |                  |
| 68. | Penyelewengan dana pemotretan udara dan pemetaan hutan sebesar 18,486 miliar. | Mantan Bendahara Asosiasi Pengusaha Hutan Indonesia (APHI) Yusran Syarieff, mantan Wakil Ketua APHI Zain Mansyur, dan mantan Wakil Bendahara HA Fattah                                                                                                                       | Pengadilan Negeri Jakarta Pusat   | 4 empat tahun              | 12 November 2005 |
| 69. | Korupsi dana kaveling yang merugikan keuangan negara Rp 24,9 miliar.          | Koerdi Mukri mantan Wakil Ketua DPRD Jawa Barat periode 1999-2004                                                                                                                                                                                                            | Pengadilan Negeri Bandung         | 4 tahun penjara.           | 26 Agustus 2005  |
| 70. | Kasus korupsi dana kegiatan pemilu 2004 sebesar Rp 520 juta                   | Bupati Temanggung, Toto Ary Prabowo                                                                                                                                                                                                                                          | Pengadilan Negeri Temanggung      | 4 tahun penjara            | 27 Oktober 2005  |
| 71. | Korupsi pembobolan BNI 46 Kebayoran Baru senilai Rp1,214 T                    | Adrian Herling Waworuntu                                                                                                                                                                                                                                                     | Pengadilan Negeri Jakarta Selatan | Seumur hidup               | 31 Maret 2005    |
| 72. | Korupsi pembobolan BNI 46 Kebayoran Baru senilai Rp1,214 T                    | Adrian Herling Waworuntu                                                                                                                                                                                                                                                     | Kasasi                            | Seumur Hidup               | September 2005   |
| 73. | Korupsi dana APBD tahun 2001 sebesar sekitar Rp 1 miliar                      | Tiga mantan pimpinan DPRD Cirebon adalah H Suryana (sekarang anggota DPR RI), H Sunaryo HW (sekarang ketua DPRD Kota Cirebon) dan H Haries Sutamin.                                                                                                                          | Kasasi                            | 1 tahun                    | Oktober 2005     |
| 74. | Korupsi dana APBD tahun 2001 sebesar sekitar Rp 1 miliar                      | Tujuh mantan anggota DPRD Kota Cirebon periode 1999-2004. Ketujuh mantan anggota DPRD itu adalah Jarot Adi Sutarto (PDI-P), Enang Iman Gana (PKPI), Setiawan (PAN), Agus Sompi (Partai Golkar), Suyatno AH Saman (PKB), M Safari Wartoyo (PPP), serta Achmad Djuenedi (PBB). | Kasasi                            | 1 tahun                    | Oktober 2005     |
| 75. | Korupsi Bank Dagang Bali senilai Rp 1,2 triliun                               | Oka Budiana                                                                                                                                                                                                                                                                  | Pengadilan Negeri Jakarta Selatan | 4 tahun penjara            | 7 Desember 2005  |
| 76. | Korupsi premi asuransi anggota Dewan senilai Rp 3,2 miliar                    | mantan Wali Kota Banjarmasin Midfai Yabani                                                                                                                                                                                                                                   | Pengadilan Negeri Banjarmasin     | 2 tahun penjara            | 29 Desember 2005 |
| 77. | Korupsi BLBI Bank Aspac Rp 583 miliar                                         | Hendrawan Haryono                                                                                                                                                                                                                                                            | Peninjauan Kembali MA             | 1 tahun penjara            | Mei 2005         |
| 78. | Korupsi penyaluran dana BLBI senilai Rp 2 Triliun                             | Paul Sutopo, Heru Suprptomo dan Hendro Budiyanto                                                                                                                                                                                                                             | Kasasi                            | 1 tahun enam bulan penjara | Mei 2005         |

Sumber : Diolah dari berbagai sumber media (Kompas, Media Indonesia, Jawa Pos, Republika, Seputar Indonesia, Suara Karya, Pikiran Rakyat, Suara Merdeka, Waspada, Surya, Bali Post, Kedaulatan Rakyat, Hukumonline, Tempointeraktif.com, Kapanlagi.com, PolitikIndonesia.com, Antara.News, Liputan6.com, Kominfo-Newsroom, Media Indonesia online, Riauinfo.com) selama periode 2006 dan Up date : 3 Januari 2007

## C. STATISTIK KASUS

### 1. Kasus dan Terdakwa

Jumlah kasus : 78 kasus  
Jumlah terdakwa : 253 orang

## 2. Hukuman

Vonis bebas : **32 (dengan 54 terdakwa)**

|                               |           |
|-------------------------------|-----------|
| Vonis bersalah :              |           |
| Divonis dibawah 2 tahun       | 27        |
| Diatas 2 tahun hingga 5 tahun | 13        |
| Diatas 5 tahun                | 6         |
| Jumlah                        | <b>46</b> |

## 3. Aktor

Eksekutif (kepala daerah, mantan kepala daerah, dinas dsb) : **21**

Legislatif (mantan, anggota DPR/D dan MPR) : **40**

Swasta (Bumn/BUMD) : **17**

---

**Jumlah : 78**



Lampiran 11

**List of Supreme Court Justices Appealing for Judicial Review on the Law on Judiciary Commission**

- I. Nama : **PROF. DR. PAULUS EFFENDI LOTULUNG, SH.**  
Jabatan : Hakim Agung pada Mahkamah Agung R.I.  
Alamat : Jl. Medan Merdeka Utara Kav.9-13  
Jakarta Pusat.
- II. Nama : **DRS.H. ANDI SYAMSU ALAM, SH.MH.**  
Jabatan : Hakim Agung pada Mahkamah Agung R.I.  
Alamat : Jl. Medan Merdeka Utara Kav.9-13  
Jakarta Pusat.
- III. Nama : **DRS.H. AHMAD KAMIL, SH.M.HUM.**  
Jabatan : Hakim Agung pada Mahkamah Agung R.I.  
Alamat : Jl. Medan Merdeka Utara Kav.9-13  
Jakarta Pusat.
- IV. Nama : **H. ABDUL KADIR MAPPONG, SH.**  
Jabatan : Hakim Agung pada Mahkamah Agung R.I.  
Alamat : Jl. Medan Merdeka Utara Kav.9-13  
Jakarta Pusat.
- V. Nama : **ISKANDAR KAMIL, SH.**  
Jabatan : Hakim Agung pada Mahkamah Agung R.I.  
Alamat : Jl. Medan Merdeka Utara Kav.9-13  
Jakarta Pusat.
- VI. Nama : **HARIFIN A. TUMPA, SH.MH.**  
Jabatan : Hakim Agung pada Mahkamah Agung R.I.  
Alamat : Jl. Medan Merdeka Utara Kav.9-13  
Jakarta Pusat.
- VII. Nama : **PROF.DR. H. MUCHSIN, SH.**  
Jabatan : Hakim Agung pada Mahkamah Agung R.I.  
Alamat : Jl. Medan Merdeka Utara Kav.9-13  
Jakarta Pusat.
- VIII. Nama : **PROF.DR. VALERINE J.L.K., SH.MA.**  
Jabatan : Hakim Agung pada Mahkamah Agung R.I.  
Alamat : Jl. Medan Merdeka Utara Kav.9-13  
Jakarta Pusat.
- IX. Nama : **H. DIRWOTO, SH.**  
Jabatan : Hakim Agung pada Mahkamah Agung R.I.

- Alamat : Jl. Medan Merdeka Utara Kav.9-13  
Jakarta Pusat.
- X. Nama : **DR.H. ABDURRAHMAN, SH.MH.**  
Jabatan : Hakim Agung pada Mahkamah Agung R.I.  
Alamat : Jl. Medan Merdeka Utara Kav.9-13  
Jakarta Pusat.
- XI. Nama : **PROF.DR. H. KAIMUDDIN SALLE, SH.MH.**  
Jabatan : Hakim Agung pada Mahkamah Agung R.I.  
Alamat : Jl. Medan Merdeka Utara Kav.9-13  
Jakarta Pusat.
- XII. Nama : **MANSUR KARTAYASA, SH.MH.**  
Jabatan : Hakim Agung pada Mahkamah Agung R.I.  
Alamat : Jl. Medan Merdeka Utara Kav.9-13  
Jakarta Pusat.
- XIII. Nama : **PROF. REHNGENA PURBA, SH.MS.**  
Jabatan : Hakim Agung pada Mahkamah Agung R.I.  
Alamat : Jl. Medan Merdeka Utara Kav.9-13  
Jakarta Pusat.
- XIV. Nama : **PROF.DR. H.M. HAKIM NYAK PHA, SH.DEA.**  
Jabatan : Hakim Agung pada Mahkamah Agung R.I.  
Alamat : Jl. Medan Merdeka Utara Kav.9-13  
Jakarta Pusat.
- XV. Nama : **DRS.H. HAMDAN, SH.MH.**  
Jabatan : Hakim Agung pada Mahkamah Agung R.I.  
Alamat : Jl. Medan Merdeka Utara Kav.9-13  
Jakarta Pusat.
- XVI. Nama : **H.M. IMRON ANWARI, SH.SpN.MH.**  
Jabatan : Hakim Agung pada Mahkamah Agung R.I.  
Alamat : Jl. Medan Merdeka Utara Kav.9-13  
Jakarta Pusat.
- XVII. Nama : **TITI NURMALA SIAHAAN SIAGIAN, SH.MH.**  
Jabatan : Hakim Agung pada Mahkamah Agung R.I.  
Alamat : Jl. Medan Merdeka Utara Kav.9-13  
Jakarta Pusat.
- XVIII. Nama : **WIDAYATNO SASTRO HARDJONO, SH.MSc.**  
Jabatan : Hakim Agung pada Mahkamah Agung R.I.  
Alamat : Jl. Medan Merdeka Utara Kav.9-13  
Jakarta Pusat.

- XIX. Nama : **MOEGIHARDJO, SH.**  
Jabatan : Hakim Agung pada Mahkamah Agung R.I.  
Alamat : Jl. Medan Merdeka Utara Kav.9-13  
Jakarta Pusat.
- XX. Nama : **H. MUHAMMAD TAUFIQ, SH.**  
Jabatan : Hakim Agung pada Mahkamah Agung R.I.  
Alamat : Jl. Medan Merdeka Utara Kav.9-13  
Jakarta Pusat.
- XXI. Nama : **H.R. IMAM HARJADI, SH.**  
Jabatan : Hakim Agung pada Mahkamah Agung R.I.  
Alamat : Jl. Medan Merdeka Utara Kav.9-13  
Jakarta Pusat.
- XXII. Nama : **ABBAS SAID, SH.**  
Jabatan : Hakim Agung pada Mahkamah Agung R.I.  
Alamat : Jl. Medan Merdeka Utara Kav.9-13  
Jakarta Pusat.
- XXIII. Nama : **ANDAR PURBA, SH.**  
Jabatan : Hakim Agung pada Mahkamah Agung R.I.  
Alamat : Jl. Medan Merdeka Utara Kav.9-13  
Jakarta Pusat.
- XXIV. Nama : **DJOKO SARWOKO, SH.MH.**  
Jabatan : Hakim Agung pada Mahkamah Agung R.I.  
Alamat : Jl. Medan Merdeka Utara Kav.9-13  
Jakarta Pusat.
- XXV. Nama : **I MADE TARA, SH.**  
Jabatan : Hakim Agung pada Mahkamah Agung R.I.  
Alamat : Jl. Medan Merdeka Utara Kav.9-13  
Jakarta Pusat.
- XXVI. Nama : **ATJA SONDJAJA, SH.**  
Jabatan : Hakim Agung pada Mahkamah Agung R.I.  
Alamat : Jl. Medan Merdeka Utara Kav.9-13  
Jakarta Pusat.
- XXVII. Nama : **H. IMAM SOEBECHI, SH.MH.**  
Jabatan : Hakim Agung pada Mahkamah Agung R.I.  
Alamat : Jl. Medan Merdeka Utara Kav.9-13  
Jakarta Pusat.
- XXVIII. Nama : **MARINA SIDABUTAR, SH.**

Jabatan : Hakim Agung pada Mahkamah Agung R.I.  
Alamat : Jl. Medan Merdeka Utara Kav.9-13  
Jakarta Pusat.

XXIX. Nama : **H. USMAN KARIM, SH.**  
Jabatan : Hakim Agung pada Mahkamah Agung R.I.  
Alamat : Jl. Medan Merdeka Utara Kav.9-13  
Jakarta Pusat.

XXX. Nama : **DRS. H. HABIBURRAHMAN, M.HUM.**  
Jabatan : Hakim Agung pada Mahkamah Agung R.I.  
Alamat : Jl. Medan Merdeka Utara Kav.9-13  
Jakarta Pusat.

XXXI. Nama : **M. BAHAUDIN QUADRY, SH.**  
Jabatan : Hakim Agung pada Mahkamah Agung R.I.  
Alamat : Jl. Medan Merdeka Utara Kav.9-13  
Jakarta Pusat.

Sumber: Mahkamah Konstitusi Republik Indonesia (MK-RI)

Lampiran 12 >>

DAFTAR HAKIM DAN KASUS KORUPSI YANG MEMVONIS BEBAS/LEPAS (1999-2005)

| NO | NAMA HAKIM                                          | PERKARA                                                        | TERDAKWA                                                                                                                                                                                                                                                                                                                                                         | TUNTUTAN JPU    | TINGKAT PENGADILAN           | TANGGAL VONIS  |
|----|-----------------------------------------------------|----------------------------------------------------------------|------------------------------------------------------------------------------------------------------------------------------------------------------------------------------------------------------------------------------------------------------------------------------------------------------------------------------------------------------------------|-----------------|------------------------------|----------------|
| 1. | Suparno                                             | Korupsi APBD Kota Padang tahun 2001/2002 sebesar Rp 8,4 miliar | Mantan Wali Kota Padang, Zuiyen Rais                                                                                                                                                                                                                                                                                                                             | 7 tahun penjara | Pengadilan Negeri Padang     | 8 Agustus 2005 |
| 2. | Subaryanto<br>Abdul Aziz<br>(ada disenting opinion) | Korupsi APBD Singkawang Tahun 2003                             | 12 mantan anggota DPRD Singkawang: Soemardji (mantan Ketua DPRD Singkawang), Hermanus (wakil ketua), dan Adrianto Alio (wakil ketua). Sementara sebagai panitia anggaran, yakni Tambok Pardede (ketua), dengan anggota antara lain Hadi Surya, Tavip Putra Purba, Aminuddin Mahyan, H Zainal Abidin HZ, JM Papilaya, Irene Kadem, Ridha Wahyudi, dan Iis Sumiati | 1 tahun 3 bulan | Pengadilan Negeri Singkawang | 31 Mei 2005    |
| 3. | Margono<br>P. Napitupulu<br>JH Butar Butar          | Korupsi Hotel Kapuas Palace senilai Rp 3,3 miliar              | Tjemerlang Tje Pieter Tanuwidjaya                                                                                                                                                                                                                                                                                                                                | Tidak diketahui | Pengadilan Negeri Pontianak  | 2003           |
| 4. | MP Sitompul<br>JH Butar Butar<br>Arif Waluyo        | Korupsi penerbitan LC fiktif BNI                               | Honorius                                                                                                                                                                                                                                                                                                                                                         | Tidak diketahui | Pengadilan Negeri Pontianak  | 2004           |
| 5. | Juliana Wullur<br>Agus Budiarto<br>Erna Matauseja   | Korupsi anggaran pos DPRD Kota Manado dalam tahun 2003         | Mantan Ketua DPRD Johannes E. Tampi dan dua Wakil Ketua DPRD                                                                                                                                                                                                                                                                                                     | 8 tahun penjara | Pengadilan Negeri Manado     | 30 Mei 2005    |

| NO  | NAMA HAKIM                                             | PERKARA                                                                                               | TERDAKWA                                                                                                                                                                                                           | TUNTUTAN JPU    | TINGKAT PENGADILAN                | TANGGAL VONIS    |
|-----|--------------------------------------------------------|-------------------------------------------------------------------------------------------------------|--------------------------------------------------------------------------------------------------------------------------------------------------------------------------------------------------------------------|-----------------|-----------------------------------|------------------|
|     | Halimah Pontoh<br>Lenny Wati<br>Mulasimadhi            | dari Rp 11 miliar lebih menjadi Rp 20 miliar                                                          | Kota Manado, Jeremia amongilala dan Dja'far Alkatiri                                                                                                                                                               |                 |                                   |                  |
| 6.  | Juliana Wullur                                         | korupsi dana deposito Pemerintah Provinsi Sulawesi Utara Rp 72,15 miliar                              | Theis Tumakaka (Pemegang Kas Daerah) dan Jan F. Mailangkay (mantan Sekretaris Daerah Provinsi)                                                                                                                     | -               | Pengadilan Negeri Manado          | 30 Desember 2003 |
| 7.  | Sougeng Achmad Judhi                                   | korupsi Anggaran Pendapatan dan Belanja Daerah (APBD) Provinsi Sumatera Selatan senilai Rp 7,5 miliar | Abdul Shobur, mantan Sekretaris DPRD Sumatera Selatan                                                                                                                                                              | 4 tahun penjara | Pengadilan Negeri Palembang       | 14 Februari 2005 |
| 8.  | Johanes Suhadi                                         | Korupsi dana PT Jamsostek Tbk. (Jamsostek) senilai Rp 1,8 miliar                                      | Ketua umum Partai Buruh Sosial Demokrasi (PBSO) Muchtar Pakpahan                                                                                                                                                   | 8 tahun penjara | Pengadilan Negeri Jakarta Selatan | 15 Februari 2005 |
| 9.  |                                                        | korupsi dana kegiatan DPRD Ketua DPRD periode 1999-2004                                               | Wakil Walikota Bogor, Moch. Sahid                                                                                                                                                                                  | Putusan Sela    | Pengadilan Negeri Bogor           | 24 Januari 2005  |
| 10. | T Sagala<br>Sabar Prihantoro<br>Arif Rahman<br>Nugraha | korupsi APBD sebesar Rp 2,8 miliar oleh anggota DPRD Kabupaten Pontianak                              | Moses Alep (Ketua DPRD Kabupaten Pontianak, periode 1999-2004) , Efendi Cingkong (Wakil Ketua DPRD Kabupaten Pontianak, periode 1999-2004), H. Soetodjo (Wakil Ketua DPRD Kabupaten Pontianak, periode 1999-2004), | 2 tahun penjara | Pengadilan Negeri Pontianak       | 12 April 2005    |
| 11. | Sabar Prihantoro                                       | korupsi APBD sebesar                                                                                  | dua mantan anggota DPRD                                                                                                                                                                                            | 2 tahun         | Pengadilan                        | 21 April 2005    |

| NO  | NAMA HAKIM                                 | PERKARA                                                                                                              | TERDAKWA                                                                                                                                                                           | TUNTUTAN JPU     | TINGKAT PENGADILAN                | TANGGAL VONIS    |
|-----|--------------------------------------------|----------------------------------------------------------------------------------------------------------------------|------------------------------------------------------------------------------------------------------------------------------------------------------------------------------------|------------------|-----------------------------------|------------------|
|     | Arif Rahman Nugraha                        | Rp 2,8 miliar oleh anggota DPRD Kabupaten Pontianak                                                                  | Kabupaten Pontianak periode 1999-2004, M Makmur Abdullah dan Adrean Felix                                                                                                          | penjara          | Negeri Pontianak                  |                  |
| 12. | Muhammad Taufiq                            | Korupsi APBD Parigi Moutong sebesar Rp 2,9 miliar                                                                    | Lima anggota DPRD Kabupaten Parigi Moutong, Sulawesi Tengah, periode 2003-2004, yaitu M Awalunsyah Passau, Salam Kamu Tanjema, Nico Rantung, Andi Tjimbung Tagunu, dan Hafid Yahya | 5 tahun penjara  | Pengadilan Negeri Palu            | 22 Juni 2005     |
| 13. | I Wayan Rena Machmud Rachimi Achmad Sobari | Korupsi penyimpangan penggunaan dana Bulog sebesar Rp 169 miliar hasil penjualan minyak goreng sebesar Rp 169 miliar | Nurdin Halid, Ketua Koperasi Distribusi Indonesia                                                                                                                                  | 20 tahun penjara | Pengadilan Negeri Jakarta Selatan | 16 Juni 2005     |
| 14. | Humuntal Pane Abdul Fattah Amril           | Korupsi penyelundupan 73 ribu ton gula ilegal                                                                        | Kepala Divisi Perdagangan Umum Inkud, Abdul Waris Halid                                                                                                                            | 9 tahun penjara  | Pengadilan Negeri Jakarta Utara   | 5 Juli 2005      |
| 15. | Aljaman Sutopo Jon Lar Purba Mabruq Nur    | korupsi dalam penunjukan langsung 19 proyek Pemerintah Kota Bengkulu senilai Rp 7,6 miliar                           | Wali Kota Bengkulu, Chalik Effendi                                                                                                                                                 | 2 tahun penjara  | Pengadilan Negeri Bengkulu        | 14 Juli 2005     |
| 16. | Humuntal Pane Laurensius Sibarani          | Korupsi penyelundupan 56                                                                                             | Nurdin Halid, Ketua Koperasi Distribusi                                                                                                                                            | 10 tahun penjara | Pengadilan Negeri Jakarta         | 15 Desember 2005 |

| NO  | NAMA HAKIM                                  | PERKARA                                                                                                    | TERDAKWA                                                                                      | TUNTUTAN JPU               | TINGKAT PENGADILAN                        | TANGGAL VONIS       |
|-----|---------------------------------------------|------------------------------------------------------------------------------------------------------------|-----------------------------------------------------------------------------------------------|----------------------------|-------------------------------------------|---------------------|
|     | Amril                                       | ribu ton gula ilegal                                                                                       | Indonesia                                                                                     |                            | Utara                                     |                     |
| 17. | Margono<br>Yansen Pasaribu<br>Agung Nugroho | Korupsi Rp46,6 Miliar<br>di DPRD Kutim                                                                     | mantan ketua DPRD<br>Kutim. Abdal Nanang dan<br>Sekwan Darli Yusuf                            | 9 tahun<br>penjara         | Pengadilan<br>Negeri<br>Sangata           | 16 Desember<br>2005 |
| 18. | Lief Sofijullah                             | Korupsi PT Perhutani<br>sebesar Rp1,9 miliar                                                               | Direktur PT Avicom Promo<br>Media Deden Akbar<br>Karsawijaya                                  | 5 tahun<br>penjara         | Pengadilan<br>Negeri Jakarta<br>Pusat     | April 2005          |
| 19. | Ali Nafiah<br>Dalimunthe                    | Korupsi Suap untuk<br>pelolosan LPJ Bupati<br>Mandailing Natal<br>tahun 2001                               | Ir Raja Sahlan Nasution<br>dan Drs HM Suandi<br>Hasibuan.                                     | 1 tahun 6<br>bulan penjara | Pengadilan<br>Negeri Padang<br>Sidempuan  | 28 Maret<br>2005    |
| 20. | Jack J. Octavianus                          | korupsi dana pemilu<br>Rp 199,5 juta                                                                       | Ketua KPU Lumajang<br>Misbahul Munir Anshari                                                  | (putusan sela)             | Pengadilan<br>Negeri<br>Lumajang          | 30 Juni 2005        |
| 21. | Jessay Tarigan                              | Korupsi APBD<br>Konawe 2004 senilai<br>Rp 2 milyar                                                         | Bupati Kabupaten<br>Konawe, Sulawesi<br>Tenggara, Lukman<br>Abunawas                          | 3 tahun                    | Pengadilan<br>Negeri Kendari              | 23 Juni 2005        |
| 22. | Soebagyo<br>Wirosumarto                     | Korupsi<br>penggelembungan<br>dana pengadaan alat<br>berat eskavator dan<br>trailer sebesar Rp<br>539 juta | Budiono, Kesubdin<br>Operasional dan<br>Pemeliharaan DPU dan<br>Pengairan Kabupaten<br>Jember | 2 tahun 6<br>bulan         | Pengadilan<br>Negeri Jember               | 24 Agustus<br>2005  |
| 23. | Bambang Edy<br>Syahlan<br>Eko Budhi         | korupsi dana APBD<br>Kota Tanjungpinang<br>tahun 2003                                                      | Drs Asep Nana Suryana .<br>Ketua Fraksi Perkasa<br>DPRD Kota Tanjungpinang                    | -                          | Pengadilan<br>Negeri<br>Tanjung<br>Pinang | 19 Desember<br>2005 |
| 24. | Bambang Edy<br>Syahlan<br>Eko Budhi         | Korupsi Pengadaan<br>Kapal Natuna Bahari<br>I senilai Rp1,9 miliar                                         | Kepala Dinas Pariwisata<br>Natuna, Yusrizal.                                                  | -                          | Pengadilan<br>Negeri<br>Tanjung<br>Pinang | 2005                |
| 25. | Ali Nafiah                                  | Korupsi Suap untuk                                                                                         | Amru Helmi Daulay,                                                                            | 1 tahun                    | PN Padang                                 | 14 Januari          |



| NO  | NAMA HAKIM                                             | PERKARA                                                             | TERDAKWA                                                                                                                                                 | TUNTUTAN JPU                                                                            | TINGKAT PENGADILAN       | TANGGAL VONIS    |
|-----|--------------------------------------------------------|---------------------------------------------------------------------|----------------------------------------------------------------------------------------------------------------------------------------------------------|-----------------------------------------------------------------------------------------|--------------------------|------------------|
|     | Dalimunthe<br>Irwan Effendi<br>P. Silitonga            | pelolosan LPJ Bupati Mandailing Natal tahun 2001                    | Bupati Tk II Kab. Madina Sumatera Utara                                                                                                                  | penjara                                                                                 | Sidempuan                | 2005             |
| 26. | Bagir Manan<br>Parman Soeparman<br>Djoko Sarwoko       | Korupsi Suap untuk pelolosan LPJ Bupati Mandailing Natal tahun 2001 | Amru Helmi Daulay,<br>Bupati Tk II Kab. Madina Sumatera Utara                                                                                            | 1 tahun<br>penjara                                                                      | MA                       | 14 Juni 2005     |
| 27. | Joko Sedyono<br>Lilik Sudarsono<br>FX Jiwo Santosa     | Dugaan korupsi Yayasan Dakab senilai Rp 2 miliar                    | Amelia Yani, Glinding dan Ir Sayuti Rustam                                                                                                               | 4 tahun<br>penjara                                                                      | Pengadilan Negeri Sleman | 27 Agustus 2005  |
| 28. | Iskandar Kamil<br>Arbidjoto<br>Sunardi Padang          | Korupsi dana Yanatera Bulog sebesar Rp 35 miliar                    | Wakil Kepala Badan Urusan Logistik (Bulog) M. Sapuan                                                                                                     | -                                                                                       | MA                       | 29 Oktober 2004  |
| 29. | Parman Suparman<br>Arbijoto<br>(alm) Sunardi<br>Padang | korupsi BLBI Bank Umum Nasional (BUN) senilai Rp 6,738 triliun      | Kaharuddin Ongko (mantan wakil komisaris utama BUN)<br>Leonard Tanubrata (mantan Dirut BUN).                                                             | Ongko 19 tahun penjara dan Tanubrata selama 14 tahun penjara                            | MA                       | 1 September 2004 |
| 30. | Irwan<br>Lamsana Sipayung<br>Rukman Hadi               | korupsi APBD Cianjur senilai Rp 3 miliar                            | Ketua DPRD Cianjur, H. Deden Zaini Dahlan, S.H., Sekretaris DPRD, Hj. Nani Anggraeni, S.H., dan Kepala Sub. Keuangan DPRD, Hj. Tinoy Kustini Subli, S.H. | Deden Zaeni Dahlan (5 tahun penjara)<br>Nani Anggraeni, Tinoy Kustini (3 tahun penjara) | PN Cianjur               | 24 Juni 2004     |
| 31. | Bantu Ginting                                          | Korupsi dana Pemkab Kolaka Rp 3 miliar                              | Mantan Bupati Kolaka, Sulawesi Tenggara, Adel Berty                                                                                                      | 8 tahun<br>penjara                                                                      | Pengadilan Negeri Kolaka | 3 Desember 2004  |
| 32. | Edy Nugroho<br>Binsar P Pakpahan                       | korupsi Rp 4,4 miliar dalam kasus jual-beli                         | mantan direktur utama PTPN XII, Ir Soewadji, dan                                                                                                         | 6 tahun<br>penjara                                                                      | PN Surabaya              | 4 Mei 2004       |

| NO  | NAMA HAKIM                            | PERKARA                                                                                 | TERDAKWA                                                                                                                                                                                                                                                                      | TUNTUTAN JPU            | TINGKAT PENGADILAN | TANGGAL VONIS    |
|-----|---------------------------------------|-----------------------------------------------------------------------------------------|-------------------------------------------------------------------------------------------------------------------------------------------------------------------------------------------------------------------------------------------------------------------------------|-------------------------|--------------------|------------------|
|     |                                       | gula fiktif                                                                             | mantan direktur keuangan PTPN XI, Drs Adyarto Mochtar                                                                                                                                                                                                                         |                         |                    |                  |
| 33. | H. Dam Dam Bachtiar                   | Korupsi proyek pengadaan buku pokok SD dan SLTP Lampung tahun 2002 senilai Rp6,3 miliar | Kepala Dinas Pendidikan Nasional Lampung non-aktif, Sutoto, S.H                                                                                                                                                                                                               | 3 tahun penjara         | PN Tanjung Karang  | 1 Maret 2004     |
| 34. | Dehel K Sandan Togar Purwanto         | Korupsi dana APBD tahun 2001 sebesar sekitar Rp 1 miliar                                | Tiga mantan pimpinan DPRD Cirebon adalah H Suryana (sekarang anggota DPR RI), H Sunaryo HW (sekarang ketua DPRD Kota Cirebon) dan H Haries Sutamin.                                                                                                                           | 2 Tahun penjara         | PN Cirebon         | 27 Desember 2004 |
| 35. | Anom Hartanindita S Silalahi Jemmy WL | Korupsi dana APBD tahun 2001 sebesar sekitar Rp 1 miliar                                | Tujuh mantan anggota DPRD Kota Cirebon periode 1999-2004. Ketujuh mantan anggota DPRD itu adalah Jarot Adi Sutarto (PDI-P), Enang Iman Gana (PKPI), Setiawan (PAN), Agus Sompri (Partai Golkar), Suyatno AH Saman (PKB), M Safari Wartoyo (PPP), serta Achmad Djuanedi (PBB). | 1 tahun 6 bulan penjara | PN Cirebon         | 27 Desember 2004 |
| 36. | Husni Rizal                           | korupsi dana Pemprov Banten sebesar Rp 1,7 miliar                                       | Abdul Rahman Sabit                                                                                                                                                                                                                                                            |                         | PN Serang          | 28 Oktober 2004  |
| 37. | Iskandar Tjakke Andi Samsan Nganro    | kasus korupsi Exxor I Balongan                                                          | Tabrani Ismail                                                                                                                                                                                                                                                                | 12 tahun penjara        | PN Jakarta Pusat   | 10 Desember 2003 |

| NO  | NAMA HAKIM                                                | PERKARA                                                                                                | TERDAKWA                                                                                                                                 | TUNTUTAN JPU    | TINGKAT PENGADILAN | TANGGAL VONIS     |
|-----|-----------------------------------------------------------|--------------------------------------------------------------------------------------------------------|------------------------------------------------------------------------------------------------------------------------------------------|-----------------|--------------------|-------------------|
|     | Andriani Nurdin                                           |                                                                                                        |                                                                                                                                          |                 |                    |                   |
| 38. | Isaac Jorgen                                              | Korupsi asuransi senilai Rp 1,2 miliar                                                                 | tiga mantan anggota Dewan Provinsi periode 1999-2004 yakni H Abdurrachman (PPP), Nurudin Haniem (PAN) dan HM Umar (PKB                   | Putusan Sela    | PN Yogya           | 4 November 2004   |
| 39. | Paulus Effendi Lotulung Parman Soeparman Arbijoto Muchsin | Korupsi dana non budgeter bulog senilai Rp 40 miliar                                                   | Akbar Tanjung                                                                                                                            | 4 tahun penjara | MA                 | 12 Februari 2004  |
| 40. | Saba'a M Tafkir Sartono Sarwedi Andreas                   | Korupsi pelepasan tanah dan bangunan bekas Kantor Pembantu Bupati Wilayah Delanggu senilai Rp 1 miliar | dua anggota DPRD Klaten Tantowi Jauhari dan Suwanto                                                                                      | 4 tahun penjara | PN Klaten          | 21 Juni 2004      |
| 41. | Cicut Sutiarto                                            | tindak pidana korupsi di PT Perhutani sebesar Rp1,9 miliar                                             | Kepala Divisi Perencanaan dan Pengembangan (Kadiv Renbang) PT Perhutani Bambang Adji Sutjahyo                                            | -               | PN Jakarta Pusat   | 29 November 2004  |
| 42. | Wimpie Sekewael Soeroso Ono Yan Mulyana.                  | Korupsi Beras OPK sebesar Rp. 1, 2 miliar                                                              | Bupati Sampang, Provinsi Jawa Timur, Fadhilah Budiono Sekretaris Daerah Kabupaten Sampang Drs Asyhar dan Direktur CV Amin Jaya, Aminudin | 1 tahun penjara | PN Surabaya        | 8 Januari 2004    |
| 43. | Bustami Nusyirwan                                         | korupsi APBD Tahun 2002 sebesar Rp 7,6 miliar                                                          | Sekretaris Daerah Kepulauan Mentawai Ridwan Siritubui, Bendaharawan Rutin Sekda Rika Hasnita,                                            | 5 tahun penjara | PN Padang          | 18 September 2004 |

| NO  | NAMA HAKIM                                                  | PERKARA                                                                                                             | TERDAKWA                                                                  | TUNTUTAN JPU            | TINGKAT PENGADILAN                          | TANGGAL VONIS     |
|-----|-------------------------------------------------------------|---------------------------------------------------------------------------------------------------------------------|---------------------------------------------------------------------------|-------------------------|---------------------------------------------|-------------------|
|     |                                                             |                                                                                                                     | Kepala Bagian Keuangan D. Lubis, dan bekas Bendaharawan Rutin Sekda Ardi. |                         |                                             |                   |
| 44. | Husni Sulaiman                                              | korupsi Inpres Proyek Jalan Kabupaten (IPJK) tahun 1993 hingga 1998 dengan kerugian negara sebesar Rp. 289,335 juta | Bupati Kabupaten Kendari Drs. Abdul Razak Porosi                          | -                       | PN Kendari                                  | 15 Maret 2003     |
| 45. | Bachtiar AMS                                                | korupsi Yayasan Dana Kesejahteraan (Yanatera) Bulog                                                                 | Mulyono dan M. Jacob Ishak                                                | 2 tahun 6 bulan penjara | PN Jakarta Selatan                          | 24 Februari 2003  |
| 46. | I Wayan Padang Pudjawan<br>I Wayan Sugawa<br>I Gde Damendra | korupsi di tubuh Yayasan Bali Dwipa (YBD) Rp 720 juta                                                               | Mantan Gubernur Bali Ida Bagus Oka                                        | 1 Tahun penjara         | PN Denpasar                                 | 8 April 2002      |
| 47. | Ridwan Nasution<br>I Gde Ketut Sukarata<br>Soeparno         | Korupsi skandal cessie Bank Bali (BB) dan PT Era Giat Prima (EGP) senilai Rp 904,6 miliar                           | Mantan Gubernur Bank Indonesia Syahril Sabirin                            | 4 tahun penjara         | PT Jakarta                                  | 12 Agustus 2002   |
| 48. | German Hoediarto                                            | Korupsi skandal cessie Bank Bali (BB) dan PT Era Giat Prima (EGP) senilai Rp 904,6 miliar                           | Mantan Gubernur Bank Indonesia Syahril Sabirin                            | 4 tahun penjara         | MA                                          | 21 September 2004 |
| 49. |                                                             | Korupsi simpanan wajib khusus petani (SWKP) Pusat Koperasi Unit Desa (Puskud) Hasanuddin                            | Nurdin Halid                                                              |                         | Pengadilan Negeri Bantaeng Sulawesi Selatan |                   |

| NO  | NAMA HAKIM                           | PERKARA                                                                             | TERDAKWA                                                                                                   | TUNTUTAN JPU     | TINGKAT PENGADILAN                | TANGGAL VONIS    |
|-----|--------------------------------------|-------------------------------------------------------------------------------------|------------------------------------------------------------------------------------------------------------|------------------|-----------------------------------|------------------|
|     |                                      | sebesar Rp 115,7 milyar.                                                            |                                                                                                            |                  |                                   |                  |
| 50. |                                      | Korupsi Dana KUT Rp 6,15 miliar                                                     | Ketua LSM Pusat Peranserta Masyarakat (PPM) Bambang Soemadji dan Manajer Koperasi "Subur Makmur", Sonhadji | 6 tahun penjara  | PN Kediri                         |                  |
| 51. |                                      | korupsi dana KUT Kabupaten Malang masa taniam 1998-1999 sebesar Rp 8 miliar         | Soegeng Ismoe, Presidium PPM Dati II                                                                       |                  | PN Malang                         | Januari 2001     |
| 52. | Soenarto I Dewa Gde Putrajadnya      | Korupsi Skandal Bank Bali yang mengakibatkan kerugian negara senilai Rp. 546 miliar | Pande Lubis                                                                                                | 4 tahun penjara  | Pengadilan Negeri Jakarta Selatan | 23 November 2000 |
| 53. | Soedarto Sultan Mangun M Ritonga     | Korupsi Skandal Bank Bali yang mengakibatkan kerugian negara senilai Rp. 546 miliar | Joko S Tjandra                                                                                             | 18 Bulan Penjara | Pengadilan Negeri Jakarta Selatan | 2 Maret 2000     |
| 54. | Hakim Sunu Wahadi M. Said Harahap    | Korupsi Skandal Bank Bali yang mengakibatkan kerugian negara senilai Rp. 546 miliar | Joko S Tjandra                                                                                             | 18 Bulan Penjara | MA                                | 26 Juni 2001     |
| 55. | Soedarto Usman Dani Achmad M Munawir | Korupsi Skandal Bank Bali yang mengakibatkan kerugian negara senilai Rp. 546 miliar | Rudy Ramly<br>Hendri Kurniawan<br>Rusli Suryadi<br>Firman Soetjahja                                        | Putusan Sela     | Pengadilan Negeri Jakarta Selatan | 29 November 1999 |
| 56. | R Soenarto                           | Korupsi Tukar Guling                                                                | Hutomo Mandala Putra                                                                                       | 2 Tahun          | Pengadilan                        | 19 November      |

| NO  | NAMA HAKIM                                                                  | PERKARA                                                                                     | TERDAKWA                                   | TUNTUTAN JPU          | TINGKAT PENGADILAN                | TANGGAL VONIS     |
|-----|-----------------------------------------------------------------------------|---------------------------------------------------------------------------------------------|--------------------------------------------|-----------------------|-----------------------------------|-------------------|
|     |                                                                             | tanah Bulog dengan Goro telah merugikan negara sebesar Rp 96,6 milyar                       |                                            | penjara               | Negeri Jakarta Selatan            | 1999              |
| 57. | Djalius Amin                                                                | Korupsi Tukar Guling tanah Bulog dengan Goro telah merugikan negara sebesar Rp 96,6 milyar  | Ricardo Gelael                             | 2 Tahun penjara       | Pengadilan Negeri Jakarta Selatan | 19 November 1999  |
| 58. | Zoeber Djajadi                                                              | Korupsi Tukar Guling tanah Bulog dengan Goro telah merugikan negara sebesar Rp 96,6 milyar. | Hokiarto                                   | Putusan Sela          | Pengadilan Negeri Jakarta Selatan | 5 September 2002  |
| 59. | Lalu Mariyun Soedarto Sultan Mangun I Dewa Gde Putrajadnya Mohammad Munawir | Dugaan penyimpangan dana tujuh yayasan yang dipimpinnya                                     | HM Soeharto                                | Dihentikan oleh hakim | Pengadilan Negeri Jakarta         | 28 September 2000 |
| 60. | Soedarto                                                                    | Korupsi dana Promes dari PT Jasindo pada Medco                                              | Arifin Panigoro                            | Putusan Sela          | Pengadilan Negeri Jakarta Selatan | -                 |
| 61. | I Dewa Gde Putrajadnya                                                      | Korupsi di BPUI senilai Rp 369 miliar                                                       | Sudjiono Timan                             | 8 tahun penjara       | Pengadilan Negeri Jakarta Selatan | 25 November 2002  |
| 62. | I Dewa Gde Putrajadnya                                                      | Korupsi suap sebesar Rp 100 juta                                                            | Zainal Agus, Direktur Tata Usaha Negara MA | Putusan Sela          | Pengadilan Negeri Jakarta Selatan | 5 Juli 2001       |

| NO  | NAMA HAKIM                                              | PERKARA                                                        | TERDAKWA                                                 | TUNTUTAN JPU                         | TINGKAT PENGADILAN              | TANGGAL VONIS     |
|-----|---------------------------------------------------------|----------------------------------------------------------------|----------------------------------------------------------|--------------------------------------|---------------------------------|-------------------|
| 63. | Rusdi Asad                                              | Korupsi BLBI Bank Modern Rp 169 milyar                         | Samadikun Hartono                                        | 1 tahun penjara                      | PN Jakarta Pusat                | 2 Agustus 2002    |
| 64. | Amiruddin Zakaria<br>Andi Samsan Nganro<br>I Ketut Gede | Korupsi BLBI Bank Umum Nasional senilai RP 6,7 triliun         | Kaharudin Ongko                                          | 10 tahun penjara                     | PN Jakarta Pusat                | 10 Januari 2003   |
| 65. |                                                         | Korupsi BLBI Bank Umum Nasional senilai RP 6,7 triliun         | Leonard Tanubrata                                        | 15 tahun penjara                     | PT DKI Jakarta                  | 12 Oktober 2003   |
| 66. | Rusdi Asyad<br>Musa Simatupang<br>Andi Samsan Nganro    | Dugaan suap senilai Rp 196 juta oleh Endin Wahyuddin           | Supraptini Sutarto<br>Ny Marnis Kahar                    | Putusa Sela (dakwaan tidak diterima) | Pengadilan Negeri Jakarta Pusat | 22 Agustus 2001   |
| 67. | PA Sianipar                                             | Dugaan suap senilai Rp 196 juta oleh Endin Wahyuddin           | Yahya Harahap                                            | Putusa Sela (dakwaan tidak diterima) | Pengadilan Negeri Jakarta Barat | 22 Agustus 2001   |
| 68. | Samang Hamidi                                           | Korupsi Penyaluran BLBI senilai Rp 2 Triliun                   | Paul Sutopo, Heru Suprptomo dan Hendro Budiyanto         | 5 tahun penjara                      | PT DKI Jakarta                  | 29 Desember 2001  |
| 69. | Taufik German Hoediarso<br>Soeharto                     | Korupsi Ruislag Goro Batara Sakti dengan Bulog                 | Hotumo Mandala Putra                                     | 1 tahun penjara                      | Peninjauan Kembali MA           | 14 September 2001 |
| 70. | Faturrahman                                             | Korupsi di Dinas Pendidikan dan Kebudayaan sebesar Rp 270 juta | Kepala Dinas P dan K Klaten, H Muhadi SH,                | 30 bulan penjara                     | PN Klaten                       | 30 Desember 2003  |
| 71. | Faturrahman                                             | Korupsi di Dinas Pendidikan dan Kebudayaan sebesar Rp 270 juta | Mantan Kasubag TU dan Perlengkapan Prihatin Hadi Purnomo | 24 bulan penjara                     | PN Klaten                       | 30 Desember 2003  |
| 72. | Faturrahman                                             | Korupsi di Dinas Pendidikan dan                                | Staf Subag TU dan Perlengkapan Purwanto                  | 24 bulan penjara                     | PN Klaten                       | 30 Desember 2003  |

| NO  | NAMA HAKIM                                    | PERKARA                                                                                                                                                         | TERDAKWA                                                                                                                    | TUNTUTAN JPU    | TINGKAT PENGADILAN              | TANGGAL VONIS    |
|-----|-----------------------------------------------|-----------------------------------------------------------------------------------------------------------------------------------------------------------------|-----------------------------------------------------------------------------------------------------------------------------|-----------------|---------------------------------|------------------|
|     |                                               | Kebudayaan sebesar Rp 270 juta                                                                                                                                  |                                                                                                                             |                 |                                 |                  |
| 73. | -                                             | Korupsi proyek lampu jalan                                                                                                                                      | Murjito, mantan Kadis Tata Kota dan Lingkungan Hidup Kota Metro                                                             | -               | Pengadilan Negeri Metro         | 10 Juli 2003     |
| 74. | Sri Kasyani                                   | korupsi gaji ganda Rp70 juta                                                                                                                                    | Drs H. Maman Setiawan, anggota DPRD Kota Bandung dari Fraksi Partai Amanat Nasional                                         | 1 tahun penjara | Pengadilan Negeri Bandung       | 12 Mei 2005      |
| 75. | Syafaruddin Nasution Yapi Rahmawati           | korupsi dana operasi bibir sumbing dan katarak senilai Rp 360 juta                                                                                              | Wakil Kepala Dinas Kesehatan Provinsi Nanggroe Aceh Darussalam (NAD) T Muhamad                                              | 1 tahun penjara | Pengadilan Negeri Banda Aceh    | 28 januari 2004  |
| 76. | Kusnoto Mardiyanto Jan Mannopo                | korupsi di kantor Dinas Perindustrian dan Perdagangan (Disperindag) Cirebon                                                                                     | Pejabat staf ahli Bupati Cirebon, Nunung Sumarsana                                                                          | 2 tahun penjara | Pengadilan Negeri Cirebon       | 3 Mei 2005       |
| 77. | Cicut Sutiarso                                | Korupsi pengelembungan dana proyek pembangunan pembangkit listrik tenaga panas bumi Karaha Bodas, Garut, senilai US\$ 143,1 juta atau sekitar Rp 1,431 triliun. | Prianto (Kepala Divisi Panas Bumi Direktorat Eksplorasi Produksi) dan Syafei Sulaiman (Kepala Dinas Perencanaan Panas Bumi) | 9 tahun         | Pengadilan Negeri Jakarta Pusat | 24 Januari 2006  |
| 78. | Gatot Suharnoto I Ketut Manika Mahmud Rachimi | pemberian kredit kepada PT Cipta Graha Nusantara (CGN) senilai Rp 160                                                                                           | ECW Neloe, I Wayan Pugeg, dan M. Sholeh Tasripan                                                                            | 20 tahun        | Pengadilan Negeri Jakarta Pusat | 20 Februari 2006 |



| NO  | NAMA HAKIM                                      | PERKARA                                                                                        | TERDAKWA                                                                                      | TUNTUTAN JPU | TINGKAT PENGADILAN                   | TANGGAL VONIS    |
|-----|-------------------------------------------------|------------------------------------------------------------------------------------------------|-----------------------------------------------------------------------------------------------|--------------|--------------------------------------|------------------|
|     |                                                 | miliar                                                                                         |                                                                                               |              |                                      |                  |
| 79. | Sri Mulyani Sulthoni                            | pemberian kredit kepada PT Cipta Graha Nusantara (CGN) senilai Rp 160 miliar                   | Edyson, Saiful Anwar, dan Diman Ponijan, tiga pengurus PT Cipta Graha Nusantara               | 17 tahun     | Pengadilan Negeri Jakarta Pusat      | 23 Februari 2006 |
| 80. | Fauzie Ishak Pujiastuti Handayani WH Van Keeken | kasus korupsi pengadaan lahan TPU di Bekasi, yang mengakibatkan kerugian negara Rp 6,49 miliar | Damanhuri Husein, Mantan Asisten Tata Praja Kabupaten Bekasi                                  | 8 tahun      | Pengadilan Negeri Bekasi             | 22 Maret 2006    |
| 81. | Lief Sufidjullah                                | kasus korupsi pengadaan logistik Pemilu 2004 di wilayah DKI Jakarta berjumlah Rp488,5 juta.    | A Riza Patria, Anggota Komisi Pemilihan Umum Daerah (KPUD) DKI Jakarta                        | 18 bulan     | Pengadilan Negeri (PN) Jakarta Pusat | 28 April 2006    |
| 82. | M. Sabir, S.H. Irwandi, S.H. Hamzah, S.H.       | Kasus korupsi pencairan kasbon APBD oleh anggota DPRD Aceh Singkil sebesar Rp 1.733.119.635    | H. Makmursyah Putra, SH, Drs H Mu'adz Vohry, MM H Ridwan Hasan, SH, MM H Bicar Sinaga, SH, MM | 2 tahun      | Pengadilan Negeri Aceh Singkil       | 30 Januari 2006  |

Dok. ICW : Diolah dari berbagai sumber Media

Lampiran 12

**Judicial Review terhadap UU 31/1999 jo UU 20/2001 & UU 30/2002 tentang KPK**

| No. | Undang-Undang                                                                                      | Posisi Kasus                                                                                                                                                                                                                                                                                                                                                                   | Bagian yang diuji                                                                                                     | <i>Ratio Decidendi</i><br>(Pertimbangan Hakim)                                                                                                                                                                                                                                                                                                                                                                                                                                                                                                                                                                                                                                                                           | Putusan                                                                                                                                                                                                            | Implikasi Yuridis                                                                                                                                                                                                                                                                                     |
|-----|----------------------------------------------------------------------------------------------------|--------------------------------------------------------------------------------------------------------------------------------------------------------------------------------------------------------------------------------------------------------------------------------------------------------------------------------------------------------------------------------|-----------------------------------------------------------------------------------------------------------------------|--------------------------------------------------------------------------------------------------------------------------------------------------------------------------------------------------------------------------------------------------------------------------------------------------------------------------------------------------------------------------------------------------------------------------------------------------------------------------------------------------------------------------------------------------------------------------------------------------------------------------------------------------------------------------------------------------------------------------|--------------------------------------------------------------------------------------------------------------------------------------------------------------------------------------------------------------------|-------------------------------------------------------------------------------------------------------------------------------------------------------------------------------------------------------------------------------------------------------------------------------------------------------|
| 01. | UU 31 Tahun 1999<br>jo<br>UU 20 Tahun 2001<br>tentang<br>Pemberantasan<br>Tindak Pidana<br>Korupsi | <i>Pertama,</i><br><b>Perkara Nomor 003/PUU-IV/2006</b><br>Pemohon: <b>Dawud Djatmiko</b> <ul style="list-style-type: none"> <li>Di dailikan bahwa kata “dapat” pada Pasal 2 bermakna ganda, sehingga menimbulkan ketidakpastian hukum.</li> <li>Berhubungan dengan “percobaan” melakukan tindak pidana yang ancaman hukumannya disamakan dengan perbuatan selesai.</li> </ul> | Pasal 2 ayat (1) beserta penjelasan; Pasal 3; dan Pasal 15 UU TPK.<br>Bertentangan dengan Pasal 28D ayat (1) UUD 1945 | <ul style="list-style-type: none"> <li>Kata “dapat” dalam Pasal 2 ayat (1) UU PTPK, lebih merupakan persoalan pelaksanaan dalam praktik oleh aparat penegak hukum, dan bukan menyangkut konstitusionalitas norma;</li> <li>Penjelasan Pasal 2 ayat (1) telah melahirkan norma baru. Penjelasan yang demikian telah menyebabkan kriteria perbuatan melawan hukum (Pasal 1365 KUHPerdara) mengenai (<i>onrechtmatigedaad</i>), seolah-olah telah diterima menjadi satu ukuran melawan hukum dalam hukum pidana (<i>wederrechtelijkheid</i>).</li> <li>Penjelasan Pasal 2 ayat (1) UU PTPK tidak sesuai dengan perlindungan dan jaminan kepastian hukum yang adil yang dimuat dalam Pasal 28D ayat (1) UUD 1945.</li> </ul> | >> dissenting opinion oleh Prof. Dr. H.M. Laica Marzuki, SH<br>>> PUTUSAN:<br>Menyatakan penjelasan Pasal 2 ayat (1) UU 31/1999 jo 20/2001 bertentangan dengan UUD 1945 & Tidak mempunyai kekuatan hukum mengikat. | Meskipun Mahkamah Agung tetap berpendapat bahwa Mahkamah Agung tetap menganut adanya unsur melawan hukum materil meskipun MK membatalkan penjelasan pasal 2 ayat (1) UU PTPK, karena tanpa penjelasan pun, semua unsur melawan hukum dalam pidana dapat dipahami mengandung unsur formil dan materil. |

| No. | Undang-Undang                                         | Posisi Kasus                                                                                                                                                                                                                                                                                                                                                                                                                                                                                                                                                                                                                                                   | Bagian yang diuji                                                                                                                                               | Ratio Decidendi<br>(Pertimbangan Hakim)                                                                                                                                                                                                                                                                                                                                                                                                                                                                                                                                                                                                     | Putusan                                                                                                                                                             | Implikasi Yuridis                                                                                                   |
|-----|-------------------------------------------------------|----------------------------------------------------------------------------------------------------------------------------------------------------------------------------------------------------------------------------------------------------------------------------------------------------------------------------------------------------------------------------------------------------------------------------------------------------------------------------------------------------------------------------------------------------------------------------------------------------------------------------------------------------------------|-----------------------------------------------------------------------------------------------------------------------------------------------------------------|---------------------------------------------------------------------------------------------------------------------------------------------------------------------------------------------------------------------------------------------------------------------------------------------------------------------------------------------------------------------------------------------------------------------------------------------------------------------------------------------------------------------------------------------------------------------------------------------------------------------------------------------|---------------------------------------------------------------------------------------------------------------------------------------------------------------------|---------------------------------------------------------------------------------------------------------------------|
| 02. | UU 30 Tahun 2002 tentang Komisi Pemberantasan Korupsi | <p><i>Pertama,</i><br/> <b>Perkara Nomor 006/PUU-I/2003</b><br/>           Pemohon: <b>Anggota KPKPN, &amp; Muchyat, H. Paiman Manansastro cs.</b></p> <ul style="list-style-type: none"> <li>• Pemohon mendalilkan, proses pembentukan UU KPK bertentangan dengan UUD 1945, karena tidak menyebutkan Tap MPR No.XI/MPR/1998 dan Tap MPR No.VIII/MPR/2001 sebagai dasar pembentukan UU KPK.</li> <li>• Berhubungan dengan keberatan pemohon tentang kewenangan melakukan penyadapan.</li> <li>• Didalilkan, Surat Penghentian Penyidikan sangat diperlukan dalam hubungan dengan pemberhentian pejabat sementara demi kepastian hukum dan keadilan.</li> </ul> | Pengujian Formil (Proses pembentukan UU KPK);<br>Pasal 13 huruf a, 12 ayat (1) huruf a dan i, 40, 69 ayat (1) dan (2), 26 ayat (3) huruf a, 71 ayat (2) UU KPK. | <ul style="list-style-type: none"> <li>• Dengan diterbitkannya UU 30/2002 yang antara lain mengatur berakhirnya keberadaan (<i>eksistensi</i>) KPKPN dan pengalihan fungsinya pada KPK, maka pembuat undang-undang telah menjalankan wewenangnya sesuai dengan Undang-Undang Dasar.</li> <li>• MK berpendapat bahwa Pemohon I (KPKPN) <b>tidak memiliki kedudukan hukum (<i>legal standing</i>)</b> untuk bertindak selaku Pemohon dalam permohonan.</li> <li>• Penilaian dari sudut <i>legal drafting</i> tidak dapat dijadikan alasan oleh MK untuk menyatakan bahwa pembentukan UU <i>a quo</i> tidak sesuai dengan UUD 1945.</li> </ul> | <ul style="list-style-type: none"> <li>• Menyatakan permohonan Pemohon I tidak dapat diterima;</li> <li>• Menolak permohonan Para Pemohon II seluruhnya;</li> </ul> | UU KPK tetap berlaku seperti sejak diterbitkan dan pembubaran KPKPN seperti yang diatur dalam UU KPK tetap berlaku. |
|     |                                                       | <p><i>Kedua,</i><br/> <b>Perkara Nomor 069/PUU-II/2004</b><br/>           Pemohon: <b>Bram H.D. Manoppo, MBA</b><br/>           Pemohon mengajukan uji materil berhubungan dengan status sebagai tersangka dalam perkara tindak pidana</p>                                                                                                                                                                                                                                                                                                                                                                                                                     | Pasal 68 UU KPK,<br>Yang berhubungan dengan Pasal 70 dan 72 UU                                                                                                  | <ul style="list-style-type: none"> <li>• Asas Legalitas (<i>non-retroaktif</i>) hanya menyangkut hukum materil;</li> <li>• Pasal 68 mengatur pengambilalihan perkara yang telah ditangani</li> </ul>                                                                                                                                                                                                                                                                                                                                                                                                                                        | MENOLAK Permohonan Pemohon                                                                                                                                          | Meskipun MK menolak permohonan pemohon untuk membatalkan Pasal 68, namun putusan ini berimplikasi tidak             |

| No. | Undang-Undang | Posisi Kasus                                                                                                                                                                                                                                                                                                                                                                                                                                                                                                                                                                                                          | Bagian yang diuji                                                                                                                                                     | Ratio Decidendi (Pertimbangan Hakim)                                                                                                                                                                                                                                                                                                                                              | Putusan                             | Implikasi Yuridis                                                                                        |
|-----|---------------|-----------------------------------------------------------------------------------------------------------------------------------------------------------------------------------------------------------------------------------------------------------------------------------------------------------------------------------------------------------------------------------------------------------------------------------------------------------------------------------------------------------------------------------------------------------------------------------------------------------------------|-----------------------------------------------------------------------------------------------------------------------------------------------------------------------|-----------------------------------------------------------------------------------------------------------------------------------------------------------------------------------------------------------------------------------------------------------------------------------------------------------------------------------------------------------------------------------|-------------------------------------|----------------------------------------------------------------------------------------------------------|
|     |               | <p>korupsi yang diperiksa oleh Komisi Pemberantasan Korupsi (KPK) atas sangkaan melakukan tindak pidana korupsi pengadaan Helikopter M1-2 merk PLC Rostov Rusia milik Pemerintah Propinsi Nanggroe Aceh Darusallam (NAD) pada sekitar tahun 2001/Juli 2002 berdasarkan Pasal 2 dan Pasal 3 UU No.31 Tahun 1999 jo UU No. 20 Tahun 2001 jo Pasal 55 KUHP.</p> <p>Berhubungan dengan asas berlaku surut yang diterapkan KPK dalam penahanan dirinyam yakni KPK dinilai hanya mempunyai kewenangan menangani perkara pasca 27 Desember 2002. Padahal <i>tempus delicti</i> adalah sekitar tahun 2001 atau Juli 2002.</p> | KPK.                                                                                                                                                                  | <p>Kepolisian atau Kejaksaan, sehingga MK menilai bahwa pasal ini tidak mengandung aturan yang berlaku surut.</p> <ul style="list-style-type: none"> <li>Namun, berdasarkan Pasal 72, UU KPK berlaku ke depan (prospektif) terhitung sejak 27 Desember 2002. Sehingga, semua ketentuan UU KPK hanya dapat diberlakukan untuk penanganan perkara setelah UU KPK terbit.</li> </ul> |                                     | dapatnya KPK menangani perkara yang terjadi sebelum terbentuknya UU KPK, yakni setelah 27 Desember 2002. |
|     |               | <p><i>Ketiga,</i><br/> <b>Perkara Nomor 010/PUU-IV/2006</b><br/> Pemohon: <b>AH.Wakil Kamal, SH.</b></p> <ul style="list-style-type: none"> <li>Mempersoalkan kewenangan KPK yang melebihi institusi Kepolisian dan Kejaksaan serta dalam hubungan dengan konsep pembagian kekuasaan.</li> <li>KPK dinilai gagal karena hanya memeriksa kasus kecil.</li> <li>KPK yang mempunyai kewenangan</li> </ul>                                                                                                                                                                                                                | <p>Konsideran"Me nimbang" huruf b, huruf c:<br/> Pasal 1 ayat (3), 2, 3, 4, 6, 7, 8, 9, 10, 11, 14, 20, 21 ayat (4), 26, 38, 39, 41, 42, 43 ayat (1) dan (2), 44,</p> | <p>Dengan tidak terpenuhinya persyaratan sebagaimana dimaksud Pasal 51 ayat (1) UUMK, yang dengan demikian mengakibatkan Pemohon tidak memenuhi syarat kedudukan hukum (<i>legal standing</i>) sebagai Pemohon</p>                                                                                                                                                                | Pemohon <b>tidak dapat diterima</b> | UU KPK tetap berlaku seperti sejak diterbitkan.                                                          |

| No. | Undang-Undang | Posisi Kasus                                                                                                                                                                                                                                                                                                                                                                                                                                                                                                                                                                                                | Bagian yang diuji                                                                                              | Ratio Decidendi<br>(Pertimbangan Hakim)                                                                                                                                                                                                                                                                                                                                                                                                                                                                | Putusan                                                                                                           | Implikasi Yuridis |
|-----|---------------|-------------------------------------------------------------------------------------------------------------------------------------------------------------------------------------------------------------------------------------------------------------------------------------------------------------------------------------------------------------------------------------------------------------------------------------------------------------------------------------------------------------------------------------------------------------------------------------------------------------|----------------------------------------------------------------------------------------------------------------|--------------------------------------------------------------------------------------------------------------------------------------------------------------------------------------------------------------------------------------------------------------------------------------------------------------------------------------------------------------------------------------------------------------------------------------------------------------------------------------------------------|-------------------------------------------------------------------------------------------------------------------|-------------------|
|     |               | tak terbatas (absolut) bertentangan dengan nilai kedaulatan rakyat.                                                                                                                                                                                                                                                                                                                                                                                                                                                                                                                                         | 45, 46, 47, 48, 49, 50, 51, 52, 53, 54, 55, 56, 57, 58, 60, 61, 62, 63 UU KPK.                                 |                                                                                                                                                                                                                                                                                                                                                                                                                                                                                                        |                                                                                                                   |                   |
|     |               | <p><i>Keempat,</i><br/> <b>Perkara Nomor 012/PUU-II/2006</b><br/>           Pemohon: <b>Mulyana Wirakusumah</b></p> <ul style="list-style-type: none"> <li>• Pasal 6 huruf c telah menjadikan KPK sebagai lembaga superbody yang bukan hanya memiliki otoritas tanpa batas yang bermuara pada pelanggaran HAM, tetapi juga telah mengacaukan sistem hukum yang berlaku di Negara RI. Sehingga menyebabkan tidak adanya kepastian hukum.</li> <li>• Pada dasarnya kerahasiaan informasi yang dimiliki oleh seseorang adalah hak pribadi yang harus dilindungi sehingga penyadapan harus dilarang.</li> </ul> | Pasal 6 huruf c, dan Pasal 12 ayat (1) huruf a.<br>BERTENTANGAN dengan Pasal 28D ayat (1) & Pasal 28F UUD 1945 | <ul style="list-style-type: none"> <li>• Mahkamah berpendapat bahwa dalil para Pemohon sepanjang menyangkut inkonstitusionalitas Pasal 1 Angka 3 UU KPK adalah tidak beralasan.</li> <li>• Telah terjadi kesesatan dalam penalaran hukum (<i>fallacy</i>) Pemohon III (<b>No. 019/PUU-II/2006</b>). Karena, sesuatu yang oleh Pemohon dianggap sebagai penyebab ketidakpastian (<i>in casu</i> Pasal 72 UU KPK) namun jika penyebab itu ditiadakan maka yang didapat justru ketidakpastian;</li> </ul> | Putusan untuk perkara No. 012, 019 & 019/PUU-IV/2006 digabung dalam satu berkas.<br>>> Menolak ketiga permohonan. |                   |
|     |               | <p><i>Kelima,</i><br/> <b>Perkara Nomor 016/PUU-II/2006</b><br/>           Pemohon: <b>Nazaruddin Sjamsuddin cs</b></p> <ul style="list-style-type: none"> <li>• Pasal 1 angka 3 dikaitkan dengan Pasal 53 UU KPK Melanggar Prinsip Kemandirian dan Kemerdekaan</li> </ul>                                                                                                                                                                                                                                                                                                                                  | Pasal 1 angka 3; Pasal 2; Pasal 3; Pasal 11 huruf b; Pasal 12 ayat (1) huruf a;                                |                                                                                                                                                                                                                                                                                                                                                                                                                                                                                                        |                                                                                                                   |                   |

| No. | Undang-Undang | Posisi Kasus                                                                                                                                                                                                                                                                                                                                                                                                                                                                                                                                                                                                                                                                                                                                                                                                                             | Bagian yang diuji                                                                                                                                                                             | Ratio Decidendi<br>(Pertimbangan Hakim) | Putusan | Implikasi Yuridis |
|-----|---------------|------------------------------------------------------------------------------------------------------------------------------------------------------------------------------------------------------------------------------------------------------------------------------------------------------------------------------------------------------------------------------------------------------------------------------------------------------------------------------------------------------------------------------------------------------------------------------------------------------------------------------------------------------------------------------------------------------------------------------------------------------------------------------------------------------------------------------------------|-----------------------------------------------------------------------------------------------------------------------------------------------------------------------------------------------|-----------------------------------------|---------|-------------------|
|     |               | <p>Kekuasaan Kehakiman serta Menimbulkan Ketidakpastian Hukum dan Ketidakadilan, sehingga bertentangan dengan Pasal 24 ayat (1) dan (2), dan Pasal 28D ayat (1) UUD 1945.</p> <ul style="list-style-type: none"> <li>• Pasal 40 UU KPK Melanggar Prinsip Persamaan di Muka Hukum dan Kepastian Hukum, serta Bersifat Diskriminatif, Sehingga bertentangan Dengan Pasal 1 ayat (3), Pasal 27 ayat (1), Pasal 28D ayat (1) dan Pasal 28I ayat (2) UUD 1945.</li> <li>• Pasal 12 ayat (1) huruf a UU KPK Melanggar Hak Warga Negara atas Rasa Aman dan Jaminan Perlindungan dan Kepastian Hukum, Sehingga Bertentangan dengan Pasal 28D ayat (1) dan Pasal 28G ayat (1) UUD 1945</li> <li>• Pasal 11 huruf b UU KPK Menimbulkan Ketidakpastian Hukum dan Ketidakadilan, Sehingga Bertentangan dengan Pasal 28D ayat (1) UUD 1945</li> </ul> | <p>Pasal 20; Pasal 40; dan, Pasal 53 UU KPK.</p> <p>BERTENTANGAN dengan Pasal 1 ayat (3); Pasal 24 ayat (1), (2); Pasal 27 ayat (1); Pasal 28D ayat (1). Dan Pasal 28I ayat (2) UUD 1945.</p> |                                         |         |                   |
|     |               | <p><i>Keenam,</i><br/> <b>Perkara Nomor 019/PUU-II/2006</b><br/>           Pemohon: <b>Capt. Tarcisius Walla</b><br/>           Pemohon yang telah divonis</p>                                                                                                                                                                                                                                                                                                                                                                                                                                                                                                                                                                                                                                                                           | <p>Pasal 72 UU KPK, bertentangan dengan Pasal</p>                                                                                                                                             |                                         |         |                   |

| No. | Undang-Undang | Posisi Kasus                                                                                                                                                                                                                                                                                                                    | Bagian yang diuji      | <i>Ratio Decidendi</i><br>(Pertimbangan Hakim)                                                                                                                                                                                                                     | Putusan                                      | Implikasi Yuridis |
|-----|---------------|---------------------------------------------------------------------------------------------------------------------------------------------------------------------------------------------------------------------------------------------------------------------------------------------------------------------------------|------------------------|--------------------------------------------------------------------------------------------------------------------------------------------------------------------------------------------------------------------------------------------------------------------|----------------------------------------------|-------------------|
|     |               | berdasarkan Putusan Mahkamah Agung RI No. 1557 K/PID/2005. Padahal <i>tempus delicti</i> perbuatan dilakukan sebelum berlakunya Undang-undang Nomor 30 Tahun 2002.                                                                                                                                                              | 28 d ayat (1) UUD 1945 |                                                                                                                                                                                                                                                                    |                                              |                   |
|     |               | <i>Ketujuh,</i><br><b>Perkara Nomor 19/PUU-V/2007</b><br>Pemohon: <b>Ravavi Wilson</b><br>Tanggal Surat Permohonan 18 Juni 2007. Pemohon mendalilkan Pasal 29 UU <i>a quo</i> dapat menimbulkan diskriminasi hukum serta membuat keragu-raguan hukum atas kemampuan seseorang yang ingin mencalonkan diri menjadi pemimpin KPK. | Pasal 29 UU KPK        | Permohonan Pemohon dalam Pengujian Undang-Undang Nomor 30 Tahun 2002 tentang Komisi Pemberantasan Tindak Pidana Korupsi belum menerangkan secara rinci dan jelas pasal atau ayat, dan/atau bagian undang-undang yang menjadi norma untuk diuji dan norma UUD 1945. | Permohonan Pemohon ditolak untuk seluruhnya; |                   |

Sumber: Dokumen Indonesia Corruption Watch (ICW)

Lampiran 14  
Tingkat Pemenuhan Bab III UNCAC dalam Hukum Indonesia

| No. | UNCAC                             |      | Sifat Pengaturan                   |                            |                             |                          | Rekomendasi<br>GAP Analysis<br>KPK               | Analisis<br>Tambahan                                                                                                                                                                                                                                                                                                                                                                                                                                                                                                                        | Realisasi & Rekomendasi<br>untuk Hukum Indonesia                                                                                                                                                                                                                                                                                                                                                                                                                                                                                                                                                                                                                                                               |
|-----|-----------------------------------|------|------------------------------------|----------------------------|-----------------------------|--------------------------|--------------------------------------------------|---------------------------------------------------------------------------------------------------------------------------------------------------------------------------------------------------------------------------------------------------------------------------------------------------------------------------------------------------------------------------------------------------------------------------------------------------------------------------------------------------------------------------------------------|----------------------------------------------------------------------------------------------------------------------------------------------------------------------------------------------------------------------------------------------------------------------------------------------------------------------------------------------------------------------------------------------------------------------------------------------------------------------------------------------------------------------------------------------------------------------------------------------------------------------------------------------------------------------------------------------------------------|
|     | Pasal                             | Ayat | Wajib<br>Menerapkan/<br>mengadopsi | Wajib<br>Berusaha<br>Keras | Wajib<br>Memper-<br>timbang | Dapat Jika<br>Dibutuhkan |                                                  |                                                                                                                                                                                                                                                                                                                                                                                                                                                                                                                                             |                                                                                                                                                                                                                                                                                                                                                                                                                                                                                                                                                                                                                                                                                                                |
| 1   | Pasal 15                          |      | √                                  |                            |                             |                          | Penambahan unsur "menawarkan" pada revisi UU TPK | <ul style="list-style-type: none"> <li>▪ Sangat berhubungan dengan terminologi "Pejabat Publik" seperti diatur pada Pasal 2 butir (a) UNCAC.</li> <li>▪ Hukum Indonesia yang ada tidak memenuhi unsur pejabat publik seperti yang diinginkan UNCAC.</li> <li>▪ Sifat "wajib mengadopsi (<i>shall adopt</i>)" pengaturan Pasal 15 berarti sekaligus menegaskan bahwa pengaturan terminologi "pejabat publik" di hukum negara pihak minimal telah memenuhi Pasal 2 butir (a) UNCAC.</li> <li>▪ Pasal 15 butir (b) juga menambahkan</li> </ul> | <ul style="list-style-type: none"> <li>▪ Diatur pada Pasal 5 ayat (1), (2); Pasal 6 ayat (1), (2); Pasal 11, Pasal 12, Pasal 13 UU TPK.</li> <li>▪ Defenisi "Pejabat Publik" diatur pada: Pasal 1 butir (1) UU 8/1974 sebagaimana diubah oleh UU 43/1999 tentang Pokok-Pokok Kepegawaian.</li> <li>▪ Draft RUU TIPIKOR versi masyarakat dinilai lebih maju meskipun masih kurang mengadopsi unsur "fungsi publik &amp; pelayanan publik" seperti diatur pada Pasal 2 butir (a) angka (ii) &amp; (iii) UNCAC.</li> <li>▪ Draft RUU TIPIKOR versi masyarakat belum mengadopsi unsur "permohonan" seperti diamanatkan Pasal 15 butir (b) UNCAC.</li> <li>▪ REKOMENDASI: <b>SANGAT PENTING DIADOPSI</b></li> </ul> |
|     | Penyuapan pejabat publik nasional |      |                                    |                            |                             |                          |                                                  |                                                                                                                                                                                                                                                                                                                                                                                                                                                                                                                                             |                                                                                                                                                                                                                                                                                                                                                                                                                                                                                                                                                                                                                                                                                                                |



| No. | UNCAC                                                                                    |      | Sifat Pengaturan                   |                            |                                |                          | Rekomendasi<br>GAP Analysis<br>KPK                                    | Analisis<br>Tambahan                                                                                                                                                                                                                                                                                                                                                                                                           | Realisasi & Rekomendasi<br>untuk Hukum Indonesia                                                                                                                                                                                                                                                                                                                                             |
|-----|------------------------------------------------------------------------------------------|------|------------------------------------|----------------------------|--------------------------------|--------------------------|-----------------------------------------------------------------------|--------------------------------------------------------------------------------------------------------------------------------------------------------------------------------------------------------------------------------------------------------------------------------------------------------------------------------------------------------------------------------------------------------------------------------|----------------------------------------------------------------------------------------------------------------------------------------------------------------------------------------------------------------------------------------------------------------------------------------------------------------------------------------------------------------------------------------------|
|     | Pasal                                                                                    | Ayat | Wajib<br>Menerapkan/<br>mengadopsi | Wajib<br>Berusaha<br>Keras | Wajib<br>Memper-<br>timbangkan | Dapat Jika<br>Dibutuhkan |                                                                       |                                                                                                                                                                                                                                                                                                                                                                                                                                |                                                                                                                                                                                                                                                                                                                                                                                              |
|     |                                                                                          |      |                                    |                            |                                |                          |                                                                       | unsur "permohonan" yang dilakukan pejabat publik nasional.                                                                                                                                                                                                                                                                                                                                                                     |                                                                                                                                                                                                                                                                                                                                                                                              |
| 2   | Pasal 16                                                                                 | 1    | √                                  |                            |                                |                          | Perlu diatur pada UU TPK                                              | Hal ini juga berhubungan dengan penegasan defenisi "Pejabat Publik Asing" jika akan diatur pada Hukum Indonesia.                                                                                                                                                                                                                                                                                                               | Belum diatur pada Hukum Indonesia. RUU TIPIKOR inisiatif masyarakat telah mengadopsi pada Pasal 1 butir (5), Pasal 6 dan 11.                                                                                                                                                                                                                                                                 |
|     | Penyuapan pejabat publik asing                                                           | 2    |                                    |                            | √                              |                          |                                                                       |                                                                                                                                                                                                                                                                                                                                                                                                                                |                                                                                                                                                                                                                                                                                                                                                                                              |
| 3   | Pasal 17                                                                                 |      | √                                  |                            |                                |                          | Mempertahankan ketentuan yang telah ada dalam UU TPK (Pasal 8, 9, 10) | <ul style="list-style-type: none"> <li>▪ Dari perspektif objek, peraturan Indonesia mempunyai rumusan yang lebih luas.</li> <li>▪ Namun, penting dicermati unsur "pengalihan kekayaan dengan cara lain untuk keuntungan diri sendiri/orang lain".</li> <li>▪ Pada Konvensi, "pengalihan kekayaan" ini dikelompokkan sama pada perbuatan "penggelapan", dan harus diaopsi negara pihak sebagai sebuah tindak pidana.</li> </ul> | <ul style="list-style-type: none"> <li>▪ UU TPK belum mengatur sebagai tindak pidana sebuah "Pengalihan Kekayaan yang menguntungkan diri sendiri atau orang lain".</li> <li>▪ Hukum Indonesia harus mengatur "pengalihan kekayaan" tersebut sebagai Tindak Pidana.</li> <li>▪ Mengenai defenisi "Kekayaan" RUU TIPIKOR inisiatif masyarakat mengadopsinya pada Pasal 1 butir (8).</li> </ul> |
|     | Penggelapan, penyelewengan atau pengalihan kekayaan dengan cara lain oleh pejabat publik |      |                                    |                            |                                |                          |                                                                       |                                                                                                                                                                                                                                                                                                                                                                                                                                |                                                                                                                                                                                                                                                                                                                                                                                              |

| No. | UNCAC                    |      | Sifat Pengaturan                   |                            |                                |                          | Rekomendasi<br>GAP Analisis<br>KPK                                                                                                                                                                                                                             | Analisis<br>Tambahan                                                                                                                                                                                                                                                                                                                                                                                                                                                                                                                           | Realisasi & Rekomendasi<br>untuk Hukum Indonesia                                                                                                                                                                                                                                                                                                                                                                                                                                                                                                                                                                                                                                                                                              |
|-----|--------------------------|------|------------------------------------|----------------------------|--------------------------------|--------------------------|----------------------------------------------------------------------------------------------------------------------------------------------------------------------------------------------------------------------------------------------------------------|------------------------------------------------------------------------------------------------------------------------------------------------------------------------------------------------------------------------------------------------------------------------------------------------------------------------------------------------------------------------------------------------------------------------------------------------------------------------------------------------------------------------------------------------|-----------------------------------------------------------------------------------------------------------------------------------------------------------------------------------------------------------------------------------------------------------------------------------------------------------------------------------------------------------------------------------------------------------------------------------------------------------------------------------------------------------------------------------------------------------------------------------------------------------------------------------------------------------------------------------------------------------------------------------------------|
|     | Pasal                    | Ayat | Wajib<br>Menerapkan/<br>mengadopsi | Wajib<br>Berusaha<br>Keras | Wajib<br>Memper-<br>timbangkan | Dapat Jika<br>Dibutuhkan |                                                                                                                                                                                                                                                                |                                                                                                                                                                                                                                                                                                                                                                                                                                                                                                                                                |                                                                                                                                                                                                                                                                                                                                                                                                                                                                                                                                                                                                                                                                                                                                               |
|     |                          |      |                                    |                            |                                |                          |                                                                                                                                                                                                                                                                | ▪ Defenisi "Kekayaan" juga belum diatur pada UU TPK                                                                                                                                                                                                                                                                                                                                                                                                                                                                                            |                                                                                                                                                                                                                                                                                                                                                                                                                                                                                                                                                                                                                                                                                                                                               |
| 4   | Pasal 18                 |      |                                    |                            | √                              |                          | <ul style="list-style-type: none"> <li>▪ Sulit mencari padanan "memperdagangkan pengaruh"</li> <li>▪ Namun, dinilai bermaksud sama dengan Pasal 3 UU TPK.</li> <li>▪ Istilah "suatu keuntungan yang tidak semestinya" dimasukkan pada revisi UU TPK</li> </ul> | <ul style="list-style-type: none"> <li>▪ Sepertihalnya Pasal 15 diatas, Pasal 18 juga membagi perbuatan menjadi "aktif" dan "pasif". Butir (a) mencoba menjerat pelaku yang menjanjikan, menawarkan atau memberikan kepada pejabat publik. Sedangkan, Butir (b) mencoba menjerat pejabat publik.</li> <li>▪ Unsur "keuntungan yang tidak semestinya" juga diperhatikan. Hal ini diberikan agar pejabat publik menggunakan pengaruhnya yang nyata.</li> <li>▪ Pengaruh itu pun dimaksudkan agar si pelaku memperoleh keuntungan dari</li> </ul> | <ul style="list-style-type: none"> <li>▪ Pasal 3 UU TPK hanya menekankan pada aspek "penyalahgunaan kewenangan" yang berakibat pada "kerugian negara".</li> <li>▪ Perlu diatur pada revisi UU TPK agar, perbuatan seseorang yang menjanjikan, menawarkan atau memberikan sesuatu dengan maksud mempengaruhi kebijakan/otoritas pejabat agar memperoleh keuntungan yang tidak wajar dikategorikan sebagai tindak pidana.</li> <li>▪ Seharusnya pasal tersebut tidak perlu mensyaratkan kerugian negara.</li> <li>▪ Penting dipertimbangkan penyusunan secara serius, karena pasal ini sangat dapat berhubungan dengan klasifikasi <i>State Capture Corruption</i>. Karena otoritas publik atau adminitratif pejabat negara berusaha</li> </ul> |
|     | Memperdagangkan pengaruh |      |                                    |                            |                                |                          |                                                                                                                                                                                                                                                                |                                                                                                                                                                                                                                                                                                                                                                                                                                                                                                                                                |                                                                                                                                                                                                                                                                                                                                                                                                                                                                                                                                                                                                                                                                                                                                               |

| No. | UNCAC                       |      | Sifat Pengaturan                   |                            |                                |                          | Rekomendasi<br>GAP Analysis<br>KPK                                                                              | Analisis<br>Tambahan                                                                                                                                                                                     | Realisasi & Rekomendasi<br>untuk Hukum Indonesia                                                                                                                                                                                                                                  |
|-----|-----------------------------|------|------------------------------------|----------------------------|--------------------------------|--------------------------|-----------------------------------------------------------------------------------------------------------------|----------------------------------------------------------------------------------------------------------------------------------------------------------------------------------------------------------|-----------------------------------------------------------------------------------------------------------------------------------------------------------------------------------------------------------------------------------------------------------------------------------|
|     | Pasal                       | Ayat | Wajib<br>Menerapkan/<br>mengadopsi | Wajib<br>Berusaha<br>Keras | Wajib<br>Memper-<br>timbangkan | Dapat Jika<br>Dibutuhkan |                                                                                                                 |                                                                                                                                                                                                          |                                                                                                                                                                                                                                                                                   |
|     |                             |      |                                    |                            |                                |                          |                                                                                                                 | otoritas publik/administratif si pejabat.<br>▪ Pasal ini sama sekali tidak membicarakan kerugian negara.                                                                                                 | dipengaruhi dengan maksud memperoleh keuntungan tertentu.                                                                                                                                                                                                                         |
| 5   | Pasal 19                    |      |                                    |                            | √                              |                          | Mempertahankan<br>Pasal 2 UU TPK                                                                                | Unsur Pasal 19 ditekankan pada: sengaja, penyalahgunaan fungsi, & maksud untuk memperoleh keuntungan yang tidak semestinya. TIDAK MENSYARATKAN KERUGIAN KEUANGAN NEGARA seperti yang diatur pada Pasal 2 | Rumusan Pasal 2 dapat dipertahankan pada revisi UU TPK, akan tetapi penting dipertimbangkan agar kejahatan “penyalahgunaan fungsi” tersebut tidak harus mengakibatkan/berkorelasi dengan unsur “Kerugian Keuangan Negara”.                                                        |
|     | Penyalahgunaan Fungsi       |      |                                    |                            |                                |                          |                                                                                                                 |                                                                                                                                                                                                          |                                                                                                                                                                                                                                                                                   |
| 6   | Pasal 20                    |      |                                    |                            | √                              |                          | ▪ Selaras dengan Pasal 2 UU TPK.<br>▪ Sangat diperlukan sebagai kelanjutan wajib lapor kekayaan pejabat publik. | ▪ Pasal ini dapat juga berhubungan dengan kewajiban pembuktian terbalik oleh pejabat tentang kenaikan aset yang tidak masuk akal dibanding pendapatan yang sah.<br>▪ Artinya, Pasal 20 Konvensi lebih    | ▪ Rumusan Pasal 2 UU TPK tidak dapat dikatakan cukup selaras dengan substansi yang dikehendaki Pasal 20 Konvensi.<br>▪ Pasal 37A UU TPK telah mengatur sebagian substansi. Namun revisi UU TPK disarankan mempertimbangkannya untuk ditetapkan sebagai “kejahatan/tindak pidana”. |
|     | Memperkaya Secara Tidak Sah |      |                                    |                            |                                |                          |                                                                                                                 |                                                                                                                                                                                                          |                                                                                                                                                                                                                                                                                   |

| No. | UNCAC                      |      | Sifat Pengaturan                   |                            |                                |                          | Rekomendasi<br>GAP Analysis<br>KPK                       | Analisis<br>Tambahan                                                                                                                                                                                                                                                                                                                                                                                                                                                                                                 | Realisasi & Rekomendasi<br>untuk Hukum Indonesia |
|-----|----------------------------|------|------------------------------------|----------------------------|--------------------------------|--------------------------|----------------------------------------------------------|----------------------------------------------------------------------------------------------------------------------------------------------------------------------------------------------------------------------------------------------------------------------------------------------------------------------------------------------------------------------------------------------------------------------------------------------------------------------------------------------------------------------|--------------------------------------------------|
|     | Pasal                      | Ayat | Wajib<br>Menerapkan/<br>mengadopsi | Wajib<br>Berusaha<br>Keras | Wajib<br>Memper-<br>timbangkan | Dapat Jika<br>Dibutuhkan |                                                          |                                                                                                                                                                                                                                                                                                                                                                                                                                                                                                                      |                                                  |
|     |                            |      |                                    |                            |                                |                          |                                                          | ditekankan pada "keadaan aset", bukan proses pemerolehan aset dengan cara melawan hukum seperti diatur pada Pasal 2 UU TPK.<br><ul style="list-style-type: none"> <li>▪ Pasal 37A UU TPK mengatur tentang kewajiban terdakwa membuktikan kekayaan yang tidak seimbang dengan penghasilannya.</li> <li>▪ Akan tetapi, Pasal 37A cenderung hanya berkekuatan sebagai salah satu keterangan yang memperkuat alat bukti, bukan dianggap sebagai kejahatan tersendiri seperti yang diatur pada Pasal 20 UNCAC.</li> </ul> |                                                  |
| 7   | Pasal 21                   |      |                                    |                            | √                              |                          | Belum ditemukan pada UU TPK. Ketentuan ini perlu diatur. | Perlu diatur pada Hukum Indonesia                                                                                                                                                                                                                                                                                                                                                                                                                                                                                    | Belum terdapat dalam Hukum Indonesia             |
|     | Penyuapan di Sektor Swasta |      |                                    |                            |                                |                          |                                                          |                                                                                                                                                                                                                                                                                                                                                                                                                                                                                                                      |                                                  |
| 8   | Pasal 22                   |      |                                    |                            | √                              |                          | Belum ditemukan                                          | <i>Idem</i>                                                                                                                                                                                                                                                                                                                                                                                                                                                                                                          | <i>idem</i>                                      |

| No. | UNCAC                                                   |      | Sifat Pengaturan                   |                            |                                |                          | Rekomendasi<br>GAP Analysis<br>KPK                                                                                                                                                                                               | Analisis<br>Tambahan                                                                                                                                                                                                                                 | Realisasi & Rekomendasi<br>untuk Hukum Indonesia                                                                                                                                                                                                                                                        |
|-----|---------------------------------------------------------|------|------------------------------------|----------------------------|--------------------------------|--------------------------|----------------------------------------------------------------------------------------------------------------------------------------------------------------------------------------------------------------------------------|------------------------------------------------------------------------------------------------------------------------------------------------------------------------------------------------------------------------------------------------------|---------------------------------------------------------------------------------------------------------------------------------------------------------------------------------------------------------------------------------------------------------------------------------------------------------|
|     | Pasal                                                   | Ayat | Wajib<br>Menerapkan/<br>mengadopsi | Wajib<br>Berusaha<br>Keras | Wajib<br>Memper-<br>timbangkan | Dapat Jika<br>Dibutuhkan |                                                                                                                                                                                                                                  |                                                                                                                                                                                                                                                      |                                                                                                                                                                                                                                                                                                         |
|     | Penggelapan<br>Kekayaan dalam<br>Sektor Swasta          |      |                                    |                            |                                |                          | pada UU TPK.<br>Ketentuan ini perlu<br>diatur.                                                                                                                                                                                   |                                                                                                                                                                                                                                                      |                                                                                                                                                                                                                                                                                                         |
| 9   | Pasal 23                                                |      | √                                  |                            |                                |                          | <ul style="list-style-type: none"> <li>Telah diatur pada UU 15/2002 jo UU 25/2003 tentang Tindak Pidana Pencucian Uang</li> <li>Beberapa Pasal (Pasal 2 (1), (2); 3 (1), (2) dan 6 (1) dimasukkan dalam revisi UU TPK</li> </ul> | Jika telah diatur pada UU TPPU, seharusnya tidak perlu lagi diatur pada UU TPK. Rekomendasi UNCAC, khususnya Pasal 23 sebenarnya tidak bermaksud agar semua hal yang disebutkan harus diatur pada satu UU Korupsi. Tetapi dapat diatur pada UU lain. | <ul style="list-style-type: none"> <li>Tidak diatur pada UU TPK</li> <li>Telah diatur pada UU 15/2002 jo UU 25/2003 tentang Tindak Pidana Pencucian Uang</li> </ul>                                                                                                                                     |
|     | Pencucian Hasil<br>Kejahatan                            |      |                                    |                            |                                |                          |                                                                                                                                                                                                                                  |                                                                                                                                                                                                                                                      |                                                                                                                                                                                                                                                                                                         |
| 10  | Pasal 24                                                |      |                                    |                            | √                              |                          | Beberapa pasal dalam UU TPPU dimasukkan dalam revisi UU TPK                                                                                                                                                                      | <i>Idem</i>                                                                                                                                                                                                                                          | Substansinya telah diatur pada Pasal 6 ayat (1) UU 15/2002 jo UU 25/2003 tentang Tindak Pidana Pencucian Uang                                                                                                                                                                                           |
|     | Penyembunyian                                           |      |                                    |                            |                                |                          |                                                                                                                                                                                                                                  |                                                                                                                                                                                                                                                      |                                                                                                                                                                                                                                                                                                         |
| 11  | Pasal 25                                                |      | √                                  |                            |                                |                          | Tetap dipertahankan dlm UU TPK. Juga Berhubungan dengan UU PSK                                                                                                                                                                   | <ul style="list-style-type: none"> <li>Berhubungan dengan konsep perlindungan saksi.</li> <li>Pasal 21 UU TPK dinilai tidak mencakup pengaturan yang berhubungan dengan ancaman dan intimidasi yang</li> </ul>                                       | <ul style="list-style-type: none"> <li>Telah diatur pada Pasal 21 UU TPK.</li> <li>Telah diatur pada Pasal 5 ayat (1) butir a dan Pasal 10 UU No. 13 Tahun 2006 tentang Perlindungan Saksi dan Korban.</li> <li>Substansi Pasal 25 butir (b) belum diatur secara tegas dan khusus pada Hukum</li> </ul> |
|     | Perbuatan<br>Menghalang-<br>halangi Proses<br>Peradilan |      |                                    |                            |                                |                          |                                                                                                                                                                                                                                  |                                                                                                                                                                                                                                                      |                                                                                                                                                                                                                                                                                                         |

| No. | UNCAC                                                         |      | Sifat Pengaturan                   |                            |                                |                          | Rekomendasi<br>GAP Analysis<br>KPK                                                                                                                                                   | Analisis<br>Tambahan                                                                                                                  | Realisasi & Rekomendasi<br>untuk Hukum Indonesia                                                                                                |
|-----|---------------------------------------------------------------|------|------------------------------------|----------------------------|--------------------------------|--------------------------|--------------------------------------------------------------------------------------------------------------------------------------------------------------------------------------|---------------------------------------------------------------------------------------------------------------------------------------|-------------------------------------------------------------------------------------------------------------------------------------------------|
|     | Pasal                                                         | Ayat | Wajib<br>Menerapkan/<br>mengadopsi | Wajib<br>Berusaha<br>Keras | Wajib<br>Memper-<br>timbangkan | Dapat Jika<br>Dibutuhkan |                                                                                                                                                                                      |                                                                                                                                       |                                                                                                                                                 |
|     |                                                               |      |                                    |                            |                                |                          |                                                                                                                                                                                      | dilakukan terhaap Hakim dan Penegak Hukum pada kasus korupsi.                                                                         | Indonesia.                                                                                                                                      |
| 12  | Pasal 26                                                      |      | √                                  |                            |                                |                          | Berhubungan dengan pertanggungjawaban korporasi. Harus ada ketentuan yang lebih jelas dan tegas.                                                                                     | TIDAK DIPILIH SEBAGAI BAGIAN YANG DITELITI SECARA KHUSUS PADA PENYUSUNAN LAPORAN INDEPENDEN                                           |                                                                                                                                                 |
|     | Tanggungjawab Badan-Badan Hukum                               |      |                                    |                            |                                |                          |                                                                                                                                                                                      |                                                                                                                                       |                                                                                                                                                 |
| 13  | Pasal 27                                                      | 1    | √                                  |                            |                                |                          | <ul style="list-style-type: none"> <li>Tunduk pada Pasal 55 &amp; 56 KUHP, namun dapat diatur khusus berdasarkan Pasal 103 KUHP.</li> <li>Tetap dipertahankan pada UU TPK</li> </ul> | Pada delik korupsi, percobaan, pembantuan, atau permufakatan jahat dipidana dengan pidana yang sama dengan Pasal 2,3,5 s.d 14 UU TPK. | Telah diatur pada Pasal 15, khususnya tindak pidana yang diatur dalam pasal 2,3,5 s.d 14 UU TPK.                                                |
|     | Penyertaan dan Percobaan                                      | 2, 3 |                                    |                            |                                | √                        |                                                                                                                                                                                      |                                                                                                                                       |                                                                                                                                                 |
| 14  | Pasal 28                                                      |      |                                    |                            |                                |                          | Diperlukan pengaturan dalam revisi UU TPK                                                                                                                                            |                                                                                                                                       | Belum diatur pada Hukum Indonesia.                                                                                                              |
|     | Unsur Mengetahui, Niat dan Tujuan sebagai Unsur Tindak Pidana |      |                                    |                            |                                |                          |                                                                                                                                                                                      |                                                                                                                                       |                                                                                                                                                 |
| 15  | Pasal 29                                                      |      |                                    |                            |                                | √                        | <ul style="list-style-type: none"> <li>Mengikuti ketentuan Pasal 78 &amp; 79 KUHP.</li> <li>Sebaiknya ditegaskan bahwa "Tidak ada daluarsa</li> </ul>                                | Sepanjang tidak diatur secara khusus, maka Daluarsa tunduk pada Bab VIII KUHP tentang Hapusnya                                        | Telah diatur pada Bab VIII KUHP, tetapi direkomendasikan agar revisi UU TPK menegaskan ketentuan tentang Daluarsa, tepatnya "tidak ada daluarsa |
|     | Daluarsa                                                      |      |                                    |                            |                                |                          |                                                                                                                                                                                      |                                                                                                                                       |                                                                                                                                                 |

| No. | UNCAC                          |            | Sifat Pengaturan                   |                            |                                |                          | Rekomendasi<br>GAP Analysis<br>KPK                | Analisis<br>Tambahan                                                                                                                                                                                                                                                       | Realisasi & Rekomendasi<br>untuk Hukum Indonesia       |
|-----|--------------------------------|------------|------------------------------------|----------------------------|--------------------------------|--------------------------|---------------------------------------------------|----------------------------------------------------------------------------------------------------------------------------------------------------------------------------------------------------------------------------------------------------------------------------|--------------------------------------------------------|
|     | Pasal                          | Ayat       | Wajib<br>Menerapkan/<br>mengadopsi | Wajib<br>Berusaha<br>Keras | Wajib<br>Memper-<br>timbangkan | Dapat Jika<br>Dibutuhkan |                                                   |                                                                                                                                                                                                                                                                            |                                                        |
|     |                                |            |                                    |                            |                                |                          | dalam penuntutan dan pemidanaan untuk TPK"        | Kewenangan Menuntut Pidana dan Menjalankan Pidana (Pasal 76-85).<br>▪ Artinya, sebagian besar daluarsa penanganan kasus korupsi masih tunduk pada aturan umum. Padahal, harapannya sebagai sebuah <i>extra ordinary crime</i> , daluarsa kasus korupsi harus diatur lebih. | dalam penuntan dan pemidanaan untuk TPK:.              |
| 16  | Pasal 30                       | 1, 2, 4, 5 | √                                  |                            |                                |                          | Telah diatur dan harus dipertahankann pada UU TPK |                                                                                                                                                                                                                                                                            | Telah diatur dan harus dipertahankann pada UU TPK      |
|     | Penuntutan, Peradilan & Sanksi | 3          |                                    | √                          |                                |                          |                                                   |                                                                                                                                                                                                                                                                            |                                                        |
|     |                                | 6,7        |                                    |                            | √                              |                          |                                                   |                                                                                                                                                                                                                                                                            |                                                        |
| 17  | Pasal 31                       | 1, 2, 3, 7 | √                                  |                            |                                |                          | ▪ Telah diatur pada KUHP                          | ▪ Pengaturan pada Pasal 39 ayat (1)                                                                                                                                                                                                                                        | ▪ UU TPK mengatur pada Pasal 29 ayat (4), (5), 30, 37, |

| No. | UNCAC                                   |       | Sifat Pengaturan                   |                            |                                |                          | Rekomendasi<br>GAP Analysis<br>KPK                                                                                                                                            | Analisis<br>Tambahan                                                                                                                                                                                                                                                                                                                                                                                                                                                                                                                                                            | Realisasi & Rekomendasi<br>untuk Hukum Indonesia                                                                                                                                                                                                                                                                                                                                                                                                                  |
|-----|-----------------------------------------|-------|------------------------------------|----------------------------|--------------------------------|--------------------------|-------------------------------------------------------------------------------------------------------------------------------------------------------------------------------|---------------------------------------------------------------------------------------------------------------------------------------------------------------------------------------------------------------------------------------------------------------------------------------------------------------------------------------------------------------------------------------------------------------------------------------------------------------------------------------------------------------------------------------------------------------------------------|-------------------------------------------------------------------------------------------------------------------------------------------------------------------------------------------------------------------------------------------------------------------------------------------------------------------------------------------------------------------------------------------------------------------------------------------------------------------|
|     | Pasal                                   | Ayat  | Wajib<br>Menerapkan/<br>mengadopsi | Wajib<br>Berusaha<br>Keras | Wajib<br>Memper-<br>timbangkan | Dapat Jika<br>Dibutuhkan |                                                                                                                                                                               |                                                                                                                                                                                                                                                                                                                                                                                                                                                                                                                                                                                 |                                                                                                                                                                                                                                                                                                                                                                                                                                                                   |
|     | Pembekuan,<br>Perampasan &<br>Penyitaan | 4,5,6 |                                    |                            |                                | √                        | <ul style="list-style-type: none"> <li>Tidak diperlukan pengaturan tersendiri dalam UU TPK sepanjang tidak diperlukan alasan yang berbeda dengan UU 8/1981 (KUHP).</li> </ul> | <p>dan Pasal 46 KUHP dinilai masih sangat umum, terutama karena sulit menjangkau aliran uang melalui jasa perbankan yang sangat rumit dan cepat. Karena itu, lembaga seperti PPATK harus dimaksimalkan kewenangannya.</p> <ul style="list-style-type: none"> <li>Pasal ini harus dilihat berhubungan dengan Pasal 20 UNCAC. Terutama tentang rekomendasi untuk mengkriminalisasi perbuatan memperkaya diri secara tidak sah dengan indikator adanya peningkatan kekayaan yang tidak masuk akal dibanding pendapatan yang sah. Karena harta/kekayaan tersebut menjadi</li> </ul> | <p>37A, dan 38b.</p> <ul style="list-style-type: none"> <li>Berhubungan dengan Pasal 20 UNCAC, dalam hal perampasan oleh negara ketimpangan kekayaan terdakwa yang tidak dapat dibuktikan berasal dari pendapatan yang sah.</li> <li>Perlu diatur mekanisme &amp; kewenangan lembaga khusus (misal: PPATK) untuk membekukan rekening yang dicurigai berhubungan dengan TPK.</li> <li>Hal ini dirumuskan pada Pasal 15RUU TIPIKOR inisiatif masyarakat.</li> </ul> |
|     |                                         | 8     |                                    |                            | √                              |                          |                                                                                                                                                                               |                                                                                                                                                                                                                                                                                                                                                                                                                                                                                                                                                                                 |                                                                                                                                                                                                                                                                                                                                                                                                                                                                   |



| No. | UNCAC                                           |      | Sifat Pengaturan                   |                            |                                |                          | Rekomendasi<br>GAP Analysis<br>KPK                                        | Analisis<br>Tambahan                                                                                                                                                                                                                                                                 | Realisasi & Rekomendasi<br>untuk Hukum Indonesia                                                                |
|-----|-------------------------------------------------|------|------------------------------------|----------------------------|--------------------------------|--------------------------|---------------------------------------------------------------------------|--------------------------------------------------------------------------------------------------------------------------------------------------------------------------------------------------------------------------------------------------------------------------------------|-----------------------------------------------------------------------------------------------------------------|
|     | Pasal                                           | Ayat | Wajib<br>Menerapkan/<br>mengadopsi | Wajib<br>Berusaha<br>Keras | Wajib<br>Memper-<br>timbangkan | Dapat Jika<br>Dibutuhkan |                                                                           |                                                                                                                                                                                                                                                                                      |                                                                                                                 |
|     |                                                 |      |                                    |                            |                                |                          |                                                                           | objek yang dapat<br>dibekukan, disita<br>bahkan dirampas<br>negara jika si<br>terdakwa tidak dapat<br>membuktikan asal-<br>usul yang sah dari<br>kekayaannya.<br>▪ Perlu diatur<br>mekanisme<br>pengelolaan<br>kekayaan tersangka<br>atau terdakwa yang<br>berhubungan<br>dengan TPK |                                                                                                                 |
| 18  | Pasal 32                                        |      | √                                  |                            |                                |                          | Diperlukan<br>pengaturan khusus<br>tentang Perlindungan<br>saksi & korban | --                                                                                                                                                                                                                                                                                   | Telah ada UU 13/2006 tentang<br>Perlindungan Saksi Korban<br>(PSK) yang diterbitkan tanggal<br>11 Agustus 2006. |
|     | Perlindungan<br>saksi, saksi ahli<br>dan korban |      |                                    |                            |                                |                          |                                                                           |                                                                                                                                                                                                                                                                                      |                                                                                                                 |
| 19  | Pasal 33                                        |      |                                    |                            | √                              |                          | UU TPK sebatas<br>melindungi identitas<br>pelapor.                        | UU PSK tidak<br>memasukan pelapor<br>sebagai subjek yang<br>dilindungi.                                                                                                                                                                                                              |                                                                                                                 |
|     | Perlindungan bagi<br>Pelapor                    |      |                                    |                            |                                |                          |                                                                           |                                                                                                                                                                                                                                                                                      |                                                                                                                 |
| 20  | Pasal 34                                        |      | √                                  |                            |                                |                          | Tidak diatur pada UU                                                      | Dapat menjadi salah                                                                                                                                                                                                                                                                  |                                                                                                                 |

| No. | UNCAC                                   |      | Sifat Pengaturan                   |                            |                                |                          | Rekomendasi<br>GAP Analysis<br>KPK                                                                                                                          | Analisis<br>Tambahan                                                                                                                                                                                                                                                                                    | Realisasi & Rekomendasi<br>untuk Hukum Indonesia |
|-----|-----------------------------------------|------|------------------------------------|----------------------------|--------------------------------|--------------------------|-------------------------------------------------------------------------------------------------------------------------------------------------------------|---------------------------------------------------------------------------------------------------------------------------------------------------------------------------------------------------------------------------------------------------------------------------------------------------------|--------------------------------------------------|
|     | Pasal                                   | Ayat | Wajib<br>Menerapkan/<br>mengadopsi | Wajib<br>Berusaha<br>Keras | Wajib<br>Memper-<br>timbangkan | Dapat Jika<br>Dibutuhkan |                                                                                                                                                             |                                                                                                                                                                                                                                                                                                         |                                                  |
|     | Akibat-Akibat dari<br>Perbuatan Korupsi |      |                                    |                            |                                |                          | TPK. Perlu diatur<br>pada revisi UU TPK.                                                                                                                    | satu alasan<br>pembatalan<br>kontrak/perjanjian<br>yang dimuat dalam<br>rumusan kontrak.<br>Tetapi, pembatalan<br>kontrak sebaiknya<br>harus melihat pada<br>kepentingan yang<br>seimbang antara para<br>pihak.                                                                                         |                                                  |
| 21  | Pasal 35                                |      | √                                  |                            |                                |                          | Dinilai telah diatur<br>KUHP, Pasal 98-<br>101. Merupakan<br>perluasan makna<br>"kerugian" yang tidak<br>saja didasarkan pada<br>unsur "kerugian<br>negara" | Badan/pihak yang<br>merasa dirugikan<br>harus dijamin haknya<br>untuk melakukan<br>penuntutan tidak saja<br>dalam hal<br>"Penggabungan<br>Perakra Gugatan<br>ganti kerugian" seperti<br>diatur KUHP, tetapi<br>juga harus dipikirkan<br>kemungkinan<br>pengajuan gugatan<br>perdata secara<br>terpisah. |                                                  |
|     | Kompensasi untuk<br>Kerugian            |      |                                    |                            |                                |                          |                                                                                                                                                             |                                                                                                                                                                                                                                                                                                         |                                                  |
| 22  | Pasal 36                                |      | √                                  |                            |                                |                          | Telah ada KPK, akan<br>tetapi kalimat "wajib<br>diberi kebebasan<br>yang diperlukan..."                                                                     |                                                                                                                                                                                                                                                                                                         |                                                  |
|     | Wewenang-<br>wewenang khusus            |      |                                    |                            |                                |                          |                                                                                                                                                             |                                                                                                                                                                                                                                                                                                         |                                                  |

| No. | UNCAC                                     |      | Sifat Pengaturan                   |                            |                                |                          | Rekomendasi<br>GAP Analysis<br>KPK                                                                    | Analisis<br>Tambahan                                                                                                                                                                                                                              | Realisasi & Rekomendasi<br>untuk Hukum Indonesia |
|-----|-------------------------------------------|------|------------------------------------|----------------------------|--------------------------------|--------------------------|-------------------------------------------------------------------------------------------------------|---------------------------------------------------------------------------------------------------------------------------------------------------------------------------------------------------------------------------------------------------|--------------------------------------------------|
|     | Pasal                                     | Ayat | Wajib<br>Menerapkan/<br>mengadopsi | Wajib<br>Berusaha<br>Keras | Wajib<br>Memper-<br>timbangkan | Dapat Jika<br>Dibutuhkan |                                                                                                       |                                                                                                                                                                                                                                                   |                                                  |
|     |                                           |      |                                    |                            |                                |                          | harus ditelaah lebih jauh agar dapat diketahui apakah wewenang KPK telah memenuhi ketentuan tersebut. |                                                                                                                                                                                                                                                   |                                                  |
| 23  | Pasal 37                                  | 1    | √                                  |                            |                                |                          | Berhubungan dengan dasar hukum "saksi mahkota". Layak diatur dalam UU TPK.                            | Aturan ditekankan pada kemungkinan pemberian "kompensasi" bahkan "kekebalan penuntutan" terhadap pelaku yang berkerjasama dengan otoritas penegak hukum pada hal yang bersifat substantif. Juga sangat berhubungan dengan pengaturan pada UU PSK. |                                                  |
|     | Kerjasama dengan Otoritas Penegakan Hukum | 2, 3 |                                    |                            | √                              |                          |                                                                                                       |                                                                                                                                                                                                                                                   |                                                  |
|     |                                           | 5    |                                    |                            |                                | √                        |                                                                                                       |                                                                                                                                                                                                                                                   |                                                  |
| 24  | Pasal 38                                  |      | √                                  |                            |                                |                          | Kepolisian dan Kejaksaan tidak dipisah dalam membahas suatu kasus (seperti datur HIR)                 | Khusus dalam TPK, seharusnya diatur KPK diposisikan sebagai lembaga sentral untuk melakukan penyelidikan, penyidikan dan penuntutan. Patut ditegaskan bahwa penanganan kasus                                                                      |                                                  |
|     | Kerjasama antara Otoritas Nasional        |      |                                    |                            |                                |                          |                                                                                                       |                                                                                                                                                                                                                                                   |                                                  |

| No. | UNCAC                                                   |      | Sifat Pengaturan                   |                            |                                |                          | Rekomendasi<br>GAP Analysis<br>KPK | Analisis<br>Tambahan                                                                                                                                                                               | Realisasi & Rekomendasi<br>untuk Hukum Indonesia |
|-----|---------------------------------------------------------|------|------------------------------------|----------------------------|--------------------------------|--------------------------|------------------------------------|----------------------------------------------------------------------------------------------------------------------------------------------------------------------------------------------------|--------------------------------------------------|
|     | Pasal                                                   | Ayat | Wajib<br>Menerapkan/<br>mengadopsi | Wajib<br>Berusaha<br>Keras | Wajib<br>Memper-<br>timbangkan | Dapat Jika<br>Dibutuhkan |                                    |                                                                                                                                                                                                    |                                                  |
|     |                                                         |      |                                    |                            |                                |                          |                                    | korupsi berada di jalur khusus, termasuk peradilan yang punya kewenangan untuk itu, yakni TIPIKOR.                                                                                                 |                                                  |
| 25  | Pasal 39                                                | 1    | √                                  |                            |                                |                          | Telah diatur pada Bab V UU TPK     | Khusus tentang kerjasama dengan lembaga keuangan, pemberantasan korupsi masih terhalang dengan minimnya kewenangan PPATK terutama dalam hal pembekuan rekening yang diduga berhubungan dengan TPK. |                                                  |
|     | Kerjasama antara Otoritas Nasional dengan Sektor Swasta | 2    |                                    |                            | √                              |                          |                                    |                                                                                                                                                                                                    |                                                  |
| 26  | Pasal 40                                                |      | √                                  |                            |                                |                          | Sudah diatur pada Pasal 29 UU TPK. |                                                                                                                                                                                                    |                                                  |
|     | Kerahasiaan Bank                                        |      |                                    |                            |                                |                          |                                    |                                                                                                                                                                                                    |                                                  |
| 27  | Pasal 41                                                |      |                                    |                            |                                | √                        | Belum diatur di hukum Indonesia    | Catatan kriminal ini berguna sebagai salah satu alasan untuk membekukan rekening tersangka/terpidana di luar negeri yang diduga berhubungan dengan catatan kriminal yang telah diputus di suatu    | Belum diatur pada Hukum Indonesia.               |
|     | Catatan Kriminal                                        |      |                                    |                            |                                |                          |                                    |                                                                                                                                                                                                    |                                                  |

| No. | UNCAC      |       | Sifat Pengaturan                   |                            |                                |                          | Rekomendasi<br>GAP Analysis<br>KPK                                                                            | Analisis<br>Tambahan                                                                                                                 | Realisasi & Rekomendasi<br>untuk Hukum Indonesia |
|-----|------------|-------|------------------------------------|----------------------------|--------------------------------|--------------------------|---------------------------------------------------------------------------------------------------------------|--------------------------------------------------------------------------------------------------------------------------------------|--------------------------------------------------|
|     | Pasal      | Ayat  | Wajib<br>Menerapkan/<br>mengadopsi | Wajib<br>Berusaha<br>Keras | Wajib<br>Memper-<br>timbangkan | Dapat Jika<br>Dibutuhkan |                                                                                                               |                                                                                                                                      |                                                  |
|     |            |       |                                    |                            |                                |                          |                                                                                                               | negara. Misal: BNP Paribas dan catatn kriminal Tommy.                                                                                |                                                  |
| 28  | Pasal 42   | 1,3,5 | √                                  |                            |                                |                          | Telah diatur pada Pasal 2-9 KUHP (Asas teritorial, nasionalisme aktif, nasionalisme pasif dan asas universal) | S sepanjang tidak diatur khusus pada UU TPK, berlaku Buku ke-I KUHP sebagai aturan umum. Maka, tidak perlu diatur ulang pada UU TPK. |                                                  |
|     | Yurisdiksi | 2,4   |                                    |                            |                                | √                        |                                                                                                               |                                                                                                                                      |                                                  |

Sumber: Dokumen Indonesia Corruption Watch (ICW)
