# Supplementary material for: Democratization, leader education and growth: firm-level evidence from Indonesia
Source: Springer Nature journal article supplement (doi:10.1007/s10887-022-09221-5), 2023-02-15
Supplement: MOESM2 [file kabupaten codes 1993 - 2002.pdf › Data/kabupaten codes 1993 - 2002.pdf]

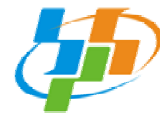

# Badan Pusat Statistik

## Master File Kabupaten 1993 - 2002

| ID290 | KAB290 (Des 1993) | ID291 | KAB291 (Des 1994) | ID292 | KAB292 (Des 1995) | ID294 | KAB294 (Des 1996) | ID301 | KAB301 (Des 1997) | ID341 | KAB341 (Des 1999) | ID354 | KAB354 (Des 2001) | ID391 | KAB391 (Des 2002)  |
|-------|-------------------|-------|-------------------|-------|-------------------|-------|-------------------|-------|-------------------|-------|-------------------|-------|-------------------|-------|--------------------|
| 8206  | SORONG            | 9103  | SORONG            | 9406  | SORONG            | 9406  | SORONG             |
| 8206  | SORONG            | 9103  | SORONG            | 9406  | SORONG            | 9422  | SORONG SELATAN     |
| 8206  | SORONG            | 9171  | KOTA SORONG       | 9472  | KOTA SORONG       | 9472  | KOTA SORONG        |
| 8200  | IRIAN JAYA        | 9300  | IRIAN JAYA TIMUR  | 9400  | PAPUA             | 9400  | PAPUA              |
| 8201  | MERAUKE           | 9301  | MERAUKE           | 9401  | MERAUKE           | 9401  | MERAUKE            |
| 8202  | JAYAWIJAYA        | 9302  | JAYAWIJAYA        | 9402  | JAYAWIJAYA        | 9402  | JAYAWIJAYA         |
| 8203  | JAYAPURA          | 9304  | JAYAPURA          | 9403  | JAYAPURA          | 9403  | JAYAPURA           |
| 8204  | PANIAI            | 8204  | PANIAI            | 8204  | PANIAI            | 8204  | PANIAI            | 8204  | NABIRE            | 9202  | NABIRE            | 9404  | NABIRE            | 9404  | NABIRE             |
| 8208  | YAPEN WAROPEN     | 9204  | YAPEN WAROPEN     | 9408  | YAPEN WAROPEN     | 9408  | YAPEN WAROPEN      |
| 8209  | BIAK NUMFOR       | 9205  | BIAK NUMFOR       | 9409  | BIAK NUMFOR       | 9409  | BIAK NUMFOR        |
| 8204  | PANIAI            | 8204  | PANIAI            | 8204  | PANIAI            | 8204  | PANIAI            | 8210  | ADM. PANIAI       | 9203  | PANIAI            | 9410  | PANIAI            | 9410  | PANIAI             |
| 8204  | PANIAI            | 8204  | PANIAI            | 8204  | PANIAI            | 8204  | PANIAI            | 8211  | PUNCAK JAYA       | 9303  | PUNCAK JAYA       | 9411  | PUNCAK JAYA       | 9411  | PUNCAK JAYA        |
| 8205  | FAK-FAK           | 8205  | FAK-FAK           | 8205  | FAK-FAK           | 8205  | FAK-FAK           | 8212  | ADM. MIMIKA       | 9201  | MIMIKA            | 9412  | MIMIKA            | 9412  | MIMIKA             |
| 8201  | MERAUKE           | 9301  | MERAUKE           | 9401  | MERAUKE           | 9413  | BOVEN DIGOEL       |
| 8201  | MERAUKE           | 9301  | MERAUKE           | 9401  | MERAUKE           | 9414  | MAPPI              |
| 8201  | MERAUKE           | 9301  | MERAUKE           | 9401  | MERAUKE           | 9415  | ASMAT              |
| 8202  | JAYAWIJAYA        | 9302  | JAYAWIJAYA        | 9402  | JAYAWIJAYA        | 9416  | YAHUKIMO           |
| 8202  | JAYAWIJAYA        | 9302  | JAYAWIJAYA        | 9402  | JAYAWIJAYA        | 9417  | PEGUNUNGAN BINTANG |
| 8202  | JAYAWIJAYA        | 9302  | JAYAWIJAYA        | 9402  | JAYAWIJAYA        | 9418  | TOLIKARA           |
| 8203  | JAYAPURA          | 9304  | JAYAPURA          | 9403  | JAYAPURA          | 9419  | SARMI              |
| 8203  | JAYAPURA          | 9304  | JAYAPURA          | 9403  | JAYAPURA          | 9420  | KEEROM             |
| 8208  | YAPEN WAROPEN     | 9204  | YAPEN WAROPEN     | 9408  | YAPEN WAROPEN     | 9426  | WAROPEN            |
| 8209  | BIAK NUMFOR       | 9205  | BIAK NUMFOR       | 9409  | BIAK NUMFOR       | 9409  | BIAK NUMFOR        |
| 8203  | JAYAPURA          | 9304  | JAYAPURA          | 9403  | JAYAPURA          | 9419  | SARMI              |
| 8202  | JAYAWIJAYA        | 9302  | JAYAWIJAYA        | 9402  | JAYAWIJAYA        | 9402  | JAYAWIJAYA         |
| 8202  | JAYAWIJAYA        | 9302  | JAYAWIJAYA        | 9402  | JAYAWIJAYA        | 9402  | JAYAWIJAYA         |
| 8202  | JAYAWIJAYA        | 9302  | JAYAWIJAYA        | 9402  | JAYAWIJAYA        | 9402  | JAYAWIJAYA         |
| 8202  | JAYAWIJAYA        | 9302  | JAYAWIJAYA        | 9402  | JAYAWIJAYA        | 9402  | JAYAWIJAYA         |
| 8204  | PANIAI            | 8204  | PANIAI            | 8204  | PANIAI            | 8204  | PANIAI            | 8211  | PUNCAK JAYA       | 9303  | PUNCAK JAYA       | 9411  | PUNCAK JAYA       | 9411  | PUNCAK JAYA        |
| 8204  | PANIAI            | 8204  | PANIAI            | 8204  | PANIAI            | 8204  | PANIAI            | 8204  | NABIRE            | 9202  | NABIRE            | 9404  | NABIRE            | 9404  | NABIRE             |
| 8204  | PANIAI            | 8204  | PANIAI            | 8204  | PANIAI            | 8204  | PANIAI            | 8210  | ADM. PANIAI       | 9203  | PANIAI            | 9410  | PANIAI            | 9410  | PANIAI             |
| 8204  | PANIAI            | 8204  | PANIAI            | 8204  | PANIAI            | 8204  | PANIAI            | 8210  | ADM. PANIAI       | 9203  | PANIAI            | 9410  | PANIAI            | 9410  | PANIAI             |
| 8271  | KOTA JAYAPURA     | 9371  | KOTA JAYAPURA     | 9471  | KOTA JAYAPURA     | 9471  | KOTA JAYAPURA      |
