# Supplementary material for: Democratization, leader education and growth: firm-level evidence from Indonesia
Source: Springer Nature journal article supplement (doi:10.1007/s10887-022-09221-5), 2023-02-15
Supplement: MOESM2 [file kabupaten codes 2003 - 2009.pdf › Data/kabupaten codes 2003 - 2009.pdf]

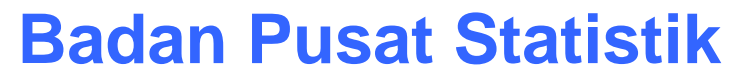**Master File Kabupaten 2003 - 2009**[illegible]

**Master File Kabupaten 2003 - 2009**[illegible]

**Master File Kabupaten 2003 - 2009**

| ID440 | KAB440 (Des 2003)         | ID456 | KAB456 (Juli 2007)        | ID465 | KAB465 (Des 2007)         | ID471 | KAB471 (Juli 2008)        | ID483 | KAB483 (Des 2008)         | ID493 | KAB493 (April 2009)       | ID495 | KAB495 (Juni 2009)        | ID497 | KAB497 (Agt 2009)         |
|-------|---------------------------|-------|---------------------------|-------|---------------------------|-------|---------------------------|-------|---------------------------|-------|---------------------------|-------|---------------------------|-------|---------------------------|
| 1808  | TULANGBAWANG              | 1810  | TULANGBAWANG BARAT        | 1812  | TULANGBAWANG BARAT        | 1812  | TULANGBAWANG BARAT        |
| 1871  | KOTA BANDAR LAMPUNG       |
| 1872  | KOTA METRO                |
| 1900  | KEPULAUAN BANGKA BELITUNG |
| 1901  | BANGKA                    |
| 1902  | BELITUNG                  |
| 1903  | BANGKA BARAT              |
| 1904  | BANGKA TENGAH             |
| 1905  | BANGKA SELATAN            |
| 1906  | BELITUNG TIMUR            |
| 1971  | KOTA PANGKAL PINANG       |
| 2100  | KEPULAUAN RIAU            |
| 2101  | KARIMUN                   |
| 2102  | KEPULAUAN RIAU            | 2102  | BINTAN                    |
| 2103  | NATUNA                    |
| 2104  | LINGGA                    |
| 2103  | NATUNA                    | 2103  | NATUNA                    | 2103  | NATUNA                    | 2103  | NATUNA                    | 2105  | KEPULAUAN ANAMBAS         |
| 2171  | KOTA BATAM                |
| 2172  | KOTA TANJUNG PINANG       |
| 3100  | DKI JAKARTA               |
| 3101  | KEPULAUAN SERIBU          |
| 3171  | KODYA JAKARTA SELATAN     |
| 3172  | KODYA JAKARTA TIMUR       |
| 3173  | KODYA JAKARTA PUSAT       |
| 3174  | KODYA JAKARTA BARAT       |
| 3175  | KODYA JAKARTA UTARA       |
| 3200  | JAWA BARAT                |
| 3201  | BOGOR                     |
| 3202  | SUKABUMI                  |
| 3203  | CIANJUR                   |
| 3204  | BANDUNG                   |
| 3205  | GARUT                     |
| 3206  | TASIKMALAYA               |
| 3207  | CIAMIS                    |
| 3208  | KUNINGAN                  |
| 3209  | CIREBON                   |
| 3210  | MAJALENGKA                |
| 3211  | SUMEDANG                  |
| 3212  | INDRAMAYU                 |
| 3213  | SUBANG                    |
| 3214  | PURWAKARTA                |
| 3215  | KARAWANG                  |
| 3216  | BEKASI                    |
| 3204  | BANDUNG                   | 3217  | BANDUNG BARAT             |
| 3271  | KOTA BOGOR                |
| 3272  | KOTA SUKABUMI             |
| 3273  | KOTA BANDUNG              |
| 3274  | KOTA CIREBON              |
| 3275  | KOTA BEKASI               |
| 3276  | KOTA DEPOK                |
| 3277  | CIMAHI                    | 3277  | KOTA CIMAHI               | 3277  | KOTA CIMAHI               | 3277  | KOTA CIMAHI               | 3277  | KOTA CIMAHI               | 3277  | KOTA CIMAHI               | 3277  | KOTA CIMAHI               | 3277  | KOTA CIMAHI               |
| 3278  | TASIKMALAYA               | 3278  | KOTA TASIKMALAYA          | 3278  | KOTA TASIKMALAYA          | 3278  | KOTA TASIKMALAYA          | 3278  | KOTA TASIKMALAYA          | 3278  | KOTA TASIKMALAYA          | 3278  | KOTA TASIKMALAYA          | 3278  | KOTA TASIKMALAYA          |
| 3279  | KOTA BANJAR               |
| 3300  | JAWA TENGAH               |
| 3301  | CILACAP                   |
| 3302  | BANYUMAS                  |
| 3303  | PURBALINGGA               |
| 3304  | BANJARNEGARA              |
| 3305  | KEBUMEN                   |
| 3306  | PURWOREJO                 |
| 3307  | WONOSOBO                  |
| 3308  | MAGELANG                  |
| 3309  | BOYOLALI                  |
| 3310  | KLATEN                    |
| 3311  | SUKOHARJO                 |
| 3312  | WONOGIRI                  |
| 3313  | KARANGANYAR               |
| 3314  | SRAGEN                    |
| 3315  | GROBOGAN                  |
| 3316  | BLORA                     |
| 3317  | REMBANG                   |

**Master File Kabupaten 2003 - 2009**

| ID440 | KAB440 (Des 2003) | ID456 | KAB456 (Juli 2007) | ID465 | KAB465 (Des 2007) | ID471 | KAB471 (Juli 2008) | ID483 | KAB483 (Des 2008) | ID493 | KAB493 (April 2009) | ID495 | KAB495 (Juni 2009) | ID497 | KAB497 (Agt 2009) |
|-------|-------------------|-------|--------------------|-------|-------------------|-------|--------------------|-------|-------------------|-------|---------------------|-------|--------------------|-------|-------------------|
| 3318  | PATI              | 3318  | PATI               | 3318  | PATI              | 3318  | PATI               | 3318  | PATI              | 3318  | PATI                | 3318  | PATI               | 3318  | PATI              |
| 3319  | KUDUS             | 3319  | KUDUS              | 3319  | KUDUS             | 3319  | KUDUS              | 3319  | KUDUS             | 3319  | KUDUS               | 3319  | KUDUS              | 3319  | KUDUS             |
| 3320  | JEPARA            | 3320  | JEPARA             | 3320  | JEPARA            | 3320  | JEPARA             | 3320  | JEPARA            | 3320  | JEPARA              | 3320  | JEPARA             | 3320  | JEPARA            |
| 3321  | DEMAK             | 3321  | DEMAK              | 3321  | DEMAK             | 3321  | DEMAK              | 3321  | DEMAK             | 3321  | DEMAK               | 3321  | DEMAK              | 3321  | DEMAK             |
| 3322  | SEMARANG          | 3322  | SEMARANG           | 3322  | SEMARANG          | 3322  | SEMARANG           | 3322  | SEMARANG          | 3322  | SEMARANG            | 3322  | SEMARANG           | 3322  | SEMARANG          |
| 3323  | TEMANGGUNG        | 3323  | TEMANGGUNG         | 3323  | TEMANGGUNG        | 3323  | TEMANGGUNG         | 3323  | TEMANGGUNG        | 3323  | TEMANGGUNG          | 3323  | TEMANGGUNG         | 3323  | TEMANGGUNG        |
| 3324  | KENDAL            | 3324  | KENDAL             | 3324  | KENDAL            | 3324  | KENDAL             | 3324  | KENDAL            | 3324  | KENDAL              | 3324  | KENDAL             | 3324  | KENDAL            |
| 3325  | BATANG            | 3325  | BATANG             | 3325  | BATANG            | 3325  | BATANG             | 3325  | BATANG            | 3325  | BATANG              | 3325  | BATANG             | 3325  | BATANG            |
| 3326  | PEKALONGAN        | 3326  | PEKALONGAN         | 3326  | PEKALONGAN        | 3326  | PEKALONGAN         | 3326  | PEKALONGAN        | 3326  | PEKALONGAN          | 3326  | PEKALONGAN         | 3326  | PEKALONGAN        |
| 3327  | PEMALANG          | 3327  | PEMALANG           | 3327  | PEMALANG          | 3327  | PEMALANG           | 3327  | PEMALANG          | 3327  | PEMALANG            | 3327  | PEMALANG           | 3327  | PEMALANG          |
| 3328  | TEGAL             | 3328  | TEGAL              | 3328  | TEGAL             | 3328  | TEGAL              | 3328  | TEGAL             | 3328  | TEGAL               | 3328  | TEGAL              | 3328  | TEGAL             |
| 3329  | BREBES            | 3329  | BREBES             | 3329  | BREBES            | 3329  | BREBES             | 3329  | BREBES            | 3329  | BREBES              | 3329  | BREBES             | 3329  | BREBES            |
| 3371  | KOTA MAGELANG     | 3371  | KOTA MAGELANG      | 3371  | KOTA MAGELANG     | 3371  | KOTA MAGELANG      | 3371  | KOTA MAGELANG     | 3371  | KOTA MAGELANG       | 3371  | KOTA MAGELANG      | 3371  | KOTA MAGELANG     |
| 3372  | KOTA SURAKARTA    | 3372  | KOTA SURAKARTA     | 3372  | KOTA SURAKARTA    | 3372  | KOTA SURAKARTA     | 3372  | KOTA SURAKARTA    | 3372  | KOTA SURAKARTA      | 3372  | KOTA SURAKARTA     | 3372  | KOTA SURAKARTA    |
| 3373  | KOTA SALATIGA     | 3373  | KOTA SALATIGA      | 3373  | KOTA SALATIGA     | 3373  | KOTA SALATIGA      | 3373  | KOTA SALATIGA     | 3373  | KOTA SALATIGA       | 3373  | KOTA SALATIGA      | 3373  | KOTA SALATIGA     |
| 3374  | KOTA SEMARANG     | 3374  | KOTA SEMARANG      | 3374  | KOTA SEMARANG     | 3374  | KOTA SEMARANG      | 3374  | KOTA SEMARANG     | 3374  | KOTA SEMARANG       | 3374  | KOTA SEMARANG      | 3374  | KOTA SEMARANG     |
| 3375  | KOTA PEKALONGAN   | 3375  | KOTA PEKALONGAN    | 3375  | KOTA PEKALONGAN   | 3375  | KOTA PEKALONGAN    | 3375  | KOTA PEKALONGAN   | 3375  | KOTA PEKALONGAN     | 3375  | KOTA PEKALONGAN    | 3375  | KOTA PEKALONGAN   |
| 3376  | KOTA TEGAL        | 3376  | KOTA TEGAL         | 3376  | KOTA TEGAL        | 3376  | KOTA TEGAL         | 3376  | KOTA TEGAL        | 3376  | KOTA TEGAL          | 3376  | KOTA TEGAL         | 3376  | KOTA TEGAL        |
| 3400  | D I YOGYAKARTA    | 3400  | D I YOGYAKARTA     | 3400  | D I YOGYAKARTA    | 3400  | D I YOGYAKARTA     | 3400  | D I YOGYAKARTA    | 3400  | D I YOGYAKARTA      | 3400  | D I YOGYAKARTA     | 3400  | D I YOGYAKARTA    |
| 3401  | KULON PROGO       | 3401  | KULON PROGO        | 3401  | KULON PROGO       | 3401  | KULON PROGO        | 3401  | KULON PROGO       | 3401  | KULON PROGO         | 3401  | KULON PROGO        | 3401  | KULON PROGO       |
| 3402  | BANTUL            | 3402  | BANTUL             | 3402  | BANTUL            | 3402  | BANTUL             | 3402  | BANTUL            | 3402  | BANTUL              | 3402  | BANTUL             | 3402  | BANTUL            |
| 3403  | GUNUNG KIDUL      | 3403  | GUNUNG KIDUL       | 3403  | GUNUNG KIDUL      | 3403  | GUNUNG KIDUL       | 3403  | GUNUNG KIDUL      | 3403  | GUNUNG KIDUL        | 3403  | GUNUNG KIDUL       | 3403  | GUNUNG KIDUL      |
| 3404  | SLEMAN            | 3404  | SLEMAN             | 3404  | SLEMAN            | 3404  | SLEMAN             | 3404  | SLEMAN            | 3404  | SLEMAN              | 3404  | SLEMAN             | 3404  | SLEMAN            |
| 3471  | KOTA YOGYAKARTA   | 3471  | KOTA YOGYAKARTA    | 3471  | KOTA YOGYAKARTA   | 3471  | KOTA YOGYAKARTA    | 3471  | KOTA YOGYAKARTA   | 3471  | KOTA YOGYAKARTA     | 3471  | KOTA YOGYAKARTA    | 3471  | KOTA YOGYAKARTA   |
| 3500  | JAWA TIMUR        | 3500  | JAWA TIMUR         | 3500  | JAWA TIMUR        | 3500  | JAWA TIMUR         | 3500  | JAWA TIMUR        | 3500  | JAWA TIMUR          | 3500  | JAWA TIMUR         | 3500  | JAWA TIMUR        |
| 3501  | PACITAN           | 3501  | PACITAN            | 3501  | PACITAN           | 3501  | PACITAN            | 3501  | PACITAN           | 3501  | PACITAN             | 3501  | PACITAN            | 3501  | PACITAN           |
| 3502  | PONOROGO          | 3502  | PONOROGO           | 3502  | PONOROGO          | 3502  | PONOROGO           | 3502  | PONOROGO          | 3502  | PONOROGO            | 3502  | PONOROGO           | 3502  | PONOROGO          |
| 3503  | TRENGGALEK        | 3503  | TRENGGALEK         | 3503  | TRENGGALEK        | 3503  | TRENGGALEK         | 3503  | TRENGGALEK        | 3503  | TRENGGALEK          | 3503  | TRENGGALEK         | 3503  | TRENGGALEK        |
| 3504  | TULUNGAGUNG       | 3504  | TULUNGAGUNG        | 3504  | TULUNGAGUNG       | 3504  | TULUNGAGUNG        | 3504  | TULUNGAGUNG       | 3504  | TULUNGAGUNG         | 3504  | TULUNGAGUNG        | 3504  | TULUNGAGUNG       |
| 3505  | BLITAR            | 3505  | BLITAR             | 3505  | BLITAR            | 3505  | BLITAR             | 3505  | BLITAR            | 3505  | BLITAR              | 3505  | BLITAR             | 3505  | BLITAR            |
| 3506  | KEDIRI            | 3506  | KEDIRI             | 3506  | KEDIRI            | 3506  | KEDIRI             | 3506  | KEDIRI            | 3506  | KEDIRI              | 3506  | KEDIRI             | 3506  | KEDIRI            |
| 3507  | MALANG            | 3507  | MALANG             | 3507  | MALANG            | 3507  | MALANG             | 3507  | MALANG            | 3507  | MALANG              | 3507  | MALANG             | 3507  | MALANG            |
| 3508  | LUMAJANG          | 3508  | LUMAJANG           | 3508  | LUMAJANG          | 3508  | LUMAJANG           | 3508  | LUMAJANG          | 3508  | LUMAJANG            | 3508  | LUMAJANG           | 3508  | LUMAJANG          |
| 3509  | JEMBER            | 3509  | JEMBER             | 3509  | JEMBER            | 3509  | JEMBER             | 3509  | JEMBER            | 3509  | JEMBER              | 3509  | JEMBER             | 3509  | JEMBER            |
| 3510  | BANYUWANGI        | 3510  | BANYUWANGI         | 3510  | BANYUWANGI        | 3510  | BANYUWANGI         | 3510  | BANYUWANGI        | 3510  | BANYUWANGI          | 3510  | BANYUWANGI         | 3510  | BANYUWANGI        |
| 3511  | BONDOWOSO         | 3511  | BONDOWOSO          | 3511  | BONDOWOSO         | 3511  | BONDOWOSO          | 3511  | BONDOWOSO         | 3511  | BONDOWOSO           | 3511  | BONDOWOSO          | 3511  | BONDOWOSO         |
| 3512  | SITUBONDO         | 3512  | SITUBONDO          | 3512  | SITUBONDO         | 3512  | SITUBONDO          | 3512  | SITUBONDO         | 3512  | SITUBONDO           | 3512  | SITUBONDO          | 3512  | SITUBONDO         |
| 3513  | PROBOLINGGO       | 3513  | PROBOLINGGO        | 3513  | PROBOLINGGO       | 3513  | PROBOLINGGO        | 3513  | PROBOLINGGO       | 3513  | PROBOLINGGO         | 3513  | PROBOLINGGO        | 3513  | PROBOLINGGO       |
| 3514  | PASURUAN          | 3514  | PASURUAN           | 3514  | PASURUAN          | 3514  | PASURUAN           | 3514  | PASURUAN          | 3514  | PASURUAN            | 3514  | PASURUAN           | 3514  | PASURUAN          |
| 3515  | SIDOARJO          | 3515  | SIDOARJO           | 3515  | SIDOARJO          | 3515  | SIDOARJO           | 3515  | SIDOARJO          | 3515  | SIDOARJO            | 3515  | SIDOARJO           | 3515  | SIDOARJO          |
| 3516  | MOJOKERTO         | 3516  | MOJOKERTO          | 3516  | MOJOKERTO         | 3516  | MOJOKERTO          | 3516  | MOJOKERTO         | 3516  | MOJOKERTO           | 3516  | MOJOKERTO          | 3516  | MOJOKERTO         |
| 3517  | JOMBANG           | 3517  | JOMBANG            | 3517  | JOMBANG           | 3517  | JOMBANG            | 3517  | JOMBANG           | 3517  | JOMBANG             | 3517  | JOMBANG            | 3517  | JOMBANG           |
| 3518  | NGANJUK           | 3518  | NGANJUK            | 3518  | NGANJUK           | 3518  | NGANJUK            | 3518  | NGANJUK           | 3518  | NGANJUK             | 3518  | NGANJUK            | 3518  | NGANJUK           |
| 3519  | MADIUN            | 3519  | MADIUN             | 3519  | MADIUN            | 3519  | MADIUN             | 3519  | MADIUN            | 3519  | MADIUN              | 3519  | MADIUN             | 3519  | MADIUN            |
| 3520  | MAGETAN           | 3520  | MAGETAN            | 3520  | MAGETAN           | 3520  | MAGETAN            | 3520  | MAGETAN           | 3520  | MAGETAN             | 3520  | MAGETAN            | 3520  | MAGETAN           |
| 3521  | NGAWI             | 3521  | NGAWI              | 3521  | NGAWI             | 3521  | NGAWI              | 3521  | NGAWI             | 3521  | NGAWI               | 3521  | NGAWI              | 3521  | NGAWI             |
| 3522  | BOJONEGORO        | 3522  | BOJONEGORO         | 3522  | BOJONEGORO        | 3522  | BOJONEGORO         | 3522  | BOJONEGORO        | 3522  | BOJONEGORO          | 3522  | BOJONEGORO         | 3522  | BOJONEGORO        |
| 3523  | TUBAN             | 3523  | TUBAN              | 3523  | TUBAN             | 3523  | TUBAN              | 3523  | TUBAN             | 3523  | TUBAN               | 3523  | TUBAN              | 3523  | TUBAN             |
| 3524  | LAMONGAN          | 3524  | LAMONGAN           | 3524  | LAMONGAN          | 3524  | LAMONGAN           | 3524  | LAMONGAN          | 3524  | LAMONGAN            | 3524  | LAMONGAN           | 3524  | LAMONGAN          |
| 3525  | GRESIK            | 3525  | GRESIK             | 3525  | GRESIK            | 3525  | GRESIK             | 3525  | GRESIK            | 3525  | GRESIK              | 3525  | GRESIK             | 3525  | GRESIK            |
| 3526  | BANGKALAN         | 3526  | BANGKALAN          | 3526  | BANGKALAN         | 3526  | BANGKALAN          | 3526  | BANGKALAN         | 3526  | BANGKALAN           | 3526  | BANGKALAN          | 3526  | BANGKALAN         |
| 3527  | SAMPANG           | 3527  | SAMPANG            | 3527  | SAMPANG           | 3527  | SAMPANG            | 3527  | SAMPANG           | 3527  | SAMPANG             | 3527  | SAMPANG            | 3527  | SAMPANG           |
| 3528  | PAMEKASAN         | 3528  | PAMEKASAN          | 3528  | PAMEKASAN         | 3528  | PAMEKASAN          | 3528  | PAMEKASAN         | 3528  | PAMEKASAN           | 3528  | PAMEKASAN          | 3528  | PAMEKASAN         |
| 3529  | SUMENEP           | 3529  | SUMENEP            | 3529  | SUMENEP           | 3529  | SUMENEP            | 3529  | SUMENEP           | 3529  | SUMENEP             | 3529  | SUMENEP            | 3529  | SUMENEP           |
| 3571  | KOTA KEDIRI       | 3571  | KOTA KEDIRI        | 3571  | KOTA KEDIRI       | 3571  | KOTA KEDIRI        | 3571  | KOTA KEDIRI       | 3571  | KOTA KEDIRI         | 3571  | KOTA KEDIRI        | 3571  | KOTA KEDIRI       |
| 3572  | KOTA BLITAR       | 3572  | KOTA BLITAR        | 3572  | KOTA BLITAR       | 3572  | KOTA BLITAR        | 3572  | KOTA BLITAR       | 3572  | KOTA BLITAR         | 3572  | KOTA BLITAR        | 3572  | KOTA BLITAR       |
| 3573  | KOTA MALANG       | 3573  | KOTA MALANG        | 3573  | KOTA MALANG       | 3573  | KOTA MALANG        | 3573  | KOTA MALANG       | 3573  | KOTA MALANG         | 3573  | KOTA MALANG        | 3573  | KOTA MALANG       |
| 3574  | KOTA PROBOLINGGO  | 3574  | KOTA PROBOLINGGO   | 3574  | KOTA PROBOLINGGO  | 3574  | KOTA PROBOLINGGO   | 3574  | KOTA PROBOLINGGO  | 3574  | KOTA PROBOLINGGO    | 3574  | KOTA PROBOLINGGO   | 3574  | KOTA PROBOLINGGO  |
| 3575  | KOTA PASURUAN     | 3575  | KOTA PASURUAN      | 3575  | KOTA PASURUAN     | 3575  | KOTA PASURUAN      | 3575  | KOTA PASURUAN     | 3575  | KOTA PASURUAN       | 3575  | KOTA PASURUAN      | 3575  | KOTA PASURUAN     |
| 3576  | KOTA MOJOKERTO    | 3576  | KOTA MOJOKERTO     | 3576  | KOTA MOJOKERTO    | 3576  | KOTA MOJOKERTO     | 3576  | KOTA MOJOKERTO    | 3576  | KOTA MOJOKERTO      | 3576  | KOTA MOJOKERTO     | 3576  | KOTA MOJOKERTO    |
| 3577  | KOTA MADIUN       | 3577  | KOTA MADIUN        | 3577  | KOTA MADIUN       | 3577  | KOTA MADIUN        | 3577  | KOTA MADIUN       | 3577  | KOTA MADIUN         | 3577  | KOTA MADIUN        | 3577  | KOTA MADIUN       |
| 3578  | KOTA SURABAYA     | 3578  | KOTA SURABAYA      | 3578  | KOTA SURABAYA     | 3578  | KOTA SURABAYA      | 3578  | KOTA SURABAYA     | 3578  | KOTA SURABAYA       | 3578  | KOTA SURABAYA      | 3578  | KOTA SURABAYA     |
| 3579  | KOTA BATU         | 3579  | KOTA BATU          | 3579  | KOTA BATU         | 3579  | KOTA BATU          | 3579  | KOTA BATU         | 3579  | KOTA BATU           | 3579  | KOTA BATU          | 3579  | KOTA BATU         |
| 3600  | BANTEN            | 3600  | BANTEN             | 3600  | BANTEN            | 3600  | BANTEN             | 3600  | BANTEN            | 3600  | BANTEN              | 3600  | BANTEN             | 3600  | BANTEN            |
| 3601  | PANDEGLANG        | 3601  | PANDEGLANG         | 3601  | PANDEGLANG        | 3601  | PANDEGLANG         | 3601  | PANDEGLANG        | 3601  | PANDEGLANG          | 3601  | PANDEGLANG         | 3601  | PANDEGLANG        |
| 3602  | LEBAK             | 3602  | LEBAK              | 3602  | LEBAK             | 3602  | LEBAK              | 3602  | LEBAK             | 3602  | LEBAK               | 3602  | LEBAK              | 3602  | LEBAK             |
| 3603  | TANGERANG         | 3603  | TANGERANG          | 3603  | TANGERANG         | 3603  | TANGERANG          | 3603  | TANGERANG         | 3603  | TANGERANG           | 3603  | TANGERANG          | 3603  | TANGERANG         |
| 3604  | SERANG            | 3604  | SERANG             | 3604  | SERANG            | 3604  | SERANG             | 3604  | SERANG            | 3604  | SERANG              | 3604  | SERANG             | 3604  | SERANG            |
| 3671  | KOTA TANGERANG    | 3671  | KOTA TANGERANG     | 3671  | KOTA TANGERANG    | 3671  | KOTA TANGERANG     | 3671  | KOTA TANGERANG    | 3671  | KOTA TANGERANG      | 3671  | KOTA TANGERANG     | 3671  | KOTA TANGERANG    |
| 3672  | KOTA CILEGON      | 3672  | KOTA CILEGON       | 3672  | KOTA CILEGON      | 3672  | KOTA CILEGON       | 3672  | KOTA CILEGON      | 3672  | KOTA CILEGON        | 3672  | KOTA CILEGON       | 3672  | KOTA CILEGON      |
| 3604  | SERANG            | 3604  | SERANG             | 3673  | KOTA SERANG       | 3673  | KOTA SERANG        | 3673  | KOTA SERANG       | 3673  | KOTA SERANG         | 3673  | KOTA SERANG        | 3673  | KOTA SERANG       |

[illegible]



**Master File Kabupaten 2003 - 2009**[illegible]

**Master File Kabupaten 2003 - 2009**[illegible]

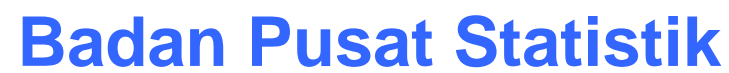[illegible]
