# Supplementary material for: Democratization, leader education and growth: firm-level evidence from Indonesia
Source: Springer Nature journal article supplement (doi:10.1007/s10887-022-09221-5), 2023-02-15
Supplement: MOESM2 [file kabupaten codes 2003.pdf › Data/kabupaten codes 2003.pdf]

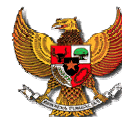

| 2003 (June) |                                                         | 2002 (December)                                         |                     |
|-------------|---------------------------------------------------------|---------------------------------------------------------|---------------------|
| Code        | Propinsi/Kabupaten/Kota (Province/Regency/Municipality) | Propinsi/Kabupaten/Kota (Province/Regency/Municipality) |                     |
| <b>1100</b> | <b>Prov. Nanggroe Aceh Darussalam</b>                   |                                                         |                     |
| 1101        | Kab. Simeulue                                           |                                                         |                     |
| 1102        | Kab. Aceh Singkil                                       |                                                         |                     |
| 1103        | Kab. Aceh Selatan                                       |                                                         |                     |
| 1104        | Kab. Aceh Tenggara                                      |                                                         |                     |
| 1105        | Kab. Aceh Timur                                         |                                                         |                     |
| 1106        | Kab. Aceh Tengah                                        |                                                         |                     |
| 1107        | Kab. Aceh Barat                                         |                                                         |                     |
| 1108        | Kab. Aceh Besar                                         |                                                         |                     |
| 1109        | Kab. Pidie                                              |                                                         |                     |
| 1110        | Kab. Bireuen                                            |                                                         |                     |
| 1111        | Kab. Aceh Utara                                         |                                                         |                     |
| 1112        | Kab. Aceh Barat Daya                                    |                                                         |                     |
| 1113        | Kab. Gayo Lues                                          |                                                         |                     |
| 1114        | Kab. Aceh Tamiang                                       |                                                         |                     |
| 1115        | Kab. Nagan Raya                                         |                                                         |                     |
| 1116        | Kab. Aceh Jaya                                          |                                                         |                     |
| 1171        | Kota Banda Aceh                                         |                                                         |                     |
| 1172        | Kota Sabang                                             |                                                         |                     |
| 1173        | Kota Langsa                                             |                                                         |                     |
| 1174        | Kota Lhokseumawe                                        |                                                         |                     |
| <b>1200</b> | <b>Prov. Sumatera Utara</b>                             |                                                         |                     |
| 1201        | Kab. Nias                                               |                                                         |                     |
| 1202        | Kab. Mandailing Natal                                   |                                                         |                     |
| 1203        | Kab. Tapanuli Selatan                                   |                                                         |                     |
| 1204        | Kab. Tapanuli Tengah                                    |                                                         |                     |
| 1205        | Kab. Tapanuli Utara                                     |                                                         |                     |
| 1206        | Kab. Toba Samosir                                       |                                                         |                     |
| 1207        | Kab. Labuhan Batu                                       |                                                         |                     |
| 1208        | Kab. Asahan                                             |                                                         |                     |
| 1209        | Kab. Simalungun                                         |                                                         |                     |
| 1210        | Kab. Dairi                                              |                                                         |                     |
| 1211        | Kab. Karo                                               |                                                         |                     |
| 1212        | Kab. Deli Serdang                                       |                                                         |                     |
| 1213        | Kab. Langkat                                            |                                                         |                     |
| 1214        | Kab. Nias Selatan                                       | 1201                                                    | Kab. Nias           |
| 1215        | Kab. Humbang Hasundutan                                 | 1205                                                    | Kab. Tapanuli Utara |
| 1216        | Kab. Pakpak Bharat                                      | 1210                                                    | Kab. Dairi          |
| 1271        | Kota Sibolga                                            |                                                         |                     |
| 1272        | Kota Tanjung Balai                                      |                                                         |                     |
| 1273        | Kota Pematang Siantar                                   |                                                         |                     |
| 1274        | Kota Tebing Tinggi                                      |                                                         |                     |
| 1275        | Kota Medan                                              |                                                         |                     |
| 1276        | Kota Binjai                                             |                                                         |                     |
| 1277        | Kota Padang Sidempuan                                   |                                                         |                     |
| <b>1300</b> | <b>Prov. Sumatera Barat</b>                             |                                                         |                     |
| 1301        | Kab. Kepulauan Mentawai                                 |                                                         |                     |
| 1302        | Kab. Pesisir Selatan                                    |                                                         |                     |
| 1303        | Kab. Solok                                              |                                                         |                     |
| 1304        | Kab. Sawahlunto/Sijunjung                               |                                                         |                     |
| 1305        | Kab. Tanah Datar                                        |                                                         |                     |
| 1306        | Kab. Padang Pariaman                                    |                                                         |                     |
| 1307        | Kab. Agam                                               |                                                         |                     |
| 1308        | Kab. Lima Puluh Koto                                    |                                                         |                     |



| 2003 (June) |                                                         | 2002 (December) |                                                         |
|-------------|---------------------------------------------------------|-----------------|---------------------------------------------------------|
| Code        | Propinsi/Kabupaten/Kota (Province/Regency/Municipality) |                 | Propinsi/Kabupaten/Kota (Province/Regency/Municipality) |
| 1309        | Kab. Pasaman                                            |                 |                                                         |
| 1371        | Kota Padang                                             |                 |                                                         |
| 1372        | Kota Solok                                              |                 |                                                         |
| 1373        | Kota Sawah Lunto                                        |                 |                                                         |
| 1374        | Kota Padang Panjang                                     |                 |                                                         |
| 1375        | Kota Bukittinggi                                        |                 |                                                         |
| 1376        | Kota Payakumbuh                                         |                 |                                                         |
| 1377        | Kota Pariaman                                           |                 |                                                         |
| <b>1400</b> | <b>Prov. Riau</b>                                       |                 |                                                         |
| 1401        | Kab. Kuantan Singingi                                   |                 |                                                         |
| 1402        | Kab. Indragiri Hulu                                     |                 |                                                         |
| 1403        | Kab. Indragiri Hilir                                    |                 |                                                         |
| 1404        | Kab. Pelalawan                                          |                 |                                                         |
| 1405        | Kab. Siak                                               |                 |                                                         |
| 1406        | Kab. Kampar                                             |                 |                                                         |
| 1407        | Kab. Rokan Hulu                                         |                 |                                                         |
| 1408        | Kab. Bengkalis                                          |                 |                                                         |
| 1409        | Kab. Rokan Hilir                                        |                 |                                                         |
| 1471        | Kota Pekanbaru                                          |                 |                                                         |
| 1473        | Kota Dumai                                              |                 |                                                         |
| <b>1500</b> | <b>Prov. Jambi</b>                                      |                 |                                                         |
| 1501        | Kab. Kerinci                                            |                 |                                                         |
| 1502        | Kab. Merangin                                           |                 |                                                         |
| 1503        | Kab. Sarolangun                                         |                 |                                                         |
| 1504        | Kab. Batang Hari                                        |                 |                                                         |
| 1505        | Kab. Muaro Jambi                                        |                 |                                                         |
| 1506        | Kab. Tanjung Jabung Timur                               |                 |                                                         |
| 1507        | Kab. Tanjung Jabung Barat                               |                 |                                                         |
| 1508        | Kab. Tebo                                               |                 |                                                         |
| 1509        | Kab. Bungo                                              |                 |                                                         |
| 1571        | Kota Jambi                                              |                 |                                                         |
| <b>1600</b> | <b>Prov. Sumatera Selatan</b>                           |                 |                                                         |
| 1601        | Kab. Ogan Komering Ulu                                  |                 |                                                         |
| 1602        | Kab. Ogan Komering Ilir                                 |                 |                                                         |
| 1603        | Kab. Muara Enim                                         |                 |                                                         |
| 1604        | Kab. Lahat                                              |                 |                                                         |
| 1605        | Kab. Musi Rawas                                         |                 |                                                         |
| 1606        | Kab. Musi Banyu Asin                                    |                 |                                                         |
| 1607        | Kab. Banyuasin                                          |                 |                                                         |
| 1671        | Kota Palembang                                          |                 |                                                         |
| 1672        | Kota Prabumulih                                         |                 |                                                         |
| 1673        | Kota Pagar Alam                                         |                 |                                                         |
| 1674        | Kota Lubuk Linggau                                      |                 |                                                         |
| <b>1700</b> | <b>Prov. Bengkulu</b>                                   |                 |                                                         |
| 1701        | Kab. Bengkulu Selatan                                   |                 |                                                         |
| 1702        | Kab. Rejang Lebong                                      |                 |                                                         |
| 1703        | Kab. Bengkulu Utara                                     |                 |                                                         |
| 1704        | Kab. Kaur                                               | 1701            | Kab. Bengkulu Selatan                                   |
| 1705        | Kab. Seluma                                             | 1701            | Kab. Bengkulu Selatan                                   |
| 1706        | Kab. Mukomuko                                           | 1703            | Kab. Bengkulu Utara                                     |
| 1771        | Kota Bengkulu                                           |                 |                                                         |
| <b>1800</b> | <b>Prov. Lampung</b>                                    |                 |                                                         |
| 1801        | Kab. Lampung Barat                                      |                 |                                                         |
| 1802        | Kab. Tanggamus                                          |                 |                                                         |



| 2003 (June) |                                                         | 2002 (December)                                         |               |
|-------------|---------------------------------------------------------|---------------------------------------------------------|---------------|
| Code        | Propinsi/Kabupaten/Kota (Province/Regency/Municipality) | Propinsi/Kabupaten/Kota (Province/Regency/Municipality) |               |
| 1803        | Kab. Lampung Selatan                                    |                                                         |               |
| 1804        | Kab. Lampung Timur                                      |                                                         |               |
| 1805        | Kab. Lampung Tengah                                     |                                                         |               |
| 1806        | Kab. Lampung Utara                                      |                                                         |               |
| 1807        | Kab. Way Kanan                                          |                                                         |               |
| 1808        | Kab. Tulang Bawang                                      |                                                         |               |
| 1871        | Kota Bandar Lampung                                     |                                                         |               |
| 1872        | Kota Metro                                              |                                                         |               |
| <b>1900</b> | <b>Prov. Kepulauan Bangka Belitung</b>                  |                                                         |               |
| 1901        | Kab. Bangka                                             |                                                         |               |
| 1902        | Kab. Belitung                                           |                                                         |               |
| 1903        | Kab. Bangka Selatan                                     | 1901                                                    | Kab. Bangka   |
| 1904        | Kab. Bangka Tengah                                      | 1901                                                    | Kab. Bangka   |
| 1905        | Kab. Bangka Barat                                       | 1901                                                    | Kab. Bangka   |
| 1906        | Kab. Belitung Timur                                     | 1902                                                    | Kab. Belitung |
| 1971        | Kota Pangkal Pinang                                     |                                                         |               |
| <b>2000</b> | <b>Prov. Kepulauan Riau</b>                             |                                                         |               |
| 2001        | Kab. Karimun                                            |                                                         |               |
| 2002        | Kab. Kepulauan Riau                                     |                                                         |               |
| 2003        | Kab. Natuna                                             |                                                         |               |
| 2071        | Kota Batam                                              |                                                         |               |
| 2072        | Kota Tanjung Pinang                                     |                                                         |               |
| <b>3100</b> | <b>Prov. Daerah Khusus Ibukota Jakarta</b>              |                                                         |               |
| 3101        | Kab. Adm. Kepulauan Seribu                              |                                                         |               |
| 3171        | Kota Jakarta Selatan                                    |                                                         |               |
| 3172        | Kota Jakarta Timur                                      |                                                         |               |
| 3173        | Kota Jakarta Pusat                                      |                                                         |               |
| 3174        | Kota Jakarta Barat                                      |                                                         |               |
| 3175        | Kota Jakarta Utara                                      |                                                         |               |
| <b>3200</b> | <b>Prov. Jawa Barat</b>                                 |                                                         |               |
| 3201        | Kab. Bogor                                              |                                                         |               |
| 3202        | Kab. Sukabumi                                           |                                                         |               |
| 3203        | Kab. Cianjur                                            |                                                         |               |
| 3204        | Kab. Bandung                                            |                                                         |               |
| 3205        | Kab. Garut                                              |                                                         |               |
| 3206        | Kab. Tasikmalaya                                        |                                                         |               |
| 3207        | Kab. Ciamis                                             |                                                         |               |
| 3208        | Kab. Kuningan                                           |                                                         |               |
| 3209        | Kab. Cirebon                                            |                                                         |               |
| 3210        | Kab. Majalengka                                         |                                                         |               |
| 3211        | Kab. Sumedang                                           |                                                         |               |
| 3212        | Kab. Indramayu                                          |                                                         |               |
| 3213        | Kab. Subang                                             |                                                         |               |
| 3214        | Kab. Purwakarta                                         |                                                         |               |
| 3215        | Kab. Karawang                                           |                                                         |               |
| 3216        | Kab. Bekasi                                             |                                                         |               |
| 3271        | Kota Bogor                                              |                                                         |               |
| 3272        | Kota Sukabumi                                           |                                                         |               |
| 3273        | Kota Bandung                                            |                                                         |               |
| 3274        | Kota Cirebon                                            |                                                         |               |
| 3275        | Kota Bekasi                                             |                                                         |               |
| 3276        | Kota Depok                                              |                                                         |               |
| 3277        | Kota Cimahi                                             |                                                         |               |
| 3278        | Kota Tasikmalaya                                        |                                                         |               |



| 2003 (June) |                                                         | 2002 (December) |                                                         |
|-------------|---------------------------------------------------------|-----------------|---------------------------------------------------------|
| Code        | Propinsi/Kabupaten/Kota (Province/Regency/Municipality) |                 | Propinsi/Kabupaten/Kota (Province/Regency/Municipality) |
| 3279        | Kota Banjar                                             |                 |                                                         |
| <b>3300</b> | <b>Prov. Jawa Tengah</b>                                |                 |                                                         |
| 3301        | Kab. Cilacap                                            |                 |                                                         |
| 3302        | Kab. Banyumas                                           |                 |                                                         |
| 3303        | Kab. Purbalingga                                        |                 |                                                         |
| 3304        | Kab. Banjarnegara                                       |                 |                                                         |
| 3305        | Kab. Kebumen                                            |                 |                                                         |
| 3306        | Kab. Purworejo                                          |                 |                                                         |
| 3307        | Kab. Wonosobo                                           |                 |                                                         |
| 3308        | Kab. Magelang                                           |                 |                                                         |
| 3309        | Kab. Boyolali                                           |                 |                                                         |
| 3310        | Kab. Klaten                                             |                 |                                                         |
| 3311        | Kab. Sukoharjo                                          |                 |                                                         |
| 3312        | Kab. Wonogiri                                           |                 |                                                         |
| 3313        | Kab. Karanganyar                                        |                 |                                                         |
| 3314        | Kab. Sragen                                             |                 |                                                         |
| 3315        | Kab. Grobogan                                           |                 |                                                         |
| 3316        | Kab. Blora                                              |                 |                                                         |
| 3317        | Kab. Rembang                                            |                 |                                                         |
| 3318        | Kab. Pati                                               |                 |                                                         |
| 3319        | Kab. Kudus                                              |                 |                                                         |
| 3320        | Kab. Jepara                                             |                 |                                                         |
| 3321        | Kab. Demak                                              |                 |                                                         |
| 3322        | Kab. Semarang                                           |                 |                                                         |
| 3323        | Kab. Temanggung                                         |                 |                                                         |
| 3324        | Kab. Kendal                                             |                 |                                                         |
| 3325        | Kab. Batang                                             |                 |                                                         |
| 3326        | Kab. Pekalongan                                         |                 |                                                         |
| 3327        | Kab. Pemalang                                           |                 |                                                         |
| 3328        | Kab. Tegal                                              |                 |                                                         |
| 3329        | Kab. Brebes                                             |                 |                                                         |
| 3371        | Kota Magelang                                           |                 |                                                         |
| 3372        | Kota Surakarta                                          |                 |                                                         |
| 3373        | Kota Salatiga                                           |                 |                                                         |
| 3374        | Kota Semarang                                           |                 |                                                         |
| 3375        | Kota Pekalongan                                         |                 |                                                         |
| 3376        | Kota Tegal                                              |                 |                                                         |
| <b>3400</b> | <b>Prov. Daerah Istimewa Yogyakarta</b>                 |                 |                                                         |
| 3401        | Kab. Kulon Progo                                        |                 |                                                         |
| 3402        | Kab. Bantul                                             |                 |                                                         |
| 3403        | Kab. Gunung Kidul                                       |                 |                                                         |
| 3404        | Kab. Sleman                                             |                 |                                                         |
| 3471        | Kota Yogyakarta                                         |                 |                                                         |
| <b>3500</b> | <b>Prov. Jawa Timur</b>                                 |                 |                                                         |
| 3501        | Kab. Pacitan                                            |                 |                                                         |
| 3502        | Kab. Ponorogo                                           |                 |                                                         |
| 3503        | Kab. Trenggalek                                         |                 |                                                         |
| 3504        | Kab. Tulungagung                                        |                 |                                                         |
| 3505        | Kab. Blitar                                             |                 |                                                         |
| 3506        | Kab. Kediri                                             |                 |                                                         |
| 3507        | Kab. Malang                                             |                 |                                                         |
| 3508        | Kab. Lumajang                                           |                 |                                                         |
| 3509        | Kab. Jember                                             |                 |                                                         |
| 3510        | Kab. Banyuwangi                                         |                 |                                                         |



| 2003 (June) |                                                         | 2002 (December) |                                                         |
|-------------|---------------------------------------------------------|-----------------|---------------------------------------------------------|
| Code        | Propinsi/Kabupaten/Kota (Province/Regency/Municipality) |                 | Propinsi/Kabupaten/Kota (Province/Regency/Municipality) |
| 3511        | Kab. Bondowoso                                          |                 |                                                         |
| 3512        | Kab. Situbondo                                          |                 |                                                         |
| 3513        | Kab. Probolinggo                                        |                 |                                                         |
| 3514        | Kab. Pasuruan                                           |                 |                                                         |
| 3515        | Kab. Sidoarjo                                           |                 |                                                         |
| 3516        | Kab. Mojokerto                                          |                 |                                                         |
| 3517        | Kab. Jombang                                            |                 |                                                         |
| 3518        | Kab. Nganjuk                                            |                 |                                                         |
| 3519        | Kab. Madiun                                             |                 |                                                         |
| 3520        | Kab. Magetan                                            |                 |                                                         |
| 3521        | Kab. Ngawi                                              |                 |                                                         |
| 3522        | Kab. Bojonegoro                                         |                 |                                                         |
| 3523        | Kab. Tuban                                              |                 |                                                         |
| 3524        | Kab. Lamongan                                           |                 |                                                         |
| 3525        | Kab. Gresik                                             |                 |                                                         |
| 3526        | Kab. Bangkalan                                          |                 |                                                         |
| 3527        | Kab. Sampang                                            |                 |                                                         |
| 3528        | Kab. Pamekasan                                          |                 |                                                         |
| 3529        | Kab. Sumenep                                            |                 |                                                         |
| 3571        | Kota Kediri                                             |                 |                                                         |
| 3572        | Kota Blitar                                             |                 |                                                         |
| 3573        | Kota Malang                                             |                 |                                                         |
| 3574        | Kota Probolinggo                                        |                 |                                                         |
| 3575        | Kota Pasuruan                                           |                 |                                                         |
| 3576        | Kota Mojokerto                                          |                 |                                                         |
| 3577        | Kota Madiun                                             |                 |                                                         |
| 3578        | Kota Surabaya                                           |                 |                                                         |
| 3579        | Kota Batu                                               |                 |                                                         |
| <b>3600</b> | <b>Prov. Banten</b>                                     |                 |                                                         |
| 3601        | Kab. Pandeglang                                         |                 |                                                         |
| 3602        | Kab. Lebak                                              |                 |                                                         |
| 3603        | Kab. Tangerang                                          |                 |                                                         |
| 3604        | Kab. Serang                                             |                 |                                                         |
| 3671        | Kota Tangerang                                          |                 |                                                         |
| 3672        | Kota Cilegon                                            |                 |                                                         |
| <b>5100</b> | <b>Prov. Bali</b>                                       |                 |                                                         |
| 5101        | Kab. Jembrana                                           |                 |                                                         |
| 5102        | Kab. Tabanan                                            |                 |                                                         |
| 5103        | Kab. Badung                                             |                 |                                                         |
| 5104        | Kab. Gianyar                                            |                 |                                                         |
| 5105        | Kab. Klungkung                                          |                 |                                                         |
| 5106        | Kab. Bangli                                             |                 |                                                         |
| 5107        | Kab. Karang Asem                                        |                 |                                                         |
| 5108        | Kab. Buleleng                                           |                 |                                                         |
| 5171        | Kota Denpasar                                           |                 |                                                         |
| <b>5200</b> | <b>Prov. Nusa Tenggara Barat</b>                        |                 |                                                         |
| 5201        | Kab. Lombok Barat                                       |                 |                                                         |
| 5202        | Kab. Lombok Tengah                                      |                 |                                                         |
| 5203        | Kab. Lombok Timur                                       |                 |                                                         |
| 5204        | Kab. Sumbawa                                            |                 |                                                         |
| 5205        | Kab. Dompu                                              |                 |                                                         |
| 5206        | Kab. Bima                                               |                 |                                                         |
| 5271        | Kota Mataram                                            |                 |                                                         |
| 5272        | Kota Bima                                               |                 |                                                         |



| 2003 (June) |                                                         | 2002 (December) |                                                         |
|-------------|---------------------------------------------------------|-----------------|---------------------------------------------------------|
| Code        | Propinsi/Kabupaten/Kota (Province/Regency/Municipality) |                 | Propinsi/Kabupaten/Kota (Province/Regency/Municipality) |
| <b>5300</b> | <b>Prov. Nusa Tenggara Timur</b>                        |                 |                                                         |
| 5301        | Kab. Sumba Barat                                        |                 |                                                         |
| 5302        | Kab. Sumba Timur                                        |                 |                                                         |
| 5303        | Kab. Kupang                                             |                 |                                                         |
| 5304        | Kab. Timor Tengah Selatan                               |                 |                                                         |
| 5305        | Kab. Timor Tengah Utara                                 |                 |                                                         |
| 5306        | Kab. Belu                                               |                 |                                                         |
| 5307        | Kab. Alor                                               |                 |                                                         |
| 5308        | Kab. Lembata                                            |                 |                                                         |
| 5309        | Kab. Flores Timur                                       |                 |                                                         |
| 5310        | Kab. Sikka                                              |                 |                                                         |
| 5311        | Kab. Ende                                               |                 |                                                         |
| 5312        | Kab. Ngada                                              |                 |                                                         |
| 5313        | Kab. Manggarai                                          |                 |                                                         |
| 5314        | Kab. Rote Ndao                                          |                 |                                                         |
| 5315        | Kab. Manggarai Barat                                    | 5313            | Kab. Manggarai                                          |
| 5371        | Kota Kupang                                             |                 |                                                         |
| <b>6100</b> | <b>Prov. Kalimantan Barat</b>                           |                 |                                                         |
| 6101        | Kab. Sambas                                             |                 |                                                         |
| 6102        | Kab. Bengkayang                                         |                 |                                                         |
| 6103        | Kab. Landak                                             |                 |                                                         |
| 6104        | Kab. Pontianak                                          |                 |                                                         |
| 6105        | Kab. Sanggau                                            |                 |                                                         |
| 6106        | Kab. Ketapang                                           |                 |                                                         |
| 6107        | Kab. Sintang                                            |                 |                                                         |
| 6108        | Kab. Kapuas Hulu                                        |                 |                                                         |
| 6171        | Kota Pontianak                                          |                 |                                                         |
| 6172        | Kota Singkawang                                         |                 |                                                         |
| <b>6200</b> | <b>Prov. Kalimantan Tengah</b>                          |                 |                                                         |
| 6201        | Kab. Kotawaringin Barat                                 |                 |                                                         |
| 6202        | Kab. Kotawaringin Timur                                 |                 |                                                         |
| 6203        | Kab. Kapuas                                             |                 |                                                         |
| 6204        | Kab. Barito Selatan                                     |                 |                                                         |
| 6205        | Kab. Barito Utara                                       |                 |                                                         |
| 6206        | Kab. Sukamara                                           |                 |                                                         |
| 6207        | Kab. Lamandau                                           |                 |                                                         |
| 6208        | Kab. Seruyan                                            |                 |                                                         |
| 6209        | Kab. Katingan                                           |                 |                                                         |
| 6210        | Kab. Pulang Pisau                                       |                 |                                                         |
| 6211        | Kab. Gunung Mas                                         |                 |                                                         |
| 6212        | Kab. Barito Timur                                       |                 |                                                         |
| 6213        | Kab. Murung Raya                                        |                 |                                                         |
| 6271        | Kota Palangka Raya                                      |                 |                                                         |
| <b>6300</b> | <b>Prov. Kalimantan Selatan</b>                         |                 |                                                         |
| 6301        | Kab. Tanah Laut                                         |                 |                                                         |
| 6302        | Kab. Kota Baru                                          |                 |                                                         |
| 6303        | Kab. Banjar                                             |                 |                                                         |
| 6304        | Kab. Barito Kuala                                       |                 |                                                         |
| 6305        | Kab. Tapin                                              |                 |                                                         |
| 6306        | Kab. Hulu Sungai Selatan                                |                 |                                                         |
| 6307        | Kab. Hulu Sungai Tengah                                 |                 |                                                         |
| 6308        | Kab. Hulu Sungai Utara                                  |                 |                                                         |
| 6309        | Kab. Tabalong                                           |                 |                                                         |
| 6310        | Kab. Tanah Bumbu                                        | 6302            | Kab. Kota Baru                                          |



| 2003 (June) |                                                         | 2002 (December)                                         |                        |
|-------------|---------------------------------------------------------|---------------------------------------------------------|------------------------|
| Code        | Propinsi/Kabupaten/Kota (Province/Regency/Municipality) | Propinsi/Kabupaten/Kota (Province/Regency/Municipality) |                        |
| 6311        | Kab. Balangan                                           | 6308                                                    | Kab. Hulu Sungai Utara |
| 6371        | Kota Banjarmasin                                        |                                                         |                        |
| 6372        | Kota Banjar Baru                                        |                                                         |                        |
| <b>6400</b> | <b>Prov. Kalimantan Timur</b>                           |                                                         |                        |
| 6401        | Kab. Pasir                                              |                                                         |                        |
| 6402        | Kab. Kutai Barat                                        |                                                         |                        |
| 6403        | Kab. Kutai                                              |                                                         |                        |
| 6404        | Kab. Kutai Timur                                        |                                                         |                        |
| 6405        | Kab. Berau                                              |                                                         |                        |
| 6406        | Kab. Malinau                                            |                                                         |                        |
| 6407        | Kab. Bulongan                                           |                                                         |                        |
| 6408        | Kab. Nunukan                                            |                                                         |                        |
| 6409        | Kab. Penajam Paser Utara                                |                                                         |                        |
| 6471        | Kota Balikpapan                                         |                                                         |                        |
| 6472        | Kota Samarinda                                          |                                                         |                        |
| 6473        | Kota Tarakan                                            |                                                         |                        |
| 6474        | Kota Bontang                                            |                                                         |                        |
| <b>7100</b> | <b>Prov. Sulawesi Utara</b>                             |                                                         |                        |
| 7101        | Kab. Bolaang Mongondow                                  |                                                         |                        |
| 7102        | Kab. Minahasa                                           |                                                         |                        |
| 7103        | Kab. Sangihe Talaud                                     |                                                         |                        |
| 7104        | Kab. Kepulauan Talaud                                   |                                                         |                        |
| 7105        | Kab. Minahasa Selatan                                   | 7102                                                    | Kab. Minahasa          |
| 7171        | Kota Manado                                             |                                                         |                        |
| 7172        | Kota Bitung                                             |                                                         |                        |
| 7173        | Kota Tomohon                                            | 7102                                                    | Kab. Minahasa          |
| <b>7200</b> | <b>Prov. Sulawesi Tengah</b>                            |                                                         |                        |
| 7201        | Kab. Banggai Kepulauan                                  |                                                         |                        |
| 7202        | Kab. Banggai                                            |                                                         |                        |
| 7203        | Kab. Morowali                                           |                                                         |                        |
| 7204        | Kab. Poso                                               |                                                         |                        |
| 7205        | Kab. Donggala                                           |                                                         |                        |
| 7206        | Kab. Toli-Toli                                          |                                                         |                        |
| 7207        | Kab. Buol                                               |                                                         |                        |
| 7208        | Kab. Parigi Moutong                                     |                                                         |                        |
| 7271        | Kota Palu                                               |                                                         |                        |
| <b>7300</b> | <b>Prov. Sulawesi Selatan</b>                           |                                                         |                        |
| 7301        | Kab. Selayar                                            |                                                         |                        |
| 7302        | Kab. Bulukumba                                          |                                                         |                        |
| 7303        | Kab. Bantaeng                                           |                                                         |                        |
| 7304        | Kab. Jeneponto                                          |                                                         |                        |
| 7305        | Kab. Takalar                                            |                                                         |                        |
| 7306        | Kab. Gowa                                               |                                                         |                        |
| 7307        | Kab. Sinjai                                             |                                                         |                        |
| 7308        | Kab. Maros                                              |                                                         |                        |
| 7309        | Kab. Pangkajene Kepulauan                               |                                                         |                        |
| 7310        | Kab. Barru                                              |                                                         |                        |
| 7311        | Kab. Bone                                               |                                                         |                        |
| 7312        | Kab. Soppeng                                            |                                                         |                        |
| 7313        | Kab. Wajo                                               |                                                         |                        |
| 7314        | Kab. Sidenreng Rappang                                  |                                                         |                        |
| 7315        | Kab. Pinrang                                            |                                                         |                        |
| 7316        | Kab. Enrekang                                           |                                                         |                        |
| 7317        | Kab. Luwu                                               |                                                         |                        |



| 2003 (June) |                                                         | 2002 (December)                                         |                       |
|-------------|---------------------------------------------------------|---------------------------------------------------------|-----------------------|
| Code        | Propinsi/Kabupaten/Kota (Province/Regency/Municipality) | Propinsi/Kabupaten/Kota (Province/Regency/Municipality) |                       |
| 7318        | Kab. Tana Toraja                                        |                                                         |                       |
| 7319        | Kab. Polewali Mamasa                                    |                                                         |                       |
| 7320        | Kab. Majene                                             |                                                         |                       |
| 7321        | Kab. Mamuju                                             |                                                         |                       |
| 7322        | Kab. Luwu Utara                                         |                                                         |                       |
| 7323        | Kab. Mamasa                                             |                                                         |                       |
| 7324        | Kab. Mamuju Utara                                       | 7321                                                    | Kab. Mamuju           |
| 7325        | Kab. Luwu Timur                                         | 7322                                                    | Kab. Luwu Utara       |
| 7371        | Kota Makassar                                           |                                                         |                       |
| 7372        | Kota Pare-Pare                                          |                                                         |                       |
| 7373        | Kota Palopo                                             |                                                         |                       |
| <b>7400</b> | <b>Prov. Sulawesi Tenggara</b>                          |                                                         |                       |
| 7401        | Kab. Buton                                              |                                                         |                       |
| 7402        | Kab. Muna                                               |                                                         |                       |
| 7403        | Kab. Kendari                                            |                                                         |                       |
| 7404        | Kab. Kolaka                                             |                                                         |                       |
| 7405        | Kab. Konawe Selatan                                     | 7403                                                    | Kab. Kendari          |
| 7471        | Kota Kendari                                            |                                                         |                       |
| 7472        | Kota Baubau                                             |                                                         |                       |
| <b>7500</b> | <b>Prov. Gorontalo</b>                                  |                                                         |                       |
| 7501        | Kab. Boalemo                                            |                                                         |                       |
| 7502        | Kab. Gorontalo                                          |                                                         |                       |
| 7503        | Kab. Pohuwato                                           | 7501                                                    | Kab. Boalemo          |
| 7504        | Kab. Bone Bolango                                       | 7502                                                    | Kab. Gorontalo        |
| 7571        | Kota Gorontalo                                          |                                                         |                       |
| <b>8100</b> | <b>Prov. Maluku</b>                                     |                                                         |                       |
| 8101        | Kab. Maluku Tenggara Barat                              |                                                         |                       |
| 8102        | Kab. Maluku Tenggara                                    |                                                         |                       |
| 8103        | Kab. Maluku Tengah                                      |                                                         |                       |
| 8104        | Kab. Buru                                               |                                                         |                       |
| 8171        | Kota Ambon                                              |                                                         |                       |
| <b>8200</b> | <b>Prov. Maluku Utara</b>                               |                                                         |                       |
| 8201        | Kab. Maluku Utara                                       |                                                         |                       |
| 8202        | Kab. Halmahera Tengah                                   |                                                         |                       |
| 8203        | Kab. Kepulauan Sula                                     | 8201                                                    | Kab. Maluku Utara     |
| 8204        | Kab. Halmahera Selatan                                  | 8201                                                    | Kab. Maluku Utara     |
| 8205        | Kab. Halmahera Utara                                    | 8201                                                    | Kab. Maluku Utara     |
| 8206        | Kab. Halmahera Timur                                    | 8202                                                    | Kab. Halmahera Tengah |
| 8271        | Kota Ternate                                            |                                                         |                       |
| 8272        | Kota Tidore Kepulauan                                   | 8202                                                    | Kab. Halmahera Tengah |
| <b>9400</b> | <b>Prov. Papua</b>                                      |                                                         |                       |
| 9401        | Kab. Merauke                                            |                                                         |                       |
| 9402        | Kab. Jayawijaya                                         |                                                         |                       |
| 9403        | Kab. Jayapura                                           |                                                         |                       |
| 9404        | Kab. Nabire                                             |                                                         |                       |
| 9405        | Kab. Fak-Fak                                            |                                                         |                       |
| 9406        | Kab. Sorong                                             |                                                         |                       |
| 9407        | Kab. Manokwari                                          |                                                         |                       |
| 9408        | Kab. Yapen Waropen                                      |                                                         |                       |
| 9409        | Kab. Biak Numfor                                        |                                                         |                       |
| 9410        | Kab. Paniai                                             |                                                         |                       |
| 9411        | Kab. Puncak Jaya                                        |                                                         |                       |
| 9412        | Kab. Mimika                                             |                                                         |                       |
| 9413        | Kab. Boven Digoel                                       |                                                         |                       |





| 2003 (June) |                                                         | 2002 (December)                                         |  |
|-------------|---------------------------------------------------------|---------------------------------------------------------|--|
| Code        | Propinsi/Kabupaten/Kota (Province/Regency/Municipality) | Propinsi/Kabupaten/Kota (Province/Regency/Municipality) |  |
| 9414        | Kab. Mappi                                              |                                                         |  |
| 9415        | Kab. Asmat                                              |                                                         |  |
| 9416        | Kab. Yahukimo                                           |                                                         |  |
| 9417        | Kab. Pegunungan Bintang                                 |                                                         |  |
| 9418        | Kab. Tolikara                                           |                                                         |  |
| 9419        | Kab. Sarmi                                              |                                                         |  |
| 9420        | Kab. Keerom                                             |                                                         |  |
| 9421        | Kab. Kaimana                                            |                                                         |  |
| 9422        | Kab. Sorong Selatan                                     |                                                         |  |
| 9423        | Kab. Raja Ampat                                         |                                                         |  |
| 9424        | Kab. Teluk Bintuni                                      |                                                         |  |
| 9425        | Kab. Teluk Wondama                                      |                                                         |  |
| 9426        | Kab. Waropen                                            |                                                         |  |
| 9471        | Kota Jayapura                                           |                                                         |  |
| 9472        | Kota Sorong                                             |                                                         |  |
