# Supplementary material for: Democratization, leader education and growth: firm-level evidence from Indonesia
Source: Springer Nature journal article supplement (doi:10.1007/s10887-022-09221-5), 2023-02-15
Supplement: MOESM2 [file kbli to isic correspondence.xlsx]

## Sheet: kbli2000 to isic_rev3.1
kbli2000	isic_rev3.1
1511	1511
1512	1512
1513	1513
1514	1514
1521	1520
1531	1531
1532	1531
1533	1533
1541	1541
1542	1542
1543	1543
1544	1544
1549	1549
1549	4030
1551	1551
1552	1552
1553	1553
1554	1554
1600	1600
1711	1711
1712	1712
1721	1721
1722	1722
1723	1723
1729	1729
1730	1730
1740	1711
1810	1810
1820	1820
1911	1911
1912	1912
1920	1920
2010	2010
2021	2021
2022	2022
2023	2023
2029	2029
2101	2101
2102	2102
2109	2109
2211	2211
2212	2212
2213	2213
2214	2211
2219	2219
2221	2221
2222	2222
2230	2230
2310	2310
2320	2320
2330	2330
2411	2411
2412	2412
2413	2413
2421	2421
2422	2422
2423	2423
2424	2424
2429	2429
2429	2422
2430	2430
2511	2511
2512	2519
2519	2519
2520	2520
2611	2610
2612	2610
2620	2691
2631	2693
2632	2693
2641	2694
2642	2695
2650	2691
2660	2699
2690	2699
2710	2710
2720	2720
2731	2731
2732	2732
2811	2811
2812	2812
2891	2891
2892	2892
2893	2893
2899	2899
2911	2911
2912	2912
2913	2913
2914	2914
2915	2915
2919	2919
2921	2921
2922	2922
2923	2923
2924	2924
2925	2925
2926	2926
2927	2927
2929	2929
2930	2930
3000	3000
3110	3110
3120	3120
3130	3130
3140	3140
3150	3150
3190	3190
3210	3210
3220	3220
3230	3230
3311	3311
3312	3312
3313	3313
3320	3320
3330	3330
3410	3410
3420	3420
3430	3430
3511	3511
3512	3512
3520	3520
3530	3530
3591	3591
3592	3592
3599	3599
3610	3610
3691	3691
3692	3692
3693	3693
3694	3694
3699	3699
3710	3710
3720	3720
3892	3699
