# Supplementary material for: Democratization, leader education and growth: firm-level evidence from Indonesia
Source: Springer Nature journal article supplement (doi:10.1007/s10887-022-09221-5), 2023-02-15
Supplement: MOESM2 [file kppod_2002.xlsx]

## Sheet: infra_02
prov_kppod_02	kab_kppod_02	kabID97	av_street_02	av_seaport_02	av_airport_02	av_telserv_02	av_elecserv_02	subtot_avinfra_02	qu_street_02	qu_seaport_02	qu_airport_02	qu_telserv_02	qu_elecserv_02	subtot_quinfra_02	tot_infra_02
SUMATERA UTARA	DELI SERDANG	121000	0.0018	0.0038	0.0017	0.0031	0.0007	0.0111	0.0018	0.0014	0.0015	0.0033	0.0008	0.0088	0.0199
SUMATERA UTARA	LANGKAT	121100	0.0018	0.0033	0.0017	0.0031	0.0007	0.0106	0.0006	0.0014	0.0015	0.0033	0.0008	0.0076	0.0182
SUMATERA UTARA	KOTA SIBOLGA	127100	0.0066	0.0033	0.0006	0.0031	0.0011	0.0147	0.0035	0.0035	0.0007	0.0033	0.0052	0.0162	0.0309
SUMATERA UTARA	ASAHAN	120600	0.004	0.0033	0.0017	0.0031	0.0011	0.0132	0.0003	0.0031	0.0015	0.0033	0.0052	0.0134	0.0266
SUMATERA UTARA	DAIRI	120800	0.0066	0.0033	0.0017	0.0031	0.0011	0.0158	0.0006	0.0014	0.0015	0.0074	0.0052	0.0161	0.0319
SUMATERA UTARA	KOTA PEMATANG SIANTAR	127300	0.0066	0.0033	0.0017	0.0031	0.0007	0.0154	0.0035	0.0014	0.0022	0.0033	0.0008	0.0112	0.0266
SUMATERA UTARA	KOTA MEDAN	127500	0.0066	0.0051	0.0017	0.0071	0.0007	0.0212	0.0035	0.0035	0.0026	0.0033	0.0008	0.0137	0.0349
SUMATERA UTARA	KOTA TANJUNG BALAI	127200	0.0066	0.0033	0.0017	0.0031	0.0011	0.0158	0.0003	0.0014	0.0015	0.0074	0.0022	0.0128	0.0286
SUMATERA UTARA	KOTA TEBING TINGGI	127400	0.0066	0.0033	0.0017	0.0031	0.0011	0.0158	0.0018	0.0014	0.0015	0.0033	0.0008	0.0088	0.0246
SUMATERA UTARA	SIMALUNGUN	120700	0.004	0.0033	0.0017	0.0031	0.0011	0.0132	0.0018	0.0014	0.0015	0.0033	0.0008	0.0088	0.022
SUMATERA UTARA	KOTA BINJAI	127600	0.0066	0.0033	0.0017	0.0031	0.0007	0.0154	0.0018	0.0014	0.0015	0.0033	0.0008	0.0088	0.0242
SUMATERA BARAT	PESISIR SELATAN	130100	0.0009	0.0033	0.0017	0.001	0.0007	0.0076	0.0018	0.0006	0.0007	0.0016	0.0008	0.0055	0.0131
SUMATERA BARAT	KOTA SAWAH LUNTO	130302	0.0066	0.0033	0.0017	0.0005	0.0011	0.0132	0.0035	0.0031	0.0026	0.0033	0.0052	0.0177	0.0309
SUMATERA BARAT	KOTA PADANG	137100	0.004	0.0038	0.0017	0.0044	0.0011	0.015	0.0035	0.0031	0.0026	0.0074	0.0052	0.0218	0.0368
SUMATERA BARAT	SAWAHLUNTO/SIJUNJUNG	130300	0.0009	0.0033	0.0017	0.0044	0.0011	0.0114	0.0018	0.0031	0.0022	0.0033	0.0022	0.0126	0.024
R I A U	INDRAGIRI HILIR	140200	0.0009	0.0033	0.0006	0.0031	0.0007	0.0086	0.0018	0.0014	0.0015	0.0033	0.0022	0.0102	0.0188
R I A U	KOTA BATAM	147200	0.0066	0.0038	0.0017	0.0071	0.0057	0.0249	0.0035	0.0031	0.0026	0.0074	0.0052	0.0218	0.0467
R I A U	BENGKALIS	140500	0.0018	0.0051	0.0017	0.0031	0.0007	0.0124	0.0003	0.0031	0.0015	0.0016	0.0022	0.0087	0.0211
R I A U	KAMPAR	140400	0.0018	0.0033	0.0006	0.0031	0.0007	0.0095	0.0018	0.0014	0.0015	0.0033	0.0022	0.0102	0.0197
R I A U	KOTA PEKAN BARU	147100	0.004	0.0038	0.0017	0.0031	0.0007	0.0133	0.0018	0.0014	0.0026	0.0074	0.0052	0.0184	0.0317
J A M B I	BATANGHARI	150400	0.0009	0.0033	0.0017	0.0031	0.0007	0.0097	0.0018	0.0035	0.0022	0.0074	0.0052	0.0201	0.0298
J A M B I	KERINCI	150100	0.0009	0.0033	0.0017	0.0031	0.0007	0.0097	0.0035	0.0006	0.0015	0.0074	0.0022	0.0152	0.0249
J A M B I	BUNGOTEBO	150200	0.0005	0.0033	0.0017	0.0031	0.0007	0.0093	0.0035	0.0014	0.0015	0.0074	0.0022	0.016	0.0253
SUMATERA SELATAN	OGAN KOMERING ILIR	160200	0.004	0.0033	0.0017	0.0044	0.0057	0.0191	0.0006	0.0014	0.0015	0.0033	0.0022	0.009	0.0281
SUMATERA SELATAN	KOTA PALEMBANG	167100	0.0066	0.0051	0.0017	0.0071	0.0011	0.0216	0.0035	0.0031	0.0026	0.0016	0.0008	0.0116	0.0332
SUMATERA SELATAN	MUARA ENIM	160300	0.0018	0.0033	0.0017	0.0044	0.0029	0.0141	0.0018	0.0031	0.0022	0.0033	0.0022	0.0126	0.0267
SUMATERA SELATAN	MUSI BANYUASIN	160600	0.0066	0.0033	0.0017	0.0071	0.0007	0.0194	0.0003	0.0014	0.0015	0.0033	0.0022	0.0087	0.0281
SUMATERA SELATAN	MUSI RAWAS	160500	0.0066	0.0033	0.0017	0.0031	0.0007	0.0154	0.0003	0.0014	0.0015	0.0033	0.0022	0.0087	0.0241
BANGKA BELITUNG	KOTA PANGKAL PINANG	167200	0.0005	0.0033	0.0017	0.0031	0.0011	0.0097	0.0018	0.0014	0.0022	0.0033	0.0008	0.0095	0.0192
BANGKA BELITUNG	BANGKA	160700	0.0005	0.0033	0.0017	0.0031	0.0011	0.0097	0.0018	0.0014	0.0022	0.0033	0.0008	0.0095	0.0192
BENGKULU	BENGKULU SELATAN	170100	0.0018	0.0033	0.0006	0.0031	0.0007	0.0095	0.0018	0.0006	0.0015	0.0033	0.0022	0.0094	0.0189
BENGKULU	KOTA BENGKULU	177100	0.0066	0.0033	0.0006	0.0031	0.0007	0.0143	0.0018	0.0006	0.0015	0.0033	0.0022	0.0094	0.0237
LAMPUNG	LAMPUNG SELATAN	180101	0.004	0.0033	0.0017	0.001	0.0011	0.0111	0.0018	0.0014	0.0015	0.0016	0.0004	0.0067	0.0178
LAMPUNG	LAMPUNG TIMUR	180200	0.004	0.0033	0.0017	0.0031	0.0011	0.0132	0.0018	0.0014	0.0015	0.0016	0.0004	0.0067	0.0199
LAMPUNG	KOTA BANDAR LAMPUNG	187100	0.004	0.0033	0.0017	0.0044	0.0011	0.0145	0.0018	0.0031	0.0022	0.0074	0.0004	0.0149	0.0294
LAMPUNG	LAMPUNG BARAT	180302	0.0018	0.0033	0.0017	0.001	0.0011	0.0089	0.0018	0.0006	0.0015	0.0033	0.0022	0.0094	0.0183
BANTEN	TANGERANG	321901	0.0066	0.0038	0.0017	0.0071	0.0029	0.0221	0.0035	0.0035	0.0026	0.0074	0.0052	0.0222	0.0443
BANTEN	SERANG	322000	0.004	0.0038	0.0017	0.0071	0.0011	0.0177	0.0018	0.0014	0.0022	0.0074	0.0052	0.018	0.0357
BANTEN	KOTA TANGERANG	321902	0.0066	0.0038	0.0017	0.0071	0.0029	0.0221	0.0035	0.0035	0.0026	0.0074	0.0052	0.0222	0.0443
BANTEN	LEBAK	320200	0.0018	0.0033	0.0017	0.0044	0.0011	0.0123	0.0018	0.0014	0.0022	0.0033	0.0022	0.0109	0.0232
JAWA BARAT	CIAMIS	320900	0.004	0.0033	0.0017	0.0044	0.0057	0.0191	0.0018	0.0014	0.0015	0.0033	0.0022	0.0102	0.0293
JAWA BARAT	SUKABUMI	320400	0.004	0.0033	0.0017	0.0044	0.0029	0.0163	0.0018	0.0014	0.0015	0.0033	0.0022	0.0102	0.0265
JAWA BARAT	KUNINGAN	321000	0.004	0.0033	0.0017	0.0044	0.0057	0.0191	0.0018	0.0014	0.0015	0.0016	0.0008	0.0071	0.0262
JAWA BARAT	GARUT	320700	0.004	0.0033	0.0017	0.0044	0.0057	0.0191	0.0018	0.0014	0.0015	0.0033	0.0008	0.0088	0.0279
JAWA BARAT	CIREBON	321100	0.004	0.0038	0.0017	0.0044	0.0057	0.0196	0.0018	0.0014	0.0015	0.0033	0.0008	0.0088	0.0284
JAWA BARAT	SUMEDANG	321300	0.004	0.0033	0.0017	0.0044	0.0057	0.0191	0.0018	0.0014	0.0015	0.0033	0.0008	0.0088	0.0279
JAWA BARAT	TASIKMALAYA	320800	0.004	0.0033	0.0017	0.0044	0.0057	0.0191	0.0018	0.0014	0.0015	0.0033	0.0022	0.0102	0.0293
JAWA BARAT	KOTA BEKASI	321802	0.0066	0.0038	0.0017	0.0071	0.0057	0.0249	0.0035	0.0031	0.0026	0.0033	0.0022	0.0147	0.0396
JAWA BARAT	KOTA BOGOR	327100	0.0066	0.0038	0.0017	0.0071	0.0057	0.0249	0.0035	0.0031	0.0026	0.0033	0.0022	0.0147	0.0396
JAWA BARAT	KOTA CIREBON	327400	0.0066	0.0038	0.0017	0.0071	0.0057	0.0249	0.0018	0.0014	0.0015	0.0033	0.0022	0.0102	0.0351
JAWA BARAT	BOGOR	320300	0.0066	0.0038	0.0017	0.0071	0.0057	0.0249	0.0035	0.0031	0.0026	0.0033	0.0022	0.0147	0.0396
JAWA BARAT	KOTA SUKABUMI	327200	0.0066	0.0033	0.0017	0.0071	0.0029	0.0216	0.0035	0.0014	0.0015	0.0033	0.0052	0.0149	0.0365
JAWA BARAT	KARAWANG	321700	0.0066	0.0038	0.0017	0.0071	0.0057	0.0249	0.0035	0.0031	0.0026	0.0033	0.0022	0.0147	0.0396
JAWA BARAT	BEKASI	321801	0.0066	0.0038	0.0017	0.0071	0.0057	0.0249	0.0035	0.0031	0.0026	0.0033	0.0022	0.0147	0.0396
JAWA BARAT	INDRAMAYU	321400	0.004	0.0033	0.0017	0.0071	0.0057	0.0218	0.0018	0.0014	0.0015	0.0016	0.0008	0.0071	0.0289
JAWA TENGAH	KOTA SEMARANG	337400	0.0066	0.0051	0.0017	0.0071	0.0029	0.0234	0.0035	0.0035	0.0026	0.0074	0.0052	0.0222	0.0456
JAWA TENGAH	KENDAL	332400	0.0066	0.0038	0.0017	0.0071	0.0057	0.0249	0.0018	0.0014	0.0022	0.0074	0.0052	0.018	0.0429
JAWA TENGAH	PEMALANG	332700	0.0066	0.0033	0.0017	0.0044	0.0011	0.0171	0.0018	0.0014	0.0015	0.0016	0.0052	0.0115	0.0286
JAWA TENGAH	KOTA PEKALONGAN	337500	0.0066	0.0033	0.0017	0.0044	0.0011	0.0171	0.0035	0.0014	0.0015	0.0033	0.0052	0.0149	0.032
JAWA TENGAH	PEKALONGAN	332600	0.0066	0.0033	0.0017	0.0044	0.0057	0.0217	0.0018	0.0014	0.0015	0.0033	0.0052	0.0132	0.0349
JAWA TENGAH	MAGELANG	330800	0.0066	0.0033	0.0017	0.0044	0.0011	0.0171	0.0035	0.0014	0.0015	0.0033	0.0052	0.0149	0.032
JAWA TENGAH	TEGAL	332800	0.0066	0.0038	0.0017	0.0031	0.0011	0.0163	0.0035	0.0014	0.0015	0.0033	0.0052	0.0149	0.0312
JAWA TENGAH	KOTA TEGAL	337600	0.0066	0.0033	0.0017	0.0044	0.0011	0.0171	0.0018	0.0031	0.0015	0.0074	0.0052	0.019	0.0361
JAWA TENGAH	SUKOHARJO	331100	0.0066	0.0033	0.0017	0.0071	0.0029	0.0216	0.0018	0.0014	0.0026	0.0074	0.0052	0.0184	0.04
D.I. YOGYAKARTA	KOTA YOGYAKARTA	347100	0.0066	0.0033	0.0017	0.0071	0.0029	0.0216	0.0035	0.0014	0.0026	0.0074	0.0052	0.0201	0.0417
JAWA TIMUR	BANGKALAN	352600	0.004	0.0033	0.0017	0.0071	0.0011	0.0172	0.0035	0.0014	0.0015	0.0016	0.0008	0.0088	0.026
JAWA TIMUR	PAMEKASAN	352800	0.004	0.0033	0.0017	0.0071	0.0011	0.0172	0.0035	0.0014	0.0015	0.0016	0.0008	0.0088	0.026
JAWA TIMUR	KOTA MALANG	357300	0.0066	0.0038	0.0017	0.0071	0.0011	0.0203	0.0035	0.0014	0.0022	0.0016	0.0008	0.0095	0.0298
JAWA TIMUR	SIDOARJO	351500	0.0066	0.0038	0.0017	0.0071	0.0029	0.0221	0.0035	0.0031	0.0026	0.0074	0.0052	0.0218	0.0439
JAWA TIMUR	KOTA SURABAYA	357800	0.0066	0.0051	0.0017	0.0071	0.0029	0.0234	0.0035	0.0035	0.0026	0.0074	0.0052	0.0222	0.0456
JAWA TIMUR	PASURUAN	351400	0.004	0.0033	0.0017	0.0071	0.0029	0.019	0.0035	0.0035	0.0022	0.0074	0.0052	0.0218	0.0408
JAWA TIMUR	MOJOKERTO	351600	0.004	0.0033	0.0017	0.0071	0.0029	0.019	0.0035	0.0014	0.0015	0.0016	0.0008	0.0088	0.0278
JAWA TIMUR	KOTA KEDIRI	357100	0.0066	0.0033	0.0017	0.0071	0.0011	0.0198	0.0035	0.0014	0.0015	0.0033	0.0052	0.0149	0.0347
JAWA TIMUR	KEDIRI	350600	0.004	0.0033	0.0017	0.0071	0.0011	0.0172	0.0035	0.0014	0.0015	0.0016	0.0008	0.0088	0.026
JAWA TIMUR	KOTA MOJOKERTO	357600	0.0018	0.0033	0.0017	0.0071	0.0011	0.015	0.0035	0.0014	0.0015	0.0016	0.0008	0.0088	0.0238
JAWA TIMUR	BLITAR	350500	0.004	0.0033	0.0017	0.0071	0.0011	0.0172	0.0035	0.0014	0.0015	0.0016	0.0008	0.0088	0.026
JAWA TIMUR	KOTA PROBOLINGGO	357400	0.0018	0.0033	0.0017	0.0071	0.0011	0.015	0.0035	0.0031	0.0022	0.0016	0.0008	0.0112	0.0262
JAWA TIMUR	MAGETAN	352000	0.004	0.0033	0.0017	0.0071	0.0011	0.0172	0.0035	0.0014	0.0015	0.0016	0.0008	0.0088	0.026
JAWA TIMUR	BANYUWANGI	351000	0.004	0.0038	0.0017	0.0071	0.0011	0.0177	0.0035	0.0031	0.0015	0.0016	0.0008	0.0105	0.0282
BALI	GIANYAR	510400	0.0066	0.0033	0.0017	0.0044	0.0029	0.0189	0.0035	0.0014	0.0026	0.0033	0.0022	0.013	0.0319
BALI	BADUNG	510301	0.0066	0.0038	0.0017	0.0044	0.0029	0.0194	0.0035	0.0014	0.0026	0.0074	0.0052	0.0201	0.0395
BALI	KOTA DENPASAR	510302	0.0066	0.0038	0.0017	0.0044	0.0029	0.0194	0.0035	0.0031	0.0026	0.0074	0.0022	0.0188	0.0382
BALI	TABANAN	510200	0.0066	0.0033	0.0017	0.0044	0.0011	0.0171	0.0035	0.0014	0.0026	0.0033	0.0022	0.013	0.0301
BALI	JEMBRANA	510100	0.0066	0.0038	0.0017	0.0031	0.0011	0.0163	0.0035	0.0014	0.0026	0.0033	0.0022	0.013	0.0293
BALI	BULELENG	510800	0.0066	0.0033	0.0017	0.0031	0.0011	0.0158	0.0035	0.0014	0.0026	0.0016	0.0022	0.0113	0.0271
BALI	BANGLI	510600	0.0066	0.0033	0.0017	0.0044	0.0011	0.0171	0.0035	0.0014	0.0026	0.0016	0.0022	0.0113	0.0284
KALIMANTAN BARAT	SAMBAS	610100	0.0009	0.0033	0.0006	0.0031	0.0011	0.009	0.0003	0.0014	0.0015	0.0074	0.0008	0.0114	0.0204
KALIMANTAN BARAT	KAPUAS HULU	610600	0.0005	0.0033	0.0006	0.0005	0.0007	0.0056	0.0003	0.0003	0.0026	0.0033	0.0008	0.0073	0.0129
KALIMANTAN BARAT	KETAPANG	610400	0.0009	0.0033	0.0017	0.0005	0.0007	0.0071	0.0006	0.0014	0.0007	0.0016	0.0008	0.0051	0.0122
KALIMANTAN BARAT	SANGGAU	610300	0.0009	0.0013	0.0003	0.0005	0.0007	0.0037	0.0018	0.0006	0.0003	0.0016	0.0008	0.0051	0.0088
KALIMANTAN BARAT	PONTIANAK	610200	0.0066	0.0038	0.0017	0.0031	0.0011	0.0163	0.0018	0.0031	0.0015	0.0033	0.0022	0.0119	0.0282
KALIMANTAN TENGAH	BARITO UTARA	620500	0.0005	0.0013	0.0003	0.0005	0.0007	0.0033	0.0018	0.0031	0.0015	0.0033	0.0008	0.0105	0.0138
KALIMANTAN TENGAH	BARITO SELATAN	620400	0.0009	0.0013	0.0017	0.0031	0.0007	0.0077	0.0018	0.0003	0.0003	0.0033	0.0052	0.0109	0.0186
KALIMANTAN TENGAH	KAPUAS	620300	0.0009	0.0013	0.0017	0.0044	0.0007	0.009	0.0003	0.0003	0.0022	0.0074	0.0052	0.0154	0.0244
KALIMANTAN SELATAN	HULU SUNGAI SELATAN	630600	0.0009	0.0033	0.0017	0.001	0.0011	0.008	0.0006	0.0014	0.0003	0.0033	0.0022	0.0078	0.0158
KALIMANTAN SELATAN	TAPIN	630500	0.0009	0.0033	0.0017	0.001	0.0011	0.008	0.0006	0.0014	0.0015	0.0033	0.0022	0.009	0.017
KALIMANTAN SELATAN	TABALONG	630900	0.0009	0.0033	0.0017	0.001	0.0011	0.008	0.0006	0.0014	0.0015	0.0033	0.0022	0.009	0.017
KALIMANTAN SELATAN	HULU SUNGAI UTARA	630800	0.0009	0.0033	0.0017	0.001	0.0011	0.008	0.0006	0.0014	0.0015	0.0033	0.0022	0.009	0.017
KALIMANTAN SELATAN	HULU SUNGAI TENGAH	630700	0.0009	0.0033	0.0017	0.001	0.0011	0.008	0.0006	0.0014	0.0015	0.0033	0.0022	0.009	0.017
KALIMANTAN SELATAN	TANAH LAUT	630100	0.0009	0.0033	0.0017	0.001	0.0011	0.008	0.0006	0.0031	0.0015	0.0033	0.0008	0.0093	0.0173
KALIMANTAN TIMUR	KOTA BALIKPAPAN	647100	0.0066	0.0038	0.0017	0.0044	0.0011	0.0176	0.0035	0.0031	0.0026	0.0074	0.0022	0.0188	0.0364
KALIMANTAN TIMUR	BERAU	640300	0.0009	0.0038	0.0017	0.001	0.0011	0.0085	0.0018	0.0014	0.0022	0.0033	0.0022	0.0109	0.0194
KALIMANTAN TIMUR	KUTAI	640200	0.004	0.0038	0.0017	0.0031	0.0011	0.0137	0.0018	0.0014	0.0015	0.0016	0.0022	0.0085	0.0222
KALIMANTAN TIMUR	KOTA SAMARINDA	647200	0.0066	0.0038	0.0017	0.0044	0.0011	0.0176	0.0035	0.0014	0.0015	0.0074	0.0022	0.016	0.0336
KALIMANTAN TIMUR	PASIR	640100	0.0009	0.0051	0.0017	0.001	0.0011	0.0098	0.0018	0.0006	0.0007	0.0033	0.0008	0.0072	0.017
SULAWESI UTARA	KOTA MANADO	717200	0.004	0.0051	0.0017	0.0044	0.0007	0.0159	0.0018	0.0035	0.0026	0.0016	0.0022	0.0117	0.0276
SULAWESI UTARA	KOTA BITUNG	710302	0.0009	0.0038	0.0017	0.001	0.0007	0.0081	0.0035	0.0031	0.0022	0.0074	0.0008	0.017	0.0251
SULAWESI UTARA	MINAHASA	710300	0.0018	0.0033	0.0017	0.001	0.0007	0.0085	0.0018	0.0014	0.0015	0.0074	0.0008	0.0129	0.0214
SULAWESI UTARA	SANGIHE TALAUD	710400	0.0018	0.0033	0.0017	0.0005	0.0007	0.008	0.0003	0.0006	0.0007	0.0074	0.0008	0.0098	0.0178
GORONTALO	GORONTALO	710100	0.0018	0.0038	0.0017	0.0031	0.0007	0.0111	0.0018	0.0014	0.0015	0.0033	0.0008	0.0088	0.0199
GORONTALO	KOTA GORONTALO	717100	0.0018	0.0038	0.0017	0.0044	0.0007	0.0124	0.0035	0.0014	0.0015	0.0033	0.0022	0.0119	0.0243
SULAWESI TENGAH	POSO	720200	0.0009	0.0033	0.0003	0.0031	0.0011	0.0087	0.0006	0.0014	0.0015	0.0033	0.0022	0.009	0.0177
SULAWESI TENGAH	BANGGAI	720100	0.0009	0.0033	0.0006	0.0031	0.0029	0.0108	0.0006	0.0014	0.0022	0.0074	0.0022	0.0138	0.0246
SULAWESI TENGAH	TOLI TOLI	720400	0.0009	0.0013	0.0003	0.0005	0.0007	0.0037	0.0006	0.0014	0.0022	0.0074	0.0022	0.0138	0.0175
SULAWESI TENGAH	DONGGALA	720300	0.0009	0.0038	0.0017	0.0031	0.0007	0.0102	0.0006	0.0014	0.0022	0.0074	0.0022	0.0138	0.024
SULAWESI TENGAH	MOROWALI	720200	0.0009	0.0033	0.0006	0.0044	0.0007	0.0099	0.0006	0.0014	0.0003	0.0074	0.0022	0.0119	0.0218
SULAWESI TENGGARA	KOLAKA	740400	0.0009	0.0033	0.0006	0.0031	0.0007	0.0086	0.0006	0.0014	0.0015	0.0033	0.0022	0.009	0.0176
SULAWESI TENGGARA	BUTON	740100	0.0009	0.0033	0.0006	0.0031	0.0007	0.0086	0.0018	0.0006	0.0007	0.0033	0.0022	0.0086	0.0172
SULAWESI SELATAN	KOTA PARE-PARE	737200	0.004	0.0033	0.0017	0.0005	0.0007	0.0102	0.0018	0.0035	0.0015	0.0033	0.0052	0.0153	0.0255
SULAWESI SELATAN	PANGKAJENE KEPULAUAN	730900	0.0009	0.0038	0.0017	0.0031	0.0007	0.0102	0.0006	0.0014	0.0003	0.0033	0.0022	0.0078	0.018
SULAWESI SELATAN	PINRANG	731500	0.0018	0.0033	0.0017	0.0031	0.0007	0.0106	0.0018	0.0014	0.0022	0.0033	0.0052	0.0139	0.0245
SULAWESI SELATAN	TANA TORAJA	731800	0.0009	0.0033	0.0017	0.0031	0.0007	0.0097	0.0006	0.0003	0.0022	0.0033	0.0022	0.0086	0.0183
SULAWESI SELATAN	MAJENE	732000	0.0009	0.0013	0.0017	0.0005	0.0007	0.0051	0.0006	0.0031	0.0003	0.0033	0.0022	0.0095	0.0146
SULAWESI SELATAN	LUWU	731700	0.0009	0.0033	0.0017	0.0031	0.0007	0.0097	0.0006	0.0031	0.0003	0.0033	0.0022	0.0095	0.0192
NUSA TENGGARA BARAT	LOMBOK BARAT	520101	0.0066	0.0033	0.0006	0.0044	0.0007	0.0156	0.0018	0.0014	0.0015	0.0033	0.0008	0.0088	0.0244
NUSA TENGGARA BARAT	BIMA	520600	0.0018	0.0013	0.0006	0.0005	0.0007	0.0049	0.0006	0.0014	0.0015	0.0033	0.0008	0.0076	0.0125
NUSA TENGGARA BARAT	KOTA MATARAM	520102	0.004	0.0033	0.0017	0.0031	0.0007	0.0128	0.0035	0.0014	0.0022	0.0033	0.0008	0.0112	0.024
NUSA TENGGARA TIMUR	ENDE	531000	0.004	0.0013	0.0003	0.0005	0.0007	0.0068	0.0018	0.0014	0.0022	0.0016	0.0052	0.0122	0.019
NUSA TENGGARA TIMUR	FLORES TIMUR	530800	0.0018	0.0033	0.0003	0.0005	0.0007	0.0066	0.0018	0.0014	0.0022	0.0016	0.0052	0.0122	0.0188
NUSA TENGGARA TIMUR	KOTA KUPANG	530302	0.004	0.0033	0.0017	0.0031	0.0007	0.0128	0.0035	0.0031	0.0015	0.0033	0.0022	0.0136	0.0264
NUSA TENGGARA TIMUR	TIMOR TENGAH UTARA	530500	0.0018	0.0013	0.0003	0.0005	0.0007	0.0046	0.0018	0.0031	0.0015	0.0033	0.0022	0.0119	0.0165
NUSA TENGGARA TIMUR	TIMOR TENGAH SELATAN	530400	0.004	0.0033	0.0003	0.0005	0.0007	0.0088	0.0018	0.0014	0.0022	0.0033	0.0008	0.0095	0.0183
PAPUA	FAKFAK	820500	0.0005	0.0013	0.0003	0.0005	0.0007	0.0033	0.0003	0.0031	0.0022	0.0016	0.0022	0.0094	0.0127
PAPUA	MANOKWARI	820700	0.0009	0.0033	0.0017	0.0005	0.0007	0.0071	0.0003	0.0031	0.0015	0.0016	0.0022	0.0087	0.0158

## Sheet: inst_02
prov_kppod_02	kab_kppod_02	kabID97	serv_proc_02	abuse_auth_02	subtot_appserv_02	retrib_tax_02	devbudget_apdb_02	subtot_regfin_02	reg_cons_02	law_enforce_02	illegal_levy_02	exec_leg_02	subtot_lawcert_02	rpolreg_02	tot_inst_02
SUMATERA UTARA	DELI SERDANG	121000	0.0031	0.0015	0.0046	0.0083	0.0014	0.0097	0.0024	0.0034	0.0012	0.003	0.01	0.0046	0.0289
SUMATERA UTARA	LANGKAT	121100	0.0031	0.0015	0.0046	0.0083	0.0023	0.0106	0.0024	0.0034	0.0012	0.003	0.01	0.0046	0.0298
SUMATERA UTARA	SIMALUNGUN	120700	0.0062	0.0015	0.0077	0.0083	0.0023	0.0106	0.0024	0.007	0.0012	0.003	0.0136	0.0046	0.0365
SUMATERA UTARA	KOTA TEBING TINGGI	127400	0.0062	0.003	0.0092	0.0083	0.0023	0.0106	0.0054	0.0034	0.0025	0.003	0.0143	0.0046	0.0387
SUMATERA UTARA	KOTA TANJUNG BALAI	127200	0.0062	0.003	0.0092	0.0051	0.0059	0.011	0.0054	0.0034	0.0025	0.003	0.0143	0.0046	0.0391
SUMATERA UTARA	KOTA BINJAI	127600	0.0062	0.0015	0.0077	0.0051	0.0023	0.0074	0.0054	0.0034	0.0025	0.003	0.0143	0.0147	0.0441
SUMATERA UTARA	KOTA MEDAN	127500	0.0062	0.0015	0.0077	0.0083	0.0014	0.0097	0.0054	0.0034	0.0025	0.003	0.0143	0.0147	0.0464
SUMATERA UTARA	KOTA PEMATANG SIANTAR	127300	0.0062	0.0015	0.0077	0.0051	0.0023	0.0074	0.0054	0.007	0.0025	0.003	0.0179	0.0147	0.0477
SUMATERA UTARA	KOTA SIBOLGA	127100	0.0062	0.0015	0.0077	0.002	0.0037	0.0057	0.0054	0.0034	0.0051	0.0072	0.0211	0.0147	0.0492
SUMATERA UTARA	ASAHAN	120600	0.0062	0.0015	0.0077	0.0132	0.0023	0.0155	0.0054	0.0151	0.0012	0.003	0.0247	0.0046	0.0525
SUMATERA UTARA	DAIRI	120800	0.0248	0.003	0.0278	0.0031	0.0023	0.0054	0.0165	0.0251	0.0051	0.0043	0.051	0.0147	0.0989
SUMATERA BARAT	PESISIR SELATAN	130100	0.0031	0.0015	0.0046	0.002	0.0023	0.0043	0.0012	0.0034	0.0012	0.0015	0.0073	0.0046	0.0208
SUMATERA BARAT	KOTA PADANG	137100	0.0031	0.003	0.0061	0.0083	0.0009	0.0092	0.0024	0.007	0.0012	0.0015	0.0121	0.0147	0.0421
SUMATERA BARAT	SAWAHLUNTO/SIJUNJUNG	130300	0.0062	0.0015	0.0077	0.0051	0.0023	0.0074	0.0024	0.007	0.0012	0.003	0.0136	0.0147	0.0434
SUMATERA BARAT	KOTA SAWAH LUNTO	130302	0.0126	0.0008	0.0134	0.0031	0.0023	0.0054	0.0165	0.0251	0.0099	0.0072	0.0587	0.0147	0.0922
R I A U	KOTA BATAM	147200	0.0126	0.003	0.0156	0.0083	0.0059	0.0142	0.0095	0.007	0.0025	0.0043	0.0233	0.0046	0.0577
R I A U	KAMPAR	140400	0.0062	0.003	0.0092	0.0051	0.0059	0.011	0.0095	0.0151	0.0025	0.0043	0.0314	0.0147	0.0663
R I A U	KOTA PEKAN BARU	147100	0.0126	0.003	0.0156	0.0051	0.0023	0.0074	0.0095	0.0151	0.0025	0.0043	0.0314	0.0147	0.0691
R I A U	INDRAGIRI HILIR	140200	0.0062	0.003	0.0092	0.002	0.0059	0.0079	0.0095	0.0151	0.0025	0.0043	0.0314	0.0217	0.0702
R I A U	BENGKALIS	140500	0.0062	0.003	0.0092	0.0132	0.0059	0.0191	0.0095	0.0151	0.0025	0.0043	0.0314	0.0147	0.0744
J A M B I	BUNGOTEBO	150200	0.0248	0.0061	0.0309	0.002	0.0059	0.0079	0.0095	0.0151	0.0025	0.0043	0.0314	0.0046	0.0748
J A M B I	KERINCI	150100	0.0248	0.0061	0.0309	0.0051	0.0023	0.0074	0.0095	0.0151	0.0025	0.0043	0.0314	0.0147	0.0844
J A M B I	BATANGHARI	150400	0.0248	0.0061	0.0309	0.002	0.0059	0.0079	0.0095	0.0151	0.0025	0.0043	0.0314	0.0217	0.0919
SUMATERA SELATAN	OGAN KOMERING ILIR	160200	0.0031	0.003	0.0061	0.0051	0.0037	0.0088	0.0054	0.0034	0.0025	0.003	0.0143	0.0046	0.0338
SUMATERA SELATAN	MUSI RAWAS	160500	0.0031	0.003	0.0061	0.0031	0.0037	0.0068	0.0054	0.0034	0.0025	0.003	0.0143	0.0217	0.0489
SUMATERA SELATAN	KOTA PALEMBANG	167100	0.0062	0.003	0.0092	0.0083	0.0023	0.0106	0.0054	0.007	0.0025	0.0043	0.0192	0.0147	0.0537
SUMATERA SELATAN	MUARA ENIM	160300	0.0062	0.0015	0.0077	0.0132	0.0023	0.0155	0.0095	0.007	0.0051	0.0043	0.0259	0.0046	0.0537
SUMATERA SELATAN	MUSI BANYUASIN	160600	0.0031	0.003	0.0061	0.0132	0.0059	0.0191	0.0054	0.007	0.0025	0.003	0.0179	0.0147	0.0578
BANGKA BELITUNG	KOTA PANGKAL PINANG	167200	0.0062	0.003	0.0092	0.0031	0.0023	0.0054	0.0024	0.0034	0.0012	0.003	0.01	0.0046	0.0292
BANGKA BELITUNG	BANGKA	160700	0.0062	0.003	0.0092	0.0083	0.0037	0.012	0.0024	0.0034	0.0012	0.003	0.01	0.0147	0.0459
BENGKULU	BENGKULU SELATAN	170100	0.0062	0.003	0.0092	0.0051	0.0014	0.0065	0.0054	0.007	0.0025	0.003	0.0179	0.0046	0.0382
BENGKULU	KOTA BENGKULU	177100	0.0062	0.003	0.0092	0.0051	0.0014	0.0065	0.0054	0.007	0.0025	0.003	0.0179	0.0147	0.0483
LAMPUNG	LAMPUNG TIMUR	180200	0.0031	0.0015	0.0046	0.0051	0.0009	0.006	0.0024	0.0034	0.0012	0.0015	0.0085	0.0046	0.0237
LAMPUNG	LAMPUNG SELATAN	180101	0.0062	0.003	0.0092	0.0051	0.0014	0.0065	0.0024	0.007	0.0006	0.0015	0.0115	0.0046	0.0318
LAMPUNG	KOTA BANDAR LAMPUNG	187100	0.0062	0.003	0.0092	0.0083	0.0014	0.0097	0.0024	0.007	0.0012	0.0015	0.0121	0.0147	0.0457
LAMPUNG	LAMPUNG BARAT	180302	0.0062	0.0008	0.007	0.0051	0.0037	0.0088	0.0095	0.0251	0.0051	0.0015	0.0412	0.0147	0.0717
BANTEN	SERANG	322000	0.0062	0.0008	0.007	0.0051	0.0014	0.0065	0.0024	0.0034	0.0025	0.0072	0.0155	0.0147	0.0437
BANTEN	LEBAK	320200	0.0031	0.003	0.0061	0.002	0.0023	0.0043	0.0054	0.007	0.0051	0.0015	0.019	0.0147	0.0441
BANTEN	KOTA TANGERANG	321902	0.0062	0.003	0.0092	0.0083	0.0037	0.012	0.0054	0.007	0.0025	0.0043	0.0192	0.0147	0.0551
BANTEN	TANGERANG	321901	0.0062	0.0015	0.0077	0.0083	0.0023	0.0106	0.0054	0.007	0.0025	0.0043	0.0192	0.0217	0.0592
JAWA BARAT	CIREBON	321100	0.0062	0.0015	0.0077	0.0051	0.0023	0.0074	0.0054	0.007	0.0025	0.003	0.0179	0.0046	0.0376
JAWA BARAT	KOTA CIREBON	327400	0.0062	0.0015	0.0077	0.0051	0.0023	0.0074	0.0054	0.007	0.0025	0.003	0.0179	0.0046	0.0376
JAWA BARAT	KARAWANG	321700	0.0062	0.0015	0.0077	0.0051	0.0023	0.0074	0.0054	0.007	0.0025	0.003	0.0179	0.0046	0.0376
JAWA BARAT	SUKABUMI	320400	0.0031	0.0015	0.0046	0.0083	0.0023	0.0106	0.0054	0.007	0.0025	0.003	0.0179	0.0046	0.0377
JAWA BARAT	SUMEDANG	321300	0.0062	0.0015	0.0077	0.0051	0.0009	0.006	0.0095	0.007	0.0025	0.003	0.022	0.0046	0.0403
JAWA BARAT	INDRAMAYU	321400	0.0062	0.0015	0.0077	0.0083	0.0023	0.0106	0.0054	0.007	0.0025	0.003	0.0179	0.0046	0.0408
JAWA BARAT	BOGOR	320300	0.0062	0.003	0.0092	0.0083	0.0023	0.0106	0.0054	0.007	0.0025	0.003	0.0179	0.0046	0.0423
JAWA BARAT	CIAMIS	320900	0.0062	0.0015	0.0077	0.002	0.0009	0.0029	0.0054	0.007	0.0025	0.003	0.0179	0.0147	0.0432
JAWA BARAT	GARUT	320700	0.0031	0.0015	0.0046	0.0051	0.0009	0.006	0.0054	0.007	0.0025	0.003	0.0179	0.0147	0.0432
JAWA BARAT	BEKASI	321801	0.0062	0.003	0.0092	0.0083	0.0037	0.012	0.0054	0.007	0.0025	0.003	0.0179	0.0046	0.0437
JAWA BARAT	TASIKMALAYA	320800	0.0062	0.0015	0.0077	0.0031	0.0009	0.004	0.0054	0.007	0.0025	0.003	0.0179	0.0147	0.0443
JAWA BARAT	KOTA BOGOR	327100	0.0126	0.003	0.0156	0.0083	0.0023	0.0106	0.0054	0.007	0.0025	0.003	0.0179	0.0046	0.0487
JAWA BARAT	KOTA SUKABUMI	327200	0.0062	0.0015	0.0077	0.002	0.0023	0.0043	0.0095	0.007	0.0025	0.0043	0.0233	0.0147	0.05
JAWA BARAT	KUNINGAN	321000	0.0062	0.0015	0.0077	0.002	0.0009	0.0029	0.0054	0.007	0.0025	0.003	0.0179	0.0217	0.0502
JAWA BARAT	KOTA BEKASI	321802	0.0126	0.003	0.0156	0.0051	0.0037	0.0088	0.0054	0.007	0.0025	0.003	0.0179	0.0217	0.064
JAWA TENGAH	SUKOHARJO	331100	0.0062	0.003	0.0092	0.0083	0.0009	0.0092	0.0054	0.007	0.0051	0.0043	0.0218	0.0046	0.0448
JAWA TENGAH	MAGELANG	330800	0.0062	0.0061	0.0123	0.0083	0.0023	0.0106	0.0095	0.0151	0.0051	0.0043	0.034	0.0046	0.0615
JAWA TENGAH	TEGAL	332800	0.0062	0.0061	0.0123	0.0031	0.0023	0.0054	0.0095	0.0151	0.0025	0.0043	0.0314	0.0147	0.0638
JAWA TENGAH	PEKALONGAN	332600	0.0062	0.0061	0.0123	0.0051	0.0009	0.006	0.0095	0.0151	0.0025	0.0043	0.0314	0.0147	0.0644
JAWA TENGAH	KOTA PEKALONGAN	337500	0.0062	0.0061	0.0123	0.0083	0.0023	0.0106	0.0095	0.0151	0.0025	0.0043	0.0314	0.0147	0.069
JAWA TENGAH	KOTA TEGAL	337600	0.0126	0.0061	0.0187	0.002	0.0037	0.0057	0.0095	0.0151	0.0051	0.0043	0.034	0.0147	0.0731
JAWA TENGAH	KOTA SEMARANG	337400	0.0126	0.003	0.0156	0.0083	0.0059	0.0142	0.0054	0.007	0.0051	0.0043	0.0218	0.0217	0.0733
JAWA TENGAH	KENDAL	332400	0.0126	0.0015	0.0141	0.0051	0.0009	0.006	0.0165	0.0251	0.0051	0.0043	0.051	0.0046	0.0757
JAWA TENGAH	PEMALANG	332700	0.0126	0.0061	0.0187	0.0051	0.0009	0.006	0.0165	0.0151	0.0051	0.0043	0.041	0.0147	0.0804
D.I. YOGYAKARTA	KOTA YOGYAKARTA	347100	0.0062	0.003	0.0092	0.0083	0.0009	0.0092	0.0054	0.0034	0.0025	0.003	0.0143	0.0217	0.0544
JAWA TIMUR	KOTA PROBOLINGGO	357400	0.0031	0.0015	0.0046	0.0031	0.0023	0.0054	0.0054	0.007	0.0012	0.003	0.0166	0.0046	0.0312
JAWA TIMUR	BLITAR	350500	0.0062	0.003	0.0092	0.0051	0.0009	0.006	0.0054	0.007	0.0012	0.003	0.0166	0.0046	0.0364
JAWA TIMUR	MAGETAN	352000	0.0062	0.003	0.0092	0.0051	0.0014	0.0065	0.0054	0.007	0.0012	0.003	0.0166	0.0046	0.0369
JAWA TIMUR	MOJOKERTO	351600	0.0031	0.0015	0.0046	0.0083	0.0014	0.0097	0.0095	0.007	0.0012	0.003	0.0207	0.0046	0.0396
JAWA TIMUR	KOTA SURABAYA	357800	0.0031	0.0061	0.0092	0.0083	0.0023	0.0106	0.0054	0.007	0.0025	0.0007	0.0156	0.0046	0.04
JAWA TIMUR	PAMEKASAN	352800	0.0031	0.0015	0.0046	0.0031	0.0014	0.0045	0.0054	0.007	0.0012	0.003	0.0166	0.0147	0.0404
JAWA TIMUR	BANYUWANGI	351000	0.0031	0.0015	0.0046	0.0051	0.0014	0.0065	0.0054	0.007	0.0012	0.003	0.0166	0.0147	0.0424
JAWA TIMUR	BANGKALAN	352600	0.0031	0.0015	0.0046	0.0051	0.0014	0.0065	0.0054	0.007	0.0012	0.003	0.0166	0.0147	0.0424
JAWA TIMUR	KOTA KEDIRI	357100	0.0031	0.0015	0.0046	0.0083	0.0014	0.0097	0.0095	0.007	0.0051	0.0043	0.0259	0.0046	0.0448
JAWA TIMUR	KOTA MOJOKERTO	357600	0.0062	0.0015	0.0077	0.0051	0.0023	0.0074	0.0054	0.007	0.0012	0.003	0.0166	0.0147	0.0464
JAWA TIMUR	KEDIRI	350600	0.0031	0.003	0.0061	0.0051	0.0014	0.0065	0.0095	0.007	0.0012	0.003	0.0207	0.0147	0.048
JAWA TIMUR	KOTA MALANG	357300	0.0031	0.003	0.0061	0.0083	0.0014	0.0097	0.0095	0.007	0.0012	0.003	0.0207	0.0217	0.0582
JAWA TIMUR	PASURUAN	351400	0.0062	0.012	0.0182	0.0083	0.0023	0.0106	0.0054	0.007	0.0025	0.003	0.0179	0.0147	0.0614
JAWA TIMUR	SIDOARJO	351500	0.0126	0.0008	0.0134	0.0051	0.0023	0.0074	0.0095	0.0151	0.0025	0.003	0.0301	0.0217	0.0726
BALI	BANGLI	510600	0.0062	0.003	0.0092	0.0051	0.0023	0.0074	0.0054	0.007	0.0025	0.003	0.0179	0.0147	0.0492
BALI	BULELENG	510800	0.0062	0.003	0.0092	0.0083	0.0014	0.0097	0.0054	0.007	0.0025	0.0015	0.0164	0.0147	0.05
BALI	JEMBRANA	510100	0.0062	0.003	0.0092	0.0051	0.0009	0.006	0.0054	0.007	0.0025	0.003	0.0179	0.0217	0.0548
BALI	TABANAN	510200	0.0062	0.003	0.0092	0.0051	0.0023	0.0074	0.0054	0.007	0.0025	0.003	0.0179	0.0217	0.0562
BALI	KOTA DENPASAR	510302	0.0126	0.0015	0.0141	0.0083	0.0023	0.0106	0.0054	0.007	0.0051	0.0015	0.019	0.0147	0.0584
BALI	BADUNG	510301	0.0126	0.003	0.0156	0.0132	0.0059	0.0191	0.0024	0.007	0.0012	0.003	0.0136	0.0147	0.063
BALI	GIANYAR	510400	0.0248	0.003	0.0278	0.0083	0.0037	0.012	0.0054	0.007	0.0025	0.003	0.0179	0.0147	0.0724
KALIMANTAN BARAT	KAPUAS HULU	610600	0.0031	0.0015	0.0046	0.002	0.0037	0.0057	0.0054	0.007	0.0051	0.0015	0.019	0.0046	0.0339
KALIMANTAN BARAT	PONTIANAK	610200	0.0031	0.0015	0.0046	0.0083	0.0014	0.0097	0.0054	0.007	0.0051	0.003	0.0205	0.0046	0.0394
KALIMANTAN BARAT	SANGGAU	610300	0.0062	0.003	0.0092	0.0051	0.0023	0.0074	0.0054	0.007	0.0051	0.0043	0.0218	0.0046	0.043
KALIMANTAN BARAT	KETAPANG	610400	0.0062	0.003	0.0092	0.0051	0.0059	0.011	0.0054	0.007	0.0051	0.0043	0.0218	0.0046	0.0466
KALIMANTAN BARAT	SAMBAS	610100	0.0062	0.003	0.0092	0.0051	0.0023	0.0074	0.0024	0.007	0.0051	0.0043	0.0188	0.0147	0.0501
KALIMANTAN TENGAH	KAPUAS	620300	0.0062	0.003	0.0092	0.0051	0.0023	0.0074	0.0095	0.0151	0.0006	0.003	0.0282	0.0046	0.0494
KALIMANTAN TENGAH	BARITO SELATAN	620400	0.0062	0.0015	0.0077	0.0051	0.0023	0.0074	0.0095	0.0151	0.0006	0.003	0.0282	0.0147	0.058
KALIMANTAN TENGAH	BARITO UTARA	620500	0.0062	0.0015	0.0077	0.0051	0.0059	0.011	0.0054	0.007	0.0099	0.003	0.0253	0.0147	0.0587
KALIMANTAN SELATAN	TAPIN	630500	0.0031	0.003	0.0061	0.0083	0.0014	0.0097	0.0054	0.007	0.0025	0.003	0.0179	0.0046	0.0383
KALIMANTAN SELATAN	HULU SUNGAI SELATAN	630600	0.0062	0.003	0.0092	0.002	0.0023	0.0043	0.0054	0.007	0.0025	0.0043	0.0192	0.0147	0.0474
KALIMANTAN SELATAN	HULU SUNGAI UTARA	630800	0.0062	0.003	0.0092	0.0051	0.0023	0.0074	0.0054	0.007	0.0025	0.0043	0.0192	0.0147	0.0505
KALIMANTAN SELATAN	TANAH LAUT	630100	0.0062	0.003	0.0092	0.0051	0.0023	0.0074	0.0054	0.007	0.0025	0.0043	0.0192	0.0147	0.0505
KALIMANTAN SELATAN	HULU SUNGAI TENGAH	630700	0.0062	0.003	0.0092	0.0051	0.0023	0.0074	0.0054	0.007	0.0025	0.0043	0.0192	0.0217	0.0575
KALIMANTAN SELATAN	TABALONG	630900	0.0062	0.003	0.0092	0.0132	0.0059	0.0191	0.0095	0.007	0.0025	0.0043	0.0233	0.0147	0.0663
KALIMANTAN TIMUR	KOTA SAMARINDA	647200	0.0031	0.003	0.0061	0.0051	0.0059	0.011	0.0024	0.0034	0.0025	0.003	0.0113	0.0147	0.0431
KALIMANTAN TIMUR	KUTAI	640200	0.0126	0.003	0.0156	0.0083	0.0059	0.0142	0.0054	0.0151	0.0025	0.0043	0.0273	0.0046	0.0617
KALIMANTAN TIMUR	BERAU	640300	0.0126	0.003	0.0156	0.0083	0.0059	0.0142	0.0054	0.007	0.0025	0.0043	0.0192	0.0147	0.0637
KALIMANTAN TIMUR	KOTA BALIKPAPAN	647100	0.0126	0.003	0.0156	0.0083	0.0059	0.0142	0.0095	0.0151	0.0025	0.003	0.0301	0.0046	0.0645
KALIMANTAN TIMUR	PASIR	640100	0.0126	0.003	0.0156	0.0051	0.0059	0.011	0.0054	0.007	0.0025	0.003	0.0179	0.0217	0.0662
SULAWESI UTARA	SANGIHE TALAUD	710400	0.0062	0.003	0.0092	0.002	0.0014	0.0034	0.0054	0.007	0.0025	0.0043	0.0192	0.0046	0.0364
SULAWESI UTARA	KOTA BITUNG	710302	0.0062	0.003	0.0092	0.0051	0.0023	0.0074	0.0054	0.007	0.0025	0.0043	0.0192	0.0046	0.0404
SULAWESI UTARA	KOTA MANADO	717200	0.0031	0.0061	0.0092	0.0083	0.0014	0.0097	0.0024	0.0034	0.0025	0.003	0.0113	0.0147	0.0449
SULAWESI UTARA	MINAHASA	710300	0.0062	0.003	0.0092	0.0051	0.0014	0.0065	0.0054	0.007	0.0025	0.0043	0.0192	0.0147	0.0496
GORONTALO	GORONTALO	710100	0.0062	0.003	0.0092	0.002	0.0014	0.0034	0.0054	0.007	0.0025	0.0043	0.0192	0.0046	0.0364
GORONTALO	KOTA GORONTALO	717100	0.0062	0.003	0.0092	0.002	0.0023	0.0043	0.0095	0.007	0.0025	0.0043	0.0233	0.0217	0.0585
SULAWESI TENGAH	POSO	720200	0.0126	0.003	0.0156	0.0031	0.0023	0.0054	0.0095	0.0151	0.0051	0.0072	0.0369	0.0147	0.0726
SULAWESI TENGAH	MOROWALI	720200	0.0126	0.003	0.0156	0.0031	0.0037	0.0068	0.0095	0.0151	0.0099	0.003	0.0375	0.0147	0.0746
SULAWESI TENGAH	TOLI TOLI	720400	0.0126	0.0061	0.0187	0.0051	0.0037	0.0088	0.0165	0.0151	0.0051	0.0072	0.0439	0.0046	0.076
SULAWESI TENGAH	BANGGAI	720100	0.0062	0.0061	0.0123	0.0051	0.0023	0.0074	0.0165	0.0151	0.0051	0.0072	0.0439	0.0147	0.0783
SULAWESI TENGAH	DONGGALA	720300	0.0126	0.0061	0.0187	0.0083	0.0014	0.0097	0.0165	0.0151	0.0051	0.0072	0.0439	0.0147	0.087
SULAWESI TENGGARA	KOLAKA	740400	0.0062	0.003	0.0092	0.0051	0.0023	0.0074	0.0095	0.0151	0.0051	0.003	0.0327	0.0046	0.0539
SULAWESI TENGGARA	BUTON	740100	0.0062	0.003	0.0092	0.002	0.0023	0.0043	0.0095	0.0151	0.0051	0.003	0.0327	0.0217	0.0679
SULAWESI SELATAN	MAJENE	732000	0.0126	0.003	0.0156	0.0051	0.0014	0.0065	0.0054	0.007	0.0012	0.0043	0.0179	0.0046	0.0446
SULAWESI SELATAN	TANA TORAJA	731800	0.0126	0.003	0.0156	0.0051	0.0023	0.0074	0.0054	0.007	0.0012	0.0043	0.0179	0.0147	0.0556
SULAWESI SELATAN	PINRANG	731500	0.0062	0.0008	0.007	0.0051	0.0023	0.0074	0.0095	0.007	0.0051	0.0072	0.0288	0.0147	0.0579
SULAWESI SELATAN	LUWU	731700	0.0126	0.003	0.0156	0.002	0.0023	0.0043	0.0054	0.007	0.0012	0.0043	0.0179	0.0217	0.0595
SULAWESI SELATAN	PANGKAJENE KEPULAUAN	730900	0.0126	0.003	0.0156	0.0132	0.0023	0.0155	0.0054	0.007	0.0012	0.0043	0.0179	0.0147	0.0637
SULAWESI SELATAN	KOTA PARE-PARE	737200	0.0248	0.0008	0.0256	0.002	0.0023	0.0043	0.0165	0.007	0.0099	0.0043	0.0377	0.0147	0.0823
NUSA TENGGARA BARAT	LOMBOK BARAT	520101	0.0031	0.003	0.0061	0.0083	0.0014	0.0097	0.0024	0.0034	0.0025	0.0015	0.0098	0.0046	0.0302
NUSA TENGGARA BARAT	BIMA	520600	0.0031	0.0015	0.0046	0.0083	0.0014	0.0097	0.0054	0.0034	0.0012	0.0015	0.0115	0.0046	0.0304
NUSA TENGGARA BARAT	KOTA MATARAM	520102	0.0126	0.0015	0.0141	0.0083	0.0023	0.0106	0.0054	0.007	0.0012	0.0015	0.0151	0.0046	0.0444
NUSA TENGGARA TIMUR	FLORES TIMUR	530800	0.0031	0.003	0.0061	0.0051	0.0037	0.0088	0.0054	0.0034	0.0051	0.0015	0.0154	0.0046	0.0349
NUSA TENGGARA TIMUR	ENDE	531000	0.0031	0.003	0.0061	0.0051	0.0014	0.0065	0.0054	0.0034	0.0051	0.0015	0.0154	0.0217	0.0497
NUSA TENGGARA TIMUR	TIMOR TENGAH SELATAN	530400	0.0062	0.0015	0.0077	0.0031	0.0023	0.0054	0.0054	0.0151	0.0051	0.0043	0.0299	0.0147	0.0577
NUSA TENGGARA TIMUR	TIMOR TENGAH UTARA	530500	0.0126	0.0061	0.0187	0.0031	0.0023	0.0054	0.0095	0.007	0.0051	0.0043	0.0259	0.0147	0.0647
NUSA TENGGARA TIMUR	KOTA KUPANG	530302	0.0126	0.0061	0.0187	0.0083	0.0014	0.0097	0.0095	0.007	0.0051	0.0043	0.0259	0.0147	0.069
PAPUA	MANOKWARI	820700	0.0126	0.003	0.0156	0.0051	0.0037	0.0088	0.0095	0.007	0.0025	0.0072	0.0262	0.0046	0.0552
PAPUA	FAKFAK	820500	0.0126	0.003	0.0156	0.0051	0.0059	0.011	0.0095	0.007	0.0025	0.0072	0.0262	0.0046	0.0574

## Sheet: socpol_02
prov_kppod_02	kab_kppod_02	kabID97	bus_sec_02	comm_sec_02	quickreply_02	subtot_sec_02	part_comm_02	soc_conflict_02	pol_stab_02	demo_intens_02	subtot_socpol_02	open_comm_bus_02	nodiscr_02	soc_customs_02	comm_workethos_02	subtot_soccul_02	tot_socpol_02
SUMATERA UTARA	DELI SERDANG	121000	0.0034	0.0036	0.0102	0.0172	0.0017	0.0024	0.0048	0.0012	0.0101	0.0012	0.0009	0.0012	0.0019	0.0052	0.0325
SUMATERA UTARA	LANGKAT	121100	0.0034	0.0036	0.0102	0.0172	0.0017	0.0024	0.0048	0.0012	0.0101	0.0012	0.0009	0.0012	0.0019	0.0052	0.0325
SUMATERA UTARA	KOTA SIBOLGA	127100	0.0153	0.008	0.0214	0.0447	0.0017	0.0095	0.0048	0.0049	0.0209	0.0025	0.0009	0.002	0.004	0.0094	0.075
SUMATERA UTARA	ASAHAN	120600	0.0062	0.0036	0.0102	0.02	0.0023	0.0024	0.002	0.0012	0.0079	0.0025	0.0009	0.002	0.004	0.0094	0.0373
SUMATERA UTARA	DAIRI	120800	0.0254	0.0163	0.0214	0.0631	0.0037	0.0095	0.0048	0.0012	0.0192	0.0041	0.0031	0.0012	0.004	0.0124	0.0947
SUMATERA UTARA	KOTA PEMATANG SIANTAR	127300	0.0034	0.0036	0.0102	0.0172	0.0017	0.0024	0.0048	0.0012	0.0101	0.0012	0.0009	0.0012	0.0019	0.0052	0.0325
SUMATERA UTARA	KOTA MEDAN	127500	0.0062	0.0036	0.0102	0.02	0.0017	0.0024	0.0048	0.0005	0.0094	0.0012	0.0009	0.0012	0.0019	0.0052	0.0346
SUMATERA UTARA	KOTA TANJUNG BALAI	127200	0.0062	0.0036	0.0102	0.02	0.0017	0.0024	0.0048	0.0012	0.0101	0.0012	0.0009	0.0012	0.0019	0.0052	0.0353
SUMATERA UTARA	KOTA TEBING TINGGI	127400	0.0062	0.0036	0.0102	0.02	0.0017	0.0024	0.0048	0.0012	0.0101	0.0012	0.0009	0.0012	0.0019	0.0052	0.0353
SUMATERA UTARA	SIMALUNGUN	120700	0.0034	0.0036	0.0102	0.0172	0.0017	0.0024	0.0048	0.0012	0.0101	0.0012	0.0009	0.0012	0.0019	0.0052	0.0325
SUMATERA UTARA	KOTA BINJAI	127600	0.0034	0.0036	0.0102	0.0172	0.0017	0.0024	0.0048	0.0012	0.0101	0.0012	0.0009	0.0012	0.0019	0.0052	0.0325
SUMATERA BARAT	PESISIR SELATAN	130100	0.0062	0.0036	0.0102	0.02	0.0017	0.0024	0.0048	0.0025	0.0114	0.0025	0.0009	0.0012	0.0009	0.0055	0.0369
SUMATERA BARAT	KOTA SAWAH LUNTO	130302	0.0153	0.0163	0.0214	0.053	0.003	0.0095	0.0048	0.0049	0.0222	0.0041	0.0031	0.0032	0.004	0.0144	0.0896
SUMATERA BARAT	KOTA PADANG	137100	0.0153	0.008	0.0102	0.0335	0.0017	0.0024	0.002	0.0025	0.0086	0.0025	0.0009	0.0005	0.004	0.0079	0.05
SUMATERA BARAT	SAWAHLUNTO/SIJUNJUNG	130300	0.0153	0.008	0.0102	0.0335	0.0017	0.0095	0.0048	0.0025	0.0185	0.0025	0.0009	0.0012	0.0009	0.0055	0.0575
R I A U	INDRAGIRI HILIR	140200	0.0062	0.008	0.0214	0.0356	0.0023	0.0024	0.0094	0.0025	0.0166	0.0012	0.0018	0.002	0.0019	0.0069	0.0591
R I A U	KOTA BATAM	147200	0.0153	0.008	0.0214	0.0447	0.0023	0.0048	0.0048	0.0012	0.0131	0.0025	0.0018	0.002	0.004	0.0103	0.0681
R I A U	BENGKALIS	140500	0.0153	0.008	0.0048	0.0281	0.0023	0.0024	0.0048	0.0025	0.012	0.0025	0.0009	0.0012	0.0019	0.0065	0.0466
R I A U	KAMPAR	140400	0.0062	0.008	0.0214	0.0356	0.0023	0.0024	0.0094	0.0025	0.0166	0.0012	0.0018	0.002	0.0019	0.0069	0.0591
R I A U	KOTA PEKAN BARU	147100	0.0153	0.008	0.0214	0.0447	0.0023	0.0048	0.0094	0.0012	0.0177	0.0025	0.0018	0.002	0.004	0.0103	0.0727
J A M B I	BATANGHARI	150400	0.0153	0.008	0.0214	0.0447	0.003	0.0095	0.0048	0.0025	0.0198	0.0041	0.0018	0.0012	0.004	0.0111	0.0756
J A M B I	KERINCI	150100	0.0153	0.008	0.0214	0.0447	0.003	0.0095	0.0048	0.0025	0.0198	0.0041	0.0018	0.0012	0.004	0.0111	0.0756
J A M B I	BUNGOTEBO	150200	0.0153	0.008	0.0214	0.0447	0.003	0.0095	0.0048	0.0025	0.0198	0.0041	0.0018	0.0012	0.004	0.0111	0.0756
SUMATERA SELATAN	OGAN KOMERING ILIR	160200	0.0062	0.0036	0.0102	0.02	0.0017	0.0024	0.0048	0.0012	0.0101	0.0012	0.0009	0.0012	0.0009	0.0042	0.0343
SUMATERA SELATAN	KOTA PALEMBANG	167100	0.0153	0.0163	0.0214	0.053	0.003	0.0048	0.0094	0.0012	0.0184	0.0025	0.0009	0.0012	0.0009	0.0055	0.0769
SUMATERA SELATAN	MUARA ENIM	160300	0.0062	0.008	0.0102	0.0244	0.0017	0.0048	0.0048	0.0012	0.0125	0.0025	0.0004	0.0012	0.0019	0.006	0.0429
SUMATERA SELATAN	MUSI BANYUASIN	160600	0.0062	0.0036	0.0102	0.02	0.0017	0.0024	0.0048	0.0012	0.0101	0.0012	0.0009	0.0012	0.0009	0.0042	0.0343
SUMATERA SELATAN	MUSI RAWAS	160500	0.0062	0.0036	0.0102	0.02	0.0017	0.0024	0.0048	0.0012	0.0101	0.0012	0.0009	0.0012	0.0009	0.0042	0.0343
BANGKA BELITUNG	KOTA PANGKAL PINANG	167200	0.0062	0.0036	0.0102	0.02	0.0023	0.0024	0.0048	0.0012	0.0107	0.0025	0.0018	0.002	0.0019	0.0082	0.0389
BANGKA BELITUNG	BANGKA	160700	0.0062	0.0036	0.0102	0.02	0.0023	0.0024	0.0048	0.0012	0.0107	0.0025	0.0018	0.002	0.0019	0.0082	0.0389
BENGKULU	BENGKULU SELATAN	170100	0.0062	0.0036	0.0102	0.02	0.0017	0.0024	0.0048	0.0012	0.0101	0.0012	0.0009	0.0012	0.0019	0.0052	0.0353
BENGKULU	KOTA BENGKULU	177100	0.0062	0.0036	0.0102	0.02	0.0017	0.0024	0.0048	0.0012	0.0101	0.0012	0.0009	0.0012	0.0019	0.0052	0.0353
LAMPUNG	LAMPUNG SELATAN	180101	0.0062	0.0021	0.0102	0.0185	0.0014	0.0024	0.0048	0.0012	0.0098	0.0025	0.0018	0.0012	0.0019	0.0074	0.0357
LAMPUNG	LAMPUNG TIMUR	180200	0.0034	0.0021	0.0048	0.0103	0.0017	0.0011	0.002	0.0005	0.0053	0.0003	0.0004	0.0005	0.0009	0.0021	0.0177
LAMPUNG	KOTA BANDAR LAMPUNG	187100	0.0062	0.0036	0.0102	0.02	0.0023	0.0024	0.0048	0.0012	0.0107	0.0025	0.0018	0.0012	0.0019	0.0074	0.0381
LAMPUNG	LAMPUNG BARAT	180302	0.0153	0.0163	0.0102	0.0418	0.0017	0.0024	0.0094	0.0049	0.0184	0.0025	0.0009	0.0012	0.0019	0.0065	0.0667
BANTEN	TANGERANG	321901	0.0153	0.008	0.0102	0.0335	0.0023	0.0048	0.0048	0.0005	0.0124	0.0025	0.0018	0.002	0.004	0.0103	0.0562
BANTEN	SERANG	322000	0.0062	0.008	0.0214	0.0356	0.0014	0.0048	0.002	0.0012	0.0094	0.0025	0.0004	0.0012	0.0019	0.006	0.051
BANTEN	KOTA TANGERANG	321902	0.0153	0.008	0.0214	0.0447	0.0023	0.0048	0.0048	0.0012	0.0131	0.0041	0.0018	0.002	0.004	0.0119	0.0697
BANTEN	LEBAK	320200	0.0153	0.008	0.0214	0.0447	0.0017	0.0048	0.002	0.0005	0.009	0.0041	0.0031	0.0012	0.004	0.0124	0.0661
JAWA BARAT	CIAMIS	320900	0.0062	0.0036	0.0048	0.0146	0.0017	0.0011	0.0048	0.0012	0.0088	0.0012	0.0009	0.0012	0.0019	0.0052	0.0286
JAWA BARAT	SUKABUMI	320400	0.0153	0.0036	0.0102	0.0291	0.0017	0.0011	0.0048	0.0012	0.0088	0.0012	0.0009	0.0012	0.0019	0.0052	0.0431
JAWA BARAT	KUNINGAN	321000	0.0062	0.0036	0.0048	0.0146	0.0017	0.0011	0.0048	0.0012	0.0088	0.0012	0.0009	0.0012	0.0019	0.0052	0.0286
JAWA BARAT	GARUT	320700	0.0062	0.0036	0.0048	0.0146	0.0017	0.0011	0.0048	0.0012	0.0088	0.0012	0.0009	0.0012	0.0019	0.0052	0.0286
JAWA BARAT	CIREBON	321100	0.0062	0.0036	0.0048	0.0146	0.0017	0.0011	0.0048	0.0012	0.0088	0.0012	0.0009	0.0012	0.0019	0.0052	0.0286
JAWA BARAT	SUMEDANG	321300	0.0062	0.0036	0.0048	0.0146	0.0017	0.0011	0.0048	0.0012	0.0088	0.0012	0.0009	0.0005	0.0019	0.0045	0.0279
JAWA BARAT	TASIKMALAYA	320800	0.0034	0.0036	0.0048	0.0118	0.0017	0.0011	0.0048	0.0012	0.0088	0.0012	0.0009	0.0012	0.0019	0.0052	0.0258
JAWA BARAT	KOTA BEKASI	321802	0.0153	0.008	0.0214	0.0447	0.0023	0.0048	0.0094	0.0005	0.017	0	0.0018	0.002	0.004	0.0078	0.0695
JAWA BARAT	KOTA BOGOR	327100	0.0153	0.008	0.0214	0.0447	0.0023	0.0048	0.0094	0.0005	0.017	0.0025	0.0018	0.002	0.004	0.0103	0.072
JAWA BARAT	KOTA CIREBON	327400	0.0034	0.0036	0.0048	0.0118	0.0017	0.0011	0.0048	0.0012	0.0088	0.0012	0.0009	0.0012	0.0019	0.0052	0.0258
JAWA BARAT	BOGOR	320300	0.0153	0.008	0.0214	0.0447	0.0023	0.0048	0.0094	0.0005	0.017	0.0025	0.0018	0.002	0.004	0.0103	0.072
JAWA BARAT	KOTA SUKABUMI	327200	0.0153	0.008	0.0102	0.0335	0.0017	0.0048	0.0048	0.0025	0.0138	0.0025	0.0009	0.0012	0.0019	0.0065	0.0538
JAWA BARAT	KARAWANG	321700	0.0062	0.0036	0.0214	0.0312	0.0023	0.0024	0.0048	0.0012	0.0107	0.0025	0.0018	0.002	0.004	0.0103	0.0522
JAWA BARAT	BEKASI	321801	0.0153	0.008	0.0214	0.0447	0.0023	0.0048	0.0094	0.0005	0.017	0.0025	0.0018	0.002	0.004	0.0103	0.072
JAWA BARAT	INDRAMAYU	321400	0.0062	0.0036	0.0048	0.0146	0.0017	0.0011	0.0048	0.0012	0.0088	0.0012	0.0009	0.0012	0.0019	0.0052	0.0286
JAWA TENGAH	KOTA SEMARANG	337400	0.0254	0.0163	0.0214	0.0631	0.003	0.0095	0.0094	0.0012	0.0231	0.0041	0.0031	0.0032	0.0067	0.0171	0.1033
JAWA TENGAH	KENDAL	332400	0.0062	0.0163	0.0214	0.0439	0.0023	0.0095	0.0094	0.0049	0.0261	0.0041	0.0018	0.0032	0.0067	0.0158	0.0858
JAWA TENGAH	PEMALANG	332700	0.0254	0.0163	0.0214	0.0631	0.003	0.0095	0.0094	0.0025	0.0244	0.0041	0.0018	0.002	0.0019	0.0098	0.0973
JAWA TENGAH	KOTA PEKALONGAN	337500	0.0254	0.0163	0.0214	0.0631	0.0023	0.0095	0.0012	0.0049	0.0179	0.0041	0.0031	0.002	0.0067	0.0159	0.0969
JAWA TENGAH	PEKALONGAN	332600	0.0254	0.0163	0.0214	0.0631	0.0023	0.0095	0.0094	0.0049	0.0261	0.0041	0.0031	0.002	0.0067	0.0159	0.1051
JAWA TENGAH	MAGELANG	330800	0.0254	0.0163	0.0214	0.0631	0.0023	0.0095	0.0094	0.0049	0.0261	0.0041	0.0031	0.0032	0.004	0.0144	0.1036
JAWA TENGAH	TEGAL	332800	0.0254	0.0163	0.0214	0.0631	0.0023	0.0048	0.0094	0.0049	0.0214	0.0041	0.0031	0.002	0.0067	0.0159	0.1004
JAWA TENGAH	KOTA TEGAL	337600	0.0254	0.0163	0.0214	0.0631	0.003	0.0048	0.0094	0.0049	0.0221	0.0041	0.0031	0.0032	0.0067	0.0171	0.1023
JAWA TENGAH	SUKOHARJO	331100	0.0153	0.008	0.0214	0.0447	0.0023	0.0048	0.0094	0.0025	0.019	0.0041	0.0018	0.0032	0.0067	0.0158	0.0795
D.I. YOGYAKARTA	KOTA YOGYAKARTA	347100	0.0153	0.008	0.0102	0.0335	0.003	0.0048	0.0048	0.0012	0.0138	0.0041	0.0018	0.002	0.004	0.0119	0.0592
JAWA TIMUR	BANGKALAN	352600	0.0062	0.0036	0.0102	0.02	0.0017	0.0024	0.002	0.0049	0.011	0.0012	0.0004	0.0012	0.0019	0.0047	0.0357
JAWA TIMUR	PAMEKASAN	352800	0.0062	0.0036	0.0102	0.02	0.0017	0.0024	0.002	0.0049	0.011	0.0012	0.0004	0.0012	0.0019	0.0047	0.0357
JAWA TIMUR	KOTA MALANG	357300	0.0153	0.008	0.0102	0.0335	0.0023	0.0048	0.0094	0.0025	0.019	0.0025	0.0009	0.002	0.0019	0.0073	0.0598
JAWA TIMUR	SIDOARJO	351500	0.0062	0.008	0.0102	0.0244	0.003	0.0095	0.0048	0.0025	0.0198	0.0025	0.0004	0.0012	0.0019	0.006	0.0502
JAWA TIMUR	KOTA SURABAYA	357800	0.0153	0.0163	0.0102	0.0418	0.003	0.0048	0.002	0.0005	0.0103	0.0006	0.0009	0.0032	0.004	0.0087	0.0608
JAWA TIMUR	PASURUAN	351400	0.0153	0.0163	0.0102	0.0418	0.003	0.0095	0.0048	0.0012	0.0185	0.0012	0.0002	0.002	0.0009	0.0043	0.0646
JAWA TIMUR	MOJOKERTO	351600	0.0153	0.008	0.0214	0.0447	0.0017	0.0024	0.0048	0.0025	0.0114	0.0025	0.0018	0.0012	0.0019	0.0074	0.0635
JAWA TIMUR	KOTA KEDIRI	357100	0.0153	0.0163	0.0102	0.0418	0.003	0.0095	0.002	0.0049	0.0194	0.0025	0.0004	0.002	0.0019	0.0068	0.068
JAWA TIMUR	KEDIRI	350600	0.0153	0.0036	0.0102	0.0291	0.003	0.0048	0.0094	0.0025	0.0197	0.0025	0.0009	0.0012	0.0019	0.0065	0.0553
JAWA TIMUR	KOTA MOJOKERTO	357600	0.0062	0.0036	0.0102	0.02	0.0023	0.0024	0.0048	0.0025	0.012	0.0012	0.0009	0.0005	0.0019	0.0045	0.0365
JAWA TIMUR	BLITAR	350500	0.0153	0.008	0.0102	0.0335	0.0023	0.0095	0.0094	0.0049	0.0261	0.0025	0.0018	0.0012	0.0019	0.0074	0.067
JAWA TIMUR	KOTA PROBOLINGGO	357400	0.0062	0.0036	0.0102	0.02	0.0023	0.0024	0.0048	0.0025	0.012	0.0012	0.0009	0.0005	0.0019	0.0045	0.0365
JAWA TIMUR	MAGETAN	352000	0.0153	0.008	0.0102	0.0335	0.0023	0.0048	0.0094	0.0049	0.0214	0.0025	0.0018	0.0012	0.0019	0.0074	0.0623
JAWA TIMUR	BANYUWANGI	351000	0.0062	0.0036	0.0102	0.02	0.0023	0.0024	0.0048	0.0049	0.0144	0.0012	0.0009	0.0005	0.0019	0.0045	0.0389
BALI	GIANYAR	510400	0.0254	0.0163	0.0214	0.0631	0.0023	0.0048	0.0094	0.0012	0.0177	0.0012	0.0009	0.0012	0.004	0.0073	0.0881
BALI	BADUNG	510301	0.0254	0.008	0.0214	0.0548	0.0023	0.0024	0.0094	0.0012	0.0153	0.0012	0.0009	0.0012	0.0019	0.0052	0.0753
BALI	KOTA DENPASAR	510302	0.0153	0.008	0.0214	0.0447	0.0017	0.0048	0.0048	0.0025	0.0138	0.0025	0.0018	0.002	0.0019	0.0082	0.0667
BALI	TABANAN	510200	0.0153	0.008	0.0214	0.0447	0.0023	0.0095	0.0048	0.0012	0.0178	0.0012	0.0009	0.0012	0.0019	0.0052	0.0677
BALI	JEMBRANA	510100	0.0153	0.008	0.0214	0.0447	0.0023	0.0024	0.0048	0.0012	0.0107	0.0012	0.0009	0.0012	0.0009	0.0042	0.0596
BALI	BULELENG	510800	0.0153	0.008	0.0214	0.0447	0.0023	0.0048	0.0048	0.0005	0.0124	0.0012	0.0009	0.0012	0.0009	0.0042	0.0613
BALI	BANGLI	510600	0.0153	0.008	0.0214	0.0447	0.0023	0.0048	0.0048	0.0012	0.0131	0.0012	0.0009	0.0012	0.0019	0.0052	0.063
KALIMANTAN BARAT	SAMBAS	610100	0.0034	0.0012	0.0048	0.0094	0.0017	0.0007	0.012	0.0025	0.0169	0.0025	0.0018	0.002	0.0009	0.0072	0.0335
KALIMANTAN BARAT	KAPUAS HULU	610600	0.0062	0.008	0.0102	0.0244	0.0017	0.0011	0.0094	0.0049	0.0171	0.0012	0.0004	0.0005	0.0009	0.003	0.0445
KALIMANTAN BARAT	KETAPANG	610400	0.0034	0.0036	0.0102	0.0172	0.0017	0.0011	0.002	0.0025	0.0073	0.0025	0.0018	0.002	0.0009	0.0072	0.0317
KALIMANTAN BARAT	SANGGAU	610300	0.0062	0.0036	0.0048	0.0146	0.0017	0.0007	0.012	0.0025	0.0169	0.0025	0.0018	0.002	0.0009	0.0072	0.0387
KALIMANTAN BARAT	PONTIANAK	610200	0.0062	0.0036	0.0102	0.02	0.0017	0.0011	0.002	0.0025	0.0073	0.0025	0.0018	0.0012	0.0019	0.0074	0.0347
KALIMANTAN TENGAH	BARITO UTARA	620500	0.0062	0.008	0.0102	0.0244	0.0017	0.0048	0.002	0.0025	0.011	0.0012	0.0009	0.0005	0.0009	0.0035	0.0389
KALIMANTAN TENGAH	BARITO SELATAN	620400	0.0062	0.0036	0.0102	0.02	0.0017	0.0011	0.0094	0.0012	0.0134	0.0012	0.0009	0.002	0.004	0.0081	0.0415
KALIMANTAN TENGAH	KAPUAS	620300	0.0062	0.0036	0.0102	0.02	0.0023	0.0011	0.0048	0.0012	0.0094	0.0012	0.0009	0.0012	0.004	0.0073	0.0367
KALIMANTAN SELATAN	HULU SUNGAI SELATAN	630600	0.0062	0.0036	0.0102	0.02	0.0023	0.0024	0.0048	0.0012	0.0107	0.0025	0.0018	0.002	0.0019	0.0082	0.0389
KALIMANTAN SELATAN	TAPIN	630500	0.0062	0.0036	0.0102	0.02	0.0017	0.0024	0.0048	0.0012	0.0101	0.0012	0.0009	0.0012	0.0019	0.0052	0.0353
KALIMANTAN SELATAN	TABALONG	630900	0.0062	0.0036	0.0102	0.02	0.0023	0.0024	0.0048	0.0012	0.0107	0.0025	0.0018	0.002	0.0019	0.0082	0.0389
KALIMANTAN SELATAN	HULU SUNGAI TENGAH	630700	0.0062	0.0036	0.0102	0.02	0.0023	0.0024	0.0048	0.0012	0.0107	0.0025	0.0018	0.002	0.0019	0.0082	0.0389
KALIMANTAN SELATAN	HULU SUNGAI UTARA	630800	0.0062	0.0036	0.0102	0.02	0.0023	0.0024	0.0048	0.0012	0.0107	0.0025	0.0018	0.002	0.0019	0.0082	0.0389
KALIMANTAN SELATAN	TANAH LAUT	630100	0.0062	0.0036	0.0102	0.02	0.0017	0.0024	0.0048	0.0025	0.0114	0.0025	0.0018	0.002	0.0019	0.0082	0.0396
KALIMANTAN TIMUR	KOTA BALIKPAPAN	647100	0.0153	0.0036	0.0214	0.0403	0.0023	0.0048	0.0094	0.0025	0.019	0.0025	0.0031	0.002	0.004	0.0116	0.0709
KALIMANTAN TIMUR	BERAU	640300	0.0062	0.008	0.0102	0.0244	0.003	0.0024	0.0094	0.0012	0.016	0.0025	0.0018	0.0012	0.0019	0.0074	0.0478
KALIMANTAN TIMUR	KUTAI	640200	0.0153	0.0163	0.0214	0.053	0.0023	0.0095	0.0094	0.0049	0.0261	0.0025	0.0018	0.002	0.0019	0.0082	0.0873
KALIMANTAN TIMUR	KOTA SAMARINDA	647200	0.0062	0.0036	0.0102	0.02	0.0023	0.0048	0.0048	0.0012	0.0131	0.0025	0.0009	0.002	0.004	0.0094	0.0425
KALIMANTAN TIMUR	PASIR	640100	0.0062	0.0036	0.0102	0.02	0.0023	0.0024	0.0048	0.0012	0.0107	0.0012	0.0009	0.0012	0.0019	0.0052	0.0359
SULAWESI UTARA	KOTA MANADO	717200	0.0153	0.008	0.0048	0.0281	0.0017	0.0048	0.0094	0.0025	0.0184	0.0025	0.0018	0.0012	0.0019	0.0074	0.0539
SULAWESI UTARA	KOTA BITUNG	710302	0.0153	0.008	0.0102	0.0335	0.0023	0.0048	0.0094	0.0025	0.019	0.0025	0.0018	0.002	0.0019	0.0082	0.0607
SULAWESI UTARA	MINAHASA	710300	0.0153	0.008	0.0102	0.0335	0.0023	0.0048	0.0094	0.0025	0.019	0.0025	0.0018	0.002	0.0019	0.0082	0.0607
SULAWESI UTARA	SANGIHE TALAUD	710400	0.0153	0.008	0.0102	0.0335	0.0023	0.0048	0.0094	0.0025	0.019	0.0025	0.0018	0.002	0.0019	0.0082	0.0607
GORONTALO	GORONTALO	710100	0.0153	0.008	0.0102	0.0335	0.0023	0.0048	0.0094	0.0025	0.019	0.0025	0.0018	0.002	0.0019	0.0082	0.0607
GORONTALO	KOTA GORONTALO	717100	0.0153	0.008	0.0102	0.0335	0.003	0.0048	0.0094	0.0025	0.0197	0.0025	0.0018	0.002	0.0019	0.0082	0.0614
SULAWESI TENGAH	POSO	720200	0.0034	0.0021	0.0048	0.0103	0.003	0.0007	0.001	0.0025	0.0072	0.0012	0.0009	0.0012	0.0019	0.0052	0.0227
SULAWESI TENGAH	BANGGAI	720100	0.0153	0.008	0.0102	0.0335	0.0037	0.0024	0.0094	0.0025	0.018	0.0041	0.0031	0.002	0.0067	0.0159	0.0674
SULAWESI TENGAH	TOLI TOLI	720400	0.0153	0.008	0.0102	0.0335	0.0037	0.0024	0.0094	0.0025	0.018	0.0041	0.0031	0.002	0.0067	0.0159	0.0674
SULAWESI TENGAH	DONGGALA	720300	0.0153	0.008	0.0102	0.0335	0.0037	0.0024	0.0094	0.0025	0.018	0.0041	0.0031	0.002	0.0067	0.0159	0.0674
SULAWESI TENGAH	MOROWALI	720200	0.0153	0.008	0.0102	0.0335	0.003	0.0024	0.0094	0.0049	0.0197	0.0041	0.0031	0.002	0.004	0.0132	0.0664
SULAWESI TENGGARA	KOLAKA	740400	0.0153	0.008	0.0102	0.0335	0.0023	0.0048	0.0048	0.0025	0.0144	0.0012	0.0009	0.0012	0.0019	0.0052	0.0531
SULAWESI TENGGARA	BUTON	740100	0.0153	0.008	0.0102	0.0335	0.0023	0.0048	0.0048	0.0025	0.0144	0.0012	0.0009	0.0012	0.0019	0.0052	0.0531
SULAWESI SELATAN	KOTA PARE-PARE	737200	0.0153	0.008	0.0102	0.0335	0.0023	0.0095	0.0048	0.0049	0.0215	0.0025	0.0009	0.0012	0.0019	0.0065	0.0615
SULAWESI SELATAN	PANGKAJENE KEPULAUAN	730900	0.0153	0.008	0.0102	0.0335	0.0023	0.0024	0.0094	0.0012	0.0153	0.0012	0.0018	0.002	0.0019	0.0069	0.0557
SULAWESI SELATAN	PINRANG	731500	0.0153	0.008	0.0102	0.0335	0.0017	0.0095	0.002	0.0049	0.0181	0.0025	0.0009	0.002	0.004	0.0094	0.061
SULAWESI SELATAN	TANA TORAJA	731800	0.0153	0.008	0.0102	0.0335	0.0023	0.0024	0.0048	0.0012	0.0107	0.0012	0.0009	0.0012	0.0019	0.0052	0.0494
SULAWESI SELATAN	MAJENE	732000	0.0153	0.008	0.0102	0.0335	0.0023	0.0024	0.0094	0.0012	0.0153	0.0012	0.0018	0.002	0.0019	0.0069	0.0557
SULAWESI SELATAN	LUWU	731700	0.0153	0.0036	0.0102	0.0291	0.0023	0.0024	0.0048	0.0012	0.0107	0.0012	0.0009	0.0012	0.0019	0.0052	0.045
NUSA TENGGARA BARAT	LOMBOK BARAT	520101	0.0062	0.0021	0.0048	0.0131	0.0017	0.0011	0.0048	0.0005	0.0081	0.0025	0.0031	0.0012	0.004	0.0108	0.032
NUSA TENGGARA BARAT	BIMA	520600	0.0062	0.0021	0.0048	0.0131	0.0017	0.0011	0.002	0.0012	0.006	0.0012	0.0018	0.002	0.0019	0.0069	0.026
NUSA TENGGARA BARAT	KOTA MATARAM	520102	0.0153	0.0036	0.0214	0.0403	0.0017	0.0024	0.002	0.0012	0.0073	0.0012	0.0018	0.002	0.0019	0.0069	0.0545
NUSA TENGGARA TIMUR	ENDE	531000	0.0153	0.0036	0.0048	0.0237	0.0017	0.0011	0.002	0.0012	0.006	0.0012	0.0002	0.002	0.0019	0.0053	0.035
NUSA TENGGARA TIMUR	FLORES TIMUR	530800	0.0153	0.008	0.0048	0.0281	0.0017	0.0048	0.002	0.0012	0.0097	0.0012	0.0002	0.002	0.0019	0.0053	0.0431
NUSA TENGGARA TIMUR	KOTA KUPANG	530302	0.0153	0.008	0.0214	0.0447	0.0023	0.0048	0.0094	0.0049	0.0214	0.0025	0.0009	0.0012	0.0019	0.0065	0.0726
NUSA TENGGARA TIMUR	TIMOR TENGAH UTARA	530500	0.0153	0.008	0.0214	0.0447	0.0023	0.0048	0.0094	0.0049	0.0214	0.0025	0.0009	0.0012	0.0019	0.0065	0.0726
NUSA TENGGARA TIMUR	TIMOR TENGAH SELATAN	530400	0.0062	0.008	0.0214	0.0356	0.0014	0.0024	0.0048	0.0049	0.0135	0.0025	0.0004	0.0003	0.0005	0.0037	0.0528
PAPUA	FAKFAK	820500	0.0062	0.008	0.0102	0.0244	0.0017	0.0024	0.0048	0.0025	0.0114	0.0025	0.0009	0.0005	0.0019	0.0058	0.0416
PAPUA	MANOKWARI	820700	0.0153	0.008	0.0102	0.0335	0.0017	0.0024	0.0048	0.0025	0.0114	0.0025	0.0009	0.0005	0.0009	0.0048	0.0497

## Sheet: econ_02
prov_kppod_02	kab_kppod_02	kabID97	PDRB_cap_02	PDRB_growth_02	hdi_02	subtot_econpot_02	valadd_prim_02	valadd_sec_02	valadd_tert_02	subtot_econstr_02	tot_econ_02
SUMATERA UTARA	DELI SERDANG	121000	0.0062	0.0222	0.0051	0.0335	0.0042	0.0043	0.0004	0.0089	0.0424
SUMATERA UTARA	LANGKAT	121100	0.0062	0.0062	0.0051	0.0175	0.0076	0.001	0.0004	0.009	0.0265
SUMATERA UTARA	KOTA SIBOLGA	127100	0.0126	0.0222	0.0051	0.0399	0.0042	0.0023	0.0019	0.0084	0.0483
SUMATERA UTARA	ASAHAN	120600	0.0247	0.0222	0.0051	0.052	0.0076	0.0069	0.0004	0.0149	0.0669
SUMATERA UTARA	DAIRI	120800	0.0062	0.0222	0.0051	0.0335	0.0042	0.0006	0.0004	0.0052	0.0387
SUMATERA UTARA	KOTA PEMATANG SIANTAR	127300	0.0247	0.0062	0.0079	0.0388	0.0016	0.0069	0.0019	0.0104	0.0492
SUMATERA UTARA	KOTA MEDAN	127500	0.0247	0.0016	0.0079	0.0342	0.0016	0.0023	0.0048	0.0087	0.0429
SUMATERA UTARA	KOTA TANJUNG BALAI	127200	0.0247	0.0062	0.0051	0.036	0.0042	0.0023	0.0019	0.0084	0.0444
SUMATERA UTARA	KOTA TEBING TINGGI	127400	0.0126	0.0016	0.0079	0.0221	0.0016	0.0043	0.0048	0.0107	0.0328
SUMATERA UTARA	SIMALUNGUN	120700	0.0062	0.0062	0.0051	0.0175	0.0076	0.0023	0.0004	0.0103	0.0278
SUMATERA UTARA	KOTA BINJAI	127600	0.0062	0.003	0.0051	0.0143	0.0016	0.0043	0.0019	0.0078	0.0221
SUMATERA BARAT	PESISIR SELATAN	130100	0.0062	0.003	0.0051	0.0143	0.0042	0.0023	0.0019	0.0084	0.0227
SUMATERA BARAT	KOTA SAWAH LUNTO	130302	0.0247	0.0016	0.0051	0.0314	0.0076	0.001	0.0019	0.0105	0.0419
SUMATERA BARAT	KOTA PADANG	137100	0.0247	0.0062	0.0079	0.0388	0.0016	0.0023	0.0048	0.0087	0.0475
SUMATERA BARAT	SAWAHLUNTO/SIJUNJUNG	130300	0.0062	0.0062	0.0051	0.0175	0.0076	0.0023	0.0019	0.0118	0.0293
R I A U	INDRAGIRI HILIR	140200	0.0062	0.0133	0.0051	0.0246	0.0076	0.001	0.0019	0.0105	0.0351
R I A U	KOTA BATAM	147200	0.0247	0.0222	0.0079	0.0548	0.0009	0.0069	0.0004	0.0082	0.063
R I A U	BENGKALIS	140500	0.0062	0.0133	0.0051	0.0246	0.0042	0.0023	0.0019	0.0084	0.033
R I A U	KAMPAR	140400	0.0016	0.0016	0.0051	0.0083	0.0076	0.001	0.0008	0.0094	0.0177
R I A U	KOTA PEKAN BARU	147100	0.0126	0.0222	0.0079	0.0427	0.0009	0.0023	0.0048	0.008	0.0507
J A M B I	BATANGHARI	150400	0.0016	0.0016	0.0051	0.0083	0.0076	0.0023	0.0019	0.0118	0.0201
J A M B I	KERINCI	150100	0.0062	0.003	0.0051	0.0143	0.0042	0.001	0.0019	0.0071	0.0214
J A M B I	BUNGOTEBO	150200	0.0016	0.0016	0.0051	0.0083	0.0042	0.001	0.0019	0.0071	0.0154
SUMATERA SELATAN	OGAN KOMERING ILIR	160200	0.0062	0.0062	0.0014	0.0138	0.0076	0.0023	0.0008	0.0107	0.0245
SUMATERA SELATAN	KOTA PALEMBANG	167100	0.0126	0.003	0.0051	0.0207	0.0009	0.0069	0.0019	0.0097	0.0304
SUMATERA SELATAN	MUARA ENIM	160300	0.0062	0.0062	0.0051	0.0175	0.0076	0.001	0.0004	0.009	0.0265
SUMATERA SELATAN	MUSI BANYUASIN	160600	0.0062	0.003	0.0008	0.01	0.0076	0.0023	0.0004	0.0103	0.0203
SUMATERA SELATAN	MUSI RAWAS	160500	0.003	0.0062	0.0051	0.0143	0.0076	0.0023	0.0004	0.0103	0.0246
BANGKA BELITUNG	KOTA PANGKAL PINANG	167200	0.0062	0.0133	0.0051	0.0246	0.0042	0.0023	0.0048	0.0113	0.0359
BANGKA BELITUNG	BANGKA	160700	0.0126	0.0133	0.0051	0.031	0.0076	0.0069	0.0004	0.0149	0.0459
BENGKULU	BENGKULU SELATAN	170100	0.0016	0.0016	0.0051	0.0083	0.0042	0.001	0.0019	0.0071	0.0154
BENGKULU	KOTA BENGKULU	177100	0.0062	0.0133	0.0079	0.0274	0.0016	0.001	0.0048	0.0074	0.0348
LAMPUNG	LAMPUNG SELATAN	180101	0.003	0.0016	0.0051	0.0097	0.0076	0.0023	0.0008	0.0107	0.0204
LAMPUNG	LAMPUNG TIMUR	180200	0.0016	0.0133	0	0.0149	0.0076	0.001	0.0008	0.0094	0.0243
LAMPUNG	KOTA BANDAR LAMPUNG	187100	0.0247	0.003	0.0051	0.0328	0.0016	0.0069	0.0048	0.0133	0.0461
LAMPUNG	LAMPUNG BARAT	180302	0.003	0.0222	0.0051	0.0303	0.0076	0.0006	0.0004	0.0086	0.0389
BANTEN	TANGERANG	321901	0.0062	0.0062	0.0051	0.0175	0.0016	0.0069	0.0004	0.0089	0.0264
BANTEN	SERANG	322000	0.0062	0.0016	0.0051	0.0129	0.0016	0.0069	0.0004	0.0089	0.0218
BANTEN	KOTA TANGERANG	321902	0.0247	0.0062	0.0051	0.036	0.0009	0.0069	0.0019	0.0097	0.0457
BANTEN	LEBAK	320200	0.003	0.0062	0.0051	0.0143	0.0042	0.001	0.0019	0.0071	0.0214
JAWA BARAT	CIAMIS	320900	0.0062	0.0016	0.0051	0.0129	0.0042	0.0023	0.0019	0.0084	0.0213
JAWA BARAT	SUKABUMI	320400	0.003	0.0062	0.0051	0.0143	0.0042	0.0023	0.0019	0.0084	0.0227
JAWA BARAT	KUNINGAN	321000	0.003	0.003	0.0051	0.0111	0.0016	0.001	0.0019	0.0045	0.0156
JAWA BARAT	GARUT	320700	0.003	0.0016	0.0051	0.0097	0.0016	0.001	0.0019	0.0045	0.0142
JAWA BARAT	CIREBON	321100	0.003	0.0016	0.0051	0.0097	0.0016	0.0023	0.0019	0.0058	0.0155
JAWA BARAT	SUMEDANG	321300	0.003	0.0016	0.0051	0.0097	0.0016	0.0023	0.0019	0.0058	0.0155
JAWA BARAT	TASIKMALAYA	320800	0.003	0.003	0.0051	0.0111	0.0042	0.0023	0.0019	0.0084	0.0195
JAWA BARAT	KOTA BEKASI	321802	0.0126	0.0016	0.0051	0.0193	0.0009	0.0069	0.0019	0.0097	0.029
JAWA BARAT	KOTA BOGOR	327100	0.0062	0.0222	0.0079	0.0363	0.0009	0.0043	0.0048	0.01	0.0463
JAWA BARAT	KOTA CIREBON	327400	0.0247	0.0222	0.0051	0.052	0.0009	0.0069	0.0019	0.0097	0.0617
JAWA BARAT	BOGOR	320300	0.0016	0.0016	0.0051	0.0083	0.0016	0.0069	0.0008	0.0093	0.0176
JAWA BARAT	KOTA SUKABUMI	327200	0.0062	0.0016	0.0051	0.0129	0.0009	0.001	0.0048	0.0067	0.0196
JAWA BARAT	KARAWANG	321700	0.0062	0.003	0.0051	0.0143	0.0016	0.0043	0.0019	0.0078	0.0221
JAWA BARAT	BEKASI	321801	0.0247	0.0222	0.0051	0.052	0.0009	0.0069	0.0004	0.0082	0.0602
JAWA BARAT	INDRAMAYU	321400	0.0247	0.0016	0.0014	0.0277	0.0076	0.001	0.0004	0.009	0.0367
JAWA TENGAH	KOTA SEMARANG	337400	0.0247	0.0062	0.0079	0.0388	0.0009	0.0043	0.0048	0.01	0.0488
JAWA TENGAH	KENDAL	332400	0.0062	0.0016	0.0051	0.0129	0.0042	0.0069	0.0008	0.0119	0.0248
JAWA TENGAH	PEMALANG	332700	0.0016	0.0062	0.0051	0.0129	0.0042	0.0023	0.0019	0.0084	0.0213
JAWA TENGAH	KOTA PEKALONGAN	337500	0.0062	0.003	0.0051	0.0143	0.0042	0.0043	0.0019	0.0104	0.0247
JAWA TENGAH	PEKALONGAN	332600	0.0062	0.0016	0.0051	0.0129	0.0016	0.0043	0.0019	0.0078	0.0207
JAWA TENGAH	MAGELANG	330800	0.003	0.003	0.0051	0.0111	0.0042	0.0023	0.0019	0.0084	0.0195
JAWA TENGAH	TEGAL	332800	0.0016	0.003	0.0051	0.0097	0.0016	0.0023	0.0019	0.0058	0.0155
JAWA TENGAH	KOTA TEGAL	337600	0.0062	0.0062	0.0051	0.0175	0.0042	0.0043	0.0048	0.0133	0.0308
JAWA TENGAH	SUKOHARJO	331100	0.0062	0.0016	0.0051	0.0129	0.0016	0.0043	0.0019	0.0078	0.0207
D.I. YOGYAKARTA	KOTA YOGYAKARTA	347100	0.0247	0.0016	0.0079	0.0342	0.0009	0.0023	0.0048	0.008	0.0422
JAWA TIMUR	BANGKALAN	352600	0.003	0.0062	0.0008	0.01	0.0016	0.001	0.0019	0.0045	0.0145
JAWA TIMUR	PAMEKASAN	352800	0.0016	0.0016	0.0008	0.004	0.0076	0.0006	0.0008	0.009	0.013
JAWA TIMUR	KOTA MALANG	357300	0.0247	0.003	0.0051	0.0328	0.0009	0.0043	0.0048	0.01	0.0428
JAWA TIMUR	SIDOARJO	351500	0.0247	0.0016	0.0079	0.0342	0.0016	0.0069	0.0019	0.0104	0.0446
JAWA TIMUR	KOTA SURABAYA	357800	0.0247	0.0016	0.0079	0.0342	0.0009	0.0069	0.0019	0.0097	0.0439
JAWA TIMUR	PASURUAN	351400	0.003	0.0016	0.0014	0.006	0.0016	0.0043	0.0008	0.0067	0.0127
JAWA TIMUR	MOJOKERTO	351600	0.0062	0.0016	0.0051	0.0129	0.0042	0.0043	0.0019	0.0104	0.0233
JAWA TIMUR	KOTA KEDIRI	357100	0.0247	0.0222	0.0051	0.052	0.0009	0.0069	0.0004	0.0082	0.0602
JAWA TIMUR	KEDIRI	350600	0.003	0.0062	0.0051	0.0143	0.0042	0.001	0.0019	0.0071	0.0214
JAWA TIMUR	KOTA MOJOKERTO	357600	0.0062	0.0062	0.0051	0.0175	0.0009	0.0023	0.0048	0.008	0.0255
JAWA TIMUR	BLITAR	350500	0.003	0.0062	0.0051	0.0143	0.0042	0.0006	0.0019	0.0067	0.021
JAWA TIMUR	KOTA PROBOLINGGO	357400	0.0126	0.0016	0.0051	0.0193	0.0016	0.0043	0.0048	0.0107	0.03
JAWA TIMUR	MAGETAN	352000	0.003	0.0016	0.0051	0.0097	0.0016	0.0023	0.0019	0.0058	0.0155
JAWA TIMUR	BANYUWANGI	351000	0.0062	0.0062	0.0051	0.0175	0.0042	0.0006	0.0019	0.0067	0.0242
BALI	GIANYAR	510400	0.0126	0.0062	0.0051	0.0239	0.0016	0.0023	0.0019	0.0058	0.0297
BALI	BADUNG	510301	0.0247	0.0062	0.0051	0.036	0.0016	0.001	0.0048	0.0074	0.0434
BALI	KOTA DENPASAR	510302	0.0247	0.0062	0.0079	0.0388	0.0016	0.0023	0.0048	0.0087	0.0475
BALI	TABANAN	510200	0.0062	0.003	0.0051	0.0143	0.0042	0.001	0.0019	0.0071	0.0214
BALI	JEMBRANA	510100	0.0062	0.0062	0.0051	0.0175	0.0042	0.001	0.0048	0.01	0.0275
BALI	BULELENG	510800	0.0062	0.0062	0.0051	0.0175	0.0042	0.001	0.0048	0.01	0.0275
BALI	BANGLI	510600	0.0062	0.003	0.0051	0.0143	0.0016	0.001	0.0019	0.0045	0.0188
KALIMANTAN BARAT	SAMBAS	610100	0.003	0.0133	0.0014	0.0177	0.0042	0.001	0.0019	0.0071	0.0248
KALIMANTAN BARAT	KAPUAS HULU	610600	0.0062	0.0133	0.0051	0.0246	0.0076	0.001	0.0019	0.0105	0.0351
KALIMANTAN BARAT	KETAPANG	610400	0.0062	0.0133	0.0051	0.0246	0.0042	0.0023	0.0019	0.0084	0.033
KALIMANTAN BARAT	SANGGAU	610300	0.0062	0.0222	0.0051	0.0335	0.0076	0.0043	0.0008	0.0127	0.0462
KALIMANTAN BARAT	PONTIANAK	610200	0.0062	0.003	0.0051	0.0143	0.0042	0.0069	0.0008	0.0119	0.0262
KALIMANTAN TENGAH	BARITO UTARA	620500	0.0247	0.0133	0.0051	0.0431	0.0076	0.001	0.0008	0.0094	0.0525
KALIMANTAN TENGAH	BARITO SELATAN	620400	0.0126	0.0062	0.0051	0.0239	0.0076	0.001	0.0019	0.0105	0.0344
KALIMANTAN TENGAH	KAPUAS	620300	0.0062	0.003	0.0051	0.0143	0.0076	0.0023	0.0008	0.0107	0.025
KALIMANTAN SELATAN	HULU SUNGAI SELATAN	630600	0.0062	0.003	0.0051	0.0143	0.0042	0.001	0.0019	0.0071	0.0214
KALIMANTAN SELATAN	TAPIN	630500	0.0062	0.0133	0.0051	0.0246	0.0042	0.001	0.0019	0.0071	0.0317
KALIMANTAN SELATAN	TABALONG	630900	0.0126	0.0222	0.0051	0.0399	0.0076	0.0006	0.0004	0.0086	0.0485
KALIMANTAN SELATAN	HULU SUNGAI TENGAH	630700	0.003	0.0222	0.0051	0.0303	0.0076	0.001	0.0004	0.009	0.0393
KALIMANTAN SELATAN	HULU SUNGAI UTARA	630800	0.0247	0.0016	0.0051	0.0314	0.0042	0.001	0.0019	0.0071	0.0385
KALIMANTAN SELATAN	TANAH LAUT	630100	0.0126	0.0016	0.0051	0.0193	0.0042	0.0023	0.0019	0.0084	0.0277
KALIMANTAN TIMUR	KOTA BALIKPAPAN	647100	0.0247	0.0222	0.0079	0.0548	0.0016	0.0069	0.0019	0.0104	0.0652
KALIMANTAN TIMUR	BERAU	640300	0.0247	0.0222	0.0051	0.052	0.0076	0.0023	0.0004	0.0103	0.0623
KALIMANTAN TIMUR	KUTAI	640200	0.0126	0.0222	0.0051	0.0399	0.0076	0.0006	0.0004	0.0086	0.0485
KALIMANTAN TIMUR	KOTA SAMARINDA	647200	0.0247	0.0133	0.0079	0.0459	0.0009	0.0043	0.0048	0.01	0.0559
KALIMANTAN TIMUR	PASIR	640100	0.0247	0.0133	0.0051	0.0431	0.0076	0.0023	0.0004	0.0103	0.0534
SULAWESI UTARA	KOTA MANADO	717200	0.0126	0.0133	0.0079	0.0338	0.0016	0.0023	0.0048	0.0087	0.0425
SULAWESI UTARA	KOTA BITUNG	710302	0.0126	0.0222	0.0051	0.0399	0.0016	0.0043	0.0019	0.0078	0.0477
SULAWESI UTARA	MINAHASA	710300	0.0062	0.0222	0.0079	0.0363	0.0076	0.0023	0.0008	0.0107	0.047
SULAWESI UTARA	SANGIHE TALAUD	710400	0.0062	0.0222	0.0051	0.0335	0.0076	0.001	0.0019	0.0105	0.044
GORONTALO	GORONTALO	710100	0.0016	0.0016	0.0051	0.0083	0.0042	0.0023	0.0019	0.0084	0.0167
GORONTALO	KOTA GORONTALO	717100	0.003	0.0222	0.0051	0.0303	0.0016	0.001	0.0048	0.0074	0.0377
SULAWESI TENGAH	POSO	720200	0.0016	0.0062	0.0051	0.0129	0.0076	0.0023	0.0004	0.0103	0.0232
SULAWESI TENGAH	BANGGAI	720100	0.003	0.0222	0.0051	0.0303	0.0076	0.0023	0.0008	0.0107	0.041
SULAWESI TENGAH	TOLI TOLI	720400	0.003	0.0222	0.0051	0.0303	0.0076	0.001	0.0008	0.0094	0.0397
SULAWESI TENGAH	DONGGALA	720300	0.003	0.0062	0.0051	0.0143	0.0076	0.001	0.0004	0.009	0.0233
SULAWESI TENGAH	MOROWALI	720200	0.0062	0.0133	0	0.0195	0.0076	0.001	0.0008	0.0094	0.0289
SULAWESI TENGGARA	KOLAKA	740400	0.0126	0.0062	0.0051	0.0239	0.0076	0.0023	0.0008	0.0107	0.0346
SULAWESI TENGGARA	BUTON	740100	0.003	0.0016	0.0051	0.0097	0.0042	0.0023	0.0019	0.0084	0.0181
SULAWESI SELATAN	KOTA PARE-PARE	737200	0.0062	0.0133	0.0079	0.0274	0.0016	0.001	0.0048	0.0074	0.0348
SULAWESI SELATAN	PANGKAJENE KEPULAUAN	730900	0.0062	0.0133	0.0051	0.0246	0.0042	0.0069	0.0004	0.0115	0.0361
SULAWESI SELATAN	PINRANG	731500	0.0062	0.003	0.0051	0.0143	0.0076	0.001	0.0004	0.009	0.0233
SULAWESI SELATAN	TANA TORAJA	731800	0.0016	0.0062	0.0051	0.0129	0.0042	0.001	0.0008	0.006	0.0189
SULAWESI SELATAN	MAJENE	732000	0.0062	0.0062	0.0051	0.0175	0.0076	0.001	0.0008	0.0094	0.0269
SULAWESI SELATAN	LUWU	731700	0.0016	0.0016	0.0051	0.0083	0.0076	0.0023	0.0004	0.0103	0.0186
NUSA TENGGARA BARAT	LOMBOK BARAT	520101	0.003	0.003	0.0008	0.0068	0.0042	0.001	0.0019	0.0071	0.0139
NUSA TENGGARA BARAT	BIMA	520600	0.003	0.0062	0.0014	0.0106	0.0042	0.001	0.0019	0.0071	0.0177
NUSA TENGGARA BARAT	KOTA MATARAM	520102	0.0062	0.0133	0.0051	0.0246	0.0009	0.0023	0.0048	0.008	0.0326
NUSA TENGGARA TIMUR	ENDE	531000	0.0016	0.0062	0.0014	0.0092	0.0042	0.001	0.0019	0.0071	0.0163
NUSA TENGGARA TIMUR	FLORES TIMUR	530800	0.0016	0.0062	0.0014	0.0092	0.0042	0.0006	0.0019	0.0067	0.0159
NUSA TENGGARA TIMUR	KOTA KUPANG	530302	0.0062	0.0016	0.0051	0.0129	0.0016	0.0023	0.0048	0.0087	0.0216
NUSA TENGGARA TIMUR	TIMOR TENGAH UTARA	530500	0.0016	0.0062	0.0008	0.0086	0.0042	0.001	0.0008	0.006	0.0146
NUSA TENGGARA TIMUR	TIMOR TENGAH SELATAN	530400	0.0016	0.0062	0.0008	0.0086	0.0042	0.0006	0.0008	0.0056	0.0142
PAPUA	FAKFAK	820500	0.003	0.0222	0.0051	0.0303	0.0076	0.0043	0.0008	0.0127	0.043
PAPUA	MANOKWARI	820700	0.0062	0.003	0.0051	0.0143	0.0076	0.0023	0.0004	0.0103	0.0246

## Sheet: labprod_02
prov_kppod_02	kab_kppod_02	kabID97	prodage_pop_02	jhighw_totw_02	seek_labforce_02	subtot_manpav_02	minwage_cpi_02	salary_cpi_02	subtot_labcost_02	Mfvaladd_Mfwork_02	tot_labprod_02
SUMATERA UTARA	DELI SERDANG	121000	0.0019	0.0025	0.0031	0.0075	0.006	0.002	0.008	0.0066	0.0221
SUMATERA UTARA	LANGKAT	121100	0.0015	0.0027	0.0008	0.005	0.006	0.0088	0.0148	0.014	0.0338
SUMATERA UTARA	KOTA SIBOLGA	127100	0.0015	0.0032	0.0113	0.016	0.0015	0.002	0.0035	0.0273	0.0468
SUMATERA UTARA	ASAHAN	120600	0.0006	0.0027	0.0008	0.0041	0.006	0.0088	0.0148	0.0273	0.0462
SUMATERA UTARA	DAIRI	120800	0.0006	0.0025	0.0015	0.0046	0.006	0.002	0.008	0.0028	0.0154
SUMATERA UTARA	KOTA PEMATANG SIANTAR	127300	0.0015	0.0032	0.0008	0.0055	0.006	0.0088	0.0148	0.0273	0.0476
SUMATERA UTARA	KOTA MEDAN	127500	0.0025	0.0032	0.0113	0.017	0.006	0.002	0.008	0.014	0.039
SUMATERA UTARA	KOTA TANJUNG BALAI	127200	0.0015	0.0025	0.0113	0.0153	0.006	0.0088	0.0148	0.014	0.0441
SUMATERA UTARA	KOTA TEBING TINGGI	127400	0.0019	0.0032	0.0113	0.0164	0.006	0.002	0.008	0.014	0.0384
SUMATERA UTARA	SIMALUNGUN	120700	0.0015	0.0027	0.0031	0.0073	0.006	0.002	0.008	0.0273	0.0426
SUMATERA UTARA	KOTA BINJAI	127600	0.0025	0.0032	0.0113	0.017	0.006	0.0088	0.0148	0.0066	0.0384
SUMATERA BARAT	PESISIR SELATAN	130100	0.0006	0.0027	0.0031	0.0064	0.0022	0.002	0.0042	0.014	0.0246
SUMATERA BARAT	KOTA SAWAH LUNTO	130302	0.0015	0.0025	0.0015	0.0055	0.0022	0.0088	0.011	0.014	0.0305
SUMATERA BARAT	KOTA PADANG	137100	0.0025	0.0032	0.0113	0.017	0.0022	0.0014	0.0036	0.0273	0.0479
SUMATERA BARAT	SAWAHLUNTO/SIJUNJUNG	130300	0.0006	0.0009	0.0008	0.0023	0.0022	0.002	0.0042	0.0028	0.0093
R I A U	INDRAGIRI HILIR	140200	0.0019	0.0027	0.0015	0.0061	0.006	0.0088	0.0148	0.014	0.0349
R I A U	KOTA BATAM	147200	0.0034	0.0032	0.0031	0.0097	0.0022	0.002	0.0042	0.0273	0.0412
R I A U	BENGKALIS	140500	0.0019	0.0027	0.0068	0.0114	0.006	0.002	0.008	0.0028	0.0222
R I A U	KAMPAR	140400	0.0015	0.0027	0.0015	0.0057	0.006	0.002	0.008	0.0028	0.0165
R I A U	KOTA PEKAN BARU	147100	0.0034	0.0032	0.0113	0.0179	0.006	0.0014	0.0074	0.0066	0.0319
J A M B I	BATANGHARI	150400	0.0015	0.0027	0.0031	0.0073	0.006	0.002	0.008	0.0028	0.0181
J A M B I	KERINCI	150100	0.0025	0.0027	0.0015	0.0067	0.006	0.002	0.008	0.0028	0.0175
J A M B I	BUNGOTEBO	150200	0.0006	0.0009	0.0015	0.003	0.006	0.0088	0.0148	0.0028	0.0206
SUMATERA SELATAN	OGAN KOMERING ILIR	160200	0.0015	0.0004	0.0015	0.0034	0.0029	0.002	0.0049	0.0066	0.0149
SUMATERA SELATAN	KOTA PALEMBANG	167100	0.0034	0.0032	0.0113	0.0179	0.0029	0.0088	0.0117	0.0273	0.0569
SUMATERA SELATAN	MUARA ENIM	160300	0.0015	0.0027	0.0031	0.0073	0.0029	0.0088	0.0117	0.014	0.033
SUMATERA SELATAN	MUSI BANYUASIN	160600	0.0006	0.0009	0.0008	0.0023	0.0029	0.0088	0.0117	0.0273	0.0413
SUMATERA SELATAN	MUSI RAWAS	160500	0.0019	0.0009	0.0015	0.0043	0.0029	0.0088	0.0117	0.014	0.03
BANGKA BELITUNG	KOTA PANGKAL PINANG	167200	0.0019	0.0025	0.0031	0.0075	0.0029	0.0088	0.0117	0.0066	0.0258
BANGKA BELITUNG	BANGKA	160700	0.0019	0.0009	0.0008	0.0036	0.0029	0.0088	0.0117	0.0273	0.0426
BENGKULU	BENGKULU SELATAN	170100	0.0015	0.0009	0.0008	0.0032	0.006	0.002	0.008	0.0028	0.014
BENGKULU	KOTA BENGKULU	177100	0.0019	0.0032	0.0031	0.0082	0.006	0.002	0.008	0.0028	0.019
LAMPUNG	LAMPUNG SELATAN	180101	0.0006	0.0009	0.0015	0.003	0.0029	0.002	0.0049	0.0066	0.0145
LAMPUNG	LAMPUNG TIMUR	180200	0.0034	0.0032	0.0113	0.0179	0.0029	0.0014	0.0043	0.0028	0.025
LAMPUNG	KOTA BANDAR LAMPUNG	187100	0.0034	0.0032	0.0113	0.0179	0.0029	0.0088	0.0117	0.0273	0.0569
LAMPUNG	LAMPUNG BARAT	180302	0.0006	0.0009	0.0008	0.0023	0.0029	0.002	0.0049	0.0066	0.0138
BANTEN	TANGERANG	321901	0.0019	0.0025	0.0113	0.0157	0.0015	0.0088	0.0103	0.014	0.04
BANTEN	SERANG	322000	0.0006	0.0027	0.0113	0.0146	0.006	0.0088	0.0148	0.014	0.0434
BANTEN	KOTA TANGERANG	321902	0.0034	0.0032	0.0113	0.0179	0.0015	0.002	0.0035	0.0273	0.0487
BANTEN	LEBAK	320200	0.0006	0.0004	0.0068	0.0078	0.006	0.002	0.008	0.0066	0.0224
JAWA BARAT	CIAMIS	320900	0.0025	0.0009	0.0031	0.0065	0.0029	0.0088	0.0117	0.0028	0.021
JAWA BARAT	SUKABUMI	320400	0.0019	0.0004	0.0031	0.0054	0.0029	0.002	0.0049	0.0028	0.0131
JAWA BARAT	KUNINGAN	321000	0.0025	0.0004	0.0068	0.0097	0.0029	0.002	0.0049	0.0028	0.0174
JAWA BARAT	GARUT	320700	0.0015	0.0009	0.0113	0.0137	0.0029	0.002	0.0049	0.0028	0.0214
JAWA BARAT	CIREBON	321100	0.0025	0.0009	0.0068	0.0102	0.0029	0.0088	0.0117	0.0028	0.0247
JAWA BARAT	SUMEDANG	321300	0.0019	0.0009	0.0031	0.0059	0.0022	0.0088	0.011	0.0028	0.0197
JAWA BARAT	TASIKMALAYA	320800	0.0019	0.0004	0.0031	0.0054	0.0018	0.0021	0.0039	0.0028	0.0121
JAWA BARAT	KOTA BEKASI	321802	0.0034	0.0032	0.0113	0.0179	0.0015	0.0014	0.0029	0.014	0.0348
JAWA BARAT	KOTA BOGOR	327100	0.0034	0.0032	0.0113	0.0179	0.0015	0.002	0.0035	0.0066	0.028
JAWA BARAT	KOTA CIREBON	327400	0.0034	0.0032	0.0031	0.0097	0.006	0.0088	0.0148	0.0273	0.0518
JAWA BARAT	BOGOR	320300	0.0019	0.0027	0.0113	0.0159	0.0015	0.0088	0.0103	0.0066	0.0328
JAWA BARAT	KOTA SUKABUMI	327200	0.0034	0.0032	0.0113	0.0179	0.0029	0.0088	0.0117	0.0028	0.0324
JAWA BARAT	KARAWANG	321700	0.0034	0.0027	0.0113	0.0174	0.0015	0.0088	0.0103	0.0066	0.0343
JAWA BARAT	BEKASI	321801	0.0019	0.0027	0.0031	0.0077	0.0015	0.0088	0.0103	0.0273	0.0453
JAWA BARAT	INDRAMAYU	321400	0.0019	0.0004	0.0031	0.0054	0.0029	0.0088	0.0117	0.0273	0.0444
JAWA TENGAH	KOTA SEMARANG	337400	0.0034	0.0032	0.0113	0.0179	0.0029	0.0088	0.0117	0.014	0.0436
JAWA TENGAH	KENDAL	332400	0.0019	0.0009	0.0031	0.0059	0.0029	0.002	0.0049	0.014	0.0248
JAWA TENGAH	PEMALANG	332700	0.0015	0.0004	0.0113	0.0132	0.006	0.002	0.008	0.0028	0.024
JAWA TENGAH	KOTA PEKALONGAN	337500	0.0019	0.0027	0.0031	0.0077	0.006	0.0088	0.0148	0.0028	0.0253
JAWA TENGAH	PEKALONGAN	332600	0.0015	0.0009	0.0031	0.0055	0.006	0.002	0.008	0.0028	0.0163
JAWA TENGAH	MAGELANG	330800	0.0025	0.0009	0.0015	0.0049	0.006	0.002	0.008	0.0028	0.0157
JAWA TENGAH	TEGAL	332800	0.0019	0.0004	0.0068	0.0091	0.006	0.002	0.008	0.0028	0.0199
JAWA TENGAH	KOTA TEGAL	337600	0.0025	0.0025	0.0113	0.0163	0.006	0.0088	0.0148	0.0066	0.0377
JAWA TENGAH	SUKOHARJO	331100	0.0025	0.0025	0.0068	0.0118	0.0018	0.002	0.0038	0.0028	0.0184
D.I. YOGYAKARTA	KOTA YOGYAKARTA	347100	0.0034	0.0032	0.0068	0.0134	0.006	0.0014	0.0074	0.0066	0.0274
JAWA TIMUR	BANGKALAN	352600	0.0025	0.0004	0.0015	0.0044	0.0029	0.0088	0.0117	0.0028	0.0189
JAWA TIMUR	PAMEKASAN	352800	0.0025	0.0004	0.0015	0.0044	0.0018	0.0021	0.0039	0.0019	0.0102
JAWA TIMUR	KOTA MALANG	357300	0.0034	0.0032	0.0113	0.0179	0.0022	0.0088	0.011	0.0273	0.0562
JAWA TIMUR	SIDOARJO	351500	0.0034	0.0032	0.0031	0.0097	0.006	0.0088	0.0148	0.0066	0.0311
JAWA TIMUR	KOTA SURABAYA	357800	0.0034	0.0032	0.0031	0.0097	0.006	0.0088	0.0148	0.0273	0.0518
JAWA TIMUR	PASURUAN	351400	0.0025	0.0009	0.0031	0.0065	0.006	0.002	0.008	0.0028	0.0173
JAWA TIMUR	MOJOKERTO	351600	0.0025	0.0027	0.0031	0.0083	0.006	0.0088	0.0148	0.0028	0.0259
JAWA TIMUR	KOTA KEDIRI	357100	0.0034	0.0025	0.0068	0.0127	0.0029	0.0088	0.0117	0.0273	0.0517
JAWA TIMUR	KEDIRI	350600	0.0025	0.0009	0.0031	0.0065	0.0029	0.0021	0.005	0.0028	0.0143
JAWA TIMUR	KOTA MOJOKERTO	357600	0.0034	0.0032	0.0068	0.0134	0.006	0.0088	0.0148	0.0028	0.031
JAWA TIMUR	BLITAR	350500	0.0025	0.0009	0.0015	0.0049	0.0029	0.002	0.0049	0.0028	0.0126
JAWA TIMUR	KOTA PROBOLINGGO	357400	0.0025	0.0025	0.0031	0.0081	0.006	0.0088	0.0148	0.014	0.0369
JAWA TIMUR	MAGETAN	352000	0.0025	0.0027	0.0031	0.0083	0.0018	0.0021	0.0039	0.0028	0.015
JAWA TIMUR	BANYUWANGI	351000	0.0034	0.0009	0.0015	0.0058	0.0018	0.0088	0.0106	0.0028	0.0192
BALI	GIANYAR	510400	0.0034	0.0025	0.0008	0.0067	0.006	0.0088	0.0148	0.0028	0.0243
BALI	BADUNG	510301	0.0034	0.0032	0.0015	0.0081	0.006	0.002	0.008	0.0028	0.0189
BALI	KOTA DENPASAR	510302	0.0034	0.0032	0.0015	0.0081	0.006	0.0014	0.0074	0.0066	0.0221
BALI	TABANAN	510200	0.0034	0.0027	0.0015	0.0076	0.006	0.0088	0.0148	0.0028	0.0252
BALI	JEMBRANA	510100	0.0034	0.0027	0.0031	0.0092	0.006	0.0088	0.0148	0.0028	0.0268
BALI	BULELENG	510800	0.0025	0.0027	0.0015	0.0067	0.006	0.002	0.008	0.0066	0.0213
BALI	BANGLI	510600	0.0025	0.0009	0.0008	0.0042	0.006	0.0088	0.0148	0.0028	0.0218
KALIMANTAN BARAT	SAMBAS	610100	0.0015	0.0009	0.0031	0.0055	0.0022	0.0088	0.011	0.0028	0.0193
KALIMANTAN BARAT	KAPUAS HULU	610600	0.0025	0.0027	0.0015	0.0067	0.0029	0.0088	0.0117	0.0028	0.0212
KALIMANTAN BARAT	KETAPANG	610400	0.0015	0.0009	0.0015	0.0039	0.0029	0.002	0.0049	0.0066	0.0154
KALIMANTAN BARAT	SANGGAU	610300	0.0019	0.0009	0.0008	0.0036	0.0029	0.0088	0.0117	0.0273	0.0426
KALIMANTAN BARAT	PONTIANAK	610200	0.0006	0.0009	0.0015	0.003	0.0022	0.002	0.0042	0.0273	0.0345
KALIMANTAN TENGAH	BARITO UTARA	620500	0.0019	0.0027	0.0008	0.0054	0.006	0.002	0.008	0.0066	0.02
KALIMANTAN TENGAH	BARITO SELATAN	620400	0.0019	0.0027	0.0008	0.0054	0.006	0.0088	0.0148	0.0066	0.0268
KALIMANTAN TENGAH	KAPUAS	620300	0.0019	0.0027	0.0015	0.0061	0.006	0.002	0.008	0.0066	0.0207
KALIMANTAN SELATAN	HULU SUNGAI SELATAN	630600	0.0019	0.0009	0.0031	0.0059	0.0015	0.0088	0.0103	0.0028	0.019
KALIMANTAN SELATAN	TAPIN	630500	0.0025	0.0004	0.0015	0.0044	0.0015	0.002	0.0035	0.0028	0.0107
KALIMANTAN SELATAN	TABALONG	630900	0.0025	0.0027	0.0008	0.006	0.0015	0.0014	0.0029	0.0028	0.0117
KALIMANTAN SELATAN	HULU SUNGAI TENGAH	630700	0.0019	0.0004	0.0008	0.0031	0.0015	0.0088	0.0103	0.0028	0.0162
KALIMANTAN SELATAN	HULU SUNGAI UTARA	630800	0.0019	0.0009	0.0008	0.0036	0.0015	0.0088	0.0103	0.0066	0.0205
KALIMANTAN SELATAN	TANAH LAUT	630100	0.0019	0.0009	0.0015	0.0043	0.0015	0.0088	0.0103	0.014	0.0286
KALIMANTAN TIMUR	KOTA BALIKPAPAN	647100	0.0034	0.0032	0.0113	0.0179	0.0015	0.0014	0.0029	0.0273	0.0481
KALIMANTAN TIMUR	BERAU	640300	0.0025	0.0027	0.0031	0.0083	0.0015	0.0088	0.0103	0.0273	0.0459
KALIMANTAN TIMUR	KUTAI	640200	0.0019	0.0027	0.0031	0.0077	0.0015	0.0014	0.0029	0.0066	0.0172
KALIMANTAN TIMUR	KOTA SAMARINDA	647200	0.0034	0.0032	0.0031	0.0097	0.0015	0.0014	0.0029	0.0273	0.0399
KALIMANTAN TIMUR	PASIR	640100	0.0019	0.0009	0.0015	0.0043	0.0015	0.002	0.0035	0.0066	0.0144
SULAWESI UTARA	KOTA MANADO	717200	0.0034	0.0032	0.0113	0.0179	0.006	0.0088	0.0148	0.014	0.0467
SULAWESI UTARA	KOTA BITUNG	710302	0.0034	0.0032	0.0068	0.0134	0.006	0.002	0.008	0.014	0.0354
SULAWESI UTARA	MINAHASA	710300	0.0034	0.0025	0.0031	0.009	0.006	0.0088	0.0148	0.0066	0.0304
SULAWESI UTARA	SANGIHE TALAUD	710400	0.0019	0.0027	0.0015	0.0061	0.006	0.0021	0.0081	0.0028	0.017
GORONTALO	GORONTALO	710100	0.0019	0.0009	0.0031	0.0059	0.006	0.002	0.008	0.0028	0.0167
GORONTALO	KOTA GORONTALO	717100	0.0025	0.0025	0.0113	0.0163	0.006	0.002	0.008	0.0028	0.0271
SULAWESI TENGAH	POSO	720200	0.0015	0.0027	0.0015	0.0057	0.0018	0.0021	0.0039	0.0066	0.0162
SULAWESI TENGAH	BANGGAI	720100	0.0019	0.0027	0.0015	0.0061	0.0018	0.0088	0.0106	0.0028	0.0195
SULAWESI TENGAH	TOLI TOLI	720400	0.0019	0.0027	0.0031	0.0077	0.0018	0.0021	0.0039	0.0028	0.0144
SULAWESI TENGAH	DONGGALA	720300	0.0006	0.0009	0.0008	0.0023	0.0018	0.002	0.0038	0.0066	0.0127
SULAWESI TENGAH	MOROWALI	720200	0.0006	0.0009	0.0015	0.003	0.0018	0	0.0018	0.0066	0.0114
SULAWESI TENGGARA	KOLAKA	740400	0.0015	0.0027	0.0015	0.0057	0.0029	0.0088	0.0117	0.0273	0.0447
SULAWESI TENGGARA	BUTON	740100	0.0006	0.0027	0.0031	0.0064	0.0018	0	0.0018	0.0028	0.011
SULAWESI SELATAN	KOTA PARE-PARE	737200	0.0019	0.0032	0.0068	0.0119	0.006	0.0088	0.0148	0.0028	0.0295
SULAWESI SELATAN	PANGKAJENE KEPULAUAN	730900	0.0019	0.0009	0.0068	0.0096	0.006	0.0088	0.0148	0.0273	0.0517
SULAWESI SELATAN	PINRANG	731500	0.0015	0.0027	0.0015	0.0057	0.006	0.002	0.008	0.0066	0.0203
SULAWESI SELATAN	TANA TORAJA	731800	0.0006	0.0027	0.0015	0.0048	0.006	0.002	0.008	0.0028	0.0156
SULAWESI SELATAN	MAJENE	732000	0.0006	0.0027	0.0015	0.0048	0.006	0.002	0.008	0.0028	0.0156
SULAWESI SELATAN	LUWU	731700	0.0015	0.0027	0.0015	0.0057	0.0029	0.0014	0.0043	0.0028	0.0128
NUSA TENGGARA BARAT	LOMBOK BARAT	520101	0.0015	0.0004	0.0015	0.0034	0.0029	0.0021	0.005	0.0028	0.0112
NUSA TENGGARA BARAT	BIMA	520600	0.0006	0.0027	0.0031	0.0064	0.0029	0.002	0.0049	0.0028	0.0141
NUSA TENGGARA BARAT	KOTA MATARAM	520102	0.0025	0.0025	0.0068	0.0118	0.0029	0.0088	0.0117	0.0066	0.0301
NUSA TENGGARA TIMUR	ENDE	531000	0.0006	0.0004	0.0015	0.0025	0.006	0.002	0.008	0.0019	0.0124
NUSA TENGGARA TIMUR	FLORES TIMUR	530800	0.0006	0.0004	0.0008	0.0018	0.006	0.002	0.008	0.0028	0.0126
NUSA TENGGARA TIMUR	KOTA KUPANG	530302	0.0034	0.0032	0.0113	0.0179	0.006	0.0088	0.0148	0.0028	0.0355
NUSA TENGGARA TIMUR	TIMOR TENGAH UTARA	530500	0.0006	0.0004	0.0008	0.0018	0.006	0.002	0.008	0.0019	0.0117
NUSA TENGGARA TIMUR	TIMOR TENGAH SELATAN	530400	0.0006	0.0004	0.0008	0.0018	0.006	0.002	0.008	0.0028	0.0126
PAPUA	FAKFAK	820500	0.0015	0.0027	0.0031	0.0073	0.0022	0.0014	0.0036	0.0273	0.0382
PAPUA	MANOKWARI	820700	0.0006	0.0009	0.0015	0.003	0.0022	0.0088	0.011	0.0066	0.0206
