# Supplementary material for: Democratization, leader education and growth: firm-level evidence from Indonesia
Source: Springer Nature journal article supplement (doi:10.1007/s10887-022-09221-5), 2023-02-15
Supplement: MOESM2 [file kppod_2003.xlsx]

## Sheet: infra_03
prov_kppod_03	kab_kppod_03	kabID97	av_street_03	av_seaport_03	av_airport_03	av_telserv_03	av_elecserv_03	subtot_avinfra_03	qu_street_03	qu_seaport_03	qu_airport_03	qu_telserv_03	qu_elecserv_03	subtot_quinfra_03	tot_infra_03
JAWA TIMUR	GRESIK	352500	0.004	0.0051	0.0017	0.0071	0.007	0.0249	0.0035	0.0031	0.0022	0.0074	0.0052	0.0214	0.0463
JAWA BARAT	BEKASI	321801	0.004	0.0051	0.0017	0.0071	0.0057	0.0236	0.0035	0.0035	0.0026	0.0074	0.0052	0.0222	0.0458
BALI	GIANYAR	510400	0.0066	0.0038	0.0017	0.0044	0.007	0.0235	0.0035	0.0031	0.0026	0.0074	0.0052	0.0218	0.0453
JAWA TENGAH	TEGAL	332800	0.0066	0.0051	0.0006	0.0071	0.0057	0.0251	0.0035	0.0014	0.0022	0.0074	0.0052	0.0197	0.0448
SULAWESI SELATAN	GOWA	730600	0.0005	0.0038	0.0017	0.0071	0.007	0.0201	0.0035	0.0031	0.0022	0.0074	0.0052	0.0214	0.0415
JAWA BARAT	CIANJUR	320500	0.004	0.0033	0.0017	0.0071	0.0057	0.0218	0.0035	0.0006	0.0026	0.0074	0.0052	0.0193	0.0411
SULAWESI SELATAN	MAROS	730800	0.004	0.0038	0.0017	0.0044	0.0057	0.0196	0.0035	0.0031	0.0022	0.0074	0.0052	0.0214	0.041
BANTEN	TANGERANG	321901	0.0018	0.0051	0.0017	0.0044	0.0057	0.0187	0.0035	0.0035	0.0026	0.0074	0.0052	0.0222	0.0409
JAWA TIMUR	MAGETAN	352000	0.0066	0.0013	0.0006	0.0071	0.007	0.0226	0.0018	0.0006	0.0022	0.0074	0.0052	0.0172	0.0398
SULAWESI SELATAN	JENEPONTO	730400	0.0009	0.0033	0.0017	0.0071	0.007	0.02	0.0035	0.0014	0.0022	0.0074	0.0052	0.0197	0.0397
BALI	TABANAN	510200	0.004	0.0033	0.0017	0.0031	0.0057	0.0178	0.0035	0.0031	0.0026	0.0074	0.0052	0.0218	0.0396
JAWA BARAT	KUNINGAN	321000	0.004	0.0033	0.0017	0.0071	0.007	0.0231	0.0018	0.0014	0.0007	0.0074	0.0052	0.0165	0.0396
JAWA BARAT	INDRAMAYU	321400	0.004	0.0013	0.0006	0.0044	0.007	0.0173	0.0035	0.0035	0.0026	0.0074	0.0052	0.0222	0.0395
SULAWESI SELATAN	SINJAI	730700	0.0018	0.0033	0.0017	0.0071	0.0057	0.0196	0.0035	0.0014	0.0022	0.0074	0.0052	0.0197	0.0393
SULAWESI SELATAN	BANTAENG	730300	0.0009	0.0033	0.0003	0.0071	0.007	0.0186	0.0035	0.0014	0.0022	0.0074	0.0052	0.0197	0.0383
SUMATERA BARAT	SAWAHLUNTO SIJUNJUNG	130300	0.0018	0.0033	0.0017	0.0044	0.007	0.0182	0.0035	0.0014	0.0022	0.0074	0.0052	0.0197	0.0379
BALI	BULELENG	510800	0.0018	0.0033	0.0017	0.0044	0.0057	0.0169	0.0035	0.0014	0.0026	0.0074	0.0052	0.0201	0.037
JAWA TENGAH	PEKALONGAN	332600	0.004	0.0033	0.0017	0.0031	0.0057	0.0178	0.0035	0.0006	0.0022	0.0074	0.0052	0.0189	0.0367
JAWA BARAT	TASIKMALAYA	320800	0.0018	0.0013	0.0017	0.0071	0.007	0.0189	0.0035	0.0006	0.0007	0.0074	0.0052	0.0174	0.0363
JAWA TENGAH	KLATEN	331000	0.004	0.0013	0.0017	0.0044	0.0057	0.0171	0.0035	0.0006	0.0022	0.0074	0.0052	0.0189	0.036
SUMATERA BARAT	SOLOK	130200	0.0009	0.0033	0.0017	0.0044	0.0057	0.016	0.0035	0.0014	0.0022	0.0074	0.0052	0.0197	0.0357
JAWA TENGAH	KENDAL	332400	0.004	0.0038	0.0017	0.0031	0.0057	0.0183	0.0035	0.0031	0.0022	0.0033	0.0052	0.0173	0.0356
SULAWESI SELATAN	BONE	731100	0.0005	0.0033	0.0017	0.0071	0.0057	0.0183	0.0006	0.0014	0.0022	0.0074	0.0052	0.0168	0.0351
BANTEN	LEBAK	320200	0.0018	0.0033	0.0017	0.0044	0.0057	0.0169	0.0035	0.0035	0.0026	0.0033	0.0052	0.0181	0.035
SULAWESI SELATAN	ENREKANG	731600	0.0005	0.0013	0.0017	0.0071	0.007	0.0176	0.0018	0.0006	0.0022	0.0074	0.0052	0.0172	0.0348
SULAWESI SELATAN	PINRANG	731500	0.0009	0.0033	0.0006	0.0044	0.0057	0.0149	0.0035	0.0014	0.0022	0.0074	0.0052	0.0197	0.0346
JAWA BARAT	BOGOR	320300	0.004	0.0033	0.0017	0.0044	0.0057	0.0191	0.0035	0.0035	0.0026	0.0033	0.0022	0.0151	0.0342
JAWA BARAT	PURWAKARTA	321600	0.004	0.0033	0.0017	0.0031	0.0057	0.0178	0.0018	0.0035	0.0026	0.0033	0.0052	0.0164	0.0342
BALI	BANGLI	510600	0.0009	0.0038	0.0017	0.0031	0.007	0.0165	0.0035	0.0031	0.0026	0.0033	0.0052	0.0177	0.0342
SULAWESI TENGAH	BANGGAI	720100	0.0005	0.0033	0.0003	0.0071	0.0057	0.0169	0.0018	0.0014	0.0015	0.0074	0.0052	0.0173	0.0342
BANTEN	SERANG	322000	0.0018	0.0051	0.0017	0.0031	0.0029	0.0146	0.0035	0.0035	0.0026	0.0074	0.0022	0.0192	0.0338
SULAWESI UTARA	MINAHASA	710300	0.0009	0.0038	0.0017	0.0044	0.0057	0.0165	0.0018	0.0031	0.0022	0.0074	0.0022	0.0167	0.0332
BALI	BADUNG	510301	0.0066	0.0038	0.0017	0.0031	0.0029	0.0181	0.0035	0.0031	0.0026	0.0033	0.0022	0.0147	0.0328
JAWA BARAT	CIREBON	321100	0.004	0.0038	0.0017	0.0031	0.0057	0.0183	0.0035	0.0014	0.0007	0.0033	0.0052	0.0141	0.0324
JAWA BARAT	KARAWANG	321700	0.004	0.0038	0.0017	0.0044	0.0029	0.0168	0.0035	0.0035	0.0026	0.0033	0.0022	0.0151	0.0319
JAWA TIMUR	JOMBANG	351700	0.004	0.0013	0.0017	0.0031	0.0057	0.0158	0.0035	0.0014	0.0022	0.0033	0.0052	0.0156	0.0314
JAWA BARAT	GARUT	320700	0.0018	0.0013	0.0006	0.0044	0.0057	0.0138	0.0035	0.0006	0.0007	0.0074	0.0052	0.0174	0.0312
BALI	KARANG ASEM	510700	0.0009	0.0038	0.0017	0.0031	0.0057	0.0152	0.0035	0.0014	0.0026	0.0033	0.0052	0.016	0.0312
BALI	JEMBRANA	510100	0.004	0.0038	0.0017	0.001	0.0057	0.0162	0.0035	0.0031	0.0026	0.0033	0.0022	0.0147	0.0309
JAWA BARAT	SUMEDANG	321300	0.004	0.0013	0.0006	0.0031	0.0057	0.0147	0.0018	0.0006	0.0007	0.0074	0.0052	0.0157	0.0304
JAWA TIMUR	SIDOARJO	351500	0.004	0.0038	0.0017	0.0031	0.0029	0.0155	0.0035	0.0031	0.0022	0.0033	0.0022	0.0143	0.0298
SULAWESI SELATAN	MAJENE	732000	0.0009	0.0033	0.0006	0.0044	0.0057	0.0149	0.0035	0.0006	0.0022	0.0033	0.0052	0.0148	0.0297
KALIMANTAN TENGAH	BARITO UTARA	620500	0.0005	0.0013	0.0003	0.0071	0.0057	0.0149	0.0006	0.0006	0.0007	0.0074	0.0052	0.0145	0.0294
SUMATERA SELATAN	MUARA ENIM	160300	0.004	0.0013	0.0017	0.0044	0.0029	0.0143	0.0018	0.0014	0.0022	0.0074	0.0022	0.015	0.0293
JAWA TENGAH	BOYOLALI	330900	0.004	0.0013	0.0017	0.0031	0.0057	0.0158	0.0035	0.0006	0.0022	0.0016	0.0052	0.0131	0.0289
SUMATERA UTARA	TAPANULI UTARA	120400	0.0009	0.0013	0.0006	0.0044	0.0057	0.0129	0.0003	0.0006	0.0022	0.0074	0.0052	0.0157	0.0286
JAWA TENGAH	KUDUS	331900	0.004	0.0033	0.0017	0.0031	0.0029	0.015	0.0035	0.0014	0.0022	0.0033	0.0022	0.0126	0.0276
SULAWESI UTARA	SANGIHE	710400	0.0009	0.0038	0.0006	0.001	0.0057	0.012	0.0035	0.0031	0.0022	0.0016	0.0052	0.0156	0.0276
SULAWESI SELATAN	BARRU	731000	0.004	0.0033	0.0017	0.0031	0.0029	0.015	0.0035	0.0014	0.0022	0.0033	0.0022	0.0126	0.0276
SUMATERA SELATAN	LAHAT	160400	0.0009	0.0006	0.0006	0.0071	0.0029	0.0121	0.0018	0.0014	0.0022	0.0074	0.0022	0.015	0.0271
JAWA TENGAH	BANYUMAS	330200	0.004	0.0013	0.0006	0.0031	0.0029	0.0119	0.0035	0.0006	0.0022	0.0033	0.0052	0.0148	0.0267
NUSA TENGGARA TIMUR	TIMOR TENGAH UTARA	530500	0.0009	0.0013	0.0006	0.0044	0.0029	0.0101	0.0018	0.0006	0.0015	0.0074	0.0052	0.0165	0.0266
JAWA TENGAH	MAGELANG	330800	0.004	0.0013	0.0017	0.0031	0.0057	0.0158	0.0035	0.0006	0.0022	0.0016	0.0022	0.0101	0.0259
JAWA TIMUR	LAMONGAN	352400	0.004	0.0051	0.0017	0.001	0.0029	0.0147	0.0035	0.0014	0.0022	0.0016	0.0022	0.0109	0.0256
SULAWESI TENGGARA	KOLAKA	740400	0.0005	0.0013	0.0017	0.0071	0.0029	0.0135	0.0006	0.0006	0.0007	0.0074	0.0022	0.0115	0.025
SUMATERA UTARA	DELI SERDANG	121000	0.0009	0.0033	0.0017	0.0031	0.0029	0.0119	0.0018	0.0031	0.0022	0.0033	0.0022	0.0126	0.0245
SULAWESI SELATAN	TAKALAR	730500	0.0009	0.0033	0.0017	0.0031	0.0029	0.0119	0.0018	0.0031	0.0022	0.0033	0.0022	0.0126	0.0245
JAWA TENGAH	KEBUMEN	330500	0.0018	0.0013	0.0006	0.0031	0.0057	0.0125	0.0035	0.0006	0.0022	0.0033	0.0022	0.0118	0.0243
NUSA TENGGARA TIMUR	ENDE	531000	0.0009	0.0051	0.0017	0.0031	0.0011	0.0119	0.0006	0.0014	0.0007	0.0074	0.0022	0.0123	0.0242
SULAWESI SELATAN	PANGKAJENE & KEPULAUAN	730900	0.0005	0.0038	0.0006	0.0044	0.0029	0.0122	0.0035	0.0006	0.0022	0.0033	0.0022	0.0118	0.024
JAWA BARAT	CIAMIS	320900	0.0018	0.0013	0.0006	0.0031	0.0029	0.0097	0.0035	0.0014	0.0007	0.0033	0.0052	0.0141	0.0238
JAWA TENGAH	JEPARA	332000	0.004	0.0033	0.0017	0.001	0.0029	0.0129	0.0035	0.0014	0.0022	0.0016	0.0022	0.0109	0.0238
JAWA BARAT	SUKABUMI	320400	0.004	0.0033	0.0017	0.0031	0.0011	0.0132	0.0018	0.0006	0.0026	0.0033	0.0022	0.0105	0.0237
JAWA TENGAH	CILACAP	330100	0.0018	0.0033	0.0017	0.0031	0.0029	0.0128	0.0018	0.0014	0.0022	0.0033	0.0022	0.0109	0.0237
JAWA TIMUR	PASURUAN	351400	0.0018	0.0033	0.0017	0.0031	0.0029	0.0128	0.0018	0.0014	0.0022	0.0033	0.0022	0.0109	0.0237
JAWA TENGAH	KARANG ANYAR	331300	0.004	0.0013	0.0017	0.0031	0.0029	0.013	0.0018	0.0006	0.0022	0.0033	0.0022	0.0101	0.0231
JAWA TENGAH	SUKOHARJO	331100	0.004	0.0033	0.0017	0.001	0.0029	0.0129	0.0035	0.0006	0.0022	0.0016	0.0022	0.0101	0.023
NUSA TENGGARA BARAT	LOMBOK BARAT	520101	0.0018	0.0038	0.0017	0.0031	0.0007	0.0111	0.0035	0.0031	0.0015	0.0033	0.0004	0.0118	0.0229
KALIMANTAN TIMUR	KUTAI KERTANEGARA	640200	0.0009	0.0033	0.0017	0.0031	0.0029	0.0119	0.0018	0.0014	0.0022	0.0033	0.0022	0.0109	0.0228
SUMATERA SELATAN	OGAN KOMERING ILIR	160200	0.0009	0.0033	0.0017	0.0044	0.0029	0.0132	0.0018	0.0014	0.0022	0.0033	0.0008	0.0095	0.0227
KALIMANTAN SELATAN	TANAH LAUT	630100	0.0009	0.0038	0.0017	0.0031	0.0011	0.0106	0.0018	0.0031	0.0015	0.0033	0.0022	0.0119	0.0225
KALIMANTAN TENGAH	KAPUAS	620300	0.0005	0.0033	0.0006	0.0031	0.0029	0.0104	0.0003	0.0014	0.0007	0.0074	0.0022	0.012	0.0224
SULAWESI TENGAH	DONGGALA	720300	0.0005	0.0038	0.0017	0.0031	0.0011	0.0102	0.0018	0.0031	0.0015	0.0033	0.0022	0.0119	0.0221
JAWA TIMUR	MOJOKERTO	351600	0.004	0.0033	0.0017	0.001	0.0029	0.0129	0.0018	0.0014	0.0022	0.0016	0.0022	0.0092	0.0221
SUMATERA UTARA	TANAH KARO	120900	0.0009	0.0033	0.0017	0.0031	0.0029	0.0119	0.0018	0.0006	0.0022	0.0033	0.0022	0.0101	0.022
JAWA TIMUR	BANYUWANGI	351000	0.0018	0.0038	0.0006	0.0031	0.0029	0.0122	0.0006	0.0014	0.0022	0.0033	0.0022	0.0097	0.0219
R I A U	BENGKALIS	140500	0.0009	0.0033	0.0017	0.0031	0.0011	0.0101	0.0006	0.0031	0.0022	0.0033	0.0022	0.0114	0.0215
SULAWESI SELATAN	LUWU UTARA	731700	0.0009	0.0013	0.0006	0.0031	0.0011	0.007	0.0035	0.0031	0.0022	0.0033	0.0022	0.0143	0.0213
JAWA BARAT	SUBANG	321500	0.004	0.0033	0.0017	0.0031	0.0029	0.015	0.0006	0.0006	0.0026	0.0016	0.0008	0.0062	0.0212
NUSA TENGGARA TIMUR	TIMOR TENGAH SELATAN	530400	0.0009	0.0013	0.0006	0.0031	0.0029	0.0088	0.0006	0.0006	0.0015	0.0074	0.0022	0.0123	0.0211
LAMPUNG	LAMPUNG UTARA	180300	0.0009	0.0013	0.0017	0.0031	0.0029	0.0099	0.0035	0.0031	0.0007	0.0016	0.0022	0.0111	0.021
SUMATERA UTARA	DAIRI	120800	0.0009	0.0033	0.0017	0.0031	0.0029	0.0119	0.0006	0.0006	0.0022	0.0033	0.0022	0.0089	0.0208
R I A U	KAMPAR	140400	0.0018	0.0038	0.0017	0.0005	0.0029	0.0107	0.0018	0.0031	0.0022	0.0008	0.0022	0.0101	0.0208
GORONTALO	GORONTALO	710100	0.0009	0.0038	0.0017	0.0031	0.0011	0.0106	0.0018	0.0014	0.0015	0.0033	0.0022	0.0102	0.0208
JAWA TIMUR	BLITAR	350500	0.0018	0.0013	0.0006	0.0005	0.007	0.0112	0.0006	0.0006	0.0022	0.0008	0.0052	0.0094	0.0206
DIY	BANTUL	340200	0.004	0.0013	0.0017	0.0005	0.0029	0.0104	0.0035	0.0006	0.0022	0.0016	0.0022	0.0101	0.0205
NUSA TENGGARA TIMUR	BELU	530600	0.0005	0.0013	0.0003	0.0071	0.0007	0.0099	0.0006	0.0006	0.0015	0.0074	0.0004	0.0105	0.0204
JAWA TENGAH	PEMALANG	332700	0.004	0.0013	0.0006	0.0005	0.0029	0.0093	0.0035	0.0014	0.0022	0.0016	0.0022	0.0109	0.0202
JAWA TIMUR	BANGKALAN	352600	0.0009	0.0033	0.0003	0.0031	0.0029	0.0105	0.0006	0.0014	0.0022	0.0033	0.0022	0.0097	0.0202
SULAWESI TENGAH	POSO	720200	0.0009	0.0038	0.0017	0.0031	0.0011	0.0106	0.0018	0.0006	0.0015	0.0033	0.0022	0.0094	0.02
KALIMANTAN SELATAN	TAPIN	630500	0.0005	0.0033	0.0017	0.0031	0.0011	0.0097	0.0018	0.0014	0.0015	0.0033	0.0022	0.0102	0.0199
R I A U	INDRAGIRI HILIR	140200	0.0018	0.0038	0.0006	0.0031	0.0011	0.0104	0.0018	0.0031	0.0022	0.0016	0.0004	0.0091	0.0195
JAWA BARAT	BANDUNG	320600	0.004	0.0013	0.0017	0.001	0.0029	0.0109	0.0035	0.0006	0.0007	0.0016	0.0022	0.0086	0.0195
SULAWESI TENGGARA	BUTON	740100	0.0009	0.0038	0.0006	0.0031	0.0011	0.0095	0.0006	0.0031	0.0007	0.0033	0.0022	0.0099	0.0194
PAPUA	SORONG	820600	0.0005	0.0051	0.0017	0.0031	0.0007	0.0111	0.0006	0.0031	0.0007	0.0033	0.0004	0.0081	0.0192
BANGKA BELITUNG	BELITUNG	160700	0.0009	0.0038	0.0017	0.0031	0.0029	0.0124	0.0018	0.0006	0.0007	0.0033	0.0004	0.0068	0.0192
KALIMANTAN SELATAN	HULU SUNGAI SELATAN	630600	0.0005	0.0033	0.0017	0.0031	0.0011	0.0097	0.0018	0.0006	0.0015	0.0033	0.0022	0.0094	0.0191
KALIMANTAN SELATAN	HULU SUNGAI TENGAH	630700	0.0005	0.0033	0.0017	0.0031	0.0011	0.0097	0.0018	0.0006	0.0015	0.0033	0.0022	0.0094	0.0191
J A M B I	BUNGO	150200	0.0018	0.0006	0.0003	0.0031	0.0029	0.0087	0.0018	0.0014	0.0015	0.0033	0.0022	0.0102	0.0189
KALIMANTAN SELATAN	HULU SUNGAI UTARA	630800	0.0005	0.0013	0.0017	0.0031	0.0029	0.0095	0.0018	0.0006	0.0015	0.0033	0.0022	0.0094	0.0189
SUMATERA BARAT	PASAMAN	130800	0.0009	0.0006	0.0003	0.0031	0.0029	0.0078	0.0018	0.0014	0.0022	0.0033	0.0022	0.0109	0.0187
JAWA TIMUR	JEMBER	350900	0.004	0.0013	0.0003	0.001	0.0029	0.0095	0.0018	0.0014	0.0022	0.0016	0.0022	0.0092	0.0187
KALIMANTAN BARAT	PONTIANAK	610200	0.0018	0.0038	0.0017	0.001	0.0011	0.0094	0.0003	0.0031	0.0022	0.0033	0.0004	0.0093	0.0187
JAWA TIMUR	PONOROGO	350200	0.004	0.0013	0.0006	0.001	0.0029	0.0098	0.0018	0.0006	0.0022	0.0016	0.0022	0.0084	0.0182
SULAWESI SELATAN	TANA TORAJA	731800	0.0009	0.0006	0.0006	0.0044	0.0029	0.0094	0.0018	0.0006	0.0022	0.0033	0.0008	0.0087	0.0181
KALIMANTAN BARAT	SANGGAU	610300	0.0005	0.0033	0.0003	0.0031	0.0011	0.0083	0.0006	0.0014	0.0022	0.0033	0.0022	0.0097	0.018
PAPUA	MIMIKA	820500	0.0005	0.0033	0.0017	0.0031	0.0011	0.0097	0.0006	0.0014	0.0007	0.0033	0.0022	0.0082	0.0179
KALIMANTAN TIMUR	BULUNGAN	640400	0.0009	0.0038	0.0017	0.0031	0.0007	0.0102	0.0003	0.0014	0.0022	0.0033	0.0004	0.0076	0.0178
KALIMANTAN TIMUR	PASIR	640100	0.0005	0.0038	0.0017	0.001	0.0007	0.0077	0.0006	0.0031	0.0022	0.0033	0.0008	0.01	0.0177
KALIMANTAN BARAT	KETAPANG	610400	0.0009	0.0033	0.0003	0.0031	0.0011	0.0087	0.0003	0.0006	0.0022	0.0033	0.0022	0.0086	0.0173
JAWA TIMUR	KEDIRI	350600	0.004	0.0013	0.0006	0.001	0.0011	0.008	0.0035	0.0006	0.0022	0.0016	0.0008	0.0087	0.0167
SUMATERA UTARA	ASAHAN	120600	0.0009	0.0033	0.0017	0.0031	0.0007	0.0097	0.0003	0.0031	0.0022	0.0008	0.0004	0.0068	0.0165
SULAWESI SELATAN	LUWU	731700	0.0009	0.0013	0.0006	0.0031	0.0011	0.007	0.0018	0.0014	0.0022	0.0033	0.0008	0.0095	0.0165
NUSA TENGGARA BARAT	LOMBOK TIMUR	520300	0.0009	0.0038	0.0017	0.001	0.0007	0.0081	0.0018	0.0031	0.0015	0.0016	0.0004	0.0084	0.0165
JAWA TIMUR	TULUNGAGUNG	350400	0.004	0.0006	0.0006	0.0005	0.0029	0.0086	0.0018	0.0006	0.0022	0.0008	0.0022	0.0076	0.0162
KALIMANTAN TIMUR	NUNUKAN	640400	0.0005	0.0033	0.0003	0.0031	0.0007	0.0079	0.0018	0.0006	0.0022	0.0033	0.0004	0.0083	0.0162
SUMATERA SELATAN	MUSI BANYUASIN	160600	0.0009	0.0033	0.0017	0.001	0.0011	0.008	0.0018	0.0014	0.0022	0.0016	0.0008	0.0078	0.0158
KALIMANTAN SELATAN	TABALONG	630900	0.0005	0.0013	0.0003	0.0031	0.0029	0.0081	0.0018	0.0003	0.0015	0.0033	0.0008	0.0077	0.0158
KALIMANTAN TENGAH	BARITO SELATAN	620400	0.0005	0.0033	0.0003	0.0031	0.0011	0.0083	0.0006	0.0006	0.0007	0.0033	0.0022	0.0074	0.0157
PAPUA	FAKFAK	820500	0.0005	0.0033	0.0006	0.0031	0.0011	0.0086	0.0006	0.0006	0.0003	0.0033	0.0022	0.007	0.0156
DIY	GUNUNG KIDUL	340300	0.0018	0.0013	0.0017	0.0005	0.0029	0.0082	0.0006	0.0006	0.0022	0.0016	0.0022	0.0072	0.0154
KALIMANTAN BARAT	KAPUAS HULU	610600	0.0009	0.0013	0.0003	0.0031	0.0011	0.0067	0.0003	0.0006	0.0022	0.0033	0.0022	0.0086	0.0153
JAWA TIMUR	BONDOWOSO	351100	0.0018	0.0013	0.0003	0.0005	0.0029	0.0068	0.0018	0.0014	0.0022	0.0008	0.0022	0.0084	0.0152
RIAU	PELALAWAN	140400	0.0009	0.0038	0.0017	0.0005	0.0007	0.0076	0.0006	0.0031	0.0022	0.0008	0.0008	0.0075	0.0151
J A M B I	KERINCI	150100	0.0009	0.0006	0.0003	0.0031	0.0029	0.0078	0.0018	0.0014	0.0015	0.0016	0.0008	0.0071	0.0149
LAMPUNG	LAMPUNG SELATAN	180101	0.0009	0.0038	0.0017	0.0005	0.0011	0.008	0.0018	0.0031	0.0007	0.0008	0.0004	0.0068	0.0148
SUMATERA UTARA	SIMALUNGUN	120700	0.0009	0.0033	0.0017	0.0031	0.0007	0.0097	0.0003	0.0014	0.0022	0.0008	0.0004	0.0051	0.0148
BENGKULU	BENGKULU SELATAN	170100	0.0009	0.0033	0.0017	0.001	0.0007	0.0076	0.0035	0.0006	0.0015	0.0008	0.0004	0.0068	0.0144
SUMATERA UTARA	LABUHAN BATU	120500	0.0009	0.0013	0.0003	0.001	0.0029	0.0064	0.0006	0.0014	0.0022	0.0016	0.0022	0.008	0.0144
J A M B I	BATANGHARI	150400	0.0009	0.0033	0.0017	0.0005	0.0029	0.0093	0.0006	0.0014	0.0015	0.0008	0.0008	0.0051	0.0144
JAWA TIMUR	PAMEKASAN	352800	0.0018	0.0013	0.0003	0.0005	0.0029	0.0068	0.0006	0.0014	0.0022	0.0008	0.0022	0.0072	0.014
SUMATERA UTARA	LANGKAT	121100	0.0009	0.0033	0.0017	0.0031	0.0007	0.0097	0.0003	0.0006	0.0022	0.0008	0.0004	0.0043	0.014
LAMPUNG	WAY KANAN	180300	0.0009	0.0006	0.0003	0.001	0.0029	0.0057	0.0006	0.0031	0.0007	0.0016	0.0022	0.0082	0.0139
PAPUA	JAYAWIJAYA	820200	0.0005	0.0013	0.0006	0.0031	0.0011	0.0066	0.0006	0.0006	0.0003	0.0033	0.0022	0.007	0.0136
RIAU	ROKAN HULU	140400	0.0009	0.0006	0.0003	0.0031	0.0007	0.0056	0.0006	0.0031	0.0022	0.0016	0.0004	0.0079	0.0135
SUMATERA BARAT	PESISIR SELATAN	130100	0.0009	0.0013	0.0017	0.0005	0.0007	0.0051	0.0035	0.0014	0.0022	0.0008	0.0004	0.0083	0.0134
SULAWESI SELATAN	SELAYAR	730100	0.0009	0.0038	0.0003	0.001	0.0007	0.0067	0.0018	0.0006	0.0022	0.0016	0.0004	0.0066	0.0133
SULAWESI TENGAH	MOROWALI	720200	0.0005	0.0038	0.0006	0.0005	0.0007	0.0061	0.0018	0.0014	0.0015	0.0016	0.0008	0.0071	0.0132
JAMBI	TANJUNG JABUNG TIMUR	150500	0.0005	0.0033	0.0017	0.0005	0.0007	0.0067	0.0018	0.0014	0.0015	0.0008	0.0004	0.0059	0.0126
NUSA TENGGARA TIMUR	SUMBA BARAT	530100	0.0009	0.0033	0.0017	0.0005	0.0011	0.0075	0.0006	0.0014	0.0007	0.0016	0.0008	0.0051	0.0126
RIAU	KUANTAN SENGGIGI	140100	0.0009	0.0006	0.0003	0.0005	0.0007	0.003	0.0018	0.0031	0.0022	0.0008	0.0008	0.0087	0.0117
KALIMANTAN TIMUR	BERAU	640300	0.0005	0.0033	0.0003	0.0005	0.0007	0.0053	0.0006	0.0014	0.0022	0.0016	0.0004	0.0062	0.0115
NUSA TENGGARA TIMUR	FLORES TIMUR	530800	0.0009	0.0038	0.0017	0.0005	0.0007	0.0076	0.0006	0.0014	0.0007	0.0008	0.0004	0.0039	0.0115
BANGKA BELITUNG	BANGKA	160700	0.0009	0.0033	0.0017	0.0005	0.0007	0.0071	0.0018	0.0006	0.0007	0.0008	0.0004	0.0043	0.0114
NUSA TENGGARA BARAT	BIMA	520600	0.0005	0.0038	0.0017	0.0005	0.0007	0.0072	0.0006	0.0014	0.0007	0.0008	0.0004	0.0039	0.0111
NUSA TENGGARA BARAT	DOMPU	520500	0.0009	0.0033	0.0017	0.0005	0.0007	0.0071	0.0006	0.0014	0.0007	0.0008	0.0004	0.0039	0.011
JAMBI	TEBO	150200	0.0018	0.0013	0.0006	0.0005	0.0007	0.0049	0.0018	0.0014	0.0015	0.0008	0.0004	0.0059	0.0108
SULAWESI TENGAH	TOLI TOLI	720400	0.0009	0.0033	0.0006	0.0005	0.0007	0.006	0.0006	0.0014	0.0015	0.0008	0.0004	0.0047	0.0107
NUSA TENGGARA TIMUR	MANGGARAI	531200	0.0009	0.0033	0.0017	0.0005	0.0007	0.0071	0.0003	0.0014	0.0007	0.0008	0.0004	0.0036	0.0107
KALIMANTAN BARAT	SAMBAS	610100	0.0005	0.0013	0.0003	0.001	0.0007	0.0038	0.0003	0.0006	0.0022	0.0033	0.0003	0.0067	0.0105
LAMPUNG	LAMPUNG TIMUR	180200	0.0009	0.0006	0.0003	0.0005	0.0011	0.0034	0.0018	0.0031	0.0007	0.0008	0.0004	0.0068	0.0102
LAMPUNG	LAMPUNG BARAT	180302	0.0009	0.0006	0.0003	0.0005	0.0007	0.003	0.0018	0.0031	0.0007	0.0008	0.0004	0.0068	0.0098
SUMATERA SELATAN	MUSI RAWAS	160500	0.0009	0.0006	0.0003	0.0005	0.0007	0.003	0.0018	0.0014	0.0022	0.0008	0.0004	0.0066	0.0096
PAPUA	MANOKWARI	820700	0.0005	0.0033	0.0006	0.0005	0.0007	0.0056	0.0006	0.0014	0.0003	0.0008	0.0004	0.0035	0.0091
NUSA TENGGARA TIMUR	NGADA	531100	0.0009	0.0033	0.0006	0.0005	0.0007	0.006	0.0003	0.0006	0.0007	0.0008	0.0004	0.0028	0.0088
KALIMANTAN TIMUR	KUTAI TIMUR	640200	0.0005	0.0006	0.0003	0.0005	0.0007	0.0026	0.0006	0.0006	0.0022	0.0008	0.0004	0.0046	0.0072
KALIMANTAN TIMUR	KOTA SAMARINDA	647200	0.0009	0.0033	0.0017	0.0005	0.0007	0.0071	0.0018	0.0014	0.0015	0.0008	0.0022	0.0077	0.0148
BENGKULU	KOTA BENGKULU	177100	0.0018	0.0033	0.0017	0.0031	0.0007	0.0106	0.0035	0.0006	0.0015	0.0016	0.0004	0.0076	0.0182
SUMATERA UTARA	KOTA TANJUNG BALAI	127200	0.0018	0.0033	0.0017	0.0031	0.0011	0.011	0.0003	0.0014	0.0015	0.0033	0.0022	0.0087	0.0197
BANGKA BELITUNG	KOTA PANGKAL PINANG	167200	0.0018	0.0051	0.0017	0.0005	0.0011	0.0102	0.0035	0.0031	0.0022	0.0008	0.0004	0.01	0.0202
SULAWESI TENGGARA	KOTA KENDARI	740302	0.0018	0.0038	0.0017	0.0031	0.0007	0.0111	0.0003	0.0031	0.0022	0.0033	0.0008	0.0097	0.0208
SULAWESI UTARA	KOTA BITUNG	710302	0.0018	0.0033	0.0017	0.0031	0.0011	0.011	0.0018	0.0014	0.0015	0.0033	0.0022	0.0102	0.0212
SUMATERA SELATAN	KOTA PALEMBANG	167100	0.0018	0.0033	0.0017	0.0031	0.0011	0.011	0.0035	0.0031	0.0026	0.0016	0.0004	0.0112	0.0222
SUMATERA UTARA	KOTA BINJAI	127600	0.0018	0.0033	0.0017	0.0031	0.0029	0.0128	0.0003	0.0014	0.0022	0.0033	0.0022	0.0094	0.0222
GORONTALO	KOTA GORONTALO	717100	0.0005	0.0038	0.0017	0.0031	0.0011	0.0102	0.0035	0.0014	0.0022	0.0033	0.0022	0.0126	0.0228
NUSA TENGGARA BARAT	KOTA MATARAM	520102	0.0018	0.0038	0.0017	0.0031	0.0007	0.0111	0.0035	0.0031	0.0022	0.0033	0.0004	0.0125	0.0236
R I A U	KOTA PEKAN BARU	147100	0.0018	0.0033	0.0017	0.0031	0.0029	0.0128	0.0018	0.0014	0.0026	0.0033	0.0022	0.0113	0.0241
JAWA BARAT	KOTA SUKABUMI	327200	0.004	0.0033	0.0017	0.0031	0.0011	0.0132	0.0035	0.0006	0.0015	0.0033	0.0022	0.0111	0.0243
SUMATERA BARAT	KOTA SAWAH LUNTO	130302	0.0018	0.0033	0.0017	0.0031	0.0029	0.0128	0.0035	0.0014	0.0015	0.0033	0.0022	0.0119	0.0247
R I A U	KOTA DUMAI	140500	0.0018	0.0051	0.0017	0.0031	0.0029	0.0146	0.0006	0.0035	0.0015	0.0033	0.0022	0.0111	0.0257
JAWA TENGAH	KOTA PEKALONGAN	337500	0.0066	0.0033	0.0006	0.0031	0.0029	0.0165	0.0018	0.0014	0.0007	0.0033	0.0022	0.0094	0.0259
SUMATERA UTARA	KOTA PEMATANG SIANTAR	127300	0.0018	0.0033	0.0017	0.0044	0.0029	0.0141	0.0035	0.0014	0.0015	0.0033	0.0022	0.0119	0.026
JAWA TIMUR	KOTA MADIUN	357700	0.0066	0.0013	0.0017	0.0031	0.0029	0.0156	0.0035	0.0014	0.0015	0.0033	0.0022	0.0119	0.0275
LAMPUNG	KOTA BANDAR LAMPUNG	187100	0.0018	0.0051	0.0017	0.0044	0.0029	0.0159	0.0035	0.0031	0.0022	0.0033	0.0008	0.0129	0.0288
KALIMANTAN TIMUR	KOTA BALIKPAPAN	647100	0.0066	0.0038	0.0017	0.0031	0.0011	0.0163	0.0035	0.0014	0.0022	0.0033	0.0022	0.0126	0.0289
SUMATERA UTARA	KOTA TEBING TINGGI	127400	0.0018	0.0006	0.0003	0.0071	0.0057	0.0155	0.0035	0.0003	0.0003	0.0074	0.0022	0.0137	0.0292
JAWA BARAT	KOTA BEKASI	321802	0.004	0.0033	0.0017	0.0044	0.0029	0.0163	0.0018	0.0014	0.0022	0.0074	0.0022	0.015	0.0313
D.I. YOGYAKARTA	KOTA YOGYAKARTA	347100	0.0066	0.0033	0.0017	0.0044	0.0029	0.0189	0.0035	0.0014	0.0022	0.0033	0.0022	0.0126	0.0315
SULAWESI UTARA	KOTA MANADO	717200	0.0018	0.0051	0.0017	0.0044	0.0057	0.0187	0.0018	0.0031	0.0026	0.0033	0.0022	0.013	0.0317
BANTEN	KOTA TANGERANG	321902	0.0066	0.0033	0.0017	0.0044	0.0029	0.0189	0.0035	0.0014	0.0026	0.0033	0.0022	0.013	0.0319
JAWA TENGAH	KOTA TEGAL	337600	0.0066	0.0038	0.0006	0.0044	0.0057	0.0211	0.0035	0.0014	0.0007	0.0033	0.0022	0.0111	0.0322
SUMATERA UTARA	KOTA SIBOLGA	127100	0.0018	0.0051	0.0017	0.0044	0.0029	0.0159	0.0018	0.0035	0.0015	0.0074	0.0022	0.0164	0.0323
JAWA BARAT	KOTA CIREBON	327400	0.004	0.0038	0.0017	0.0044	0.0057	0.0196	0.0018	0.0014	0.0015	0.0033	0.0052	0.0132	0.0328
JAWA BARAT	KOTA BANDUNG	327300	0.004	0.0033	0.0017	0.0044	0.0029	0.0163	0.0035	0.0014	0.0022	0.0074	0.0022	0.0167	0.033
JAWA TIMUR	KOTA MOJOKERTO	357600	0.004	0.0013	0.0006	0.0044	0.0057	0.016	0.0035	0.0006	0.0007	0.0074	0.0052	0.0174	0.0334
JAWA TIMUR	KOTA KEDIRI	357100	0.004	0.0033	0.0017	0.0044	0.0057	0.0191	0.0018	0.0031	0.0015	0.0074	0.0022	0.016	0.0351
SUMATERA UTARA	KOTA MEDAN	127500	0.0018	0.0051	0.0017	0.0044	0.0029	0.0159	0.0035	0.0035	0.0026	0.0074	0.0022	0.0192	0.0351
SULAWESI SELATAN	KOTA PARE-PARE	737200	0.0018	0.0051	0.0017	0.0044	0.0029	0.0159	0.0035	0.0035	0.0015	0.0074	0.0052	0.0211	0.037
NUSA TENGGARA TIMUR	KOTA KUPANG	530302	0.0009	0.0051	0.0017	0.0044	0.0029	0.015	0.0035	0.0035	0.0026	0.0074	0.0052	0.0222	0.0372
BALI	KOTA DENPASAR	510302	0.0066	0.0051	0.0017	0.0031	0.0057	0.0222	0.0035	0.0035	0.0026	0.0033	0.0022	0.0151	0.0373
JAWA TENGAH	KOTA SURAKARTA	337200	0.0066	0.0033	0.0017	0.0044	0.0057	0.0217	0.0035	0.0014	0.0026	0.0033	0.0052	0.016	0.0377
BANTEN	KOTA CILEGON	322000	0.0066	0.0051	0.0017	0.0031	0.0029	0.0194	0.0035	0.0035	0.0022	0.0074	0.0022	0.0188	0.0382
SUMATERA BARAT	KOTA PADANG	137100	0.0018	0.0038	0.0017	0.0071	0.0057	0.0201	0.0035	0.0031	0.0026	0.0074	0.0022	0.0188	0.0389
JAWA TENGAH	KOTA SEMARANG	337400	0.0066	0.0038	0.0017	0.0044	0.0029	0.0194	0.0035	0.0031	0.0026	0.0074	0.0052	0.0218	0.0412
JAWA TIMUR	KOTA MALANG	357300	0.0066	0.0033	0.0017	0.0044	0.0057	0.0217	0.0035	0.0014	0.0022	0.0074	0.0052	0.0197	0.0414
R I A U	KOTA BATAM	147200	0.004	0.0051	0.0017	0.0071	0.0057	0.0236	0.0018	0.0035	0.0026	0.0074	0.0052	0.0205	0.0441
JAWA TIMUR	KOTA PROBOLINGGO	357400	0.004	0.0038	0.0017	0.0071	0.007	0.0236	0.0035	0.0031	0.0015	0.0074	0.0052	0.0207	0.0443
JAWA BARAT	KOTA BOGOR	327100	0.0066	0.0038	0.0017	0.0071	0.0057	0.0249	0.0018	0.0031	0.0022	0.0074	0.0052	0.0197	0.0446
JAWA TIMUR	KOTA SURABAYA	357800	0.0066	0.0038	0.0017	0.0071	0.007	0.0262	0.0035	0.0035	0.0022	0.0074	0.0052	0.0218	0.048
DKI JAKARTA	DKI JAKARTA		0.0066	0.0038	0.0017	0.0071	0.007	0.0262	0.0035	0.0035	0.0026	0.0074	0.0052	0.0222	0.0484

## Sheet: inst_03
prov_kppod_03	kab_kppod_03	kabID97	serv_proc_03	abuse_auth_03	subtot_appserv_03	retrib_tax_03	devbudget_apdb_03	subtot_regfin_03	reg_cons_03	law_enforce_03	illegal_levy_03	exec_leg_03	subtot_lawcert_03	rpolreg_03	tot_inst_03
SULAWESI SELATAN	JENEPONTO	730400	0.0248	0.012	0.0368	0.0031	0.0023	0.0054	0.0165	0.0251	0.0051	0.003	0.0497	0.0217	0.1136
SUMATERA BARAT	SAWAHLUNTO SIJUNJUNG	130300	0.0248	0.012	0.0368	0.0051	0.0023	0.0074	0.0165	0.0251	0.0099	0.003	0.0545	0.0147	0.1134
RIAU	PELALAWAN	140400	0.0248	0.003	0.0278	0.0132	0.0059	0.0191	0.0165	0.0251	0.0051	0.003	0.0497	0.0147	0.1113
JAWA BARAT	CIANJUR	320500	0.0248	0.012	0.0368	0.0051	0.0023	0.0074	0.0165	0.0251	0.0051	0.003	0.0497	0.0147	0.1086
SULAWESI SELATAN	ENREKANG	731600	0.0248	0.006	0.0308	0.0051	0.0023	0.0074	0.0165	0.0251	0.0099	0.003	0.0545	0.0147	0.1074
BALI	JEMBRANA	510100	0.0126	0.012	0.0246	0.0051	0.0009	0.006	0.0165	0.0251	0.0099	0.003	0.0545	0.0217	0.1068
KALIMANTAN TENGAH	BARITO UTARA	620500	0.0248	0.0008	0.0256	0.0051	0.0059	0.011	0.0165	0.0251	0.0099	0.003	0.0545	0.0147	0.1058
JAWA BARAT	TASIKMALAYA	320800	0.0248	0.006	0.0308	0.0031	0.0009	0.004	0.0165	0.0251	0.0099	0.003	0.0545	0.0147	0.104
JAMBI	TANJUNG JABUNG TIMUR	150500	0.0248	0.012	0.0368	0.0051	0.0037	0.0088	0.0054	0.0251	0.0099	0.003	0.0434	0.0147	0.1037
JAWA TIMUR	MAGETAN	352000	0.0248	0.012	0.0368	0.0051	0.0014	0.0065	0.0165	0.0251	0.0099	0.003	0.0545	0.0046	0.1024
JAWA BARAT	KUNINGAN	321000	0.0248	0.003	0.0278	0.002	0.0009	0.0029	0.0165	0.0251	0.0051	0.003	0.0497	0.0217	0.1021
BALI	TABANAN	510200	0.0126	0.006	0.0186	0.0083	0.0023	0.0106	0.0165	0.0251	0.0051	0.003	0.0497	0.0217	0.1006
BALI	BANGLI	510600	0.0126	0.012	0.0246	0.0051	0.0014	0.0065	0.0165	0.0251	0.0099	0.003	0.0545	0.0147	0.1003
NUSA TENGGARA TIMUR	ENDE	531000	0.0126	0.012	0.0246	0.0051	0.0014	0.0065	0.0165	0.0251	0.0099	0.003	0.0545	0.0147	0.1003
JAWA BARAT	PURWAKARTA	321600	0.0248	0.012	0.0368	0.0083	0.0014	0.0097	0.0165	0.007	0.0051	0.003	0.0316	0.0217	0.0998
SULAWESI SELATAN	SINJAI	730700	0.0248	0.006	0.0308	0.002	0.0023	0.0043	0.0165	0.0251	0.0051	0.003	0.0497	0.0147	0.0995
KALIMANTAN TIMUR	BULUNGAN	640400	0.0248	0.006	0.0308	0.0051	0.0059	0.011	0.0054	0.0251	0.0025	0.003	0.036	0.0217	0.0995
KALIMANTAN SELATAN	TABALONG	630900	0.0126	0.006	0.0186	0.0132	0.0023	0.0155	0.0165	0.0251	0.0025	0.003	0.0471	0.0147	0.0959
KALIMANTAN SELATAN	HULU SUNGAI UTARA	630800	0.0126	0.003	0.0156	0.0051	0.0023	0.0074	0.0165	0.0251	0.0051	0.003	0.0497	0.0217	0.0944
NUSA TENGGARA TIMUR	TIMOR TENGAH UTARA	530500	0.0126	0.012	0.0246	0.0031	0.0037	0.0068	0.0165	0.0251	0.0025	0.003	0.0471	0.0147	0.0932
BANGKA BELITUNG	BELITUNG	160700	0.0062	0.012	0.0182	0.0132	0.0014	0.0146	0.0095	0.0151	0.0099	0.003	0.0375	0.0217	0.092
SULAWESI TENGAH	BANGGAI	720100	0.0126	0.0126	0.0252	0.0051	0.0023	0.0074	0.0165	0.0151	0.0099	0.003	0.0445	0.0147	0.0918
SULAWESI TENGAH	TOLI TOLI	720400	0.0126	0.0015	0.0141	0.0132	0.0023	0.0155	0.0054	0.0251	0.0099	0.0043	0.0447	0.0147	0.089
SULAWESI SELATAN	TANA TORAJA	731800	0.0248	0.012	0.0368	0.0051	0.0023	0.0074	0.0054	0.0151	0.0051	0.0043	0.0299	0.0147	0.0888
NUSA TENGGARA TIMUR	TIMOR TENGAH SELATAN	530400	0.0062	0.012	0.0182	0.0031	0.0037	0.0068	0.0095	0.0251	0.0099	0.003	0.0475	0.0147	0.0872
KALIMANTAN TIMUR	NUNUKAN	640400	0.0248	0.006	0.0308	0.0051	0.0059	0.011	0.0095	0.0251	0.0025	0.003	0.0401	0.0046	0.0865
NUSA TENGGARA TIMUR	BELU	530600	0.0126	0.012	0.0246	0.0083	0.0023	0.0106	0.0095	0.0251	0.0051	0.003	0.0427	0.0046	0.0825
BALI	GIANYAR	510400	0.0126	0.012	0.0246	0.0132	0.0037	0.0169	0.0054	0.007	0.0099	0.003	0.0253	0.0147	0.0815
RIAU	ROKAN HULU	140400	0.0248	0.003	0.0278	0.002	0.0059	0.0079	0.0095	0.0151	0.0025	0.003	0.0301	0.0147	0.0805
PAPUA	MANOKWARI	820700	0.0248	0.003	0.0278	0.0051	0.0059	0.011	0.0165	0.0151	0.0025	0.003	0.0371	0.0046	0.0805
SULAWESI SELATAN	PANGKAJENE & KEPULAUAN	730900	0.0126	0.003	0.0156	0.0132	0.0037	0.0169	0.0095	0.0151	0.0051	0.003	0.0327	0.0147	0.0799
J A M B I	BATANGHARI	150400	0.0248	0.006	0.0308	0.002	0.0037	0.0057	0.0054	0.0151	0.0051	0.003	0.0286	0.0147	0.0798
JAWA TIMUR	BLITAR	350500	0.0126	0.006	0.0186	0.0051	0.0009	0.006	0.0165	0.0251	0.0051	0.003	0.0497	0.0046	0.0789
JAMBI	TEBO	150200	0.0126	0.003	0.0156	0.002	0.0059	0.0079	0.0095	0.0251	0.0025	0.003	0.0401	0.0147	0.0783
SULAWESI UTARA	SANGIHE	710400	0.0126	0.012	0.0246	0.002	0.0009	0.0029	0.0165	0.0151	0.0099	0.003	0.0445	0.0046	0.0766
SUMATERA UTARA	LABUHAN BATU	120500	0.0062	0.006	0.0122	0.0083	0.0023	0.0106	0.0095	0.0251	0.0012	0.003	0.0388	0.0147	0.0763
SUMATERA SELATAN	MUSI BANYUASIN	160600	0.0126	0.003	0.0156	0.0132	0.0059	0.0191	0.0054	0.0151	0.0025	0.003	0.026	0.0147	0.0754
BANTEN	LEBAK	320200	0.0126	0.003	0.0156	0.002	0.0023	0.0043	0.0095	0.0251	0.0025	0.003	0.0401	0.0147	0.0747
BALI	BADUNG	510301	0.0062	0.012	0.0182	0.0132	0.0059	0.0191	0.0054	0.007	0.0051	0.003	0.0205	0.0147	0.0725
KALIMANTAN TIMUR	PASIR	640100	0.0126	0.0008	0.0134	0.0083	0.0059	0.0142	0.0095	0.007	0.0025	0.003	0.022	0.0217	0.0713
BALI	KARANG ASEM	510700	0.0062	0.012	0.0182	0.0132	0.0023	0.0155	0.0095	0.0151	0.0051	0.003	0.0327	0.0046	0.071
KALIMANTAN TENGAH	KAPUAS	620300	0.0126	0.012	0.0246	0.0051	0.0037	0.0088	0.0095	0.0151	0.0051	0.003	0.0327	0.0046	0.0707
SUMATERA BARAT	PASAMAN	130800	0.0126	0.003	0.0156	0.0031	0.0023	0.0054	0.0095	0.0151	0.0051	0.0043	0.034	0.0147	0.0697
LAMPUNG	WAY KANAN	180300	0.0062	0.012	0.0182	0.0051	0.0059	0.011	0.0054	0.007	0.0099	0.003	0.0253	0.0147	0.0692
LAMPUNG	LAMPUNG BARAT	180302	0.0062	0.003	0.0092	0.0083	0.0037	0.012	0.0095	0.0151	0.0051	0.003	0.0327	0.0147	0.0686
SUMATERA UTARA	DAIRI	120800	0.0062	0.012	0.0182	0.0031	0.0023	0.0054	0.0095	0.0151	0.0025	0.003	0.0301	0.0147	0.0684
SULAWESI SELATAN	BARRU	731000	0.0126	0.003	0.0156	0.0051	0.0037	0.0088	0.0054	0.007	0.0051	0.003	0.0205	0.0217	0.0666
R I A U	KAMPAR	140400	0.0062	0.003	0.0092	0.0051	0.0059	0.011	0.0095	0.0151	0.0025	0.0043	0.0314	0.0147	0.0663
J A M B I	BUNGO	150200	0.0126	0.012	0.0246	0.002	0.0023	0.0043	0.0095	0.0151	0.0051	0.003	0.0327	0.0046	0.0662
JAWA BARAT	INDRAMAYU	321400	0.0126	0.012	0.0246	0.0083	0.0023	0.0106	0.0054	0.0151	0.0025	0.003	0.026	0.0046	0.0658
SUMATERA SELATAN	MUSI RAWAS	160500	0.0126	0.0008	0.0134	0.0031	0.0059	0.009	0.0095	0.007	0.0012	0.003	0.0207	0.0217	0.0648
BALI	BULELENG	510800	0.0062	0.003	0.0092	0.0083	0.0009	0.0092	0.0095	0.0151	0.0025	0.0043	0.0314	0.0147	0.0645
SULAWESI SELATAN	BANTAENG	730300	0.0126	0.003	0.0156	0.0031	0.0037	0.0068	0.0095	0.007	0.0051	0.003	0.0246	0.0147	0.0617
JAWA TENGAH	BOYOLALI	330900	0.0062	0.012	0.0182	0.002	0.0009	0.0029	0.0054	0.007	0.0099	0.003	0.0253	0.0147	0.0611
SUMATERA BARAT	SOLOK	130200	0.0062	0.003	0.0092	0.0051	0.0023	0.0074	0.0054	0.007	0.0051	0.0043	0.0218	0.0217	0.0601
SULAWESI SELATAN	GOWA	730600	0.0062	0.003	0.0092	0.0083	0.0023	0.0106	0.0054	0.007	0.0025	0.003	0.0179	0.0217	0.0594
SUMATERA SELATAN	LAHAT	160400	0.0062	0.003	0.0092	0.0051	0.0014	0.0065	0.0095	0.007	0.0025	0.003	0.022	0.0217	0.0594
SULAWESI UTARA	MINAHASA	710300	0.0062	0.0015	0.0077	0.0051	0.0009	0.006	0.0095	0.0151	0.0025	0.003	0.0301	0.0147	0.0585
NUSA TENGGARA TIMUR	MANGGARAI	531200	0.0126	0.0015	0.0141	0.0051	0.0023	0.0074	0.0054	0.007	0.0025	0.0072	0.0221	0.0147	0.0583
BANGKA BELITUNG	BANGKA	160700	0.0016	0.012	0.0136	0.0083	0.0037	0.012	0.0054	0.007	0.0025	0.003	0.0179	0.0147	0.0582
SULAWESI SELATAN	MAROS	730800	0.0126	0.0015	0.0141	0.0083	0.0023	0.0106	0.0054	0.007	0.0025	0.003	0.0179	0.0147	0.0573
SULAWESI SELATAN	SELAYAR	730100	0.0126	0.003	0.0156	0.0051	0.0037	0.0088	0.0024	0.007	0.0051	0.003	0.0175	0.0147	0.0566
SULAWESI SELATAN	PINRANG	731500	0.0062	0.006	0.0122	0.0051	0.0023	0.0074	0.0095	0.007	0.0025	0.003	0.022	0.0147	0.0563
J A M B I	KERINCI	150100	0.0062	0.003	0.0092	0.0051	0.0023	0.0074	0.0054	0.007	0.0025	0.003	0.0179	0.0217	0.0562
JAWA TIMUR	SIDOARJO	351500	0.0126	0.003	0.0156	0.0051	0.0023	0.0074	0.0024	0.0034	0.0025	0.003	0.0113	0.0217	0.056
SULAWESI SELATAN	LUWU	731700	0.0062	0.0008	0.007	0.002	0.0023	0.0043	0.0095	0.007	0.0012	0.0043	0.022	0.0217	0.055
SULAWESI SELATAN	LUWU UTARA	731700	0.0062	0.0008	0.007	0.0132	0.0023	0.0155	0.0095	0.007	0.0025	0.0072	0.0262	0.0046	0.0533
BENGKULU	BENGKULU SELATAN	170100	0.0062	0.003	0.0092	0.0051	0.0009	0.006	0.0054	0.0151	0.0099	0.003	0.0334	0.0046	0.0532
JAWA BARAT	CIAMIS	320900	0.0062	0.003	0.0092	0.002	0.0009	0.0029	0.0054	0.0151	0.0025	0.003	0.026	0.0147	0.0528
KALIMANTAN TIMUR	KUTAI KERTANEGARA	640200	0.0126	0.003	0.0156	0.0083	0.0059	0.0142	0.0054	0.007	0.0025	0.003	0.0179	0.0046	0.0523
PAPUA	SORONG	820600	0.0062	0.003	0.0092	0.002	0.0023	0.0043	0.0054	0.0151	0.0006	0.003	0.0241	0.0147	0.0523
KALIMANTAN BARAT	SAMBAS	610100	0.0062	0.006	0.0122	0.0051	0.0023	0.0074	0.0054	0.007	0.0025	0.003	0.0179	0.0147	0.0522
SUMATERA SELATAN	MUARA ENIM	160300	0.0062	0.0015	0.0077	0.0132	0.0023	0.0155	0.0024	0.007	0.0012	0.003	0.0136	0.0147	0.0515
SUMATERA UTARA	ASAHAN	120600	0.0016	0.0008	0.0024	0.0132	0.0023	0.0155	0.0012	0.007	0.0006	0.003	0.0118	0.0217	0.0514
JAWA BARAT	CIREBON	321100	0.0126	0.003	0.0156	0.0083	0.0023	0.0106	0.0054	0.007	0.0051	0.003	0.0205	0.0046	0.0513
R I A U	BENGKALIS	140500	0.0016	0.003	0.0046	0.0132	0.0059	0.0191	0.0054	0.0018	0.0025	0.003	0.0127	0.0147	0.0511
JAWA BARAT	GARUT	320700	0.0062	0.003	0.0092	0.0051	0.0009	0.006	0.0054	0.007	0.0051	0.003	0.0205	0.0147	0.0504
NUSA TENGGARA BARAT	LOMBOK TIMUR	520300	0.0062	0.003	0.0092	0.002	0.0023	0.0043	0.0054	0.007	0.0025	0.0072	0.0221	0.0147	0.0503
NUSA TENGGARA BARAT	DOMPU	520500	0.0062	0.0015	0.0077	0.0051	0.0023	0.0074	0.0054	0.007	0.0051	0.003	0.0205	0.0147	0.0503
SULAWESI TENGGARA	KOLAKA	740400	0.0062	0.003	0.0092	0.0083	0.0023	0.0106	0.0054	0.007	0.0099	0.003	0.0253	0.0046	0.0497
NUSA TENGGARA TIMUR	SUMBA BARAT	530100	0.0126	0.003	0.0156	0.0031	0.0023	0.0054	0.0165	0.0034	0.0012	0.003	0.0241	0.0046	0.0497
SULAWESI TENGAH	DONGGALA	720300	0.0062	0.006	0.0122	0.0083	0.0009	0.0092	0.0024	0.007	0.0006	0.003	0.013	0.0147	0.0491
KALIMANTAN TIMUR	KUTAI TIMUR	640200	0.0062	0.006	0.0122	0.0083	0.0059	0.0142	0.0054	0.007	0.0025	0.003	0.0179	0.0046	0.0489
NUSA TENGGARA BARAT	BIMA	520600	0.0062	0.003	0.0092	0.0083	0.0014	0.0097	0.0024	0.007	0.0025	0.003	0.0149	0.0147	0.0485
BANTEN	SERANG	322000	0.0062	0.003	0.0092	0.0051	0.0014	0.0065	0.0054	0.007	0.0025	0.003	0.0179	0.0147	0.0483
JAWA TIMUR	LAMONGAN	352400	0.0062	0.003	0.0092	0.0051	0.0014	0.0065	0.0054	0.007	0.0025	0.003	0.0179	0.0147	0.0483
JAWA TENGAH	KLATEN	331000	0.0031	0.0008	0.0039	0.0083	0.0009	0.0092	0.0054	0.007	0.0006	0.0072	0.0202	0.0147	0.048
JAWA TENGAH	KARANG ANYAR	331300	0.0062	0.003	0.0092	0.0051	0.0009	0.006	0.0054	0.007	0.0025	0.003	0.0179	0.0147	0.0478
JAWA TENGAH	TEGAL	332800	0.0062	0.003	0.0092	0.0031	0.0023	0.0054	0.0054	0.007	0.0025	0.003	0.0179	0.0147	0.0472
JAWA TENGAH	KEBUMEN	330500	0.0062	0.003	0.0092	0.0051	0.0014	0.0065	0.0054	0.007	0.0012	0.003	0.0166	0.0147	0.047
JAWA TIMUR	JOMBANG	351700	0.0031	0.003	0.0061	0.0051	0.0023	0.0074	0.0054	0.0151	0.0051	0.003	0.0286	0.0046	0.0467
SUMATERA BARAT	PESISIR SELATAN	130100	0.0126	0.0015	0.0141	0.002	0.0014	0.0034	0.0095	0.007	0.0051	0.003	0.0246	0.0046	0.0467
SULAWESI TENGGARA	BUTON	740100	0.0062	0.0015	0.0077	0.002	0.0023	0.0043	0.0024	0.007	0.0006	0.003	0.013	0.0217	0.0467
BANTEN	TANGERANG	321901	0.0016	0.003	0.0046	0.0083	0.0023	0.0106	0.0024	0.0018	0.0025	0.003	0.0097	0.0217	0.0466
KALIMANTAN TENGAH	BARITO SELATAN	620400	0.0062	0.0015	0.0077	0.0051	0.0059	0.011	0.0024	0.007	0.0006	0.003	0.013	0.0147	0.0464
DI. YOGYAKARTA	GUNUNG KIDUL	340300	0.0031	0.003	0.0061	0.002	0.0014	0.0034	0.0095	0.007	0.0025	0.003	0.022	0.0147	0.0462
JAWA BARAT	BANDUNG	320600	0.0031	0.0015	0.0046	0.0083	0.0023	0.0106	0.0054	0.007	0.0006	0.003	0.016	0.0147	0.0459
JAWA TIMUR	KEDIRI	350600	0.0016	0.012	0.0136	0.0051	0.0014	0.0065	0.0012	0.0018	0.0051	0.003	0.0111	0.0147	0.0459
JAWA TENGAH	CILACAP	330100	0.0062	0.003	0.0092	0.0083	0.0014	0.0097	0.0054	0.0018	0.0012	0.003	0.0114	0.0147	0.045
JAWA TIMUR	BANGKALAN	352600	0.0062	0.0008	0.007	0.0051	0.0014	0.0065	0.0054	0.007	0.0012	0.003	0.0166	0.0147	0.0448
R I A U	INDRAGIRI HILIR	140200	0.0062	0.0008	0.007	0.002	0.0059	0.0079	0.0012	0.0034	0.0006	0.003	0.0082	0.0217	0.0448
SUMATERA UTARA	LANGKAT	121100	0.0016	0.0008	0.0024	0.0132	0.0023	0.0155	0.0012	0.007	0.0006	0.003	0.0118	0.0147	0.0444
KALIMANTAN TIMUR	BERAU	640300	0.0062	0.0015	0.0077	0.0083	0.0059	0.0142	0.0024	0.0018	0.0006	0.003	0.0078	0.0147	0.0444
PAPUA	JAYAWIJAYA	820200	0.0062	0.0015	0.0077	0.0051	0.0037	0.0088	0.0024	0.007	0.0006	0.003	0.013	0.0147	0.0442
RIAU	KUANTAN SENGGIGI	140100	0.0062	0.0015	0.0077	0.002	0.0059	0.0079	0.0012	0.007	0.0012	0.0043	0.0137	0.0147	0.044
JAWA BARAT	BEKASI	321801	0.0062	0.003	0.0092	0.0083	0.0037	0.012	0.0054	0.007	0.0025	0.003	0.0179	0.0046	0.0437
KALIMANTAN SELATAN	HULU SUNGAI TENGAH	630700	0.0062	0.0015	0.0077	0.0051	0.0023	0.0074	0.0024	0.007	0.0006	0.003	0.013	0.0147	0.0428
PAPUA	MIMIKA	820500	0.0062	0.0015	0.0077	0.0132	0.0037	0.0169	0.0024	0.007	0.0006	0.003	0.013	0.0046	0.0422
JAWA TIMUR	PASURUAN	351400	0.0016	0.0015	0.0031	0.0132	0.0023	0.0155	0.0012	0.0018	0.0025	0.003	0.0085	0.0147	0.0418
LAMPUNG	LAMPUNG UTARA	180300	0.0062	0.006	0.0122	0.0051	0.0023	0.0074	0.0024	0.007	0.0051	0.003	0.0175	0.0046	0.0417
JAWA TENGAH	PEMALANG	332700	0.0031	0.003	0.0061	0.0051	0.0009	0.006	0.0054	0.0034	0.0025	0.003	0.0143	0.0147	0.0411
SUMATERA UTARA	TAPANULI UTARA	120400	0.0016	0.0015	0.0031	0.002	0.0023	0.0043	0.0024	0.0034	0.0099	0.003	0.0187	0.0147	0.0408
SULAWESI TENGAH	POSO	720200	0.0062	0.0015	0.0077	0.0031	0.0023	0.0054	0.0024	0.007	0.0006	0.003	0.013	0.0147	0.0408
JAWA TENGAH	KUDUS	331900	0.0062	0.0015	0.0077	0.0031	0.0023	0.0054	0.0054	0.0034	0.0006	0.003	0.0124	0.0147	0.0402
JAWA TIMUR	GRESIK	352500	0.0031	0.0015	0.0046	0.0132	0.0014	0.0146	0.0054	0.007	0.0006	0.003	0.016	0.0046	0.0398
KALIMANTAN SELATAN	HULU SUNGAI SELATAN	630600	0.0062	0.0015	0.0077	0.002	0.0023	0.0043	0.0024	0.007	0.0006	0.003	0.013	0.0147	0.0397
SULAWESI TENGAH	MOROWALI	720200	0.0016	0.0015	0.0031	0.0031	0.0037	0.0068	0.0024	0.007	0.0025	0.003	0.0149	0.0147	0.0395
NUSA TENGGARA TIMUR	NGADA	531100	0.0062	0.003	0.0092	0.002	0.0023	0.0043	0.0024	0.0034	0.0025	0.003	0.0113	0.0147	0.0395
SUMATERA UTARA	SIMALUNGUN	120700	0.0016	0.0008	0.0024	0.0083	0.0023	0.0106	0.0012	0.007	0.0006	0.003	0.0118	0.0147	0.0395
JAWA TIMUR	BANYUWANGI	351000	0.0031	0.0015	0.0046	0.0051	0.0014	0.0065	0.0024	0.0018	0.0012	0.0072	0.0126	0.0147	0.0384
JAWA TENGAH	KENDAL	332400	0.0062	0.0008	0.007	0.0051	0.0009	0.006	0.0054	0.007	0.0006	0.0072	0.0202	0.0046	0.0378
JAWA BARAT	SUMEDANG	321300	0.0062	0.003	0.0092	0.0051	0.0009	0.006	0.0054	0.007	0.0025	0.003	0.0179	0.0046	0.0377
JAWA TENGAH	JEPARA	332000	0.0062	0.0015	0.0077	0.0031	0.0023	0.0054	0.0024	0.0034	0.0006	0.003	0.0094	0.0147	0.0372
SUMATERA SELATAN	OGAN KOMERING ILIR	160200	0.0062	0.0015	0.0077	0.0051	0.0037	0.0088	0.0054	0.007	0.0006	0.003	0.016	0.0046	0.0371
JAWA TENGAH	BANYUMAS	330200	0.0031	0.0015	0.0046	0.0031	0.0009	0.004	0.0024	0.007	0.0012	0.003	0.0136	0.0147	0.0369
SULAWESI SELATAN	BONE	731100	0.0031	0.006	0.0091	0.002	0.0009	0.0029	0.0012	0.0018	0.0025	0.0043	0.0098	0.0147	0.0365
KALIMANTAN SELATAN	TANAH LAUT	630100	0.0016	0.0008	0.0024	0.0051	0.0023	0.0074	0.0024	0.0018	0.0006	0.0072	0.012	0.0147	0.0365
SULAWESI SELATAN	MAJENE	732000	0.0126	0.0008	0.0134	0.0051	0.0009	0.006	0.0054	0.0034	0.0006	0.003	0.0124	0.0046	0.0364
KALIMANTAN BARAT	KETAPANG	610400	0.0062	0.0015	0.0077	0.0051	0.0059	0.011	0.0024	0.007	0.0006	0.003	0.013	0.0046	0.0363
JAWA BARAT	BOGOR	320300	0.0031	0.003	0.0061	0.0083	0.0023	0.0106	0.0024	0.007	0.0025	0.003	0.0149	0.0046	0.0362
JAWA BARAT	SUKABUMI	320400	0.0062	0.0015	0.0077	0.0083	0.0023	0.0106	0.0024	0.007	0.0006	0.003	0.013	0.0046	0.0359
PAPUA	FAKFAK	820500	0.0062	0.0015	0.0077	0.0083	0.0023	0.0106	0.0024	0.007	0.0006	0.003	0.013	0.0046	0.0359
JAWA TENGAH	MAGELANG	330800	0.0062	0.003	0.0092	0.0083	0.0023	0.0106	0.0024	0.0034	0.0025	0.003	0.0113	0.0046	0.0357
DIYOGYAKARTA	BANTUL	340200	0.0031	0.0015	0.0046	0.0031	0.0009	0.004	0.0054	0.0034	0.0006	0.003	0.0124	0.0147	0.0357
JAWA BARAT	KARAWANG	321700	0.0062	0.003	0.0092	0.0051	0.0023	0.0074	0.0024	0.007	0.0006	0.0043	0.0143	0.0046	0.0355
SULAWESI SELATAN	TAKALAR	730500	0.0031	0.0015	0.0046	0.0031	0.0014	0.0045	0.0024	0.0034	0.0025	0.003	0.0113	0.0147	0.0351
KALIMANTAN SELATAN	TAPIN	630500	0.0062	0.0015	0.0077	0.0083	0.0014	0.0097	0.0024	0.007	0.0006	0.003	0.013	0.0046	0.035
JAWA TENGAH	PEKALONGAN	332600	0.0016	0.0015	0.0031	0.0051	0.0014	0.0065	0.0024	0.0034	0.0012	0.003	0.01	0.0147	0.0343
NUSA TENGGARA BARAT	LOMBOK BARAT	520101	0.0031	0.003	0.0061	0.0132	0.0014	0.0146	0.0012	0.0018	0.0025	0.003	0.0085	0.0046	0.0338
KALIMANTAN BARAT	PONTIANAK	610200	0.0031	0.0015	0.0046	0.0132	0.0014	0.0146	0.0012	0.0034	0.0006	0.0043	0.0095	0.0046	0.0333
SUMATERA UTARA	TANAH KARO	120900	0.0062	0.003	0.0092	0.0051	0.0014	0.0065	0.0054	0.0034	0.0012	0.003	0.013	0.0046	0.0333
JAWA TIMUR	PAMEKASAN	352800	0.0031	0.0008	0.0039	0.0031	0.0014	0.0045	0.0012	0.0034	0.0025	0.003	0.0101	0.0147	0.0332
JAWA TIMUR	BONDOWOSO	351100	0.0016	0.0008	0.0024	0.0051	0.0009	0.006	0.0024	0.0018	0.0025	0.003	0.0097	0.0147	0.0328
KALIMANTAN BARAT	SANGGAU	610300	0.0062	0.0015	0.0077	0.0051	0.0023	0.0074	0.0024	0.007	0.0006	0.003	0.013	0.0046	0.0327
JAWA BARAT	SUBANG	321500	0.0062	0.003	0.0092	0.0031	0.0014	0.0045	0.0054	0.0034	0.0012	0.003	0.013	0.0046	0.0313
KALIMANTAN BARAT	KAPUAS HULU	610600	0.0062	0.0015	0.0077	0.002	0.0037	0.0057	0.0024	0.007	0.0006	0.003	0.013	0.0046	0.031
GORONTALO	GORONTALO	710100	0.0062	0.0015	0.0077	0.002	0.0014	0.0034	0.0024	0.007	0.0006	0.003	0.013	0.0046	0.0287
JAWA TIMUR	JEMBER	350900	0.0031	0.0008	0.0039	0.0031	0.0023	0.0054	0.0054	0.0034	0.0012	0.0043	0.0143	0.0046	0.0282
JAWA TIMUR	MOJOKERTO	351600	0.0016	0.0015	0.0031	0.0083	0.0014	0.0097	0.0012	0.0034	0.0025	0.003	0.0101	0.0046	0.0275
JAWA TENGAH	SUKOHARJO	331100	0.0016	0.0015	0.0031	0.0083	0.0009	0.0092	0.0012	0.0018	0.0012	0.003	0.0072	0.0046	0.0241
SUMATERA UTARA	DELI SERDANG	121000	0.0016	0.0008	0.0024	0.0083	0.0014	0.0097	0.0012	0.0018	0.0006	0.003	0.0066	0.0046	0.0233
NUSA TENGGARA TIMUR	FLORES TIMUR	530800	0.0016	0.0008	0.0024	0.0051	0.0023	0.0074	0.0024	0.0018	0.0012	0.003	0.0084	0.0046	0.0228
LAMPUNG	LAMPUNG SELATAN	180101	0.0016	0.0015	0.0031	0.0051	0.0014	0.0065	0.0012	0.0018	0.0025	0.003	0.0085	0.0046	0.0227
LAMPUNG	LAMPUNG TIMUR	180200	0.0016	0.0008	0.0024	0.0051	0.0009	0.006	0.0012	0.0018	0.0025	0.003	0.0085	0.0046	0.0215
JAWA TIMUR	TULUNGAGUNG	350400	0.0016	0.0015	0.0031	0.0051	0.0014	0.0065	0.0012	0.0018	0.0006	0.003	0.0066	0.0046	0.0208
JAWA TIMUR	PONOROGO	350200	0.0016	0.0008	0.0024	0.0051	0.0014	0.0065	0.0012	0.0018	0.0012	0.003	0.0072	0.0046	0.0207
JAWA TIMUR	KOTA MOJOKERTO	357600	0.0126	0.012	0.0246	0.0051	0.0023	0.0074	0.0054	0.0151	0.0099	0.003	0.0334	0.0147	0.0801
JAWA TENGAH	KOTA TEGAL	337600	0.0126	0.003	0.0156	0.002	0.0037	0.0057	0.0095	0.0151	0.0025	0.003	0.0301	0.0217	0.0731
JAWA BARAT	KOTA BANDUNG	327300	0.0062	0.003	0.0092	0.0083	0.0023	0.0106	0.0095	0.0151	0.0012	0.003	0.0288	0.0217	0.0703
SUMATERA UTARA	KOTA TEBING TINGGI	127400	0.0126	0.012	0.0246	0.0083	0.0023	0.0106	0.0095	0.0151	0.0025	0.003	0.0301	0.0046	0.0699
BANTEN	KOTA CILEGON	322000	0.0126	0.003	0.0156	0.0132	0.0023	0.0155	0.0054	0.007	0.0025	0.003	0.0179	0.0147	0.0637
SUMATERA UTARA	KOTA PEMATANG SIANTAR	127300	0.0126	0.0061	0.0187	0.0051	0.0023	0.0074	0.0095	0.007	0.0025	0.0015	0.0205	0.0147	0.0613
R I A U	KOTA DUMAI	140500	0.0031	0.003	0.0061	0.0083	0.0059	0.0142	0.0054	0.007	0.0025	0.003	0.0179	0.0217	0.0599
SUMATERA BARAT	KOTA SAWAH LUNTO	130302	0.0062	0.0061	0.0123	0.0031	0.0023	0.0054	0.0054	0.007	0.0099	0.0043	0.0266	0.0147	0.059
R I A U	KOTA BATAM	147200	0.0062	0.0061	0.0123	0.0083	0.0059	0.0142	0.0054	0.0151	0.0025	0.003	0.026	0.0046	0.0571
JAWA TENGAH	KOTA SEMARANG	337400	0.0062	0.0008	0.007	0.0083	0.0059	0.0142	0.0054	0.0034	0.0012	0.003	0.013	0.0217	0.0559
GORONTALO	KOTA GORONTALO	717100	0.0062	0.003	0.0092	0.002	0.0023	0.0043	0.0054	0.007	0.0051	0.003	0.0205	0.0217	0.0557
SUMATERA UTARA	KOTA MEDAN	127500	0.0062	0.003	0.0092	0.0083	0.0014	0.0097	0.0095	0.007	0.0025	0.003	0.022	0.0147	0.0556
DKI JAKARTA	DKI JAKARTA	0	0.0062	0.0015	0.0077	0.0132	0.0037	0.0169	0.0054	0.007	0.0006	0.003	0.016	0.0147	0.0553
NUSA TENGGARA TIMUR	KOTA KUPANG	530302	0.0062	0.0061	0.0123	0.0083	0.0009	0.0092	0.0054	0.007	0.0025	0.003	0.0179	0.0147	0.0541
JAWA BARAT	KOTA CIREBON	327400	0.0126	0.003	0.0156	0.0051	0.0023	0.0074	0.0054	0.0151	0.0025	0.003	0.026	0.0046	0.0536
D.I. YOGYAKARTA	KOTA YOGYAKARTA	347100	0.0062	0.003	0.0092	0.0083	0.0009	0.0092	0.0054	0.0034	0.0012	0.003	0.013	0.0217	0.0531
SULAWESI SELATAN	KOTA PARE-PARE	737200	0.0126	0.0008	0.0134	0.002	0.0023	0.0043	0.0054	0.007	0.0025	0.003	0.0179	0.0147	0.0503
JAWA TIMUR	KOTA MALANG	357300	0.0031	0.0015	0.0046	0.0083	0.0014	0.0097	0.0054	0.0018	0.0025	0.0043	0.014	0.0217	0.05
SUMATERA BARAT	KOTA PADANG	137100	0.0031	0.0008	0.0039	0.0132	0.0009	0.0141	0.0054	0.0018	0.0025	0.0072	0.0169	0.0147	0.0496
BALI	KOTA DENPASAR	510302	0.0031	0.003	0.0061	0.0083	0.0023	0.0106	0.0054	0.007	0.0025	0.003	0.0179	0.0147	0.0493
R I A U	KOTA PEKAN BARU	147100	0.0062	0.0015	0.0077	0.0083	0.0023	0.0106	0.0054	0.007	0.0006	0.003	0.016	0.0147	0.049
JAWA TIMUR	KOTA KEDIRI	357100	0.0062	0.003	0.0092	0.0083	0.0014	0.0097	0.0095	0.0034	0.0051	0.0072	0.0252	0.0046	0.0487
SULAWESI UTARA	KOTA MANADO	717200	0.0031	0.0008	0.0039	0.0083	0.0014	0.0097	0.0054	0.007	0.0006	0.0072	0.0202	0.0147	0.0485
JAWA BARAT	KOTA BOGOR	327100	0.0062	0.012	0.0182	0.0083	0.0023	0.0106	0.0024	0.007	0.0025	0.003	0.0149	0.0046	0.0483
BENGKULU	KOTA BENGKULU	177100	0.0062	0.003	0.0092	0.0051	0.0014	0.0065	0.0024	0.007	0.0025	0.0043	0.0162	0.0147	0.0466
LAMPUNG	KOTA BANDAR LAMPUNG	187100	0.0031	0.0008	0.0039	0.0083	0.0009	0.0092	0.0024	0.007	0.0006	0.0072	0.0172	0.0147	0.045
BANTEN	KOTA TANGERANG	321902	0.0031	0.0008	0.0039	0.0132	0.0037	0.0169	0.0024	0.0018	0.0006	0.003	0.0078	0.0147	0.0433
SUMATERA UTARA	KOTA SIBOLGA	127100	0.0016	0.003	0.0046	0.002	0.0037	0.0057	0.0012	0.0018	0.0099	0.003	0.0159	0.0147	0.0409
JAWA TIMUR	KOTA PROBOLINGGO	357400	0.0126	0.0015	0.0141	0.0031	0.0023	0.0054	0.0054	0.007	0.0012	0.003	0.0166	0.0046	0.0407
JAWA TENGAH	KOTA PEKALONGAN	337500	0.0031	0.0015	0.0046	0.0083	0.0037	0.012	0.0024	0.0034	0.0006	0.003	0.0094	0.0147	0.0407
KALIMANTAN TIMUR	KOTA BALIKPAPAN	647100	0.0062	0.0015	0.0077	0.0083	0.0059	0.0142	0.0024	0.007	0.0012	0.003	0.0136	0.0046	0.0401
JAWA TENGAH	KOTA SURAKARTA	337200	0.0031	0.0015	0.0046	0.0083	0.0009	0.0092	0.0024	0.0034	0.0025	0.003	0.0113	0.0147	0.0398
JAWA BARAT	KOTA SUKABUMI	327200	0.0062	0.0015	0.0077	0.002	0.0023	0.0043	0.0024	0.007	0.0006	0.003	0.013	0.0147	0.0397
JAWA TIMUR	KOTA SURABAYA	357800	0.0062	0.0008	0.007	0.0083	0.0014	0.0097	0.0054	0.007	0.0012	0.0043	0.0179	0.0046	0.0392
SUMATERA SELATAN	KOTA PALEMBANG	167100	0.0016	0.0008	0.0024	0.0083	0.0014	0.0097	0.0012	0.0018	0.0006	0.0072	0.0108	0.0147	0.0376
SULAWESI TENGGARA	KOTA KENDARI	740302	0.0062	0.0015	0.0077	0.0083	0.0014	0.0097	0.0054	0.0034	0.0012	0.0043	0.0143	0.0046	0.0363
SUMATERA UTARA	KOTA TANJUNG BALAI	127200	0.0062	0.0015	0.0077	0.0051	0.0059	0.011	0.0024	0.007	0.0006	0.003	0.013	0.0046	0.0363
JAWA TIMUR	KOTA MADIUN	357700	0.0031	0.003	0.0061	0.0083	0.0059	0.0142	0.0024	0.0034	0.0025	0.003	0.0113	0.0046	0.0362
SUMATERA UTARA	KOTA BINJAI	127600	0.0016	0.0015	0.0031	0.0051	0.0023	0.0074	0.0012	0.0034	0.0025	0.003	0.0101	0.0147	0.0353
KALIMANTAN TIMUR	KOTA SAMARINDA	647200	0.0016	0.0008	0.0024	0.0051	0.0059	0.011	0.0012	0.0018	0.0006	0.003	0.0066	0.0147	0.0347
SULAWESI UTARA	KOTA BITUNG	710302	0.0062	0.0015	0.0077	0.0051	0.0023	0.0074	0.0024	0.007	0.0006	0.003	0.013	0.0046	0.0327
JAWA BARAT	KOTA BEKASI	321802	0.0016	0.0008	0.0024	0.0051	0.0037	0.0088	0.0012	0.0018	0.0006	0.003	0.0066	0.0147	0.0325
BANGKA BELITUNG	KOTA PANGKAL PINANG	167200	0.0062	0.003	0.0092	0.0031	0.0023	0.0054	0.0012	0.0034	0.0025	0.003	0.0101	0.0046	0.0293
NUSA TENGGARA BARAT	KOTA MATARAM	520102	0.0031	0.003	0.0061	0.0083	0.0023	0.0106	0.0012	0.0018	0.0006	0.003	0.0066	0.0046	0.0279

## Sheet: socpol_03
prov_kppod_03	kab_kppod_03	kabID97	bus_sec_03	comm_sec_03	quickreply_03	subtot_sec_03	part_comm_03	soc_conflict_03	pol_stab_03	demo_intens_03	subtot_socpol_03	open_comm_bus_03	nodiscr_03	soc_customs_03	comm_workethos_03	subtot_soccul_03	tot_socpol_03
JAWA TIMUR	MAGETAN	352000	0.0254	0.0163	0.0335	0.0752	0.0037	0.0095	0.0094	0.0005	0.0231	0.0041	0.0031	0.0032	0.0067	0.0171	0.1154
JAWA BARAT	PURWAKARTA	321600	0.0254	0.0163	0.0335	0.0752	0.0037	0.0095	0.0094	0.0005	0.0231	0.0025	0.0031	0.0032	0.0067	0.0155	0.1138
NUSA TENGGARA TIMUR	BELU	530600	0.0254	0.0163	0.0335	0.0752	0.0023	0.0095	0.0116	0.0049	0.0283	0.0012	0.0002	0.0012	0.0009	0.0035	0.107
SULAWESI SELATAN	BANTAENG	730300	0.0254	0.0163	0.0335	0.0752	0.0023	0.0024	0.0116	0.0012	0.0175	0.0041	0.0031	0.0003	0.0067	0.0142	0.1069
JAWA BARAT	KUNINGAN	321000	0.0254	0.0163	0.0335	0.0752	0.0023	0.0024	0.0048	0.0049	0.0144	0.0012	0.0031	0.002	0.0067	0.013	0.1026
NUSA TENGGARA TIMUR	ENDE	531000	0.0254	0.0163	0.0214	0.0631	0.0037	0.0095	0.0094	0.0012	0.0238	0.0025	0.0031	0.0032	0.0067	0.0155	0.1024
JAWA BARAT	TASIKMALAYA	320800	0.0254	0.0163	0.0335	0.0752	0.0037	0.0024	0.0048	0.0005	0.0114	0.0041	0.0031	0.0012	0.0067	0.0151	0.1017
SULAWESI UTARA	SANGIHE	710400	0.0254	0.0163	0.0335	0.0752	0.0023	0.0024	0.0094	0.0049	0.019	0.0012	0.0018	0.0003	0.0019	0.0052	0.0994
PAPUA	MANOKWARI	820700	0.0254	0.0163	0.0335	0.0752	0.0037	0.0024	0.0094	0.0005	0.016	0.0025	0.0002	0.0032	0.0005	0.0064	0.0976
JAWA TENGAH	TEGAL	332800	0.0153	0.0163	0.0335	0.0651	0.0023	0.0095	0.0048	0.0049	0.0215	0.0025	0.0018	0.0012	0.004	0.0095	0.0961
SULAWESI SELATAN	ENREKANG	731600	0.0254	0.0163	0.0214	0.0631	0.0023	0.0095	0.0094	0.0025	0.0237	0.0012	0.0018	0.002	0.004	0.009	0.0958
BALI	JEMBRANA	510100	0.0254	0.0163	0.0214	0.0631	0.0023	0.0007	0.0116	0.0003	0.0149	0.0041	0.0031	0.0032	0.004	0.0144	0.0924
SULAWESI SELATAN	JENEPONTO	730400	0.0153	0.008	0.0335	0.0568	0.0037	0.0095	0.0048	0.0012	0.0192	0.0025	0.0031	0.0032	0.0067	0.0155	0.0915
KALIMANTAN TIMUR	NUNUKAN	640400	0.0153	0.008	0.0335	0.0568	0.003	0.0048	0.0094	0.0005	0.0177	0.0041	0.0031	0.002	0.0067	0.0159	0.0904
SULAWESI SELATAN	SINJAI	730700	0.0153	0.0163	0.0335	0.0651	0.0023	0.0011	0.0048	0.0025	0.0107	0.0025	0.0031	0.002	0.0067	0.0143	0.0901
SULAWESI SELATAN	GOWA	730600	0.0254	0.0163	0.0214	0.0631	0.0023	0.0011	0.0094	0.0012	0.014	0.0012	0.0031	0.0005	0.0067	0.0115	0.0886
SULAWESI UTARA	MINAHASA	710300	0.0153	0.0036	0.0335	0.0524	0.003	0.0048	0.0116	0.0012	0.0206	0.0025	0.0031	0.0032	0.0067	0.0155	0.0885
KALIMANTAN TENGAH	KAPUAS	620300	0.0254	0.0036	0.0335	0.0625	0.0037	0.0024	0.0116	0.0005	0.0182	0.0012	0.0004	0.0032	0.0019	0.0067	0.0874
KALIMANTAN TIMUR	BULUNGAN	640400	0.0254	0.0163	0.0214	0.0631	0.0023	0.0024	0.0116	0.0012	0.0175	0.0025	0.0009	0.0012	0.0019	0.0065	0.0871
SULAWESI TENGAH	BANGGAI	720100	0.0254	0.0163	0.0102	0.0519	0.0037	0.0095	0.0094	0.0005	0.0231	0.0003	0.0002	0.0032	0.0067	0.0104	0.0854
SULAWESI SELATAN	TANA TORAJA	731800	0.0062	0.0163	0.0335	0.056	0.0023	0.0048	0.0116	0.0049	0.0236	0.0012	0.0031	0.0005	0.0009	0.0057	0.0853
JAWA BARAT	SUBANG	321500	0.0254	0.0163	0.0214	0.0631	0.0023	0.0024	0.0094	0.0012	0.0153	0.0025	0.0018	0.0012	0.0005	0.006	0.0844
BALI	BANGLI	510600	0.0254	0.0163	0.0214	0.0631	0.0023	0.0011	0.002	0.0003	0.0057	0.0025	0.0031	0.0032	0.0067	0.0155	0.0843
SULAWESI SELATAN	LUWU UTARA	731700	0.0254	0.008	0.0102	0.0436	0.0023	0.0024	0.0116	0.0049	0.0212	0.0041	0.0031	0.0032	0.0067	0.0171	0.0819
SUMATERA BARAT	PESISIR SELATAN	130100	0.0153	0.0163	0.0335	0.0651	0.0023	0.0011	0.0048	0.0005	0.0087	0.0041	0.0009	0.0012	0.0019	0.0081	0.0819
SUMATERA UTARA	TAPANULI UTARA	120400	0.0254	0.0163	0.0214	0.0631	0.0023	0.0007	0.0048	0.0005	0.0083	0.0041	0.0031	0.0012	0.0019	0.0103	0.0817
R I A U	KAMPAR	140400	0.0153	0.0036	0.0335	0.0524	0.0023	0.0011	0.0094	0.0005	0.0133	0.0025	0.0031	0.0032	0.0067	0.0155	0.0812
NUSA TENGGARA TIMUR	TIMOR TENGAH SELATAN	530400	0.0062	0.008	0.0335	0.0477	0.0023	0.0095	0.0116	0.0049	0.0283	0.0012	0.0004	0.0012	0.0005	0.0033	0.0793
JAWA BARAT	CIAMIS	320900	0.0254	0.0163	0.0102	0.0519	0.0037	0.0024	0.0048	0.0049	0.0158	0.0041	0.0018	0.002	0.0009	0.0088	0.0765
JAWA BARAT	INDRAMAYU	321400	0.0062	0.0163	0.0335	0.056	0.0023	0.0024	0.0094	0.0012	0.0153	0.0012	0.0009	0.0012	0.0019	0.0052	0.0765
KALIMANTAN TENGAH	BARITO UTARA	620500	0.0254	0.0163	0.0102	0.0519	0.0037	0.0024	0.0094	0.0005	0.016	0.0003	0.0002	0.0003	0.0067	0.0075	0.0754
SUMATERA BARAT	SAWAHLUNTO SIJUNJUNG	130300	0.0254	0.008	0.0102	0.0436	0.0023	0.0095	0.002	0.0005	0.0143	0.0041	0.0031	0.0032	0.0067	0.0171	0.075
SULAWESI SELATAN	SELAYAR	730100	0.0153	0.0163	0.0102	0.0418	0.0023	0.0024	0.0116	0.0049	0.0212	0.0025	0.0031	0.0032	0.0019	0.0107	0.0737
SULAWESI SELATAN	MAJENE	732000	0.0254	0.008	0.0102	0.0436	0.0023	0.0011	0.0094	0.0005	0.0133	0.0041	0.0031	0.002	0.0067	0.0159	0.0728
SULAWESI TENGGARA	KOLAKA	740400	0.0254	0.0163	0.0102	0.0519	0.0037	0.0011	0.0048	0.0049	0.0145	0.0006	0.0004	0.0012	0.0019	0.0041	0.0705
J A M B I	BATANGHARI	150400	0.0062	0.0036	0.0335	0.0433	0.003	0.0048	0.0116	0.0025	0.0219	0.0012	0.0009	0.0012	0.0009	0.0042	0.0694
JAWA BARAT	CIANJUR	320500	0.002	0.008	0.0214	0.0314	0.0037	0.0095	0.0094	0.0012	0.0238	0.0012	0.0031	0.0032	0.0067	0.0142	0.0694
SUMATERA SELATAN	LAHAT	160400	0.0062	0.0021	0.0335	0.0418	0.0023	0.0011	0.0094	0.0025	0.0153	0.0041	0.0009	0.0032	0.004	0.0122	0.0693
LAMPUNG	LAMPUNG BARAT	180302	0.0254	0.0163	0.0048	0.0465	0.0023	0.0007	0.0094	0.0049	0.0173	0.0012	0.0009	0.0012	0.0019	0.0052	0.069
JAWA TIMUR	KEDIRI	350600	0.0034	0.0021	0.0214	0.0269	0.0023	0.0095	0.0094	0.0025	0.0237	0.0041	0.0031	0.0032	0.0067	0.0171	0.0677
JAWA BARAT	GARUT	320700	0.0062	0.008	0.0214	0.0356	0.0023	0.0024	0.0094	0.0049	0.019	0.0025	0.0031	0.0032	0.004	0.0128	0.0674
BANGKA BELITUNG	BELITUNG	160700	0.0254	0.0163	0.0102	0.0519	0.0023	0.0011	0.0048	0.0012	0.0094	0.0012	0.0009	0.0012	0.0019	0.0052	0.0665
PAPUA	SORONG	820600	0.0254	0.0036	0.0102	0.0392	0.003	0.0095	0.0094	0.0012	0.0231	0.0012	0.0004	0.0012	0.0009	0.0037	0.066
BALI	KARANG ASEM	510700	0.0153	0.008	0.0102	0.0335	0.0023	0.0024	0.0116	0.0012	0.0175	0.0041	0.0009	0.0012	0.0067	0.0129	0.0639
SULAWESI SELATAN	PANGKAJENE & KEPULAUAN	730900	0.0153	0.008	0.0214	0.0447	0.0037	0.0011	0.002	0.0003	0.0071	0.0012	0.0018	0.0012	0.0067	0.0109	0.0627
GORONTALO	GORONTALO	710100	0.0254	0.0012	0.0102	0.0368	0.0037	0.0095	0.0094	0.0005	0.0231	0.0003	0.0002	0.0012	0.0009	0.0026	0.0625
J A M B I	KERINCI	150100	0.0062	0.008	0.0102	0.0244	0.0023	0.0095	0.0116	0.0025	0.0259	0.0012	0.0009	0.0012	0.0067	0.01	0.0603
BALI	GIANYAR	510400	0.0153	0.008	0.0214	0.0447	0.0037	0.0011	0.0048	0.0003	0.0099	0.0012	0.0009	0.0012	0.0019	0.0052	0.0598
RIAU	ROKAN HULU	140400	0.0153	0.0036	0.0102	0.0291	0.0037	0.0048	0.0116	0.0049	0.025	0.0025	0.0009	0.0003	0.0019	0.0056	0.0597
KALIMANTAN SELATAN	TABALONG	630900	0.0062	0.0036	0.0214	0.0312	0.0023	0.0048	0.0116	0.0025	0.0212	0.0012	0.0009	0.002	0.0019	0.006	0.0584
LAMPUNG	WAY KANAN	180300	0.0034	0.0012	0.0335	0.0381	0.0023	0.0011	0.0048	0.0003	0.0085	0.0025	0.0009	0.0012	0.0067	0.0113	0.0579
KALIMANTAN BARAT	SAMBAS	610100	0.0062	0.0036	0.0214	0.0312	0.0023	0.0048	0.0116	0.0005	0.0192	0.0012	0.0009	0.0032	0.0019	0.0072	0.0576
BALI	TABANAN	510200	0.0062	0.0036	0.0214	0.0312	0.0023	0.0024	0.0116	0.0012	0.0175	0.0012	0.0009	0.002	0.004	0.0081	0.0568
SUMATERA BARAT	PASAMAN	130800	0.0153	0.0036	0.0048	0.0237	0.0023	0.0048	0.0116	0.0003	0.019	0.0025	0.0009	0.002	0.0067	0.0121	0.0548
JAWA TENGAH	BOYOLALI	330900	0.0254	0.0036	0.0102	0.0392	0.0037	0.0007	0.0048	0.0005	0.0097	0.0025	0.0004	0.0003	0.0019	0.0051	0.054
SULAWESI SELATAN	BONE	731100	0.0062	0.0036	0.0102	0.02	0.0023	0.0095	0.0116	0.0012	0.0246	0.0025	0.0009	0.0012	0.004	0.0086	0.0532
RIAU	PELALAWAN	140400	0.0062	0.0036	0.0102	0.02	0.0023	0.0048	0.0094	0.0005	0.017	0.0025	0.0031	0.0032	0.0067	0.0155	0.0525
KALIMANTAN SELATAN	HULU SUNGAI UTARA	630800	0.0062	0.0036	0.0102	0.02	0.0023	0.0024	0.0116	0.0049	0.0212	0.0025	0.0009	0.0032	0.004	0.0106	0.0518
BANTEN	LEBAK	320200	0.0153	0.008	0.0102	0.0335	0.0023	0.0024	0.0048	0.0025	0.012	0.0012	0.0009	0.002	0.0019	0.006	0.0515
KALIMANTAN TIMUR	KUTAI TIMUR	640200	0.0062	0.0021	0.0214	0.0297	0.0023	0.0024	0.0116	0.0012	0.0175	0.0012	0.0004	0.0005	0.0019	0.004	0.0512
SUMATERA UTARA	DAIRI	120800	0.0034	0.0012	0.0335	0.0381	0.0023	0.0007	0.0048	0.0005	0.0083	0.0012	0.0004	0.0012	0.0019	0.0047	0.0511
NUSA TENGGARA TIMUR	NGADA	531100	0.0153	0.0036	0.0048	0.0237	0.0023	0.0048	0.0116	0.0049	0.0236	0.0012	0.0009	0.0005	0.0009	0.0035	0.0508
BALI	BULELENG	510800	0.0062	0.0036	0.0102	0.02	0.0023	0.0095	0.0116	0.0025	0.0259	0.0012	0.0002	0.0012	0.0019	0.0045	0.0504
NUSA TENGGARA TIMUR	SUMBA BARAT	530100	0.002	0.0036	0.0214	0.027	0.0023	0.0024	0.0094	0.0049	0.019	0.0006	0.0004	0.0012	0.0019	0.0041	0.0501
R I A U	BENGKALIS	140500	0.0062	0.0036	0.0102	0.02	0.0037	0.0095	0.0116	0.0012	0.026	0.0006	0.0002	0.0005	0.0009	0.0022	0.0482
R I A U	INDRAGIRI HILIR	140200	0.0062	0.0012	0.0048	0.0122	0.0023	0.0048	0.0116	0.0049	0.0236	0.0041	0.0031	0.0032	0.0019	0.0123	0.0481
RIAU	KUANTAN SENGGIGI	140100	0.0034	0.0021	0.0214	0.0269	0.0023	0.0011	0.0116	0.0012	0.0162	0.0012	0.0009	0.0012	0.0009	0.0042	0.0473
BALI	BADUNG	510301	0.0062	0.0036	0.0214	0.0312	0.0023	0.0011	0.0048	0.0003	0.0085	0.0012	0.0009	0.0012	0.004	0.0073	0.047
NUSA TENGGARA BARAT	LOMBOK TIMUR	520300	0.0062	0.0036	0.0102	0.02	0.003	0.0024	0.0116	0.0049	0.0219	0.0012	0.0018	0.0012	0.0009	0.0051	0.047
JAWA TENGAH	KENDAL	332400	0.0034	0.0036	0.0102	0.0172	0.0037	0.0048	0.0116	0.0049	0.025	0.0006	0.0009	0.0012	0.0019	0.0046	0.0468
JAMBI	TANJUNG JABUNG TIMUR	150500	0.0034	0.0021	0.0214	0.0269	0.0023	0.0024	0.0094	0.0005	0.0146	0.0012	0.0009	0.0012	0.0019	0.0052	0.0467
SUMATERA SELATAN	MUSI RAWAS	160500	0.0062	0.0036	0.0102	0.02	0.0037	0.0048	0.0048	0.0049	0.0182	0.0041	0.0031	0.0003	0.0009	0.0084	0.0466
LAMPUNG	LAMPUNG UTARA	180300	0.0062	0.0036	0.0214	0.0312	0.0023	0.0024	0.0048	0.0005	0.01	0.0025	0.0002	0.0005	0.0019	0.0051	0.0463
JAWA TIMUR	TULUNGAGUNG	350400	0.002	0.0036	0.0102	0.0158	0.0037	0.0095	0.0094	0.0005	0.0231	0.0012	0.0009	0.0012	0.004	0.0073	0.0462
JAWA TIMUR	BLITAR	350500	0.0062	0.0036	0.0102	0.02	0.0037	0.0024	0.0094	0.0005	0.016	0.0012	0.0004	0.0012	0.0067	0.0095	0.0455
JAMBI	TEBO	150200	0.0062	0.0036	0.0102	0.02	0.0037	0.0011	0.0094	0.0005	0.0147	0.0025	0.0018	0.002	0.004	0.0103	0.045
JAWA TENGAH	KEBUMEN	330500	0.0062	0.0036	0.0102	0.02	0.0023	0.0048	0.0116	0.0012	0.0199	0.0006	0.0009	0.0012	0.0019	0.0046	0.0445
SULAWESI SELATAN	PINRANG	731500	0.0034	0.0036	0.0102	0.0172	0.003	0.0095	0.0048	0.0012	0.0185	0.0025	0.0031	0.0012	0.0019	0.0087	0.0444
SULAWESI SELATAN	MAROS	730800	0.0062	0.0036	0.0214	0.0312	0.0023	0.0011	0.0048	0.0005	0.0087	0.0012	0.0009	0.0003	0.0019	0.0043	0.0442
JAWA TIMUR	JOMBANG	351700	0.0062	0.0036	0.0102	0.02	0.0023	0.0011	0.0116	0.0025	0.0175	0.0012	0.0009	0.002	0.0019	0.006	0.0435
KALIMANTAN TIMUR	PASIR	640100	0.0062	0.0036	0.0102	0.02	0.0023	0.0024	0.0116	0.0025	0.0188	0.0012	0.0009	0.0012	0.0009	0.0042	0.043
JAWA TIMUR	BONDOWOSO	351100	0.0062	0.0012	0.0025	0.0099	0.0037	0.0095	0.0116	0.0049	0.0297	0.0012	0.0009	0.0003	0.0005	0.0029	0.0425
JAWA BARAT	KARAWANG	321700	0.002	0.0012	0.0102	0.0134	0.0037	0.0095	0.0116	0.0012	0.026	0.0003	0.0002	0.0012	0.0009	0.0026	0.042
SULAWESI SELATAN	LUWU	731700	0.0062	0.0021	0.0025	0.0108	0.0023	0.0095	0.0116	0.0012	0.0246	0.0012	0.0002	0.0012	0.004	0.0066	0.042
JAWA TENGAH	SUKOHARJO	331100	0.0062	0.0036	0.0102	0.02	0.0023	0.0024	0.0116	0.0012	0.0175	0.0006	0.0009	0.0005	0.0019	0.0039	0.0414
SUMATERA UTARA	ASAHAN	120600	0.002	0.0012	0.0102	0.0134	0.0037	0.0095	0.0094	0.0005	0.0231	0.0025	0.0002	0.0012	0.0009	0.0048	0.0413
SUMATERA UTARA	LANGKAT	121100	0.002	0.0012	0.0102	0.0134	0.0037	0.0095	0.0094	0.0005	0.0231	0.0025	0.0002	0.0012	0.0009	0.0048	0.0413
SUMATERA UTARA	SIMALUNGUN	120700	0.002	0.0012	0.0102	0.0134	0.0037	0.0095	0.0094	0.0005	0.0231	0.0025	0.0002	0.0012	0.0009	0.0048	0.0413
JAWA TENGAH	KARANG ANYAR	331300	0.0034	0.0012	0.0102	0.0148	0.0023	0.0007	0.0116	0.0003	0.0149	0.0012	0.0031	0.0032	0.004	0.0115	0.0412
JAWA TENGAH	MAGELANG	330800	0.0062	0.0036	0.0102	0.02	0.0023	0.0024	0.0094	0.0012	0.0153	0.0012	0.0009	0.0012	0.0019	0.0052	0.0405
SULAWESI TENGAH	TOLI TOLI	720400	0.0062	0.0036	0.0025	0.0123	0.0037	0.0095	0.0048	0.0049	0.0229	0.0012	0.0009	0.0012	0.0019	0.0052	0.0404
SULAWESI SELATAN	TAKALAR	730500	0.0062	0.0036	0.0102	0.02	0.003	0.0007	0.0116	0.0012	0.0165	0.0012	0.0009	0.0012	0.0005	0.0038	0.0403
JAWA BARAT	SUMEDANG	321300	0.0062	0.008	0.0102	0.0244	0.0023	0.0024	0.0048	0.0049	0.0144	0.0003	0.0002	0.0003	0.0005	0.0013	0.0401
J A M B I	BUNGO	150200	0.0062	0.0036	0.0102	0.02	0.0023	0.0024	0.0048	0.0049	0.0144	0.0012	0.0009	0.0012	0.0019	0.0052	0.0396
JAWA TENGAH	KLATEN	331000	0.002	0.0012	0.0048	0.008	0.0023	0.0011	0.0116	0.0005	0.0155	0.0041	0.0031	0.002	0.0067	0.0159	0.0394
NUSA TENGGARA TIMUR	MANGGARAI	531200	0.0034	0.0021	0.0048	0.0103	0.0023	0.0095	0.0116	0.0025	0.0259	0.0006	0.0009	0.0012	0.0005	0.0032	0.0394
JAWA BARAT	SUKABUMI	320400	0.002	0.0012	0.0102	0.0134	0.0037	0.0095	0.0094	0.0005	0.0231	0.0003	0.0002	0.0012	0.0009	0.0026	0.0391
KALIMANTAN BARAT	KAPUAS HULU	610600	0.002	0.0012	0.0102	0.0134	0.0037	0.0095	0.0094	0.0005	0.0231	0.0003	0.0002	0.0012	0.0009	0.0026	0.0391
KALIMANTAN BARAT	KETAPANG	610400	0.002	0.0012	0.0102	0.0134	0.0037	0.0095	0.0094	0.0005	0.0231	0.0003	0.0002	0.0012	0.0009	0.0026	0.0391
KALIMANTAN BARAT	SANGGAU	610300	0.002	0.0012	0.0102	0.0134	0.0037	0.0095	0.0094	0.0005	0.0231	0.0003	0.0002	0.0012	0.0009	0.0026	0.0391
KALIMANTAN TENGAH	BARITO SELATAN	620400	0.002	0.0012	0.0102	0.0134	0.0037	0.0095	0.0094	0.0005	0.0231	0.0003	0.0002	0.0012	0.0009	0.0026	0.0391
KALIMANTAN SELATAN	HULU SUNGAI SELATAN	630600	0.002	0.0012	0.0102	0.0134	0.0037	0.0095	0.0094	0.0005	0.0231	0.0003	0.0002	0.0012	0.0009	0.0026	0.0391
KALIMANTAN SELATAN	HULU SUNGAI TENGAH	630700	0.002	0.0012	0.0102	0.0134	0.0037	0.0095	0.0094	0.0005	0.0231	0.0003	0.0002	0.0012	0.0009	0.0026	0.0391
KALIMANTAN SELATAN	TAPIN	630500	0.002	0.0012	0.0102	0.0134	0.0037	0.0095	0.0094	0.0005	0.0231	0.0003	0.0002	0.0012	0.0009	0.0026	0.0391
SULAWESI TENGAH	DONGGALA	720300	0.002	0.0012	0.0102	0.0134	0.0037	0.0095	0.0094	0.0005	0.0231	0.0003	0.0002	0.0012	0.0009	0.0026	0.0391
SULAWESI TENGGARA	BUTON	740100	0.002	0.0012	0.0102	0.0134	0.0037	0.0095	0.0094	0.0005	0.0231	0.0003	0.0002	0.0012	0.0009	0.0026	0.0391
PAPUA	FAKFAK	820500	0.002	0.0012	0.0102	0.0134	0.0037	0.0095	0.0094	0.0005	0.0231	0.0003	0.0002	0.0012	0.0009	0.0026	0.0391
PAPUA	JAYAWIJAYA	820200	0.002	0.0012	0.0102	0.0134	0.0037	0.0095	0.0094	0.0005	0.0231	0.0003	0.0002	0.0012	0.0009	0.0026	0.0391
PAPUA	MIMIKA	820500	0.002	0.0012	0.0102	0.0134	0.0037	0.0095	0.0094	0.0005	0.0231	0.0003	0.0002	0.0012	0.0009	0.0026	0.0391
SUMATERA BARAT	SOLOK	130200	0.0062	0.0036	0.0025	0.0123	0.0023	0.0095	0.0116	0.0012	0.0246	0.0006	0.0002	0.0005	0.0009	0.0022	0.0391
LAMPUNG	LAMPUNG SELATAN	180101	0.0062	0.0036	0.0102	0.02	0.0023	0.0011	0.0094	0.0003	0.0131	0.0012	0.0009	0.0012	0.0019	0.0052	0.0383
SUMATERA SELATAN	OGAN KOMERING ILIR	160200	0.0034	0.0036	0.0102	0.0172	0.0023	0.0024	0.0094	0.0025	0.0166	0.0012	0.0009	0.0012	0.0009	0.0042	0.038
JAWA TIMUR	SIDOARJO	351500	0.0062	0.0036	0.0102	0.02	0.0037	0.0011	0.002	0.0005	0.0073	0.0012	0.0009	0.0012	0.0067	0.01	0.0373
JAWA TIMUR	PONOROGO	350200	0.0034	0.0021	0.0025	0.008	0.0023	0.0048	0.0116	0.0049	0.0236	0.0012	0.0009	0.0012	0.0019	0.0052	0.0368
JAWA TENGAH	PEKALONGAN	332600	0.0034	0.0012	0.0102	0.0148	0.0023	0.0024	0.0116	0.0003	0.0166	0.0012	0.0009	0.0012	0.0019	0.0052	0.0366
JAWA TIMUR	GRESIK	352500	0.002	0.0021	0.0025	0.0066	0.0037	0.0048	0.0116	0.0049	0.025	0.0012	0.0009	0.0005	0.0019	0.0045	0.0361
DIY	GUNUNG KIDUL	340300	0.0062	0.008	0.0102	0.0244	0.0023	0.0011	0.0048	0.0003	0.0085	0.0003	0.0004	0.0005	0.0019	0.0031	0.036
SUMATERA SELATAN	MUARA ENIM	160300	0.0034	0.0036	0.0025	0.0095	0.0023	0.0024	0.0094	0.0012	0.0153	0.0041	0.0018	0.0012	0.004	0.0111	0.0359
JAWA BARAT	CIREBON	321100	0.002	0.0036	0.0102	0.0158	0.0023	0.0024	0.0094	0.0003	0.0144	0.0012	0.0009	0.0012	0.0019	0.0052	0.0354
KALIMANTAN TIMUR	BERAU	640300	0.002	0.0021	0.0048	0.0089	0.0037	0.0048	0.0116	0.0049	0.025	0.0003	0.0002	0.0005	0.0005	0.0015	0.0354
JAWA TENGAH	KUDUS	331900	0.0034	0.0036	0.0102	0.0172	0.0037	0.0011	0.0048	0.0012	0.0108	0.0025	0.0009	0.002	0.0019	0.0073	0.0353
NUSA TENGGARA BARAT	LOMBOK BARAT	520101	0.0062	0.0036	0.0048	0.0146	0.0023	0.0024	0.0094	0.0025	0.0166	0.0012	0.0004	0.0012	0.0009	0.0037	0.0349
KALIMANTAN BARAT	PONTIANAK	610200	0.002	0.0012	0.0102	0.0134	0.0023	0.0048	0.0116	0.0012	0.0199	0.0003	0.0002	0.0005	0.0005	0.0015	0.0348
BANTEN	SERANG	322000	0.0034	0.0021	0.0048	0.0103	0.003	0.0024	0.0116	0.0049	0.0219	0.0003	0.0004	0.0012	0.0005	0.0024	0.0346
JAWA BARAT	BEKASI	321801	0.002	0.0021	0.0048	0.0089	0.0023	0.0024	0.0116	0.0012	0.0175	0.0041	0.0002	0.002	0.0019	0.0082	0.0346
BANGKA BELITUNG	BANGKA	160700	0.002	0.0021	0.0102	0.0143	0.0023	0.0095	0.002	0.0049	0.0187	0.0003	0.0002	0.0005	0.0005	0.0015	0.0345
JAWA BARAT	BOGOR	320300	0.0062	0.0036	0.0102	0.02	0.0023	0.0011	0.0048	0.0012	0.0094	0.0012	0.0004	0.0012	0.0019	0.0047	0.0341
JAWA TENGAH	JEPARA	332000	0.0062	0.0021	0.0025	0.0108	0.0023	0.0024	0.0116	0.0005	0.0168	0.0025	0.0009	0.0012	0.0019	0.0065	0.0341
JAWA TIMUR	JEMBER	350900	0.002	0.0012	0.0102	0.0134	0.0023	0.0024	0.0116	0.0012	0.0175	0.0006	0.0004	0.0003	0.0019	0.0032	0.0341
SULAWESI TENGAH	MOROWALI	720200	0.002	0.0012	0.0025	0.0057	0.0037	0.0095	0.0116	0.0005	0.0253	0.0003	0.0002	0.0003	0.0019	0.0027	0.0337
NUSA TENGGARA BARAT	DOMPU	520500	0.0062	0.0036	0.0102	0.02	0.003	0.0007	0.0048	0.0012	0.0097	0.0012	0.0009	0.0012	0.0005	0.0038	0.0335
SULAWESI SELATAN	BARRU	731000	0.0062	0.0036	0.0102	0.02	0.0023	0.0011	0.0048	0.0012	0.0094	0.0006	0.0009	0.0005	0.0019	0.0039	0.0333
SUMATERA UTARA	TANAH KARO	120900	0.0062	0.0036	0.0102	0.02	0.0023	0.0024	0.0048	0.0005	0.01	0.0006	0.0004	0.0012	0.0009	0.0031	0.0331
KALIMANTAN TIMUR	KUTAI KERTANEGARA	640200	0.002	0.0012	0.0025	0.0057	0.0037	0.0048	0.0116	0.0005	0.0206	0.0025	0.0009	0.0012	0.0019	0.0065	0.0328
JAWA TENGAH	PEMALANG	332700	0.0034	0.0036	0.0048	0.0118	0.0023	0.0024	0.0094	0.0003	0.0144	0.0012	0.0009	0.002	0.0019	0.006	0.0322
BENGKULU	BENGKULU SELATAN	170100	0.0034	0.0036	0.0102	0.0172	0.0023	0.0011	0.0048	0.0025	0.0107	0.0012	0.0009	0.0012	0.0009	0.0042	0.0321
BANTEN	TANGERANG	321901	0.0062	0.0021	0.0102	0.0185	0.0023	0.0024	0.0048	0.0003	0.0098	0.0003	0.0004	0.0012	0.0019	0.0038	0.0321
JAWA TIMUR	LAMONGAN	352400	0.0034	0.0036	0.0025	0.0095	0.0023	0.0024	0.0116	0.0005	0.0168	0.0012	0.0009	0.0012	0.0019	0.0052	0.0315
JAWA TENGAH	CILACAP	330100	0.002	0.0021	0.0048	0.0089	0.0023	0.0024	0.0116	0.0012	0.0175	0.0006	0.0009	0.0012	0.0019	0.0046	0.031
SULAWESI TENGAH	POSO	720200	0.002	0.0012	0.0102	0.0134	0.0037	0.0011	0.0094	0.0005	0.0147	0.0003	0.0002	0.0012	0.0009	0.0026	0.0307
JAWA TIMUR	BANYUWANGI	351000	0.0034	0.0036	0.0025	0.0095	0.0023	0.0024	0.0116	0.0012	0.0175	0.0006	0.0002	0.0005	0.0019	0.0032	0.0302
SUMATERA SELATAN	MUSI BANYUASIN	160600	0.0034	0.0021	0.0048	0.0103	0.0023	0.0024	0.0116	0.0005	0.0168	0.0006	0.0002	0.0012	0.0005	0.0025	0.0296
NUSA TENGGARA TIMUR	TIMOR TENGAH UTARA	530500	0.002	0.0012	0.0025	0.0057	0.0023	0.0095	0.0048	0.0049	0.0215	0.0006	0.0002	0.0005	0.0009	0.0022	0.0294
JAWA TIMUR	PAMEKASAN	352800	0.0034	0.0012	0.0025	0.0071	0.0023	0.0024	0.0116	0.0025	0.0188	0.0003	0.0009	0.0003	0.0019	0.0034	0.0293
JAWA TIMUR	BANGKALAN	352600	0.002	0.0012	0.0025	0.0057	0.0023	0.0024	0.0116	0.0025	0.0188	0.0003	0.0009	0.0012	0.0019	0.0043	0.0288
NUSA TENGGARA BARAT	BIMA	520600	0.0034	0.0021	0.0102	0.0157	0.0023	0.0011	0.0048	0.0003	0.0085	0.0003	0.0002	0.002	0.0009	0.0034	0.0276
JAWA TENGAH	BANYUMAS	330200	0.002	0.0012	0.0025	0.0057	0.0023	0.0024	0.0116	0.0005	0.0168	0.0003	0.0009	0.0012	0.0019	0.0043	0.0268
JAWA BARAT	BANDUNG	320600	0.0062	0.0036	0.0048	0.0146	0.0023	0.0024	0.0048	0.0012	0.0107	0.0003	0.0002	0.0005	0.0005	0.0015	0.0268
JAWA TIMUR	PASURUAN	351400	0.002	0.0012	0.0102	0.0134	0.0023	0.0007	0.0048	0.0003	0.0081	0.0012	0.0009	0.0012	0.0009	0.0042	0.0257
SUMATERA UTARA	LABUHAN BATU	120500	0.0034	0.0021	0.0025	0.008	0.0023	0.0024	0.0048	0.0012	0.0107	0.0012	0.0009	0.0012	0.0019	0.0052	0.0239
JAWA TIMUR	MOJOKERTO	351600	0.002	0.0012	0.0048	0.008	0.0037	0.0007	0.002	0.0003	0.0067	0.0012	0.0009	0.002	0.004	0.0081	0.0228
KALIMANTAN SELATAN	TANAH LAUT	630100	0.002	0.0012	0.0025	0.0057	0.0037	0.0048	0.0048	0.0005	0.0138	0.0003	0.0002	0.0012	0.0009	0.0026	0.0221
DIY	BANTUL	340200	0.0034	0.0012	0.0025	0.0071	0.0023	0.0011	0.0048	0.0003	0.0085	0.0006	0.0004	0.0012	0.0019	0.0041	0.0197
NUSA TENGGARA TIMUR	FLORES TIMUR	530800	0.002	0.0012	0.0025	0.0057	0.0037	0.0024	0.0048	0.0003	0.0112	0.0003	0.0002	0.0012	0.0009	0.0026	0.0195
LAMPUNG	LAMPUNG TIMUR	180200	0.002	0.0012	0.0025	0.0057	0.0023	0.0024	0.0048	0.0005	0.01	0.0006	0.0004	0.0012	0.0009	0.0031	0.0188
SUMATERA UTARA	DELI SERDANG	121000	0.002	0.0012	0.0025	0.0057	0.0023	0.0024	0.0048	0.0005	0.01	0.0006	0.0002	0.0003	0.0005	0.0016	0.0173
SUMATERA BARAT	KOTA SAWAH LUNTO	130302	0.0254	0.008	0.0214	0.0548	0.003	0.0095	0.0048	0.0049	0.0222	0.0025	0.0018	0.0012	0.0005	0.006	0.083
GORONTALO	KOTA GORONTALO	717100	0.0254	0.008	0.0214	0.0548	0.003	0.0024	0.0116	0.0025	0.0195	0.0025	0.0018	0.0005	0.0019	0.0067	0.081
R I A U	KOTA BATAM	147200	0.0153	0.0036	0.0214	0.0403	0.0023	0.0095	0.0116	0.0025	0.0259	0.0006	0.0009	0.0012	0.0019	0.0046	0.0708
SULAWESI UTARA	KOTA MANADO	717200	0.0062	0.0036	0.0102	0.02	0.003	0.0095	0.0116	0.0025	0.0266	0.0041	0.0031	0.0032	0.0067	0.0171	0.0637
JAWA TIMUR	KOTA KEDIRI	357100	0.0062	0.0036	0.0214	0.0312	0.0023	0.0095	0.0116	0.0025	0.0259	0.0012	0.0004	0.0012	0.0019	0.0047	0.0618
SUMATERA UTARA	KOTA SIBOLGA	127100	0.0153	0.008	0.0102	0.0335	0.0023	0.0095	0.0048	0.0049	0.0215	0.0012	0.0009	0.0012	0.0019	0.0052	0.0602
JAWA BARAT	KOTA CIREBON	327400	0.0062	0.008	0.0214	0.0356	0.003	0.0024	0.0116	0.0012	0.0182	0.0012	0.0009	0.0012	0.0019	0.0052	0.059
NUSA TENGGARA TIMUR	KOTA KUPANG	530302	0.0153	0.0036	0.0102	0.0291	0.0023	0.0095	0.0048	0.0025	0.0191	0.0012	0.0009	0.0012	0.0019	0.0052	0.0534
JAWA TIMUR	KOTA MOJOKERTO	357600	0.0034	0.0021	0.0102	0.0157	0.0023	0.0095	0.0116	0.0025	0.0259	0.0012	0.0009	0.002	0.004	0.0081	0.0497
SULAWESI SELATAN	KOTA PARE-PARE	737200	0.0062	0.008	0.0102	0.0244	0.0023	0.0011	0.0094	0.0049	0.0177	0.0012	0.0009	0.0012	0.004	0.0073	0.0494
JAWA BARAT	KOTA BOGOR	327100	0.0062	0.0036	0.0214	0.0312	0.0037	0.0024	0.0048	0.0003	0.0112	0.0012	0.0018	0.002	0.0019	0.0069	0.0493
R I A U	KOTA DUMAI	140500	0.0062	0.0036	0.0101	0.0199	0.0023	0.0095	0.0116	0.0005	0.0239	0.0012	0.0004	0.0012	0.0019	0.0047	0.0485
LAMPUNG	KOTA BANDAR LAMPUNG	187100	0.0062	0.0021	0.0102	0.0185	0.0023	0.0095	0.0116	0.0012	0.0246	0.0006	0.0009	0.0012	0.0009	0.0036	0.0467
SUMATERA BARAT	KOTA PADANG	137100	0.0062	0.0036	0.0102	0.02	0.0023	0.0024	0.0116	0.0025	0.0188	0.0012	0.0009	0.002	0.0019	0.006	0.0448
JAWA TENGAH	KOTA TEGAL	337600	0.0062	0.0036	0.0102	0.02	0.0023	0.0024	0.0094	0.0049	0.019	0.0012	0.0009	0.0012	0.0019	0.0052	0.0442
JAWA TIMUR	KOTA MADIUN	357700	0.0062	0.0036	0.0214	0.0312	0.0023	0.0024	0.0048	0.0005	0.01	0.0003	0.0002	0.0005	0.0005	0.0015	0.0427
NUSA TENGGARA BARAT	KOTA MATARAM	520102	0.0062	0.0036	0.0025	0.0123	0.0037	0.0095	0.0116	0.0025	0.0273	0.0006	0.0002	0.0012	0.0005	0.0025	0.0421
JAWA TIMUR	KOTA SURABAYA	357800	0.0062	0.0021	0.0102	0.0185	0.0023	0.0024	0.0116	0.0012	0.0175	0.0012	0.0009	0.002	0.0019	0.006	0.042
BALI	KOTA DENPASAR	510302	0.0062	0.0036	0.0048	0.0146	0.0023	0.0024	0.0116	0.0025	0.0188	0.0012	0.0009	0.002	0.004	0.0081	0.0415
JAWA BARAT	KOTA BANDUNG	327300	0.0062	0.0036	0.0102	0.02	0.0023	0.0024	0.0116	0.0005	0.0168	0.0006	0.0004	0.0012	0.0009	0.0031	0.0399
KALIMANTAN TIMUR	KOTA SAMARINDA	647200	0.002	0.0012	0.0102	0.0134	0.0037	0.0095	0.0094	0.0012	0.0238	0.0003	0.0002	0.0012	0.0009	0.0026	0.0398
SULAWESI TENGGARA	KOTA KENDARI	740302	0.0062	0.0036	0.0048	0.0146	0.0023	0.0024	0.0116	0.0049	0.0212	0.0006	0.0009	0.0012	0.0009	0.0036	0.0394
KALIMANTAN TIMUR	KOTA BALIKPAPAN	647100	0.002	0.0012	0.0102	0.0134	0.0037	0.0095	0.0094	0.0005	0.0231	0.0003	0.0002	0.0012	0.0009	0.0026	0.0391
SULAWESI UTARA	KOTA BITUNG	710302	0.002	0.0012	0.0102	0.0134	0.0037	0.0095	0.0094	0.0005	0.0231	0.0003	0.0002	0.0012	0.0009	0.0026	0.0391
SUMATERA UTARA	KOTA TANJUNG BALAI	127200	0.002	0.0012	0.0102	0.0134	0.0037	0.0095	0.0094	0.0005	0.0231	0.0003	0.0002	0.0012	0.0009	0.0026	0.0391
JAWA BARAT	KOTA SUKABUMI	327200	0.002	0.0012	0.0102	0.0134	0.0037	0.0095	0.0094	0.0005	0.0231	0.0003	0.0002	0.0012	0.0009	0.0026	0.0391
SUMATERA UTARA	KOTA TEBING TINGGI	127400	0.0062	0.0036	0.0102	0.02	0.0037	0.0007	0.0094	0.0005	0.0143	0.0012	0.0004	0.0012	0.0019	0.0047	0.039
R I A U	KOTA PEKAN BARU	147100	0.002	0.0012	0.0048	0.008	0.003	0.0095	0.0116	0.0025	0.0266	0.0006	0.0004	0.0012	0.0019	0.0041	0.0387
BANGKA BELITUNG	KOTA PANGKAL PINANG	167200	0.0062	0.0021	0.0102	0.0185	0.0023	0.0011	0.0094	0.0012	0.014	0.0012	0.0018	0.0005	0.0005	0.004	0.0365
DKI JAKARTA	DKI JAKARTA	0	0.0034	0.0012	0.0048	0.0094	0.0023	0.0095	0.0116	0.0005	0.0239	0.0006	0.0004	0.0003	0.0019	0.0032	0.0365
JAWA TENGAH	KOTA SEMARANG	337400	0.0062	0.0036	0.0025	0.0123	0.0023	0.0048	0.0116	0.0012	0.0199	0.0006	0.0009	0.0012	0.0009	0.0036	0.0358
JAWA TIMUR	KOTA MALANG	357300	0.0062	0.0036	0.0025	0.0123	0.0023	0.0048	0.0116	0.0012	0.0199	0.0012	0.0009	0.0003	0.0009	0.0033	0.0355
D.I. YOGYAKARTA	KOTA YOGYAKARTA	347100	0.002	0.0021	0.0102	0.0143	0.0023	0.0024	0.0116	0.0012	0.0175	0.0006	0.0009	0.0012	0.0009	0.0036	0.0354
SUMATERA UTARA	KOTA BINJAI	127600	0.0034	0.0021	0.0102	0.0157	0.0037	0.0095	0.002	0.0012	0.0164	0.0003	0.0004	0.0012	0.0009	0.0028	0.0349
JAWA TENGAH	KOTA SURAKARTA	337200	0.0062	0.0036	0.0048	0.0146	0.0023	0.0024	0.0116	0.0012	0.0175	0.0003	0.0002	0.0012	0.0009	0.0026	0.0347
BENGKULU	KOTA BENGKULU	177100	0.002	0.0021	0.0102	0.0143	0.0023	0.0024	0.0116	0.0012	0.0175	0.0006	0.0009	0.0005	0.0005	0.0025	0.0343
SUMATERA UTARA	KOTA PEMATANG SIANTAR	127300	0.0062	0.0036	0.0102	0.02	0.0037	0.0011	0.002	0.0005	0.0073	0.0025	0.0009	0.0012	0.0019	0.0065	0.0338
SUMATERA UTARA	KOTA MEDAN	127500	0.0034	0.0021	0.0102	0.0157	0.0023	0.0024	0.0094	0.0003	0.0144	0.0012	0.0002	0.0012	0.0009	0.0035	0.0336
BANTEN	KOTA TANGERANG	321902	0.0034	0.0021	0.0102	0.0157	0.003	0.0024	0.0048	0.0012	0.0114	0.0006	0.0009	0.0012	0.0009	0.0036	0.0307
SUMATERA SELATAN	KOTA PALEMBANG	167100	0.002	0.0012	0.0025	0.0057	0.0023	0.0024	0.0116	0.0025	0.0188	0.0012	0.0009	0.002	0.0019	0.006	0.0305
JAWA TENGAH	KOTA PEKALONGAN	337500	0.0034	0.0021	0.0048	0.0103	0.0023	0.0011	0.0094	0.0003	0.0131	0.0025	0.0009	0.0012	0.0019	0.0065	0.0299
JAWA TIMUR	KOTA PROBOLINGGO	357400	0.0062	0.0036	0.0048	0.0146	0.0037	0.0011	0.0048	0.0012	0.0108	0.0012	0.0009	0.0012	0.0009	0.0042	0.0296
BANTEN	KOTA CILEGON	322000	0.0034	0.0021	0.0102	0.0157	0.0023	0.0011	0.0048	0.0025	0.0107	0.0003	0.0002	0.0012	0.0005	0.0022	0.0286
JAWA BARAT	KOTA BEKASI	321802	0.0034	0.0012	0.0048	0.0094	0.0023	0.0024	0.0048	0.0005	0.01	0.0003	0.0002	0.0012	0.0009	0.0026	0.022

## Sheet: econ_03
prov_kppod_03	kab_kppod_03	kabID97	PDRB_cap_03	PDRB_growth_03	hdi_03	subtot_econpot_03	valadd_prim_03	valadd_sec_03	valadd_tert_03	subtot_econstr_03	tot_econ_03
SUMATERA UTARA	ASAHAN	120600	0.0247	0.0222	0.0051	0.052	0.0042	0.0069	0.0004	0.0115	0.0635
SUMATERA UTARA	LABUHAN BATU	120500	0.0247	0.0222	0.0051	0.052	0.0042	0.0069	0.0004	0.0115	0.0635
KALIMANTAN TIMUR	BERAU	640300	0.0247	0.0222	0.0051	0.052	0.0076	0.0023	0.0008	0.0107	0.0627
JAWA BARAT	PURWAKARTA	321600	0.0247	0.0222	0.0051	0.052	0.0009	0.0069	0.0019	0.0097	0.0617
JAWA TENGAH	CILACAP	330100	0.0247	0.0222	0.0051	0.052	0.0009	0.0069	0.0019	0.0097	0.0617
KALIMANTAN TIMUR	KUTAI TIMUR	640200	0.0247	0.0222	0.0051	0.052	0.0076	0.001	0.0004	0.009	0.061
SULAWESI SELATAN	LUWU UTARA	731700	0.0247	0.0222	0.0051	0.052	0.0076	0.0006	0.0004	0.0086	0.0606
JAWA BARAT	BEKASI	321801	0.0247	0.0222	0.0051	0.052	0.0009	0.0069	0.0004	0.0082	0.0602
JAWA BARAT	INDRAMAYU	321400	0.0247	0.0222	0.0008	0.0477	0.0076	0.0023	0.0004	0.0103	0.058
KALIMANTAN SELATAN	TABALONG	630900	0.0247	0.0222	0.0014	0.0483	0.0076	0.0006	0.0004	0.0086	0.0569
KALIMANTAN TIMUR	PASIR	640100	0.0247	0.0133	0.0051	0.0431	0.0076	0.0023	0.0004	0.0103	0.0534
SULAWESI TENGAH	MOROWALI	720200	0.0247	0.0133	0.0051	0.0431	0.0076	0.001	0.0008	0.0094	0.0525
JAMBI	TANJUNG JABUNG TIMUR	150500	0.0247	0.0133	0.0051	0.0431	0.0076	0.001	0.0004	0.009	0.0521
SUMATERA UTARA	TANAH KARO	120900	0.0126	0.0222	0.0079	0.0427	0.0076	0.0006	0.0008	0.009	0.0517
SULAWESI TENGAH	TOLI TOLI	720400	0.0126	0.0222	0.0051	0.0399	0.0076	0.001	0.0019	0.0105	0.0504
KALIMANTAN TENGAH	BARITO UTARA	620500	0.0247	0.0062	0.0079	0.0388	0.0076	0.001	0.0008	0.0094	0.0482
JAWA TIMUR	GRESIK	352500	0.0247	0.0062	0.0079	0.0388	0.0009	0.0069	0.0008	0.0086	0.0474
BALI	BADUNG	510301	0.0247	0.0062	0.0079	0.0388	0.0009	0.001	0.0048	0.0067	0.0455
SULAWESI UTARA	MINAHASA	710300	0.0062	0.0222	0.0086	0.037	0.0042	0.0023	0.0019	0.0084	0.0454
KALIMANTAN SELATAN	HULU SUNGAI UTARA	630800	0.0126	0.0222	0.0008	0.0356	0.0076	0.001	0.0008	0.0094	0.045
JAWA TIMUR	SIDOARJO	351500	0.0247	0.0016	0.0086	0.0349	0.0009	0.0069	0.0019	0.0097	0.0446
SULAWESI TENGAH	BANGGAI	720100	0.0062	0.0222	0.0051	0.0335	0.0076	0.0023	0.0008	0.0107	0.0442
RIAU	PELALAWAN	140400	0.0062	0.0222	0.0051	0.0335	0.0076	0.0023	0.0004	0.0103	0.0438
KALIMANTAN TIMUR	BULUNGAN	640400	0.0247	0.0016	0.0079	0.0342	0.0076	0.001	0.0004	0.009	0.0432
RIAU	KUANTAN SENGGIGI	140100	0.0062	0.0222	0.0051	0.0335	0.0076	0.001	0.0008	0.0094	0.0429
LAMPUNG	LAMPUNG TIMUR	180200	0.0062	0.0222	0.0051	0.0335	0.0076	0.001	0.0008	0.0094	0.0429
SUMATERA UTARA	DAIRI	120800	0.0062	0.0222	0.0051	0.0335	0.0076	0.001	0.0004	0.009	0.0425
KALIMANTAN TIMUR	NUNUKAN	640400	0.0062	0.0222	0.0051	0.0335	0.0076	0.001	0.0004	0.009	0.0425
JAWA TENGAH	KUDUS	331900	0.0247	0.0016	0.0051	0.0314	0.0009	0.0069	0.0019	0.0097	0.0411
SUMATERA SELATAN	MUSI BANYUASIN	160600	0.0247	0.0016	0.0051	0.0314	0.0076	0.001	0.0004	0.009	0.0404
KALIMANTAN TIMUR	KUTAI KERTANEGARA	640200	0.0247	0.0016	0.0051	0.0314	0.0076	0.001	0.0004	0.009	0.0404
SUMATERA SELATAN	MUARA ENIM	160300	0.0247	0.0016	0.0051	0.0314	0.0076	0.0006	0.0004	0.0086	0.04
RIAU	ROKAN HULU	140400	0.003	0.0222	0.0051	0.0303	0.0076	0.001	0.0008	0.0094	0.0397
PAPUA	MANOKWARI	820700	0.0247	0.003	0.0008	0.0285	0.0076	0.0023	0.0008	0.0107	0.0392
KALIMANTAN BARAT	SANGGAU	610300	0.0062	0.0222	0.0014	0.0298	0.0042	0.0043	0.0008	0.0093	0.0391
SULAWESI SELATAN	MAROS	730800	0.0062	0.0222	0.0051	0.0335	0.0042	0.0006	0.0004	0.0052	0.0387
SULAWESI TENGAH	DONGGALA	720300	0.0247	0.0016	0.0014	0.0277	0.0076	0.001	0.0008	0.0094	0.0371
PAPUA	SORONG	820600	0.0247	0.0016	0.0014	0.0277	0.0076	0.001	0.0004	0.009	0.0367
BANGKA BELITUNG	BANGKA	160700	0.0126	0.0062	0.0051	0.0239	0.0042	0.0069	0.0004	0.0115	0.0354
SULAWESI UTARA	SANGIHE	710400	0.003	0.0133	0.0079	0.0242	0.0076	0.001	0.0019	0.0105	0.0347
SULAWESI TENGGARA	KOLAKA	740400	0.0126	0.0062	0.0051	0.0239	0.0076	0.0023	0.0008	0.0107	0.0346
NUSA TENGGARA BARAT	LOMBOK TIMUR	520300	0.0247	0.0016	0.0008	0.0271	0.0042	0.001	0.0019	0.0071	0.0342
SUMATERA UTARA	LANGKAT	121100	0.0126	0.0062	0.0051	0.0239	0.0076	0.001	0.0004	0.009	0.0329
BANGKA BELITUNG	BELITUNG	160700	0.0126	0.0062	0.0051	0.0239	0.0042	0.0023	0.0019	0.0084	0.0323
BALI	GIANYAR	510400	0.0126	0.0062	0.0051	0.0239	0.0016	0.0023	0.0043	0.0082	0.0321
KALIMANTAN BARAT	PONTIANAK	610200	0.0126	0.003	0.0051	0.0207	0.0016	0.0069	0.0019	0.0104	0.0311
KALIMANTAN TENGAH	BARITO SELATAN	620400	0.0126	0.0062	0.0051	0.0239	0.0042	0.001	0.0019	0.0071	0.031
KALIMANTAN TENGAH	KAPUAS	620300	0.0062	0.0062	0.0079	0.0203	0.0076	0.001	0.0019	0.0105	0.0308
BALI	JEMBRANA	510100	0.0062	0.0062	0.0079	0.0203	0.0042	0.001	0.0048	0.01	0.0303
SULAWESI SELATAN	PANGKAJENE & KEPULAUAN	730900	0.0062	0.0133	0.0014	0.0209	0.0016	0.0069	0.0004	0.0089	0.0298
SUMATERA UTARA	DELI SERDANG	121000	0.0062	0.0062	0.0079	0.0203	0.0042	0.0043	0.0008	0.0093	0.0296
BANTEN	TANGERANG	321901	0.0062	0.0062	0.0079	0.0203	0.0009	0.0069	0.0008	0.0086	0.0289
SUMATERA UTARA	SIMALUNGUN	120700	0.0062	0.0062	0.0051	0.0175	0.0076	0.0023	0.0004	0.0103	0.0278
J A M B I	KERINCI	150100	0.0062	0.0062	0.0051	0.0175	0.0042	0.001	0.0043	0.0095	0.027
SULAWESI SELATAN	PINRANG	731500	0.0062	0.0062	0.0051	0.0175	0.0076	0.001	0.0008	0.0094	0.0269
NUSA TENGGARA BARAT	DOMPU	520500	0.0126	0.003	0.0008	0.0164	0.0076	0.001	0.0019	0.0105	0.0269
KALIMANTAN BARAT	KAPUAS HULU	610600	0.0062	0.0062	0.0014	0.0138	0.0076	0.001	0.0043	0.0129	0.0267
LAMPUNG	LAMPUNG BARAT	180302	0.003	0.0133	0.0014	0.0177	0.0076	0.0006	0.0008	0.009	0.0267
BALI	TABANAN	510200	0.0062	0.003	0.0079	0.0171	0.0042	0.001	0.0043	0.0095	0.0266
R I A U	BENGKALIS	140500	0.0062	0.0016	0.0079	0.0157	0.0042	0.0023	0.0043	0.0108	0.0265
JAWA TENGAH	KARANG ANYAR	331300	0.0062	0.0016	0.0079	0.0157	0.0016	0.0069	0.0019	0.0104	0.0261
DIY	GUNUNG KIDUL	340300	0.0062	0.0062	0.0051	0.0175	0.0042	0.0023	0.0019	0.0084	0.0259
PAPUA	JAYAWIJAYA	820200	0.0016	0.0133	0.0008	0.0157	0.0076	0.0006	0.0019	0.0101	0.0258
JAWA TIMUR	TULUNGAGUNG	350400	0.0062	0.0062	0.0051	0.0175	0.0016	0.0023	0.0043	0.0082	0.0257
SUMATERA BARAT	PESISIR SELATAN	130100	0.0062	0.003	0.0051	0.0143	0.0042	0.0023	0.0043	0.0108	0.0251
JAWA BARAT	CIAMIS	320900	0.0062	0.003	0.0051	0.0143	0.0042	0.0023	0.0043	0.0108	0.0251
JAMBI	TEBO	150200	0.003	0.0062	0.0051	0.0143	0.0076	0.001	0.0019	0.0105	0.0248
SULAWESI SELATAN	MAJENE	732000	0.003	0.0062	0.0051	0.0143	0.0076	0.001	0.0019	0.0105	0.0248
SULAWESI SELATAN	TANA TORAJA	731800	0.003	0.0062	0.0051	0.0143	0.0076	0.001	0.0019	0.0105	0.0248
SULAWESI SELATAN	GOWA	730600	0.003	0.0062	0.0051	0.0143	0.0076	0.001	0.0019	0.0105	0.0248
R I A U	INDRAGIRI HILIR	140200	0.0062	0.0062	0.0051	0.0175	0.0042	0.001	0.0019	0.0071	0.0246
J A M B I	BUNGO	150200	0.0062	0.0062	0.0051	0.0175	0.0042	0.001	0.0019	0.0071	0.0246
KALIMANTAN SELATAN	HULU SUNGAI SELATAN	630600	0.0062	0.0062	0.0051	0.0175	0.0042	0.001	0.0019	0.0071	0.0246
KALIMANTAN SELATAN	TAPIN	630500	0.0062	0.0062	0.0051	0.0175	0.0042	0.001	0.0019	0.0071	0.0246
JAWA BARAT	BANDUNG	320600	0.0062	0.0016	0.0079	0.0157	0.0009	0.0069	0.0008	0.0086	0.0243
BALI	BANGLI	510600	0.0062	0.003	0.0051	0.0143	0.0042	0.001	0.0043	0.0095	0.0238
SULAWESI SELATAN	ENREKANG	731600	0.003	0.0062	0.0051	0.0143	0.0076	0.001	0.0008	0.0094	0.0237
SUMATERA UTARA	TAPANULI UTARA	120400	0.0062	0.0016	0.0051	0.0129	0.0076	0.001	0.0019	0.0105	0.0234
NUSA TENGGARA TIMUR	NGADA	531100	0.0016	0.0062	0.0051	0.0129	0.0076	0.001	0.0019	0.0105	0.0234
JAWA TIMUR	KEDIRI	350600	0.003	0.0062	0.0051	0.0143	0.0042	0.0023	0.0019	0.0084	0.0227
KALIMANTAN SELATAN	TANAH LAUT	630100	0.0062	0.003	0.0051	0.0143	0.0042	0.0023	0.0019	0.0084	0.0227
JAWA TENGAH	KENDAL	332400	0.0062	0.0016	0.0051	0.0129	0.0016	0.0069	0.0008	0.0093	0.0222
SUMATERA BARAT	SOLOK	130200	0.0062	0.0062	0.0014	0.0138	0.0042	0.0023	0.0019	0.0084	0.0222
KALIMANTAN BARAT	KETAPANG	610400	0.0062	0.0062	0.0014	0.0138	0.0042	0.0023	0.0019	0.0084	0.0222
JAWA TENGAH	JEPARA	332000	0.003	0.0062	0.0051	0.0143	0.0016	0.0043	0.0019	0.0078	0.0221
JAWA TIMUR	MOJOKERTO	351600	0.0062	0.003	0.0051	0.0143	0.0016	0.0043	0.0019	0.0078	0.0221
LAMPUNG	LAMPUNG SELATAN	180101	0.003	0.003	0.0051	0.0111	0.0076	0.0023	0.0008	0.0107	0.0218
SUMATERA BARAT	SAWAHLUNTO SIJUNJUNG	130300	0.0062	0.0062	0.0008	0.0132	0.0042	0.0023	0.0019	0.0084	0.0216
JAWA BARAT	KARAWANG	321700	0.0062	0.0062	0.0014	0.0138	0.0016	0.0043	0.0019	0.0078	0.0216
KALIMANTAN BARAT	SAMBAS	610100	0.0062	0.0062	0.0008	0.0132	0.0042	0.0023	0.0019	0.0084	0.0216
SULAWESI SELATAN	BARRU	731000	0.003	0.003	0.0051	0.0111	0.0076	0.001	0.0019	0.0105	0.0216
PAPUA	MIMIKA	820500	0.0062	0.0016	0.0051	0.0129	0.0076	0.0006	0.0004	0.0086	0.0215
SUMATERA BARAT	PASAMAN	130800	0.003	0.0062	0.0051	0.0143	0.0042	0.001	0.0019	0.0071	0.0214
JAWA TIMUR	BLITAR	350500	0.003	0.0062	0.0051	0.0143	0.0042	0.001	0.0019	0.0071	0.0214
J A M B I	BATANGHARI	150400	0.0062	0.0016	0.0051	0.0129	0.0042	0.0023	0.0019	0.0084	0.0213
SUMATERA SELATAN	LAHAT	160400	0.0062	0.0016	0.0051	0.0129	0.0042	0.0023	0.0019	0.0084	0.0213
SULAWESI TENGAH	POSO	720200	0.0062	0.0016	0.0051	0.0129	0.0042	0.0023	0.0019	0.0084	0.0213
BALI	BULELENG	510800	0.0062	0.0062	0.0014	0.0138	0.0016	0.001	0.0048	0.0074	0.0212
JAWA TIMUR	BANYUWANGI	351000	0.003	0.0062	0.0014	0.0106	0.0076	0.001	0.0019	0.0105	0.0211
DIY	BANTUL	340200	0.003	0.0016	0.0079	0.0125	0.0042	0.0023	0.0019	0.0084	0.0209
JAWA TENGAH	SUKOHARJO	331100	0.0062	0.0016	0.0051	0.0129	0.0016	0.0043	0.0019	0.0078	0.0207
JAWA BARAT	KUNINGAN	321000	0.003	0.003	0.0051	0.0111	0.0042	0.001	0.0043	0.0095	0.0206
SULAWESI SELATAN	SINJAI	730700	0.003	0.003	0.0051	0.0111	0.0076	0.001	0.0008	0.0094	0.0205
SULAWESI SELATAN	LUWU	731700	0.003	0.0016	0.0051	0.0097	0.0076	0.0023	0.0008	0.0107	0.0204
LAMPUNG	LAMPUNG UTARA	180300	0.003	0.0016	0.0051	0.0097	0.0076	0.001	0.0019	0.0105	0.0202
SULAWESI SELATAN	BANTAENG	730300	0.003	0.0062	0.0014	0.0106	0.0076	0.001	0.0008	0.0094	0.02
JAWA TENGAH	MAGELANG	330800	0.003	0.003	0.0051	0.0111	0.0042	0.0023	0.0019	0.0084	0.0195
JAWA BARAT	TASIKMALAYA	320800	0.003	0.003	0.0051	0.0111	0.0016	0.0023	0.0043	0.0082	0.0193
BENGKULU	BENGKULU SELATAN	170100	0.0016	0.003	0.0051	0.0097	0.0042	0.001	0.0043	0.0095	0.0192
R I A U	KAMPAR	140400	0.003	0.0016	0.0051	0.0097	0.0076	0.001	0.0008	0.0094	0.0191
BALI	KARANG ASEM	510700	0.0062	0.003	0.0008	0.01	0.0042	0.0006	0.0043	0.0091	0.0191
NUSA TENGGARA TIMUR	TIMOR TENGAH SELATAN	530400	0.0016	0.0062	0.0008	0.0086	0.0076	0.001	0.0019	0.0105	0.0191
NUSA TENGGARA TIMUR	TIMOR TENGAH UTARA	530500	0.0016	0.0062	0.0008	0.0086	0.0076	0.001	0.0019	0.0105	0.0191
SUMATERA SELATAN	OGAN KOMERING ILIR	160200	0.003	0.0062	0.0014	0.0106	0.0042	0.0023	0.0019	0.0084	0.019
JAWA BARAT	SUKABUMI	320400	0.003	0.0062	0.0014	0.0106	0.0042	0.0023	0.0019	0.0084	0.019
SULAWESI SELATAN	TAKALAR	730500	0.003	0.0062	0.0014	0.0106	0.0042	0.0023	0.0019	0.0084	0.019
JAWA TENGAH	PEKALONGAN	332600	0.0062	0.003	0.0014	0.0106	0.0016	0.0043	0.0019	0.0078	0.0184
JAWA BARAT	BOGOR	320300	0.003	0.0016	0.0051	0.0097	0.0009	0.0069	0.0008	0.0086	0.0183
SUMATERA SELATAN	MUSI RAWAS	160500	0.0062	0.0016	0.0014	0.0092	0.0076	0.001	0.0004	0.009	0.0182
JAWA BARAT	CIANJUR	320500	0.003	0.003	0.0051	0.0111	0.0042	0.001	0.0019	0.0071	0.0182
JAWA BARAT	SUMEDANG	321300	0.003	0.0016	0.0051	0.0097	0.0042	0.0023	0.0019	0.0084	0.0181
JAWA TENGAH	BOYOLALI	330900	0.003	0.0016	0.0051	0.0097	0.0042	0.0023	0.0019	0.0084	0.0181
JAWA TIMUR	MAGETAN	352000	0.003	0.0016	0.0051	0.0097	0.0042	0.0023	0.0019	0.0084	0.0181
JAWA TIMUR	JOMBANG	351700	0.003	0.0016	0.0051	0.0097	0.0042	0.0023	0.0019	0.0084	0.0181
NUSA TENGGARA TIMUR	ENDE	531000	0.0016	0.0062	0.0008	0.0086	0.0042	0.001	0.0043	0.0095	0.0181
SULAWESI SELATAN	JENEPONTO	730400	0.0016	0.0062	0.0008	0.0086	0.0076	0.001	0.0008	0.0094	0.018
NUSA TENGGARA TIMUR	MANGGARAI	531200	0.0016	0.0062	0.0008	0.0086	0.0076	0.001	0.0008	0.0094	0.018
JAWA TIMUR	LAMONGAN	352400	0.003	0.003	0.0014	0.0074	0.0076	0.001	0.0019	0.0105	0.0179
BANTEN	SERANG	322000	0.0062	0.0016	0.0014	0.0092	0.0009	0.0069	0.0008	0.0086	0.0178
LAMPUNG	WAY KANAN	180300	0.0016	0.0016	0.0051	0.0083	0.0076	0.001	0.0008	0.0094	0.0177
JAWA BARAT	SUBANG	321500	0.0062	0.003	0.0014	0.0106	0.0042	0.001	0.0019	0.0071	0.0177
SULAWESI SELATAN	SELAYAR	730100	0.003	0.0062	0.0014	0.0106	0.0042	0.001	0.0019	0.0071	0.0177
JAWA TENGAH	PEMALANG	332700	0.0016	0.0062	0.0014	0.0092	0.0042	0.0023	0.0019	0.0084	0.0176
JAWA TENGAH	KLATEN	331000	0.003	0.0016	0.0051	0.0097	0.0016	0.0043	0.0019	0.0078	0.0175
BANTEN	LEBAK	320200	0.003	0.0062	0.0008	0.01	0.0042	0.001	0.0019	0.0071	0.0171
JAWA TIMUR	BANGKALAN	352600	0.003	0.0062	0.0008	0.01	0.0042	0.001	0.0019	0.0071	0.0171
JAWA TIMUR	JEMBER	350900	0.003	0.0062	0.0008	0.01	0.0042	0.001	0.0019	0.0071	0.0171
SULAWESI SELATAN	BONE	731100	0.003	0.003	0.0014	0.0074	0.0076	0.001	0.0008	0.0094	0.0168
KALIMANTAN SELATAN	HULU SUNGAI TENGAH	630700	0.003	0.0016	0.0051	0.0097	0.0042	0.001	0.0019	0.0071	0.0168
JAWA TENGAH	BANYUMAS	330200	0.0016	0.0016	0.0051	0.0083	0.0042	0.0023	0.0019	0.0084	0.0167
GORONTALO	GORONTALO	710100	0.0016	0.0016	0.0051	0.0083	0.0042	0.0023	0.0019	0.0084	0.0167
PAPUA	FAKFAK	820500	0.0016	0.0016	0.0051	0.0083	0.0042	0.0023	0.0019	0.0084	0.0167
JAWA TIMUR	BONDOWOSO	351100	0.0016	0.003	0.0008	0.0054	0.0076	0.001	0.0019	0.0105	0.0159
JAWA TIMUR	PASURUAN	351400	0.003	0.0016	0.0008	0.0054	0.0042	0.0043	0.0019	0.0104	0.0158
SULAWESI TENGGARA	BUTON	740100	0.003	0.003	0.0014	0.0074	0.0042	0.0023	0.0019	0.0084	0.0158
NUSA TENGGARA TIMUR	BELU	530600	0.0016	0.0062	0.0008	0.0086	0.0042	0.001	0.0019	0.0071	0.0157
JAWA TENGAH	KEBUMEN	330500	0.0016	0.0016	0.0051	0.0083	0.0042	0.001	0.0019	0.0071	0.0154
NUSA TENGGARA BARAT	LOMBOK BARAT	520101	0.003	0.0016	0.0008	0.0054	0.0042	0.001	0.0043	0.0095	0.0149
NUSA TENGGARA TIMUR	SUMBA BARAT	530100	0.0016	0.003	0.0008	0.0054	0.0076	0.001	0.0008	0.0094	0.0148
JAWA BARAT	CIREBON	321100	0.003	0.0016	0.0014	0.006	0.0042	0.0023	0.0019	0.0084	0.0144
NUSA TENGGARA TIMUR	FLORES TIMUR	530800	0.0016	0.0016	0.0014	0.0046	0.0042	0.001	0.0043	0.0095	0.0141
JAWA TIMUR	PAMEKASAN	352800	0.0016	0.0016	0.0008	0.004	0.0076	0.001	0.0008	0.0094	0.0134
JAWA BARAT	GARUT	320700	0.003	0.0016	0.0014	0.006	0.0042	0.001	0.0019	0.0071	0.0131
JAWA TIMUR	PONOROGO	350200	0.0016	0.0016	0.0014	0.0046	0.0042	0.0023	0.0019	0.0084	0.013
NUSA TENGGARA BARAT	BIMA	520600	0.003	0.0016	0.0008	0.0054	0.0042	0.001	0.0019	0.0071	0.0125
JAWA TENGAH	TEGAL	332800	0.0016	0.003	0.0014	0.006	0.0016	0.0023	0.0019	0.0058	0.0118
JAWA BARAT	KOTA CIREBON	327400	0.0247	0.0222	0.0086	0.0555	0.0009	0.0069	0.0043	0.0121	0.0676
SULAWESI UTARA	KOTA BITUNG	710302	0.0247	0.0222	0.0079	0.0548	0.0009	0.0069	0.0043	0.0121	0.0669
KALIMANTAN TIMUR	KOTA BALIKPAPAN	647100	0.0247	0.0222	0.0086	0.0555	0.0009	0.0069	0.0019	0.0097	0.0652
R I A U	KOTA BATAM	147200	0.0247	0.0222	0.0086	0.0555	0.0009	0.0069	0.0004	0.0082	0.0637
JAWA TIMUR	KOTA KEDIRI	357100	0.0247	0.0222	0.0079	0.0548	0.0009	0.0069	0.0004	0.0082	0.063
BANTEN	KOTA CILEGON	322000	0.0247	0.0222	0.0079	0.0548	0.0009	0.0069	0.0004	0.0082	0.063
SUMATERA SELATAN	KOTA PALEMBANG	167100	0.0247	0.0133	0.0079	0.0459	0.0009	0.0069	0.0043	0.0121	0.058
KALIMANTAN TIMUR	KOTA SAMARINDA	647200	0.0247	0.0133	0.0086	0.0466	0.0009	0.0043	0.0048	0.01	0.0566
SUMATERA UTARA	KOTA PEMATANG SIANTAR	127300	0.0247	0.0062	0.0086	0.0395	0.0009	0.0069	0.0043	0.0121	0.0516
SULAWESI TENGGARA	KOTA KENDARI	740302	0.0126	0.0222	0.0079	0.0427	0.0016	0.0023	0.0048	0.0087	0.0514
R I A U	KOTA PEKAN BARU	147100	0.0126	0.0222	0.0086	0.0434	0.0009	0.0023	0.0048	0.008	0.0514
JAWA TENGAH	KOTA SEMARANG	337400	0.0247	0.0062	0.0086	0.0395	0.0009	0.0043	0.0048	0.01	0.0495
BANTEN	KOTA TANGERANG	321902	0.0247	0.0062	0.0086	0.0395	0.0009	0.0069	0.0019	0.0097	0.0492
SUMATERA UTARA	KOTA SIBOLGA	127100	0.0126	0.0222	0.0079	0.0427	0.0016	0.0023	0.0019	0.0058	0.0485
JAWA TIMUR	KOTA MALANG	357300	0.0247	0.003	0.0079	0.0356	0.0009	0.0069	0.0048	0.0126	0.0482
SUMATERA BARAT	KOTA PADANG	137100	0.0247	0.0062	0.0086	0.0395	0.0009	0.0023	0.0048	0.008	0.0475
BALI	KOTA DENPASAR	510302	0.0247	0.0062	0.0086	0.0395	0.0009	0.0023	0.0048	0.008	0.0475
JAWA TIMUR	KOTA SURABAYA	357800	0.0247	0.0016	0.0086	0.0349	0.0009	0.0069	0.0043	0.0121	0.047
LAMPUNG	KOTA BANDAR LAMPUNG	187100	0.0247	0.003	0.0079	0.0356	0.0009	0.0043	0.0048	0.01	0.0456
JAWA BARAT	KOTA BANDUNG	327300	0.0247	0.0016	0.0086	0.0349	0.0009	0.0043	0.0048	0.01	0.0449
DKI JAKARTA	DKI JAKARTA	0	0.0247	0.0016	0.0086	0.0349	0.0009	0.0043	0.0048	0.01	0.0449
D.I. YOGYAKARTA	KOTA YOGYAKARTA	347100	0.0247	0.003	0.0086	0.0363	0.0009	0.0023	0.0048	0.008	0.0443
SUMATERA BARAT	KOTA SAWAH LUNTO	130302	0.0247	0.0016	0.0079	0.0342	0.0042	0.0023	0.0019	0.0084	0.0426
NUSA TENGGARA BARAT	KOTA MATARAM	520102	0.0247	0.0016	0.0051	0.0314	0.0009	0.001	0.0048	0.0067	0.0381
JAWA BARAT	KOTA BOGOR	327100	0.0062	0.0133	0.0079	0.0274	0.0009	0.0043	0.0048	0.01	0.0374
GORONTALO	KOTA GORONTALO	717100	0.003	0.0222	0.0051	0.0303	0	0.001	0.0048	0.0058	0.0361
BANGKA BELITUNG	KOTA PANGKAL PINANG	167200	0.0062	0.0133	0.0079	0.0274	0.0016	0.0023	0.0048	0.0087	0.0361
R I A U	KOTA DUMAI	140500	0.0062	0.0133	0.0079	0.0274	0.0009	0.0023	0.0048	0.008	0.0354
JAWA TENGAH	KOTA SURAKARTA	337200	0.0126	0.0016	0.0086	0.0228	0.0009	0.0069	0.0048	0.0126	0.0354
JAWA BARAT	KOTA BEKASI	321802	0.0126	0.0016	0.0086	0.0228	0.0009	0.0069	0.0019	0.0097	0.0325
JAWA TIMUR	KOTA MADIUN	357700	0.0062	0.0062	0.0079	0.0203	0.0009	0.0069	0.0043	0.0121	0.0324
SUMATERA UTARA	KOTA BINJAI	127600	0.0062	0.0062	0.0079	0.0203	0.0009	0.0069	0.0043	0.0121	0.0324
SUMATERA UTARA	KOTA MEDAN	127500	0.0126	0.003	0.0086	0.0242	0.0009	0.0023	0.0048	0.008	0.0322
SUMATERA UTARA	KOTA TEBING TINGGI	127400	0.0126	0.0016	0.0079	0.0221	0.0009	0.0043	0.0048	0.01	0.0321
SUMATERA UTARA	KOTA TANJUNG BALAI	127200	0.0126	0.0062	0.0051	0.0239	0.0016	0.0043	0.0019	0.0078	0.0317
JAWA TIMUR	KOTA MOJOKERTO	357600	0.0062	0.0062	0.0086	0.021	0.0009	0.0023	0.0048	0.008	0.029
SULAWESI UTARA	KOTA MANADO	717200	0.0062	0.0062	0.0086	0.021	0.0009	0.0023	0.0048	0.008	0.029
JAWA TIMUR	KOTA PROBOLINGGO	357400	0.0126	0.003	0.0051	0.0207	0.0009	0.0023	0.0048	0.008	0.0287
SULAWESI SELATAN	KOTA PARE-PARE	737200	0.0062	0.0062	0.0086	0.021	0.0009	0.001	0.0048	0.0067	0.0277
BENGKULU	KOTA BENGKULU	177100	0.0062	0.0062	0.0086	0.021	0.0009	0.001	0.0048	0.0067	0.0277
JAWA TENGAH	KOTA TEGAL	337600	0.003	0.0062	0.0079	0.0171	0.0009	0.0023	0.0043	0.0075	0.0246
JAWA TENGAH	KOTA PEKALONGAN	337500	0.003	0.003	0.0051	0.0111	0.0042	0.0043	0.0043	0.0128	0.0239
JAWA BARAT	KOTA SUKABUMI	327200	0.0062	0.0016	0.0079	0.0157	0.0009	0.001	0.0048	0.0067	0.0224
NUSA TENGGARA TIMUR	KOTA KUPANG	530302	0.003	0.0016	0.0079	0.0125	0.0009	0.0023	0.0048	0.008	0.0205

## Sheet: labprod_03
prov_kppod_03	kab_kppod_03	kabID97	prodage_pop_03	jhighw_totw_03	seek_labforce_03	subtot_manpav_03	minwage_cpi_03	salary_cpi_03	subtot_labcost_03	Mfvaladd_Mfwork_03	tot_labprod_03
SUMATERA BARAT	PESISIR SELATAN	130100	0.0015	0.0027	0.0113	0.0155	0.006	0.0088	0.0148	0.0273	0.0576
SULAWESI SELATAN	PANGKAJENE & KEPULAUAN	730900	0.0019	0.0027	0.0113	0.0159	0.006	0.0014	0.0074	0.0273	0.0506
JAWA BARAT	BEKASI	321801	0.0019	0.0027	0.0068	0.0114	0.0015	0.0088	0.0103	0.0273	0.049
SULAWESI TENGGARA	KOLAKA	740400	0.0015	0.0027	0.0015	0.0057	0.006	0.0088	0.0148	0.0273	0.0478
KALIMANTAN BARAT	SANGGAU	610300	0.0019	0.0004	0.0031	0.0054	0.006	0.0088	0.0148	0.0273	0.0475
SUMATERA BARAT	SOLOK	130200	0.0006	0.0027	0.0015	0.0048	0.006	0.0088	0.0148	0.0273	0.0469
KALIMANTAN TIMUR	BULUNGAN	640400	0.0025	0.0027	0.0031	0.0083	0.0015	0.0088	0.0103	0.0273	0.0459
SUMATERA UTARA	LABUHAN BATU	120500	0.0006	0.0027	0.0031	0.0064	0.0015	0.0088	0.0103	0.0273	0.044
BANGKA BELITUNG	BANGKA	160700	0.0006	0.0004	0.0008	0.0018	0.006	0.0088	0.0148	0.0273	0.0439
SULAWESI SELATAN	MAROS	730800	0.0019	0.0027	0.0031	0.0077	0.006	0.002	0.008	0.0273	0.043
SUMATERA SELATAN	LAHAT	160400	0.0006	0.0009	0.0031	0.0046	0.006	0.0021	0.0081	0.0273	0.04
JAWA TENGAH	CILACAP	330100	0.0019	0.0009	0.0031	0.0059	0.0029	0.002	0.0049	0.0273	0.0381
SUMATERA UTARA	ASAHAN	120600	0.0006	0.0027	0.0031	0.0064	0.0015	0.002	0.0035	0.0273	0.0372
SULAWESI SELATAN	BARRU	731000	0.0019	0.0027	0.0113	0.0159	0.006	0.0088	0.0148	0.0028	0.0335
SULAWESI SELATAN	GOWA	730600	0.0019	0.0027	0.0113	0.0159	0.006	0.0088	0.0148	0.0028	0.0335
J A M B I	BATANGHARI	150400	0.0019	0.0027	0.0031	0.0077	0.0029	0.0088	0.0117	0.014	0.0334
PAPUA	SORONG	820600	0.0006	0.0009	0.0015	0.003	0.0015	0.0014	0.0029	0.0273	0.0332
BANTEN	TANGERANG	321901	0.0019	0.0027	0.0113	0.0159	0.0015	0.0088	0.0103	0.0066	0.0328
JAWA BARAT	BANDUNG	320600	0.0019	0.0027	0.0113	0.0159	0.0015	0.0088	0.0103	0.0066	0.0328
SUMATERA UTARA	DELI SERDANG	121000	0.0019	0.0025	0.0113	0.0157	0.0015	0.0088	0.0103	0.0066	0.0326
JAMBI	TANJUNG JABUNG TIMUR	150500	0.0019	0.0009	0.0113	0.0141	0.0029	0.0088	0.0117	0.0066	0.0324
JAWA BARAT	KARAWANG	321700	0.0025	0.0009	0.0113	0.0147	0.0015	0.0088	0.0103	0.0066	0.0316
SULAWESI SELATAN	BONE	731100	0.0019	0.0004	0.0068	0.0091	0.006	0.0088	0.0148	0.0066	0.0305
R I A U	BENGKALIS	140500	0.0034	0.0027	0.0068	0.0129	0.006	0.0088	0.0148	0.0028	0.0305
BANGKA BELITUNG	BELITUNG	160700	0.0025	0.0027	0.0031	0.0083	0.006	0.0021	0.0081	0.014	0.0304
SULAWESI SELATAN	TAKALAR	730500	0.0015	0.0027	0.0031	0.0073	0.006	0.0021	0.0081	0.014	0.0294
KALIMANTAN BARAT	PONTIANAK	610200	0.0019	0.0027	0.0031	0.0077	0.006	0.0088	0.0148	0.0066	0.0291
SUMATERA UTARA	LANGKAT	121100	0.0019	0.0025	0.0113	0.0157	0.0015	0.0088	0.0103	0.0028	0.0288
JAWA BARAT	BOGOR	320300	0.0015	0.0027	0.0113	0.0155	0.0015	0.0088	0.0103	0.0028	0.0286
JAWA BARAT	CIREBON	321100	0.0019	0.0009	0.0113	0.0141	0.0029	0.0088	0.0117	0.0028	0.0286
KALIMANTAN TENGAH	KAPUAS	620300	0.0019	0.0027	0.0015	0.0061	0.006	0.0088	0.0148	0.0066	0.0275
KALIMANTAN TENGAH	BARITO SELATAN	620400	0.0019	0.0025	0.0015	0.0059	0.006	0.0088	0.0148	0.0066	0.0273
BALI	BADUNG	510301	0.0034	0.0032	0.0031	0.0097	0.006	0.0088	0.0148	0.0028	0.0273
KALIMANTAN BARAT	KETAPANG	610400	0.0019	0.0009	0.0068	0.0096	0.006	0.0088	0.0148	0.0028	0.0272
BANTEN	LEBAK	320200	0.0015	0.0004	0.0068	0.0087	0.0022	0.002	0.0042	0.014	0.0269
JAWA BARAT	INDRAMAYU	321400	0.0019	0.0004	0.0031	0.0054	0.006	0.0088	0.0148	0.0066	0.0268
SUMATERA UTARA	SIMALUNGUN	120700	0.0006	0.0025	0.0068	0.0099	0.0015	0.0088	0.0103	0.0066	0.0268
JAWA TIMUR	SIDOARJO	351500	0.0034	0.0032	0.0031	0.0097	0.0015	0.0088	0.0103	0.0066	0.0266
KALIMANTAN SELATAN	HULU SUNGAI TENGAH	630700	0.0019	0.0027	0.0113	0.0159	0.006	0.002	0.008	0.0019	0.0258
RIAU	KUANTAN SENGGIGI	140100	0.0019	0.0027	0.0031	0.0077	0.006	0.0088	0.0148	0.0028	0.0253
SULAWESI SELATAN	TANA TORAJA	731800	0.0019	0.0027	0.0031	0.0077	0.006	0.0088	0.0148	0.0028	0.0253
BANTEN	SERANG	322000	0.0006	0.0009	0.0068	0.0083	0.0015	0.0088	0.0103	0.0066	0.0252
JAWA BARAT	SUMEDANG	321300	0.0034	0.0027	0.0068	0.0129	0.0015	0.0088	0.0103	0.0019	0.0251
KALIMANTAN SELATAN	TANAH LAUT	630100	0.0025	0.0009	0.0031	0.0065	0.006	0.0088	0.0148	0.0028	0.0241
BALI	BULELENG	510800	0.0019	0.0027	0.0015	0.0061	0.006	0.0088	0.0148	0.0028	0.0237
BALI	TABANAN	510200	0.0034	0.0027	0.0008	0.0069	0.006	0.0088	0.0148	0.0019	0.0236
BALI	JEMBRANA	510100	0.0025	0.0027	0.0015	0.0067	0.006	0.0088	0.0148	0.0019	0.0234
SUMATERA BARAT	SAWAHLUNTO SIJUNJUNG	130300	0.0015	0.0027	0.0015	0.0057	0.006	0.0088	0.0148	0.0028	0.0233
SUMATERA SELATAN	MUSI RAWAS	160500	0.0015	0.0009	0.0031	0.0055	0.006	0.0088	0.0148	0.0028	0.0231
SULAWESI TENGGARA	BUTON	740100	0.0006	0.0027	0.0031	0.0064	0.006	0.0088	0.0148	0.0019	0.0231
SULAWESI TENGAH	POSO	720200	0.0025	0.0027	0.0031	0.0083	0.006	0.002	0.008	0.0066	0.0229
LAMPUNG	WAY KANAN	180300	0.0019	0.0027	0.0008	0.0054	0.0018	0.0088	0.0106	0.0066	0.0226
JAWA TIMUR	MAGETAN	352000	0.0034	0.0027	0.0031	0.0092	0.0018	0.0088	0.0106	0.0028	0.0226
KALIMANTAN SELATAN	HULU SUNGAI SELATAN	630600	0.0019	0.0009	0.0031	0.0059	0.006	0.0088	0.0148	0.0019	0.0226
RIAU	ROKAN HULU	140400	0.0025	0.0009	0.0015	0.0049	0.006	0.0088	0.0148	0.0028	0.0225
SUMATERA SELATAN	MUARA ENIM	160300	0.0006	0.0009	0.0031	0.0046	0.006	0.0088	0.0148	0.0028	0.0222
KALIMANTAN BARAT	SAMBAS	610100	0.0006	0.0009	0.0031	0.0046	0.006	0.0088	0.0148	0.0028	0.0222
SULAWESI UTARA	MINAHASA	710300	0.0025	0.0025	0.0031	0.0081	0.0022	0.0088	0.011	0.0028	0.0219
SULAWESI SELATAN	LUWU UTARA	731700	0.0015	0.0027	0.0031	0.0073	0.006	0.002	0.008	0.0066	0.0219
BALI	BANGLI	510600	0.0034	0.0009	0.0008	0.0051	0.006	0.0088	0.0148	0.0019	0.0218
SULAWESI SELATAN	PINRANG	731500	0.0019	0.0027	0.0031	0.0077	0.006	0.0014	0.0074	0.0066	0.0217
RIAU	PELALAWAN	140400	0.0006	0.0009	0.0031	0.0046	0.006	0.0088	0.0148	0.0019	0.0213
LAMPUNG	LAMPUNG UTARA	180300	0.0019	0.0027	0.0031	0.0077	0.0018	0.0088	0.0106	0.0028	0.0211
KALIMANTAN TIMUR	KUTAI KERTANEGARA	640200	0.0019	0.0027	0.0068	0.0114	0.0015	0.0014	0.0029	0.0066	0.0209
KALIMANTAN BARAT	KAPUAS HULU	610600	0.0019	0.0027	0.0015	0.0061	0.006	0.002	0.008	0.0066	0.0207
JAWA TIMUR	MOJOKERTO	351600	0.0025	0.0027	0.0015	0.0067	0.0022	0.0088	0.011	0.0028	0.0205
JAWA TENGAH	KLATEN	331000	0.0025	0.0027	0.0015	0.0067	0.0029	0.0088	0.0117	0.0019	0.0203
SUMATERA UTARA	TAPANULI UTARA	120400	0.0015	0.0025	0.0031	0.0071	0.0015	0.0088	0.0103	0.0028	0.0202
GORONTALO	GORONTALO	710100	0.0019	0.0004	0.0068	0.0091	0.006	0.0021	0.0081	0.0028	0.02
BALI	KARANG ASEM	510700	0.0019	0.0004	0.0008	0.0031	0.006	0.0088	0.0148	0.0019	0.0198
JAMBI	TEBO	150200	0.0019	0.0027	0.0015	0.0061	0.0029	0.0088	0.0117	0.0019	0.0197
SULAWESI UTARA	SANGIHE	710400	0.0019	0.0009	0.0031	0.0059	0.0022	0.0088	0.011	0.0028	0.0197
PAPUA	MIMIKA	820500	0.0006	0.0025	0.0113	0.0144	0.0015	0.0014	0.0029	0.0019	0.0192
LAMPUNG	LAMPUNG TIMUR	180200	0.0019	0.0027	0.0015	0.0061	0.0018	0.0088	0.0106	0.0019	0.0186
SULAWESI TENGAH	DONGGALA	720300	0.0019	0.0027	0.0031	0.0077	0.006	0.002	0.008	0.0028	0.0185
JAWA TIMUR	GRESIK	352500	0.0025	0.0027	0.0031	0.0083	0.0015	0.002	0.0035	0.0066	0.0184
JAWA BARAT	SUBANG	321500	0.0034	0.0009	0.0031	0.0074	0.006	0.0021	0.0081	0.0028	0.0183
JAWA TENGAH	PEKALONGAN	332600	0.0019	0.0004	0.0015	0.0038	0.0029	0.0088	0.0117	0.0028	0.0183
SUMATERA BARAT	PASAMAN	130800	0.0015	0.0027	0.0031	0.0073	0.006	0.0021	0.0081	0.0028	0.0182
JAWA TENGAH	KUDUS	331900	0.0025	0.0027	0.0015	0.0067	0.0029	0.002	0.0049	0.0066	0.0182
KALIMANTAN TENGAH	BARITO UTARA	620500	0.0006	0.0027	0.0008	0.0041	0.006	0.0014	0.0074	0.0066	0.0181
SULAWESI SELATAN	ENREKANG	731600	0.0019	0.0027	0.0031	0.0077	0.006	0.0014	0.0074	0.0028	0.0179
JAWA BARAT	PURWAKARTA	321600	0.0019	0.0027	0.0031	0.0077	0.0015	0.002	0.0035	0.0066	0.0178
SUMATERA UTARA	TANAH KARO	120900	0.0006	0.0032	0.0008	0.0046	0.0015	0.0088	0.0103	0.0028	0.0177
JAWA TIMUR	JOMBANG	351700	0.0019	0.0027	0.0031	0.0077	0.006	0.002	0.008	0.0019	0.0176
KALIMANTAN TIMUR	NUNUKAN	640400	0.0019	0.0027	0.0008	0.0054	0.0015	0.0088	0.0103	0.0019	0.0176
SULAWESI TENGAH	TOLI TOLI	720400	0.0006	0.0027	0.0031	0.0064	0.006	0.002	0.008	0.0028	0.0172
KALIMANTAN TIMUR	BERAU	640300	0.0019	0.0027	0.0031	0.0077	0.0015	0.0014	0.0029	0.0066	0.0172
SULAWESI SELATAN	LUWU	731700	0.0006	0.0027	0.0031	0.0064	0.006	0.002	0.008	0.0028	0.0172
SULAWESI SELATAN	SELAYAR	730100	0.0025	0.0004	0.0031	0.006	0.006	0.0021	0.0081	0.0028	0.0169
JAWA BARAT	SUKABUMI	320400	0.0019	0.0004	0.0068	0.0091	0.0029	0.002	0.0049	0.0028	0.0168
BALI	GIANYAR	510400	0.0034	0.0027	0.0008	0.0069	0.006	0.002	0.008	0.0019	0.0168
KALIMANTAN SELATAN	TABALONG	630900	0.0025	0.0027	0.0008	0.006	0.006	0.002	0.008	0.0028	0.0168
SULAWESI SELATAN	BANTAENG	730300	0.0019	0.0009	0.0031	0.0059	0.006	0.002	0.008	0.0028	0.0167
SULAWESI TENGAH	BANGGAI	720100	0.0015	0.0027	0.0015	0.0057	0.006	0.002	0.008	0.0028	0.0165
JAWA TENGAH	TEGAL	332800	0.0015	0.0004	0.0068	0.0087	0.0029	0.002	0.0049	0.0028	0.0164
SUMATERA SELATAN	OGAN KOMERING ILIR	160200	0.0019	0.0004	0.0031	0.0054	0.006	0.002	0.008	0.0028	0.0162
JAWA TIMUR	KEDIRI	350600	0.0019	0.0027	0.0015	0.0061	0.006	0.002	0.008	0.0019	0.016
NUSA TENGGARA TIMUR	BELU	530600	0.0015	0.0004	0.0015	0.0034	0.0018	0.0088	0.0106	0.0019	0.0159
JAWA TENGAH	KENDAL	332400	0.0025	0.0009	0.0008	0.0042	0.0029	0.002	0.0049	0.0066	0.0157
JAWA TIMUR	PASURUAN	351400	0.0034	0.0009	0.0015	0.0058	0.006	0.002	0.008	0.0019	0.0157
NUSA TENGGARA TIMUR	ENDE	531000	0.0006	0.0009	0.0015	0.003	0.0018	0.0088	0.0106	0.0019	0.0155
PAPUA	JAYAWIJAYA	820200	0.0019	0.0004	0.0008	0.0031	0.0015	0.0088	0.0103	0.0019	0.0153
JAWA BARAT	GARUT	320700	0.0015	0.0004	0.0068	0.0087	0.0018	0.002	0.0038	0.0028	0.0153
R I A U	KAMPAR	140400	0.0019	0.0025	0.0015	0.0059	0.006	0.0014	0.0074	0.0019	0.0152
JAWA TENGAH	BANYUMAS	330200	0.0025	0.0027	0.0031	0.0083	0.0029	0.002	0.0049	0.0019	0.0151
JAWA BARAT	CIANJUR	320500	0.0019	0.0004	0.0068	0.0091	0.0018	0.0021	0.0039	0.0019	0.0149
JAWA BARAT	KUNINGAN	321000	0.0019	0.0004	0.0068	0.0091	0.0018	0.002	0.0038	0.0019	0.0148
NUSA TENGGARA TIMUR	FLORES TIMUR	530800	0.0006	0.0009	0.0008	0.0023	0.0018	0.0088	0.0106	0.0019	0.0148
JAWA TENGAH	SUKOHARJO	331100	0.0034	0.0027	0.0008	0.0069	0.0029	0.002	0.0049	0.0028	0.0146
SUMATERA SELATAN	MUSI BANYUASIN	160600	0.0019	0.0009	0.0008	0.0036	0.006	0.002	0.008	0.0028	0.0144
D.I.YOGYAKRTA	BANTUL	340200	0.0034	0.0027	0.0015	0.0076	0.0029	0.002	0.0049	0.0019	0.0144
KALIMANTAN SELATAN	TAPIN	630500	0.0025	0.0004	0.0015	0.0044	0.006	0.0021	0.0081	0.0019	0.0144
NUSA TENGGARA TIMUR	MANGGARAI	531200	0.0006	0.0004	0.0008	0.0018	0.0018	0.0088	0.0106	0.0019	0.0143
JAWA TIMUR	PAMEKASAN	352800	0.0019	0.0009	0.0015	0.0043	0.006	0.002	0.008	0.0019	0.0142
SULAWESI TENGAH	MOROWALI	720200	0.0015	0.0004	0.0015	0.0034	0.006	0.002	0.008	0.0028	0.0142
JAWA TIMUR	TULUNGAGUNG	350400	0.0034	0.0027	0.0015	0.0076	0.0018	0.002	0.0038	0.0028	0.0142
R I A U	INDRAGIRI HILIR	140200	0.0015	0.0009	0.0015	0.0039	0.006	0.0014	0.0074	0.0028	0.0141
NUSA TENGGARA BARAT	BIMA	520600	0.0015	0.0027	0.0031	0.0073	0.0029	0.002	0.0049	0.0019	0.0141
J A M B I	KERINCI	150100	0.0019	0.0027	0.0015	0.0061	0.0029	0.002	0.0049	0.0028	0.0138
KALIMANTAN SELATAN	HULU SUNGAI UTARA	630800	0.0019	0.0004	0.0015	0.0038	0.006	0.0021	0.0081	0.0019	0.0138
SULAWESI SELATAN	SINJAI	730700	0.0019	0.0009	0.0008	0.0036	0.006	0.002	0.008	0.0019	0.0135
JAWA TENGAH	MAGELANG	330800	0.0025	0.0027	0.0015	0.0067	0.0029	0.002	0.0049	0.0019	0.0135
JAWA TIMUR	LAMONGAN	352400	0.0034	0.0027	0.0015	0.0076	0.0018	0.002	0.0038	0.0019	0.0133
NUSA TENGGARA BARAT	DOMPU	520500	0.0006	0.0027	0.0031	0.0064	0.0029	0.0021	0.005	0.0019	0.0133
JAWA TIMUR	PONOROGO	350200	0.0034	0.0009	0.0031	0.0074	0.0018	0.0021	0.0039	0.0019	0.0132
SULAWESI SELATAN	MAJENE	732000	0.0006	0.0009	0.0008	0.0023	0.006	0.0021	0.0081	0.0028	0.0132
SULAWESI SELATAN	JENEPONTO	730400	0.0006	0.0009	0.0015	0.003	0.006	0.002	0.008	0.0019	0.0129
JAWA TENGAH	BOYOLALI	330900	0.0019	0.0027	0.0015	0.0061	0.0029	0.002	0.0049	0.0019	0.0129
J A M B I	BUNGO	150200	0.0015	0.0027	0.0008	0.005	0.0029	0.002	0.0049	0.0028	0.0127
LAMPUNG	LAMPUNG BARAT	180302	0.0019	0.0027	0.0015	0.0061	0.0018	0.002	0.0038	0.0028	0.0127
JAWA TENGAH	KARANG ANYAR	331300	0.0025	0.0009	0.0015	0.0049	0.0029	0.002	0.0049	0.0028	0.0126
JAWA TIMUR	JEMBER	350900	0.0034	0.0009	0.0015	0.0058	0.0029	0.002	0.0049	0.0019	0.0126
LAMPUNG	LAMPUNG SELATAN	180101	0.0019	0.0009	0.0031	0.0059	0.0018	0.002	0.0038	0.0028	0.0125
NUSA TENGGARA BARAT	LOMBOK TIMUR	520300	0.0015	0.0009	0.0031	0.0055	0.0029	0.0021	0.005	0.0019	0.0124
JAWA BARAT	TASIKMALAYA	320800	0.0025	0.0009	0.0031	0.0065	0.0018	0.002	0.0038	0.0019	0.0122
JAWA TENGAH	JEPARA	332000	0.0019	0.0027	0.0008	0.0054	0.0029	0.002	0.0049	0.0019	0.0122
JAWA TIMUR	BANGKALAN	352600	0.0019	0.0004	0.0031	0.0054	0.0029	0.002	0.0049	0.0019	0.0122
JAWA TENGAH	PEMALANG	332700	0.0019	0.0009	0.0015	0.0043	0.0029	0.002	0.0049	0.0028	0.012
D.I. YOGYAKARTA	GUNUNG KIDUL	340300	0.0025	0.0009	0.0008	0.0042	0.0029	0.002	0.0049	0.0028	0.0119
PAPUA	FAKFAK	820500	0.0015	0.0032	0.0015	0.0062	0.0015	0.0014	0.0029	0.0028	0.0119
JAWA BARAT	CIAMIS	320900	0.0025	0.0004	0.0031	0.006	0.0018	0.0021	0.0039	0.0019	0.0118
BENGKULU	BENGKULU SELATAN	170100	0.0019	0.0025	0.0015	0.0059	0.0018	0.002	0.0038	0.0019	0.0116
JAWA TIMUR	BANYUWANGI	351000	0.0034	0.0009	0.0015	0.0058	0.0018	0.0021	0.0039	0.0019	0.0116
KALIMANTAN TIMUR	PASIR	640100	0.0006	0.0027	0.0015	0.0048	0.0015	0.002	0.0035	0.0028	0.0111
KALIMANTAN TIMUR	KUTAI TIMUR	640200	0.0019	0.0032	0.0008	0.0059	0.0015	0.0014	0.0029	0.0019	0.0107
JAWA TIMUR	BLITAR	350500	0.0019	0.0009	0.0015	0.0043	0.0018	0.0021	0.0039	0.0019	0.0101
JAWA TENGAH	KEBUMEN	330500	0.0019	0.0009	0.0015	0.0043	0.0018	0.002	0.0038	0.0019	0.01
NUSA TENGGARA BARAT	LOMBOK BARAT	520101	0.0015	0.0004	0.0008	0.0027	0.0029	0.002	0.0049	0.0019	0.0095
SUMATERA UTARA	DAIRI	120800	0.0006	0.0025	0.0008	0.0039	0.0015	0.0021	0.0036	0.0019	0.0094
NUSA TENGGARA TIMUR	TIMOR TENGAH SELATAN	530400	0.0019	0.0004	0.0008	0.0031	0.0018	0.0014	0.0032	0.0028	0.0091
JAWA TIMUR	BONDOWOSO	351100	0.0019	0.0004	0.0008	0.0031	0.0018	0.0021	0.0039	0.0019	0.0089
NUSA TENGGARA TIMUR	SUMBA BARAT	530100	0.0006	0.0004	0.0015	0.0025	0.0018	0.0021	0.0039	0.0019	0.0083
PAPUA	MANOKWARI	820700	0.0006	0.0009	0.0008	0.0023	0.0015	0.0014	0.0029	0.0028	0.008
NUSA TENGGARA TIMUR	TIMOR TENGAH UTARA	530500	0.0006	0.0004	0.0008	0.0018	0.0018	0.0021	0.0039	0.0019	0.0076
NUSA TENGGARA TIMUR	NGADA	531100	0.0006	0.0004	0.0008	0.0018	0.0018	0.002	0.0038	0.0019	0.0075
JAWA TIMUR	KOTA KEDIRI	357100	0.0034	0.0032	0.0068	0.0134	0.006	0.0088	0.0148	0.0273	0.0555
JAWA BARAT	KOTA CIREBON	327400	0.0019	0.0032	0.0113	0.0164	0.0029	0.0088	0.0117	0.0273	0.0554
SUMATERA SELATAN	KOTA PALEMBANG	167100	0.0025	0.0032	0.0113	0.017	0.006	0.0014	0.0074	0.0273	0.0517
KALIMANTAN TIMUR	KOTA BALIKPAPAN	647100	0.0025	0.0032	0.0113	0.017	0.0015	0.0014	0.0029	0.0273	0.0472
BANTEN	KOTA CILEGON	322000	0.0019	0.0025	0.0113	0.0157	0.0015	0.002	0.0035	0.0273	0.0465
R I A U	KOTA BATAM	147200	0.0025	0.0032	0.0015	0.0072	0.0015	0.0088	0.0103	0.0273	0.0448
LAMPUNG	KOTA BANDAR LAMPUNG	187100	0.0019	0.0032	0.0113	0.0164	0.0018	0.0088	0.0106	0.014	0.041
SUMATERA UTARA	KOTA TANJUNG BALAI	127200	0.0006	0.0032	0.0113	0.0151	0.0015	0.0088	0.0103	0.014	0.0394
SULAWESI TENGGARA	KOTA KENDARI	740302	0.0025	0.0032	0.0113	0.017	0.006	0.0088	0.0148	0.0028	0.0346
JAWA TIMUR	KOTA PROBOLINGGO	357400	0.0025	0.0027	0.0068	0.012	0.006	0.0021	0.0081	0.014	0.0341
JAWA TIMUR	KOTA SURABAYA	357800	0.0034	0.0032	0.0031	0.0097	0.0015	0.0088	0.0103	0.014	0.034
GORONTALO	KOTA GORONTALO	717100	0.0019	0.0025	0.0113	0.0157	0.006	0.0088	0.0148	0.0028	0.0333
SUMATERA UTARA	KOTA BINJAI	127600	0.0025	0.0025	0.0031	0.0081	0.0015	0.0088	0.0103	0.014	0.0324
SUMATERA BARAT	KOTA PADANG	137100	0.0025	0.0032	0.0113	0.017	0.006	0.002	0.008	0.0066	0.0316
JAWA TENGAH	KOTA SEMARANG	337400	0.0034	0.0032	0.0068	0.0134	0.006	0.0088	0.0148	0.0028	0.031
D.I. YOGYAKARTA	KOTA YOGYAKARTA	347100	0.0034	0.0032	0.0031	0.0097	0.0029	0.0088	0.0117	0.0066	0.028
SULAWESI UTARA	KOTA BITUNG	710302	0.0025	0.0032	0.0113	0.017	0.0022	0.0014	0.0036	0.0066	0.0272
JAWA BARAT	KOTA BANDUNG	327300	0.0025	0.0032	0.0113	0.017	0.0015	0.002	0.0035	0.0066	0.0271
JAWA BARAT	KOTA SUKABUMI	327200	0.0025	0.0032	0.0113	0.017	0.006	0.002	0.008	0.0019	0.0269
JAWA TIMUR	KOTA MADIUN	357700	0.0025	0.0032	0.0113	0.017	0.0018	0.0014	0.0032	0.0066	0.0268
SUMATERA BARAT	KOTA SAWAH LUNTO	130302	0.0019	0.0027	0.0113	0.0159	0.006	0.002	0.008	0.0028	0.0267
SUMATERA UTARA	KOTA MEDAN	127500	0.0019	0.0032	0.0113	0.0164	0.0015	0.002	0.0035	0.0066	0.0265
SULAWESI SELATAN	KOTA PARE-PARE	737200	0.0015	0.0032	0.0113	0.016	0.006	0.0014	0.0074	0.0028	0.0262
SUMATERA UTARA	KOTA TEBING TINGGI	127400	0.0019	0.0027	0.0113	0.0159	0.0015	0.002	0.0035	0.0066	0.026
NUSA TENGGARA BARAT	KOTA MATARAM	520102	0.0019	0.0025	0.0068	0.0112	0.0029	0.0088	0.0117	0.0028	0.0257
BENGKULU	KOTA BENGKULU	177100	0.0019	0.0032	0.0068	0.0119	0.0018	0.0088	0.0106	0.0028	0.0253
SUMATERA UTARA	KOTA PEMATANG SIANTAR	127300	0.0019	0.0032	0.0031	0.0082	0.0015	0.0088	0.0103	0.0066	0.0251
R I A U	KOTA DUMAI	140500	0.0019	0.0027	0.0031	0.0077	0.006	0.0088	0.0148	0.0019	0.0244
SULAWESI UTARA	KOTA MANADO	717200	0.0034	0.0032	0.0113	0.0179	0.0022	0.0014	0.0036	0.0028	0.0243
JAWA TIMUR	KOTA MOJOKERTO	357600	0.0034	0.0025	0.0113	0.0172	0.0022	0.002	0.0042	0.0019	0.0233
JAWA BARAT	KOTA BOGOR	327100	0.0025	0.0032	0.0113	0.017	0.0015	0.002	0.0035	0.0028	0.0233
DKI JAKARTA	DKI JAKARTA	0	0.0034	0.0032	0.0068	0.0134	0.0015	0.0014	0.0029	0.0066	0.0229
JAWA TENGAH	KOTA PEKALONGAN	337500	0.0019	0.0027	0.0031	0.0077	0.0029	0.0088	0.0117	0.0028	0.0222
R I A U	KOTA PEKAN BARU	147100	0.0019	0.0032	0.0068	0.0119	0.006	0.0014	0.0074	0.0028	0.0221
BANGKA BELITUNG	KOTA PANGKAL PINANG	167200	0.0025	0.0025	0.0031	0.0081	0.006	0.0014	0.0074	0.0066	0.0221
KALIMANTAN TIMUR	KOTA SAMARINDA	647200	0.0025	0.0032	0.0068	0.0125	0.0015	0.0014	0.0029	0.0066	0.022
BALI	KOTA DENPASAR	510302	0.0034	0.0032	0.0031	0.0097	0.006	0.0014	0.0074	0.0028	0.0199
JAWA TIMUR	KOTA MALANG	357300	0.0034	0.0032	0.0031	0.0097	0.0022	0.0014	0.0036	0.0066	0.0199
JAWA TENGAH	KOTA TEGAL	337600	0.0019	0.0027	0.0031	0.0077	0.0029	0.002	0.0049	0.0066	0.0192
BANTEN	KOTA TANGERANG	321902	0.0025	0.0032	0.0031	0.0088	0.0015	0.002	0.0035	0.0066	0.0189
JAWA BARAT	KOTA BEKASI	321802	0.0025	0.0032	0.0031	0.0088	0.0015	0.0014	0.0029	0.0066	0.0183
NUSA TENGGARA TIMUR	KOTA KUPANG	530302	0.0015	0.0032	0.0068	0.0115	0.0018	0.002	0.0038	0.0019	0.0172
SUMATERA UTARA	KOTA SIBOLGA	127100	0.0006	0.0027	0.0031	0.0064	0.0015	0.0014	0.0029	0.0066	0.0159
JAWA TENGAH	KOTA SURAKARTA	337200	0.0019	0.0025	0.0031	0.0075	0.0029	0.002	0.0049	0.0028	0.0152
