# Supplementary material for: Democratization, leader education and growth: firm-level evidence from Indonesia
Source: Springer Nature journal article supplement (doi:10.1007/s10887-022-09221-5), 2023-02-15
Supplement: MOESM2 [file kppod_2004.xlsx]

## Sheet: infra_04
prov_kppod_04	kab_kppod_04	kabID97	av_street_04	av_seaport_04	av_airport_04	av_elecserv_04	av_telserv_04	qu_street_04	qu_seaport_04	qu_airport_04	qu_elecserv_04	qu_telserv_04	tot_infra_04	subtot_avinfra_04	subtot_quinfra_04
Bali	Kota Denpasar	510302	0.004	0.0051	0.0017	0.0071	0.007	0.0035	0.0035	0.0026	0.0074	0.0052	0.0471	0.0249	0.0222
Bangka Belitung	Kota Pangkal Pinang	167200	0.004	0.0038	0.0017	0.0044	0.0007	0.0018	0.0031	0.0022	0.0074	0.0004	0.0295	0.0146	0.0149
Banten	Kota Cilegon	322000	0.004	0.0051	0.0017	0.0071	0.007	0.0018	0.0035	0.0022	0.0074	0.0052	0.045	0.0249	0.0201
Banten	Kota Tangerang	321902	0.0066	0.0038	0.0017	0.0071	0.0057	0.0035	0.0035	0.0026	0.0074	0.0052	0.0471	0.0249	0.0222
Bengkulu	Kota Bengkulu	177100	0.0005	0.0006	0.0017	0.001	0.0011	0.0006	0.0014	0.0022	0.0016	0.0008	0.0115	0.0049	0.0066
DI Yogyakarta	Kota Yogyakarta	347100	0.004	0.0033	0.0017	0.0071	0.0057	0.0035	0.0014	0.0026	0.0074	0.0052	0.0419	0.0218	0.0201
DKI Jakarta	Kota Jakarta	#N/A	0.0066	0.0051	0.0017	0.0071	0.007	0.0035	0.0035	0.0026	0.0074	0.0052	0.0497	0.0275	0.0222
Gorontalo	Kota Gorontalo	717100	0.004	0.0038	0.0017	0.0071	0.0057	0.0035	0.0031	0.0022	0.0074	0.0052	0.0437	0.0223	0.0214
Jambi	Kota Jambi	157100	0.0018	0.0033	0.0017	0.0044	0.0029	0.0018	0.0031	0.0026	0.0033	0.0022	0.0271	0.0141	0.013
Jawa Barat	Kota Bandung	327300	0.0066	0.0033	0.0017	0.0071	0.0057	0.0018	0.0014	0.0022	0.0033	0.0052	0.0383	0.0244	0.0139
Jawa Barat	Kota Bekasi	321802	0.0066	0.0033	0.0017	0.0071	0.007	0.0018	0.0014	0.0022	0.0033	0.0022	0.0366	0.0257	0.0109
Jawa Barat	Kota Bogor	327100	0.004	0.0038	0.0017	0.0071	0.0057	0.0018	0.0031	0.0022	0.0074	0.0052	0.042	0.0223	0.0197
Jawa Barat	Kota Cirebon	327400	0.004	0.0033	0.0006	0.0044	0.0057	0.0035	0.0014	0.0007	0.0033	0.0022	0.0291	0.018	0.0111
Jawa Barat	Kota Sukabumi	327200	0.004	0.0033	0.0017	0.0044	0.0057	0.0006	0.0014	0.0022	0.0074	0.0052	0.0359	0.0191	0.0168
Jawa Tengah	Kota Pekalongan	337500	0.004	0.0051	0.0006	0.0071	0.0057	0.0035	0.0014	0.0003	0.0074	0.0052	0.0403	0.0225	0.0178
Jawa Tengah	Kota Semarang	337400	0.0066	0.0051	0.0017	0.0071	0.0057	0.0018	0.0031	0.0026	0.0033	0.0052	0.0422	0.0262	0.016
Jawa Tengah	Kota Surakarta	337200	0.0066	0.0033	0.0017	0.0071	0.0057	0.0018	0.0014	0.0022	0.0074	0.0052	0.0424	0.0244	0.018
Jawa Tengah	Kota Tegal	337600	0.004	0.0051	0.0006	0.0071	0.007	0.0035	0.0031	0.0015	0.0074	0.0052	0.0445	0.0238	0.0207
Jawa Timur	Kota Kediri	357100	0.004	0.0033	0.0017	0.0071	0.0057	0.0018	0.0014	0.0022	0.0074	0.0052	0.0398	0.0218	0.018
Jawa Timur	Kota Madiun	357700	0.004	0.0013	0.0006	0.0044	0.0057	0.0035	0.0003	0.0003	0.0074	0.0052	0.0327	0.016	0.0167
Jawa Timur	Kota Malang	357300	0.0066	0.0013	0.0017	0.0071	0.007	0.0035	0.0014	0.0015	0.0074	0.0052	0.0427	0.0237	0.019
Jawa Timur	Kota Mojokerto	357600	0.004	0.0038	0.0017	0.0071	0.007	0.0035	0.0014	0.0015	0.0074	0.0052	0.0426	0.0236	0.019
Jawa Timur	Kota Probolinggo	357400	0.004	0.0038	0.0017	0.0071	0.0057	0.0018	0.0031	0.0026	0.0074	0.0052	0.0424	0.0223	0.0201
Jawa Timur	Kota Surabaya	357800	0.0066	0.0051	0.0017	0.0071	0.007	0.0035	0.0035	0.0026	0.0074	0.0052	0.0497	0.0275	0.0222
Kalimantan Barat	Kota Pontianak	617100	0.004	0.0051	0.0017	0.0044	0.0029	0.0035	0.0031	0.0026	0.0033	0.0022	0.0328	0.0181	0.0147
Kalimantan Selatan	Kota Banjarmasin	637100	0.004	0.0038	0.0017	0.0044	0.0029	0.0018	0.0031	0.0026	0.0033	0.0022	0.0298	0.0168	0.013
Kalimantan Tengah	Kota Palangkaraya	627100	0.0018	0.0033	0.0017	0.0031	0.0029	0.0018	0.0031	0.0015	0.0033	0.0022	0.0247	0.0128	0.0119
Kalimantan Timur	Kota Balikpapan	647100	0.004	0.0051	0.0017	0.0071	0.0057	0.0035	0.0031	0.0026	0.0033	0.0022	0.0383	0.0236	0.0147
Kalimantan Timur	Kota Samarinda	647200	0.0018	0.0038	0.0017	0.0044	0.0029	0.0018	0.0031	0.0015	0.0033	0.0022	0.0265	0.0146	0.0119
Lampung	Kota Bandar Lampung	187100	0.004	0.0038	0.0017	0.0031	0.0029	0.0018	0.0014	0.0022	0.0033	0.0008	0.025	0.0155	0.0095
Nusa Tenggara Barat	Kota Mataram	520102	0.004	0.0051	0.0017	0.0044	0.0029	0.0035	0.0031	0.0026	0.0074	0.0022	0.0369	0.0181	0.0188
Nusa Tenggara Timur	Kota Kupang	530302	0.0018	0.0051	0.0017	0.0031	0.0029	0.0018	0.0031	0.0015	0.0033	0.0022	0.0265	0.0146	0.0119
Papua	Kota Jayapura	820302	0.0018	0.0033	0.0017	0.001	0.0007	0.0006	0.0014	0.0015	0.0016	0.0008	0.0144	0.0085	0.0059
Papua	Kota Sorong	820600	0.0018	0.0013	0.0006	0.001	0.0007	0.0006	0.0014	0.0015	0.0016	0.0008	0.0113	0.0054	0.0059
Riau	Kota Batam	147200	0.0066	0.0051	0.0017	0.0071	0.0057	0.0035	0.0035	0.0026	0.0074	0.0052	0.0484	0.0262	0.0222
Riau	Kota Dumai	140500	0.0018	0.0051	0.0017	0.0044	0.0029	0.0018	0.0031	0.0015	0.0074	0.0022	0.0319	0.0159	0.016
Riau	Kota Pekanbaru	147100	0.0066	0.0038	0.0017	0.0044	0.0029	0.0035	0.0031	0.0026	0.0033	0.0022	0.0341	0.0194	0.0147
Riau	Kota Tanjung Pinang	140300	0.004	0.0038	0.0006	0.0031	0.0029	0.0018	0.0031	0.0015	0.0033	0.0008	0.0249	0.0144	0.0105
Sulawesi Selatan	Kota Makasar	737100	0.0066	0.0051	0.0017	0.0071	0.0057	0.0035	0.0035	0.0026	0.0074	0.0052	0.0484	0.0262	0.0222
Sulawesi Selatan	Kota Pare-Pare	737200	0.004	0.0038	0.0017	0.0044	0.0041	0.0035	0.0031	0.0022	0.0074	0.0022	0.0364	0.018	0.0184
Sulawesi Tengah	Kota Palu	720302	0.0005	0.0038	0.0017	0.0031	0.0007	0.0006	0.0031	0.0026	0.0033	0.0004	0.0198	0.0098	0.01
Sulawesi Tenggara	Kota Kendari	740302	0.0018	0.0038	0.0017	0.0031	0.0029	0.0018	0.0031	0.0026	0.0033	0.0022	0.0263	0.0133	0.013
Sulawesi Utara	Kota Bitung	710302	0.0018	0.0051	0.0017	0.0044	0.0029	0.0018	0.0031	0.0026	0.0033	0.0022	0.0289	0.0159	0.013
Sulawesi Utara	Kota Manado	717200	0.004	0.0038	0.0017	0.0044	0.0029	0.0018	0.0031	0.0026	0.0033	0.0022	0.0298	0.0168	0.013
Sumatera Barat	Kota Padang	137100	0.004	0.0038	0.0017	0.0031	0.0011	0.0018	0.0031	0.0026	0.0033	0.0008	0.0253	0.0137	0.0116
Sumatera Barat	Kota Sawahlunto	130302	0.0018	0.0033	0.0017	0.0031	0.0029	0.0018	0.0014	0.0022	0.0033	0.0022	0.0237	0.0128	0.0109
Sumatera Selatan	Kota Palembang	167100	0.004	0.0051	0.0017	0.0071	0.0029	0.0035	0.0031	0.0026	0.0074	0.0022	0.0396	0.0208	0.0188
Sumatera Utara	Kota Binjai	127600	0.0018	0.0033	0.0017	0.0044	0.0029	0.0018	0.0014	0.0022	0.0033	0.0022	0.025	0.0141	0.0109
Sumatera Utara	Kota Medan	127500	0.0066	0.0051	0.0017	0.0071	0.007	0.0035	0.0035	0.0022	0.0074	0.0052	0.0493	0.0275	0.0218
Sumatera Utara	Kota Pematang Siantar	127300	0.0018	0.0006	0.0003	0.0031	0.0029	0.0018	0.0003	0.0003	0.0033	0.0022	0.0166	0.0087	0.0079
Sumatera Utara	Kota Sibolga	127100	0.0018	0.0038	0.0006	0.0044	0.0029	0.0018	0.0031	0.0015	0.0033	0.0022	0.0254	0.0135	0.0119
Sumatera Utara	Kota Tanjung Balai	127200	0.004	0.0038	0.0017	0.0031	0.0057	0.0018	0.0031	0.0015	0.0033	0.0052	0.0332	0.0183	0.0149
Sumatera Utara	Kota Tebing Tinggi	127400	0.004	0.0038	0.0017	0.0044	0.0041	0.0035	0.0031	0.0022	0.0074	0.0052	0.0394	0.018	0.0214
Bali	Badung	510301	0.004	0.0038	0.0017	0.0031	0.0057	0.0035	0.0031	0.0026	0.0074	0.0022	0.0371	0.0183	0.0188
Bali	Bangli	510600	0.004	0.0038	0.0017	0.001	0.0029	0.004	0.0031	0.0022	0.0016	0.0022	0.0265	0.0134	0.0131
Bali	Buleleng	510800	0.004	0.0033	0.0017	0.0044	0.0057	0.0018	0.0014	0.0022	0.0033	0.0022	0.03	0.0191	0.0109
Bali	Gianyar	510400	0.004	0.0038	0.0017	0.0031	0.0057	0.0035	0.0031	0.0022	0.0074	0.0022	0.0367	0.0183	0.0184
Bali	Jembrana	510100	0.004	0.0033	0.0017	0.0031	0.0057	0.004	0.0031	0.0022	0.0074	0.0022	0.0367	0.0178	0.0189
Bali	Karangasem	510700	0.004	0.0038	0.0017	0.001	0.0029	0.0035	0.0031	0.0022	0.0016	0.0022	0.026	0.0134	0.0126
Bali	Klungkung	510500	0.004	0.0038	0.0017	0.0031	0.0057	0.0035	0.0031	0.0022	0.0074	0.0022	0.0367	0.0183	0.0184
Bali	Tabanan	510200	0.004	0.0033	0.0017	0.0031	0.0057	0.0035	0.0031	0.0022	0.0074	0.0022	0.0362	0.0178	0.0184
Bangka Belitung	Bangka	160700	0.004	0.0038	0.0017	0.0044	0.0007	0.0035	0.0031	0.0022	0.0008	0.0004	0.0246	0.0146	0.01
Bangka Belitung	Belitung	160700	0.0018	0.0038	0.0017	0.0005	0.0007	0.0035	0.0031	0.0022	0.0008	0.0004	0.0185	0.0085	0.01
Banten	Lebak	320200	0.0009	0.0033	0.0017	0.0031	0.0029	0.0018	0.0014	0.0015	0.0033	0.0022	0.0221	0.0119	0.0102
Banten	Serang	322000	0.004	0.0038	0.0017	0.0044	0.0029	0.0035	0.0031	0.0022	0.0074	0.0052	0.0382	0.0168	0.0214
Banten	Tangerang	321901	0.0066	0.0051	0.0017	0.0071	0.0057	0.0035	0.0035	0.0026	0.0074	0.0052	0.0484	0.0262	0.0222
Bengkulu	Bengkulu Selatan	170100	0.0005	0.0006	0.0006	0.001	0.0007	0.0003	0.0003	0.0015	0.0008	0.0004	0.0067	0.0034	0.0033
Bengkulu	Bengkulu Utara	170300	0.0018	0.0033	0.0017	0.0031	0.0007	0.0018	0.0014	0.0015	0.0033	0.0004	0.019	0.0106	0.0084
Bengkulu	Rejang Lebong	170200	0.0009	0.0013	0.0017	0.0031	0.0029	0.0018	0.0006	0.0015	0.0033	0.0022	0.0193	0.0099	0.0094
DI Yogyakarta	Bantul	340200	0.004	0.0033	0.0017	0.0044	0.0057	0.0035	0.0014	0.0026	0.0033	0.0052	0.0351	0.0191	0.016
DI Yogyakarta	Gunung Kidul	340300	0.0018	0.0006	0.0006	0.0031	0.0029	0.0018	0.0006	0.0015	0.0033	0.0022	0.0184	0.009	0.0094
Gorontalo	Gorontalo	710100	0.0018	0.0033	0.0017	0.0031	0.0029	0.0018	0.0014	0.0015	0.0033	0.0022	0.023	0.0128	0.0102
Jambi	Batanghari	150400	0.0018	0.0033	0.0017	0.0005	0.0011	0.0006	0.0014	0.0022	0.0016	0.0008	0.015	0.0084	0.0066
Jambi	Bungo	150200	0.0009	0.0033	0.0017	0.001	0.0007	0.0006	0.0014	0.0015	0.0008	0.0004	0.0123	0.0076	0.0047
Jambi	Kerinci	150100	0.0018	0.0006	0.0017	0.0031	0.0029	0.0018	0.0003	0.0015	0.0016	0.0008	0.0161	0.0101	0.006
Jambi	Tanjung Jabung Timur	150500	0.0005	0.0038	0.0003	0.0005	0.0007	0.0003	0.0014	0.0003	0.0008	0.0004	0.009	0.0058	0.0032
Jambi	Tebo	150200	0.0009	0.0006	0.0003	0.001	0.0011	0.0006	0.0003	0.0003	0.0033	0.0008	0.0092	0.0039	0.0053
Jawa Barat	Bandung	320600	0.0018	0.0013	0.0017	0.0044	0.0029	0.0018	0.0006	0.0015	0.0074	0.0052	0.0286	0.0121	0.0165
Jawa Barat	Bekasi	321801	0.0066	0.0051	0.0017	0.0071	0.007	0.0018	0.0031	0.0026	0.0033	0.0022	0.0405	0.0275	0.013
Jawa Barat	Bogor	320300	0.0018	0.0038	0.0017	0.0044	0.0057	0.0018	0.0031	0.0026	0.0074	0.0022	0.0345	0.0174	0.0171
Jawa Barat	Ciamis	320900	0.0018	0.0013	0.0006	0.0031	0.0029	0.0018	0.0006	0.0015	0.0033	0.0022	0.0191	0.0097	0.0094
Jawa Barat	Cianjur	320500	0.0018	0.0033	0.0017	0.0044	0.0029	0.0035	0.0014	0.0015	0.0033	0.0052	0.029	0.0141	0.0149
Jawa Barat	Cirebon	321100	0.0066	0.0033	0.0017	0.0031	0.0057	0.0035	0.0014	0.0015	0.0033	0.0052	0.0353	0.0204	0.0149
Jawa Barat	Garut	320700	0.0018	0.0013	0.0006	0.0044	0.0057	0.0018	0.0006	0.0007	0.0074	0.0022	0.0265	0.0138	0.0127
Jawa Barat	Indramayu	321400	0.004	0.0051	0.0017	0.0071	0.0057	0.0035	0.0031	0.0022	0.0074	0.0052	0.045	0.0236	0.0214
Jawa Barat	Karawang	321700	0.0066	0.0051	0.0017	0.0071	0.007	0.0035	0.0035	0.0026	0.0074	0.0052	0.0497	0.0275	0.0222
Jawa Barat	Kuningan	321000	0.0018	0.0033	0.0017	0.0044	0.0057	0.0035	0.0014	0.0015	0.0074	0.0022	0.0329	0.0169	0.016
Jawa Barat	Purwakarta	321600	0.004	0.0038	0.0017	0.0044	0.0057	0.0035	0.0031	0.0022	0.0033	0.0022	0.0339	0.0196	0.0143
Jawa Barat	Subang	321500	0.0018	0.0033	0.0017	0.0031	0.0029	0.0035	0.0014	0.0022	0.0074	0.0052	0.0325	0.0128	0.0197
Jawa Barat	Sukabumi	320400	0.004	0.0038	0.0017	0.0071	0.0057	0.0035	0.0031	0.0022	0.0033	0.0022	0.0366	0.0223	0.0143
Jawa Barat	Sumedang	321300	0.0018	0.0006	0.0006	0.0031	0.0029	0.0018	0.0014	0.0015	0.0033	0.0022	0.0192	0.009	0.0102
Jawa Barat	Tasikmalaya	320800	0.0018	0.0033	0.0017	0.0031	0.0029	0.0018	0.0014	0.0015	0.0074	0.0052	0.0301	0.0128	0.0173
Jawa Tengah	Banyumas	330200	0.004	0.0013	0.0006	0.0031	0.0057	0.0018	0.0006	0.0007	0.0016	0.0052	0.0246	0.0147	0.0099
Jawa Tengah	Boyolali	330900	0.004	0.0033	0.0017	0.0031	0.0057	0.0018	0.0006	0.0015	0.0033	0.0022	0.0272	0.0178	0.0094
Jawa Tengah	Cilacap	330100	0.004	0.0038	0.0017	0.0031	0.0057	0.0018	0.0031	0.0015	0.0033	0.0052	0.0332	0.0183	0.0149
Jawa Tengah	Jepara	332000	0.004	0.0051	0.0017	0.0044	0.0057	0.0035	0.0031	0.0022	0.0074	0.0052	0.0423	0.0209	0.0214
Jawa Tengah	Karanganyar	331300	0.004	0.0006	0.0006	0.0031	0.0057	0.0018	0.0006	0.0022	0.0033	0.0022	0.0241	0.014	0.0101
Jawa Tengah	Kebumen	330500	0.004	0.0013	0.0017	0.0031	0.0057	0.0018	0.0014	0.0015	0.0033	0.0022	0.026	0.0158	0.0102
Jawa Tengah	Kendal	332400	0.004	0.0033	0.0017	0.0031	0.0057	0.0018	0.0014	0.0022	0.0033	0.0022	0.0287	0.0178	0.0109
Jawa Tengah	Klaten	331000	0.004	0.0033	0.0017	0.0044	0.0057	0.0035	0.0014	0.0022	0.0074	0.0052	0.0388	0.0191	0.0197
Jawa Tengah	Kudus	331900	0.0066	0.0038	0.0017	0.0071	0.007	0.0035	0.0014	0.0022	0.0074	0.0052	0.0459	0.0262	0.0197
Jawa Tengah	Magelang	330800	0.004	0.0033	0.0017	0.0031	0.0057	0.0018	0.0014	0.0022	0.0033	0.0052	0.0317	0.0178	0.0139
Jawa Tengah	Pekalongan	332600	0.004	0.0051	0.0006	0.0044	0.0057	0.0018	0.0031	0.0007	0.0074	0.0052	0.038	0.0198	0.0182
Jawa Tengah	Pemalang	332700	0.004	0.0013	0.0006	0.0031	0.0057	0.0018	0.0014	0.0007	0.0033	0.0022	0.0241	0.0147	0.0094
Jawa Tengah	Sukoharjo	331100	0.004	0.0013	0.0017	0.0031	0.0057	0.0018	0.0014	0.0022	0.0033	0.0052	0.0297	0.0158	0.0139
Jawa Tengah	Tegal	332800	0.004	0.0033	0.0017	0.0031	0.0057	0.0018	0.0014	0.0022	0.0033	0.0022	0.0287	0.0178	0.0109
Jawa Tengah	Wonosobo	330700	0.004	0.0006	0.0006	0.0031	0.0057	0.0018	0.0006	0.0007	0.0016	0.0052	0.0239	0.014	0.0099
Jawa Timur	Bangkalan	352600	0.0009	0.0033	0.0017	0.0044	0.0057	0.0018	0.0031	0.0015	0.0033	0.0052	0.0309	0.016	0.0149
Jawa Timur	Banyuwangi	351000	0.004	0.0038	0.0017	0.0044	0.0057	0.0018	0.0031	0.0015	0.0074	0.0052	0.0386	0.0196	0.019
Jawa Timur	Blitar	350500	0.0066	0.0018	0.0006	0.0071	0.007	0.0035	0.0006	0.0007	0.0074	0.0052	0.0405	0.0231	0.0174
Jawa Timur	Bondowoso	351100	0.004	0.0033	0.0006	0.0031	0.0057	0.0018	0.0014	0.0022	0.0033	0.0022	0.0276	0.0167	0.0109
Jawa Timur	Gresik	352500	0.0066	0.0051	0.0017	0.0071	0.0057	0.0035	0.0031	0.0026	0.0074	0.0052	0.048	0.0262	0.0218
Jawa Timur	Jember	350900	0.0018	0.0033	0.0017	0.0044	0.0029	0.0018	0.0031	0.0015	0.0033	0.0022	0.026	0.0141	0.0119
Jawa Timur	Jombang	351700	0.004	0.0038	0.0017	0.0071	0.0057	0.0035	0.0031	0.0022	0.0074	0.0052	0.0437	0.0223	0.0214
Jawa Timur	Kediri	350600	0.0018	0.0013	0.0017	0.0044	0.0057	0.0018	0.0014	0.0015	0.0074	0.0052	0.0322	0.0149	0.0173
Jawa Timur	Lamongan	352400	0.004	0.0051	0.0017	0.0044	0.007	0.0035	0.0031	0.0015	0.0074	0.0052	0.0429	0.0222	0.0207
Jawa Timur	Magetan	352000	0.004	0.0018	0.0006	0.0031	0.0029	0.0035	0.0014	0.0015	0.0033	0.0022	0.0243	0.0124	0.0119
Jawa Timur	Mojokerto	351600	0.004	0.0051	0.0017	0.0071	0.0057	0.0035	0.0031	0.0026	0.0074	0.0052	0.0454	0.0236	0.0218
Jawa Timur	Pamekasan	352800	0.0018	0.0038	0.0017	0.0044	0.0057	0.0018	0.0031	0.0015	0.0033	0.0022	0.0293	0.0174	0.0119
Jawa Timur	Pasuruan	351400	0.0066	0.0038	0.0017	0.0071	0.007	0.0035	0.0031	0.0022	0.0074	0.0052	0.0476	0.0262	0.0214
Jawa Timur	Ponorogo	350200	0.0018	0.0033	0.0017	0.0031	0.0029	0.0018	0.0014	0.0022	0.0033	0.0022	0.0237	0.0128	0.0109
Jawa Timur	Sidoarjo	351500	0.004	0.0038	0.0017	0.0031	0.0029	0.0035	0.0031	0.0026	0.0033	0.0052	0.0332	0.0155	0.0177
Jawa Timur	Situbondo	351200	0.0018	0.0033	0.0006	0.0031	0.0029	0.0018	0.0014	0.0015	0.0033	0.0022	0.0219	0.0117	0.0102
Jawa Timur	Tulungagung	350400	0.0018	0.0013	0.0006	0.0044	0.0057	0.0035	0.0014	0.0007	0.0074	0.0052	0.032	0.0138	0.0182
Kalimantan Barat	Kapuas Hulu	610600	0.0005	0.0033	0.0003	0.001	0.0011	0.0006	0.0014	0.0015	0.0033	0.0008	0.0138	0.0062	0.0076
Kalimantan Barat	Ketapang	610400	0.0005	0.0038	0.0003	0.001	0.0011	0.0003	0.0031	0.0026	0.0016	0.0008	0.0151	0.0067	0.0084
Kalimantan Barat	Pontianak	610200	0.0009	0.0051	0.0017	0.0031	0.0011	0.0018	0.0031	0.0026	0.0033	0.0004	0.0231	0.0119	0.0112
Kalimantan Barat	Sambas	610100	0.0009	0.0033	0.0003	0.001	0.0011	0.0018	0.0014	0.0003	0.0016	0.0008	0.0125	0.0066	0.0059
Kalimantan Barat	Sanggau	610300	0.0009	0.0006	0.0003	0.001	0.0007	0.0006	0.0006	0.0003	0.0016	0.0008	0.0074	0.0035	0.0039
Kalimantan Selatan	Hulu Sungai Selatan	630600	0.0018	0.0038	0.0017	0.0031	0.0029	0.0018	0.0031	0.0026	0.0033	0.0022	0.0263	0.0133	0.013
Kalimantan Selatan	Hulu Sungai Tengah	630700	0.0018	0.0033	0.0017	0.0031	0.0029	0.0018	0.0014	0.0022	0.0033	0.0022	0.0237	0.0128	0.0109
Kalimantan Selatan	Hulu Sungai Utara	630800	0.0009	0.0033	0.0017	0.001	0.0029	0.0018	0.0014	0.0015	0.0033	0.0008	0.0186	0.0098	0.0088
Kalimantan Selatan	Tabalong	630900	0.0018	0.0013	0.0017	0.0044	0.0029	0.0018	0.0006	0.0015	0.0074	0.0052	0.0286	0.0121	0.0165
Kalimantan Selatan	Tanah Laut	630100	0.0018	0.0038	0.0017	0.0044	0.0029	0.0018	0.0031	0.0022	0.0074	0.0052	0.0343	0.0146	0.0197
Kalimantan Selatan	Tapin	630500	0.0005	0.0033	0.0017	0.0005	0.0011	0.0003	0.0014	0.0015	0.0008	0.0004	0.0115	0.0071	0.0044
Kalimantan Tengah	Barito Selatan	620400	0.0009	0.0006	0.0003	0.001	0.0007	0.0003	0.0003	0.0003	0.0033	0.0008	0.0085	0.0035	0.005
Kalimantan Tengah	Barito Utara	620500	0.0018	0.0033	0.0003	0.0031	0.0029	0.0018	0.0014	0.0015	0.0033	0.0008	0.0202	0.0114	0.0088
Kalimantan Tengah	Kapuas	620300	0.0009	0.0033	0.0003	0.0031	0.0029	0.0018	0.0014	0.0015	0.0033	0.0008	0.0193	0.0105	0.0088
Kalimantan Timur	Berau	640300	0.0009	0.0033	0.0003	0.0005	0.0007	0.0003	0.0014	0.0022	0.0016	0.0004	0.0116	0.0057	0.0059
Kalimantan Timur	Bulungan	640400	0.0009	0.0038	0.0017	0.0031	0.0007	0.0018	0.0031	0.0026	0.0033	0.0004	0.0214	0.0102	0.0112
Kalimantan Timur	Kutai	640200	0.0009	0.0033	0.0017	0.0031	0.0029	0.0018	0.0014	0.0015	0.0033	0.0008	0.0207	0.0119	0.0088
Kalimantan Timur	Kutai Timur	640200	0.0005	0.0006	0.0003	0.0005	0.0007	0.0003	0.0003	0.0003	0.0008	0.0004	0.0047	0.0026	0.0021
Kalimantan Timur	Nunukan	640400	0.0005	0.0038	0.0003	0.0031	0.0007	0.0018	0.0031	0.0022	0.0033	0.0004	0.0192	0.0084	0.0108
Kalimantan Timur	Pasir	640100	0.0018	0.0038	0.0017	0.001	0.0007	0.0018	0.0014	0.0015	0.0033	0.0008	0.0178	0.009	0.0088
Lampung	Lampung Barat	180302	0.0018	0.0033	0.0006	0.0031	0.0029	0.0018	0.0014	0.0007	0.0033	0.0022	0.0211	0.0117	0.0094
Lampung	Lampung Selatan	180101	0.0009	0.0038	0.0017	0.0031	0.0011	0.0006	0.0031	0.0022	0.0033	0.0008	0.0206	0.0106	0.01
Lampung	Lampung Timur	180200	0.0018	0.0033	0.0017	0.0031	0.0029	0.0006	0.0031	0.0015	0.0016	0.0008	0.0204	0.0128	0.0076
Lampung	Lampung Utara	180300	0.0005	0.0033	0.0017	0.0005	0.0011	0.0003	0.0014	0.0015	0.0008	0.0004	0.0115	0.0071	0.0044
Lampung	Way Kanan	180300	0.0018	0.0006	0.0003	0.0031	0.0029	0.0018	0.0003	0.0007	0.0033	0.0022	0.017	0.0087	0.0083
Nusa Tenggara Barat	Bima	520600	0.0009	0.0038	0.0017	0.0031	0.0029	0.0018	0.0031	0.0022	0.0033	0.0022	0.025	0.0124	0.0126
Nusa Tenggara Barat	Dompu	520500	0.0009	0.0033	0.0017	0.0031	0.0029	0.0006	0.0031	0.0015	0.0033	0.0022	0.0226	0.0119	0.0107
Nusa Tenggara Barat	Lombok Barat	520101	0.0018	0.0038	0.0017	0.0031	0.0029	0.0018	0.0031	0.0022	0.0033	0.0008	0.0245	0.0133	0.0112
Nusa Tenggara Barat	Lombok Timur	520300	0.0018	0.0038	0.0017	0.0031	0.0029	0.0035	0.0031	0.0022	0.0033	0.0022	0.0276	0.0133	0.0143
Nusa Tenggara Timur	Belu	530600	0.0018	0.0033	0.0006	0.0031	0.0011	0.0018	0.0006	0.0007	0.0033	0.0008	0.0171	0.0099	0.0072
Nusa Tenggara Timur	Ende	531000	0.0018	0.0038	0.0017	0.001	0.0011	0.0018	0.0014	0.0026	0.0033	0.0008	0.0193	0.0094	0.0099
Nusa Tenggara Timur	Flores Timur	530800	0.0018	0.0038	0.0006	0.0031	0.0029	0.0018	0.0014	0.0015	0.0033	0.0022	0.0224	0.0122	0.0102
Nusa Tenggara Timur	Manggarai	531200	0.0005	0.0013	0.0017	0.0005	0.0007	0.0003	0.0014	0.0015	0.0008	0.0004	0.0091	0.0047	0.0044
Nusa Tenggara Timur	Ngada	531100	0.0005	0.0033	0.0003	0.0005	0.0007	0.0003	0.0014	0.0003	0.0008	0.0004	0.0085	0.0053	0.0032
Nusa Tenggara Timur	Sumba Barat	530100	0.0009	0.0033	0.0017	0.0005	0.0011	0.0006	0.0014	0.0015	0.0016	0.0008	0.0134	0.0075	0.0059
Nusa Tenggara Timur	Timur Tengah Selatan	530400	0.0018	0.0033	0.0017	0.0031	0.0029	0.0018	0.0014	0.0015	0.0033	0.0022	0.023	0.0128	0.0102
Nusa Tenggara Timur	Timur Tengah Utara	530500	0.0018	0.0013	0.0006	0.0031	0.0029	0.0018	0.0006	0.0007	0.0033	0.0022	0.0183	0.0097	0.0086
Papua	Fak-Fak	820500	0.0009	0.0013	0.0006	0.0005	0.0007	0.0003	0.0014	0.0015	0.0008	0.0004	0.0084	0.004	0.0044
Papua	Jayawijaya	820200	0.0009	0.0033	0.0017	0.001	0.0011	0.0006	0.0014	0.0015	0.0033	0.0022	0.017	0.008	0.009
Papua	Manokwari	820700	0.0018	0.0033	0.0017	0.001	0.0011	0.0018	0.0014	0.0026	0.0016	0.0008	0.0171	0.0089	0.0082
Papua	Mimika	820500	0.0009	0.0033	0.0017	0.001	0.0011	0.0006	0.0014	0.0015	0.0033	0.0022	0.017	0.008	0.009
Papua	Sorong	820600	0.0005	0.0033	0.0017	0.001	0.0007	0.0003	0.0014	0.0015	0.0016	0.0004	0.0124	0.0072	0.0052
Riau	Bengkalis	140500	0.0005	0.0033	0.0003	0.0005	0.0007	0.0003	0.0014	0.0003	0.0016	0.0008	0.0097	0.0053	0.0044
Riau	Indragiri Hilir	140200	0.0005	0.0038	0.0003	0.001	0.0007	0.0006	0.0031	0.0007	0.0016	0.0004	0.0127	0.0063	0.0064
Riau	Kampar	140400	0.0018	0.0033	0.0017	0.0005	0.0011	0.0018	0.0014	0.0022	0.0016	0.0022	0.0176	0.0084	0.0092
Riau	Kuantan Singingi	140100	0.0005	0.0006	0.0003	0.001	0.0011	0.0003	0.0003	0.0003	0.0016	0.0008	0.0068	0.0035	0.0033
Riau	Pelalawan	140400	0.0018	0.0038	0.0017	0.0005	0.0007	0.0018	0.0031	0.0015	0.0008	0.0008	0.0165	0.0085	0.008
Riau	Rokan Hulu	140400	0.0005	0.0006	0.0003	0.0005	0.0007	0.0003	0.0006	0.0015	0.0008	0.0004	0.0062	0.0026	0.0036
Sulawesi Selatan	Bantaeng	730300	0.0018	0.0033	0.0017	0.0031	0.0011	0.0018	0.0014	0.0015	0.0033	0.0022	0.0212	0.011	0.0102
Sulawesi Selatan	Barru	731000	0.004	0.0038	0.0017	0.0005	0.0057	0.0035	0.0031	0.0026	0.0008	0.0052	0.0309	0.0157	0.0152
Sulawesi Selatan	Bone	731100	0.0018	0.0038	0.0017	0.0031	0.0029	0.0018	0.0031	0.0022	0.0033	0.0022	0.0259	0.0133	0.0126
Sulawesi Selatan	Enrekang	731600	0.0018	0.0033	0.0017	0.0031	0.0029	0.0018	0.0014	0.0022	0.0033	0.0022	0.0237	0.0128	0.0109
Sulawesi Selatan	Gowa	730600	0.004	0.0038	0.0017	0.0044	0.0057	0.0035	0.0031	0.0022	0.0033	0.0052	0.0369	0.0196	0.0173
Sulawesi Selatan	Jeneponto	730400	0.0018	0.0038	0.0017	0.0031	0.0057	0.0018	0.0031	0.0022	0.0033	0.0022	0.0287	0.0161	0.0126
Sulawesi Selatan	Luwu	731700	0.0018	0.0038	0.0017	0.0005	0.0011	0.0018	0.0014	0.0015	0.0008	0.0004	0.0148	0.0089	0.0059
Sulawesi Selatan	Luwu Utara	731700	0.0018	0.0038	0.0017	0.0031	0.0029	0.0018	0.0031	0.0022	0.0033	0.0022	0.0259	0.0133	0.0126
Sulawesi Selatan	Majene	732000	0.004	0.0038	0.0017	0.0031	0.0057	0.0035	0.0031	0.0022	0.0033	0.0022	0.0326	0.0183	0.0143
Sulawesi Selatan	Maros	730800	0.0018	0.0033	0.0017	0.0031	0.0029	0.0035	0.0031	0.0026	0.0033	0.0022	0.0275	0.0128	0.0147
Sulawesi Selatan	Pangkep	730900	0.0018	0.0033	0.0017	0.0031	0.0057	0.0018	0.0031	0.0022	0.0016	0.0022	0.0265	0.0156	0.0109
Sulawesi Selatan	Pinrang	731500	0.004	0.0038	0.0017	0.0031	0.0057	0.0035	0.0031	0.0022	0.0033	0.0022	0.0326	0.0183	0.0143
Sulawesi Selatan	Selayar	730100	0.0018	0.0033	0.0017	0.0031	0.0011	0.0003	0.0031	0.0015	0.0033	0.0008	0.02	0.011	0.009
Sulawesi Selatan	Sinjai	730700	0.004	0.0038	0.0017	0.0031	0.0029	0.0035	0.0031	0.0022	0.0033	0.0022	0.0298	0.0155	0.0143
Sulawesi Selatan	Takalar	730500	0.0018	0.0033	0.0017	0.0031	0.0057	0.0018	0.0031	0.0022	0.0074	0.0052	0.0353	0.0156	0.0197
Sulawesi Selatan	Tana Toraja	731800	0.0005	0.0033	0.0006	0.0005	0.0011	0.0018	0.0014	0.0015	0.0008	0.0022	0.0137	0.006	0.0077
Sulawesi Tengah	Banggai	720100	0.0018	0.0033	0.0017	0.0031	0.0007	0.0018	0.0031	0.0015	0.0033	0.0008	0.0211	0.0106	0.0105
Sulawesi Tengah	Donggala	720300	0.0018	0.0033	0.0017	0.0031	0.0007	0.0018	0.0031	0.0015	0.0033	0.0008	0.0211	0.0106	0.0105
Sulawesi Tengah	Morowali	720200	0.0005	0.0033	0.0006	0.0005	0.0007	0.0003	0.0014	0.0015	0.0016	0.0004	0.0108	0.0056	0.0052
Sulawesi Tengah	Poso	720200	0.0018	0.0033	0.0017	0.001	0.0029	0.0018	0.0014	0.0007	0.0016	0.0004	0.0166	0.0107	0.0059
Sulawesi Tengah	Toli-Toli	720400	0.0005	0.0033	0.0017	0.0005	0.0007	0.0003	0.0014	0.0003	0.0008	0.0004	0.0099	0.0067	0.0032
Sulawesi Tenggara	Buton	740100	0.0018	0.0033	0.0017	0.0031	0.0029	0.0035	0.0031	0.0015	0.0033	0.0022	0.0264	0.0128	0.0136
Sulawesi Tenggara	Kolaka	740400	0.0018	0.0033	0.0017	0.0031	0.0029	0.0035	0.0031	0.0015	0.0033	0.0022	0.0264	0.0128	0.0136
Sulawesi Utara	Minahasa	710300	0.0018	0.0033	0.0017	0.0031	0.0029	0.0018	0.0031	0.0015	0.0033	0.0022	0.0247	0.0128	0.0119
Sulawesi Utara	Sangihe	710400	0.0018	0.0033	0.0017	0.0031	0.0029	0.0018	0.0031	0.0015	0.0033	0.0022	0.0247	0.0128	0.0119
Sumatera Barat	Pasaman	130800	0.0005	0.0006	0.0006	0.0005	0.0029	0.0003	0.0006	0.0007	0.0008	0.0004	0.0079	0.0051	0.0028
Sumatera Barat	Pesisir Selatan	130100	0.004	0.0038	0.0017	0.0031	0.0029	0.0035	0.0031	0.0022	0.0033	0.0022	0.0298	0.0155	0.0143
Sumatera Barat	Sawah Lunto Sijunjung	130300	0.004	0.0038	0.0017	0.0031	0.0029	0.0035	0.0031	0.0022	0.0016	0.0004	0.0263	0.0155	0.0108
Sumatera Barat	Solok	130200	0.004	0.0038	0.0017	0.0031	0.0029	0.0018	0.0014	0.0022	0.0033	0.0022	0.0264	0.0155	0.0109
Sumatera Selatan	Lahat	160400	0.0018	0.0033	0.0017	0.0044	0.0029	0.0006	0.0006	0.0015	0.0033	0.0008	0.0209	0.0141	0.0068
Sumatera Selatan	Muara Enim	160300	0.0009	0.0006	0.0006	0.0031	0.0029	0.0006	0.0006	0.0003	0.0033	0.0008	0.0137	0.0081	0.0056
Sumatera Selatan	Musi Banyuasin	160600	0.0018	0.0033	0.0017	0.0031	0.0029	0.0018	0.0031	0.0015	0.0033	0.0008	0.0233	0.0128	0.0105
Sumatera Selatan	Musi Rawas	160500	0.0005	0.0006	0.0006	0.0031	0.0007	0.0018	0.0006	0.0015	0.0033	0.0008	0.0135	0.0055	0.008
Sumatera Selatan	Ogan Komiring Ilir	160200	0.0018	0.0033	0.0017	0.0031	0.0029	0.0035	0.0031	0.0015	0.0033	0.0008	0.025	0.0128	0.0122
Sumatera Utara	Asahan	120600	0.0018	0.0038	0.0017	0.0044	0.0029	0.0018	0.0031	0.0022	0.0033	0.0052	0.0302	0.0146	0.0156
Sumatera Utara	Dairi	120800	0.0018	0.0013	0.0017	0.0031	0.0029	0.0018	0.0006	0.0007	0.0033	0.0022	0.0194	0.0108	0.0086
Sumatera Utara	Deli Serdang	121000	0.0018	0.0033	0.0017	0.0031	0.0029	0.0018	0.0014	0.0022	0.0033	0.0004	0.0219	0.0128	0.0091
Sumatera Utara	Labuhan Batu	120500	0.0009	0.0033	0.0017	0.0044	0.0029	0.0018	0.0014	0.0022	0.0074	0.0022	0.0282	0.0132	0.015
Sumatera Utara	Langkat	121100	0.0018	0.0033	0.0017	0.0044	0.0029	0.0018	0.0014	0.0015	0.0033	0.0022	0.0243	0.0141	0.0102
Sumatera Utara	Simalungun	120700	0.0018	0.0006	0.0003	0.0044	0.0029	0.0018	0.0014	0.0015	0.0033	0.0022	0.0202	0.01	0.0102
Sumatera Utara	Karo	120900	0.0018	0.0033	0.0017	0.0031	0.0029	0.0018	0.0014	0.0015	0.0074	0.0022	0.0271	0.0128	0.0143
Sumatera Utara	Tapanuli Utara	120400	0.0018	0.0006	0.0003	0.001	0.0029	0.0018	0.0003	0.0003	0.0016	0.0022	0.0128	0.0066	0.0062

## Sheet: inst_04
prov_kppod_04	kab_kppod_04	kabID97	serv_proc_04	abuse_auth_04	subtot_appserv_04	retrib_tax_04	devbudget_apdb_04	subtot_regfin_04	reg_cons_04	law_enforce_04	illegal_levy_04	exec_leg_04	subtot_lawcert_04	rpolreg_04	tot_inst_04
Bali	Kota Denpasar	510302	0.0031	0.0061	0.0092	0.0132	0.0023	0.0155	0.0054	0.0034	0.0051	0.003	0.0169	0.0046	0.0663
Bangka Belitung	Kota Pangkal Pinang	167200	0.0031	0.0015	0.0046	0.0031	0.0023	0.0054	0.0054	0.0034	0.0006	0.003	0.0124	0.0147	0.0324
Banten	Kota Cilegon	322000	0.0126	0.012	0.0246	0.0132	0.0023	0.0155	0.0165	0.0151	0.0025	0.0072	0.0413	0.0046	0.1215
Banten	Kota Tangerang	321902	0.0031	0.003	0.0061	0.0132	0.0037	0.0169	0.0054	0.007	0.0012	0.003	0.0166	0.0046	0.0626
Bengkulu	Kota Bengkulu	177100	0.0031	0.0008	0.0039	0.0051	0.0014	0.0065	0.0024	0.007	0.0025	0.003	0.0149	0.0147	0.0357
DI Yogyakarta	Kota Yogyakarta	347100	0.0062	0.003	0.0092	0.0083	0.0009	0.0092	0.0054	0.007	0.0012	0.003	0.0166	0.0147	0.0534
DKI Jakarta	Kota Jakarta	#N/A	0.0031	0.003	0.0061	#N/A	#N/A	#N/A	0.0054	0.0034	0.0006	0.003	0.0124	0.0147	#N/A
Gorontalo	Kota Gorontalo	717100	0.0126	0.012	0.0246	0.002	0.0023	0.0043	0.0165	0.0151	0.0099	0.003	0.0445	0.0147	0.1023
Jambi	Kota Jambi	157100	0.0062	0.0061	0.0123	0.0051	0.0009	0.006	0.0054	0.007	0.0051	0.003	0.0205	0.0147	0.0571
Jawa Barat	Kota Bandung	327300	0.0016	0.0008	0.0024	0.0083	0.0023	0.0106	0.0024	0.0034	0.0006	0.0007	0.0071	0.0147	0.0331
Jawa Barat	Kota Bekasi	321802	0.0031	0.003	0.0061	0.0051	0.0037	0.0088	0.0054	0.007	0.0012	0.003	0.0166	0.0147	0.0464
Jawa Barat	Kota Bogor	327100	0.0062	0.012	0.0182	0.0083	0.0023	0.0106	0.0024	0.007	0.0025	0.003	0.0149	0.0046	0.0725
Jawa Barat	Kota Cirebon	327400	0.0031	0.003	0.0061	0.0051	0.0023	0.0074	0.0054	0.0034	0.0012	0.0007	0.0107	0.0147	0.0377
Jawa Barat	Kota Sukabumi	327200	0.0062	0.0015	0.0077	0.002	0.0023	0.0043	0.0054	0.007	0.0006	0.003	0.016	0.0147	0.04
Jawa Tengah	Kota Pekalongan	337500	0.0062	0.003	0.0092	0.0083	0.0037	0.012	0.0054	0.007	0.0025	0.0007	0.0156	0.0147	0.058
Jawa Tengah	Kota Semarang	337400	0.0062	0.0061	0.0123	0.0083	0.0059	0.0142	0.0054	0.007	0.0025	0.003	0.0179	0.0147	0.0709
Jawa Tengah	Kota Surakarta	337200	0.0031	0.003	0.0061	0.0083	0.0009	0.0092	0.0024	0.0018	0.0051	0.003	0.0123	0.0217	0.0429
Jawa Tengah	Kota Tegal	337600	0.0126	0.0061	0.0187	0.002	0.0037	0.0057	0.0165	0.0151	0.0051	0.0072	0.0439	0.0046	0.0927
Jawa Timur	Kota Kediri	357100	0.0126	0.012	0.0246	0.0083	0.0014	0.0097	0.0165	0.0151	0.0051	0.003	0.0397	0.0147	0.1083
Jawa Timur	Kota Madiun	357700	0.0126	0.0061	0.0187	0.0051	0.0059	0.011	0.0095	0.0151	0.0025	0.003	0.0301	0.0147	0.0895
Jawa Timur	Kota Malang	357300	0.0062	0.003	0.0092	0.0083	0.0014	0.0097	0.0165	0.0151	0.0051	0.003	0.0397	0.0147	0.0775
Jawa Timur	Kota Mojokerto	357600	0.0062	0.012	0.0182	0.0051	0.0023	0.0074	0.0095	0.0151	0.0099	0.003	0.0375	0.0147	0.0887
Jawa Timur	Kota Probolinggo	357400	0.0062	0.0015	0.0077	0.0031	0.0023	0.0054	0.0165	0.0151	0.0006	0.003	0.0352	0.0147	0.0614
Jawa Timur	Kota Surabaya	357800	0.0062	0.0008	0.007	0.0083	0.0014	0.0097	0.0054	0.007	0.0012	0.0048	0.0184	0.0147	0.0518
Kalimantan Barat	Kota Pontianak	617100	0.0062	0.003	0.0092	0.0083	0.0023	0.0106	0.0095	0.0151	0.0006	0.003	0.0282	0.0147	0.0678
Kalimantan Selatan	Kota Banjarmasin	637100	0.0062	0.003	0.0092	0.0083	0.0014	0.0097	0.0054	0.007	0.0025	0.003	0.0179	0.0147	0.0557
Kalimantan Tengah	Kota Palangkaraya	627100	0.0016	0.0008	0.0024	0.0051	0.0023	0.0074	0.0054	0.0034	0.0025	0.003	0.0143	0.0147	0.0339
Kalimantan Timur	Kota Balikpapan	647100	0.0062	0.003	0.0092	0.0132	0.0059	0.0191	0.0095	0.0151	0.0051	0.003	0.0327	0.0147	0.0893
Kalimantan Timur	Kota Samarinda	647200	0.0016	0.0008	0.0024	0.0051	0.0059	0.011	0.0024	0.0018	0.0006	0.003	0.0078	0.0147	0.0346
Lampung	Kota Bandar Lampung	187100	0.0031	0.003	0.0061	0.0132	0.0009	0.0141	0.0054	0.007	0.0025	0.003	0.0179	0.0147	0.0583
Nusa Tenggara Barat	Kota Mataram	520102	0.0062	0.003	0.0092	0.0083	0.0023	0.0106	0.0054	0.007	0.0025	0.0015	0.0164	0.0046	0.056
Nusa Tenggara Timur	Kota Kupang	530302	0.0016	0.0061	0.0077	0.0083	0.0009	0.0092	0.0165	0.0151	0.0025	0.003	0.0371	0.0147	0.0709
Papua	Kota Jayapura	820302	0.0062	0.003	0.0092	0.0083	0.0023	0.0106	0.0012	0.0018	0.0025	0.003	0.0085	0.0147	0.0481
Papua	Kota Sorong	820600	0.0016	0.0008	0.0024	0.0083	0.0037	0.012	0.0012	0.0151	0.0006	0.0007	0.0176	0.0147	0.0464
Riau	Kota Batam	147200	0.0016	0.003	0.0046	0.0083	0.0059	0.0142	0.0012	0.0018	0.0006	0.003	0.0066	0.0147	0.0442
Riau	Kota Dumai	140500	0.0062	0.003	0.0092	0.0083	0.0059	0.0142	0.0165	0.0151	0.0012	0.0072	0.04	0.0147	0.0868
Riau	Kota Pekanbaru	147100	0.0062	0.003	0.0092	0.0083	0.0023	0.0106	0.0054	0.007	0.0012	0.003	0.0166	0.0147	0.0562
Riau	Kota Tanjung Pinang	140300	0.0016	0.0008	0.0024	0.0132		0.0132	0.0024	0.0018	0.0006	0.0007	0.0055	0.0046
Sulawesi Selatan	Kota Makasar	737100	0.0126	0.012	0.0246	0.0083	0.0009	0.0092	0.0054	0.007	0.0051	0.003	0.0205	0.0147	0.0881
Sulawesi Selatan	Kota Pare-Pare	737200	0.0126	0.012	0.0246	0.002	0.0023	0.0043	0.0165	0.0151	0.0051	0.003	0.0397	0.0147	0.0975
Sulawesi Tengah	Kota Palu	720302	0.0031	0.0008	0.0039	0.0132	0.0059	0.0191	0.0024	0.007	0.0012	0.003	0.0136	0.0147	0.0596
Sulawesi Tenggara	Kota Kendari	740302	0.0062	0.0015	0.0077	0.0083	0.0014	0.0097	0.0054	0.0151	0.0025	0.003	0.026	0.0147	0.0608
Sulawesi Utara	Kota Bitung	710302	0.0016	0.0015	0.0031	0.0051	0.0023	0.0074	0.0054	0.007	0.0012	0.0015	0.0151	0.0147	0.0361
Sulawesi Utara	Kota Manado	717200	0.0016	0.0015	0.0031	0.0083	0.0014	0.0097	0.0024	0.007	0.0025	0.0015	0.0134	0.0046	0.039
Sumatera Barat	Kota Padang	137100	0.0062	0.003	0.0092	0.0132	0.0009	0.0141	0.0024	0.007	0.0006	0.0015	0.0115	0.0147	0.0581
Sumatera Barat	Kota Sawahlunto	130302	0.0248	0.012	0.0368	0.0031	0.0023	0.0054	0.0054	0.007	0.0099	0.0043	0.0266	0.0147	0.111
Sumatera Selatan	Kota Palembang	167100	0.0031	0.0008	0.0039	0.0083	0.0014	0.0097	0.0024	0.0018	0.0006	0.003	0.0078	0.0147	0.035
Sumatera Utara	Kota Binjai	127600	0.0031	0.003	0.0061	0.0051	0.0014	0.0065	0.0095	0.007	0.0006	0.003	0.0201	0.0147	0.0453
Sumatera Utara	Kota Medan	127500	0.0031	0.0015	0.0046	0.0083	0.0023	0.0106	0.0165	0.007	0.0006	0.003	0.0271	0.0046	0.0575
Sumatera Utara	Kota Pematang Siantar	127300	0.0062	0.003	0.0092	0.0051	0.0037	0.0088	0.0095	0.007	0.0012	0.003	0.0207	0.0147	0.0567
Sumatera Utara	Kota Sibolga	127100	0.0031	0.0061	0.0092	0.002	0.0059	0.0079	0.0054	0.007	0.0006	0.003	0.016	0.0046	0.0502
Sumatera Utara	Kota Tanjung Balai	127200	0.0031	0.003	0.0061	0.0051	0.0023	0.0074	0.0165	0.0151	0.0025	0.003	0.0371	0.0147	0.0641
Sumatera Utara	Kota Tebing Tinggi	127400	0.0062	0.003	0.0092	0.0083	0.0023	0.0106	0.0165	0.007	0.0051	0.0043	0.0329	0.0046	0.0725
Bali	Badung	510301	0.0062	0.0061	0.0123	0.0132	0.0059	0.0191	0.0054	0.007	0.0051	0.003	0.0205	0.0147	0.0833
Bali	Bangli	510600	0.0062	0.0061	0.0123	0.0031	0.0023	0.0054	0.0024	0.007	0.0051	0.003	0.0175	0.0147	0.0529
Bali	Buleleng	510800	0.0062	0.003	0.0092	0.0083	0.0009	0.0092	0.0054	0.0034	0.0051	0.0015	0.0154	0.0147	0.0522
Bali	Gianyar	510400	0.0126	0.012	0.0246	0.0132	0.0037	0.0169	0.0054	0.007	0.0099	0.003	0.0253	0.0147	0.1083
Bali	Jembrana	510100	0.0126	0.0061	0.0187	0.0031	0.0009	0.004	0.0054	0.007	0.0051	0.003	0.0205	0.0046	0.0659
Bali	Karangasem	510700	0.0126	0.0061	0.0187	0.0132	0.0023	0.0155	0.0095	0.0151	0.0051	0.003	0.0327	0.0046	0.1011
Bali	Klungkung	510500	0.0126	0.012	0.0246	0.0051	0.0023	0.0074	0.0054	0.007	0.0099	0.003	0.0253	0.0147	0.0893
Bali	Tabanan	510200	0.0062	0.003	0.0092	0.0083	0.0023	0.0106	0.0054	0.007	0.0051	0.003	0.0205	0.0147	0.0601
Bangka Belitung	Bangka	160700	0.0062	0.0015	0.0077	0.0083	0.0037	0.012	0.0054	0.0034	0.0025	0.003	0.0143	0.0046	0.0537
Bangka Belitung	Belitung	160700	0.0062	0.0061	0.0123	0.0132	0.0014	0.0146	0.0054	0.0034	0.0051	0.003	0.0169	0.0046	0.0707
Banten	Lebak	320200	0.0126	0.003	0.0156	0.002	0.0023	0.0043	0.0095	0.0151	0.0025	0.003	0.0301	0.0147	0.0699
Banten	Serang	322000	0.0062	0.003	0.0092	0.0051	0.0014	0.0065	0.0054	0.0151	0.0025	0.003	0.026	0.0147	0.0574
Banten	Tangerang	321901	0.0016	0.0008	0.0024	0.0083	0.0023	0.0106	0.0054	0.0034	0.0012	0.0015	0.0115	0.0147	0.0375
Bengkulu	Bengkulu Selatan	170100	0.0016	0.0008	0.0024	0.0051	0.0009	0.006	0.0012	0.0034	0.0025	0.0007	0.0078	0.0147	0.0246
Bengkulu	Bengkulu Utara	170300	0.0126	0.003	0.0156	0.0051	0.0014	0.0065	0.0054	0.0034	0.0025	0.003	0.0143	0.0147	0.0585
Bengkulu	Rejang Lebong	170200	0.0248	0.0061	0.0309	0.0031	0.0014	0.0045	0.0054	0.0151	0.0025	0.003	0.026	0.0147	0.0968
DI Yogyakarta	Bantul	340200	0.0062	0.003	0.0092	0.0031	0.0009	0.004	0.0095	0.0151	0.0025	0.003	0.0301	0.0147	0.0565
DI Yogyakarta	Gunung Kidul	340300	0.0126	0.0061	0.0187	0.002	0.0014	0.0034	0.0095	0.007	0.0099	0.003	0.0294	0.0147	0.0736
Gorontalo	Gorontalo	710100	0.0062	0.0061	0.0123	0.002	0.0014	0.0034	0.0095	0.0151	0.0051	0.003	0.0327	0.0147	0.0641
Jambi	Batanghari	150400	0.0062	0.0061	0.0123	0.002	0.0037	0.0057	0.0054	0.0151	0.0051	0.003	0.0286	0.0217	0.0646
Jambi	Bungo	150200	0.0126	0.012	0.0246	0.002	0.0023	0.0043	0.0095	0.0151	0.0099	0.003	0.0375	0.0147	0.0953
Jambi	Kerinci	150100	0.0062	0.0061	0.0123	0.0051	0.0023	0.0074	0.0054	0.0251	0.0025	0.003	0.036	0.0147	0.0754
Jambi	Tanjung Jabung Timur	150500	0.0031	0.012	0.0151	0.0031	0.0037	0.0068	0.0054	0.0151	0.0099	0.0043	0.0347	0.0147	0.0785
Jambi	Tebo	150200	0.0062	0.0008	0.007	0.002	0.0059	0.0079	0.0054	0.007	0.0051	0.003	0.0205	0.0147	0.0503
Jawa Barat	Bandung	320600	0.0062	0.003	0.0092	0.0083	0.0023	0.0106	0.0095	0.0151	0.0025	0.003	0.0301	0.0147	0.0697
Jawa Barat	Bekasi	321801	0.0126	0.012	0.0246	0.0083	0.0037	0.012	0.0054	0.007	0.0025	0.003	0.0179	0.0147	0.0911
Jawa Barat	Bogor	320300	0.0062	0.012	0.0182	0.0083	0.0023	0.0106	0.0095	0.0151	0.0099	0.003	0.0375	0.0046	0.0951
Jawa Barat	Ciamis	320900	0.0016	0.0015	0.0031	0.002	0.0009	0.0029	0.0054	0.0034	0.0025	0.003	0.0143	0.0046	0.0263
Jawa Barat	Cianjur	320500	0.0126	0.003	0.0156	0.0051	0.0023	0.0074	0.0054	0.0151	0.0025	0.003	0.026	0.0147	0.072
Jawa Barat	Cirebon	321100	0.0126	0.003	0.0156	0.0083	0.0023	0.0106	0.0054	0.0151	0.0025	0.003	0.026	0.0046	0.0784
Jawa Barat	Garut	320700	0.0062	0.0061	0.0123	0.0031	0.0009	0.004	0.0095	0.0151	0.0025	0.003	0.0301	0.0147	0.0627
Jawa Barat	Indramayu	321400	0.0126	0.012	0.0246	0.0083	0.0023	0.0106	0.0165	0.0251	0.0025	0.003	0.0471	0.0147	0.1175
Jawa Barat	Karawang	321700	0.0126	0.0061	0.0187	0.0051	0.0037	0.0088	0.0165	0.0151	0.0006	0.003	0.0352	0.0147	0.0902
Jawa Barat	Kuningan	321000	0.0031	0.003	0.0061	0.002	0.0009	0.0029	0.0165	0.0251	0.0025	0.003	0.0471	0.0147	0.0651
Jawa Barat	Purwakarta	321600	0.0126	0.012	0.0246	0.0083	0.0014	0.0097	0.0165	0.0151	0.0051	0.0043	0.041	0.0147	0.1096
Jawa Barat	Subang	321500	0.0031	0.0061	0.0092	0.0031	0.0014	0.0045	0.0054	0.007	0.0025	0.003	0.0179	0.0147	0.0453
Jawa Barat	Sukabumi	320400	0.0031	0.0061	0.0092	0.0083	0.0023	0.0106	0.0024	0.007	0.0099	0.0043	0.0236	0.0147	0.0632
Jawa Barat	Sumedang	321300	0.0126	0.012	0.0246	0.0051	0.0009	0.006	0.0165	0.0151	0.0025	0.003	0.0371	0.0046	0.0983
Jawa Barat	Tasikmalaya	320800	0.0062	0.012	0.0182	0.0031	0.0009	0.004	0.0165	0.0151	0.0099	0.003	0.0445	0.0147	0.0889
Jawa Tengah	Banyumas	330200	0.0062	0.012	0.0182	0.0031	0.0009	0.004	0.0054	0.0151	0.0025	0.003	0.026	0.0147	0.0704
Jawa Tengah	Boyolali	330900	0.0062	0.003	0.0092	0.002	0.0009	0.0029	0.0054	0.007	0.0025	0.003	0.0179	0.0147	0.0421
Jawa Tengah	Cilacap	330100	0.0126	0.0061	0.0187	0.0083	0.0014	0.0097	0.0054	0.0151	0.0012	0.0043	0.026	0.0147	0.0828
Jawa Tengah	Jepara	332000	0.0062	0.003	0.0092	0.0031	0.0023	0.0054	0.0054	0.007	0.0006	0.003	0.016	0.0147	0.0452
Jawa Tengah	Karanganyar	331300	0.0062	0.012	0.0182	0.0051	0.0009	0.006	0.0054	0.007	0.0051	0.003	0.0205	0.0147	0.0689
Jawa Tengah	Kebumen	330500	0.0062	0.003	0.0092	0.0031	0.0014	0.0045	0.0054	0.0151	0.0025	0.003	0.026	0.0147	0.0534
Jawa Tengah	Kendal	332400	0.0062	0.003	0.0092	0.0051	0.0009	0.006	0.0054	0.007	0.0025	0.003	0.0179	0.0147	0.0483
Jawa Tengah	Klaten	331000	0.0031	0.003	0.0061	0.0083	0.0009	0.0092	0.0024	0.0034	0.0025	0.003	0.0113	0.0147	0.0419
Jawa Tengah	Kudus	331900	0.0126	0.012	0.0246	0.0031	0.0023	0.0054	0.0165	0.0151	0.0051	0.003	0.0397	0.0046	0.0997
Jawa Tengah	Magelang	330800	0.0062	0.003	0.0092	0.0083	0.0023	0.0106	0.0165	0.0151	0.0051	0.003	0.0397	0.0147	0.0793
Jawa Tengah	Pekalongan	332600	0.0062	0.012	0.0182	0.0051	0.0014	0.0065	0.0095	0.0151	0.0025	0.003	0.0301	0.0147	0.0795
Jawa Tengah	Pemalang	332700	0.0062	0.0015	0.0077	0.0031	0.0009	0.004	0.0095	0.0251	0.0006	0.003	0.0382	0.0147	0.0616
Jawa Tengah	Sukoharjo	331100	0.0062	0.003	0.0092	0.0083	0.0009	0.0092	0.0054	0.0034	0.0051	0.003	0.0169	0.0147	0.0537
Jawa Tengah	Tegal	332800	0.0062	0.0015	0.0077	0.0031	0.0023	0.0054	0.0054	0.0151	0.0006	0.003	0.0241	0.0147	0.0503
Jawa Tengah	Wonosobo	330700	0.0126	0.0061	0.0187	0.002	0.0014	0.0034	0.0054	0.007	0.0025	0.003	0.0179	0.0147	0.0621
Jawa Timur	Bangkalan	352600	0.0062	0.003	0.0092	0.0031	0.0014	0.0045	0.0095	0.007	0.0051	0.003	0.0246	0.0147	0.052
Jawa Timur	Banyuwangi	351000	0.0031	0.003	0.0061	0.0051	0.0014	0.0065	0.0054	0.007	0.0025	0.003	0.0179	0.0147	0.0431
Jawa Timur	Blitar	350500	0.0062	0.012	0.0182	0.0051	0.0009	0.006	0.0165	0.007	0.0025	0.003	0.029	0.0046	0.0774
Jawa Timur	Bondowoso	351100	0.0062	0.0061	0.0123	0.0051	0.0009	0.006	0.0095	0.0151	0.0051	0.003	0.0327	0.0046	0.0693
Jawa Timur	Gresik	352500	0.0062	0.003	0.0092	0.0132	0.0014	0.0146	0.0054	0.007	0.0025	0.0043	0.0192	0.0147	0.0668
Jawa Timur	Jember	350900	0.0016	0.003	0.0046	0.0031	0.0023	0.0054	0.0024	0.0034	0.0025	0.003	0.0113	0.0147	0.0313
Jawa Timur	Jombang	351700	0.0126	0.0008	0.0134	0.0051	0.0023	0.0074	0.0165	0.0151	0.0025	0.003	0.0371	0.0147	0.0787
Jawa Timur	Kediri	350600	0.0031	0.003	0.0061	0.0051	0.0014	0.0065	0.0054	0.007	0.0051	0.003	0.0205	0.0147	0.0457
Jawa Timur	Lamongan	352400	0.0126	0.003	0.0156	0.0051	0.0014	0.0065	0.0054	0.0151	0.0051	0.0072	0.0328	0.0046	0.077
Jawa Timur	Magetan	352000	0.0062	0.003	0.0092	0.0051	0.0014	0.0065	0.0095	0.0151	0.0051	0.003	0.0327	0.0147	0.0641
Jawa Timur	Mojokerto	351600	0.0126	0.0061	0.0187	0.0083	0.0023	0.0106	0.0095	0.0151	0.0025	0.003	0.0301	0.0046	0.0887
Jawa Timur	Pamekasan	352800	0.0126	0.003	0.0156	0.0031	0.0014	0.0045	0.0165	0.0151	0.0025	0.003	0.0371	0.0046	0.0773
Jawa Timur	Pasuruan	351400	0.0062	0.003	0.0092	0.0132	0.0023	0.0155	0.0054	0.0151	0.0012	0.003	0.0247	0.0147	0.0741
Jawa Timur	Ponorogo	350200	0.0062	0.0061	0.0123	0.0051	0.0014	0.0065	0.0024	0.0034	0.0051	0.003	0.0139	0.0147	0.0515
Jawa Timur	Sidoarjo	351500	0.0126	0.003	0.0156	0.0051	0.0023	0.0074	0.0054	0.0034	0.0025	0.0072	0.0185	0.0147	0.0645
Jawa Timur	Situbondo	351200	0.0016	0.0061	0.0077	0.0083	0.0023	0.0106	0.0054	0.007	0.0025	0.003	0.0179	0.0046	0.0545
Jawa Timur	Tulungagung	350400	0.0031	0.003	0.0061	0.0051	0.0014	0.0065	0.0095	0.0151	0.0025	0.003	0.0301	0.0147	0.0553
Kalimantan Barat	Kapuas Hulu	610600	0.0062	0.0015	0.0077	0.002	0.0037	0.0057	0.0024	0.007	0.0006	0.003	0.013	0.0046	0.0398
Kalimantan Barat	Ketapang	610400	0.0031	0.003	0.0061	0.0051	0.0059	0.011	0.0054	0.0151	0.0012	0.003	0.0247	0.0147	0.0589
Kalimantan Barat	Pontianak	610200	0.0031	0.003	0.0061	0.0132	0.0014	0.0146	0.0054	0.007	0.0006	0.003	0.016	0.0046	0.0574
Kalimantan Barat	Sambas	610100	0.0062	0.003	0.0092	0.0031	0.0023	0.0054	0.0165	0.0151	0.0025	0.003	0.0371	0.0147	0.0663
Kalimantan Barat	Sanggau	610300	0.0062	0.003	0.0092	0.0051	0.0023	0.0074	0.0054	0.007	0.0012	0.003	0.0166	0.0147	0.0498
Kalimantan Selatan	Hulu Sungai Selatan	630600	0.0126	0.012	0.0246	0.002	0.0023	0.0043	0.0095	0.0151	0.0051	0.003	0.0327	0.0147	0.0905
Kalimantan Selatan	Hulu Sungai Tengah	630700	0.0126	0.0061	0.0187	0.0051	0.0023	0.0074	0.0095	0.0151	0.0051	0.003	0.0327	0.0046	0.0849
Kalimantan Selatan	Hulu Sungai Utara	630800	0.0126	0.0061	0.0187	0.0051	0.0023	0.0074	0.0054	0.007	0.0051	0.003	0.0205	0.0147	0.0727
Kalimantan Selatan	Tabalong	630900	0.0126	0.003	0.0156	0.0132	0.0023	0.0155	0.0095	0.0151	0.0051	0.003	0.0327	0.0147	0.0949
Kalimantan Selatan	Tanah Laut	630100	0.0062	0.0061	0.0123	0.0051	0.0023	0.0074	0.0165	0.007	0.0099	0.003	0.0364	0.0046	0.0758
Kalimantan Selatan	Tapin	630500	0.0062	0.003	0.0092	0.0083	0.0014	0.0097	0.0054	0.0034	0.0099	0.003	0.0217	0.0147	0.0595
Kalimantan Tengah	Barito Selatan	620400	0.0062	0.003	0.0092	0.0051	0.0059	0.011	0.0095	0.007	0.0025	0.003	0.022	0.0046	0.0624
Kalimantan Tengah	Barito Utara	620500	0.0126	0.0061	0.0187	0.0051	0.0059	0.011	0.0095	0.0151	0.0099	0.0072	0.0417	0.0147	0.1011
Kalimantan Tengah	Kapuas	620300	0.0016	0.0015	0.0031	0.0051	0.0023	0.0074	0.0054	0.0151	0.0025	0.003	0.026	0.0147	0.047
Kalimantan Timur	Berau	640300	0.0062	0.0015	0.0077	0.0083	0.0059	0.0142	0.0024	0.0018	0.0006	0.003	0.0078	0.0147	0.0516
Kalimantan Timur	Bulungan	640400	0.0126	0.0061	0.0187	0.0051	0.0059	0.011	0.0054	0.0151	0.0025	0.003	0.026	0.0147	0.0854
Kalimantan Timur	Kutai	640200	0.0126	0.003	0.0156	0.0083	0.0059	0.0142	0.0054	0.007	0.0025	0.003	0.0179	0.0147	0.0775
Kalimantan Timur	Kutai Timur	640200	0.0062	0.0061	0.0123	0.0083	0.0059	0.0142	0.0054	0.007	0.0025	0.003	0.0179	0.0147	0.0709
Kalimantan Timur	Nunukan	640400	0.0126	0.0061	0.0187	0.0051	0.0059	0.011	0.0095	0.0251	0.0025	0.003	0.0401	0.0046	0.0995
Kalimantan Timur	Pasir	640100	0.0126	0.0008	0.0134	0.0083	0.0059	0.0142	0.0095	0.007	0.0025	0.003	0.022	0.0046	0.0772
Lampung	Lampung Barat	180302	0.0126	0.0061	0.0187	0.0083	0.0037	0.012	0.0165	0.0151	0.0025	0.0072	0.0413	0.0147	0.1027
Lampung	Lampung Selatan	180101	0.0016	0.003	0.0046	0.0051	0.0014	0.0065	0.0024	0.007	0.0025	0.003	0.0149	0.0046	0.0371
Lampung	Lampung Timur	180200	0.0062	0.0061	0.0123	0.0051	0.0009	0.006	0.0054	0.007	0.0051	0.003	0.0205	0.0147	0.0571
Lampung	Lampung Utara	180300	0.0016	0.012	0.0136	0.0051	0.0023	0.0074	0.0012	0.0034	0.0051	0.003	0.0127	0.0147	0.0547
Lampung	Way Kanan	180300	0.0126	0.012	0.0246	0.0051	0.0059	0.011	0.0165	0.0151	0.0099	0.003	0.0445	0.0147	0.1157
Nusa Tenggara Barat	Bima	520600	0.0126	0.0061	0.0187	0.0083	0.0014	0.0097	0.0165	0.0151	0.0025	0.003	0.0371	0.0046	0.0939
Nusa Tenggara Barat	Dompu	520500	0.0126	0.003	0.0156	0.0051	0.0023	0.0074	0.0054	0.007	0.0025	0.0015	0.0164	0.0046	0.0624
Nusa Tenggara Barat	Lombok Barat	520101	0.0062	0.012	0.0182	0.0132	0.0014	0.0146	0.0054	0.007	0.0099	0.0015	0.0238	0.0147	0.0894
Nusa Tenggara Barat	Lombok Timur	520300	0.0062	0.003	0.0092	0.002	0.0023	0.0043	0.0054	0.007	0.0025	0.003	0.0179	0.0147	0.0449
Nusa Tenggara Timur	Belu	530600	0.0126	0.012	0.0246	0.0083	0.0023	0.0106	0.0165	0.0151	0.0051	0.003	0.0397	0.0147	0.1101
Nusa Tenggara Timur	Ende	531000	0.0062	0.0061	0.0123	0.0031	0.0014	0.0045	0.0165	0.0251	0.0025	0.003	0.0471	0.0147	0.0807
Nusa Tenggara Timur	Flores Timur	530800	0.0062	0.003	0.0092	0.0051	0.0023	0.0074	0.0095	0.0151	0.0025	0.0015	0.0286	0.0147	0.0618
Nusa Tenggara Timur	Manggarai	531200	0.0126	0.0015	0.0141	0.0031	0.0023	0.0054	0.0054	0.007	0.0025	0.0072	0.0221	0.0046	0.0611
Nusa Tenggara Timur	Ngada	531100	0.0062	0.003	0.0092	0.002	0.0023	0.0043	0.0024	0.0034	0.0025	0.003	0.0113	0.0147	0.0383
Nusa Tenggara Timur	Sumba Barat	530100	0.0126	0.003	0.0156	0.0031	0.0023	0.0054	0.0165	0.0034	0.0012	0.003	0.0241	0.0147	0.0661
Nusa Tenggara Timur	Timur Tengah Selatan	530400	0.0062	0.003	0.0092	0.0031	0.0037	0.0068	0.0054	0.007	0.0025	0.003	0.0179	0.0147	0.0499
Nusa Tenggara Timur	Timur Tengah Utara	530500	0.0126	0.012	0.0246	0.0031	0.0037	0.0068	0.0095	0.0151	0.0099	0.003	0.0375	0.0147	0.1003
Papua	Fak-Fak	820500	0.0062	0.003	0.0092	0.0083	0.0023	0.0106	0.0012	0.007	0.0025	0.0007	0.0114	0.0046	0.051
Papua	Jayawijaya	820200	0.0016	0.0061	0.0077	0.0051	0.0037	0.0088	0.0012	0.007	0.0025	0.003	0.0137	0.0147	0.0467
Papua	Manokwari	820700	0.0062	0.012	0.0182	0.0051	0.0059	0.011	0.0054	0.0151	0.0051	0.003	0.0286	0.0046	0.087
Papua	Mimika	820500	0.0031	0.003	0.0061	0.0132	0.0037	0.0169	0.0012	0.0018	0.0025	0.003	0.0085	0.0046	0.0545
Papua	Sorong	820600	0.0062	0.0008	0.007	0.002	0.0023	0.0043	0.0012	0.0034	0.0006	0.0007	0.0059	0.0147	0.0285
Riau	Bengkalis	140500	0.0016	0.0008	0.0024	0.0132	0.0059	0.0191	0.0024	0.0034	0.0025	0.003	0.0113	0.0147	0.0543
Riau	Indragiri Hilir	140200	0.0031	0.0015	0.0046	0.002	0.0059	0.0079	0.0054	0.007	0.0006	0.003	0.016	0.0147	0.041
Riau	Kampar	140400	0.0126	0.003	0.0156	0.0051	0.0059	0.011	0.0095	0.0151	0.0025	0.0015	0.0286	0.0147	0.0818
Riau	Kuantan Singingi	140100	0.0062	0.0015	0.0077	0.002	0.0059	0.0079	0.0054	0.007	0.0012	0.0043	0.0179	0.0147	0.0491
Riau	Pelalawan	140400	0.0126	0.003	0.0156	0.0132	0.0059	0.0191	0.0165	0.0251	0.0051	0.003	0.0497	0.0046	0.1191
Riau	Rokan Hulu	140400	0.0062	0.0061	0.0123	0.002	0.0059	0.0079	0.0054	0.007	0.0051	0.003	0.0205	0.0046	0.0609
Sulawesi Selatan	Bantaeng	730300	0.0062	0.012	0.0182	0.0031	0.0037	0.0068	0.0054	0.0151	0.0051	0.003	0.0286	0.0147	0.0786
Sulawesi Selatan	Barru	731000	0.0062	0.012	0.0182	0.0051	0.0037	0.0088	0.0165	0.007	0.0051	0.003	0.0316	0.0147	0.0856
Sulawesi Selatan	Bone	731100	0.0126	0.0061	0.0187	0.002	0.0009	0.0029	0.0095	0.0151	0.0025	0.003	0.0301	0.0217	0.0733
Sulawesi Selatan	Enrekang	731600	0.0031	0.0061	0.0092	0.0051	0.0023	0.0074	0.0054	0.007	0.0051	0.003	0.0205	0.0147	0.0537
Sulawesi Selatan	Gowa	730600	0.0126	0.012	0.0246	0.0083	0.0023	0.0106	0.0165	0.0151	0.0099	0.0043	0.0458	0.0147	0.1162
Sulawesi Selatan	Jeneponto	730400	0.0126	0.012	0.0246	0.0031	0.0023	0.0054	0.0095	0.0151	0.0051	0.003	0.0327	0.0147	0.0927
Sulawesi Selatan	Luwu	731700	0.0126	0.012	0.0246	0.002	0.0023	0.0043	0.0054	0.0151	0.0051	0.003	0.0286	0.0147	0.0864
Sulawesi Selatan	Luwu Utara	731700	0.0126	0.0061	0.0187	0.0132	0.0023	0.0155	0.0165	0.0151	0.0025	0.0072	0.0413	0.0147	0.1097
Sulawesi Selatan	Majene	732000	0.0126	0.003	0.0156	0.0051	0.0023	0.0074	0.0165	0.0151	0.0051	0.003	0.0397	0.0147	0.0857
Sulawesi Selatan	Maros	730800	0.0062	0.003	0.0092	0.0083	0.0023	0.0106	0.0054	0.007	0.0025	0.003	0.0179	0.0046	0.0575
Sulawesi Selatan	Pangkep	730900	0.0062	0.003	0.0092	0.0132	0.0037	0.0169	0.0054	0.007	0.0051	0.003	0.0205	0.0046	0.0727
Sulawesi Selatan	Pinrang	731500	0.0126	0.012	0.0246	0.0051	0.0023	0.0074	0.0165	0.0151	0.0099	0.0072	0.0487	0.0147	0.1127
Sulawesi Selatan	Selayar	730100	0.0062	0.012	0.0182	0.0051	0.0037	0.0088	0.0095	0.0151	0.0051	0.003	0.0327	0.0147	0.0867
Sulawesi Selatan	Sinjai	730700	0.0126	0.012	0.0246	0.002	0.0023	0.0043	0.0095	0.0251	0.0051	0.0072	0.0469	0.0147	0.1047
Sulawesi Selatan	Takalar	730500	0.0016	0.0008	0.0024	0.0031	0.0014	0.0045	0.0054	0.007	0.0012	0.003	0.0166	0.0217	0.0304
Sulawesi Selatan	Tana Toraja	731800	0.0062	0.003	0.0092	0.0051	0.0023	0.0074	0.0054	0.007	0.0051	0.003	0.0205	0.0147	0.0537
Sulawesi Tengah	Banggai	720100	0.0126	0.012	0.0246	0.0051	0.0023	0.0074	0.0165	0.0151	0.0099	0.003	0.0445	0.0147	0.1085
Sulawesi Tengah	Donggala	720300	0.0031	0.003	0.0061	0.0083	0.0009	0.0092	0.0054	0.0034	0.0099	0.003	0.0217	0.0147	0.0523
Sulawesi Tengah	Morowali	720200	0.0062	0.0008	0.007	0.0031	0.0037	0.0068	0.0054	0.0034	0.0025	0.003	0.0143	0.0147	0.0419
Sulawesi Tengah	Poso	720200	0.0126	0.003	0.0156	0.0031	0.0023	0.0054	0.0095	0.0151	0.0025	0.003	0.0301	0.0147	0.0721
Sulawesi Tengah	Toli-Toli	720400	0.0126	0.0015	0.0141	0.0132	0.0023	0.0155	0.0054	0.0151	0.0099	0.0048	0.0352	0.0147	0.0944
Sulawesi Tenggara	Buton	740100	0.0126	0.0061	0.0187	0.002	0.0023	0.0043	0.0054	0.0151	0.0025	0.003	0.026	0.0147	0.072
Sulawesi Tenggara	Kolaka	740400	0.0126	0.003	0.0156	0.0083	0.0023	0.0106	0.0165	0.0251	0.0025	0.0043	0.0484	0.0046	0.1008
Sulawesi Utara	Minahasa	710300	0.0031	0.0008	0.0039	0.0051	0.0009	0.006	0.0054	0.0034	0.0006	0.0015	0.0109	0.0046	0.0307
Sulawesi Utara	Sangihe	710400	0.0031	0.003	0.0061	0.002	0.0009	0.0029	0.0095	0.0251	0.0025	0.003	0.0401	0.0046	0.0581
Sumatera Barat	Pasaman	130800	0.0031	0.0061	0.0092	0.0031	0.0037	0.0068	0.0024	0.007	0.0051	0.003	0.0175	0.0046	0.0495
Sumatera Barat	Pesisir Selatan	130100	0.0062	0.003	0.0092	0.002	0.0014	0.0034	0.0024	0.0034	0.0099	0.003	0.0187	0.0147	0.0439
Sumatera Barat	Sawah Lunto Sijunjung	130300	0.0062	0.003	0.0092	0.0051	0.0023	0.0074	0.0054	0.007	0.0025	0.003	0.0179	0.0147	0.0511
Sumatera Barat	Solok	130200	0.0248	0.012	0.0368	0.0051	0.0023	0.0074	0.0054	0.007	0.0051	0.003	0.0205	0.0147	0.1089
Sumatera Selatan	Lahat	160400	0.0031	0.003	0.0061	0.0051	0.0014	0.0065	0.0054	0.007	0.0051	0.003	0.0205	0.0147	0.0457
Sumatera Selatan	Muara Enim	160300	0.0126	0.003	0.0156	0.0132	0.0023	0.0155	0.0054	0.007	0.0012	0.003	0.0166	0.0147	0.0788
Sumatera Selatan	Musi Banyuasin	160600	0.0062	0.0061	0.0123	0.0132	0.0059	0.0191	0.0095	0.0151	0.0025	0.0072	0.0343	0.0217	0.0971
Sumatera Selatan	Musi Rawas	160500	0.0016	0.0008	0.0024	0.0031	0.0059	0.009	0.0012	0.0018	0.0006	0.0015	0.0051	0.0046	0.0279
Sumatera Selatan	Ogan Komiring Ilir	160200	0.0016	0.0015	0.0031	0.0051	0.0037	0.0088	0.0024	0.0034	0.0006	0.003	0.0094	0.0147	0.0332
Sumatera Utara	Asahan	120600	0.0062	0.012	0.0182	0.0132	0.0023	0.0155	0.0165	0.0151	0.0012	0.0043	0.0371	0.0147	0.1045
Sumatera Utara	Dairi	120800	0.0126	0.012	0.0246	0.0031	0.0023	0.0054	0.0095	0.007	0.0025	0.003	0.022	0.0147	0.082
Sumatera Utara	Deli Serdang	121000	0.0126	0.003	0.0156	0.0083	0.0014	0.0097	0.0054	0.007	0.0006	0.003	0.016	0.0046	0.0666
Sumatera Utara	Labuhan Batu	120500	0.0062	0.0061	0.0123	0.0083	0.0023	0.0106	0.0165	0.007	0.0012	0.003	0.0277	0.0046	0.0735
Sumatera Utara	Langkat	121100	0.0062	0.0061	0.0123	0.0051	0.0023	0.0074	0.0054	0.007	0.0025	0.003	0.0179	0.0147	0.0573
Sumatera Utara	Simalungun	120700	0.0031	0.003	0.0061	0.0083	0.0023	0.0106	0.0095	0.0151	0.0025	0.0072	0.0343	0.0147	0.0677
Sumatera Utara	Karo	120900	0.0031	0.003	0.0061	0.0051	0.0014	0.0065	0.0054	0.007	0.0012	0.003	0.0166	0.0147	0.0418
Sumatera Utara	Tapanuli Utara	120400	0.0062	0.003	0.0092	0.002	0.0023	0.0043	0.0095	0.0151	0.0099	0.0072	0.0417	0.0147	0.0687

## Sheet: socpol_04
prov_kppod_04	kab_kppod_04	kabID97	bus_sec_04	comm_sec_04	quickreply_04	part_comm_04	soc_conflict_04	pol_stab_04	demo_intens_04	open_comm_bus_04	nodiscr_04	soc_customs_04	comm_workethos_04	tot_socpol_04	subtot_sec_04	subtot_socpol_04	subtot_soccul_04
Bali	Kota Denpasar	510302	0.0062	0.0036	0.0102	0.0023	0.0095	0.0116	0.0049	0.0003	0.0004	0.0012	0.0019	0.0521	0.02	0.0283	0.0038
Bangka Belitung	Kota Pangkal Pinang	167200	0.0062	0.0036	0.0214	0.003	0.0095	0.0116	0.0049	0.0041	0.0009	0.0005	0.0009	0.0666	0.0312	0.029	0.0064
Banten	Kota Cilegon	322000	0.0153	0.008	0.0102	0.003	0.0095	0.0094	0.0049	0.0025	0.0031	0.0032	0.004	0.0731	0.0335	0.0268	0.0128
Banten	Kota Tangerang	321902	0.002	0.0012	0.0048	0.0023	0.0095	0.0116	0.0049	0.0006	0.0004	0.0005	0.0009	0.0387	0.008	0.0283	0.0024
Bengkulu	Kota Bengkulu	177100	0.0034	0.0012	0.0025	0.003	0.0095	0.0116	0.0049	0.0003	0.0004	0.0005	0.0009	0.0382	0.0071	0.029	0.0021
DI Yogyakarta	Kota Yogyakarta	347100	0.0062	0.0036	0.0102	0.003	0.0095	0.0116	0.0049	0.0012	0.0018	0.0032	0.0019	0.0571	0.02	0.029	0.0081
DKI Jakarta	Kota Jakarta	#N/A	0.002	0.0012	0.0102	0.0037	0.0095	0.0116	0.0025	0.0025	0.0031	0.0003	0.0067	0.0533	0.0134	0.0273	0.0126
Gorontalo	Kota Gorontalo	717100	0.0062	0.0036	0.0214	0.0037	0.0095	0.0116	0.0049	0.0025	0.0031	0.0032	0.004	0.0737	0.0312	0.0297	0.0128
Jambi	Kota Jambi	157100	0.0062	0.0036	0.0214	0.003	0.0095	0.0116	0.0049	0.0012	0.0004	0.002	0.0009	0.0647	0.0312	0.029	0.0045
Jawa Barat	Kota Bandung	327300	0.002	0.0012	0.0048	0.003	0.0095	0.0116	0.0025	0.0006	0.0018	0.0012	0.0019	0.0401	0.008	0.0266	0.0055
Jawa Barat	Kota Bekasi	321802	0.002	0.0012	0.0102	0.003	0.0095	0.0116	0.0049	0.0003	0.0004	0.0012	0.0009	0.0452	0.0134	0.029	0.0028
Jawa Barat	Kota Bogor	327100	0.0062	0.0036	0.0214	0.0037	0.0024	0.0048	0.0003	0.0012	0.0018	0.002	0.0019	0.0493	0.0312	0.0112	0.0069
Jawa Barat	Kota Cirebon	327400	0.0034	0.0012	0.0048	0.003	0.0095	0.0116	0.0049	0.0006	0.0002	0.0005	0.0005	0.0402	0.0094	0.029	0.0018
Jawa Barat	Kota Sukabumi	327200	0.0034	0.0012	0.0025	0.003	0.0095	0.0116	0.0049	0.0012	0.0009	0.0012	0.0019	0.0413	0.0071	0.029	0.0052
Jawa Tengah	Kota Pekalongan	337500	0.0062	0.008	0.0102	0.0037	0.0095	0.0094	0.0049	0.0025	0.0018	0.0012	0.0067	0.0641	0.0244	0.0275	0.0122
Jawa Tengah	Kota Semarang	337400	0.0034	0.0036	0.0102	0.0037	0.0095	0.0116	0.0049	0.0012	0.0009	0.0012	0.0019	0.0521	0.0172	0.0297	0.0052
Jawa Tengah	Kota Surakarta	337200	0.0062	0.0036	0.0102	0.003	0.0095	0.0048	0.0025	0.0003	0.0004	0.0012	0.0019	0.0436	0.02	0.0198	0.0038
Jawa Tengah	Kota Tegal	337600	0.0153	0.008	0.0102	0.003	0.0095	0.0116	0.0049	0.0025	0.0018	0.002	0.0067	0.0755	0.0335	0.029	0.013
Jawa Timur	Kota Kediri	357100	0.0034	0.0021	0.0214	0.0023	0.0095	0.0116	0.0049	0.0012	0.0009	0.0032	0.004	0.0645	0.0269	0.0283	0.0093
Jawa Timur	Kota Madiun	357700	0.0062	0.0036	0.0214	0.0023	0.0095	0.0116	0.0049	0.0041	0.0004	0.0003	0.004	0.0683	0.0312	0.0283	0.0088
Jawa Timur	Kota Malang	357300	0.0153	0.0036	0.0102	0.003	0.0095	0.0116	0.0049	0.0012	0.0031	0.0032	0.0019	0.0675	0.0291	0.029	0.0094
Jawa Timur	Kota Mojokerto	357600	0.0254	0.0036	0.0102	0.003	0.0095	0.0116	0.0049	0.0041	0.0031	0.0032	0.004	0.0826	0.0392	0.029	0.0144
Jawa Timur	Kota Probolinggo	357400	0.0062	0.0012	0.0048	0.003	0.0095	0.0116	0.0049	0.0012	0.0018	0.0012	0.004	0.0494	0.0122	0.029	0.0082
Jawa Timur	Kota Surabaya	357800	0.0062	0.0021	0.0102	0.0023	0.0024	0.0116	0.0012	0.0012	0.0009	0.002	0.0019	0.042	0.0185	0.0175	0.006
Kalimantan Barat	Kota Pontianak	617100	0.002	0.0021	0.0214	0.003	0.0095	0.0116	0.0049	0.0012	0.0018	0.002	0.0019	0.0614	0.0255	0.029	0.0069
Kalimantan Selatan	Kota Banjarmasin	637100	0.0062	0.0036	0.0102	0.003	0.0095	0.0116	0.0049	0.0003	0.0002	0.0012	0.0019	0.0526	0.02	0.029	0.0036
Kalimantan Tengah	Kota Palangkaraya	627100	0.0034	0.0012	0.0048	0.0023	0.0095	0.0116	0.0049	0.0012	0.0009	0.0003	0.0019	0.042	0.0094	0.0283	0.0043
Kalimantan Timur	Kota Balikpapan	647100	0.0153	0.008	0.0102	0.0037	0.0095	0.0094	0.0025	0.0025	0.0018	0.002	0.0019	0.0668	0.0335	0.0251	0.0082
Kalimantan Timur	Kota Samarinda	647200	0.002	0.0012	0.0102	0.0037	0.0095	0.0094	0.0012	0.0003	0.0002	0.0012	0.0009	0.0398	0.0134	0.0238	0.0026
Lampung	Kota Bandar Lampung	187100	0.0062	0.0036	0.0048	0.003	0.0095	0.0116	0.0049	0.0012	0.0009	0.0012	0.004	0.0509	0.0146	0.029	0.0073
Nusa Tenggara Barat	Kota Mataram	520102	0.0153	0.008	0.0048	0.003	0.0095	0.0094	0.0049	0.0025	0.0018	0.0012	0.0019	0.0623	0.0281	0.0268	0.0074
Nusa Tenggara Timur	Kota Kupang	530302	0.0062	0.0036	0.0048	0.003	0.0095	0.0094	0.0025	0.0012	0.0009	0.002	0.0019	0.045	0.0146	0.0244	0.006
Papua	Kota Jayapura	820302	0.0034	0.0012	0.0095	0.0017	0.0095	0.0116	0.0025	0.0003	0.0002	0.0003	0.0009	0.0411	0.0141	0.0253	0.0017
Papua	Kota Sorong	820600	0.0062	0.0036	0.0095	0.0037	0.0024	0.0094	0.0012	0.0006	0.0002	0.0003	0.0005	0.0376	0.0193	0.0167	0.0016
Riau	Kota Batam	147200	0.0062	0.0036	0.0102	0.0023	0.0024	0.0094	0.0025	0.0025	0.0009	0.0012	0.0067	0.0479	0.02	0.0166	0.0113
Riau	Kota Dumai	140500	0.0062	0.0021	0.0102	0.0037	0.0095	0.0116	0.0049	0.0012	0.0009	0.0012	0.004	0.0555	0.0185	0.0297	0.0073
Riau	Kota Pekanbaru	147100	0.0062	0.0036	0.0102	0.0037	0.0095	0.0094	0.0049	0.0012	0.0004	0.0012	0.0009	0.0512	0.02	0.0275	0.0037
Riau	Kota Tanjung Pinang	140300	0.0034	0.0021	0.0214	0.003	0.0095	0.0116	0.0049	0.0012	0.0018	0.0032	0.004	0.0661	0.0269	0.029	0.0102
Sulawesi Selatan	Kota Makasar	737100	0.0062	0.0036	0.0102	0.0023	0.0095	0.0116	0.0025	0.0025	0.0018	0.0032	0.0067	0.0601	0.02	0.0259	0.0142
Sulawesi Selatan	Kota Pare-Pare	737200	0.0254	0.008	0.0102	0.0023	0.0095	0.0116	0.0049	0.0003	0.0031	0.0032	0.004	0.0825	0.0436	0.0283	0.0106
Sulawesi Tengah	Kota Palu	720302	0.0062	0.0012	0.0025	0.003	0.0048	0.0116	0.0049	0.0006	0.0002	0.0003	0.0009	0.0362	0.0099	0.0243	0.002
Sulawesi Tenggara	Kota Kendari	740302	0.0062	0.0021	0.0025	0.003	0.0095	0.0116	0.0025	0.0012	0.0004	0.0012	0.0019	0.0421	0.0108	0.0266	0.0047
Sulawesi Utara	Kota Bitung	710302	0.0034	0.0036	0.0102	0.003	0.0095	0.0116	0.0049	0.0025	0.0018	0.0005	0.0019	0.0529	0.0172	0.029	0.0067
Sulawesi Utara	Kota Manado	717200	0.0062	0.0036	0.0102	0.003	0.0095	0.0116	0.0049	0.0041	0.0031	0.0032	0.0067	0.0661	0.02	0.029	0.0171
Sumatera Barat	Kota Padang	137100	0.0062	0.0021	0.0102	0.003	0.0095	0.0116	0.0049	0.0012	0.0009	0.002	0.0019	0.0535	0.0185	0.029	0.006
Sumatera Barat	Kota Sawahlunto	130302	0.0062	0.008	0.0214	0.0037	0.0095	0.0116	0.0049	0.0012	0.0018	0.0012	0.0019	0.0714	0.0356	0.0297	0.0061
Sumatera Selatan	Kota Palembang	167100	0.0062	0.0021	0.0048	0.003	0.0095	0.0116	0.0049	0.0025	0.0018	0.0032	0.004	0.0536	0.0131	0.029	0.0115
Sumatera Utara	Kota Binjai	127600	0.002	0.0021	0.0102	0.0037	0.0095	0.0116	0.0049	0.0012	0.0009	0.002	0.0009	0.049	0.0143	0.0297	0.005
Sumatera Utara	Kota Medan	127500	0.0062	0.0036	0.0214	0.0023	0.0095	0.0116	0.0049	0.0012	0.0009	0.0012	0.0019	0.0647	0.0312	0.0283	0.0052
Sumatera Utara	Kota Pematang Siantar	127300	0.002	0.0012	0.0102	0.0023	0.0095	0.0116	0.0049	0.0012	0.0009	0.0005	0.0005	0.0448	0.0134	0.0283	0.0031
Sumatera Utara	Kota Sibolga	127100	0.002	0.0012	0.0102	0.0023	0.0095	0.0116	0.0049	0.0003	0.0002	0.0012	0.0009	0.0443	0.0134	0.0283	0.0026
Sumatera Utara	Kota Tanjung Balai	127200	0.0153	0.008	0.0102	0.0023	0.0095	0.0116	0.0049	0.0025	0.0009	0.0005	0.0009	0.0666	0.0335	0.0283	0.0048
Sumatera Utara	Kota Tebing Tinggi	127400	0.0153	0.008	0.0102	0.003	0.0095	0.0094	0.0049	0.0025	0.0018	0.0032	0.004	0.0718	0.0335	0.0268	0.0115
Bali	Badung	510301	0.0153	0.0036	0.0102	0.003	0.0095	0.0116	0.0049	0.0012	0.0018	0.002	0.0019	0.065	0.0291	0.029	0.0069
Bali	Bangli	510600	0.0153	0.008	0.0214	0.003	0.0095	0.0116	0.0049	0.0025	0.0018	0.0012	0.0019	0.0811	0.0447	0.029	0.0074
Bali	Buleleng	510800	0.0153	0.008	0.0102	0.003	0.0095	0.0116	0.0049	0.0025	0.0009	0.0012	0.0019	0.069	0.0335	0.029	0.0065
Bali	Gianyar	510400	0.0254	0.008	0.0102	0.003	0.0095	0.0116	0.0049	0.0012	0.0018	0.002	0.0019	0.0795	0.0436	0.029	0.0069
Bali	Jembrana	510100	0.0153	0.008	0.0102	0.003	0.0095	0.0116	0.0049	0.0012	0.0009	0.0012	0.0019	0.0677	0.0335	0.029	0.0052
Bali	Karangasem	510700	0.0062	0.0021	0.0214	0.003	0.0095	0.0116	0.0049	0.0025	0.0018	0.0012	0.0019	0.0661	0.0297	0.029	0.0074
Bali	Klungkung	510500	0.0153	0.0163	0.0102	0.003	0.0095	0.0116	0.0049	0.0025	0.0009	0.0012	0.0019	0.0773	0.0418	0.029	0.0065
Bali	Tabanan	510200	0.0062	0.0036	0.0048	0.003	0.0095	0.0116	0.0049	0.0025	0.0004	0.0003	0.0019	0.0487	0.0146	0.029	0.0051
Bangka Belitung	Bangka	160700	0.0153	0.008	0.0102	0.0023	0.0095	0.0116	0.0049	0.0041	0.0031	0.0005	0.0009	0.0704	0.0335	0.0283	0.0086
Bangka Belitung	Belitung	160700	0.0153	0.0036	0.0102	0.003	0.0095	0.0116	0.0049	0.0012	0.0009	0.002	0.0019	0.0641	0.0291	0.029	0.006
Banten	Lebak	320200	0.0062	0.0036	0.0102	0.003	0.0095	0.0116	0.0049	0.0012	0.0018	0.0012	0.0009	0.0541	0.02	0.029	0.0051
Banten	Serang	322000	0.0062	0.0036	0.0102	0.0037	0.0095	0.0116	0.0049	0.0003	0.0004	0.0003	0.0009	0.0516	0.02	0.0297	0.0019
Banten	Tangerang	321901	0.0062	0.0012	0.0025	0.0037	0.0095	0.0116	0.0049	0.0012	0.0009	0.0012	0.0019	0.0448	0.0099	0.0297	0.0052
Bengkulu	Bengkulu Selatan	170100	0.0062	0.0036	0.0025	0.003	0.0095	0.0116	0.0049	0.0025	0.0004	0.0012	0.004	0.0494	0.0123	0.029	0.0081
Bengkulu	Bengkulu Utara	170300	0.0153	0.0036	0.0102	0.003	0.0095	0.0116	0.0049	0.0025	0.0031	0.0032	0.0019	0.0688	0.0291	0.029	0.0107
Bengkulu	Rejang Lebong	170200	0.0034	0.0036	0.0025	0.003	0.0095	0.0116	0.0049	0.0012	0.0009	0.0012	0.0019	0.0437	0.0095	0.029	0.0052
DI Yogyakarta	Bantul	340200	0.0062	0.0036	0.0102	0.003	0.0095	0.0116	0.0049	0.0025	0.0009	0.002	0.0019	0.0563	0.02	0.029	0.0073
DI Yogyakarta	Gunung Kidul	340300	0.0153	0.008	0.0102	0.0023	0.0095	0.0116	0.0049	0.0025	0.0031	0.0012	0.004	0.0726	0.0335	0.0283	0.0108
Gorontalo	Gorontalo	710100	0.0062	0.0036	0.0214	0.0023	0.0095	0.0116	0.0049	0.0025	0.0031	0.0032	0.0019	0.0702	0.0312	0.0283	0.0107
Jambi	Batanghari	150400	0.0062	0.0036	0.0214	0.003	0.0095	0.0116	0.0049	0.0012	0.0004	0.0003	0.0009	0.063	0.0312	0.029	0.0028
Jambi	Bungo	150200	0.0153	0.0036	0.0102	0.003	0.0095	0.0116	0.0049	0.0012	0.0018	0.002	0.0019	0.065	0.0291	0.029	0.0069
Jambi	Kerinci	150100	0.0062	0.0036	0.0102	0.003	0.0095	0.0116	0.0025	0.0006	0.0009	0.0012	0.0067	0.056	0.02	0.0266	0.0094
Jambi	Tanjung Jabung Timur	150500	0.0062	0.008	0.0214	0.0037	0.0095	0.0116	0.0049	0.0012	0.0004	0.0012	0.0019	0.07	0.0356	0.0297	0.0047
Jambi	Tebo	150200	0.0254	0.008	0.0102	0.0037	0.0095	0.0116	0.0049	0.0012	0.0018	0.0012	0.0019	0.0794	0.0436	0.0297	0.0061
Jawa Barat	Bandung	320600	0.0062	0.0036	0.0102	0.0037	0.0095	0.0116	0.0049	0.0012	0.0004	0.0012	0.0019	0.0544	0.02	0.0297	0.0047
Jawa Barat	Bekasi	321801	0.0062	0.0036	0.0102	0.0037	0.0095	0.0116	0.0049	0.0012	0.0009	0.0012	0.0019	0.0549	0.02	0.0297	0.0052
Jawa Barat	Bogor	320300	0.0062	0.0036	0.0102	0.003	0.0095	0.0116	0.0049	0.0012	0.0004	0.0012	0.0019	0.0537	0.02	0.029	0.0047
Jawa Barat	Ciamis	320900	0.0153	0.008	0.0214	0.003	0.0095	0.0116	0.0049	0.0012	0.0018	0.0012	0.0019	0.0798	0.0447	0.029	0.0061
Jawa Barat	Cianjur	320500	0.0062	0.0036	0.0102	0.003	0.0095	0.0116	0.0049	0.0012	0.0018	0.0012	0.0019	0.0551	0.02	0.029	0.0061
Jawa Barat	Cirebon	321100	0.0153	0.0036	0.0102	0.0037	0.0095	0.0116	0.0049	0.0025	0.0031	0.002	0.0019	0.0683	0.0291	0.0297	0.0095
Jawa Barat	Garut	320700	0.0062	0.0036	0.0102	0.003	0.0095	0.0116	0.0049	0.0025	0.0018	0.0012	0.004	0.0585	0.02	0.029	0.0095
Jawa Barat	Indramayu	321400	0.0153	0.008	0.0214	0.003	0.0095	0.0116	0.0049	0.0012	0.0004	0.0012	0.0019	0.0784	0.0447	0.029	0.0047
Jawa Barat	Karawang	321700	0.0153	0.0036	0.0102	0.003	0.0095	0.0116	0.0049	0.0041	0.0031	0.002	0.004	0.0713	0.0291	0.029	0.0132
Jawa Barat	Kuningan	321000	0.0153	0.008	0.0102	0.003	0.0095	0.0116	0.0049	0.0012	0.0018	0.0012	0.0019	0.0686	0.0335	0.029	0.0061
Jawa Barat	Purwakarta	321600	0.0062	0.008	0.0102	0.003	0.0095	0.0116	0.0049	0.0012	0.0018	0.0012	0.0019	0.0595	0.0244	0.029	0.0061
Jawa Barat	Subang	321500	0.0153	0.0036	0.0102	0.003	0.0095	0.0116	0.0049	0.0025	0.0018	0.0012	0.004	0.0676	0.0291	0.029	0.0095
Jawa Barat	Sukabumi	320400	0.0062	0.0036	0.0025	0.003	0.0095	0.0116	0.0049	0.0003	0.0031	0.0032	0.0019	0.0498	0.0123	0.029	0.0085
Jawa Barat	Sumedang	321300	0.0153	0.008	0.0102	0.003	0.0095	0.0116	0.0049	0.0006	0.0009	0.002	0.004	0.07	0.0335	0.029	0.0075
Jawa Barat	Tasikmalaya	320800	0.0062	0.0036	0.0102	0.003	0.0095	0.0116	0.0049	0.0012	0.0009	0.0012	0.0019	0.0542	0.02	0.029	0.0052
Jawa Tengah	Banyumas	330200	0.0062	0.0036	0.0102	0.003	0.0095	0.0116	0.0049	0.0012	0.0018	0.0012	0.0019	0.0551	0.02	0.029	0.0061
Jawa Tengah	Boyolali	330900	0.0034	0.0021	0.0048	0.003	0.0095	0.0116	0.0049	0.0012	0.0018	0.0012	0.0019	0.0454	0.0103	0.029	0.0061
Jawa Tengah	Cilacap	330100	0.0034	0.0021	0.0102	0.003	0.0095	0.0116	0.0049	0.0012	0.0018	0.0012	0.0019	0.0508	0.0157	0.029	0.0061
Jawa Tengah	Jepara	332000	0.0062	0.0036	0.0102	0.0037	0.0095	0.0116	0.0049	0.0012	0.0018	0.002	0.0019	0.0566	0.02	0.0297	0.0069
Jawa Tengah	Karanganyar	331300	0.002	0.0036	0.0102	0.003	0.0095	0.0116	0.0049	0.0012	0.0018	0.0012	0.0019	0.0509	0.0158	0.029	0.0061
Jawa Tengah	Kebumen	330500	0.0062	0.0036	0.0102	0.003	0.0095	0.0116	0.0049	0.0012	0.0018	0.0012	0.0019	0.0551	0.02	0.029	0.0061
Jawa Tengah	Kendal	332400	0.0034	0.0036	0.0102	0.0037	0.0095	0.0094	0.0049	0.0012	0.0018	0.0012	0.0019	0.0508	0.0172	0.0275	0.0061
Jawa Tengah	Klaten	331000	0.0062	0.0036	0.0102	0.003	0.0095	0.0116	0.0049	0.0012	0.0018	0.0012	0.0019	0.0551	0.02	0.029	0.0061
Jawa Tengah	Kudus	331900	0.0153	0.008	0.0102	0.0023	0.0095	0.0116	0.0025	0.0012	0.0018	0.002	0.004	0.0684	0.0335	0.0259	0.009
Jawa Tengah	Magelang	330800	0.0062	0.0036	0.0214	0.003	0.0095	0.0116	0.0049	0.0012	0.0018	0.0012	0.004	0.0684	0.0312	0.029	0.0082
Jawa Tengah	Pekalongan	332600	0.0062	0.008	0.0214	0.0023	0.0095	0.002	0.0049	0.0012	0.0018	0.0012	0.0019	0.0604	0.0356	0.0187	0.0061
Jawa Tengah	Pemalang	332700	0.0034	0.0021	0.0102	0.003	0.0095	0.0116	0.0049	0.0012	0.0018	0.002	0.0019	0.0516	0.0157	0.029	0.0069
Jawa Tengah	Sukoharjo	331100	0.0153	0.008	0.0214	0.003	0.0095	0.0116	0.0049	0.0012	0.0018	0.002	0.004	0.0827	0.0447	0.029	0.009
Jawa Tengah	Tegal	332800	0.0062	0.0021	0.0102	0.003	0.0095	0.0116	0.0049	0.0012	0.0018	0.0012	0.0019	0.0536	0.0185	0.029	0.0061
Jawa Tengah	Wonosobo	330700	0.0034	0.0021	0.0048	0.003	0.0095	0.0116	0.0049	0.0012	0.0018	0.0012	0.0019	0.0454	0.0103	0.029	0.0061
Jawa Timur	Bangkalan	352600	0.0034	0.0036	0.0102	0.003	0.0095	0.0116	0.0049	0.0025	0.0018	0.002	0.004	0.0565	0.0172	0.029	0.0103
Jawa Timur	Banyuwangi	351000	0.0062	0.0036	0.0102	0.003	0.0095	0.0116	0.0049	0.0012	0.0018	0.0012	0.0019	0.0551	0.02	0.029	0.0061
Jawa Timur	Blitar	350500	0.0062	0.0036	0.0214	0.0023	0.0095	0.0116	0.0049	0.0012	0.0004	0.0003	0.0019	0.0633	0.0312	0.0283	0.0038
Jawa Timur	Bondowoso	351100	0.0062	0.008	0.0102	0.003	0.0095	0.0116	0.0049	0.0012	0.0018	0.002	0.0019	0.0603	0.0244	0.029	0.0069
Jawa Timur	Gresik	352500	0.0153	0.0036	0.0102	0.003	0.0095	0.0116	0.0049	0.0025	0.0018	0.0005	0.0019	0.0648	0.0291	0.029	0.0067
Jawa Timur	Jember	350900	0.0034	0.0021	0.0048	0.003	0.0095	0.0116	0.0049	0.0012	0.0002	0.0005	0.0009	0.0421	0.0103	0.029	0.0028
Jawa Timur	Jombang	351700	0.0062	0.0036	0.0102	0.0023	0.0095	0.0116	0.0049	0.0025	0.0018	0.0032	0.004	0.0598	0.02	0.0283	0.0115
Jawa Timur	Kediri	350600	0.0062	0.0021	0.0214	0.0023	0.0095	0.0116	0.0049	0.0006	0.0004	0.0012	0.0019	0.0621	0.0297	0.0283	0.0041
Jawa Timur	Lamongan	352400	0.0153	0.0036	0.0102	0.003	0.0095	0.0116	0.0049	0.0025	0.0031	0.0012	0.004	0.0689	0.0291	0.029	0.0108
Jawa Timur	Magetan	352000	0.0254	0.008	0.0214	0.0023	0.0095	0.0116	0.0049	0.0025	0.0031	0.0012	0.0009	0.0908	0.0548	0.0283	0.0077
Jawa Timur	Mojokerto	351600	0.0062	0.0021	0.0048	0.0023	0.0095	0.0094	0.0012	0.0012	0.0031	0.0032	0.004	0.047	0.0131	0.0224	0.0115
Jawa Timur	Pamekasan	352800	0.0062	0.0036	0.0102	0.0023	0.0095	0.0116	0.0049	0.0025	0.0031	0.0032	0.004	0.0611	0.02	0.0283	0.0128
Jawa Timur	Pasuruan	351400	0.0062	0.0036	0.0102	0.0023	0.0095	0.0116	0.0025	0.0025	0.0031	0.0032	0.004	0.0587	0.02	0.0259	0.0128
Jawa Timur	Ponorogo	350200	0.0034	0.0036	0.0214	0.0023	0.0095	0.0116	0.0049	0.0012	0.0004	0.0012	0.0009	0.0604	0.0284	0.0283	0.0037
Jawa Timur	Sidoarjo	351500	0.0062	0.0036	0.0102	0.0037	0.0095	0.0116	0.0005	0.0012	0.0009	0.0012	0.0067	0.0553	0.02	0.0253	0.01
Jawa Timur	Situbondo	351200	0.0062	0.0036	0.0102	0.003	0.0095	0.0116	0.0049	0.0003	0.0002	0.0005	0.0019	0.0519	0.02	0.029	0.0029
Jawa Timur	Tulungagung	350400	0.0034	0.0021	0.0214	0.003	0.0095	0.0116	0.0049	0.0003	0.0004	0.0012	0.004	0.0618	0.0269	0.029	0.0059
Kalimantan Barat	Kapuas Hulu	610600	0.002	0.0012	0.0102	0.0037	0.0048	0.0094	0.0005	0.0003	0.0002	0.0012	0.0009	0.0344	0.0134	0.0184	0.0026
Kalimantan Barat	Ketapang	610400	0.0062	0.0012	0.0214	0.003	0.0095	0.0116	0.0049	0.0006	0.0009	0.0012	0.0005	0.061	0.0288	0.029	0.0032
Kalimantan Barat	Pontianak	610200	0.002	0.0012	0.0214	0.003	0.0095	0.0116	0.0025	0.0006	0.0002	0.0012	0.0009	0.0541	0.0246	0.0266	0.0029
Kalimantan Barat	Sambas	610100	0.002	0.0021	0.0214	0.003	0.0095	0.0116	0.0049	0.0025	0.0009	0.0032	0.0019	0.063	0.0255	0.029	0.0085
Kalimantan Barat	Sanggau	610300	0.002	0.0012	0.0214	0.0037	0.0095	0.0116	0.0049	0.0012	0.0004	0.002	0.0019	0.0598	0.0246	0.0297	0.0055
Kalimantan Selatan	Hulu Sungai Selatan	630600	0.0153	0.0036	0.0102	0.003	0.0095	0.0116	0.0049	0.0025	0.0018	0.0032	0.004	0.0696	0.0291	0.029	0.0115
Kalimantan Selatan	Hulu Sungai Tengah	630700	0.0153	0.008	0.0102	0.003	0.0095	0.0116	0.0049	0.0012	0.0009	0.0012	0.0019	0.0677	0.0335	0.029	0.0052
Kalimantan Selatan	Hulu Sungai Utara	630800	0.0062	0.008	0.0102	0.0037	0.0095	0.0116	0.0049	0.0025	0.0018	0.0012	0.0019	0.0615	0.0244	0.0297	0.0074
Kalimantan Selatan	Tabalong	630900	0.0062	0.008	0.0214	0.003	0.0095	0.0116	0.0049	0.0003	0.0002	0.0003	0.0005	0.0659	0.0356	0.029	0.0013
Kalimantan Selatan	Tanah Laut	630100	0.0062	0.0036	0.0102	0.003	0.0095	0.0116	0.0049	0.0012	0.0018	0.0012	0.004	0.0572	0.02	0.029	0.0082
Kalimantan Selatan	Tapin	630500	0.0153	0.008	0.0214	0.0037	0.0095	0.0116	0.0049	0.0006	0.0018	0.0032	0.0019	0.0819	0.0447	0.0297	0.0075
Kalimantan Tengah	Barito Selatan	620400	0.0062	0.0021	0.0048	0.003	0.0095	0.0116	0.0049	0.0025	0.0018	0.0012	0.004	0.0516	0.0131	0.029	0.0095
Kalimantan Tengah	Barito Utara	620500	0.0153	0.008	0.0102	0.003	0.0095	0.0116	0.0049	0.0025	0.0018	0.002	0.004	0.0728	0.0335	0.029	0.0103
Kalimantan Tengah	Kapuas	620300	0.0062	0.0036	0.0102	0.003	0.0048	0.0116	0.0049	0.0012	0.0018	0.002	0.0019	0.0512	0.02	0.0243	0.0069
Kalimantan Timur	Berau	640300	0.002	0.0021	0.0048	0.0037	0.0048	0.0116	0.0049	0.0003	0.0002	0.0003	0.0005	0.0352	0.0089	0.025	0.0013
Kalimantan Timur	Bulungan	640400	0.0153	0.0163	0.0102	0.0023	0.0024	0.0116	0.0012	0.0025	0.0009	0.0012	0.0019	0.0658	0.0418	0.0175	0.0065
Kalimantan Timur	Kutai	640200	0.002	0.0021	0.0025	0.0037	0.0048	0.0116	0.0012	0.0025	0.0009	0.0012	0.0019	0.0344	0.0066	0.0213	0.0065
Kalimantan Timur	Kutai Timur	640200	0.0062	0.0021	0.0214	0.0023	0.0024	0.0116	0.0012	0.0012	0.0004	0.0003	0.0019	0.051	0.0297	0.0175	0.0038
Kalimantan Timur	Nunukan	640400	0.0153	0.008	0.0102	0.003	0.0048	0.0094	0.0005	0.0041	0.0031	0.002	0.0067	0.0671	0.0335	0.0177	0.0159
Kalimantan Timur	Pasir	640100	0.0062	0.0036	0.0102	0.0023	0.0024	0.0116	0.0025	0.0012	0.0009	0.0012	0.0009	0.043	0.02	0.0188	0.0042
Lampung	Lampung Barat	180302	0.0153	0.008	0.0102	0.0037	0.0095	0.0116	0.0049	0.0025	0.0031	0.0032	0.004	0.076	0.0335	0.0297	0.0128
Lampung	Lampung Selatan	180101	0.0034	0.0021	0.0025	0.003	0.0095	0.0116	0.0049	0.0012	0.0009	0.0012	0.0019	0.0422	0.008	0.029	0.0052
Lampung	Lampung Timur	180200	0.0062	0.0021	0.0048	0.0023	0.0048	0.0094	0.0049	0.0012	0.0018	0.0012	0.0019	0.0406	0.0131	0.0214	0.0061
Lampung	Lampung Utara	180300	0.0034	0.0021	0.0048	0.0023	0.0095	0.0116	0.0049	0.0003	0.0002	0.0012	0.0009	0.0412	0.0103	0.0283	0.0026
Lampung	Way Kanan	180300	0.0153	0.008	0.0102	0.003	0.0095	0.0116	0.0049	0.0041	0.0018	0.0032	0.0019	0.0735	0.0335	0.029	0.011
Nusa Tenggara Barat	Bima	520600	0.0153	0.0036	0.0214	0.003	0.0048	0.0094	0.0049	0.0012	0.0018	0.0032	0.004	0.0726	0.0403	0.0221	0.0102
Nusa Tenggara Barat	Dompu	520500	0.0062	0.0036	0.0102	0.003	0.0095	0.0116	0.0049	0.0025	0.0031	0.0032	0.004	0.0618	0.02	0.029	0.0128
Nusa Tenggara Barat	Lombok Barat	520101	0.0153	0.008	0.0102	0.003	0.0048	0.0094	0.0049	0.0012	0.0009	0.0012	0.0019	0.0608	0.0335	0.0221	0.0052
Nusa Tenggara Barat	Lombok Timur	520300	0.0254	0.008	0.0048	0.0037	0.0095	0.0116	0.0049	0.0012	0.0018	0.002	0.004	0.0769	0.0382	0.0297	0.009
Nusa Tenggara Timur	Belu	530600	0.0153	0.0036	0.0102	0.003	0.0095	0.0116	0.0049	0.0041	0.0031	0.0005	0.0019	0.0677	0.0291	0.029	0.0096
Nusa Tenggara Timur	Ende	531000	0.0062	0.0036	0.0214	0.0023	0.0095	0.0116	0.0049	0.0012	0.0004	0.0012	0.0009	0.0632	0.0312	0.0283	0.0037
Nusa Tenggara Timur	Flores Timur	530800	0.0034	0.0036	0.0102	0.003	0.0095	0.0116	0.0049	0.0012	0.0009	0.0012	0.0019	0.0514	0.0172	0.029	0.0052
Nusa Tenggara Timur	Manggarai	531200	0.0034	0.0021	0.0048	0.0023	0.0095	0.0116	0.0025	0.0006	0.0009	0.0012	0.0005	0.0394	0.0103	0.0259	0.0032
Nusa Tenggara Timur	Ngada	531100	0.0153	0.0036	0.0048	0.0023	0.0048	0.0116	0.0049	0.0012	0.0009	0.0003	0.0009	0.0506	0.0237	0.0236	0.0033
Nusa Tenggara Timur	Sumba Barat	530100	0.002	0.0036	0.0214	0.0023	0.0024	0.0094	0.0049	0.0006	0.0004	0.0012	0.0019	0.0501	0.027	0.019	0.0041
Nusa Tenggara Timur	Timur Tengah Selatan	530400	0.0153	0.008	0.0102	0.0023	0.0095	0.0116	0.0049	0.0025	0.0031	0.002	0.0019	0.0713	0.0335	0.0283	0.0095
Nusa Tenggara Timur	Timur Tengah Utara	530500	0.0153	0.0036	0.0102	0.0023	0.0095	0.0116	0.0049	0.0041	0.0018	0.0005	0.0019	0.0657	0.0291	0.0283	0.0083
Papua	Fak-Fak	820500	0.0062	0.0036	0.0102	0.0037	0.0048	0.002	0.0025	0.0003	0.0002	0.0003	0.0005	0.0343	0.02	0.013	0.0013
Papua	Jayawijaya	820200	0.0034	0.0012	0.0095	0.0017	0.0095	0.0116	0.0012	0.0003	0.0002	0.0003	0.0005	0.0394	0.0141	0.024	0.0013
Papua	Manokwari	820700	0.0034	0.0036	0.0102	0.0037	0.0095	0.0116	0.0049	0.0012	0.0009	0.0012	0.0009	0.0511	0.0172	0.0297	0.0042
Papua	Mimika	820500	0.002	0.0012	0.0102	0.0017	0.0095	0.0116	0.0012	0.0003	0.0002	0.0003	0.0009	0.0391	0.0134	0.024	0.0017
Papua	Sorong	820600	0.0034	0.0021	0.0102	0.0037	0.0024	0.0016	0.0012	0.0006	0.0009	0.0005	0.0009	0.0275	0.0157	0.0089	0.0029
Riau	Bengkalis	140500	0.0062	0.008	0.0102	0.0037	0.0095	0.0116	0.0049	0.0003	0.0002	0.0012	0.0005	0.0563	0.0244	0.0297	0.0022
Riau	Indragiri Hilir	140200	0.0062	0.0021	0.0102	0.0037	0.0095	0.0116	0.0049	0.0012	0.0018	0.0012	0.004	0.0564	0.0185	0.0297	0.0082
Riau	Kampar	140400	0.0034	0.0012	0.0102	0.0037	0.0095	0.0116	0.0025	0.0003	0.0004	0.0012	0.0019	0.0459	0.0148	0.0273	0.0038
Riau	Kuantan Singingi	140100	0.0153	0.0036	0.0048	0.0037	0.0095	0.0116	0.0049	0.0012	0.0009	0.0012	0.0009	0.0576	0.0237	0.0297	0.0042
Riau	Pelalawan	140400	0.0062	0.0036	0.0102	0.0037	0.0048	0.0094	0.0005	0.0025	0.0031	0.0032	0.0067	0.0539	0.02	0.0184	0.0155
Riau	Rokan Hulu	140400	0.002	0.0012	0.0102	0.0037	0.0095	0.0094	0.0049	0.0003	0.0002	0.0005	0.0009	0.0428	0.0134	0.0275	0.0019
Sulawesi Selatan	Bantaeng	730300	0.0153	0.008	0.0048	0.003	0.0095	0.0116	0.0049	0.0012	0.0002	0.0005	0.0009	0.0599	0.0281	0.029	0.0028
Sulawesi Selatan	Barru	731000	0.0153	0.008	0.0102	0.003	0.0095	0.0116	0.0049	0.0025	0.0018	0.002	0.004	0.0728	0.0335	0.029	0.0103
Sulawesi Selatan	Bone	731100	0.0062	0.0036	0.0214	0.0023	0.0095	0.0116	0.0049	0.0025	0.0031	0.0032	0.0067	0.075	0.0312	0.0283	0.0155
Sulawesi Selatan	Enrekang	731600	0.0153	0.008	0.0102	0.003	0.0095	0.0116	0.0049	0.0012	0.0031	0.0032	0.0067	0.0767	0.0335	0.029	0.0142
Sulawesi Selatan	Gowa	730600	0.0062	0.0036	0.0214	0.003	0.0095	0.0116	0.0049	0.0012	0.0018	0.0032	0.004	0.0704	0.0312	0.029	0.0102
Sulawesi Selatan	Jeneponto	730400	0.0254	0.008	0.0102	0.003	0.0095	0.0116	0.0049	0.0006	0.0009	0.0012	0.004	0.0793	0.0436	0.029	0.0067
Sulawesi Selatan	Luwu	731700	0.0034	0.0036	0.0048	0.0037	0.0095	0.0116	0.0049	0.0012	0.0009	0.002	0.004	0.0496	0.0118	0.0297	0.0081
Sulawesi Selatan	Luwu Utara	731700	0.0062	0.0021	0.0214	0.003	0.0095	0.0116	0.0049	0.0041	0.0031	0.002	0.0019	0.0698	0.0297	0.029	0.0111
Sulawesi Selatan	Majene	732000	0.0153	0.008	0.0102	0.003	0.0095	0.0116	0.0049	0.0041	0.0031	0.0032	0.0067	0.0796	0.0335	0.029	0.0171
Sulawesi Selatan	Maros	730800	0.0062	0.0021	0.0214	0.003	0.0095	0.0116	0.0049	0.0012	0.0004	0.0012	0.0009	0.0624	0.0297	0.029	0.0037
Sulawesi Selatan	Pangkep	730900	0.0153	0.008	0.0102	0.0023	0.0095	0.0116	0.0049	0.0006	0.0009	0.0012	0.0019	0.0664	0.0335	0.0283	0.0046
Sulawesi Selatan	Pinrang	731500	0.0062	0.008	0.0102	0.003	0.0095	0.0116	0.0049	0.0025	0.0031	0.0032	0.0067	0.0689	0.0244	0.029	0.0155
Sulawesi Selatan	Selayar	730100	0.0153	0.0163	0.0102	0.003	0.0095	0.0116	0.0049	0.0025	0.0004	0.0005	0.0019	0.0761	0.0418	0.029	0.0053
Sulawesi Selatan	Sinjai	730700	0.0153	0.008	0.0214	0.003	0.0095	0.0116	0.0025	0.0012	0.0031	0.0032	0.004	0.0828	0.0447	0.0266	0.0115
Sulawesi Selatan	Takalar	730500	0.0062	0.0036	0.0025	0.003	0.0095	0.0116	0.0049	0.0041	0.0031	0.0012	0.0019	0.0516	0.0123	0.029	0.0103
Sulawesi Selatan	Tana Toraja	731800	0.0153	0.0036	0.0048	0.0023	0.0095	0.0116	0.0049	0.0006	0.0009	0.0012	0.0009	0.0556	0.0237	0.0283	0.0036
Sulawesi Tengah	Banggai	720100	0.0254	0.008	0.0102	0.0037	0.0095	0.0094	0.0005	0.0003	0.0002	0.0032	0.0067	0.0771	0.0436	0.0231	0.0104
Sulawesi Tengah	Donggala	720300	0.0062	0.0012	0.0102	0.003	0.0095	0.0116	0.0025	0.0025	0.0004	0.002	0.0009	0.05	0.0176	0.0266	0.0058
Sulawesi Tengah	Morowali	720200	0.002	0.0021	0.0025	0.0037	0.0024	0.0094	0.0025	0.0006	0.0009	0.0005	0.0009	0.0275	0.0066	0.018	0.0029
Sulawesi Tengah	Poso	720200	0.002	0.0012	0.0025	0.0037	0.0024	0.0016	0.0025	0.0006	0.0002	0.0012	0.0019	0.0198	0.0057	0.0102	0.0039
Sulawesi Tengah	Toli-Toli	720400	0.0062	0.0036	0.0025	0.0037	0.0095	0.0048	0.0049	0.0012	0.0009	0.0012	0.0019	0.0404	0.0123	0.0229	0.0052
Sulawesi Tenggara	Buton	740100	0.0153	0.008	0.0102	0.0023	0.0095	0.0116	0.0049	0.0041	0.0031	0.0032	0.004	0.0762	0.0335	0.0283	0.0144
Sulawesi Tenggara	Kolaka	740400	0.0062	0.0036	0.0214	0.0037	0.0095	0.0116	0.0025	0.0012	0.0009	0.002	0.0019	0.0645	0.0312	0.0273	0.006
Sulawesi Utara	Minahasa	710300	0.0062	0.0036	0.0048	0.0037	0.0095	0.0116	0.0049	0.0041	0.0031	0.0032	0.004	0.0587	0.0146	0.0297	0.0144
Sulawesi Utara	Sangihe	710400	0.0062	0.008	0.0214	0.003	0.0095	0.0116	0.0049	0.0025	0.0031	0.002	0.004	0.0762	0.0356	0.029	0.0116
Sumatera Barat	Pasaman	130800	0.0034	0.0036	0.0048	0.003	0.0095	0.0116	0.0049	0.0012	0.0009	0.002	0.004	0.0489	0.0118	0.029	0.0081
Sumatera Barat	Pesisir Selatan	130100	0.0153	0.008	0.0048	0.003	0.0095	0.0116	0.0049	0.0012	0.0009	0.0005	0.004	0.0637	0.0281	0.029	0.0066
Sumatera Barat	Sawah Lunto Sijunjung	130300	0.0062	0.0036	0.0102	0.003	0.0095	0.0116	0.0049	0.0003	0.0004	0.0012	0.0009	0.0518	0.02	0.029	0.0028
Sumatera Barat	Solok	130200	0.0153	0.008	0.0025	0.003	0.0095	0.0116	0.0049	0.0012	0.0009	0.0012	0.0009	0.059	0.0258	0.029	0.0042
Sumatera Selatan	Lahat	160400	0.0153	0.0036	0.0214	0.0037	0.0095	0.0116	0.0049	0.0012	0.0009	0.0005	0.0005	0.0731	0.0403	0.0297	0.0031
Sumatera Selatan	Muara Enim	160300	0.0062	0.008	0.0102	0.0037	0.0095	0.0116	0.0049	0.0006	0.0004	0.0012	0.0019	0.0582	0.0244	0.0297	0.0041
Sumatera Selatan	Musi Banyuasin	160600	0.0153	0.008	0.0102	0.003	0.0095	0.0116	0.0049	0.0025	0.0018	0.002	0.0019	0.0707	0.0335	0.029	0.0082
Sumatera Selatan	Musi Rawas	160500	0.0034	0.0012	0.0214	0.0023	0.0095	0.0116	0.0049	0.0041	0.0031	0.0012	0.0009	0.0636	0.026	0.0283	0.0093
Sumatera Selatan	Ogan Komiring Ilir	160200	0.0034	0.0021	0.0102	0.0023	0.0095	0.0116	0.0049	0.0025	0.0004	0.0005	0.0005	0.0479	0.0157	0.0283	0.0039
Sumatera Utara	Asahan	120600	0.0034	0.0021	0.0102	0.003	0.0095	0.0116	0.0049	0.0003	0.0002	0.0005	0.0009	0.0466	0.0157	0.029	0.0019
Sumatera Utara	Dairi	120800	0.002	0.0021	0.0048	0.0023	0.0095	0.0116	0.0049	0.0041	0.0031	0.0005	0.0009	0.0458	0.0089	0.0283	0.0086
Sumatera Utara	Deli Serdang	121000	0.002	0.0021	0.0025	0.003	0.0095	0.0116	0.0049	0.0025	0.0009	0.0012	0.004	0.0442	0.0066	0.029	0.0086
Sumatera Utara	Labuhan Batu	120500	0.0034	0.0021	0.0025	0.0023	0.0095	0.0116	0.0049	0.0041	0.0018	0.0005	0.0009	0.0436	0.008	0.0283	0.0073
Sumatera Utara	Langkat	121100	0.0062	0.0021	0.0102	0.0023	0.0095	0.0116	0.0049	0.0012	0.0009	0.0005	0.0009	0.0503	0.0185	0.0283	0.0035
Sumatera Utara	Simalungun	120700	0.0062	0.0036	0.0214	0.0023	0.0095	0.0116	0.0049	0.0006	0.0004	0.0005	0.0009	0.0619	0.0312	0.0283	0.0024
Sumatera Utara	Karo	120900	0.002	0.0012	0.0048	0.003	0.0095	0.0116	0.0049	0.0003	0.0002	0.0003	0.0009	0.0387	0.008	0.029	0.0017
Sumatera Utara	Tapanuli Utara	120400	0.0062	0.0036	0.0214	0.0037	0.0095	0.0116	0.0049	0.0012	0.0009	0.0012	0.0019	0.0661	0.0312	0.0297	0.0052

## Sheet: econ_04
prov_kppod_04	kab_kppod_04	kabID97	PDRB_cap_04	hdi_04	valadd_prim_04	valadd_sec_04	valadd_tert_04	tot_econ_04	subtot_econpot_04	subtot_econstr_04
Sumatera Utara	Kota Binjai	127600	0.0062	0.0079	0.0009	0.0043	0.0043	0.0236	0.0141	0.0095
Sumatera Utara	Kota Medan	127500	0.0247	0.0079	0.0009	0.0023	0.0048	0.0406	0.0326	0.008
Sumatera Utara	Kota Pematang Siantar	127300	0.0247	0.0079	0.0009	0.0069	0.0043	0.0447	0.0326	0.0121
Sumatera Utara	Kota Sibolga	127100	0.0126	0.0051	0.0016	0.0023	0.0043	0.0259	0.0177	0.0082
Sumatera Utara	Kota Tanjung Balai	127200	0.0247	0.0051	0.0016	0.0043	0.0019	0.0376	0.0298	0.0078
Sumatera Utara	Kota Tebing Tinggi	127400	0.0126	0.0079	0.0009	0.0043	0.0043	0.03	0.0205	0.0095
Sumatera Barat	Kota Padang	137100	0.0247	0.0079	0.0009	0.0023	0.0048	0.0406	0.0326	0.008
Sumatera Barat	Kota Sawahlunto	130302	0.0247	0.0079	0.0042	0.0023	0.0019	0.041	0.0326	0.0084
Riau	Kota Pekanbaru	147100	0.0126	0.0079	0.0009	0.0023	0.0048	0.0285	0.0205	0.008
Riau	Kota Dumai	140500	0.0062	0.0079	0.0009	0.0069	0.0004	0.0223	0.0141	0.0082
Kep. Riau	Kota Tanjung Pinang	140300	0.0247	0.0051	0.0009	0.0023	0.0048	0.0378	0.0298	0.008
Kep. Riau	Kota Batam	147200	0.0247	0.0079	0.0009	0.0069	0.0008	0.0412	0.0326	0.0086
Jambi	Kota Jambi	157100	0.0062	0.0079	0.0009	0.0023	0.0048	0.0221	0.0141	0.008
Sumatera Selatan	Kota Palembang	167100	0.0247	0.0079	0.0009	0.0069	0.0043	0.0447	0.0326	0.0121
Bangka Belitung	Kota Pangkal Pinang	167200	0.0062	0.0051	0.0009	0.0023	0.0048	0.0193	0.0113	0.008
Bengkulu	Kota Bengkulu	177100	0.0062	0.0079	0.0009	0.001	0.0048	0.0208	0.0141	0.0067
Lampung	Kota Bandar Lampung	187100	0.0247	0.0051	0.0009	0.0043	0.0048	0.0398	0.0298	0.01
Banten	Kota Cilegon	322000	0.0247	0.0051	0.0009	0.0069	0.0008	0.0384	0.0298	0.0086
Banten	Kota Tangerang	321902	0.0247	0.0079	0.0009	0.0069	0.0019	0.0423	0.0326	0.0097
DKI Jakarta	Kota Jakarta	#N/A	0.0247	0.0086	0.0009	0.0043	0.0048	0.0433	0.0333	0.01
Jawa Barat	Kota Bekasi	321802	0.0062	0.0079	0.0009	0.0069	0.0043	0.0262	0.0141	0.0121
Jawa Barat	Kota Bogor	327100	0.0062	0.0079	0.0009	0.0043	0.0048	0.0241	0.0141	0.01
Jawa Barat	Kota Bandung	327300	0.0247	0.0079	0.0009	0.0043	0.0048	0.0426	0.0326	0.01
Jawa Barat	Kota Sukabumi	327200	0.0062	0.0051	0.0009	0.001	0.0048	0.018	0.0113	0.0067
Jawa Barat	Kota Cirebon	327400	0.0247	0.0051	0.0009	0.0069	0.0048	0.0424	0.0298	0.0126
Jawa Tengah	Kota Semarang	337400	0.0247	0.0079	0.0009	0.0043	0.0048	0.0426	0.0326	0.01
Jawa Tengah	Kota Tegal	337600	0.0062	0.0051	0.0009	0.0043	0.0048	0.0213	0.0113	0.01
Jawa Tengah	Kota Pekalongan	337500	0.0126	0.0051	0.0009	0.0043	0.0043	0.0272	0.0177	0.0095
Jawa Tengah	Kota Surakarta	337200	0.0247	0.0079	0.0009	0.0069	0.0048	0.0452	0.0326	0.0126
DI Yogyakarta	Kota Yogyakarta	347100	0.0247	0.0086	0.0009	0.0023	0.0048	0.0413	0.0333	0.008
Jawa Timur	Kota Kediri	357100	0.0247	0.0079	0.0009	0.0069	0.0008	0.0412	0.0326	0.0086
Jawa Timur	Kota Malang	357300	0.0247	0.0079	0.0009	0.0069	0.0048	0.0452	0.0326	0.0126
Jawa Timur	Kota Madiun	357700	0.0062	0.0051	0.0009	0.0069	0.0048	0.0239	0.0113	0.0126
Jawa Timur	Kota Mojokerto	357600	0.0126	0.0079	0.0009	0.0023	0.0048	0.0285	0.0205	0.008
Jawa Timur	Kota Surabaya	357800	0.0247	0.0079	0.0009	0.0069	0.0048	0.0452	0.0326	0.0126
Jawa Timur	Kota Probolinggo	357400	0.0126	0.0051	0.0009	0.0023	0.0048	0.0257	0.0177	0.008
Bali	Kota Denpasar	510302	0.0247	0.0079	0.0009	0.0023	0.0048	0.0406	0.0326	0.008
Kalimantan Barat	Kota Pontianak	617100	0.0247	0.0051	0.0009	0.0023	0.0048	0.0378	0.0298	0.008
Kalimantan Tengah	Kota Palangkaraya	627100	0.0126	0.0079	0.0009	0.0023	0.0043	0.028	0.0205	0.0075
Kalimantan Selatan	Kota Banjarmasin	637100	0.003	0.0051	0.0009	0.0043	0.0048	0.0181	0.0081	0.01
Kalimantan Timur	Kota Balikpapan	647100	0.0247	0.0079	0.0009	0.0069	0.0043	0.0447	0.0326	0.0121
Kalimantan Timur	Kota Samarinda	647200	0.0247	0.0079	0.0009	0.0043	0.0048	0.0426	0.0326	0.01
Sulawesi Utara	Kota Bitung	710302	0.0247	0.0051	0.0009	0.0043	0.0048	0.0398	0.0298	0.01
Sulawesi Utara	Kota Manado	717200	0.0126	0.0079	0.0009	0.0023	0.0048	0.0285	0.0205	0.008
Gorontalo	Kota Gorontalo	717100	0.003	0.0051	0.0009	0.0023	0.0048	0.0161	0.0081	0.008
Sulawesi Tengah	Kota Palu	720302	0.0126	0.0051	0.0009	0.0043	0.0019	0.0248	0.0177	0.0071
Sulawesi Tenggara	Kota Kendari	740302	0.0062	0.0051	0.0016	0.0023	0.0048	0.02	0.0113	0.0087
Sulawesi Selatan	Kota Makasar	737100	0.0247	0.0079	0.0009	0.0043	0.0048	0.0426	0.0326	0.01
Sulawesi Selatan	Kota Pare-Pare	737200	0.0062	0.0079	0.0009	0.0023	0.0048	0.0221	0.0141	0.008
Nusa Tenggara Barat	Kota Mataram	520102	0.0062	0.0051	0.0009	0.0023	0.0048	0.0193	0.0113	0.008
Nusa Tenggara Timur	Kota Kupang	530302	0.0126	0.0079	0.0009	0.001	0.0048	0.0272	0.0205	0.0067
Irian Jaya Barat	Kota Sorong	820600	0.0062	0.0079	0.0009	0.0043	0.0043	0.0236	0.0141	0.0095
Papua	Kota Jayapura	820302	0.0126	0.0079	0.0009	0.0023	0.0043	0.028	0.0205	0.0075
Sumatera Utara	Asahan	120600	0.0247	0.0051	0.0042	0.0069	0.0008	0.0417	0.0298	0.0119
Sumatera Utara	Dairi	120800	0.0126	0.0051	0.0076	0.001	0.0008	0.0271	0.0177	0.0094
Sumatera Utara	Deli Serdang	121000	0.0062	0.0051	0.0042	0.0043	0.0008	0.0206	0.0113	0.0093
Sumatera Utara	Langkat	121100	0.0062	0.0051	0.0076	0.0023	0.0008	0.022	0.0113	0.0107
Sumatera Utara	Simalungun	120700	0.0062	0.0051	0.0076	0.0023	0.0004	0.0216	0.0113	0.0103
Sumatera Utara	Karo	120900	0.0126	0.0079	0.0076	0.0006	0.0008	0.0295	0.0205	0.009
Sumatera Utara	Labuhan Batu	120500	0.0247	0.0051	0.0042	0.0069	0.0004	0.0413	0.0298	0.0115
Sumatera Utara	Tapanuli Utara	120400	0.0062	0.0051	0.0076	0.001	0.0008	0.0207	0.0113	0.0094
Sumatera Barat	Pesisir Selatan	130100	0.0062	0.0051	0.0042	0.0023	0.0019	0.0197	0.0113	0.0084
Sumatera Barat	Sawah Lunto Sijunjung	130300	0.0062	0.0014	0.0042	0.0023	0.0019	0.016	0.0076	0.0084
Sumatera Barat	Pasaman	130800	0.0062	0.0051	0.0042	0.001	0.0019	0.0184	0.0113	0.0071
Sumatera Barat	Solok	130200	0.0062	0.0051	0.0042	0.001	0.0019	0.0184	0.0113	0.0071
Riau	Bengkalis	140500	0.003	0.0051	0.0076	0.001	0.0004	0.0171	0.0081	0.009
Riau	Indragiri Hilir	140200	0.0062	0.0051	0.0076	0.001	0.0019	0.0218	0.0113	0.0105
Riau	Kampar	140400	0.003	0.0051	0.0076	0.0006	0.0004	0.0167	0.0081	0.0086
Riau	Kuantan Singingi	140100	0.0062	0.0051	0.0076	0.001	0.0004	0.0203	0.0113	0.009
Riau	Pelalawan	140400	0.0062	0.0051	0.0076	0.0023	0.0004	0.0216	0.0113	0.0103
Riau	Rokan Hulu	140400	0.003	0.0051	0.0076	0.001	0.0004	0.0171	0.0081	0.009
Jambi	Batanghari	150400	0.0062	0.0051	0.0042	0.0023	0.0019	0.0197	0.0113	0.0084
Jambi	Bungo	150200	0.0062	0.0051	0.0042	0.001	0.0019	0.0184	0.0113	0.0071
Jambi	Kerinci	150100	0.0062	0.0051	0.0042	0.001	0.0019	0.0184	0.0113	0.0071
Jambi	Tanjung Jabung Timur	150500	0.0062	0.0051	0.0076	0.001	0.0008	0.0207	0.0113	0.0094
Jambi	Tebo	150200	0.003	0.0051	0.0076	0.001	0.0019	0.0186	0.0081	0.0105
Sumatera Selatan	Muara Enim	160300	0.0126	0.0051	0.0076	0.0006	0.0004	0.0263	0.0177	0.0086
Sumatera Selatan	Musi Banyuasin	160600	0.0247	0.0051	0.0076	0.0023	0.0008	0.0405	0.0298	0.0107
Sumatera Selatan	Musi Rawas	160500	0.003	0.0051	0.0076	0.001	0.0004	0.0171	0.0081	0.009
Sumatera Selatan	Ogan Komiring Ilir	160200	0.0062	0.0051	0.0042	0.0023	0.0019	0.0197	0.0113	0.0084
Sumatera Selatan	Lahat	160400	0.0062	0.0051	0.0042	0.0023	0.0008	0.0186	0.0113	0.0073
Bangka Belitung	Bangka	160700	0.0062	0.0051	0.0076	0.0023	0.0008	0.022	0.0113	0.0107
Bangka Belitung	Belitung	160700	0.0126	0.0051	0.0042	0.0023	0.0019	0.0261	0.0177	0.0084
Bengkulu	Bengkulu Selatan	170100	0.0062	0.0051	0.0042	0.001	0.0019	0.0184	0.0113	0.0071
Bengkulu	Rejang Lebong	170200	0.003	0.0051	0.0076	0.001	0.0008	0.0175	0.0081	0.0094
Bengkulu	Bengkulu Utara	170300	0.003	0.0051	0.0042	0.0023	0.0008	0.0154	0.0081	0.0073
Lampung	Lampung Barat	180302	0.0016	0.0051	0.0076	0.001	0.0019	0.0172	0.0067	0.0105
Lampung	Lampung Selatan	180101	0.003	0.0051	0.0042	0.0023	0.0019	0.0165	0.0081	0.0084
Lampung	Lampung Timur	180200	0.003	0.0051	0.0076	0.001	0.0008	0.0175	0.0081	0.0094
Lampung	Lampung Utara	180300	0.003	0.0051	0.0076	0.001	0.0008	0.0175	0.0081	0.0094
Lampung	Way Kanan	180300	0.0016	0.0051	0.0076	0.001	0.0008	0.0161	0.0067	0.0094
Banten	Lebak	320200	0.003	0.0014	0.0042	0.001	0.0019	0.0115	0.0044	0.0071
Banten	Serang	322000	0.0062	0.0051	0.0009	0.0069	0.0008	0.0199	0.0113	0.0086
Banten	Tangerang	321901	0.0062	0.0051	0.0009	0.0069	0.0019	0.021	0.0113	0.0097
Jawa Barat	Bekasi	321801	0.0247	0.0051	0.0009	0.0069	0.0004	0.038	0.0298	0.0082
Jawa Barat	Bogor	320300	0.003	0.0051	0.0009	0.0069	0.0019	0.0178	0.0081	0.0097
Jawa Barat	Ciamis	320900	0.0062	0.0051	0.0042	0.0023	0.0043	0.0221	0.0113	0.0108
Jawa Barat	Tasikmalaya	320800	0.003	0.0051	0.0042	0.001	0.0043	0.0176	0.0081	0.0095
Jawa Barat	Garut	320700	0.003	0.0051	0.0042	0.001	0.0043	0.0176	0.0081	0.0095
Jawa Barat	Sumedang	321300	0.003	0.0051	0.0042	0.0023	0.0019	0.0165	0.0081	0.0084
Jawa Barat	Bandung	320600	0.0062	0.0051	0.0009	0.0069	0.0019	0.021	0.0113	0.0097
Jawa Barat	Cianjur	320500	0.003	0.0051	0.0042	0.001	0.0043	0.0176	0.0081	0.0095
Jawa Barat	Sukabumi	320400	0.003	0.0051	0.0042	0.0023	0.0019	0.0165	0.0081	0.0084
Jawa Barat	Cirebon	321100	0.003	0.0051	0.0042	0.0023	0.0019	0.0165	0.0081	0.0084
Jawa Barat	Kuningan	321000	0.003	0.0051	0.0042	0.001	0.0043	0.0176	0.0081	0.0095
Jawa Barat	Indramayu	321400	0.0062	0.0014	0.0076	0.0006	0.0008	0.0166	0.0076	0.009
Jawa Barat	Purwakarta	321600	0.0247	0.0051	0.0009	0.0069	0.0019	0.0395	0.0298	0.0097
Jawa Barat	Karawang	321700	0.0062	0.0051	0.0016	0.0069	0.0019	0.0217	0.0113	0.0104
Jawa Barat	Subang	321500	0.0062	0.0051	0.0042	0.001	0.0043	0.0208	0.0113	0.0095
Jawa Tengah	Kendal	332400	0.0062	0.0051	0.0016	0.0069	0.0019	0.0217	0.0113	0.0104
Jawa Tengah	Pekalongan	332600	0.0062	0.0051	0.0016	0.0043	0.0019	0.0191	0.0113	0.0078
Jawa Tengah	Pemalang	332700	0.0016	0.0051	0.0042	0.0023	0.0019	0.0151	0.0067	0.0084
Jawa Tengah	Tegal	332800	0.0016	0.0051	0.0016	0.0043	0.0043	0.0169	0.0067	0.0102
Jawa Tengah	Jepara	332000	0.003	0.0051	0.0016	0.0043	0.0019	0.0159	0.0081	0.0078
Jawa Tengah	Kudus	331900	0.0247	0.0051	0.0009	0.0069	0.0019	0.0395	0.0298	0.0097
Jawa Tengah	Banyumas	330200	0.0016	0.0051	0.0042	0.0023	0.0019	0.0151	0.0067	0.0084
Jawa Tengah	Cilacap	330100	0.0247	0.0051	0.0009	0.0069	0.0019	0.0395	0.0298	0.0097
Jawa Tengah	Wonosobo	330700	0.0016	0.0051	0.0042	0.0023	0.0019	0.0151	0.0067	0.0084
Jawa Tengah	Kebumen	330500	0.0016	0.0051	0.0042	0.001	0.0019	0.0138	0.0067	0.0071
#N/A	Boyolali	330900	0.003	0.0051	0.0042	0.0023	0.0019	0.0165	0.0081	0.0084
Jawa Tengah	Sukoharjo	331100	0.0062	0.0051	0.0016	0.0043	0.0019	0.0191	0.0113	0.0078
Jawa Tengah	Karanganyar	331300	0.0062	0.0051	0.0016	0.0069	0.0008	0.0206	0.0113	0.0093
Jawa Tengah	Klaten	331000	0.003	0.0051	0.0016	0.0043	0.0019	0.0159	0.0081	0.0078
Jawa Tengah	Magelang	330800	0.003	0.0051	0.0042	0.0023	0.0019	0.0165	0.0081	0.0084
DI Yogyakarta	Bantul	340200	0.003	0.0051	0.0042	0.0023	0.0019	0.0165	0.0081	0.0084
DI Yogyakarta	Gunung Kidul	340300	0.0062	0.0051	0.0042	0.0023	0.0019	0.0197	0.0113	0.0084
Jawa Timur	Blitar	350500	0.003	0.0051	0.0042	0.001	0.0043	0.0176	0.0081	0.0095
Jawa Timur	Kediri	350600	0.003	0.0051	0.0042	0.0023	0.0019	0.0165	0.0081	0.0084
Jawa Timur	Magetan	352000	0.003	0.0051	0.0042	0.0023	0.0019	0.0165	0.0081	0.0084
Jawa Timur	Ponorogo	350200	0.003	0.0051	0.0042	0.0023	0.0019	0.0165	0.0081	0.0084
Jawa Timur	Tulungagung	350400	0.0062	0.0051	0.0016	0.0023	0.0048	0.02	0.0113	0.0087
Jawa Timur	Mojokerto	351600	0.0062	0.0051	0.0042	0.0043	0.0019	0.0217	0.0113	0.0104
Jawa Timur	Pamekasan	352800	0.0016	0.0014	0.0076	0.001	0.0008	0.0124	0.003	0.0094
Jawa Timur	Bangkalan	352600	0.003	0.0014	0.0042	0.001	0.0043	0.0139	0.0044	0.0095
Jawa Timur	Pasuruan	351400	0.003	0.0014	0.0042	0.0043	0.0019	0.0148	0.0044	0.0104
Jawa Timur	Sidoarjo	351500	0.0247	0.0079	0.0009	0.0069	0.0019	0.0423	0.0326	0.0097
Jawa Timur	Gresik	352500	0.0247	0.0051	0.0009	0.0069	0.0019	0.0395	0.0298	0.0097
Jawa Timur	Jombang	351700	0.003	0.0051	0.0042	0.0023	0.0019	0.0165	0.0081	0.0084
Jawa Timur	Lamongan	352400	0.003	0.0051	0.0042	0.001	0.0019	0.0152	0.0081	0.0071
Jawa Timur	Banyuwangi	351000	0.0062	0.0051	0.0076	0.001	0.0019	0.0218	0.0113	0.0105
Jawa Timur	Bondowoso	351100	0.0016	0.0008	0.0042	0.001	0.0019	0.0095	0.0024	0.0071
Jawa Timur	Situbondo	351200	0.0062	0.0008	0.0042	0.0023	0.0048	0.0183	0.007	0.0113
Jawa Timur	Jember	350900	0.003	0.0014	0.0042	0.001	0.0019	0.0115	0.0044	0.0071
Bali	Badung	510301	0.0247	0.0051	0.0009	0.001	0.0048	0.0365	0.0298	0.0067
Bali	Bangli	510600	0.0062	0.0051	0.0042	0.001	0.0043	0.0208	0.0113	0.0095
Bali	Buleleng	510800	0.0062	0.0051	0.0042	0.001	0.0043	0.0208	0.0113	0.0095
Bali	Gianyar	510400	0.0126	0.0051	0.0016	0.0023	0.0043	0.0259	0.0177	0.0082
Bali	Jembrana	510100	0.0062	0.0051	0.0042	0.001	0.0048	0.0213	0.0113	0.01
Bali	Tabanan	510200	0.0062	0.0051	0.0042	0.001	0.0043	0.0208	0.0113	0.0095
Bali	Klungkung	510500	0.0126	0.0051	0.0042	0.0023	0.0019	0.0261	0.0177	0.0084
Bali	Karangasem	510700	0.003	0.0014	0.0042	0.001	0.0043	0.0139	0.0044	0.0095
Kalimantan Barat	Kapuas Hulu	610600	0.0062	0.0051	0.0042	0.001	0.0019	0.0184	0.0113	0.0071
Kalimantan Barat	Ketapang	610400	0.003	0.0051	0.0042	0.0023	0.0019	0.0165	0.0081	0.0084
Kalimantan Barat	Pontianak	610200	0.0126	0.0051	0.0016	0.0069	0.0019	0.0281	0.0177	0.0104
Kalimantan Barat	Sambas	610100	0.0062	0.0014	0.0042	0.001	0.0019	0.0147	0.0076	0.0071
Kalimantan Barat	Sanggau	610300	0.0062	0.0051	0.0042	0.0043	0.0008	0.0206	0.0113	0.0093
Kalimantan Tengah	Barito Selatan	620400	0.0126	0.0051	0.0042	0.001	0.0019	0.0248	0.0177	0.0071
Kalimantan Tengah	Barito Utara	620500	0.0247	0.0051	0.0076	0.001	0.0008	0.0392	0.0298	0.0094
Kalimantan Tengah	Kapuas	620300	0.0062	0.0051	0.0076	0.001	0.0019	0.0218	0.0113	0.0105
Kalimantan Selatan	Hulu Sungai Selatan	630600	0.0062	0.0051	0.0042	0.001	0.0019	0.0184	0.0113	0.0071
Kalimantan Selatan	Hulu Sungai Tengah	630700	0.003	0.0051	0.0042	0.001	0.0019	0.0152	0.0081	0.0071
Kalimantan Selatan	Hulu Sungai Utara	630800	0.003	0.0014	0.0042	0.0023	0.0019	0.0128	0.0044	0.0084
Kalimantan Selatan	Tabalong	630900	0.0247	0.0051	0.0076	0.0006	0.0004	0.0384	0.0298	0.0086
Kalimantan Selatan	Tanah Laut	630100	0.0062	0.0051	0.0042	0.0023	0.0019	0.0197	0.0113	0.0084
Kalimantan Selatan	Tapin	630500	0.0062	0.0051	0.0076	0.001	0.0008	0.0207	0.0113	0.0094
Kalimantan Timur	Berau	640300	0.0247	0.0051	0.0076	0.0023	0.0008	0.0405	0.0298	0.0107
Kalimantan Timur	Kutai	640200	0.0247	0.0051	0.0076	0.001	0.0004	0.0388	0.0298	0.009
Kalimantan Timur	Pasir	640100	0.0247	0.0051	0.0076	0.001	0.0004	0.0388	0.0298	0.009
Kalimantan Timur	Bulungan	640400	0.0247	0.0051	0.0042	0.0023	0.0004	0.0367	0.0298	0.0069
Kalimantan Timur	Kutai Timur	640200	0.0247	0.0051	0.0076	0.001	0.0004	0.0388	0.0298	0.009
Kalimantan Timur	Nunukan	640400	0.003	0.0051	0.0076	0.001	0.0004	0.0171	0.0081	0.009
Sulawesi Utara	Minahasa	710300	0.003	0.0079	0.0042	0.0023	0.0019	0.0193	0.0109	0.0084
Sulawesi Utara	Sangihe	710400	0.0062	0.0051	0.0042	0.001	0.0019	0.0184	0.0113	0.0071
Gorontalo	Gorontalo	710100	0.0016	0.0051	0.0042	0.0023	0.0008	0.014	0.0067	0.0073
Sulawesi Tengah	Banggai	720100	0.0062	0.0051	0.0076	0.0023	0.0008	0.022	0.0113	0.0107
Sulawesi Tengah	Toli-Toli	720400	0.0062	0.0051	0.0076	0.001	0.0008	0.0207	0.0113	0.0094
Sulawesi Tengah	Donggala	720300	0.0062	0.0051	0.0076	0.001	0.0008	0.0207	0.0113	0.0094
Sulawesi Tengah	Morowali	720200	0.0062	0.0051	0.0076	0.001	0.0008	0.0207	0.0113	0.0094
Sulawesi Tengah	Poso	720200	0.003	0.0051	0.0042	0.0023	0.0019	0.0165	0.0081	0.0084
Sulawesi Tenggara	Buton	740100	0.0016	0.0051	0.0042	0.001	0.0008	0.0127	0.0067	0.006
Sulawesi Tenggara	Kolaka	740400	0.0062	0.0051	0.0076	0.0023	0.0008	0.022	0.0113	0.0107
Sulawesi Selatan	Gowa	730600	0.003	0.0051	0.0042	0.001	0.0008	0.0141	0.0081	0.006
Sulawesi Selatan	Takalar	730500	0.003	0.0051	0.0042	0.0023	0.0008	0.0154	0.0081	0.0073
Sulawesi Selatan	Jeneponto	730400	0.0016	0.0014	0.0076	0.001	0.0008	0.0124	0.003	0.0094
Sulawesi Selatan	Bantaeng	730300	0.003	0.0051	0.0076	0.001	0.0008	0.0175	0.0081	0.0094
Sulawesi Selatan	Sinjai	730700	0.003	0.0051	0.0076	0.0006	0.0004	0.0167	0.0081	0.0086
Sulawesi Selatan	Selayar	730100	0.003	0.0051	0.0042	0.001	0.0019	0.0152	0.0081	0.0071
Sulawesi Selatan	Bone	731100	0.0062	0.0051	0.0076	0.001	0.0004	0.0203	0.0113	0.009
Sulawesi Selatan	Maros	730800	0.0062	0.0051	0.0076	0.0023	0.0008	0.022	0.0113	0.0107
Sulawesi Selatan	Pangkep	730900	0.0062	0.0051	0.0016	0.0069	0.0004	0.0202	0.0113	0.0089
Sulawesi Selatan	Barru	731000	0.003	0.0051	0.0042	0.001	0.0019	0.0152	0.0081	0.0071
Sulawesi Selatan	Pinrang	731500	0.0062	0.0051	0.0076	0.001	0.0008	0.0207	0.0113	0.0094
Sulawesi Selatan	Majene	732000	0.003	0.0051	0.0076	0.001	0.0008	0.0175	0.0081	0.0094
Sulawesi Selatan	Enrekang	731600	0.003	0.0051	0.0076	0.001	0.0008	0.0175	0.0081	0.0094
Sulawesi Selatan	Tana Toraja	731800	0.0016	0.0051	0.0076	0.001	0.0008	0.0161	0.0067	0.0094
Sulawesi Selatan	Luwu	731700	0.003	0.0051	0.0076	0.0023	0.0004	0.0184	0.0081	0.0103
Sulawesi Selatan	Luwu Utara	731700	0.0062	0.0051	0.0076	0.0006	0.0004	0.0199	0.0113	0.0086
Nusa Tenggara Barat	Bima	520600	0.003	0.0014	0.0076	0.001	0.0019	0.0149	0.0044	0.0105
Nusa Tenggara Barat	Lombok Barat	520101	0.003	0.0008	0.0042	0.001	0.0019	0.0109	0.0038	0.0071
Nusa Tenggara Barat	Dompu	520500	0.0062	0.0014	0.0042	0.001	0.0019	0.0147	0.0076	0.0071
Nusa Tenggara Barat	Lombok Timur	520300	0.0016	0.0008	0.0042	0.0023	0.0019	0.0108	0.0024	0.0084
Nusa Tenggara Timur	Ende	531000	0.0016	0.0014	0.0042	0.001	0.0019	0.0101	0.003	0.0071
Nusa Tenggara Timur	Flores Timur	530800	0.0016	0.0051	0.0042	0.001	0.0019	0.0138	0.0067	0.0071
Nusa Tenggara Timur	Manggarai	531200	0.0016	0.0014	0.0076	0.001	0.0008	0.0124	0.003	0.0094
Nusa Tenggara Timur	Ngada	531100	0.0016	0.0051	0.0076	0.001	0.0004	0.0157	0.0067	0.009
Nusa Tenggara Timur	Timur Tengah Selatan	530400	0.0016	0.0014	0.0076	0.001	0.0004	0.012	0.003	0.009
Nusa Tenggara Timur	Timur Tengah Utara	530500	0.0016	0.0014	0.0076	0.001	0.0004	0.012	0.003	0.009
Nusa Tenggara Timur	Belu	530600	0.0016	0.0014	0.0042	0.001	0.0019	0.0101	0.003	0.0071
Nusa Tenggara Timur	Sumba Barat	530100	0.0016	0.0008	0.0076	0.0006	0.0004	0.011	0.0024	0.0086
Irian Jaya Barat	Fak-Fak	820500	0.0126	0.0051	0.0042	0.0023	0.0008	0.025	0.0177	0.0073
Irian Jaya Barat	Manokwari	820700	0.0062	0.0014	0.0042	0.0023	0.0008	0.0149	0.0076	0.0073
Irian Jaya Barat	Sorong	820600	0.0247	0.0051	0.0076	0.001	0.0004	0.0388	0.0298	0.009
Papua	Jayawijaya	820200	0.0062	0.0008	0.0076	0.0006	0.0019	0.0171	0.007	0.0101
Irian Jaya Barat	Mimika	820500	0.003	0.0051	0.0076	0.0006	0.0004	0.0167	0.0081	0.0086

## Sheet: labprod_04
prov_kppod_04	kab_kppod_04	kabID97	seek_labforce_04	prodage_pop_04	jhighw_totw_04	minwage_cpi_04	salary_cpi_04	Mfvaladd_Mfwork_04	tot_labprod_04	subtot_manpav_04	subtot_labcost_04
Sumatera Utara	Kota Binjai	127600	0.0113	0.0019	0.0032	0.0015	0.002	0.0066	0.0265	0.0164	0.0086
Sumatera Utara	Kota Medan	127500	0.0068	0.0025	0.0027	0.0015	0.002	0.0066	0.0221	0.012	0.0086
Sumatera Utara	Kota Pematang Siantar	127300	0.0113	0.0019	0.0032	0.0015	0.002	0.0273	0.0472	0.0164	0.0293
Sumatera Utara	Kota Sibolga	127100	0.0113	0.0019	0.0032	0.0015	0.002	0.014	0.0339	0.0164	0.016
Sumatera Utara	Kota Tanjung Balai	127200	0.0015	0.0015	0.0025	0.0015	0.002	0.0273	0.0363	0.0055	0.0293
Sumatera Utara	Kota Tebing Tinggi	127400	0.0031	0.0019	0.0032	0.0015	0.0021	0.0066	0.0184	0.0082	0.0087
Sumatera Barat	Kota Padang	137100	0.0113	0.0025	0.0025	0.0029	0.0014	0.0273	0.0479	0.0163	0.0287
Sumatera Barat	Kota Sawahlunto	130302	0.0031	0.0019	0.0009	0.0029	0.002	0.0273	0.0381	0.0059	0.0293
Riau	Kota Pekanbaru	147100	0.0068	0.0019	0.0027	0.0029	0.0014	0.0066	0.0223	0.0114	0.008
Riau	Kota Dumai	140500	0.0113	0.0019	0.0032	0.0022	0.002	0.0028	0.0234	0.0164	0.0048
Kep. Riau	Kota Tanjung Pinang	140300	0.0031	0.0019	0.0025	0.0022	0.002	0.0273	0.039	0.0075	0.0293
Kep. Riau	Kota Batam	147200	0.0031	0.0034	0.0004	0.0015	0.0014	0.0273	0.0371	0.0069	0.0287
Jambi	Kota Jambi	157100	0.0031	0.0025	0.0027	0.006	0.002	0.0066	0.0229	0.0083	0.0086
Sumatera Selatan	Kota Palembang	167100	0.0113	0.0019	0.0025	0.0029	0.002	0.0273	0.0479	0.0157	0.0293
Bangka Belitung	Kota Pangkal Pinang	167200	0.0113	0.0019	0.0032	0.0029	0.002	0.0028	0.0241	0.0164	0.0048
Bengkulu	Kota Bengkulu	177100	0.0113	0.0019	0.0009	0.0088	0.0014	0.0066	0.0309	0.0141	0.008
Lampung	Kota Bandar Lampung	187100	0.0113	0.0025	0.0025	0.0088	0.002	0.0273	0.0544	0.0163	0.0293
Banten	Kota Cilegon	322000	0.0031	0.0019	0.0025	0.0015	0.0014	0.0066	0.017	0.0075	0.008
Banten	Kota Tangerang	321902	0.0068	0.0025	0.0025	0.0015	0.002	0.0273	0.0426	0.0118	0.0293
DKI Jakarta	Kota Jakarta	#N/A	0.0068	0.0025	0.0025	0.0015	0.0014	0.0273	0.042	0.0118	0.0287
Jawa Barat	Kota Bekasi	321802	0.0031	0.0025	0.0009	0.0015	0.0014	0.0066	0.016	0.0065	0.008
Jawa Barat	Kota Bogor	327100	0.0113	0.0019	0.0027	0.0015	0.0014	0.0066	0.0254	0.0159	0.008
Jawa Barat	Kota Bandung	327300	0.0068	0.0019	0.0025	0.0015	0.002	0.0066	0.0213	0.0112	0.0086
Jawa Barat	Kota Sukabumi	327200	0.0113	0.0019	0.0032	0.006	0.0021	0.0028	0.0273	0.0164	0.0049
Jawa Barat	Kota Cirebon	327400	0.0031	0.0019	0.0025	0.006	0.002	0.0273	0.0428	0.0075	0.0293
Jawa Tengah	Kota Semarang	337400	0.0031	0.0019	0.0025	0.0029	0.002	0.014	0.0264	0.0075	0.016
Jawa Tengah	Kota Tegal	337600	0.0068	0.0019	0.0027	0.006	0.0021	0.0066	0.0261	0.0114	0.0087
Jawa Tengah	Kota Pekalongan	337500	0.0008	0.0019	0.0032	0.006	0.0021	0.0066	0.0206	0.0059	0.0087
Jawa Tengah	Kota Surakarta	337200	0.0031	0.0025	0.0027	0.006	0.002	0.0066	0.0229	0.0083	0.0086
DI Yogyakarta	Kota Yogyakarta	347100	0.0031	0.0025	0.0009	0.006	0.002	0.0066	0.0211	0.0065	0.0086
Jawa Timur	Kota Kediri	357100	0.0113	0.0019	0.0025	0.0029	0.0021	0.0273	0.048	0.0157	0.0294
Jawa Timur	Kota Malang	357300	0.0113	0.0034	0.0004	0.0022	0.002	0.0273	0.0466	0.0151	0.0293
Jawa Timur	Kota Madiun	357700	0.0113	0.0019	0.0025	0.0088	0.002	0.0066	0.0331	0.0157	0.0086
Jawa Timur	Kota Mojokerto	357600	0.0031	0.0019	0.0027	0.0029	0.002	0.0028	0.0154	0.0077	0.0048
Jawa Timur	Kota Surabaya	357800	0.0031	0.0025	0.0025	0.0022	0.002	0.0273	0.0396	0.0081	0.0293
Jawa Timur	Kota Probolinggo	357400	0.0113	0.0019	0.0025	0.0029	0.002	0.014	0.0346	0.0157	0.016
Bali	Kota Denpasar	510302	0.0031	0.0025	0.0025	0.0029	0.002	0.0066	0.0196	0.0081	0.0086
Kalimantan Barat	Kota Pontianak	617100	0.0031	0.0019	0.0009	0.0029	0.002	0.0028	0.0136	0.0059	0.0048
Kalimantan Tengah	Kota Palangkaraya	627100	0.0031	0.0025	0.0025	0.0029	0.0014	0.0066	0.019	0.0081	0.008
Kalimantan Selatan	Kota Banjarmasin	637100	0.0068	0.0025	0.0025	0.0029	0.002	0.014	0.0307	0.0118	0.016
Kalimantan Timur	Kota Balikpapan	647100	0.0031	0.0019	0.0027	0.0015	0.0014	0.0066	0.0172	0.0077	0.008
Kalimantan Timur	Kota Samarinda	647200	0.0015	0.0025	0.0027	0.0015	0.0014	0.0273	0.0369	0.0067	0.0287
Sulawesi Utara	Kota Bitung	710302	0.0031	0.0019	0.0032	0.0022	0.0014	0.014	0.0258	0.0082	0.0154
Sulawesi Utara	Kota Manado	717200	0.0008	0.0025	0.0025	0.0022	0.0014	0.0066	0.016	0.0058	0.008
Gorontalo	Kota Gorontalo	717100	0.0068	0.0019	0.0009	0.0029	0.002	0.0066	0.0211	0.0096	0.0086
Sulawesi Tengah	Kota Palu	720302	0.0031	0.0019	0.0025	0.0029	0.0014	0.0273	0.0391	0.0075	0.0287
Sulawesi Tenggara	Kota Kendari	740302	0.0113	0.0019	0.0025	0.0029	0.0014	0.0066	0.0266	0.0157	0.008
Sulawesi Selatan	Kota Makasar	737100	0.0113	0.0019	0.0025	0.0029	0.0014	0.0273	0.0473	0.0157	0.0287
Sulawesi Selatan	Kota Pare-Pare	737200	0.0113	0.0019	0.0009	0.0029	0.002	0.0028	0.0218	0.0141	0.0048
Nusa Tenggara Barat	Kota Mataram	520102	0.0031	0.0019	0.0009	0.006	0.0021	0.0066	0.0206	0.0059	0.0087
Nusa Tenggara Timur	Kota Kupang	530302	0.0113	0.0025	0.0025	0.006	0.002	0.0066	0.0309	0.0163	0.0086
Irian Jaya Barat	Kota Sorong	820600	0.0068	0.0015	0.0032	0.0015	0.0014	0.0273	0.0417	0.0115	0.0287
Papua	Kota Jayapura	820302	0.0113	0.0019	0.0027	0.0015	0.0014	0.0273	0.0461	0.0159	0.0287
Sumatera Utara	Asahan	120600	0.0031	0.0019	0.0027	0.0015	0.002	0.0273	0.0385	0.0077	0.0293
Sumatera Utara	Dairi	120800	0.0031	0.0015	0.0032	0.0015	0.002	0.0028	0.0141	0.0078	0.0048
Sumatera Utara	Deli Serdang	121000	0.0031	0.0019	0.0032	0.0015	0.0021	0.014	0.0258	0.0082	0.0161
Sumatera Utara	Langkat	121100	0.0031	0.0019	0.0032	0.0015	0.002	0.0273	0.039	0.0082	0.0293
Sumatera Utara	Simalungun	120700	0.0113	0.0015	0.0027	0.0015	0.0021	0.0273	0.0464	0.0155	0.0294
Sumatera Utara	Karo	120900	0.0008	0.0019	0.0032	0.0015	0.0014	0.0066	0.0154	0.0059	0.008
Sumatera Utara	Labuhan Batu	120500	0.0068	0.0019	0.0032	0.0015	0.002	0.0273	0.0427	0.0119	0.0293
Sumatera Utara	Tapanuli Utara	120400	0.0068	0.0019	0.0032	0.0015	0.0014	0.0019	0.0167	0.0119	0.0033
Sumatera Barat	Pesisir Selatan	130100	0.0068	0.0015	0.0025	0.0029	0.0021	0.014	0.0298	0.0108	0.0161
Sumatera Barat	Sawah Lunto Sijunjung	130300	0.0031	0.0019	0.0027	0.0029	0.002	0.0028	0.0154	0.0077	0.0048
Sumatera Barat	Pasaman	130800	0.0031	0.0015	0.0032	0.0029	0.002	0.0273	0.04	0.0078	0.0293
Sumatera Barat	Solok	130200	0.0031	0.0015	0.0032	0.0029	0.002	0.0273	0.04	0.0078	0.0293
Riau	Bengkalis	140500	0.0031	0.0019	0.0025	0.0029	0.002	0.0028	0.0152	0.0075	0.0048
Riau	Indragiri Hilir	140200	0.0031	0.0019	0.0025	0.0029	0.002	0.014	0.0264	0.0075	0.016
Riau	Kampar	140400	0.0113	0.0006	0.0032	0.0029	0.002	0.0066	0.0266	0.0151	0.0086
Riau	Kuantan Singingi	140100	0.0015	0.0034	0.0032	0.0029	0.0021	0.0028	0.0159	0.0081	0.0049
Riau	Pelalawan	140400	0.0008	0.0019	0.0009	0.0029	0.0014	0.0273	0.0352	0.0036	0.0287
Riau	Rokan Hulu	140400	0.0008	0.0019	0.0025	0.0029	0.002	0.014	0.0241	0.0052	0.016
Jambi	Batanghari	150400	0.0015	0.0019	0.0032	0.006	0.002	0.0273	0.0419	0.0066	0.0293
Jambi	Bungo	150200	0.0008	0.0019	0.0025	0.006	0.002	0.0066	0.0198	0.0052	0.0086
Jambi	Kerinci	150100	0.0031	0.0019	0.0025	0.006	0.002	0.0066	0.0221	0.0075	0.0086
Jambi	Tanjung Jabung Timur	150500	0.0031	0.0019	0.0032	0.006	0.002	0.0028	0.019	0.0082	0.0048
Jambi	Tebo	150200	0.0015	0.0019	0.0025	0.006	0.0088	0.0028	0.0235	0.0059	0.0116
Sumatera Selatan	Muara Enim	160300	0.0015	0.0019	0.0025	0.0029	0.002	0.0066	0.0174	0.0059	0.0086
Sumatera Selatan	Musi Banyuasin	160600	0.0008	0.0019	0.0032	0.0029	0.0088	0.0273	0.0449	0.0059	0.0361
Sumatera Selatan	Musi Rawas	160500	0.0015	0.0019	0.0025	0.0029	0.0021	0.0273	0.0382	0.0059	0.0294
Sumatera Selatan	Ogan Komiring Ilir	160200	0.0031	0.0019	0.0009	0.0029	0.0021	0.0066	0.0175	0.0059	0.0087
Sumatera Selatan	Lahat	160400	0.0113	0.0019	0.0025	0.0029	0.0088	0.0273	0.0547	0.0157	0.0361
Bangka Belitung	Bangka	160700	0.0015	0.0019	0.0025	0.006	0.002	0.014	0.0279	0.0059	0.016
Bangka Belitung	Belitung	160700	0.0031	0.0019	0.0025	0.006	0.002	0.0273	0.0428	0.0075	0.0293
Bengkulu	Bengkulu Selatan	170100	0.0031	0.0015	0.0025	0.0088	0.002	0.0028	0.0207	0.0071	0.0048
Bengkulu	Rejang Lebong	170200	0.0015	0.0019	0.0025	0.0088	0.0021	0.0028	0.0196	0.0059	0.0049
Bengkulu	Bengkulu Utara	170300	0.0015	0.0019	0.0025	0.0088	0.0021	0.0028	0.0196	0.0059	0.0049
Lampung	Lampung Barat	180302	0.0031	0.0019	0.0025	0.0088	0.0021	0.014	0.0324	0.0075	0.0161
Lampung	Lampung Selatan	180101	0.0031	0.0019	0.0027	0.0088	0.0021	0.0273	0.0459	0.0077	0.0294
Lampung	Lampung Timur	180200	0.0015	0.0019	0.0027	0.0088	0.002	0.0273	0.0442	0.0061	0.0293
Lampung	Lampung Utara	180300	0.0015	0.0015	0.0025	0.0088	0.0088	0.0066	0.0297	0.0055	0.0154
Lampung	Way Kanan	180300	0.0008	0.0019	0.0032	0.0088	0.0088	0.0028	0.0263	0.0059	0.0116
Banten	Lebak	320200	0.0031	0.0019	0.0004	0.0029	0.0021	0.0028	0.0132	0.0054	0.0049
Banten	Serang	322000	0.0113	0.0019	0.0025	0.0015	0.002	0.0273	0.0465	0.0157	0.0293
Banten	Tangerang	321901	0.0113	0.0034	0.0032	0.0015	0.0014	0.0273	0.0481	0.0179	0.0287
Jawa Barat	Bekasi	321801	0.0031	0.0019	0.0025	0.0015	0.0014	0.0273	0.0377	0.0075	0.0287
Jawa Barat	Bogor	320300	0.0068	0.0019	0.0009	0.0015	0.002	0.0066	0.0197	0.0096	0.0086
Jawa Barat	Ciamis	320900	0.0015	0.0019	0.0025	0.0088	0.0021	0.0066	0.0234	0.0059	0.0087
Jawa Barat	Tasikmalaya	320800	0.0031	0.0019	0.0004	0.0088	0.0088	0.0028	0.0258	0.0054	0.0116
Jawa Barat	Garut	320700	0.0068	0.0019	0.0009	0.0088	0.0088	0.0028	0.03	0.0096	0.0116
Jawa Barat	Sumedang	321300	0.0068	0.0019	0.0025	0.0015	0.002	0.0028	0.0175	0.0112	0.0048
Jawa Barat	Bandung	320600	0.0113	0.0019	0.0025	0.0015	0.002	0.014	0.0332	0.0157	0.016
Jawa Barat	Cianjur	320500	0.0068	0.0019	0.0004	0.0088	0.0088	0.0028	0.0295	0.0091	0.0116
Jawa Barat	Sukabumi	320400	0.0031	0.0019	0.0004	0.0088	0.0088	0.0066	0.0296	0.0054	0.0154
Jawa Barat	Cirebon	321100	0.0031	0.0019	0.0009	0.006	0.0088	0.0028	0.0235	0.0059	0.0116
Jawa Barat	Kuningan	321000	0.0015	0.0019	0.0004	0.0088	0.002	0.0028	0.0174	0.0038	0.0048
Jawa Barat	Indramayu	321400	0.0031	0.0019	0.0004	0.0029	0.0088	0.0028	0.0199	0.0054	0.0116
Jawa Barat	Purwakarta	321600	0.0031	0.0015	0.0004	0.0015	0.002	0.0273	0.0358	0.005	0.0293
Jawa Barat	Karawang	321700	0.0113	0.0019	0.0025	0.0015	0.002	0.0066	0.0258	0.0157	0.0086
Jawa Barat	Subang	321500	0.0015	0.0019	0.0025	0.0029	0.0088	0.0066	0.0242	0.0059	0.0154
Jawa Tengah	Kendal	332400	0.0015	0.0019	0.0025	0.006	0.0088	0.0273	0.048	0.0059	0.0361
Jawa Tengah	Pekalongan	332600	0.0031	0.0019	0.0004	0.006	0.0088	0.0028	0.023	0.0054	0.0116
Jawa Tengah	Pemalang	332700	0.0031	0.0019	0.0004	0.006	0.0021	0.0066	0.0201	0.0054	0.0087
Jawa Tengah	Tegal	332800	0.0031	0.0019	0.0009	0.006	0.0088	0.0028	0.0235	0.0059	0.0116
Jawa Tengah	Jepara	332000	0.0008	0.0019	0.0032	0.006	0.0021	0.0028	0.0168	0.0059	0.0049
Jawa Tengah	Kudus	331900	0.0015	0.0019	0.0032	0.006	0.0088	0.014	0.0354	0.0066	0.0228
Jawa Tengah	Banyumas	330200	0.0031	0.0019	0.0025	0.006	0.0088	0.0028	0.0251	0.0075	0.0116
Jawa Tengah	Cilacap	330100	0.0031	0.0019	0.0025	0.0029	0.0088	0.0066	0.0258	0.0075	0.0154
Jawa Tengah	Wonosobo	330700	0.0008	0.0019	0.0009	0.006	0.0088	0.0028	0.0212	0.0036	0.0116
Jawa Tengah	Kebumen	330500	0.0031	0.0015	0.0009	0.0088	0.0088	0.0019	0.025	0.0055	0.0107
Jawa Tengah	Boyolali	330900	0.0008	0.0019	0.0027	0.006	0.0021	0.0028	0.0163	0.0054	0.0049
Jawa Tengah	Sukoharjo	331100	0.0031	0.0019	0.0025	0.006	0.002	0.0028	0.0183	0.0075	0.0048
Jawa Tengah	Karanganyar	331300	0.0008	0.0019	0.0009	0.006	0.002	0.0028	0.0144	0.0036	0.0048
Jawa Tengah	Klaten	331000	0.0031	0.0019	0.0025	0.006	0.0021	0.0028	0.0184	0.0075	0.0049
Jawa Tengah	Magelang	330800	0.0015	0.0019	0.0025	0.006	0.0021	0.0028	0.0168	0.0059	0.0049
DI Yogyakarta	Bantul	340200	0.0015	0.0019	0.0025	0.006	0.0021	0.0028	0.0168	0.0059	0.0049
DI Yogyakarta	Gunung Kidul	340300	0.0008	0.0019	0.0025	0.006	0.0088	0.0066	0.0266	0.0052	0.0154
Jawa Timur	Blitar	350500	0.0015	0.0019	0.0009	0.0088	0.0088	0.0028	0.0247	0.0043	0.0116
Jawa Timur	Kediri	350600	0.0031	0.0019	0.0027	0.0029	0.0021	0.0028	0.0155	0.0077	0.0049
Jawa Timur	Magetan	352000	0.0031	0.0019	0.0025	0.0088	0.0021	0.0066	0.025	0.0075	0.0087
Jawa Timur	Ponorogo	350200	0.0008	0.0019	0.0025	0.0088	0.002	0.0028	0.0188	0.0052	0.0048
Jawa Timur	Tulungagung	350400	0.0031	0.0019	0.0025	0.0088	0.0088	0.0028	0.0279	0.0075	0.0116
Jawa Timur	Mojokerto	351600	0.0031	0.0019	0.0027	0.0029	0.002	0.0028	0.0154	0.0077	0.0048
Jawa Timur	Pamekasan	352800	0.0015	0.0019	0.0025	0.006	0.0088	0.0028	0.0235	0.0059	0.0116
Jawa Timur	Bangkalan	352600	0.0031	0.0019	0.0004	0.0029	0.002	0.0028	0.0131	0.0054	0.0048
Jawa Timur	Pasuruan	351400	0.0031	0.0025	0.0009	0.0022	0.0021	0.0066	0.0174	0.0065	0.0087
Jawa Timur	Sidoarjo	351500	0.0031	0.0019	0.0027	0.0022	0.002	0.0066	0.0185	0.0077	0.0086
Jawa Timur	Gresik	352500	0.0113	0.0019	0.0027	0.006	0.002	0.0273	0.0512	0.0159	0.0293
Jawa Timur	Jombang	351700	0.0031	0.0019	0.0025	0.0022	0.0021	0.0028	0.0146	0.0075	0.0049
Jawa Timur	Lamongan	352400	0.0031	0.0019	0.0025	0.0088	0.0088	0.0028	0.0279	0.0075	0.0116
Jawa Timur	Banyuwangi	351000	0.0031	0.0019	0.0025	0.0088	0.0088	0.0028	0.0279	0.0075	0.0116
Jawa Timur	Bondowoso	351100	0.0015	0.0019	0.0004	0.0088	0.0088	0.0028	0.0242	0.0038	0.0116
Jawa Timur	Situbondo	351200	0.0015	0.0025	0.0009	0.0088	0.0021	0.0028	0.0186	0.0049	0.0049
Jawa Timur	Jember	350900	0.0015	0.0019	0.0009	0.006	0.0088	0.0028	0.0219	0.0043	0.0116
Bali	Badung	510301	0.0031	0.0025	0.0009	0.0029	0.002	0.0028	0.0142	0.0065	0.0048
Bali	Bangli	510600	0.0008	0.0019	0.0009	0.0029	0.002	0.0028	0.0113	0.0036	0.0048
Bali	Buleleng	510800	0.0008	0.0019	0.0025	0.0029	0.0021	0.0028	0.013	0.0052	0.0049
Bali	Gianyar	510400	0.0015	0.0019	0.0025	0.0029	0.002	0.0028	0.0136	0.0059	0.0048
Bali	Jembrana	510100	0.0031	0.0019	0.0009	0.0029	0.0021	0.0028	0.0137	0.0059	0.0049
Bali	Tabanan	510200	0.0008	0.0019	0.0009	0.0029	0.002	0.0028	0.0113	0.0036	0.0048
Bali	Klungkung	510500	0.0031	0.0019	0.0009	0.0029	0.002	0.0273	0.0381	0.0059	0.0293
Bali	Karangasem	510700	0.0008	0.0019	0.0009	0.0029	0.002	0.0019	0.0104	0.0036	0.0039
Kalimantan Barat	Kapuas Hulu	610600	0.0008	0.0019	0.0025	0.0029	0.0014	0.0028	0.0123	0.0052	0.0042
Kalimantan Barat	Ketapang	610400	0.0031	0.0019	0.0025	0.0029	0.002	0.0066	0.019	0.0075	0.0086
Kalimantan Barat	Pontianak	610200	0.0015	0.0015	0.0025	0.0029	0.002	0.0273	0.0377	0.0055	0.0293
Kalimantan Barat	Sambas	610100	0.0015	0.0019	0.0025	0.0029	0.0021	0.014	0.0249	0.0059	0.0161
Kalimantan Barat	Sanggau	610300	0.0015	0.0019	0.0027	0.0029	0.002	0.0273	0.0383	0.0061	0.0293
Kalimantan Tengah	Barito Selatan	620400	0.0008	0.0019	0.0032	0.0029	0.0014	0.0273	0.0375	0.0059	0.0287
Kalimantan Tengah	Barito Utara	620500	0.0008	0.0019	0.0032	0.0029	0.0014	0.0066	0.0168	0.0059	0.008
Kalimantan Tengah	Kapuas	620300	0.0015	0.0019	0.0025	0.0029	0.002	0.0028	0.0136	0.0059	0.0048
Kalimantan Selatan	Hulu Sungai Selatan	630600	0.0113	0.0019	0.0009	0.0029	0.002	0.0028	0.0218	0.0141	0.0048
Kalimantan Selatan	Hulu Sungai Tengah	630700	0.0113	0.0025	0.0027	0.0029	0.002	0.0028	0.0242	0.0165	0.0048
Kalimantan Selatan	Hulu Sungai Utara	630800	0.0008	0.0019	0.0009	0.0029	0.002	0.0028	0.0113	0.0036	0.0048
Kalimantan Selatan	Tabalong	630900	0.0031	0.0019	0.0025	0.0029	0.0014	0.0273	0.0391	0.0075	0.0287
Kalimantan Selatan	Tanah Laut	630100	0.0008	0.0019	0.0025	0.0029	0.002	0.0066	0.0167	0.0052	0.0086
Kalimantan Selatan	Tapin	630500	0.0015	0.0019	0.0025	0.0029	0.002	0.0028	0.0136	0.0059	0.0048
Kalimantan Timur	Berau	640300	0.0008	0.0019	0.0027	0.0015	0.0014	0.0273	0.0356	0.0054	0.0287
Kalimantan Timur	Kutai	640200	0.0008	0.0019	0.0027	0.0015	0.002	0.014	0.0229	0.0054	0.016
Kalimantan Timur	Pasir	640100	0.0008	0.0019	0.0025	0.0015	0.0014	0.0066	0.0147	0.0052	0.008
Kalimantan Timur	Bulungan	640400	0.0008	0.0019	0.0025	0.0015	0.002	0.0273	0.036	0.0052	0.0293
Kalimantan Timur	Kutai Timur	640200	0.0008	0.0019	0.0025	0.0015	0.0014	0.0273	0.0354	0.0052	0.0287
Kalimantan Timur	Nunukan	640400	0.0031	0.0034	0.0025	0.0015	0.002	0.0019	0.0144	0.009	0.0039
Sulawesi Utara	Minahasa	710300	0.0031	0.0019	0.0032	0.0022	0.002	0.0028	0.0152	0.0082	0.0048
Sulawesi Utara	Sangihe	710400	0.0008	0.0019	0.0025	0.0022	0.002	0.0028	0.0122	0.0052	0.0048
Gorontalo	Gorontalo	710100	0.0031	0.0019	0.0009	0.0029	0.002	0.0028	0.0136	0.0059	0.0048
Sulawesi Tengah	Banggai	720100	0.0008	0.0019	0.0025	0.0029	0.002	0.0028	0.0129	0.0052	0.0048
Sulawesi Tengah	Toli-Toli	720400	0.0015	0.0019	0.0025	0.0029	0.0021	0.0066	0.0175	0.0059	0.0087
Sulawesi Tengah	Donggala	720300	0.0008	0.0019	0.0009	0.0029	0.0088	0.0066	0.0219	0.0036	0.0154
Sulawesi Tengah	Morowali	720200	0.0068	0.0015	0.0025	0.0029	0.0021	0.014	0.0298	0.0108	0.0161
Sulawesi Tengah	Poso	720200	0.0008	0.0019	0.0027	0.0029	0.002	0.0273	0.0376	0.0054	0.0293
Sulawesi Tenggara	Buton	740100	0.0031	0.0006	0.0025	0.0029	0.002	0.0028	0.0139	0.0062	0.0048
Sulawesi Tenggara	Kolaka	740400	0.0015	0.0019	0.0032	0.0029	0.002	0.0273	0.0388	0.0066	0.0293
Sulawesi Selatan	Gowa	730600	0.0113	0.0019	0.0025	0.0029	0.002	0.0066	0.0272	0.0157	0.0086
Sulawesi Selatan	Takalar	730500	0.0113	0.0015	0.0009	0.0029	0.0088	0.0066	0.032	0.0137	0.0154
Sulawesi Selatan	Jeneponto	730400	0.0113	0.0015	0.0009	0.0029	0.0014	0.0066	0.0246	0.0137	0.008
Sulawesi Selatan	Bantaeng	730300	0.0031	0.0019	0.0004	0.0029	0.002	0.0066	0.0169	0.0054	0.0086
Sulawesi Selatan	Sinjai	730700	0.0015	0.0019	0.0025	0.0029	0.002	0.0066	0.0174	0.0059	0.0086
Sulawesi Selatan	Selayar	730100	0.0113	0.0019	0.0004	0.0029	0.0021	0.0066	0.0252	0.0136	0.0087
Sulawesi Selatan	Bone	731100	0.0113	0.0019	0.0025	0.0029	0.0088	0.014	0.0414	0.0157	0.0228
Sulawesi Selatan	Maros	730800	0.0113	0.0019	0.0009	0.0029	0.0021	0.0066	0.0257	0.0141	0.0087
Sulawesi Selatan	Pangkep	730900	0.0008	0.0019	0.0009	0.0029	0.0021	0.0273	0.0359	0.0036	0.0294
Sulawesi Selatan	Barru	731000	0.0113	0.0015	0.0004	0.0029	0.002	0.0066	0.0247	0.0132	0.0086
Sulawesi Selatan	Pinrang	731500	0.0113	0.0019	0.0027	0.0029	0.0014	0.0066	0.0268	0.0159	0.008
Sulawesi Selatan	Majene	732000	0.0113	0.0015	0.0025	0.0029	0.002	0.0028	0.023	0.0153	0.0048
Sulawesi Selatan	Enrekang	731600	0.0068	0.0019	0.0009	0.0029	0.0021	0.0066	0.0212	0.0096	0.0087
Sulawesi Selatan	Tana Toraja	731800	0.0113	0.0006	0.0009	0.0029	0.0014
Sulawesi Selatan	Luwu	731700	0.0113	0.0006	0.0027	0.0029	0.002	0.0273	0.0468	0.0146	0.0293
Sulawesi Selatan	Luwu Utara	731700	0.0068	0.0019	0.0025	0.0029	0.002	0.0028	0.0189	0.0112	0.0048
Nusa Tenggara Barat	Bima	520600	0.0031	0.0015	0.0009	0.006	0.002	0.0028	0.0163	0.0055	0.0048
Nusa Tenggara Barat	Lombok Barat	520101	0.0008	0.0019	0.0004	0.006	0.0088	0.0028	0.0207	0.0031	0.0116
Nusa Tenggara Barat	Dompu	520500	0.0031	0.0015	0.0025	0.006	0.002	0.0028	0.0179	0.0071	0.0048
Nusa Tenggara Barat	Lombok Timur	520300	0.0015	0.0019	0.0004	0.006	0.0088	0.0028	0.0214	0.0038	0.0116
Nusa Tenggara Timur	Ende	531000	0.0015	0.0019	0.0004	0.006	0.0088	0.0019	0.0205	0.0038	0.0107
Nusa Tenggara Timur	Flores Timur	530800	0.0008	0.0015	0.0004	0.006	0.002	0.0028	0.0135	0.0027	0.0048
Nusa Tenggara Timur	Manggarai	531200	0.0008	0.0015	0.0004	0.006	0.002	0.0019	0.0126	0.0027	0.0039
Nusa Tenggara Timur	Ngada	531100	0.0008	0.0015	0.0025	0.006	0.002	0.0028	0.0156	0.0048	0.0048
Nusa Tenggara Timur	Timur Tengah Selatan	530400	0.0008	0.0019	0.0004	0.006	0.002	0.0028	0.0139	0.0031	0.0048
Nusa Tenggara Timur	Timur Tengah Utara	530500	0.0008	0.0015	0.0004	0.006	0.0014	0.0019	0.012	0.0027	0.0033
Nusa Tenggara Timur	Belu	530600	0.0008	0.0006	0.0009	0.006	0.0021	0.0019	0.0123	0.0023	0.004
Nusa Tenggara Timur	Sumba Barat	530100	0.0008	0.0006	0.0009	0.006	0.002	0.0019	0.0122	0.0023	0.0039
Irian Jaya Barat	Fak-Fak	820500				0.0015	0.0014		0.0029
Irian Jaya Barat	Manokwari	820700	0.0008	0.0019	0.0004	0.0015	0.0014	0.014	0.02	0.0031	0.0154
Irian Jaya Barat	Sorong	820600	0.0015	0.0019	0.0027	0.0015	0.0014	0.0273	0.0363	0.0061	0.0287
Papua	Jayawijaya	820200	0.0008	0.0019	0.0004	0.0015	0.0088	0.0028	0.0162	0.0031	0.0116
Irian Jaya Barat	Mimika	820500	0.0113	0.0034	0.0032	0.0015	0.0014	0.0028	0.0236	0.0179	0.0042
