# Supplementary material for: Democratization, leader education and growth: firm-level evidence from Indonesia
Source: Springer Nature journal article supplement (doi:10.1007/s10887-022-09221-5), 2023-02-15
Supplement: MOESM2 [file kppod_variable labels etc.xlsx]

## Sheet: helpfile kppod
class_bahasa	class_eng	subclass_bahasa	subclass_eng	varname_bahasa	varname_eng	varname_in_otherexcelfiles
Infrastruktur Fisik	Physical Infrastructure	Ketersediaan Infrastruktur Fisik	Availability of Physical Infrastructure	Jalan	Availability of Streets	av_street
Infrastruktur Fisik	Physical Infrastructure	Ketersediaan Infrastruktur Fisik	Availability of Physical Infrastructure	Pelabuhan Laut	Availability of Sea Ports	av_seaport
Infrastruktur Fisik	Physical Infrastructure	Ketersediaan Infrastruktur Fisik	Availability of Physical Infrastructure	Pelabuhan Udara	Availability of Airport	av_airport
Infrastruktur Fisik	Physical Infrastructure	Ketersediaan Infrastruktur Fisik	Availability of Physical Infrastructure	Telepon	Availability of Telephone Service	av_telserv
Infrastruktur Fisik	Physical Infrastructure	Ketersediaan Infrastruktur Fisik	Availability of Physical Infrastructure	Listrik	Availability of Electricity Service	av_elecserv
Infrastruktur Fisik	Physical Infrastructure	Ketersediaan Infrastruktur Fisik	Availability of Physical Infrastructure	Sub Total Ketersediaan Infrastruktur	Subtotal Availability of Physical Infrastructure	subtot_avinfra
Infrastruktur Fisik	Physical Infrastructure	Kualitas Infrastruktur Fisik	Quality of Physical Infrastructure	Jalan	Quality of Streets	qu_street
Infrastruktur Fisik	Physical Infrastructure	Kualitas Infrastruktur Fisik	Quality of Physical Infrastructure	Pelabuhan Laut	Quality of Sea Ports	qu_seaport
Infrastruktur Fisik	Physical Infrastructure	Kualitas Infrastruktur Fisik	Quality of Physical Infrastructure	Pelabuhan Udara	Quality of Airport	qu_airport
Infrastruktur Fisik	Physical Infrastructure	Kualitas Infrastruktur Fisik	Quality of Physical Infrastructure	Telepon	Quality of Telephone Service	qu_telserv
Infrastruktur Fisik	Physical Infrastructure	Kualitas Infrastruktur Fisik	Quality of Physical Infrastructure	Listrik	Quality of Electricity Service	qu_elecserv
Infrastruktur Fisik	Physical Infrastructure	Kualitas Infrastruktur Fisik	Quality of Physical Infrastructure	Sub Total Kualitas Infrastruktur	Subtotal Quality of Physical Infrastructure	subtot_quinfra
Infrastruktur Fisik	Physical Infrastructure			TOTAL SCORE	Total Score Infrastructure	tot_infra
Kelembagaan	Institutions	Aparatur & Pelayanan	Apparatus and Service	Birokrasi	Service Procedure	serv_proc
Kelembagaan	Institutions	Aparatur & Pelayanan	Apparatus and Service	Penyalahgunaan wewenang	Abuse of Authority	abuse_auth
Kelembagaan	Institutions	Aparatur & Pelayanan	Apparatus and Service	Sub Total Aparat & Pelayanan	Subtotal Apparatus & Service	subtot_appserv
Kelembagaan	Institutions			Peraturan Daerah	Regional Policy and Regulation	rpolreg
Kelembagaan	Institutions	Keuangan Daerah	Regional Finance	Retribusi/ Pajak	Retribution/taxes	retrib_tax
Kelembagaan	Institutions	Keuangan Daerah	Regional Finance	Pemb./ APBD	Development budget / APDB	devbudget_apdb
Kelembagaan	Institutions	Keuangan Daerah	Regional Finance	Sub Total Keuangan Daerah	Subtotal Regional Finance	subtot_regfin
Kelembagaan	Institutions	Kepastian Hukum	Law Certainty	Konsistensi Peraturan	Consistency of Regulations	reg_cons
Kelembagaan	Institutions	Kepastian Hukum	Law Certainty	Penegakan Hukum	Law Enforcement	law_enforce
Kelembagaan	Institutions	Kepastian Hukum	Law Certainty	Pungli Luar Birokrasi	Illegal Levy outside Bureaucracy	illegal_levy
Kelembagaan	Institutions	Kepastian Hukum	Law Certainty	Eksekutif - Legislatif	Executive-Legislative Relations	exec_leg
Kelembagaan	Institutions	Kepastian Hukum	Law Certainty	Sub Total Kepastian Hukum	Subtotal Law Certainty	subtot_lawcert
Kelembagaan	Institutions			TOTAL SCORE	Total Score Institutional Quality	tot_inst
Sosial Politik	Social Politics	Keamanan	Security	Gangguan Usaha	Business Security	bus_sec
Sosial Politik	Social Politics	Keamanan	Security	Gangguan Masyarakat	Community Security	comm_sec
Sosial Politik	Social Politics	Keamanan	Security	Kecepatan Aparat	Quick response of Security Officers in handling security issues	quickreply
Sosial Politik	Social Politics	Keamanan	Security	Subtotal Keamanan	Subtotal Security	subtot_sec
Sosial Politik	Social Politics	Sosial Politik	Socio-Political Condition	Partisipasi Masyarakat	Community Participation	part_comm
Sosial Politik	Social Politics	Sosial Politik	Socio-Political Condition	Konflik Masyarakat	Social Conflict	soc_conflict
Sosial Politik	Social Politics	Sosial Politik	Socio-Political Condition	Stabilitas Politik	Political Stability	pol_stab
Sosial Politik	Social Politics	Sosial Politik	Socio-Political Condition	Unjuk Rasa	Intensity of Demonstrations	demo_intens
Sosial Politik	Social Politics	Sosial Politik	Socio-Political Condition	Subtotal Sosial Politik	Subtotal Socio-Political Condition	subtot_socpol
Sosial Politik	Social Politics	Budaya	Socio-Cultural Condition	Terbuka	Community openness towards Business Community	open_comm_bus
Sosial Politik	Social Politics	Budaya	Socio-Cultural Condition	Non Diskriminasi	Absence of Discriminatory Culture	nodiscr
Sosial Politik	Social Politics	Budaya	Socio-Cultural Condition	Adat-istiadat	Society Customs	soc_customs
Sosial Politik	Social Politics	Budaya	Socio-Cultural Condition	Etos Kerja	Community's Working Ethos	comm_workethos
Sosial Politik	Social Politics	Budaya	Socio-Cultural Condition	Subtotal Budaya	Subtotal Socio-Cultural Condition	subtot_soccul
Sosial Politik	Social Politics	Budaya		TOTAL SCORE	Total Score Social Politics	tot_socpol
Ekonomi Daerah	Regional Economy	Potensi Ekonomi	Economic Potential	PDRB Perkapita	Gross Domestic Regional Product (PDRB) per capita	PDRB_cap
Ekonomi Daerah	Regional Economy	Potensi Ekonomi	Economic Potential	Tumbuh	Gross Domestic Regional Product (PDRB) growth rate	PDRB_growth
Ekonomi Daerah	Regional Economy	Potensi Ekonomi	Economic Potential	IPM	Human Development Index	hdi
Ekonomi Daerah	Regional Economy	Potensi Ekonomi	Economic Potential	Sub Total Potensi Ekonomi	Subtotal Economic Potential	subtot_econpot
Ekonomi Daerah	Regional Economy	Struktur Ekonomi	Economic Structure	Nilai Tambah Primer	Value Added of Primary Sector	valadd_prim
Ekonomi Daerah	Regional Economy	Struktur Ekonomi	Economic Structure	Nilai Tambah Sekunder	Value Added of Secondary Sector	valadd_sec
Ekonomi Daerah	Regional Economy	Struktur Ekonomi	Economic Structure	Nilai Tambah Tersier	Value Added of Tertiary Sector	valadd_tert
Ekonomi Daerah	Regional Economy	Struktur Ekonomi	Economic Structure	Sub Total Struktur Ekonomi	Subtotal Economic Structure	subtot_econstr
Ekonomi Daerah	Regional Economy			TOTAL SCORE	Total Score Economy	tot_econ
Tenaga Kerja & Produktivitas	Labor & Productivity	Ketersediaan Tenaga Kerja	Manpower Availability	Usia Produktif	Productive Age Population / Total Population	prodage_pop
Tenaga Kerja & Produktivitas	Labor & Productivity	Ketersediaan Tenaga Kerja	Manpower Availability	SLTP	Workers with Junior High Educ / Total Labor Force	jhighw_totw
Tenaga Kerja & Produktivitas	Labor & Productivity	Ketersediaan Tenaga Kerja	Manpower Availability	Pencari Kerja	Job Seekers / Labor Force	seek_labforce
Tenaga Kerja & Produktivitas	Labor & Productivity	Ketersediaan Tenaga Kerja	Manpower Availability	Sub Total Ketersediaan Tenaga Kerja	Subtotal Manpower Availability	subtot_manpav
Tenaga Kerja & Produktivitas	Labor & Productivity	Biaya Tenaga Kerja	Labor Cost	UMP/IHK	Minimum Wage / CPI	minwage_cpi
Tenaga Kerja & Produktivitas	Labor & Productivity	Biaya Tenaga Kerja	Labor Cost	Upah Aktual/IHK	Actual Salary / CPI	salary_cpi
Tenaga Kerja & Produktivitas	Labor & Productivity	Biaya Tenaga Kerja	Labor Cost	Sub Total Biaya Tenaga Kerja	Subtotal Labor Cost	subtot_labcost
Tenaga Kerja & Produktivitas	Labor & Productivity	Produktivitas dan Kualitas Tenaga Kerja	Labor Productivity & Quality	Produktivitas	Value Added of MF / Workers in MF	Mfvaladd_Mfwork
Tenaga Kerja & Produktivitas	Labor & Productivity			TOTAL SCORE	Total Score Labor & Productivity	tot_labprod
