# Supplementary material for: Democratization, leader education and growth: firm-level evidence from Indonesia
Source: Springer Nature journal article supplement (doi:10.1007/s10887-022-09221-5), 2023-02-15
Supplement: MOESM2 [file mayor-level corruption outcomes and sources.xlsx]

## Sheet: mayor-level corruption
District name	Name of first democratic mayor	Corruption status (0=nothing, 1=res, 2=inv, 3=def, 4=conv, 5=acq)	Prison sentence duration in years (if applicable)	Source/Source type	Google Source(s)
AGAM	Drs. ARISTO MUNANDAR	0
BADUNG	A.A NGURAH OKA RATMADI, SH	0
BANJARNEGARA	Drs. DJASRI, ST., MM.	0
BANYUMAS	H.M. ARIS SETIONO, SH, S.IP	1		Newspaper via Google Search	http://ortax.org/ortax/?mod=berita&page=show&id=3615
BARITO KUALA	Drs. EDDI SUKARMA M.Si	0
BARRU	Drs. ANDI MUHAMMAD RUM	0
BERAU	Drs. H. MASDJUNI	5		ICW 2008, Newspaper via Google Search	https://www.liputan6.com/news/read/128999/mantan-bupati-berau-divonis-bebas
BLITAR	Drs. IMAM MUHADI, MBA	4	15	ICW 2008
BLORA	Ir. BASUKI WIDODO	0
BOJONEGORO	H. MUHAMMAD SANTOSO	4	5	KPK, Newspaper via Google Search	https://www.suarabanyuurip.com/index.php?/kabar/baca/mantan-bupati-santoso-dijebloskan-ke-lapas-bojonegoro
BONE	H. ANDI MUH. IDRIS GALIGO	0
BULUKUMBA	Drs. H. A. PATABAI PABOKARI	0
CIANJUR	Ir. H. WASIDI SWASTOMO, M.Si.	0
CILACAP	H. PROBO YULASTORO, S.Sos, MM	4	7	Newspaper via Google Search	http://www.kejari-cilacap.go.id/2018/03/mantan-bupati-cilacap-probo-yulastoro.html
DEMAK	Dra. Hj. ENDANG SETYANINDYAH	4	1	Newspaper via Google Search	https://jateng.tribunnews.com/2014/02/16/ini-kronologi-penangkapan-mantan-bupati-demak-endang-setyaningdyah
GIANYAR	A.A.G. AGUNG BHARATA, SH	0
GROBOGAN	AGUS SUPRIYANTO, SE	3		Newspaper via Google Search	https://www.solopos.com/korupsi-dprd-grobogan-dua-mantan-sekwan-dituntut-2-tahun-penjara-170100 AND https://antikorupsijateng.wordpress.com/category/grobogan/page/35/
GUNUNG KIDUL	Drs. YOETIKNO	4	2.66666	ICW 2008
INDRAMAYU	H. IRIANTO MAHFUDZ SIDIK	4	4	Newspaper via Google Search	https://news.detik.com/berita/d-3205345/jejak-mantan-bupati-yance-ditangkap-bebas-dan-dihukum-4-tahun-penjara
JEMBER	Drs. H. SAMSUL HADI SISWOYO	4	6	ICW 2008, Newspaper via Google Search	http://m.beritajatim.com/sorotan/262007/abah_samsul_berpulang.html
JEPARA	Drs. HENDRO MARTOJO, MM	0
KAPUAS HULU	Drs. H. ABANG TAMBUL HUSIN	3		ICW 2008, Newspaper via Google Search	https://insidepontianak.com/2020/03/09/jpu-hadirkan-dua-saksi-ahli-dalam-kasus-dugaan-korupsi-tambul-husin/
KARANG ASEM	Drs. GDE SUMANTARA ADY P	0
KARANGANYAR	Hj. RINA IRIANI SRI RATNANINGSIH, S.Pd.	4	6	Newspaper via Google Search	https://www.tribunnews.com/regional/2020/08/21/perjalanan-kasus-korupsi-mantan-bupati-karanganyar-rina-iriani-tetap-modis-hingga-hibahkan-masjid
KEBUMEN	Dra. RUSTRININGSIH	0
KEDIRI	Ir. H. SUTRISNO	0
KLATEN	HARYANTO	5		Newspaper via Google Search	https://news.okezone.com/read/2016/12/30/512/1579557/korupsi-dan-dinasti-politik-di-klaten AND https://koran.tempo.co/read/nusa/57243/mantan-bupati-tersangka-korupsi-buku?
KOTA AMBON	Drs. M. J. PAPILAYA, MS	4	1	ICW 2008, Newspaper via Google Search	https://regional.kompas.com/read/2014/10/28/13312711/Korupsi.Mantan.Wali.Kota.Ambon.Divonis.1.Tahun.Penjara
KOTA BALIKPAPAN	H. IMDAAD HAMID, SE	0
KOTA BANDAR LAMPUNG	Drs. H. SUHARTO	0
KOTA BEKASI	H. AKHMAD ZURFAIK HR, S.Sos.	0
KOTA BENGKULU	H. A. CHALIK EFFENDI, SE	3		ICW 2008, Newspaper via Google Search	https://www.liputan6.com/news/read/96163/wali-kota-bengkulu-diperiksa AND https://www.jpnn.com/news/mantan-walikota-bengkulu-akan-dijemput-paksa AND https://news.detik.com/berita/d-192030/korupsi-dprd--walikota-bengkulu-dilaporkan-ke-kpk
KOTA BINJAI	H.M. ALI UMRI, SH	0
KOTA BLITAR	Drs. DJAROT SAIFUL HIDAYAT, MS	0
KOTA CIREBON	SUBARDI	0
KOTA JAYAPURA	Drs. MANASE ROBERT KAMBU	0
KOTA KUPANG	SAMUEL KRISTIAN LERIK	3		Newspaper via Google Search (Original source = ICW)	https://news.detik.com/berita/d-832726/3-gubernur--5-walikota-tersandung-kasus-korupsi
KOTA MAGELANG	H. FAHRIYANTO	4	2.50000	Newspaper via Google Search	https://regional.kompas.com/read/2013/09/30/2228251/Korupsi.Eks.Wali.Kota.Magelang.Divonis.4.Kali#:~:text=SEMARANG, KOMPAS.com - Mantan,Pidana Korupsi (Tipikor) Semarang.&text=Selain itu, majelis hakim juga,atau setara 2 bulan penjara.
KOTA MANADO	Drs. WIMPIE FREDERIK	5		ICW 2008, Newspaper via Google Search	https://news.detik.com/berita/d-401625/diduga-korupsi-walikota-manado-dilaporkan-ke-kpk
KOTA MATARAM	H. MOCH. RUSLAN, SH	0			https://nasional.tempo.co/read/133798/wali-kota-bima-diduga-korupsi-rp-19-miliar/full&view=ok
KOTA MEDAN	Drs. H. ABDILLAH, SE,Ak. MBA	4	5	KPK, Newspaper via Google Search	https://nasional.kompas.com/read/2008/09/22/12232833/Walikota.Medan.Divonis.5.tahun.Penjara#:~:text=JAKARTA%2C%20RABU%20%2D%20Walikota%20Medan%20(,penjara%20dan%20denda%20Rp250%20juta.&text=%22Menyatakan%20Abdillah%20terbukti%20secara%20sah,Rp250%20juta%20subsidair%206%20bulan.
KOTA PEKALONGAN	Drs. H. SAMSUDIAT	0
KOTA PEKANBARU	Drs. H. HERMAN ABDULLAH, MM	0
KOTA PEMATANG SIANTAR	Drs. MARIM PURBA (diberhentikan sementara)	4	no info	Newspaper via Google Search	https://medanbisnisdaily.com/news/online/read/2019/04/23/73235/buron_11_tahun_terpidana_kasus_korupsi_pasar_horas_siantar_ditangkap_di_warung_kopi/ AND (initially, suspect) https://nasional.tempo.co/read/8999/wali-kota-pematang-siantar-jadi-tersangka-korupsi
KOTA SALATIGA	H. TOTO MINTARTO	3		Newspaper via Google Search	https://edukasi.kompas.com/read/2011/02/16/18423642/penuntutan.kasus.buku.ajar.dihentikan AND https://www.kompasiana.com/bamset2014/591eb7204423bd1957c635db/kasus-korupsi-rp74-miliar-di-salatiga-bisa-dibuka-kembali?page=all
KOTA SAMARINDA	Drs. H. AHMAD AMINS, MM	3		Newspaper via Google Search	https://news.detik.com/berita/d-1569894/kejari-periksa-mantan-wali-kota-samarinda-atas-dugaan-korupsi-
KOTA SEMARANG	H. SUAWI SUTARIP, SH	3		Newspaper via Google Search	https://www.liputan6.com/news/read/189409/wali-kota-semarang-jadi-tersangka-korupsi-apbd
KOTA SOLOK	Drs. YUMLER LAHAR	3		Newspaper via Google Search	https://nasional.tempo.co/read/46247/dugaan-korupsi-rp-13-miliar-wali-kota-solok-jadi-tersangka
KOTA SUKABUMI	H. MOH. MUSLIKH ABDUSSYUKUR, SH	0
KOTA SURAKARTA	SLAMET SURYANTO	4	1.25000	ICW 2008
KOTA TANJUNG BALAI	dr. H. SUTRISNO HADI, Sp.OG	3		Newspaper via Google Search	https://nasional.tempo.co/read/150679/walikota-tanjung-balai-tersangka-dugaan-korupsi
KOTA TEBING TINGGI	Ir. H. ABDILLAH SE, Ak, MBA.	0
KOTA YOGYAKARTA	H. HERRI ZUDIANTO, SE.Akt, MM	0			https://koran.tempo.co/read/berita-utama-jateng/341678/herry-zudianto-diperiksa-kejaksaan?
KULON PROGO	H. TOYO SANTOSO DIPO, B. Sc.	0
LAMPUNG BARAT	Ir. ERWIN NIZAR T. M.Si.	0
LIMA PULUH KOTA	DR. ARLIS M. DATUK S. MARAJO	5		ICW 2008
LOMBOK TENGAH	Drs. LALU SUHAIMI	0			https://nasional.tempo.co/read/133798/wali-kota-bima-diduga-korupsi-rp-19-miliar/full&view=ok
MAJENE	Drs. H. MUHAMMAD DARWIS	0
MOJOKERTO	Drs. AHMADY M. Si	4	9	Newspaper via Google Search	https://suaramojokerto.com/2020/05/27/tiga-mantan-bupati-dan-walikota-mojokerto-lebaran-di-penjara-kapan-bebas/ (for suspect, see https://news.detik.com/berita-jawa-timur/d-1858548/korupsi-rp-40-miliar-eks-bupati-dan-wabup-mojokerto-dijebloskan-medaeng )
NGANJUK	Ir. SITI NURHAYATI, MM.	0
NGAWI	DR. H. HARSONO	0
PACITAN	H. SUTRISNO	0
PAMEKASAN	Drs. AHMAD SYAFI'I	4	2.666666	ICW 2007, Newspaper via Google Search	https://news.detik.com/berita-jawa-timur/d-3775656/bupati-pamekasan-non-aktif-divonis-2-tahun-8-bulan-penjara
PANDEGLANG	H. ACHMAD DIMYATI NATAKUSUMA	3		Newspaper via Google Search	https://indopolitika.com/pembobolan-bank-bjb-dan-tindak-asusila-anak-dibawah-umur-jadi-ganjalan-dimyati-natakusumah-duduk-di-kursi-wakil-ketua-mpr/
PANGKAJENE DAN KEPULAUAN	Drs. H A. GAFFAR PATAPP	0
PATI	TASIMAN	4	1.500000	Newspaper via Google Search	https://news.detik.com/berita/d-1934731/terjerat-korupsi-apbd-mantan-bupati-pati-divonis-15-tahun-penjara
PEKALONGAN	Drs. AMAT ANTONO	0
PEMALANG	H.M. MACHROES, SH.	1		Newspaper via Google Search	https://antikorupsijateng.wordpress.com/category/pemalang/page/2/	Note: this is not a news source, but they indicate a source, Suara Merdeka, which is a news source
PESISIR SELATAN	Drs. DARIZAL BASIR, MBA	0
PIDIE	Ir. H. ABDULLAH YAHYA, MS	0
PONOROGO	HM. MARKUM SINGODIMEJO	3		Newspaper via Google Search (Original source = ICW)	https://news.detik.com/berita/d-299313/daftar-38-anggota-dpr-ri-yang-diduga-terlibat-korupsi
PROBOLINGGO	Drs. H. AMINUDDIN	0
PURBALINGGA	Drs. TRIYONO BUDI SASONGKO	0
PURWAKARTA	Drs. H. LILY HAMBALI HASAN	4	2	ICW 2007, Newspaper via Google Search	https://nasional.tempo.co/read/163209/ma-tolak-kasasi-lili-hambali
PURWOREJO	H. MARSAID, SH, M.Si.	4	4	Newspaper via Google Search	https://nasional.kompas.com/read/2008/11/11/1906352/korupsi.mantan.bupati.purworejo.divonis.empat.tahun.
REMBANG	HENDARSONO	4	3	Newspaper via Google Search	https://nasional.tempo.co/read/294589/bekas-bupati-rembang-dihukum-tiga-tahun-penjara/full&view=ok
SAMPANG	Letkol. Pol H. FADHILAH BUDIONO	5		Newspaper via Google Search	https://nasional.tempo.co/read/38143/bupati-sampang-divonis-bebas
SIDOARJO	Drs. WIN HENDRARSO, M.Si	4	6	ICW 2007, Newspaper via Google Search	https://news.detik.com/berita-jawa-timur/d-2390131/kesandung-dugaan-korupsi-mantan-bupati-sidoarjo-2-periode-dieksekusi- AND https://nasional.kompas.com/read/2011/09/15/02494741/win.hendrarso.dituntut.6.tahun
SIKKA	Drs. ALEXANDER LONGGINUS	3		Newspaper via Google Search	https://kupang.tribunnews.com/2011/02/01/alex-longginus-dituntut-mundur
SIMALUNGUN	Ir. JOHN HUGO SILALAHI	4	4	KPK, Newspaper via Google Search	https://topmetro.news/65013/john-hugo-silalahi-dan-2-eks-anggota-dprd-sumut-divonis-4-tahun-penjara/
SITUBONDO	Drs. MOHDIAAMAN	3		Newspaper via Google Search	https://issuu.com/ramadakusuma/docs/10_desember/8 AND https://ora.ox.ac.uk/objects/uuid:ddb1684e-217d-453e-9c1c-820552ad3089/download_file?file_format=pdf&safe_filename=THESIS01&type_of_work=Thesis
SLEMAN	Drs. IBNU SUBIANTO, Akt	4	4	Newspaper via Google Search	https://regional.kompas.com/read/2010/01/13/17574328/bupati.sleman.ibnu.subiyanto.divonis.empat.tahun.penjara.
SOPPENG	Drs. HATTA SANJAYA	3		Newspaper via Google Search	https://wa-iki.blogspot.com/2015/03/kasus-rpu-soppeng-disidangkan.html	Note: this is not a news source, but they indicate a source, Ujungpadang Expres, which is a news source
SRAGEN	H. UNTUNG SARONO W. SUKARNO	4	7	Newspaper via Google Search	https://www.solopos.com/korupsi-kasda-sragen-dua-eks-bupati-bakal-bertemu-di-pengadilan-1012410 AND https://www.tribunnews.com/regional/2011/07/12/mantan-bupati-sragen-ditahan
SUKABUMI	Drs. H. MAMAN SULAEMAN	4	4	ICW 2008, Newspaper via Google Search	https://nasional.kompas.com/read/2008/11/25/11131381/dana.rp.45.miliar.itu.akhirnya.menguap
SUMBA BARAT	THIMOTHIUS LANGGAR, SH	0
SUMBA TIMUR	Ir. UMBU MEHANG KUNDA	0
SUMENEP	KH. MOCH. RAMDAN SIRAJ, BA	0
TABANAN	I NYOMAN ADI WIRYATAMA, BA	0
TAKALAR	Drs. H. IBRAHIM REWA, MM	0
TANAH DATAR	H. MASRIADI MARTUNUS DATUK RAJA PENGHULU	4	1	Blog, and Archive of all Indonesian court decisions	https://putusan3.mahkamahagung.go.id/direktori/putusan/eb30bec124e2788f1a9accfb270105a8.html AND https://eriandi.wordpress.com/2007/11/26/mantan-bupati-dan-asisten-sekda-jadi-terdakwa/
TANAH LAUT	Drs. H. ARDIANSYAH	4	3	ICW 2007, Newspaper via Google Search	https://www.tribunnews.com/nasional/2015/11/24/mantan-bupati-tanah-laut-adriansyah-ikhlas-dipenjara-tiga-tahun
TANGERANG	Drs. H. ISMET ISKANDAR	3		Newspaper via Google Search	http://tangerangnews.com/kabupaten-tangerang/read/8356/KAMPAK-Minta-Penuntasan-Kasus-Bupati-Ismet-Iskandar
TANGGAMUS	Drs. FAUZAN SYAI'E, M.Sc	0
TAPANULI TENGAH	Drs. TUANI LUMBAN TOBING	2		Newspaper via Google Search	https://waspada.co.id/2016/03/dugaan-korupsi-patung-anugerah-poldasu-sandera-tuani-l-tobing/
TAPIN	Drs. H. IDIS NURDIN HALIDI	0
TIMOR TENGAH UTARA	Drs. HENDRIKUS SAKUNAD	0
TRENGGALEK	Ir. MULYADI W. R	0
TUBAN	Dra. Hj. HAINY RELAWATI RINI WIDYASTUTI	0
TULANGBAWANG	Drs. ABDURACHMAN SARBINI, SH	2		ICW 2007, Newspaper via Google Search	https://news.detik.com/berita/d-252783/dua-bupati-lampung-diduga-korupsi
TULUNGAGUNG	Ir. HERU TJAHJONO, MM.	0
WONOGIRI	BEGUS POERNOMOSIDI	1		ICW 2007
WONOSOBO	Drs. TRIMAWAN NUGROHADI	4	5	Newspaper via Google Search	https://regional.kompas.com/read/2012/01/10/20595199/Mantan.Bupati.Wonosobo.Divonis.5.Tahun.Penjara
