# Supplementary material for: Democratization, leader education and growth: firm-level evidence from Indonesia
Source: Springer Nature journal article supplement (doi:10.1007/s10887-022-09221-5), 2023-02-15
Supplement: MOESM2 [file Penuntutan 2011.pdf › Data/Mayor-level corruption dataset (incl sources)/KPK Penuntutan 2011-/Penuntutan 2011.pdf]

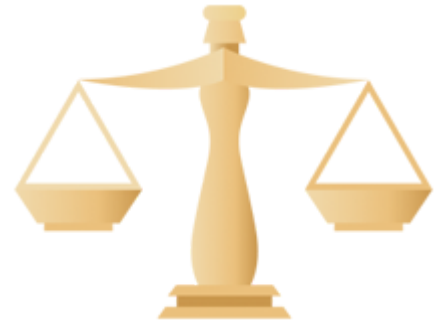

# PENINDAKAN

Menyajikan informasi perkembangan penanganan tindak pidana korupsi yang dilakukan oleh Komisi Pemberantasan Korupsi.

[Beranda \(/id/\)](#) / [Berkas](#) / [PENINDAKAN](#) / [Penuntutan \(/id/berkas/penindakan/penuntutan\)](#) / [Penuntutan 2011](#)

## PENUNTUTAN

### Penuntutan 2011

Ditulis oleh admin.acch. Diposting di [Penuntutan \(/id/berkas/penindakan/penuntutan\)](#). Dilihat: 4807

#### Desember

1. -

---

#### November

1. Perkara TPK atas nama terdakwa MUHAMMAD NAZARUDIN penerimaan hadiah atau janji padahal diketahui atau patut diduga bahwa hadiah tersebut diberikan sebagai akibat atau disebabkan karena telah melakukan atau tidak melakukan sesuatu dalam jabatannya yang bertentangan dengan kewajibannya sehubungan dengan pembangunan Wisma Atlit di Jaka Baring Sumatera Selatan tahun 2010 – 2011.
2. Perkara TPK atas nama terdakwa HERMAN FELANI sebagai orang yang bersama-sama atau turut serta terkait dengan perbuatan Journal Effendi Siahaan (Mantan Kepala Biro Hukum Setda

Prop DKI Jakarta) dkk melakukan TPK dalam pengelolaan APBD pada Biro Hukum Sekretariat Daerah Prop. DKI Jakarta TA 2006 – 2007.

3. Perkara TPK nama terdakwa MURMAN EFFENDI memberi atau menjanjikan sesuatu kepada pegawai negeri atau penyelenggara negara dengan maksud supaya pegawai negeri atau penyelenggara negara tersebut berbuat atau tidak berbuat sesuatu dalam jabatannya yang bertentangan dengan kewajibannya.
4. Perkara TPK nama terdakwa SYUHADA TASMAN turut serta terkait perbuatan Tengku Azmun Jaafar (Bupati Pelalawan) Dkk, melakukan TPK terkait dengan penilaian dan pengesahan RKT UPHHKHT pada areal yng diberikan IUPHHKT-HT Tahun 2001 sd 2006 di wilayah Kabupaten Pelalawan kepada sejumlah perusahaan tidak sesuai dengan ketentuan yang berlaku dan dan mengakibatkan kerugian keuangan negara atau perekonomian negara.

---

## Oktober

1. -

---

## September

1. Perkara TPK atas nama terdakwa TIMAS GINTING sehubungan dengan pengadaan Pembangkit Listrik Tenaga Surya dan Pekerjaan Supervisi Pembangkit Listrik Tenaga Surya (PLTS) di Ditjen Pembinaan Pengembangan Masyarakat dan Kawasan Transmigrasi (P2MKT) Kementerian Tenaga Kerja dan Transmigrasi TA 2008.
  2. Perkara TPK atas nama terdakwa ODIH JUANDA sehubungan dengan memberikan sesuatu atau uang kepada Hakim pada Pengadilan Hubungan Industrial Pengadilan Negeri Bandung terkait putusan perkara dan untuk pengurusan kasus di Mahkamah Agung RI supaya putusan kasasi menolak gugatan Serikat Pekerja dalam penanganan kasus Hubungan Industrial terkait pemutusan hubungan kerja akibat mogok kerja tidak sah yang dilakukan oleh Pekerja PT Onamba Indonesia.
  3. Perkara TPK atas nama terdakwa IMAS DIANSARI sehubungan dengan menerima pemberian sesuatu atau uang dengan maksud untuk mempengaruhi putusan perkara yang diserahkan kepada untuk diadili dan atau pegawai negeri atau penyelenggaran negara yang menerima hadiah atau janji.
  4. Perkara TPK atas nama terdakwa YUSRIZAL sehubungan dengan orang yang bersama-sama atau turut serta terkait perbuatan Bachtiar Chamsyah dalam melakukan tindak pidana korupsi pengadaan sapi impor dan mesin jahit di Departemen Sosial RI tahun 2004.
  5. Perkara TPK atas nama terdakwa SYARIFUDDIN sehubungan dengan menerima sesuatu atau uang dalam penanganan perkara penjualan aset PT. Skycamping Indonesia (dalam pailit).
-

## Agustus

1. Perkara TPK atas nama terdakwa HARI SABARNO sehubungan dengan pengadaan mobil pemadam kebakaran dengan menggunakan pompa merk Tohatsu type V80ASM dan Merk Morita di beberapa Pemprov/Pemkab/Pemkot dengan pembayaran bersumber dari APBD tahun 2002 sd 2005.
  2. Perkara TPK atas nama terdakwa WAFID MUHARAM sehubungan dengan pegawai negeri atau penyelenggara negara yang menerima hadiah atau janji tersebut yang diberikan untuk menggerakkan agar melakukan atau tidak melakukan sesuatu dalam jabatannya yang bertentangan dengan kewajibannya yang berhubungan dengan pembangunan wisma atlet di Jaka Baring Sumatera Selatan.
  3. Perkara TPK atas nama terdakwa AMRUN DAULAY sehubungan dengan orang yang bersama-sama atau turut serta terkait perbuatan Bachtiar Chamsyah dalam melakukan tindak pidana korupsi pengadaan sapi impor dan mesin jahit di Departemen Sosial RI tahun 2004.
- 

## Juli

1. Perkara TPK atas nama terdakwa ARWIN AS sehubungan dengan penerbitan ijin usaha pemanfaatan hasil hutan kayu pada hutan tanaman tahun 2001 - 2003 di wilayah kabupaten Siak kepada sejumlah perusahaan yang tidak sesuai dengan ketentuan yang berlaku dan mengakibatkan kerugian keuangan negara atau perekonomian negara dan atau menerima hadiah berkaitan dengan kekayaan atau kewenangan yang berhubungan dengan jabatannya.
  2. Perkara TPK atas nama terdakwa EDDIE WIDIONO SUWONDHO sehubungan dengan pengadaan Roll Out Customer Information System – Rencana Induk Sistem Informasi (CIS – RISI) pada PT PLN (Persero) Distribusi Jakarta Raya dan Tangerang.
  3. Perkara TPK atas nama terdakwa SOEMINO EKO SAPUTRO sehubungan dengan pengadaan Jasa Angkutan KRL Hibah Ex. Jepang Tahun 2006 – 2007 yang atas nama tersangka.
  4. Perkara TPK atas nama terdakwa PUGUH WIRAWAN sehubungan dengan memberikan sesuatu atau uang kepada Hakim Pengawas Pengadilan Niaga pada Pengadilan Negeri Jakarta Pusat terkait penjualan aset PT. Skycamping Indonesia.
- 

## Juni

1. Perkara TPK atas nama terdakwa HARIADI SADONO sehubungan dengan pengadaan outsourcing pengelolaan sistem informasi (CIS) berbasis IT mencakup Sistem Informasi Pengelolaan Piutang Pelanggan (SIP3) pada PT PLN (Persero) Wilayah Lampung pada Desember 2003 sd Maret 2004.

2. Perkara TPK atas nama terdakwa MOH. EL IDRIS sehubungan dengan memberikan sesuatu kepada pegawai negeri atau penyelenggara negara tersebut untuk berbuat atau tidak berbuat sesuatu dalam jabatannya yang bertentangan dengan kewajibannya.
  3. Perkara TPK atas nama terdakwa MINDO ROSALINA MANULLANG sehubungan dengan memberikan sesuatu kepada pegawai negeri atau penyelenggara negara tersebut untuk berbuat atau tidak berbuat sesuatu dalam jabatannya yang bertentangan dengan kewajibannya.
- 

## Mei

1. Perkara TPK atas nama terdakwa BINAHATI B. BAEHA sehubungan dengan pengelolaan dana penanggulangan bencana alam Nias Tahun 2007.
  2. Perkara TPK atas nama terdakwa SOETEDJO YUWONO sehubungan dengan pengadaan peralatan kesehatan untuk rumah sakit rujukan penanganan Flu Burung dari DIPA APBN-P Kementerian Koordinator Bidang Kesejahteraan Rakyat TA 2006.
  3. Perkara TPK atas nama terdakwa DWI SENO WIJARNAKO sehubungan dengan pegawai negeri atau penyelenggara negara (penegak hukum) yang dengan maksud menguntungkan diri sendiri atau orang lain secara melawan hukum atau dengan menyalahgunakan kekuasaan memaksa seseorang memberikan sesuatu.
- 

## April

1. Perkara TPK atas nama terdakwa MOCHTAR MOHAMMAD sehubungan dengan pengelolaan dan pertanggungjawaban keuangan APBD Pemerintah Kota Bekasi dan atau perbuatan melakukan percobaan perbantuan, atau permufakatan jahat untuk memberi atau menjanjikan sesuatu terkait dengan Adipura dan pengesahan APBD 2010 Pemerintah Kota Bekasi.
  2. Perkara TPK atas nama terdakwa GEORGIE KUMAAT sehubungan dengan orang yang turut serta atau bersama-sama dengan Hariadi Sadono (GM PT PLN Persero Wilayah Lampung Periode Maret 2004-2008) dalam pengadaan outsourcing pengelolaan sistem informasi CIS Berbasis IT mencakup Sistem Informasi Pengelolaan Piutang Pelanggan (SIP3) pada PT PLN wilayah Lampung tahun 2003-2008 dan perbuatannya memberikan hadiah atau janji kepada pegawai PT PLN (Persero).
- 

## Maret

1. Perkara TPK atas nama terdakwa SYAMSUL ARIFIN sehubungan dengan penyalahgunaan dan pengelolaan kas daerah kabupaten Langkat serta penyalahgunaan penggunaan APBD kabupaten Langkat pada tahun 2000-2007.

2. Perkara TPK atas nama terdakwa AGUS CONDRIO PRAYITNO, MAX MOEIN, RUSMAN LUMBANTORUAN, POLTAK SITORUS dan WILLIEM M TUTUARIMA sehubungan dengan penerimaan sejumlah TC BII oleh anggota DPR RI Komisi IX periode 1999 sd 2004 dalam rangka pemilihan Deputy Gubernur Senior (DGS) Bank Indonesia pada tahun 2004 yang dilakukan bersama-sama Dudhie Makmun Murod.
3. Perkara TPK atas nama terdakwa MUSFAR AZIZ sehubungan dengan orang yang bersama-sama atau turut serta dalam perkara TPK pada pengadaan mesin jahit pada bagian proyek pengentasan fakir miskin Depsos Tahun 2004 dan 2006 yang dilakukan oleh tersangka Bachtiar Chamsyah.
4. Perkara TPK atas nama terdakwa MUHAMMAD NURLIF, ASEP RUCHIMAT SUDJANA, REZA KAMARULLAH, BAHARUDDIN ARITONANG dan HENGKY BARAMULI sehubungan dengan penerimaan sejumlah TC BII oleh anggota DPR RI Komisi IX periode 1999 sd 2004 dalam rangka pemilihan Deputy Gubernur Senior (DGS) Bank Indonesia pada tahun 2004 yang dilakukan bersama-sama Hamka Yandhu.
5. Perkara TPK atas nama terdakwa AHMAD HAFIZ ZAWAWI, MARTIN BRISA SERAN, PASKAH SUZETTA, BOBBY SH SUHARDIMAN, ANTHONY ZEIDRA ABIDIN sehubungan dengan penerimaan sejumlah TC BII oleh anggota DPR RI Komisi IX periode 1999 sd 2004 dalam rangka pemilihan Deputy Gubernur Senior (DGS) Bank Indonesia pada tahun 2004 yang dilakukan bersama-sama Hamka Yandhu.
6. Perkara TPK atas nama terdakwa NI LUH MARIANI, SUTANTO PRANOTO SOEWARNOW dan MATHEOS PORMES sehubungan dengan penerimaan sejumlah TC BII oleh anggota DPR RI Komisi IX periode 1999 sd 2004 dalam rangka pemilihan Deputy Gubernur Senior (DGS) Bank Indonesia pada tahun 2004 yang dilakukan bersama-sama Dudhie Makmun Murod.
7. Perkara TPK atas nama terdakwa PANDA NABABAN, ENGELINA PATIASINA, M IQBAL, BUDININGSIH dan JEFFRI TONGAS sehubungan dengan penerimaan sejumlah TC BII oleh anggota DPR RI Komisi IX periode 1999 sd 2004 dalam rangka pemilihan Deputy Gubernur Senior (DGS) Bank Indonesia pada tahun 2004 yang dilakukan bersama-sama Dudhie Makmun Murod.
8. Perkara TPK atas nama terdakwa DANIEL TANJUNG dan SOFYAN USMAN sehubungan dengan penerimaan sejumlah TC BII oleh anggota DPR RI Komisi IX periode 1999 sd 2004 dalam rangka pemilihan Deputy Gubernur Senior (DGS) Bank Indonesia pada tahun 2004 yang dilakukan bersama-sama Endin J Soefihara.

---

## Februari

1. Perkara TPK atas nama terdakwa ARI MULADI sebagai orang yang bersama-sama atau turut serta atau turut membantu terkait perbuatan Anggodo Widjojo dkk dalam melakukan perbuatan permufakatan jahat untuk melakukan, menyuruh melakukan, turut serta melakukan perbuatan

dengan sengaja mencegah merintangi atau menggagalkan secara langsung atau tidak langsung penyidikan, penuntutan, dan pemeriksaan disidang pengadilan terhadap tersangka atau terdakwa ataupun para saksi dalam perkara korupsi yang terjadi pada tahun 2008 sampai dengan tahun 2009, dan atau perbuatan bersama-sama atau turut serta, membantu melakukan percobaan memberi atau menjanjikan sesuatu kepada pimpinan KPK dan atau pegawai KPK.

---

## Januari

1. Perkara TPK atas nama terdakwa BUDI HARSONO sehubungan dengan orang yang secara melawan hukum melakukan perbuatan memperkaya diri sendiri atau orang lain atau suatu korporasi karena jabatan atau kedudukannya wilayah Lampung Periode 2004 – 2008.
2. Perkara TPK atas nama terdakwa PUTRONEFO A PRAYUGO sehubungan dengan pengadaan Sistem Komunikasi Radio Terpadu untuk Bagian Anggaran 69 pada Sekretariat Jenderal Departemen Kehutanan RI tahun 2006 dan 2007.
3. Perkara TPK atas nama terdakwa SJAFII AHMAD sehubungan dengan orang yang turut serta atau bersama-sama terkait perbuatan Budiarto Maliang dan Edi Suranto dkk dalam pelaksanaan pengadaan alat Rontgen Portable untuk pelayanan Puskesmas di daerah tertinggal, terpencil, perbatasan dan pulau-pulau kecil di Biro Perencanaan dan Anggaran Sekjen Depkes RI tahun 2007 dan perbuatannya menerima hadiah.
4. Perkara TPK atas nama terdakwa WANDJOJO SISWANTO sehubungan dengan pengadaan Sistem Komunikasi Radio Terpadu (SKRT) untuk Bagian Anggaran 69 pada Sekretariat Jenderal Departemen Kehutanan RI pada tahun 2006 dan 2007.
5. Perkara TPK atas nama terdakwa DHARNA DACHLAN sehubungan dengan proyek pembangunan jalan Palembang – Tanjung Api-api Sumatera Selatan TA 2005-2008.
6. Perkara TPK atas nama terdakwa CEP RUHYAT sehubungan dengan orang yang bersama-sama atau turut serta dalam perkara TPK pada pengadaan sarung yang dananya berasal dari pengelolaan rekening pemerintah pada Depsos Tahun 2006-2008 yang dilakukan oleh tersangka Bachtiar Chamsyah.

---

**Share :**

Bagikan 0

Tweet

## PENINDAKAN

Penyidikan (/id/berkas/penindakan/penyidikan)

Penuntutan (/id/berkas/penindakan/penuntutan)

Inkracht (/id/berkas/penindakan/inkracht)

insiden (/id/berkas/peristiwa/insiden/

Jejak Kasus (/id/jejak-kasus)









## LINK

[TENTANG ACCH \(/ID/TENTANG-ACCH\).](#)

[DISCLAIMER \(/ID/DISCLAIMER\).](#)

[KETENTUAN \(/ID/KETENTUAN\).](#)

[SITEMAP \(/ID/SITEMAP\).](#)

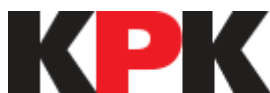

**Komisi Pemberantasan Korupsi**

[\(HTTPS://WWW.KPK.GO.ID/\)](https://www.kpk.go.id/)

## REDAKSI ACCH

KOMISI PEMBERANTASAN KORUPSI  
JL. KUNINGAN PERSADA KAV. 4 JAKARTA 12950  
TELP: (021) 2557 8300 EXT. 8642  
EMAIL: [ACCH@KPK.GO.ID](mailto:ACCH@KPK.GO.ID)  
([MAILTO:ACCH@KPK.GO.ID](mailto:ACCH@KPK.GO.ID)).
