# Supplementary material for: Democratization, leader education and growth: firm-level evidence from Indonesia
Source: Springer Nature journal article supplement (doi:10.1007/s10887-022-09221-5), 2023-02-15
Supplement: MOESM2 [file Penuntutan 2012.pdf › Data/Mayor-level corruption dataset (incl sources)/KPK Penuntutan 2011-/Penuntutan 2012.pdf]

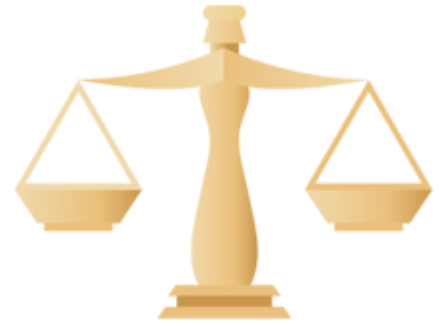

# PENINDAKAN

Menyajikan informasi perkembangan penanganan tindak pidana korupsi yang dilakukan oleh Komisi Pemberantasan Korupsi.

[Beranda \(/id/\)](#) / [Berkas](#) / [PENINDAKAN](#) / [Penuntutan \(/id/berkas/penindakan/penuntutan\)](#) / [Penuntutan 2012](#)

## PENUNTUTAN

### Penuntutan 2012

Ditulis oleh admin.acch. Diposting di [Penuntutan \(/id/berkas/penindakan/penuntutan\)](#). Dilihat: 4871

#### Desember

1. Perkara TPK atas nama terdakwa SITI HARTATI MURDAYA sehubungan dengan memberi atau menjanjikan sesuatu kepada Pegawai Negeri atau Penyelenggara Negara terkait dengan proses pengurusan HGU Perkebunan an. PT Cipta Cakra Murdaya dan atau PT Hardaya Inti Plantations yang terletak di Kec. Bukal Kab. Buol.
2. Perkara TPK atas nama terdakwa HERU KISBANDONO sehubungan dengan memberi atau menjanjikan terkait dengan penanganan perkara Tindak Pidana Korupsi penyimpangan anggaran pemeliharaan mobil dinas sekretariat DPRD Kab. Grobogan TA 2006 – 2008 atas nama terdakwa Muhammad Yaeni di Pengadilan Tipikor pada Pengadilan Negeri Semarang.
3. Perkara TPK atas nama terdakwa KARTINI JULIANA M MARPAUNG sehubungan dengan menerima pemberian atau janji terkait dengan penanganan perkara Tindak Pidana Korupsi mengenai penyimpangan anggaran pemeliharaan mobil dinas sekretariat DPRD Kab. Grobogan TA 2006 – 2008 atas nama terdakwa Muhammad Yaeni di Pengadilan Tindak Pidana Korupsi pada Pengadilan Negeri Semarang.

4. Perkara atas nama terdakwa SRI DARTUTIK TPK sehubungan dengan memberi atau menjanjikan sesuatu kepada Pegawai Negeri atau Penyelenggara Negara terkait dengan penyimpangan anggaran pemeliharaan mobil Dinas Sekretariat DPRD Kab. Grobogan TA 2006 – 2008.
- 

## **November**

1. -
- 

## **Oktober**

1. Perkara TPK atas nama terdakwa TOMMY HINDRATNO sehubungan dengan menerima hadiah atau janji terkait dengan pengurusan pajak lebih bayar/restitusi pajak atau permufakatan jahat melakukan tindak pidana korupsi menerima atau memberi hadiah atau janji.
2. Perkara TPK atas nama terdakwa MOHAMAD HASAN BIN KHUSI MOHAMAD sehubungan dengan melakukan perbuatan melakukan, menyuruh melakukan, turut serta melakukan perbuatan dengan sengaja mencegah, merintangi atau menggagalkan secara langsung atau tidak langsung penyidikan, penuntutan, dan pemeriksaan di sidang pengadilan terhadap tersangka atau terdakwa ataupun para saksi dalam perkara korupsi pengadaan dan pemasangan Pembangkit Listrik Tenaga Surya (PLTS) di Ditjen Pembinaan Pengembangan Masyarakat dan Kawasan Transmigrasi (P2MKT) Kementerian Tenaga Kerja dan Transmigrasi TA 2008.
3. Perkara TPK atas nama terdakwa R. AZMI BIN MOHAMAD YUSOF sehubungan dengan melakukan perbuatan melakukan, menyuruh melakukan, turut serta melakukan perbuatan dengan sengaja mencegah, merintangi atau menggagalkan secara langsung atau tidak langsung penyidikan, penuntutan, dan pemeriksaan di sidang pengadilan terhadap tersangka atau terdakwa ataupun para saksi dalam perkara korupsi pengadaan dan pemasangan Pembangkit Listrik Tenaga Surya (PLTS) di Ditjen Pembinaan Pengembangan Masyarakat dan Kawasan Transmigrasi (P2MKT) Kementerian Tenaga Kerja dan Transmigrasi TA 2008.
4. Perkara TPK atas nama terdakwa NENENG SRI WAHYUNI sehubungan dengan pengadaan dan pemasangan Pembangkit Listrik Tenaga Surya (PLTS) di Dirjen Pembinaan Pengembangan Masyarakat dan Kawasan Transmigrasi (P2MKT) Kementrian Tenaga Kerja dan Transmigrasi Tahun Anggaran 2008.
5. Perkara TPK atas nama terdakwa LUKMAN ABBAS sehubungan dengan menerima hadiah atau janji terkait dengan usulan penambahan anggaran untuk kegiatan Pembangunan Sarana dan Prasarana dalam rangka pelaksanaan PON XVIII di Prop Riau.
6. Perkara TPK atas nama terdakwa TAUFAN ANDOSO YAKIN sehubungan dengan menerima hadiah atau janji terkait dengan persetujuan DPRD Prop Riau dalam usulan Perubahan

## September

1. Perkara TPK atas nama terdakwa JACOB PURWONO dan KOSASIH sehubungan dengan pengadaan dan pemasangan Pembangkit Listrik Tenaga Surya (PLTS) berupa Solar Home System (SHS) dan Pembangkit Listrik Tenaga Mikro Hidro (PLTMH) pada Direktorat Jenderal Listrik dan Pemanfaatan Energi Departemen Energi dan Sumber Daya Mineral (LPE ESDM) TA 2009.
  2. Perkara TPK atas nama terdakwa MAHYUDIN HARAHAHAP sehubungan dengan penjualan aset tanah PT Barata Indonesia Persero tahun 2004.
  3. Perkara TPK atas nama terdakwa TB AAT SYAFAAT sehubungan dengan pembangunan Dermaga Trestle Kubangsari pada Pemerintah Kota Cilegon TA 2010.
  4. Perkara TPK atas nama terdakwa AMRAN BATALIPU sehubungan dengan menerima sesuatu atau janji terkait dengan proses pengurusan Hak Guna Usaha (HGU) Perkebunan yang terletak di Kecamatan Bukal Kab. Buol Sulawesi Tengah.
- 

## Agustus

1. Perkara TPK atas nama terdakwa JAMES GUNARJO BUDIHARJO sehubungan dengan memberi hadiah atau janji kepada pegawai negeri atau penyelenggara negara terkait dengan pengurusan pajak lebih bayar/restitusi pajak dari PT Bhakti Investama atau dari perusahaan-perusahaan lainnya atau permufakatan jahat melakukan tindak pidana korupsi menerima atau memberi hadiah atau janji.
2. Perkara TPK atas nama terdakwa ANGELINA PATRICIA PINGKAN SONDAKH sehubungan dengan penerimaan hadiah atau janji padahal diketahui atau patut diduga bahwa hadiah atau janji tersebut diberikan sebagai akibat atau disebabkan karena telah melakukan atau tidak melakukan sesuatu dalam jabatannya yang bertentangan dengan kewajibannya terkait dengan pengurusan anggaran pada Kementerian Pemuda dan Olahraga dan Kementerian Pendidikan Nasional antara tahun 2010 – 2011 atau penerimaan janji yang berhubungan dengan jabatannya.
3. Perkara TPK atas nama terdakwa GONDO SUJONO sehubungan dengan memberi atau menjanjikan sesuatu kepada pegawai negeri atau penyelenggara negara terkait dengan proses pengurusan Hak Guna Usaha (HGU) Perkebunan atas nama PT Cipta Cakra Murdaya dan atau PT Hardaya Inti Plantation yang terletak di Kecamatan Bukal Kab. Buol Sulawesi Tengah.
4. Perkara TPK atas nama terdakwa YANI ANSORI sehubungan dengan memberi atau menjanjikan sesuatu kepada pegawai negeri atau penyelenggara negara terkait dengan proses

pengurusan Hak Guna Usaha (HGU) Perkebunan atas nama PT Cipta Cakra Murdaya dan atau PT Hardaya Inti Plantation yang terletak di Kecamatan Bukal Kab. Buol Sulawesi Tengah.

---

## **Juli**

1. Perkara TPK atas nama terdakwa SHIOKAWA TOSHIO sehubungan dengan memberikan sesuatu atau uang kepada Hakim pada Pengadilan Hubungan Industrial Pengadilan Negeri Bandung terkait putusan perkara dan untuk pengurusan kasus di Mahkamah Agung RI terkait kasus PT Onamba Indonesia.
  2. Perkara TPK atas nama terdakwa MURDOKO sehubungan dengan secara bersama-sama atau turut serta dalam melakukan perbuatan melawan hukum memperkaya diri sendiri atau orang lain dan penyalahgunaan wewenang dalam penggunaan dana dari rekening giro pemerintah Kab. Kendal Tahun 2003 dan 2004 yang bersumber dari Dana Alokasi Umum dan Dana Eks Pinjaman BPD Jateng Cab Kendal.
  3. Perkara TPK atas nama terdakwa RUSTAM SYARIFUDDIN PAKAYA sehubungan dengan pengadaan alat kesehatan I untuk kebutuhan Pusat Penanggulangan Krisis Departemen Kesehatan dari dan DIPA revisi APBN Pusat Penanggulangan Krisis Sekretariat Jenderal Departemen Kesehatan tahun anggaran 2007.
  4. Perkara TPK atas nama terdakwa M FAISAL ASWAN dan M DUNIR sehubungan dengan menerima hadiah atau janji terkait dengan Perubahan Peraturan Daerah Nomor 6 Tahun 2010 tentang Pengikatan Dana Anggaran kegiatan Tahun Jamak untuk pembangunan venues pada kegiatan PON XVIII Prop Riau.
- 

## **Juni**

1. Perkara TPK atas nama terdakwa EKA DHARMA PUTRA memberi hadiah atau janji kepada Pegawai Negeri atau Penyelenggara Negara terkait dengan Perubahan Peraturan Daerah Nomor 6 Tahun 2010 tentang Pengikatan Dana Anggaran kegiatan Tahun Jamak untuk pembangunan venues pada kegiatan PON XVIII Prop Riau.
2. Perkara TPK atas nama terdakwa RAHMAT SYAHPUTRA memberi hadiah atau janji kepada Pegawai Negeri atau Penyelenggara Negara terkait dengan Perubahan Peraturan Daerah Nomor 6 Tahun 2010 tentang Pengikatan Dana Anggaran kegiatan Tahun Jamak untuk pembangunan venues pada kegiatan PON XVIII Prop Riau.
3. Perkara TPK atas nama terdakwa ERWIN PAMAN dan ALI AMRA turut serta dan/atau bersama-sama dengan terdakwa Murman Efendi dkk memberi atau menjanjikan sesuatu kepada pegawai negeri atau penyelenggara negara dengan maksud supaya pegawai negeri atau penyelenggara negara tersebut berbuat atau tidak berbuat sesuatu dalam jabatannya yang bertentangan dengan kewajibannya.

4. Perkara TPK atas nama terdakwa MIRANDA SWARAY GOELTOM sebagai orang yang bersama-sama atau turut serta atau menganjurkan terkait dengan perbuatan Nunun Nurbaetie untuk melakukan TPK memberikan Travellers Cheque (TC) kepada Anggota DPR RI Periode 1999 - 2004 dalam Pemilihan Deputy Gubernur Senior Bank Indonesia Tahun 2004.
- 

## Mei

1. Perkara TPK atas nama terdakwa SOEMARMO HADI SAPUTRO sehubungan dengan pemberian sesuatu kepada Pegawai Negeri atau Penyelenggara Negara bersama-sama dengan Akhmat Zaenuri (Sekda Kota Semarang).
  2. Perkara TPPU atas nama terdakwa WA ODE NURHAYATI sehubungan dengan perbuatan menempatkan, mentransfer, mengubah bentuk, dan atau menyembunyikan/menyamarkan asal-usul , sumber, lokasi, kepemilikan dan atau perbuatan menerima atau menguasai penempatan, pentransferan, pembayaran atau menggunakan harta kekayaan yang diketahui atau patut diduga merupakan hasil tindak pidana atas nama tersangka(Anggota DPR RI).
  3. Perkara TPK atas nama terdakwa BURHANUDDIN HUSIN sehubungan dengan turut serta terkait perbuatan Tengku Azmun Jaafar (Bupati Pelalawan) Dkk, melakukan TPK terkait dengan penilaian dan pengesahan RKT UPHHKHT pada areal yang diberikan IUPHHKT-HT Tahun 2001 sd 2006 di wilayah Kabupaten Pelalawan kepada sejumlah perusahaan tidak sesuai dengan ketentuan yang berlaku dan dan mengakibatkan kerugian keuangan negara atau perekonomian negara.
- 

## April

1. Perkara TPK atas nama terdakwa DJOKO SUSILO sehubungan dengan pengadaan Driving Simulator Roda Dua (R2) dan Roda Empat (R4) pada Korps Lalu Lintas Mabes Polri TA 2011.
- 

## Maret

1. Perkara TPK atas nama terdakwa AGUNG PURNO SARJONO sehubungan dengan menerima hadiah atau janji sebagai Pegawai Negeri atau Penyelenggara Negara dengan maksud supaya Pegawai Negeri atau Penyelenggara Negara tersebut berbuat atau tidak berbuat sesuatu dalam jabatannya yang bertentangan dengan kewajibannya.
  2. Perkara TPK atas nama terdakwa SUMARTONO sehubungan dengan menerima hadiah atau janji sebagai Pegawai Negeri atau Penyelenggara Negara dengan maksud supaya Pegawai Negeri atau Penyelenggara Negara tersebut berbuat atau tidak berbuat sesuatu dalam jabatannya yang bertentangan dengan kewajibannya.
-

## Februari

1. Perkara TPK atas nama terdakwa NUNUN NURBAETIE sehubungan dengan pemberian travelers cheque (TC) kepada para anggota DPR-RI periode 1999-2004 dalam pemilihan Deputi Gubernur Senior Bank Indonesia tahun 2004.

## Januari

1. Perkara TPK penerimaan hadiah atau pemberian berupa uang kepada pemeriksa Badan Pemeriksa Keuangan Sulawesi Utara pada tahun 2008 atas Laporan Keuangan Pemerintah Kota Tomohon TA. 2007 dalam kaitan tindak pidana korupsi APBD Kota Tomohon TA 2006 sd 2008 dengan tersangka Jefferson Soleiman Montesqieu Rumajar (Walikota Tomohon) atas nama tersangka BAHAR (Pimpinan Tim Pemeriksa BPK Sulut) dan MUH. MUNZIR (Anggota Tim Pemeriksa BPK Sulut).
2. Perkara TPK sehubungan dengan pemberian sesuatu kepada Pegawai Negeri atau Penyelenggara Negara atas nama tersangka AKHMAT ZAENURI,MM (Sekda Kota Semarang).
3. Perkara TPK memberi sesuatu/hadiah berupa uang kepada jaksa penuntut umum di Kantor Kejaksaan Negeri Cibinong Jawa Barat terkait dengan perubahan pembuatan rencana tuntutan perkara penipuan atas nama tersangka EDWARD M BUNJAMIN (Direktur Utama PT. Damarindo Abadi Lestari) bersama-sama dengan tersangka ANTON BAMBANG H (Swasta).
4. Perkara TPK penerimaan sesuatu atau hadiah berupa uang dari EDWARD M BUNJAMIN dalam kaitan perubahan rencana penuntutan kasus pemalsuan dan penggelapan di Pengadilan Negeri Cibinong Jawa barat atas nama tersangka SISTOYO dkk (Jaksa Penuntut Umum Kejaksaan Negeri Cibinong Jawa Barat).

**Share :**

Bagikan 0

Tweet

## PENINDAKAN

Penyidikan (/id/berkas/penindakan/penyidikan)

Penuntutan (/id/berkas/penindakan/penuntutan)

Inkracht (/id/berkas/penindakan/inkracht)

Jejak Kasus (/id/jejak-kasus)











## LINK

[TENTANG ACCH \(/ID/TENTANG-ACCH\).](#)

[DISCLAIMER \(/ID/DISCLAIMER\).](#)

[KETENTUAN \(/ID/KETENTUAN\).](#)

[SITEMAP \(/ID/SITEMAP\).](#)

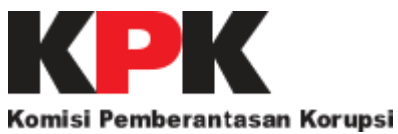

[\(HTTPS://WWW.KPK.GO.ID/\)](https://www.kpk.go.id/)

## REDAKSI ACCH

KOMISI PEMBERANTASAN KORUPSI  
JL. KUNINGAN PERSADA KAV. 4 JAKARTA 12950  
TELP: (021) 2557 8300 EXT. 8642  
EMAIL: [ACCH@KPK.GO.ID](mailto:ACCH@KPK.GO.ID)  
([MAILTO:ACCH@KPK.GO.ID](mailto:ACCH@KPK.GO.ID)).
