# Supplementary material for: Democratization, leader education and growth: firm-level evidence from Indonesia
Source: Springer Nature journal article supplement (doi:10.1007/s10887-022-09221-5), 2023-02-15
Supplement: MOESM2 [file Penuntutan 2013.pdf › Data/Mayor-level corruption dataset (incl sources)/KPK Penuntutan 2011-/Penuntutan 2013.pdf]

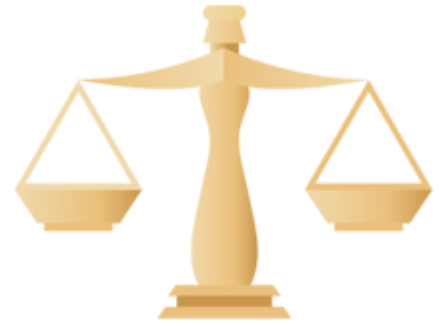

# PENINDAKAN

Menyajikan informasi perkembangan penanganan tindak pidana korupsi yang dilakukan oleh Komisi Pemberantasan Korupsi.

[Beranda \(/id/\)](#) / [Berkas](#) / [PENINDAKAN](#) / [Penuntutan \(/id/berkas/penindakan/penuntutan\)](#) / [Penuntutan 2013](#)

## PENUNTUTAN

### Penuntutan 2013

Ditulis oleh admin.acch. Diposting di [Penuntutan \(/id/berkas/penindakan/penuntutan\)](#). Dilihat: 4915

#### Desember

1. Perkara TPK atas nama terdakwa RUDI RUBIANDINI sehubungan dengan menerima hadiah atau janji terkait dengan kegiatan yang dilakukan oleh Satuan Kerja Khusus Pelaksanaan Kegiatan Usaha Hulu Minyak dan Gas Bumi (SKK Migas) pada Tahun 2012 – 2013 dan diduga melakukan tindak pidana pencucian uang (TPPU).
2. Perkara TPK atas nama terdakwa DEVIARDI sehubungan dengan menerima hadiah atau janji terkait dengan kegiatan yang dilakukan oleh Satuan Kerja Khusus Pelaksanaan Kegiatan Usaha Hulu Minyak dan Gas Bumi (SKK Migas) pada Tahun 2012 – 2013 dan diduga melakukan tindak pidana pencucian uang (TPPU).
3. Perkara TPK atas nama terdakwa DADA ROSADA sehubungan dengan memberi hadiah atau janji terkait dengan penanganan perkara tindak pidana korupsi mengenai penyimpangan dana bantuan sosial Pemerintah Kota Bandung T.A. 2009 s.d. 2010 di Pengadilan Tindak Pidana Korupsi pada Pengadilan Negeri Bandung dan Pengadilan Tinggi Jawa Barat dengan terdakwa Rochman selaku mantan Bendaharawan Pengeluaran Sekretariat Daerah Kota Bandung.

4. Perkara TPK atas nama terdakwa EDI SISWADI sehubungan dengan memberi hadiah atau janji terkait dengan penanganan perkara tindak pidana korupsi mengenai penyimpangan dana bantuan sosial Pemerintah Kota Bandung T.A. 2009 s.d. 2010 di Pengadilan Tindak Pidana Korupsi pada Pengadilan Negeri Bandung dan Pengadilan Tinggi Jawa Barat dengan terdakwa Rochman selaku mantan Bendaharawan Pengeluaran Sekretariat Daerah Kota Bandung.
  5. Perkara TPK atas nama terdakwa AHMAD JAUHARI sehubungan dengan pengadaan pekerjaan penggandaan Kitab Suci Al - Qur'an yang dananya dari APBN-P Tahun 2011 dan APBN Tahun 2012 pada Direktorat Bimas Islam Kementerian Agama RI.
  6. Perkara TPK atas nama terdakwa CHAIRUN NISA sehubungan dengan turut serta atau membantu menerima hadiah atau janji oleh Hakim berkaitan dengan penanganan perkara sengketa Pemilihan Kepala Daerah (Pilkada) Kabupaten Gunung Mas Provinsi Kalimantan Tengah Tahun 2013 di Mahkamah Konstitusi Republik Indonesia, padahal patut diketahui atau patut diduga bahwa hadiah atau janji tersebut diberikan untuk mempengaruhi putusan perkara yang diserahkan padanya untuk diadili.
  7. Perkara TPK atas nama terdakwa HAMBIT BINTIH dan CORNELIS NALAU ATUN sehubungan dengan turut serta atau membantu menerima hadiah atau janji oleh Hakim berkaitan dengan penanganan perkara sengketa Pemilihan Kepala Daerah (Pilkada) Kabupaten Gunung Mas Provinsi Kalimantan Tengah Tahun 2013 di Mahkamah Konstitusi Republik Indonesia, padahal patut diketahui atau patut diduga bahwa hadiah atau janji tersebut diberikan untuk mempengaruhi putusan perkara yang diserahkan padanya untuk diadili.
- 

## **November**

1. Perkara TPK atas nama terdakwa IZEDRIK EMIR MOEIS sehubungan dengan penerimaan hadiah atau janji terkait dengan proyek pembangunan Pembangkit Listrik Tenaga Uap Tarahan Lampung Tahun 2004.
  2. Perkara TPK atas nama terdakwa JONAI DI SYAHRI dan MUCHLIS THOHIR sehubungan dengan penerimaan hadiah atau janji terkait dengan maksud supaya pegawai negeri atau penyelenggara negara tersebut berbuat atau tidak berbuat sesuatu dalam jabatannya yang bertentangan dengan kewajibannya.
  3. Perkara TPK atas nama terdakwa HARIS ANDI SUHARMAN als HARIS SUHARMAN MANAB sehubungan dengan memberi sesuatu kepada pegawai negeri atau penyelenggara negara dengan maksud supaya pegawai negeri atau penyelenggara negara tersebut berbuat atau tidak berbuat sesuatu dalam jabatannya yang bertentangan dengan kewajibannya dalam pengalokasian anggaran bersama-sama dengan Fahd El Fouz.
- 

## **Oktober**

1. Perkara TPK atas nama terdakwa TOTO LESTIYO sehubungan dengan memberi atau menjanjikan sesuatu kepada Pegawai Negeri atau Penyelenggara Negara terkait dengan proses pengurusan Hak Guna Usaha (HGU) Perkebunan atas nama PT. Cipta Cakra Murdaya dan atau PT. Hardaya Inti Plantation yang terletak di Kecamatan Bukal Kabupaten Buol.
  2. Perkara TPK atas nama terdakwa DEDDY KUSDINAR sehubungan dengan pembangunan/pengadaan/peningkatan sarana dan prasarana olahraga di Hambalang Tahun Anggaran 2010 - 2012 pada Kementerian Pemuda dan Olahraga.
  3. Perkara TPK atas nama terdakwa RUSLI ZAINAL sehubungan dengan penilaian dan pengesahan BKUPHHK-HT pada areal yang diberika IUPHHK-HT di Kab. Pelalawan Riau Tahun 2001 - 2006 dan penilaian dan pengesahan BKUPHHK-HT pada areal yang diberika IUPHHK-HT di Kab. Siak Riau Tahun 2001 – 2007 kepada sejumlah perusahaan tidak sesuai dengan ketentuan yang berlaku; menerima hadiah atau janji terkait dengan pengajuan anggota Pemprov. Riau kepada Kemenpora dan terkait dengan pelaksanaan pekerjaan venues PON XVIII Prov. Riau; dan memberi hadiah atau janji kepada Anggota DPRD Prov. Riau terkait persetujuan perubahan Perda Prov. Riau No. 6 Tahun 2010.
  4. Perkara TPK atas nama terdakwa SIMON GUNAWAN TANJAYA sehubungan dengan memberi atau menjanjikan sesuatu kepada Pegawai Negeri atau Penyelenggara Negara untuk berbuat atau tidak berbuat sesuatu dalam jabatannya yang bertentangan dengan kewajibannya terkait dengan kegiatan yang dilakukan oleh Satuan Kerja Khusus Pelaksanaan Kegiatan Usaha Hulu Minyak dan Gas Bumi (SKK Migas) pada Tahun 2012 – 2013.
- 

## **September**

1. Perkara TPK atas nama terdakwa MUHAMMAD HIDAYAT BATUBARA sehubungan dengan pemberian sesuatu oleh PN dan atau pegawai negeri dan atau pihak-pihak tertentu Pemerintah Kabupaten Mandailing Natal kepada PN atau pegawai negeri dan atau pihak-pihak tertentu Pemerintah Propinsi Sumatera Utara terkait alokasi Dana Bantuan Daerah (DBD) tahun 2013.
2. Perkara TPK atas nama terdakwa KHAIRUL ANWAR DAULAY sehubungan dengan pemberian sesuatu oleh PN dan atau pegawai negeri dan atau pihak-pihak tertentu Pemerintah Kabupaten Mandailing Natal kepada PN atau pegawai negeri dan atau pihak-pihak tertentu Pemerintah Propinsi Sumatera Utara terkait alokasi Dana Bantuan Daerah (DBD) tahun 2013.
3. Perkara TPK atas nama terdakwa MOH. DIAN IRWAN NUQISQA dan EKO DARMAYANTO sehubungan dengan penyuaipan terkait pemeriksaan pajak yang diduga melibatkan pemeriksa pajak dengan wajib pajak PT Master Steel.
4. Perkara TPK atas nama terdakwa ZARYANA RAIT dan PIRIN WIBISONO sehubungan dengan menerima hadiah atau janji terkait dengan maksud supaya pegawai negeri atau penyelenggara negara tersebut berbuat atau tidak berbuat sesuatu dalam jabatannya yang bertentangan dengan kewajibannya.

5. Perkara TPK atas nama terdakwa DJODI SUPRATMAN sehubungan dengan pegawai negeri atau penyelenggara negara yang menerima pemberian atau janji dengan maksud supaya pegawai negeri atau penyelenggara negara tersebut berbuat atau tidak berbuat sesuatu dalam jabatannya yang bertentangan dengan kewajibannya terkait dengan pengurusan kasasi kasus pidana penipuan dengan terdakwa Hutomo Wijaya Ongowarsito.
  6. Perkara TPK atas nama terdakwa MARIO CORNELIO BERNARDO sehubungan dengan pegawai negeri atau penyelenggara negara yang menerima pemberian atau janji dengan maksud supaya pegawai negeri atau penyelenggara negara tersebut berbuat atau tidak berbuat sesuatu dalam jabatannya yang bertentangan dengan kewajibannya terkait dengan pengurusan kasasi kasus pidana penipuan dengan terdakwa Hutomo Wijaya Ongowarsito.
- 

## **Agustus**

1. Perkara TPK atas nama terdakwa BUDI SUSANTO sehubungan dengan pengadaan Driving Simulator Roda Dua (R2) dan Roda Empat (R4) pada Korps Lalu Lintas Mabes Polri TA 2011.
- 

## **Juli**

1. Perkara TPK atas nama terdakwa IYUS DJUHER sehubungan dengan penerimaan hadiah atau janji dari PT Garindo Perkasa untuk memperoleh tanah seluas +/- 1.000.000 m<sup>2</sup> yang diperlukan dalam rangka pembangunan Tempat Pemakaman Bukan Umum (TPBU) di Desa Antajaya Kecamatan Tanjungsari Kabupaten Bogor.
2. Perkara TPK atas nama terdakwa USEP JUMENO dan LISTO WELLY sehubungan dengan penerimaan hadiah atau janji dari PT Garindo Perkasa untuk memperoleh tanah seluas +/- 1.000.000 m<sup>2</sup> yang diperlukan dalam rangka pembangunan Tempat Pemakaman Bukan Umum (TPBU) di Desa Antajaya Kecamatan Tanjungsari Kabupaten Bogor.
3. Perkara TPK atas nama terdakwa PARGONO RIYADI sehubungan dengan Pegawai Negeri/Penyelenggara Negara dengan maksud menguntungkan diri sendiri atau orang lain secara melawan hukum atau dengan menyalahgunakan kekuasaannya memaksa seseorang memberikan sesuatu terkait dengan pemeriksaan pajak. (Penyidik Pegawai Negeri Sipil/PPNS pada Kanwil Dirjen Pajak Jakarta Pusat).
4. Perkara TPK atas nama terdakwa EFENDY KOMALA dan TEDDY MULIAWAN sehubungan dengan penyuapan terkait pemeriksaan pajak yang diduga melibatkan pemeriksa pajak dengan wajib pajak PT Master Steel.
5. Perkara TPK atas nama terdakwa SURUNG PANJAITAN sehubungan dengan pemberian sesuatu oleh PN dan atau pegawai negeri dan atau pihak-pihak tertentu Pemerintah Kabupaten Mandailing Natal kepada PN atau pegawai negeri dan atau pihak-pihak tertentu Pemerintah Propinsi Sumatera Utara terkait alokasi Dana Bantuan Daerah (DBD) tahun 2013.

6. Perkara TPK atas nama terdakwa DIAH SOEMEDI sehubungan dengan penyuaipan terkait pemeriksaan pajak yang diduga melibatkan pemeriksa pajak dengan wajib pajak PT Master Steel.
  7. Perkara TPK atas nama terdakwa HERRY NURHAYAT sehubungan dengan penerimaan pemberian atau janji terkait dengan penanganan perkara tindak pidana korupsi mengenai penyimpangan dana bantuan sosial Pemerintah Kota Bandung TA 2009 sd 2010 di Pengadilan Tindak Pidana Korupsi pada Pengadilan Negeri Bandung dan Pengadilan Tinggi Jawa Barat dengan terdakwa Rochman selaku Mantan Bendahara Pengeluaran Sekretariat Daerah Kota Bandung dkk.
  8. Perkara TPK atas nama terdakwa TOTO HUTAGALUNG dan ASEP TRIANA sehubungan dengan penerimaan pemberian atau janji terkait dengan penanganan perkara tindak pidana korupsi mengenai penyimpangan dana bantuan sosial Pemerintah Kota Bandung TA 2009 sd 2010 di Pengadilan Tindak Pidana Korupsi pada Pengadilan Negeri Bandung dan Pengadilan Tinggi Jawa Barat dengan terdakwa Rochman selaku Mantan Bendahara Pengeluaran Sekretariat Daerah Kota Bandung dkk.
  9. Perkara TPK atas nama terdakwa SETYA BUDI TEJO CAHYONO sehubungan dengan penerimaan pemberian atau janji terkait dengan penanganan perkara tindak pidana korupsi mengenai penyimpangan dana bantuan sosial Pemerintah Kota Bandung TA 2009 sd 2010 di Pengadilan Tindak Pidana Korupsi pada Pengadilan Negeri Bandung dan Pengadilan Tinggi Jawa Barat dengan terdakwa Rochman selaku Mantan Bendahara Pengeluaran Sekretariat Daerah Kota Bandung dkk.
- 

## **Juni**

1. Perkara TPK atas nama terdakwa GANI ABDUL GANI sehubungan dengan bersama-sama atau turut serta terkait dengan perbuatan Eddie Widiono Suwondho dalam Pengadaan Outsourcing Roll Out Customer Information System Rencana Induk Sistem Informasi (CIS-RISI) pada PT PLN (Persero) Distribusi Jakarta Raya dan Tangerang dan Hariadi Sadono dalam Pengadaan Outsourcing Pengelolaan Sistem Manajemen Pelanggan (Customer Management System) berbasis teknologi informasi pada PT PLN Distribusi Jawa Timur tahun 2004 sd 2008.
  2. Perkara TPK atas nama terdakwa SENTOT SUSILO dan NANA SUPRIYATNA sehubungan dengan memberi hadiah atau janji kepada Pegawai Negeri/Penyelenggara Negara terkait dengan Pemberian Ijin Lokasi untuk kegiatan pembangunan Tempat Pemakaman Bukan Umum (TPBU) seluas +/- 1.000.000 m<sup>2</sup> di Desa Antajaya Kecamatan Tanjungsari Kabupaten Bogor.
- 

## **Mei**

1. Perkara TPK atas nama terdakwa RATNA DEWI UMAR sehubungan dengan pengadaan alat kesehatan dan perbekalan dalam rangka wabah flu burung pada Direktorat Bina Pelayanan Medik Dasar Dirjen Bina Pelayanan Medik Departemen Kesehatan RI, pengadaan reagen dan consumable penanganan virus flu burung (avian influenza) pada Dirjen Bina Pelayanan Medik, Departemen Kesehatan RI dan pengadaan peralatan kesehatan untuk melengkapi rumah sakit rujukan penanganan flu burung (avian influenza) TA 2007 pada Dirjen Bina Pelayanan Medik Departemen Kesehatan RI.
  2. Perkara TPK atas nama terdakwa MUHAMMAD SOFYAN sehubungan dengan pengelolaan anggaran Inspektorat Jenderal Departemen Pendidikan Nasional Tahun 2009.
  3. Perkara TPK atas nama terdakwa AHMAD FATHANAH sehubungan dengan penerimaan hadiah atau janji untuk Penyelenggara Negara terkait dengan pengurusan kuota impor daging pada Kementerian Pertanian dan tindak pidana pencucian uang (TPPU).
  4. Perkara TPK atas nama terdakwa LUTHFI HASAN ISHAAQ sehubungan dengan penerimaan hadiah atau janji untuk Penyelenggara Negara terkait dengan pengurusan kuota impor daging pada Kementerian Pertanian.
- 

## **April**

1. Perkara TPK atas nama terdakwa DJOKO SUSILO sehubungan dengan pengadaan Driving Simulator Roda Dua (R2) dan Roda Empat (R4) pada Korps Lalu Lintas Mabes Polri TA 2011.
- 

## **Maret**

1. Perkara TPK atas nama terdakwa ABU BAKAR SIDDIK, TENGKU MUHAZZA, ZULFAN HERI dan TUROECHAN ASY'ARI sehubungan dengan penerimaan hadiah atau janji terkait dengan Perubahan Peraturan Daerah Prop. Riau Nomor 6 Tahun 2012 tentang Pengikatan Dana Anggaran Kegiatan Tahun Jamak Untuk Pembangunan Venues pada Kegaitan PON XVIII Prop Riau.
2. Perkara TPK atas nama terdakwa SYARIF HIDAYAT, ADRIAN ALI dan MOHD. ROEM ZEIN sehubungan dengan penerimaan hadiah atau janji terkait dengan Perubahan Peraturan Daerah Prop. Riau Nomor 6 Tahun 2012 tentang Pengikatan Dana Anggaran Kegiatan Tahun Jamak Untuk Pembangunan Venues pada Kegaitan PON XVIII Prop Riau.
3. Perkara TPK atas nama terdakwa ARYA ABDI EFFENDI alias DIO sehubungan dengan memberi atau menjanjikan sesuatu kepada penyelenggara negara terkait dengan pengurusan kuota impor daging pada Kementerian Pertanian.
4. Perkara TPK atas nama terdakwa JUARD EFFENDI sehubungan dengan memberi atau menjanjikan sesuatu kepada penyelenggara negara terkait dengan pengurusan kuota impor daging pada Kementerian Pertanian.

---

## Februari

1. -

---

## Januari

1. Perkara TPK atas nama terdakwa ABU BAKAR SIDDIK, TENGKU MUHAZZA, ZULFAN HERI dan TUROECHAN ASY'ARI sehubungan dengan penerimaan hadiah atau janji terkait dengan Perubahan Peraturan Daerah Prop. Riau Nomor 6 Tahun 2012 tentang Pengikatan Dana Anggaran Kegiatan Tahun Jamak Untuk Pembangunan Venues pada Kegaitan PON XVIII Prop Riau.
  2. Perkara TPK atas nama terdakwa SYARIF HIDAYAT, ADRIAN ALI dan MOHD. ROEM ZEIN sehubungan dengan penerimaan hadiah atau janji terkait dengan Perubahan Peraturan Daerah Prop. Riau Nomor 6 Tahun 2012 tentang Pengikatan Dana Anggaran Kegiatan Tahun Jamak Untuk Pembangunan Venues pada Kegaitan PON XVIII Prop Riau.
  3. Perkara TPK atas nama terdakwa ARYA ABDI EFFENDI alias DIO sehubungan dengan memberi atau menjanjikan sesuatu kepada penyelenggara negara terkait dengan pengurusan kuota impor daging pada Kementerian Pertanian.
  4. Perkara TPK atas nama terdakwa JUARD EFFENDI sehubungan dengan memberi atau menjanjikan sesuatu kepada penyelenggara negara terkait dengan pengurusan kuota impor daging pada Kementerian Pertanian.
- 

**Share :**

Bagikan 0

Tweet

## PENINDAKAN

Penyidikan (/id/berkas/penindakan/penyidikan)

Penuntutan (/id/berkas/penindakan/penuntutan)

Inkracht (/id/berkas/penindakan/inkracht)

Jejak Kasus (/id/jejak-kasus)













## LINK

[TENTANG ACCH \(/ID/TENTANG-ACCH\).](#)

[DISCLAIMER \(/ID/DISCLAIMER\).](#)

[KETENTUAN \(/ID/KETENTUAN\).](#)

[SITEMAP \(/ID/SITEMAP\).](#)

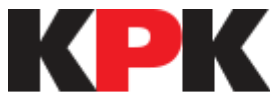

**Komisi Pemberantasan Korupsi**

[\(HTTPS://WWW.KPK.GO.ID/\)](https://www.kpk.go.id/)

## REDAKSI ACCH

KOMISI PEMBERANTASAN KORUPSI  
JL. KUNINGAN PERSADA KAV. 4 JAKARTA 12950  
TELP: (021) 2557 8300 EXT. 8642  
EMAIL: [ACCH@KPK.GO.ID](mailto:ACCH@KPK.GO.ID)  
([MAILTO:ACCH@KPK.GO.ID](mailto:ACCH@KPK.GO.ID)).
