# Supplementary material for: Democratization, leader education and growth: firm-level evidence from Indonesia
Source: Springer Nature journal article supplement (doi:10.1007/s10887-022-09221-5), 2023-02-15
Supplement: MOESM2 [file Penuntutan 2014.pdf › Data/Mayor-level corruption dataset (incl sources)/KPK Penuntutan 2011-/Penuntutan 2014.pdf]

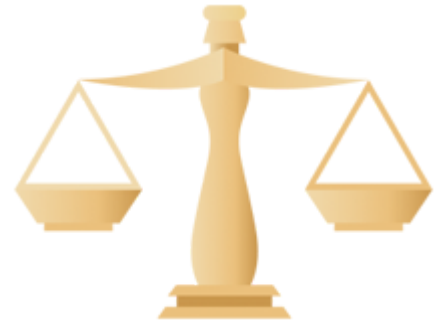

# PENINDAKAN

Menyajikan informasi perkembangan penanganan tindak pidana korupsi yang dilakukan oleh Komisi Pemberantasan Korupsi.

[Beranda \(/id/\)](#) / [Berkas](#) / [PENINDAKAN](#) / [Penuntutan \(/id/berkas/penindakan/penuntutan\)](#) / [Penuntutan 2014](#)

## PENUNTUTAN

### Penuntutan 2014

Ditulis oleh admin.acch. Diposting di [Penuntutan \(/id/berkas/penindakan/penuntutan\)](#). Dilihat: 4671

#### Desember

1. -

---

#### November

1. Perkara TPK sehubungan dengan memberi atau menjanjikan sesuatu kepada hakim dengan maksud untuk mempengaruhi putusan perkara yang diserahkan kepadanya untuk diadili terkait dengan sengketa pemilihan kepala daerah Kota Palembang di Mahkamah Konstitusi tahun 2013 dan dengan sengaja tidak memberikan keterangan atau memberikan keterangan yang tidak benar terkait dengan persidangan atas nama terdakwa M.Akil Mochtar di pengadilan tindak pidana korupsi Jakarta atas nama tersangka ROMI HERTON dan MASYITO.
2. Perkara TPK sehubungan dengan sengaja mencegah, merintangangi atau menggagalkan secara langsung maupun tidak langsung penyidikan, penuntutan, dan pemeriksaan di sidang

pengadilan terhadap tersangka atau terdakwa ataupun para saksi dalam perkara korupsi, dan dengan sengaja tidak memberi keterangan atau memberi keterangan yang tidak benar pada persidangan atas nama M. Akil Mochtar di Pengadilan Tindak Pidana Korupsi Jakarta atas nama tersangka MUHTAR EPENDY.

3. Perkara TPK sehubungan dengan pengadaan alat kesehatan Kedokteran Umum Puskesmas Kota Tangerang Selatan APBDP Tahun Anggaran 2012 atas nama tersangka MAMAK JAMAKSARI.
4. Perkara TPK sehubungan dengan pengadaan driving simulator roda dua (R 2) dan roda empat (R 4) pada Korps Lalu Lintas Mabes Polri TA. 2011 atas nama tersangka DIDIK PURNOMO.
5. Perkara TPK sehubungan dengan pegawai negeri/penyelenggara negara yang dengan maksud menguntungkan diri sendiri atau orang lain secara melawan hukum atau dengan menyalahgunakan kekuasaannya memaksa seseorang memberikan sesuatu terkait pengurusan izin Surat Persetujuan Pemanfaatan Ruang (SPPR) atas nama PT. Tatar Kertabumi di Kabupaten Karawang atas nama tersangka ADE SWARA dan NURLATIFAH.
6. Perkara TPPU sehubungan dengan perbuatan menempatkan, mentransfer, mengalihkan, membelanjakan, membayarkan, menghibahkan, menitipkan, membawa ke luar negeri, mengubah bentuk, menukarkan dengan mata uang atau surat berharga atau perbuatan lain atas Harta Kekayaan yang diketahui atau patut diduga merupakan hasil tindak pidana korupsi dengan tujuan menyembunyikan atau menyamarkan asal usul Harta Kekayaan atas nama tersangka ADE SWARA dan NURLATIFAH.
7. Perkara TPK sehubungan dengan memberi atau menjanjikan sesuatu kepada pegawai negeri atau penyelenggara negara dengan maksud supaya pegawai negeri atau penyelenggara negara tersebut berbuat atau tidak berbuat sesuatu dalam jabatannya, yang bertentangan dengan kewajibannya terkait dengan Pengajuan Revisi Alih Fungsi Hutan di Provinsi Riau Tahun 2014 kepada Kementerian Kehutanan atas nama tersangka GULAT MEDALI EMAS MANURUNG.
8. Perkara TPK sehubungan dengan Proyek Pembangunan Pusat Pendidikan Pelatihan dan Sekolah Olahraga Nasional (P3SON) di Hambalang TA 2010 – 2012 atas nama tersangka MACHFUD SUROSO.

---

## Oktober

1. -

---

## September

1. Perkara TPK atas nama terdakwa RACHMAT YASIN sehubungan dengan menerima hadiah atau janji terkait pemberian Rekomendasi Tukar Menukar Kawasan Hutan di Kabupaten Bogor atas nama PT. Bukit Jonggol Asri.

2. Perkara TPK atas nama terdakwa M.ZAIRIN sehubungan dengan bersama-sama atau turut serta Rachmat Yasin selaku Bupati Bogor dalam menerima hadiah atau janji terkait pemberian Rekomendasi Tukar Menukar Kawasan Hutan di Kabupaten Bogor atas nama PT. Bukit Jonggol Asri.
  3. Perkara TPK atas nama terdakwa RAMADHANI ISMY sehubungan dengan pelaksanaan Proyek Pembangunan Dermaga Bongkar pada kawasan perdagangan bebas dan Pelabuhan Bebas Sabang yang dibiayai Anggaran Pendapatan dan Belanja Negara (APBN) tahun 2006 – 2010.
  4. Perkara TPK atas nama terdakwa RAMLAN COMEL sehubungan dengan bersama-sama melakukan atau menyuruh melakukan atau turut serta melakukan terkait perbuatan Setya Budi Tejo Cahyono yaitu menerima pemberian atau janji terkait dengan penanganan perkara TPK mengenai penyimpangan dana bantuan sosial Pemerintah Kota Bandung TA 2009 – 2010 di Pengadilan Tindak Pidana Korupsi pada Pengadilan Negeri Bandung dan Pengadilan Tinggi Jawa Barat dengan terdakwa Rochman selaku mantan Bendahara Pengeluaran Sekretariat Daerah Kota Bandung dkk.
  5. Perkara TPK atas nama terdakwa NY. PASTI SEREFINA SINAGA sehubungan dengan bersama-sama melakukan atau menyuruh melakukan atau turut serta melakukan terkait perbuatan Setya Budi Tejo Cahyono yaitu menerima pemberian atau janji terkait dengan penanganan perkara banding TPK mengenai penyimpangan dana bantuan sosial Pemerintah Kota Bandung TA 2009 – 2010 di Pengadilan Tindak Pidana Korupsi pada Pengadilan Negeri Bandung dan Pengadilan Tinggi Jawa Barat dengan terdakwa Rochman selaku mantan Bendahara Pengeluaran Sekretariat Daerah Kota Bandung dkk.
- 

## **Agustus**

1. Perkara TPK atas nama terdakwa YESAYA SOMBUK sehubungan dengan Pegawai Negeri atau Penyelenggara tersebut berbuat atau tidak berbuat sesuatu dalam jabatannya yang bertentangan dengan kewajibannya terkait dengan pengurusan APBN-P TA 2014 pada Kementerian PDT untuk proyek pembangunan TALUD di Kabupaten Biak Numfor Provinsi Papua.
2. Perkara TPK atas nama terdakwa TEDDI RENYUT sehubungan dengan memberi atau menjanjikan sesuatu kepada Pegawai Negeri atau Penyelenggara Negara dengan maksud supaya Pegawai Negeri atau Penyelenggara Negara tersebut berbuat atau tidak berbuat sesuatu dalam jabatannya, yang bertentangan dengan kewajibannya dengan Pengurusan APBN-P TA. 2014 pada Kementerian PDT untuk Proyek Pembangunan TALUD di Kabupaten Biak Numfor Propinsi Papua.
3. Perkara TPK atas nama terdakwa HERU SULAKSONO sehubungan dengan pelaksanaan proyek pembangunan Dermaga Bongkar pada Kawasan Perdagangan Bebas dan Pelabuhan Bebas Sabang yang dibiayai Anggaran Pendapatan dan Belanja Negara (APBN) TA 2006 – 2011, yang

dilakukan oleh tersangka selaku Kepala Cabang PT. Nindya Karya Cabang Sumatera Utara dan NAD merangkap kuasa Nindya Sejati JO (kerjasama antara PT. Nindya Karya dan PT. Tuah Sejati) dan kawan-kawan.

4. Perkara TPPU atas nama terdakwa HERU SULAKSONO sehubungan dengan perbuatan menempatkan, mentransfer, mengalihkan, membelanjakan, membayarkan, menghibahkan, menitipkan, mengubah bentuk, menukarkan dengan mata uang dan atau menyembunyikan/menyamarkan asal usul, sumber lokasi, kepemilikan harta kekayaan yang diketahui atau patut diduga merupakan hasil tindak pidana.
5. Perkara TPK atas nama terdakwa ARTHA MERIS SIMBOLON sehubungan dengan memberi hadiah atau janji terkait rekomendasi penyesuaian Formula Harga Gas untuk PT. Kaltim Parna Industri kepada Kepala SKK Migas.

---

## Juli

1. Perkara TPK atas nama terdakwa SYAHRUL RAJA SEMPURNAJAYA sehubungan dengan memberi atau menjanjikan sesuatu kepada Pegawai Negeri atau Penyelenggara Negara, terkait dengan pemberian Rekomendasi Tukar Menukar Kawasan Hutan di Kabupaten Bogor atas nama PT Bukit Jonggol Asri.
2. Perkara TPK atas nama terdakwa SYAHRUL RAJA SEMPURNAJAYA sehubungan dengan penerimaan hadiah atau janji terkait penanganan perkara investasi di CV. Gold Aset/ PT. Axo Capital Futures dan atau terkait jabatan Kepala Bappebti.
3. Perkara TPPU atas nama terdakwa SYAHRUL RAJA SEMPURNAJAYA sehubungan dengan perbuatan menempatkan, mentransfer, mengalihkan, membelanjakan, membayarkan, menghibahkan, menitipkan, membawa ke luar negeri, mengubah bentuk, menukarkan dengan mata uang atau surat berharga atau perbuatan lain atas harta kekayaan yang diketahui atau patut diduganya merupakan hasil tindak pidana dengan tujuan menyembunyikan atau menyamarkan asal usul sumber, lokasi, peruntukkan, pengalihan hak-hak atau kepemilikan yang sebenarnya atas harta kekayaan yang diketahuinya atau patut diduganya merupakan hasil tindak pidana korupsi.
4. Perkara TPK atas nama terdakwa F.X. YOHAN YAP ALIAS YOHAN sehubungan dengan memberi atau menjanjikan sesuatu kepada Pegawai Negeri atau Penyelenggara Negara, terkait dengan pemberian Rekomendasi Tukar Menukar Kawasan Hutan di Kabupaten Bogor atas nama PT Bukit Jonggol Asri.
5. Perkara TPK atas nama terdakwa TAFSIR NURCHAMID sehubungan dengan pengadaan dan instalasi infrastruktur IT Gedung Perpustakaan Pusat Universitas Indonesia (UI) tahun 2010 – 2011.

---

## Juni

## Mei

1. Perkara TPK atas nama terdakwa ANAS URBANINGRUM sehubungan dengan menerima hadiah atau janji terkait dengan proses perencanaan dan pelaksanaan pembangunan proyek Pusat Pendidikan, Pelatihan dan Sekolah Olahraga Nasional (P3SON) di Desa Hambalang, Kecamatan Citeureup, Kabupaten Bogor, Provinsi Jawa Barat dan proyek-proyek lainnya.
  2. Perkara TPPU atas nama terdakwa ANAS URBANINGRUM sehubungan dengan menempatkan, mentransfer, mengalihkan, membelanjakan, membayarkan, menghibahkan, menitipkan, membawa ke luar negeri, mengubah bentuk, menukarkan, dengan mata uang atau surat berharga atau perbuatan lain atas harta kekayaan yang diketahui atau patut diduga merupakan hasil tindak pidana korupsi dengan tujuan menyembunyikan atau menyamarkan asal usul harta kekayaan dan atau menyembunyikan asal usul, sumber, lokasi, peruntukan, pengalihan hal-hak, atau kepemilikan yang sebenarnya atas harta kekayaan yang diketahui atau patut diduga merupakan hasil tindak pidana korupsi.
- 

## April

1. Perkara TPK atas nama terdakwa SUBRI sehubungan dengan menerima hadiah atau janji padahal diketahui atau patut diduga bahwa hadiah atau janji tersebut diberikan untuk menggerakkan agar melakukan atau tidak melakukan sesuatu dalam jabatannya, yang bertentangan dalam kewajibannya atau hadiah atau janji tersebut diberikan sebagai akibat atau disebabkan karena telah melakukan sesuatu dalam jabatannya yang bertentangan dengan kewajibannya terkait dengan pengurusan perkara tindak pidana menempatkan keterangan palsu di atas bukti autentik dan pemalsuan atas sertifikat tanah dengan terlapor Sugiharta Alias Along.
  2. Perkara TPK atas nama terdakwa RATU ATUT CHOSIYAH sehubungan dengan memberi atau menjanjikan sesuatu kepada hakim dengan maksud untuk mempengaruhi putusan perkara yang diserahkan kepadanya untuk diadili berkaitan dengan penanganan perkara sengketa Pemilihan Kepala Daerah (Pilkada) Kabupaten Lebak, Propinsi Banten Tahun 2013 di Mahkamah Konstitusi Republik Indonesia.
  3. Perkara TPK atas nama terdakwa SAID FAISAL sehubungan dengan sengaja tidak memberikan keterangan atau memberikan keterangan yang tidak benar dalam persidangan perkara Tindak Pidana Korupsi pada Pengadilan Negeri Pekanbaru.
- 

## Maret

1. Perkara TPK atas nama terdakwa SUDJADNAN PARNOHADININGRAT sehubungan dengan Pengelolaan Dana Penyelenggaraan Kegiatan Pertemuan-Pertemuan atau Sidang Internasional pada Departemen Luar Negeri tahun 2004 – 2005.
  2. Perkara TPK atas nama terdakwa TEUKU BAGUS MOKHAMAD NOOR sehubungan dengan Proyek Pembangunan Pusat Pendidikan Pelatihan dan Sokelah Olahraga Nasional (P3SON) di Hambalang TA 2010 – 2012.
  3. Perkara TPK atas nama terdakwa ANGGORO WIDJOJO sehubungan dengan pemberian sejumlah uang kepada Anggota Komisi IV-DPR RI dan Pejabat Departemen Kehutanan RI terkait dengan proses pengajuan anggaran Sistem Komunikasi Radio Terpadu (SKRT) pada Tahun 2007 – 2008.
- 

## **Februari**

1. -
- 

## **Januari**

1. Perkara TPK atas nama terdakwa IKE WIJAYANTO sehubungan dengan menerima pemberian hadiah/janji padahal diketahui atau patut diketahui bahwa hadiah/janji tersebut diberikan untuk menggerakkan agar melakukan atau tidak melakukan sesuatu dalam jabatannya, yang bertentangan dengan kewajibannya dan atau Pegawai negeri/Penyelenggara Negara yang pada waktu menjalankan tugas, meminta, menerima, atau memotong pembayaran kepada Pegawai Negeri/Penyelenggara Negara yang lain atau kepada Kas Umum, seolah-olah Pegawai Negeri/Penyelenggara Negara yang lain atau Kas Umum tersebut mempunyai hutang kepadanya, padahal diketahui bahwa hal tersebut bukan merupakan hutang.
2. Perkara TPK atas nama terdakwa ASMADINATA sehubungan dengan bersama-sama melakukan atau turut serta melakukan terkait perbuatan Kartini Juliana M Marpaung, yaitu menerima pemberian atau hadiah atau janji terkait dengan penanganan perkara tindak pidana korupsi dalam penyimpangan anggaran pemeliharaan mobil dinas Sekretariat DPRD Kab. Grobogan Tahun Anggaran 2006 – 2008 atas nama terdakwa Muhammad Yaeni di Pengadilan Tipikor pada PN. Semarang.
3. Perkara TPK atas nama terdakwa PRAGSONO sehubungan dengan bersama-sama melakukan atau turut serta melakukan terkait perbuatan Kartini Juliana M Marpaung, yaitu menerima pemberian atau hadiah atau janji terkait dengan penanganan perkara tindak pidana korupsi dalam penyimpangan anggaran pemeliharaan mobil dinas Sekretariat DPRD Kab. Grobogan Tahun Anggaran 2006 – 2008 atas nama terdakwa Muhammad Yaeni di Pengadilan Tipikor pada PN. Semarang.

4. Perkara TPK atas nama terdakwa M. AKIL MOCHTAR sehubungan dengan menerima hadiah atau janji dalam jabatannya selaku Hakim berkaitan dengan penanganan perkara sengketa Pemilihan Kepala Daerah (Pilkada) Kab. Gunung Mas Prov. Kalimantan Tengah dan Kab. Lebak Prov. Banten Tahun 2013 dan penanganan perkara lain yang berada di lingkup kewenangan Mahkamah Konstitusi Republik Indonesia, padahal patut diketahui atau patut diduga bahwa hadiah atau janji tersebut diberikan untuk mempengaruhi putusan perkara yang diserahkan dan diduga melakukan tindak pidana pencucian uang sehubungan dengan perbuatan menempatkan, mentransfer, mengubah bentuk, atau menyembunyikan/ menyamarkan asal usul, sumber, lokasi, kepemilikan, atau perbuatan menerima atau menguasai penempatan, pentransferan, pembayaran, atau menggunakan harta kekayaan yang diketahui, atau patut diduga merupakan hasil tindak pidana.
5. Perkara TPK atas nama terdakwa SUSI TUR ANDYANI sehubungan dengan turut serta atau membantu menerima hadiah atau janji oleh hakim berkaitan dengan penanganan perkara sengketa Pemilihan Kepala Daerah (Pilkada) Kabupaten Lebak, Propinsi Banten Tahun 2013 di Mahkamah Konstitusi Republik Indonesia, padahal diketahui atau Patut diduga bahwa hadiah atau janji tersebut diberikan untuk mempengaruhi putusan perkara yang diserahkan kepadanya untuk diadili.
6. Perkara TPK atas nama terdakwa TUBAGUS CHAERI WARDANA CHASAN sehubungan dengan memberi sesuatu kepada hakim dengan maksud untuk mempengaruhi putusan perkara yang diserahkan kepadanya untuk diadili berkaitan dengan penanganan perkara sengketa Pemilihan Kepala Daerah (Pilkada) Kabupaten Lebak, Propinsi Banten Tahun 2013 di Mahkamah Konstitusi Republik.

---

**Share :**

Bagikan 0

Tweet

## PENINDAKAN

Penyidikan (/id/berkas/penindakan/penyidikan)

Penuntutan (/id/berkas/penindakan/penuntutan)

Inkracht (/id/berkas/penindakan/inkracht)

Jejak Kasus (/id/jejak-kasus)













## LINK

[TENTANG ACCH \(/ID/TENTANG-ACCH\).](#)

[DISCLAIMER \(/ID/DISCLAIMER\).](#)

[KETENTUAN \(/ID/KETENTUAN\).](#)

[SITEMAP \(/ID/SITEMAP\).](#)

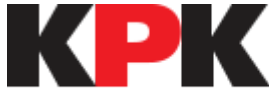

**Komisi Pemberantasan Korupsi**

[\(HTTPS://WWW.KPK.GO.ID/\)](https://www.kpk.go.id/)

## REDAKSI ACCH

KOMISI PEMBERANTASAN KORUPSI  
JL. KUNINGAN PERSADA KAV. 4 JAKARTA 12950  
TELP: (021) 2557 8300 EXT. 8642  
EMAIL: [ACCH@KPK.GO.ID](mailto:ACCH@KPK.GO.ID)  
([MAILTO:ACCH@KPK.GO.ID](mailto:ACCH@KPK.GO.ID)).
