# Supplementary material for: Democratization, leader education and growth: firm-level evidence from Indonesia
Source: Springer Nature journal article supplement (doi:10.1007/s10887-022-09221-5), 2023-02-15
Supplement: MOESM2 [file Penuntutan 2015.pdf › Data/Mayor-level corruption dataset (incl sources)/KPK Penuntutan 2011-/Penuntutan 2015.pdf]

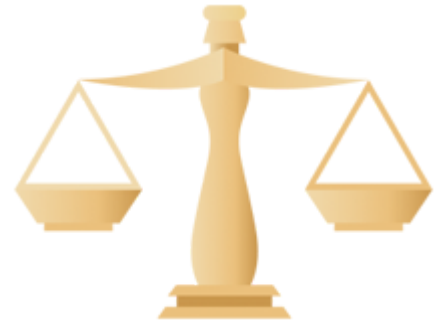

# PENINDAKAN

Menyajikan informasi perkembangan penanganan tindak pidana korupsi yang dilakukan oleh Komisi Pemberantasan Korupsi.

[Beranda \(/id/\)](#) / [Berkas](#) / [PENINDAKAN](#) / [Penuntutan \(/id/berkas/penindakan/penuntutan\)](#) / [Penuntutan 2015](#)

## PENUNTUTAN

### Penuntutan 2015

Ditulis oleh admin.acch. Diposting di [Penuntutan \(/id/berkas/penindakan/penuntutan\)](#). Dilihat: 4927

#### Desember

1. Perkara TPK atas nama terdakwa SETIADY JUSUF dan IRENIUS ADII sehubungan dengan memberi hadiah atau janji kepada Dewi Aryaliniza Als Dewie Yasin Limpo selaku anggota DPR RI bersama-sama dengan Bambang Wahyuhadi dan Rinelda Bandaso terkait usulan penganggaran Proyek Pembangunan Infrastruktur Energi Baru dan Terbarukan TA 2016 untuk Kabupaten Deiyai Propinsi Papua.

---

#### November

1. Perkara TPK atas nama terdakwa MOH. YAGARI BHASTARA GUNTUR sehubungan dengan Memberi atau Menjanjikan sesuatu berupa uang kepada Majelis Hakim dan Panitera Pengadilan Tata Usaha Negara (PTUN) Medan Sumatera Utara yang dilakukan oleh Tersangka selaku salah seorang Kuasa Hukum dari Kepala Biro Keuangan Sekretariat Daerah Propinsi

Sumatera Utara terkait permohonan pengujian kewenangan Kejaksaan Tinggi Sumatera Utara sesuai dengan Undang-Undang Nomor 30 Tahun 2014 tentang Administrasi Pemerintahan atas penyelidikan tentang dugaan terjadinya Tindak Pidana Korupsi Dana Bantuan Sosial (BANSOS), Bantuan Daerah Bawahan (BDB), Bantuan Operasional Sekolah (BOS) dan Penahanan Pencairan Dana Bagi Hasil (DBH).

2. Perkara TPK atas nama terdakwa IRAWAN sehubungan dengan Pengadaan dan Pelaksanaan Proyek Pembangunan Diklat Pelayaran Sorong Tahap III pada Pusat Pengembangan Sumber Daya Manusia Perhubungan Laut, Badan Pengembangan Sumber Daya Manusia Perhubungan, Kementerian Perhubungan Republik Indonesia TA 2011.
3. Perkara TPK atas nama terdakwa SUGIARTO sehubungan dengan Pengadaan dan Pelaksanaan Proyek Pembangunan Diklat Pelayaran Sorong Tahap III pada Pusat Pengembangan Sumber Daya Manusia Perhubungan Laut, Badan Pengembangan Sumber Daya Manusia Perhubungan, Kementerian Perhubungan Republik Indonesia TA 2011.
4. Perkara TPK atas nama terdakwa JAMALUDDIEN MALIK sehubungan dengan pegawai negeri atau penyelenggara negara yang dengan maksud menguntungkan diri sendiri atau orang lain yang secara melawan hukum atau menyalahgunakan kekuasaannya memaksa seseorang memberikan sesuatu, membayar, atau menerima pembayaran dengan potongan atau untuk mengerjakan sesuatu bagi dirinya sendiri atau yang pada waktu menjalankan tugas, meminta, menerima, memotong pembayaran kepada pegawai negeri atau penyelenggara negara lain atau kas umum tersebut mempunyai utang kepadanya, padahal diketahui bahwa hal tersebut bukan merupakan utang terkait dana kegiatan Tahun Anggaran 2013 – 2014 dan dana tugas pembantuan Tahun Anggaran 2014 pada Direktorat Jenderal Pembinaan Pembangunan Kawasan Transmigrasi Kementerian Tenaga Kerja dan Transmigrasi (Ditjen P2KTrans).
5. Perkara TPK atas nama terdakwa HENGKY WIDJAJA sehubungan dengan pelaksanaan Kerjasama Rehabilitasi, Kelola dan Transfer untuk Instalasi Pengolahan Air antara PDAM Kota Makassar dengan pihak swasta periode tahun 2006 – 2011.
6. Perkara TPK atas nama terdakwa AMIR FAUZI sehubungan dengan menerima pemberian atau janji terkait dengan penanganan perkara permohonan pengujian kewenangan Kejaksaan Tinggi Sumatera Utara sesuai dengan Undang-Undang Nomor 30 Tahun 2014 tentang Administrasi Pemerintahan atas Penyelidikan tentang dugaan terjadinya Tindak Pidana Korupsi Dana Bantuan Sosial (BANSOS), Bantuan Daerah Bawahan (BDB), Bantuan Operasional Sekolah (BOS) dan Penahanan Pencairan Dana Bagi Hasil (DBH).
7. Perkara TPK atas nama terdakwa MUHAMMAD NAZARUDDIN sehubungan dengan penerimaan hadiah atau janji padahal patut diketahui atau diduga bahwa hadiah tersebut diberikan sebagai akibat atau disebabkan karena telah melakukan atau tidak melakukan sesuatu dalam jabatannya yang bertentangan dengan kewajibannya sehubungan dengan penganggaran dan pelaksanaan proyek yang dikerjakan oleh PT. DGI dan lain-lain tahun 2010 dan perkara TPPU terkait dengan TPK sehubungan dengan transaksi pembelian saham PT.

- Garuda di Mandiri Sekuritas oleh PT. Permai Raya Wisata, PT. Cakrawaja Abadi, PT. Exartech Teknologi Utama, PT. Pasific Putra Metropolitan, PT. Darmakusumah dan transaksi lainnya.
8. Perkara TPK atas nama terdakwa ILHAM ARIEF SIRADJUDDIN sehubungan dengan pelaksanaan Kerjasama Rehabilitasi, Kelola dan Transfer untuk Instalasi Pengolahan Air antara PDAM Kota Makassar dengan Pihak Swasta periode Tahun 2005 – 2013.
  9. Perkara TPK atas nama terdakwa GATOT PUJO NUGROHO dan EVY SUSANTI sehubungan dengan memberi atau menjanjikan sesuatu berupa uang kepada Majelis Hakim dan Panitera Pengadilan Tata Usaha Negara (PTUN) Medan Sumatera Utara terkait permohonan pengujian kewenangan Kejaksaan Tinggi Sumatera Utara sesuai dengan Undang-Undang Nomor 30 Tahun 2014 tentang Administrasi Pemerintahan atas penyelidikan tentang dugaan terjadinya Tindak Pidana Korupsi Dana Bantuan Sosial (BANSOS), Bantuan Daerah Bawahan (BDB), Bantuan Operasional Sekolah (BOS) dan Penahanan Pencairan Dana Bagi Hasil (DBH).
  10. Perkara TPK atas nama terdakwa GATOT PUJO NUGROHO dan EVY SUSANTI sehubungan dengan memberi atau menjanjikan sesuatu berupa uang kepada Majelis Hakim dan Panitera Pengadilan Tata Usaha Negara (PTUN) Medan Sumatera Utara terkait permohonan pengujian kewenangan Kejaksaan Tinggi Sumatera Utara sesuai dengan Undang-Undang Nomor 30 Tahun 2014 tentang Administrasi Pemerintahan atas penyelidikan tentang dugaan terjadinya Tindak Pidana Korupsi Dana Bantuan Sosial (BANSOS), Bantuan Daerah Bawahan (BDB), Bantuan Operasional Sekolah (BOS) dan Penahanan Pencairan Dana Bagi Hasil (DBH).
- 

## Oktober

1. Perkara TPK atas nama terdakwa PATRICE RIO CAPELLA sehubungan dengan menerima hadiah atau janji dari Gatot Pujo Nugroho selaku Gubernur Sumut dan Evy Susanti terkait dugaan TPK Dana bantuan Sosial (Bansos), Bantuan Daerah Bawah (BDB), Bantuan Operasional Sekolah (BOS), Tunggakan Dana Bagi Hasil (DBH), dan penyertaan modal pada sejumlah BUMD pada Pemerintah Provinsi Sumatera Utara yang sedang dilakukan penyelidikan oleh Kejaksaan Tinggi Sumatera Utara dan atau Kejaksaan Agung RI.
- 

## September

1. Perkara TPK atas nama terdakwa BUDI ANTONI ALJUFRI dan SUZANA BUDI ANTONI sehubungan dengan memberi atau menjanjikan sesuatu kepada hakim dengan maksud untuk mempengaruhi putusan perkara yang diserahkan kepadanya untuk diadili terkait dengan sengketa pemilihan kepala daerah Kabupaten Empat Lawang di Mahkamah Konstitusi tahun 2013 dan dengan sengaja tidak memberikan keterangan atau memberikan keterangan yang tidak benar pada waktu persidangan terdakwa M. Akil Mochtar di pengadilan TPK Jakarta.

2. Perkara TPK atas nama terdakwa AMIR HAMZAH dan KASMIN sehubungan dengan memberi atau menjanjikan sesuatu kepada hakim dengan maksud untuk mempengaruhi putusan perkara yang diserahkan kepadanya untuk diadili berkaitan dengan penanganan perkara sengketa Pemilihan Kepala Daerah (Pilkada) Kabupaten Lebak, Propinsi Banten Tahun 2013 di Mahkamah Konstitusi Republik Indonesia atau memberi hadiah atau janji kepada pegawai negeri dengan mengingat kekuasaan atau wewenang yang melekat pada jabatan atau kedudukannya, atau oleh pemberi hadiah atau janji dianggap melekat pada jabatan atau kedudukan tersebut.
3. Perkara TPK Atas nama terdakwa AMIR FAUZI sehubungan dengan menerima pemberian atau janji terkait dengan penanganan perkara permohonan pengujian kewenangan Kejaksaan Tinggi Sumatera Utara sesuai dengan Undang-Undang Nomor 30 Tahun 2014 tentang Administrasi Pemerintahan atas Penyelidikan tentang dugaan terjadinya Tindak Pidana Korupsi Dana Bantuan Sosial (BANSOS), Bantuan Daerah Bawahan (BDB), Bantuan Operasional Sekolah (BOS) dan Penahanan Pencairan Dana Bagi Hasil (DBH).
4. Perkara TPK Atas nama terdakwa DERMAWAN GINTING sehubungan dengan menerima pemberian atau janji terkait dengan penanganan perkara permohonan pengujian kewenangan Kejaksaan Tinggi Sumatera Utara sesuai dengan Undang-Undang Nomor 30 Tahun 2014 tentang Administrasi Pemerintahan atas Penyelidikan tentang dugaan terjadinya Tindak Pidana Korupsi Dana Bantuan Sosial (BANSOS), Bantuan Daerah Bawahan (BDB), Bantuan Operasional Sekolah (BOS) dan Penahanan Pencairan Dana Bagi Hasil (DBH).
5. Perkara TPK atas nama terdakwa MADE MEREGAWA sehubungan dengan Pengadaan Alat Kesehatan Rumah Sakit Khusus Pendidikan Penyakit Infeksi dan Pariwisata Universitas Udayana pada Tahun Anggaran 2009.
6. Perkara TPK atas nama terdakwa IRAWAN sehubungan dengan Pengadaan dan Pelaksanaan Proyek Pembangunan Diklat Pelayaran Sorong Tahap III pada Pusat Pengembangan Sumber Daya Manusia Perhubungan Laut, Badan Pengembangan Sumber Daya Manusia Perhubungan, Kementerian Perhubungan Republik Indonesia TA 2011.
7. Perkara TPK atas nama terdakwa SUGIARTO sehubungan dengan Pengadaan dan Pelaksanaan Proyek Pembangunan Diklat Pelayaran Sorong Tahap III pada Pusat Pengembangan Sumber Daya Manusia Perhubungan Laut, Badan Pengembangan Sumber Daya Manusia Perhubungan, Kementerian Perhubungan Republik Indonesia TA 2011.
8. Perkara TPK atas nama terdakwa BUDI RACHMAT KURNIAWAN sehubungan dengan Pengadaan dan Pelaksanaan Proyek Pembangunan Diklat Pelayaran Sorong Tahap III pada Pusat Pengembangan Sumber Daya Manusia Perhubungan Laut, Badan Pengembangan Sumber Daya Manusia Perhubungan, Kementerian Perhubungan Republik Indonesia TA 2011.
9. Perkara TPK atas nama terdakwa ILHAM ARIEF SIRADJUDDIN sehubungan dengan pelaksanaan Kerjasama Rehabilitasi, Kelola dan Transfer untuk Instalasi Pengolahan Air antara PDAM Kota Makassar dengan Pihak Swasta periode Tahun 2005 – 2013.

10. Perkara TPK atas nama terdakwa TEUKU SYAIFUL ACHMAD sehubungan dengan pelaksanaan proyek pembangunan dermaga bongkar pada kawasan perdagangan bebas dan pelabuhan bebas Sabang yang dibiayai Anggaran Pendapatan dan Belanja Negara (APBN) TA 2006 – 2010.
  11. Perkara TPK atas nama terdakwa TRIPENI IRIANTO PUTRO sehubungan dengan menerima pemberian atau janji terkait dengan penanganan perkara permohonan pengujian kewenangan Kejaksaan Tinggi Sumatera Utara sesuai dengan Undang-Undang Nomor 30 Tahun 2014 tentang Administrasi Pemerintahan atas Penyelidikan tentang dugaan terjadinya Tindak Pidana Korupsi Dana Bantuan Sosial (BANSOS), Bantuan Daerah Bawahan (BDB), Bantuan Operasional Sekolah (BOS) dan Penahanan Pencairan Dana Bagi Hasil (DBH).
  12. Perkara TPK atas nama terdakwa A. KIRJUHARI sehubungan dengan pegawai negeri atau penyelenggara negara yang secara bersama-sama menerima pemberian atau janji dengan maksud supaya pegawai negeri atau penyelenggara negara tersebut berbuat atau tidak berbuat sesuatu dalam jabatannya, yang bertentangan dengan kewajibannya terkait dengan pembahasan RAPBD.P Tahun 2014 dan atau RAPBD.P Tahun 2015 pada Provinsi Riau.
- 

## **Agustus**

1. Perkara TPK atas nama terdakwa JEFFERSON SM RUMAJAR sehubungan dengan penggunaan dana kas daerah Pemerintah kota Tomohon TA 2009 dan 2010.
2. Perkara TPK atas nama terdakwa JEFFERSON SM RUMAJAR sehubungan dengan penerimaan hadiah atau pemberian berupa uang kepada pemeriksa Badan Pemeriksa Keuangan Sulawesi Utara pada tahun 2008 atas laporan keuangan Pemerintah Kota Tomohon TA.2007.
3. Perkara TPK atas nama terdakwa ADRIANSYAH sehubungan dengan penerimaan hadiah terkait dengan kegiatan usaha PT. Mitra Maju Sukses dan/atau Group di Wilayah Kabupaten Tanah Laut Provinsi Kalimantan Selatan.
4. Perkara TPK atas nama terdakwa SURYADHARMA ALI sehubungan dengan penggunaan DOM (Dana Operasional Menteri) pada Kementerian Agama RI tahun 2011 – 2014.
5. Perkara TPK atas nama terdakwa OTTO CORNELIS KALIGIS sehubungan dengan bersama-sama atau turut serta memberi atau menjanjikan sesuatu berupa uang kepada Majelis Hakim dan Panitera Pengadilan Tata Usaha Negara (PTUN) Medan Sumatera Utara.
6. Perkara TPK atas nama terdakwa SYAMSUDDIN FEI dan FAISYAR sehubungan dengan pemberian hadiah atau janji kepada Anggota Dewan Perwakilan Rakyat Daerah (DPRD) Kabupaten Musi Banyuasin yang terkait dengan persetujuan Laporan Keterangan Pertanggungjawaban (LKPJ) Kepala Daerah Musi Banyuasin Tahun Anggaran 2014 dan pengesahan Anggaran Pendapatan dan Belanja Daerah (APBD) Kabupaten Musi Banyuasin Tahun Anggaran 2015.

7. Perkara TPK atas nama terdakwa SYAMSIR YUSFAN sehubungan dengan menerima pemberian atau janji terkait dengan penanganan perkara permohonan pengujian kewenangan Kejaksaan Tinggi Sumatera Utara sesuai dengan Undang-Undang Nomor 30 Tahun 2014 tentang Administrasi Pemerintahan atas Penyelidikan tentang dugaan terjadinya Tindak Pidana Korupsi Dana Bantuan Sosial (BANSOS), Bantuan Daerah Bawahan (BDB), Bantuan Operasional Sekolah (BOS) dan Penahanan Pencairan Dana Bagi Hasil (DBH), dan Perkara TPK sehubungan dengan bersama-sama memberi atau menjanjikan sesuatu berupa uang kepada Majelis Hakim dan Panitera Pengadilan Tata Usaha Negara (PTUN) Medan Sumatera Utara terkait permohonan pengujian kewenangan Kejaksaan Tinggi Sumatera Utara sesuai dengan Undang-Undang Nomor 30 Tahun 2014 tentang Administrasi Pemerintahan atas Penyelidikan tentang dugaan terjadinya Tindak Pidana Korupsi Dana Bantuan Sosial (BANSOS), Bantuan Daerah Bawahan (BDB), Bantuan Operasional Sekolah (BOS) dan Penahanan Pencairan Dana Bagi Hasil (DBH).
8. Perkara TPK atas nama terdakwa BAMBANG KARIYANTO dan ADAM MUNANDAR sehubungan dengan menerima hadiah atau janji terkait dengan persetujuan Laporan Keterangan Pertanggungjawaban (LKPJ) Kepala Daerah Musi Banyuasin Tahun Anggaran 2014 dan pengesahan Anggaran Pendapatan dan Belanja Daerah (APBD) Kabupaten Musi Banyuasin Tahun Anggaran 2015.
9. Perkara TPK atas nama terdakwa BAMBANG WIRATMADJI SOEHARTO sehubungan dengan bersama-sama melakukan atau turut serta melakukan terkait perbuatan Lusita Anie Razak, yaitu : memberi atau menjanjikan sesuatu kepada pegawai negeri atau penyelenggara negara dengan maksud supaya pegawai negeri atau penyelenggara negara tersebut berbuat atau tidak berbuat sesuatu dalam jabatannya yang bertentangan dengan kewajibannya atau memberi sesuatu kepada pegawai negeri atau penyelenggara negara karena atau berhubungan dengan sesuatu yang bertentangan dengan kewajiban dilakukan atau tidak dilakukan dalam jabatannya terkait dengan pengurusan perkara tindak pidana menempatkan keterangan palsu di atas bukti autentik dan pemalsuan atas sertifikat tanah dengan terlapor Sugiharta Alias Along.
10. Perkara TPK atas nama terdakwa JERO WACIK sehubungan dengan menguntungkan diri sendiri atau orang lain secara melawan hukum atau menyalahgunakan kekuasaannya memaksa seseorang memberikan sesuatu, membayar, atau untuk mengerjakan sesuatu bagi dirinya sendiri, pada tahun 2011 s/d 2013, di Kementerian Energi dan Sumber Daya Mineral.
11. Perkara TPK atas nama terdakwa JERO WACIK sehubungan dengan memperkaya diri sendiri atau orang lain atau penyalahgunaan kewenangan, kesempatan atau sarana yang ada padanya karena jabatan atau kedudukan yang dapat merugikan keuangan negara yang dilakukan oleh Menteri Kebudayaan dan Pariwisata/Menteri Pariwisata dan Ekonomi Kreatif pada Tahun 2008 – 2011.

1. Perkara TPK atas nama terdakwa RUSLI SIBUA sehubungan dengan memberi atau menjanjikan sesuatu kepada hakim dengan maksud untuk mempengaruhi putusan perkara yang diserahkan kepadanya untuk diadili terkait dengan sengketa pemilihan kepala daerah Kabupaten Pulau Morotai di Mahkamah Konstitusi tahun 2011.
  2. Perkara TPK atas nama terdakwa HASSAN WIDJAJA sehubungan dengan memberi atau menjanjikan sesuatu kepada pegawai negeri atau penyelenggara negara terkait permintaan izin Operasional PT. Indokliring Internasional yang dikeluarkan Badan Pengawas Perdagangan Berjangka Komoditi (Bappebti).
  3. Perkara TPK atas nama terdakwa DADANG PRIJATNA sehubungan dengan pengadaan alat kesehatan Kedokteran Umum Puskesmas Kota Tangerang Selatan APBDP Tahun Anggaran 2012.
- 

## **Juni**

1. Perkara TPK atas nama terdakwa ANDREW HIDAYAT sehubungan dengan pemberian hadiah terkait dengan kegiatan usaha PT. MITRA MAJU SUKSES dan Group di wilayah Kabupaten Tanah Laut Propinsi Kalimantan Selatan.
  2. Perkara TPK atas nama terdakwa JANNES JOHAN KARUBABA sehubungan dengan turut serta atau bersama-sama dengan Barbanas Suebu dalam kegiatan Detail Engineering Design (DED) PLTA Sungai Memberamo dan Sungai Urumuka tahun 2009 dan 2010 di Provinsi Papua.
  3. Perkara TPK atas nama terdakwa LA MUSI DIDI sehubungan dengan kegiatan Detail Engineering Design (DED) PLTA sungai Memberamo dan sungai Urumuka tahun 2009 dan 2010 di Provinsi Papua dan TPK dalam kegiatan Detail Engineering Design (DED) PLTA Danau Sentani dan Danau Paniai Tahun 2008 di Provinsi Papua dan Perkara TPK sehubungan dengan kegiatan Detail Engineering Design (DED) PLTA Danau Sentani dan Danau Paniani Tahun Anggaran 2008 di Provinsi Papua.
  4. Perkara TPK atas nama terdakwa BARNABAS SUEBU sehubungan dengan kegiatan Detail Engineering Design (DED) PLTA sungai Memberamo dan sungai Urumuka Tahun 2009 dan 2010 di Propinsi Papua dan TPK dalam kegiatan Detail Engineering Design (DED) PLTA danau Sentani dan danau Paniai tahun 2008 di Propinsi Papua dan Perkara TPK sehubungan dengan kegiatan Detail Engineering Design (DED) PLTA Danau Sentani dan Danau Paniani Tahun Anggaran 2008 di Provinsi Papua.
  5. Perkara TPK atas nama terdakwa RIZAL ABDULLAH sehubungan dengan Kegiatan Pembangunan Wisma Atlet dan Gedung Serbaguna Pemerintah Propinsi Sumatera Selatan Tahun 2010-2011.
- 

## **Mei**

1. Perkara TPK atas nama terdakwa ZAINI ARONY sehubungan dengan Proses Permohonan Izin Pengembangan Kawasan Wisata di Lombok Barat Tahun 2010 s.d. 2012.
  2. Perkara TPK atas nama terdakwa MOCH BIHAR SAKTI WIBOWO sehubungan dengan memberi atau menjanjikan sesuatu kepada pegawai negeri atau penyelenggara negara terkait permintaan izin Operasional PT. Indokliring Internasional yang dikeluarkan Badan Pengawas Perdagangan Berjangka Komoditi (Bappebti).
  3. Perkara TPK atas nama SHERMAN RANA KRISNA sehubungan dengan memberi atau menjanjikan sesuatu kepada pegawai negeri atau penyelenggara negara terkait permintaan izin Operasional PT. Indokliring Internasional yang dikeluarkan Badan Pengawas Perdagangan Berjangka Komoditi (Bappebti).
  4. Perkara TPK atas nama terdakwa MULYA A HASJMY sehubungan dengan pelaksanaan pengadaan peralatan medik dari sisa dana pelayanan kesehatan bagi penduduk miskin dalam rangka wabah flu burung (Avian Influenza) pada Dirjen Bina Pelayanan Medik Departemen Kesehatan dan dalam pelaksanaan pengadaan peralatan kesehatan penanganan wabah flu burung (Avian Influenza) dana APBN-P Sekretariat Dirjen Bina Pelayanan Medik Depkes TA 2006.
  5. Perkara TPK atas nama terdakwa SUROSO ATMO MARTOYO sehubungan dengan penerimaan sesuatu atau uang yang didua diberikan oleh Direktur PT. Sugih Interjaya dkk terkait dengan proyek pengadaan Tethra Ethyl Lead (TEL) di PT. Pertamina (Persero) tahun 2004 – 2005.
- 

## April

1. Perkara TPK atas nama terdakwa SYAEFUL JAMIL sehubungan dengan Pelaksanaan Tukar Guling tanah antara Pemerintah Kota Tegal dengan pihak swasta pada tahun 2012.
2. Perkara TPK atas nama terdakwa IKMAL JAYA sehubungan dengan pelaksanaan tukar guling tanah antara Pemerintah Kota Tegal dengan pihak Swasta pada tahun 2012.
3. Perkara TPK atas nama terdakwa FUAD AMIN sehubungan dengan menerima hadiah atau janji terkait dengan jual beli gas alam untuk pembangkit listrik di Gresik dan Gili Timur Bangkalan Madura, Jawa Timur dan Proyek-proyek lainnya.
4. Perkara TPK atas nama terdakwa WARYONO KARNO sehubungan dengan menerima hadiah atau janji terkait kegiatan pada Kementerian Energi dan Sumber Daya Mineral dan kegiatan lainnya.
5. Perkara TPK atas nama terdakwa WARYONO KARNO sehubungan dengan kegiatan Sosialisasi Sektor Energi dan Sumber Daya Mineral Bahan Bakar Bersubsidi; Kegiatan Sepeda Sehat Dalam Rangka Sosialisasi Hemat Energi; dan Perawatan Gedung Kantor Sekretariat Jenderal di Kementerian Energi dan Sumber Daya Mineral TA 2012.
6. Perkara TPK atas nama terdakwa WILLY SEBASTIAN LIM sehubungan dengan memberikan sesuatu atau uang kepada Direktur Pengolahan PT. Pertamina Persero dan pihak lainnya terkait



## **Maret**

1. Perkara TPK atas nama terdakwa SUTAN BHATTOEGANA sehubungan dengan menerima hadiah atau janji terkait Penetapan Anggaran Pendapatan dan Belanja Negara Perubahan (APBN-P) Tahun Anggaran 2013 Kementerian Energi dan Sumber Daya Mineral (ESDM) oleh Komisi VII DPR RI dan kegiatan lainnya.
  2. Perkara TPK atas nama terdakwa ABDUR ROUF sehubungan dengan menerima hadiah atau janji terkait dengan jual beli Gas Alam untuk Pembangkit Listrik di Gresik dan Gili Timur Bangkalan Madura, Jawa Timur dan proyek-proyek lainnya.
- 

## **Februari**

1. -
- 

## **Januari**

1. Perkara TPK atas nama terdakwa SURUNG PANJAITAN sehubungan dengan memberi atau menjanjikan sesuatu kepada Penyelenggara Negara untuk mendapatkan proyek yang terkait dengan dana Bantuan Daerah Bawahan (BDB) dari Pemerintah Provinsi Sumatera Utara kepada Pemerintah Kabupaten Mandailing Natal yang bersumber dari APBD Provinsi Sumatera Utara Tahun Anggaran 2003.
2. Perkara TPK atas nama terdakwa AHMAD JAUHARI sehubungan dengan pengadaan pekerjaan penggandaan Kitab Suci Al - Qur'an yang dananya dari APBN-P Tahun 2011 dan APBN Tahun 2012 pada Direktorat Bimas Islam Kementerian Agama RI.
3. Perkara TPK atas nama terdakwa IKE WIJAYANTO sehubungan dengan menerima pemberian hadiah/janji padahal diketahui atau patut diketahui bahwa hadiah/janji tersebut diberikan untuk menggerakkan agar melakukan atau tidak melakukan sesuatu dalam jabatannya, yang bertentangan dengan kewajibannya dan atau Pegawai negeri/Penyelenggara Negara yang pada waktu menjalankan tugas, meminta, menerima, atau memotong pembayaran kepada Pegawai Negeri/Penyelenggara Negara yang lain atau kepada Kas Umum, seolah-olah Pegawai Negeri/Penyelenggara Negara yang lain atau Kas Umum tersebut mempunyai hutang kepadanya, padahal diketahui bahwa hal tersebut bukan merupakan hutang.
4. Perkara TPPU atas nama terdakwa IKE WIJAYANTO sehubungan dengan perbuatan menempatkan, mentransfer, mengalihkan, membelanjakan, membayarkan, menghibahkan, menitipkan, membawa ke luar negeri, mengubah bentuk, menukarkan dengan mata uang atau surat berharga atau lain atas harta kekayaan yang diketahuinya atau patut diduganya

merupakan hasil tindak pidana dengan tujuan menyembunyikan atau menyamarkan asal usul Harta Kekayaan, atau perbuatan menyembunyikan atau menyamarkan asal usul, sumber, lokasi, peruntukan, pengalihan hak-hak, atau kepemilikan yang sebenarnya atas harta kekayaan yang diketahuinya atau patut diduganya merupakan hasil tindak pidana.

5. Perkara TPK atas nama terdakwa M. AKIL MOCHTAR sehubungan dengan menerima hadiah atau janji oleh Hakim berkaitan dengan penanganan perkara sengketa Pemilihan Kepala Daerah (Pilkada) Kabupaten Gunung Mas Provinsi Kalimantan Tengah 2013 di Mahkamah Konstitusi RI.
6. Perkara TPK atas nama terdakwa M. AKIL MOCHTAR sehubungan dengan menerima hadiah atau janji oleh Hakim berkaitan dengan penanganan perkara sengketa Pemilihan Kepala Daerah (Pilkada) Kabupaten Lebak Provinsi Banten 2013 di Mahkamah Konstitusi Republik Indonesia.
7. Perkara TPK atas nama terdakwa M. AKIL MOCHTAR sehubungan dengan menerima hadiah atau janji oleh Hakim berkaitan dengan penanganan perkara yang berada di lingkup kewenangan Mahkamah Konstitusi RI untuk mengadili, padahal diketahui atau patut diduga bahwa hadiah atau janji tersebut diberikan untuk mempengaruhi putusan perkara yang diserahkan kepadanya untuk diadili, dan atau penerimaan gratifikasi.
8. Perkara TPPU atas nama terdakwa M. AKIL MOCHTAR sehubungan dengan hubungannya dengan perbuatan menempatkan, mentransfer, mengalihkan, membelanjakan, membayarkan, menghibahkan, menitipkan, membawa ke luar negeri, mengubah bentuk, menukarkan dengan mata uang atau surat berharga atau perbuatan lain atas harta kekayaan yang diketahui atau patut diduganya hasil TPK dengan tujuan menyembunyikan, menyamarkan asal usul harta kekayaan dan atau menyembunyikan atau menyamarkan asal usul, sumber, lokasi, peruntukan, pengalihan hak-hak atau kepemilikan yg sebenarnya atas harta kekayaan yang diketahuinya atau patut diduganya merupakan hasil TPK.
9. Perkara TPK atas nama terdakwa SUSI TUR ANDYANI sehubungan dengan turut serta atau membantu menerima hadiah atau janji oleh hakim berkaitan dengan penanganan perkara sengketa Pemilihan Kepala Daerah (Pilkada) Kabupaten Lebak, Propinsi Banten Tahun 2013 di Mahkamah Konstitusi Republik Indonesia, padahal diketahui atau patut diduga bahwa pembangunan/pengadaan/peningkatan sarana dan prasarana olahraga di Hambalang TA 2010 – 2012 yang dilakukan oleh Tersangka Andi Alifian Mallarangeng selaku Menteri Pemuda dan Olahraga/Pengguna Anggaran pada Kementerian Pemuda dan Olahraga dkk hadiah atau janji tersebut diberikan untuk mempengaruhi putusan perkara yang diserahkan kepadanya untuk diadili.
10. Perkara TPK atas nama terdakwa TUBAGUS CHAERI WARDANA CHASAN sehubungan dengan memberi sesuatu kepada hakim dengan maksud untuk mempengaruhi putusan perkara yang diserahkan kepadanya untuk diadili berkaitan dengan penanganan perkara sengketa Pemilihan Kepala Daerah (Pilkada) Kabupaten Lebak Propinsi Banten Tahun 2013 di Mahkamah Konstitusi Republik.

11. Perkara TPK atas nama terdakwa BUDI MULYA sehubungan dengan pemberian FPJP (Fasilitas Pendanaan Jangka Pendek) dan Penetapan Bank Century sebagai bank gagal berdampak sistemik.
12. Perkara TPK atas nama terdakwa ANDI ALIFIAN MALLARANGENG sehubungan dengan pembangunan/pengadaan/peningkatan sarana dan prasarana olahraga di Hambalang TA 2010-2012.
13. Perkara TPK atas nama terdakwa TEUKU BAGUS MOKHAMAD NOOR sehubungan dengan Proyek Pembangunan Pusat Pendidikan Pelatihan dan Sokelah Olahraga Nasional (P3SON) di Hambalang TA 2010 – 2012.
14. Perkara TPK atas nama terdakwa RATU ATUT CHOSIYAH sehubungan dengan memberi atau menjanjikan sesuatu kepada hakim dengan maksud untuk mempengaruhi putusan perkara yang diserahkan kepadanya untuk diadili berkaitan dengan penanganan perkara sengketa Pemilihan Kepala Daerah (Pilkada) Kabupaten Lebak, Propinsi Banten Tahun 2013 di Mahkamah Konstitusi Republik Indonesi.
15. Perkara TPK atas nama terdakwa ANAS URBANINGRUM sehubungan dengan menerima hadiah atau janji terkait dengan proses perencanaan dan pelaksanaan pembangunan proyek Pusat Pendidikan, Pelatihan dan Sekolah Olahraga Nasional (P3SON) di Desa Hambalang, Kecamatan Citeureup, Kabupaten Bogor, Provinsi Jawa Barat dan proyek-proyek lainnya.
16. Perkara TPPU atas nama terdakwa ANAS URBANINGRUM sehubungan dengan menempatkan, mentransfer, mengalihkan, membelanjakan, membayarkan, menghibahkan, menitipkan, membawa ke luar negeri, mengubah bentuk, menukarkan, dengan mata uang atau surat berharga atau perbuatan lain atas harta kekayaan yang diketahui atau patut diduganya merupakan hasil tindak pidana korupsi dengan tujuan menyembunyikan atau menyamarkan asal usul harta kekayaan dan atau menyembunyikan asal usul, sumber, lokasi, peruntukan, pengalihan hal-hak, atau kepemilikan yang sebenarnya atas harta kekayaan yang diketahui atau patut diduganya merupakan hasil tindak pidana korupsi.
17. Perkara TPK atas nama terdakwa SYAHRUL RAJA SEMPURNAJAYA sehubungan dengan memberi atau menjanjikan sesuatu kepada Pegawai Negeri atau Penyelenggara Negara, terkait dengan pemberian Rekomendasi Tukar Menukar Kawasan Hutan di Kabupaten Bogor atas nama PT Bukit Jonggol Asri.
18. Perkara TPK atas nama terdakwa SYAHRUL RAJA SEMPURNAJAYA sehubungan dengan penerimaan hadiah atau janji terkait penanganan perkara investasi di CV. Gold Aset/PT. Axo Capital Futures dan atau terkait jabatan Kepala Bappebti.
19. Perkara TPPU atas nama terdakwa SYAHRUL RAJA SEMPURNAJAYA sehubungan dengan perbuatan menempatkan, mentransfer, mengalihkan, membelanjakan, membayarkan, menghibahkan, menitipkan, membawa ke luar negeri, mengubah bentuk, menukarkan dengan mata uang atau surat berharga atau perbuatan lain atas harta kekayaan yang diketahui atau patut diduganya merupakan hasil tindak pidana dengan tujuan menyembunyikan atau

menyamarkan asal usul sumber, lokasi, peruntukkan, pengalihan hak-hak atau kepemilikan yang sebenarnya atas harta kekayaan yang diketahuinya atau patut diduganya merupakan hasil tindak pidana korupsi.

20. Perkara TPK atas nama terdakwa F.X. YOHAN YAP ALIAS YOHAN sehubungan dengan memberi atau menjanjikan sesuatu kepada Pegawai Negeri atau Penyelenggara Negara, terkait dengan pemberian Rekomendasi Tukar Menukar Kawasan Hutan di Kabupaten Bogor atas nama PT Bukit Jonggol Asri.
21. Perkara TPK atas nama terdakwa TAFSIR NURCHAMID sehubungan dengan pengadaan dan instalasi infrastruktur IT Gedung Perpustakaan Pusat Universitas Indonesia (UI) tahun 2010 – 2011.
22. Perkara TPK atas nama terdakwa HERU SULAKSONO sehubungan dengan pelaksanaan proyek pembangunan Dermaga Bongkar pada Kawasan Perdagangan Bebas dan Pelabuhan Bebas Sabang yang dibiayai Anggaran Pendapatan dan Belanja Negara (APBN) TA 2006 – 2011, yang dilakukan oleh tersangka selaku Kepala Cabang PT. Nindya Karya Cabang Sumatera Utara dan NAD merangkap kuasa Nindya Sejati JO (kerjasama antara PT. Nindya Karya dan PT.Tuah Sejati) dan kawan-kawan.
23. Perkara TPPU atas nama terdakwa HERU SULAKSONO sehubungan dengan perbuatan menempatkan, mentransfer, mengalihkan, membelanjakan, membayarkan, menghibahkan, menitipkan, mengubah bentuk, menukarkan dengan mata uang dan atau menyembunyikan/menyamarkan asal usul, sumber lokasi, kepemilikan harta kekayaan yang diketahui atau patut diduga merupakan hasil tindak pidana.
24. Perkara TPK atas nama terdakwa RAMLAN COMEL sehubungan dengan bersama-sama melakukan atau menyuruh melakukan atau turut serta melakukan terkait perbuatan Setya Budi Tejo Cahyono yaitu menerima pemberian atau janji terkait dengan penanganan perkara TPK mengenai penyimpangan dana bantuan sosial Pemerintah Kota Bandung TA 2009 – 2010 di Pengadilan Tindak Pidana Korupsi pada Pengadilan Negeri Bandung dan Pengadilan Tinggi Jawa Barat dengan terdakwa Rochman selaku mantan Bendahara Pengeluaran Sekretariat Daerah Kota Bandung dkk.
25. Perkara TPK atas nama terdakwa NY. PASTI SEREFINA SINAGA sehubungan dengan bersama-sama melakukan atau menyuruh melakukan atau turut serta melakukan terkait perbuatan Setya Budi Tejo Cahyono yaitu menerima pemberian atau janji terkait dengan penanganan perkara banding TPK mengenai penyimpangan dana bantuan sosial Pemerintah Kota Bandung TA 2009 – 2010 di Pengadilan Tindak Pidana Korupsi pada Pengadilan Negeri Bandung dan Pengadilan Tinggi Jawa Barat dengan terdakwa Rochman selaku mantan Bendahara Pengeluaran Sekretariat Daerah Kota Bandung dkk.
26. Perkara TPK atas nama terdakwa ROMI HERTON dan MASYITO sehubungan dengan memberi atau menjanjikan sesuatu kepada hakim dengan maksud untuk mempengaruhi putusan perkara yang diserahkan kepadanya untuk diadili terkait dengan sengketa pemilihan kepala

- daerah Kota Palembang di Mahkamah Konstitusi tahun 2013 dan dengan sengaja tidak memberikan keterangan atau memberikan keterangan yang tidak benar terkait dengan persidangan atas nama terdakwa M. Akil Mochtar di pengadilan tindak pidana korupsi Jakarta.
27. Perkara TPK atas nama terdakwa MUHTAR EPENDY sehubungan dengan sengaja mencegah, merintangi atau menggagalkan secara langsung maupun tidak langsung penyidikan, penuntutan, dan pemeriksaan di sidang pengadilan terhadap tersangka atau terdakwa ataupun para saksi dalam perkara korupsi, dan dengan sengaja tidak memberi keterangan atau memberi keterangan yang tidak benar pada persidangan atas nama M. Akil Mochtar di Pengadilan Tindak Pidana Korupsi Jakarta.
28. Perkara TPK atas nama terdakwa MAMAK JAMAKSARI sehubungan dengan pengadaan alat kesehatan Kedokteran Umum Puskesmas Kota Tangerang Selatan APBDP Tahun Anggaran 2012.
29. Perkara TPK atas nama terdakwa DIDIK PURNOMO sehubungan dengan pengadaan driving simulator roda dua (R 2) dan roda empat (R 4) pada Korps Lalu Lintas Mabes Polri TA. 2011.
30. Perkara TPK atas nama terdakwa ADE SWARA dan NURLATIFAH sehubungan dengan pegawai negeri/penyelenggara negara yang dengan maksud menguntungkan diri sendiri atau orang lain secara melawan hukum atau dengan menyalahgunakan kekuasaannya memaksa seseorang memberikan sesuatu terkait pengurusan izin Surat Persetujuan Pemanfaatan Ruang (SPPR) atas nama PT. Tatar Kertabumi di Kabupaten Karawang.
31. Perkara TPPU atas nama terdakwa ADE SWARA dan NURLATIFAH sehubungan dengan perbuatan menempatkan, mentransfer, mengalihkan, membelanjakan, membayarkan, menghibahkan, menitipkan, membawa ke luar negeri, mengubah bentuk, menukarkan dengan mata uang atau surat berharga atau perbuatan lain atas Harta Kekayaan yang diketahui atau patut diduga merupakan hasil tindak pidana korupsi dengan tujuan menyembunyikan atau menyamarkan asal usul Harta Kekayaan.
32. Perkara TPK atas nama terdakwa GULAT MEDALI EMAS MANURUNG sehubungan dengan memberi atau menjanjikan sesuatu kepada pegawai negeri atau penyelenggara negara dengan maksud supaya pegawai negeri atau penyelenggara negara tersebut berbuat atau tidak berbuat sesuatu dalam jabatannya, yang bertentangan dengan kewajibannya terkait dengan Pengajuan Revisi Alih Fungsi Hutan di Provinsi Riau Tahun 2014 kepada Kementerian Kehutanan.
33. Perkara TPK atas nama terdakwa MACHFUD SUROSO sehubungan dengan Proyek Pembangunan Pusat Pendidikan Pelatihan dan Sekolah Olahraga Nasional (P3SON) di Hambalang TA 2010 – 2012.
34. Perkara TPK atas nama terdakwa ANNAS MAAMUN sehubungan dengan pegawai negeri atau penyelenggara negara yang menerima pemberian atau janji dengan maksud supaya pegawai negeri atau penyelenggara negara tersebut berbuat atau tidak berbuat sesuatu dalam jabatannya, yang bertentangan dengan kewajibannya terkait dengan Pengajuan Revisi Alih Fungsi Hutan di Propinsi Riau Tahun 2014 kepada kementerian Kehutanan.

35. Perkara TPK atas nama terdakwa KWEE CAHYADI KUMALA ALS SWIE TENG sehubungan dengan memberi atau menjanjikan sesuatu kepada Pegawai Negeri atau Penyelenggara Negara terkait pemberian Rekomendasi Tukar Menukar Kawasan Hutan di Kabupaten Bogor atas nama PT Bukit Jonggol Asri dan dengan sengaja mencegah, merintangi, atau menggagalkan secara langsung atau tidak langsung penyidikan, penuntutan, dan pemeriksaan di sidang pengadilan terhadap tersangka dan terdakwa ataupun para saksi dalam perkara korupsi.
36. Perkara TPK atas nama terdakwa RAJA BONARAN SITUMEANG sehubungan dengan memberi atau menjanjikan sesuatu kepada M. Akil Mochtar selaku Hakim Konstitusi dengan maksud untuk mempengaruhi putusan perkara sengketa Pemilihan Kepala Daerah (Pilkada) Kabupaten Tapanuli Tengah Tahun 2011 yang diserahkan kepadanya untuk diadili.
37. Perkara TPK atas nama terdakwa IR. A. BAMBANG D sehubungan dengan memberi hadiah atau janji terkait dengan jual beli gas alam untuk pembangkit listrik di Gresik dan Gili Timur Bangkalan Madura, Jawa Timur dan proyek-proyek lainnya yang dilakukan oleh tersangka selaku Direktur Human Resource Development PT Media Karya Sentosa bersama dengan kawan-kawan.

---

**Share :**

Bagikan 0

Tweet

## PENINDAKAN

Penyidikan (/id/berkas/penindakan/penyidikan)

Penuntutan (/id/berkas/penindakan/penuntutan)

Inkracht (/id/berkas/penindakan/inkracht)

Jejak Kasus (/id/jejak-kasus)

























## LINK

[TENTANG ACCH \(/ID/TENTANG-ACCH\).](#)

[DISCLAIMER \(/ID/DISCLAIMER\).](#)

[KETENTUAN \(/ID/KETENTUAN\).](#)

[SITEMAP \(/ID/SITEMAP\).](#)

## REDAKSI ACCH

KOMISI PEMBERANTASAN KORUPSI  
JL. KUNINGAN PERSADA KAV. 4 JAKARTA 12950  
TELP: (021) 2557 8300 EXT. 8642  
EMAIL: [ACCH@KPK.GO.ID](mailto:ACCH@KPK.GO.ID)  
([MAILTO:ACCH@KPK.GO.ID](mailto:ACCH@KPK.GO.ID)).

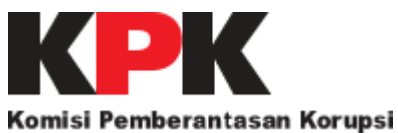

([HTTPS://WWW.KPK.GO.ID/](https://www.kpk.go.id/))
