# Supplementary material for: Democratization, leader education and growth: firm-level evidence from Indonesia
Source: Springer Nature journal article supplement (doi:10.1007/s10887-022-09221-5), 2023-02-15
Supplement: MOESM2 [file Penuntutan 2016.pdf › Data/Mayor-level corruption dataset (incl sources)/KPK Penuntutan 2011-/Penuntutan 2016.pdf]

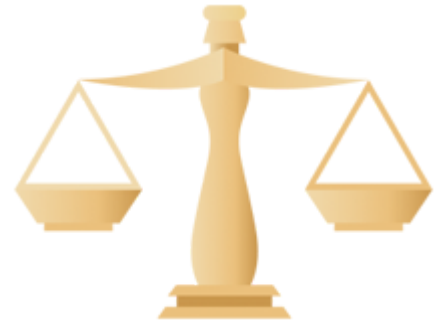

# PENINDAKAN

Menyajikan informasi perkembangan penanganan tindak pidana korupsi yang dilakukan oleh Komisi Pemberantasan Korupsi.

[Beranda \(/id/\)](#) / [Berkas](#) / [PENINDAKAN](#) / [Penuntutan \(/id/berkas/penindakan/penuntutan\)](#) / [Penuntutan 2016](#)

## PENUNTUTAN

### Penuntutan 2016

Ditulis oleh admin.acch. Diposting di [Penuntutan \(/id/berkas/penindakan/penuntutan\)](#). Dilihat: 5249

#### Desember

1. Perkara TPK atas nama terdakwa AMRAN HI MUSTARY sehubungan dengan menerima hadiah atau janji dari Abdul Khoir guna mengupayakan Usulan Program Pembangunan Infrastruktur pada Kementerian Pekerjaan Umum dan Perumahan Rakyat di Maluku atau Maluku Utara serta menunjuk Abdul Khoir dan kawan-kawan sebagai pelaksananya.
2. Perkara TPK atas nama terdakwa YAN ANTON FERDIAN sehubungan dengan secara bersama-sama menerima hadiah atau janji terkait dengan proses perencanaan, penganggaran dan pelaksanaan proyek pengadaan barang dan jasa di Dinas Pendidikan dan dinas-dinas lainnya di lingkungan Pemerintah Kabupaten Banyuasin.
3. Perkara TPK atas nama terdakwa RUSTAMI sehubungan dengan secara bersama-sama pegawai negeri atau penyelenggara negara menerima hadiah atau janji terkait dengan proses perencanaan, penganggaran dan pelaksanaan proyek pengadaan barang dan jasa di Dinas Pendidikan dan dinas-dinas lainnya di lingkungan Pemerintah Kabupaten Banyuasin.

4. Perkara TPK atas nama terdakwa KIRMAN sehubungan dengan secara bersama-sama pegawai negeri atau penyelenggara negara menerima hadiah atau janji terkait dengan proses perencanaan, penganggaran dan pelaksanaan proyek pengadaan barang dan jasa di Dinas Pendidikan dan dinas-dinas lainnya di lingkungan Pemerintah Kabupaten Banyuasin.
  5. Perkara TPK atas nama terdakwa UMAR USMAN sehubungan dengan secara bersama-sama pegawai negeri atau penyelenggara negara menerima hadiah atau janji terkait dengan proses perencanaan, penganggaran dan pelaksanaan proyek pengadaan barang dan jasa di Dinas Pendidikan dan dinas-dinas lainnya di lingkungan Pemerintah Kabupaten Banyuasin.
  6. Perkara TPK atas nama terdakwa SUTARYO sehubungan dengan secara bersama-sama pegawai negeri atau penyelenggara negara menerima hadiah atau janji terkait dengan proses perencanaan, penganggaran dan pelaksanaan proyek pengadaan barang dan jasa di Dinas Pendidikan dan dinas-dinas lainnya di lingkungan Pemerintah Kabupaten Banyuasin.
- 

## **November**

1. Perkara TPK atas nama terdakwa ZULFIKAR MUHARRAMI sehubungan dengan pemberian hadiah atau janji terkait dengan proses perencanaan, penganggaran dan pelaksanaan proyek pengadaan barang dan jasa di Dinas Pendidikan dan dinas-dinas lainnya di lingkungan Pemerintah Kabupaten Banyuasin.
- 

## **Oktober**

1. Perkara TPK atas nama terdakwa BUDIMAN PARDAMEAN NADAPDAP sehubungan dengan menerima hadiah atau janji dari Gatot Pujo Nugroho selaku Gubernur Provinsi Sumatera Utara terkait fungsi dan kewenangan tersangka selaku anggota DPRD Provinsi Sumatera Utara Periode 2009 – 2014 dan periode 2014 – 2019.
2. Perkara TPK atas nama terdakwa GUNTUR MANURUNG sehubungan dengan menerima hadiah atau janji dari Gatot Pujo Nugroho selaku Gubernur Provinsi Sumatera Utara terkait fungsi dan kewenangan tersangka selaku anggota DPRD Provinsi Sumatera Utara Periode 2009 – 2014 dan periode 2014 – 2019.
3. Perkara TPK atas nama terdakwa MUHAMMAD AFAN sehubungan dengan menerima hadiah atau janji dari Gatot Pujo Nugroho selaku Gubernur Provinsi Sumatera Utara terkait fungsi dan kewenangan tersangka selaku anggota DPRD Provinsi Sumatera Utara Periode 2009 – 2014 dan periode 2014 – 2019.
4. Perkara TPK atas nama terdakwa BUSTAMI H. S. sehubungan dengan menerima hadiah atau janji dari Gatot Pujo Nugroho selaku Gubernur Provinsi Sumatera Utara terkait fungsi dan kewenangan tersangka selaku anggota DPRD Provinsi Sumatera Utara Periode 2009 – 2014 dan periode 2014 – 2019.

5. Perkara TPK atas nama terdakwa H. M. JOHAR dan SUPARMAN sehubungan dengan pegawai negeri atau penyelenggara negara yang bersama-sama menerima hadiah atau janji dengan maksud supaya pegawai negeri atau penyelenggara negara tersebut berbuat atau tidak berbuat sesuatu dalam jabatannya, yang bertentangan dengan kewajibannya terkait dengan Pembahasan RAPBD-P TA 2014 dan/atau RAPBD TA 2015 pada Provinsi Riau.
6. Perkara TPK atas nama terdakwa GATOT PUJO N sehubungan dengan memberi hadiah atau janji kepada anggota DPRD Provinsi Sumatera Utara periode 2009 s.d. 2014 dan 2014 s.d. 2019 terkait dengan: 1. Persetujuan laporan pertanggungjawaban Pemerintah Provinsi Sumatera Utara tahun anggaran 2012 s.d. 2014 oleh DPRD Provinsi Sumatera Utara; 2. Persetujuan perubahan anggaran pendapatan dan belanja daerah provinsi sumatera utara tahun anggaran 2013 dan 2014 oleh DPRD provinsi sumatera utara; 3. Pengesahan anggaran pendapatan dan belanja daerah provinsi sumatera utara tahun anggaran 2014 dan 2015 oleh DPRD provinsi sumatera utara; dan 4. Penolakan penggunaan hak interpelasi oleh DPRD provinsi sumatera utara pada tahun 2015.
7. Perkara TPK atas nama terdakwa ARIS HADIANTO sehubungan dengan memberi hadiah atau janji kepada pejabat di PT. Berdikari (Persero) terkait dengan pengadaan atau pembelian pupuk di PT. Berdikari (Persero).
8. Perkara TPK atas nama terdakwa MUHAMMAD SANTOSO sehubungan dengan Perkara TPK secara bersama-sama memberi atau menjanjikan sesuatu kepada penyelenggara negara dengan maksud supaya penyelenggaran negara tersebut berbuat atau tidak berbuat sesuatu dalam jabatannya yang bertentangan dengan kewajibannya terkait dengan putusan perkara perdata nomor: 503/PDT.G/2015/PN.JKT.PST antara PT. Mitra Maju Sukses (PT MMS) selaku penggugat dengan PT. Kapuas Tunggal Persada (PT. KTP) selaku tergugat di pengadilan negeri jakarta pusat.
9. Perkara TPK atas nama terdakwa SRI ASTUTI sehubungan dengan memberi hadiah atau janji kepada Pejabat di PT. Berdikari (Persero) terkait dengan pengadaan atau pembelian pupuk di PT. Berdikari (Persero).
10. Perkara TPK atas nama terdakwa I PUTU SUDIARTANA sehubungan dengan bersama-sama dengan Noviyanti dan Suhemi, yaitu menerima hadiah atau janji dari Yogan Askan dan Suprpto terkait dengan pengurusan anggaran di DPR untuk alokasi Provinsi Sumatera Barat Pada APBN-P tahun 2016.  
Perkara TPK atas nama terdakwa XAVERIANDY SUTANTO dan MEMI sehubungan dengan setiap orang yang memberi atau menjanjikan sesuatu kepada penyelenggara dengan maksud supaya penyelenggara negara tersebut berbuat atau tidak berbuat sesuatu dalam jabatannya yang bertentangan dengan kewajibannya terkait dengan pengurusan perkara nomor: 520/Pidsus/2016/PN.PDG Tanggal 2 Agustus 2016 di Pengadilan Negeri Padang.
11. Perkara TPK atas nama terdakwa IRMAN GUSMAN sehubungan dengan penyelenggara negara yang menerima hadiah atau janji padahal diketahui atau patut diduga bahwa hadiah atau janji

tersebut diberikan untuk menggerakkan agar melakukan atau tidak melakukan sesuatu atau tidak berbuat sesuatu dalam jabatannya yang bertentangan dengan kewajibannya terkait dengan pengurusan kuota gula impor yang diberikan oleh Bulog kepada CV Semesta Berjaya di tahun 2016.

---

## September

1. Perkara TPK atas nama terdakwa EDY SANTONI dan SAFRI sehubungan dengan memberi atau menjanjikan sesuatu berupa uang kepada Majelis Hakim Pengadilan Tipikor Bengkulu.
2. Perkara TPK atas nama terdakwa JANNER PURBA dan TOTON sehubungan dengan bersama-sama dengan Toton selaku anggota Majelis Hakim Pengadilan Tipikor Bengkulu yaitu menerima pemberian hadiah atau janji sehubungan dengan perkara TPK terkait penyalahgunaan honor Dewan Pembina RSUD M.Yunus Bengkulu Tahun Anggaran 2011 yang sedang disidangkan di Pengadilan Tipikor Bengkulu atas nama terdakwa Edy Santoni dan terdakwa Safri.
3. Perkara TPK atas nama terdakwa BADARUDDIN BACHSIN sehubungan dengan menerima pemberian hadiah atau janji sehubungan dengan perkara TPK terkait penyalahgunaan honor Dewan Pembina RSUD M.Yunus Bengkulu Tahun Anggaran 2011 yang sedang disidangkan di Pengadilan Tipikor Bengkulu atas nama terdakwa Edy Santoni dan terdakwa Safri.
4. Perkara TPK atas nama terdakwa AHMAD YANI sehubungan dengan secara bersama-sama memberi atau menjanjikan sesuatu kepada penyelenggara negara dengan maksud supaya penyelenggaraan negara tersebut berbuat atau tidak berbuat sesuatu dalam jabatannya yang bertentangan dengan kewajibannya terkait dengan putusan perkara perdata nomor: 503/PDT.G/2015/PN.JKT.PST antara PT. Mitra Maju Sukses (PT MMS) selaku penggugat dengan PT. Kapuas Tunggal Persada (PT. KTP) selaku tergugat di pengadilan negeri jakarta pusat.
5. Perkara TPK atas nama terdakwa EDISON MARUDUT MARDASAULI SIAHAAN sehubungan dengan memberi atau menjanjikan sesuatu kepada pegawai negeri atau penyelenggara negara dengan maksud supaya pegawai negeri atau penyelenggara negara tersebut berbuat atau tidak berbuat sesuatu dalam jabatannya, yang bertentangan dengan kewajibannya terkait dengan pengajuan revisi alih fungsi hutan di provinsi Riau tahun 2014 kepada kementerian kehutanan.
6. Perkara TPK atas nama terdakwa RAOUL ADHITYA WIRANATAKUSUMAH sehubungan dengan secara bersama-sama memberi atau menjanjikan sesuatu kepada penyelenggara negara dengan maksud supaya penyelenggaraan negara tersebut berbuat atau tidak berbuat sesuatu dalam jabatannya yang bertentangan dengan kewajibannya terkait dengan putusan perkara perdata nomor: 503/PDT.G/2015/PN.JKT.PST antara PT. Mitra Maju Sukses (PT MMS) selaku penggugat dengan PT. Kapuas Tunggal Persada (PT. KTP) selaku tergugat di pengadilan negeri jakarta pusat.

7. Perkara TPK atas nama terdakwa NOVIYANTI dan SUHEMI sehubungan dengan bersama-sama dengan I Putu Sudiartana selaku anggota DPR RI yaitu menerima hadiah atau janji dari Yogan Askan dan Suprpto terkait dengan pengurusan anggaran di DPR untuk alokasi Provinsi Sumatera Barat Pada APBN-P tahun 2016.
  8. Perkara TPK atas nama terdakwa ZULKIFLI EFFENDI SIREGAR sehubungan dengan menerima hadiah atau janji dari Gatot Pujo Nugroho selaku Gubernur Provinsi Sumatera Utara terkait fungsi dan kewenangan tersangka selaku anggota DPRD Provinsi Sumatera Utara Periode 2009 – 2014 dan periode 2014 – 2019.
  9. Perkara TPK atas nama terdakwa PARLUHUTAN SIREGAR sehubungan dengan menerima hadiah atau janji dari Gatot Pujo Nugroho selaku Gubernur Provinsi Sumatera Utara terkait fungsi dan kewenangan tersangka selaku anggota DPRD Provinsi Sumatera Utara Periode 2009 – 2014 dan periode 2014 – 2019.
  10. Perkara TPK atas nama terdakwa ZULKIFLI HUSEIN sehubungan dengan menerima hadiah atau janji dari Gatot Pujo Nugroho selaku Gubernur Provinsi Sumatera Utara terkait fungsi dan kewenangan tersangka selaku anggota DPRD Provinsi Sumatera Utara Periode 2009 – 2014 dan periode 2014 – 2019.
  11. Perkara TPK atas nama terdakwa BUDIANTO HALIM WIDJAJA sehubungan dengan memberi hadiah atau janji kepada Pejabat di PT. Berdikari (Persero) terkait dengan pengadaan atau pembelian pupuk di PT. Berdikari (Persero).
- 

## **Agustus**

1. Perkara TPK atas nama terdakwa FAHRI NURMALLO dan DEVIYANTI ROCHAENI sehubungan dengan menerima hadiah atau janji terkait dengan penanganan perkara TPK Penyalahgunaan Anggaran dalam Pengelolaan Dana Kapitasi pada Program Jaminan Kesehatan Nasional di Dinas Kesehatan Kabupaten Subang Tahun Anggaran 2014.
2. Perkara TPK atas nama terdakwa OJANG SOHANDI sehubungan dengan bersama-sama dengan Jajang Abdul Holik dan Lenih Marliani yaitu memberi hadiah atau janji kepada Fahri Nurmallo dan Deviyanti Rochaeni yang masing-masing sebagai Jaksa Penuntut Umum pada Kejaksaan Tinggi Jawa Barat, terkait penanganan perkara TPK Penyalahgunaan Anggaran dalam Pengelolaan Dana Kapitasi pada Program Jaminan Kesehatan Nasional di Dinas Kesehatan Kabupaten Subang Tahun Anggaran 2014.
3. Perkara TPK atas nama terdakwa OJANG SOHANDI sehubungan dengan menerima gratifikasi yang berhubungan dengan jabatannya dan yang berlawanan dengan kewajiban atau tugasnya.
4. Perkara TPPU atas nama terdakwa OJANG SOHANDI sehubungan dengan perbuatan menempatkan, mentransfer, mengalihkan, membelanjakan, membayarkan, menghibahkan, menitipkan, membawa ke luar negeri, mengubah bentuk, menukarkan dengan mata uang atau

surat berharga atau perbuatan lain atas harta kekayaan yang diketahuinya atau patut diduganya merupakan hasil tindak pidana.

5. Perkara TPK atas nama terdakwa BERTHANATALIA RURUK KARIMAN dan SAMSUL HIDAYATULLAH sehubungan dengan bersama-sama dengan Kasman Sangaji dalam memberi atau menjanjikan sesuatu kepada pegawai negeri atau penyelenggara negara untuk pengurusan perkara Nomor: 454/Pidsus/2016/PN.JKT.UTR pada Pengadilan Negeri Jakarta Utara.
6. Perkara TPK atas nama terdakwa KASMAN SANGAJI sehubungan dengan bersama-sama dengan Berthanatalia Ruruk Kariman dan Samsul Hidayatullah dalam memberi atau menjanjikan sesuatu kepada pegawai negeri atau penyelenggara negara untuk pengurusan perkara Nomor: 454/Pidsus/2016/PN.JKT.UTR pada Pengadilan Negeri Jakarta Utara.
7. Perkara TPK atas nama terdakwa SITI MARWA sehubungan dengan menerima hadiah terkait dengan pengadaan atau pembelian pupuk di PT. Berdikari (Persero).
8. Perkara TPK atas nama terdakwa EDY NASUTION sehubungan dengan menerima hadiah atau janji padahal diketahui atau patut diduga bahwa hadiah atau janji tersebut diberikan untuk menggerakkan agar melakukan sesuatu dalam jabatannya atau karena diketahui telah melakukan sesuatu dalam jabatannya yang bertentangan dengan kewajibannya.
9. Perkara TPK atas nama terdakwa ROHADI sehubungan dengan menerima hadiah atau janji dari Syaiful Jamil melalui Kasman Sangaji, Berthanatalia Ruruk Kariman dan Samsul Hidayatullah dengan maksud untuk pengurusan perkara nomor: 454/Pidsus/2016/PN.JKT.UTR pada Pengadilan Negeri Jakarta Utara.
10. Perkara TPK atas nama terdakwa YOGAN ASKAN sehubungan dengan memberi atau menjanjikan sesuatu kepada I Putu Sudiartana selaku anggota DPR RI bersama-sama dengan Noviyanti dan Suhemi, terkait dengan pengurusan anggaran di DPR untuk alokasi Provinsi Sumatera Barat Pada APBN-P tahun 2016.
11. Perkara TPK atas nama terdakwa SUPRAPTO sehubungan dengan bersama-sama dengan Yogan Askan memberi atau menjanjikan sesuatu kepada I Putu Sudiartana selaku anggota DPR RI bersama-sama dengan Noviyanti dan Suhemi, terkait dengan pengurusan anggaran di DPR untuk alokasi Provinsi Sumatera Barat Pada APBN-P tahun 2016.

---

## Juli

1. Perkara TPK atas nama terdakwa BUDI SUPRIYANTO sehubungan dengan menerima hadiah atau janji dari Abdul Khoir terkait dengan pekerjaan di Kementerian Pekerjaan Umum dan Perumahan Rakyat Tahun Anggaran 2016.
2. Perkara TPK atas nama terdakwa MOHAMAD SANUSI sehubungan dengan menerima sesuatu hadiah atau janji secara berlanjut terkait dengan pembahasan Rancangan Peraturan Daerah tentang Rencana Zonasi Wilayah Pesisir dan Pulau Pulau kecil Provinsi DKI Jakarta Tahun 2015

- 2035 dan Rancangan Peraturan Daerah tentang Rencana Tata Ruang Kawasan Strategis Pantai Utara Jakarta.
3. Perkara TPPU atas nama tersangka MOHAMAD SANUSI sehubungan dengan perbuatan menempatkan, mentransfer, mengalihkan, membelanjakan, membayarkan, menghibahkan, menitipkan, membawa ke luar negeri, mengubah bentuk, menukarkan dengan mata uang atau surat berharga atau perbuatan lain atas harta kekayaan yang diketahuinya atau patut diduganya merupakan hasil tindak pidana.
- 

## **Juni**

1. Perkara TPK atas nama terdakwa ANDRI TRISTIANTO SUTRISNA sehubungan dengan menerima hadiah atau janji terkait pengiriman putusan kasasi perkara korupsi Pekerjaan Pembangunan Dermaga Labuhan Haji, Kabupaten Lombok Timur di Mahkamah Agung RI.
  2. Perkara TPK atas nama terdakwa JAJANG ABDUL HOLIK dan LENIH MARLIANI sehubungan dengan bersama-sama dengan Ojang Sohandi yaitu memberi hadiah atau janji kepada Fahri Nurmallo dan Deviyanti Rochaeni yang masing-masing sebagai Jaksa Penuntut Umum pada Kejaksaan Tinggi Jawa Barat, terkait penanganan perkara TPK Penyalahgunaan Anggaran dalam Pengelolaan Dana Kapitasi pada Program Jaminan Kesehatan Nasional di Dinas Kesehatan Kabupaten Subang Tahun Anggaran 2014.
  3. Perkara TPK atas nama terdakwa UJANG M. AMIN, JAINI, PARLINDUNGAN HARAHAHAP, DEPY IRAWAN, DEAR FAUZUL AZIM, dan IIN FEBRIANTO sehubungan dengan menerima hadiah atau janji terkait dengan persetujuan Laporan Keterangan Pertanggungjawaban (LKPJ) Kepala Daerah Musi Banyuasin Tahun Anggaran 2014 dan Pengesahan Anggaran Pendapatan dan Belanja Daerah (APBD) Kabupaten Musi Banyuasin Tahun Anggaran 2015.
  4. Perkara TPK atas nama terdakwa DODDY ARYANTO SUPENO sehubungan dengan memberi hadiah atau janji kepada pegawai negeri atau penyelenggara negara terkait dengan pengurusan perkara di Pengadilan Negeri Jakarta Pusat dengan maksud supaya pegawai negeri atau penyelenggara negara tersebut berbuat atau tidak berbuat sesuatu dalam jabatannya atau karena berhubungan dengan suatu perbuatan yang berhubungan dengan jabatannya yang bertentangan dengan kewajibannya.
- 

## **Mei**

1. Perkara TPK atas nama terdakwa DAMAYANTI WISNU PUTRANTI sehubungan dengan menerima hadiah atau janji dari ABDUL KHOIR selaku Direktur Utama PT. Windu Tunggal Utama terkait untuk mendapatkan pekerjaan di Kementerian Pekerjaan Umum dan Perumahan Rakyat Tahun Anggaran 2016.

2. Perkara TPK atas nama terdakwa JULIA PRASETYARINI sehubungan dengan turut serta atau bersama-sama dengan DAMAYANTI WISNU PUTRANTI dan DESSY A EDWIN selaku anggota Komisi V DPR RI dalam menerima hadiah atau janji dari ABDUL KHOIR selaku Direktur Utama PT. Windu Tunggal Utama terkait untuk mendapatkan pekerjaan di Kementerian Pekerjaan Umum dan Perumahan Rakyat Tahun Anggaran 2016.
  3. Perkara TPK atas nama terdakwa DESSY A EDWIN sehubungan dengan turut serta atau bersama-sama dengan DAMAYANTI WISNU PUTRANTI dan JULIA PRASETYANI selaku anggota Komisi V DPR RI dalam menerima hadiah atau janji dari ABDUL KHOIR selaku Direktur Utama PT. Windu Tunggal Utama terkait untuk mendapatkan pekerjaan di Kementerian Pekerjaan Umum dan Perumahan Rakyat Tahun Anggaran 2016.
  4. Perkara TPK atas nama terdakwa SUKOTJO S BAMBANG sehubungan dengan pengadaan Driving Simulator Roda Dua (R2) dan Roda Empat (R4) pada Korps Lalu Lintas Mabes Polri TA 2011.
  5. Perkara TPK atas nama terdakwa TRINANDA PRIHANTORO sehubungan dengan memberi sesuatu hadiah atau janji secara berlanjut kepada Mohamad Sanusi selaku Anggota DPRD Provinsi DKI Jakarta periode 2014 – 2019 terkait dengan pembahasan Rancangan Peraturan Daerah tentang Rencana Zonasi Wilayah Pesisir dan Pulau Pulau kecil Provinsi DKI Jakarta Tahun 2015 – 2035 dan Rancangan Peraturan Daerah tentang Rencana Tata Ruang Kawasan Strategis Pantai Utara Jakarta.
  6. Perkara TPK atas nama terdakwa MARUDUT sehubungan dengan secara bersama-sama memberi atau mencoba memberi sesuatu kepada Kepala Kejaksaan Tinggi dan atau Asisten Tindak Pidana Khusus Kejaksaan Tinggi DKI guna menghentikan penyelidikan/penyidikan Tindak Pidana Korupsi pada PT. Brantas Abipraya di Kejaksaan Tinggi DKI Jakarta.
  7. Perkara TPK atas nama terdakwa DANDUNG PAMULAMO dan SUDI WANTOKO sehubungan dengan secara bersama-sama memberi atau mencoba memberi sesuatu kepada Kepala Tinggi dan atau Asisten Tindak Pidana Khusus Kejaksaan Tinggi DKI Jakarta guna menghentikan penyelidikan/penyidikan TPK pada PT. Brantas Abipraya di Kejaksaan Tinggi DKI Jakarta.
- 

## **April**

1. Perkara TPK atas nama terdakwa ICHSAN SUAIDI dan AWANG LAZUARDI EMBAT sehubungan dengan memberi hadiah atau janji kepada Andri Trisianto Sutrisna selaku Kasubdit Kasasi Perdata pada Direktorat Pranata dan Tatalaksana Perkara Perdata Mahkamah Agung RI, terkait Penundaan Pengiriman Putusan Kasasi Perkara Korupsi Pekerjaan Pembangunan Dermaga Labuhan Haji Kabupaten Lombok Timur oleh Mahkamah Agung RI.
2. Perkara TPK atas nama terdakwa BOBBY REYNOLD MAMAHIT sehubungan dengan pengadaan dan pelaksanaan Pembangunan Balai Pendidikan dan Pelatihan Ilmu Pelayaran (BP2IP)



## **Maret**

1. Perkara TPK atas nama terdakwa MUHAMMAD SYAKIR sehubungan dengan menjanjikan atau memberikan sesuatu kepada Penyelenggara Negara terkait dengan pengadaan Tethra Ethyl Lead (TEL) untuk kebutuhan kilang-kilang PT. Pertamina (Persero) tahun 2004-2005.
2. Perkara TPK atas nama terdakwa SIGIT PRAMONO ASRI sehubungan dengan menerima hadiah atau janji dari Gatot Pujo Nugroho selaku Gubernur Provinsi Sumatera Utara terkait dengan 1. Persetujuan Laporan Pertanggungjawaban Pemerintah Provinsi Sumatera Utara Tahun Anggaran 2012 oleh DPRD Provinsi Sumatera Utara; 2. Persetujuan Perubahan Anggaran Pendapatan dan Belanja Daerah Provinsi Sumatera Utara tahun anggaran 2013 oleh DPRD Provinsi Sumatera Utara; 3. Pengesahan Anggaran Pendapatan dan Belanja Daerah Provinsi Sumatera Utara tahun anggaran 2014 oleh DPRD Provinsi Sumatera Utara; dan 4. Pengesahan Anggaran Pendapatan dan Belanja Daerah Provinsi Sumatera Utara tahun anggaran 2015 oleh DPRD Provinsi Sumatera Utara.
3. Perkara TPK atas nama terdakwa AJIB SHAH sehubungan dengan secara bersama-sama dengan cara menerima hadiah atau janji dari Gatot Pujo Nugroho selaku Gubernur Propinsi Sumatera Utara terkait dengan 1. Persetujuan Laporan Pertanggungjawaban Pemerintah Provinsi Sumatera Utara Tahun Anggaran 2012 oleh DPRD Provinsi Sumatera Utara; 2. Persetujuan Perubahan Anggaran Pendapatan dan belanja Daerah Provinsi Sumatera Utara Tahun Anggaran 2013 oleh DPRD Provinsi Sumatera Utara; 3. Pengesahan Anggaran Pendapatan dan Belanja Daerah Provinsi Sumatera Utara Tahun Anggaran 2014 oleh DPRD Provinsi Sumatera Utara; 4. Pengesahan Anggaran Pendapatan dan Belanja Daerah Provinsi Sumatera Utara Tahun Anggaran 2015 oleh DPRD Provinsi Sumatera Utara; 5. Persetujuan Laporan Pertanggungjawaban Pemerintah Provinsi Sumatera Utara Tahun Anggaran 2014 oleh DPRD Provinsi Sumatera Utara; dan 6. Penolakan Penggunaan Hak Interpelasi oleh DPRD Provinsi Sumatera Utara pada tahun 2015.
4. Perkara TPK atas nama terdakwa SALEH BANGUN sehubungan dengan secara bersama-sama dengan cara menerima hadiah atau janji dari Gatot Pujo Nugroho selaku Gubernur Provinsi Sumatera Utara terkait dengan 1. Persetujuan Laporan Pertanggungjawaban Pemerintah Provinsi Sumatera Utara Tahun Anggaran 2012 oleh DPRD Provinsi Sumatera Utara; 2. Persetujuan Perubahan Anggaran Pendapatan dan belanja Daerah Provinsi Sumatera Utara Tahun Anggaran 2013 oleh DPRD Provinsi Sumatera Utara; 3. Pengesahan Anggaran Pendapatan dan Belanja Daerah Provinsi Sumatera Utara Tahun Anggaran 2014 oleh DPRD Provinsi Sumatera Utara; 4. Pengesahan Anggaran Pendapatan dan Belanja Daerah Provinsi Sumatera Utara Tahun Anggaran 2015 oleh DPRD Provinsi Sumatera Utara; 5. Persetujuan

Laporan Pertanggungjawaban Pemerintah Provinsi Sumatera Utara Tahun Anggaran 2014 oleh DPRD Provinsi Sumatera Utara; dan 6. Penolakan Penggunaan Hak Interpelasi oleh DPRD Provinsi Sumatera Utara pada tahun 2015.

5. Perkara TPK atas nama terdakwa CHAIDIR RITONGA sehubungan dengan menerima hadiah atau janji dari Gatot Pujo Nugroho selaku Gubernur Sumatera Utara terkait dengan : 1. Persetujuan Laporan Pertanggungjawaban Pemerintah Provinsi Sumatera Utara Tahun Anggaran 2012 oleh DPRD Provinsi Sumatera Utara; 2. Persetujuan Perubahan Anggaran Pendapatan dan Belanja Daerah Provinsi Sumatera Utara Tahun Anggaran 2013 oleh DPRD Provinsi Sumatera Utara; 3. Pengesahan Anggaran Pendapatan dan Belanja Daerah Provinsi Sumatera Utara Tahun Anggaran 2014 oleh DPRD Provinsi Sumatera Utara; 4. Pengesahan Anggaran Pendapatan dan Belanja Daerah Provinsi Sumatera Utara Tahun Anggaran 2015 oleh DPRD Provinsi Sumatera Utara; 5. Persetujuan Laporan Pertanggungjawaban Pemerintah Provinsi Sumatera Utara Tahun Anggaran 2014 oleh DPRD Provinsi Sumatera Utara; dan 6. Penolakan Penggunaan Hak Interpelasi oleh DPRD Provinsi Sumatera Utara pada tahun 2015.
6. Perkara TPK atas nama terdakwa ABDUL KHOIR sehubungan dengan memberikan atau menjanjikan sesuatu kepada pegawai negeri atau penyelenggara negara dengan maksud untuk mendapatkan pekerjaan di Kementerian Pekerjaan Umum dan Perumahan Rakyat Tahun Anggaran 2016.
7. Perkara TPK atas nama terdakwa FL. TRI SATRIYA SANTOSA sehubungan dengan pegawai negeri atau penyelenggara negara yang bersama-sama menerima pemberian atau janji dengan maksud supaya pegawai negeri atau penyelenggara negara tersebut berbuat atau tidak berbuat sesuatu dalam jabatannya, yang bertentangan dengan kewajibannya terkait Pengesahan APBD Pemerintah Daerah Propinsi Banten Tahun Anggaran 2016.
8. Perkara TPK atas nama terdakwa SRI MULYAHARTONO sehubungan dengan pegawai negeri atau penyelenggara negara yang bersama-sama menerima pemberian atau janji dengan maksud supaya pegawai negeri atau penyelenggara negara tersebut berbuat atau tidak berbuat sesuatu dalam jabatannya, yang bertentangan dengan kewajibannya terkait Pengesahan APBD Pemerintah Daerah Propinsi Banten Tahun Anggaran 2016.
9. Perkara TPK atas nama terdakwa DJOKO PRAMONO sehubungan dengan pengadaan dan pelaksanaan Pembangunan Balai Pendidikan dan Pelatihan Ilmu Pelayaran (BP2IP) Sorong Tahap III pada Pusat Pengembangan SDM Perhubungan Laut (PPSDML) Badan Pengembangan SDM Kementerian Perhubungan Tahun Anggaran 2011.

---

## Februari

1. Perkara TPK atas nama terdakwa DEWI ARYANILIZA ALS DEWIE YASIN LIMPO dan BAMBANG WAHYUHADI sehubungan dengan bersama-sama dengan Rinelda Bandaso, yaitu menerima

hadiah atau janji terkait usulan penganggaran Proyek Pembangunan Infrastruktur Energi Baru dan Terbarukan TA 2016 untuk Kabupaten Deiyai Propinsi Papua.

2. Perkara TPK atas nama terdakwa RINELDA BANDASO sehubungan dengan bersama-sama dengan Dewi Aryaliniza Als Dewie Yasin Limpo selaku anggota DPR RI dan Bambang Wahyuhadi, yaitu menerima hadiah atau janji terkait usulan penganggaran Proyek Pembangunan Infrastruktur Energi Baru dan Terbarukan TA 2016 untuk Kabupaten Deiyai Propinsi Papua.
3. Perkara TPK atas nama terdakwa RIAMON ISKANDAR, DARWIN, ISLAN HANURA, dan AIDIL FITRI sehubungan dengan menerima hadiah atau janji terkait dengan persetujuan Laporan Keterangan Pertanggungjawaban (LKPJ) Kepala Daerah Musi Banyuasin Tahun Anggaran 2014 dan pengesahan Anggaran Pendapatan dan Belanja Daerah (APBD) Kabupaten Musi Banyuasin Tahun Anggaran 2015.
4. Perkara TPK atas nama terdakwa PAHRI AZHARI dan LUCIANTY sehubungan dengan pemberian hadiah atau janji kepada Anggota Dewan Perwakilan Rakyat Daerah (DPRD) Kabupaten Musi Banyuasin yang terkait dengan persetujuan Laporan Keterangan Pertanggungjawaban (LKPJ) Kepala Daerah Musi Banyuasin Tahun Anggaran 2014 dan pengesahan Anggaran Pendapatan dan Belanja Daerah (APBD) Kabupaten Musi Banyuasin Tahun Anggaran 2015.
5. Perkara TPK atas nama terdakwa KAMALUDIN HARAHAHAP sehubungan dengan menerima hadiah atau janji dari Gatot Pujo Nugroho selaku Gubernur Provinsi Sumatera Utara terkait dengan: 1. Persetujuan laporan pertanggungjawaban Pemerintah Provinsi Sumatera Utara tahun anggaran 2012 oleh DPRD Provinsi Sumatera Utara; 2. Persetujuan perubahan anggaran pendapatan dan belanja daerah provinsi sumatera utara tahun anggaran 2013 oleh DPRD provinsi sumatera utara; 3. Pengesahan anggaran pendapatan dan belanja daerah provinsi sumatera utara tahun anggaran 2014 oleh DPRD provinsi sumatera utara; 4. Pengesahan anggaran pendapatan dan belanja daerah provinsi sumatera utara tahun anggaran 2015 oleh DPRD provinsi Sumatera Utara.

---

## Januari

1. Perkara TPK atas nama terdakwa MUHTAR EFENDY sehubungan dengan sengaja mencegah, merintangi atau menggagalkan secara langsung atau tidak langsung penyidikan, penuntutan dan pemeriksaan di sidang pengadilan terhadap tersangka dan terdakwa ataupun para saksi dalam perkara korupsi dan dengan sengaja tidak memberi keterangan atau memberi keterangan yang tidak benar pada persidangan atas nama terdakwa M. Akil Mochtar di Pengadilan Tindak Pidana Korupsi Jakarta.
2. Perkara TPK atas nama terdakwa ADE SWARA dan NURLATIFAH sehubungan dengan Pegawai Negeri/Penyelenggara Negara yang dengan maksud menguntungkan diri sendiri atau orang lain

secara melawan hukum atau dengan menyalahgunakan kekuasaannya memaksa seseorang memberikan sesuatu terkait pengurusan ijin Surat Persetujuan Pemanfaatan Ruang (SPPR) atas nama PT Tatar Kertabumi di Kabupaten Karawang, dan perkara TPPU sehubungan dengan dengan perbuatan menempatkan, mentransfer, mengalihkan, membelanjakan, menghibahkan, menitipkan, membawa keluar negeri, mengubah bentuk, menukarkan dengan mata uang atau surat berharga atau perbuatan lain atas harta kekayaan yang diketahui atau patut diduga merupakan hasil tindak pidana korupsi dengan tujuan menyembunyikan atau menyamarkan asal usul harta kekayaan.

3. Perkara TPK atas nama terdakwa ANNAS MAAMUN sehubungan dengan pegawai negeri atau penyelenggara negara yang menerima pemberian atau janji dengan maksud supaya pegawai negeri atau penyelenggara negara tersebut berbuat atau tidak berbuat sesuatu dalam jabatannya, yang bertentangan dengan kewajibannya terkait dengan Pengajuan Revisi Alih Fungsi Hutan di Propinsi Riau Tahun 2014 kepada kementerian Kehutanan.
4. Perkara TPK atas nama terdakwa IR. A. BAMBANG D sehubungan dengan memberi hadiah atau janji terkait dengan jual beli gas alam untuk pembangkit listrik di Gresik dan Gili Timur Bangkalan Madura, Jawa Timur dan proyek-proyek lainnya yang dilakukan oleh tersangka selaku Direktur Human Resource Development PT Media Karya Sentosa bersama dengan kawan-kawan.
5. Perkara TPK atas nama terdakwa SUTAN BHATOEKANA sehubungan dengan menerima hadiah atau janji terkait Penetapan Anggaran Pendapatan dan Belanja Negara Perubahan (APBN-P) Tahun Anggaran 2013 Kementerian Energi dan Sumber Daya Mineral (ESDM) oleh Komisi VII DPR RI dan kegiatan lainnya.
6. Perkara TPK atas nama terdakwa ABDUR ROUF sehubungan dengan menerima hadiah atau janji terkait dengan jual beli Gas Alam untuk Pembangkit Listrik di Gresik dan Gili Timur Bangkalan Madura, Jawa Timur dan proyek-proyek lainnya.
7. Perkara TPK atas nama terdakwa FUAD AMIN sehubungan dengan menerima hadiah atau janji terkait dengan jual beli gas alam untuk pembangkit listrik di Gresik dan Gili Timur Bangkalan Madura, Jawa Timur dan Proyek-proyek lainnya dan Perkara TPK sehubungan dengan menerima hadiah atau janji terkait dengan jual beli gas alam untuk pembangkit listrik di Gresik dan Gili Timur Bangkalan Madura, Jawa Timur dan perbuatan penerimaan lainnya dan Perkara TPPU sehubungan dengan perbuatan menempatkan, mentransfer, mengalihkan, membelanjakan, membayarkan, menghibahkan, menitipkan, membawa ke luar negeri, mengubah bentuk, menukarkan dengan mata uang atau surat berharga atau perbuatan lain atas Harta Kekayaan yang diketahui atau patut diduga merupakan hasil tindak pidana korupsi dengan tujuan menyembunyikan atau menyamarkan asal usul Harta Kekayaan.
8. Perkara TPK atas nama terdakwa MULYA A HASJMY sehubungan dengan pelaksanaan pengadaan peralatan kesehatan dari sisa dana pelayanan kesehatan bagi penduduk miskin dalam rangka wabah flu burung (Avian Influenza) pada Dirjen Bina Pelayanan Medik

Departemen Kesehatan dan dana APBN-P Sekretariat Dirjen Bina Pelayanan Medik Depkes TA 2006.

9. Perkara TPK atas nama terdakwa SUROSO ATMO MARTOYO sehubungan dengan penerimaan sesuatu atau uang yang diduga diberikan oleh Direktur PT. Sugih Interjaya dkk terkait dengan proyek pengadaan Tethra Ethyl Lead (TEL) di PT. Pertamina (Persero) tahun 2004 – 2005.
10. Perkara TPK atas nama terdakwa LA MUSI DIDI sehubungan dengan kegiatan Detail Engineering Design (DED) PLTA sungai Memberamo dan sungai Urumuka tahun 2009 dan 2010 di Provinsi Papua dan TPK dalam kegiatan Detail Engineering Design (DED) PLTA Danau Sentani dan Danau Paniai Tahun 2008 di Provinsi Papua dan Perkara TPK sehubungan dengan kegiatan Detail Engineering Design (DED) PLTA Danau Sentani dan Danau Paniani Tahun Anggaran 2008 di Provinsi Papua.
11. Perkara TPK atas nama terdakwa BARNABAS SUEBU sehubungan dengan kegiatan Detail Engineering Design (DED) PLTA sungai Memberamo dan sungai Urumuka Tahun 2009 dan 2010 di Propinsi Papua dan TPK dalam kegiatan Detail Engineering Design (DED) PLTA danau Sentani dan danau Paniai tahun 2008 di Propinsi Papua dan Perkara TPK sehubungan dengan kegiatan Detail Engineering Design (DED) PLTA Danau Sentani dan Danau Paniani Tahun Anggaran 2008 di Provinsi Papua.
12. Perkara TPK atas nama terdakwa RIZAL ABDULLAH sehubungan dengan Kegiatan Pembangunan Wisma Atlet dan Gedung Serbaguna Pemerintah Propinsi Sumatera Selatan Tahun 2010-2011.
13. Perkara TPK atas nama terdakwa JEFFERSON SM RUMAJAR sehubungan dengan penggunaan dana kas daerah Pemerintah kota Tomohon TA 2009 dan 2010 dan Perkara TPK sehubungan dengan penerimaan hadiah atau pemberian berupa uang kepada pemeriksa Badan Pemeriksa Keuangan Sulawesi Utara pada tahun 2008 atas laporan keuangan Pemerintah Kota Tomohon TA.2007.
14. Perkara TPK atas nama terdakwa SURYADHARMA ALI sehubungan dengan Penyelenggaraan Ibadah Haji tahun 2010 – 2013 dan Perkara TPK sehubungan dengan penggunaan DOM (Dana Operasional Menteri) pada Kementerian Agama RI tahun 2011 – 2014.
15. Perkara TPK atas nama terdakwa OTTO C. KALIGIS sehubungan dengan Memberi atau menjanjikan sesuatu berupa uang kepada Majelis Hakim dan Panitera Pengadilan Tata Usaha Negara (PTUN) Medan Sumatera Utara terkait permohonan pengujian kewenangan Kejaksaan Tinggi Negara.
16. Perkara TPK atas nama terdakwa SYAMSIR YUSFAN sehubungan dengan menerima pemberian atau janji terkait dengan penanganan perkara permohonan pengujian kewenangan Kejaksaan Tinggi Sumatera Utara sesuai dengan Undang-Undang Nomor 30 Tahun 2014 tentang Administrasi Pemerintahan atas Penyelidikan tentang dugaan terjadinya Tindak Pidana Korupsi Dana Bantuan Sosial (BANSOS), Bantuan Daerah Bawahan (BDB), Bantuan Operasional Sekolah (BOS) dan Penahanan Pencairan Dana Bagi Hasil (DBH), dan Perkara TPK sehubungan dengan

- bersama-sama memberi atau menjanjikan sesuatu berupa uang kepada Majelis Hakim dan Panitera Pengadilan Tata Usaha Negara (PTUN) Medan Sumatera Utara terkait permohonan pengujian kewenangan Kejaksaan Tinggi Sumatera Utara sesuai dengan Undang-Undang Nomor 30 Tahun 2014 tentang Administrasi Pemerintahan atas Penyelidikan tentang dugaan terjadinya Tindak Pidana Korupsi Dana Bantuan Sosial (BANSOS), Bantuan Daerah Bawahan (BDB), Bantuan Operasional Sekolah (BOS) dan Penahanan Pencairan Dana Bagi Hasil (DBH).
17. Perkara TPK atas nama terdakwa BAMBANG WIRATMADJI SOEHARTO sehubungan dengan bersama-sama Lusita Anie Razak, Subri dan Apriyanto Kurniawan, memberi atau menjanjikan sesuatu kepada pegawai negeri atau penyelenggara negara dengan maksud supaya pegawai negeri atau penyelenggara negara tersebut berbuat atau tidak berbuat sesuatu dalam jabatannya yang bertentangan dengan kewajibannya atau memberi sesuatu kepada pegawai negeri atau penyelenggara negara karena atau berhubungan dengan sesuatu yang bertentangan dengan kewajiban dilakukan atau tidak dilakukan dalam jabatannya terkait dengan pengurusan perkara tindak pidana menempatkan keterangan palsu di atas bukti autentik dan pemalsuan atas sertifikat tanah dengan terlapor Sugiharta Alias Along.
18. Perkara TPK atas nama terdakwa JERO WACIK sehubungan dengan menguntungkan diri sendiri atau orang lain secara melawan hukum atau menyalahgunakan kekuasaannya memaksa seseorang memberikan sesuatu, membayar, atau untuk mengerjakan sesuatu bagi dirinya sendiri, pada tahun 2011 s/d 2013, di Kementerian Energi dan Sumber Daya Mineral dan Perkara TPK sehubungan dengan memperkaya diri sendiri atau orang lain atau penyalahgunaan kewenangan, kesempatan atau sarana yang ada padanya karena jabatan atau kedudukan yang dapat merugikan keuangan negara yang dilakukan oleh Menteri Kebudayaan dan Pariwisata/Menteri Pariwisata dan Ekonomi Kreatif pada Tahun 2008 – 2011.
19. Perkara TPK atas nama terdakwa BUDI ANTONI ALJUFRI dan SUZANA BUDI ANTONI sehubungan dengan memberi atau menjanjikan sesuatu kepada hakim dengan maksud untuk mempengaruhi putusan perkara yang diserahkan kepadanya untuk diadili terkait dengan sengketa pemilihan kepala daerah Kabupaten Empat Lawang di Mahkamah Konstitusi tahun 2013 dan dengan sengaja tidak memberikan keterangan atau memberikan keterangan yang tidak benar pada waktu persidangan terdakwa M. Akil Mochtar di pengadilan TPK Jakarta.
20. Perkara TPK Atas nama terdakwa AMIR FAUZI sehubungan dengan menerima pemberian atau janji terkait dengan penanganan perkara permohonan pengujian kewenangan Kejaksaan Tinggi Sumatera Utara sesuai dengan Undang-Undang Nomor 30 Tahun 2014 tentang Administrasi Pemerintahan atas Penyelidikan tentang dugaan terjadinya Tindak Pidana Korupsi Dana Bantuan Sosial (BANSOS), Bantuan Daerah Bawahan (BDB), Bantuan Operasional Sekolah (BOS) dan Penahanan Pencairan Dana Bagi Hasil (DBH).
21. Perkara TPK Atas nama terdakwa DERMAWAN GINTING sehubungan dengan menerima pemberian atau janji terkait dengan penanganan perkara permohonan pengujian kewenangan Kejaksaan Tinggi Sumatera Utara sesuai dengan Undang-Undang Nomor 30 Tahun 2014

tentang Administrasi Pemerintahan atas Penyelidikan tentang dugaan terjadinya Tindak Pidana Korupsi Dana Bantuan Sosial (BANSOS), Bantuan Daerah Bawahan (BDB), Bantuan Operasional Sekolah (BOS) dan Penahanan Pencairan Dana Bagi Hasil (DBH).

22. Perkara TPK atas nama terdakwa MADE MEREGAWA sehubungan dengan Pengadaan Alat Kesehatan Rumah Sakit Khusus Pendidikan Penyakit Infeksi dan Pariwisata Universitas Udayana pada Tahun Anggaran 2009.
23. Perkara TPK atas nama terdakwa IRAWAN sehubungan dengan Pengadaan dan Pelaksanaan Proyek Pembangunan Diklat Pelayaran Sorong Tahap III pada Pusat Pengembangan Sumber Daya Manusia Perhubungan Laut, Badan Pengembangan Sumber Daya Manusia Perhubungan, Kementerian Perhubungan Republik Indonesia TA 2011.
24. Perkara TPK atas nama terdakwa SUGIARTO sehubungan dengan Pengadaan dan Pelaksanaan Proyek Pembangunan Diklat Pelayaran Sorong Tahap III pada Pusat Pengembangan Sumber Daya Manusia Perhubungan Laut, Badan Pengembangan Sumber Daya Manusia Perhubungan, Kementerian Perhubungan Republik Indonesia TA 2011.
25. Perkara TPK atas nama terdakwa BUDI RACHMAT KURNIAWAN sehubungan dengan Pengadaan dan Pelaksanaan Proyek Pembangunan Diklat Pelayaran Sorong Tahap III pada Pusat Pengembangan Sumber Daya Manusia Perhubungan Laut, Badan Pengembangan Sumber Daya Manusia Perhubungan, Kementerian Perhubungan Republik Indonesia TA 2011.
26. Perkara TPK atas nama terdakwa ILHAM ARIEF SIRADJUDDIN sehubungan dengan pelaksanaan Kerjasama Rehabilitasi, Kelola dan Transfer untuk Instalasi Pengolahan Air antara PDAM Kota Makassar dengan Pihak Swasta periode Tahun 2005 – 2013.
27. Perkara TPK atas nama terdakwa TEUKU SYAIFUL ACHMAD sehubungan dengan pelaksanaan proyek pembangunan dermaga bongkar pada kawasan perdagangan bebas dan pelabuhan bebas Sabang yang dibiayai Anggaran Pendapatan dan Belanja Negara (APBN) TA 2006 – 2010.
28. Perkara TPK atas nama terdakwa TRIPENI IRIANTO PUTRO sehubungan dengan menerima pemberian atau janji terkait dengan penanganan perkara permohonan pengujian kewenangan Kejaksaan Tinggi Sumatera Utara sesuai dengan Undang-Undang Nomor 30 Tahun 2014 tentang Administrasi Pemerintahan atas Penyelidikan tentang dugaan terjadinya Tindak Pidana Korupsi Dana Bantuan Sosial (BANSOS), Bantuan Daerah Bawahan (BDB), Bantuan Operasional Sekolah (BOS) dan Penahanan Pencairan Dana Bagi Hasil (DBH).
29. Perkara TPK atas nama terdakwa PATRICE RIO CAPELLA sehubungan dengan menerima hadiah atau janji dari Gatot Pujo Nugroho selaku Gubernur Sumatera Utara dan Evy Susanti terkait dengan dugaan terjadinya Tindak Pidana Korupsi Dana Bantuan Sosial (Bansos), Bantuan Daerah Bawah (BDB), Bantuan Operasional Sekolah (BOS), Tunggakan Dana Bagi Hasil (DBH), dan Penyertaan Modal pada sejumlah BUMD pada Pemerintah Provinsi Sumatera Utara yang Sedang dilakukan penyelidikan oleh Kejaksaan Tinggi atau Kejaksaan Agung Indonesia.

30. Perkara TPK atas nama terdakwa MOH. YAGARI BHASTARA GUNTUR sehubungan dengan Memberi atau Menjanjikan sesuatu berupa uang kepada Majelis Hakim dan Panitera Pengadilan Tata Usaha Negara (PTUN) Medan Sumatera Utara yang dilakukan oleh Tersangka selaku salah seorang Kuasa Hukum dari Kepala Biro Keuangan Sekretariat Daerah Propinsi Sumatera Utara terkait permohonan pengujian kewenangan Kejaksaan Tinggi Sumatera Utara sesuai dengan Undang-Undang Nomor 30 Tahun 2014 tentang Administrasi Pemerintahan atas penyelidikan tentang dugaan terjadinya Tindak Pidana Korupsi Dana Bantuan Sosial (BANSOS), Bantuan Daerah Bawahan (BDB), Bantuan Operasional Sekolah (BOS) dan Penahanan Pencairan Dana Bagi Hasil (DBH).
31. Perkara TPK atas nama terdakwa JAMALUDDIEN MALIK sehubungan dengan pegawai negeri atau penyelenggara negara yang dengan maksud menguntungkan diri sendiri atau orang lain yang secara melawan hukum atau menyalahgunakan kekuasaannya memaksa seseorang memberikan sesuatu, membayar, atau menerima pembayaran dengan potongan atau untuk mengerjakan sesuatu bagi dirinya sendiri atau yang pada waktu menjalankan tugas, meminta, menerima, memotong pembayaran kepada pegawai negeri atau penyelenggara negara lain atau kas umum tersebut mempunyai utang kepadanya, padahal diketahui bahwa hal tersebut bukan merupakan utang terkait dana kegiatan Tahun Anggaran 2013 – 2014 dan dana tugas pembantuan Tahun Anggaran 2014 pada Direktorat Jenderal Pembinaan Pembangunan Kawasan Transmigrasi Kementerian Tenaga Kerja dan Transmigrasi (Ditjen P2KTrans).
32. Perkara TPK atas nama terdakwa HENGKY WIDJAJA sehubungan dengan pelaksanaan Kerjasama Rehabilitasi, Kelola dan Transfer untuk Instalasi Pengolahan Air antara PDAM Kota Makassar dengan pihak swasta periode tahun 2006 – 2011.
33. Perkara TPK atas nama terdakwa MUHAMMAD NAZARUDDIN sehubungan dengan penerimaan hadiah atau janji padahal patut diketahui atau diduga bahwa hadiah tersebut diberikan sebagai akibat atau disebabkan karena telah melakukan atau tidak melakukan sesuatu dalam jabatannya yang bertentangan dengan kewajibannya sehubungan dengan penganggaran dan pelaksanaan proyek yang dikerjakan oleh PT. DGI dan lain-lain tahun 2010 dan perkara TPPU terkait dengan TPK sehubungan dengan transaksi pembelian saham PT. Garuda di Mandiri Sekuritas oleh PT. Permai Raya Wisata, PT. Cakrawala Abadi, PT. Exartech Teknologi Utama, PT. Pasific Putra Metropolitan, PT. Darmakusumah dan transaksi lainnya dan Perkara TPPU atas nama terdakwa MUHAMMAD NAZARUDDIN sehubungan dengan perbuatan menempatkan, mentransfer, mengubah bentuk, dan atau menyembunyikan/menyamarkan asal usul, sumber, lokasi, kepemilikan dan atau perbuatan menerima atau menguasai penempatan, pentransferan, pembayaran atau menggunakan harta kekayaan yang diketahui atau patut diduga merupakan hasil tindak pidana.
34. Perkara TPK atas nama terdakwa GATOT PUJO NUGROHO dan EVY SUSANTI sehubungan dengan memberi atau menjanjikan sesuatu berupa uang kepada Majelis Hakim dan Panitera Pengadilan Tata Usaha Negara (PTUN) Medan Sumatera Utara terkait permohonan pengujian



kewenangan Kejaksaan Tinggi Sumatera Utara sesuai dengan Undang-Undang Nomor 30 Tahun 2014 tentang Administrasi Pemerintahan atas penyelidikan tentang dugaan terjadinya Tindak Pidana Korupsi Dana Bantuan Sosial (BANSOS), Bantuan Daerah Bawahan (BDB), Bantuan Operasional Sekolah (BOS) dan Penahanan Pencairan Dana Bagi Hasil (DBH).

35. Perkara TPK atas nama terdakwa GATOT PUJO NUGROHO dan EVY SUSANTI sehubungan dengan memberi hadiah atau janji kepada Patrice Rio Capella selaku Anggota DPR RI terkait dengan dugaan TPK Dana bantuan Sosial (Bansos), Bantuan Daerah Bawah (BDB), Bantuan Operasional Sekolah (BOS), Tunggakan Dana Bagi Hasil (DBH), dan penyertaan modal pada sejumlah BUMD pada Pemerintah Provinsi Sumatera Utara yang sedang dilakukan penyelidikan oleh Kejaksaan Tinggi Sumatera Utara dan atau Kejaksaan Agung RI.
36. Perkara TPK atas nama terdakwa SETIADY JUSUF dan IRENIUS ADII sehubungan dengan memberi hadiah atau janji kepada Dewi Aryaliniza Als Dewie Yasin Limpo selaku anggota DPR RI bersama-sama dengan Bambang Wahyuhadi dan Rinelda Bandaso terkait usulan penganggaran Proyek Pembangunan Infrastruktur Energi Baru dan Terbarukan TA 2016 untuk Kabupaten Deiyai Propinsi Papua.
37. Perkara TPK atas nama terdakwa RUDYANTO sehubungan dengan secara bersama-sama atau turut serta terkait perbuatan Ikmal Jaya selaku Walikota Tegal periode 2009 s.d. 2014 dalam pelaksanaan tukar guling tanah antara Pemerintah Kota Tegal dengan pihak Swasta pada tahun 2012.
38. Perkara TPK atas nama terdakwa RICKY TAMPINONGKOL sehubungan dengan memberi atau menjanjikan sesuatu kepada pegawai negeri atau penyelenggara negara dengan maksud supaya pegawai negeri atau penyelenggara negara tersebut berbuat atau tidak berbuat sesuatu dalam jabatannya, yang bertentangan dengan jabatannya terkait dengan pengesahan APBD Pemerintah Daerah Provinsi Banten T.A. 2016.

---

**Share :**

Bagikan 0

Tweet

## PENINDAKAN

Penyidikan (/id/berkas/penindakan/penyidikan)

Penuntutan (/id/berkas/penindakan/penuntutan)

Inkracht (/id/berkas/penindakan/inkracht)

Jejak Kasus (/id/jejak-kasus)





























**LINK**

TENTANG ACCH (/ID/TENTANG-ACCH).

DISCLAIMER (/ID/DISCLAIMER).

KETENTUAN (/ID/KETENTUAN).

SITEMAP (/ID/SITEMAP).

## REDAKSI ACCH

KOMISI PEMBERANTASAN KORUPSI  
JL. KUNINGAN PERSADA KAV. 4 JAKARTA 12950  
TELP: (021) 2557 8300 EXT. 8642  
EMAIL: [ACCH@KPK.GO.ID](mailto:ACCH@KPK.GO.ID)  
([MAILTO:ACCH@KPK.GO.ID](mailto:ACCH@KPK.GO.ID))

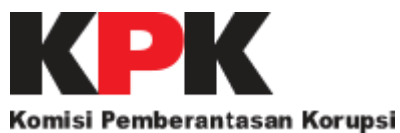

(<https://www.f3.ca/submitting-ideas-to-the-grant-panels/for-us>)
