# Supplementary material for: Democratization, leader education and growth: firm-level evidence from Indonesia
Source: Springer Nature journal article supplement (doi:10.1007/s10887-022-09221-5), 2023-02-15
Supplement: MOESM2 [file Penuntutan 2017.pdf › Data/Mayor-level corruption dataset (incl sources)/KPK Penuntutan 2011-/Penuntutan 2017.pdf]

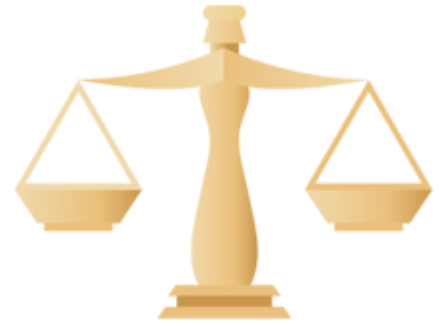

# PENINDAKAN

Menyajikan informasi perkembangan penanganan tindak pidana korupsi yang dilakukan oleh Komisi Pemberantasan Korupsi.

[Beranda \(/id/\)](#) / [Berkas](#) / [PENINDAKAN](#) / [Penuntutan \(/id/berkas/penindakan/penuntutan\)](#) / [Penuntutan 2017](#)

## PENUNTUTAN

### Penuntutan 2017

Ditulis oleh admin.acch. Diposting di [Penuntutan \(/id/berkas/penindakan/penuntutan\)](#). Dilihat: 5915

Sepanjang tahun 2017, kegiatan penuntutan yang dilaksanakan oleh KPK sebanyak 144 (seratus empat puluh empat) perkara, yang terdiri atas perkara sisa tahun 2016 sebanyak 41 (empat puluh satu) perkara dan perkara tahun 2017 sebanyak 103 (seratus tiga) perkara.

#### Desember

1. Perkara TPK sehubungan dengan Pengadaan Paket Penerapan Kartu Tanda Penduduk Berbasis Nomor Induk Kependudukan Secara Nasional (KTP Elektronik) Tahun 2011 s.d 2012 pada Kementerian Dalam Negeri Republik Indonesia, bersama-sama dengan Anang Sugiana Sudihardjo, Andi Agustinus alias Andi Narogong, Irman selaku Direktur Jenderal Kependudukan dan Pencatatan Sipil Kementerian Dalam Negeri Republik Indonesia dan Sugiharto selaku Pejabat Pembuat Komitmen (PPK) Direktorat Jenderal Kependudukan dan Pencatatan Sipil Kementerian Dalam Negeri Republik Indonesia dan kawan-kawan atas nama tersangka SETYA NOVANTO. Sprin.Juk-99/b/24/12/2017 tanggal 05 Desember 2017. BP-91/23/11/2017 tanggal 22 November 2017.

2. Perkara TPK sehubungan dengan Penyelenggara Negara yang bersama-sama dengan Eko Susilo Hadi dan Bambang Udoyo yaitu menerima hadiah atau janji tersebut diberikan untuk menggerakkan agar melakukan atau tidak melakukan sesuatu dalam jabatannya yang bertentangan dengan kewajibannya terkait dengan Proses Pengadaan Satelit Monitoring di Bakamla RI pada APBN-P TA 2016 atas nama terdakwa NOFEL HASAN. Sprin.Juk-100/b/24/12/2017 tanggal 08 Desember 2017. BP-94/23/11/2017 tanggal 27 November 2017.
3. Perkara TPK sehubungan dengan memberi atau menjanjikan sesuatu kepada Sigit Yugoharto selaku Auditor BPK RI dengan maksud supaya pegawai negeri atau penyelenggara negara tersebut berbuat atau tidak berbuat sesuatu dalam jabatannya atau karena berhubungan dengan sesuatu yang bertentangan dengan kewajibannya terkait dengan Pemeriksaan dengan Tujuan Tertentu ( PDDT ) terhadap PT. Jasa Marga (Persero) pada tahun 2017 atas nama terdakwa SETIA BUDI. Sprin.Juk-101/b/24/12/2017 tanggal 11 Desember 2017. BP-95/23/12/2017 tanggal 5 Desember 2017.
4. Perkara TPK sehubungan dengan menerima hadiah atau janji dari Akhmad Zaini, SH selaku Kuasa Hukum PT AQUAMARINE DIVINDO INSPECTION bersama-sama dengan Ir. YUNUS NAFIK selaku Direktur Utama PT. AQUAMARINE DIVINDO INSPECTION terkait perkara perdata No. 688/Pdt.G/2016/PN. Jkt. Selatan tentang Wanprestasi Kerjasama Pemasangan Rantai di Kapal antara PT. EASTERN JASON FABRICATION selaku penggugat dengan PT AQUAMARINE DIVINDO INSPECTION selaku tergugat atas nama tersangka TARMIZI. Sprin.Juk-104/b/24/12/2017 tanggal 18 Desember 2017. BP-96/23/12/2017 tanggal 12 Desember 2017.
5. Perkara TPK sehubungan dengan menerima hadiah atau janji terkait perijinan dan pengadaan proyek-proyek barang dan jasa di lingkungan Direktorat Jenderal Perhubungan Laut Tahun Anggaran 2016-2017 atas nama tersangka ANTONIUS TONNY BUDIONO. Sprin.Juk-105/b/24/12/2017 tanggal 21 Desember 2017. BP-97/23/12/2017 tanggal 14 Desember 2017.
6. Perkara TPK sehubungan dengan memberi hadiah atau janji kepada Taufiqurrahman selaku Bupati Nganjuk periode tahun 2013 – 2018 bersama-sama Ibnu Hajar selaku Kepala Dinas Pendidikan dan Kebudayaan Pemerintah Kabupaten Nganjuk dan Suwandi selaku Kepala SMP Negeri 3 Ngronggot Kabupaten Nganjuk terkait Mutasi dan Promosi Jabatan di lingkungan Pemerintah Kabupaten Nganjuk, yang diduga dilakukan atas nama tersangka HARJANTO. Sprin.Juk-106/b/24/12/2017 tanggal 22 Desember 2017. BP-98/23/12/2017 tanggal 15 Desember 2017.
7. Perkara TPK sehubungan dengan memberi hadiah atau janji kepada Taufiqurrahman selaku Bupati Nganjuk periode tahun 2013 – 2018 bersama-sama Ibnu Hajar selaku Kepala Dinas Pendidikan dan Kebudayaan Pemerintah Kabupaten Nganjuk dan Suwandi selaku Kepala SMP Negeri 3 Ngronggot Kabupaten Nganjuk terkait Mutasi dan Promosi Jabatan di lingkungan Pemerintah Kabupaten Nganjuk atas nama tersangka MOKHAMMAD BISRI. Sprin.Juk-107/b/24/12/2017 tanggal 22 Desember 2017. BP-99/23/12/2017 tanggal 15 Desember 2017.

8. Perkara TPK sehubungan dengan penerimaan hadiah atau janji bersama-sama dengan SITI MASHITA SOEPARNO selaku Wali Kota Tegal dan kawan-kawan terkait dengan Pengelolaan Dana Jasa Pelayanan RSUD Kardinah Kota Tegal Tahun 2017 dan Pengadaan Barang dan Jasa di lingkungan Kota Tegal Tahun Anggaran 2017 atas nama tersangka AMIR MIRZA HUTAGALUNG. Sprin.Juk-108/b/24/12/2017 tanggal 22 Desember 2017. BP-100/23/12/2017 tanggal 19 Desember 2017.
  9. Perkara TPK sehubungan dengan penerimaan hadiah atau janji terkait dengan Pengelolaan Dana Jasa Pelayanan RSUD Kardinah Kota Tegal Tahun 2017 dan Pengadaan Barang dan Jasa di lingkungan Kota Tegal Tahun Anggaran 2017 atas nama tersangka SITI MASHITA SOEPARNO. Sprin.Juk-109/b/24/12/2017 tanggal 22 Desember 2017. BP-101/23/12/2017 tanggal 19 Desember 2017.
- 

## **November**

1. Perkara TPK sehubungan dengan memberi hadiah atau janji kepada Suryana selaku Anggota Majelis Hakim Pengadilan Tindak Pidana Korupsi pada Pengadilan Negeri Bengkulu bersama-sama dengan Hendra Kurniawan selaku Panitera Pengganti Pengadilan Tindak Pidana Korupsi pada Pengadilan Negeri Bengkulu dan kawan-kawan, yang diduga dilakukan oleh Tersangka dan kawan-kawan, sehubungan dengan persidangan perkara Tindak Pidana Korupsi Dana Kegiatan Rutin APBD Tahun Anggaran 2013 s.d 2014 di DPPKAD Kota Bengkulu atas nama Wilson, di Pengadilan Tindak Pidana Korupsi pada Pengadilan Negeri Bengkulu atas nama terdakwa SYUHADATUL ISLAMY Alias LEMI. Sprin.Juk-83/b/24/11/2017 tanggal 2 November 2017. BP-75/23/10/2017 tanggal 23 Oktober 2017.
2. Perkara TPK sehubungan dengan menerima hadiah atau janji dari Syuhadatul Islamy Alias Lemi dan kawan-kawan terkait dengan persidangan perkara Tindak Pidana Korupsi Dana Kegiatan Rutin APBD Tahun Anggaran 2013 s.d 2014 di DPPKAD Kota Bengkulu atas nama Terdakwa Wilson, di Pengadilan Tindak Pidana Korupsi pada Pengadilan Negeri Bengkulu atas nama terdakwa SURYANA dan HENDRA KURNIAWAN. Sprin.Juk-84/b/24/11/2017 tanggal 2 November 2017. BP-76/23/10/2017 tanggal 23 Oktober 2017.
3. Perkara TPK sehubungan dengan pemberian hadiah atau janji kepada Penyelenggara Negara terkait dengan Pengadaan Barang dan Jasa di lingkungan Pemerintah Kota Batu Tahun Anggaran 2017 atas nama terdakwa FILIPUS DJAP. Sprin.Juk-85/b/24/11/2017 tanggal 8 November 2017. Sprin.Juk-85/b/24/11/2017 tanggal 8 November 2017.
4. Perkara TPK sehubungan dengan bersama-sama dengan tersangka Trensisi selaku Manager Keuangan PDAM Bandarmasih kota Banjarmasin yaitu memberi atau menjanjikan sesuatu dengan maksud supaya pegawai negeri atau penyelenggara negara tersebut berbuat atau tidak berbuat sesuatu dalam jabatannya atau karena berhubungan dengan sesuatu yang bertentangan dengan kewajibannya terkait dengan Persetujuan Penetapan Peraturan Daerah

Tentang Penambahan Penyertaan Modal Kepada Perusahaan Daerah Air Minum Bandarmasih Tahun 2017 atas nama terdakwa MUSLIH dan TRENSIS. Sprin.Juk-86/b/24/11/2017 tanggal 9 November 2017. BP-79/23/11/2017 tanggal 3 November 2017.

5. Perkara TPK sehubungan dengan melakukan beberapa perbuatan memberi sesuatu kepada pegawai negeri atau penyelenggara negara Ok. Arya Zulkarnain selaku Bupati Batubara periode 2013 s.d 2018 dan Helman Herdady selaku Kadis PUPR Kabupaten Batubara dan Sujendi Tarsono Alias Ayen untuk mendapatkan proyek pembangunan jembatan Sentang Perbatasan Kel. Labuhan Ruku menuju Desa Sintang dan proyek Jembatan Se Magung Kecamatan. Medang Deras di Kabupaten Batubara Tahun Anggaran 2017 atas nama terdakwa MARINGAN SITUMORANG. Sprin.Juk-87/b/24/11/2017 tanggal 9 November 2017. BP-81/23/11/2017 tanggal 6 November 2017.
6. Perkara TPK sehubungan dengan memberi sesuatu kepada pegawai negeri atau penyelenggara negara Ok. Arya Zulkarnain selaku Bupati Batubara periode 2013 s.d 2018, Helman Herdady selaku Kadis PUPR Kabupaten Batubara dan Sujendi Tarsono Alias Ayrn karena telah mendapatkan proyek pekerjaan betonisasi Jalan di Kecamatan Talawi Kabupaten Batubara Tahun Anggaran 2017 atas nama terdakwa SYAIFUL AZHAR. Sprin.Juk-88/b/24/11/2017 tanggal 9 November 2017. BP-82/23/11/2017 tanggal 6 November 2017.
7. Perkara TPK menerima hadiah atau janji dari So Kok Seng alias Aseng selaku Komisaris PT. Cahaya Mas Perkasa untuk mendapatkan proyek di Kementerian Pekerjaan Umum dan Perumahan Rakyat tahun anggaran 2015 dan tahun anggaran 2016 atas nama terdakwa YUDI WIDIANA ADIA. BP-82/23/11/2017 tanggal 6 November 2017.
8. Perkara TPK sehubungan dengan secara bersama-sama memberi atau menjanjikan sesuatu kepada pegawai negeri atau penyelenggara negara dengan maksud supaya pegawai negeri atau penyelenggara negara tersebut berbuat atau tidak berbuat sesuatu dalam jabatannya, yang bertentangan dengan kewajibannya terkait dengan Pengurusan Perizinan untuk Pembangunan Mall Transmart di Cilegon atas nama terdakwa TUBAGUS DONY SUGIHMUKTI. Sprin.Juk-91/b/24/11/2017 tanggal 20 November 2017. BP-83/23/11/2017 tanggal 14 November 2017.
9. Perkara TPK sehubungan dengan secara bersama-sama memberi atau menjanjikan sesuatu kepada pegawai negeri atau penyelenggara negara dengan maksud supaya pegawai negeri atau penyelenggara negara tersebut berbuat atau tidak berbuat sesuatu dalam jabatannya, yang bertentangan dengan kewajibannya terkait dengan Pengurusan Perizinan untuk Pembangunan Mall Transmart di Cilegon atas nama terdakwa EKA WANDORO. Sprin.Juk-92/b/24/11/2017 tanggal 20 November 2017. BP-84/23/11/2017 tanggal 14 November 2017.
10. Perkara TPK sehubungan dengan secara bersama-sama memberi atau menjanjikan sesuatu kepada pegawai negeri atau penyelenggara negara dengan maksud supaya pegawai negeri atau penyelenggara negara tersebut berbuat atau tidak berbuat sesuatu dalam jabatannya, yang bertentangan dengan kewajibannya terkait dengan Pengurusan Perizinan untuk

Pembangunan Mall Transmart di Cilegon atas nama terdakwa BAYU DWINANTO UTOMO. Sprin.Juk-93/b/24/11/2017 tanggal 20 November 2017. BP-85/23/11/2017 tanggal 14 November 2017.

11. Perkara TPK pengadaan pupuk urea tablet di Perum Perhutani unit 1 Jawa Tengah Tahun 2010 – 2011 atas nama terdakwa ASEP SUDRAJAT SANUSI. Sprin.Juk-94/b/24/11/2017 tanggal 23 November 2017. BP-90/23/11/2017 tanggal 17 November 2017.
12. Perkara TPK pengadaan pupuk urea tablet di Perum Perhutani unit 1 Jawa Tengah Tahun 2012 – 2013 atas nama terdakwa TEGUH HADI SISWANTO. Sprin.Juk-95/b/24/11/2017 tanggal 23 November 2017. BP-86/23/11/2017 tanggal 16 November 2017.
13. Perkara TPK pengadaan pupuk urea tablet di Perum Perhutani unit 1 Jawa Tengah Tahun 2012 – 2013 atas nama terdakwa LIBRATO EL ARIF. Sprin.Juk-96/b/24/11/2017 tanggal 23 November 2017. BP-87/23/11/2017 tanggal 16 November 2017.
14. Perkara TPK pengadaan pupuk urea tablet di Perum Perhutani unit 1 Jawa Tengah Tahun 2010 – 2011 atas nama terdakwa HERU SISWANTO. Sprin.Juk-97/b/24/11/2017 tanggal 28 November 2017. BP-92/23/11/2017 tanggal 23 November 2017.
15. Perkara TPK pengadaan pupuk urea tablet di Perum Perhutani unit 1 Jawa Tengah Tahun 2010 – 2011 atas nama terdakwa BAMBANG WURYANTO. Sprin.Juk-98/b/24/11/2017 tanggal 28 November 2017. BP-93/23/11/2017 tanggal 23 November 2017.

---

## Oktober

1. Perkara TPK memberi hadiah atau janji terkait dengan fungsi pengawasan dan pemantauan oleh DPRD Provinsi Jawa Timur terhadap pelaksanaan peraturan daerah dan penggunaan anggaran di provinsi jawa timur tahun anggaran 2016 – 2017 dan pengurusan Revisi Perda No. 3 Tahun 2012 tentang Pengendalian Ternak Sapi dan Kerbau Betina pada Dinas Peternakan Propinsi Jawa Timur atas nama terdakwa MOCHAMAD BASUKI, SANTOSO dan R. RAHMAN AGUNG. Sprin.Juk-74/b/24/10/2017 tanggal 03 Oktober 2017. BP-67/23/09/2017 tanggal 19 September 2017.
2. Perkara TPK bersama-sama menerima hadiah atau janji terkait dengan pengumpulan data atau bahan keterangan atas pelaksanaan proyek-proyek di Balai Wilayah Sungai Sumatera VII Provinsi Bengkulu Tahun Anggaran 2015 dan 2016 atas nama terdakwa PARLIN PURBA. Sprin.Juk-75/b/24/10/2017 tanggal 5 Oktober 2017. BP-68/23/09/2017 tanggal 29 September 2017.
3. Perkara TPK sehubungan dengan penerimaan hadiah atau janji yang diberikan oleh Achmad Syafii selaku Bupati Pamekasan, Sutjipto Utomo, Agus Mulyadi, dan Noer Salehhoddin alias MARGONO terkait kegiatan pengumpulan keterangan dan data atas dugaan penyelewangan Dana Desa di Desa Dasok Kecamatan Pademawu , Kabupaten Pamekasan atas nama terdakwa

RUDI INDRA PRASETYA. Sprin.Juk-76/b/24/10/2017 tanggal 18 Oktober 2017. BP-72/23/10/2017 tanggal 12 Oktober 2017.

4. Perkara TPK sehubungan dengan bersama sama dengan Ir. Yusuf Nafik selaku Direktur Utama PT AQUAMARINE DIVINDO INSPECTION, yaitu memberi hadiah atau janji kepada Tarmizi, SH, MH selaku Panitera Pengganti pada Pengadilan Negeri Jakarta Selatan terkait perkara perdata No. 688/Pdt.G/2016/PN. Jkt. Selatan tentang Wanprestasi Kerjasama Pemasangan Rantai di Kapal antara PT. EASTERN JASON FABRICATION selaku penggugat dengan PT AQUAMARINE DIVINDO INSPECTION selaku tergugat atas nama terdakwa AKHMAD ZAINI. Sprin.Juk-77/b/24/10/2017 tanggal 19 Oktober 2017. BP-69/23/10/2017 tanggal 03 Oktober 2017.
5. Perkara TPK sehubungan dengan bersama sama dengan Akhmad Zaini, SH selaku Kuasa Hukum PT AQUAMARINE DIVINDO INSPECTION, yaitu memberi hadiah atau janji kepada Tarmizi, SH, MH selaku Panitera Pengganti pada Pengadilan Negeri Jakarta Selatan terkait perkara perdata No. 688/Pdt.G/2016/PN. Jkt. Selatan tentang Wanprestasi Kerjasama Pemasangan Rantai di Kapal antara PT. EASTERN JASON FABRICATION selaku penggugat dengan PT AQUAMARINE DIVINDO INSPECTION selaku tergugat atas nama terdakwa YUNUS NAFIK. Sprin.Juk-78/b/24/10/2017 tanggal 19 Oktober 2017.
6. Perkara TPK sehubungan dengan memberi hadiah atau janji terkait perijinan dan pengadaan proyek-proyek barang dan jasa di lingkungan Direktorat Jenderal Perhubungan Laut Tahun Anggaran 2016-2017 atas nama terdakwa ADIPUTRA KURNIAWAN. Sprin.Juk-79/b/24/10/2017 tanggal 20 Oktober 2017. BP-73/23/10/2017 tanggal 13 Oktober 2017.
7. Perkara TPK sehubungan dengan menerima hadiah atau janji terkait fungsi pengawasan dan pemantauan oleh Dewan Perwakilan Rakyat Daerah Provinsi Jawa Timur terhadap pelaksanaan Peraturan Daerah dan Penggunaan Anggaran di Provinsi Jawa Timur Tahun Anggaran 2016-2017 atas nama terdakwa MOH KABIL MUBAROK. Sprin.Juk-80/b/24/10/2017 tanggal 24 Oktober 2017. BP-71/23/10/2017 tanggal 10 Oktober 2017.
8. Perkara TPK sehubungan dengan pemberian hadiah atau janji kepada Penyelenggara Negara terkait dengan Pengelolaan Dana Jasa Layanan RSUD Kardinah Kota Tegal Tahun 2017 atas nama terdakwa CAHYO SUPRIADI. Sprin.Juk-81/b/24/10/2017 tanggal 25 Oktober 2017. BP-74/23/10/2017 tanggal 10 Oktober 2017.
9. Perkara TPK dalam Persetujuan Pencadangan Wilayah Pertambangan, Persetujuan Izin Usaha Pertambangan (IUP) Eksplorasi dan Persetujuan Peningkatan Izin Usaha Pertambangan Eksplorasi menjadi Izin Usaha Pertambangan Operasi Produksi kepada PT. Anugrah Harisma Barakah di Wilayah Provinsi Sulawesi Tenggara Tahun 2008-2014 atas nama terdakwa NUR ALAM. Sprin.Juk-82/b/24/10/2017 tanggal 31 Oktober 2017. BP-77/23/10/2017 tanggal 24 Oktober 2017.

1. Perkara TPK menerima hadiah atau janji terkait Pembahasan Perubahan APBD pada Dinas Pekerjaan Umum dan Penataan Ruang Pemerintah Kota Mojokerto Tahun Anggaran 2017 atas nama terdakwa ABDULLAH FANANI. Sprin.Juk-62/b/24/09/2017 tanggal 13 September 2017. BP-55/23/09/2017 tanggal 08 September 2017.
2. Perkara TPK menerima hadiah atau janji terkait Pembahasan Perubahan APBD pada Dinas Pekerjaan Umum dan Penataan Ruang Pemerintah Kota Mojokerto Tahun Anggaran 2017 atas nama terdakwa UMAR FARUQ. Sprin.Juk-63/b/24/09/2017 tanggal 13 September 2017. BP-56/23/09/2017 tanggal 08 September 2017.
3. Perkara TPK menerima hadiah atau janji terkait Pembahasan Perubahan APBD pada Dinas Pekerjaan Umum dan Penataan Ruang Pemerintah Kota Mojokerto Tahun Anggaran 2017 atas nama terdakwa PURNOMO. Sprin.Juk-64/b/24/09/2017 tanggal 13 September 2017. BP-57/23/09/2017 tanggal 08 September 2017.
4. Perkara TPK bersama-sama dengan Ridwan Mukti dan Lily Martiani Maddari yaitu menerima hadiah atau janji dari Jhony Wijaya dkk terkait proyek-proyek di Lingkungan Pemerintah Provinsi Bengkulu Tahun Anggaran 2017 atas nama terdakwa RICO DIANSARI. Sprin.Juk-65/b/24/09/2017 tanggal 13 September 2017. BP-58/23/09/2017 tanggal 08 September 2017.
5. Perkara TPK menerima hadiah atau janji dari Jhony Wijaya dkk terkait proyek-proyek di Lingkungan Pemerintah Provinsi Bengkulu Tahun Anggaran 2017 atas nama terdakwa RIDWAN MUKTI dan LILY MARTIANI MADDARI. Sprin.Juk-66/b/24/09/2017 tanggal 13 September 2017. BP-59/23/09/2017 tanggal 08 September 2017.
6. Perkara TPK setiap orang yang secara bersama-sama memberi atau menjanjikan sesuatu kepada pegawai negeri atau penyelenggara negara dengan maksud supaya pegawai negeri atau penyelenggara negara tersebut berbuat atau tidak berbuat sesuatu dalam jabatannya, yang bertentangan dengan kewajibannya terkait dengan Pemeriksaan Badan Pemeriksa Keuangan Republik Indonesia (BPK-RI) atas Laporan Keuangan Kementerian Desa, Pembangunan Daerah Tertinggal dan Transmigrasi Tahun Anggaran 2016 atas nama terdakwa ROCHMADI SAPTOGIRI. Sprin.Juk-67/b/24/09/2017 tanggal 22 September 2017. BP-63/23/09/2017 tanggal 15 September 2017.
7. Perkara TPK penyelenggara negara yang secara bersama-sama menerima hadiah atau janji tersebut diberikan untuk menggerakkan agar melakukan atau tidak melakukan sesuatu dalam jabatannya yang bertentangan dengan kewajibannya terkait dengan Pemeriksaan Badan Pemeriksa Keuangan Republik Indonesia (BPK-RI) atas Laporan Keuangan Kementerian Desa, Pembangunan Daerah Tertinggal dan Transmigrasi Tahun Anggaran 2016 atas nama terdakwa ALI SADLI. Sprin.Juk-68/b/24/09/2017 tanggal 22 September 2017. BP-64/23/09/2017 tanggal 15 September 2017.
8. Perkara TPPU sehubungan dengan perbuatan setiap orang menempatkan, mentransfer, mengalihkan, membelanjakan, membayarkan, menghibahkan, menitipkan, membawa ke luar negeri, mengubah bentuk, menukarkan dengan mata uang atau surat berharga atau perbuatan

- lain atas harta kekayaan yang diketahuinya atau patut diduganya merupakan hasil tindak pidana dengan tujuan menyembunyikan atau menyamarkan asal usul harta kekayaan, yang diduga dilakukan oleh tersangka Ali Sadli selaku Sub Auditorat III.B2 Badan Pemeriksa Keuangan Republik Indonesia atas nama terdakwa ROCHMADI SAPTOGIRI. Sprin.Juk-69/b/24/09/2017 tanggal 22 September 2017. BP-65/23/09/2017 tanggal 15 September 2017.
9. Perkara TPPU sehubungan dengan perbuatan setiap orang menempatkan, mentransfer, mengalihkan, membelanjakan, membayarkan, menghibahkan, menitipkan, membawa ke luar negeri, mengubah bentuk, menukarkan dengan mata uang atau surat berharga atau perbuatan lain atas harta kekayaan yang diketahuinya atau patut diduganya merupakan hasil tindak pidana dengan tujuan menyembunyikan atau menyamarkan asal usul harta kekayaan atas nama terdakwa ALI SADLI. Sprin.Juk-70/b/24/09/2017 tanggal 22 September 2017. BP-66/23/09/2017 tanggal 15 September 2017.
10. Perkara TPK sehubungan dengan perbuatan turut serta memberi sesuatu kepada pegawai negeri atau penyelenggara negara Rudi Indra Prasetya selaku Kajari Pamekasan terkait kegiatan pengumpulan keterangan dan data atas dugaan penyelewengan Dana Desa di Desa Dasok Kecamatan Pademawu Kabupaten Pamekasan, bersama-sama dengan Achmad Syafii selaku Bupati Pamekasan, Sutjipto Utomo, dan Agus Mulyadi, atas nama terdakwa NOER SALEHHODDIN alias MARGONO. Sprin.Juk-71/b/24/09/2017 tanggal 25 September 2017. BP-60/23/09/2017 tanggal 13 September 2017.
11. Perkara TPK sehubungan dengan perbuatan turut serta memberi sesuatu kepada pegawai negeri atau penyelenggara negara Rudi Indra Prasetya selaku Kajari Pamekasan terkait kegiatan pengumpulan keterangan dan data atas dugaan penyelewengan Dana Desa di Desa Dasok Kecamatan Pademawu Kabupaten Pamekasan, bersama-sama dengan Noer Salehhoddin alias Margono atas nama terdakwa ACHMAD SYAFII. Sprin.Juk-72/b/24/09/2017 tanggal 25 September 2017. BP-62/23/09/2017 tanggal 15 September 2017.
12. Perkara TPK sehubungan dengan perbuatan turut serta memberi sesuatu kepada pegawai negeri atau penyelenggara negara Rudi Indra Prasetya selaku Kajari Pamekasan terkait kegiatan pengumpulan keterangan dan data atas dugaan penyelewengan Dana Desa di Desa Dasok Kecamatan Pademawu Kabupaten Pamekasan, bersama-sama dengan Achmad Syafii selaku Bupati Pamekasan dan Noer Salehhoddin alias Margono, atas nama terdakwa SUTJIPTO UTOMO dan AGUS MULYADI. Sprin.Juk-73/b/24/09/2017 tanggal 26 September 2017. BP-61/23/09/2017 tanggal 13 September 2017.
- 

## **Agustus**

1. Perkara TPK memberi hadiah atau janji terkait dengan fungsi pengawasan dan pemantauan oleh DPRD Provinsi Jawa Timur terhadap pelaksanaan peraturan daerah dan penggunaan anggaran di provinsi Jawa Timur tahun anggaran 2016 – 2017 atas nama tersangka BAMBANG



HERYANTO (Kadis Pertanian Provinsi Jawa Timur) dan ANANG BASUKI (PNS Dinas Pertanian Provinsi Jawa Timur). Sprin.Juk-58/b/24/08/2017 tanggal 03 Agustus 2017. BP-50/23/07/2017 tanggal 27 Juli 2017.

2. Perkara TPK memberi hadiah atau janji terkait dengan fungsi pengawasan dan pemantauan oleh DPRD Provinsi Jawa Timur terhadap pelaksanaan peraturan daerah dan penggunaan anggaran di provinsi jawa timur tahun anggaran 2016 – 2017 atas nama tersangka ROHAYATI (Kadis Peternakan Provinsi Jawa Timur) dkk. Sprin.Juk-57/b/24/08/2017 tanggal 03 Agustus 2017. BP-51/23/07/2017 tanggal 27 Juli 2017.
3. Perkara TPK memberi hadiah atau janji kepada Parlin Purba selaku Kepala Seksi III Intelejen Kejaksaan Tinggi Bengkulu dkk terkait dengan pengumpulan data atau bahan keterangan atas pelaksanaan proyek-proyek di Balai Wilayah Sungai Sumatera VII Provinsi Bengkulu Tahun Anggaran 2015 dan 2016 atas nama tersangka AMIN ANWARI (PPK Balai Wilayah Sungai Sumatera VIII) dan MURNI SUHARDI (swasta). Sprin.Juk-59/b/24/08/2017 tanggal 8 Agustus 2017. BP-53/23/08/2017 tanggal 2 Agustus 2017.
4. Perkara TPK menerima hadiah atau janji terkait Pembahasan Perubahan APBD pada Dinas Pekerjaan Umum dan Penataan Ruang Pemerintah Kota Mojokerto Tahun Anggaran 2017 atas nama tersangka WIWIET FEBRYANTO (Kepala Dinas Pekerjaan Umum dan Penataan Ruang Kota Mojokerto). Sprin.Juk-60/b/24/08/2017 tanggal 10 Agustus 2017. BP-52/23/08/2017 tanggal 2 Agustus 2017.
5. Perkara TPK memberi hadiah atau janji kepada Ridwan Mukti selaku Gubernur Provinsi Bengkulu periode 2016-2021 dan Lily Martiani Maddari terkait dengan proyek-proyek di Lingkungan Pemerintah Provinsi Bengkulu Tahun Anggaran 2017 atas nama tersangka JHONI WIJAYA (swasta). Sprin.Juk-61/b/24/08/2017 tanggal 16 Agustus 2017. BP-54/23/08/2017 tanggal 11 Agustus 2017.

---

## Juli

1. Perkara TPK atas nama terdakwa DUDUNG PURWADI sehubungan dengan dalam kegiatan pembangunan Wisma Atlet dan Gedung Serbaguna Pemerintah Provinsi Sumatera Selatan Tahun 2010 – 2011. Sprin.Juk-45/b/24/07/2017 tanggal 03 Juli 2017.
2. Perkara TPK dalam pekerjaan Pembangunan Rumah Sakit Pendidikan Khusus Penyakit Infeksi dan Pariwisata Universitas Udayana Tahun Anggaran 2009 s.d. 2011 atas nama tersangka DUDUNG PURWADI (Swasta). Sprin.Juk-46/b/24/07/2017 tanggal 03 Juli 2017.
3. Perkara TPK penerimaan hadiah atau janji terkait penerbitan paspor RI dengan metode Reach Out Tahun 2016 dan proses penerbitan calling visa tahun 2013 s.d. tahun 2016 atas nama tersangka DWI WIDODO (Penyidik Pegawai Negeri Sipil yang menjabat sebagai Atase Imigrasi pada Kedutaan Besar Republik Indonesia di Kuala Lumpur Malaysia). Sprin.Juk-47/b/24/07/2017 tanggal 18 Juli 2017. BP-40/23/06/2017 tanggal 10 Juli 2017.

4. Perkara TPK pengadaan Paket Penerapan Kartu Tanda Penduduk Berbasis Nomor Induk Kependudukan Secara Nasional (KTP Elektronik) Tahun 2011 s.d 2012 pada Kementerian Dalam negeri Republik Indonesia atas nama tersangka ANDI AGUSTINUS NAROGONG (Direktur PT. Cahaya Wijaya Kusuma - Swasta). Sprin.Juk-48/b/24/07/2017 tanggal 21 Juli 2017.
5. Perkara TPK setiap orang yang secara bersama-sama memberi atau menjanjikan sesuatu kepada pegawai negeri atau penyelenggara negara dengan maksud supaya pegawai negeri atau penyelenggara negara tersebut berbuat atau tidak berbuat sesuatu dalam jabatannya, yang bertentangan dengan kewajibannya terkait dengan Pemeriksaan Badan Pemeriksa Keuangan Republik Indonesia (BPK-RI) atas Laporan Keuangan Kementerian Desa, Pembangunan Daerah Tertinggal dan Transmigrasi Tahun Anggaran 2016 atas nama tersangka SUGITO (Inspektur Jenderal Kementrian Desa, Pembangunan Daerah Tertinggal dan Transmigrasi). Sprin.Juk-49/b/24/07/2017 tanggal 25 Juli 2017. BP-42/23/07/2017 tanggal 17 Juli 2017.
6. Perkara TPK setiap orang yang secara bersama-sama memberi atau menjanjikan sesuatu kepada pegawai negeri atau penyelenggara negara dengan maksud supaya pegawai negeri atau penyelenggara negara tersebut berbuat atau tidak berbuat sesuatu dalam jabatannya, yang bertentangan dengan kewajibannya terkait dengan Pemeriksaan Badan Pemeriksa Keuangan Republik Indonesia (BPK-RI) atas Laporan Keuangan Kementerian Desa, Pembangunan Daerah Tertinggal dan Transmigrasi Tahun Anggaran 2016 atas nama tersangka JAROT BUDI PRABOWO (Kepala Bagian TU dan Keuangan Itjen Kemendes PDTT). Sprin.Juk-50/b/24/07/2017 tanggal 25 Juli 2017. BP-43/23/07/2017 tanggal 17 Juli 2017.
7. Perkara TPK yaitu menerima hadiah atau janji terkait Penunjukan Ashanti Inc. sebagai agen eksklusif PT. PAL Indonesia (Persero) dalam Pengadaan Kapal SSV untuk Pemerintahan Filipina Tahun 2014 sd 2017 atas nama tersangka ARIF CAHYANA (Manager Keuangan PT. PAL Indonesia (Persero)). Sprin.Juk-51/b/24/07/2017 tanggal 27 Juli 2017. BP-44/23/07/2017 tanggal 17 Juli 2017.
8. Perkara TPK yaitu menerima hadiah atau janji terkait Penunjukan Ashanti Inc. sebagai agen eksklusif PT. PAL Indonesia (Persero) dalam Pengadaan Kapal SSV untuk Pemerintahan Filipina Tahun 2014 sd 2017 atas nama tersangka M. FIRMANSYAH ARIFIN (Direktur Utama PT. PAL Indonesia (Persero)). Sprin.Juk-52/b/24/07/2017 tanggal 27 Juli 2017. BP-45/23/07/2017 tanggal 17 Juli 2017.
9. Perkara TPK yaitu menerima hadiah atau janji terkait Penunjukan Ashanti Inc. sebagai agen eksklusif PT. PAL Indonesia (Persero) dalam Pengadaan Kapal SSV untuk Pemerintahan Filipina Tahun 2014 sd 2017 atas nama tersangka SAIFUL ANWAR (Direktur Keuangan PT. PAL Indonesia (Persero)). Sprin.Juk-53/b/24/07/2017 tanggal 27 Juli 2017. BP-46/23/07/2017 tanggal 17 Juli 2017.
10. Perkara TPK bersama-sama dengan Saiful Anwar selaku Direktur Design dan Teknologi merangkap Direktur Keuangan PT. PAL Indonesia (persero) dan M. Firmansyah Arifin selaku

Direktur Utama PT. PAL Indonesia (persero), yaitu menerima gratifikasi yang berhubungan dengan jabatannya dan yang berlawanan dengan kewenangan atau tugasnya atas nama tersangka ARIF CAHYANA (Kadiv Perbendaharaan PT. PAL Indonesia (persero)). Sprin.Juk-56/b/24/07/2017 tanggal 27 Juli 2017. BP-49/23/07/2017 tanggal 25 Juli 2017.

11. Perkara TPK bersama-sama dengan Saiful Anwar selaku Direktur Desain dan Teknologi merangkap Direktur Keuangan PT. PAL Indonesia (persero) dan Arif Cahyana selaku Kadiv Perbendaharaan PT. PAL Indonesia (persero), yaitu menerima gratifikasi yang berhubungan dengan jabatannya dan yang berlawanan dengan kewenangan atau tugasnya atas nama tersangka M. FIRMANSYAH ARIFIN (Direktur Utama PT. PAL Indonesia (persero)). Sprin.Juk-55/b/24/07/2017 tanggal 27 Juli 2017. BP-48/23/07/2017 tanggal 17 Juli 2017
12. Perkara TPK bersama-sama dengan M. Firmansyah Arifin selaku Direktur Utama PT. PAL Indonesia (persero) dan Arif Cahyana (Kadiv Perbendaharaan PT. PAL Indonesia (persero)), yaitu menerima gratifikasi yang berhubungan dengan jabatannya dan yang berlawanan dengan kewenangan atau tugasnya atas nama tersangka SAIFUL ANWAR (Direktur Design dan Teknologi merangkap Direktur Keuangan PT. PAL Indonesia (persero)). Sprin.Juk-54/b/24/07/2017 tanggal 27 Juli 2017. BP-47/23/07/2017 tanggal 17 Juli 2017.

---

## Juni

1. Perkara TPK atas nama terdakwa MUSA ZAINUDDIN sehubungan dengan menerima hadiah atau janji dari Abdul Khoir selaku Dirut PT. Windhu Tunggal Utama dan kawan-kawan untuk mendapatkan proyek di Kementerian Pekerjaan Umum dan Perumahan Rakyat TA 2016.
2. Perkara TPK atas nama terdakwa MIRYAM S. HARYANI sehubungan dengan yaitu dengan sengaja tidak memberikan keterangan atau memberikan keterangan yang tidak benar dalam persidangan perkara Tindak Pidana Korupsi atas nama terdakwa Irman dan Sugiharto pada pengadilan Tindak Pidana Korupsi pada Pengadilan Negeri Jakarta Pusat.
3. Perkara TPK atas nama terdakwa FAHD EL FOUZ sehubungan dengan menerima hadiah atau janji terkait dengan pengurusan anggaran dan atau pengadaan barang/jasa di Kementerian Agama RI T.A. 2011-2012 .

---

## Mei

1. Perkara TPK atas nama terdakwa BASUKI HARIMAN sehubungan dengan memberi atau menjanjikan sesuatu kepada Hakim Mahkamah Konstitusi terkait dengan permohonan Judicial Review UU No. 41 Tahun 2014 tentang Peternakan dan Kesehatan Hewan Nomor Register perkara 129/PUU-XIII/2015. Sprin.Dik-07/01/01/2017 Tanggal 26 Januari 2017. Nota Dinas Nomor: ND-157/23/05/2018 Tanggal 18 Mei 2017 Hal Penyerahan tanggung jawab tersangka

- BASUKI HARIMAN beserta Barang Bukti. Sprin.Juk-35/b/24/05/2017 tanggal 18 Mei 2017. BP-28/23/05/2017 tanggal 5 Mei 2017.
2. Perkara TPK atas nama terdakwa NG FENNY sehubungan dengan bersama-sama atau turut serta memberi atau menjanjikan sesuatu kepada Hakim Mahkamah Konstitusi terkait dengan permohonan Judicial Review UU No. 41 Tahun 2014 tentang Peternakan dan Kesehatan Hewan Nomor Register perkara 129/PUU-XIII/2015. Sprin.Juk-36/b/24/05/2017 tanggal 18 Mei 2017. BP-29/23/05/2017 tanggal 05 Mei 2017.
  3. Perkara TPK atas nama terdakwa SAMSU UMAR ABDUL SAMIUN ALIAS UMAR SAMIUN sehubungan dengan memberi atau menjanjikan sesuatu kepada hakim dengan maksud untuk mempengaruhi putusan perkara yang diserahkan kepadanya untuk diadili terkait dengan sengketa pemilihan kepada daerah Kabupaten Buton, Sulawesi Tenggara, di Mahkamah Konstitusi Tahun 2011/2012 kepada terpidana M. Akil Mochtar. Sprin.Juk-37/b/24/05/2017 tanggal 23 Mei 2017. BP-30/23/05/2017 tanggal 16 Mei 2017.
  4. Perkara TPK atas nama terdakwa PATRIALIS AKBAR sehubungan dengan menerima hadiah atau janji terkait dengan permohonan Judicial Review UU No. 41 Tahun 2014 tentang Peternakan dan Kesehatan Hewan Nomor Register perkara 129/PUU-XIII/2015 dari Basuki Hariman dkk. Sprin.Juk-38/b/24/05/2017 tanggal 23 Mei 2017. BP-32/23/05/2017 tanggal 17 Mei 2017.
  5. Perkara TPK atas nama terdakwa KAMALUDIN bersama-sama atau turut serta dengan Patrialis Akbar selaku Hakim Mahkamah Konstitusi menerima hadiah atau janji terkait dengan permohonan Judicial Review UU No. 41 Tahun 2014 tentang Peternakan dan Kesehatan Hewan Nomor Register perkara 129/PUU-XIII/2015 dari Basuki Hariman. Sprin.Juk-39/b/24/05/2017 tanggal 23 Mei 2017. BP-33/23/05/2017 tanggal 17 Mei 2017.
  6. Perkara TPK atas nama terdakwa AGUS NUGROHO sehubungan dengan yaitu memberi hadiah atau janji terkait Penunjukan Ashanti Inc. sebagai agen eksklusif PT. PAL Indonesia (Persero) dalam Pengadaan Kapal SSV untuk Pemerintahan Filipina Tahun 2014 sd 2017 kepada Arif Cahyana selaku Manager Keuangan PT. PAL Indonesia (Persero) bersama-sama dengan M. Firmansyah Arifin selaku Direktur Utama PT. PAL Indonesia (Persero) dan Saiful Anwar selaku Direktur Keuangan PT. PAL Indonesia (Persero). Sprin.Juk-40/b/24/05/2017 tanggal 29 Mei 2017. BP-31/23/05/2017 tanggal 17 Mei 2017.
  7. Perkara TPK atas nama terdakwa CHARLES JONES MESANG sehubungan dengan penerimaan hadiah atau janji secara bersama-sama terkait pembahasan Anggaran Optimalisasi pada Direktorat Jenderal Pembinaan Pembangunan Kawasan Transmigrasi (DitjenP2Ktrans), Kementerian Tenaga Kerja dan Transmigrasi RI Tahun Anggaran 2014. Sprin.Juk-41/b/24/05/2017 tanggal 30 Mei 2017. BP-34/23/05/2017 tanggal 23 Mei 2017.

1. Perkara TPK atas nama terdakwa SAIPUL JAMIL sehubungan dengan memberi atau menjanjikan sesuatu kepada pegawai negeri atau penyelenggara negara untuk pengurusan perkara nomor:454/Pidsus/2016/PN.Jkt.UTR pada Pengadilan Negeri Jakarta Utara. Sprin.Juk-29/b/24/04/2017 tanggal 7 April 2017. BP-15/23/03/2017 tanggal 6 April 2017.
2. Perkara TPK atas nama terdakwa EKO SUSILO HADI sehubungan dengan penyelenggara negara menerima hadiah atau janji padahal diketahui atau patut diduga bahwa hadiah atau janji tersebut diberikan untuk menggerakkan agar melakukan atau tidak melakukan sesuatu dalam jabatannya, yang bertentangan dengan kewajibannya terkait dengan Proses Pengadaan Satelit Monitoring di Bakamla RI pada APBN-P TA 2016. Sprin.Juk-30/b/24/04/2017 tanggal 12 April 2017. BP-23/23/04/2017 tanggal 13 April 2017.
3. Perkara TPK atas nama terdakwa MARISI MATONDANG sehubungan dengan Pengadaan Alat Kesehatan Rumah Sakit Khusus Pendidikan Penyakit Infeksi dan Pariwisata Universitas Udayana pada Tahun Anggaran 2009 berupa permufakatan dalam pengurusan anggaran, rekayasa dalam penyusunan dokumen lelang berupa daftar alat kesehatan dan spesifikasi teknis yang telah mengarah pada merk tertentu, rekayasa dalam penyusunan HPS, rekayasa dalam batas akhir pemasukan dokumen penawaran, rekayasa dalam melakukan evaluasi teknis dan rekayasa dalam pembuatan BAST. Sprin.Juk-31/b/24/04/2017 tanggal 17 April 2017. BP-17/23/03/2017 tanggal 13 April 2017.
4. Perkara TPK atas nama terdakwa ADI PANDoyo sehubungan dengan secara bersama-sama dengan Sigit Widodo dan Dian Lestari Subekti Pertiwi serta Yudhi Tri Hartanto yaitu menerima hadiah atau janji dari Basikun Suwandin Atmojo alias Petruk dan Hartoyo terkait pembahasan dan pengesahan anggaran proyek di Dinas Pendidikan dan Olah Raga (Dikpora) dalam APBD-P Kab. Kebumen TA 2016. Sprin.Juk-32/b/24/04/2017 tanggal 26 April 2017. BP-24/23/04/2017 tanggal 25 April 2017.
5. Perkara TPK atas nama terdakwa SO KOK SENG alias ASENS sehubungan dengan memberi atau menjanjikan sesuatu kepada pegawai negeri atau penyelenggara negara dengan maksud untuk mendapatkan persetujuan anggaran proyek-proyek di Direktorat Jenderal Bina Marga Kementerian Pekerjaan Umum dan Perumahan Rakyat Tahun Anggaran 2015 dan 2016. Sprin.Juk-33/b/24/04/2017 tanggal 28 April 2017. BP-26/23/04/2017 tanggal 27 April 2017.
6. Perkara TPK atas nama terdakwa SRI HARTINI sehubungan dengan penerimaan sesuatu oleh Penyelenggara Negara terkait pengisian jabatan di Pemerintah Kabupaten Klaten, Jawa Tengah Tahun 2016. Sprin.Juk-34/b/24/04/2017 tanggal 28 April 2017. BP-27/23/04/2017 tanggal 27 April 2017.

---

## **Maret**

1. Perkara TPK atas nama terdakwa XAVERIANDY SUTANTO sehubungan dengan setiap orang yang memberi atau menjanjikan sesuatu kepada penyelenggara dengan maksud supaya

penyelenggara negara tersebut berbuat atau tidak berbuat sesuatu dalam jabatannya yang bertentangan dengan kewajibannya terkait dengan pengurusan perkara nomor:

520/Pidsus/2016/PN.PDG Tanggal 2 Agustus 2016 di Pengadilan Negeri Padang. Sprin.Juk-19/b/24/03/2017 tanggal 01 Maret 2017.

2. Perkara TPK atas nama terdakwa MARTHEN DIRA TOME penyalahgunaan kewenangan dalam menggunakan dana Pendidikan Luar Sekolah pada Sub Dinas PLS Dinas Pendidikan dan Kebudayaan Provinsi Nusa Tenggara Timur Tahun Anggaran 2007. Sprin.Juk-21/b/24/03/2017 tanggal 13 Maret 2017.
  3. Perkara TPK atas nama terdakwa ANDI ZULKARNAIN ANWAR alias ANDI ZULKARNAIN MALLARANGENG alias CHOEL secara bersama-sama dengan Andi Alfian Mallarangeng selaku Menteri Pemuda dan Olahraga dan kawan-kawan terkait dengan proyek pembangunan/pengadaan/peningkatan sarana dan prasarana olahraga di Hambalang TA 2010-2012. Sprin.Juk-23/b/24/03/2017 tanggal 17 Maret 2017.
  4. Perkara TPK atas nama terdakwa BAMBANG IRIANTO yaitu baik langsung maupun tidak langsung dengan sengaja turut serta dalam pemborongan, pengadaan atau persewaan yang pada saat dilakukan perbuatan untuk seluruh atau sebagian ditugaskan untuk mengurus atau mengawasinya; atau menerima gratifikasi yang berhubungan dengan jabatannya yang berlawanan dengan kewajiban atau tugasnya; atau menerima hadiah atau janji padahal diketahui atau patut diduga diberikan karena kekuasaan atau kewenangan yang berhubungan dengan jabatan atau menurut pikiran orang yang memberikan ada hubungan dengan jabatannya terkait pembangunan Pasar Besar Kota Madiun Tahun 2009 – 2012. Sprin.Juk-24/b/24/03/2017 tanggal 21 Maret 2017.
  5. Perkara TPK atas nama terdakwa BAMBANG IRIANTO menerima gratifikasi yang berhubungan dengan jabatannya dan yang berlawanan dengan kewajiban atau tugasnya. Sprin.Juk-25/b/24/03/2017 tanggal 21 Maret 2017.
  6. Perkara TPPU atas nama terdakwa BAMBANG IRIANTO dalam hubungannya dengan perbuatan menempatkan, mentransfer, mengalihkan, membelanjakan, membayarkan, menghibahkan, menitipkan, membawa ke luar negeri, mengubah bentuk, menukarkan dengan mata uang atau surat berharga atau perbuatan lain atas harta kekayaan yang diketahuinya atau patut diduganya merupakan hasil TPK dengan tujuan menyembunyikan atau menyamarkan asal usul harta kekayaan. Sprin.Juk-26/b/24/03/2017 tanggal 21 Maret 2017.
  7. Perkara TPK atas nama terdakwa HANDANG SOEKARNO menerima hadiah atau janji yang dilakukan oleh pegawai negeri atau penyelenggara negara pada Direktorat Jenderal Pajak (DJP). Sprin.Juk-27/b/24/03/2017 tanggal 21 Maret 2017.
  8. Perkara TPK atas nama terdakwa ATTY SUHARTI dan ITOC TOCHIJA menerima hadiah atau janji dari Triswara Dhanu Brata alias Ade dan Hendriza Soleh Gunadi alias Ari terkait dengan pembangunan fisik Pasar Kota Cimahi tahun anggaran 2016 dan 2017. Sprin.Juk-28/b/24/03/2017 tanggal 31 Maret 2017.
-

1. Perkara TPK atas nama terdakwa YUDHY TRI HARTANTO dan SIGIT WIDODO menerima hadiah dari Hartoyo terkait pembahasan dan pengesahan Anggaran Dinas Pendidikan Kabupaten Kebumen dalam APBD-P Tahun 2016. Sprin.Juk-08/b/24/02/2017 tanggal 9 Februari 2017.
2. Perkara TPK atas nama terdakwa HARDY STEFANUS setiap orang yang secara bersama-sama memberi atau menjanjikan sesuatu kepada penyelenggara negara dengan maksud supaya penyelenggara negara tersebut berbuat atau tidak berbuat sesuatu dalam jabatannya, yang bertentangan dengan kewajibannya terkait dengan Proses Pengadaan Satelit Monitoring di Bakamla RI pada APBD-P TA 2016. Sprin.Juk-09/b/24/02/2017 tanggal 10 Februari 2017.
3. Perkara TPK atas nama terdakwa MUHAMMAD ADAMI OKTA setiap orang yang secara bersama-sama memberi atau menjanjikan sesuatu kepada penyelenggara negara dengan maksud supaya penyelenggara negara tersebut berbuat atau tidak berbuat sesuatu dalam jabatannya, yang bertentangan dengan kewajibannya terkait dengan Proses Pengadaan Satelit Monitoring di Bakamla RI pada APBN-P TA 2016. Sprin.Juk-10/b/24/02/2017 tanggal 10 Februari 2017.
4. Perkara TPK atas nama terdakwa SUGIHARTO sehubungan dengan pengadaan paket penerapan Kartu Tanda Penduduk Berbasis Nomor Induk Kependudukan Secara Nasional (KTP Elektronik) tahun 2011 s.d. 2012 pada Kementerian Dalam Negeri RI. Sprin.Juk-11/b/24/02/2017 tanggal 14 Februari 2017
5. Perkara TPK atas nama terdakwa IRMAN sehubungan dengan Pengadaan Paket Penerapan Kartu Tanda Penduduk Berbasis Nomor Induk Kependudukan Secara Nasional (KTP Elektronik) Tahun 2011 s.d. 2012 pada Kementerian Dalam Negeri Republik Indonesia. Sprin.Juk-12/b/24/02/2017 tanggal 14 Februari 2017.
6. Perkara TPK atas nama terdakwa RATU ATUT CHOSIYAH pengadaan sarana dan prasarana alat kesehatan dan pengadaan lainnya di lingkungan Pemerintah Provinsi Banten Tahun 2011 – 2013. Sprin.Juk-13/b/24/02/2017 tanggal 16 Februari 2017.
7. Perkara TPK atas nama terdakwa RATU ATUT CHOSIYAH yaitu pegawai negeri atau penyelenggara negara yang dengan maksud menguntungkan diri sendiri atau orang lain secara melawan hukum, atau dengan menyalahgunakan kekuasaannya memaksa seseorang memberikan sesuatu, membayar, dan atau menerima pembayaran dengan potongan, atau untuk mengerjakan sesuatu bagi dirinya sendiri; atau pegawai negeri atau penyelenggara negara yang menerima hadiah atau janji padahal diketahui atau patut diduga, bahwa hadiah atau janji tersebut diberikan untuk menggerakkan agar melakukan sesuatu atau disebabkan karena telah melakukan atau tidak melakukan sesuatu yang bertentangan dengan kewajibannya atau diberikan karena kekuasaan atau kewenangan yang berhubungan dengan jabatannya. Sprin.Juk-14/b/24/02/2017 tanggal 16 Februari 2017.
8. Perkara TPK atas nama terdakwa BAMBANG KURNIAWAN memberi atau menjanjikan sesuatu kepada pegawai negeri atau penyelenggara negara terkait dengan pengesahan anggaran

pendapatan dan belanja daerah Kabupaten Tanggamus Tahun Anggaran 2016. Sprin.Juk-15/b/24/02/2017 tanggal 17 Februari 2017.

9. Perkara TPK atas nama terdakwa FAHMI DARMAWANSYAH setiap orang yang secara bersama-sama memberi atau menjanjikan sesuatu kepada penyelenggara negara dengan maksud supaya penyelenggara negara tersebut berbuat atau tidak berbuat sesuatu dalam jabatannya, yang bertentangan dengan kewajibannya terkait dengan Proses Pengadaan Satelit Monitoring di Bakamla RI pada APBN-P TA 2016. Sprin.Juk-16/b/24/02/2017 tanggal 17 Februari 2017.
  10. Perkara TPK atas nama terdakwa BASIKUN SUWANDIN ATMOJO alias PETRUK memberi atau menjanjikan sesuatu kepada Dian Lestari Subekti Pertiwi, Yudhi Tri Hartanto dan Adi Pandoyo serta Sigit Widodo terkait pembahasan dan pengesahan anggaran proyek di Dinas Pendidikan dan Olah Raga (Dikpora) dalam APBD-P Kab. Kebumen TA 2016. Sprin.Juk-17/b/24/02/2017 tanggal 23 Februari 2017.
  11. Perkara TPK atas nama terdakwa SURAMLAN berupa penerimaan sesuatu oleh Penyelenggara Negara terkait pengisian jabatan di Pemerintah Kabupaten Klaten, Jawa Tengah Tahun 2016. Sprin.Juk-18/b/24/02/2017 tanggal 27 Februari 2017.
- 

## Januari

1. Perkara TPK atas nama terdakwa MULYA A HASJMY sehubungan dengan pelaksanaan pengadaan peralatan kesehatan dari sisa dana pelayanan kesehatan bagi penduduk miskin dalam rangka wabah flu burung (Avian Influenza) pada Dirjen Bina Pelayanan Medik Departemen Kesehatan dan dana APBN-P Sekretariat Dirjen Bina Pelayanan Medik Depkes TA 2006.
2. Perkara TPK atas nama terdakwa JEFFERSON SM RUMAJAR sehubungan dengan penggunaan dana kas daerah Pemerintah kota Tomohon TA 2009 dan 2010 dan Perkara TPK sehubungan dengan penerimaan hadiah atau pemberian berupa uang kepada pemeriksa Badan Pemeriksa Keuangan Sulawesi Utara pada tahun 2008 atas laporan keuangan Pemerintah Kota Tomohon TA.2007.
3. Perkara TPK atas nama terdakwa BAMBANG WIRATMADJI SOEHARTO sehubungan dengan bersama-sama Lusita Anie Razak, Subri dan Apriyanto Kurniawan, memberi atau menjanjikan sesuatu kepada pegawai negeri atau penyelenggara negara dengan maksud supaya pegawai negeri atau penyelenggara negara tersebut berbuat atau tidak berbuat sesuatu dalam jabatannya yang bertentangan dengan kewajibannya atau memberi sesuatu kepada pegawai negeri atau penyelenggara negara karena atau berhubungan dengan sesuatu yang bertentangan dengan kewajiban dilakukan atau tidak dilakukan dalam jabatannya terkait dengan pengurusan perkara tindak pidana menempatkan keterangan palsu di atas bukti autentik dan pemalsuan atas sertifikat tanah dengan terlapor Sugiharta Alias Along.



4. Perkara TPK atas nama terdakwa TEUKU SYAIFUL ACHMAD sehubungan dengan pelaksanaan proyek pembangunan dermaga bongkar pada kawasan perdagangan bebas dan pelabuhan bebas Sabang yang dibiayai Anggaran Pendapatan dan Belanja Negara (APBN) TA 2006 – 2010.
5. Perkara TPK atas nama terdakwa HENGKY WIDJAJA sehubungan dengan pelaksanaan Kerjasama Rehabilitasi, Kelola dan Transfer untuk Instalasi Pengolahan Air antara PDAM Kota Makassar dengan pihak swasta periode tahun 2006 – 2011.
6. Perkara TPK atas nama terdakwa DEWI ARYANILIZA ALS DEWIE YASIN LIMPO dan BAMBANG WAHYUHADI sehubungan dengan bersama-sama dengan Rinelda Bandaso, yaitu menerima hadiah atau janji terkait usulan penganggaran Proyek Pembangunan Infrastruktur Energi Baru dan Terbarukan TA 2016 untuk Kabupaten Deiyai Propinsi Papua.
7. Perkara TPK atas nama terdakwa BUDI SUPRIYANTO sehubungan dengan menerima hadiah atau janji dari Abdul Khoir terkait dengan pekerjaan di Kementerian Pekerjaan Umum dan Perumahan Rakyat Tahun Anggaran 2016.
8. Perkara TPK atas nama terdakwa MOHAMAD SANUSI sehubungan dengan menerima sesuatu hadiah atau janji secara berlanjut terkait dengan pembahasan Rancangan Peraturan Daerah tentang Rencana Zonasi Wilayah Pesisir dan Pulau Pulau kecil Provinsi DKI Jakarta Tahun 2015 – 2035 dan Rancangan Peraturan Daerah tentang Rencana Tata Ruang Kawasan Strategis Pantai Utara Jakarta.
9. Perkara TPPU atas nama terdakwa MOHAMAD SANUSI sehubungan dengan perbuatan menempatkan, mentransfer, mengalihkan, membelanjakan, membayarkan, menghibahkan, menitipkan, membawa ke luar negeri, mengubah bentuk, menukarkan dengan mata uang atau surat berharga atau perbuatan lain atas harta kekayaan yang diketahuinya atau patut diduganya merupakan hasil tindak pidana.
10. Perkara TPK atas nama terdakwa OJANG SOHANDI sehubungan dengan bersama-sama dengan Jajang Abdul Holik dan Lenih Marliani yaitu memberi hadiah atau janji kepada Fahri Nurmallo dan Deviyanti Rochaeni yang masing-masing sebagai Jaksa Penuntut Umum pada Kejaksaan Tinggi Jawa Barat, terkait penanganan perkara TPK Penyalahgunaan Anggaran dalam Pengelolaan Dana Kapitasi pada Program Jaminan Kesehatan Nasional di Dinas Kesehatan Kabupaten Subang Tahun Anggaran 2014.
11. Perkara TPK atas nama terdakwa OJANG SOHANDI sehubungan dengan menerima gratifikasi yang berhubungan dengan jabatannya dan yang berlawanan dengan kewajiban atau tugasnya.
12. Perkara TPPU atas nama terdakwa OJANG SOHANDI sehubungan dengan perbuatan menempatkan, mentransfer, mengalihkan, membelanjakan, membayarkan, menghibahkan, menitipkan, membawa ke luar negeri, mengubah bentuk, menukarkan dengan mata uang atau surat berharga atau perbuatan lain atas harta kekayaan yang diketahuinya atau patut diduganya merupakan hasil tindak pidana.

13. Perkara TPK atas nama terdakwa SITI MARWA sehubungan dengan menerima hadiah terkait dengan pengadaan atau pembelian pupuk di PT. Berdikari (Persero).
14. Perkara TPK atas nama terdakwa BADARUDDIN BACHSIN sehubungan dengan menerima pemberian hadiah atau janji sehubungan dengan perkara TPK terkait penyalahgunaan honor Dewan Pembina RSUD M.Yunus Bengkulu Tahun Anggaran 2011 yang sedang disidangkan di Pengadilan Tipikor Bengkulu atas nama terdakwa Edy Santoni dan terdakwa Safri.
15. Perkara TPK atas nama terdakwa AHMAD YANI sehubungan dengan secara bersama-sama memberi atau menjanjikan sesuatu kepada penyelenggara negara dengan maksud supaya penyelenggaraan negara tersebut berbuat atau tidak berbuat sesuatu dalam jabatannya yang bertentangan dengan kewajibannya terkait dengan putusan perkara perdata nomor: 503/PDT.G/2015/PN.JKT.PST antara PT. Mitra Maju Sukses (PT MMS) selaku penggugat dengan PT. Kapuas Tunggal Persada (PT. KTP) selaku tergugat di pengadilan negeri jakarta pusat.
16. Perkara TPK atas nama terdakwa EDISON MARUDUT MARDASAULI SIAHAAN sehubungan dengan memberi atau menjanjikan sesuatu kepada pegawai negeri atau penyelenggara negara dengan maksud supaya pegawai negeri atau penyelenggara negara tersebut berbuat atau tidak berbuat sesuatu dalam jabatannya, yang bertentangan dengan kewajibannya terkait dengan pengajuan revisi alih fungsi hutan di provinsi Riau tahun 2014 kepada kementerian kehutanan.
17. Perkara TPK atas nama terdakwa RAOUL ADHITYA WIRANATAKUSUMAH sehubungan dengan secara bersama-sama memberi atau menjanjikan sesuatu kepada penyelenggara negara dengan maksud supaya penyelenggaraan negara tersebut berbuat atau tidak berbuat sesuatu dalam jabatannya yang bertentangan dengan kewajibannya terkait dengan putusan perkara perdata nomor: 503/PDT.G/2015/PN.JKT.PST antara PT. Mitra Maju Sukses (PT MMS) selaku penggugat dengan PT. Kapuas Tunggal Persada (PT. KTP) selaku tergugat di pengadilan negeri jakarta pusat.
18. Perkara TPK atas nama terdakwa NOVIYANTI dan SUHEMI sehubungan dengan bersama-sama dengan I Putu Sudiartana selaku anggota DPR RI yaitu menerima hadiah atau janji dari Yogan Askan dan Suprpto terkait dengan pengelolaan anggaran di DPR untuk alokasi Provinsi Sumatera Barat Pada APBN-P tahun 2016.
19. Perkara TPK atas nama terdakwa ZULKIFLI EFFENDI SIREGAR sehubungan dengan menerima hadiah atau janji dari Gatot Pujo Nugroho selaku Gubernur Provinsi Sumatera Utara terkait fungsi dan kewenangan tersangka selaku anggota DPRD Provinsi Sumatera Utara Periode 2009 – 2014 dan periode 2014 – 2019.
20. Perkara TPK atas nama terdakwa PARLUHUTAN SIREGAR sehubungan dengan menerima hadiah atau janji dari Gatot Pujo Nugroho selaku Gubernur Provinsi Sumatera Utara terkait fungsi dan kewenangan tersangka selaku anggota DPRD Provinsi Sumatera Utara Periode 2009 – 2014 dan periode 2014 – 2019.

21. Perkara TPK atas nama terdakwa ZULKIFLI HUSEIN sehubungan dengan menerima hadiah atau janji dari Gatot Pujo Nugroho selaku Gubernur Provinsi Sumatera Utara terkait fungsi dan kewenangan tersangka selaku anggota DPRD Provinsi Sumatera Utara Periode 2009 – 2014 dan periode 2014 – 2019.
22. Perkara TPK atas nama terdakwa BUDIANTO HALIM WIDJAJA sehubungan dengan memberi hadiah atau janji kepada Pejabat di PT. Berdikari (Persero) terkait dengan pengadaan atau pembelian pupuk di PT. Berdikari (Persero).
23. Perkara TPK atas nama terdakwa BUDIMAN PARDAMEAN NADAPDAP sehubungan dengan menerima hadiah atau janji dari Gatot Pujo Nugroho selaku Gubernur Provinsi Sumatera Utara terkait fungsi dan kewenangan tersangka selaku anggota DPRD Provinsi Sumatera Utara Periode 2009 – 2014 dan periode 2014 – 2019.
24. Perkara TPK atas nama terdakwa GUNTUR MANURUNG sehubungan dengan menerima hadiah atau janji dari Gatot Pujo Nugroho selaku Gubernur Provinsi Sumatera Utara terkait fungsi dan kewenangan tersangka selaku anggota DPRD Provinsi Sumatera Utara Periode 2009 – 2014 dan periode 2014 – 2019.
25. Perkara TPK atas nama terdakwa MUHAMMAD AFAN sehubungan dengan menerima hadiah atau janji dari Gatot Pujo Nugroho selaku Gubernur Provinsi Sumatera Utara terkait fungsi dan kewenangan tersangka selaku anggota DPRD Provinsi Sumatera Utara Periode 2009 – 2014 dan periode 2014 – 2019.
26. Perkara TPK atas nama terdakwa BUSTAMI H. S. sehubungan dengan menerima hadiah atau janji dari Gatot Pujo Nugroho selaku Gubernur Provinsi Sumatera Utara terkait fungsi dan kewenangan tersangka selaku anggota DPRD Provinsi Sumatera Utara Periode 2009 – 2014 dan periode 2014 – 2019.
27. Perkara TPK atas nama terdakwa H. M. JOHAR dan SUPARMAN sehubungan dengan pegawai negeri atau penyelenggara negara yang bersama-sama menerima hadiah atau janji dengan maksud supaya pegawai negeri atau penyelenggara negara tersebut berbuat atau tidak berbuat sesuatu dalam jabatannya, yang bertentangan dengan kewajibannya terkait dengan Pembahasan RAPBD-P TA 2014 dan/atau RAPBD TA 2015 pada Provinsi Riau.
28. Perkara TPK atas nama terdakwa GATOT PUJO N sehubungan dengan memberi hadiah atau janji kepada anggota DPRD Provinsi Sumatera Utara periode 2009 s.d. 2014 dan 2014 s.d. 2019 terkait dengan: 1. Persetujuan laporan pertanggungjawaban Pemerintah Provinsi Sumatera Utara tahun anggaran 2012 s.d. 2014 oleh DPRD Provinsi Sumatera Utara; 2. Persetujuan perubahan anggaran pendapatan dan belanja daerah provinsi sumatera utara tahun anggaran 2013 dan 2014 oleh DPRD provinsi sumatera utara; 3. Pengesahan anggaran pendapatan dan belanja daerah provinsi sumatera utara tahun anggaran 2014 dan 2015 oleh DPRD provinsi sumatera utara; dan 4. Penolakan penggunaan hak interpelasi oleh DPRD provinsi sumatera utara pada tahun 2015.

29. Perkara TPK atas nama terdakwa ARIS HADIANTO sehubungan dengan memberi hadiah atau janji kepada pejabat di PT. Berdikari (Persero) terkait dengan pengadaan atau pembelian pupuk di PT. Berdikari (Persero).
30. Perkara TPK atas nama terdakwa MUHAMMAD SANTOSO sehubungan dengan secara bersama-sama memberi atau menjanjikan sesuatu kepada penyelenggara negara dengan maksud supaya penyelenggaraan negara tersebut berbuat atau tidak berbuat sesuatu dalam jabatannya yang bertentangan dengan kewajibannya terkait dengan putusan perkara perdata nomor: 503/PDT.G/2015/PN.JKT.PST antara PT. Mitra Maju Sukses (PT MMS) selaku penggugat dengan PT. Kapuas Tunggal Persada (PT. KTP) selaku tergugat di pengadilan negeri jakarta pusat.
31. Perkara TPK atas nama terdakwa SRI ASTUTI sehubungan dengan memberi hadiah atau janji kepada Pejabat di PT. Berdikari (Persero) terkait dengan pengadaan atau pembelian pupuk di PT. Berdikari (Persero).
32. Perkara TPK atas nama terdakwa I PUTU SUDIARTANA sehubungan dengan bersama-sama dengan Noviyanti dan Suhemi, yaitu menerima hadiah atau janji dari Yogan Askan dan Suprpto terkait dengan pengurusan anggaran di DPR untuk alokasi Provinsi Sumatera Barat Pada APBN-P tahun 2016.
33. Perkara TPK atas nama terdakwa XAVERIANDY SUTANTO dan MEMI sehubungan dengan setiap orang yang bersama-sama memberi atau menjanjikan sesuatu kepada penyelenggara dengan maksud supaya penyelenggara negara tersebut berbuat atau tidak berbuat sesuatu dalam jabatannya yang bertentangan dengan kewajibannya terkait dengan pengurusan kuota gula impor yang diberikan oleh Bulog kepada CV Semesta Berjaya di Tahun 2016.
34. Perkara TPK atas nama terdakwa IRMAN GUSMAN sehubungan dengan penyelenggara negara yang menerima hadiah atau janji padahal diketahui atau patut diduga bahwa hadiah atau janji tersebut diberikan untuk menggerakkan agar melakukan atau tidak melakukan sesuatu atau tidak berbuat sesuatu dalam jabatannya yang bertentangan dengan kewajibannya terkait dengan pengurusan kuota gula impor yang diberikan oleh Bulog kepada CV Semesta Berjaya di tahun 2016.
35. Perkara TPK atas nama terdakwa ZULFIKAR MUHARRAMI sehubungan dengan pemberian hadiah atau janji terkait dengan proses perencanaan, penganggaran dan pelaksanaan proyek pengadaan barang dan jasa di Dinas Pendidikan dan dinas-dinas lainnya di lingkungan Pemerintah Kabupaten Banyuasin.
36. Perkara TPK atas nama terdakwa AMRAN HI MUSTARY sehubungan dengan menerima hadiah atau janji dari Abdul Khoir guna mengupayakan Usulan Program Pembangunan Infrastruktur pada Kementerian Pekerjaan Umum dan Perumahan Rakyat di Maluku atau Maluku Utara serta menunjuk Abdul Khoir dan kawan-kawan sebagai pelaksananya.
37. Perkara TPK atas nama terdakwa YAN ANTON FERDIAN sehubungan dengan secara bersama-sama menerima hadiah atau janji terkait dengan proses perencanaan, penganggaran dan

pelaksanaan proyek pengadaan barang dan jasa di Dinas Pendidikan dan dinas-dinas lainnya di lingkungan Pemerintah Kabupaten Banyuasin.

38. Perkara TPK atas nama terdakwa RUSTAMI sehubungan dengan secara bersama-sama pegawai negeri atau penyelenggara negara menerima hadiah atau janji terkait dengan proses perencanaan, penganggaran dan pelaksanaan proyek pengadaan barang dan jasa di Dinas Pendidikan dan dinas-dinas lainnya di lingkungan Pemerintah Kabupaten Banyuasin.
39. Perkara TPK atas nama terdakwa KIRMAN sehubungan dengan secara bersama-sama pegawai negeri atau penyelenggara negara menerima hadiah atau janji terkait dengan proses perencanaan, penganggaran dan pelaksanaan proyek pengadaan barang dan jasa di Dinas Pendidikan dan dinas-dinas lainnya di lingkungan Pemerintah Kabupaten Banyuasin.
40. Perkara TPK atas nama terdakwa UMAR USMAN sehubungan dengan secara bersama-sama pegawai negeri atau penyelenggara negara menerima hadiah atau janji terkait dengan proses perencanaan, penganggaran dan pelaksanaan proyek pengadaan barang dan jasa di Dinas Pendidikan dan dinas-dinas lainnya di lingkungan Pemerintah Kabupaten Banyuasin.
41. Perkara TPK atas nama terdakwa SUTARYO sehubungan dengan secara bersama-sama pegawai negeri atau penyelenggara negara menerima hadiah atau janji terkait dengan proses perencanaan, penganggaran dan pelaksanaan proyek pengadaan barang dan jasa di Dinas Pendidikan dan dinas-dinas lainnya di lingkungan Pemerintah Kabupaten Banyuasin.
42. Perkara TPK atas nama terdakwa ANDI TAUFAN TIRO menerima hadiah atau janji dari Abdul Khoir selaku Direktur Utama PT. Windu Tunggal Utama terkait untuk mendapatkan pekerjaan di Kementerian Pekerjaan Umum dan Perumahan Rakyat Tahun Anggaran 2016. Sprin.Juk-01/b/24/01/2017 tanggal 3 Januari 2017.
43. Perkara TPK atas nama terdakwa SITI FADILAH SUPARI sehubungan dengan orang yang melakukan pembantuan terkait tindak pidana korupsi dalam pengadaan alat kesehatan untuk kebutuhan antisipasi Kejadian Luar Biasa (KLB) masalah kesehatan akibat bencana di Pusat Penanggulangan masalah Kesehatan pada Departemen Kesehatan Tahun Anggaran 2005 yang dilakukan oleh Mulya Hasjmy.
44. Perkara TPK atas nama terdakwa SITI FADILAH SUPARI sehubungan dengan menerima pemberian atau janji dalam kegiatan pengadaan alat kesehatan I untuk kebutuhan Pusat Penanggulangan Krisis Departemen Kesehatan dari dana DIPA revisi APBN Pusat Penanggulangan Krisis Sekretariat Jenderal Departemen Kesehatan Tahun Anggaran 2007. Sprin.Juk-02/b/24/01/2017 tanggal 3 Januari 2017.
45. Perkara TPK atas nama terdakwa FARIZAL setiap orang yang memberi atau menjanjikan sesuatu kepada penyelenggara dengan maksud supaya penyelenggara negara tersebut berbuat atau tidak berbuat sesuatu dalam jabatannya yang bertentangan dengan kewajibannya terkait dengan pengurusan perkara nomor: 520/Pidsus/2016/PN.PDG Tanggal 2 Agustus 2016 di Pengadilan Negeri Padang. Sprin.Juk-03/b/24/01/2017 tanggal 19 Januari 2017

46. Perkara TPK atas nama terdakwa RAMAPANICKER RAJAMOHANAN NAIR memberikan hadiah atau janji kepada pegawai negeri atau penyelenggara negara pada Direktorat Jenderal Pajak (DJP). Sprin.Juk-04/b/24/01/2017 tanggal 19 Januari 2017.
47. Perkara TPK atas nama terdakwa TRISWARA DHANU BRATA alias ADE dan HENDRIZA SOLEH GUNADI alias ARI memberi hadiah atau janji kepada Atty Suharti selaku Walikota Cimahi bersama H.M. Itoc Tochija, Ir. M.M. terkait dengan pembangunan fisik Pasar Kota Cimahi tahun anggaran 2016 dan 2017. Sprin.Juk-05/b/24/01/2017 tanggal 30 Januari 2017.

---

**Share :**

Bagikan 0

Tweet

## PENINDAKAN

Penyidikan (/id/berkas/penindakan/penyidikan)

Penuntutan (/id/berkas/penindakan/penuntutan)

Inkracht (/id/berkas/penindakan/inkracht)

Jejak Kasus (/id/jejak-kasus)





































---

**LINK**

[TENTANG ACCH \(/ID/TENTANG-ACCH\).](#)

**REDAKSI ACCH**

KOMISI PEMBERANTASAN KORUPSI  
JL. KUNINGAN PERSADA KAV. 4 JAKARTA 12950  
TELP: (021) 2557 8300 EXT. 8642

[DISCLAIMER \(/ID/DISCLAIMER\).](#)

EMAIL: [ACCH@KPK.GO.ID](mailto:ACCH@KPK.GO.ID)  
([MAILTO:ACCH@KPK.GO.ID](mailto:ACCH@KPK.GO.ID)).

[KETENTUAN \(/ID/KETENTUAN\).](#)

[SITEMAP \(/ID/SITEMAP\).](#)

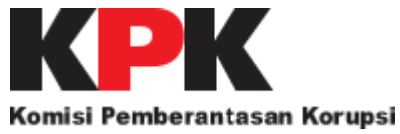

([HTTPS://WWW.ACCH.GO.ID/](https://www.acch.go.id/)).

COPYRIGHT © 2017 ANTI-CORRUPTION CLEARING HOUSE. ALL RIGHTS RESERVED
