# Supplementary material for: Democratization, leader education and growth: firm-level evidence from Indonesia
Source: Springer Nature journal article supplement (doi:10.1007/s10887-022-09221-5), 2023-02-15
Supplement: MOESM2 [file Penuntutan 2018.pdf › Data/Mayor-level corruption dataset (incl sources)/KPK Penuntutan 2011-/Penuntutan 2018.pdf]

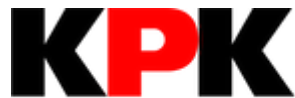

Komisi Pemberantasan Korupsi

[\(https://www.kpk.go.id/\)](https://www.kpk.go.id/)▼  Bahasa Indonesia

## Penuntutan

### Penuntutan 2018 (/id/publikasi/penanganan-perkara/penuntutan/735-penuntutan-2018)

 Penuntutan (/id/publikasi/penanganan-perkara/penuntutan)  22 Januari 2019

Kegiatan penuntutan (berdasarkan Berkas Perkara) dilaksanakan sebanyak 195 (seratus sembilanpuluh lima) perkara, yang terdiri dari perkara sisa tahun 2017 sebanyak 44 (empatpuluh empat) perkara dan perkara tahun 2018 sebanyak 151 (seratus limapuluh satu) perkara, yaitu:

#### Januari

1. Perkara TPK atas nama terdakwa SUGIHARTO sehubungan dengan Pengadaan Paket Penerapan Kartu Tanda Penduduk Berbasis Nomor Induk Kependudukan Secara Nasional (KTP Elektronik) Tahun 2011 s.d. 2012 pada Kementerian Dalam Negeri Republik Indonesia. BP-08/23/02/2017 tanggal 03 Februari 2017.
2. Perkara TPK atas nama terdakwa IRMAN sehubungan dengan Pengadaan Paket Penerapan Kartu Tanda Penduduk Berbasis Nomor Induk Kependudukan Secara Nasional (KTP Elektronik) Tahun 2011 s.d. 2012 pada Kementerian Dalam Negeri Republik Indonesia, bersama-sama dengan Ir. Sugiharto. MM selaku Pejabat Pembuat Komitmen (PPK) pada Direktorat Jenderal Kependudukan dan Pencatatan Sipil kementerian Dalam Negeri Republik Indonesia. BP-09/23/02/2017 tanggal 06 Februari 2017.
3. Perkara TPK atas nama terdakwa MARTHEN DIRA TOME sehubungan dengan penyalahgunaan kewenangan dalam menggunakan dana Pendidikan Luar Sekolah pada Sub Dinas PLS Dinas Pendidikan dan Kebudayaan Provinsi Nusa Tenggara Timur Tahun Anggaran 2007. BP-16/23/03/2017 tanggal 03 Maret 2017.
4. Perkara TPK atas nama terdakwa MIRYAM S. HARYANI sehubungan dengan sengaja tidak memberikan keterangan atau memberikan keterangan yang tidak benar dalam persidangan perkara Tindak Pidana Korupsi atas nama Terdakwa Irman dan Sugiharto pada pengadilan Tindak Pidana Korupsi pada Pengadilan Negeri Jakarta Pusat. BP-39/23/06/2017 tanggal 15 Juni 2017.
5. Perkara TPK atas nama terdakwa DUDUNG PURWADI sehubungan dengan dalam kegiatan pembangunan Wisma Atlet dan Gedung Serbaguna Pemerintah Provinsi Sumatera Selatan Tahun 2010 – 2011. BP-39/23/06/2017 tanggal 13 Juni 2017.
6. Perkara TPK atas nama terdakwa DUDUNG PURWADI dalam pekerjaan Pembangunan Rumah Sakit Pendidikan Khusus Penyakit Infeksi dan Pariwisata Universitas Udayana Tahun Anggaran 2009 s.d. 2011. BP-38/23/06/2017 tanggal 13 Juni 2017.

7. Perkara TPK atas nama terdakwa DWI WIDODO sehubungan dengan penerimaan hadiah atau janji terkait penerbitan paspor RI dengan metode Reach Out Tahun 2016 dan proses penerbitan calling visa tahun 2013 s.d. tahun 2016. BP-40/23/06/2017 tanggal 10 Juli 2017.
8. Perkara TPK pengadaan Paket Penerapan Kartu Tanda Penduduk Berbasis Nomor Induk Kependudukan Secara Nasional (KTP Elektronik) Tahun 2011 s.d 2012 pada Kementerian Dalam negeri Republik Indonesia atas nama terdakwa ANDI AGUSTINUS NAROGONG. BP-41/23/07/2017 tanggal 17 Juli 2017.
9. Perkara TPK atas nama terdakwa RIDWAN MUKTI dan LILY MARTIANI MADDARI menerima hadiah atau janji dari Jhony Wijaya dkk terkait proyek-proyek di Lingkungan Pemerintah Provinsi Bengkulu Tahun Anggaran 2017. BP-59/23/09/2017 tanggal 08 September 2017.
10. Perkara TPK atas nama terdakwa ROCHMADI SAPTOGIRI setiap orang yang secara bersama-sama memberi atau menjanjikan sesuatu kepada pegawai negeri atau penyelenggara negara dengan maksud supaya pegawai negeri atau penyelenggara negara tersebut berbuat atau tidak berbuat sesuatu dalam jabatannya, yang bertentangan dengan kewajibannya terkait dengan Pemeriksaan Badan Pemeriksa Keuangan Republik Indonesia (BPK-RI) atas Laporan Keuangan Kementerian Desa, Pembangunan Daerah Tertinggal dan Transmigrasi Tahun Anggaran 2016. BP-63/23/09/2017 tanggal 15 September 2017.
11. Perkara TPPU atas nama terdakwa ROCHMADI SAPTOGIRI sehubungan dengan perbuatan setiap orang menempatkan, mentransfer, mengalihkan, membelanjakan, membayarkan, menghibahkan, menitipkan, membawa ke luar negeri, mengubah bentuk, menukarkan dengan mata uang atau surat berharga atau perbuatan lain atas harta kekayaan yang diketahuinya atau patut diduganya merupakan hasil tindak pidana dengan tujuan menyembunyikan atau menyamarkan asal usul harta kekayaan, yang diduga dilakukan oleh tersangka Ali Sadli selaku Sub Auditorat III.B2 Badan Pemeriksa Keuangan Republik Indonesia. BP-65/23/09/2017 tanggal 15 September 2017.
12. Perkara TPK atas nama terdakwa ALI SADLI penyelenggara negara yang secara bersama-sama menerima hadiah atau janji tersebut diberikan untuk menggerakkan agar melakukan atau tidak melakukan sesuatu dalam jabatannya yang bertentangan dengan kewajibannya terkait dengan Pemeriksaan Badan Pemeriksa Keuangan Republik Indonesia (BPK-RI) atas Laporan Keuangan Kementerian Desa, Pembangunan Daerah Tertinggal dan Transmigrasi Tahun Anggaran 2016. BP-64/23/09/2017 tanggal 15 September 2017.
13. Perkara TPPU atas nama terdakwa ALI SADLI sehubungan dengan perbuatan setiap orang menempatkan, mentransfer, mengalihkan, membelanjakan, membayarkan, menghibahkan, menitipkan, membawa ke luar negeri, mengubah bentuk, menukarkan dengan mata uang atau surat berharga atau perbuatan lain atas harta kekayaan yang diketahuinya atau patut diduganya merupakan hasil tindak pidana dengan tujuan menyembunyikan atau menyamarkan asal usul harta kekayaan. BP-66/23/09/2017 tanggal 15 September 2017.
14. Perkara TPK atas nama terdakwa MOCHAMAD BASUKI, SANTOSO dan R. RAHMAN AGUNG sehubungan dengan memberi hadiah atau janji terkait dengan fungsi pengawasan dan pemantauan oleh DPRD Provinsi Jawa Timur terhadap pelaksanaan peraturan daerah dan penggunaan anggaran di provinsi jawa timur tahun anggaran 2016 – 2017 dan pengurusan Revisi Perda No. 3 Tahun 2012 tentang Pengendalian Ternak Sapi dan Kerbau Betina pada Dinas Peternakan Propinsi Jawa Timur. BP-67/23/09/2017 tanggal 19 September 2017.
15. Perkara TPK atas nama terdakwa PARLIN PURBA bersama-sama menerima hadiah atau janji terkait pengumpulan data atau bahan keterangan atas pelaksanaan proyek-proyek di balai Wilayah Sungai Sumatera VII Provinsi Bengkulu Tahun Anggaran 2015 dan 2016. BP-68/23/09/2017 tanggal 29 September 2017.
16. Perkara TPK atas nama terdakwa AKHMAD ZAINI bersama-sama dengan Ir. Yunus Nafik yaitu memberikan hadiah atau janji kepada Tarmizi selaku Panitera Pengganti pada Pengadilan Negeri

Jakarta Selatan terkait perkara perdata No. 688/Pdt.G/2016/PN. Jkt. Sel tentang Wanprestasi Kerjasama Pemasangan Rantai di kapal antara PT Eastern Jason Fabrication selaku Penggugat dengan PT Aquamarine Divindi Inspection selaku tergugat. BP-69/23/10/2017 tanggal 03 Oktober 2017.

17. Perkara TPK atas nama terdakwa YUNUS NAFIK bersama-sama dengan Akhmad Zaini, SH yaitu memberikan hadiah atau janji kepada TARMIZI selaku Panitera Pengganti pada Pengadilan Negeri Jakarta Selatan terkait perkara perdata No. 688/Pdt.G/2016/PN. Jkt. Sel tentang Wanprestasi Kerjasama Pemasangan Rantai di kapal antara PT Eastern Jason Fabrication selaku Penggugat dengan PT Aquamarine Divindi Inspection selaku tergugat. BP-70/23/10/2017 tanggal 03 Oktober 2017.
18. Perkara TPK atas nama terdakwa ADIPUTRA KURNIAWAN yaitu memberi hadiah atau janji terkait perizinan dan pengadaan proyek-proyek barang dan jasa di lingkungan Direktorat Jenderal Perhubungan Laut Tahun Anggaran 2016-2017. BP-73/23/10/2017 tanggal 13 Oktober 2017.
19. Perkara TPK atas nama terdakwa MOH KABIL MUBAROK yaitu menerima hadiah atau janji terkait fungsi pengawasan dan pemantauan oleh Dewan Perwakilan Rakyat Daerah Propinsi Jawa Timur Tahun Anggaran 2016 s.d 2017 yang diduga dilakukan oleh tersangka Moh Ka'bil Mubarak selaku anggota Dewan Perwakilan Rakyat Daerah Propinsi Jawa Timur. BP-71/23/10/2017 tanggal 10 Oktober 2017.
20. Perkara TPK atas nama terdakwa CAHYO SUPRIADI sehubungan dengan pemberian hadiah atau janji kepada Penyelenggara Negara terkait dengan Pengelolaan Dana Jasa Layanan RSUD Kardinah Kota Tegal Tahun 2017. BP-74/23/10/2017 tanggal 10 Oktober 2017.
21. Perkara TPK atas nama terdakwa NUR ALAM sehubungan dengan Persetujuan Pencadangan Wilayah Pertambangan, Persetujuan Izin Usaha Pertambangan (IUP) Ekplorasi dan Persetujuan Peningkatan Izin Usaha Pertambangan Eksplorasi menjadi Izin Usaha Pertambangan Operasi Produksi kepada PT. Anugrah Harisma Barakah di Wilayah Provinsi Sulawesi Tenggara Tahun 2008-2014. BP-77/23/10/2017 tanggal 24 Oktober 2017.
22. Perkara TPK atas nama terdakwa SYUHADATUL ISLAMY Alias LEMI sehubungan dengan memberi hadiah atau janji kepada Suryana selaku Anggota Majelis Hakim Pengadilan Tindak Pidana Korupsi pada Pengadilan Negeri Bengkulu bersama-sama dengan Hendra Kurniawan selaku Panitera Pengganti Pengadilan Tindak Pidana Korupsi pada Pengadilan Negeri Bengkulu dan kawan-kawan, yang diduga dilakukan oleh Tersangka dan kawan-kawan, sehubungan dengan persidangan perkara Tindak Pidana Korupsi Dana Kegiatan Rutin APBD Tahun Anggaran 2013 s.d 2014 di DPPKAD Kota Bengkulu atas nama Wilson, di Pengadilan Tindak Pidana Korupsi pada Pengadilan Negeri Bengkulu. BP-75/23/10/2017 tanggal 23 Oktober 2017.
23. Perkara TPK atas nama terdakwa SURYANA dan HENDRA KURNIAWAN sehubungan dengan menerima hadiah atau janji dari Syuhadatul Islamy Alias Lemi dan kawan-kawan terkait dengan persidangan perkara Tindak Pidana Korupsi Dana Kegiatan Rutin APBD Tahun Anggaran 2013 s.d 2014 di DPPKAD Kota Bengkulu atas nama Terdakwa Wilson, di Pengadilan Tindak Pidana Korupsi pada Pengadilan Negeri Bengkulu. BP-76/23/10/2017 tanggal 23 Oktober 2017.
24. Perkara TPK atas nama terdakwa FILIPUS DJAP berupa pemberian hadiah atau janji kepada Penyelenggara Negara terkait dengan Pengadaan Barang dan Jasa di lingkungan Pemerintah Kota Batu Tahun Anggaran 2017. BP-78/23/11/2017 tanggal 2 November 2017.
25. Perkara TPK atas nama terdakwa MUSLIH & TRENSIS yaitu memberi atau menjanjikan sesuatu dengan maksud supaya pegawai negeri atau penyelenggara negara tersebut berbuat atau tidak berbuat sesuatu dalam jabatannya atau karena berhubungan dengan sesuatu yang bertentangan dengan kewajibannya terkait dengan persetujuan Penetapan Peraturan Daerah tentang Penambahan Penyertaan Modal kepada Perusahaan Daerah Air Minum Bandarmasih tahun 2017. BP-79/23/11/2017 tanggal 3 November 2017.

26. Perkara TPK atas nama terdakwa MARINGAN SITUMORANG sehubungan dengan melakukan beberapa perbuatan memberi sesuatu kepada pegawai negeri atau penyelenggara negara Ok. Arya Zulkarnain selaku Bupati Batubara periode 2013 s.d 2018 dan Helman Herdady selaku Kadis PUPR Kabupaten Batubara dan Sujendi Tarsono Alias Ayen untuk mendapatkan proyek pembangunan jembatan Sentang Perbatasan Kel. Labuhan Ruku menuju Desa Sintang dan proyek Jembatan Se Magung Kecamatan. Medang Deras di Kabupaten Batubara Tahun Anggaran 2017. BP-81/23/11/2017 tanggal 6 November 2017.
27. Perkara TPK atas nama terdakwa SYAIFUL AZHAR sehubungan dengan memberi sesuatu kepada pegawai negeri atau penyelenggara negara Ok. Arya Zulkarnain selaku Bupati Batubara periode 2013 s.d 2018, Helman Herdady selaku Kadis PUPR Kabupaten Batubara dan Sujendi Tarsono Alias Ayrn karena telah mendapatkan proyek pekerjaan betonisasi Jalan di Kecamatan Talawi Kabupaten Batubara Tahun Anggaran 2017. BP-82/23/11/2017 tanggal 6 November 2017.
28. Perkara TPK atas nama terdakwa YUDI WIDIANA ADIA sehubungan dengan menerima hadiah atau janji dari So Kok Seng alias Aseng selaku Komisaris PT. Cahaya Mas Perkasa untuk mendapatkan proyek di Kementerian Pekerjaan Umum dan Perumahan Rakyat tahun anggaran 2015 dan tahun anggaran 2016. BP-80/23/11/2017 tanggal 3 November 2017
29. Perkara TPK atas nama terdakwa TUBAGUS DONY SUGIHMUKTI sehubungan dengan secara bersama-sama memberi atau menjanjikan sesuatu kepada pegawai negeri atau penyelenggara negara dengan maksud supaya pegawai negeri atau penyelenggara negara tersebut berbuat atau tidak berbuat sesuatu dalam jabatannya, yang bertentangan dengan kewajibannya terkait dengan Pengurusan Perizinan untuk Pembangunan Mall Transmart di Cilegon. BP-83/23/11/2017 tanggal 14 November 2017.
30. Perkara TPK atas nama terdakwa EKA WANDORO DAHLAN sehubungan dengan secara bersama-sama memberi atau menjanjikan sesuatu kepada pegawai negeri atau penyelenggara negara dengan maksud supaya pegawai negeri atau penyelenggara negara tersebut berbuat atau tidak berbuat sesuatu dalam jabatannya, yang bertentangan dengan kewajibannya terkait dengan Pengurusan Perizinan untuk Pembangunan Mall Transmart di Cilegon. BP-84/23/11/2017 tanggal 14 November 2017.
31. Perkara TPK atas nama terdakwa BAYU DWINANTO UTOMO sehubungan dengan secara bersama-sama memberi atau menjanjikan sesuatu kepada pegawai negeri atau penyelenggara negara dengan maksud supaya pegawai negeri atau penyelenggara negara tersebut berbuat atau tidak berbuat sesuatu dalam jabatannya, yang bertentangan dengan kewajibannya terkait dengan Pengurusan Perizinan untuk Pembangunan Mall Transmart di Cilegon. BP-85/23/11/2017 tanggal 14 November 2017.
32. Perkara TPK atas nama terdakwa ASEP SUDRAJAT SANUSI sehubungan dengan pengadaan pupuk urea tablet di Perum Perhutani unit 1 Jawa Tengah Tahun 2010 – 2011. BP-90/23/11/2017 tanggal 17 November 2017.
33. Perkara TPK atas nama terdakwa TEGUH HADI SISWANTO sehubungan dengan pengadaan pupuk urea tablet di Perum Perhutani unit 1 Jawa Tengah Tahun 2012 – 2013. BP-86/23/11/2017 tanggal 16 November 2017.
34. Perkara TPK atas nama terdakwa LIBRATO EL ARIF sehubungan dengan pengadaan pupuk urea tablet di Perum Perhutani unit 1 Jawa Tengah Tahun 2010 – 2011. BP-87/23/11/2017 tanggal 16 November 2017.
35. Perkara TPK atas nama terdakwa HERU SISWANTO sehubungan dengan pengadaan pupuk urea tablet di Perum Perhutani unit 1 Jawa Tengah Tahun 2010 – 2011. BP-92/23/11/2017 tanggal 23 November 2017.
36. Perkara TPK atas nama terdakwa BAMBANG WURYANTO sehubungan dengan pengadaan pupuk urea tablet di Perum Perhutani unit 1 Jawa Tengah Tahun 2010 – 2011. BP-93/23/11/2017 tanggal 23 November 2017.

37. Perkara TPK atas nama terdakwa SETYA NOVANTO sehubungan dengan Pengadaan Paket Penerapan Kartu Tanda Penduduk Berbasis Nomor Induk Kependudukan Secara Nasional (KTP Elektronik) Tahun 2011 s.d 2012 pada Kementerian Dalam Negeri Republik Indonesia, bersama-sama dengan Anang Sugiana Sudihardjo, Andi Agustinus alias Andi Narogong, Irman selaku Direktur Jenderal Kependudukan dan Pencatatan Sipil Kementerian Dalam Negeri Republik Indonesia dan Sugiharto selaku Pejabat Pembuat Komitmen (PPK) Direktorat Jenderal Kependudukan dan Pencatatan Sipil Kementerian Dalam Negeri Republik Indonesia dan kawan-kawan. BP-91/23/11/2017 tanggal 22 November 2017.
38. Perkara TPK atas nama terdakwa NOFEL HASAN sehubungan dengan Penyelenggara Negara yang bersama-sama dengan Eko Susilo Hadi dan Bambang Udoyo yaitu menerima hadiah atau janji tersebut diberikan untuk menggerakkan agar melakukan atau tidak melakukan sesuatu dalam jabatannya yang bertentangan dengan kewajibannya terkait dengan Proses Pengadaan Satelit Monitoring di Bakamla RI pada APBN-P TA 2016. BP-94/23/11/2017 tanggal 27 November 2017.
39. Perkara TPK atas nama terdakwa TARMIZI sehubungan dengan menerima hadiah atau janji dari Akhmad Zaini, SH selaku Kuasa Hukum PT AQUAMARINE DIVINDO INSPECTION bersama-sama dengan Ir. YUNUS NAFIK selaku Direktur Utama PT. AQUAMARINE DIVINDO INSPECTION terkait perkara perdata No. 688/Pdt.G/2016/PN. Jkt. Selatan tentang Wanprestasi Kerjasama Pemasangan Rantai di Kapal antara PT. EASTERN JASON FABRICATION selaku penggugat dengan PT AQUAMARINE DIVINDO INSPECTION selaku tergugat. BP-96/23/12/2017 tanggal 12 Desember 2017.
40. Perkara TPK atas nama terdakwa ANTONIUS TONNY BUDIONO sehubungan dengan menerima hadiah atau janji terkait perijinan dan pengadaan proyek-proyek barang dan jasa di lingkungan Direktorat Jenderal Perhubungan Laut Tahun Anggaran 2016-2017. BP-97/23/12/2017 tanggal 14 Desember 2017.
41. Perkara TPK atas nama terdakwa HARJANTO sehubungan dengan memberi hadiah atau janji kepada Taufiqurrahman selaku Bupati Nganjuk periode tahun 2013 – 2018 bersama-sama Ibnu Hajar selaku Kepala Dinas Pendidikan dan Kebudayaan Pemerintah Kabupaten Nganjuk dan Suwandi selaku Kepala SMP Negeri 3 Ngronggot Kabupaten Nganjuk terkait Mutasi dan Promosi Jabatan di lingkungan Pemerintah Kabupaten Nganjuk, yang diduga dilakukan. BP-98/23/12/2017 tanggal 15 Desember 2017.
42. Perkara TPK atas nama terdakwa MOKHAMMAD BISRI sehubungan dengan memberi hadiah atau janji kepada Taufiqurrahman selaku Bupati Nganjuk periode tahun 2013 – 2018 bersama-sama Ibnu Hajar selaku Kepala Dinas Pendidikan dan Kebudayaan Pemerintah Kabupaten Nganjuk dan Suwandi selaku Kepala SMP Negeri 3 Ngronggot Kabupaten Nganjuk terkait Mutasi dan Promosi Jabatan di lingkungan Pemerintah Kabupaten Nganjuk. BP-99/23/12/2017 tanggal 15 Desember 2017.
43. Perkara TPK atas nama terdakwa AMIR MIRZA HUTAGALUNG sehubungan dengan penerimaan hadiah atau janji bersama-sama dengan Siti Mashita Soeparno selaku Wali Kota Tegal dan kawan-kawan terkait dengan Pengelolaan Dana Jasa Pelayanan RSUD Kardinah Kota Tegal Tahun 2017 dan Pengadaan Barang dan Jasa di lingkungan Kota Tegal Tahun Anggaran 2017. BP-100/23/12/2017 tanggal 19 Desember 2017.
44. Perkara TPK atas nama terdakwa SITI MASHITA SOEPARNO sehubungan dengan penerimaan hadiah atau janji terkait dengan Pengelolaan Dana Jasa Pelayanan RSUD Kardinah Kota Tegal Tahun 2017 dan Pengadaan Barang dan Jasa di lingkungan Kota Tegal Tahun Anggaran 2017. BP-101/23/12/2017 tanggal 19 Desember 2017.
45. Perkara TPK atas nama terdakwa JAROT EDY SULISTİYONO sehubungan dengan memberi hadiah atau janji terkait Pembahasan APBD-P Pemerintah Kota Malang Tahun Anggaran 2015 kepada Moch. Arief Wicaksono selaku Ketua DPRD Kota Malang Periode 2014-2019. Sprin.Juk Nomor: 01/TUT.01.00/24/01/2018 tanggal 4 Januari 2018. BP-102/23/12/2017 tanggal 28 Desember 2017.

46. Perkara TPK atas nama terdakwa SUJENDI TARSONO Alias AYEN sehubungan dengan bersama sama dengan Ok. Arya Zulkarnain selaku Bupati Batubara periode 2013 s.d 2018 dan Helman Herdady selaku Kadis PUPR Kabupaten Batubara terkait penerimaan hadiah atau janji dari Maringan Situmorang untuk mendapatkan proyek pembangunan Jembatan Sentang Perbatasan Kel. Labuhan Ruku menuju Desa Sintang dan Proyek Jembatan Sei Magung Kecamatan Medang Deras di Kabupaten Batubara Tahun Anggaran 2017; dan dari Syaiful Azhar karena telah mendapatkan proyek pekerjaan betonisasi Jalan di Kecamatan Talawi Kabupaten Batubara Tahun Anggaran 2017. Sprin.Juk Nomor: 02/TUT.01.00/24/01/2018 tanggal 10 Januari 2018. BP/02/DIK.02.00/23/01/2018 tanggal 3 Januari 2018.
47. Perkara TPK atas nama terdakwa OK ARYA ZULKARNAIN sehubungan dengan bersama sama dengan Helman Herdady selaku Kadis PUPR Kabupaten Batubara dan Sujendi Tarsono alias Ayen terkait penerimaan hadiah atau janji dari Maringan Situmorang untuk mendapatkan proyek pembangunan Jembatan Sentang Perbatasan Kel. Labuhan Ruku menuju Desa Sintang dan Proyek Jembatan Sei Magung Kecamatan Medang Deras di Kabupaten Batubara Tahun Anggaran 2017; dan dari Syaiful Azhar karena telah mendapatkan proyek pekerjaan betonisasi Jalan di Kecamatan Talawi Kabupaten Batubara Tahun Anggaran 2017. Sprin.Juk Nomor: 03/TUT.01.00/24/01/2018 tanggal 10 Januari 2018. BP/03/DIK.02.00/23/01/2018 tanggal 3 Januari 2018.
48. Perkara TPK atas nama terdakwa HELMAN HERDADY sehubungan dengan bersama sama dengan Ok Arya zulkarnain selaku Bupati Batubara periode 2013 s.d 2018 dan Sujendi Tarsono alias Ayen terkait penerimaan hadiah atau janji dari Maringan Situmorang untuk mendapatkan proyek pembangunan Jembatan Sentang Perbatasan Kel. Labuhan Ruku menuju Desa Sintang dan Proyek Jembatan Sei Magung Kecamatan Medang Deras di Kabupaten Batubara Tahun Anggaran 2017; dan dari Syaiful Azhar karena telah mendapatkan proyek pekerjaan betonisasi Jalan di Kecamatan Talawi Kabupaten Batubara Tahun Anggaran 2017. Sprin.Juk Nomor: 04/TUT.01.00/24/01/2018 tanggal 10 Januari 2018. BP/01/DIK.02.00/23/01/2018 tanggal 03 Januari 2018.
49. Perkara TPK atas nama terdakwa SUWANDI sehubungan dengan menerima hadiah atau janji terkait Mutasi dan Promosi Jabatan di lingkungan Pemerintah Kabupaten Nganjuk, bersama-sama Taufiqurrahman selaku Bupati Nganjuk periode tahun 2013 – 2018 dan Ibnu Hajar selaku Kepala Dinas Pendidikan dan Kebudayaan Pemerintah Kabupaten Nganjuk. Sprin.Juk Nomor: 05/TUT.01.00/24/01/2018 tanggal 11 Januari 2018. BP-103/23/12/2017 tanggal 28 Desember 2017.
50. Perkara TPK atas nama terdakwa IWAN RUSMALI sehubungan dengan Perkara TPK sehubungan dengan menerima hadiah atau janji padahal diketahui atau patut diduga bahwa hadiah atau janji tersebut diberikan untuk menggerakkan agar melakukan atau tidak melakukan sesuatu dalam jabatannya atau karena telah melakukan atau tidak melakukan sesuatu dalam jabatannya, yang bertentangan dengan kewajibannya terkait dengan Persetujuan penetapan perarturan daerah tentang penambahan penyertaan modal kepada perusahaan daerah air minum Banjarmasin tahun 2017. Sprin.Juk Nomor: 06/TUT.01.00/24/01/2018 tanggal 11 Januari 2018. BP/04/DIK.02.00/23/01/2018 tanggal 4 Januari 2018.
51. Perkara TPK atas nama terdakwa ANDI EFFENDI sehubungan dengan menerima hadiah atau janji padahal diketahui atau patut diduga bahwa hadiah atau janji tersebut diberikan untuk menggerakkan agar melakukan atau tidak melakukan sesuatu dalam jabatannya atau karena telah melakukan atau tidak melakukan sesuatu dalam jabatannya, yang bertentangan dengan kewajibannya terkait dengan Persetujuan Penetapan Perarturan Daerah Tentang Penambahan Penyertaan Modal Kepada Perusahaan Daerah Air Minum Bandarmasih tahun 2017. Sprin.Juk Nomor: 07/TUT.01.00/24/01/2018 tanggal 11 Januari 2018. BP/05/DIK.02.00/23/01/2018 tanggal 4 Januari 2018.
52. Perkara TPK atas nama terdakwa IBNU HAJAR sehubungan dengan menerima hadiah atau janji terkait Mutasi dan Promosi Jabatan di lingkungan Pemerintah Kabupaten Nganjuk, bersama-sama

- Taufiqurrahman selaku Bupati Nganjuk periode tahun 2013 – 2018 dan Suwandi selaku Kepala SMP Negeri 3 Ngronggot Kabupaten Nganjuk. Sprin.Juk Nomor: 08/TUT.01.00/24/01/2018 tanggal 11 Januari 2018. BP-104/23/12/2017 tanggal 28 Desember 2017.
53. Perkara TPK atas nama terdakwa EDDY RUMPOKO sehubungan dengan penerimaan atau janji terkait dengan Pengadaan Barang dan Jasa di lingkungan Pemerintah Kota Batu Tahun Anggaran 2017. Sprin.Juk Nomor: 09/TUT.01.00/24/01/2018 tanggal 12 Januari 2018. BP/06/DIK.02.00/23/01/2018 tanggal 08 Januari 2018.
54. Perkara TPK atas nama terdakwa EDI SETIAWAN sehubungan dengan penerimaan hadiah atau janji bersama-sama dengan Eddy Rumpoko selaku Walikota Batu dan kawan-kawan, terkait dengan Pengadaan Barang dan Jasa di lingkungan Kota Batu Tahun Anggaran 2017. Sprin.Juk Nomor: 10/TUT.01.00/24/01/2018 tanggal 12 Januari 2018. BP/07/DIK.02.00/23/01/2018 tanggal 08 Januari 2018.
55. Perkara TPK atas nama terdakwa SIGIT YUGOHARTO sehubungan dengan menerima hadiah atau janji dari Setia Budi selaku General Manager PT Jasa Marga (Persero) padahal diketahui atau patut diduga bahwa hadiah atau janji tersebut diberikan untuk menggerakkan agar melakukan atau tidak melakukan sesuatu dalam jabatannya atau karena telah melakukan atau tidak melakukan sesuatu dalam jabatannya, yang bertentangan dengan kewajibannya terkait dengan Pemeriksaan Dengan Tujuan Tertentu (PDTT) terhadap PT Jasa Marga (Persero) pada tahun 2017. Sprin.Juk Nomor: 11/TUT.01.00/24/01/2018 tanggal 16 Januari 2018. BP/11/DIK.02.00/23/01/2018 tanggal 12 Januari 2018.
56. Perkara TPK atas nama terdakwa TUBAGUS IMAN ARIYADI sehubungan dengan menerima pemberian hadiah atau janji terkait dengan pengurusan perizinan pembangunan Mall Transmart di Cilegon. Sprin.Juk Nomor: 12/TUT.01.00/24/01/2018 tanggal 19 Januari 2018. BP/08/DIK.02.00/23/01/2018 tanggal 11 Januari 2018.
57. Perkara TPK atas nama terdakwa AKHMAD DITA PRAWIRA sehubungan dengan dengan turut serta atau bersama-sama dengan Tubagus Iman Ariyadi selaku Walikota Cilegon, menerima pemberian hadiah atau janji terkait dengan pengurusan perijinan pembangunan Mall Transmart di Cilegon. Sprin.Juk Nomor: 13/TUT.01.00/24/01/2018 tanggal 19 Januari 2018. BP/09/DIK.02.00/23/01/2018 tanggal 11 Januari 2018.
58. Perkara TPK atas nama terdakwa HENDRI sehubungan dengan turut serta atau bersama-sama dengan Tubagus Iman Ariyadi selaku Walikota Cilegon, menerima pemberian hadiah atau janji terkait dengan pengurusan perijinan pembangunan Mall Transmart di Cilegon. Sprin.Juk Nomor : 14/TUT.01.00/24/01/2018 tanggal 19 Januari 2018. BP/10/DIK.02.00/23/01/2018 tanggal 11 Januari 2018.
59. Perkara TPK atas nama terdakwa SAIPUDIN sehubungan dengan memberi atau menjanjikan sesuatu kepada pegawai negeri atau Penyelenggara Negara dengan maksud untuk mendapatkan Pengesahan RAPBD Propinsi Jambi Tahun Anggaran 2018. Sprin.Juk Nomor: 15/TUT.01.00/24/01/2018 tanggal 25 Januari 2018. BP/12/DIK.02.00/23/01/2018 tanggal 18 Januari 2018.
60. Perkara TPK atas nama terdakwa ERWAN MALIK sehubungan dengan memberi atau menjanjikan sesuatu kepada pegawai negeri atau Penyelenggara Negara dengan maksud untuk mendapatkan Pengesahan RAPBD Propinsi Jambi Tahun Anggaran 2018. Sprin.Juk Nomor: 16/TUT.01.00/24/01/2018 tanggal 25 Januari 2018. BP/13/DIK.02.00/23/01/2018 tanggal 19 Januari 2018.
61. Perkara TPK atas nama terdakwa ARFAN sehubungan dengan memberi atau menjanjikan sesuatu kepada pegawai negeri atau Penyelenggara Negara dengan maksud untuk mendapatkan Pengesahan RAPBD Propinsi Jambi Tahun Anggaran 2018. Sprin.Juk Nomor: 17/TUT.01.00/24/01/2018 tanggal 25 Januari 2018. BP/14/DIK.02.00/23/01/2018 tanggal 19 Januari 2018.

62. Perkara TPK atas nama terdakwa ADITYA ANUGRAH MOHA sehubungan dengan memberi hadiah atau janji kepada Sudiwardono selaku Hakim pada Pengadilan Tinggi Manado terkait Penanganan upaya hukum banding atas nama Terdakwa Marlina Moha Siahaan dalam perkara tindak pidana korupsi Tunjangan Penghasilan Aparatur Pemerintah Desa (TPAPD) Kabupaten Bolaang Mongondow tahun 2010. Sprin.Juk Nomor: 18/TUT.01.00/24/01/2018 tanggal 31 Januari 2018. BP/15/DIK.02.00/23/01/2018 tanggal 19 Januari 2018.
63. Perkara TPK atas nama terdakwa SUDIWARDONO sehubungan dengan menerima hadiah atau janji dari Aditya Anugrah Moha, terkait Penanganan upaya hukum banding atas nama Terdakwa Marlina Moha Siahaan dalam perkara tindak pidana korupsi Tunjangan Penghasilan Aparatur Pemerintah Desa (TPAPD) Kabupaten Bolaang Mongondow tahun 2010. Sprin.Juk Nomor: 19/TUT.01.00/24/01/2018 tanggal 31 Januari 2018. BP/16/DIK.02.00/23/01/2018 tanggal 19 Januari 2018.

## Februari

1. Perkara TPK atas nama terdakwa FREDRICH YUNADI Alias FREDY JUNADI bersama - sama dengan Bimanesh Sutarjo yaitu dengan sengaja mencegah, merintang, atau menggagalkan secara langsung atau tidak langsung penyidikan dugaan tindak pidana korupsi dalam pengadaan paket penerapan kartu tanda penduduk berbasis nomor induk kependudukan secara nasional (KTP Elektronik) Tahun 2011 s.d 21012 pada Kementerian Dalam Negeri Republik Indonesia dengan tersangka Setya Novanto. Sprin.juk Nomor 20/TUT.01.00/24/02/2018 tanggal 1 Februari 2018. BP/17/DIK.02.00/23/01/2018 tanggal 25 Januari 2018.
2. Perkara TPK atas nama terdakwa RITA WIDYASARI sehubungan dengan menerima hadiah atau janji dari Hery Susanto Gun selaku Direktur Utama PT Sawit Golden Prima terkait Pemberian Izin Lokasi untuk Keperluan Inti dan Plasma Perkebunan Kelapa Sawit di Desa Kupang Baru Kecamatan Muara Kaman kepada PT Sawit Golden Prima. Sprin.Dik-94/01/09/2017 tanggal 19 September 2017. Sprin.juk Nomor 21/TUT.01.00/24/02/2018 tanggal 1 Februari 2018. BP/18/DIK.02.00/23/01/2018 tanggal 25 Januari 2018.
3. Perkara TPK atas nama terdakwa KHAIRUDIN sehubungan dengan bersama-sama Rita Widyasari selaku Bupati Kutai Kartanegara periode tahun 2010–2015 dan periode 2016-2021, yaitu menerima gratifikasi yang berhubungan dengan jabatannya dan yang berlawanan dengan kewajiban atau tugasnya. Sprin.Juk Nomor 22/TUT.01.00/24/02/2018 tanggal 1 Februari 2018. BP/20/DIK.02.00/23/01/2018 tanggal 25 Januari 2018.
4. Perkara TPK atas nama terdakwa RITA WIDYASARI sehubungan dengan bersama-sama Khairudin selaku Komisaris PT Media Bangun Bersama, yaitu menerima gratifikasi yang berhubungan dengan jabatannya dan yang berlawanan dengan kewajiban atau tugasnya. Sprin.Juk Nomor 23/TUT.01.00/24/02/2018 tanggal 1 Februari 2018. BP/19/DIK.02.00/23/01/2018 tanggal 25 Januari 2018.
5. Perkara TPK atas nama terdakwa HERY SUSANTO GUN sehubungan dengan memberi hadiah atau janji kepada Rita Widyasari selaku Bupati Kutai Kartanegara periode tahun 2010–2015 terkait Pemberian Ijin Lokasi untuk Keperluan Inti dan Plasma Perkebunan Kelapa Sawit di Desa Kupang Baru Kecamatan Muara Kaman kepada PT Sawit Golden Prima. Sprin.Juk Nomor 24/TUT.01.00/24/02/2018 tanggal 15 Februari 2018. BP/23/DIK.02.00/23/02/2018 tanggal 12 Februari 2018.
6. Perkara TPK atas nama terdakwa TAUFIQURRAHMAN sehubungan dengan menerima hadiah atau janji terkait Mutasi dan Promosi Jabatan di lingkungan Pemerintah Kabupaten Nganjuk, bersama-sama Ibnu Hajar selaku Kepala Dinas Pendidikan dan Kebudayaan Pemerintah Kabupaten Nganjuk dan Suwandi selaku Kepala SMP Negeri 3 Ngronggot Kabupaten Nganjuk. Sprin.Juk Nomor 25/TUT.01.00/24/02/2018 tanggal 15 Februari 2018. BP/22/DIK.02.00/23/02/2018 tanggal 1 Februari 2018.



7. Perkara TPK atas nama Terdakwa BIMANESH SUTARJO bersama-sama dengan Fredrich Yunadi alias Fredy Junadi yaitu dengan sengaja mencegah, merintangi, atau menggagalkan sedara langsung atau tidak langsung penyidikan dugaan tindak pidana korupsi dalam Pengadaan Paket Penerapan Kartu Tanda Penduduk Berbasis Nomor Induk Kependudukan Secara Nasional ( KTP Elektronik ) Tahun 2011 s.d 2012 pada Kementerian Dalam Negeri Republik Indonesia dengan tersangka Setya Novanto. Sprin.Juk Nomor 26/TUT.01.00/24/02/2018 tanggal 20 Februari 2018. BP/21/DIK.02.00/23/01/2018 tanggal 29 Januari 2018.
8. Perkara TPK atas nama terdakwa MOCH. ARIEF WICAKSONO sehubungan dengan menerima hadiah atau janji terkait Pembahasan APBD-P Pemerintah Kota Malang Tahun Anggaran 2015 dari Dr. Ir. Drs. Jarot Edy Sulistiyono, M.Si. selaku Kepala Dinas Pekerjaan Umum Perumahan dan Pengawasan Bangunan (PUPPB) Pemerintah Kota Malang tahun 2015 dan kawan-kawan. Sprin.Juk Nomor 27/TUT.01.00/24/02/2018 tanggal 28 Februari 2018. BP/24/DIK.02.00/23/02/2018 tanggal 22 Februari 2018.
9. Perkara TPK atas nama terdakwa MOCH. ARIEF WICAKSONO sehubungan dengan menerima hadiah atau janji terkait penganggaran kembali proyek Pembangunan Jembatan Kedungkandang dalam APBD Pemerintah Kota Malang Tahun Anggaran 2016 pada tahun 2015 dari Hendrawan Maruszama selaku komisaris PT. Enfys Nusantara Karya. Sprin.Juk Nomor 28/TUT.01.00/24/03/2018 tanggal 28 Februari 2018. BP/26/DIK.02.00/23/02/2018 tanggal 26 Februari 2018.

## **Maret**

1. Perkara TPK atas nama terdakwa Ir. DONNY WITONO setiap orang yang memberi atau menjanjikan sesuatu kepada pegawai negeri atau penyelenggara negara dengan maksud supaya pegawai negeri atau penyelenggara negara tersebut berbuat atau tidak berbuat sesuatu dalam jabatannya, yang bertentangan dengan kewajibannya terkait dengan Pengadaan Pekerjaan Pembangunan Ruang Perawatan Kelas I, II, VIP, dan Super VIP di RSUD Damanhuri Barabai Kabupaten Hulu Sungai Tengah TA 2017. Sprin.Juk Nomor: 29/TUT.01.00/24/03/2018 tanggal 02 Maret 2018. BP/26/DIK.02.00/23/02/2018 tanggal 26 Februari 2018.
2. Perkara TPK atas nama terdakwa ANANG SUGIANA SUDIHARDJO sehubungan dengan pengadaan Paket Penerapan Kartu Tanda Penduduk Berbasis Nomor Induk Kependudukan Secara Nasional (KTP Elektronik) Tahun 2011 s.d 2012 pada Kementerian Dalam Negeri Republik Indonesia, bersama-sama dengan Setya Novanto, Andi Agustinus alias Andi Narogong, Irman selaku Direktur Jenderal Kependudukan dan Pencatatan Sipil Kementerian Dalam Negeri Republik Indonesia dan Sugiharto selaku Pejabat Pembuat Komitmen (PPK) Direktorat Jenderal Kependudukan dan Pencatatan Sipil Kementerian Dalam Negeri Republik Indonesia. Sprin.Juk Nomor: 30/TUT.01.00/24/03/2018 tanggal 07 Maret 2018. BP/27/DIK.02.00/23/03/2018 tanggal 05 Maret 2018.
3. Perkara TPK atas nama terdakwa SUPRIYONO sehubungan dengan menerima hadiah atau janji dari Saipudin selaku Asisten Daerah III Bidang Administrasi Umum Propinsi Jambi terkait untuk mendapatkan Pengesahan RAPBD Propinsi Jambi Tahun Anggaran 2018. Sprin.Juk Nomor: 32/TUT.01.00/24/03/2018 tanggal 26 Maret 2018. BP/28/DIK.02.00/23/03/2018 tanggal 08 Maret 2018.
4. Perkara TPK atas nama terdakwa HENDARWAN MARUSZAMA sehubungan memberi hadiah atau janji terkait penganggaran kembali proyek Pembangunan Jembatan Kedungkandang dalam APBD Pemerintah Kota Malang Tahun Anggaran 2016 pada Tahun 2015 kepada moch. Arief wicaksono, S.T selaku Ketua DPRD Kota Malang Periode 2014-2019. Sprin.Juk Nomor: 31/TUT.01.00/24/03/2018 tanggal 22 Maret 2018. BP/29/DIK.02.00/23/03/2018 tanggal 13 Maret 2018.

**April**

1. Perkara TPK atas nama terdakwa INNA SILESTYOWATI memberi sesuatu kepada pegawai negeri atau penyelenggara negara Nyono Suharli Wihandoko selaku Bupati Jombang periode 2013 s.d. 2018 terkait perizinan dan pengurusan penempatan jabatan di Pemerintahan Kabupaten Jombang. Sprin.Juk Nomor: 33/TUT.01.00/24/04/2018 tanggal 03 April 2018. BP/30/DIK.02.00/23/03/2018 tanggal 28 Maret 2018.
2. Perkara TPK atas nama terdakwa TAUFIK RAHMAN penyelenggara negara yang secara bersama-sama memberi hadiah atau janji padahal diketahui atau patut diduga bahwa hadiah atau janji tersebut diberikan untuk menggerakkan agar melakukan atau tidak melakukan sesuatu dalam jabatannya yang bertentangan dengan kewajibannya terkait dengan persetujuan penandatanganan surat pernyataan sebagai persyaratan jaminan pinjaman daerah kabupaten lampung tengah kepada PT Sarana Multi Infrastruktur. Sprin.Juk Nomor: 34/TUT.01.00/24/04/2018 tanggal 12 April 2018. BP/33/DIK.02.00/23/04/2018 tanggal 4 April 2018.
3. Perkara TPK atas nama terdakwa WILHELMUS IWAN ULUMBU alias BABA MIMING memberi hadiah atau janji terkait pengadaan barang dan jasa di lingkungan Kabupaten Ngada kepada Marianus Sae selaku Bupati Ngada periode tahun 2010 sampai dengan tahun 2015 dan periode tahun 2016 sampai dengan tahun 2021. Sprin.Juk Nomor: 35/TUT.01.00/24/04/2018 tanggal 12 April 2018. BP/34/DIK.02.00/23/04/2018 tanggal 5 April 2018.
4. Perkara TPK atas nama terdakwa MIFTAHUDIN memberi hadiah atau janji terkait perizinan PT Pura Binaka Mandiri dan PT Alfa Sentra Property kepada Imas Aryumningsih selaku Bupati Subang periode 2017-2018 dan Asep Santika selaku Kabid Perizinan DPMPSTP Kabupaten Subang dan Data alias Darti. Sprin.Juk Nomor: 36/TUT.01.00/24/04/2018 tanggal 13 April 2018. BP/32/DIK.02.00/23/04/2018 tanggal 02 April 2018.
5. Perkara TPK atas nama terdakwa MUSTAFA penyelenggara negara yang secara bersama-sama memberi hadiah atau janji padahal diketahui atau patut diduga bahwa hadiah atau janji tersebut diberikan untuk menggerakkan agar melakukan atau tidak melakukan sesuatu dalam jabatannya yang bertentangan dengan kewajibannya terkait dengan persetujuan penandatanganan surat pernyataan sebagai persyaratan jaminan pinjaman daerah kabupaten lampung tengah kepada PT Sarana Multi Infrastruktur. Sprin.Juk Nomor: 37/TUT.01.00/24/04/2018 tanggal 16 April 2018. BP/35/DIK.02.00/23/04/2018 tanggal 06 April 2018.
6. Perkara TPK atas nama terdakwa SYAFRUDDIN ARSYAD TUMENGGUNG dalam pemberian Surat Pemenuhan Kewajiban Pemegang Saham/ Surat Keterangan Lunas (SKL) kepada Sjamsul Nursalim selaku Pemegang Saham Pengendali Bank Dagang Negara Indonesia (BDNI) pada tahun 2004 sehubungan dengan pemenuhan kewajiban penyerahan aset oleh Obligor Bantuan Likuiditas Bank Indonesia (BLBI) kepada Badan Penyehatan Perbankan Nasional (BPPN). Sprin.Juk Nomor: 38/TUT.01.00/24/04/2018 tanggal 18 April 2018. BP/36/DIK.02.00/23/04/2018 tanggal 10 April 2018.
7. Perkara TPK atas nama terdakwa HASMUN HAMZAH memberi atau menjanjikan sesuatu kepada Adriatma Dwi Putra selaku Walikota Kendari Sulteng, Asrun dan Fatmawaty Faqih terkait pengadaan barang dan jasa di Lingkungan Pemerintah Kota Kendari Tahun Anggaran 2017-2018. Sprin.Juk Nomor : 39/TUT.01.00/24/04/2018 tanggal 27 April 2018. BP/37/DIK.02.00/23/04/2018 tanggal 20 April 2018.
8. Perkara TPK atas nama terdakwa H. FAUZAN RIFANI penyelenggara negara yang secara bersama-sama menerima hadiah atau janji padahal diketahui atau patut diduga bahwa hadiah atau janji tersebut diberikan untuk menggerakkan agar melakukan atau tidak melakukan sesuatu dalam jabatannya yang bertentangan dengan kewajibannya terkait dengan Pengadaan Pekerjaan Pembangunan Ruang Perawatan Kelas I, II, VIP, dan Super VIP di RSUD Damanhuri Barabai

Kabupaten Hulu Sungai Tengah TA 2017. Sprin.Juk Nomor: 40/TUT.01.00/24/04/2018 tanggal 27 April 2018. BP/38/DIK.02.00/23/04/2018 tanggal 24 April 2018.

9. Perkara TPK atas nama terdakwa ABDUL BASIT penyelenggara negara yang secara bersama-sama menerima hadiah atau janji padahal diketahui atau patut diduga bahwa hadiah atau janji tersebut diberikan untuk menggerakkan agar melakukan atau tidak melakukan sesuatu dalam jabatannya yang bertentangan dengan kewajibannya terkait dengan Pengadaan Pekerjaan Pembangunan Ruang Perawatan Kelas I, II, VIP, dan Super VIP di RSUD Damanhuri Barabai Kabupaten Hulu Sungai Tengah TA 2017. Sprin.Juk Nomor: 41/TUT.01.00/24/04/2018 tanggal 27 April 2018. BP/39/DIK.02.00/23/04/2018 tanggal 24 April 2018.

## Mei

1. Perkara TPK atas nama terdakwa H. ABDUL LATIF penyelenggara negara yang secara bersama-sama menerima hadiah atau janji padahal diketahui atau patut diduga bahwa hadiah atau janji tersebut diberikan untuk menggerakkan agar melakukan atau tidak melakukan sesuatu dalam jabatannya yang bertentangan dengan kewajibannya terkait dengan Pengadaan Pekerjaan Pembangunan Ruang Perawatan Kelas I, II, VIP, dan Super VIP di RSUD Damanhuri Barabai Kabupaten Hulu Sungai Tengah TA 2017. Sprin.Juk Nomor: 42/TUT.01.00/24/05/2018 tanggal 02 Mei 2018. BP/40/DIK.02.00/23/04/2018 tanggal 26 April 2018.
2. Perkara TPK atas nama Terdakwa KHAYUB MUHAMAD LUTFI yaitu memberi atau menjanjikan sesuatu kepada Mohammad Yahya Fuad selaku Bupati Kabupaten Kebumen periode 2016-2021 bersama sama dengan Hojin Ansori dengan maksud supaya pegawai negeri atau penyelenggara negara tersebut berbuat atau tidak berbuat sesuatu dalam jabatannya terkait dengan pengadaan barang dan jasa pada Anggaran Pendapatan dan Belanja Daerah ( APBD ) Kabupaten Kebumen TA 2016 dan Anggaran Pendapatan dan Belanja Negara Perubahan ( APBD Perubahan ) Kabupaten Kebumen TA 2016. Sprin.Juk Nomor : 43/TUT.01.00/24/05/2018 tanggal 09 Mei 2018. BP/41/DIK.02.00/23/04/2018 tanggal 30 April 2018.
3. Perkara TPK atas nama terdakwa WAHYU WIDYA NURFITRI bersama-sama Tuti Atika selaku Panitera Pengganti pada Pengadilan Negeri Klas IA Khusus Tangerang, yaitu menerima hadiah atau janji terkait putusan perkara yang diserahkan kepadanya untuk diadili dari HM. Saipudin dan Agus Wiratno selaku Advokat pada Kantor Hukum HM. Saipudin dan Jokusa & Associates. Sprin.Juk Nomor : 44/TUT.01.00/24/05/2018 tanggal 11 Mei 2018. BP/42/DIK.02.00/23/05/2018 tanggal 3 Mei 2018.
4. Perkara TPK atas nama terdakwa TUTI ATIKA bersama-sama Wahyu Widya Nurfitri selaku Hakim pada Pengadilan Negeri Klas IA Khusus Tangerang, yaitu menerima hadiah atau janji terkait putusan perkara yang diserahkan kepadanya untuk diadili dari HM. Saipudin dan Agus Wiratno selaku Advokat pada Kantor Hukum HM. Saipudin dan Jokusa & Associates. Sprin.Juk Nomor : 45/TUT.01.00/24/05/2018 tanggal 11 Mei 2018. BP/43/DIK.02.00/23/05/2018 tanggal 3 Mei 2018.
5. Perkara TPK atas nama terdakwa HM. SAIPUDIN bersama-sama Agus Wiratno selaku Advokat pada Kantor Hukum HM. Saipudin dan Jokusa & Associates yaitu memberi hadiah atau janji kepada Wahyu Widya Nurfitri selaku Hakim pada Pengadilan Negeri Klas IA Khusus Tangerang bersama-sama Tuti Atika selaku Panitera Pengganti pada Pengadilan Negeri Klas IA Khusus Tangerang terkait putusan perkara yang diserahkan kepadanya untuk diadili. Sprin.Juk Nomor: 46/TUT.01.00/24/05/2018 tanggal 11 Mei 2018. BP/44/DIK.02.00/23/05/2018 tanggal 3 Mei 2018.
6. Perkara TPK atas nama terdakwa AGUS WIRATNO memberi hadiah atau janji kepada Wahyu Widya Nurfitri selaku Hakim pada Pengadilan Negeri Klas IA Khusus Tangerang bersama-sama Tuti Atika selaku Panitera Pengganti pada Pengadilan Negeri Klas IA Khusus Tangerang terkait putusan perkara yang diserahkan kepadanya untuk diadili. Sprin.Juk Nomor: 47/TUT.01.00/24/05/2018 tanggal 11 Mei 2018. BP/45/DIK.02.00/23/05/2018 tanggal 3 Mei 2018.

7. Perkara TPK atas nama terdakwa H. MOCH. ANTON yaitu memberi hadiah atau janji terkait Pembahasan APBD-P Pemerintah Kota Malang Tahun Anggaran 2015 kepada Moch. Arief Wicaksono selaku Ketua DPRD Kota Malang Periode 2014-2019. Sprin.Juk Nomor : 48/TUT.01.00/24/05/2018 tanggal 24 Mei 2018. BP/46/DIK.02.00/23/05/2018 tanggal 17 Mei 2018.
8. Perkara TPK atas nama terdakwa RUDY ERAWAN pegawai negeri atau penyelenggara negara yang menerima hadiah atau janji padahal diketahui atau patut diduga, bahwa hadiah atau janji tersebut diberikan untuk menggerakkan agar melakukan sesuatu dalam jabatannya, yang bertentangan dengan kewajibannya atau bahwa hadiah atau janji tersebut diberikan sebagai akibat atau disebabkan karena telah melakukan atau tidak melakukan sesuatu dalam jabatannya, yang bertentangan dengan kewajibannya atau Penerimaan Gratifikasi atau Tindak Pidana Korupsi Pegawai negeri atau penyelenggara negara yang menerima hadiah atau janji padahal diketahui atau patut diduga, bahwa hadiah atau janji tersebut diberikan karena kekuasaan atau kewenangan yang berhubungan dengan jabatannya, atau yang menurut pikiran orang yang memberikan hadiah atau janji tersebut ada hubungan dengan jabatannya. Sprin.Juk Nomor: 49/TUT.01.00/24/05/2018 tanggal 25 Mei 2018. BP/47/DIK.02.00/23/05/2018 tanggal 17 Mei 2018.
9. Perkara TPK atas nama terdakwa NYONO SUHARLI WIHANDOKO menerima hadiah atau janji dari Inna Silestyowati dan kawan-kawan terkait perizinan dan pengurusan penempatan jabatan di Pemerintahan Kabupaten Jombang. Sprin.Juk Nomor: 50/TUT.01.00/24/05/2018 tanggal 30 Mei 2018. BP/51/DIK.02.00/23/05/2018 tanggal 23 Mei 2018.

## Juni

1. Perkara TPK atas nama terdakwa ASEP SANTIKA bersama-sama Imas Aryumningsih selaku Bupati Subang Periode 2017-2018 dan Data alias Darto, yaitu menerima hadiah atau janji terkait perizinan PT PURA BINAKA MANDIRI dan PT Alfa Sentra Property dari Miftahudin dan kawan-kawan. Sprin.Juk Nomor: 51/TUT.01.00/24/06/2018 tanggal 6 Juni 2018. BP/56/DIK.02.00/23/05/2018 tanggal 31 Mei 2018.
2. Perkara TPK atas nama terdakwa DIAN LESTARI SUBEKTI PERTIWI secara bersama-sama dengan Sigit Widodo dan Yudhy Tri Hartanto serta Adi Pandoyo menerima hadiah atau janji dari Basikun Suwandin Atmojo alias Petruk dan Hartoyo terkait pembahasan dan pengesahan anggaran proyek di Dinas Pendidikan dan Olahraga (Dikpora) dalam APBD-P Kabupaten Kebumen TA 2016. Sprin.Juk Nomor : 52/TUT.01.00/24/06/2018 tanggal 7 Juni 2018. BP/57/DIK.02.00/23/05/2018 tanggal 31 Mei 2018.
3. Perkara TPK atas nama terdakwa MARIANUS SAE menerima hadiah atau janji terkait pengadaan barang dan jasa di lingkungan Kabupaten Ngada. Sprin.Juk Nomor: 53/TUT.01.00/24/06/2018 tanggal 7 Juni 2018. BP/60/DIK.02.00/23/06/2018 tanggal 4 Juni 2018.
4. Perkara TPK atas nama terdakwa ASEP HIKAYAT berupa perbuatan memberi hadiah atau janji kepada Abubakar selaku Bupati Kabupaten Bandung Barat periode 2013-2018 bersama-sama dengan Tersangka Weti Lembanawati dan Tersangka Adiyoto mengingat kekuasaan atau wewenang yang melekat pada jabatan atau kedudukannya atau supaya berbuat atau tidak berbuat sesuatu dalam jabatannya yang bertentangan dengan kewajibannya atau berhubungan dengan sesuatu yang bertentangan dengan kewajiban, dilakukan atau tidak dilakukan dalam jabatannya. Sprin.Juk Nomor: 54/TUT.01.00/24/06/2018 tanggal 8 Juni 2018. BP/55/DIK.02.00/23/05/2018 tanggal 28 Mei 2018.
5. Perkara TPK atas nama terdakwa HOJIN ANSORI bersama-sama dengan Mohammad Yahya Fuad selaku Bupati Kabupaten Kebumen periode 2016-2021 yaitu menerima hadiah atau janji padahal diketahui atau patut diduga bahwa hadiah atau janji tersebut diberikan untuk menggerakkan agar melakukan atau tidak melakukan sesuatu dalam dalam jabatannya atau karena telah melakukan atau tidak melakukan sesuatu dalam jabatannya, yang bertentangan dengan kewajibannya terkait

- dengan pengadaan barang dan jasa pada Anggaran Pendapatan dan Belanja Daerah ( APBD ) Kabupaten Kebumen TA 2016 dan Anggaran Pendapatan dan Belanja Daerah Perubahan APBD Perubahan ) Kabupaten Kebumen TA 2016. Sprin.Juk Nomor: 55/TUT.01.00/24/06/2018 tanggal 8 Juni 2018. BP/58/DIK.02.00/23/05/2018 tanggal 31 Mei 2018.
6. Perkara TPK atas nama terdakwa MOHAMMAD YAHYA FUAD bersama-sama dengan Hojin Ansori yaitu menerima hadiah atau janji padahal diketahui atau patut diduga bahwa hadiah atau janji tersebut diberikan untuk menggerakkan agar melakukan atau tidak melakukan sesuatu dalam jabatannya, yang bertentangan dengan kewajibannya terkait dengan pengadaan barang dan jasa pada Anggaran Pendapatan dan Belanja Daerah (APBD) Kabupaten Kebumen TA 2016 dan Anggaran Pendapatan dan Belanja Daerah Perubahan (APBD Perubahan) Kabupaten Kebumen TA 2016. Sprin.Juk Nomor: 56/TUT.01.00/24/06/2018 tanggal 8 Juni 2018. BP/59/DIK.02.00/23/05/2018 tanggal 31 Mei 2018.
  7. Perkara TPK atas nama terdakwa IMAS ARYUMNINGSIH bersama-sama Asep Santika selaku Kabid Perizinan DPMPTSP Kabupaten Subang dan Data alias Dartta, yaitu menerima hadiah atau janji terkait perizinan PT PURA BINAKA MANDIRI dan PT ALFA SENTRA PROPERTY. Sprin.Juk Nomor: 57/TUT.01.00/24/06/2018 tanggal 8 Juni 2018. BP/48/DIK.02.00/23/05/2018 tanggal 18 Mei 2018.
  8. Perkara TPK atas nama terdakwa DATA alias DARTTA bersama-sama Imas Aryumningsih selaku Bupati Subang Periode 2017-2018 dan Asep Santika selaku Kabid Perizinan DPMPTSP Kabupaten Subang, yaitu menerima hadiah atau janji terkait perizinan PT PURA BINAKA MANDIRI dan PT ALFA SENTRA PROPERTY dari Miftahudin dan kawan-kawan. Sprin.Juk Nomor: 58/TUT.01.00/24/06/2018 tanggal 8 Juni 2018. BP/50/DIK.02.00/23/05/2018 tanggal 18 Mei 2018.
  9. Perkara TPK atas nama terdakwa NATALIS SINAGA penyelenggara negara yang secara bersama-sama menerima hadiah atau janji padahal diketahui atau patut diduga bahwa hadiah atau janji tersebut diberikan untuk menggerakkan agar melakukan atau tidak melakukan sesuatu dalam jabatannya yang bertentangan dengan kewajibannya terkait dengan persetujuan penandatanganan surat pernyataan sebagai persyaratan jaminan pinjaman daerah kabupaten lampung tengah kepada PT Sarana Multi Infrastruktur. Sprin.Juk Nomor: 59/TUT.01.00/24/06/2018 tanggal 8 Juni 2018. BP/53/DIK.02.00/23/05/2018 tanggal 28 Mei 2018.
  10. Perkara TPK atas nama terdakwa RUSLIYANTO penyelenggara negara yang secara bersama-sama menerima hadiah atau janji padahal diketahui atau patut diduga bahwa hadiah atau janji tersebut diberikan untuk menggerakkan agar melakukan atau tidak melakukan sesuatu dalam jabatannya yang bertentangan dengan kewajibannya terkait dengan persetujuan penandatanganan surat pernyataan sebagai persyaratan jaminan pinjaman daerah kabupaten lampung tengah kepada PT Sarana Multi Infrastruktur. Sprin.Juk Nomor: 60/TUT.01.00/24/06/2018 tanggal 8 Juni 2018. BP/54/DIK.02.00/23/05/2018 tanggal 28 Mei 2018.
  11. Perkara TPK atas nama terdakwa DUDY JOCOM dalam pengadaan dan pelaksanaan pekerjaan konstruksi Pembangunan Gedung Kampus Institut Pemerintahan Dalam Negeri (IPDN) Provinsi Sumatera Barat di Kabupaten Agam pada Kementerian Dalam Negeri RI Tahun Anggaran 2011. Sprin.Juk Nomor : 61/TUT.01.00/24/06/2018 tanggal 21 Juni 2018. BP/52/DIK.02.00/23/05/2018 tanggal 21 Mei 2018.
  12. Perkara TPK atas nama terdakwa ADRIATMA DWI PUTRA dan ASRUN bersama-sama Fatmawaty Faqih, yang menerima hadiah atau janji terkait pengadaan barang dan jasa di Lingkungan Pemerintah Kota Kendari Tahun Anggaran 2017-2018. Sprin.Juk Nomor: 62/TUT.01.00/24/06/2018 tanggal 26 Juni 2018. BP/61/DIK.02.00/23/05/2018 tanggal 25 Juni 2018.
  13. Perkara TPK atas nama terdakwa FATMAWATY FAQIH bersama-sama dengan Adriatma Dwi Putra selaku Walikota Kendari Sulteng dan Asrun, yang menerima hadiah atau janji terkait pengadaan barang dan jasa di Lingkungan Pemerintah Kota Kendari Tahun Anggaran 2017-2018. Sprin.Juk

Nomor: 63/TUT.01.00/24/06/2018 tanggal 26 Juni 2018. BP/62/DIK.02.00/23/06/2018 tanggal 5 Juni 2018.

## Juli

1. Perkara TPK atas nama terdakwa AHMAD GHIAST memberi atau menjanjikan sesuatu kepada Pegawai Negeri atau Penyelenggara Negara terkait usulan Dana Perimbangan Keuangan Daerah pada RAPBN-P Tahun Anggaran 2018. Sprin.Juk Nomor: 64/TUT.01.00/24/07/2018 tanggal 3 Juli 2018. BP/66/DIK.02.00/23/06/2018 tanggal 28 Juni 2018.
2. Perkara TPK atas nama terdakwa MAS'UD YUNUS sehubungan dengan memberi atau menjanjikan sesuatu terkait Pembahasan Perubahan APBD Pada Dinas Pekerjaan Umum dan Penataan Ruang Pemerintah Kota Mojokerto Tahun Anggaran 2017. Sprin.Juk Nomor: 64a/TUT.01.00/24/07/2018 tanggal 6 Juli 2018. BP/63/DIK.02.00/23/06/2018 tanggal 22 Juni 2018.
3. Perkara TPK atas nama terdakwa EKO MARDIYANTO dalam pengadaan fasilitasi sarana budidaya mendukung pengendalian OPT dalam rangka belanja barang fisik lainnya untuk diserahkan kepada masyarakat/Pemda di Kementerian Pertanian tahun anggaran 2013. Sprin.Juk Nomor : 65/TUT.01.00/24/07/2018 tanggal 6 Juli 2018. BP/64/DIK.02.00/23/06/2018 tanggal 25 Juni 2018.
4. Perkara TPK atas nama terdakwa SUTRISNO dalam pengadaan fasilitasi sarana budidaya mendukung pengendalian OPT dalam rangka belanja barang fisik lainnya untuk diserahkan kepada masyarakat/Pemda di Kementerian Pertanian tahun anggaran 2013. Sprin.Juk Nomor: 66/TUT.01.00/24/07/2018 tanggal 6 Juli 2018. BP/65/DIK.02.00/23/06/2018 tanggal 25 Juni 2018.
5. Perkara TPK atas nama terdakwa IRVANTO HENDRA PAMBUDI CAHYO Pengadaan Paket Penerapan Kartu Tanda Penduduk Berbasis Nomor Induk Kependudukan Secara Nasional (KTP Elektronik) Tahun 2011 s.d 2012 pada Kementerian Dalam Negeri Republik Indonesia, bersama sama dengan Setya Novanto, Anang Sugiana Sudihardjo Selaku Direktur Utama PT Quadra Solution anggota Konsorsium PNRI, Andi Agustinus alias Andi Narogong, Irman selaku Direktur Jenderal Kependudukan dan Pencatatan Sipil Kementerian Dalam Negeri Republik Indonesia dan Ir. Sugiharto, MM selaku Pejabat Pembuat Komitmen (PPK) Direktorat Jenderal Kependudukan dan Pencatatan Sipil Kementerian Dalam Negeri Republik Indonesia dan kawan-kawan. Sprin.Juk Nomor: 67/TUT.01.00/24/07/2018 tanggal 6 Juli 2018. BP/67/DIK.02.00/23/07/2018 tanggal 2 Juli 2018.
6. Perkara TPK atas nama terdakwa MADE OKA MASAGUNG Pengadaan Paket Penerapan Kartu Tanda Penduduk Berbasis Nomor Induk Kependudukan Secara Nasional (KTP Elektronik) Tahun 2011 s.d 2012 pada Kementerian Dalam Negeri Republik Indonesia, bersama sama dengan Setya Novanto, Anang Sugiana Sudihardjo Selaku Direktur Utama PT Quadra Solution anggota Konsorsium PNRI, Andi Agustinus alias Andi Narogong, Irman selaku Direktur Jenderal Kependudukan dan Pencatatan Sipil Kementerian Dalam Negeri Republik Indonesia dan Ir. Sugiharto, MM selaku Pejabat Pembuat Komitmen (PPK) Direktorat Jenderal Kependudukan dan Pencatatan Sipil Kementerian Dalam Negeri Republik Indonesia dan kawan-kawan. Sprin.Juk Nomor: 68/TUT.01.00/24/07/2018 tanggal 6 Juli 2018. BP/68/DIK.02.00/23/07/2018 tanggal 2 Juli 2018.
7. Perkara TPK atas nama terdakwa JUHARI Alias JUKAK penyidikan dugaan tindak pidana korupsi memberi hadiah atau janji kepada Dirwan alias Dirwan Mahmud selaku Bupati Bengkulu Selatan Periode 2016-2021, Hendrati dan Nursilawati, dalam rangka mendapatkan Proyek di Kabupaten Bengkulu Selatan Tahun Anggaran 2018. Nomor : 71/TUT.01.00/24/07/2018 tanggal 10 Juli 2018. BP/69/DIK.02.00/23/07/2018 tanggal 9 Juli 2018.
8. Perkara TPK atas nama terdakwa TONY KONGRES Alias ACUCU memberi hadiah atau janji kepada Agus Feisal Hidayat selaku Bupati Buton Selatan periode 2017-2022, terkait proyek pekerjaan di Pemda Kabupaten Buton Selatan. Sprin.Juk Nomor : 73/TUT.01.00/24/07/2018 tanggal 20 Juli 2018. BP/73/DIK.02.00/23/07/2018 tanggal 16 Juli 2018.

9. Perkara TPK atas nama terdakwa SULIK LESTYOWATI, SH,MH, ABD. HAKIM, BAMBANG SUMARTO, IMAM FAUZI, tersangka SYAIFUL RUSDI dan TRI YUDIANI menerima hadiah atau janji terkait Pembahasan APBD-P Pemerintah Kota Malang Tahun Anggaran 2015 dari H. Moch. Anton selaku Walikota Malang periode tahun 2013 s.d 2018 dan kawan-kawan. Sprin.Juk Nomor: 74/TUT.01.00/24/07/2018 tanggal 23 Juli 2018. BP-70/DIK.02.00/23/07/2018 tanggal 10 Juli 2018.
10. Perkara TPK atas nama terdakwa RAHAYU SUGIARTI, YA'QUD ANANDA GUDBAN, HERY SUBIANTONO, SUKARNO, HERI PUDJI UTAMI dan H. ABD. RACHMAN yaitu menerima hadiah atau janji terkait Pembahasan APBD-P Pemerintah Kota Malang Tahun Anggaran 2015 dari H. Moch. Anton selaku Walikota Malang periode tahun 2013 s.d 2018. Sprin.Juk Nomor: 75/TUT.01.00/24/07/2018 tanggal 23 Juli 2018. BP/71/DIK.02.00/23/07/2018 tanggal 10 Juli 2018.
11. Perkara TPK atas nama terdakwa SUPRAPTO, SAHRAWI, H. MOHAN KATELU, SALAMET, H.M. ZAINUDDIN AS dan WIWIK HENDRI ASTUTI menerima hadiah atau janji terkait Pembahasan APBD-P Pemerintah Kota Malang Tahun Anggaran 2015 dari H. Moch. Anton selaku Walikota Malang periode tahun 2013 s.d 2018. Nomor: 76/TUT.01.00/24/07/2018 tanggal 23 Juli 2018. BP-72/DIK.02.00/23/07/2018 tanggal 16 Juli 2018.
12. Perkara TPK atas nama terdakwa MADE MEREGAWA dalam Pekerjaan Pembangunan Rumah Sakit Pendidikan Khusus Penyakit Infeksi dan Pariwisata Universitas Udayana Tahun Anggaran 2009 s.d. 2011. Sprin.Juk Nomor: 77/TUT.01.00/24/07/2018 tanggal 23 Juli 2018. BP-31/DIK.02.00/23/01/2018 tanggal 02 April 2018.
13. Perkara TPK atas nama terdakwa FAYAKHUN ANDRIADI penyelenggara negara yang bersama-sama menerima hadiah atau janji padahal diketahui atau patut diduga bahwa hadiah atau janji tersebut diberikan untuk menggerakkan agar melakukan atau tidak melakukan sesuatu dalam jabatannya yang bertentangan dengan kewajibannya terkait dengan Proses Pembahasan dan Pengesahan RKA-K/L dalam APBN-P TA 2016 yang akan diberikan kepada Bakamla RI. Sprin.Juk Nomor: 78/TUT.01.00/24/07/2018 tanggal 24 Juli 2018. BP/74/DIK.02.00/23/07/2018 tanggal 20 Juli 2018.
14. Perkara TPK atas nama terdakwa LIBRATA NABABAN dan ARDIRAWINATA NABABAN memberi hadiah atau janji kepada Tasdi selaku Bupati Purbalingga periode tahun 2016 sampai dengan tahun 2021 terkait pengadaan barang dan jasa di lingkungan Pemerintah Kabupaten Purbalingga. Sprin.Juk Nomor: 79/TUT.01.00/24/07/2018 tanggal 30 Juli 2018. BP-75/DIK.02.00/23/07/2018 tanggal 25 Juli 2018.
15. Perkara TPK atas nama terdakwa HAMDANI KOSEN memberi hadiah atau janji kepada Tasdi selaku Bupati Purbalingga periode tahun 2016 sampai dengan tahun 2021 terkait pengadaan barang dan jasa di lingkungan Pemerintah Kabupaten Purbalingga. Sprin.Juk Nomor: 80/TUT.01.00/24/07/2018 tanggal 30 Juli 2018. BP-76/DIK.02.00/23/07/2018 tanggal 25 Juli 2018.
16. Perkara TPK atas nama terdakwa HADI ISWANTO bersama-sama dengan Tasdi selaku Bupati Purbalingga periode tahun 2016 sampai dengan tahun 2021 menerima hadiah atau janji terkait pengadaan barang dan jasa di lingkungan Pemerintah Kabupaten Purbalingga serta penerimaan lainnya. Sprin.Juk Nomor: 81/TUT.01.00/24/07/2018 tanggal 30 Juli 2018. BP-77/DIK.02.00/23/07/2018 tanggal 25. Juli 2018

## Agustus

1. Perkara TPK atas nama terdakwa WETI LEMBANAWATI dan ADIYOTO berupa perbuatan menerima hadiah atau janji dari Asep Hikayat dan kawan-kawan, bersama-sama dengan Tersangka Abubakar selaku Bupati Kabupaten Bandung Barat periode 2013-2018 padahal diketahui atau patut diduga, bahwa hadiah atau janji tersebut diberikan karena kekuasaan atau kewenangan yang berhubungan dengan jabatannya atau diberikan untuk menggerakkan agar melakukan atau tidak melakukan sesuatu dalam jabatannya, atau disebabkan karena telah melakukan atau tidak melakukan sesuatu

dalam jabatannya. Sprin.Juk Nomor: 82/TUT.01.00/24/08/2018 tanggal 3 Agustus 2018. BP/82/DIK.02.00/23/07/2018 tanggal 31 Juli 2018.

2. Perkara TPK atas nama terdakwa ABUBAKAR berupa perbuatan menerima hadiah atau janji dari Asep Hikayat dan kawan-kawan, bersama-sama dengan Tersangka Weti Lembanawati dan Tersangka Adiyoto padahal diketahui atau patut diduga, bahwa hadiah atau janji tersebut diberikan karena kekuasaan atau kewenangan yang berhubungan dengan jabatannya atau diberikan untuk menggerakkan agar melakukan atau tidak melakukan sesuatu dalam jabatannya, atau disebabkan karena telah melakukan atau tidak melakukan sesuatu dalam jabatannya. Sprin.Juk Nomor : 83/TUT.01.00/24/08/2018 tanggal 3 Agustus 2018. BP/83/DIK.02.00/23/07/2018 tanggal 31 Juli 2018.
3. Perkara TPK atas nama terdakwa SUSILO PRABOWO Alias EMBUN memberi hadiah atau janji kepada Syahri Mjulyo selaku Bupati Tulungagung periode 2013-2018 dan kawan-kawan, terkait proyek pekerjaan di Pemda Kabupaten Tulungagung dan memberi hadiah atau janji kepada Muh. Samanhudi Anwar selaku Walikota Blitar periode 2016-2021 dan Bambang Purnomo, terkait proyek pekerjaan di Pemda Kota Blitar. Sprin.Juk Nomor: 84/TUT.01.00/24/08/2018 tanggal 3 Agustus 2018. BP/81/DIK.02.00/23/07/2018 tanggal 25 Juli 2018.
4. Perkara TPK atas nama terdakwa ZUMI ZOLA ZULKIFLI memberi dan menjanjikan sesuatu kepada pegawai negeri atau penyelenggara negara dengan maksud untuk mendapatkan pengesahan RAPBD Provinsi Jambi Tahun Anggaran 2017 dan 2018. Sprin.Juk Nomor: 85/TUT.01.00/24/08/2018 tanggal 6 Agustus 2018. BP/78/DIK.02.00/23/07/2018 tanggal 25 Juli 2018.
5. Perkara TPK atas nama terdakwa ZUMI ZOLA ZULKIFLI meneria hadiah atau janji terkait proyek-proyek di Provinsi Jambi dan Penerimaan lainnya. Sprin.Juk Nomor: 85/TUT.01.00/24/08/2018 tanggal 6 Agustus 2018. BP/78/DIK.02.00/23/07/2018 tanggal 25 Juli 2018.
6. Perkara TPK atas nama terdakwa MUSTOFA KAMAL PASA berupa Penerimaan Hadiah atau Janji yang diberikan oleh Ockyanto selaku Permit and Regulatory Division Head PT. Tower Bersama Infrastructure (Tower Bersama Group) dan Onggo Wijaya selaku Direktur Operasi PT. Profesional Telekomunikasi Indonesia (Protelindo) terkait dengan Pengurusan Izin Prinsip Pemanfaatan Ruang (IPPR) dan Izin Mendirikan Bangunan (IMB) atas Pembangunan Menara Telekomunikasi di Kabupaten Mojokerto Tahun 2015. Sprin.Juk Nomor: 87/TUT.01.00/24/08/2018 tanggal 20 Agustus 2018. BP/84/DIK.02.00/23/08/2018 tanggal 13 Agustus 2018.
7. Perkara TPK atas nama terdakwa DIRWAN Alias DIRWAN MAHMUD menerima hadiah atau janji terkait proyek di Kabupaten Bengkulu Selatan. Sprin.Juk Nomor: 88/TUT.01.00/24/08/2018 tanggal 28 Agustus 2018. BP/85/DIK.02.00/23/08/2018 tanggal 20 Agustus 2018.
8. Perkara TPK atas nama terdakwa HENDRATI bersama-sama dengan Dirwan alias Dirwan Mahmud selaku Bupati Bengkulu Selatan menerima hadiah atau janji dari Juhari alias Jukak terkait proyek di Kabupaten Bengkulu Selatan. Sprin.Juk Nomor : 89/TUT.01.00/24/08/2018 tanggal 28 Agustus 2018. BP/86/DIK.02.00/23/08/2018 tanggal 20 Agustus 2018.
9. Perkara TPK atas nama terdakwa NURSILAWATI bersama-sama dengan Dirwan alias Dirwan Mahmud selaku Bupati Bengkulu Selatan menerima hadiah atau janji dari Juhari alias Jukak terkait proyek di Kabupaten Bengkulu Selata. Sprin.Juk Nomor: 90/TUT.01.00/24/08/2018 tanggal 28 Agustus 2018. BP/87/DIK.02.00/23/08/2018 tanggal 20 Agustus 2018.
10. Perkara TPK atas nama terdakwa H. AMIN SANTONO Penerimaan Hadiah atau Janji yang dilakukan oleh Tersangka H. Amin Santono selaku Anggota Dewan Perwakilan Rakyat Republik Indonesia (DPR-RI) periode Tahun 2014-2019 terkait usulan Dana Perimbangan Keuangan Daerah pada RAPBN-P Tahun Anggaran 2018. Sprin.Juk Nomor: 91/TUT.01.00/24/08/2018 tanggal 30 Agustus 2018. BP/89/DIK.02.00/23/08/2018 tanggal 24 Agustus 2018.
11. Perkara TPK atas nama terdakwa EKA KAMALUDDIN Penerimaan Hadiah atau Janji terkait usulan Dana Perimbangan Keuangan Daerah pada RAPBN-P Tahun Anggaran 2018. Sprin.Juk Nomor :



92/TUT.01.00/24/08/2018 tanggal 30 Agustus 2018.

12. Perkara TPK atas nama terdakwa YAYA PURNOMO Penerimaan Hadiah atau Janji terkait usulan Dana Perimbangan Keuangan Daerah pada RAPBN-P Tahun Anggaran 2018. Sprin.Juk Nomor : 94/TUT.01.00/24/08/2018 tanggal 31 Agustus 2018. BP/91/DIK.02.00/23/08/2018 tanggal 27 Agustus 2018.
13. Perkara TPK atas nama terdakwa AHMADI memberi hadiah atau janji kepada drh. H. Irwandi Yusuf, M.Sc selaku Gubernur Provinsi Aceh periode tahun 2017-2022 bersama-sama Hendri Yuzal dan T. Saiful Bahri terkait Pengalokasian dan Penyaluran Dana Otonomi Khusus Aceh (DOKA) Tahun Anggaran 2018 untuk Kabupaten Bener Meriah pada Pemerintah Provinsi Aceh. Sprin.Juk Nomor : 93/TUT.01.00/24/08/2018 tanggal 31 Agustus 2018. BP/93/DIK.02.00/23/08/2018 tanggal 27 Agustus 2018.

## September

1. Perkara TPK atas nama terdakwa PUSPA SUKRISNA alias ASUN alias KOH ASUN bersama-sama dengan Miftahudin yaitu memberi hadiah atau janji terkait perizinan PT Pura Binaka Mandiri dan PT Alfa Sentra Property kepada Hj. Imas Aryumningsih S.E selaku Bupati Subang periode 2017-2018, Asep Santika selaku Kabid Perizinan DPMPTSP Kabupaten Subang, dan Data alias Darto. Sprin.Juk Nomor: 95/TUT.01.00/24/09/2018 tanggal 03 September 2018. BP/88/DIK.02.00/23/08/2018 tanggal 24 Agustus 2018.
2. Perkara TPK atas nama terdakwa MOCH. ARDI PRASETIAWAN memberi hadiah atau janji terkait fungsi pengawasan oleh Dewan Perwakilan Rakyat Daerah Provinsi Jawa Timur terhadap pelaksanaan Peraturan Daerah dan Penggunaan Anggaran di Provinsi Jawa Timur Tahun Anggaran 2016-2017. Sprin.juk Nomor: 96/TUT.01.00/24/09/2018 tanggal 03 September 2018. BP/92/DIK.02.00/23/08/2018 tanggal 27 Agustus 2018.
3. Perkara TPK atas nama terdakwa M. SAMSUL ARIFIEN memberi hadiah atau janji terkait fungsi pengawasan oleh Dewan Perwakilan Rakyat Daerah Provinsi Jawa Timur terhadap pelaksanaan Peraturan Daerah dan Penggunaan Anggaran di Provinsi Jawa Timur Tahun Anggaran 2016-2017. Sprin.Juk Nomor: 97/TUT.01.00/24/09/2018 tanggal 07 September 2018. BP/94/DIK.02.00/23/08/2018 tanggal 29 Agustus 2018.
4. Perkara TPK atas nama terdakwa JOHANES BUDISUTRISNO KOTJO yaitu memberi hadiah atau janji kepada pegawai negeri atau penyelenggara negara Eni Maulani Saragih selaku Anggota DPR RI periode 2014 s.d. 2019 terkait kesepakatan kontrak kerjasama Pembangunan PLTU Riau-1. Sprin.Juk Nomor: 98/TUT.01.00/24/09/2018 tanggal 10 September 2019. Berkas Perkara Nomor BP/95/DIK.02.00/23/08/2018 tanggal 05 September 2018.
5. Perkara TPK atas nama terdakwa EFENDY SAHPUTRA Alias ASIONG memberi hadiah atau janji kepada Pangonal Harahap selaku Bupati Labuhanbatu Sumatera Utara periode 2016 s.d. 2021 dan Umar Ritonga terkait proyek-proyek di Lingkungan Pemerintah Kabupaten Labuhanbatu Sumatera Utara Tahun Anggaran 2018. Sprin.Juk Nomor : 99/TUT.01.00/24/09/2018 tanggal 14 September 2018. Berkas Perkara Nomor: BP/96/DIK.02.00/23/08/2018 tanggal 10 September 2018
6. Perkara TPK atas nama terdakwa AGUS FEISAL HIDAYAT menerima hadiah atau janji padahal diketahui atau patut diduga hadiah atau janji tersebut diberikan untuk menggerakkan agar melakukan atau tidak melakukan sesuatu dalam jabatannya atau karena telah melakukan atau tidak melakukan sesuatu dalam jabatannya, yang bertentangan dengan kewajibannya terkait proyek pekerjaan di Pemda Kabupaten Buton Selatan. Sprin.Juk Nomor: 100/TUT.01.00/24/09/2018 tanggal 20 September 2018. Berkas Perkara Nomor BP/98/DIK.02.00/23/09/2018 tanggal 18 September 2018.
7. Perkara TPK atas nama terdakwa GILANG RAMADHAN memberi hadiah atau janji terkait pengadaan barang dan jasa di lingkungan Pemerintah Kabupaten Lampung Selatan Tahun

Anggaran 2018. Sprin.Juk Nomor: 101/TUT.01.00/24/09/2018 tanggal 24 September 2018. Berkas Perkara Nomor: BP/97/DIK.02.00/23/09/2018 tanggal 17 September 2018.

8. Perkara TPK atas nama terdakwa PT. DUTA GRAHA INDAH. Tbk (yang telah berubah nama menjadi PT. Nusa Konstruksi Enjineering, Tbk.) sehubungan dengan Pekerjaan Pembangunan Rumah Sakit Pendidikan Khusus Penyakit Infeksi dan Pariwisata Universitas Udayana Tahun Anggaran 2009 s.d 2010. Sprin.Juk Nomor: 102/TUT.01.00/24/09/2018 tanggal 25 September 2018. Berkas Perkara Nomor: BP/80/DIK.02.00/23/09/2018 tanggal 30 Juli 2018.

145. Perkara TPK atas nama terdakwa TASDI menerima hadiah atau janji terkait pengadaan barang dan jasa di lingkungan Pemerintah Kabupaten Purbalingga serta penerimaan lainnya. Sprin.Juk Nomor: 103/TUT.01.00/24/09/2018 tanggal 27 September 2018. Berkas Perkara Nomor: BP/99/DIK.02.00/23/09/2018 tanggal 20 September 2018.

## Oktober

1. Perkara TPK atas nama terdakwa SAMANHUDI ANWAR dan terdakwa BAMBANG PURNOMO menerima hadiah atau janji dari Susilo Prabowo alias Embun, padahal diketahui atau patut diduga bahwa hadiah atau janji tersebut diberikan karena kekuasaan atau kewenangan yang berhubungan dengan jabatannya atau diberikan untuk menggerakkan agar melakukan atau tidak melakukan sesuatu dalam jabatannya, atau disebabkan karena telah melakukan atau tidak melakukan sesuatu dalam jabatannya, yang bertentangan dengan kewajibannya terkait proyek pekerjaan di Pemda Kota Blitar. Sprin.Juk Nomor: 104/TUT.01.00/24/10/2018 tanggal 4 Oktober 2018. BP/100/DIK.02.00/23/10/2018 tanggal 1 Oktober 2018.
2. Perkara TPK atas nama terdakwa SYAHRI MULYO dan terdakwa AGUNG PRAYITNO menerima hadiah atau janji padahal diketahui atau patut diduga hadiah atau janji tersebut diberikan untuk menggerakkan agar melakukan atau tidak melakukan sesuatu dalam jabatannya atau karena telah melakukan atau tidak melakukan sesuatu dalam jabatannya, yang bertentangan dengan kewajibannya terkait proyek pekerjaan di Pemda Kabupaten Tulungagung. Sprin.Juk Nomor: 105/TUT.01.00/24/10/2018 tanggal 4 Oktober 2018. BP/101/DIK.02.00/23/10/2018 tanggal 2 Oktober 2018.
3. Perkara TPK atas nama terdakwa SUTRISNO bersama-sama dengan Syahri Mulyo selaku Bupati Tulungagung periode 2013-2018 menerima hadiah atau janji padahal diketahui atau patut diduga hadiah atau janji tersebut diberikan untuk menggerakkan agar melakukan atau tidak melakukan sesuatu dalam jabatannya atau karena telah melakukan atau tidak melakukan sesuatu dalam jabatannya, yang bertentangan dengan kewajibannya terkait proyek pekerjaan di Pemda Kabupaten Tulungagung. Sprin.Juk Nomor: 106/TUT.01.00/24/10/2018 tanggal 4 Oktober 2018. BP/102/DIK.02.00/23/10/2018 tanggal 2 Oktober 2018.
4. Perkara TPK atas nama terdakwa TIAISAH RITONGA menerima hadiah atau janji dari Gatot Pujo Nugroho selaku Gubernur Provinsi Sumatera Utara terkait fungsi dan kewenangan anggota DPRD Provinsi Sumatera Utara periode 2009 s/d 2014 dan/atau periode 2014 s/d 2019. Sprin.Juk Nomor : 111/TUT.01.00/24/10/2018 tanggal 26 Oktober 2018. BP/104/DIK.02.00/23/10/2018 tanggal 15 Oktober 2018.
5. Perkara TPK atas nama terdakwa LUCAS yaitu dengan sengaja mencegah, merintang, atau menggagalkan secara langsung atau tidak langsung penyidikan tindak pidana korupsi terhadap Tersangka Eddy Sindoro. Sprin.Juk Nomor: 112/TUT.01.00/24/10/2018 tanggal 26 Oktober 2018. BP/107/DIK.02.00/23/10/2018 tanggal 22 Oktober 2018.
6. Perkara TPK atas nama terdakwa RIJAL SIRAIT, RINAWATI SIANTURI, ROOSLYNDA MARPAUNG, FADLY NURZAL menerima hadiah atau janji dari Gatot Pujo Nugroho selaku Gubernur Provinsi Sumatera Utara terkait fungsi dan kewenangan tersangka selaku Anggota DPRD Provinsi Sumatera Utara periode 2009 s/d 2014 dan/atau periode 2014 s/d 2019. Sprin.Juk Nomor:

- 113/TUT.01.00/24/10/2018 tanggal 26 Oktober 2018. BP/106/DIK.02.00/23/10/2018 tanggal 19 Oktober 2018.
7. Perkara TPK atas nama terdakwa ZAINAL MUS bersama-sama dengan Ahmad Hidayat Mus selaku Bupati Kepulauan Sula periode 2005-2010 terkait Pengadaan Pembebasan Lahan Bandara Bobong pada Anggaran Pendapatan dan Belanja Daerah (APBD) TA 2009 di Kabupaten Kepulauan Sula. Sprin.Juk Nomor: 114/TUT.01.00/24/10/2018 tanggal 29 Oktober 2018. BP/112/DIK.02.00/23/10/2018 tanggal 25 Oktober 2018.
  8. Perkara TPK atas nama terdakwa AHMAD HIDAYAT MUS bersama-sama dengan Zainal Mus terkait Pengadaan Pembebasan Lahan Bandara Bobong pada Anggaran Pendapatan dan Belanja Daerah (APBD) TA 2009 di Kabupaten Kepulauan Sula. Sprin.Juk Nomor: 115/TUT.01.00/24/10/2018 tanggal 29 Oktober 2018. BP/113/DIK.02.00/23/10/2018 tanggal 25 Oktober 2018.
  9. Perkara TPK atas nama terdakwa HENDRI YUZAL bersama-sama T. Saiful Bahri dan drh. H. Irwandi Yusuf, M.Sc selaku Gubernur Provinsi Aceh periode tahun 2017-2022, yaitu menerima hadiah atau janji dari Ahmadi, SE selaku Bupati Bener Meriah periode tahun 2017-2022 terkait Pengalokasian dan Penyaluran Dana Otonomi Khusus Aceh (DOKA) Tahun Anggaran 2018 untuk Kabupaten Bener Meriah pada Pemerintah Provinsi Aceh. Sprin.Juk Nomor: 116/TUT.01.00/24/10/2018 tanggal 30 Oktober 2018. BP/108/DIK.02.00/23/10/2018 tanggal 23 Oktober 2018.
  10. Perkara TPK atas nama terdakwa T. SAIFUL BAHRI bersama-sama Hendri Yuzal dan drh. H. Irwandi Yusuf, M.Sc selaku Gubernur Provinsi Aceh periode tahun 2017-2022 , yaitu menerima hadiah atau janji dari Ahmadi, SE selaku Bupati Bener Meriah periode tahun 2017-2022 terkait Pengalokasian dan Penyaluran Dana Otonomi Khusus Aceh (DOKA) Tahun Anggaran 2018 untuk Kabupaten Bener Meriah pada Pemerintah Provinsi Aceh. Sprin.Juk Nomor: 117/TUT.01.00/24/10/2018 tanggal 30 Oktober 2018. BP/108/DIK.02.00/23/10/2018 tanggal 23 Oktober 2018.
  11. Perkara TPK atas nama terdakwa H. IRWANDI YUSUF sehubungan dengan bersama-sama Hendri Yuzal dan T. Saiful Bahri, yaitu menerima hadiah atau janji dari Ahmadi, SE selaku Bupati Bener Meriah periode tahun 2017-2022 terkait Pengalokasian dan Penyaluran Dana Otonomi Khusus Aceh (DOKA) Tahun Anggaran 2018 untuk Kabupaten Bener Meriah pada Pemerintah Provinsi Aceh. Dan Perkara TPK bersama-sama Izil Azhar, yaitu menerima gratifikasi yang berhubungan dengan jabatannya dan yang berlawanan dengan kewajiban atau tugasnya. Sprin.Juk Nomor: 118/TUT.01.00/24/10/2018 tanggal 30 Oktober 2018. BP/108/DIK.02.00/23/10/2018 tanggal 23 Oktober 2018.
  12. Perkara TPK atas nama terdakwa HELMIATI, MUSLIM SIMBOLON, SONNY FIRDAUS sehubungan dengan menerima hadiah atau janji dari Gatot Pujo Nugroho selaku Gubernur Provinsi Sumatera Utara terkait fungsi dan kewenangan anggota DPRD Provinsi Sumatera Utara periode 2009 s/d 2014 dan/atau periode 2014 s/d 2019. Sprin.Juk Nomor: 119/TUT.01.00/24/10/2018 tanggal 31 Oktober 2018. BP/103/DIK.02.00/23/10/2018 tanggal 12 Oktober 2018.

## November

1. Perkara TPK atas nama terdakwa ARIFIN NAINGGOLAN, MUSTOFAWIYAH, SOPAR SIBURIAN, ANALISMAN ZALUKHU sehubungan dengan menerima hadiah atau janji dari Gatot Pujo Nugroho selaku Gubernur Provinsi Sumatera Utara terkait fungsi dan kewenangan selaku Anggota DPRD Provinsi Sumatera Utara periode 2009 s/d 2014 dan/atau periode 2014 s/d 2019. Sprin.Juk Nomor: 120/TUT.01.00/24/11/2018 tanggal 05 November 2018. BP/105/DIK.02.00/23/10/2018 tanggal 16 Oktober 2018
2. Perkara TPK atas nama terdakwa ENI MAULANI SARAGIH yaitu menerima hadiah atau janji dari Johannes Budisutrisno Kotjo terkait kesepakatan kontrak kerjasama Pembangunan PLTU Riau-1. Sprin.Juk Nomor: 121/TUT.01.00/24/11/2018 tanggal 09 November 2018. BP/114/DIK.02.00/23/11/2018 tanggal 05 November 2018.

3. Perkara TPK atas nama terdakwa BUDI TJAHJONO sehubungan dengan setiap orang yang secara melawan hukum melakukan perbuatan memperkaya diri sendiri atau orang lain atau suatu korporasi yang dapat merugikan keuangan negara atau perekonomian negara terkait dengan pembayaran komisi terhadap kegiatan fiktif agen PT Asuransi Jasa Indonesia (Persero) dalam penutupan Asuransi Oil and Gas pada BP Migas-KKKS Tahun 2010 s.d. 2012 dan Tahun 2012 s.d. 2014. Sprin.Juk Nomor: 122/TUT.01.00/24/11/2018 tanggal 12 November 2018. BP/115/DIK.02.00/23/11/2018 tanggal 06 November 2018.
4. Perkara TPK atas nama terdakwa PANGONAL HARAHAHAP sehubungan dengan menerima hadiah atau janji dari Efendy Sahputra alias Asiong, bersama-sama Umar Ritonga, terkait proyek-proyek di Lingkungan Pemerintah Kabupaten Labuhanbatu Sumatera Utara Tahun Anggaran 2018. Sprin.Juk Nomor: 123/TUT.01.00/24/11/2018 tanggal 14 November 2018. BP/120/DIK.02.00/23/11/2018 tanggal 12 November 2018.
5. Perkara TPK atas nama terdakwa HENDRY SAPUTRA sehubungan dengan penyelenggara negara yang bersama-sama menerima hadiah atau janji padahal diketahui atau patut diduga bahwa hadiah atau janji tersebut diberikan untuk menggerakkan agar melakukan atau tidak melakukan sesuatu dalam jabatannya yang bertentangan dengan kewajibannya terkait dengan Pemberian Fasilitas, Pemberian Perizinan ataupun Pemberian lainnya di LP Klas I Sukamiskin. Sprin.Juk Nomor: 124/TUT.01.00/24/11/2018 tanggal 16 November 2018. BP/119/DIK.02.00/23/11/2018 tanggal 12 November 2018.
6. Perkara TPK atas nama terdakwa WAHID HUSEN sehubungan dengan penyelenggara negara yang bersama-sama menerima hadiah atau janji padahal diketahui atau patut diduga bahwa hadiah atau janji tersebut diberikan untuk menggerakkan agar melakukan atau tidak melakukan sesuatu dalam jabatannya yang bertentangan dengan kewajibannya terkait dengan Pemberian Fasilitas, Pemberian Perizinan ataupun Pemberian lainnya di LP Klas I Sukamiskin. Sprin.Juk Nomor: 125/TUT.01.00/24/11/2018 tanggal 16 November 2018. BP/118/DIK.02.00/23/11/2018 tanggal 12 November 2018.
7. Perkara TPK atas nama terdakwa ANDRI RAHMAT sehubungan dengan secara bersama-sama memberi atau menjanjikan sesuatu kepada penyelenggara negara dengan maksud supaya penyelenggara negara tersebut berbuat atau tidak berbuat sesuatu dalam jabatannya, yang bertentangan dengan kewajibannya terkait dengan Pemberian Fasilitas, Pemberian Perizinan ataupun Pemberian lainnya di LP Klas I Sukamiskin. Sprin.Juk Nomor: 126/TUT.01.00/24/11/2018 tanggal 16 November 2018. BP/117/DIK.02.00/23/11/2018 tanggal 12 November 2018.
8. Perkara TPK atas nama terdakwa FAHMI DARMAWANSYAH sehubungan dengan secara bersama-sama memberi atau menjanjikan sesuatu kepada penyelenggara negara dengan maksud supaya penyelenggara negara tersebut berbuat atau tidak berbuat sesuatu dalam jabatannya, yang bertentangan dengan kewajibannya terkait dengan Pemberian Fasilitas, Pemberian Perizinan ataupun Pemberian lainnya di LP Klas I Sukamiskin. Sprin.Juk Nomor: 127/TUT.01.00/24/11/2018 tanggal 16 November 2018. BP/116/DIK.02.00/23/11/2018 tanggal 12 November 2018.
9. Perkara TPK atas nama terdakwa TAMIN SUKARDI sehubungan dengan secara bersama-sama memberi atau menjanjikan sesuatu kepada Hakim dengan maksud untuk mempengaruhi putusan perkara yang diserahkan kepadanya untuk diadili atau secara bersama-sama memberi atau menjanjikan sesuatu kepada pegawai negeri atau penyelenggara negara dengan maksud supaya pegawai negeri atau penyelenggara negara tersebut berbuat atau tidak berbuat sesuatu dalam jabatannya, yang bertentangan dengan kewajibannya terkait dengan putusan perkara Tindak Pidana Korupsi Nomor: 33/Pid.Sus-TPK/2018/PN.Mdn atas nama Terdakwa Tamin Sukardi. Sprin.Juk Nomor: 128/TUT.01.00/24/11/2018 tanggal 23 November 2018. BP/121/DIK.02.00/23/11/2018 tanggal 16 November 2018.

10. Perkara TPK atas nama terdakwa HADI SETIAWAN sehubungan dengan secara bersama-sama memberi atau menjanjikan sesuatu kepada Hakim dengan maksud untuk mempengaruhi putusan perkara yang diserahkan kepadanya untuk diadili atau secara bersama-sama memberi atau menjanjikan sesuatu kepada pegawai negeri atau penyelenggara negara dengan maksud supaya pegawai negeri atau penyelenggara negara tersebut berbuat atau tidak berbuat sesuatu dalam jabatannya, yang bertentangan dengan kewajibannya terkait dengan putusan perkara Tindak Pidana Korupsi Nomor : 33/Pid.Sus-TPK/2018/PN.Mdn atas nama Terdakwa Tamin Sukardi. Sprin.Juk Nomor: 129/TUT.01.00/24/11/2018 tanggal 23 November 2018. BP/122/DIK.02.00/23/11/2018 tanggal 16 November 2018.
11. Perkara TPK atas nama terdakwa ZAINUDIN HASAN sehubungan dengan menerima hadiah atau janji terkait pengadaan barang dan jasa di lingkungan Pemerintah Kabupaten Lampung Selatan. Sprin.Juk Nomor: 130/TUT.01.00/24/11/2018 tanggal 23 November 2018. BP/123/DIK.02.00/23/11/2018 tanggal 16 November 2018.
12. Perkara TPK atas nama terdakwa ANJAR ASMARA sehubungan dengan menerima hadiah atau janji terkait pengadaan barang dan jasa di lingkungan Pemerintah Kabupaten Lampung Selatan bersama-sama dengan Zainudin Hasan selaku Bupati Lampung Selatan periode tahun 2016 sampai dengan tahun 2021. Sprin.Juk Nomor: 131/TUT.01.00/24/11/2018 tanggal 23 November 2018. BP/124/DIK.02.00/23/11/2018 tanggal 16 November 2018.
13. Perkara TPPU atas nama terdakwa ZAINUDIN HASAN dalam hubungannya dengan perbuatan menempatkan, mentransfer, mengalihkan, membelanjakan, membayarkan, menghibahkan, menitipkan, membawa ke luar negeri, mengubah bentuk, menukarkan dengan mata uang atau surat berharga atau perbuatan lain atas Harta Kekayaan yang diketahuinya atau patut diduganya merupakan hasil tindak pidana korupsi dengan tujuan menyembunyikan atau menyamarkan asal usul Harta Kekayaan. Nomor: 132/TUT.01.00/24/11/2018 tanggal 23 November 2018. BP/126/DIK.02.00/23/11/2018 tanggal 16 November 2018.
14. Perkara TPK atas nama terdakwa AGUS BHAKTI NUGROHO sehubungan dengan menerima hadiah atau janji terkait pengadaan barang dan jasa di lingkungan Pemerintah Kabupaten Lampung Selatan bersama-sama dengan Zainudin Hasan selaku Bupati Lampung Selatan periode tahun 2016 sampai dengan tahun 2021. Sprin.Juk Nomor: 133/TUT.01.00/24/11/2018 tanggal 23 November 2018. BP/125/DIK.02.00/23/11/2018 tanggal 16 November 2018.
15. Perkara TPK atas nama terdakwa ANTHONY LIANDO sehubungan dengan setiap orang yang memberi atau menjanjikan sesuatu kepada penyelenggara negara dengan maksud supaya penyelenggara negara tersebut berbuat atau tidak berbuat sesuatu dalam jabatannya, yang bertentangan dengan kewajibannya terkait dengan Pemeriksaan Khusus Orang Pribadi a.n. Anthony Liando untuk Tahun Pajak 2016. Sprin.Juk Nomor: 134/TUT.01.00/24/11/2018 tanggal 30 November 2018. BP/130/DIK.02.00/23/11/2018 tanggal 26 November 2018.

## Desember

1. Perkara TPK atas nama terdakwa MUHAMAD BAQIR sehubungan dengan berupa pemberian hadiah atau janji kepada Penyelenggara Negara dan/atau Pegawai Negeri, terkait dengan Pengadaan Barang dan Jasa di lingkungan Pemerintah Kota Pasuruan Tahun Anggaran 2018. Nomor : 135/TUT.01.00/24/12/2018 tanggal 03 Desember 2018. BP/127/DIK.02.00/23/11/2018 tanggal 21 November 2018.
2. Perkara TPK atas nama terdakwa PASIRUDDIN DAULAY, ELEZARO DUHA, MUSDALIFAH, TAHAN MANAHAN PANGGABEAN sehubungan dengan menerima hadiah atau janji dari Gatot Pujo Nugroho selaku Gubernur Provinsi Sumatera Utara terkait fungsi dan kewenangan anggota DPRD Provinsi Sumatera Utara periode 2009 s/d 2014 dan/atau periode 2014 s/d 2019. Sprin.Juk Nomor: 136/TUT.01.00/24/12/2018 tanggal 03 Desember 2018. BP/128/DIK.02.00/23/11/2018 tanggal 21 November 2018.

3. Perkara TPK atas nama terdakwa TUNGGUL SIAGIAN, FAHRU ROZI, TAUFAN AGUNG GINTING sehubungan dengan menerima hadiah atau janji dari Gatot Pujo Nugroho selaku Gubernur Provinsi Sumatera Utara terkait fungsi dan kewenangan anggota DPRD Provinsi Sumatera Utara periode 2009 s/d 2014 dan/atau periode 2014 s/d 2019. Sprin.Juk Nomor: 137/TUT.01.00/24/12/2018 tanggal 03 Desember 2018. BP/129/DIK.02.00/23/11/2018 tanggal 21 November 2018.
4. Perkara TPK atas nama terdakwa EDDY SINDORO sehubungan dengan memberi hadiah atau janji kepada pegawai negeri atau penyelenggara negara terkait dengan pengurusan perkara di Pengadilan Negeri Jakarta Pusat dengan maksud supaya pegawai negeri atau penyelenggara negara tersebut berbuat atau tidak berbuat sesuatu dalam jabatannya atau karena berhubungan dengan suatu perbuatan yang berhubungan dengan jabatannya yang bertentangan dengan kewajibannya. Sprin.Juk Nomor: 138/TUT.01.00/24/12/2018 tanggal 10 Desember 2018. BP/136/DIK.02.00/23/12/2018 tanggal 03 Desember 2018.
5. Perkara TPK atas nama terdakwa ARIEF HERMANTO, TEGUH MULYONO, MULYANTO, CHOEROEL ANWAR, SUPARNO HADIWIBOWO sehubungan dengan menerima hadiah atau janji terkait Pembahasan APBD-P Pemkot Malang TA 2015 dari Moch. Anton selaku Walikota Malang periode tahun 2013 s.d. 2018 dan kawan-kawan dan melakukan dugaan tindak pidana korupsi yaitu menerima gratifikasi yang berhubungan dengan jabatannya dan yang berlawanan dengan kewajiban atau tugasnya selaku anggota DPRD Kota Malang periode 2014-2019. Sprin.Juk Nomor: 139/TUT.01.00/24/12/2018 tanggal 10 Desember 2018. BP/131/DIK.02.00/23/11/2018 tanggal 30 November 2018.
6. Perkara TPK atas nama terdakwa ERNI FARIDA, SONY YUDIARTO, HARUN PRASOJO, TEGUH PUJI WAHYONO, CHOIRUL AMRI sehubungan dengan menerima hadiah atau janji terkait Pembahasan APBD-P Pemkot Malang TA 2015 dari Moch. Anton selaku Walikota Malang periode tahun 2013 s.d. 2018 dan kawan-kawan dan melakukan dugaan tindak pidana korupsi yaitu menerima gratifikasi yang berhubungan dengan jabatannya dan yang berlawanan dengan kewajiban atau tugasnya selaku anggota DPRD Kota Malang periode 2014-2019. Sprin.Juk Nomor: 140/TUT.01.00/24/12/2018 tanggal 10 Desember 2018. BP/137/DIK.02.00/23/12/2018 tanggal 04 Desember 2018.
7. Perkara TPK atas nama terdakwa GATOT RACHMANTO yaitu memberi hadiah atau janji terkait mutasi, rotasi dan promosi jabatan di Pemerintah Kabupaten Cirebon kepada Sunjaya Purwadisastra selaku Bupati Cirebon periode 2014-2019. Sprin.Juk Nomor: 141/TUT.01.00/24/12/2018 tanggal 11 Desember 2018. BP/140/DIK.02.00/23/12/2018 tanggal 06 Desember 2018.
8. Perkara TPK atas nama terdakwa ALI MURTOPO yaitu memberi hadiah atau janji terkait Penyediaan Sarana Penunjang Peningkatan Mutu Pendidikan pada Dinas Pendidikan Pemerintah Kabupaten Malang Tahun Anggaran 2011 kepada Rendra Kresna selaku Bupati Malang periode tahun 2010-2015. Sprin.Juk Nomor: 142/TUT.01.00/24/12/2018 tanggal 13 Desember 2018. BP/139/DIK.02.00/23/12/2018 tanggal 06 Desember 2018.
9. Perkara TPK atas nama terdakwa BILLY SINDORO sehubungan dengan memberi atau menjanjikan sesuatu kepada Pegawai Negeri atau Penyelenggara Negara terkait dengan pengurusan perizinan proyek pembangunan Meikarta di Kabupaten Bekasi. Sprin.Juk Nomor: 143/TUT.01.00/24/12/2018 tanggal 13 Desember 2018. BP/132/DIK.02.00/23/11/2018 tanggal 30 November 2018.
10. Perkara TPK atas nama terdakwa HENRY JASMEN P. SITOANG sehubungan dengan memberi atau menjanjikan sesuatu kepada Pegawai Negeri atau Penyelenggara Negara terkait dengan pengurusan perizinan proyek pembangunan Meikarta di Kabupaten Bekasi. Sprin.Juk Nomor: 144/TUT.01.00/24/12/2018 tanggal 13 Desember 2018. BP/133/DIK.02.00/23/11/2018 tanggal 30 November 2018.
11. Perkara TPK atas nama terdakwa TARYUDI sehubungan dengan memberi atau menjanjikan sesuatu kepada Pegawai Negeri atau Penyelenggara Negara terkait dengan pengurusan perizinan proyek

- pembangunan Meikarta di Kabupaten Bekasi. Sprin.Juk Nomor: 145/TUT.01.00/24/12/2018 tanggal 13 Desember 2018. BP/134/DIK.02.00/23/11/2018 tanggal 30 November 2018.
12. Perkara TPK atas nama terdakwa FITRADJAJA PURNAMA sehubungan dengan memberi atau menjanjikan sesuatu kepada Pegawai Negeri atau Penyelenggara Negara terkait dengan pengurusan perizinan proyek pembangunan Meikarta di Kabupaten Bekasi. Sprin.Juk Nomor: 146/TUT.01.00/24/12/2018 tanggal 13 Desember 2018. BP/135/DIK.02.00/23/11/2018 tanggal 30 November 2018.
  13. Perkara TPK atas nama terdakwa RAHMIANNA DELIMA PULUNGAN sehubungan dengan menerima hadiah atau janji dari Gatot Pujo Nugroho selaku Gubernur Provinsi Sumatera Utara terkait fungsi dan kewenangan selaku Anggota DPRD Provinsi Sumatera Utara periode 2009 s/d 2014 dan/atau periode 2014 s/d 2019. Sprin.Juk Nomor: 147/TUT.01.00/24/12/2018 tanggal 18 Desember 2018. BP/144/DIK.02.00/23/12/2018 tanggal 11 Desember 2018.
  14. Perkara TPK atas nama terdakwa RESTU KURNIAWAN SARUMAHA, WASHINGTON PANE, JOHN HUGO SILALAH, FERRY SUANDO TANURAY KABAN sehubungan dengan menerima hadiah atau janji dari Gatot Pujo Nugroho selaku Gubernur Provinsi Sumatera Utara terkait fungsi dan kewenangan anggota DPRD Provinsi Sumatera Utara periode 2009 s/d 2014 dan/atau periode 2014 s/d 2019. Sprin.Juk Nomor: 148/TUT.01.00/24/12/2018 tanggal 18 Desember 2018. BP/145/DIK.02.00/23/12/2018 tanggal 12 Desember 2018.
  15. Perkara TPK atas nama terdakwa DTM ABUL HASAN MATURIDI, BILLER PASARIBU, RICHARD EDDY MARSAUT LINGGA, SYAFRIDA FITRIE sehubungan dengan menerima hadiah atau janji dari Gatot Pujo Nugroho selaku Gubernur Provinsi Sumatera Utara yang terkait fungsi dan kewenangan selaku Anggota DPRD Provinsi Sumatera Utara periode 2009 s/d 2014 dan/atau periode 2014 s/d 2019. Sprin.Juk Nomor: 149/TUT.01.00/24/12/2018 tanggal 18 Desember 2018. BP/143/DIK.02.00/23/12/2018 tanggal 11 Desember 2018.
  16. Perkara TPK atas nama terdakwa EDY SAPUTRA SURADJA sehubungan dengan bersama-sama dengan Teguh Dudy Syamsury Zaldy dan Willy Agung Adipradhana yaitu memberi hadiah atau janji kepada Borak Milton, Punding LH Bangkan, Edy Rosada dan Arisavanah selaku Komisi B DPRD Provinsi Kalimantan Tengah periode 2014-2019 dalam menjalankan tugas dan fungsi DPRD. Sprin.Juk Nomor: 150/TUT.01.00/24/12/2018 tanggal 21 Desember 2018. BP/151/DIK.02.00/23/12/2018 tanggal 18 Desember 2018.
  17. Perkara TPK atas nama terdakwa TEGUH DUDY SYAMSURY ZALDY dan WILLY AGUNG ADIPRADHANA sehubungan dengan bersama-sama Edy Saputra Suradja selaku Wakil Direktur Utama PT SMART, Tbk. dan Direktur PT Binasawit Abadi Pratama, yaitu memberi hadiah atau janji kepada Borak Milton, Punding LH Bangkan, Edy Rosada dan Arisavanah selaku Komisi B DPRD Provinsi Kalimantan Tengah periode 2014-2019 dalam menjalankan tugas dan fungsi DPRD. Sprin.Juk Nomor: 151/TUT.01.00/24/12/2018 tanggal 21 Desember 2018. BP/152/DIK.02.00/23/12/2018 tanggal 18 Desember 2018.
  18. Perkara TPK atas nama terdakwa HELPANDI sehubungan dengan secara bersama-sama dengan Hakim yang menerima hadiah atau janji padahal diketahui atau patut diduga bahwa hadiah atau janji tersebut diberikan untuk mempengaruhi putusan perkara yang diserahkan kepadanya untuk diadili atau secara bersama-sama pegawai negeri atau penyelenggara negara yang menerima hadiah atau janji padahal diketahui atau patut diduga bahwa hadiah atau janji tersebut diberikan untuk menggerakkan agar melakukan atau tidak melakukan sesuatu dalam jabatannya, yang bertentangan dengan kewajibannya terkait dengan putusan perkara Tindak Pidana Korupsi Nomor: 33/Pid.Sus-TPK/2018/PN.Mdn atas nama Terdakwa Tamin Sukardi. Sprin.Juk Nomor : 152/TUT.01.00/24/12/2018 tanggal 26 Desember 2018. BP/147/DIK.02.00/23/12/2018 tanggal 17 Desember 2018.
  19. Perkara TPK atas nama terdakwa MERRY PURBA sehubungan dengan secara bersama-sama menerima hadiah atau janji padahal diketahui atau patut diduga bahwa hadiah atau janji tersebut

diberikan untuk mempengaruhi putusan perkara yang diserahkan kepadanya untuk diadili atau secara bersama-sama pegawai negeri atau penyelenggara negara yang menerima hadiah atau janji padahal diketahui atau patut diduga bahwa hadiah atau janji tersebut diberikan untuk menggerakkan agar melakukan atau tidak melakukan sesuatu dalam jabatannya, yang bertentangan dengan kewajibannya terkait dengan putusan perkara Tindak Pidana Korupsi Nomor: 33/Pid.Sus-TPK/2018/PN.Mdn atas nama Terdakwa Tamin Sukardi. Sprin.Juk Nomor : 153/TUT.01.00/24/12/2018 tanggal 26 Desember 2018. BP/148/DIK.02.00/23/12/2018 tanggal 17 Desember 2018.

20. Perkara TPK atas nama terdakwa RIBUT HARIANTO sehubungan dengan menerima hadiah atau janji terkait Pembahasan APBD-P Pemkot Malang TA 2015 dari Moch. Anton selaku Walikota Malang periode tahun 2013 s.d. 2018 dan kawan-kawan dan melakukan dugaan tindak pidana korupsi yaitu menerima gratifikasi yang berhubungan dengan jabatannya dan yang berlawanan dengan kewajiban atau tugasnya selaku anggota DPRD Kota Malang periode 2014-2019. Sprin.Juk Nomor: 154/TUT.01.00/24/12/2018 tanggal 27 Desember 2018. BP/149/DIK.02.00/23/12/2018 tanggal 17 Desember 2018.
21. Perkara TPK atas nama terdakwa IMAM GHOZALI, MOHAMMAD FADLI, ASIA IRIANI, INDRA TJAHYONO, EEN AMBARSARI, BAMBANG TRIYOSO sehubungan dengan menerima hadiah atau janji terkait Pembahasan APBD-P Pemkot Malang TA 2015 dari Moch. Anton selaku Walikota Malang periode tahun 2013 s.d. 2018 dan kawan-kawan dan melakukan dugaan tindak pidana korupsi yaitu menerima gratifikasi yang berhubungan dengan jabatannya dan yang berlawanan dengan kewajiban atau tugasnya selaku anggota DPRD Kota Malang periode 2014-2019. Sprin.Juk Nomor: 155/TUT.01.00/24/12/2018 tanggal 27 Desember 2018. BP/150/DIK.02.00/23/12/2018 tanggal 17 Desember 2018.
22. Perkara TPK atas nama terdakwa DIANA YANTI, SUGIARTO, AFDHAL FAUZA, SYAMSUL FAJRIH, HADI SUSANTO sehubungan dengan menerima hadiah atau janji terkait Pembahasan APBD-P Pemkot Malang TA 2015 dari Moch. Anton selaku Walikota Malang periode tahun 2013 s.d. 2018 dan kawan-kawan dan melakukan dugaan tindak pidana korupsi yaitu menerima gratifikasi yang berhubungan dengan jabatannya dan yang berlawanan dengan kewajiban atau tugasnya selaku anggota DPRD Kota Malang periode 2014-2019. Sprin.Juk Nomor: 156/TUT.01.00/24/12/2018 tanggal 27 Desember 2018. BP/146/DIK.02.00/23/12/2018 tanggal 17 Desember 2018.
23. Perkara TPK atas nama terdakwa IDRUS MARHAM sehubungan dengan bersama-sama dengan Eni Maulani Saragih selaku Anggota DPR RI periode 2014 s.d. 2019 dan kawan-kawan yaitu menerima hadiah atau janji dari Johannes Budisutrisno Kotjo terkait kesepakatan kontrak kerjasama Pembangunan PLTU Riau-1. Sprin.Juk Nomor: 157/TUT.01.00/24/12/2018 tanggal 28 Desember 2018. BP/142/DIK.02.00/23/12/2018 tanggal 10 Desember 2018.

**f Share**

[Tweet](#)

You are here: / [Publikasi](#) / [Penanganan Perkara \(/id/publikasi/penanganan-perkara\)](#)  
/ [Penuntutan \(/id/publikasi/penanganan-perkara/penuntutan\)](#) / [Penuntutan 2018](#)



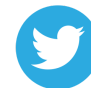

@KPK\_RI ([https://twitter.com/kpk\\_ri](https://twitter.com/kpk_ri)) : #KawanAksi juga dapat menyimak Data LHK Kepala Daerah Provinsi 5

---

## Tentang KPK

Visi dan Misi (/id/tentang-kpk/sekilas-kpk)

Fungsi dan Tugas (/id/tentang-kpk/fungsi-dan-tugas)

Struktur Organisasi (/id/layanan-informasi-publik/laporan-harta-kekayaan-penyelenggaraan-negara/informasi-berkala/informasi-berkaitan-badan-publik/struktur-organisasi)

Pejabat Struktur KPK (/id/tentang-kpk/pejabat-struktural)

Rencana Strategis (/id/tentang-kpk/roadmap-dan-rencana-strategis)

Profil Pimpinan (/id/layanan-informasi-publik/laporan-harta-kekayaan-penyelenggaraan-negara/informasi-berkala/informasi-berkaitan-badan-publik/profil-pimpinan-kpk)

Undang - Undang Pendukung (/id/layanan-informasi-publik/laporan-harta-kekayaan-penyelenggaraan-negara/informasi-berkala/undang-undang-pemberantasan-tindak-pidana-korupsi)

---

## Indeks Berita

Siaran Pers (/id/berita/siaran-pers)

Berita KPK (/id/berita/berita-kpk)

Publik Bicara (/id/berita/publik-bicara)

---

## Layanan Publik

Pengaduan Masyarakat (/id/layanan-publik/pengaduan-masyarakat/mengenal-pengaduan-masyarakat)

LHKPN (/id/layanan-publik/laporan-harta-kekayaan-penyelenggaraan-negara/mengenal-lhkpn)

Gratifikasi (/id/layanan-publik/gratifikasi/mengenal-gratifikasi)

Informasi Publik (/id/layanan-publik/informasi-publik)

---

## Publikasi

Laporan Keuangan (/id/publikasi/laporan-keuangan)

Laporan Tahunan (/id/publikasi/laporan-tahunan)

## Kontak KPK

---

### GEDUNG KPK

Jln. Kuningan Persada Kav. 4

Jakarta Selatan 12950

Telp : (021) 2557 8300

Faks : (021) 2557 8333

**Call Center: 198**

Email : informasi@kpk.go.id

---

Hak Cipta © 2019 Komisi Pemberantasan Korupsi. Semua Hak Dilindungi.

## **BERSAMA KPK BERANTAS KORUPSI**

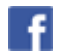

(<https://www.facebook.com/KomisiPemberantasanKorupsi>)

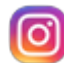

(<https://www.instagram.com/official.kpk>)

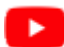

(<https://www.youtube.com/user/HUMASKPK>)
