# Supplementary material for: Democratization, leader education and growth: firm-level evidence from Indonesia
Source: Springer Nature journal article supplement (doi:10.1007/s10887-022-09221-5), 2023-02-15
Supplement: MOESM2 [file Penyidikan 2006.pdf › Data/Mayor-level corruption dataset (incl sources)/KPK Penyidikan 2006-/Penyidikan 2006.pdf]

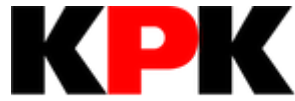

Komisi Pemberantasan Korupsi

[\(https://www.kpk.go.id/\)](https://www.kpk.go.id/)▼  Bahasa Indonesia

## Penyidikan

### Penyidikan 2006 (/id/publikasi/penanganan-perkara/penyidikan/701-penyidikan-2006)

 Penyidikan (/id/publikasi/penanganan-perkara/penyidikan)  30 Desember 2006

Sepanjang tahun 2006, kegiatan penyidikan yang dijalankan oleh KPK sebanyak 27 (dua puluh tujuh) perkara.

1. TPK pengadaan segel sampul surat suara Pemilu Tahun 2004 atas nama tersangka Daan Dimara (Anggota KPU)
2. TPK pengadaan kotak suara Pemilu tahun 2004 atas nama tersangka Mulyana W Kusuma (Anggota KPU)
3. TPK pungutan perpanjangan paspor pada Atase Imigrasi KJRI Penang – Malaysia atas nama tersangka Muh Khusnul Yakin Payopo (Kasubid Imigrasi KJRI Penang Malaysia)
4. TPK usaha penyuaian/pemerasan terhadap saksi atas nama tersangka Suparman (Penyidik KPK)
5. TPK pungutan perpanjangan paspor pada Atase Imigrasi KJRI Penang – Malaysia atas nama tersangka Erick Hikmat Setiawan (Konjen KJRI Penang)
6. TPK pengadaan bus pada proyek busway yang menggunakan APBD Propinsi DKI Jakarta Tahun 2003 dan 2004 atas nama tersangka Rustam Effendy (Kepala Dinas Perhubungan DKI)
7. TPK pelaksanaan Program Pembangunan Perkebunan Kelapa Sawit sejuta Hektar di Kalimantan Timur yang diikuti dengan Penerbitan Ijin Pemanfaatan Kayu Tahun 1999 sd 2002 atas nama tersangka Suwarna (Gubernur Kalimantan Timur)
8. TPK pengadaan barang dan jasa peralatan laboratorium pada Departemen Kelautan dan Perikanan atas nama tersangka Dasirwan dan Jules Fulop (Pimpinan proyek dan ketua panitia pengadaan)
9. TPK pengadaan barang dan jasa peralatan laboratorium pada Departemen Kelautan dan Perikanan atas nama tersangka Tirta Winata (Swasta)
10. TPK pengeluaran atau penggunaan dana yang tidak sesuai dengan peruntukannya pada Dana Tak Tersangka APBD Kabupaten Dompu TA 2003, 2004 dan 2005 atas nama tersangka Abubakar Ahmad (Bupati Dompu)
11. TPK pengadaan bus pada proyek busway yang menggunakan APBD Propinsi DKI Jakarta Tahun 2003 dan 2004 atas nama tersangka Budhi Susanto (Swasta)
12. TPK pengadaan Kotak Suara untuk PEMILU Tahun 2004 atas nama tersangka Sihol P Manulang (Swasta)

13. TPK dengan turut serta atau membantu SUWARNA AF melaksanakan tindak pidana korupsi pada pelaksanaan program pembangunan perkebunan kelapa sawit sejuta hektar di Kalimantan Timur yang diikuti dengan penerbitan ijin pemanfaatan kayu atas nama tersangka Martias (Swasta)
14. TPK pengelolaan dana PNPB (Penerimaan Negara Bukan Pajak) terkait pungutan tarif pengurusan dokumen keimigrasian di KJRI Johor Bahru atas nama tersangka Prihatna Setiawan (Kasubid. Imigrasi Johor Bahru Malaysia)
15. TPK pengelolaan dana PNPB (Penerimaan Negara Bukan Pajak) terkait pungutan tarif pengurusan dokumen keimigrasian di KJRI Johor Bahru atas nama tersangka Maryadi Hadisuwiryono (Konjen)
16. TPK pengelolaan dana PNPB (Penerimaan Negara Bukan Pajak) terkait pungutan tarif pengurusan dokumen keimigrasian di KJRI Johor Bahru atas nama tersangka Eda Makmur (Konjen RI Johar Baru)
17. TPK pengadaan barang peralatan laboratorium Pusat Riset Pengolahan Produk Sosial Ekonomi Kelautan dan Perikanan TA 2003 atas nama tersangka Andjar Suparman (Sekretaris BRKP Dep. Kelautan dan Perikanan)
18. TPK turut serta atau membantu RUSTAM EFFENDI melakukan tindak Pidana Korupsi dalam pengadaan Bus pada Proyek Busway di Dinas Perhubungan Propinsi DKI Jakarta tahun 2003-2004 dan pegawai negeri yang menerima hadiah, karena patut diduga sebagai sebab melakukan sesuatu atau tidak melakukan sesuatu dalam jabatannya yang bertentangan dengan kewajibannya atas nama tersangka Sylvira Ananda (Kasi Anev. Dan Penyusunan / Tarif Subdis Bangsis - Ketua Panitia Pengadaan)
19. TPK penyalahgunaan atau penggunaan tidak sesuai dengan peruntukannya pada Anggaran Belanja Rutin Pos Kepala Daerah Kalimantan Selatan Tahun 2001 s.d 2004 atas nama tersangka Sjahriel Darham (Gubernur Kalimantan Selatan)
20. TPK permintaan atau pemungutan dana yang tidak ada pengaturannya dari para Sekretaris Direktorat Jenderal di Lingkungan Departemen Kelautan dan Perikanan Tahun 2002 s.d 2006 atas nama tersangka Andin H Tartoyo (Sekretaris Jenderal Departemen Kelautan dan Perikanan)
21. TPK turut serta atau membantu SUWARNA AF melaksanakan tindak pidana korupsi pada pelaksanaan program pembangunan perkebunan kelapa sawit sejuta hektar di Kalimantan Timur yang diikuti dengan penerbitan ijin pemanfaatan kayu atas nama tersangka Waskito Suryodibroto (Dirjen PHP Dep. Kehutanan dan Perkebunan)
22. TPK turut serta atau membantu SUWARNA AF melaksanakan tindak pidana korupsi pada pelaksanaan program pembangunan perkebunan kelapa sawit sejuta hektar di Kalimantan Timur yang diikuti dengan penerbitan ijin pemanfaatan kayu atas nama tersangka Uuh Aliyudin (Swasta)
23. TPK turut serta atau membantu SUWARNA AF melaksanakan tindak pidana korupsi pada pelaksanaan program pembangunan perkebunan kelapa sawit sejuta hektar di Kalimantan Timur yang diikuti dengan penerbitan ijin pemanfaatan kayu atas nama tersangka Robian (Plt. Kakanwil Dep. Hutbun Prov. Kaltim)
24. TPK penyalahgunaan wewenang penggunaan Dana APBD TA 2003 Pos Dana Tak Tersangka Dana Alokasi Umum dan Dana Pinjaman Daerah yang tidak sesuai dengan ketentuan yang berlaku atau pegawai negeri yang menggelapkan Dana APBD TA 2003 Pos Dana Tak Tersangka, Dana Alokasi Umum dan Dana Pinjaman Daerah di Kabupaten Kendal atas nama tersangka Hendy Boedoro (Bupati Kendal)
25. TPK permintaan atau pemungutan dana yang tidak ada pengaturannya dari para Sekteraris Direktorat Jenderal di Lingkungan Departemen Kelautan dan Perikanan Tahun 2002 sd 2006 atas nama tersangka Rochmin Dahuri (Menteri Kelautan dan Perikanan)
26. TPK dalam pelaksanaan proyek pembangunan Bandara Samarinda Kutai Kartanegara yang terjadi di pemerintahan Daerah Kutai Kartanegara Propinsi Kalimantan Timur, pada sekitar tahun 2003 s.d 2004 atas nama tersangka Syauckani HR (Bupati Kutai Kartanegara)

27. TPK penyalahgunaan wewenang penggunaan Dana APBD TA 2003 Pos Dana Tak Tersangka Dana Alokasi Umum dan Dana Pinjaman Daerah yang tidak sesuai dengan ketentuan yang berlaku atau pegawai negeri yang menggelapkan Dana APBD TA 2003 Pos Dana Tak Tersangka, Dana Alokasi Umum dan Dana Pinjaman Daerah di Kabupaten Kendal atas nama tersangka Warsa Susilo (Kepala Dinas Pengelolaan Keuangan Daerah Kendal)

[f Share](#)[Tweet](#)

You are here: / Publikasi / Penanganan Perkara (/id/publikasi/penanganan-perkara)  
/ Penyidikan (/id/publikasi/penanganan-perkara/penyidikan) / Penyidikan 2006

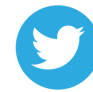

@KPK\_RI ([https://twitter.com/kpk\\_ri](https://twitter.com/kpk_ri)) : #KawanAksi juga dapat menyimak Data LHK Kepala Daerah Provinsi S

## Tentang KPK

Visi dan Misi (/id/tentang-kpk/sekilas-kpk)  
Fungsi dan Tugas (/id/tentang-kpk/fungsi-dan-tugas)  
Struktur Organisasi (/id/layanan-informasi-publik/laporan-harta-kekayaan-penyelenggaraan-negara/informasi-berkala/informasi-berkaitan-badan-publik/struktur-organisasi)  
Pejabat Struktur KPK (/id/tentang-kpk/pejabat-struktural)  
Rencana Strategis (/id/tentang-kpk/roadmap-dan-rencana-strategis)  
Profil Pimpinan (/id/layanan-informasi-publik/laporan-harta-kekayaan-penyelenggaraan-negara/informasi-

## Indeks Berita

Siaran Pers (/id/berita/siaran-pers)  
Berita KPK (/id/berita/berita-kpk)  
Publik Bicara (/id/berita/publik-bicara)

## Layanan Publik

Pengaduan Masyarakat (/id/layanan-publik/pengaduan-masyarakat/mengenal-pengaduan-masyarakat)  
LHKPN (/id/layanan-publik/laporan-harta-kekayaan-penyelenggaraan-negara/mengenal-lhkpn)

berkala/informasi-berkaitan-badan-publik/profil-pimpinan-kpk)

Undang - Undang Pendukung (/id/layanan-informasi-publik/laporan-harta-kekayaan-penyelenggaraan-negara/informasi-berkala/undang-undang-pemberantasan-tindak-pidana-korupsi)

Gratifikasi (/id/layanan-publik/gratifikasi/mengenal-gratifikasi)  
Informasi Publik (/id/layanan-publik/informasi-publik)

## Publikasi

---

Laporan Keuangan (/id/publikasi/laporan-keuangan)

Laporan Tahunan (/id/publikasi/laporan-tahunan)

Laporan PIP (/id/publikasi/laporan-pelayanan-informasi-publik)

## Kontak KPK

---

### GEDUNG KPK

Jln. Kuningan Persada Kav. 4

Jakarta Selatan 12950

Telp : (021) 2557 8300

Faks : (021) 2557 8333

**Call Center: 198**

Email : [informasi@kpk.go.id](mailto:informasi@kpk.go.id)

---

Hak Cipta © 2019 Komisi Pemberantasan Korupsi. Semua Hak Dilindungi.

## BERSAMA KPK BERANTAS KORUPSI

 (<https://www.facebook.com/KomisiPemberantasanKorupsi>) 

(<https://www.instagram.com/official.kpk>)  (<https://www.youtube.com/user/HUMASKPK>)
