# Supplementary material for: Democratization, leader education and growth: firm-level evidence from Indonesia
Source: Springer Nature journal article supplement (doi:10.1007/s10887-022-09221-5), 2023-02-15
Supplement: MOESM2 [file Penyidikan 2007.pdf › Data/Mayor-level corruption dataset (incl sources)/KPK Penyidikan 2006-/Penyidikan 2007.pdf]

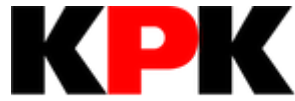

Komisi Pemberantasan Korupsi

[\(https://www.kpk.go.id/\)](https://www.kpk.go.id/)

▼ Bahasa Indonesia

## Penyidikan

### Penyidikan 2007 (/id/publikasi/penanganan-perkara/penyidikan/700-penyidikan-2007)

📁 Penyidikan (/id/publikasi/penanganan-perkara/penyidikan) 📅 30 Desember 2007

Sepanjang tahun 2007, kegiatan penyidikan yang dijalankan oleh KPK sebanyak 24 (dua puluh empat) perkara.

1. TPK pengadaan alat Automatic Fingerprint Identification System (AFIS) pada Ditjen Administrasi Departemen Hukum dan HAM RI Tahun 2004 atas nama tersangka Apendi Kabag. Perlengkapan & Rumah Tangga Ditjen AHU Dep. Hukum & Ham R (berkas dijadikan satu dengan Zulkarnain Yunus)
2. TPK penyalahgunaan Anggaran Pembangunan dan Belanja Kas Daerah TA 2003, 2004, dan 2005 atas nama tersangka Syaukani HR (Bupati Kutai Kartanegara)
3. TPK pengadaan alat Automatic Fingerprint Identification System (AFIS) pada Ditjen Administrasi Departemen Hukum dan HAM RI Tahun 2004 atas nama tersangka Eman Rachman (Swasta)
4. TPK pengadaan alat Automatic Fingerprint Identification System (AFIS) pada Ditjen Administrasi Departemen Hukum dan HAM RI Tahun 2004 atas nama tersangka Zulkarnain Yunus (Sekretaris Jenderal Depkumham)
5. TPK pengelolaan dana PNBPN terkait pungutan tarif dokumen keimigrasian di KBRI Kuala Lumpur Tahun 2000 s.d 2003 atas nama tersangka Hadi A Wayarabi dan Suparba W Amiarsa (Duta besar RI untuk Malaysia dan KAbid. Imigrasi KBBRI Kuala Lumpur Malaysia)
6. TPK pengelolaan dana PNBPN terkait pungutan tarif dokumen keimigrasian di KBRI Kuala Lumpur Tahun 2004 s.d 2005 atas nama Arihken Tarigan dan Rushihardjo (Kabid. Imigrasi KBRI Kuala Lumpur dan Mantan Dubes RI untuk Malaysia)
7. TPK Proyek Peningkatan Kelembagaan dan Sarana dalam pengadaan tanah di BAPETEN Tahun 2004 atas nama tersangka Sugiyo Prasojo (Pimpro Pembangunan Pusdiklat Bapeten)
8. TPK Proyek Pengadaan Mobil Pemadam Kebakaran Merk Tohatsu Tipe V-80-ASM di Pemerintah Kota Makassar APBD Tahun 2003 dan 2004 atas nama tersangka Baso Amiruddin Maula (Walikota Makassar)
9. TPK Proyek Pengadaan Mobil Pemadam Kebakaran Merk MORITA di Pemerintah Kota Medan APBD Tahun 2005 atas nama tersangka Abdillah dan Ramli (Walikota dan Wakil Walikota Medan)
10. TPK Proyek Pengadaan Mobil Pemadam Kebakaran Merk Tohatsu Tipe V-80-ASM dan Merk Tohatsu Tipe V-80-ASM di Pemerintah Provinsi/Kota/Kabupaten Jawa Barat, Bali, Riau, Bengkulu,

- Medan dan Makassar. Dengan menggunakan anggaran APBN dan APBD Tahun 2003 s.d 2005 atas nama tersangka Samuel Hengki Daud (Swasta)
11. TPK Proyek Pengadaan Mobil Pemadam Kebakaran Merk Tohatsu Tipe V-80-ASM dan Merk Tohatsu Tipe V-80-ASM di Pemerintah Provinsi Kalimantan Timur APBD Tahun 2003 dan 2005 atas nama tersangka Ismed Rusdany (Setda Kalimantan Timur)
  12. TPK Proyek Pekerjaan Pemeriksaan Penggunaan TKA / Audit Investigasi pada 46 Kab/Kota TA 2004 pada Ditjen PPK Depnakertrans atas nama tersangka Marudin Saur Marulitua Simanihuruk dan Suseno Cipto Mantoro (Dirjen Pembinaan Dan Pengawasan Ketenagakerjaan Depnakertrans dan Mantan Atasan Langsung Bendaharawan DPKKTKI Ditjen PPK Dep. Nakertrans T.A. 2004)
  13. TPK PNS atau Penyelenggara Negara yang menerima hadiah berkaitan dengan kekuasaan atau kewenangan yang berhubungan dengan jabatannya atas nama tersangka Tengku Azmun Jaafar (Bupati Pelalawan)
  14. TPK penyalahgunaan perijinan dalam penerbitan IUP HHK-HT/IPK tahun 2001 sd 2006 di wilayah Kabupaten Pelalawan kepada sejumlah perusahaan tidak sesuai dengan ketentuan yang berlaku atas nama tersangka Tengku Azmun Jaafar (Bupati Pelalawan)
  15. TPK penyimpangan penggunaan dana APBD Garut TA 2004 s.d 2007 atas nama tersangka Agus Supriadi (Bupati Garut)
  16. TPK pengadaan perahu mesin dan alat tangkap menggunakan APBNP Tahun 2006 di Dinas Perikanan dan Kelautan Provinsi Jawa Tengah atas nama tersangka Margaretha Elisabeth Tutuarima (Pejabat Pembuat Komitmen/Kasi Produksi Penangkapan Ikan)
  17. TPK pengadaan perahu mesin dan alat tangkap menggunakan APBNP Tahun 2006 di Dinas Perikanan dan Kelautan Provinsi Jawa Tengah atas nama tersangka Hadi Purnomo (Kepala Dinas Perikanan dan Kelautan Jawa Tengah)
  18. TPK pengadaan mobil Pemadam Kebakaran Type V 80 ASM TA 2003-2005 di Pemerintahan Provinsi Riau atas nama tersangka Saleh Djasit (Anggota DPR RI/Mantan Gubernur Prop Riau)
  19. TPK penyalahgunaan Anggaran Pendapatan dan Belanja Daerah Kabupaten Kutai Kartanegara atas nama tersangka Vonnie A Panambunan (Bupati Minahasa Utara)
  20. TPK penyuapan atau pemberian sejumlah uang kepada pegawai negeri/ penyelenggara negara atas nama tersangka Irawady Yoenoes (Anggota Komisi Yudisial)
  21. TPK penyuapan atau pemberian sejumlah uang kepada pegawai negeri/ penyelenggara negara atas nama tersangka Freddy Santoso (Swasta)
  22. TPK pengadaan peningkatan fasilitas mesin dan peralatan latihan di UPT/BLK Depnakertrans atas nama tersangka Taswin Zein (Kasubdit Pengembangan Sistem dan Inovasi Direktorat Produktivitas Ditjen Pembinaan Pelatihan dan Produktivitas)
  23. TPK Penyalahgunaan APBD Pemerintah Kota Medan T.A. 2002 – 2006 atas nama tersangka Abdillah dan Ramli (Walikota dan Wakil Walikota Medan)
  24. TPK Penerimaan uang tunai dan bilyet giro pada pengurusan anggaran untuk kegiatan Proyek Peningkatan Kelembagaan dan Sarana BAPETEN tahun 2004 atas nama tersangka Noor Adenan Razak (Anggota DPR RI)

[f Share](#)[Tweet](#)

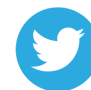

@KPK\_RI ([https://twitter.com/kpk\\_ri](https://twitter.com/kpk_ri)) : KPK kembali menyelenggarakan Lomba Penghargaan Unit Per  
t.co/TXo2wE44Be (<https://t.co/TXo2wE44>)

---

## Tentang KPK

Visi dan Misi (/id/tentang-kpk/sekilas-kpk)  
Fungsi dan Tugas (/id/tentang-kpk/fungsi-dan-tugas)  
Struktur Organisasi (/id/layanan-informasi-publik/laporan-harta-kekayaan-penyelenggaraan-negara/informasi-berkala/informasi-berkaitan-badan-publik/struktur-organisasi)  
Pejabat Struktur KPK (/id/tentang-kpk/pejabat-struktural)  
Rencana Strategis (/id/tentang-kpk/roadmap-dan-rencana-strategis)  
Profil Pimpinan (/id/layanan-informasi-publik/laporan-harta-kekayaan-penyelenggaraan-negara/informasi-berkala/informasi-berkaitan-badan-publik/profil-pimpinan-kpk)  
Undang - Undang Pendukung (/id/layanan-informasi-publik/laporan-harta-kekayaan-penyelenggaraan-negara/informasi-berkala/undang-undang-pemberantasan-tindak-pidana-korupsi)

---

## Indeks Berita

Siaran Pers (/id/berita/siaran-pers)  
Berita KPK (/id/berita/berita-kpk)  
Publik Bicara (/id/berita/publik-bicara)

---

## Layanan Publik

Pengaduan Masyarakat (/id/layanan-publik/pengaduan-masyarakat/mengenal-pengaduan-masyarakat)  
LHKPN (/id/layanan-publik/laporan-harta-kekayaan-penyelenggaraan-negara/mengenal-lhkpn)  
Gratifikasi (/id/layanan-publik/gratifikasi/mengenal-gratifikasi)  
Informasi Publik (/id/layanan-publik/informasi-publik)

---

## Publikasi

Laporan Keuangan (/id/publikasi/laporan-keuangan)  
Laporan Tahunan (/id/publikasi/laporan-tahunan)

## Kontak KPK

---

### GEDUNG KPK

Jln. Kuningan Persada Kav. 4

Jakarta Selatan 12950

Telp : (021) 2557 8300

Faks : (021) 2557 8333

**Call Center: 198**

Email : [informasi@kpk.go.id](mailto:informasi@kpk.go.id)

---

Hak Cipta © 2019 Komisi Pemberantasan Korupsi. Semua Hak Dilindungi.

## **BERSAMA KPK BERANTAS KORUPSI**

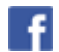

(<https://www.facebook.com/KomisiPemberantasanKorupsi>)

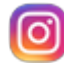

(<https://www.instagram.com/official.kpk>)

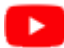

(<https://www.youtube.com/user/HUMASKPK>)
