# Supplementary material for: Democratization, leader education and growth: firm-level evidence from Indonesia
Source: Springer Nature journal article supplement (doi:10.1007/s10887-022-09221-5), 2023-02-15
Supplement: MOESM2 [file Penyidikan 2008.pdf › Data/Mayor-level corruption dataset (incl sources)/KPK Penyidikan 2006-/Penyidikan 2008.pdf]

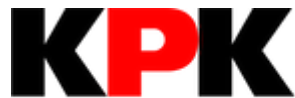

Komisi Pemberantasan Korupsi

[\(https://www.kpk.go.id/\)](https://www.kpk.go.id/)▼  Bahasa Indonesia

## Penyidikan

### Penyidikan 2008 (/id/publikasi/penanganan-perkara/penyidikan/699-penyidikan-2008)

📁 Penyidikan (/id/publikasi/penanganan-perkara/penyidikan) 📅 30 Desember 2008

Sepanjang tahun 2008, kegiatan penyidikan yang dijalankan oleh KPK sebanyak 47 (empat puluh tujuh) perkara

1. TPK kegiatan Pembinaan dan Pengembangan Perikanan Tangkap TA 2006 di Dinas Perikanan Provinsi Jawa Barat atas nama tersangka Asep Hatiyoman dan Ade Kusmana (Kuasa Pengguna Anggaran/PPK dan Kasubid. SDA Badan Penelitian dan Pengembangan Daerah Provinsi Jawa Barat)
2. TPK proyek pembangunan dan rehabilitasi gedung perwakilan Pemprov Jambi di DKI Jakarta TA 2004 atas nama tersangka Abdul Chalik Saleh (Sekretaris Daerah Riau)
3. TPK dalam penggunaan dana BI yang dikelola oleh YPPI untuk kepentingan BI dengan tidak melalui mekanisme penganggaran dan pertanggungjawaban sesuai dengan ketentuan yang berlaku atas nama tersangka Burhanuddin Abdullah Gubernur Bank Indonesia
4. TPK dalam penggunaan dana BI yang dikelola oleh YPPI untuk kepentingan BI dengan tidak melalui mekanisme penganggaran dan pertanggungjawaban sesuai dengan ketentuan yang berlaku atas nama tersangka Oey Hoey Tiong dan Rusli Simanjuntak (Deputi Direktur Hukum BI dan Kepala Biro BI cabang Surabaya)
5. Perkara TPK dalam permintaan dan penerimaan sejumlah dana terkait dengan proses permohonan alih fungsi hutan lindung pantai air Telang Sumatera Selatan atas nama tersangka Sarjan Tahir (Anggota DPR)
6. Perkara TPK terkait Pegawai Negeri atau Penyelenggara Negara yang menerima hadiah atau janji yang bertentangan dengan kewajibannya atas nama tersangka Urip Tri Gunawan (Jaksa Kejaksaan Agung)
7. Perkara TPK terkait setiap orang yang memberi hadiah atau janji kepada pegawai negeri atas nama tersangka Artalyta Suryani (Swasta)
8. Perkara TPK penyalahgunaan anggaran bantuan sosial Kabupaten Kutai Kartanegara tahun 2005 atas nama tersangka Samsuri Aspar (Wakil Bupati Kutai Kartanegara (Eselon I)/Plt. Bupati Kutai Kartanegara)
9. Perkara TPK pada ruislag tanah dan bangunan eks kantor Bupati Lombok Barat tahun 2004 atas nama tersangka Iskandar (Bupati Lombok Barat)

10. Perkara TPK pada ruislag tanah dan bangunan eks kantor Bupati Lombok Barat tahun 2004 atas nama tersangka Izzat Husein (Swasta)
11. Perkara TPK yaitu pegawai negeri atau penyelenggara negara yang menerima hadiah atau janji yang bertentangan dengan kewajibannya atas nama tersangka M Al Amin Nur Nasution (Anggota DPR)
12. Perkara TPK yaitu pegawai negeri atau penyelenggara negara yang menerima hadiah atau janji yang bertentangan dengan kewajibannya atas nama tersangka Azirwan (Sekretaris daerah Bintan)
13. Perkara TPK yaitu pegawai negeri atau penyelenggara negara yang telah menerima pemberian sejumlah uang dari Bank Indonesia dalam rangka penyelesaian Bantuan Likuidasi Bank Indonesia (BLBI) secara politis dan amandemen Undang-Undang Bank Indonesia atas nama tersangka (Hamka Yandhu dan Antony Zeidra Abidin (Anggota DPR dan Mantan Anggota DPR/ Wakil Gubernur Jambi)
14. Perkara TPK renovasi gedung KBRI Singapura, Wisma Dubes, Wisma DCM dan rumah-rumah dinas TA 2003 atas nama tersangka Mochamad Slamet Hidayat (Mantan Dubes RI untu Singapura)
15. Perkara TPK renovasi gedung KBRI Singapura, Wisma Dubes, Wisma DCM dan rumah-rumah dinas TA 2003 atas nama tersangka Erizal (Mantan Bendaharawan KBRI Singapura)
16. Perkara TPK atas penerbitan radiogram dalam pengadaan mobil pemadam kebakaran dengan menggunakan pompa merk Tohatsu Type V 80 ASM dan pembebasan bea masuk/ pajak mobil pemadam kebakaran merk Morita di beberapa pemprov/ pemkab/ Pemkot dengan pembayaran bersumber dari APBD TA 2002 sd 2005 atas nama tersangka Oentarto Sindung Mawardi (Mantan Dirjen Otonomi Daerah Departemen Dalam Negeri)
17. Perkara TPK atas penyimpangan atau rekayasa dalam kegiatan rehabilitasi dan rekonstruksi sektor perikanan tangkap pasca gempa dan gelombang tsunami pada satuan kerja Dinas Perikanan dan Kelautan Provinsi Jawa Barat yang menggunakan APBN-P tahun 2006 atas nama tersangka David Kurniawan Wiranata (Swasta)
18. Perkara TPK turut serta terkait perbuatan H Tengku Azmun Jaafar, SH (Bupati Pelalawan) Dkk, melakukan TPK terkait dengan penilaian dan pengesahan RKT UPHHKHT pada areal yang diberikan IUPHHKT-HT Tahun 2001 sd 2006 di wilayah Kabupaten Pelalawan atas nama tersangka Syuhada Tasman (Mantan Kepala Dinas Kehutanan Riau)
19. Perkara TPK turut serta terkait perbuatan H Tengku Azmun Jaafar, SH (Bupati Pelalawan) Dkk, melakukan TPK terkait dengan penilaian dan pengesahan RKT UPHHKHT pada areal yang diberikan IUPHHKT-HT Tahun 2001 sd 2006 di wilayah Kabupaten Pelalawan atas nama tersangka Asral Rachman (Mantan Kepala Dinas Kehutanan Riau)
20. Perkara TPK turut serta terkait perbuatan H Tengku Azmun Jaafar, SH (Bupati Pelalawan) Dkk, melakukan TPK terkait dengan penilaian dan pengesahan RKT UPHHKHT pada areal yang diberikan IUPHHKT-HT Tahun 2001 sd 2006 di wilayah Kabupaten Pelalawan atas nama tersangka Burhanuddin Husin (Mantan Kepala Dinas Kehutanan Riau)
21. Perkara TPK turut serta terkait perbuatan Taswin Zein dkk, dalam proyek pengembangan sistem pelatihan dan pemagangan yang sumber dananya berasal dari ABT DIKS TA 2004 pada Dirjen Pembinaan Pelatihan dan Penempatan Tenaga Kerja dan Transmigrasi RI atas nama tersangka Bachrun Effendi (Mantan Sekretaris Direktorat Jenderal Pembinaan Penempatan Tenaga Kerja Dalam Negeri (PPTKDN) Departemen Tenaga Kerja dan Transmigrasi RI)
22. Perkara TPK turut serta terkait perbuatan Taswin Zein dkk, dalam proyek pengembangan sistem pelatihan dan pemagangan yang sumber dananya berasal dari ABT DIKS TA 2004 pada Dirjen Pembinaan Pelatihan dan Penempatan Tenaga Kerja dan Transmigrasi RI atas nama tersangka Mulyono Subroto (Swasta)
23. Perkara TPK turut serta terkait perbuatan Taswin Zein dkk, dalam proyek pengembangan sistem pelatihan dan pemagangan yang sumber dananya berasal dari ABT DIKS TA 2004 pada Dirjen Pembinaan Pelatihan dan Penempatan Tenaga Kerja dan Transmigrasi RI atas nama tersangka Erry Fuad (Swasta)

24. Perkara TPK turut serta terkait perbuatan Taswin Zein dkk, dalam proyek pengembangan sistem pelatihan dan pemagangan yang sumber dananya berasal dari ABT DIKS TA 2004 pada Dirjen Pembinaan Pelatihan dan Penempatan Tenaga Kerja dan Transmigrasi RI atas nama tersangka Ines Wulanari Setywati (Swasta)
25. Perkara TPK turut serta terkait perbuatan Taswin Zein dkk, dalam proyek pengembangan sistem pelatihan dan pemagangan yang sumber dananya berasal dari ABT DIKS TA 2004 pada Dirjen Pembinaan Pelatihan dan Penempatan Tenaga Kerja dan Transmigrasi RI atas nama tersangka Vaylana Dharmawan (Swasta)
26. Perkara TPK turut serta terkait perbuatan Taswin Zein dkk, dalam proyek pengembangan sistem pelatihan dan pemagangan yang sumber dananya berasal dari ABT DIKS TA 2004 pada Dirjen Pembinaan Pelatihan dan Penempatan Tenaga Kerja dan Transmigrasi RI atas nama tersangka Karnawi (Swasta)
27. Perkara TPK dalam pengelolaan dana PNBPN terkait pungutan tarif dokumen keimigrasian di KJRI kota Kinabalu tahun 1999 sd 2000 atas nama tersangka Arifin Hamzah (Konjen RI Kota Kinabalu), Radite Edyatmo (Kepala Bidang Konsuler Ekonomi), Ayi Nugraha (Ka Subid Imigrasi), Kamso Simatupang (Ka Subid Imigrasi)
28. Perkara TPK dalam pengelolaan dana PNBPN terkait pungutan tarif dokumen keimigrasian di KJRI kota Kinabalu tahun 1999 sd 2000 atas nama tersangka Muchamad Sukarna (Konjen RI Kota Kinabalu), Mas Tata Machron (Kabid Konsuler), Irsyafi Rasoel (Ka Subid Imigrasi), Makdum Tahir (Ka Subid Imigrasi)
29. Perkara TPK dalam pengelolaan dana PNBPN terkait pungutan tarif dokumen keimigrasian di KJRI kota Kinabalu tahun 1999 sd 2000 atas nama tersangka Kurniawan Roebadi (Konjen RI Kota Kinabalu)
30. Perkara TPK penyalahgunaan anggaran bantuan sosial kabupaten Kutai Kertanegara tahun 2005 dan 2006 atas nama tersangka Setia Budi (Anggota DPRD Kutai Kartanegara)
31. Perkara TPK pegawai negeri atau penyelenggara negara yang menerima hadiah atau janji yang berhubungan dengan jabatan atas nama tersangka Bulyan Royan (Anggota DPR RI)
32. Perkara TPK sehubungan dengan permintaan dan penerimaan sejumlah dana terkait dengan Proses Permohonan Alih Fungsi Hutan Lindung Pantai Air Telang Sumsel atas nama tersangka HM Yusuf Erwin Faishal (Anggota DPR RI)
33. Perkara TPK setiap orang memberikan dan atau menjanjikan sesuatu kepada pegawai negeri atau penyelenggara negara yang berhubungan dengan jabatan atau kewajibannya atas nama tersangka Dedy Suwarsono (Swasta)
34. Perkara TPK dalam penyalahgunaan kewenangan yang menimbulkan kerugian negara di Kabupaten Yapen Waropen tahun 2005 – 2006 atas nama tersangka Daud Solleman Betawi (Bupati Yapen Waropen)
35. Perkara TPK pengadaan mobil pemadam kebakaran, mobil ambulan, stoom walls dan dump truck oleh pemerintah Jawa Barat tahun 2003 dan 2004 atas nama tersangka Danny Setyawan (Mantan Gubernur Jawa Barat)
36. Perkara TPK sehubungan dengan pemberian sejumlah dana kepada pegawai negeri atau penyelenggara negara terkait dengan proses permohonan alih fungsi hutan lindung pantai air telang Sumsel atas nama tersangka Chandra Antonio Tan (Swasta)
37. Perkara TPK pengadaan mobil pemadam kebakaran, mobil ambulan, stoom walls dan dump truck oleh pemerintah Jawa Barat tahun 2004 atas nama tersangka Dany Setyawan (Mantan Gubernur Jawa Barat)
38. Perkara TPK dalam pengadaan mobil pemadam kebakaran, mobil ambulance, mobil tangga, stoom walls, backhoe loader dan dump truck pada tahun 2004 yang dilaksanakan oleh Pem Prov Jabar atas nama tersangka Yusuf Setiawan (Swasta)

39. Perkara TPK pegawai negeri atau penyelenggara negara yang menerima hadiah atau janji yang berhubungan dengan jabatan atas nama tersangka Mohamad Iqbal (Anggota KPPU)
40. Perkara TPK setiap orang memberikan dan atau menjanjikan sesuatu kepada pegawai negeri atau penyelenggara negara yang berhubungan dengan jabatan atau kewajibannya atas nama tersangka Billy Sindoro (Swasta)
41. Perkara TPK berupa penerimaan sejumlah uang terkait dengan proses impor barang yang masuk atau diperiksa oleh pejabat fungsional pemeriksa dokumen (PFPD) jalur hijau pada kantor pelayanan utama (KPU) Bea dan Cukai Tanjung Priok atas nama tersangka Agus Saffin Pane (Pejabat Fungsional Pemeriksa Dokumen (PFPD))
42. Perkara TPK dalam pengelolaan APBD Pemerintah Kabupaten Aceh Tenggara TA 2004-2006 atas nama tersangka Armen Desky (Bupati Aceh Tenggara)
43. Perkara TPK dalam pelaksanaan kegiatan kerjasama operasi pengadaan, penyimpanan dan penyaluran gula kristal putih antara PT Rajawali Nusantara Indonesia (RNI) dengan Perum Bulog tahun 2001 sd 2004 atas nama Ranendra Dangin (Direktur Keuangan PT RNI)
44. Perkara TPK penyalahgunaan anggaran pendapatan dan belanja daerah (APBD) Pemerintah Kota Manado TA 2006 atas nama tersangka Jimmy Rimba Rogi (Bupati Manado)
45. Perkara TPK dalam penggunaan dana Bank Indonesia yang dikelola oleh Yayasan Pengembangan Perbankan Indonesia untuk kepentingan Bank Indonesia dengan tidak melalui mekanisme penganggaran dan pertanggungjawaban atas nama tersangka Aulia T Pohan, Bun Bunan E.J Hutapea, Aslim Tadjuddin, dan Maman Husein Somantri (Mantan Deputi Dewan Gubernur Bank Indonesia)
46. TPK berupa penyelenggara negara menerima sesuatu, hadiah atau janji yang terjadi pada Strategic Business Unit (SBU) II wilayah Jawa Bagian Timur PT Perusahaan Gas Negara (Persero) Tbk atas nama tersangka Trijono (General Manager PT PGN – SBU II Jabati)
47. TPK Penyalahgunaan APBD Kabupaten Situbondo TA 2005 – 2007 atas nama tersangka Ismono (Bupati Situbondo)

**f Share**

Tweet

You are here: / Publikasi / Penanganan Perkara (/id/publikasi/penanganan-perkara)  
/ Penyidikan (/id/publikasi/penanganan-perkara/penyidikan) / Penyidikan 2008

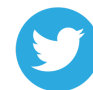

@KPK\_RI ([https://twitter.com/kpk\\_ri](https://twitter.com/kpk_ri)) : #KawanAksi juga dapat menyimak Data LHK Kepala Daerah Provinsi :

Visi dan Misi (/id/tentang-kpk/sekilas-kpk)  
Fungsi dan Tugas (/id/tentang-kpk/fungsi-dan-tugas)  
Struktur Organisasi (/id/layanan-informasi-publik/laporan-harta-kekayaan-penyelenggaraan-negara/informasi-berkala/informasi-berkaitan-badan-publik/struktur-organisasi)  
Pejabat Struktur KPK (/id/tentang-kpk/pejabat-struktural)  
Rencana Strategis (/id/tentang-kpk/roadmap-dan-rencana-strategis)  
Profil Pimpinan (/id/layanan-informasi-publik/laporan-harta-kekayaan-penyelenggaraan-negara/informasi-berkala/informasi-berkaitan-badan-publik/profil-pimpinan-kpk)  
Undang - Undang Pendukung (/id/layanan-informasi-publik/laporan-harta-kekayaan-penyelenggaraan-negara/informasi-berkala/undang-undang-pemberantasan-tindak-pidana-korupsi)

Siaran Pers (/id/berita/siaran-pers)  
Berita KPK (/id/berita/berita-kpk)  
Publik Bicara (/id/berita/publik-bicara)

---

## Layanan Publik

Pengaduan Masyarakat (/id/layanan-publik/pengaduan-masyarakat/mengenal-pengaduan-masyarakat)  
LHKPN (/id/layanan-publik/laporan-harta-kekayaan-penyelenggaraan-negara/mengenal-lhkpn)  
Gratifikasi (/id/layanan-publik/gratifikasi/mengenal-gratifikasi)  
Informasi Publik (/id/layanan-publik/informasi-publik)

---

## Publikasi

Laporan Keuangan (/id/publikasi/laporan-keuangan)  
Laporan Tahunan (/id/publikasi/laporan-tahunan)  
Laporan PIP (/id/publikasi/laporan-pelayanan-informasi-publik)

---

## Kontak KPK

### GEDUNG KPK

Jln. Kuningan Persada Kav. 4

Jakarta Selatan 12950

Telp : (021) 2557 8300

Faks : (021) 2557 8333

**Call Center: 198**

Email : informasi@kpk.go.id

---

Hak Cipta © 2019 Komisi Pemberantasan Korupsi. Semua Hak Dilindungi.

## **BERSAMA KPK BERANTAS KORUPSI**

 (<https://www.facebook.com/KomisiPemberantasanKorupsi>) 

(<https://www.instagram.com/official.kpk>)  (<https://www.youtube.com/user/HUMASKPK>)
