# Supplementary material for: Democratization, leader education and growth: firm-level evidence from Indonesia
Source: Springer Nature journal article supplement (doi:10.1007/s10887-022-09221-5), 2023-02-15
Supplement: MOESM2 [file Penyidikan 2009.pdf › Data/Mayor-level corruption dataset (incl sources)/KPK Penyidikan 2006-/Penyidikan 2009.pdf]

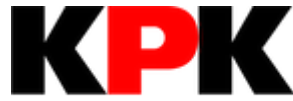

Komisi Pemberantasan Korupsi

(https://www.kpk.go.id/)

▼ Bahasa Indonesia

## Penyidikan

### Penyidikan 2009 (/id/publikasi/penanganan-perkara/penyidikan/698-penyidikan-2009)

📁 Penyidikan (/id/publikasi/penanganan-perkara/penyidikan) 📅 30 Desember 2009

Sepanjang tahun 2009, kegiatan penyidikan yang dijalankan oleh KPK sebanyak 37 (tiga puluh tujuh) perkara

1. TPK dalam pelaksanaan pengadaan alat rontgen portable untuk pelayanan Puskesmas di daerah tertinggal, terpencil, perbatasan dan pulau-pulau kecil di Biro Perencanaan dan Anggaran Sekjen Departemen Kesehatan RI TA 2007 atas nama tersangka Madiono (Kabag Perencanaan pada Biro Perencanaan dan Anggaran Sekjen Depkes selaku PPK)
2. TPK dalam pengadaan kapal patroli pada Ditjen Perhubungan Laut Departemen Perhubungan RI dan atau penerimaan hadiah atau janji yang berhubungan dengan jabatan atas nama tersangka Djoni Al Gamar (Direktur KPLP Departemen Perhubungan) dan Tansean Parlindungan Malau (Kasi Sarana dan Prasarana Operasional Ditjen Perhubungan Laut Departemen Perhubungan)
3. TPK dalam penerimaan uang oleh Auditor BPK- RI terkait Pemeriksaan BPK-RI terhadap Penggunaan DPKK dan Dana Pembinaan Penempatan Penyelenggaraan TKI (DP3TKI) T.A. 2004 pada Ditjen PPTKDN/Binapendagri Depnakertrans pada periode Juli-Agustus 2005 dan dalam Pemeriksaan BPK-RI pada Proyek Pengembangan Sistem Pelatihan dan Pemagangan TA. 2004 pada Ditjen PPTKDN Depnakertrans periode Oktober - Nopember 2005 atas nama tersangka Bagindo Quirino (Kepala Seksi Depnaker Auditorat 1-C BPK RI)
4. TPK dalam pengadaan alat kesehatan untuk Rumah Sakit Kawasan Timur Indonesia (KTI) dan Palang Merah Indonesia (PMI) oleh Dirjen Pelayanan Medik Depkes RI tahun anggaran 2003 atas nama tersangka Gunawan Pranoto (Direktur Utama PT Kimia Farma Tbk) dan Rinaldi Jusuf (Direktur Utama PT Rifa Jaya Mulia)
5. TPK yaitu perbuatan turut serta terhadap pemberian sejumlah dana kepada pegawai negeri atau penyelenggara negara terkait dengan proses permohonan alih fungsi hutan lindung Pantai Air Telang Sumatera Selatan, bersama-sama dengan Chandra Antonio Tan atas nama tersangka Syahrial Oesman (Mantan Gubernur Sumatera Selatan)
6. TPK yaitu pegawai negeri atau penyelenggara negara yang menerima hadiah atau janji padahal diketahui atau patut diduga, bahwa hadiah atau janji tersebut diberikan untuk menggerakkan agar melakukan atau tidak melakukan sesuatu dalam jabatannya, yang bertentangan dengan

kewajibannya atas nama tersangka Abdul Hadi Djamal (Anggota Panitia Anggaran Komisi V Perhubungan DPR RI)

7. TPK yaitu telah memberikan sesuatu kepada pegawai negeri atau penyelenggara negara karena atau berhubungan dengan sesuatu yang bertentangan dengan kewajibannya, dilakukan dalam jabatannya dan atau memberi hadiah atau janji kepada pegawai negeri dengan mengingat kekuasaan atau wewenang yang melekat pada jabatan atau kedudukannya, atau oleh pemberi hadiah atau janji dianggap melekat pada jabatan atau kedudukannya tersebut atas nama tersangka Hontjo Kurniawan (Komisaris PT Kurnia Jaya Wira Bakti)
8. TPK orang yang turut serta terkait perbuatan Hontjo Kurniawan yaitu memberi sesuatu kepada pegawai negeri atau penyelenggara negara karena atau berhubungan dengan sesuatu yang bertentangan dengan kewajibannya, dilakukan dalam jabatannya dan atau memberi hadiah atau janji kepada pegawai negeri dengan mengingat kekuasaan atau wewenang yang melekat pada jabatan atau kedudukannya, atau oleh pemberi hadiah atau janji dianggap melekat pada jabatannya atau kedudukannya atas nama tersangka Darmawati Dareho (staf Tata Usaha Distrik Navigasi Departemen Perhubungan)
9. TPK dalam pengelolaan Dana/Aset Eks Yayasan Dana Tabungan Pensiun Pekerja Pemborong Minyak dan Gas Bumi (YDTP-Migas) Tahun 2003 sampai 2008 atas nama tersangka Muzni Tambusai (Ketua Tim Pelaksana Pengelola Aset ex YDTP Migas)
10. TPK dalam kegiatan pembangunan Pasar Sentral Supiori, terminal induk kabupaten Supiori, Rumah Dinas Eselon Kabupaten Supiori, dan renovasi pasar sentral Supiori untuk kantor cabang Bank Papua dengan menggunakan dana APBD Kabupaten Supiori TA 2006, 2007, dan 2008 atas nama tersangka Jules F. Warikar (Bupati Kab Supiori)
11. TPK dalam kegiatan pembangunan Pasar Sentral Supiori, terminal induk kabupaten Supiori, Rumah Dinas Eselon kabupaten Supiori, dan renovasi pasar sentral supiori untuk kantor cabang bank Papua dengan menggunakan dana APBD kabupaten Supiori TA 2006, 2007, dan 2008 atas nama tersangka Suryadi Sentosa (Swasta)
12. TPK dalam pengadaan Outsourcing Pengelolaan Sistem Manajemen Pelanggan (Customer Managemen System) berbasis teknologi informasi pada PT PLN (Persero) Distribusi Jawa Timur Tahun 2004 – 2008 atas nama tersangka Hariadi Sadono (Direktur Luar Jawa –Madura – Bali PT PLN)
13. TPK sehubungan dengan permintaan dan penerimaan sejumlah dana terkait dengan proses permohonan alih fungsi hutan lindung Pantai Air Telang Sumatera Selatan atas nama tersangka Azwar Chesputra, Hilman Indra, Fachri Andi Leluasa (Anggota DPR)
14. TPK dalam penggunaan dana Kantor Bank Jabar untuk kepentingan pribadi dan atau pihak lain yang terjadi antara tahun 2003 sampai dengan tahun 2005 atas nama tersangka Umar Sjarifuddin (Mantan Direktur Utama Bank Jabar)
15. TPK dalam penggunaan dana Kantor Bank Jabar untuk kepentingan pribadi dan atau pihak lain yang terjadi antara tahun 2003 sampai dengan tahun 2005 atas nama tersangka Uce Karna Suganda (Mantan Direktur Operasi Bank Jabar) dan Abas Suhari Somantro (Mantan Direktur Pemasaran)
16. TPK dalam pengadaan alat kesehatan untuk Rumah Sakit Kawasan Timur Indonesia (KTI) dan Palang Merah Indonesia (PMI) oleh Dirjen Pelayanan Medik Depkes RI tahun anggaran 2003 dari dana ABT atas nama tersangka Achmad Sujudi (Mantan Menteri Kesehatan)
17. TPK yaitu setiap orang dengan tujuan menguntungkan diri sendiri atau orang lain atau suatu korporasi, dengan melawan hukum menyalahgunakan kewenangan, kesempatan atau sarana yang ada padanya karena jabatan atau kedudukan dapat merugikan keuangan negara atau perekonomian negara (penyalahgunaan APBD Kabupaten Natuna TA 2004 yang tidak sesuai dengan peruntukannya dan pengeluaran kas tidak disertai bukti yang lengkap dan sah atas nama tersangka Abdul Hamid Rizal (Bupati Natuna) dan Daeng Rusnadi (Mantan Bupati Natuna)

18. TPK terkait penerbitan ijin usaha pemanfaatan hasil hutan kayu pada hutan tanaman tahun 2001 sampai dengan 2003 di wilayah kabupaten Siak kepada sejumlah perusahaan yang tidak sesuai dengan ketentuan yang berlaku dan mengakibatkan kerugian keuangan negara atau perekonomian negara dan atau menerima hadiah berkaitan dengan kekayaan atau kewenangan yang berhubungan dengan jabatannya atas nama tersangka Arwin AS (Bupati Siak)
19. TPK dalam penerimaan/ pemberian travellers chequ (TC) oleh anggota DPR RI periode 1999-2004 karena atau berhubungan dengan sesuatu yang bertentangan dengan kewajiban, dilakukan atau tidak dilakukan dalam jabatannya berkaitan dengan pemilihan Deputi Senior Bank Indonesia pada tahun 2004 atas nama tersangka Dudhie Makmun Murod (Anggota DPR)
20. TPK dalam penerimaan/ pemberian travellers chequ (TC) oleh anggota DPR RI periode 1999-2004 karena atau berhubungan dengan sesuatu yang bertentangan dengan kewajiban, dilakukan atau tidak dilakukan dalam jabatannya berkaitan dengan pemilihan Deputi Senior Bank Indonesia pada tahun 2004 atas nama tersangka Endin A.J Soefihara (Anggota DPR)
21. TPK dalam penerimaan/ pemberian travellers chequ (TC) oleh anggota DPR RI periode 1999-2004 karena atau berhubungan dengan sesuatu yang bertentangan dengan kewajiban, dilakukan atau tidak dilakukan dalam jabatannya berkaitan dengan pemilihan Deputi Senior Bank Indonesia pada tahun 2004 atas nama tersangka Udju Djuhaeri (Anggota DPR)
22. TPK dalam penerimaan/ pemberian travellers chequ (TC) oleh anggota DPR RI periode 1999-2004 karena atau berhubungan dengan sesuatu yang bertentangan dengan kewajiban, dilakukan atau tidak dilakukan dalam jabatannya berkaitan dengan pemilihan Deputi Senior Bank Indonesia pada tahun 2004 atas nama tersangka Hamka Yandhu (Anggota DPR)
23. TPK kepada tsk Anggoro Widjojo, Dkk. Sehubungan dengan pemberian sejumlah uang kepada anggota Komisi IV DPR RI dan pejabat Departemen Kehutanan RI terkait dengan Proses Pengajuan Anggaran Sistem Komunikasi Radio Terpadu (SKRT) Departemen Kehutanan tahun 2007 – 2008 atas nama tersangka Anggoro Widjojo (Swasta)
24. TPK turut serta dalam pengadaan mobil pemadam kebakaran dengan menggunakan pompa merk Tohatsu Type V 80 ASM dan merk Morita di beberapa Pemprov/ Pemkab/ Pemkot dengan pembayaran bersumber dari APBD Tahun 2002 sd 2005 atas nama Hengki Samuel Daud (Swasta)
25. TPK dalam pengelolaan APBD pada Biro Hukum Sekretariat Daerah Provinsi Daerah Khusus Ibukota Jakarta TA 2006-2007 atas nama tersangka Jurnal Effendi Siahaan (Ka Biro Hukum Sekda Pemprov DKI Jakarta)
26. TPK berupa penyelenggara negara menerima atau memberikan sesuatu, hadiah atau janji, dikarenakan atau dengan menyalahgunakan atau dengan mengingat kekuasaan atau wewenang yang berhubungan atau melekat dengan jabatannya pada PT Perusahaan Gas Negara (Persero) periode tahun 2001 sd 2006 atas nama tersangka Washington Mampe Parulian Simanjuntak (Direksi PT Perusahaan Gas Negara (Persero))
27. TPK dalam pengadaan peralatan kesehatan untuk rumah sakit rujukan penanganan Flu Burung dari DIPA APBN-P Kementerian Koordinator Bidang Kesejahteraan Rakyat TA 2006 atas nama tersangka Soetadjo Yuwono (Sekretaris Menteri Koordinator Bidang Kesejahteraan Rakyat)
28. TPK pengadaan sistem komunikasi radio terpadu untuk bagian anggaran 69 pada sekretariat jenderal departemen Kehutanan RI pada tahun 2006 dan 2007 atas nama tersangka Wandojo Siswanto (Kepala Biro Perencanaan dan Keuangan Setjen Dephut RI (selaku Kuasa Pengguna Anggaran))
29. TPK pengadaan pembangunan sistem komunikasi radio terpadu untuk bagian anggaran 69 pada sekretariat jenderal departemen Kehutanan RI pada tahun 2006 dan 2007 atas nama tersangka Putronefo A Prayugo (Direktur Utama PT Masaro Radiokom)
30. TPK orang yang bersama-sama atau turut serta pada perkara TPK dalam pengadaan Outsourcing Pengelolaan Sistem Manajemen Pelanggan (Customer Management System) berbasis teknologi

Informasi pada PT PLN (Persero) distribusi Jawa Timur Tahun 2004-2008 atas nama tersangka R. Saleh Abdul Malik, Achmad Fathony Zakaria, dan Arthur Pelupessy (Swasta)

31. TPK orang yang secara bersama- sama atau turut serta terkait perbuatan Madiono dkk dalam pelaksanaan pengadaan alat rontgen portable untuk pelayanan Puskesmas di daerah tertinggal, terpencil, perbatasan dan pulau-pulau kecil di Biro Perencanaan dan Anggaran Sekjen Departemen Kesehatan RI TA 2007, atas nama tersangka Edi Suranto (Direktur Bina Kesehatan Komunitas Ditjen Bina Kesehatan masyarakat Depkes RI Tahun 2007)
32. TPK orang yang secara bersama- sama atau turut serta terkait perbuatan Madiono dkk dalam pelaksanaan pengadaan alat rontgen portable untuk pelayanan Puskesmas di daerah tertinggal, terpencil, perbatasan dan pulau-pulau kecil di Biro Perencanaan dan Anggaran Sekjen Departemen Kesehatan RI TA 2007 atas nama tersangka Budiarto Maliang (Mantan Komisaris PT. Kimia Farma Trading & Distribution)
33. TPK dalam pengadaan Mobil Pemadam kebakaran Merek Morita Tahun Anggaran 2004 dan 2005 di Otorita Pengembangan Daerah Industri Pulau Batam atas nama tersangka Ismeth Abdullah (Ketua Otorita Batam)
34. TPK dalam pengadaan Jasa Angkutan KRL Hibah Ex. Jepang Tahun 2006 s.d 2007 atas nama tersangka Soemino Eko Saputro (Direktur Jenderal Perkeretaapian Departemen Perhubungan RI Periode Tahun 2005 s.d 2007)
35. TPK dalam pengadaan tanah untuk pasar pada pemerintah kabupaten Brebes TA 2003 atas nama tersangka Indra Kusuma (Bupati Brebes)
36. TPK penerimaan hadiah oleh pemeriksa pajak Bank Jabar pada tahun 2004 sebagai imbalan atas pengurangan jumlah pajak kurang bayar Bank Jabar tahun buku 2002 atas nama tersangka Eddi Setiadi (Mantan Kepala Kantor Pemeriksaan dan Penyidikan Pajak Bandung Satu)
37. TPK bersama-sama atau turut serta dalam TPK berupa penerimaan dana taktis pada kegiatan proyek pembangunan jaringan distribusi gas (Pemjadig) yang menggunakan APBN tahun anggaran 2003 yang dilakukan oleh tsk Washington Mampe Parulian Simanjuntak atas nama tersangka Djoko Pramono (Direktur Keuangan PT PGN Persero periode tahun 2001 – 2006)

**f** Share

Tweet

You are here: / Publikasi / Penanganan Perkara (/id/publikasi/penanganan-perkara)  
/ Penyidikan (/id/publikasi/penanganan-perkara/penyidikan) / Penyidikan 2009

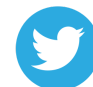

@KPK\_RI ([https://twitter.com/kpk\\_ri](https://twitter.com/kpk_ri)) : Selengkapnya dapat #KawanAksi baca melalu

Visi dan Misi (/id/tentang-kpk/sekilas-kpk)  
Fungsi dan Tugas (/id/tentang-kpk/fungsi-dan-tugas)  
Struktur Organisasi (/id/layanan-informasi-publik/laporan-harta-kekayaan-penyelenggaraan-negara/informasi-berkala/informasi-berkaitan-badan-publik/struktur-organisasi)  
Pejabat Struktur KPK (/id/tentang-kpk/pejabat-struktural)  
Rencana Strategis (/id/tentang-kpk/roadmap-dan-rencana-strategis)  
Profil Pimpinan (/id/layanan-informasi-publik/laporan-harta-kekayaan-penyelenggaraan-negara/informasi-berkala/informasi-berkaitan-badan-publik/profil-pimpinan-kpk)  
Undang - Undang Pendukung (/id/layanan-informasi-publik/laporan-harta-kekayaan-penyelenggaraan-negara/informasi-berkala/undang-undang-pemberantasan-tindak-pidana-korupsi)

Siaran Pers (/id/berita/siaran-pers)  
Berita KPK (/id/berita/berita-kpk)  
Publik Bicara (/id/berita/publik-bicara)

---

## Layanan Publik

Pengaduan Masyarakat (/id/layanan-publik/pengaduan-masyarakat/mengenal-pengaduan-masyarakat)  
LHKPN (/id/layanan-publik/laporan-harta-kekayaan-penyelenggaraan-negara/mengenal-lhkpn)  
Gratifikasi (/id/layanan-publik/gratifikasi/mengenal-gratifikasi)  
Informasi Publik (/id/layanan-publik/informasi-publik)

---

## Publikasi

Laporan Keuangan (/id/publikasi/laporan-keuangan)  
Laporan Tahunan (/id/publikasi/laporan-tahunan)  
Laporan PIP (/id/publikasi/laporan-pelayanan-informasi-publik)

---

## Kontak KPK

### GEDUNG KPK

Jln. Kuningan Persada Kav. 4

Jakarta Selatan 12950

Telp : (021) 2557 8300

Faks : (021) 2557 8333

**Call Center: 198**

Email : [informasi@kpk.go.id](mailto:informasi@kpk.go.id)

---

Hak Cipta © 2019 Komisi Pemberantasan Korupsi. Semua Hak Dilindungi.

## **BERSAMA KPK BERANTAS KORUPSI**

 (<https://www.facebook.com/KomisiPemberantasanKorupsi>) 

(<https://www.instagram.com/official.kpk>)  (<https://www.youtube.com/user/HUMASKPK>)
