# Supplementary material for: Democratization, leader education and growth: firm-level evidence from Indonesia
Source: Springer Nature journal article supplement (doi:10.1007/s10887-022-09221-5), 2023-02-15
Supplement: MOESM2 [file Penyidikan 2010.pdf › Data/Mayor-level corruption dataset (incl sources)/KPK Penyidikan 2006-/Penyidikan 2010.pdf]

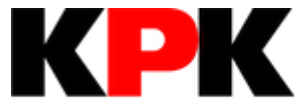

Komisi Pemberantasan Korupsi

[\(https://www.kpk.go.id/\)](https://www.kpk.go.id/)▼  Bahasa Indonesia

## Penyidikan

### Penyidikan 2010 (/id/publikasi/penanganan-perkara/penyidikan/697-penyidikan-2010)

 Penyidikan (/id/publikasi/penanganan-perkara/penyidikan)  30 Desember 2010

Sepanjang tahun 2010, kegiatan penyidikan yang dijalankan oleh KPK sebanyak 40 (empat puluh) perkara

1. TPK terkait perbuatan melakukan, menyuruh melakukan, turut serta melakukan perbuatan dengan sengaja mencegah atau merintangi atau menggagalkan secara langsung atau tidak langsung penyidikan, penuntutan, dan pemeriksaan disidang pengadilan thd tersangka atau terdakwa ataupun para saksi dalam perkara korupsi, dan atau perbuatan melakukan percobaan memberi atau menjanjikan sesuatu kepada pimpinan KPK dan atau pegawai KPK, pembantuan atau pemufakatan jahat untuk melakukan TPK atas nama tersangka Anggodo Widjojo (Swasta)
2. TPK dalam pengadaan mesin jahit dan sapi impor pada bagian proyek pengentasan fakir miskin Departemen Sosial pada tahun 2004 dan 2006 atas nama tersangka Bachtiar Chamsyah (Mantan Menteri Sosial 2004-2009)
3. TPK pada proyek pembangunan jalan Palembang – Tanjung Api-api Sumatera Selatan TA 2005 – 2008 atas nama tersangka Dharnan Dachlan (Kadis PU Bina Marga Sumatera Selatan)
4. TPK penyalahgunaan dana APBD dan OTSUS Pemda Kabupaten Boven Digoel Prop Papua TA 2006-2007 atas nama tersangka Yusak Yaluwo (Bupati Pemda Kab Boven Digoel tahun 2004-2009)
5. TPK dalam pengadaan sarung yang dananya berasal dari pengelolaan rekening pemerintah pada Departemen Sosial pada tahun 2006-2008 atas nama tersangka Bachtiar Chamsyah (Menteri Sosial RI periode 2004-2009)
6. TPK sebagai orang yang bersama-sama atau turut serta dalam perkara TPK dalam pengadaan mesin jahit pada bagian proyek pengentasan fakir miskin Depsos Tahun 2004 dan 2006, yang dilakukan oleh tersangka Bachtiar Chamsyah selaku Menteri Sosial Republik Indonesia periode 2004-2009 atas nama tersangka Musfar Aziz (Swasta)
7. TPK sebagai orang yang bersama-sama atau turut serta dalam perkara TPK dalam pengadaan sarung yang dananya berasal dari pengelolaan rekening pemerintah pada Depsos Tahun 2006-2008 yang dilakukan oleh tersangka Bachtiar Chamsyah selaku Menteri Sosial Republik Indonesia periode 2004-2009 atas nama tersangka Cep Ruhyat (Swasta)
8. TPK dalam pengadaan Roll Out Customer Information System – Rencana Induk Sistem Informasi (CIS – RISI) pada PT PLN (Persero) Distribusi Jakarta Raya dan Tangerang atas nama tersangka Eddie Widiono Suwondho (Direktur PLN)

9. TPK sebagai orang yang bersama-sama atau turut serta atau membantu tersangka Bachtiar Chamsyah selaku Menteri Sosial Republik Indonesia periode 2004-2009 melakukan TPK pada pengadaan sapi impor di bagian proyek pengentasan fakir miskin Depsos tahun 2004 dan 2006 atas nama tersangka Iken B.R Nasution (Swasta)
10. TPK yaitu setiap orang yang secara melawan hukum melakukan perbuatan memperkaya diri sendiri atau orang lain atau suatu korporasi, ada padanya karena jabatan atau kedudukannya atas nama tersangka Budi Harsono (General Manager PT PLN (Persero) wilayah Lampung)
11. TPK terkait dengan memberi atau menjanjikan sesuatu kepada Hakim atau pegawai negeri atau penyelenggara negara dengan maksud supaya berbuat atau tidak berbuat sesuatu dalam jabatannya yang bertentangan dengan kewajibannya atas nama tersangka Adner Sirait (Kuasa Hukum)
12. TPK terkait dengan Hakim atau pegawai negeri atau penyelenggara negara yang menerima hadiah, pemberian atau janji atas nama tersangka Ibrahim (Hakim Pengadilan Tinggi Tata Usaha Negara)
13. TPK dalam penyalahgunaan dan pengelolaan kas daerah Kabupaten Langkat serta penyalahgunaan penggunaan APBD Kabupaten Langkat pada tahun 2000-2007 atas nama tersangka Syamsul Arifin (Gubernur Sumatera Utara)
14. TPK sebagai orang yang turut serta atau bersama-sama terkait perbuatan Budiarto Maliang dan Edi Suranto dkk dalam pelaksanaan pengadaan alat Rontgen Portable untuk pelayanan Puskesmas di daerah tertinggal, terpencil, perbatasan dan pulau-pulau kecil di Biro Perencanaan dan Anggaran Sekjen Depkes RI tahun 2007 atas nama tersangka Sja'fii Ahmad (Mantan Sekretaris Jenderal Departemen KEsehatan 2004-2009)
15. TPK sebagai orang yang turut serta atau bersama-sama terkait perbuatan Adner Sirait dalam tindak pidana memberi atau menjanjikan sesuatu kepada Hakim atau pegawai negeri atau penyelenggara negara dengan maksud supaya berbuat atau tidak berbuat sesuatu dalam jabatannya yang bertentangan dengan kewajibannya atau karena berhubungan dengan sesuatu yang bertentangan dengan kewajibannya atas nama tersangka Darianus Lungguk Sitorus (Swasta)
16. TPK dalam pelaksanaan pengadaan peralatan medik dari sisa dana pelayanan kesehatan bagi penduduk miskin dalam rangka wabah flu burung (Avian Influenza) pada Dirjen Bina Pelayanan Medik Departemen Kesehatan TA 2006 dan dalam pelaksanaan pengadaan peralatan kesehatan penanganan wabah flu burung (Avian Influenza) dana APBN-P sekretariat Dirjen Bina Pelayanan Medik Depkes TA 2006 atas nama tersangka Mulya A Hasjmy (Sesditjen Bina Pelayanan Medik Depkes RI Tahun 2006)
17. TPK permintaan dan penerimaan sejumlah uang oleh penyelenggara negara terkait dengan renovasi gedung kantor, wisma duta besar, wisma DC dan rumah-rumah dinas KBRI di Singapura tahun 2003-2004 atas nama tersangka Sudjadnan Hadiparnodoningrat (Mantan Sekretaris Jenderal Departemen Luar Negeri RI)
18. TPK dalam pengadaan dan pemasangan Solar Home System (SHS) pada Direktorat Jenderal Listrik dan pemanfaatan Energi Departemen Energi dan Sumber Daya Mineral (ESDM) tahun anggaran 2007 dan 2008 atas nama tersangka Jacob Purwono Kosasih (Direktorat Jenderal LPE Departemen ESDM)
19. TPK memberi sesuatu/ hadiah berupa uang kepada pejabat BPK RI perwakilan Jabar terkait pelaksanaan pemeriksaan laporan keuangan pemerintah daerah kota Bekasi tahun Anggaran 2009 atas nama tersangka Herry Lukmantohari (Pegawai Pemerintah Kota Bekasi), Herry Suparjan (Kabid Aset dan Akuntansi Dinas PPKAD Kota Bekasi)
20. TPK menerima sesuatu/ hadiah berupa uang dari pejabat pemerintah kota Bekasi terkait pelaksanaan pemeriksaan laporan keuangan pemerintah daerah kota Bekasi tahun Anggaran 2009 atas nama tersangka Suharto (Kepala Perwakilan BPK Provinsi Jawa Barat) dan Enang Hermawan (PNS BPK RI)

21. TPK dalam penggunaan APBD Pemkot Tomohon TA 2006-2008 atas nama tersangka Jefferson Soleiman Montesqieu Rumajar (Walikota Tomohon)
22. TPK yaitu secara bersama-sama atau turut serta dengan Umar Sjarifuddin (mantan dirut bank Jabar) melakukan pemberian berupa uang kepada pemeriksa pajak Karipka Bandung satu pada tahun 2004 atau pengurangan jumlah pajak kurang bayar PT Bank Jabar tahun pajak 2001 dan 2002 atas nama tersangka Herry Achmad Buchori (Mantan Pimpinan Divisi Akuntansi Bank Jawa Barat)
23. TPK yaitu secara bersama-sama atau turut serta dengan Eddi Setiadi menerima pemberian/hadiah berupa uang pada tahun 2004 terkait dengan pemeriksaan pajak PT Bank Jabar atas pengurangan jumlah pajak kurang bayar PT Bank Jabar tahun pajak 2001 dan 2002 atas nama tersangka Roy Yuliandri, Muhammad Yazid, dan Dien Rajana Mulya (Mantan pemeriksa pajak Kantor Pelayanan Pajak (KPP) dan Kantor Pemeriksaan dan Penyidikan Pajak Bandung Satu)
24. TPK yaitu menerima pemberian/hadiah berupa uang pada tahun 2004 terkait dengan pemeriksaan pajak PT Bank Jabar atas pengurangan jumlah pajak kurang bayar PT Bank Jabar tahun pajak 2001 dan 2002 atas nama tersangka Dedy Suwardi (Mantan pemeriksa pajak Kantor Pelayanan Pajak (KPP) dan Kantor Pemeriksaan dan Penyidikan Pajak Bandung Satu)
25. TPK yaitu setiap orang yang secara melawan hukum melakukan perbuatan memperkaya diri sendiri atau orang lain atau suatu korporasi, kesempatan atau kedudukannya yang dapat merugikan keuangan negara atau perekonomian negara dalam pengadaan outsourcing pengelolaan sistem informasi (CIS) berbasis IT mencakup sistem informasi pengelolaan piutang pelanggan (SIP3) pada PT PLN (Persero) Wilayah Lampung pada Desember 2003 sd Maret 2004 atas nama tersangka Hariadi Sadono (General Manager PP PLN (Persero) wilayah Lampung Periode 2002 – 2003)
26. TPK sebagai orang yang turut serta atau bersama-sama dengan Hariadi Sadono (GM PT PLN Persero Wilayah Lampung Periode Maret 2004-2008) dalam pengadaan outsourcing pengelolaan sistem informasi CIS Berbasis IT mencakup sistem informasi pengelolaan piutang pelanggan (SIP3) pada PT PLN wilayah Lampung tahun 2003-2008 dan perbuatannya memberikan hadiah atau janji kepada pegawai PT PLN (Persero) atas nama tersangka Georgie Kumaat (Swasta)
27. TPK bersama-sama memberikan sesuatu/hadiah berupa uang kepada pejabat BPK RI perwakilan Jawa Barat terkait pelaksanaan pemeriksaan laporan keuangan Pemda Kota Bekasi tahun anggaran 2009 atas nama tersangka Tjandra Utama Effendi (Sekretaris Daerah Kota Bekasi)
28. TPK sebagai orang yang bersama-sama atau turut serta atau turut membantu terkait perbuatan Anggodo Widjojo dkk dalam melakukan perbuatan permufakatan jahat untuk melakukan, menyuruh melakukan, turut serta melakukan perbuatan dengan sengaja mencegah merintangi atau menggagalkan secara langsung atau tidak langsung penyidikan, penuntutan, dan pemeriksaan disidang pengadilan terhadap tersangka atau terdakwa ataupun para saksi dalam perkara korupsi yang terjadi pada tahun 2008 sampai dengan tahun 2009, dan atau perbuatan bersama-sama atau turut serta, membantu melakukan percobaan memberi atau menjanjikan sesuatu kepada pimpinan KPK dan atau pegawai KPK atas nama tersangka Ary Muladi (Swasta)
29. TPK dalam pengadaan Alat Kesehatan dan Perbekalan dalam rangka wabah Flu Burung (Avia Influenza) Dana APBN Direktorat Bina Pelayanan Medik Dasar Direktorat Jenderal Bina Pelayanan Medik Depkes RI TA 2006 atas nama tersangka Ratna Dewi Umar (Direktur Bina Pelayanan Medik Dasar Direktorat Jenderal Bina Pelayanan Medik Depkes RI tahun 2006)
30. TPK dalam Pengadaan dan Pemasangan Listrik Tenaga Surya (PLTS) Berupa Solar Home System (SHS) dan Pembangkit Listrik Tenaga Mikro hidro (PLMTH) pada Direktorat Jenderal Listrik dan Pemanfaatan Energi Departemen Energi dan Sumber Daya Mineral (LP ESDM) TA 2009 atas nama tersangka Jacob Purwono (Dirjen LPE Departemen ESDM) dan M Ridwan Sanjaya (PPK di Departemen ESDM)
31. TPK dalam penerimaan sejumlah Travellers Cheque (TC) BII oleh anggota DPR RI Komisi IX periode 1999 s/d 2004 dalam rangka pemilihan Deputi Gubernur Senior (DGS) Bank Indonesia (BI) pada

tahun 2004 yang dilakukan bersama sama dengan HAMKA YANDHU YR atas nama tersangka Ahmad Hafiz Zawawi, Marthin Bria Seran, Paskah Suzetta, Bobby SH Suhardiman, Anthony Zeidra Abidin (Anggota DPR)

32. TPK dalam penerimaan sejumlah Travellers Cheque (TC) BII oleh anggota DPR RI Komisi IX periode 1999 s/d 2004 dalam rangka pemilihan Deputy Gubernur Senior (DGS) Bank Indonesia (BI) yang dilakukan bersama sama dengan DUDHIE MAKMUN MUROD atas nama tersangka Agus Chondro Prayitno, Max Moein, Rusman Lumbantoruan, Poltak Sitorus, Williem M Tutuarima (Anggota DPR)
33. TPK dalam penerimaan sejumlah Travellers Cheque (TC) BII oleh anggota DPR RI Komisi IX periode 1999 s/d 2004 dalam rangka pemilihan Deputy Gubernur Senior (DGS) Bank Indonesia (BI) yang dilakukan bersama sama dengan HAMKA YANDHU atas nama tersangka Muhammad Nurlif, Asep Ruchimat Sudjana, Reza Kamarullah, Baharuddin Aritonang, Hengky Baramuli (Anggota DPR)
34. TPK dalam penerimaan sejumlah Travellers Cheque (TC) BII oleh anggota DPR RI Komisi IX periode 1999 s/d 2004 dalam rangka pemilihan Deputy Gubernur Senior (DGS) Bank Indonesia (BI) yang dilakukan bersama sama dengan ENDIN AJ SOEFIHARA atas nama tersangka H.M Danial Tandjung dan Sofyan Usman (Anggota DPR)
35. TPK dalam penerimaan sejumlah Travellers Cheque (TC) BII oleh anggota DPR RI Komisi IX periode 1999 s/d 2004 dalam rangka pemilihan Deputy Gubernur Senior (DGS) Bank Indonesia (BI) yang dilakukan bersama sama dengan DUDHIE MAKMUN MUROD atas nama tersangka Panda Nababan, Engelina Patiasina, M Iqbal, Budiningsih, dan Jeffri Tongas (Anggota DPR)
36. TPK dalam penerimaan sejumlah Travellers Cheque (TC) BII oleh anggota DPR RI Komisi IX periode 1999 s/d 2004 dalam rangka pemilihan Deputy Gubernur Senior (DGS) Bank Indonesia (BI) yang dilakukan bersama sama dengan DUDHIE MAKMUN MUROD atas nama tersangka Ni Luh Mariani, Sutanto Pranoto, Soewarno, dan Matheos Pormes (Anggota DPR)
37. TPK dalam Pengadaan Mobil Pemadam Kebakaran dengan menggunakan pompa merk Tohatsu type V80ASM dan Merk Morita di beberapa Pemprov/Pemkab/Pemkot dengan pembayaran bersumber dari APBD tahun 2002 sd 2005 atas nama tersangka Hari Sabarno (Mantan Menteri dalam Negeri)
38. Perkara TPK dalam penerimaan sejumlah uang dari Otorita Batam dalam rangka usulan anggaran Otorita Batam Tahun 2004 dan 2005 atas nama tersangka Sofyan Usman (Anggota DPR)
39. Perkara TPK dalam pengelolaan dan pertanggungjawaban keuangan APBD Pemerintah Kota Bekasi dan atau perbuatan melakukan percobaan perbantuan, atau permufakatan jahat untuk memberi atau menjanjikan sesuatu terkait dengan Adipura dan pengesahan APBD 2010 Pemerintah Kota Bekasi atas nama tersangka Mochtar Mohamad (Walikota Bekasi)
40. Perkara TPK dalam pengelolaan dana penanggulangan bencana alam Kabupaten Nias Tahun 2007 atas nama tersangka Binahati B. Baeha (Bupati Nias)

 **Share**

 **Tweet**

You are here: / Publikasi / Penanganan Perkara (/id/publikasi/penanganan-perkara)  
/ Penyidikan (/id/publikasi/penanganan-perkara/penyidikan) / Penyidikan 2010

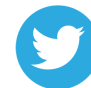

@KPK\_RI ([https://twitter.com/kpk\\_ri](https://twitter.com/kpk_ri)) : #KawanAksi juga dapat menyimak Data LHK Kepala Daerah Provinsi S

---

## Tentang KPK

Visi dan Misi (/id/tentang-kpk/sekilas-kpk)

Fungsi dan Tugas (/id/tentang-kpk/fungsi-dan-tugas)

Struktur Organisasi (/id/layanan-informasi-publik/laporan-harta-kekayaan-penyelenggaraan-negara/informasi-berkala/informasi-berkaitan-badan-publik/struktur-organisasi)

Pejabat Struktur KPK (/id/tentang-kpk/pejabat-struktural)

Rencana Strategis (/id/tentang-kpk/roadmap-dan-rencana-strategis)

Profil Pimpinan (/id/layanan-informasi-publik/laporan-harta-kekayaan-penyelenggaraan-negara/informasi-berkala/informasi-berkaitan-badan-publik/profil-pimpinan-kpk)

Undang - Undang Pendukung (/id/layanan-informasi-publik/laporan-harta-kekayaan-penyelenggaraan-negara/informasi-berkala/undang-undang-pemberantasan-tindak-pidana-korupsi)

---

## Indeks Berita

Siaran Pers (/id/berita/siaran-pers)

Berita KPK (/id/berita/berita-kpk)

Publik Bicara (/id/berita/publik-bicara)

---

## Layanan Publik

Pengaduan Masyarakat (/id/layanan-publik/pengaduan-masyarakat/mengenal-pengaduan-masyarakat)

LHKPN (/id/layanan-publik/laporan-harta-kekayaan-penyelenggaraan-negara/mengenal-lhkpn)

Gratifikasi (/id/layanan-publik/gratifikasi/mengenal-gratifikasi)

Informasi Publik (/id/layanan-publik/informasi-publik)

---

## Publikasi

Laporan Keuangan (/id/publikasi/laporan-keuangan)

Laporan Tahunan (/id/publikasi/laporan-tahunan)

## Kontak KPK

---

### GEDUNG KPK

Jln. Kuningan Persada Kav. 4

Jakarta Selatan 12950

Telp : (021) 2557 8300

Faks : (021) 2557 8333

**Call Center: 198**

Email : informasi@kpk.go.id

---

Hak Cipta © 2019 Komisi Pemberantasan Korupsi. Semua Hak Dilindungi.

## **BERSAMA KPK BERANTAS KORUPSI**

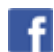

(<https://www.facebook.com/KomisiPemberantasanKorupsi>)

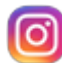

(<https://www.instagram.com/official.kpk>)

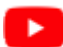

(<https://www.youtube.com/user/HUMASKPK>)
