# Supplementary material for: Democratization, leader education and growth: firm-level evidence from Indonesia
Source: Springer Nature journal article supplement (doi:10.1007/s10887-022-09221-5), 2023-02-15
Supplement: MOESM2 [file Penyidikan 2011.pdf › Data/Mayor-level corruption dataset (incl sources)/KPK Penyidikan 2006-/Penyidikan 2011.pdf]

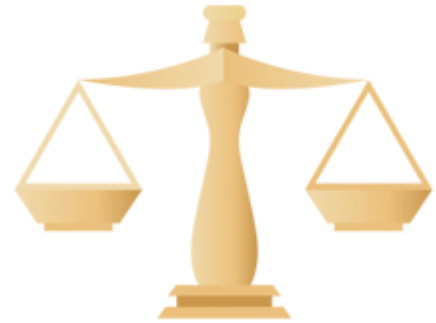

# PENINDAKAN

Menyajikan informasi perkembangan penanganan tindak pidana korupsi yang dilakukan oleh Komisi Pemberantasan Korupsi.

[Beranda \(/id/\)](#) / [Berkas](#) / [PENINDAKAN](#) / [Penyidikan \(/id/berkas/penindakan/penyidikan\)](#) / [Penyidikan 2011](#)

## PENYIDIKAN

### Penyidikan 2011

Ditulis oleh admin.acch. Diposting di [Penyidikan \(/id/berkas/penindakan/penyidikan\)](#). Dilihat: 5422

#### Desember

1. Perkara TPK penerimaan hadiah atau janji, padahal patut diketahui atau patut diduga hadiah atau janji tersebut diberikan untuk menggerakkan agar melakukan atau tidak melakukan sesuatu dalam jabatannya yang bertentangan dengan kewajibannya dalam pengalokasian anggaran atas nama tersangka WON (Anggota Badan Anggaran DPR RI).

---

#### November

1. Perkara TPK dalam pengelolaan Dana Penyelenggaraan Kegiatan Pertemuan-pertemuan / Sidang Internasional pada Departemen Luar Negeri Periode Tahun 2004 sd 2005 atas nama tersangka SP ( Mantan Sekjen Deplu RI).
2. Perkara TPK memberi sesuatu/hadiah berupa uang kepada jaksa penuntut umum di Kantor Kejaksaan Negeri Cibinong Jawa Barat terkait dengan perubahan pembuatan rencana tuntutan

- perkara penipuan atas nama tersangka EMB (Direktur Utama PT. Damarindo Abadi Lestari) bersama-sama dengan tersangka AB ( Karyawan PT. Damarindo Abadi Lestari).
3. Perkara TPK penerimaan sesuatu atau hadiah berupa uang dari EMB dalam kaitan perubahan rencana penuntutan kasus pemalsuan dan penggelapan di Pengadilan Negeri Cibinong Jawa barat atas nama tersangka S dkk ( Jaksa Penuntut Umum Kejaksaan Negeri Cibinong Jawa Barat).
  4. Perkara TPK sehubungan dengan pemberian sesuatu kepada Pegawai Negeri atau Penyelenggara Negara atas nama tersangka AZ (Sekda Kota Semarang).
  5. Perkara TPK menerima hadiah atau janji atas nama tersangka APS dkk ( Anggota DPRD Kota Semarang).
  6. Perkara TPK menerima hadiah ataujanji atas nama tersangka S dkk (Anggota DPRD Kota Semarang).
- 

## **Oktober**

1. Perkara TPK penerimaan sesuatu atau uang yang didua diberikan oleh Direktur PT. Sugih Interjaya dkk terkait dengan proyek pengadaan Tethra Ethyl Lead (TEL) di PT. Pertamina (Persero) tahun 2004 – 2005 atas nama tersangka SAM (Mantan Direktur Pengolahan/Pensiunan PT. Pertamina.
  2. Perkara TPK memberikan sesuatu atau uang kepada Direktur Pengolahan PT. Pertamina Persero dan pihak lainnya terkait dengan proyek Pengadaan Tethra Ethyl Lead (TEL) di PT. Pertamina (Persero) tahun 2004-2005 atas nama tersangka WSL dkk ( Direktur PT. Sugih Interjaya).
- 

## **September**

1. Perkara TPK dalam pelaksanaan pengadaan reagen dan consumable penanganan virus flu burung dari DIPA APBN-P pada Direktorat Jenderal Bina Pelayanan Medik Departemen Kesehatan RI TA 2007 atas nama tersangka RDU dkk (Direktur Bina Pelayanan Medik Depkes RI Tahun 2007).
2. Perkara TPK dalam pelaksanaan pengadaan peralatan kesehatan untuk melengkapi rumah sakit rujukan penanganan flu burung pada Direktorat Jenderal Bina Pelayanan Medik Departemen Kesehatan RI dari DIPA APBN-P pada Direktorat Jenderal Bina Pelayanan Medik Departemen Kesehatan RI TA 2007 atas nama tersangka RDU dkk (Direktur Bina Pelayanan Medik Depkes RI Tahun 2007).
3. Perkara TPK dalam pengadaan alat kesehatan I untuk kebutuhan Pusat Penanggulangan Krisis Departemen Kesehatan dari dana DIPA revisi APBN Pusat Penanggulangan Krisis Sekretariat

Jenderal Departemen Kesehatan TA 2007 atas nama tersangka RSP (Kepala Pusat Penanggulangan Krisis Departemen Kesehatan).

4. Perkara TPK dalam penjualan aset tanah PT Barata Indonesia (Persero) tahun 2004 atas nama tersangka MH (Direktur Pemberdayaan Keuangan dan Sumber Daya Manusia PT Barata Indonesia).
- 

## **Agustus**

1. Perkara TPK dalam pengadaan dan pemasangan Pembangkit Listrik Tenaga Surya (PLTS) di Dirjen Pembinaan Pengembangan Masyarakat dan Kawasan Transmigrasi (P2MKT) Kementerian Tenaga Kerja dan Transmigrasi Tahun Anggaran 2008 atas nama Tersangka NSW (Swasta).
  2. Perkara TPK dalam pengadaan Iklan Layanan Masyarakat pada Badan Pengelolaan Lingkungan Hidup Daerah (BPLHD) Prov DKI Jakarta Tahun Anggaran 2007 atas nama Tersangka HF (Swasta).
  3. Perkara TPK dalam pengadaan Iklan Layanan Masyarakat pada Dinas Kependudukan dan Catatan Sipil (DUKCAPIL) Prov DKI Jakarta Tahun Anggaran 2007 atas nama tersangka HF (Swasta).
  4. Perkara TPK memberikan hadiah atau janji kepada Menteri Tenaga Kerja dan Transmigrasi bersama-sama dengan INS dan DI atas nama tersangka DN (Swasta).
  5. Perkara TPK memberikan hadiah atau janji kepada Menteri Tenaga Kerja dan Transmigrasi bersama-sama dengan DI dan DN atau bersama-sama dengan DI menerima hadiah atau janji dari DN atas nama Tersangka INS (Sekretaris Direktorat Jenderal P2KTrans Tahun 2011).
  6. Perkara TPK memberikan hadiah atau janji kepada Menteri Tenaga Kerja dan Transmigrasi bersama-sama dengan INS dan DN atau bersama-sama dengan INS menerima hadiah atau janji dari DN atas nama Tersangka DI (PNS Kemenakertrans).
- 

## **Juli**

1. Perkara TPK yaitu memberikan sesuatu atau uang kepada Hakim pada Pengadilan Hubungan Industrial Pengadilan Negeri Bandung terkait putusan perkara dan untuk pengurusan kasus di Mahkamah Agung RI supaya putusan kasasi menolak gugatan Serikat Pekerja dalam penanganan kasus Hubungan Industrial terkait pemutusan hubungan kerja akibat mogok kerja tidak sah yang dilakukan oleh Pekerja PT Onamba Indonesia atas nama tersangka OJ (Manager Administrasi PT. Onamba).
2. Perkara TPK menerima pemberian sesuatu atau uang dengan maksud untuk mempengaruhi putusan perkara yang diserahkan kepada untuk diadili dan atau pegawai negeri atau

penyelenggaraan negara yang menerima hadiah atau janji atas nama tersangka ID (Hakim Pengadilan Hubungan Industrial Pengadilan Negeri Bandung).

3. Perkara TPK memberi atau menjanjikan sesuatu kepada pegawai negeri atau penyelenggara negara dengan maksud supaya pegawai negeri atau penyelenggara negara tersebut berbuat atau tidak berbuat sesuatu dalam jabatannya yang bertentangan dengan kewajibannya atas nama tersangka ME (Bupati Seluma Periode 2010 – 2015).

---

## **Juni**

1. Perkara TPK menerima sesuatu atau uang dalam penanganan perkara penjualan aset PT. Skycamping Indonesia (dalam pailit) atas nama tersangka S (Hakim Pengawas Pengadilan Niaga pada Pengadilan Negeri Jakarta Pusat).
2. Perkara TPK memberikan sesuatu atau uang kepada Hakim Pengawas Pengadilan Niaga pada Pengadilan Negeri Jakarta Pusat terkait penjualan aset PT. Skycamping Indonesia (dalam pailit) atas nama tersangka PW (Kurator).
3. Perkara TPK penerimaan hadiah atau pemberian berupa uang kepada pemeriksa Badan Pemeriksa Keuangan Sulawesi Utara pada tahun 2008 Laporan Keuangan Pemerintah Kota Tomohon TA. 2007 atas nama tersangka JSMR (Walikota Tomohon).
4. Perkara TPK penerimaan hadiah atau pemberian berupa uang kepada pemeriksa Badan Pemeriksa Keuangan Sulawesi Utara pada tahun 2008 atas Laporan Keuangan Pemerintah Kota Tomohon TA. 2007 dalam kaitan tindak pidana korupsi APBD Kota Tomohon TA 2006 sd 2008 dengan tersangka JSMR (Walikota Tomohon) atas nama tersangka B (Pimpinan Tim Pemeriksa BPK Sulut) dan MM (Anggota Tim Pemeriksa BPK Sulut).
5. Perkara TPK dalam pengelolaan anggaran Inspektorat Jenderal Departemen Pendidikan Nasional Tahun 2009 atas nama tersangka MS (Irjen Depdiknas RI).
6. Perkara TPK penerimaan hadiah atau janji padahal diketahui atau patut diduga bahwa hadiah tersebut diberikan sebagai akibat atau disebabkan karena telah melakukan atau tidak melakukan sesuatu dalam jabatannya yang bertentangan dengan kewajibannya sehubungan dengan pembangunan wisma atlit di Jaka Baring Sumatera Selatan tahun 2010 – 2011 atas nama tersangka MN (Anggota DPR RI periode tahun 2009 – 2014).

---

## **Mei**

1. -

---

## **April**

1. Perkara TPK memberikan sesuatu kepada pegawai negeri atau penyelenggara negara dengan maksud supaya pegawai negeri atau penyelenggara negara tersebut berbuat atau tidak berbuat sesuatu dalam jabatannya yang bertentangan dengan kewajibannya atas nama tersangka FL (Bupati Nias Selatan).
  2. Perkara TPK pegawai negeri atau penyelenggara negara yang menerima hadiah atau janji tersebut yang diberikan untuk menggerakkan agar melakukan atau tidak melakukan sesuatu dalam jabatannya yang bertentangan dengan kewajibannya yang berhubungan dengan pembangunan wisma atlet di Jaka Baring Sumatera Selatan atas nama tersangka WM (Sesmen Kemenpora).
  3. Perkara TPK memberikan sesuatu kepada pegawai negeri atau penyelenggara negara tersebut untuk berbuat atau tidak berbuat sesuatu dalam jabatannya yang bertentangan dengan kewajibannya atas nama tersangka MEI (Swasta).
  4. Perkara TPK memberikan sesuatu kepada pegawai negeri atau penyelenggara negara tersebut untuk berbuat atau tidak berbuat sesuatu dalam jabatannya yang bertentangan dengan kewajibannya atas nama tersangka MRM (Swasta).
- 

## **Maret**

1. Perkara TPK dalam Pengadaan Pembangkit Listrik Tenaga Surya dan Pekerjaan Supervisi Pembangkit Listrik Tenaga Surya (PLTS) di Ditjen Pembinaan Pengembangan Masyarakat dan Kawasan Transmigrasi (P2MKT) Kementrian Tenaga Kerja dan Transmigrasi TA 2008 atas nama tersangka TG selaku Pejabat Pembuat Komitmen (PPK) dkk.
  2. Perkara TPK sebagai orang yang bersama-sama atau turut serta terkait perbuatan Bachtiar Chamsyah dalam melakukan tindak pidana korupsi pengadaan sapi impor dan mesin jahit di Departemen Sosial RI tahun 2004 atas nama tersangka AD (mantan Dirjen Bantuan Jaminan Sosial Departemen Sosial/Anggota DPR).
  3. Perkara TPK sebagai orang yang bersama-sama atau turut serta terkait perbuatan Bachtiar Chamsyah dalam melakukan tindak pidana korupsi pengadaan sapi impor dan mesin jahit di Departemen Sosial RI tahun 2004 atas nama tersangka Y (mantan Kasubdit Kemitraan Usaha Direktorat Bantuan Sosial Fakir Miskin Ditjen Banjamsos Departemen Sosial/Staf Khusus Sekjen Depsos RI).
- 

## **Februari**

1. Perkara TPK dalam penjualan aset tanah PT Barata Indonesia (Persero) tahun 2004 atas nama tersangka MH (Direktur Pemberdayaan Keuangan dan Sumber Daya Manusia PT Barata Indonesia).

2. Perkara TPK yaitu pegawai negeri atau penyelenggara negara (penegak hukum) yang dengan maksud menguntungkan diri sendiri atau orang lain secara melawan hukum atau dengan menyalahgunakan kekuasaan memaksa seseorang memberikan sesuatu atas nama tersangka DSW (Jaksa).
  3. Perkara TPK memberikan travelers cheque (TC) kepada para anggota DPR-RI periode 1999-2004 dalam pemilihan Deputy Gubernur Senior Bank Indonesia tahun 2004 atas nama tersangka NN (Swasta).
- 

## Januari

1. Perkara TPK turut serta terkait perbuatan TAJ (Bupati Pelalawan) Dkk, melakukan TPK terkait dengan penilaian dan pengesahan RKT UPHHKHT pada areal yang diberikan IUPHHKT-HT Tahun 2001 sd 2006 di wilayah Kabupaten Pelalawan kepada sejumlah perusahaan tidak sesuai dengan ketentuan yang berlaku dan mengakibatkan kerugian keuangan negara atau perekonomian negara atas nama tersangka ST (Mantan Kadishut Prop. Riau).
2. Perkara TPK turut serta terkait perbuatan TAJ (Bupati Pelalawan) Dkk, melakukan TPK terkait dengan penilaian dan pengesahan RKT UPHHKHT pada areal yang diberikan IUPHHKT-HT Tahun 2001 sd 2006 di wilayah Kabupaten Pelalawan kepada sejumlah perusahaan tidak sesuai dengan ketentuan yang berlaku dan mengakibatkan kerugian keuangan negara atau perekonomian negara atas nama tersangka BH (Mantan Kadishut Prop. Riau).
3. Perkara TPK terkait penerbitan izin usaha pemanfaatan hasil hutan kayu pada hutan tanaman tahun 2001 - 2003 di wilayah kabupaten Siak kepada sejumlah perusahaan yang tidak sesuai dengan ketentuan yang berlaku dan mengakibatkan kerugian keuangan negara atau perekonomian negara dan atau menerima hadiah berkaitan dengan kekayaan atau kewenangan yang berhubungan dengan jabatannya atas nama tersangka AAS (Bupati Siak) dkk.
4. Perkara TPK pemberian sejumlah uang kepada anggota Komisi IV DPR RI dan pejabat Departemen Kehutanan RI terkait dengan Proses Pengajuan Anggaran Sistem Komunikasi Radio Terpadu (SKRT) Departemen Kehutanan tahun 2007 – 2008 atas nama tersangka AW dkk (Swasta).
5. Perkara TPK dalam pengadaan peralatan kesehatan untuk rumah sakit rujukan penanganan Flu Burung dari DIPAPBN-P Kementerian Koordinator Bidang Kesejahteraan Rakyat TA 2006 atas nama tersangka SY (Sekretaris Menteri Koordinator Bidang Kesejahteraan Rakyat).
6. Perkara TPK dalam pengadaan Jasa Angkutan KRL Hibah Ex. Jepang Tahun 2006 – 2007 yang atas nama tersangka SES (Direktur Jenderal Perkeretaapian Departemen Perhubungan RI).
7. Perkara TPK sebagai orang yang bersama-sama atau turut serta dalam perkara TPK pada pengadaan mesin jahit pada bagian proyek pengentasan fakir miskin Depsos Tahun 2004 dan 2006 yang dilakukan oleh tersangka BC (Menteri Sosial RI periode 2004-2009) atas nama tersangka MA(Swasta).

8. Perkara TPK sebagai orang yang bersama-sama atau turut serta dalam perkara TPK pada pengadaan sarung yang dananya berasal dari pengelolaan rekening pemerintah pada Depsos Tahun 2006-2008 yang dilakukan oleh tersangka BC (Menteri Sosial RI periode 2004-2009) atas nama tersangka CR (Swasta).
9. Perkara TPK dalam pengadaan Roll Out Customer Information System – Rencana Induk Sistem Informasi (CIS – RISI) pada PT PLN (Persero) Distribusi Jakarta Raya dan Tangerang yang diduga dilakukan oleh tersangka EWS dkk (Direktur Utama PT PLN (Persero)).
10. Perkara TPK dalam penyalahgunaan dan pengelolaan kas daerah kabupaten Langkat serta penyalahgunaan penggunaan APBD kabupaten Langkat pada tahun 2000-2007 atas nama tersangka SA (Bupati Langkat), dkk.
11. Perkara TPK dalam pelaksanaan pengadaan peralatan medik dari sisa dana pelayanan kesehatan bagi penduduk miskin dalam rangka wabah flu burung (Avian Influenza) pada Dirjen Bina Pelayanan Medik Departemen Kesehatan dan dalam pelaksanaan pengadaan peralatan kesehatan penanganan wabah flu burung (Avian Influenza) dana APBN-P Sekretariat Dirjen Bina Pelayanan Medik Depkes TA 2006 atas nama tersangka MAH (Sesditjen Bina Pelayanan Medik Depkes RI Tahun 2006) dkk.
12. Perkara TPK dalam Pengadaan dan Pemasangan Listrik Tenaga Surya (PLTS) berupa Solar Home System (SHS) dan Pembangkit Listrik Tenaga Mikro Hidro (PLMTH) pada Direktorat Jenderal Listrik dan Pemanfaatan Energi Departemen Energi dan Sumber Daya Mineral (LP ESDM) tahun anggaran 2009 atas nama tersangka JP (Dirjen Listrik dan Pemanfaatan Energi Kementerian ESDM) dan MRS.
13. Perkara TPK dalam pengadaan outsourcing pengelolaan sistem informasi (CIS) berbasis IT mencakup Sistem Informasi Pengelolaan Piutang Pelanggan (SIP3) pada PT PLN (Persero) Wilayah Lampung pada Desember 2003 sd Maret 2004 atas nama tersangka HS (General Manager PT PLN (Persero) wilayah Lampung Periode 2002 – 2003).
14. Perkara TPK sebagai orang yang turut serta atau bersama-sama dengan Hariadi Sadono (GM PT PLN Persero Wilayah Lampung Periode Maret 2004-2008) dalam pengadaan outsourcing pengelolaan sistem informasi CIS Berbasis IT mencakup Sistem Informasi Pengelolaan Piutang Pelanggan (SIP3) pada PT PLN wilayah Lampung tahun 2003-2008 dan perbuatannya memberikan hadiah atau janji kepada pegawai PT PLN (Persero) atas nama tersangka GK (Direktur Utama PT Altelindo Karyamandiri).
15. Perkara TPK sebagai orang yang bersama-sama atau turut serta atau turut membantu terkait perbuatan Anggodo Widjojo dkk dalam melakukan perbuatan permufakatan jahat untuk melakukan, menyuruh melakukan, turut serta melakukan perbuatan dengan sengaja mencegah merintangi atau menggagalkan secara langsung atau tidak langsung penyidikan, penuntutan, dan pemeriksaan disidang pengadilan terhadap tersangka atau terdakwa ataupun para saksi dalam perkara korupsi yang terjadi pada tahun 2008 sampai dengan tahun 2009, dan atau perbuatan bersama-sama atau turut serta, membantu melakukan percobaan memberi atau

menjanjikan sesuatu kepada pimpinan KPK dan atau pegawai KPK atas nama tersangka AM (Swasta).

16. Perkara TPK dalam pelaksanaan pengadaan alat kesejahteraan dan perbekalan dalam rangka wabah flu burung (Avian Influenza) Dana APBN Direktorat Bina Pelayanan Medik Dasar Direktorat Jenderal Bina Pelayanan Medik Depkes RI Tahun Anggaran 2006 atas nama tersangka RDU dkk (Direktur Bina Pelayanan Medik Dasar Direktorat Jenderal Bina Pelayanan Medik Depkes RI).
17. Perkara TPK dalam pengadaan dan pemasangan Pembangkit Listrik Tenaga Surya (PLTS) berupa Solar Home System (SHS) dan Pembangkit Listrik Tenaga Mikro Hidro (PLTMH) pada Direktorat Jenderal Listrik dan Pemanfaatan Energi Departemen Energi dan Sumber Daya Mineral (LPE ESDM) tahun anggaran 2009 atas nama tersangka JP (Dirjen LPE Departemen ESDM) dan K (Pejabat Pembuat Komitmen) dkk.
18. Perkara TPK penerimaan sejumlah TC BII oleh anggota DPR RI Komisi IX periode 1999 sd 2004 dalam rangka pemilihan Deputy Gubernur Senior (DGS) Bank Indonesia pada tahun 2004 yang dilakukan bersama-sama Hamka Yandhu atas nama tersangka AHZ, MBR, PZ, BS, AZA, dkk (Anggota DPR RI).
19. Perkara TPK penerimaan sejumlah TC BII oleh anggota DPR RI Komisi IX periode 1999 sd 2004 dalam rangka pemilihan Deputy Gubernur Senior (DGS) Bank Indonesia pada tahun 2004 yang dilakukan bersama-sama Dudhie Makmun Murod atas nama tersangka ACP, MM, RL, PS, dan WMT (Anggota DPR RI).
20. Perkara TPK penerimaan sejumlah TC BII oleh anggota DPR RI Komisi IX periode 1999 sd 2004 dalam rangka pemilihan Deputy Gubernur Senior (DGS) Bank Indonesia pada tahun 2004 yang dilakukan bersama-sama Hamka Yandhu, atas nama tersangka MN, ARS, RK, BA, dan HR (Anggota DPR RI).
21. Perkara TPK penerimaan sejumlah TC BII oleh anggota DPR RI Komisi IX periode 1999 sd 2004 dalam rangka pemilihan Deputy Gubernur Senior (DGS) Bank Indonesia pada tahun 2004 yang dilakukan bersama-sama Endin J Soefihara atas nama tersangka DT dan SU (Anggota DPR RI).
22. Perkara TPK penerimaan sejumlah TC BII oleh anggota DPR RI Komisi IX periode 1999 sd 2004 dalam rangka pemilihan Deputy Gubernur Senior (DGS) Bank Indonesia pada tahun 2004 yang dilakukan bersama-sama Dudhie Makmun Murod atas nama tersangka PN, EP, MI, B, JT (Anggota DPR RI).
23. Perkara TPK penerimaan sejumlah TC BII oleh anggota DPR RI Komisi IX periode 1999 sd 2004 dalam rangka pemilihan Deputy Gubernur Senior (DGS) Bank Indonesia pada tahun 2004 yang dilakukan bersama-sama Dudhie Makmun Murod atas nama tersangka NLM, SPS, dan MP (Anggota DPR RI).
24. Perkara TPK dalam pengadaan mobil pemadam kebakaran dengan menggunakan pompa merk Tohatsu type V80ASM dan Merk Morita di beberapa Pemprov/Pemkab/Pemkot dengan



pembayaran bersumber dari APBD tahun 2002 sd 2005 atas nama tersangka HS (Mantan Menteri Dalam Negeri).

25. Perkara TPK dalam penerimaan sejumlah uang dari Otorita Batam dalam rangka usulan anggaran Otorita Batam Tahun 2004 dan 2005 atas nama tersangka SU (anggota DPR RI).
26. Perkara TPK dalam pengelolaan dan pertanggungjawaban keuangan APBD Pemerintah Kota Bekasi dan atau perbuatan melakukan percobaan perbantuan, atau permufakatan jahat untuk memberi atau menjanjikan sesuatu terkait dengan Adipura dan pengesahan APBD 2010 Pemerintah Kota Bekasi atas nama tersangka MM dkk (Walikota Bekasi).
27. Perkara TPK dalam pengelolaan dana penanggulangan bencana alam Nias Tahun 2007 atas nama tersangka BBB (Bupati Nias).
28. Perkara TPK dalam Pengelolaan Dana Bantuan Sosial Sekretariat Daerah dan Dana Rehabilitasi /Pemeliharaan Dinas Pekerjaan Umum pada APBD Kota Pematang Siantar TA 2007 atas nama tersangka RES (Mantan Walikota Pematang Siantar periode 2005-2010).
29. Perkara TPK sebagai orang yang bersama-sama atau turut serta terkait dengan perbuatan JES (Mantan Kepala Biro Hukum Setda Prop DKI Jakarta) dkk melakukan TPK dalam pengelolaan APBD pada Biro Hukum Sekretariat Daerah Prop. DKI Jakarta TA 2006 - 2007 atas nama tersangka HF (Swasta).

---

**Share :**

Bagikan 0

Tweet

## PENINDAKAN

Penyidikan (/id/berkas/penindakan/penyidikan)

Penuntutan (/id/berkas/penindakan/penuntutan)

Inkracht (/id/berkas/penindakan/inkracht)

Jejak Kasus (/id/jejak-kasus)













## LINK

[TENTANG ACCH \(/ID/TENTANG-ACCH\).](#)

[DISCLAIMER \(/ID/DISCLAIMER\).](#)

[KETENTUAN \(/ID/KETENTUAN\).](#)

[SITEMAP \(/ID/SITEMAP\).](#)

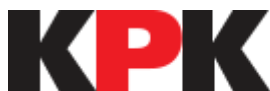

**Komisi Pemberantasan Korupsi**

[\(HTTPS://WWW.KPK.GO.ID/\)](https://www.kpk.go.id/)

## REDAKSI ACCH

KOMISI PEMBERANTASAN KORUPSI  
JL. KUNINGAN PERSADA KAV. 4 JAKARTA 12950  
TELP: (021) 2557 8300 EXT. 8642  
EMAIL: [ACCH@KPK.GO.ID](mailto:ACCH@KPK.GO.ID)  
([MAILTO:ACCH@KPK.GO.ID](mailto:ACCH@KPK.GO.ID)).
