# Supplementary material for: Democratization, leader education and growth: firm-level evidence from Indonesia
Source: Springer Nature journal article supplement (doi:10.1007/s10887-022-09221-5), 2023-02-15
Supplement: MOESM2 [file Penyidikan 2012.pdf › Data/Mayor-level corruption dataset (incl sources)/KPK Penyidikan 2006-/Penyidikan 2012.pdf]

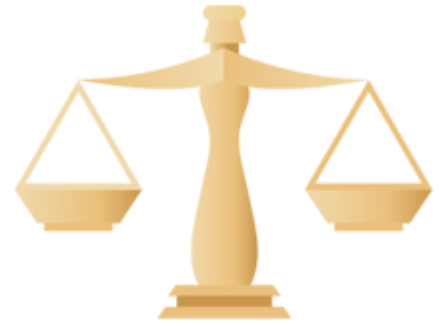

# PENINDAKAN

Menyajikan informasi perkembangan penanganan tindak pidana korupsi yang dilakukan oleh Komisi Pemberantasan Korupsi.

[Beranda \(/id/\)](#) / [Berkas](#) / [PENINDAKAN](#) / [Penyidikan \(/id/berkas/penindakan/penyidikan\)](#) / [Penyidikan 2012](#)

## PENYIDIKAN

### Penyidikan 2012

Ditulis oleh admin.acch. Diposting di [Penyidikan \(/id/berkas/penindakan/penyidikan\)](#). Dilihat: 5098

#### Desember

1. Perkara TPK pembangunan/pengadaan/peningkatan sarana dan prasarana olahraga di Hambalang TA 2010 – 2012 atas nama tersangka AAM (Menteri Pemuda dan Olahraga/Pengguna Anggaran pada Kementerian Pemuda dan Olahraga).
2. Perkara TPK dalam pemberian FPJP/Fasilitas Pendanaan Jangka Pendek dan Penetapan Bank Century sebagai bank gagal berdampak sistemik atas nama tersangka BM (Deputi Gubernur Bank Indonesia Bidang IV).
3. Perkara TPK penggunaan dana kas daerah Pemerintah kota Tomohon TA 2009 dan 2010 atas nama tersangka JSMR (Walikota Tomohon Periode Tahun 2005-2010).
4. Perkara TPK menerima pemberian hadiah/janji padahal diketahui atau patut diketahui bahwa hadiah/ janji tersebut diberikan untuk menggerakkan agar mau melakukan atau tidak melakukan sesuatu dalam jabatannya yang bertentangan dengan kewajibannya dan atau pegawai negeri/ penyelenggaran negara yang pada waktu melaksanakan tugas, meminta, menerima, atau memotong pembayaran kepada pegawai negeri/ penyelenggaran negara yang lain atau kas

umum tersebut mempunyai hutang atas nama tersangka IW (Plt. Panitera Muda pada Pengadilan Hubungan Industrial Pengadilan Negeri Bandung).

---

## **November**

1. Perkara TPK memberi sesuatu kepada pegawai negeri atau penyelenggara negara dengan maksud supaya pegawai negeri atau penyelenggara negara tersebut berbuat atau tidak berbuat sesuatu dalam jabatannya yang bertentangan dengan kewajibannya dalam pengalokasian anggaran bersama-sama dengan FEF atas nama tersangka HAS (Swasta).
- 

## **Oktober**

1. -
- 

## **September**

1. -
- 

## **Agustus**

1. Perkara TPK dalam pengadaan Driving Simulator Roda Dua (R2) dan Roda Empat (R4) pada Korps Lalu Lintas Mabes Polri TA 2011 atas nama tersangka SB (Swasta).
  2. Perkara TPK memberi atau menjanjikan sesuatu kepada Pegawai Negeri atau Penyelenggara Negara yaitu AB terkait dengan proses pengurusan HGU Perkebunan an. PT Cipta Cakra Murdaya dan atau PT Hardaya Inti Plantations yang terletak di Kec. Bukal Kab. Buol atas nama tersangka SHM (Swasta).
  3. Perkara TPK memberi atau menjanjikan sesuatu kepada Pegawai Negeri atau Penyelenggara Negara terkait dengan penyimpangan anggaran pemeliharaan mobil Dinas Sekretariat DPRD Kab. Grobogan TA 2006 – 2008 atas nama tersangka SD (Swasta).
  4. Perkara TPK menerima pemberian atau janji terkait dengan penyimpangan anggaran pemeliharaan mobil dinas sekretariat DPRD Kab. Grobogan TA 2006 – 2008 atas nama tersangka HK (Hakim Ad Hoc Tipikor pada Pengadilan Negeri Pontianak).
  5. Perkara TPK menerima pemberian atau janji terkait dengan penyimpangan anggaran pemeliharaan mobil dinas sekretariat DPRD Kab. Grobogan TA 2006 – 2008 atas nama tersangka KJM (Hakim Ad Hoc Tipikor pada Pengadilan Negeri Semarang).
- 

## **Juli**

1. Perkara TPK berupa menerima hadiah atau janji terkait dengan Perubahan Peraturan Daerah prop Riau Nomor 6 Tahun 2012 tentang Pengikatan Dana Anggaran Kegiatan Tahun Jamak untuk Pembangunan Venues pada Kegiatan PON XVIII Prop Riau atas nama tersangka AA (Anggota DPRD Prop Riau).
2. Perkara TPK berupa menerima hadiah atau janji terkait dengan Perubahan Peraturan Daerah Prop. Riau Nomor 6 Tahun 2012 tentang Pengikatan Dana Anggaran Kegiatan Tahun Jamak Untuk Pembangunan Venues pada Kegiatan PON XVIII Prop Riau atas nama tersangka ABS (Anggota DPRD Prop Riau).
3. Perkara TPK berupa menerima hadiah atau janji terkait dengan Perubahan Peraturan Daerah Prop. Riau Nomor 6 Tahun 2012 tentang Pengikatan Dana Anggaran Kegiatan Tahun Jamak Untuk Pembangunan Venues pada Kegiatan PON XVIII Prop Riau atas nama tersangka TM (Anggota DPRD Prop Riau).
4. Perkara TPK berupa menerima hadiah atau janji terkait dengan Perubahan Peraturan Daerah Prop. Riau Nomor 6 Tahun 2012 tentang Pengikatan Dana Anggaran Kegiatan Tahun Jamak Untuk Pembangunan Venues pada Kegiatan PON XVIII Prop Riau atas nama tersangka ZH (Anggota DPRD Prop Riau).
5. Perkara TPK berupa menerima hadiah atau janji terkait dengan Perubahan Peraturan Daerah Prop. Riau Nomor 6 Tahun 2012 tentang Pengikatan Dana Anggaran Kegiatan Tahun Jamak Untuk Pembangunan Venues pada Kegiatan PON XVIII Prop Riau atas nama tersangka SH (Anggota DPRD Prop Riau).
6. Perkara TPK berupa menerima hadiah atau janji terkait dengan Perubahan Peraturan Daerah Prop. Riau Nomor 6 Tahun 2012 tentang Pengikatan Dana Anggaran Kegiatan Tahun Jamak Untuk Pembangunan Venues pada Kegiatan PON XVIII Prop Riau atas nama tersangka MRZ (Anggota DPRD Prop Riau).
7. Perkara TPK berupa menerima hadiah atau janji terkait dengan Perubahan Peraturan Daerah Prop. Riau Nomor 6 Tahun 2012 tentang Pengikatan Dana Anggaran Kegiatan Tahun Jamak Untuk Pembangunan Venues pada Kegiatan PON XVIII Prop Riau atas nama tersangka TA (Anggota DPRD Prop Riau).
8. Perkara TPK terkait dengan Pembangunan/Pengadaan/Peningkatan Sarana Prasarana olahraga di Hambalang TA 2010-2012 atas nama tersangka DK (PPK pada Kementerian Pemuda dan Olahraga).
9. Perkara TPK menerima hadiah atau janji terkait Proyek Pembangunan PLTU Tarahan Lampung 2004 atas nama tersangka IEM ( Anggota DPR).
10. Perkara TPK dalam Pengadaan Driving Simulator Roda Dua (R2) dan Roda Empat (R4) pada Korps Lalu Lintas Mabes Polri TA 2011 atas nama tersangka DS ( Polri ).
11. Perkara TPK dalam Pengadaan Driving Simulator Roda Dua (R2) dan Roda Empat (R4) pada Korps Lalu Lintas Mabes Polri TA 2011 atas nama tersangka BS (Swasta).

12. Perkara TPK dalam Pengadaan Driving Simulator Roda Dua (R2) dan Roda Empat (R4) pada Korps Lalu Lintas Mabes Polri TA 2011 atas nama tersangka DP (Polri).
- 

## **Juni**

1. Perkara TPK menerima hadiah atau janji terkait dengan pengurusan pajak lebih bayar/restitusi pajak atau permufakatan jahat melakukan tindak pidana korupsi menerima atau memberi hadiah atau janji atas nama tersangka TH (Kasie Pengawasan dan Konsultasi Ditjen Pajak KPP Sidoarjo/Eselon IV).
2. Perkara TPK memberi hadiah atau janji kepada TH selaku pegawai negeri atau penyelenggara negara terkait dengan pengurusan pajak lebih bayar/restitusi pajak atau permufakatan jahat melakukan tindak pidana korupsi menerima atau memberi hadiah atau janji atas nama tersangka JGB (Swasta).
3. Perkara TPK melakukan perbuatan melakukan, menyuruh melakukan, turut serta melakukan perbuatan dengan sengaja mencegah, merintangi atau menggagalkan secara langsung atau tidak langsung penyidikan, penuntutan, dan pemeriksaan di sidang pengadilan terhadap tersangka atau terdakwa ataupun para saksi dalam perkara korupsi pengadaan dan pemasangan Pembangkit Listrik Tenaga Surya (PLTS) di Ditjen Pembinaan Pengembangan Masyarakat dan Kawasan Transmigrasi (P2MKT) Kementerian Tenaga Kerja dan Transmigrasi TA 2008 yang dilakukan oleh tersangka MHK (Swasta).
4. Perkara TPK melakukan perbuatan melakukan, menyuruh melakukan, turut serta melakukan perbuatan dengan sengaja mencegah, merintangi atau menggagalkan secara langsung atau tidak langsung penyidikan, penuntutan, dan pemeriksaan di sidang pengadilan terhadap tersangka atau terdakwa ataupun para saksi dalam perkara korupsi pengadaan dan pemasangan Pembangkit Listrik Tenaga Surya (PLTS) di Ditjen Pembinaan Pengembangan Masyarakat dan Kawasan Transmigrasi (P2MKT) Kementerian Tenaga Kerja dan Transmigrasi TA 2008 yang dilakukan oleh tersangka AMY (Swasta).
5. Perkara TPK menerima hadiah atau janji terkait dengan usulan penambahan anggaran untuk kegiatan Pembangunan Sarana dan Prasarana dalam rangka pelaksanaan PON XVIII di Prop Riau atas nama tersangka LA (Mantan Kepala Dinas Pemuda dan Olahraga Prop. Riau)
6. Perkara TPK menerima hadiah atau janji terkait dengan pengurusan anggaran dan atau pengadaan barang/jasa di Kementerian Agama RI TA 2010 sd 2012 atas nama tersangka ZD (Anggota DPR RI Komisi VIII/Anggota Badan Anggaran DPR RI) dan DP (Swasta).
7. Perkara TPK memberi atau menjanjikan sesuatu kepada pegawai negeri atau penyelenggara negara terkait dengan proses pengurusan Hak Guna Usaha (HGU) Perkebunan yang terletak di Kecamatan Bukal Kab. Buol Sulawesi Tengah atas nama tersangka YA (Swasta).
8. Perkara TPK memberi atau menjanjikan sesuatu kepada pegawai negeri atau penyelenggara negara terkait dengan proses pengurusan Hak Guna Usaha (HGU) Perkebunan yang terletak di

Kecamatan Bukal Kab. Buol Sulawesi Tengah atas nama tersangka GS (Swasta).

9. Perkara TPK berupa menerima sesuatu atau janji terkait dengan proses pengurusan Hak Guna Usaha (HGU) Perkebunan yang terletak di Kecamatan Bukal Kab. Buol Sulawesi Tengah atas nama tersangka AB (Bupati Buol).
- 

## Mei

1. Perkara TPK menerima hadiah atau janji terkait dengan persetujuan DPRD Prop Riau dalam usulan Perubahan Peraturan Daerah Prop Riau Nomor 6 Tahun 2010 tentang Pengikatan Dana Anggaran Kegiatan Tahun Jamak untuk Pembangunan Venues pada Kegiatan PON XVIII Prop Riau atas nama tersangka TAY (Anggota DPRD Riau).
  2. Perkara TPK memberi hadiah atau janji kepada M. Dunir dan M Faisal Aswan (Anggota DPRD Riau) dkk terkait dengan Persetujuan DPRD Prop Riau dalam usulan Perubahan Peraturan Daerah Prop Riau Nomor 6 Tahun 2010 tentang Pengikatan Dana Anggaran Kegiatan Tahun Jamak untuk Pembangunan Venues pada Kegiatan PON XVIII Prop Riau atas nama tersangka LA (Mantan Kepala Dinas Pemuda dan Olahraga Prop Riau) dkk.
  3. .
- 

## April

1. Perkara TPK memberi hadiah atau janji kepada Pegawai Negeri atau Penyelenggara Negara terkait dengan Perubahan Peraturan Daerah Nomor 6 Tahun 2010 tentang Pengikatan Dana Anggaran kegiatan Tahun Jamak untuk pembangunan venues pada kegiatan PON XVIII Prop Riau atas nama tersangka EDP (Kepala Seksi Pengembangan Sarana dan Prasarana Dinas Pemuda dan Olahraga Prop Riau).
2. Perkara TPK memberi hadiah atau janji kepada Pegawai Negeri atau Penyelenggara Negara terkait dengan Perubahan Peraturan Daerah Nomor 6 Tahun 2010 tentang Pengikatan Dana Anggaran kegiatan Tahun Jamak untuk pembangunan venues pada kegiatan PON XVIII Prop Riau atas nama tersangka RS (Karyawan PT Pembangunan Perumahan (Persero))
3. Perkara TPK menerima hadiah atau janji terkait dengan Perubahan Peraturan Daerah Nomor 6 Tahun 2010 tentang Pengikatan Dana Anggaran kegiatan Tahun Jamak untuk pembangunan venues pada kegiatan PON XVIII Prop Riau atas nama tersangka MFA (Anggota DPRD Prop Riau) dan M Dunir (Anggota DPRD Prop Riau).
4. Perkara TPK memberikan sesuatu atau uang yang dilakukan oleh ST dan Odih Juanda kepada Hakim pada Pengadilan Hubungan Industrial Pengadilan Negeri Bandung terkait putusan perkara dan untuk pengurusan kasus di Mahkamah Agung RI supaya putusan kasasi menolak gugatan Serikat Pekerja dalam penanganan kasus hubungan industrial terkait dengan

pemutusan hubungan kerja akibat mogok kerja tidak sah yang dilakukan oleh pekerja PT Onamba Indonesia atas nama tersangka ST (Swasta).

5. Perkara TPK sebagai orang yang bersama-sama atau turut serta atau menganjurkan terkait dengan perbuatan Nunun Nurbaetie untuk melakukan TPK memberikan Travellers Cheque (TC) kepada Anggota DPR RI Periode 1999 - 2004 dalam Pemilihan Deputy Gubernur Senior Bank Indonesia Tahun 2004 atas nama tersangka MSG (Mantan Deputy Gubernur Senior Bank Indonesia).
  6. Perkara TPPU terkait perbuatan menempatkan, mentransfer, mengubah bentuk, dan atau menyembunyikan/menyamarkan asal-usul, sumber, lokasi, kepemilikan dan atau perbuatan menerima atau menguasai penempatan, pentransferan, pembayaran atau menggunakan harta kekayaan yang diketahui atau patut diduga merupakan hasil tindak pidana atas nama tersangka WON (Anggota DPR RI).
  7. Perkara TPK dalam dugaan penerimaan hadiah atau janji padahal diketahui atau patut diduga bahwa hadiah atau janji tersebut diberikan sebagai akibat atau disebabkan karena telah melakukan atau tidak melakukan sesuatu dalam jabatannya yang bertentangan dengan kewajibannya terkait dengan pengelolaan anggaran pada Kementerian Pemuda dan Olahraga dan Kementerian Pendidikan Nasional antara tahun 2010–2011 atau penerimaan janji yang berhubungan dengan jabatannya atas nama tersangka AS (Anggota DPR RI).
  8. Perkara TPK dalam pembangunan Dermaga Trestle Kubangsari pada Pemerintah Kota Cilegon TA 2010 atas nama tersangka AS (Walikota Cilegon Periode 2005-2010).
- 

## **Maret**

1. Perkara TPK bersama-sama atau turut serta perbuatan EWS dalam pengadaan CIS RISI pada PT PLN Disjaya dan Tangerang dalam pengadaan CMS pada PT PLN Distribusi Jawa Timur atas nama tersangka GAG (Swasta).
2. Perkara TPK terkait dengan pemberian sesuatu kepada Pegawai Negeri atau Penyelenggara Negara bersama-sama dengan AZ (Sekda Kota Semarang) atas nama tersangka SHS (Walikota Semarang).
3. Perkara TPK secara bersama-sama atau turut serta dengan HB dan WS dalam melakukan perbuatan melawan hukum memperkaya diri sendiri atau orang lain dan penyalahgunaan wewenang dalam penggunaan dana dari rekening giro pemerintah Kab. Kendal Tahun 2003 dan 2004 yang bersumber dari Dana Alokasi Umum dan Dana Eks Pinjaman BPD Jateng Cab Kendal atas nama tersangka M (Ketua DPR Jawa Tengah).
4. Perkara TPK turut serta dan/atau bersama-sama dengan terdakwa ME dkk memberi atau menjanjikan sesuatu kepada pegawai negeri atau penyelenggara negara dengan maksud supaya pegawai negeri atau penyelenggara negara tersebut berbuat atau tidak berbuat sesuatu

dalam jabatannya yang bertentangan dengan kewajibannya atas nama tersangka EP (Kepala Dinas Pekerjaan Umum Seluma).

---

## Februari

1. Perkara TPK memberikan travelers cheque (TC) kepada para anggota DPR-RI periode 1999-2004 dalam pemilihan Deputy Gubernur Senior Bank Indonesia tahun 2004 atas nama tersangka NUNUN NURBAETIE (Swasta).
- 

## Januari

1. Perkara TPK turut serta dan/atau bersama-sama dengan terdakwa MURMAN EFFENDI dkk memberi atau menjanjikan sesuatu kepada pegawai negeri/penyelenggara negara dengan maksud supaya pegawai negeri atau penyelenggara negara tersebut berbuat atau tidak berbuat sesuatu dalam jabatannya yang bertentangan dengan kewajibannya atas nama tersangka ALI AMRA (Swasta).
  2. Perkara TPK memberi sesuatu kepada pegawai negeri atau penyelenggara negara dengan maksud supaya pegawai negeri atau penyelenggara negara tersebut berbuat atau tidak berbuat sesuatu dalam jabatannya yang bertentangan dengan kewajibannya dalam pengalokasian anggaran atas nama tersangka FAHD AL FOUZ (Swasta).
  3. Perkara TPK memberikan travelers cheque (TC) kepada para anggota DPR-RI periode 1999-2004 dalam pemilihan Deputy Gubernur Senior Bank Indonesia tahun 2004 atas nama tersangka MIRANDA SWARAY GOELTOM (Mantan Deputy Gubernur Senior Bank Indonesia).
- 

**Share :**   [Bagikan 0](#)   [Tweet](#)

## PENINDAKAN

Penyidikan (/id/berkas/penindakan/penyidikan)

Penuntutan (/id/berkas/penindakan/penuntutan)

Inkracht (/id/berkas/penindakan/inkracht)

Jejak Kasus (/id/jejak-kasus)













## LINK

[TENTANG ACCH \(/ID/TENTANG-ACCH\).](#)

[DISCLAIMER \(/ID/DISCLAIMER\).](#)

[KETENTUAN \(/ID/KETENTUAN\).](#)

[SITEMAP \(/ID/SITEMAP\).](#)

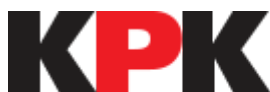

**Komisi Pemberantasan Korupsi**

[\(HTTPS://WWW.KPK.GO.ID/\)](https://www.kpk.go.id/)

## REDAKSI ACCH

KOMISI PEMBERANTASAN KORUPSI  
JL. KUNINGAN PERSADA KAV. 4 JAKARTA 12950  
TELP: (021) 2557 8300 EXT. 8642  
EMAIL: [ACCH@KPK.GO.ID](mailto:ACCH@KPK.GO.ID)  
([MAILTO:ACCH@KPK.GO.ID](mailto:ACCH@KPK.GO.ID)).
