# Supplementary material for: Democratization, leader education and growth: firm-level evidence from Indonesia
Source: Springer Nature journal article supplement (doi:10.1007/s10887-022-09221-5), 2023-02-15
Supplement: MOESM2 [file Penyidikan 2013.pdf › Data/Mayor-level corruption dataset (incl sources)/KPK Penyidikan 2006-/Penyidikan 2013.pdf]

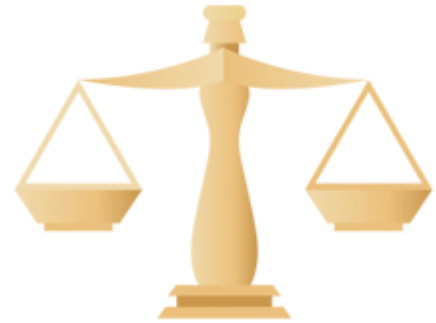

# PENINDAKAN

Menyajikan informasi perkembangan penanganan tindak pidana korupsi yang dilakukan oleh Komisi Pemberantasan Korupsi.

[Beranda \(/id/\)](#) / [Berkas](#) / [PENINDAKAN](#) / [Penyidikan \(/id/berkas/penindakan/penyidikan\)](#) / [Penyidikan 2013](#)

## PENYIDIKAN

### Penyidikan 2013

Ditulis oleh admin.acch. Diposting di [Penyidikan \(/id/berkas/penindakan/penyidikan\)](#). Dilihat: 4898

#### Desember

1. Perkara TPPU sehubungan dengan perbuatan menempatkan, mentransfer, mengalihkan, membelanjakan, membayar, menghibahkan, menitipkan, membawa ke luar negeri, mengubah bentuk, menukarkan dengan mata uang atau surat berharga atau lain atas harta kekayaan yang diketahuinya atau patut diduganya merupakan hasil tindak pidana dengan tujuan menyembunyikan atau menyamarkan asal usul Harta Kekayaan, atau perbuatan menyembunyikan atau menyamarkan asal usul, sumber, lokasi, peruntukan, pengalihan hak-hak, atau kepemilikan yang sebenarnya atas Harta Kekayaan yang diketahuinya atau patut diduganya merupakan hasil tindak pidana atas nama tersangka IKE WIJAYANTO (Plt. Panitera Muda pada Pengadilan Hubungan Industrial Pengadilan Negeri Bandung).
2. Perkara TPK menerima hadiah atau janji padahal diketahui atau patut diduga bahwa hadiah atau janji tersebut diberikan untuk menggerakkan agar melakukan atau tidak melakukan sesuatu dalam jabatannya, yang bertentangan dengan kewajibannya atau hadiah atau janji tersebut diberikan sebagai akibat atau disebabkan karena telah melakukan atau tidak

melakukan sesuatu dalam jabatannya yang bertentangan dengan kewajibannya terkait dengan pengurusan perkara tindak pidana menempatkan keterangan palsu di atas bukti autentik dan pemalsuan atas sertifikat tanah dengan dengan terlapor Sugiharta alias Along atas nama tersangka SUBRI (Kepala Kejaksaan Negeri Praya).

3. Perkara TPK memberi atau menjanjikan sesuatu kepada pegawai negeri atau penyelenggara negara dengan maksud supaya pegawai negeri atau penyelenggara tersebut berbuat atau tidak berbuat sesuatu dalam jabatannya yang bertentangan dengan kewajibannya atau memberi sesuatu kepada pegawai negeri atau penyelenggara negara karena atau berhubungan dengan sesuatu yang bertentangan dengan kewajibannya dilakukan atau tidak dilakukan dalam jabatannya terkait dengan pengurusan perkara tindak pidana menempatkan keterangan palsu di atas bukti autentik dan pemalsuan atas sertifikat tanah dengan dengan terlapor Sugiharta alias Along atas nama tersangka Lusita Anie Razak (Swasta).
4. Perkara TPK memberi atau menjanjikan sesuatu kepada hakim dengan maksud untuk mempengaruhi putusan perkara yang diserahkan kepadanya untuk diadili berkaitan dengan penanganan perkara sengketa Pemilihan Kepala Daerah (Pilkada) Kabupaten Lebak, Propinsi Banten Tahun 2013 di Mahkamah Konstitusi Republik Indonesia atas nama terssangka RATU ATUT CHOSIYAH (Gubernur Banten).

---

## November

1. Perkara TPK dalam Proyek Pembangunan Pusat Pendidikan Pelatihan dan Sekolah Olahraga Nasional (P3SON) di Hambalang TA 2010 13 2012 atas nama tersangka MS (Swasta).
2. Perkara TPK pengadaan Alat Kesehatan Kedokteran Umum Puskesmas Kota Tangerang Selatan APBDP Tahun Anggaran 2012 atas nama tersangka TCW (Swasta).
3. Perkara TPK pengadaan Alat Kesehatan Kedokteran Umum Puskesmas Kota Tangerang Selatan APBDP Tahun Anggaran 2012 atas nama tersangka DP (Swasta).
4. Perkara TPK pengadaan Alat Kesehatan Kedokteran Umum Puskesmas Kota Tangerang Selatan APBDP Tahun Anggaran 2012 atas nama tersangka MJ (Kepala Bidang Sumber Daya Kesehatan dan Promosi Kesehatan (SDK dan Promkes) Dinas Kesehatan Pemkot Tangsel/ PPK).
5. Perkara TPPU sehubungan dengan perbuatan menempatkan, mengalihkan, membelanjakan, membayarkan, menghibahkan, menitipkan, membawa ke luar negeri, mengubah bentuk, menukarkan dengan mata uang, atau surat berharga atau perbuatan lain atas harta kekayaan yang diketahuinya atau patut diduganya merupakan hasil tindak pidana atas nama tersangka RR (Kepala SKK Migas).
6. Perkara TPPU sehubungan dengan perbuatan menempatkan, mengalihkan, membelanjakan, membayarkan, menghibahkan, menitipkan, membawa ke luar negeri, mengubah bentuk, menukarkan dengan mata uang, atau surat berharga atau perbuatan lain atas harta kekayaan

yang diketahuinya atau patut diduganya merupakan hasil tindak pidana atas nama tersangka D (Swasta).

---

## Oktober

1. Perkara TPK menerima hadiah atau janji oleh hakim berkaitan dengan Penanganan Perkara Sengketa Pemilihan Kepala Daerah (Pilkada) Kabupaten Gunung Mas Propinsi Kalimantan Tengah 2013 di Mahkamah Konstitusi RI atas nama tersangka AM (Hakim Konstitusi pada Mahkamah Konstitusi RI).
2. Perkara TPK membantu menerima hadiah atau janji oleh hakim berkaitan dengan Penanganan Perkara Sengketa Pemilihan Kepala Daerah (Pilkada) Kabupaten Gunung Mas Propinsi Kalimantan Tengah 2013 di Mahkamah Konstitusi RI atas nama tersangka CN (Anggota DPR RI 2009 – 2014).
3. Perkara TPK memberi sesuatu kepada hakim dengan maksud untuk mempengaruhi putusan perkara yang diserahkan kepadanya untuk diadili berkaitan dengan Penanganan Perkara Sengketa Pemilihan Kepala Daerah (Pilkada) Kabupaten Gunung Mas Propinsi Kalimantan Tengah atas nama tersangka HB (Bupati Gunung Mas Kalimantan Tengah).
4. Perkara TPK memberi sesuatu kepada hakim dengan maksud untuk mempengaruhi putusan perkara yang diserahkan kepadanya untuk diadili berkaitan dengan Penanganan Perkara Sengketa Pemilihan Kepala Daerah (Pilkada) Kabupaten Gunung Mas Propinsi Kalimantan Tengah atas nama tersangka CNA (Swasta).
5. Perkara TPK membantu menerima hadiah atau janji oleh hakim berkaitan dengan Penanganan Perkara Sengketa Pemilihan Kepala Daerah (Pilkada) Kabupaten Lebak, Propinsi Banten 2013 di Mahkamah Konstitusi RI atas nama tersangka STA (Swasta).
6. Perkara TPK memberi sesuatu kepada hakim dengan maksud untuk mempengaruhi putusan perkara yang diserahkan kepadanya untuk diadili berkaitan dengan Penanganan Perkara Sengketa Pemilihan Kepala Daerah (Pilkada) Kabupaten Lebak Banten Propinsi Banten 2013 di Mahkamah Konstitusi RI atas nama tersangka TCW (Swasta).
7. Perkara TPK menerima hadiah atau janji oleh Hakim berkaitan dengan penanganan perkara yang berada di lingkup kewenangan Mahkamah Konstitusi RI untuk mengadili, padahal diketahui atau patut diduga bahwa hadiah atau janji tersebut diberikan untuk mempengaruhi putusan perkara yang diserahkan kepadanya untuk diadili, dan atau penerimaan gratifikasi atas nama tersangka AM (Hakim Konstitusi pada Mahkamah Konstitusi RI).
8. Perkara TPPU dalam hubungannya dengan perbuatan menempatkan, mentrasfer, mengalihkan, membelanjakan, membayarkan, menghibahkan, menitipkan, membawa ke luar negeri, mengubah bentuk, menukarkan dengan mata uang atau surat berharga atau perbuatan lain atas harta kekayaan yang diketahui atau patut diduganya hasil TPK dengan tujuan menyembunyikan, menyamarkan asal usul harta kekayaan dan atau menyembunyikan atau

menyamarkan asal usul, sumber, lokasi, peruntukan, pengalihan hak-hak atau kepemilikan yg sebenarnya atas harta kekayaan yang diketahuinya atau patut diduganya merupakan hasil TPK atas nama tersangka AM (Hakim Konstitusi pada Mahkamah Konstitusi RI).

---

## September

1. Perkara TPK sehubungan dengan menguntungkan diri sendiri atau orang lain secara melawan hukum atau menyalahgunakan kekuasaannya memaksa seseorang memberikan sesuatu, membayar, atau untuk mengerjakan sesuatu bagi dirinya sendiri, pada tahun 2011 s/d 2013, di Kementerian Energi dan Sumber Daya Mineral atas nama tersangka JW (Menteri ESDM).
2. Perkara TPK sehubungan dengan bersama-sama melakukan atau turut serta melakukan terkait perbuatan Lusita Anie Razak, yaitu : memberi atau menjanjikan sesuatu kepada pegawai negeri atau penyelenggara negara dengan maksud supaya pegawai negeri atau penyelenggara negara tersebut berbuat atau tidak berbuat sesuatu dalam jabatannya yang bertentangan dengan kewajibannya atau memberi sesuatu kepada pegawai negeri atau penyelenggara negara karena atau berhubungan dengan sesuatu yang bertentangan dengan kewajiban dilakukan atau tidak dilakukan dalam jabatannya terkait dengan pengurusan perkara tindak pidana menempatkan keterangan palsu di atas bukti autentik dan pemalsuan atas sertifikat tanah dengan terlapor Sugiharta Alias Along atas nama tersangka BWS (Swasta).
3. Perkara TPK sehubungan dengan memberi atau menjanjikan sesuatu kepada hakim dengan maksud untuk mempengaruhi putusan perkara yang diserahkan kepadanya untuk diadili berkaitan dengan penanganan perkara sengketa Pemilihan Kepala Daerah (Pilkada) Kabupaten Lebak, Propinsi Banten Tahun 2013 di Mahkamah Konstitusi Republik Indonesia atau memberi hadiah atau janji kepada pegawai negeri dengan mengingat kekuasaan atau wewenang yang melekat pada jabatan atau kedudukannya, atau oleh pemberi hadiah atau janji dianggap melekat pada jabatan atau kedudukan tersebut atas nama tersangka AH (Wakil Bupati Lebak) dan K (Anggota DPRD TK I Banten).
4. Perkara TPK sehubungan dengan memberi atau menjanjikan sesuatu kepada pegawai negeri atau penyelenggara negara dengan maksud supaya pegawai negeri atau penyelenggara negara tersebut berbuat atau tidak berbuat sesuatu dalam jabatannya, yang bertentangan dengan kewajibannya terkait dengan Pengajuan Revisi Alih Fungsi Hutan di Provinsi Riau Tahun 2014 kepada Kementrian Kehutanan atas nama tersangka GM (Swasta).
5. Perkara TPK sehubungan dengan Pegawai Negeri atau Penyelenggara Negara yang Menerima Pemberian atau Janji dengan maksud supaya pegawai negeri atau penyelenggara negara tersebut berbuat atau tidak berbuat sesuatu dalam jabatannya, yang bertentangan dengan kewajibannya terkait dengan Pengajuan Revisi Alih Fungsi Hutan di Provinsi Riau Tahun 2014 kepada Kementrian Kehutanan atas nama tersangka AM (Gubernur Riau).

6. Perkara TPK sehubungan dengan bersama-sama atau turut serta F.X. Yohan Yap Als Yohan dalam memberi atau menjanjikan sesuatu kepada Pegawai Negeri atau Penyelenggara Negara terkait pemberian Rekomendasi Tukar Menukar Kawasan Hutan di Kabupaten Bogor atas nama PT. Bukit Jonggol Asri dan dengan sengaja mencegah, merintangi, atau menggagalkan secara langsung atau tidak langsung penyidikan, penuntutan, dan pemeriksaan di sidang pengadilan terhadap tersangka dan terdakwa ataupun para saksi dalam perkara korupsi atas nama tersangka KCK alias ST (Swasta).
- 

## **Agustus**

1. -
- 

## **Juli**

1. Perkara TPK berupa memberi hadiah atau janji terkait dengan penanganan perkara Tindak Pidana Korupsi mengenai penyimpangan dana bantuan sosial Pemerintah Kota Bandung dan Pengadilan Tinggi Jawa Barat dengan terdakwa Rochman (Mantan Bendahara Pengeluaran Sekretariat Daerah Kota Bandung) atas nama tersangka DR (Walikota Bandung).
2. Perkara TPK berupa memberi hadiah atau janji terkait dengan penanganan perkara Tindak Pidana Korupsi mengenai penyimpangan dana bantuan sosial Pemerintah Kota Bandung dan Pengadilan Tinggi Jawa Barat dengan terdakwa Rochman (Mantan Bendahara Pengeluaran Sekretariat Daerah Kota Bandung) atas nama tersangka ES (Sekda Kota Bandung).
3. Perkara TPK dalam pelaksanaan Proyek Pembangunan Dermaga Bongkar yang dibiayai APBN TA 2006 – 2010 atas nama tersangka HS (Swasta).
4. Perkara TPK dalam pelaksanaan Proyek Pembangunan Dermaga Bongkar yang dibiayai APBN TA 2006 – 2010 atas nama tersangka RI (Selaku PPK Satker Kawasan Perdagangan Bebas dan Pelabuhan Bebas Sabang dan BPKS (Badan Pengusahaan Kawasan Perdagangan Bebas dan Pelabuhan Bebas Sabang).
5. Perkara TPK sebagai orang yang bersama-sama melakukan atau menyuruh melakukan atau turut serta melakukan terkait dengan perbuatan Kartini Juliana Marpaung terkait dengan penanganan perkara TPK penyimpangan anggaran pemeliharaan mobil dinas Sekretariat DPRD Kab. Grobogan TA 2006 – 2008 di Pengadilan Negeri Semarang dengan terdakwa Muhammad Yaeni atas nama tersangka P (Majelis Hakim Pengadilan Tindak Pidana Korupsi pada Pengadilan Negeri Semarang).
6. Perkara TPK sebagai orang yang bersama-sama melakukan atau menyuruh melakukan atau turut serta melakukan terkait dengan perbuatan Kartini Juliana Marpaung terkait dengan penanganan perkara TPK penyimpangan anggaran pemeliharaan mobil dinas Sekretariat DPRD Kab. Grobogan TA 2006 – 2008 di Pengadilan Negeri Semarang dengan terdakwa

Muhammad Yaeni atas nama tersangka A (Majelis Hakim Pengadilan Tindak Pidana Korupsi pada Pengadilan Negeri Semarang).

7. Perkara TPK berupa pegawai negeri atau penyelenggara negara yang menerima pemberian atau janji dengan maksud supaya pegawai negeri atau penyelenggara negara tersebut berbuat atau tidak berbuat sesuatu dalam jabatannya yang bertentangan dengan kewajibannya terkait dengan pengurusan kasasi kasus pidana penipuan dengan terdakwa Hutomo Wijaya Ongowarsito atas nama tersangka MCB (Swasta).
  8. Perkara TPK berupa pegawai negeri atau penyelenggara negara yang menerima pemberian atau janji dengan maksud supaya pegawai negeri atau penyelenggara negara tersebut berbuat atau tidak berbuat sesuatu dalam jabatannya yang bertentangan dengan kewajibannya terkait dengan pengurusan kasasi kasus pidana penipuan dengan terdakwa Hutomo Wijaya Ongowarsito atas nama tersangka DS (Pegawai pada Mahkamah Agung RI).
  9. Perkara TPK berupa penerimaan hadiah atau janji oleh penyelenggara negara terkait dengan Pemeriksaan Pajak di PT Delta Internusa, PT Nusa Raya Cipta dan perusahaan lainnya atas nama tersangka ED (PPNS Pajak).
  10. Perkara TPK berupa penerimaan hadiah atau janji oleh penyelenggara negara terkait dengan Pemeriksaan Pajak di PT Delta Internusa, PT Nusa Raya Cipta dan perusahaan lainnya atas nama tersangka MDI (PPNS Pajak)..
- 

## **Juni**

1. Perkara TPK dalam pengadaan dan instalasi infrastruktur IT Gedung Perpustakaan Pusat Universitas Indonesia (UI) Tahun 2010 – 2011 atas nama tersangka TN (Wakil Rektor Bidang SDM, Keuangan dan Administrasi Umum Universitas Indonesia).
  2. Perkara TPK berupa memberikan atau menjanjikan sesuatu kepada pegawai negeri atau penyelenggara negara yaitu Amran Batalipu selaku Bupati Buol terkait dengan Proses Pengurusan Hak Guna Usaha (HGU) Perkebunan atas nama PT Cipta Cakra Murdaya dan atau PT Hardaya Inti Plantation yang terletak di Kecamatan Bukal Kabupaten Buol atas nama tersangka TL (Swasta).
- 

## **Mei**

1. Perkara TPK pemberian sesuatu oleh PN dan atau pegawai negeri dan atau pihak-pihak tertentu Pemerintah Kabupaten Mandailing Natal kepada PN atau pegawai negeri dan atau pihak-pihak tertentu Pemerintah Propinsi Sumatera Utara terkait alokasi Dana Bantuan Daerah (DBD) tahun 2013 atas nama tersangka SRG (Swasta).

2. Perkara TPK pemberian sesuatu oleh PN dan atau pegawai negeri dan atau pihak-pihak tertentu Pemerintah Kabupaten Mandailing Natal kepada PN atau pegawai negeri dan atau pihak-pihak tertentu Pemerintah Propinsi Sumatera Utara terkait alokasi Dana Bantuan Daerah (DBD) tahun 2013 atas nama tersangka HIB (Bupati Mandailing Natal).
  3. Perkara TPK pemberian sesuatu oleh PN dan atau pegawai negeri dan atau pihak-pihak tertentu Pemerintah Kabupaten Mandailing Natal kepada PN atau pegawai negeri dan atau pihak-pihak tertentu Pemerintah Propinsi Sumatera Utara terkait alokasi Dana Bantuan Daerah (DBD) tahun 2013 atas nama tersangka KRL (Plt. Kadis PU Kabupaten Mandailing Natal).
  4. TPK berupa penyuapan terkait pemeriksaan pajak yang diduga melibatkan pemeriksa pajak dengan wajib pajak PT Master Steel atas nama dengan tersangka MDI (PPNS Pajak).
  5. TPK berupa penyuapan terkait pemeriksaan pajak yang diduga melibatkan pemeriksa pajak dengan wajib pajak PT Master Steel dengan tersangka ED (PPNS Pajak).
  6. TPK berupa penyuapan terkait pemeriksaan pajak yang diduga melibatkan pemeriksa pajak dengan wajib pajak PT Master Steel dengan tersangka TM (Swasta).
  7. TPK berupa penyuapan terkait pemeriksaan pajak yang diduga melibatkan pemeriksa pajak dengan wajib pajak PT Master Steel dengan tersangka DS (Swasta).
  8. TPK berupa penyuapan terkait pemeriksaan pajak yang diduga melibatkan pemeriksa pajak dengan wajib pajak PT Master Steel dengan tersangka EK (Swasta).
- 

## **April**

1. Perkara TPK berupa Pegawai Negeri/Penyelenggara Negara dengan maksud menguntungkan diri sendiri atau orang lain secara melawan hukum atau dengan menyalahgunakan kekuasaannya memaksa seseorang memberikan sesuatu terkait dengan pemeriksaan pajak atas nama tersangka PR (Penyidik Pegawai Negeri Sipil/PPNS pada Kanwil Dirjen Pajak Jakarta Pusat).
2. Perkara TPK berupa memberi atau menjanjikan sesuatu kepada Penyelenggara Negara terkait dengan pengurusan Kuota Impor Daging pada Kementerian Pertanian atas nama tersangka MEL (Swasta).
3. Perkara TPK menerima hadiah atau janji dari PT Garindo Perkasa untuk memperoleh tanah seluas +/- 1.000.000 m<sup>2</sup> yang diperlukan dalam rangka pembangunan Tempat Pemakaman Bukan Umum (TPBU) di Desa Antajaya Kecamatan Tanjungsari Kabupaten Bogor atas nama tersangka ID (Ketua DPRD Kabupaten Bogor).
4. Perkara TPK memberi hadiah atau janji kepada Pegawai Negeri/Penyelenggara Negara terkait dengan Pemberian Ijin Lokasi untuk kegiatan pembangunan Tempat Pemakaman Bukan Umum (TPBU) seluas +/- 1.000.000 m<sup>2</sup> di Desa Antajaya Kecamatan Tanjungsari Kabupaten Bogor atas nama tersangka SS (Swasta).

5. Perkara TPK menerima hadiah atau janji dari PT Garindo Perkasa untuk memperoleh tanah seluas +/- 1.000.000 m<sup>2</sup> yang diperlukan dalam rangka pembangunan Tempat Pemakaman Bukan Umum (TPBU) di Desa Antajaya Kecamatan Tanjungsari Kabupaten Bogor atas nama tersangka UJ (PNS Dinas Pendidikan Kab Bogor) dan LWS (Pegawai Honorer pada Pemerintah Kabupaten Bogor).
- 

## **Maret**

1. -
- 

## **Februari**

1. Perkara TPK turut serta dengan H.Tengku Azmun Jaafar terkait dengan penilaian dan pengesahan Bagan Kerja Usaha pemanfaatan Hasil Hutan Kayu pada Hutan Tanaman (BKUPHHKHT) pada areal yang diberikan ijin UPHHK-HT tahun 2001 – 2006 di Wilayah Kabupaten Pelalawan kepada sejumlah perusahaan yang tidak sesuai dengan ketentuan yang berlaku dan melakukan TPK terkait dengan penilaian dan pengesahan BKUPHHKHT pada areal yang diberikan IUPHHK-HT oleh Arwin AS tahun 2001 – 2007 di Wilayah Kabupaten Siak kepada sejumlah perusahaan yang tidak sesuai dengan ketentuan yang berlaku atas nama tersangka RZ (Gubernur Riau).
  2. Perkara TPK turut serta dengan Lukman Abbas dalam melakukan TPK menerima hadiah atau janji terkait dengan Pengajuan Anggaran oleh Pemerintah Pemda Prop Riau kepada Kemenpora dan menerima hadiah atau janji terkait dengan pelaksanaan kelanjutan pekerjaan venues PON XVIII Riau atas nama tersangka RZ (Gubernur Riau).
  3. Perkara TPK turut serta dengan Lukman Abbas dalam melakukan TPK memberi hadiah atau janji kepada M Faisal Aswan dan M Dunir terkait dengan persetujuan DPRD Prop Riau dalam usulan perubahan Perda Prop Riau No.6 Th 2010 tentang Peningkatan Dana Anggaran Kegiatan Tahun Jamak untuk Pembangunan Venues Kegiatan PON XVIII Prop Riau atas nama tersangka RZ (Gubernur Riau).
  4. Perkara TPK penerimaan hadiah atau janji terkait dengan proses perencanaan dan pelaksanaan pembangunan proses Pusat Pendidikan, Pelatihan dan Sekolah Olahraga Nasional (P3SON) di Desa Hambalang, Kec Cietereup Kab Bogor Prop Jawa Barat atau proyek-proyek lainnya atas nama tersangka AU (Anggota DPR RI).
- 

## **Januari**

1. Perkara TPK dalam pengadaan paket pekerjaan penggandaan kitab suci Al Quran APBN-P 2011 dan APBN 2012 pada Direktorat Bimas Islam Kementerian Agama atas nama tersangka AJ



(PPK pada Ditjen Bimas Islam Kementerian Agama RI).

2. Perkara TPPU dalam hubungannya dengan perbuatan menempatkan, mentransfer, mengubah bentuk, dan atau menyembunyikan/menyamarkan asal usul, sumber, lokasi, kepemilikan, dan atau perbuatan menerima atau menguasai penempatan, pentransferan, pembayaran atau menggunakan harta kekayaan yang diketahui atau patut diduga merupakan hasil tindak pidana atas nama tersangka DS (Gubernur Akademi Kepolisian).
3. Perkara TPK menerima hadiah atau janji terkait dengan maksud supaya pegawai negeri atau penyelenggara negara tersebut berbuat atau tidak berbuat sesuatu dalam jabatannya yang bertentangan dengan kewajibannya atas nama tersangka ZR (Ketua DPRD Kab. Seluma Periode 2009 – 2014).
4. Perkara TPK menerima hadiah atau janji terkait dengan maksud supaya pegawai negeri atau penyelenggara negara tersebut berbuat atau tidak berbuat sesuatu dalam jabatannya yang bertentangan dengan kewajibannya atas nama tersangka PW (Anggota DPRD Kab. Seluma Periode 2009 – 2014).
5. Perkara TPK menerima hadiah atau janji terkait dengan maksud supaya pegawai negeri atau penyelenggara negara tersebut berbuat atau tidak berbuat sesuatu dalam jabatannya yang bertentangan dengan kewajibannya atas nama tersangka MT (Wakil Ketua DPRD Kab. Seluma Periode 2009 – 2014).
6. Perkara TPK menerima hadiah atau janji terkait dengan maksud supaya pegawai negeri atau penyelenggara negara tersebut berbuat atau tidak berbuat sesuatu dalam jabatannya yang bertentangan dengan kewajibannya atas nama tersangka JS (Wakil Ketua DPRD Kab. Seluma).
7. Perkara TPK memberi atau menjanjikan sesuatu kepada penyelenggara negara terkait dengan pengurusan kuota impor daging pada Kementerian Pertanian atas nama tersangka AAE (Swasta).
8. Perkara TPK memberi atau menjanjikan sesuatu kepada penyelenggara negara terkait dengan pengurusan kuota impor daging pada Kementerian Pertanian atas nama tersangka JE (Swasta).
9. Perkara TPK berupa penerimaan hadiah atau janji untuk Penyelenggara Negara terkait dengan pengurusan kuota impor daging pada Kementerian Pertanian atas nama tersangka AF (Swasta).
10. Perkara TPK berupa penerimaan hadiah atau janji untuk Penyelenggara Negara terkait dengan pengurusan kuota impor daging pada Kementerian Pertanian atas nama tersangka LHI (Anggota DPR RI/Presiden Partai PKS).

---

**Share :**

Bagikan 0

Tweet

Penyidikan (/id/berkas/penindakan/penyidikan)

Penuntutan (/id/berkas/penindakan/penuntutan)

Inkracht (/id/berkas/penindakan/inkracht)

Jejak Kasus (/id/jejak-kasus)















## LINK

[TENTANG ACCH \(/ID/TENTANG-ACCH\).](#)

[DISCLAIMER \(/ID/DISCLAIMER\).](#)

[KETENTUAN \(/ID/KETENTUAN\).](#)

[SITEMAP \(/ID/SITEMAP\).](#)

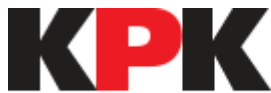

**Komisi Pemberantasan Korupsi**

[\(HTTPS://WWW.KPK.GO.ID/\)](https://www.kpk.go.id/)

## REDAKSI ACCH

KOMISI PEMBERANTASAN KORUPSI  
JL. KUNINGAN PERSADA KAV. 4 JAKARTA 12950  
TELP: (021) 2557 8300 EXT. 8642  
EMAIL: [ACCH@KPK.GO.ID](mailto:ACCH@KPK.GO.ID)  
([MAILTO:ACCH@KPK.GO.ID](mailto:ACCH@KPK.GO.ID)).
