# Supplementary material for: Democratization, leader education and growth: firm-level evidence from Indonesia
Source: Springer Nature journal article supplement (doi:10.1007/s10887-022-09221-5), 2023-02-15
Supplement: MOESM2 [file Penyidikan 2014.pdf › Data/Mayor-level corruption dataset (incl sources)/KPK Penyidikan 2006-/Penyidikan 2014.pdf]

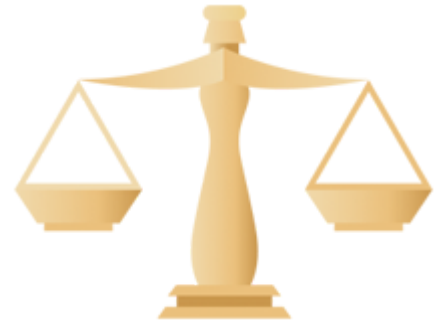

# PENINDAKAN

Menyajikan informasi perkembangan penanganan tindak pidana korupsi yang dilakukan oleh Komisi Pemberantasan Korupsi.

[Beranda \(/id/\)](#) / [Berkas](#) / [PENINDAKAN](#) / [Penyidikan \(/id/berkas/penindakan/penyidikan\)](#) / [Penyidikan 2014](#)

## PENYIDIKAN

### Penyidikan 2014

Ditulis oleh admin.acch. Diposting di [Penyidikan \(/id/berkas/penindakan/penyidikan\)](#). Dilihat: 5062

#### Desember

1. Perkara TPK sehubungan dengan menerima hadiah atau janji terkait dengan jual beli gas alam untuk pembangkit listrik di Gresik dan Gili Timur Bangkalan Madura, Jawa Timur dan Proyek-proyek lainnya atas nama tersangka H. FUAD AMIN (Ketua DPRD Kab. Bangkalan) dkk.
2. Perkara TPK sehubungan dengan memberi hadiah atau janji terkait dengan jual beli gas alam untuk pembangkit listrik di Gresik dan Gili Timur Bangkalan Madura, Jawa Timur dan Proyek-proyek lainnya atas nama tersangka IR. A. BAMBANG D. (Swasta) dkk.
3. Perkara TPK sehubungan dengan menerima hadiah atau janji terkait dengan jual beli gas alam untuk pembangkit listrik di Gresik dan Gili Timur Bangkalan Madura, Jawa Timur dan Proyek-proyek lainnya atas nama tersangka ABDUR ROUF (Swasta) dkk.
4. Perkara TPK sehubungan dengan Proses Permohonan Izin Pengembangan Kawasan Wisata di Lombok Barat Tahun 2010 s.d. 2012 atas nama tersangka ZAINI ARONY (Bupati Lombok Barat).

5. Perkara TPK sehubungan dengan Menerima hadiah atau janji terkait dengan Jual Beli Gas Alam Untuk Pembangkit Listrik di Gresik dan Gili Timur Bangkalan Madura, Jawa Timur dan perbuatan penerimaan lainnya atas nama tersangka H. FUAD AMIN (Bupati Kabupaten Bangkalan).
  6. Perkara TPPU sehubungan dengan perbuatan menempatkan, mentransfer, mengalihkan, membelanjakan, membayarkan, menghibahkan, menitipkan, membawa ke luar negeri, mengubah bentuk, menukarkan dengan mata uang atau surat berharga atau perbuatan lain atas Harta Kekayaan yang diketahui atau patut diduga merupakan hasil tindak pidana korupsi dengan tujuan menyembunyikan atau menyamarkan asal usul Harta Kekayaan atas nama tersangka H. FUAD AMIN (Bupati Kabupaten Bangkalan) dkk.
- 

## **November**

1. -
- 

## **Oktober**

1. Perkara TPPU sehubungan dengan menempatkan, mentransfer, mengalihkan, membelanjakan, membayarkan, menghibahkan, menitipkan, membawa ke luar negeri, mengubah bentuk, menukarkan dengan mata uang atau surat berharga atau perbuatan lain atas Harta Kekayaan yang diketahui atau patut diduga merupakan hasil tindak pidana korupsi dengan tujuan menyembunyikan atau menyamarkan asal usul Harta Kekayaan atas nama tersangka ASW dan NLF (Bupati Karawang dan istrinya (PNS)).
  2. Perkara TPK sehubungan dengan Penyalahgunaan kewenangan dalam menggunakan Dana Pendidikan Luar Sekolah pada Sub Dinas PLS Dinas Pendidikan dan Kebudayaan Provinsi Nusa Tenggara Timur Tahun Anggaran 2007 atas nama tersangka JM (Kadis P dan K Provinsi NTT/KPA).
  3. Perkara TPK sehubungan dengan Penyalahgunaan kewenangan dalam menggunakan Dana Pendidikan Luar Sekolah pada Sub Dinas PLS Dinas Pendidikan dan Kebudayaan Provinsi Nusa Tenggara Timur Tahun Anggaran 2007 atas nama tersangka MDT (Kasubdin PLS Provinsi NTT/PPK).
- 

## **September**

1. Perkara TPK sehubungan dengan menguntungkan diri sendiri atau orang lain secara melawan hukum atau menyalahgunakan kekuasaannya memaksa seseorang memberikan sesuatu, membayar, atau untuk mengerjakan sesuatu bagi dirinya sendiri, pada tahun 2011 s/d 2013, di Kementerian Energi dan Sumber Daya Mineral atas nama tersangka JW (Menteri ESDM).

2. Perkara TPK sehubungan dengan bersama-sama melakukan atau turut serta melakukan terkait perbuatan Lusita Anie Razak, yaitu : memberi atau menjanjikan sesuatu kepada pegawai negeri atau penyelenggara negara dengan maksud supaya pegawai negeri atau penyelenggara negara tersebut berbuat atau tidak berbuat sesuatu dalam jabatannya yang bertentangan dengan kewajibannya atau memberi sesuatu kepada pegawai negeri atau penyelenggara negara karena atau berhubungan dengan sesuatu yang bertentangan dengan kewajiban dilakukan atau tidak dilakukan dalam jabatannya terkait dengan pengurusan perkara tindak pidana menempatkan keterangan palsu di atas bukti autentik dan pemalsuan atas sertifikat tanah dengan terlapor Sugiharta Alias Along atas nama tersangka BWS (Swasta).
3. Perkara TPK sehubungan dengan memberi atau menjanjikan sesuatu kepada hakim dengan maksud untuk mempengaruhi putusan perkara yang diserahkan kepadanya untuk diadili berkaitan dengan penanganan perkara sengketa Pemilihan Kepala Daerah (Pilkada) Kabupaten Lebak, Propinsi Banten Tahun 2013 di Mahkamah Konstitusi Republik Indonesia atau memberi hadiah atau janji kepada pegawai negeri dengan mengingiat kekuasaan atau wewenang yang melekat pada jabatan atau kedudukannya, atau oleh pemberi hadiah atau janji dianggap melekat pada jabatan atau kedudukan tersebut atas nama tersangka AH (Wakil Bupati Lebak) dan K (Anggota DPRD TK I Banten).
4. Perkara TPK sehubungan dengan memberi atau menjanjikan sesuatu kepada pegawai negeri atau penyelenggara negara dengan maksud supaya pegawai negeri atau penyelenggara negara tersebut berbuat atau tidak berbuat sesuatu dalam jabatannya, yang bertentangan dengan kewajibannya terkait dengan Pengajuan Revisi Alih Fungsi Hutan di Provinsi Riau Tahun 2014 kepada Kementrian Kehutanan atas nama tersangka GM (Swasta).
5. Perkara TPK sehubungan dengan Pegawai Negeri atau Penyelenggara Negara yang Menerima Pemberian atau Janji dengan maksud supaya pegawai negeri atau penyelenggara negara tersebut berbuat atau tidak berbuat sesuatu dalam jabatannya, yang bertentangan dengan kewajibannya terkait dengan Pengajuan Revisi Alih Fungsi Hutan di Provinsi Riau Tahun 2014 kepada Kementrian Kehutanan atas nama tersangka AM (Gubernur Riau).
6. Perkara TPK sehubungan dengan bersama-sama atau turut serta F.X. Yohan Yap Als Yohan dalam memberi atau menjanjikan sesuatu kepada Pegawai Negeri atau Penyelenggara Negara terkait pemberian Rekomendasi Tukar Menukar Kawasan Hutan di Kabupaten Bogor atas nama PT. Bukit Jonggol Asri dan dengan sengaja mencegah, merintangi, atau menggagalkan secara langsung atau tidak langsung penyidikan, penuntutan, dan pemeriksaan di sidang pengadilan terhadap tersangka dan terdakwa ataupun para saksi dalam perkara korupsi atas nama tersangka KCK alias ST (Swasta).

1. Perkara TPK sehubungan dengan memberi atau menjanjikan sesuatu kepada M. Akil Mochtar selaku Hakim Mahkamah Konstitusi dengan maksud untuk mempengaruhi putusan perkara sengketa Pemilihan Kepala Daerah (Pilkada) Kabupaten Tapanuli Tengah Tahun 2011 yang diserahkan kepadanya untuk diadili atas nama tersangka RBS (Bupati Tapanuli Tengah periode tahun 2011 – 2016).
  2. Perkara TPK sehubungan dengan Kegiatan Pembangunan Wisma Atlet dan Gedung Serbaguna Pemerintah Provinsi Sumatera Selatan Tahun 2010-2011 atas nama tersangka RA (Ketua Komite Pembangunan Wisma Atlet Sumatera Selatan).
  3. Perkara TPK sehubungan dengan Pengadaan dan Pelaksanaan Proyek Pembangunan Diklat Pelayaran Sorong Tahap III pada Pusat Pengembangan Sumber Daya Manusia Perhubungan Laut, Badan Pengembangan Sumber Daya Manusia Perhubungan, Kementerian Perhubungan Republik Indonesia TA 2011 atas nama tersangka BRK (Swasta).
  4. Perkara TPK sehubungan dengan Pengadaan dan Pelaksanaan Proyek Pembangunan Diklat Pelayaran Sorong Tahap III pada Pusat Pengembangan Sumber Daya Manusia Perhubungan Laut, Badan Pengembangan Sumber Daya Manusia Perhubungan, Kementerian Perhubungan Republik Indonesia TA 2011 atas nama tersangka S (Pejabat Pembuat Komitmen Satuan Kerja Pusat Pengembangan Sumber Daya Manusia Perhubungan Laut, Badan Pengembangan Sumber Daya Manusia Perhubungan).
  5. Perkara TPK sehubungan dengan Pengadaan dan Pelaksanaan Proyek Pembangunan Diklat Pelayaran Sorong Tahap III pada Pusat Pengembangan Sumber Daya Manusia Perhubungan Laut, Badan Pengembangan Sumber Daya Manusia Perhubungan, Kementerian Perhubungan Republik Indonesia TA 2011 atas nama tersangka I (Ketua Panitia Pengadaan Barang dan Jasa Satuan Kerja Pusat Pengembangan Sumber Daya Manusia Perhubungan Laut, Badan Pengembangan Sumber Daya Manusia Perhubungan).
- 

## **Juli**

1. Perkara TPK sehubungan dengan sengaja mencegah, merintangi atau menggagalkan secara langsung maupun tidak langsung penyidikan, penuntutan, dan pemeriksaan di sidang pengadilan terhadap tersangka atau terdakwa ataupun para saksi dalam perkara korupsi, dan dengan sengaja tidak memberi keterangan atau memberi keterangan yang tidak benar pada persidangan atas nama M. Akil Mochtar di Pengadilan Tindak Pidana Korupsi Jakarta atas nama tersangka ME (Swasta).
2. Perkara TPK sehubungan dengan Pegawai negeri atau penyelenggara negara yang dengan maksud menguntungkan diri sendiri atau orang lain secara melawan hukum atau dengan menyalahgunakan kekuasaannya memaksa seseorang memberikan sesuatu terkait pengurusan izin Surat Persetujuan Pemanfaatan Ruang (SPPR) atas nama PT. Tatar Kertabumi

di Kabupaten Karawang atas nama tersangka ASW (Bupati Karawang) dan NLF (Mantan Anggota DPRD Kabupaten Karawang).

3. Perkara TPK sehubungan dengan kegiatan Detail Engineering Design (DED) PLTA sungai Memberamo dan sungai Urumuka tahun 2009 dan 2010 di Provinsi Papua atas nama tersangka LD (Swasta).
  4. Perkara TPK sehubungan dengan kegiatan Detail Engineering Design (DED) PLTA sungai Memberamo dan sungai Urumuka tahun 2009 dan 2010 di Provinsi Papua atas nama tersangka BS (Gubernur Papua periode tahun 2006 s.d. 2011).
  5. Perkara TPK sehubungan dengan turut serta dan bersama-sama dengan Barnabas Suebu dalam kegiatan Detail Engineering Design (DED) PLTA sungai Memberamo dan sungai Urumuka tahun 2009 dan 2010 di Provinsi Papua atas nama tersangka JJK (Kepala Dinas Pertambangan dan Energi Provinsi Papua periode tahun 2008 s.d. 2011).
- 

## **Juni**

1. Perkara TPK sehubungan dengan memberi atau menjanjikan sesuatu kepada hakim dengan maksud untuk mempengaruhi putusan perkara yang diserahkan kepadanya untuk diadili terkait dengan sengketa pemilihan kepala daerah Kota Palembang di Mahkamah Konstitusi tahun 2013 dan dengan sengaja tidak memberikan keterangan atau memberikan keterangan yang tidak benar terkait dengan persidangan atas nama terdakwa M.Akil Mochtar di pengadilan tindak pidana korupsi Jakarta atas nama tersangka RH (Walikota Palembang) dan M (Swasta).
  2. Perkara TPK sehubungan dengan memberi atau menjanjikan sesuatu kepada pegawai negeri atau penyelenggara negara dengan maksud supaya pegawai negeri atau penyelenggara negara tersebut berbuat atau tidak berbuat sesuatu dalam jabatannya, yang bertentangan dengan kewajibannya terkait dengan Pengurusan APBN-P TA 2014 pada Kementerian PDT untuk Proyek Pembangunan TALUD di Kabupaten Biak Numfor Provinsi Papua atas nama tersangka TR (Swasta).
  3. Perkara TPK sehubungan dengan Pegawai Negeri atau Penyelenggara Negara yang Menerima Pemberian atau Janji dengan maksud supaya pegawai negeri atau penyelenggara negara tersebut berbuat atau tidak berbuat sesuatu dalam jabatannya, yang bertentangan dengan kewajibannya terkait dengan Pengurusan APBN-P TA 2014 pada Kementerian PDT untuk Proyek Pembangunan TALUD di Kabupaten Biak Numfor Provinsi Papua atas nama tersangka YS (Bupati Biak Numfor).
- 

## **Mei**

1. Perkara TPK sehubungan dengan Pelaksanaan Kerjasama Rehabilitasi, Kelola dan Transfer untuk Instalasi Pengolahan Air antara PDAM Kota Makassar dengan pihak swasta periode tahun 2006 – 2011 atas nama tersangka IAS (Walikota Makassar).
  2. Perkara TPK sehubungan dengan Pelaksanaan Kerjasama Rehabilitasi, Kelola dan Transfer untuk Instalasi Pengolahan Air antara PDAM Kota Makassar dengan pihak swasta periode tahun 2006 – 2011 atas nama tersangka HW (Direktur Utama PT. Traya dan PT. Traya Tirta Makassar).
  3. Perkara TPK sehubungan dengan memberi atau menjanjikan sesuatu kepada Pegawai Negeri atau Penyelenggara Negara terkait pemberian Rekomendasi Tukar Menukar Kawasan Hutan di Kabupaten Bogor atas nama PT. Bukit Jonggol Asri atas nama tersangka YY (Swasta).
  4. Perkara TPK sehubungan dengan menerima hadiah atau janji terkait pemberian Rekomendasi Tukar Menukar Kawasan Hutan di Kabupaten Bogor atas nama PT. Bukit Jonggol Asri atas nama tersangka RY (Bupati Bogor).
  5. Perkara TPK sehubungan dengan bersama-sama atau turut serta Rachmat Yasin selaku Bupati Bogor dalam menerima hadiah atau janji terkait pemberian Rekomendasi Tukar Menukar Kawasan Hutan di Kabupaten Bogor atas nama PT. Bukit Jonggol Asri atas nama tersangka MZ (Kepala Dinas Pertanian dan Kehutanan Kabupaten Bogor).
  6. Perkara TPK sehubungan dengan menerima hadiah atau janji terkait penerapan Anggaran Pendapatan dan Belanja Negara Perubahan (APBN-P) TA 2013 Kementerian Energi dan Sumber Daya Mineral (ESDM) oleh Komisi VII DPR RI dan kegiatan lainnya atas nama tersangka SB (Ketua Komisi VII DPR RI periode Tahun 2009 s.d. 2014).
  7. Perkara TPK sehubungan dengan menerima hadiah atau janji terkait rekomendasi penyesuaian Formula Harga Gas untuk PT. Kaltim Parna Industri kepada Kepala SKK Migas atas nama tersangka AMS (Presiden Direktur PT. Kaltim Parna Industri).
  8. Perkara TPK sehubungan dengan Penyelenggaraan Ibadah Haji tahun 2012 – 2013 atas nama tersangka SDA (Menteri Agama RI).
- 

## **April**

1. Perkara TPK sehubungan dengan penerimaan hadiah terkait dengan kegiatan usaha PT. Mitra Maju Sukses dan/atau Group di Wilayah Kabupaten Tanah Laut Provinsi Kalimantan Selatan yang dilakukan oleh tersangka ADRIANSYAH.
  2. Perkara TPK sehubungan dengan pemberian hadiah terkait dengan kegiatan usaha PT. Mitra Maju Sukses dan/atau Group di Wilayah Kabupaten Tanah Laut Provinsi Kalimantan Selatan yang dilakukan oleh tersangka ANDREW HIDAYAT.
- 

## **Maret**

1. Perkara TPPU sehubungan dengan perbuatan menempatkan, mentransfer, mengalihkan, membelanjakan, membayarkan, menghibahkan, menitipkan, mengubah bentuk, menukarkan dengan mata uang dan atau perbuatan menerima atau menguasai penempatan, pentransferan, pembayaran, hibah, sumbangan, penitipan atau menggunakan harta kekayaan yang patut diketahui atau patut diduga merupakan hasil tindak pidana atas nama tersangka HS (Swasta).
  2. Perkara TPK sehubungan dengan pelaksanaan proyek pembangunan dermaga bongkar pada kawasan perdagangan bebas dan pelabuhan bebas Sabang yang dibiayai Anggaran Pendapatan dan Belanja Negara (APBN) TA 2006 – 2010 atas nama tersangka SA.
- 

## **Februari**

1. Perkara TPK dengan sengaja tidak memberikan keterangan atau memberikan keterangan yang tidak benar dalam persidangan perkara TPK pada PN Pekanbaru dan Pembantuan melakukan perbuatan penerimaan hadiah atau janji yang dilakukan oleh Terdakwa Rusli Zainal terkait pelaksanaan kelanjutan PON XVIII Riau atas nama tersangka SF (Ajudan Gubernur Riau).
  2. Perkara TPPU sehubungan dengan perbuatan menempatkan, mentransfer, mengalihkan, membelanjakan, membayarkan, menghibahkan, menitipkan, membawa ke luar negeri, mengubah bentuk, menukarkan dengan mata uang atau surat berharga atau perbuatan lain atas harta kekayaan yang diketahui atau patut diduga merupakan hasil tindak pidana korupsi dengan tujuan menyembunyikan atau menyamarkan asal usul harta kekayaan dan atau menyembunyikan atau menyamarkan asal usul sumber, lokasi, peruntukkan, pengalihan hak-hak, atau kepemilikan yang sebenarnya atas harta kekayaan yang diketahuinya atau patut diduga merupakan hasil tindak pidana korupsi atas nama tersangka AU (Anggota DPR RI).
  3. Perkara TPK bersama-sama melakukan atau menyuruh melakukan atau turut serta melakukan terkait perbuatan Setya Budi Tejo Cahyono yaitu : menerima pemberian atau janji terkait dengan penanganan perkara TPK mengenai penyimpangan dana bantuan sosial Pemerintah Kota Bandung TA-2009 s/d TA-2010 di Pengadilan Tindak Pidana Korupsi pada Pengadilan Negeri Bandung dan Pengadilan Tinggi Jawa Barat dengan terdakwa Rochman selaku mantan Bendahara Pengeluaran Sekretariat Daerah Kota Bandung dan kawan-kawan (dkk) atas nama tersangka RC (Hakim Ad-Hoc Pengadilan Tindak Pidana Korupsi pada PN Bandung).
  4. Perkara TPK bersama-sama melakukan atau menyuruh melakukan atau turut serta melakukan terkait perbuatan Setya Budi Tejo Cahyono yaitu : menerima pemberian atau janji terkait dengan penanganan perkara banding TPK mengenai penyimpangan dana bantuan sosial Pemerintah Kota Bandung TA-2009 s/d TA-2010 di Pengadilan Tindak Pidana Korupsi pada Pengadilan Negeri Bandung dan Pengadilan Tinggi Jawa Barat dengan terdakwa Rochman selaku mantan Bendahara Pengeluaran Sekretariat Daerah Kota Bandung dan kawan-kawan atas nama tersangka PSS (Hakim Tinggi pada Pengadilan Tinggi Jawa Barat).
-

1. Perkara TPK yaitu pegawai negeri atau penyelenggara negara yang dengan maksud menguntungkan diri sendiri atau orang lain secara melawan hukum, atau dengan menyalahgunakan kekuasaannya memaksa seseorang memberikan sesuatu, membayar, dan atau menerima pembayaran dengan potongan, atau untuk mengerjakan sesuatu bagi dirinya sendiri; atau pegawai negeri atau penyelenggara negara yang menerima hadiah atau janji padahal diketahui atau patut diduga, bahwa hadiah atau janji tersebut diberikan untuk menggerakkan agar melakukan sesuatu atau disebabkan karena telah melakukan atau tidak melakukan sesuatu yang bertentangan dengan kewajibannya atau diberikan karena kekuasaan atau kewenangan yang berhubungan dengan jabatannya atas nama tersangka RAC (Gubernur Banten).
2. Perkara TPK pengadaan sarana dan prasarana alat kesehatan dan pengadaan lainnya di lingkungan Pemerintah Provinsi Banten Tahun 2011 – 2013 atas nama tersangka RAC (Gubernur Banten).
3. Perkara TPK pengadaan sarana dan prasarana alat kesehatan dan pengadaan lainnya di lingkungan Pemerintah Provinsi Banten Tahun 2011 s.d. 2013 atas nama tersangka TCW (Swasta).
4. Perkara TPK menerima hadiah atau janji terkait kegiatan pada Kementerian Energi dan Sumber Daya Mineral dan kegiatan lainnya atas nama tersangka WK (Sekretaris Jenderal Kementerian Energi dan Sumber Daya Mineral).
5. Perkara TPK penerimaan hadiah atau janji terkait penanganan investasi di CV. Gold Aset / PT. AXO Capital Futures dan atau terkait jabatan Kepala Bappebti atas nama tersangka SRS (Kepala Bappebti).
6. Perkara TPPU sehubungan dengan dengan perbuatan menempatkan, mentransfer, mengalihkan, membelanjakan, membayarkan, menghibahkan, menitipkan, membawa ke luar negeri, mengubah bentuk, menukarkan dengan mata uang atau surat berharga atau perbuatan lain atas harta kekayaan yang diketahui atau patut diduganya merupakan hasil tindak pidana korupsi dengan tujuan menyembunyikan atau menyamarkan asal usul harta kekayaan dan atau menyembunyikan atau menyamarkan asal usul sumber, lokasi, peruntukkan, pengalihan hak-hak, atau kepemilikan yang sebenarnya atas harta kekayaan yang diketahuinya atau patut diduganya merupakan hasil tindak pidana korupsi atas nama tersangka TCW (Swasta).

---

**Share :**

Bagikan 0

Tweet



Penyidikan (/id/berkas/penindakan/penyidikan)

Penuntutan (/id/berkas/penindakan/penuntutan)

Inkracht (/id/berkas/penindakan/inkracht)

Jejak Kasus (/id/jejak-kasus)











## LINK

[TENTANG ACCH \(/ID/TENTANG-ACCH\).](#)

[DISCLAIMER \(/ID/DISCLAIMER\).](#)

[KETENTUAN \(/ID/KETENTUAN\).](#)

[SITEMAP \(/ID/SITEMAP\).](#)

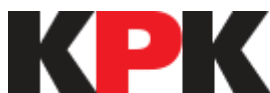

**Komisi Pemberantasan Korupsi**

[\(HTTPS://WWW.KPK.GO.ID/\)](https://www.kpk.go.id/)

## REDAKSI ACCH

KOMISI PEMBERANTASAN KORUPSI  
JL. KUNINGAN PERSADA KAV. 4 JAKARTA 12950  
TELP: (021) 2557 8300 EXT. 8642  
EMAIL: [ACCH@KPK.GO.ID](mailto:ACCH@KPK.GO.ID)  
([MAILTO:ACCH@KPK.GO.ID](mailto:ACCH@KPK.GO.ID)).
