# Supplementary material for: Democratization, leader education and growth: firm-level evidence from Indonesia
Source: Springer Nature journal article supplement (doi:10.1007/s10887-022-09221-5), 2023-02-15
Supplement: MOESM2 [file Penyidikan 2015.pdf › Data/Mayor-level corruption dataset (incl sources)/KPK Penyidikan 2006-/Penyidikan 2015.pdf]

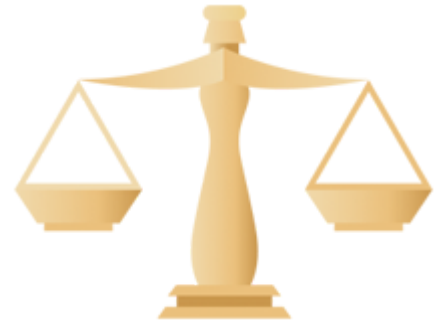

# PENINDAKAN

Menyajikan informasi perkembangan penanganan tindak pidana korupsi yang dilakukan oleh Komisi Pemberantasan Korupsi.

[Beranda \(/id/\)](#) / [Berkas](#) / [PENINDAKAN](#) / [Penyidikan \(/id/berkas/penindakan/penyidikan\)](#) / [Penyidikan 2015](#)

## PENYIDIKAN

### Penyidikan 2015

Ditulis oleh admin.acch. Diposting di [Penyidikan \(/id/berkas/penindakan/penyidikan\)](#). Dilihat: 5429

#### Desember

1. Perkara TPK memberi atau menjanjikan sesuatu kepada pegawai negeri atau penyelenggara negara dengan maksud supaya pegawai negeri atau penyelenggara negara tersebut berbuat atau tidak berbuat sesuatu dalam jabatannya, yang bertentangan dengan jabatannya terkait dengan pengesahan APBD Pemerintah Daerah Provinsi Banten T.A. 2016 atas nama tersangka RICKY TAMPINONGKOL (Swasta).
2. Perkara TPK memberi atau menjanjikan sesuatu kepada pegawai negeri atau penyelenggara negara dengan maksud supaya pegawai negeri atau penyelenggara negara tersebut berbuat atau tidak berbuat sesuatu dalam jabatannya, yang bertentangan dengan jabatannya terkait dengan pengesahan APBD Pemerintah Daerah Provinsi Banten T.A. 2016 atas nama tersangka FL. TRI SATRIYA SANTOSA (Anggota DPRD Prov. Banten).
3. Perkara TPK memberi atau menjanjikan sesuatu kepada pegawai negeri atau penyelenggara negara dengan maksud supaya pegawai negeri atau penyelenggara negara tersebut berbuat atau tidak berbuat sesuatu dalam jabatannya, yang bertentangan dengan jabatannya terkait

dengan pengesahan APBD Pemerintah Daerah Provinsi Banten T.A. 2016 atas nama tersangka H. SRIMULYAHARTONO (Anggota DPRD Prov. Banten).

4. Perkara TPK dalam kegiatan pembangunan Wisma Atlet dan Gedung Serbaguna Pemerintah Provinsi Sumatera Selatan Tahun 2010 – 2011 atas nama tersangka DUDUNG PURWADI (Swasta).
  5. Perkara TPK dengan cara memerintahkan melakukan pengadaan 3 (tiga) unit Quay Container Crane (QCC) di Pelindo II (Persero) tahun 2010 dengan menunjuk langsung Wuxi HuaDong Heavy Machinery Co, Ltd (HDHM) dari China sebagai penyedia barang atas nama tersangka R.J. LINO (Dirut PT. Pelindo II) dkk.
  6. Perkara TPK secara bersama-sama dengan Andi Alfian Mallarangeng selaku Menteri Pemuda dan Olahraga dan kawan-kawan terkait dengan proyek pembangunan/pengadaan/peningkatan sarana dan prasarana olahraga di Hambalang TA 2010-2012 atas nama tersangka ANDI ZULKARNAIN ANWAR alias CHOEL (Swasta).
  7. Perkara TPK secara bersama-sama atau turut serta dalam pengadaan Reagen dan Consumable Penanganan Virus Flu Burung dengan menggunakan dana APBN-P Direktorat Bina Pelayanan Medik Dasar Direktorat Jenderal Bina Pelayanan Medik Depkes RI Tahun Anggaran 2007 atas nama tersangka FREDDY LUMBAN TOBING (Swasta).
- 

## **November**

1. Perkara TPK memberi hadiah atau janji kepada anggota DPRD Provinsi Sumatera Utara periode 2009 s.d. 2014 dan 2014 s.d. 2019 terkait dengan: 1. Persetujuan laporan pertanggungjawaban Pemerintah Provinsi Sumatera Utara tahun anggaran 2012 s.d. 2014 oleh DPRD Provinsi Sumatera Utara; 2. Persetujuan perubahan anggaran pendapatan dan belanja daerah provinsi sumatera utara tahun anggaran 2013 dan 2014 oleh DPRD provinsi sumatera utara; 3. Pengesahan anggaran pendapatan dan belanja daerah provinsi sumatera utara tahun anggaran 2014 dan 2015 oleh DPRD provinsi sumatera utara; dan 4. Penolakan penggunaan hak interpelasi oleh DPRD provinsi sumatera utara pada tahun 2015 atas nama tersangka GATOT PUJO NUGROHO (Gubernur Provinsi Sumatera Utara) dkk.
2. Perkara TPK menerima hadiah atau janji dari Gatot Pujo Nugroho selaku Gubernur Provinsi Sumatera Utara terkait dengan: 1. Persetujuan laporan pertanggungjawaban Pemerintah Provinsi Sumatera Utara tahun anggaran 2012 oleh DPRD Provinsi Sumatera Utara; 2. Persetujuan perubahan anggaran pendapatan dan belanja daerah provinsi sumatera utara tahun anggaran 2013 oleh DPRD provinsi sumatera utara; 3. Pengesahan anggaran pendapatan dan belanja daerah provinsi sumatera utara tahun anggaran 2014 oleh DPRD provinsi sumatera utara; 4. Pengesahan anggaran pendapatan dan belanja daerah provinsi sumatera utara tahun anggaran 2015 oleh DPRD provinsi sumatera utara; 5. Persetujuan laporan pertanggungjawaban Pemerintah Provinsi Sumatera Utara tahun anggaran 2014 oleh DPRD

Provinsi Sumatera Utara; dan 6. Penolakan penggunaan hak interpelasi oleh DPRD provinsi Sumatera Utara pada tahun 2015 atas nama tersangka SALEH BANGUN (Ketua DPRD Provinsi Sumatera Utara).

3. Perkara TPK menerima hadiah atau janji dari Gatot Pujo Nugroho selaku Gubernur Provinsi Sumatera Utara terkait dengan: 1. Persetujuan laporan pertanggungjawaban Pemerintah Provinsi Sumatera Utara tahun anggaran 2012 oleh DPRD Provinsi Sumatera Utara; 2. Persetujuan perubahan anggaran pendapatan dan belanja daerah provinsi Sumatera Utara tahun anggaran 2013 oleh DPRD provinsi Sumatera Utara; 3. Pengesahan anggaran pendapatan dan belanja daerah provinsi Sumatera Utara tahun anggaran 2014 oleh DPRD provinsi Sumatera Utara; 4. Pengesahan anggaran pendapatan dan belanja daerah provinsi Sumatera Utara tahun anggaran 2015 oleh DPRD provinsi Sumatera Utara atas nama tersangka KAMALUDIN HARAHAHAP (Wakil Ketua DPRD Provinsi Sumatera Utara) dkk.
4. Perkara TPK menerima hadiah atau janji dari Gatot Pujo Nugroho selaku Gubernur Provinsi Sumatera Utara terkait dengan: 1. Persetujuan laporan pertanggungjawaban Pemerintah Provinsi Sumatera Utara tahun anggaran 2012 oleh DPRD Provinsi Sumatera Utara; 2. Persetujuan perubahan anggaran pendapatan dan belanja daerah provinsi Sumatera Utara tahun anggaran 2013 oleh DPRD provinsi Sumatera Utara; 3. Pengesahan anggaran pendapatan dan belanja daerah provinsi Sumatera Utara tahun anggaran 2014 oleh DPRD provinsi Sumatera Utara; 4. Pengesahan anggaran pendapatan dan belanja daerah provinsi Sumatera Utara tahun anggaran 2015 oleh DPRD provinsi Sumatera Utara; 5. Persetujuan laporan pertanggungjawaban Pemerintah Provinsi Sumatera Utara tahun anggaran 2014 oleh DPRD Provinsi Sumatera Utara; dan 6. Penolakan penggunaan hak interpelasi oleh DPRD provinsi Sumatera Utara pada tahun 2015 atas nama tersangka CHAIDIR RITCNGA (Wakil Ketua DPRD Provinsi Sumatera Utara) dkk.
5. Perkara TPK menerima hadiah atau janji dari Gatot Pujo Nugroho selaku Gubernur Provinsi Sumatera Utara terkait dengan: 1. Persetujuan laporan pertanggungjawaban Pemerintah Provinsi Sumatera Utara tahun anggaran 2012 oleh DPRD Provinsi Sumatera Utara; 2. Persetujuan perubahan anggaran pendapatan dan belanja daerah provinsi Sumatera Utara tahun anggaran 2013 oleh DPRD provinsi Sumatera Utara; 3. Pengesahan anggaran pendapatan dan belanja daerah provinsi Sumatera Utara tahun anggaran 2014 oleh DPRD provinsi Sumatera Utara; 4. Pengesahan anggaran pendapatan dan belanja daerah provinsi Sumatera Utara tahun anggaran 2015 oleh DPRD provinsi Sumatera Utara atas nama tersangka SIGIT PRAMONO ASRI (Wakil Ketua DPRD Provinsi Sumatera Utara) dkk.
6. Perkara TPK menerima hadiah atau janji dari Gatot Pujo Nugroho selaku Gubernur Provinsi Sumatera Utara terkait dengan: 1. Persetujuan laporan pertanggungjawaban Pemerintah Provinsi Sumatera Utara tahun anggaran 2012 oleh DPRD Provinsi Sumatera Utara; 2. Persetujuan perubahan anggaran pendapatan dan belanja daerah provinsi Sumatera Utara tahun anggaran 2013 oleh DPRD provinsi Sumatera Utara; 3. Pengesahan anggaran pendapatan

dan belanja daerah provinsi sumatera utara tahun anggaran 2014 oleh DPRD provinsi sumatera utara; 4. Pengesahan anggaran pendapatan dan belanja daerah provinsi sumatera utara tahun anggaran 2015 oleh DPRD provinsi sumatera utara; 5. Persetujuan laporan pertanggungjawaban Pemerintah Provinsi Sumatera Utara tahun anggaran 2014 oleh DPRD Provinsi Sumatera Utara; dan 6. Penolakan penggunaan hak interpelasi oleh DPRD provinsi sumatera utara pada tahun 2015 atas nama tersangka AJIB SHAH (Anggota DPRD Provinsi Sumatera Utara periode 2009 s.d. 2014 dan Ketua DPRD Provinsi Sumatera Utara periode 2014 s.d. 2015) dkk.

7. Perkara TPK memberi atau menjanjikan sesuatu kepada pegawai negeri atau penyelenggara negara dengan maksud supaya pegawai negeri atau penyelenggara negara tersebut berbuat atau tidak berbuat sesuatu dalam jabatannya, yang bertentangan dengan kewajibannya terkait dengan pengajuan revisi alih fungsi hutan di provinsi Riau tahun 2014 kepada kementerian kehutanan atas nama tersangka EDISON MARUDUT MARDASAUJI SIAHAAN (swasta).

---

## Oktober

1. Perkara TPK memberi hadiah atau janji kepada Patrice Rio Capella selaku Anggota DPR RI terkait dengan dugaan TPK Dana bantuan Sosial (Bansos), Bantuan Daerah Bawah (BDB), Bantuan Operasional Sekolah (BOS), Tunggakan Dana Bagi Hasil (DBH), dan penyertaan modal pada sejumlah BUMD pada Pemerintah Provinsi Sumatera Utara yang sedang dilakukan penyelidikan oleh Kejaksaan Tinggi Sumatera Utara dan atau Kejaksaan Agung RI atas nama tersangka GATOT PUJO NUGROHO (Gubernur Sumut) dan EVY SUSANTI (Swasta).
2. Perkara TPK menerima hadiah atau janji dari Gatot Pujo Nugroho selaku Gubernur Sumut dan Evy Susanti terkait dugaan TPK Dana bantuan Sosial (Bansos), Bantuan Daerah Bawah (BDB), Bantuan Operasional Sekolah (BOS), Tunggakan Dana Bagi Hasil (DBH), dan penyertaan modal pada sejumlah BUMD pada Pemerintah Provinsi Sumatera Utara yang sedang dilakukan penyelidikan oleh Kejaksaan Tinggi Sumatera Utara dan atau Kejaksaan Agung RI atas nama tersangka PATRICE RIO CAPELLA (Anggota DPR RI).
3. Perkara TPK dalam pengadaan dan pelaksanaan Pembangunan Balai Pendidikan dan Pelatihan Ilmu Pelayaran (BP2IP) Sorong Tahap III pada Pusat Pengembangan SDM Perhubungan Laut (PPSDML) Badan Pengembangan SDM Kementerian Perhubungan Tahun Anggaran 2011 atas nama tersangka BOBBY REYNOLD MAMAHIT (Kepala Badan Pengembangan SDM Perhubungan (BPSDM)).
4. Perkara TPK dalam pengadaan dan pelaksanaan Pembangunan Balai Pendidikan dan Pelatihan Ilmu Pelayaran (BP2IP) Sorong Tahap III pada Pusat Pengembangan SDM Perhubungan Laut (PPSDML) Badan Pengembangan SDM Kementerian Perhubungan Tahun Anggaran 2011 atas nama tersangka DJOKO PRAMONO (Kepala Badan Pengembangan SDM Perhubungan Laut (BPSDML)).

5. Perkara TPK secara bersama-sama atau turut serta terkait perbuatan Ikmal Jaya selaku Walikota Tegal periode 2009 s.d. 2014 dalam pelaksanaan tukar guling tanah antara Pemerintah Kota Tegal dengan pihak Swasta pada tahun 2012 atas nama tersangka RUDYANTO (Swasta).
  6. Perkara TPK memberi hadiah atau janji kepada Dewi Aryaliniza Als Dewie Yasin Limpo selaku anggota DPR RI bersama-sama dengan Bambang Wahyuhadi dan Rinelda Bandaso terkait usulan penganggaran Proyek Pembangunan Infrastruktur Energi Baru dan Terbarukan TA 2016 untuk Kabupaten Deiyai Propinsi Papua atas nama tersangka SETIADY JUSUF (Swasta) dan IRENIUS ADII (Kepala Dinas ESDM Kab. Deiyai Papua).
  7. Perkara TPK bersama-sama dengan Rinelda Bandaso, yaitu menerima hadiah atau janji terkait usulan penganggaran Proyek Pembangunan Infrastruktur Energi Baru dan Terbarukan TA 2016 untuk Kabupaten Deiyai Propinsi Papua atas nama tersangka DEWIE LIMPO (Anggota DPR RI) dan BAMBANG WAHYUHADI (Staf Ahli anggota DPR RI).
  8. Perkara TPK bersama-sama dengan Dewi Aryaliniza Als Dewie Yasin Limpo selaku anggota DPR RI dan Bambang Wahyuhadi, yaitu menerima hadiah atau janji terkait usulan penganggaran Proyek Pembangunan Infrastruktur Energi Baru dan Terbarukan TA 2016 untuk Kabupaten Deiyai Propinsi Papua atas nama tersangka RINELDA BANDASO (Swasta).
- 

## **September**

1. Perkara TPK pemberian sesuatu atau uang bersama-sama dengan Willy Sebastian Lim kepada Suroso Atmomartoyo dalam proyek pengadaan Tethra Ethyl Lead (TEL) di PT. Pertamina (Persero) tahun 2004 – 2005 atas nama tersangka MUHAMMAD SYAKIR (Swasta).
- 

## **Agustus**

1. Perkara TPK pemberian hadiah atau janji kepada Anggota Dewan Perwakilan Rakyat Daerah (DPRD) Kabupaten Musi Banyuasin yang terkait dengan persetujuan Laporan Keterangan Pertanggungjawaban (LKPJ) Kepala Daerah Musi Banyuasin Tahun Anggaran 2014 dan pengesahan Anggaran Pendapatan dan Belanja Daerah (APBD) Kabupaten Musi Banyuasin Tahun Anggaran 2015 atas nama tersangka PAHRI AZHARI (Bupati Kab. Musi Banyuasin) dan LUCIANTY (Anggota DPRD Prov. Sumsel).
2. TPK menerima hadiah atau janji terkait dengan persetujuan Laporan Keterangan Pertanggungjawaban (LKPJ) Kepala Daerah Musi Banyuasin Tahun Anggaran 2014 dan pengesahan Anggaran Pendapatan dan Belanja Daerah (APBD) Kabupaten Musi Banyuasin Tahun Anggaran 2015 atas nama tersangka RIAMON ISKANDAR (Ketua DPRD Kab. Musi Banyuasin), DARWIN (Wakil Ketua DPRD Kab. Musi Banyuasin), ISLAN HANURA (Wakil Ketua DPRD Kab. Musi Banyuasin), dan AIDIL FITRI (Wakil Ketua DPRD Kab. Musi Banyuasin).

1. Perkara TPK sehubungan dengan memberi atau menjanjikan sesuatu berupa uang kepada Majelis Hakim dan Panitera Pengadilan Tata Usaha Negara (PTUN) Medan Sumatera Utara terkait permohonan pengujian kewenangan Kejaksaan Tinggi Sumatera Utara sesuai dengan Undang-Undang Nomor 30 Tahun 2014 tentang Administrasi Pemerintahan atas Penyelidikan tentang dugaan terjadinya Tindak Pidana Korupsi Dana Bantuan Sosial (BANSOS), Bantuan Daerah Bawahan (BDB), Bantuan Operasional Sekolah (BOS) dan Penahanan Pencairan Dana Bagi Hasil (DBH) atas nama tersangka MOH. YAGARI BHASTARA GUNTUR (Pengacara).
2. Perkara TPK sehubungan dengan menerima pemberian atau janji terkait dengan penanganan perkara permohonan pengujian kewenangan Kejaksaan Tinggi Sumatera Utara sesuai dengan Undang-Undang Nomor 30 Tahun 2014 tentang Administrasi Pemerintahan atas Penyelidikan tentang dugaan terjadinya Tindak Pidana Korupsi Dana Bantuan Sosial (BANSOS), Bantuan Daerah Bawahan (BDB), Bantuan Operasional Sekolah (BOS) dan Penahanan Pencairan Dana Bagi Hasil (DBH) atas nama tersangka TRIPENI IRIANTO PUTRO (Ketua Majelis Hakim Pengadilan Tata Usaha Negara (PTUN) Medan dan sekaligus Ketua PTUN Medan).
3. Perkara TPK sehubungan dengan menerima pemberian atau janji terkait dengan penanganan perkara permohonan pengujian kewenangan Kejaksaan Tinggi Sumatera Utara sesuai dengan Undang-Undang Nomor 30 Tahun 2014 tentang Administrasi Pemerintahan atas Penyelidikan tentang dugaan terjadinya Tindak Pidana Korupsi Dana Bantuan Sosial (BANSOS), Bantuan Daerah Bawahan (BDB), Bantuan Operasional Sekolah (BOS) dan Penahanan Pencairan Dana Bagi Hasil (DBH) Atas nama tersangka DERMAWAN GINTING (Anggota Majelis Hakim Pengadilan Tata Usaha Negara (PTUN) Medan).
4. Perkara TPK sehubungan dengan menerima pemberian atau janji terkait dengan penanganan perkara permohonan pengujian kewenangan Kejaksaan Tinggi Sumatera Utara sesuai dengan Undang-Undang Nomor 30 Tahun 2014 tentang Administrasi Pemerintahan atas Penyelidikan tentang dugaan terjadinya Tindak Pidana Korupsi Dana Bantuan Sosial (BANSOS), Bantuan Daerah Bawahan (BDB), Bantuan Operasional Sekolah (BOS) dan Penahanan Pencairan Dana Bagi Hasil (DBH) Atas nama tersangka AMIR FAUZI (Anggota Majelis Hakim Pengadilan Tata Usaha Negara (PTUN) Medan).
5. Perkara TPK sehubungan dengan menerima pemberian atau janji terkait dengan penanganan perkara permohonan pengujian kewenangan Kejaksaan Tinggi Sumatera Utara sesuai dengan Undang-Undang Nomor 30 Tahun 2014 tentang Administrasi Pemerintahan atas Penyelidikan tentang dugaan terjadinya Tindak Pidana Korupsi Dana Bantuan Sosial (BANSOS), Bantuan Daerah Bawahan (BDB), Bantuan Operasional Sekolah (BOS) dan Penahanan Pencairan Dana Bagi Hasil (DBH), dan Perkara TPK sehubungan dengan bersama-sama memberi atau menjanjikan sesuatu berupa uang kepada Majelis Hakim dan Panitera Pengadilan Tata Usaha Negara (PTUN) Medan Sumatera Utara terkait permohonan pengujian kewenangan Kejaksaan

Tinggi Sumatera Utara sesuai dengan Undang-Undang Nomor 30 Tahun 2014 tentang Administrasi Pemerintahan atas Penyelidikan tentang dugaan terjadinya Tindak Pidana Korupsi Dana Bantuan Sosial (BANSOS), Bantuan Daerah Bawahan (BDB), Bantuan Operasional Sekolah (BOS) dan Penahanan Pencairan Dana Bagi Hasil (DBH) atas nama tersangka SYAMSIR YUSFAN (Panitera pada Pengadilan Tata Usaha Negara (PTUN) Medan).

6. Perkara TPK sehubungan dengan bersama-sama atau turut serta memberi atau menjanjikan sesuatu berupa uang kepada Majelis Hakim dan Panitera Pengadilan Tata Usaha Negara (PTUN) Medan Sumatera Utara yang diduga dilakukan oleh tersangka OTTO CORNELIS KALIGIS (Pengacara).
7. Perkara TPPU sehubungan dengan perbuatan menempatkan, mentransfer, mengubah bentuk, dan atau menyembunyikan/menyamarkan asal usul, sumber, lokasi, kepemilikan dan atau perbuatan menerima atau menguasai penempatan, pentransferan, pembayaran atau menggunakan harta kekayaan yang diketahui atau patut diduga merupakan hasil tindak pidana yang dilakukan oleh tersangka MUHAMMAD NAZARUDDIN (Mantan anggota DPR RI).
8. Perkara TPK sehubungan dengan bersama-sama atau turut serta memberi atau menjanjikan sesuatu berupa uang kepada Majelis Hakim dan Panitera Pengadilan Tata Usaha Negara (PTUN) Medan Sumatera Utara terkait permohonan pengujian kewenangan Kejaksaan Tinggi Sumatera Utara sesuai dengan Undang-Undang Nomor 30 Tahun 2014 tentang Administrasi Pemerintahan atas Penyelidikan tentang dugaan terjadinya Tindak Pidana Korupsi Dana Bantuan Sosial (BANSOS), Bantuan Daerah Bawahan (BDB), Bantuan Operasional Sekolah (BOS) dan Penahanan Pencairan Dana Bagi Hasil (DBH) atas nama tersangka GATOT PUJO NUGROHO (Gubernur Sumatera Utara) dan EVY SUSANTI (Swasta).
9. Perkara TPK sehubungan dengan Pembangunan Dermaga Bongkar Lanjutan, Sabang yang dibiayai Anggaran Pendapatan dan Belanja Negara (APBN) Tahun Anggaran 2011 atas nama tersangka RUSLAN ABD. GANI (Kepala Badan Pengusahaan Kawasan Perdagangan Bebas Dan Pelabuhan Bebas Sabang (BPKS) Tahun 2011).

---

## Juni

1. Perkara TPK sehubungan dengan penggunaan DOM (Dana Operasional Menteri) pada Kementerian Agama RI tahun 2011 13 2014 atas nama tersangka SURYADHARMA ALI (Menteri Agama Republik Indonesia).
2. Perkara TPK sehubungan dengan pelaksanaan Kerjasama Rehabilitasi, Kelola dan Transfer untuk Instalasi Pengolahan Air antara PDAM Kota Makassar dengan Pihak Swasta periode Tahun 2005 13 2013 atas nama tersangka ILHAM ARIEF SIRADJUDDIN (Walikota Makassar periode tahun 2004 13 2009 dan periode tahun 2009 13 2014).
3. Perkara TPK sehubungan dengan pelaksanaan Kerjasama Rehabilitasi, Kelola dan Transfer untuk Instalasi Pengolahan Air antara PDAM Kota Makassar dengan pihak swasta periode

tahun 2006 13 2011 atas nama tersangka HENGKY WIDJAJA (Swasta).

4. Perkara TPK sehubungan dengan pemberian hadiah atau janji kepada Anggota Dewan Perwakilan Rakyat Daerah (DPRD) Kabupaten Musi Banyuasin yang terkait dengan persetujuan Laporan Keterangan Pertanggungjawaban (LKPJ) Kepala Daerah Musi Banyuasin Tahun Anggaran 2014 dan pengesahan Anggaran Pendapatan dan Belanja Daerah (APBD) Kabupaten Musi Banyuasin Tahun Anggaran 2015 atas nama tersangka SYAMSUDDIN FEI (Kepala Dinas Pendapatan Pengelolaan Keuangan Aset Daerah (DPPKAD) Kabupaten Musi Banyuasin) dan FAISYAR (Kepala Badan Perencanaan Pembangunan Daerah (Bappeda) Kabupaten Musi Banyuasin).
5. Perkara TPK sehubungan dengan menerima hadiah atau janji terkait dengan persetujuan Laporan Keterangan Pertanggungjawaban (LKPJ) Kepala Daerah Musi Banyuasin Tahun Anggaran 2014 dan pengesahan Anggaran Pendapatan dan Belanja Daerah (APBD) Kabupaten Musi Banyuasin Tahun Anggaran 2015 atas nama tersangka BAMBANG KARIYANTO (Anggota Dewan Perwakilan Rakyat Daerah (DPRD) Kabupaten Musi Banyuasin periode 2014 13 2019) dan ADAM MUNANDAR (Anggota Dewan Perwakilan Rakyat Daerah (DPRD) Kabupaten Musi Banyuasin periode 2014 13 2019).
6. Perkara TPK sehubungan dengan memberi atau menjanjikan sesuatu kepada hakim dengan maksud untuk mempengaruhi putusan perkara yang diserahkan kepadanya untuk diadili terkait dengan sengketa pemilihan kepala daerah Kabupaten Empat Lawang di Mahkamah Konstitusi tahun 2013 dan dengan sengaja tidak memberikan keterangan atau memberikan keterangan yang tidak benar pada waktu persidangan atas nama terdakwa M. Akil Mochtar di pengadilan TPK Jakarta atas nama tersangka BUDI ANTONI ALJUFRI (Bupati Empat Lawang) dan SUZANA BUDI ANTONI (Swasta).
7. Perkara TPK sehubungan dengan memberi atau menjanjikan sesuatu kepada hakim dengan maksud untuk mempengaruhi putusan perkara yang diserahkan kepadanya untuk diadili terkait dengan sengketa pemilihan kepala daerah Kabupaten Pulau Morotai di Mahkamah Konstitusi tahun 2011 atas nama tersangka RUSLI SIBUA (Bupati Pulau Morotai).

---

## Mei

1. -

---

## April

1. Perkara TPK sehubungan dengan penerimaan hadiah terkait dengan kegiatan usaha PT. Mitra Maju Sukses dan/atau Group di Wilayah Kabupaten Tanah Laut Provinsi Kalimantan Selatan



yang dilakukan oleh tersangka ADRIANSYAH.

2. Perkara TPK sehubungan dengan pemberian hadiah terkait dengan kegiatan usaha PT. Mitra Maju Sukses dan/atau Group di Wilayah Kabupaten Tanah Laut Provinsi Kalimantan Selatan yang dilakukan oleh tersangka ANDREW HIDAYAT.
- 

## **Maret**

1. Perkara TPK sehubungan dengan kegiatan Detail Engineering Design (DED) PLTA Danau Sentani dan Danau Paniani Tahun Anggaran 2008 di Provinsi Papua yang dilakukan oleh tersangka BARNABAS SUEBU (Gubernur Papua).
  2. Perkara TPK sehubungan dengan kegiatan Detail Engineering Design (DED) PLTA Danau Sentani dan Danau Paniani Tahun Anggaran 2008 di Provinsi Papua yang dilakukan oleh tersangka LA MUSI DIDI (Swasta).
- 

## **Februari**

1. Perkara TPK sehubungan dengan memberi atau menjanjikan sesuatu kepada pegawai negeri atau penyelenggara negara terkait permintaan izin Operasional PT. Indokliring Internasional yang dikeluarkan Badan Pengawas Perdagangan Berjangka Komoditi (Bappebti) yang dilakukan oleh tersangka HASSAN WIDJAJA (Swasta).
  2. Perkara TPK sehubungan dengan memberi atau menjanjikan sesuatu kepada pegawai negeri atau penyelenggara negara terkait permintaan izin Operasional PT. Indokliring Internasional yang dikeluarkan Badan Pengawas Perdagangan Berjangka Komoditi (Bappebti) yang dilakukan oleh tersangka MOCH BIHAR SAKTI WIBOWO (Swasta).
  3. Perkara TPK sehubungan dengan memberi atau menjanjikan sesuatu kepada pegawai negeri atau penyelenggara negara terkait permintaan izin Operasional PT. Indokliring Internasional yang dikeluarkan Badan Pengawas Perdagangan Berjangka Komoditi (Bappebti) yang dilakukan oleh tersangka SHERMAN RANA KRISNA (Swasta).
- 

## **Januari**

1. Perkara TPK dalam pelaksanaan pengadaan peralatan medik dari sisa dana pelayanan kesehatan bagi penduduk miskin dalam rangka wabah flu burung (Avian Influenza) pada Dirjen Bina Pelayanan Medik Departemen Kesehatan dan dalam pelaksanaan pengadaan peralatan kesehatan penanganan wabah flu burung (Avian Influenza) dana APBN-P Sekretariat Dirjen Bina Pelayanan Medik Depkes TA 2006 atas nama tersangka MULYA A HASJMY (Sesditjen Bina Pelayanan Medik Depkes RI Tahun 2006) dkk.

2. Perkara TPK dalam pengadaan dan pemasangan Pembangkit Listrik Tenaga Surya (PLTS) berupa Solar Home System (SHS) dan Pembangkit Listrik Tenaga Mikro Hidro (PLTMH) pada Direktorat Jenderal Listrik dan Pemanfaatan Energi Departemen Energi dan Sumber Daya Mineral (LPE ESDM) tahun anggaran 2009 atas nama tersangka JACOB PURWONO (Dirjen LPE Departemen ESDM).
3. Perkara TPK penerimaan hadiah atau pemberian berupa uang kepada pemeriksa Badan Pemeriksa Keuangan Sulawesi Utara pada tahun 2008 atas laporan keuangan Pemerintah Kota Tomohon TA.2007 atas nama tersangka JEFFERSON SM RUMAJAR (Walikota Tomohon Periode Tahun 2005 - 2010).
4. Perkara TPK penerimaan sesuatu atau uang yang didua diberikan oleh Direktur PT. Sugih Interjaya dkk terkait dengan proyek pengadaan Tethra Ethyl Lead (TEL) di PT. Pertamina (Persero) tahun 2004 – 2005 atas nama tersangka SUROSO ATMO MARTOYO (Mantan Direktur Pengolahan PT. Pertamina).
5. Perkara TPK memberikan sesuatu atau uang kepada Direktur Pengolahan PT. Pertamina Persero dan pihak lainnya terkait dengan proyek Pengadaan Tethra Ethyl Lead (TEL) di PT. Pertamina (Persero) tahun 2004-2005 atas nama tersangka WILLY SEBASTIAN LIM (Swasta).
6. Perkara TPPU terkait dengan TPK sehubungan dengan transaksi pembelian saham PT. Garuda di Mandiri Sekuritas oleh PT. Permai Raya Wisata, PT. Cakrawala Abadi, PT. Exartech Teknologi Utama, PT. Pasific Putra Metropolitan, PT. Darmakusumah dan transaksi lainnya atas nama tersangka MUH. NAZARUDDIN (Swasta).
7. Perkara TPK dalam pengadaan Driving Simulator Roda Dua (R2) dan Roda Empat (R4) pada Korps Lalu Lintas Mabes Polri TA 2011 atas nama tersangka SUKOTJO S BAMBANG (Swasta).
8. Perkara TPK penggunaan dana kas daerah Pemerintah kota Tomohon TA 2009 dan 2010 atas nama tersangka JEFFERSON SM RUMAJAR (Walikota Tomohon Periode Tahun 2005 - 2010).
9. Perkara TPK pengadaan alat kesehatan Kedokteran Umum Puskesmas Kota Tangerang Selatan APBDP Tahun Anggaran 2012 atas nama tersangka TUBAGUS CHAERI WARDANA CHASAN alias TB. CHAERI WARDANA (Swasta).
10. Perkara TPK pengadaan alat kesehatan Kedokteran Umum Puskesmas Kota Tangerang Selatan APBDP Tahun Anggaran 2012 atas nama tersangka DADANG PRIJATNA (Swasta).
11. Perkara TPK yaitu pegawai negeri atau penyelenggara negara yang dengan maksud menguntungkan diri sendiri atau orang lain secara melawan hukum, atau dengan menyalahgunakan kekuasaannya memaksa seseorang memberikan sesuatu, membayar, dan atau menerima pembayaran dengan potongan, atau untuk mengerjakan sesuatu bagi dirinya sendiri; atau pegawai negeri atau penyelenggara negara yang menerima hadiah atau janji padahal diketahui atau patut diduga, bahwa hadiah atau janji tersebut diberikan untuk menggerakkan agar melakukan sesuatu atau disebabkan karena telah melakukan atau tidak melakukan sesuatu yang bertentangan dengan kewajibannya atau diberikan karena kekuasaan

atau kewenangan yang berhubungan dengan jabatannya atas nama tersangka RATU ATUT CHOSIYAH (Gubernur Banten).

12. Perkara TPK pengadaan sarana dan prasarana alat kesehatan dan pengadaan lainnya di lingkungan Pemerintah Provinsi Banten Tahun 2011 – 2013 atas nama tersangka RATU ATUT CHOSIYAH (Gubernur Banten).
13. Perkara TPK pengadaan sarana dan prasarana alat kesehatan dan pengadaan lainnya di lingkungan Pemerintah Provinsi Banten Tahun 2011 – 2013 atas nama tersangka TUBAGUS CHAERI WARDANA CHASAN (Swasta).
14. Perkara TPK menerima hadiah atau janji terkait kegiatan pada Kementerian Energi dan Sumber Daya Mineral dan kegiatan lainnya atas nama tersangka WARYONO KARNO (Sekretaris Jenderal Kementerian Energi dan Sumber Daya Mineral).
15. Perkara TPPU sehubungan dengan dengan perbuatan menempatkan, mentransfer, mengalihkan, membelanjakan, membayarkan, menghibahkan, menitipkan, membawa ke luar negeri, mengubah bentuk, menukarkan dengan mata uang atau surat berharga atau perbuatan lain atas harta kekayaan yang diketahui atau patut diduga merupakan hasil tindak pidana korupsi dengan tujuan menyembunyikan atau menyamarkan asal usul harta kekayaan dan atau menyembunyikan atau menyamarkan asal usul sumber, lokasi, peruntukkan, pengalihan hak-hak, atau kepemilikan yang sebenarnya atas harta kekayaan yang diketahuinya atau patut diduga merupakan hasil tindak pidana korupsi atas nama tersangka TUBAGUS CHAERI WARDANA (Swasta).
16. Perkara TPK sehubungan dengan pelaksanaan proyek pembangunan dermaga bongkar pada kawasan perdagangan bebas dan pelabuhan bebas Sabang yang dibiayai Anggaran Pendapatan dan Belanja Negara (APBN) TA 2006 – 2010 atas nama tersangka T. SYAIFUL ACHMAD (Kepala Badan Pengelolaan Kawasan Sabang TA 2006-2010).
17. Perkara TPK sehubungan dengan orang yang melakukan pembantuan terkait tindak pidana korupsi dalam pengadaan alat kesehatan untuk kebutuhan antisipasi Kejadian Luar Biasa (KLB) masalah kesehatan akibat bencana di Pusat Penanggulangan masalah Kesehatan pada Departemen Kesehatan Tahun Anggaran 2005 yang dilakukan oleh Mulya Hasjmy atas nama tersangka SITI FADILLAH SUPARI (Mantan Menteri Kesehatan RI periode Tahun 2004 – 2009).
18. Perkara TPK sehubungan dengan pelaksanaan tukar guling tanah antara Pemerintah Kota Tegal dengan pihak Swasta pada tahun 2012 atas nama tersangka IKMAL JAYA (Walikota Tegal).
19. Perkara TPK sehubungan dengan pelaksanaan tukar guling tanah antara Pemerintah Kota Tegal dengan pihak Swasta pada tahun 2012 atas nama tersangka SYAEFUL JAMIL (Swasta).
20. Perkara TPK sehubungan dengan pengadaan paket penerapan Kartu Tanda Penduduk Berbasis Nomor Induk Kependudukan Secara Nasional (KTP Elektronik) tahun 2011 s.d. 2012 pada Kementerian Dalam Negeri RI atas nama tersangka SUGIHARTO (PPK Direktorat Jenderal Kependudukan dan Catatan Sipil Kementerian Dalam Negeri RI).

21. Perkara TPK sehubungan dengan perbuatan melawan hukum atau penyalahgunaan wewenang dalam menerima seluruh permohonan keberatan wajib pajak atas SKPN PPh Badan PT. BCA, Tbk. Tahun pajak 1999 atas nama tersangka HADI POERNOMO (Dirjen Pajak Kementerian Keuangan RI Periode Tahun 2002-2004).
22. Perkara TPK sehubungan dengan kegiatan Sosialisasi Sektor Energi dan Sumber Daya Mineral Bahan Bakar Bersubsidi; Kegiatan Sepeda Sehat Dalam Rangka Sosialisasi Hemat Energi; dan Perawatan Gedung Kantor Sekretariat Jenderal di Kementerian Energi dan Sumber Daya Mineral TA 2012 atas nama tersangka WARYONO KARNO (Sekretaris Jenderal Kementerian Energi dan Sumber Daya Mineral).
23. Perkara TPK sehubungan dengan Pelaksanaan Kerjasama Rehabilitasi, Kelola dan Transfer untuk Instalasi Pengolahan Air antara PDAM Kota Makassar dengan pihak swasta periode tahun 2006 – 2011 atas nama tersangka ILHAM ARIEF SIRADJUDDIN (Walikota Makassar).
24. Perkara TPK sehubungan dengan Pelaksanaan Kerjasama Rehabilitasi, Kelola dan Transfer untuk Instalasi Pengolahan Air antara PDAM Kota Makassar dengan pihak swasta periode tahun 2006 – 2011 atas nama tersangka HENGKY WIDJAJA (Swasta).
25. Perkara TPK sehubungan dengan menerima hadiah atau janji terkait penerapan Anggaran Pendapatan dan Belanja Negara Perubahan (APBN-P) TA 2013 Kementerian Energi dan Sumber Daya Mineral (ESDM) oleh Komisi VII DPR RI dan kegiatan lainnya atas nama tersangka SUTAN BHATOEKANA (Ketua Komisi VII DPR RI periode Tahun 2009 s.d. 2014).
26. Perkara TPK sehubungan dengan Penyelenggaraan Ibadah Haji tahun 2012 – 2013 atas nama tersangka SURYADHARMA ALI (Menteri Agama RI).
27. Perkara TPK sehubungan dengan kegiatan Detail Engineering Design (DED) PLTA sungai Memberamo dan sungai Urumuka tahun 2009 dan 2010 di Provinsi Papua atas nama tersangka LAMUSI DIDI (Swasta).
28. Perkara TPK sehubungan dengan kegiatan Detail Engineering Design (DED) PLTA sungai Memberamo dan sungai Urumuka tahun 2009 dan 2010 di Provinsi Papua atas nama tersangka BARNABAS SUEBU (Gubernur Papua periode tahun 2006 s.d. 2011).
29. Perkara TPK sehubungan dengan turut serta dan bersama-sama dengan Barnabas Suebu dalam kegiatan Detail Engineering Design (DED) PLTA sungai Memberamo dan sungai Urumuka tahun 2009 dan 2010 di Provinsi Papua atas nama tersangka JANNES JOHAN KARUBABA (Kepala Dinas Pertambangan dan Energi Provinsi Papua periode tahun 2008 s.d. 2011).
30. Perkara TPK sehubungan dengan memberi atau menjanjikan sesuatu kepada M. Akil Mochtar selaku Hakim Mahkamah Konstitusi dengan maksud untuk mempengaruhi putusan perkara sengketa Pemilihan Kepala Daerah (Pilkada) Kabupaten Tapanuli Tengah Tahun 2011 yang diserahkan kepadanya untuk diadili atas nama tersangka RAJA BONARAN SITUMEANG (Bupati Tapanuli Tengah periode tahun 2011 – 2016).
31. Perkara TPK sehubungan dengan Kegiatan Pembangunan Wisma Atlet dan Gedung Serbaguna Pemerintah Provinsi Sumatera Selatan Tahun 2010-2011 atas nama tersangka RIZAL

ABDULLAH (Ketua Komite Pembangunan Wisma Atlet Sumatera Selatan/ Kepala Dinas Pekerjaan Umum Sumatera Selatan).

32. Perkara TPK sehubungan dengan Pengadaan dan Pelaksanaan Proyek Pembangunan Diklat Pelayaran Sorong Tahap III pada Pusat Pengembangan Sumber Daya Manusia Perhubungan Laut, Badan Pengembangan Sumber Daya Manusia Perhubungan, Kementerian Perhubungan Republik Indonesia TA 2011 atas nama tersangka BUDI RACHMAT KURNIAWAN (Swasta).
33. Perkara TPK sehubungan dengan Pengadaan dan Pelaksanaan Proyek Pembangunan Diklat Pelayaran Sorong Tahap III pada Pusat Pengembangan Sumber Daya Manusia Perhubungan Laut, Badan Pengembangan Sumber Daya Manusia Perhubungan, Kementerian Perhubungan Republik Indonesia TA 2011 atas nama tersangka SUGIARTO (Pejabat Pembuat Komitmen Satuan Kerja Pusat Pengembangan Sumber Daya Manusia Perhubungan Laut, Badan Pengembangan Sumber Daya Manusia Perhubungan).
34. Perkara TPK sehubungan dengan Pengadaan dan Pelaksanaan Proyek Pembangunan Diklat Pelayaran Sorong Tahap III pada Pusat Pengembangan Sumber Daya Manusia Perhubungan Laut, Badan Pengembangan Sumber Daya Manusia Perhubungan, Kementerian Perhubungan Republik Indonesia TA 2011 atas nama tersangka IRAWAN (Ketua Panitia Pengadaan Barang dan Jasa Satuan Kerja Pusat Pengembangan Sumber Daya Manusia Perhubungan Laut, Badan Pengembangan Sumber Daya Manusia Perhubungan).
35. Perkara TPK sehubungan dengan menguntungkan diri sendiri atau orang lain secara melawan hukum atau menyalahgunakan kekuasaannya memaksa seseorang memberikan sesuatu, membayar, atau untuk mengerjakan sesuatu bagi dirinya sendiri, pada tahun 2011 s/d 2013, di Kementerian Energi dan Sumber Daya Mineral atas nama tersangka JERO WACIK (Menteri ESDM).
36. Perkara TPK sehubungan dengan bersama-sama melakukan atau turut serta melakukan terkait perbuatan Lusita Anie Razak, yaitu : memberi atau menjanjikan sesuatu kepada pegawai negeri atau penyelenggara negara dengan maksud supaya pegawai negeri atau penyelenggara negara tersebut berbuat atau tidak berbuat sesuatu dalam jabatannya yang bertentangan dengan kewajibannya atau memberi sesuatu kepada pegawai negeri atau penyelenggara negara karena atau berhubungan dengan sesuatu yang bertentangan dengan kewajiban dilakukan atau tidak dilakukan dalam jabatannya terkait dengan pengurusan perkara tindak pidana menempatkan keterangan palsu di atas bukti autentik dan pemalsuan atas sertifikat tanah dengan terlapor Sugiharta Alias Along atas nama tersangka BAMBANG WIRATMADJI SOEHARTO (Swasta).
37. Perkara TPK sehubungan dengan memberi atau menjanjikan sesuatu kepada hakim dengan maksud untuk mempengaruhi putusan perkara yang diserahkan kepadanya untuk diadili berkaitan dengan penanganan perkara sengketa Pemilihan Kepala Daerah (Pilkada) Kabupaten Lebak, Propinsi Banten Tahun 2013 di Mahkamah Konstitusi Republik Indonesia atau memberi hadiah atau janji kepada pegawai negeri dengan mengingat kekuasaan atau wewenang yang melekat pada jabatan atau kedudukannya, atau oleh pemberi hadiah atau janji dianggap

melekat pada jabatan atau kedudukan tersebut atas nama tersangka AMIR HAMZAH (Wakil Bupati Lebak) dan KASMIN (Anggota DPRD TK I Banten).

38. Perkara TPK sehubungan dengan Pegawai Negeri atau Penyelenggara Negara yang Menerima Pemberian atau Janji dengan maksud supaya pegawai negeri atau penyelenggara negara tersebut berbuat atau tidak berbuat sesuatu dalam jabatannya, yang bertentangan dengan kewajibannya terkait dengan Pengajuan Revisi Alih Fungsi Hutan di Provinsi Riau Tahun 2014 kepada Kementrian Kehutanan atas nama tersangka ANNAS MAAMUN (Gubernur Riau).
39. Perkara TPK sehubungan dengan bersama-sama atau turut serta F.X. Yohan Yap Als Yohan dalam memberi atau menjanjikan sesuatu kepada Pegawai Negeri atau Penyelenggara Negara terkait pemberian Rekomendasi Tukar Menukar Kawasan Hutan di Kabupaten Bogor atas nama PT. Bukit Jonggol Asri dan dengan sengaja mencegah, merintangi, atau menggagalkan secara langsung atau tidak langsung penyidikan, penuntutan, dan pemeriksaan di sidang pengadilan terhadap tersangka dan terdakwa ataupun para saksi dalam perkara korupsi atas nama tersangka KWEE CAHYADI KUMALA ALS SWIE TENG (Swasta).
40. Perkara TPK sehubungan dengan Penyalahgunaan kewenangan dalam menggunakan Dana Pendidikan Luar Sekolah pada Sub Dinas PLS Dinas Pendidikan dan Kebudayaan Provinsi Nusa Tenggara Timur Tahun Anggaran 2007 atas nama tersangka JOHN MANULANGGA (Kadis P dan K Provinsi NTT/KPA).
41. Perkara TPK sehubungan dengan Penyalahgunaan kewenangan dalam menggunakan Dana Pendidikan Luar Sekolah pada Sub Dinas PLS Dinas Pendidikan dan Kebudayaan Provinsi Nusa Tenggara Timur Tahun Anggaran 2007 atas nama tersangka MARTHEN DIRA TOME (Kasubdin PLS Provinsi NTT/ PPK).
42. Perkara TPK sehubungan dengan menerima pemberian atau janji dalam kegiatan pengadaan alat kesehatan I untuk kebutuhan Pusat Penanggulangan Krisis Departemen Kesehatan dari dana DIPA revisi APBN Pusat Penanggulangan Krisis Sekretariat Jenderal Departemen Kesehatan Tahun Anggaran 2007 atas nama tersangka SITI FADILAH SUPARI (Menteri Kesehatan Republik Indonesia Periode tahun 2004 - 2009).
43. Perkara TPK sehubungan dengan Pengadaan Alat Kesehatan Rumah Sakit Khusus Pendidikan Penyakit Infeksi dan Pariwisata Universitas Udayana pada Tahun Anggaran 2009 atas nama tersangka MADE MEREGAWA (PPK).
44. Dugaan TPK sehubungan dengan Pengadaan Alat Kesehatan Rumah Sakit Khusus Pendidikan Penyakit Infeksi dan Pariwisata Universitas Udayana pada Tahun Anggaran 2009 atas nama tersangka MARISI MATONDANG (Swasta).
45. Perkara TPK sehubungan dengan menerima hadiah atau janji terkait dengan jual beli gas alam untuk pembangkit listrik di Gresik dan Gili Timur Bangkalan Madura, Jawa Timur dan Proyek-proyek lainnya atas nama tersangka H. FUAD AMIN (Ketua DPRD Kab. Bangkalan) dkk.
46. Perkara TPK sehubungan dengan memberi hadiah atau janji terkait dengan jual beli gas alam untuk pembangkit listrik di Gresik dan Gili Timur Bangkalan Madura, Jawa Timur dan Proyek-

proyek lainnya atas nama tersangka IR. A. BAMBANG D. (Swasta) dkk.

47. Perkara TPK sehubungan dengan menerima hadiah atau janji terkait dengan jual beli gas alam untuk pembangkit listrik di Gresik dan Gili Timur Bangkalan Madura, Jawa Timur dan Proyek-proyek lainnya atas nama tersangka ABDUR ROUF (Swasta) dkk.
48. Perkara TPK sehubungan dengan Proses Permohonan Izin Pengembangan Kawasan Wisata di Lombok Barat Tahun 2010 s.d. 2012 atas nama tersangka ZAINI ARONY (Bupati Lombok Barat).
49. Perkara TPK sehubungan dengan Menerima hadiah atau janji terkait dengan Jual Beli Gas Alam Untuk Pembangkit Listrik di Gresik dan Gili Timur Bangkalan Madura, Jawa Timur dan perbuatan penerimaan lainnya atas nama tersangka H. FUAD AMIN (Bupati Kabupaten Bangkalan).
50. Perkara TPPU sehubungan dengan perbuatan menempatkan, mentransfer, mengalihkan, membelanjakan, membayarkan, menghibahkan, menitipkan, membawa ke luar negeri, mengubah bentuk, menukarkan dengan mata uang atau surat berharga atau perbuatan lain atas Harta Kekayaan yang diketahui atau patut diduga merupakan hasil tindak pidana korupsi dengan tujuan menyembunyikan atau menyamarkan asal usul Harta Kekayaan atas nama tersangka H. FUAD AMIN (Bupati Kabupaten Bangkalan) dkk.
51. Perkara TPK sehubungan dengan secara bersama-sama memberi atau menjanjikan sesuatu kepada pegawai negeri atau penyelenggara negara dengan maksud supaya pegawai negeri atau penyelenggara negara tersebut berbuat atau tidak berbuat sesuatu dalam jabatannya, yang bertentangan dengan kewajibannya terkait dengan pembahasan RAPBD.P Tahun 2014 dan atau RAPBD.P Tahun 2015 pada Provinsi Riau atas nama tersangka ANNAS MAAMUN (Gubernur Riau).
52. Perkara TPK sehubungan dengan pegawai negeri atau penyelenggara negara yang secara bersama-sama menerima pemberian atau janji dengan maksud supaya pegawai negeri atau penyelenggara negara tersebut berbuat atau tidak berbuat sesuatu dalam jabatannya, yang bertentangan dengan kewajibannya terkait dengan pembahasan RAPBD.P Tahun 2014 dan atau RAPBD.P Tahun 2015 pada Provinsi Riau atas nama tersangka A. KIRJUHARI (Anggota DPRD Riau)
53. Perkara TPK sehubungan dengan secara bersama-sama menerima hadiah atau janji pada saat menduduki jabatan selaku Kepala Biro Pembinaan Karir Deputy Sumber Daya Manusia Markas Besar Kepolisian Negara Republik Indonesia pada periode 2003 – 2006 dan jabatan lainnya di Kepolisian Negara Republik Indonesia atas nama tersangka BUDI GUNAWAN (Kepala Lembaga Pendidikan dan Pelatihan POLRI).
54. Perkara TPK sehubungan dengan memperkaya diri sendiri atau orang lain atau penyalahgunaan kewenangan, kesempatan atau sarana yang ada padanya karena jabatan atau kedudukan yang dapat merugikan keuangan negara yang dilakukan oleh Menteri Kebudayaan dan Pariwisata/Menteri Pariwisata dan Ekonomi Kreatif pada Tahun 2008 – 2011 atas nama

tersangka JERO WACIK (Menteri Kebudayaan dan Pariwisata/Menteri Pariwisata dan Ekonomi Kreatif Tahun 2008 – 2011).

55. Perkara TPK sehubungan dengan pegawai negeri atau penyelenggara negara yang dengan maksud menguntungkan diri sendiri atau orang lain yang secara melawan hukum atau menyalahgunakan kekuasaannya memaksa seseorang memberikan sesuatu, membayar, atau menerima pembayaran dengan potongan atau untuk mengerjakan sesuatu bagi dirinya sendiri atau yang pada waktu menjalankan tugas, meminta, menerima, memotong pembayaran kepada pegawai negeri atau penyelenggara negara lain atau kas umum tersebut mempunyai utang kepadanya, padahal diketahui bahwa hal tersebut bukan merupakan utang terkait dana kegiatan Tahun Anggaran 2013 – 2014 dan dana tugas pembantuan Tahun Anggaran 2014 pada Direktorat Jenderal Pembinaan Pembangunan Kawasan Transmigrasi Kementerian Tenaga Kerja dan Transmigrasi (Ditjen P2KTrans) atas nama tersangka JAMALUDDIEN MALIK (Direktur Jenderal P2Ktrans).

---

**Share :**

Bagikan 0

Tweet

## PENINDAKAN

Penyidikan (/id/berkas/penindakan/penyidikan)

Penuntutan (/id/berkas/penindakan/penuntutan)

Inkracht (/id/berkas/penindakan/inkracht)

Jejak Kasus (/id/jejak-kasus)





























## LINK

[TENTANG ACCH \(/ID/TENTANG-ACCH\).](#)

[DISCLAIMER \(/ID/DISCLAIMER\).](#)

[KETENTUAN \(/ID/KETENTUAN\).](#)

[SITEMAP \(/ID/SITEMAP\).](#)

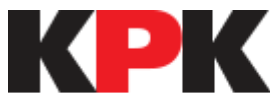

**Komisi Pemberantasan Korupsi**

[\(HTTPS://WWW.KPK.GO.ID/\)](https://www.kpk.go.id/)

## REDAKSI ACCH

KOMISI PEMBERANTASAN KORUPSI  
JL. KUNINGAN PERSADA KAV. 4 JAKARTA 12950  
TELP: (021) 2557 8300 EXT. 8642  
EMAIL: [ACCH@KPK.GO.ID](mailto:ACCH@KPK.GO.ID)  
([MAILTO:ACCH@KPK.GO.ID](mailto:ACCH@KPK.GO.ID)).
