# Supplementary material for: Democratization, leader education and growth: firm-level evidence from Indonesia
Source: Springer Nature journal article supplement (doi:10.1007/s10887-022-09221-5), 2023-02-15
Supplement: MOESM2 [file Penyidikan 2016.pdf › Data/Mayor-level corruption dataset (incl sources)/KPK Penyidikan 2006-/Penyidikan 2016.pdf]

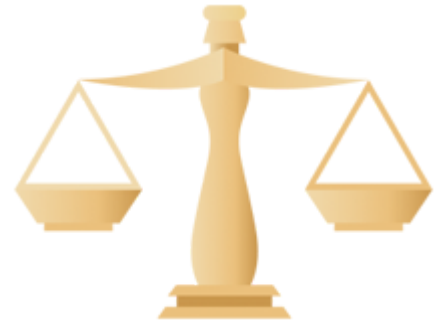

# PENINDAKAN

Menyajikan informasi perkembangan penanganan tindak pidana korupsi yang dilakukan oleh Komisi Pemberantasan Korupsi.

[Beranda \(/id/\)](#) / [Berkas](#) / [PENINDAKAN](#) / [Penyidikan \(/id/berkas/penindakan/penyidikan\)](#) / [Penyidikan 2016](#)

## PENYIDIKAN

### Penyidikan 2016

Ditulis oleh admin.acch. Diposting di [Penyidikan \(/id/berkas/penindakan/penyidikan\)](#). Dilihat: 6498

#### Desember

1. Perkara TPK memberi hadiah atau janji kepada Atty Suharti selaku Walikota Cimahi bersama H.M. Itoc Tochija, Ir. M.M. terkait dengan pembangunan fisik Pasar Kota Cimahi tahun anggaran 2016 dan 2017 atas nama tersangka TRISWARA DHANU BRATA alias ADE (Swasta) dan HENDRIZA SOLEH GUNADI alias ARI (Swasta).
2. Perkara TPK menerima hadiah atau janji dari Triswara Dhanu Brata alias Ade dan Hendriza Soleh Gunadi alias Ari terkait dengan pembangunan fisik Pasar Kota Cimahi tahun anggaran 2016 dan 2017 atas nama tersangka ATTY SUHARTI (Walikota Cimahi) dan H.M. ITOC TOCHIJA, Ir. M.M (PNS).
3. Perkara TPK secara bersama-sama dengan Sigit Widodo dan Dian Lestari Subekti Pertiwi serta Yudhi Tri Hartanto yaitu menerima hadiah atau janji dari Basikun Suwandin Atmojo alias Petruk dan Hartoyo terkait pembahasan dan pengesahan anggaran proyek di Dinas Pendidikan dan Olah Raga (Dikpora) dalam APBD-P Kab. Kebumen TA 2016 atas nama tersangka ADI PANDOYO (Sekda Kab. Kebumen).

4. Perkara TPK memberi atau menjanjikan sesuatu kepada Dian Lestari Subekti Pertiwi, Yudhi Tri Hartanto dan Adi Pandoyo serta Sigit Widodo terkait pembahasan dan pengesahan anggaran proyek di Dinas Pendidikan dan Olah Raga (Dikpora) dalam APBD-P Kab. Kebumen TA 2016 atas nama tersangka BASIKUN SUWANDIN ATMOJO alias PETRUK (Swasta).
  5. Perkara TPK setiap orang yang secara bersama-sama memberi atau menjanjikan sesuatu kepada penyelenggara negara dengan maksud supaya penyelenggara negara tersebut berbuat atau tidak berbuat sesuatu dalam jabatannya, yang bertentangan dengan kewajibannya terkait dengan Proses Pengadaan Satelit Monitoring di Bakamla RI pada APBN-P TA 2016, atas nama tersangka MUHAMMAD ADAMI OKTA (Swasta).
  6. Perkara TPK setiap orang yang secara bersama-sama memberi atau menjanjikan sesuatu kepada penyelenggara negara dengan maksud supaya penyelenggara negara tersebut berbuat atau tidak berbuat sesuatu dalam jabatannya, yang bertentangan dengan kewajibannya terkait dengan Proses Pengadaan Satelit Monitoring di Bakamla RI pada APBD-P TA 2016 atas nama tersangka HARDY STEFANUS (Swasta).
  7. Perkara TPK penyelenggara negara menerima hadiah atau janji padahal diketahui atau patut diduga bahwa hadiah atau janji tersebut diberikan untuk menggerakkan agar melakukan atau tidak melakukan sesuatu dalam jabatannya, yang bertentangan dengan kewajibannya terkait dengan Proses Pengadaan Satelit Monitoring di Bakamla RI pada APBN-P TA 2016 atas nama tersangka EKO SUSILO HADI (Deputi Bidang Informasi, Hukum, dan Kerjasama Bakamla RI/Kuasa Pengguna Anggaran pada Deputi Bidang Informasi, Hukum, dan Kerjasama Bakamla RI).
  8. Perkara TPK setiap orang yang secara bersama-sama memberi atau menjanjikan sesuatu kepada penyelenggara negara dengan maksud supaya penyelenggara negara tersebut berbuat atau tidak berbuat sesuatu dalam jabatannya, yang bertentangan dengan kewajibannya terkait dengan Proses Pengadaan Satelit Monitoring di Bakamla RI pada APBN-P TA 2016 atas nama tersangka FAHMI DARMAWANSYAH (Swasta).
  9. Perkara TPK berupa penerimaan sesuatu oleh Penyelenggara Negara terkait pengisian jabatan di Pemerintah Kabupaten Klaten, Jawa Tengah Tahun 2016 atas nama tersangka SURAMLAN (PNS).
  10. Perkara TPK berupa penerimaan sesuatu oleh Penyelenggara Negara terkait pengisian jabatan di Pemerintah Kabupaten Klaten, Jawa Tengah Tahun 2016 atas nama tersangka SRI HARTINI (Bupati).
- 

## **November**

1. Perkara TPK menerima gratifikasi yang berhubungan dengan jabatannya dan yang berlawanan dengan kewajiban atau tugasnya atas nama tersangka BAMBANG IRIANTO (Walikota Madiun).

2. Perkara TPK memberi atau menjanjikan sesuatu kepada pegawai negeri atau penyelenggara negara dengan maksud untuk mendapatkan persetujuan anggaran proyek-proyek di Direktorat Jenderal Bina Marga Kementerian Pekerjaan Umum dan Perumahan Rakyat Tahun Anggaran 2015 dan 2016 atas nama tersangka SO KOK SENG alias ASENS (Swasta).
3. Perkara TPK memberi hadiah atau janji kepada pegawai negeri atau penyelenggara negara terkait dengan pengurusan perkara di Pengadilan Negeri Jakarta Pusat dengan maksud supaya pegawai negeri atau penyelenggara negara tersebut berbuat atau tidak berbuat sesuatu dalam jabatannya atau karena berhubungan dengan suatu perbuatan yang berhubungan dengan jabatannya yang bertentangan dengan kewajibannya atas nama tersangka EDDY SINDORO.
4. Perkara TPK memberikan hadiah atau janji kepada pegawai negeri atau penyelenggara negara pada Direktorat Jenderal Pajak (DJP) atas nama tersangka RAMAPANICKER RAJAMOCHANAN NAIR (Swasta).
5. Perkara TPK menerima hadiah atau janji yang dilakukan oleh pegawai negeri atau penyelenggara negara pada Direktorat Jenderal Pajak (DJP) atas nama tersangka HANDANG SOEKARNO (Kasubdit Bukti Permulaan Direktorat Penegakan Hukum dan PPNS).
6. Perkara TPK dengan sengaja turut serta dalam pemborongan, pengadaan, atau persewaan, yang pada saat dilakukan perbuatan ditugaskan untuk mengurus atau mengawasi terkait dengan: a. Proyek Pembangunan Jembatan Kedungingas di Kabupaten Nganjuk tahun 2009, b. Proyek Rehabilitasi Saluran Melilir Nganjuk di Kabupaten Nganjuk tahun 2009, c. Proyek Perbaikan Jalan Sukomoro – Kecubung di Kabupaten Nganjuk tahun 2009, d. Proyek Rehabilitasi Saluran Pembuang Ganggangmalang di Kabupaten Nganjuk tahun 2009, e. Proyek Pemeliharaan Berkala Jalan Ngrengket – Mlorah di Kabupaten Nganjuk tahun 2009, atas nama tersangka TAUFIQURRAHMAN (Bupati Nganjuk).
7. Perkara TPK menerima gratifikasi yang berhubungan dengan jabatannya dan yang berlawanan dengan kewajibannya atau tugasnya atas nama tersangka TAUFIQURRAHMAN (Bupati Nganjuk).
8. Perkara TPK memberi atau menjanjikan sesuatu kepada pegawai negeri atau penyelenggara negara untuk pengurusan perkara nomor:454/Pidsus/2016/PN.Jkt.UTR pada Pengadilan Negeri Jakarta Utara atas nama tersangka SAIPUL JAMIL.

---

## Oktober

1. Perkara TPK yaitu baik langsung maupun tidak langsung dengan sengaja turut serta dalam pemborongan, pengadaan atau persewaan yang pada saat dilakukan perbuatan untuk seluruh atau sebagian ditugaskan untuk mengurus atau mengawasinya; atau menerima gratifikasi yang berhubungan dengan jabatannya yang berlawanan dengan kewajiban atau tugasnya; atau menerima hadiah atau janji padahal diketahui atau patut diduga diberikan karena kekuasaan atau kewenangan yang berhubungan dengan jabatan atau menurut pikiran orang yang

memberikan ada hubungan dengan jabatannya terkait pembangunan Pasar Besar Kota Madiun Tahun 2009 – 2012 atas nama tersangka H. BAMBANG IRIANTO (Walikota Madiun periode 2009 – 2014).

2. Perkara TPK menerima hadiah dari Hartoyo terkait pembahasan dan pengesahan Anggaran Dinas Pendidikan Kabupaten Kebumen dalam APBD-P Tahun 2016 atas nama tersangka YUDHY TRI HARTANTO (Anggota DPRD Kebumen) dan SIGIT WIDODO (PNS Dinas Pariwisata dan Kebudayaan Kab. Kebumen).
3. Perkara TPK memberi atau menjanjikan sesuatu kepada pegawai negeri atau penyelenggara negara terkait dengan pengesahan anggaran pendapatan dan belanja daerah Kabupaten Tanggamus Tahun Anggaran 2016 atas nama tersangka BAMBANG KURNIAWAN (Bupati Tanggamus).
4. Perkara TPK memberi atau menjanjikan sesuatu kepada hakim dengan maksud untuk mempengaruhi putusan perkara yang diserahkan kepadanya untuk diadili terkait dengan sengketa pemilihan kepada daerah Kabupaten Buton, Sulawesi Tenggara, di Mahkamah Konstitusi Tahun 2011/2012 kepada terpidana M. Akil Mochtar atas nama tersangka SAMSU UMAR ABDUL SAMIUN ALIAS UMAR SAMIUN (Bupati Buton 2012 – 2017).
5. Perkara TPK memberi hadiah kepada Yudhy Tri Hartanto dan Sigit Widodo terkait pembahasan dan pengesahan Anggaran Dinas Pendidikan Kabupaten Kebumen dalam APBD-P Tahun 2016 atas nama tersangka HARTOYO.
6. Perkara TPK penerimaan hadiah atau janji secara bersama-sama terkait pembahasan Anggaran Optimalisasi pada Direktorat Jenderal Pembinaan Pembangunan Kawasan Transmigrasi (DitjenP2Ktrans), Kementerian Tenaga Kerja dan Transmigrasi RI Tahun Anggaran 2014 atas nama tersangka CHARLES JONES MESANG (Anggota DPR RI 2009 – 2014).
7. Perkara TPK pengadaan pupuk urea tablet di Perum Perhutani unit 1 Jawa Tengah Tahun 2010 – 2011 atas nama tersangka HERU SISWANTO (Kepala Perum Perhutani Unit 1 Jawa Tengah).
8. Perkara TPK pengadaan pupuk urea tablet di Perum Perhutani unit 1 Jawa Tengah Tahun 2010 – 2011 atas nama tersangka BAMBANG WURYANTO (Kepala Biro Pembinaan Sumber Daya Hutan Perum Perhutani Unit 1 Jawa Tengah).
9. Perkara TPK pengadaan pupuk urea tablet di Perum Perhutani unit 1 Jawa Tengah Tahun 2010 – 2011 atas nama tersangka ASEP SUDRAJAT SANUSI (Dirut PT. Berdikari).
10. Perkara TPK pengadaan pupuk urea tablet di Perum Perhutani unit 1 Jawa Tengah Tahun 2012 – 2013 atas nama tersangka TEGUH HADI SISWANTO (Kepala Perum Perhutani Unit 1 Jawa Tengah).
11. Perkara TPK pengadaan pupuk urea tablet di Perum Perhutani unit 1 Jawa Tengah Tahun 2012 – 2013 atas nama tersangka LIBRATO EL ARIF (Dirut PT. Berdikari).
12. Perkara TPK penyalahgunaan kewenangan dalam menggunakan dana Pendidikan Luar Sekolah pada Sub Dinas PLS Dinas Pendidikan dan Kebudayaan Provinsi Nusa Tenggara Timur Tahun

## September

1. Perkara TPK secara bersama-sama menerima hadiah atau janji terkait dengan proses perencanaan, penganggaran dan pelaksanaan proyek pengadaan barang dan jasa di Dinas Pendidikan dan dinas-dinas lainnya di lingkungan Pemerintah Kabupaten Banyuasin atas nama tersangka YAN ANTON FERDIAN (Bupati Banyuasin Periode 2013-2018).
2. Perkara TPK secara bersama-sama pegawai negeri atau penyelenggara negara menerima hadiah atau janji terkait dengan proses perencanaan, penganggaran dan pelaksanaan proyek pengadaan barang dan jasa di Dinas Pendidikan dan dinas-dinas lainnya di lingkungan Pemerintah Kabupaten Banyuasin atas nama tersangka RUSTAMI (PNS - Kasubag Rumah Tangga Pemkab Banyuasin). Perkara TPK berupa pemberian hadiah atau janji terkait dengan proses perencanaan, penganggaran dan pelaksanaan proyek pengadaan barang dan jasa di Dinas Pendidikan dan dinas-dinas lainnya di lingkungan Pemerintah Kabupaten Banyuasin atas nama tersangka ZULFIKAR MUHARRAMI (Swasta).
3. Perkara TPK secara bersama-sama pegawai negeri atau penyelenggara negara menerima hadiah atau janji terkait dengan proses perencanaan, penganggaran dan pelaksanaan proyek pengadaan barang dan jasa di Dinas Pendidikan dan dinas-dinas lainnya di lingkungan Pemerintah Kabupaten Banyuasin atas nama tersangka UMAR USMAN (Pegawai Negeri Sipil di Kabupaten Banyuasin).
4. Perkara TPK secara bersama-sama pegawai negeri atau penyelenggara negara menerima hadiah atau janji terkait dengan proses perencanaan, penganggaran dan pelaksanaan proyek pengadaan barang dan jasa di Dinas Pendidikan dan dinas-dinas lainnya di lingkungan Pemerintah Kabupaten Banyuasin atas nama tersangka KIRMAN (Swasta).
5. Perkara TPK secara bersama-sama pegawai negeri atau penyelenggara negara menerima hadiah atau janji terkait dengan proses perencanaan, penganggaran dan pelaksanaan proyek pengadaan barang dan jasa di Dinas Pendidikan dan dinas-dinas lainnya di lingkungan Pemerintah Kabupaten Banyuasin atas nama tersangka SUTARYO (Kasie Pembangunan Peningkatan Mutu Pendidik dan Tenaga Kependidikan Dinas Pendidikan Kabupaten Banyuasin).
6. Perkara TPK setiap orang yang secara bersama-sama memberi atau menjanjikan sesuatu kepada penyelenggara dengan maksud supaya penyelenggara negara tersebut berbuat atau tidak berbuat sesuatu dalam jabatannya yang bertentangan dengan kewajibannya terkait dengan pengurusan kuota gula impor yang diberikan oleh Bulog kepada CV Semesta Berjaya di tahun 2016 atas nama tersangka XAVERIANDY SUTANTO (Swasta) dan MEMI (Swasta).
7. Perkara TPK penyelenggara negara yang menerima hadiah atau janji padahal diketahui atau patut diduga bahwa hadiah atau janji tersebut diberikan untuk menggerakkan agar melakukan

atau tidak melakukan sesuatu atau tidak berbuat sesuatu dalam jabatannya yang bertentangan dengan kewajibannya terkait dengan pengurusan kuota gula impor yang diberikan oleh Bulog kepada CV Semesta Berjaya di tahun 2016 atas nama tersangka IRMAN GUSMAN (Ketua DPD RI).

8. Perkara TPK setiap orang yang memberi atau menjanjikan sesuatu kepada penyelenggara dengan maksud supaya penyelenggara negara tersebut berbuat atau tidak berbuat sesuatu dalam jabatannya yang bertentangan dengan kewajibannya terkait dengan pengurusan perkara nomor: 520/Pidsus/2016/PN.PDG Tanggal 2 Agustus 2016 di Pengadilan Negeri Padang atas nama tersangka XAVERIANDY SUTANTO (Swasta) dan MEMI (Swasta).
9. Perkara TPK setiap orang yang memberi atau menjanjikan sesuatu kepada penyelenggara dengan maksud supaya penyelenggara negara tersebut berbuat atau tidak berbuat sesuatu dalam jabatannya yang bertentangan dengan kewajibannya terkait dengan pengurusan perkara nomor: 520/Pidsus/2016/PN.PDG Tanggal 2 Agustus 2016 di Pengadilan Negeri Padang atas nama tersangka FARIZAL (JPU Kajati Sumbar).
10. Perkara TPK dalam Pengadaan Paket Penerapan Kartu Tanda Penduduk Berbasis Nomor Induk Kependudukan Secara Nasional (KTP Elektronik) Tahun 2011 s.d. 2012 pada Kementerian Dalam Negeri Republik Indonesia atas nama tersangka IRMAN (Mantan Dirjen Kependudukan dan Pencatatan Sipil Kemendagri).

---

## Agustus

1. Perkara TPK menerima hadiah atau janji terkait pengurusan perkara di Mahkamah Agung RI dan penerimaan gratifikasi atas nama tersangka ROHADI (Panitera Pengganti pada PN Jakarta Utara dan PN Bekasi).
2. Perkara TPPU dalam hubungannya dengan perbuatan menempatkan, mentransfer, mengalihkan, membelanjakan, membayarkan, menghibahkan, menipiskan, membawa ke luar negeri, mengubah bentuk, menukarkan dengan mata uang atau surat berharga atau perbuatan lain atas harta kekayaan yang diketahui atau patut diduga merupakan hasil tindak pidana korupsi dengan tujuan menyembunyikan atau menyamarkan asal usul harta kekayaan dan atau menyembunyikan atau menyamarkan asal usul sumber, lokasi, peruntukan, pengalihan hak-hak, atau kepemilikan yang sebenarnya atas harta kekayaan yang diketahuinya atau patut diduga merupakan hasil tindak pidana atas nama tersangka ROHADI (Panitera Pengganti pada PN Jakarta Utara dan PN Bekasi).
3. Perkara TPK dalam Persetujuan Pencadangan Wilayah Pertambangan, Persetujuan Izin Usaha Pertambangan (IUP) Ekplorasi dan Persetujuan Peningkatan Izin Usaha Pertambangan Eksplorasi menjadi Izin Usaha Pertambangan Operasi Produksi kepada PT. Anugrah Harisma Barakah di Wilayah Provinsi Sulawesi Tenggara Tahun 2008-2014 atas nama tersangka NUR ALAM (Gubernur Sulawesi Tenggara).

## Juli

1. Perkara TPK secara bersama-sama memberi atau menjanjikan sesuatu kepada penyelenggara negara dengan maksud supaya penyelenggaraan negara tersebut berbuat atau tidak berbuat sesuatu dalam jabatannya yang bertentangan dengan kewajibannya terkait dengan putusan perkara perdata nomor: 503/PDT.G/2015/PN.JKT.PST antara PT. Mitra Maju Sukses (PT MMS) selaku penggugat dengan PT. Kapuas Tunggal Persada (PT. KTP) selaku tergugat di pengadilan negeri jakarta pusat atas nama tersangka AHMAD YANI (Swasta).
2. Perkara TPK secara bersama-sama memberi atau menjanjikan sesuatu kepada penyelenggara negara dengan maksud supaya penyelenggaraan negara tersebut berbuat atau tidak berbuat sesuatu dalam jabatannya yang bertentangan dengan kewajibannya terkait dengan putusan perkara perdata nomor: 503/PDT.G/2015/PN.JKT.PST antara PT. Mitra Maju Sukses (PT MMS) selaku penggugat dengan PT. Kapuas Tunggal Persada (PT. KTP) selaku tergugat di pengadilan negeri jakarta pusat atas nama tersangka RAOUL ADHITYA WIRANATAKUSUMAH (Pengacara).
3. Perkara TPK secara bersama-sama memberi atau menjanjikan sesuatu kepada penyelenggara negara dengan maksud supaya penyelenggaraan negara tersebut berbuat atau tidak berbuat sesuatu dalam jabatannya yang bertentangan dengan kewajibannya terkait dengan putusan perkara perdata nomor: 503/PDT.G/2015/PN.JKT.PST antara PT. Mitra Maju Sukses (PT MMS) selaku penggugat dengan PT. Kapuas Tunggal Persada (PT. KTP) selaku tergugat di pengadilan negeri jakarta pusat atas nama tersangka MUHAMMAD SANTOSO (Panitera Pengganti pada Pengadilan Negeri Jakarta Pusat).
4. Perkara TPK memberi hadiah atau janji kepada pejabat di PT. Berdikari (Persero) terkait dengan pengadaan atau pembelian pupuk di PT. Berdikari (Persero) atas nama tersangka ARIS HADIANTO (Swasta).

---

## Juni

1. Perkara TPPU dalam hubungannya dengan perbuatan menempatkan, mentransfer, mengalihkan, membelanjakan, membayarkan, menghibahkan, menitipkan, membawa ke luar negeri, mengubah bentuk, menukarkan dengan mata uang atau surat berharga atau perbuatan lain atas harta kekayaan yang diketahuinya atau patut diduganya merupakan hasil tindak pidana, atas nama tersangka OJANG SOHANDI (Bupati Subang).
2. Perkara TPK menerima hadiah atau janji dari Gatot Pujo Nugroho selaku Gubernur Provinsi Sumatera Utara terkait fungsi dan kewenangan tersangka selaku anggota DPRD Provinsi Sumatera Utara Periode 2009 – 2014 dan periode 2014 – 2019, atas nama tersangka MUHAMMAD AFAN (Anggota DPRD Prov. Sumut).
3. Perkara TPK menerima hadiah atau janji dari Gatot Pujo Nugroho selaku Gubernur Provinsi Sumatera Utara terkait fungsi dan kewenangan tersangka selaku anggota DPRD Provinsi

- Sumatera Utara Periode 2009 – 2014 dan periode 2014 – 2019, atas nama tersangka BUDIMAN PARDAMEAN NADAPDAP (Anggota DPRD Prov. Sumut).
4. Perkara TPK menerima hadiah atau janji dari Gatot Pujo Nugroho selaku Gubernur Provinsi Sumatera Utara terkait fungsi dan kewenangan tersangka selaku anggota DPRD Provinsi Sumatera Utara Periode 2009 – 2014 dan periode 2014 – 2019, atas nama tersangka GUNTUR MANURUNG (Anggota DPRD Prov. Sumut).
  5. Perkara TPK menerima hadiah atau janji dari Gatot Pujo Nugroho selaku Gubernur Provinsi Sumatera Utara terkait fungsi dan kewenangan tersangka selaku anggota DPRD Provinsi Sumatera Utara Periode 2009 – 2014 dan periode 2014 – 2019, atas nama tersangka ZULKIFLI EFFENDI SIREGAR (Anggota DPRD Prov. Sumut).
  6. Perkara TPK menerima hadiah atau janji dari Gatot Pujo Nugroho selaku Gubernur Provinsi Sumatera Utara terkait fungsi dan kewenangan tersangka selaku anggota DPRD Provinsi Sumatera Utara Periode 2009 – 2014 dan periode 2014 – 2019, atas nama tersangka BUSTAMI H.S. (Anggota DPRD Prov. Sumut).
  7. Perkara TPK menerima hadiah atau janji dari Gatot Pujo Nugroho selaku Gubernur Provinsi Sumatera Utara terkait fungsi dan kewenangan tersangka selaku anggota DPRD Provinsi Sumatera Utara Periode 2009 – 2014 dan periode 2014 – 2019, atas nama tersangka ZULKIFLI HUSEIN (Anggota DPRD Prov. Sumut).
  8. Perkara TPK menerima hadiah atau janji dari Gatot Pujo Nugroho selaku Gubernur Provinsi Sumatera Utara terkait fungsi dan kewenangan tersangka selaku anggota DPRD Provinsi Sumatera Utara Periode 2009 – 2014 dan periode 2014 – 2019, atas nama tersangka PARLUHUTAN SIREGAR (Anggota DPRD Prov. Sumut).
  9. Perkara TPK bersama-sama dengan Kasman Sangaji dalam memberi atau menjanjikan sesuatu kepada pegawai negeri atau penyelenggara negara untuk pengurusan perkara Nomor: 454/Pidsus/2016/PN.JKT.UTR pada Pengadilan Negeri Jakarta Utara atas nama tersangka BERTHANATALIA RURUK KARIMAN (Advokat) dan SAMSUL HIDAYATULLAH (Swasta).
  10. Perkara TPK bersama-sama dengan Kasman Sangaji dalam memberi atau menjanjikan sesuatu kepada pegawai negeri atau penyelenggara negara untuk pengurusan perkara Nomor: 454/Pidsus/2016/PN.JKT.UTR pada Pengadilan Negeri Jakarta Utara atas nama tersangka KASMAN SANGAJI (Advokat).
  11. Perkara TPK bersama-sama dengan Kasman Sangaji dalam memberi atau menjanjikan sesuatu kepada pegawai negeri atau penyelenggara negara untuk pengurusan perkara Nomor: 454/Pidsus/2016/PN.JKT.UTR pada Pengadilan Negeri Jakarta Utara atas nama tersangka ROHADI (Panitera Pengganti pada PN Jakut).



1. Perkara TPK memberi atau menjanjikan sesuatu berupa uang kepada Majelis Hakim Pengadilan Tipikor Bengkulu atas nama tersangka EDY SANTONI (Mantan Wadir Umum dan Keuangan RSUD M. Yunus Bengkulu).
  2. Perkara TPK bersama-sama dengan Toton selaku anggota Majelis Hakim Pengadilan Tipikor Bengkulu yaitu menerima pemberian hadiah atau janji sehubungan dengan perkara TPK terkait penyalahgunaan honor Dewan Pembina RSUD M.Yunus Bengkulu Tahun Anggaran 2011 yang sedang disidangkan di Pengadilan Tipikor Bengkulu atas nama terdakwa Edy Santoni dan terdakwa Safri, atas nama tersangka JANNER PURBA (Ketua Majelis Hakim Pengadilan Tipikor Bengkulu).
  3. Perkara TPK menerima pemberian hadiah atau janji sehubungan dengan perkara TPK terkait penyalahgunaan honor Dewan Pembina RSUD M.Yunus Bengkulu Tahun Anggaran 2011 yang sedang disidangkan di Pengadilan Tipikor Bengkulu atas nama terdakwa Edy Santoni dan terdakwa Safri, atas nama tersangka BADARUDDIN BACHSIN (Panitera Pengganti pada Pengadilan Tipikor Bengkulu).
- 

## **April**

1. Perkara TPK secara bersama-sama memberi atau mencoba memberi sesuatu kepada Kepala Kejaksaan Tinggi dan atau Asisten Tindak Pidana Khusus Kejaksaan Tinggi DKI guna menghentikan penyelidikan/penyidikan Tindak Pidana Korupsi pada PT. Brantas Abipraya di Kejaksaan Tinggi DKI Jakarta atas nama tersangka SUDI WANTOKO (Karyawan BUMN/Dirut) dan DANDUNG PAMULARNO (Karyawan BUMN).
2. Perkara TPK secara bersama-sama memberi atau mencoba memberi sesuatu kepada Kepala Kejaksaan Tinggi dan atau Asisten Tindak Pidana Khusus Kejaksaan Tinggi DKI guna menghentikan penyelidikan/penyidikan Tindak Pidana Korupsi pada PT. Brantas Abipraya di Kejaksaan Tinggi DKI Jakarta atas nama tersangka MARUDUT (Swasta).
3. Perkara TPK menerima sesuatu hadiah atau janji secara berlanjut terkait dengan pembahasan Rancangan Peraturan Daerah tentang Rencana Zonasi Wilayah Pesisir dan Pulau Pulau kecil Provinsi DKI Jakarta Tahun 2015 – 2035 dan Rancangan Peraturan Daerah tentang Rencana Tata Ruang Kawasan Strategis Pantai Utara Jakarta atas nama tersangka MOHAMAD SANUSI (Anggota DPRD Provinsi DKI Jakarta).
4. Perkara TPK memberi sesuatu hadiah atau janji secara berlanjut kepada Mohamad Sanusi selaku Anggota DPRD Provinsi DKI Jakarta periode 2014 – 2019 terkait dengan pembahasan Rancangan Peraturan Daerah tentang Rencana Zonasi Wilayah Pesisir dan Pulau Pulau kecil Provinsi DKI Jakarta Tahun 2015 – 2035 dan Rancangan Peraturan Daerah tentang Rencana

Tata Ruang Kawasan Strategis Pantai Utara Jakarta atas nama tersangka TRINANDA PRIHANTORO (Swasta).

5. Perkara TPK memberi sesuatu hadiah atau janji secara berlanjut kepada Mohamad Sanusi selaku Anggota DPRD Provinsi DKI Jakarta periode 2014 – 2019 terkait dengan pembahasan Rancangan Peraturan Daerah tentang Rencana Zonasi Wilayah Pesisir dan Pulau Pulau kecil Provinsi DKI Jakarta Tahun 2015 – 2035 dan Rancangan Peraturan Daerah tentang Rencana Tata Ruang Kawasan Strategis Pantai Utara Jakarta atas nama tersangka ARIESMAN WIDJAJA (Swasta).
6. Perkara TPK bersama-sama dengan Ojang Sohandi yaitu memberi hadiah atau janji kepada Fahri Nurmallo dan Deviyanti Rochaeni yang masing-masing sebagai Jaksa Penuntut Umum pada Kejaksaan Tinggi Jawa Barat, terkait penanganan perkara TPK Penyalahgunaan Anggaran dalam Pengelolaan Dana Kapitasi pada Program Jaminan Kesehatan Nasional di Dinas Kesehatan Kabupaten Subang Tahun Anggaran 2014 atas nama tersangka JAJANG ABDUL HOLIK (Mantan Kabid Kesehatan) dan LENIH MARLIANI (Swasta).
7. Perkara TPK bersama-sama dengan Jajang Abdul Holik dan Lenih Marliani yaitu memberi hadiah atau janji kepada Fahri Nurmallo dan Deviyanti Rochaeni yang masing-masing sebagai Jaksa Penuntut Umum pada Kejaksaan Tinggi Jawa Barat, terkait penanganan perkara TPK Penyalahgunaan Anggaran dalam Pengelolaan Dana Kapitasi pada Program Jaminan Kesehatan Nasional di Dinas Kesehatan Kabupaten Subang Tahun Anggaran 2014 atas nama tersangka OJANG SOHANDI (Bupati Subang).
8. Perkara TPK menerima hadiah atau janji terkait dengan penanganan perkara TPK Penyalahgunaan Anggaran dalam Pengelolaan Dana Kapitasi pada Program Jaminan Kesehatan Nasional di Dinas Kesehatan Kabupaten Subang Tahun Anggaran 2014 atas nama tersangka FAHRI NURMALLO (JPU pada Kejati Jabar) dan DEVIYANTI ROCHAENI (JPU pada Kejati Jabar).
9. Perkara TPK menerima gratifikasi yang berhubungan dengan jabatannya dan yang berlawanan dengan kewajiban atau tugasnya atas nama tersangka OJANG SOHANDI (Bupati Subang).
10. Perkara TPK memberi hadiah atau janji kepada Pejabat di PT. Berdikari (Persero) terkait dengan pengadaan atau pembelian pupuk di PT. Berdikari (Persero) atas nama tersangka SRI ASTUTI (Swasta).
11. Perkara TPK memberi hadiah atau janji kepada Pejabat di PT. Berdikari (Persero) terkait dengan pengadaan atau pembelian pupuk di PT. Berdikari (Persero) atas nama tersangka BUDIANTO HALIM WIDJAJA (Swasta).
12. Perkara TPK menerima hadiah atau janji dari Abdul Khoir selaku Direktur Utama PT. Windu Tunggal Utama terkait untuk mendapatkan pekerjaan di Kementerian Pekerjaan Umum dan Perumahan Rakyat Tahun Anggaran 2016 atas nama tersangka ANDI TAUFAN TIRO (Anggota Komisi V DPR RI).

13. Perkara TPK menerima hadiah atau janji dari Abdul Khoir guna mengupayakan Usulan Program Pembangunan Infrastruktur pada Kementerian Pekerjaan Umum dan Perumahan Rakyat di Maluku atau Maluku Utara serta menunjuk Abdul Khoir dan kawan-kawan sebagai pelaksananya atas nama tersangka AMRAN HI MUSTARY (Kepala BPJN IX Maluku dan Maluku Utara).
  14. Perkara TPK memberi hadiah atau janji kepada pegawai negeri atau penyelenggara negara terkait dengan pengurusan perkara di Pengadilan Negeri Jakarta Pusat dengan maksud supaya pegawai negeri atau penyelenggara negara tersebut berbuat atau tidak berbuat sesuatu dalam jabatannya atau karena berhubungan dengan suatu perbuatan yang berhubungan dengan jabatannya yang bertentangan dengan kewajibannya atas nama tersangka DODDY ARYANTO SUPENO (Swasta).
  15. Perkara TPK menerima hadiah atau janji padahal diketahui atau patut diduga bahwa hadiah atau janji tersebut diberikan untuk menggerakkan agar melakukan sesuatu dalam jabatannya atau karena diketahui telah melakukan sesuatu dalam jabatannya yang bertentangan dengan kewajibannya atas nama tersangka EDY NASUTION (Panitera/Sekretaris pada PN Jakarta Pusat).
- 

## **Maret**

1. Perkara TPK dalam pekerjaan pembangunan Rumah Sakit Pendidikan Universitas Airlangga Surabaya dengan sumber dana DIPA Universitas Airlangga Tahun 2007 s/d 2010 dan TPK dalam peningkatan sarana dan prasarana Rumah Sakit Universitas Airlangga Tahun 2009 atas nama tersangka FASICH (Rektor/KPA Universitas Airlangga).
  2. Perkara TPK pegawai negeri atau penyelenggara negara yang bersama-sama menerima hadiah atau janji dengan maksud supaya pegawai negeri atau penyelenggara negara tersebut berbuat atau tidak berbuat sesuatu dalam jabatannya, yang bertentangan dengan kewajibannya terkait dengan Pembahasan RAPBD-P TA 2014 dan/atau RAPBD TA 2015 pada Provinsi Riau atas nama tersangka H.M. JOHAR FIRDAUS (Ketua DPRD Riau 2009-2014) bersama-sama dengan SUPARMAN (Anggota DPRD Prov. Riau 2009-2014).
- 

## **Februari**

1. PPerkara TPK menguntungkan diri sendiri atau orang lain secara melawan hukum atau dengan menyalahgunakan kekuasaannya memaksa seseorang memberikan sesuatu, membayar atau untuk mengerjakan sesuatu bagi dirinya sendiri, terkait Restitusi Lebih Bayar Pajak atas Pajak Penghasilan (PPh) Badan Tahun 2012 dan Pajak Pertambahan Nilai (PPN) Masa Februari Tahun 2013 PT. Elektronik Design and Manufacturing International (EDMI) Indonesia atas nama

- tersangka HERRY SETIADJI, INDARTO CATUR NUGROHO, dan SLAMET RIYANA (Pemeriksa Pajak KPP Pratama Jakarta Kebayoran Baru).
2. Perkara TPK menerima hadiah atau janji terkait dengan persetujuan Laporan Keterangan Pertanggungjawaban (LKPJ) Kepala Daerah Musi Banyuasin Tahun Anggaran 2014 dan Pengesahan Anggaran Pendapatan dan Belanja Daerah (APBD) Kabupaten Musi Banyuasin Tahun Anggaran 2015 atas nama tersangka UJANG M. AMIN, JAINI, PARLINDUNGAN HARAHAP, DEPY IRAWAN, DEAR FAUZUL AZIM, dan IIN FEBRIANTO (Anggota DPRD Kabupaten Musi Banyuasin Periode 2014-2019).
  3. Perkara TPK menerima hadiah atau janji terkait pengiriman putusan kasasi perkara korupsi Pekerjaan Pembangunan Dermaga Labuhan Haji, Kabupaten Lombok Timur di Mahkamah Agung RI atas nama tersangka ANDRI TRISTIANTO SUTRISNA (Kasubdit Kasasi Perdata pada Direktorat Pranata dan Tatalaksana Perkara Perdata Mahkamah Agung RI).
  4. Perkara TPK memberi hadiah atau janji kepada Andri Tristianto Sutrisna selaku Kasubdit Kasasi Perdata pada Direktorat Pranata dan Tatalaksana Perkara Perdata Mahkamah Agung RI, terkait dengan Pengiriman Putusan Kasasi Perkara Korupsi Pekerjaan Pembangunan Dermaga Labuhan Haji, Kabupaten Lombok Timur di Mahkamah Agung RI atas nama tersangka ICHSAN SUAIDI (Swasta) dan AWANG LAZUARDI EMBAT (Swasta).
  5. Perkara TPK dalam pengadaan dan pelaksanaan pekerjaan konstruksi Pembangunan Gedung Kampus Institut Pemerintahan Dalam Negeri (IPDN) Provinsi Sumatera Barat di Kabupaten Agam pada Kementerian Dalam Negeri RI Tahun Anggaran 2011 atas nama tersangka DUDY JOCOM (PPK Pusat Administrasi Keuangan dan Pengelolaan Aset Setjen Kementerian Dalam Negeri).
  6. Perkara TPK dalam pengadaan dan pelaksanaan pekerjaan konstruksi Pembangunan Gedung Kampus Institut Pemerintahan Dalam Negeri (IPDN) Provinsi Sumatera Barat di Kabupaten Agam pada Kementerian Dalam Negeri RI Tahun Anggaran 2011 atas nama tersangka BUDI RACHMAT KURNIAWAN (Swasta).
  7. Perkara TPK menerima hadiah terkait dengan pengadaan atau pembelian pupuk di PT. Berdikari atas nama tersangka SITI MARWA (Swasta).
  8. Perkara TPK menerima hadiah atau janji dari Abdul Khoir terkait dengan pekerjaan di Kementerian Pekerjaan Umum dan Perumahan Rakyat Tahun Anggaran 2016 atas nama tersangka BUDI SUPRIYANTO (Anggota Komisi V DPR RI).
- 

## Januari

1. Perkara TPK dalam pengadaan dan pemasangan Pembangkit Listrik Tenaga Surya (PLTS) berupa Solar Home System (SHS) dan Pembangkit Listrik Tenaga Mikro Hidro (PLTMH) pada Direktorat Jenderal Listrik dan Pemanfaatan Energi Departemen Energi dan Sumber Daya

Mineral (LPE ESDM) tahun anggaran 2009 atas nama tersangka JACOB PURWONO (Dirjen LPE Departemen ESDM).

2. Perkara TPK dalam pengadaan Driving Simulator Roda Dua (R2) dan Roda Empat (R4) pada Korps Lalu Lintas Mabes Polri TA 2011 atas nama tersangka SUKOTJO S BAMBANG (Swasta).
3. Perkara TPK pengadaan alat kesehatan Kedokteran Umum Puskesmas Kota Tangerang Selatan APBDP Tahun Anggaran 2012 atas nama tersangka TUBAGUS CHAERI WARDANA CHASAN alias TB. CHAERI WARDANA (Swasta).
4. Perkara TPK yaitu pegawai negeri atau penyelenggara negara yang dengan maksud menguntungkan diri sendiri atau orang lain secara melawan hukum, atau dengan menyalahgunakan kekuasaannya memaksa seseorang memberikan sesuatu, membayar, dan atau menerima pembayaran dengan potongan, atau untuk mengerjakan sesuatu bagi dirinya sendiri; atau pegawai negeri atau penyelenggara negara yang menerima hadiah atau janji padahal diketahui atau patut diduga, bahwa hadiah atau janji tersebut diberikan untuk menggerakkan agar melakukan sesuatu atau disebabkan karena telah melakukan atau tidak melakukan sesuatu yang bertentangan dengan kewajibannya atau diberikan karena kekuasaan atau kewenangan yang berhubungan dengan jabatannya atas nama tersangka RATU ATUT CHOSIYAH (Gubernur Banten).
5. Perkara TPK pengadaan sarana dan prasarana alat kesehatan dan pengadaan lainnya di lingkungan Pemerintah Provinsi Banten Tahun 2011 – 2013 atas nama tersangka RATU ATUT CHOSIYAH (Gubernur Banten).
6. Perkara TPK pengadaan sarana dan prasarana alat kesehatan dan pengadaan lainnya di lingkungan Pemerintah Provinsi Banten Tahun 2011 – 2013 atas nama tersangka TUBAGUS CHAERI WARDANA CHASAN (Swasta).
7. Perkara TPPU sehubungan dengan dengan perbuatan menempatkan, mentransfer, mengalihkan, membelanjakan, membayarkan, menghibahkan, menitipkan, membawa ke luar negeri, mengubah bentuk, menukarkan dengan mata uang atau surat berharga atau perbuatan lain atas harta kekayaan yang diketahui atau patut diduganya merupakan hasil tindak pidana korupsi dengan tujuan menyembunyikan atau menyamarkan asal usul harta kekayaan dan atau menyembunyikan atau menyamarkan asal usul sumber, lokasi, peruntukkan, pengalihan hak-hak, atau kepemilikan yang sebenarnya atas harta kekayaan yang diketahuinya atau patut diduganya merupakan hasil tindak pidana korupsi atas nama tersangka TUBAGUS CHAERI WARDANA (Swasta).
8. Perkara TPK sehubungan dengan orang yang melakukan pembantuan terkait tindak pidana korupsi dalam pengadaan alat kesehatan untuk kebutuhan antisipasi Kejadian Luar Biasa (KLB) masalah kesehatan akibat bencana di Pusat Penanggulangan masalah Kesehatan pada Departemen Kesehatan Tahun Anggaran 2005 yang dilakukan oleh Mulya Hasjmy atas nama tersangka SITI FADILLAH SUPARI (Mantan Menteri Kesehatan RI periode Tahun 2004 – 2009).

9. Perkara TPK sehubungan dengan pengadaan paket penerapan Kartu Tanda Penduduk Berbasis Nomor Induk Kependudukan Secara Nasional (KTP Elektronik) tahun 2011 s.d. 2012 pada Kementerian Dalam Negeri RI atas nama tersangka SUGIHARTO (PPK Direktorat Jenderal Kependudukan dan Catatan Sipil Kementerian Dalam Negeri RI).
10. Perkara TPK sehubungan dengan perbuatan melawan hukum atau penyalahgunaan wewenang dalam menerima seluruh permohonan keberatan wajib pajak atas SKPN PPh Badan PT. BCA, Tbk. Tahun pajak 1999 atas nama tersangka HADI POERNOMO (Dirjen Pajak Kementerian Keuangan RI Periode Tahun 2002-2004).
11. Perkara TPK sehubungan dengan Penyalahgunaan kewenangan dalam menggunakan Dana Pendidikan Luar Sekolah pada Sub Dinas PLS Dinas Pendidikan dan Kebudayaan Provinsi Nusa Tenggara Timur Tahun Anggaran 2007 atas nama tersangka MARTHEN DIRA TOME (Kasubdin PLS Provinsi NTT/ PPK).
12. Perkara TPK sehubungan dengan menerima pemberian atau janji dalam kegiatan pengadaan alat kesehatan I untuk kebutuhan Pusat Penanggulangan Krisis Departemen Kesehatan dari dana DIPA revisi APBN Pusat Penanggulangan Krisis Sekretariat Jenderal Departemen Kesehatan Tahun Anggaran 2007 atas nama tersangka SITI FADILAH SUPARI (Menteri Kesehatan Republik Indonesia Periode tahun 2004 - 2009).
13. Dugaan TPK sehubungan dengan Pengadaan Alat Kesehatan Rumah Sakit Khusus Pendidikan Penyakit Infeksi dan Pariwisata Universitas Udayana pada Tahun Anggaran 2009 atas nama tersangka MARISI MATONDANG (Swasta).
14. Perkara TPK sehubungan dengan secara bersama-sama memberi atau menjanjikan sesuatu kepada pegawai negeri atau penyelenggara negara dengan maksud supaya pegawai negeri atau penyelenggara negara tersebut berbuat atau tidak berbuat sesuatu dalam jabatannya, yang bertentangan dengan kewajibannya terkait dengan pembahasan RAPBD.P Tahun 2014 dan atau RAPBD.P Tahun 2015 pada Provinsi Riau atas nama tersangka ANNAS MAAMUN (Gubernur Riau).
15. Perkara TPK sehubungan dengan Pembangunan Dermaga Bongkar Lanjutan, Sabang yang dibiayai Anggaran Pendapatan dan Belanja Negara (APBN) Tahun Anggaran 2011 atas nama tersangka RUSLAN ABD. GANI (Kepala Badan Pengusahaan Kawasan Perdagangan Bebas Dan Pelabuhan Bebas Sabang (BPKS) Tahun 2011).
16. Perkara TPK pemberian sesuatu atau uang bersama-sama dengan Willy Sebastian Lim kepada Suroso Atmomartoyo dalam proyek pengadaan Tethra Ethyl Lead (TEL) di PT. Pertamina (Persero) tahun 2004 – 2005 atas nama tersangka MUHAMMAD SYAKIR (Swasta).
17. Perkara TPK dalam pekerjaan Pembangunan Rumah Sakit Pendidikan Khusus Penyakit Infeksi dan Pariwisata Universitas Udayana Tahun Anggaran 2009 s.d. 2011 atas nama tersangka MADE MEREGAWA (PPK Universitas Udayana).
18. Perkara TPK dalam pekerjaan Pembangunan Rumah Sakit Pendidikan Khusus Penyakit Infeksi dan Pariwisata Universitas Udayana Tahun Anggaran 2009 s.d. 2011 atas nama tersangka

DUDUNG PURWADI (Swasta).

19. Perkara TPK dalam pengadaan peralatan kesehatan dan laboratorium RS Tropik Infeksi di Universitas Airlangga Tahap I dan II Tahun Anggaran 2010 atas nama tersangka MINARSIH (Swasta). Perkara TPK dalam pengadaan peralatan kesehatan dan laboratorium RS Tropik Infeksi di Universitas Airlangga Tahap I dan II Tahun Anggaran 2010 dan atau TPK pegawai negeri atau penyelenggara negara yang menerima pemberian atau janji padahal patut diketahui atau diduga bahwa hadiah tersebut diberikan untuk menggerakkan atau sebagai akibat karena telah melakukan atau tidak melakukan sesuatu dalam jabatannya yang bertentangan dengan kewajibannya atas nama tersangka BAMBANG GIATNO RAHARDJO (Kepala Badan Pengembangan dan Pemberdayaan Sumber Daya Manusia Kesehatan Kemenkes).
20. Perkara TPK dalam pengadaan dan pelaksanaan Pembangunan Balai Pendidikan dan Pelatihan Ilmu Pelayaran (BP2IP) Sorong Tahap III pada Pusat Pengembangan SDM Perhubungan Laut (PPSDML) Badan Pengembangan SDM Kementerian Perhubungan Tahun Anggaran 2011 atas nama tersangka BOBBY REYNOLD MAMAHIT (Kepala Badan Pengembangan SDM Perhubungan (BPSDM)).
21. Perkara TPK dalam pengadaan dan pelaksanaan Pembangunan Balai Pendidikan dan Pelatihan Ilmu Pelayaran (BP2IP) Sorong Tahap III pada Pusat Pengembangan SDM Perhubungan Laut (PPSDML) Badan Pengembangan SDM Kementerian Perhubungan Tahun Anggaran 2011 atas nama tersangka DJOKO PRAMONO (Kepala Badan Pengembangan SDM Perhubungan Laut (BPSDML)).
22. Perkara TPK memberi hadiah atau janji kepada anggota DPRD Provinsi Sumatera Utara periode 2009 s.d. 2014 dan 2014 s.d. 2019 terkait dengan: 1. Persetujuan laporan pertanggungjawaban Pemerintah Provinsi Sumatera Utara tahun anggaran 2012 s.d. 2014 oleh DPRD Provinsi Sumatera Utara; 2. Persetujuan perubahan anggaran pendapatan dan belanja daerah provinsi sumatera utara tahun anggaran 2013 dan 2014 oleh DPRD provinsi sumatera utara; 3. Pengesahan anggaran pendapatan dan belanja daerah provinsi sumatera utara tahun anggaran 2014 dan 2015 oleh DPRD provinsi sumatera utara; dan 4. Penolakan penggunaan hak interpelasi oleh DPRD provinsi sumatera utara pada tahun 2015 atas nama tersangka GATOT PUJO NUGROHO (Gubernur Provinsi Sumatera Utara) dkk.
23. Perkara TPK menerima hadiah atau janji dari Gatot Pujo Nugroho selaku Gubernur Provinsi Sumatera Utara terkait dengan: 1. Persetujuan laporan pertanggungjawaban Pemerintah Provinsi Sumatera Utara tahun anggaran 2012 oleh DPRD Provinsi Sumatera Utara; 2. Persetujuan perubahan anggaran pendapatan dan belanja daerah provinsi sumatera utara tahun anggaran 2013 oleh DPRD provinsi sumatera utara; 3. Pengesahan anggaran pendapatan dan belanja daerah provinsi sumatera utara tahun anggaran 2014 oleh DPRD provinsi sumatera utara; 4. Pengesahan anggaran pendapatan dan belanja daerah provinsi sumatera utara tahun anggaran 2015 oleh DPRD provinsi sumatera utara; 5. Persetujuan laporan pertanggungjawaban Pemerintah Provinsi Sumatera Utara tahun anggaran 2014 oleh DPRD

Provinsi Sumatera Utara; dan 6. Penolakan penggunaan hak interpelasi oleh DPRD provinsi Sumatera Utara pada tahun 2015 atas nama tersangka SALEH BANGUN (Ketua DPRD Provinsi Sumatera Utara).

24. Perkara TPK menerima hadiah atau janji dari Gatot Pujo Nugroho selaku Gubernur Provinsi Sumatera Utara terkait dengan: 1. Persetujuan laporan pertanggungjawaban Pemerintah Provinsi Sumatera Utara tahun anggaran 2012 oleh DPRD Provinsi Sumatera Utara; 2. Persetujuan perubahan anggaran pendapatan dan belanja daerah provinsi Sumatera Utara tahun anggaran 2013 oleh DPRD provinsi Sumatera Utara; 3. Pengesahan anggaran pendapatan dan belanja daerah provinsi Sumatera Utara tahun anggaran 2014 oleh DPRD provinsi Sumatera Utara; 4. Pengesahan anggaran pendapatan dan belanja daerah provinsi Sumatera Utara tahun anggaran 2015 oleh DPRD provinsi Sumatera Utara; 5. Persetujuan laporan pertanggungjawaban Pemerintah Provinsi Sumatera Utara tahun anggaran 2014 oleh DPRD Provinsi Sumatera Utara; dan 6. Penolakan penggunaan hak interpelasi oleh DPRD provinsi Sumatera Utara pada tahun 2015 atas nama tersangka CHAIDIR RITONGA (Wakil Ketua DPRD Provinsi Sumatera Utara) dkk.
25. Perkara TPK menerima hadiah atau janji dari Gatot Pujo Nugroho selaku Gubernur Provinsi Sumatera Utara terkait dengan: 1. Persetujuan laporan pertanggungjawaban Pemerintah Provinsi Sumatera Utara tahun anggaran 2012 oleh DPRD Provinsi Sumatera Utara; 2. Persetujuan perubahan anggaran pendapatan dan belanja daerah provinsi Sumatera Utara tahun anggaran 2013 oleh DPRD provinsi Sumatera Utara; 3. Pengesahan anggaran pendapatan dan belanja daerah provinsi Sumatera Utara tahun anggaran 2014 oleh DPRD provinsi Sumatera Utara; 4. Pengesahan anggaran pendapatan dan belanja daerah provinsi Sumatera Utara tahun anggaran 2015 oleh DPRD provinsi Sumatera Utara atas nama tersangka SIGIT PRAMONO ASRI (Wakil Ketua DPRD Provinsi Sumatera Utara) dkk.
26. Perkara TPK menerima hadiah atau janji dari Gatot Pujo Nugroho selaku Gubernur Provinsi Sumatera Utara terkait dengan: 1. Persetujuan laporan pertanggungjawaban Pemerintah Provinsi Sumatera Utara tahun anggaran 2012 oleh DPRD Provinsi Sumatera Utara; 2. Persetujuan perubahan anggaran pendapatan dan belanja daerah provinsi Sumatera Utara tahun anggaran 2013 oleh DPRD provinsi Sumatera Utara; 3. Pengesahan anggaran pendapatan dan belanja daerah provinsi Sumatera Utara tahun anggaran 2014 oleh DPRD provinsi Sumatera Utara; 4. Pengesahan anggaran pendapatan dan belanja daerah provinsi Sumatera Utara tahun anggaran 2015 oleh DPRD provinsi Sumatera Utara; 5. Persetujuan laporan pertanggungjawaban Pemerintah Provinsi Sumatera Utara tahun anggaran 2014 oleh DPRD Provinsi Sumatera Utara; dan 6. Penolakan penggunaan hak interpelasi oleh DPRD provinsi Sumatera Utara pada tahun 2015 atas nama tersangka AJIB SHAH (Anggota DPRD Provinsi Sumatera Utara periode 2009 s.d. 2014 dan Ketua DPRD Provinsi Sumatera Utara periode 2014 s.d. 2015) dkk.



27. Perkara TPK memberi atau menjanjikan sesuatu kepada pegawai negeri atau penyelenggara negara dengan maksud supaya pegawai negeri atau penyelenggara negara tersebut berbuat atau tidak berbuat sesuatu dalam jabatannya, yang bertentangan dengan kewajibannya terkait dengan pengajuan revisi alih fungsi hutan di provinsi Riau tahun 2014 kepada kementerian kehutanan atas nama tersangka EDISON MARUDUT MARDASAUJI SIAHAAN (swasta).
28. Perkara TPK memberi atau menjanjikan sesuatu kepada pegawai negeri atau penyelenggara negara dengan maksud supaya pegawai negeri atau penyelenggara negara tersebut berbuat atau tidak berbuat sesuatu dalam jabatannya, yang bertentangan dengan jabatannya terkait dengan pengesahan APBD Pemerintah Daerah Provinsi Banten T.A. 2016 atas nama tersangka FL. TRI SATRIYA SANTOSA (Anggota DPRD Prov. Banten).
29. Perkara TPK memberi atau menjanjikan sesuatu kepada pegawai negeri atau penyelenggara negara dengan maksud supaya pegawai negeri atau penyelenggara negara tersebut berbuat atau tidak berbuat sesuatu dalam jabatannya, yang bertentangan dengan jabatannya terkait dengan pengesahan APBD Pemerintah Daerah Provinsi Banten T.A. 2016 atas nama tersangka H. SRIMULYAHARTONO (Anggota DPRD Prov. Banten).
30. Perkara TPK dalam kegiatan pembangunan Wisma Atlet dan Gedung Serbaguna Pemerintah Provinsi Sumatera Selatan Tahun 2010 – 2011 atas nama tersangka DUDUNG PURWADI (Swasta).
31. Perkara TPK dengan cara memerintahkan melakukan pengadaan 3 (tiga) unit Quay Container Crane (QCC) di Pelindo II (Persero) tahun 2010 dengan menunjuk langsung Wuxi HuaDong Heavy Machinery Co, Ltd (HDHM) dari China sebagai penyedia barang atas nama tersangka R.J. LINO (Dirut PT. Pelindo II) dkk.
32. Perkara TPK secara bersama-sama dengan Andi Alfian Mallarangeng selaku Menteri Pemuda dan Olahraga dan kawan-kawan terkait dengan proyek pembangunan/pengadaan/peningkatan sarana dan prasarana olahraga di Hambalang TA 2010-2012 atas nama tersangka ANDI ZULKARNAIN ANWAR alias CHOEL (Swasta).
33. Perkara TPK secara bersama-sama atau turut serta dalam pengadaan Reagen dan Consumable Penanganan Virus Flu Burung dengan menggunakan dana APBN-P Direktorat Bina Pelayanan Medik Dasar Direktorat Jenderal Bina Pelayanan Medik Depkes RI Tahun Anggaran 2007 atas nama tersangka FREDDY LUMBAN TOBING (Swasta).
34. Perkara TPK memberi atau menjanjikan sesuatu kepada pegawai negeri atau penyelenggara negara dengan maksud untuk mendapatkan pekerjaan di Kementerian Pekerjaan Umum dan Perumahan Rakyat Tahun Anggaran 2016 atas nama tersangka ABDUL KHOIR (Swasta).
35. Perkara TPK menerima hadiah atau janji dari ABDUL KHOIR selaku Direktur Utama PT. Windu Tunggal Utama terkait untuk mendapatkan pekerjaan di Kementerian Pekerjaan Umum dan Perumahan Rakyat Tahun Anggaran 2016 atas nama tersangka DAMAYANTI WISNU PUTRANTI (Anggota Komisi V DPR RI).

36. Perkara TPK turut serta atau bersama-sama dengan DAMAYANTI WISNU PUTRANTI dan DESSY A EDWIN selaku anggota Komisi V DPR RI dalam menerima hadiah atau janji dari ABDUL KHOIR selaku Direktur Utama PT. Windu Tunggal Utama terkait untuk mendapatkan pekerjaan di Kementerian Pekerjaan Umum dan Perumahan Rakyat Tahun Anggaran 2016 atas nama tersangka JULIA PRASETYARINI.
37. Perkara TPK turut serta atau bersama-sama dengan DAMAYANTI WISNU PUTRANTI dan JULIA PRASETYANI selaku anggota Komisi V DPR RI dalam menerima hadiah atau janji dari ABDUL KHOIR selaku Direktur Utama PT. Windu Tunggal Utama terkait untuk mendapatkan pekerjaan di Kementerian Pekerjaan Umum dan Perumahan Rakyat Tahun Anggaran 2016 atas nama tersangka DESSY A EDWIN.
38. Perkara TPK dalam pengadaan fasilitasi sarana budidaya mendukung pengendalian OPT dalam rangka belanja barang fisik lainnya untuk diserahkan kepada masyarakat/Pemda di Kementerian Pertanian tahun anggaran 2013 atas nama tersangka HASANUDDIN IBRAHIM (Dirjen Holtikultura/KPA).
39. Perkara TPK dalam pengadaan fasilitasi sarana budidaya mendukung pengendalian OPT dalam rangka belanja barang fisik lainnya untuk diserahkan kepada masyarakat/Pemda di Kementerian Pertanian tahun anggaran 2013 atas nama tersangka EKO MARDIYANTO (PPK pada Dirjen Holtikultura).
40. Perkara TPK dalam pengadaan fasilitasi sarana budidaya mendukung pengendalian OPT dalam rangka belanja barang fisik lainnya untuk diserahkan kepada masyarakat/Pemda di Kementerian Pertanian tahun anggaran 2013 atas nama tersangka SUTRISNO.

---

**Share :**

Bagikan 0

Tweet

## PENINDAKAN

Penyidikan (/id/berkas/penindakan/penyidikan)

Penuntutan (/id/berkas/penindakan/penuntutan)

Inkracht (/id/berkas/penindakan/inkracht)

Jejak Kasus (/id/jejak-kasus)

































[TENTANG ACCH \(/ID/TENTANG-ACCH\)](#).

[DISCLAIMER \(/ID/DISCLAIMER\)](#).

[KETENTUAN \(/ID/KETENTUAN\)](#).

[SITEMAP \(/ID/SITEMAP\)](#).

KOMISI PEMBERANTASAN KORUPSI  
JL. KUNINGAN PERSADA KAV. 4 JAKARTA 12950  
TELP: (021) 2557 8300 EXT. 8642  
EMAIL: [ACCH@KPK.GO.ID](mailto:ACCH@KPK.GO.ID)  
([MAILTO:ACCH@KPK.GO.ID](mailto:ACCH@KPK.GO.ID)).

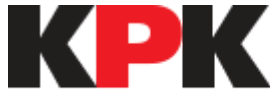

**Komisi Pemberantasan Korupsi**

[\(HTTPS://WWW.P3C.GO.ID/\)](https://www.p3c.go.id/) [\(HTTPS://WWW.KPK.GO.ID/\)](https://www.kpk.go.id/) [\(HTTPS://WWW.ACCH.GO.ID/\)](https://www.acch.go.id/) [\(HTTPS://WWW.KPK.GO.ID/CSAR/BERITA/KPK/\)](https://www.kpk.go.id/csar/berita/kpk/)

COPYRIGHT © 2017 ANTI-CORRUPTION CLEARING HOUSE. ALL RIGHTS RESERVED
