# Supplementary material for: Democratization, leader education and growth: firm-level evidence from Indonesia
Source: Springer Nature journal article supplement (doi:10.1007/s10887-022-09221-5), 2023-02-15
Supplement: MOESM2 [file Penyidikan 2017.pdf › Data/Mayor-level corruption dataset (incl sources)/KPK Penyidikan 2006-/Penyidikan 2017.pdf]

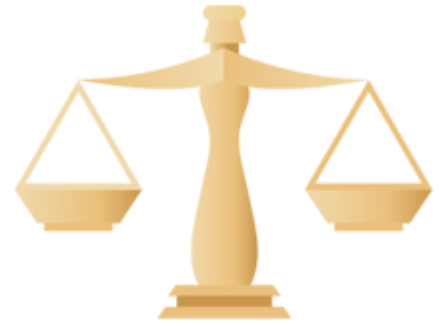

# PENINDAKAN

Menyajikan informasi perkembangan penanganan tindak pidana korupsi yang dilakukan oleh Komisi Pemberantasan Korupsi.

[Beranda \(/id/\)](#) / [Berkas](#) / [PENINDAKAN](#) / [Penyidikan \(/id/berkas/penindakan/penyidikan\)](#) / [Penyidikan 2017](#)

## PENYIDIKAN

### Penyidikan 2017

Ditulis oleh admin.acch. Diposting di [Penyidikan \(/id/berkas/penindakan/penyidikan\)](#). Dilihat: 8161

Sepanjang tahun 2017, kegiatan penyidikan yang dijalankan oleh KPK sebanyak 182 (seratus delapan puluh dua) perkara, yang terdiri atas perkara sisa tahun 2016 sebanyak 61 (enam puluh satu) perkara dan perkara tahun 2017 sebanyak 121 (seratus dua puluh satu) perkara.

#### Desember

1. Perkara TPPU sehubungan dengan perbuatan menempatkan, mentransfer, mengalihkan, membelanjakan, membayarkan, menghibahkan, menitipkan, membawa ke luar negeri, mengubah bentuk, menukarkan dengan mata uang atau surat berharga atau perbuatan lain atas Harta Kekayaan yang diketahui atau patut diduga merupakan hasil tindak pidana korupsi dengan tujuan menyembunyikan atau menyamarkan asal usul Harta Kekayaan dan atau menyembunyikan atau menyamarkan asal usul, sumber, lokasi, peruntukan pengalihan hak-hak, atau kepemilikan yang sebenarnya atas Harta Kekayaan yang diketahuinya atau patut diduga merupakan hasil tindak pidana korupsi, atas nama tersangka RITA WIDYASARI

(Bupati Kutai Kartanegara periode tahun 2010-2015). Sprin.Dik-119/01/12/2017 tanggal 27 Desember 2017.

2. Perkara TPPU sehubungan dengan perbuatan menempatkan, mentransfer, mengalihkan, membelanjakan, membayarkan, menghibahkan, menitipkan, membawa ke luar negeri, mengubah bentuk, menukarkan dengan mata uang atau surat berharga atau perbuatan lain atas Harta Kekayaan yang diketahui atau patut diduga merupakan hasil tindak pidana korupsi dengan tujuan menyembunyikan atau menyamarkan asal usul Harta Kekayaan dan atau menyembunyikan atau menyamarkan asal usul, sumber, lokasi, peruntukan pengalihan hak-hak, atau kepemilikan yang sebenarnya atas Harta Kekayaan yang diketahuinya atau patut diduga merupakan hasil tindak pidana korupsi, atas nama tersangka KHAIRUDIN (Swasta - Komisaris PT. MEDIA BANGUN BERSAMA). Sprin.Dik-120/01/12/2017 tanggal 27 Desember 2017.
3. Perkara TPPU sehubungan dengan perbuatan menempatkan, mentransfer, mengalihkan, membelanjakan, membayarkan, menghibahkan, menitipkan, membawa ke luar negeri, mengubah bentuk, menukarkan dengan mata uang atau surat berharga atau perbuatan lain atas Harta Kekayaan yang diketahui atau patut diduga merupakan hasil tindak pidana korupsi dengan tujuan menyembunyikan atau menyamarkan asal usul Harta Kekayaan dan atau menyembunyikan atau menyamarkan asal usul, sumber, lokasi, peruntukan pengalihan hak-hak, atau kepemilikan yang sebenarnya atas Harta Kekayaan yang diketahuinya atau patut diduga merupakan hasil tindak pidana korupsi, atas nama tersangka TAUFIQURRAHMAN (Bupati Kabupaten Nganjuk). Sprin.Dik-121/01/12/2017 tanggal 27 Desember 2017.

---

## November

1. Perkara TPK sehubungan dengan memberi atau menjanjikan sesuatu terkait Pembahasan Perubahan APBD Pada Dinas Pekerjaan Umum dan Penataan Ruang Pemerintah Kota Mojokerto Tahun Anggaran 2017 atas nama tersangka MAS'UD YUNUS (Walikota Mojokerto).
2. Perkara TPK sehubungan dengan memberi atau menjanjikan sesuatu kepada pegawai negeri atau Penyelenggara Negara dengan maksud untuk mendapatkan Pengesahan RAPBD Propinsi Jambi Tahun Anggaran 2018 atas nama tersangka SAIPUDIN (Asisten Daerah III Bidang Administrasi Umum Provinsi Jambi).
3. Perkara TPK sehubungan dengan memberi atau menjanjikan sesuatu kepada pegawai negeri atau Penyelenggara Negara dengan maksud untuk mendapatkan Pengesahan RAPBD Propinsi Jambi Tahun Anggaran 2018 atas nama tersangka ERWAN MALIK (PLT. Sekda Pemerintah Daerah Provinsi Jambi).
4. Perkara TPK sehubungan dengan memberi atau menjanjikan sesuatu kepada pegawai negeri atau Penyelenggara Negara dengan maksud untuk mendapatkan Pengesahan RAPBD Propinsi

Jambi Tahun Anggaran 2018 atas nama tersangka ARFAN (Plt. Kepala Dinas PUPR Propinsi Jambi).

5. Perkara TPK sehubungan dengan menerima hadiah atau janji dari SAIPUDIN selaku Asisten Daerah III Bidang Administrasi Umum Propinsi Jambi terkait untuk mendapatkan Pengesahan RAPBD Propinsi Jambi Tahun Anggaran 2018 atas nama tersangka SUPRIYONO (Anggota DPRD Propinsi Jambi).

---

## Oktober

1. Perkara TPK sehubungan dengan memberi hadiah atau janji kepada Sudiwardono selaku Hakim pada Pengadilan Tinggi Manado terkait Penanganan upaya hukum banding atas nama Terdakwa Marlina Moha Siahaan dalam perkara tindak pidana korupsi Tunjangan Penghasilan Aparatur Pemerintah Desa (TPAPD) Kabupaten Bolaang Mongondow tahun 2010 atas nama tersangka ADITYA ANUGRAH MOHA (Anggota DPR RI).
2. Perkara TPK sehubungan dengan menerima hadiah atau janji dari Aditya Anugrah Moha, terkait Penanganan upaya hukum banding atas nama Terdakwa Marlina Moha Siahaan dalam perkara tindak pidana korupsi Tunjangan Penghasilan Aparatur Pemerintah Desa (TPAPD) Kabupaten Bolaang Mongondow tahun 2010 atas nama tersangka SUDIWARDONO (Hakim pada Pengadilan Tinggi Manado).
3. Perkara TPK sehubungan dengan menerima hadiah atau janji terkait Mutasi dan Promosi Jabatan di lingkungan Pemerintah Kabupaten Nganjuk, bersama-sama Ibnu Hajar selaku Kepala Dinas Pendidikan dan Kebudayaan Pemerintah Kabupaten Nganjuk dan Suwandi selaku Kepala SMP Negeri 3 Ngronggot Kabupaten Nganjuk atas nama tersangka TAUFIQURRAHMAN (Bupati Nganjuk periode tahun 2013 – 2018).
4. Perkara TPK sehubungan dengan menerima hadiah atau janji terkait Mutasi dan Promosi Jabatan di lingkungan Pemerintah Kabupaten Nganjuk, bersama-sama Taufiqurrahman selaku Bupati Nganjuk periode tahun 2013 – 2018 dan Suwandi selaku Kepala SMP Negeri 3 Ngronggot Kabupaten Nganjuk atas nama tersangka IBNU HAJAR (Kepala Dinas Pendidikan dan Kebudayaan Pemerintah Kabupaten Nganjuk).
5. Perkara TPK sehubungan dengan menerima hadiah atau janji terkait Mutasi dan Promosi Jabatan di lingkungan Pemerintah Kabupaten Nganjuk, bersama-sama Taufiqurrahman selaku Bupati Nganjuk periode tahun 2013 – 2018 dan Ibnu Hajar selaku Kepala Dinas Pendidikan dan Kebudayaan Pemerintah Kabupaten Nganjuk, atas nama tersangka SUWANDI (Kepala SMP Negeri 3 Ngronggot Kabupaten Nganjuk).
6. Perkara TPK sehubungan dengan memberi hadiah atau janji kepada Taufiqurrahman selaku Bupati Nganjuk periode tahun 2013 – 2018 bersama-sama Ibnu Hajar selaku Kepala Dinas Pendidikan dan Kebudayaan Pemerintah Kabupaten Nganjuk dan Suwandi selaku Kepala SMP Negeri 3 Ngronggot Kabupaten Nganjuk terkait Mutasi dan Promosi Jabatan di lingkungan

Pemerintah Kabupaten Nganjuk atas nama tersangka MOKHAMMAD BISRI (Kepala Bagian Umum RSUD Kabupaten Nganjuk).

7. Perkara TPK sehubungan dengan memberi hadiah atau janji kepada Taufiqurrahman selaku Bupati Nganjuk periode tahun 2013 – 2018 bersama-sama Ibnu Hajar selaku Kepala Dinas Pendidikan dan Kebudayaan Pemerintah Kabupaten Nganjuk dan Suwandi selaku Kepala SMP Negeri 3 Ngronggot Kabupaten Nganjuk terkait Mutasi dan Promosi Jabatan di lingkungan Pemerintah Kabupaten Nganjuk, yang diduga dilakukan atas nama tersangka HARJANTO (Kepala Dinas Lingkungan Hidup Pemerintah Kabupaten Nganjuk).
8. Perkara TPK sehubungan dengan menerima gratifikasi yang berhubungan dengan jabatannya dan yang berlawanan dengan kewajiban atau tugasnya atas nama tersangka TAUFIQURRAHMAN (Bupati Nganjuk periode tahun 2013 – 2018).
9. Perkara TPK sehubungan dengan Pengadaan Paket Penerapan Kartu Tanda Penduduk Berbasis Nomor Induk Kependudukan Secara Nasional (KTP Elektronik) Tahun 2011 s.d 2012 pada Kementerian Dalam Negeri Republik Indonesia, bersama-sama dengan Anang Sugiana Sudihardjo, Andi Agustinus alias Andi Narogong, Irman selaku Direktur Jenderal Kependudukan dan Pencatatan Sipil Kementerian Dalam Negeri Republik Indonesia dan Sugiharto selaku Pejabat Pembuat Komitmen (PPK) Direktorat Jenderal Kependudukan dan Pencatatan Sipil Kementerian Dalam Negeri Republik Indonesia dan kawan-kawan atas nama tersangka SETYA NOVANTO (Ketua DPR RI).

---

## September

1. Perkara TPK sehubungan dengan memberi atau menjanjikan sesuatu kepada Sigit Yugoharto selaku Auditor BPK RI dengan maksud supaya pegawai negeri atau penyelenggara negara tersebut berbuat atau tidak berbuat sesuatu dalam jabatannya atau karena berhubungan dengan sesuatu yang bertentangan dengan kewajibannya terkait dengan Pemeriksaan dengan Tujuan Tertentu ( PDTT ) terhadap PT. Jasa Marga ( Persero ) pada tahun 2017 atas nama tersangka SETIA BUDI (General Manager PT. Jasa Marga (Persero)).
2. Perkara TPK sehubungan dengan menerima hadiah atau janji dari Setia Budi selaku General Manager PT Jasa Marga (Persero) padahal diketahui atau patut diduga bahwa hadiah atau janji tersebut diberikan untuk menggerakkan agar melakukan atau tidak melakukan sesuatu dalam jabatannya atau karena telah melakukan atau tidak melakukan sesuatu dalam jabatannya, yang bertentangan dengan kewajibannya terkait dengan Pemeriksaan Dengan Tujuan Tertentu (PDTT) terhadap PT Jasa Marga (Persero) pada tahun 2017 atas nama tersangka SIGIT YUGOHARTO (Auditor BPK RI).
3. Perkara TPK sehubungan dengan memberi hadiah atau janji kepada Suryana selaku Anggota Majelis Hakim Pengadilan Tindak Pidana Korupsi pada Pengadilan Pengadilan Negeri Bengkulu bersama-sama dengan Hendra Kurniawan selaku Panitera Pengganti Pengadilan Tindak Pidana

Korupsi pada Pengadilan Negeri Bengkulu dan kawan-kawan, yang diduga dilakukan oleh Tersangka dan kawan-kawan, sehubungan dengan persidangan perkara Tindak Pidana Korupsi Dana Kegiatan Rutin APBD Tahun Anggaran 2013 s.d 2014 di DPPKAD Kota Bengkulu atas nama Wilson, di Pengadilan Tindak Pidana Korupsi pada Pengadilan Negeri Bengkulu atas nama tersangka SYUHADATUL ISLAMY Alias LEMI (PNS pada Pemkot Bengkulu).

4. Perkara TPK sehubungan dengan menerima hadiah atau janji dari Syuhadatul Islamy Alias Lemi dan kawan-kawan terkait dengan persidangan perkara Tindak Pidana Korupsi Dana Kegiatan Rutin APBD Tahun Anggaran 2013 s.d 2014 di DPPKAD Kota Bengkulu atas nama Terdakwa Wilson, di Pengadilan Tindak Pidana Korupsi pada Pengadilan Negeri Bengkulu atas nama tersangka SURYANA (Anggota Majelis Hakim Pengadilan Tipikor pada Pengadilan Negeri Bengkulu) dan HENDRA KURNIAWAN (Panitera Pengadilan Tipikor pada Pengadilan Negeri Bengkulu).
5. Perkara TPK sehubungan dengan melakukan beberapa perbuatan memberi sesuatu kepada pegawai negeri atau penyelenggara negara Ok. Arya Zulkarnain selaku Bupati Batubara periode 2013 s.d 2018 dan Helman Herdady selaku Kadis PUPR Kabupaten Batubara dan Sujendi Tarsono Alias Ayen untuk mendapatkan proyek pembangunan jembatan Sentang Perbatasan Kel. Labuhan Ruku menuju Desa Sintang dan proyek Jembatan Se Magung Kecamatan Medang Deras di Kabupaten Batubara Tahun Anggaran 2017 atas nama tersangka MARINGAN SITUMORANG (Swasta).
6. Perkara TPK sehubungan dengan memberi sesuatu kepada pegawai negeri atau penyelenggara negara Ok. Arya Zulkarnain selaku Bupati Batubara periode 2013 s.d 2018, Helman Herdady selaku Kadis PUPR Kabupaten Batubara dan Sujendi Tarsono Alias Ayrn karena telah mendapatkan proyek pekerjaan betonisasi Jalan di Kecamatan Talawi Kabupaten Batubara Tahun Anggaran 2017 atas nama tersangka SYAIFUL AZHAR (Swasta).
7. Perkara TPK sehubungan dengan bersama sama dengan ok. Arya zulkarnain selaku Bupati Batubara periode 2013 s.d 2018 dan Sujendi Tarsono alias Ayen terkait penerimaan hadiah atau janji dari Maringin Situmorang untuk mendapatkan proyek pembangunan Jembatan Sentang Perbatasan Kel. Labuhan Ruku menuju Desa Sintang dan Proyek Jembatan Sei Magung Kecamatan Medang Deras di Kabupaten Batubara Tahun Anggaran 2017; dan dari Syaiful Azhar karena telah mendapatkan proyek pekerjaan betonisasi Jalan di Kecamatan Talawi Kabupaten Batubara Tahun Anggaran 2017 atas nama tersangka HELMAN HERDADY (Kadis PUPR Kabupaten Batubara).
8. Perkara TPK sehubungan dengan bersama sama dengan Helman Herdady selaku Kadis PUPR Kabupaten Batubara dan Sujendi Tarsono alias Ayen terkait penerimaan hadiah atau janji dari Maringin Situmorang untuk mendapatkan proyek pembangunan Jembatan Sentang Perbatasan Kel. Labuhan Ruku menuju Desa Sintang dan Proyek Jembatan Sei Magung Kecamatan Medang Deras di Kabupaten Batubara Tahun Anggaran 2017; dan dari Syaiful Azhar karena telah mendapatkan proyek pekerjaan betonisasi Jalan di Kecamatan Talawi Kabupaten

Batubara Tahun Anggaran 2017 atas nama tersangka OK. ARYA ZULKARNAIN (Bupati Batubara periode 2013 s.d 2018).

9. Perkara TPK sehubungan dengan bersama sama dengan Ok. Arya Zulkarnain selaku Bupati Batubara periode 2013 s.d 2018 dan Helman Herdady selaku Kadis PUPR Kabupaten Batubara terkait penerimaan hadiah atau janji dari Maringin Situmorang untuk mendapatkan proyek pembangunan Jembatan Sentang Perbatasan Kel. Labuhan Ruku menuju Desa Sintang dan Proyek Jembatan Sei Magung Kecamatan Medang Deras di Kabupaten Batubara Tahun Anggaran 2017; dan dari Syaiful Azhar karena telah mendapatkan proyek pekerjaan betonisasi Jalan di Kecamatan Talawi Kabupaten Batubara Tahun Anggaran 2017 atas nama tersangka SUJENDI TARSONO Alias AYEN (Swasta).
10. Perkara TPK sehubungan dengan menerima hadiah atau janji padahal diketahui atau patut diduga bahwa hadiah atau janji tersebut diberikan untuk menggerakkan agar melakukan atau tidak melakukan sesuatu dalam jabatannya atau karena telah melakukan atau tidak melakukan sesuatu dalam jabatannya, yang bertentangan dengan kewajibannya terkait dengan Persetujuan penetapan peraturan daerah tentang penambahan penyertaan modal kepada perusahaan daerah air minum Banjarmasin tahun 2017 atas nama tersangka IWAN RUSMALI (Anggota DPRD Banjarmasin).
11. Perkara TPK sehubungan dengan menerima hadiah atau janji padahal diketahui atau patut diduga bahwa hadiah atau janji tersebut diberikan untuk menggerakkan agar melakukan atau tidak melakukan sesuatu dalam jabatannya atau karena telah melakukan atau tidak melakukan sesuatu dalam jabatannya, yang bertentangan dengan kewajibannya terkait dengan Persetujuan Penetapan Peraturan Daerah Tentang Penambahan Penyertaan Modal Kepada Perusahaan Daerah Air Minum Bandarmasih tahun 2017 atas nama tersangka ANDI EFFENDI (Anggota DPRD Banjarmasin dan Ketua Pansus Persetujuan Penetapan Peraturan Daerah).
12. Perkara TPK sehubungan dengan bersama-sama dengan tersangka Trensisi selaku Manager Keuangan PDAM Bandarmasih kota Banjarmasin yaitu memberi atau menjanjikan sesuatu dengan maksud supaya pegawai negeri atau penyelenggara negara tersebut berbuat atau tidak berbuat sesuatu dalam jabatannya atau karena berhubungan dengan sesuatu yang bertentangan dengan kewajibannya terkait dengan Persetujuan Penetapan Peraturan Daerah Tentang Penambahan Penyertaan Modal Kepada Perusahaan Daerah Air Minum Bandarmasih Tahun 2017 atas nama tersangka MUSLIH (Direktur Utama PDAM Bandarmasih Banjarmasin) dan TRENSIS (Manager Keuangan PDAM Bandarmasih Kota Banjarmasin).
13. Perkara TPK sehubungan dengan penerimaan atau janji terkait dengan Pengadaan Barang dan Jasa di lingkungan Pemerintah Kota Batu Tahun Anggaran 2017 atas nama tersangka EDDY RUMPOKO (Walikota Batu).
14. Perkara TPK sehubungan dengan penerimaan hadiah atau janji bersama-sama dengan Eddy Rumpoko selaku Walikota Batu dan kawan-kawan, terkait dengan Pengadaan Barang dan Jasa

di lingkungan Kota Batu Tahun Anggaran 2017. atas nama tersangka EDI SETIAWAN (Kepala Bagian Layanan Pengadaan Pemerintah Kota Batu).

15. Perkara TPK sehubungan dengan pemberian hadiah atau janji kepada Penyelenggara Negara terkait dengan Pengadaan Barang dan Jasa di lingkungan Pemerintah Kota Batu Tahun Anggaran 2017. atas nama tersangka FILIPUS DJAP (Swasta).
16. Perkara TPK sehubungan dengan menerima hadiah atau janji dari Hery Susanto Gun selaku Direktur Utama PT SAWIT GOLDEN PRIMA terkait Pemberian Izin Lokasi untuk Keperluan Inti dan Plasma Perkebunan Kelapa Sawit di Desa Kupang Baru Kecamatan Muara Kaman kepada PT SAWIT GOLDEN PRIMA atas nama tersangka RITA WIDYASARI (Bupati Kutai Kartanegara periode tahun 2010-2015).
17. Perkara TPK sehubungan dengan memberi hadiah atau janji kepada Rita Widyasari selaku Bupati Kutai Kartanegara periode tahun 2010–2015 terkait Pemberian Ijin Lokasi untuk Keperluan Inti dan Plasma Perkebunan Kelapa Sawit di Desa Kupang Baru Kecamatan Muara Kaman kepada PT SAWIT GOLDEN PRIMA. atas nama tersangka HERY SUSANTO GUN (Direktur Utama PT. Sawit Golden Prima).
18. Perkara TPK sehubungan dengan bersama-sama KHAIRUDIN selaku Komisaris PT MEDIA BANGUN BERSAMA, yaitu menerima gratifikasi yang berhubungan dengan jabatannya dan yang berlawanan dengan kewajiban atau tugasnya atas nama tersangka RITA WIDYASARI (Bupati Kutai Kartanegara periode tahun 2010-2015).
19. Perkara TPK sehubungan dengan bersama-sama Rita Widyasari selaku Bupati Kutai Kartanegara periode tahun 2010–2015 dan periode 2016-2021, yaitu menerima gratifikasi yang berhubungan dengan jabatannya dan yang berlawanan dengan kewajiban atau tugasnya atas nama tersangka KHAIRUDIN (Komisaris PT. MEDIA BANGUN BERSAMA).
20. Perkara TPK sehubungan dengan secara bersama-sama memberi atau menjanjikan sesuatu kepada pegawai negeri atau penyelenggara negara dengan maksud supaya pegawai negeri atau penyelenggara negara tersebut berbuat atau tidak berbuat sesuatu dalam jabatannya, yang bertentangan dengan kewajibannya terkait dengan Pengurusan Perizinan untuk Pembangunan Mall Transmart di Cilegon atas nama tersangka TUBAGUS DONY SUGIHMUKTI (Direktur Utama PT. KIEC (Krakatau Industrial Estate Cilegon )).
21. Perkara TPK sehubungan dengan secara bersama-sama memberi atau menjanjikan sesuatu kepada pegawai negeri atau penyelenggara negara dengan maksud supaya pegawai negeri atau penyelenggara negara tersebut berbuat atau tidak berbuat sesuatu dalam jabatannya, yang bertentangan dengan kewajibannya terkait dengan Pengurusan Perizinan untuk Pembangunan Mall Transmart di Cilegon atas nama tersangka EKA WANDORO (Karyawan PT. KIEC (Krakatau Industrial Estate Cilegon )).
22. Perkara TPK sehubungan dengan secara bersama-sama memberi atau menjanjikan sesuatu kepada pegawai negeri atau penyelenggara negara dengan maksud supaya pegawai negeri atau penyelenggara negara tersebut berbuat atau tidak berbuat sesuatu dalam jabatannya,

- yang bertentangan dengan kewajibannya terkait dengan Pengurusan Perizinan untuk Pembangunan Mall Transmart di Cilegon atas nama tersangka BAYU DWINANTO UTOMO (Pegawai BUMN ( PT. Brantas Abipraya )).
23. Perkara TPK sehubungan dengan menerima pemberian hadiah atau janji terkait dengan pengurusan perijinan pembangunan Mall Transmart di Cilegon atas nama tersangka TUBAGUS IMAN ARIYADI (Walikota Cilegon).
24. Perkara TPK sehubungan dengan turut serta atau bersama-sama dengan TUBAGUS IMAN ARIYADI selaku Walikota Cilegon, menerima pemberian hadiah atau janji terkait dengan pengurusan perijinan pembangunan Mall Transmart di Cilegon atas nama tersangka AKHMAD DITA PRAWIRA (PNS/ Kepala Dinas Penanaman Modal Pelayanan Terpadu Satu Pintu (DPM PTSP) Kota Cilegon).
25. Perkara TPK sehubungan dengan turut serta atau bersama-sama dengan Tubagus Iman Ariyadi selaku Walikota Cilegon, menerima pemberian hadiah atau janji terkait dengan pengurusan perijinan pembangunan Mall Transmart di Cilegon atas nama tersangka HENDRI (Swasta).
26. Perkara TPK sehubungan dengan pengadaan Paket Penerapan Kartu Tanda Penduduk Berbasis Nomor Induk Kependudukan Secara Nasional (KTP Elektronik) Tahun 2011 s.d 2012 pada Kementerian Dalam Negeri Republik Indonesia, bersama-sama dengan Setya Novanto, Andi Agustinus alias Andi Narogong, Irman selaku Direktur Jenderal Kependudukan dan Pencatatan Sipil Kementerian Dalam Negeri Republik Indonesia dan Sugiharto selaku Pejabat Pembuat Komitmen (PPK) Direktorat Jenderal Kependudukan dan Pencatatan Sipil Kementerian Dalam Negeri Republik Indonesia dan kawan-kawan atas nama tersangka ANANG SUGIANA SUDIHARDJO (Swasta).
- 

## **Agustus**

1. Perkara TPK sehubungan dengan perbuatan turut serta memberi sesuatu kepada pegawai negeri atau penyelenggara negara Rudi Indra Prasetya selaku Kajari Pamekasan terkait kegiatan pengumpulan keterangan dan data atas dugaan penyelewengan Dana Desa di Desa Dasok Kecamatan Pademawu Kabupaten Pamekasan, bersama-sama dengan Achmad Syafii selaku Bupati Pamekasan, Sutjipto Utomo, dan Agus Mulyadi, atas nama tersangka NOER SALEHHODDIN alias MARGONO (Kasubag Umum dan Kepegawaian Inspektorat Kabupaten Pamekasan, Propinsi Jawa Timur). Sprin.Dik-61/01/08/2017 Tanggal 03 Agustus 2017.
2. Perkara TPK sehubungan dengan perbuatan turut serta memberi sesuatu kepada pegawai negeri atau penyelenggara negara RUDI INDRA PRASETYA selaku Kajari Pamekasan terkait kegiatan pengumpulan keterangan dan data atas dugaan penyelewengan Dana Desa di Desa Dasok Kecamatan Pademawu Kabupaten Pamekasan, bersama-sama dengan Achmad Syafii selaku Bupati Pamekasan dan Noer Salehhoddin alias Margono, atas nama tersangka



- SUTJIPTO UTOMO (Kepala Inspektorat Kabupaten Pamekasan, Propinsi Jawa Timur) dan AGUS MULYADI (Kepala Desa Dasok). Sprin.Dik-62/01/08/2017 Tanggal 03 Agustus 2017.
3. Perkara TPK sehubungan dengan perbuatan turut serta memberi sesuatu kepada pegawai negeri atau penyelenggara negara RUDI INDRA PRASETYA selaku Kajari Pamekasan terkait kegiatan pengumpulan keterangan dan data atas dugaan penyelewengan Dana Desa di Desa Dasok Kecamatan Pademawu Kabupaten Pamekasan, bersama-sama dengan NOER SALEHHODDIN alias MARGONO atas nama tersangka ACHMAD SYAFII (Bupati Pamekasan). Sprin.Dik-63/01/08/2017 Tanggal 03 Agustus 2017.
  4. Perkara TPK sehubungan dengan penerimaan hadiah atau janji yang diberikan oleh Achmad Syafii selaku Bupati Pamekasan, Sutjipto Utomo, Agus Mulyadi, dan Noer Salehhoddin alias MARGONO terkait kegiatan pengumpulan keterangan dan data atas dugaan penyelewengan Dana Desa di Desa Dasok Kecamatan Pademawu, Kabupaten Pamekasan atas nama tersangka RUDI INDRA PRASETYA (Kajari Pamekasan). Sprin.Dik-64/01/08/2017 Tanggal 03 Agustus 2017.
  5. Perkara TPK sehubungan dengan menerima hadiah atau janji terkait Pembahasan APBD-P Pemerintah Kota Malang Tahun Anggaran 2015 dari Dr. Ir. Drs. JAROT EDY SULISTİYONO, M.Si. selaku Kepala Dinas Pekerjaan Umum Perumahan dan Pengawasan Bangunan (PUPPB) Pemerintah Kota Malang tahun 2015 dan kawan-kawan atas nama tersangka MOCH. ARIEF WICAKSONO (Ketua DPRD Malang Periode 2014-2019). Sprin.Dik-65/01/08/2017 Tanggal 03 Agustus 2017.
  6. Perkara TPK sehubungan dengan memberi hadiah atau janji terkait Pembahasan APBD-P Pemerintah Kota Malang Tahun Anggaran 2015 kepada MOCH. ARIEF WICAKSONO, S.T. selaku Ketua DPRD Kota Malang Periode 2014-2019 atas nama tersangka JAROT EDY SULISTİYONO (Kepala Dinas Pekerjaan Umum Perumahan dan Pengawasan Bangunan (PUPPB) Pemerintah Kota Malang tahun 2015). Sprin.Dik-66/01/08/2017 Tanggal 03 Agustus 2017.
  7. Perkara TPK sehubungan dengan menerima hadiah atau janji terkait penganggaran kembali proyek Pembangunan Jembatan Kedungkandang dalam APBD Pemerintah Kota Malang Tahun Anggaran 2016 pada tahun 2015 dari HENDRAWAN MARUSZAMA selaku komisaris PT. ENFYS NUSANTARA KARYA atas nama tersangka MOCH. ARIEF WICAKSONO (Ketua DPRD Malang Periode 2014-2019). Sprin.Dik-67/01/08/2017 Tanggal 03 Agustus 2017.
  8. Perkara TPK sehubungan memberi hadiah atau janji terkait penganggaran kembali proyek Pembangunan Jembatan Kedungkandang dalam APBD Pemerintah Kota Malang Tahun Anggaran 2016 pada Tahun 2015 kepada MOCH. ARIEF WICAKSONO, S.T. selaku Ketua DPRD Kota Malang Periode 2014-2019 atas nama tersangka HENDARWAN MARUSZAMA (Komisaris PT. Enyfes Nusantara Karya). Sprin.Dik-68/01/08/2017 Tanggal 03 Agustus 2017.
  9. Perkara TPK sehubungan dengan bersama sama dengan Ir. YUSUF NAFIK selaku Direktur Utama PT AQUAMARINE DIVINDO INSPECTION, yaitu memberi hadiah atau janji kepada TARMIZI, SH, MH selaku Panitera Pengganti pada Pengadilan Negeri Jakarta Selatan terkait

perkara perdata No. 688/Pdt.G/2016/PN. Jkt. Selatan tentang Wanprestasi Kerjasama Pemasangan Rantai di Kapal antara PT. EASTERN JASON FABRICATION selaku penggugat dengan PT AQUAMARINE DIVINDO INSPECTION selaku tergugat atas nama tersangka AKHMAD ZAINI (Kuasa Hukum PT Aquamarine Divindo Inspection). Sprin.Dik-69/01/08/2017 Tanggal 22 Agustus 2017.

10. Perkara TPK sehubungan dengan bersama sama dengan AKHMAD ZAINI, SH selaku Kuasa Hukum PT AQUAMARINE DIVINDO INSPECTION, yaitu memberi hadiah atau janji kepada TARMIZI, SH, MH selaku Panitera Pengganti pada Pengadilan Negeri Jakarta Selatan terkait perkara perdata No. 688/Pdt.G/2016/PN. Jkt. Selatan tentang Wanprestasi Kerjasama Pemasangan Rantai di Kapal antara PT. EASTERN JASON FABRICATION selaku penggugat dengan PT AQUAMARINE DIVINDO INSPECTION selaku tergugat atas nama tersangka YUNUS NAFIK (Direktur Utama PT. Aquamarine Divindo Inspection). Sprin.Dik-70/01/08/2017 Tanggal 22 Agustus 2017.
11. Perkara TPK sehubungan dengan menerima hadiah atau janji dari Akhmad Zaini, SH selaku Kuasa Hukum PT AQUAMARINE DIVINDO INSPECTION bersama-sama dengan Ir. YUNUS NAFIK selaku Direktur Utama PT. AQUAMARINE DIVINDO INSPECTION terkait perkara perdata No. 688/Pdt.G/2016/PN. Jkt. Selatan tentang Wanprestasi Kerjasama Pemasangan Rantai di Kapal antara PT. EASTERN JASON FABRICATION selaku penggugat dengan PT AQUAMARINE DIVINDO INSPECTION selaku tergugat atas nama tersangka TARMIZI (Panitera Pengganti pada Pengadilan Negeri Jakarta Selatan). Sprin.Dik-71/01/08/2017 Tanggal 22 Agustus 2017.
12. Perkara TPK sehubungan dengan memberi hadiah atau janji terkait perijinan dan pengadaan proyek-proyek barang dan jasa di lingkungan Direktorat Jenderal Perhubungan Laut Tahun Anggaran 2016-2017 atas nama tersangka ADIPUTRA KURNIAWAN (Komisaris PT. Adiguna Keruktama). Sprin.Dik-72/01/08/2017 Tanggal 24 Agustus 2017.
13. Perkara TPK sehubungan dengan menerima hadiah atau janji terkait perijinan dan pengadaan proyek-proyek barang dan jasa di lingkungan Direktorat Jenderal Perhubungan Laut Tahun Anggaran 2016-2017 atas nama tersangka ANTONIUS TONNY BUDIONO (Direktur Jenderal Perhubungan Laut). Sprin.Dik-73/01/08/2017 Tanggal 22 Agustus 2017.
14. Perkara TPPU sehubungan dengan perbuatan setiap orang menempatkan, mentransfer, mengalihkan, membelanjakan, membayarkan, menghibahkan, menitipkan, membawa ke luar negeri, mengubah bentuk, menukarkan dengan mata uang atau surat berharga atau perbuatan lain atas harta kekayaan yang diketahuinya atau patut diduganya merupakan hasil tindak pidana dengan tujuan menyembunyikan atau menyamarkan asal usul harta kekayaan, yang diduga dilakukan oleh tersangka Ali Sadli selaku Sub Auditorat III.B2 Badan Pemeriksa Keuangan Republik Indonesia atas nama tersangka ALI SADLI (Kepala Sub Auditorat III.B.2 Badan Pemeriksa Keuangan). Sprin.Dik-74/01/08/2017 Tanggal 28 Agustus 2017.
15. Perkara TPPU sehubungan dengan perbuatan setiap orang menempatkan, mentransfer, mengalihkan, membelanjakan, membayarkan, menghibahkan, menitipkan, membawa ke luar

negeri, mengubah bentuk, menukarkan dengan mata uang atau surat berharga atau perbuatan lain atas harta kekayaan yang diketahuinya atau patut diduganya merupakan hasil tindak pidana dengan tujuan menyembunyikan atau menyamarkan asal usul harta kekayaan, yang diduga dilakukan oleh tersangka Ali Sadli selaku Sub Auditorat III.B2 Badan Pemeriksa Keuangan Republik Indonesia atas nama tersangka ROCHMADI SAPTOGIRI (Auditor Utama AKN 3 Badan Pemeriksa Keuangan Republik Indonesia). Sprin.Dik-75/01/08/2017 Tanggal 28 Agustus 2017.

16. Perkara TPK sehubungan dengan penerimaan hadiah atau janji terkait dengan Pengelolaan Dana Jasa Pelayanan RSUD Kardinah Kota Tegal Tahun 2017 dan Pengadaan Barang dan Jasa di lingkungan Kota Tegal Tahun Anggaran 2017 atas nama tersangka SITI MASHITA SOEPARNO (Wali Kota Tegal). Sprin.Dik-76/01/08/2017 Tanggal 30 Agustus 2017.
17. Perkara TPK sehubungan dengan penerimaan hadiah atau janji bersama-sama dengan SITI MASHITA SOEPARNO selaku Wali Kota Tegal dan kawan-kawan terkait dengan Pengelolaan Dana Jasa Pelayanan RSUD Kardinah Kota Tegal Tahun 2017 dan Pengadaan Barang dan Jasa di lingkungan Kota Tegal Tahun Anggaran 2017 atas nama tersangka AMIR MIRZA HUTAGALUNG (Swasta). Sprin.Dik-77/01/08/2017 Tanggal 30 Agustus 2017.
18. Perkara TPK sehubungan dengan pemberian hadiah atau janji kepada Penyelenggara Negara terkait dengan Pengelolaan Dana Jasa Layanan RSUD Kardinah Kota Tegal Tahun 2017 atas nama tersangka CAHYO SUPRIADI (Wakil Direktur Umum dan Keuangan Rumah Sakit Umum Daerah Kardinah Kota Tegal). Sprin.Dik-78/01/08/2017 Tanggal 30 Agustus 2017.

---

## Juli

1. Perkara TPK sehubungan dengan Pekerjaan Pembangunan Rumah Sakit Pendidikan Khusus Penyakit Infeksi dan Pariwisata Universitas Udayana Tahun Anggaran 2009 s.d 2010 atas nama tersangka PT. DUTA GRAHA INDAH. Tbk (yang telah berubah nama menjadi PT. Nusa Konstruksi Enjineering, Tbk.). Sprin.Dik-52/01/06/2017 Tanggal 5 Juli 2017.
2. Perkara TPK sehubungan dengan menerima hadiah atau janji dari Suramlan dan kawan-kawan bersama-sama dengan Sri Hartini selaku Bupati Klaten periode 2016 - 2021 terkait Pengisian Perangkat Daerah serta promosi dan mutasi Kepala SMP di lingkungan Pemerintah Kabupaten Klaten tahun 2016 atas nama tersangka BAMBANG TEGUH SETYO (Kabid SD). Sprin.Dik-53/01/07/2017 Tanggal 7 Juli 2017.
3. Perkara TPK sehubungan dengan menerima hadiah atau janji bersama-sama dengan Sri Hartini selaku Bupati Klaten periode 2016 - 2021 terkait dengan proyek di Dinas Pendidikan Pemerintah Kabupaten Klaten Tahun Anggaran 2016 atas nama tersangka SUDIRNO (Sekretaris Dinas Pendidikan Klaten). Sprin.Dik-54/01/07/2017 Tanggal 7 Juli 2017.
4. Perkara TPK sehubungan dengan Pengadaan paket penerapan Kartu Tanda Penduduk berbasis nomor induk kependudukan secara nasional (KTP Elektronik) tahun 2011 s/d 2013 pada

- Kementerian Dalam Negeri Republik Indonesia atas nama tersangka MARKUS NARI (Anggota DPR RI Periode 2014-2019). Sprin.Dik-55/01/07/2017 Tanggal 12 Juli 2017.
5. Perkara TPK sehubungan dengan Pengadaan Paket Penerapan Kartu Tanda Penduduk Berbasis Nomor Induk Kependudukan Secara Nasional (KTP Elektronik) Tahun 2011 s.d 2012 pada Kementerian Dalam Negeri Republik Indonesia bersama-sama dengan Andi Agustinus alias Andi Narogong dan Irman selaku Direktur Jenderal Kependudukan dan Pencatatan Sipil Kementerian Dalam Negeri Republik Indonesia dan Sugiharto selaku Pejabat Pembuat Komitmen (PPK) Direktorat Jenderal Kependudukan dan Pencatatan Sipil Kementerian Dalam Negeri Republik Indonesia atas nama tersangka SETYA NOVANTO (Ketua DPR). Sprin.Dik-56/01/07/2017 Tanggal 17 Juli 2017.
  6. Perkara TPK sehubungan dengan Proyek Peningkatan Jalan Batu Panjang – Pangkalan Nyirih di Kabupaten Bengkalis Propinsi Riau Tahun Anggaran 2013 s.d. Tahun Anggaran 2015 atas nama tersangka MUHAMMAD NASIR (Sekretaris Daerah Pemko Dumai Riau). Sprin.Dik-57/01/07/2017 Tanggal 19 Juli 2017.
  7. Perkara TPK sehubungan dengan Proyek Peningkatan Jalan Batu Panjang – Pangkalan Nyirih di Kabupaten Bengkalis Propinsi Riau Tahun Anggaran 2013 s.d. Tahun Anggaran 2015 atas nama tersangka HOBBY SIREGAR (Direktur Utama PT. Mawatindo Road Construction – Swata). Sprin.Dik-58/01/07/2017 Tanggal 19 Juli 2017.
  8. Perkara TPK sehubungan dengan Pemberian Izin Kuasa Pertambangan Eksplorasi dan Izin Kuasa Pertambangan Eksploitasi serta Izin Usaha Pertambangan Eksplorasi dan Izin Usaha Pertambangan Operasi Produksi dari Pemerintah Kabupaten Konawe Utara kepada Perusahaan Pertambangan di Wilayah Kabupaten Konawe Utara Tahun 2007-2014 atas nama tersangka ASWAD SULAIMAN (Pj. Bupati Konawe Utara (Periode 2007-2009) dan selaku Bupati Konawe Utara (Periode 2011-2016)). Sprin.Dik-59/01/07/2017 Tanggal 27 Juli 2017.
  9. Perkara TPK sehubungan dengan menerima hadiah atau janji terkait fungsi pengawasan dan pemantauan oleh Dewan Perwakilan Rakyat Daerah Provinsi Jawa Timur terhadap pelaksanaan Peraturan Daerah dan Penggunaan Anggaran di Provinsi Jawa Timur Tahun Anggaran 2016-2017 atas nama tersangka MOH KABIL MUBAROK (Anggota DPRD Prov. Jatim). Sprin.Dik-60/01/07/2017 Tanggal 27 Juli 2017.
- 

## **Juni**

1. Perkara TPK memberi hadiah atau janji terkait dengan fungsi pengawasan dan pemantauan oleh DPRD Provinsi Jawa Timur terhadap pelaksanaan peraturan daerah dan penggunaan anggaran di provinsi jawa timur tahun anggaran 2016 – 2017 atas nama tersangka BAMBANG HERYANTO (Kadis Pertanian Provinsi Jawa Timur) dan ANANG BASUKI (PNS Dinas Pertanian Provinsi Jawa Timur). Sprin.Dik-35/01/06/2017 Tanggal 6 Juni 2017.

2. Perkara TPK memberi hadiah atau janji terkait dengan fungsi pengawasan dan pemantauan oleh DPRD Provinsi Jawa Timur terhadap pelaksanaan peraturan daerah dan penggunaan anggaran di provinsi jawa timur tahun anggaran 2016 – 2017 atas nama tersangka ROHAYATI (Kadis Peternakan Provinsi Jawa Timur) dkk. Sprin.Dik-36/01/06/2017 Tanggal 6 Juni 2017.
3. Perkara TPK memberi hadiah atau janji terkait dengan fungsi pengawasan dan pemantauan oleh DPRD Provinsi Jawa Timur terhadap pelaksanaan peraturan daerah dan penggunaan anggaran di provinsi jawa timur tahun anggaran 2016 – 2017 atas nama tersangka MOCHAMAD BASUKI (Ketua Komisi B DPRD Provinsi Jawa Timur), SANTOSO dan R. RAHMAN AGUNG (Staf Sekretariat DPRD Provinsi Jawa Timur) dkk. Sprin.Dik-37/01/06/2017 Tanggal 6 Juni 2017.
4. Perkara TPK bersama-sama dengan Saiful Anwar selaku Direktur Design dan Teknologi merangkap Direktur Keuangan PT. PAL Indonesia (persero) dan M. Firmansyah Arifin selaku Direktur Utama PT. PAL Indonesia (persero), yaitu menerima gratifikasi yang berhubungan dengan jabatannya dan yang berlawanan dengan kewenangan atau tugasnya atas nama tersangka ARIF CAHYANA (Kadiv Perbendaharaan PT. PAL Indonesia (persero)). Sprin.Dik-38/01/06/2017 Tanggal 8 Juni 2017.
5. Perkara TPK bersama-sama dengan M. Firmansyah Arifin selaku Direktur Utama PT. PAL Indonesia (persero) dan Arif Cahyana (Kadiv Perbendaharaan PT. PAL Indonesia (persero), yaitu menerima gratifikasi yang berhubungan dengan jabatannya dan yang berlawanan dengan kewenangan atau tugasnya atas nama tersangka SAIFUL ANWAR (Direktur Design dan Teknologi merangkap Direktur Keuangan PT. PAL Indonesia (persero)). Sprin.Dik-39/01/06/2017 Tanggal 8 Juni 2017.
6. Perkara TPK bersama-sama dengan Saiful Anwar selaku Direktur Desain dan Teknologi merangkap Direktur Keuangan PT. PAL Indonesia (persero) dan Arif Cahyana selaku Kadiv Perbendaharaan PT. PAL Indonesia (persero), yaitu menerima gratifikasi yang berhubungan dengan jabatannya dan yang berlawanan dengan kewenangan atau tugasnya atas nama tersangka M. FIRMANSYAH ARIFIN (Direktur Utama PT. PAL Indonesia (persero).
7. Perkara TPK bersama-sama dengan Agus Nugroho selaku Direktur Umum PT Pirusa Sejati, yaitu memberi hadiah atau janji terkait dengan penunjukan Ashanti Sales Inc. sebagai agen eksklusif PT. PAL Indonesia (persero) dalam pengadaan kapal SSV untuk pemerintah Filipina Tahun 2014 s.d. 2017 kepada Arif Cahyana selaku Kadiv Perbendaharaan PT. PAL Indonesia (persero) bersama-sama dengan M. Firmansyah Arifin selaku Direktur Utama PT. PAL Indonesia (persero) dan Saiful Anwar selaku Direktur Desain dan Teknologi merangkap Direktur Keuangan PT. PAL Indonesia (persero) atas nama tersangka KIRANA KOTAMA.
8. Perkara TPK memberi hadiah atau janji kepada Parlin Purba selaku Kepala Seksi III Intelegen Kejaksaan Tinggi Bengkulu dkk terkait dengan pengumpulan data atau bahan keterangan atas pelaksanaan proyek-proyek di Balai Wilayah Sungai Sumatera VII Provinsi Bengkulu Tahun

- Anggaran 2015 dan 2016 atas nama tersangka AMIN ANWARI (PPK Balai Wilayah Sungai Sumatera VIII) dan MURNI SUHARDI (swasta).
9. Perkara TPK bersama-sama menerima hadiah atau janji terkait dengan pengumpulan data atau bahan keterangan atas pelaksanaan proyek-proyek di Balai Wilayah Sungai Sumatera VII Provinsi Bengkulu Tahun Anggaran 2015 dan 2016 atas nama tersangka PARLIN PURBA (Kepala Seksi III Intelijen Kejaksaan Tinggi Bengkulu).
  10. Perkara TPK setiap orang yang secara melawan hukum melakukan perbuatan memperkaya diri sendiri atau orang lain atau suatu korporasi yang dapat merugikan keuangan negara atau perekonomian negara terkait dengan pengadaan Helikopter Angkut AW-101 di TNI Angkatan Udara Tahun 2016-2017 atas nama tersangka IRFAN KURNIA SALEH (Direktur PT. Diratama Jaya Mandiri).
  11. Perkara TPK menerima hadiah atau janji terkait Pembahasan Perubahan APBD pada Dinas Pekerjaan Umum dan Penataan Ruang Pemerintah Kota Mojokerto Tahun Anggaran 2017 atas nama tersangka UMAR FARUQ (Wakil Ketua DPRD Kota Mojokerto).
  12. Perkara TPK menerima hadiah atau janji terkait Pembahasan Perubahan APBD pada Dinas Pekerjaan Umum dan Penataan Ruang Pemerintah Kota Mojokerto Tahun Anggaran 2017 atas nama tersangka PURNOMO (Ketua DPRD Kota Mojokerto).
  13. Perkara TPK menerima hadiah atau janji terkait Pembahasan Perubahan APBD pada Dinas Pekerjaan Umum dan Penataan Ruang Pemerintah Kota Mojokerto Tahun Anggaran 2017 atas nama tersangka ABDULLAH FANANI (Wakil Ketua DPRD Kota Mojokerto).
  14. Perkara TPK menerima hadiah atau janji terkait Pembahasan Perubahan APBD pada Dinas Pekerjaan Umum dan Penataan Ruang Pemerintah Kota Mojokerto Tahun Anggaran 2017 atas nama tersangka WIWIET FEBRYANTO (Kepala Dinas Pekerjaan Umum dan Penataan Ruang Kota Mojokerto).
  15. Perkara TPK menerima hadiah atau janji dari Jhony Wijaya dkk terkait proyek-proyek di Lingkungan Pemerintah Provinsi Bengkulu Tahun Anggaran 2017 atas nama tersangka RIDWAN MUKTI (Gubernur Provinsi Bengkulu periode 2016-2021) dan LILY MARTIANI MADDARI (swasta).
  16. Perkara TPK bersama-sama dengan Ridwan Mukti dan Lily Martiani Maddari yaitu menerima hadiah atau janji dari Jhony Wijaya dkk terkait proyek-proyek di Lingkungan Pemerintah Provinsi Bengkulu Tahun Anggaran 2017 atas nama tersangka RICO DIANSARI (swasta).
  17. Perkara TPK memberi hadiah atau janji kepada Ridwan Mukti selaku Gubernur Provinsi Bengkulu periode 2016-2021 dan Lily Martiani Maddari terkait dengan proyek-proyek di Lingkungan Pemerintah Provinsi Bengkulu Tahun Anggaran 2017 atas nama tersangka JHONI WIJAYA (swasta).

1. Perkara TPK setiap orang yang secara bersama-sama memberi atau menjanjikan sesuatu kepada pegawai negeri atau penyelenggara negara dengan maksud supaya pegawai negeri atau penyelenggara negara tersebut berbuat atau tidak berbuat sesuatu dalam jabatannya, yang bertentangan dengan kewajibannya terkait dengan Pemeriksaan Badan Pemeriksa Keuangan Republik Indonesia (BPK-RI) atas Laporan Keuangan Kementerian Desa, Pembangunan Daerah Tertinggal dan Transmigrasi Tahun Anggaran 2016 atas nama tersangka SUGITO (Inspektur Jenderal Kementrian Desa, Pembangunan Daerah Tertinggal dan Transmigrasi). Sprin.Dik-29/01/04/2017 Tanggal 18 April 2017.
  2. Perkara TPK setiap orang yang secara bersama-sama memberi atau menjanjikan sesuatu kepada pegawai negeri atau penyelenggara negara dengan maksud supaya pegawai negeri atau penyelenggara negara tersebut berbuat atau tidak berbuat sesuatu dalam jabatannya, yang bertentangan dengan kewajibannya terkait dengan Pemeriksaan Badan Pemeriksa Keuangan Republik Indonesia (BPK-RI) atas Laporan Keuangan Kementerian Desa, Pembangunan Daerah Tertinggal dan Transmigrasi Tahun Anggaran 2016 atas nama tersangka JAROT BUDI PRABOWO (Kepala Bagian TU dan Keuangan Itjen Kemendes PDTT). Sprin.Dik-31/01/05/2017 Tanggal 27 Mei 017.
  3. Perkara TPK setiap orang yang secara bersama-sama memberi atau menjanjikan sesuatu kepada pegawai negeri atau penyelenggara negara dengan maksud supaya pegawai negeri atau penyelenggara negara tersebut berbuat atau tidak berbuat sesuatu dalam jabatannya, yang bertentangan dengan kewajibannya terkait dengan Pemeriksaan Badan Pemeriksa Keuangan Republik Indonesia (BPK-RI) atas Laporan Keuangan Kementerian Desa, Pembangunan Daerah Tertinggal dan Transmigrasi Tahun Anggaran 2016 atas nama tersangka ROCHMADI SAPTOGIRI (Auditor Utama AKN 3 Badan Pemeriksa Keuangan Republik Indonesia). Sprin.Dik-32/01/05/2017 Tanggal 27 Mei 017.
  4. Perkara TPK penyelenggara negara yang secara bersama-sama menerima hadiah atau janji tersebut diberikan untuk menggerakkan agar melakukan atau tidak melakukan sesuatu dalam jabatannya yang bertentangan dengan kewajibannya terkait dengan Pemeriksaan Badan Pemeriksa Keuangan Republik Indonesia (BPK-RI) atas Laporan Keuangan Kementerian Desa, Pembangunan Daerah Tertinggal dan Transmigrasi Tahun Anggaran 2016 atas nama tersangka ALI SADLI (Kepala Sub Auditorat III.B.2 Badan Pemeriksa Keuangan). Sprin.Dik-33/01/05/2017 Tanggal 27 Mei 017.
  5. Perkara TPK yaitu dengan sengaja mencegah, merintangai atau menggagalkan secara langsung atau tidak langsung pemeriksaan di sidang pengadilan dalam persidangan perkara tindak pidana korupsi atas nama terdakwa Irman dan Sugiharto pada Pengadilan Tindak Pidana Korupsi pada Pengadilan Negeri Jakarta Pusat dan Penyidikan Tindak Pidana Korupsi terhadap Tersangka Miryam S. Haryani, atas nama tersangka MARKUS NARI (Anggota DPR RI Periode 2014-2019). Sprin.Dik-34/01/05/2017 Tanggal 30 Mei 2018.
-

## April

1. Perkara TPK yaitu dengan sengaja tidak memberikan keterangan atau memberikan keterangan yang tidak benar dalam persidangan perkara Tindak Pidana Korupsi atas nama Terdakwa Irman dan Sugiharto pada pengadilan Tindak Pidana Korupsi pada Pengadilan Negeri Jakarta Pusat atas nama tersangka MIRYAM S. HARYANI (Anggota DPR-RI Komisi II). Sprin.Dik-28/01/04/2017 Tanggal 05 April 2017.
  2. Perkara TPK menerima hadiah atau janji terkait dengan pengurusan anggaran dan atau pengadaan barang/jasa di Kementerian Agama RI T.A. 2011-2012 atas nama tersangka FAHD EL FOUZ (swasta). Sprin.Dik-29/01/04/2017 Tanggal 18 April 2017.
- 

## Maret

1. Perkara TPK secara bersama-sama dengan Sigit Widodo dan Yudhy Tri Hartanto serta Adi Pandoyo menerima hadiah atau janji dari Basikun Suwandin Atmojo alias Petruk dan Hartoyo terkait pembahasan dan pengesahan anggaran proyek di Dinas Pendidikan dan Olahraga (Dikpora) dalam APBD-P Kabupaten Kebumen TA 2016 atas nama tersangka DIAN LESTARI SUBEKTI PERTIWI (Anggota DPRD Kabupaten Kebumen). Sprin.Dik-17/01/03/2017 Tanggal 14 Maret 2017.
2. Perkara TPK dalam pengadaan pekerjaan peningkatan Jalan Kemiri-Depapre (112) 24 KM (DAK) di Kabupaten Jayapura dengan Sumber Dana APBD-P Pemerintah Provinsi Papua Tahun Anggaran 2015 atas nama tersangka DAVID MANIBUI (Pemegang Saham Mayoritas PT Bintuni Energy Persada (PT BEP) - Swasta). Sprin.Dik-18/01/03/2017 Tanggal 20 Maret 2017.
3. Perkara TPK dalam pemberian Surat Pemenuhan Kewajiban Pemegang Saham/ Surat Keterangan Lunas (SKL) kepada Sjamsul Nursalim selaku Pemegang Saham Pengendali Bank Dagang Negara Indonesia (BDNI) pada tahun 2004 sehubungan dengan pemenuhan kewajiban penyerahan aset oleh Obligor Bantuan Likuiditas Bank Indonesia (BLBI) kepada Badan Penyehatan Perbankan Nasional (BPPN) atas nama tersangka SYAFRUDDIN ARSYAD TUMENGGUNG (Ketua BPPN). Sprin.Dik-19/01/03/2017 Tanggal 20 Maret 2017.
4. Perkara TPK pengadaan Paket Penerapan Kartu Tanda Penduduk Berbasis Nomor Induk Kependudukan Secara Nasional (KTP Elektronik) Tahun 2011 s.d 2012 pada Kementerian Dalam negeri Republik Indonesia atas nama tersangka ANDI AGUSTINUS (Direktur PT. Cahaya Wijaya Kusuma - Swasta). Sprin.Dik-20/01/03/2017 Tanggal 21 Maret 2017.
5. Perkara TPK setiap orang yang secara melawan hukum melakukan perbuatan memperkaya diri sendiri atau orang lain atau suatu korporasi yang dapat merugikan keuangan negara atau perekonomian negara terkait dengan pembayaran komisi terhadap kegiatan fiktif agen PT Asuransi Jasa Indonesia (Persero) dalam penutupan Asuransi Oil and Gas pada BP Migas-KKKS Tahun 2010 s.d. 2012 dan Tahun 2012 s.d. 2014 atas nama tersangka BUDI TJAHHJONO



(Direktur umum PT. Asuransi Jasa Indonesia - BUMN). Sprin.Dik-21/01/03/2017 Tanggal 27 Maret 2017.

6. Perkara TPK Penyelenggara Negara Yang Bersama-sama menerima hadiah atau janji tersebut diberikan untuk menggerakkan agar melakukan atau tidak melakukan sesuatu dalam jabatannya yang bertentangan dengan kewajibannya terkait dengan Proses Pengadaan Satelit Monitoring di Bakamla RI pada APBN-P TA 2016 atas nama tersangka NOFEL HASAN (Kepala Biro Perencanaan dan Organisasi Bakamla RI). Sprin.Dik-22/01/03/2017 Tanggal 30 Maret 2017.
7. Perkara TPK dalam kegiatan Sosialisasi Sektor Energi dan Sumber Daya Mineral Bahan Bakar Minyak Bersubsidi; Kegiatan Sepeda Sehat Dalam Rangka Sosialisasi Hemat Energi; dan Perawatan Gedung Kantor Sekretariat Jenderal di Kementerian Energi dan Sumber Daya Mineral Tahun Anggaran 2012 atas nama tersangka SRI UTAMI (Pegawai Negeri Sipil Kementerian ESDM). Sprin.Dik-23/01/03/2017 Tanggal 31 Maret 2017.
8. Perkara TPK yaitu menerima hadiah atau janji terkait Penunjukan Ashanti Inc. sebagai agen eksklusif PT. PAL Indonesia (Persero) dalam Pengadaan Kapal SSV untuk Pemerintahan Filipina Tahun 2014 sd 2017 atas nama tersangka ARIF CAHYANA (Manager Keuangan PT. PAL Indonesia (Persero)). Sprin.Dik-24/01/03/2017 Tanggal 31 Maret 2017.
9. Perkara TPK yaitu menerima hadiah atau janji terkait Penunjukan Ashanti Inc. sebagai agen eksklusif PT. PAL Indonesia (Persero) dalam Pengadaan Kapal SSV untuk Pemerintahan Filipina Tahun 2014 sd 2017 atas nama tersangka M. FIRMANSYAH ARIFIN (Direktur Utama PT. PAL Indonesia (Persero)). Sprin.Dik-25/01/03/2017 Tanggal 31 Maret 2017.
10. Perkara TPK yaitu menerima hadiah atau janji terkait Penunjukan Ashanti Inc. sebagai agen eksklusif PT. PAL Indonesia (Persero) dalam Pengadaan Kapal SSV untuk Pemerintahan Filipina Tahun 2014 sd 2017 atas nama tersangka SAIFUL ANWAR (Direktur Keuangan PT. PAL Indonesia (Persero)). Sprin.Dik-26/01/03/2017 Tanggal 31 Maret 2017.
11. Perkara TPK yaitu memberi hadiah atau janji terkait Penunjukan Ashanti Inc. sebagai agen eksklusif PT. PAL Indonesia (Persero) dalam Pengadaan Kapal SSV untuk Pemerintahan Filipina Tahun 2014 sd 2017 kepada Arif Cahyana selaku Manager Keuangan PT. PAL Indonesia (Persero) bersama-sama dengan M. Firmansyah Arifin selaku Direktur Utama PT. PAL Indonesia (Persero) dan Saiful Anwar selaku Direktur Keuangan PT. PAL Indonesia (Persero) atas nama tersangka AGUS NUGROHO (Direktur Umum PT. Pirusa Sejati). Sprin.Dik-27/01/03/2017 Tanggal 31 Maret 2017.

---

## Februari

1. Perkara TPPU dalam hubungannya dengan perbuatan menempatkan, mentransfer, mengalihkan, membelanjakan, membayarkan, menghibahkan, menitipkan, membawa ke luar negeri, mengubah bentuk, menukarkan dengan mata uang atau surat berharga atau perbuatan lain atas harta kekayaan yang diketahuinya atau patut diduganya merupakan hasil TPK dengan

- tujuan menyembunyikan atau menyamarkan asal usul harta kekayaan atas nama tersangka BAMBANG IRIANTO (Walikota Madiun). Sprin.Dik-11/01/02/2017 Tanggal 1 Februari 2017.
2. Perkara TPK dalam pengadaan dan pelaksanaan pekerjaan konstruksi Pembangunan Gedung Kampus Institut Pemerintahan Dalam Negeri (IPDN) Provinsi Riau di Kabupaten Rokan Hilir Tahap II pada Kementerian Dalam Negeri Republik Indonesia Tahun Anggaran 2011 atas nama tersangka DUDY JOCOM (PPK merangkap KPA pada Pusat Administrasi Keuangan dan Pengelolaan Aset Sekretariat Jenderal Kemendagri). Sprin.Dik-12/01/02/2017 Tanggal 20 Februari 2017.
  3. Perkara TPK dalam pengadaan dan pelaksanaan pekerjaan konstruksi Pembangunan Gedung Kampus Institut Pemerintahan Dalam Negeri (IPDN) Provinsi Riau di Kabupaten Rokan Hilir Tahap II pada Kementerian Dalam Negeri Republik Indonesia Tahun Anggaran 2011 atas nama tersangka BUDI RACHMAT KURNIAWAN (Kadiv Gedung PT. Utama Karya (Persero) BUMN) dkk. Sprin.Dik-13/01/02/2017 Tanggal 20 Februari 2017.
  4. Perkara TPK dalam pengadaan dan pelaksanaan pekerjaan konstruksi Pembangunan Gedung Kampus Institut Pemerintahan Dalam Negeri (IPDN) Provinsi Riau di Kabupaten Rokan Hilir Tahap II pada Kementerian Dalam Negeri Republik Indonesia Tahun Anggaran 2011 atas nama tersangka BAMBANG MUSTAQIM (Senior Manager PT. Utama Karya (Persero) BUMN). Sprin.Dik-14/01/02/2017 Tanggal 20 Februari 2017.
  5. Perkara TPPU dalam hubungannya dengan perbuatan menempatkan, mentransfer, mengalihkan, membelanjakan, membayarkan, menghibahkan, menitipkan, membawa ke luar negeri, mengubah bentuk, menukarkan dengan mata uang atau surat berharga atau perbuatan lain atas harta kekayaan yang diketahuinya atau patut diduganya merupakan hasil tindak pidana dengan tujuan menyembunyikan atau menyamarkan asal usul harta kekayaan atas nama tersangka TAUFIQURRAHAMAN (Bupati Nganjuk). Sprin.Dik-15/01/02/2017 Tanggal 23 Februari 2017.
  6. Perkara TPK menerima hadiah atau janji padahal diketahui atau patut diduga bahwa hadiah atau janji tersebut diberikan untuk mempengaruhi putusan perkara yang diserahkan kepadanya untuk diadili terkait permohonan keberatan hasil Pilkada Kabupaten Empat Lawang dan Kota Palembang di Mahkamah Konstitusi RI atas nama tersangka MUHTAR EPENDY (Swasta) bersama-sama dengan M. Akil Mochtar selaku Ketua MK atau selaku Hakim pada MK. Sprin.Dik-16/01/02/2017 Tanggal 28 Februari 2017.
- 

## Januari

1. Perkara TPK dalam pengadaan dan pemasangan Pembangkit Listrik Tenaga Surya (PLTS) berupa Solar Home System (SHS) dan Pembangkit Listrik Tenaga Mikro Hidro (PLTMH) pada Direktorat Jenderal Listrik dan Pemanfaatan Energi Departemen Energi dan Sumber Daya

Mineral (LPE ESDM) tahun anggaran 2009 atas nama tersangka JACOB PURWONO (Dirjen LPE Departemen ESDM). Sprin.Dik-39/01/08/2010 Tgl. 26 Agustus 2010.

2. Perkara TPK pengadaan alat kesehatan Kedokteran Umum Puskesmas Kota Tangerang Selatan APBDP Tahun Anggaran 2012 atas nama tersangka TUBAGUS CHAERI WARDANA CHASAN alias TB. CHAERI WARDANA (Swasta). 2013
3. Perkara TPK yaitu pegawai negeri atau penyelenggara negara yang dengan maksud menguntungkan diri sendiri atau orang lain secara melawan hukum, atau dengan menyalahgunakan kekuasaannya memaksa seseorang memberikan sesuatu, membayar, dan atau menerima pembayaran dengan potongan, atau untuk mengerjakan sesuatu bagi dirinya sendiri; atau pegawai negeri atau penyelenggara negara yang menerima hadiah atau janji padahal diketahui atau patut diduga, bahwa hadiah atau janji tersebut diberikan untuk menggerakkan agar melakukan sesuatu atau disebabkan karena telah melakukan atau tidak melakukan sesuatu yang bertentangan dengan kewajibannya atau diberikan karena kekuasaan atau kewenangan yang berhubungan dengan jabatannya atas nama tersangka RATU ATUT CHOSIYAH (Gubernur Banten). 2014
4. Perkara TPK pengadaan sarana dan prasarana alat kesehatan dan pengadaan lainnya di lingkungan Pemerintah Provinsi Banten Tahun 2011 – 2013 atas nama tersangka RATU ATUT CHOSIYAH (Gubernur Banten). 2014
5. Perkara TPK pengadaan sarana dan prasarana alat kesehatan dan pengadaan lainnya di lingkungan Pemerintah Provinsi Banten Tahun 2011 – 2013 atas nama tersangka TUBAGUS CHAERI WARDANA CHASAN (Swasta). 2014
6. Perkara TPPU sehubungan dengan dengan perbuatan menempatkan, mentransfer, mengalihkan, membelanjakan, membayarkan, menghibahkan, menitipkan, membawa ke luar negeri, mengubah bentuk, menukarkan dengan mata uang atau surat berharga atau perbuatan lain atas harta kekayaan yang diketahui atau patut diduganya merupakan hasil tindak pidana korupsi dengan tujuan menyembunyikan atau menyamarkan asal usul harta kekayaan dan atau menyembunyikan atau menyamarkan asal usul sumber, lokasi, peruntukkan, pengalihan hak-hak, atau kepemilikan yang sebenarnya atas harta kekayaan yang diketahuinya atau patut diduganya merupakan hasil tindak pidana korupsi atas nama tersangka TUBAGUS CHAERI WARDANA (Swasta).
7. Perkara TPK sehubungan dengan orang yang melakukan pembantuan terkait tindak pidana korupsi dalam pengadaan alat kesehatan untuk kebutuhan antisipasi Kejadian Luar Biasa (KLB) masalah kesehatan akibat bencana di Pusat Penanggulangan masalah Kesehatan pada Departemen Kesehatan Tahun Anggaran 2005 yang dilakukan oleh Mulya Hasjmy atas nama tersangka SITI FADILLAH SUPARI (Mantan Menteri Kesehatan RI periode Tahun 2004 – 2009).
8. Perkara TPK sehubungan dengan pengadaan paket penerapan Kartu Tanda Penduduk Berbasis Nomor Induk Kependudukan Secara Nasional (KTP Elektronik) tahun 2011 s.d. 2012 pada

Kementerian Dalam Negeri RI atas nama tersangka SUGIHARTO (PPK Direktorat Jenderal Kependudukan dan Catatan Sipil Kementerian Dalam Negeri RI).

9. Perkara TPK sehubungan dengan menerima pemberian atau janji dalam kegiatan pengadaan alat kesehatan I untuk kebutuhan Pusat Penanggulangan Krisis Departemen Kesehatan dari dana DIPA revisi APBN Pusat Penanggulangan Krisis Sekretariat Jenderal Departemen Kesehatan Tahun Anggaran 2007 atas nama tersangka SITI FADILAH SUPARI (Menteri Kesehatan Republik Indonesia Periode tahun 2004 - 2009).
10. Dugaan TPK sehubungan dengan Pengadaan Alat Kesehatan Rumah Sakit Khusus Pendidikan Penyakit Infeksi dan Pariwisata Universitas Udayana pada Tahun Anggaran 2009 atas nama tersangka MARISI MATONDANG (Swasta).
11. Perkara TPK sehubungan dengan secara bersama-sama memberi atau menjanjikan sesuatu kepada pegawai negeri atau penyelenggara negara dengan maksud supaya pegawai negeri atau penyelenggara negara tersebut berbuat atau tidak berbuat sesuatu dalam jabatannya, yang bertentangan dengan kewajibannya terkait dengan pembahasan RAPBD.P Tahun 2014 dan atau RAPBD.P Tahun 2015 pada Provinsi Riau atas nama tersangka ANNAS MAAMUN (Gubernur Riau).
12. Perkara TPK dalam Pekerjaan Pembangunan Rumah Sakit Pendidikan Khusus Penyakit Infeksi dan Pariwisata Universitas Udayana Tahun Anggaran 2009 s.d. 2011, yang diduga dilakukan oleh MADE MEREGAWA selaku Pejabat Pembuat Komitmen (PPK) Universitas Udayana dkk.
13. Perkara TPK dalam pekerjaan Pembangunan Rumah Sakit Pendidikan Khusus Penyakit Infeksi dan Pariwisata Universitas Udayana Tahun Anggaran 2009 s.d. 2011 atas nama tersangka DUDUNG PURWADI (Swasta).
14. Perkara TPK dalam pengadaan peralatan kesehatan dan laboratorium RS Tropik Infeksi di Universitas Airlangga Tahap I dan II Tahun Anggaran 2010 atas nama tersangka MINARSIH (Swasta).
15. Perkara TPK dalam pengadaan peralatan kesehatan dan laboratorium RS Tropik Infeksi di Universitas Airlangga Tahap I dan II Tahun Anggaran 2010 dan atau TPK pegawai negeri atau penyelenggara negara yang menerima pemberian atau janji padahal patut diketahui atau diduga bahwa hadiah tersebut diberikan untuk menggerakkan atau sebagai akibat karena telah melakukan atau tidak melakukan sesuatu dalam jabatannya yang bertentangan dengan kewajibannya atas nama tersangka BAMBANG GIATNO RAHARDJO (Kepala Badan Pengembangan dan Pemberdayaan Sumber Daya Manusia Kesehatan Kemenkes).
16. Perkara TPK dalam kegiatan pembangunan Wisma Atlet dan Gedung Serbaguna Pemerintah Provinsi Sumatera Selatan Tahun 2010 – 2011 atas nama tersangka DUDUNG PURWADI (Swasta).
17. Perkara TPK dengan cara memerintahkan melakukan pengadaan 3 (tiga) unit Quay Container Crane (QCC) di Pelindo II (Persero) tahun 2010 dengan menunjuk langsung Wuxi HuaDong

Heavy Machinery Co, Ltd (HDHM) dari China sebagai penyedia barang atas nama tersangka R.J. LINO (Dirut PT. Pelindo II) dkk.

18. Perkara TPK secara bersama-sama dengan Andi Alfian Mallarangeng selaku Menteri Pemuda dan Olahraga dan kawan-kawan terkait dengan proyek pembangunan/pengadaan/peningkatan sarana dan prasarana olahraga di Hambalang TA 2010-2012 atas nama tersangka ANDI ZULKARNAIN ANWAR alias CHOEL (Swasta).
19. Perkara TPK secara bersama-sama atau turut serta dalam pengadaan Reagen dan Consumable Penanganan Virus Flu Burung dengan menggunakan dana APBN-P Direktorat Bina Pelayanan Medik Dasar Direktorat Jenderal Bina Pelayanan Medik Depkes RI Tahun Anggaran 2007 atas nama tersangka FREDDY LUMBAN TOBING (Swasta).
20. Perkara TPK dalam pengadaan fasilitasi sarana budidaya mendukung pengendalian OPT dalam rangka belanja barang fisik lainnya untuk diserahkan kepada masyarakat/Pemda di Kementerian Pertanian tahun anggaran 2013 atas nama tersangka HASANUDDIN IBRAHIM (Dirjen Holtikultura/KPA).
21. Perkara TPK dalam pengadaan fasilitasi sarana budidaya mendukung pengendalian OPT dalam rangka belanja barang fisik lainnya untuk diserahkan kepada masyarakat/Pemda di Kementerian Pertanian tahun anggaran 2013 atas nama tersangka EKO MARDIYANTO (PPK pada Dirjen Holtikultura).
22. Perkara TPK dalam pengadaan fasilitasi sarana budidaya mendukung pengendalian OPT dalam rangka belanja barang fisik lainnya untuk diserahkan kepada masyarakat/Pemda di Kementerian Pertanian tahun anggaran 2013 atas nama tersangka SUTRISNO.
23. Perkara TPK dalam pengadaan dan pelaksanaan pekerjaan konstruksi Pembangunan Gedung Kampus Institut Pemerintahan Dalam Negeri (IPDN) Provinsi Sumatera Barat di Kabupaten Agam pada Kementerian Dalam Negeri RI Tahun Anggaran 2011 atas nama tersangka DUDY JOCOM (PPK Pusat Administrasi Keuangan dan Pengelolaan Aset Setjen Kementerian Dalam Negeri).
24. Perkara TPK dalam pengadaan dan pelaksanaan pekerjaan konstruksi Pembangunan Gedung Kampus Institut Pemerintahan Dalam Negeri (IPDN) Provinsi Sumatera Barat di Kabupaten Agam pada Kementerian Dalam Negeri RI Tahun Anggaran 2011 atas nama tersangka BUDI RACHMAT KURNIAWAN (Swasta).
25. Perkara TPK dalam pekerjaan pembangunan Rumah Sakit Pendidikan Universitas Airlangga Surabaya dengan sumber dana DIPA Universitas Airlangga Tahun 2007 s/d 2010 dan TPK dalam peningkatan sarana dan prasarana Rumah Sakit Universitas Airlangga Tahun 2009 atas nama tersangka FASICH (Rektor/KPA Universitas Airlangga).
26. Perkara TPK menerima hadiah atau janji dari Abdul Khoir selaku Direktur Utama PT. Windu Tunggal Utama terkait untuk mendapatkan pekerjaan di Kementerian Pekerjaan Umum dan Perumahan Rakyat Tahun Anggaran 2016 atas nama tersangka ANDI TAUFAN TIRO (Anggota Komisi V DPR RI).

27. Perkara TPK menerima hadiah atau janji terkait pengurusan perkara di Mahkamah Agung RI dan penerimaan gratifikasi atas nama tersangka ROHADI (Panitera Pengganti pada PN Jakarta Utara dan PN Bekasi).
28. Perkara TPPU dalam hubungannya dengan perbuatan menempatkan, mentransfer, mengalihkan, membelanjakan, membayarkan, menghibahkan, menitipkan, membawa ke luar negeri, mengubah bentuk, menukarkan dengan mata uang atau surat berharga atau perbuatan lain atas harta kekayaan yang diketahui atau patut diduga merupakan hasil tindak pidana korupsi dengan tujuan menyembunyikan atau menyamarkan asal usul harta kekayaan dan atau menyembunyikan atau menyamarkan asal usul sumber, lokasi, peruntukan, pengalihan hak-hak, atau kepemilikan yang sebenarnya atas harta kekayaan yang diketahuinya atau patut diduga merupakan hasil tindak pidana atas nama tersangka ROHADI (Panitera Pengganti pada PN Jakarta Utara dan PN Bekasi).
29. Perkara TPK dalam Persetujuan Pencadangan Wilayah Pertambangan, Persetujuan Izin Usaha Pertambangan (IUP) Ekplorasi dan Persetujuan Peningkatan Izin Usaha Pertambangan Eksplorasi menjadi Izin Usaha Pertambangan Operasi Produksi kepada PT. Anugrah Harisma Barakah di Wilayah Provinsi Sulawesi Tenggara Tahun 2008-2014 atas nama tersangka NUR ALAM (Gubernur Sulawesi Tenggara).
30. Perkara TPK setiap orang yang memberi atau menjanjikan sesuatu kepada penyelenggara dengan maksud supaya penyelenggara negara tersebut berbuat atau tidak berbuat sesuatu dalam jabatannya yang bertentangan dengan kewajibannya terkait dengan pengurusan perkara nomor: 520/Pidsus/2016/PN.PDG Tanggal 2 Agustus 2016 di Pengadilan Negeri Padang atas nama tersangka FARIZAL (JPU Kajati Sumbar).
31. Perkara TPK dalam Pengadaan Paket Penerapan Kartu Tanda Penduduk Berbasis Nomor Induk Kependudukan Secara Nasional (KTP Elektronik) Tahun 2011 s.d. 2012 pada Kementerian Dalam Negeri Republik Indonesia atas nama tersangka IRMAN (Mantan Dirjen Kependudukan dan Pencatatan Sipil Kemendagri).
32. Perkara TPK yaitu baik langsung maupun tidak langsung dengan sengaja turut serta dalam pemborongan, pengadaan atau persewaan yang pada saat dilakukan perbuatan untuk seluruh atau sebagian ditugaskan untuk mengurus atau mengawasinya; atau menerima gratifikasi yang berhubungan dengan jabatannya yang berlawanan dengan kewajiban atau tugasnya; atau menerima hadiah atau janji padahal diketahui atau patut diduga diberikan karena kekuasaan atau kewenangan yang berhubungan dengan jabatan atau menurut pikiran orang yang memberikan ada hubungan dengan jabatannya terkait pembangunan Pasar Besar Kota Madiun Tahun 2009 – 2012 atas nama tersangka BAMBANG IRIANTO (Walikota Madiun periode 2009 – 2014).
33. Perkara TPK menerima hadiah dari Hartoyo terkait pembahasan dan pengesahan Anggaran Dinas Pendidikan Kabupaten Kebumen dalam APBD-P Tahun 2016 atas nama tersangka

YUDHY TRI HARTANTO (Anggota DPRD Kebumen) dan SIGIT WIDODO (PNS Dinas Pariwisata dan Kebudayaan Kab. Kebumen).

34. Perkara TPK memberi atau menjanjikan sesuatu kepada pegawai negeri atau penyelenggara negara terkait dengan pengesahan anggaran pendapatan dan belanja daerah Kabupaten Tanggamus Tahun Anggaran 2016 atas nama tersangka BAMBANG KURNIAWAN (Bupati Tanggamus).
35. Perkara TPK memberi atau menjanjikan sesuatu kepada hakim dengan maksud untuk mempengaruhi putusan perkara yang diserahkan kepadanya untuk diadili terkait dengan sengketa pemilihan kepada daerah Kabupaten Buton, Sulawesi Tenggara, di Mahkamah Konstitusi Tahun 2011/2012 kepada terpidana M. Akil Mochtar atas nama tersangka SAMSU UMAR ABDUL SAMIUN ALIAS UMAR SAMIUN (Bupati Buton 2012 – 2017).
36. Perkara TPK penerimaan hadiah atau janji secara bersama-sama terkait pembahasan Anggaran Optimalisasi pada Direktorat Jenderal Pembinaan Pembangunan Kawasan Transmigrasi (DitjenP2Ktrans), Kementerian Tenaga Kerja dan Transmigrasi RI Tahun Anggaran 2014 atas nama tersangka CHARLES JONES MESANG (Anggota DPR RI 2009 – 2014).
37. Perkara TPK pengadaan pupuk urea tablet di Perum Perhutani unit 1 Jawa Tengah Tahun 2010 – 2011 atas nama tersangka HERU SISWANTO (Kepala Perum Perhutani Unit 1 Jawa Tengah).
38. Perkara TPK pengadaan pupuk urea tablet di Perum Perhutani unit 1 Jawa Tengah Tahun 2010 – 2011 atas nama tersangka BAMBANG WURYANTO (Kepala Biro Pembinaan Sumber Daya Hutan Perum Perhutani Unit 1 Jawa Tengah).
39. Perkara TPK pengadaan pupuk urea tablet di Perum Perhutani unit 1 Jawa Tengah Tahun 2010 – 2011 atas nama tersangka ASEP SUDRAJAT SANUSI (Dirut PT. Berdikari).
40. Perkara TPK pengadaan pupuk urea tablet di Perum Perhutani unit 1 Jawa Tengah Tahun 2012 – 2013 atas nama tersangka TEGUH HADI SISWANTO (Kepala Perum Perhutani Unit 1 Jawa Tengah).
41. Perkara TPK pengadaan pupuk urea tablet di Perum Perhutani unit 1 Jawa Tengah Tahun 2012 – 2013 atas nama tersangka LIBRATO EL ARIF (Dirut PT. Berdikari).
42. Perkara TPK penyalahgunaan kewenangan dalam menggunakan dana Pendidikan Luar Sekolah pada Sub Dinas PLS Dinas Pendidikan dan Kebudayaan Provinsi Nusa Tenggara Timur Tahun Anggaran 2007 atas nama tersangka MARTHEN DIRA TOME (Kasubdin PLS Provinsi NTT/ PPK).
43. Perkara TPK menerima gratifikasi yang berhubungan dengan jabatannya dan yang berlawanan dengan kewajiban atau tugasnya atas nama tersangka BAMBANG IRIANTO (Walikota Madiun).
44. Perkara TPK memberi atau menjanjikan sesuatu kepada pegawai negeri atau penyelenggara negara dengan maksud untuk mendapatkan persetujuan anggaran proyek-proyek di Direktorat Jenderal Bina Marga Kementerian Pekerjaan Umum dan Perumahan Rakyat Tahun Anggaran 2015 dan 2016 atas nama tersangka SO KOK SENG alias ASENS (Swasta).

45. Perkara TPK memberi hadiah atau janji kepada pegawai negeri atau penyelenggara negara terkait dengan pengurusan perkara di Pengadilan Negeri Jakarta Pusat dengan maksud supaya pegawai negeri atau penyelenggara negara tersebut berbuat atau tidak berbuat sesuatu dalam jabatannya atau karena berhubungan dengan suatu perbuatan yang berhubungan dengan jabatannya yang bertentangan dengan kewajibannya atas nama tersangka EDDY SINDORO.
46. Perkara TPK memberikan hadiah atau janji kepada pegawai negeri atau penyelenggara negara pada Direktorat Jenderal Pajak (DJP) atas nama tersangka RAMAPANICKER RAJAMOHANAN NAIR (Swasta).
47. Perkara TPK menerima hadiah atau janji yang dilakukan oleh pegawai negeri atau penyelenggara negara pada Direktorat Jenderal Pajak (DJP) atas nama tersangka HANDANG SOEKARNO (Kasubdit Bukti Permulaan Direktorat Penegakan Hukum dan PPNS).
48. Perkara TPK dengan sengaja turut serta dalam pemborongan, pengadaan, atau persewaan, yang pada saat dilakukan perbuatan ditugaskan untuk mengurus atau mengawasi terkait dengan: a. Proyek Pembangunan Jembatan Kedungingas di Kabupaten Nganjuk tahun 2009, b. Proyek Rehabilitasi Saluran Melilir Nganjuk di Kabupaten Nganjuk tahun 2009, c. Proyek Perbaikan Jalan Sukomoro – Kecubung di Kabupaten Nganjuk tahun 2009, d. Proyek Rehabilitasi Saluran Pembuang Ganggangmalang di Kabupaten Nganjuk tahun 2009, e. Proyek Pemeliharaan Berkala Jalan Ngrengket – Mlorah di Kabupaten Nganjuk tahun 2009, atas nama tersangka TAUFIQURRAHMAN (Bupati Nganjuk).
49. Perkara TPK menerima gratifikasi yang berhubungan dengan jabatannya dan yang berlawanan dengan kewajibannya atau tugasnya atas nama tersangka TAUFIQURRAHMAN (Bupati Nganjuk).
50. Perkara TPK memberi atau menjanjikan sesuatu kepada pegawai negeri atau penyelenggara negara untuk pengurusan perkara nomor:454/Pidsus/2016/PN.Jkt.UTR pada Pengadilan Negeri Jakarta Utara atas nama tersangka SAIPUL JAMIL.
51. Perkara TPK memberi hadiah atau janji kepada Atty Suharti selaku Walikota Cimahi bersama H.M. Itoc Tochija, Ir. M.M. terkait dengan pembangunan fisik Pasar Kota Cimahi tahun anggaran 2016 dan 2017 atas nama tersangka TRISWARA DHANU BRATA alias ADE dan HENDRIZA SOLEH GUNADI alias ARI.
52. Perkara TPK menerima hadiah atau janji dari Triswara Dhanu Brata alias Ade dan Hendriza Soleh Gunadi alias Ari terkait dengan pembangunan fisik Pasar Kota Cimahi tahun anggaran 2016 dan 2017 atas nama tersangka ATTY SUHARTI (Walikota Cimahi) dan H.M. ITOC TOCHIJA, Ir. M.M.
53. Perkara TPK secara bersama-sama dengan Sigit Widodo dan Dian Lestari Subekti Pertiwi serta Yudhi Tri Hartanto yaitu menerima hadiah atau janji dari Basikun Suwandin Atmojo alias Petruk dan Hartoyo terkait pembahasan dan pengesahan anggaran proyek di Dinas Pendidikan dan Olah Raga (Dikpora) dalam APBD-P Kab. Kebumen TA 2016 atas nama tersangka ADI PANDOYO (Sekda Kab. Kebumen).



54. Perkara TPK memberi atau menjanjikan sesuatu kepada Dian Lestari Subekti Pertiwi, Yudhi Tri Hartanto dan Adi Pandoyo serta Sigit Widodo terkait pembahasan dan pengesahan anggaran proyek di Dinas Pendidikan dan Olah Raga (Dikpora) dalam APBD-P Kab. Kebumen TA 2016 atas nama tersangka BASIKUN SUWANDIN ATMOJO alias PETRUK.
55. Perkara TPK memberi atau menjanjikan sesuatu kepada penyelenggara dengan maksud supaya penyelenggara negara tersebut berbuat atau tidak berbuat sesuatu dalam jabatannya yang bertentangan dengan kewajibannya terkait dengan pengelolaan perkara nomor: 520/Pidsus/2016/PN.PDG Tanggal 2 Agustus 2016 di Pengadilan Negeri Padang atas nama tersangka XAVERIANDY SUTANTO (Swasta).
56. Perkara TPK setiap orang yang secara bersama-sama memberi atau menjanjikan sesuatu kepada penyelenggara negara dengan maksud supaya penyelenggara negara tersebut berbuat atau tidak berbuat sesuatu dalam jabatannya, yang bertentangan dengan kewajibannya terkait dengan Proses Pengadaan Satelit Monitoring di Bakamla RI pada APBN-P TA 2016, atas nama tersangka MUHAMMAD ADAMI OKTA.
57. Perkara TPK setiap orang yang secara bersama-sama memberi atau menjanjikan sesuatu kepada penyelenggara negara dengan maksud supaya penyelenggara negara tersebut berbuat atau tidak berbuat sesuatu dalam jabatannya, yang bertentangan dengan kewajibannya terkait dengan Proses Pengadaan Satelit Monitoring di Bakamla RI pada APBD-P TA 2016 atas nama tersangka HARDY STEFANUS.
58. Perkara TPK penyelenggara negara menerima hadiah atau janji padahal diketahui atau patut diduga bahwa hadiah atau janji tersebut diberikan untuk menggerakkan agar melakukan atau tidak melakukan sesuatu dalam jabatannya, yang bertentangan dengan kewajibannya terkait dengan Proses Pengadaan Satelit Monitoring di Bakamla RI pada APBN-P TA 2016 atas nama tersangka EKO SUSILO HADI (Deputi Bidang Informasi, Hukum, dan Kerjasama Bakamla RI/Kuasa Pengguna Anggaran pada Deputi Bidang Informasi, Hukum, dan Kerjasama Bakamla RI).
59. Perkara TPK setiap orang yang secara bersama-sama memberi atau menjanjikan sesuatu kepada penyelenggara negara dengan maksud supaya penyelenggara negara tersebut berbuat atau tidak berbuat sesuatu dalam jabatannya, yang bertentangan dengan kewajibannya terkait dengan Proses Pengadaan Satelit Monitoring di Bakamla RI pada APBN-P TA 2016 atas nama tersangka FAHMI DARMAWANSYAH.
60. Perkara TPK berupa penerimaan sesuatu oleh Penyelenggara Negara terkait pengisian jabatan di Pemerintah Kabupaten Klaten, Jawa Tengah Tahun 2016 atas nama tersangka SURAMLAN.
61. Perkara TPK berupa penerimaan sesuatu oleh Penyelenggara Negara terkait pengisian jabatan di Pemerintah Kabupaten Klaten, Jawa Tengah Tahun 2016 atas nama tersangka SRI HARTINI.
62. Perkara TPK penerimaan sesuatu hadiah atau janji secara bersama-sama dan berlanjut yang diberikan oleh Soetikno Soedarjo selaku Beneficial Owner Connaught International Pte. Ltd. dan kawan-kawan, terkait dengan pengadaan pesawat dan mesin pesawat dari Airbus S.A.S dan

Rolls-Royce P.L.C. pada PT. Garuda Indonesia (Persero) Tbk atas nama tersangka EMIRSYAH SATAR (Dirut PT. Garuda Indonesia (Persero) Tbk). Sprin.Dik-01/01/01/2017 Tanggal 16 Januari 2017.

63. Perkara TPK pemberian sesuatu hadiah atau janji secara bersama-sama dan berlanjut kepada Emirsyah Satar (Dirut PT. Garuda Indonesia (Persero) Tbk), terkait dengan pengadaan pesawat dan mesin pesawat dari Airbus S.A.S dan Rolls-Royce P.L.C. pada PT. Garuda Indonesia (Persero) Tbk atas nama tersangka SOETIKNO SOEDARJO (Beneficial Owner Connaught International Pte. Ltd - Swasta) dan kawan-kawan. Sprin.Dik-02/01/01/2017 Tanggal 16 Januari 2017.
64. Perkara TPK penerimaan hadiah atau janji terkait penerbitan paspor RI dengan metode Reach Out Tahun 2016 dan proses penerbitan calling visa tahun 2013 s.d. tahun 2016 atas nama tersangka DWI WIDODO (Penyidik Pegawai Negeri Sipil yang menjabat sebagai Atase Imigrasi pada Kedutaan Besar Republik Indonesia di Kuala Lumpur Malaysia). Sprin.Dik-03/01/01/2017 Tanggal 17 Januari 2017.
65. Perkara TPK dalam pengadaan pekerjaan peningkatan Jalan Kemiri-Depapre (112) 24 Km (DAK) di Kabupaten Jayapura dengan sumber dana APBD-P Pemerintah Provinsi Papua Tahun Anggaran 2015 atas nama tersangka MIKAEL KAMBUAYA (Kadis Prov. Papua) dkk. Sprin.Dik-04/01/01/2017 Tanggal 19 Januari 2017.
66. Perkara TPK menerima hadiah atau janji dari So Kok Seng alias Aseng selaku Komisaris PT. Cahaya Mas Perkasa untuk mendapatkan proyek di Kementerian Pekerjaan Umum dan Perumahan Rakyat tahun anggaran 2015 dan tahun anggaran 2016 atas nama tersangka YUDI WIDIANA ADIA (Anggota Komisi V DPR RI periode 2014 - 2019). Sprin.Dik-05/01/01/2017 Tanggal 24 Januari 2017.
67. Perkara TPK menerima hadiah atau janji dari Abdul Khoir selaku Dirut PT. Windhu Tunggal Utama dan kawan-kawan untuk mendapatkan proyek di Kementerian Pekerjaan Umum dan Perumahan Rakyat tahun anggaran 2016 atas nama tersangka MUSA ZAINUDDIN (Anggota Komisi V DPR RI periode 2014 - 2019). Sprin.Dik-06/01/01/2017 Tanggal 24 Januari 2017.
68. Perkara TPK memberi atau menjanjikan sesuatu kepada Hakim Mahkamah Konstitusi terkait dengan permohonan Judicial Review UU No. 41 Tahun 2014 tentang Peternakan dan Kesehatan Hewan Nomor Register perkara 129/PUU-XIII/2015 atas nama tersangka BASUKI HARIMAN (Swasta). Sprin.Dik-07/01/01/2017 Tanggal 26 Januari 2017.
69. Perkara TPK bersama-sama atau turut serta memberi atau menjanjikan sesuatu kepada Hakim Mahkamah Konstitusi terkait dengan permohonan Judicial Review UU No. 41 Tahun 2014 tentang Peternakan dan Kesehatan Hewan Nomor Register perkara 129/PUU-XIII/2015 atas nama tersangka NG FENNY (Swasta). Sprin.Dik-08/01/01/2017 Tanggal 26 Januari 2017.
70. Perkara TPK bersama-sama atau turut serta dengan Patrialis Akbar selaku Hakim Mahkamah Konstitusi menerima hadiah atau janji terkait dengan permohonan Judicial Review UU No. 41 Tahun 2014 tentang Peternakan dan Kesehatan Hewan Nomor Register perkara 129/PUU-

XIII/2015 dari Basuki Hariman atas nama tersangka KAMALUDIN (Swasta). Sprin.Dik-09/01/01/2017 Tanggal 26 Januari 2017.

71. Perkara TPK menerima hadiah atau janji terkait dengan permohonan Judicial Review UU No. 41 Tahun 2014 tentang Peternakan dan Kesehatan Hewan Nomor Register perkara 129/PUU-XIII/2015 dari Basuki Hariman dkk atas nama tersangka PATRIALIS AKBAR (Hakim MK). Sprin.Dik-10/01/01/2017 Tanggal 26 Januari 2017.

---

**Share :**

Bagikan 0

Tweet

## PENINDAKAN

Penyidikan (/id/berkas/penindakan/penyidikan)

Penuntutan (/id/berkas/penindakan/penuntutan)

Inkracht (/id/berkas/penindakan/inkracht)

Jejak Kasus (/id/jejak-kasus)

















































## LINK

[TENTANG ACCH \(/ID/TENTANG-ACCH\)](#).

[DISCLAIMER \(/ID/DISCLAIMER\)](#).

[KETENTUAN \(/ID/KETENTUAN\)](#).

[SITEMAP \(/ID/SITEMAP\)](#).

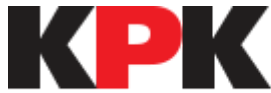

**Komisi Pemberantasan Korupsi**

## REDAKSI ACCH

KOMISI PEMBERANTASAN KORUPSI  
JL. KUNINGAN PERSADA KAV. 4 JAKARTA 12950  
TELP: (021) 2557 8300 EXT. 8642  
EMAIL: [ACCH@KPK.GO.ID](mailto:ACCH@KPK.GO.ID)  
([MAILTO:ACCH@KPK.GO.ID](mailto:ACCH@KPK.GO.ID)).

([HTTPS://WWW.KPK.GO.ID/](https://www.kpk.go.id/)).

COPYRIGHT © 2017 ANTI-CORRUPTION CLEARING HOUSE. ALL RIGHTS RESERVED
