# Supplementary material for: Democratization, leader education and growth: firm-level evidence from Indonesia
Source: Springer Nature journal article supplement (doi:10.1007/s10887-022-09221-5), 2023-02-15
Supplement: MOESM2 [file Penyidikan 2018.pdf › Data/Mayor-level corruption dataset (incl sources)/KPK Penyidikan 2006-/Penyidikan 2018.pdf]

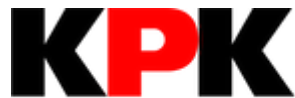

Komisi Pemberantasan Korupsi

(https://www.kpk.go.id/)

▼ Bahasa Indonesia

## Penyidikan

### Penyidikan 2018 (/id/publikasi/penanganan-perkara/penyidikan/734-penyidikan-2018)

📁 Penyidikan (/id/publikasi/penanganan-perkara/penyidikan) 📅 22 Januari 2019

Kegiatan penyidikan dilaksanakan sebanyak 274 (duaratus tujuh puluh empat) perkara, yang terdiri dari perkara sisa tahun 2017 sebanyak 75 (tujuh puluh lima) perkara dan perkara tahun 2018 sebanyak 199 (seratus sembilan puluh sembilan) perkara, yaitu:

#### Januari

1. Perkara TPK dalam pengadaan dan pemasangan Pembangkit Listrik Tenaga Surya (PLTS) berupa Solar Home System (SHS) dan Pembangkit Listrik Tenaga Mikro Hidro (PLTMH) pada Direktorat Jenderal Listrik dan Pemanfaatan Energi Departemen Energi dan Sumber Daya Mineral (LPE ESDM) tahun anggaran 2009 atas nama tersangka JACOB PURWONO (Dirjen LPE Departemen ESDM). Sprin.Dik-39/01/08/2010 Tgl. 26 Agustus 2010.
2. Perkara TPK pengadaan alat kesehatan Kedokteran Umum Puskesmas Kota Tangerang Selatan APBDP Tahun Anggaran 2012 atas nama tersangka TUBAGUS CHAERI WARDANA CHASAN alias TB. CHAERI WARDANA (Swasta). Sprin.Dik-62/01/11/2013.
3. Perkara TPK pengadaan sarana dan prasarana alat kesehatan dan pengadaan lainnya di lingkungan Pemerintah Provinsi Banten Tahun 2011 – 2013 atas nama tersangka TUBAGUS CHAERI WARDANA CHASAN (Swasta). Sprin.Dik-03/01/01/2014.
4. Perkara TPPU sehubungan dengan dengan perbuatan menempatkan, mentransfer, mengalihkan, membelanjakan, membayarkan, menghibahkan, menitipkan, membawa ke luar negeri, mengubah bentuk, menukarkan dengan mata uang atau surat berharga atau perbuatan lain atas harta kekayaan yang diketahui atau patut diduganya merupakan hasil tindak pidana korupsi dengan tujuan menyembunyikan atau menyamarkan asal usul harta kekayaan dan atau menyembunyikan atau menyamarkan asal usul sumber, lokasi, peruntukkan, pengalihan hak-hak, atau kepemilikan yang sebenarnya atas harta kekayaan yang diketahuinya atau patut diduganya merupakan hasil tindak pidana korupsi atas nama tersangka TUBAGUS CHAERI WARDANA (Swasta). Sprin.Dik-06/01/01/2014.
5. Perkara TPK sehubungan dengan secara bersama-sama memberi atau menjanjikan sesuatu kepada pegawai negeri atau penyelenggara negara dengan maksud supaya pegawai negeri atau penyelenggara negara tersebut berbuat atau tidak berbuat sesuatu dalam jabatannya, yang bertentangan dengan kewajibannya terkait dengan pembahasan RAPBD.P Tahun 2014 dan atau

- RAPBD.P Tahun 2015 pada Provinsi Riau atas nama tersangka ANNAS MAAMUN (Gubernur Riau). Sprin.Dik-01/01/01/2015.
6. Perkara TPK dalam Pekerjaan Pembangunan Rumah Sakit Pendidikan Khusus Penyakit Infeksi dan Pariwisata Universitas Udayana Tahun Anggaran 2009 s.d. 2011, yang diduga dilakukan oleh MADE MEREGAWA selaku Pejabat Pembuat Komitmen (PPK) Universitas Udayana dkk. Sprin.Dik-32/01/09/2015.
  7. Perkara TPK dalam pengadaan peralatan kesehatan dan labolatorium RS Tropik Infeksi di Universitas Airlangga Tahap I dan II Tahun Anggaran 2010 atas nama tersangka MINARSIH (Swasta). Sprin.Dik-34/01/09/2015.
  8. Perkara TPK dalam pengadaan peralatan kesehatan dan labolatorium RS Tropik Infeksi di Universitas Airlangga Tahap I dan II Tahun Anggaran 2010 dan atau TPK pegawai negeri atau penyelenggara negara yang menerima pemberian atau janji padahal patut diketahui atau diduga bahwa hadiah tersebut diberikan untuk menggerakkan atau sebagai akibat karena telah melakukan atau tidak melakukan sesuatu dalam jabatannya yang bertentangan dengan kewajibannya atas nama tersangka BAMBANG GIATNO RAHARDJO (Kepala Badan Pengembangan dan Pemberdayaan Sumber Daya Manusia Kesehatan Kemenkes). Sprin.Dik-35/01/09/2015.
  9. Perkara TPK dengan cara memerintahkan melakukan pengadaan 3 (tiga) unit Quay Container Crane (QCC) di Pelindo II (Persero) tahun 2010 dengan menunjuk langsung Wuxi HuaDong Heavy Machinery Co, Ltd (HDHM) dari China sebagai penyedia barang atas nama tersangka R.J. LINO (Dirut PT. Pelindo II) dkk. Sprin.Dik-55/01/12/2015.
  10. Perkara TPK secara bersama-sama atau turut serta dalam pengadaan Reagen dan Comsumable Penanganan Virus Flu Burung dengan menggunakan dana APBN-P Direktorat Bina Pelayanan Medik Dasar Direktorat Jenderal Bina Pelayanan Medik Depkes RI Tahun Anggaran 2007 atas nama tersangka FREDDY LUMBAN TOBING (Swasta). Sprin.Dik-57/01/12/2015.
  11. Perkara TPK dalam pengadaan fasilitas sarana budidaya mendukung pengendalian OPT dalam rangka belanja barang fisik lainnya untuk diserahkan kepada masyarakat/Pemda di Kementerian Pertanian tahun anggaran 2013 atas nama tersangka HASANUDDIN IBRAHIM (Dirjen Holtikultura/KPA). Sprin.Dik-05/01/01/2016.
  12. Perkara TPK dalam pengadaan fasilitas sarana budidaya mendukung pengendalian OPT dalam rangka belanja barang fisik lainnya untuk diserahkan kepada masyarakat/Pemda di Kementerian Pertanian tahun anggaran 2013 atas nama tersangka EKO MARDIYANTO (PPK pada Dirjen Holtikultura). Sprin.Dik-06/01/01/2016.
  13. Perkara TPK dalam pengadaan fasilitas sarana budidaya mendukung pengendalian OPT dalam rangka belanja barang fisik lainnya untuk diserahkan kepada masyarakat/Pemda di Kementerian Pertanian tahun anggaran 2013 atas nama tersangka SUTRISNO. Sprin.Dik-07/01/01/2016.
  14. Perkara TPK dalam pengadaan dan pelaksanaan pekerjaan konstruksi Pembangunan Gedung Kampus Institut Pemerintahan Dalam Negeri (IPDN) Provinsi Sumatera Barat di Kabupaten Agam pada Kementerian Dalam Negeri RI Tahun Anggaran 2011 atas nama tersangka DUDY JOCOM (PPK Pusat Administrasi Keuangan dan Pengelolaan Aset Setjen Kementerian Dalam Negeri). Sprin.Dik-12/01/02/2016.
  15. Perkara TPK dalam pengadaan dan pelaksanaan pekerjaan konstruksi Pembangunan Gedung Kampus Institut Pemerintahan Dalam Negeri (IPDN) Provinsi Sumatera Barat di Kabupaten Agam pada Kementerian Dalam Negeri RI Tahun Anggaran 2011 atas nama tersangka BUDI RACHMAT KURNIAWAN (Swasta). Sprin.Dik-13/01/02/2016.
  16. Perkara TPK dalam pekerjaan pembangunan Rumah Sakit Pendidikan Universitas Airlangga Surabaya dengan sumber dana DIPA Universitas Airlangga Tahun 2007 s/d 2010 dan TPK dalam peningkatan sarana dan prasarana Rumah Sakit Universitas Airlangga Tahun 2009 atas nama tersangka FASICH (Rektor/KPA Universitas Airlangga). Sprin.Dik-16/01/03/2016.

17. Perkara TPK menerima hadiah atau janji terkait pengurusan perkara di Mahkamah Agung RI dan penerimaan gratifikasi atas nama tersangka ROHADI (Panitera Pengganti pada PN Jakarta Utara dan PN Bekasi). Sprin.Dik-56/01/08/2016.
18. Perkara TPPU dalam hubungannya dengan perbuatan menempatkan, mentransfer, mengalihkan, membelanjakan, membayarkan, menghibahkan, menitipkan, membawa ke luar negeri, mengubah bentuk, menukarkan dengan mata uang atau surat berharga atau perbuatan lain atas harta kekayaan yang diketahui atau patut diduga merupakan hasil tindak pidana korupsi dengan tujuan menyembunyikan atau menyamarkan asal usul harta kekayaan dan atau menyembunyikan atau menyamarkan asal usul sumber, lokasi, peruntukan, pengalihan hak-hak, atau kepemilikan yang sebenarnya atas harta kekayaan yang diketahuinya atau patut diduga merupakan hasil tindak pidana atas nama tersangka ROHADI (Panitera Pengganti pada PN Jakarta Utara dan PN Bekasi). Sprin.Dik-57/01/08/2016.
19. Perkara TPK memberi hadiah atau janji kepada pegawai negeri atau penyelenggara negara terkait dengan pengurusan perkara di Pengadilan Negeri Jakarta Pusat dengan maksud supaya pegawai negeri atau penyelenggara negara tersebut berbuat atau tidak berbuat sesuatu dalam jabatannya atau karena berhubungan dengan suatu perbuatan yang berhubungan dengan jabatannya yang bertentangan dengan kewajibannya atas nama tersangka EDDY SINDORO. Sprin.Dik-84/01/11/2016.
20. Perkara TPK penerimaan sesuatu hadiah atau janji secara bersama-sama dan berlanjut yang diberikan oleh Soetikno Soedarjo selaku Beneficial Owner Connaught International Pte. Ltd. dan kawan-kawan, terkait dengan pengadaan pesawat dan mesin pesawat dari Airbus S.A.S dan Rolls-Royce P.L.C. pada PT. Garuda Indonesia (Persero) Tbk atas nama tersangka EMIRSYAH SATAR (Dirut PT. Garuda Indonesia (Persero) Tbk). Sprin.Dik-01/01/01/2017 Tanggal 16 Januari 2017.
21. Perkara TPK pemberian sesuatu hadiah atau janji secara bersama-sama dan berlanjut kepada Emirsyah Satar (Dirut PT. Garuda Indonesia (Persero) Tbk), terkait dengan pengadaan pesawat dan mesin pesawat dari Airbus S.A.S dan Rolls-Royce P.L.C. pada PT. Garuda Indonesia (Persero) Tbk atas nama tersangka SOETIKNO SOEDARJO (Beneficial Owner Connaught International Pte. Ltd - Swasta) dan kawan-kawan. Sprin.Dik-02/01/01/2017 Tanggal 16 Januari 2017.
22. Perkara TPK dalam pengadaan pekerjaan peningakatan Jalan Kemiri-Depapre (112) 24 Km (DAK) di Kabupaten Jayapura dengan sumber dana APBD-P Pemerintah Provinsi Papua Tahun Anggaran 2015 atas nama tersangka MIKAEL KAMBUAYA (Kadis Prov. Papua) dkk. Sprin.Dik-04/01/01/2017 Tanggal 19 Januari 2017.
23. Perkara TPK dalam pengadaan dan pelaksanaan pekerjaan konstruksi Pembangunan Gedung Kampus Institut Pemerintahan Dalam Negeri (IPDN) Provinsi Riau di Kabupaten Rokan Hilir Tahap II pada Kementerian Dalam Negeri Republik Indonesia Tahun Anggaran 2011 atas nama tersangka DUDY JOCOM (PPK merangkap KPA pada Pusat Administrasi Keuangan dan Pengelolaan Aset Sekretariat Jenderal Kemendagri). Sprin.Dik-12/01/02/2017 Tanggal 20 Februari 2017.
24. Perkara TPK dalam pengadaan dan pelaksanaan pekerjaan konstruksi Pembangunan Gedung Kampus Institut Pemerintahan Dalam Negeri (IPDN) Provinsi Riau di Kabupaten Rokan Hilir Tahap II pada Kementerian Dalam Negeri Republik Indonesia Tahun Anggaran 2011 atas nama tersangka BUDI RACHMAT KURNIAWAN (Kadiv Gedung PT. Utama Karya (Persero) BUMN) dkk. Sprin.Dik-13/01/02/2017 Tanggal 20 Februari 2017.
25. Perkara TPK dalam pengadaan dan pelaksanaan pekerjaan konstruksi Pembangunan Gedung Kampus Institut Pemerintahan Dalam Negeri (IPDN) Provinsi Riau di Kabupaten Rokan Hilir Tahap II pada Kementerian Dalam Negeri Republik Indonesia Tahun Anggaran 2011 atas nama tersangka BAMBANG MUSTAQIM (Senior Manager PT. Utama Karya (Persero) BUMN). Sprin.Dik-14/01/02/2017 Tanggal 20 Februari 2017.
26. Perkara TPK menerima hadiah atau janji padahal diketahui atau patut diduga bahwa hadiah atau janji tersebut diberikan untuk mempengaruhi putusan perkara yang diserahkan kepadanya untuk

diadili terkait permohonan keberatan hasil Pilkada Kabupaten Empat Lawang dan Kota Palembang di Mahkamah Konstitusi RI atas nama tersangka MUHTAR EPENDY (Swasta) bersama-sama dengan M. Akil Mochtar selaku Ketua MK atau selaku Hakim pada MK. Sprin.Dik-16/01/02/2017 Tanggal 28 Februari 2017.

27. Perkara TPK secara bersama-sama dengan Sigit Widodo dan Yudhy Tri Hartanto serta Adi Pandoyo menerima hadiah atau janji dari Basikun Suwandin Atmojo alias Petruk dan Hartoyo terkait pembahasan dan pengesahan anggaran proyek di Dinas Pendidikan dan Olahraga (Dikpora) dalam APBD-P Kabupaten Kebumen TA 2016 atas nama tersangka DIAN LESTARI SUBEKTI PERTIWI (Anggota DPRD Kabupaten Kebumen). Sprin.Dik-17/01/03/2017 Tanggal 14 Maret 2017.
28. Perkara TPK dalam pengadaan pekerjaan peningkatan Jalan Kemiri-Depapre (112) 24 KM (DAK) di Kabupaten Jayapura dengan Sumber Dana APBD-P Pemerintah Provinsi Papua Tahun Anggaran 2015 atas nama tersangka DAVID MANIBUI (Pemegang Saham Mayoritas PT Bintuni Energy Persada (PT BEP) - Swasta). Sprin.Dik-18/01/03/2017 Tanggal 20 Maret 2017.
29. Perkara TPK dalam pemberian Surat Pemenuhan Kewajiban Pemegang Saham/ Surat
30. Keterangan Lunas (SKL) kepada Sjamsul Nursalim selaku Pemegang Saham Pengendali Bank Dagang Negara Indonesia (BDNI) pada tahun 2004 sehubungan dengan pemenuhan kewajiban penyerahan aset oleh Obligor Bantuan Likuiditas Bank Indonesia (BLBI) kepada Badan Penyehatan Perbankan Nasional (BPPN) atas nama tersangka SYAFRUDDIN ARSYAD TUMENGGUNG (Ketua BPPN). Sprin.Dik-19/01/03/2017 Tanggal 20 Maret 2017.
31. Perkara TPK setiap orang yang secara melawan hukum melakukan perbuatan memperkaya diri sendiri atau orang lain atau suatu korporasi yang dapat merugikan keuangan negara atau perekonomian negara terkait dengan pembayaran komisi terhadap kegiatan fiktif agen PT Asuransi Jasa Indonesia (Persero) dalam penutupan Asuransi Oil and Gas pada BP Migas-KKKS Tahun 2010 s.d. 2012 dan Tahun 2012 s.d. 2014 atas nama tersangka BUDI TJAHJONO (Direktur umum PT. Asuransi Jasa Indonesia - BUMN). Sprin.Dik-21/01/03/2017 Tanggal 27 Maret 2017.
32. Perkara TPK dalam kegiatan Sosialisasi Sektor Energi dan Sumber Daya Mineral Bahan Bakar Minyak Bersubsidi; Kegiatan Sepeda Sehat Dalam Rangka Sosialisasi Hemat Energi; dan Perawatan Gedung Kantor Sekretariat Jenderal di Kementerian Energi dan Sumber Daya Mineral Tahun Anggaran 2012 atas nama tersangka SRI UTAMI (Pegawai Negeri Sipil Kementerian ESDM). Sprin.Dik-23/01/03/2017 Tanggal 31 Maret 2017.
33. Perkara TPK yaitu dengan sengaja mencegah, merintangi atau menggagalkan secara langsung atau tidak langsung pemeriksaan di sidang pengadilan dalam persidangan perkara tindak pidana korupsi atas nama terdakwa Irman dan Sugiharto pada Pengadilan Tindak Pidana Korupsi pada Pengadilan Negeri Jakarta Pusat dan Penyidikan Tindak Pidana Korupsi terhadap Tersangka Miryam S. Haryani, atas nama tersangka MARKUS NARI (Anggota DPR RI Periode 2014-2019). Sprin.Dik-34/01/05/2017 Tanggal 30 Mei 2017.
34. Perkara TPK bersama-sama dengan Agus Nugroho selaku Direktur Umum PT Pirusa Sejati, yaitu memberi hadiah atau janji terkait dengan penunjukan Ashanti Sales Inc. sebagai agen eksklusif PT. PAL Indonesia (persero) dalam pengadaan kapal SSV untuk pemerintah Filipina Tahun 2014 s.d. 2017 kepada Arif Cahyana selaku Kadiv Perbendaharaan PT. PAL Indonesia (persero) bersama-sama dengan M. Firmansyah Arifin selaku Direktur Utama PT. PAL Indonesia (persero) dan Saiful Anwar selaku Direktur Desain dan Teknologi merangkap Direktur Keuangan PT. PAL Indonesia (persero) atas nama tersangka KIRANA KOTAMA (Swasta). Sprin.Dik-41/01/06/2017 Tanggal 8 Juni 2017.
35. Perkara TPK setiap orang yang secara melawan hukum melakukan perbuatan memperkaya diri sendiri atau orang lain atau suatu korporasi yang dapat merugikan keuangan negara atau perekonomian negara terkait dengan pengadaan Helikopter Angkut AW-101 di TNI Angkatan Udara Tahun 2016-2017 atas nama tersangka IRFAN KURNIA SALEH (Direktur PT. Diratama Jaya Mandiri). Sprin.Dik-44/01/06/2017 Tanggal 16 Juni 2017.

36. Perkara TPK sehubungan dengan Pekerjaan Pembangunan Rumah Sakit Pendidikan Khusus Penyakit Infeksi dan Pariwisata Universitas Udayana Tahun Anggaran 2009 s.d 2010 atas nama tersangka PT. DUTA GRAHA INDAH. Tbk (yang telah berubah nama menjadi PT. Nusa Konstruksi Enjineering, Tbk.). Sprin.Dik-52/01/06/2017 Tanggal 5 Juli 2017.
37. Perkara TPK sehubungan dengan menerima hadiah atau janji dari Suramlan dan kawan-kawan bersama-sama dengan Sri Hartini selaku Bupati Klaten periode 2016 - 2021 terkait Pengisian Perangkat Daerah serta promosi dan mutasi Kepala SMP di lingkungan Pemerintah Kabupaten Klaten tahun 2016 atas nama tersangka BAMBANG TEGUH SETYO (Kabid SD). Sprin.Dik-53/01/07/2017 Tanggal 7 Juli 2017.
38. Perkara TPK sehubungan dengan menerima hadiah atau janji bersama-sama dengan Sri Hartini selaku Bupati Klaten periode 2016 - 2021 terkait dengan proyek di Dinas Pendidikan Pemerintah Kabupaten Klaten Tahun Anggaran 2016 atas nama tersangka SUDIRNO (Sekretaris Dinas Pendidikan Klaten). Sprin.Dik-54/01/07/2017 Tanggal 7 Juli 2017.
39. Perkara TPK sehubungan dengan Pengadaan paket penerapan Kartu Tanda Penduduk berbasis nomor induk kependudukan secara nasional (KTP Elektronik) tahun 2011 s/d 2013 pada Kementerian Dalam Negeri Republik Indonesia atas nama tersangka MARKUS NARI (Anggota DPR RI Periode 2014-2019). Sprin.Dik-55/01/07/2017 Tanggal 12 Juli 2017.
40. Perkara TPK sehubungan dengan Proyek Peningkatan Jalan Batu Panjang – Pangkalan Nyirih di Kabupaten Bengkalis Propinsi Riau Tahun Anggaran 2013 s.d. Tahun Anggaran 2015 atas nama tersangka MUHAMMAD NASIR (Sekretaris Daerah Pemko Dumai Riau). Sprin.Dik-57/01/07/2017 Tanggal 19 Juli 2017.
41. Perkara TPK sehubungan dengan Proyek Peningkatan Jalan Batu Panjang – Pangkalan Nyirih di Kabupaten Bengkalis Propinsi Riau Tahun Anggaran 2013 s.d. Tahun Anggaran 2015 atas nama tersangka HOBBY SIREGAR (Direktur Utama PT. Mawatindo Road Construction – Swata). Sprin.Dik-58/01/07/2017 Tanggal 19 Juli 2017.
42. Perkara TPK sehubungan dengan Pemberian Izin Kuasa Pertambangan Eksplorasi dan Izin Kuasa Pertambangan Eksploitasi serta Izin Usaha Pertambangan Eksplorasi dan Izin Usaha Pertambangan Operasi Produksi dari Pemerintah Kabupaten Konawe Utara kepada Perusahaan Pertambangan di Wilayah Kabupaten Konawe Utara Tahun 2007-2014 atas nama tersangka ASWAD SULAIMAN (Pj. Bupati Konawe Utara (Periode 2007-2009) dan selaku Bupati Konawe Utara (Periode 2011-2016)). Sprin.Dik-59/01/07/2017 Tanggal 27 Juli 2017.
43. Perkara TPK sehubungan dengan menerima hadiah atau janji terkait Pembahasan APBD-P Pemerintah Kota Malang Tahun Anggaran 2015 dari Dr. Ir. Drs. JAROT EDY SULISTIYONO, M.Si. selaku Kepala Dinas Pekerjaan Umum Perumahan dan Pengawasan Bangunan (PUPPB) Pemerintah Kota Malang tahun 2015 dan kawan-kawan atas nama tersangka MOCH. ARIEF WICAKSONO (Ketua DPRD Malang Periode 2014-2019). Sprin.Dik-65/01/08/2017 Tanggal 03 Agustus 2017.
44. Perkara TPK sehubungan dengan memberi hadiah atau janji terkait Pembahasan APBD-P Pemerintah Kota Malang Tahun Anggaran 2015 kepada moch. Arief wicaksono, S.T. selaku Ketua DPRD Kota Malang Periode 2014-2019 atas nama tersangka JAROT EDY SULISTIYONO (Kepala Dinas Pekerjaan Umum Perumahan dan Pengawasan Bangunan (PUPPB) Pemerintah Kota Malang tahun 2015). Sprin.Dik-66/01/08/2017 Tanggal 03 Agustus 2017.
45. Perkara TPK sehubungan dengan menerima hadiah atau janji terkait penganggaran kembali proyek Pembangunan Jembatan Kedungkandang dalam APBD Pemerintah Kota Malang Tahun Anggaran 2016 pada tahun 2015 dari Hendrawan Maruszama selaku komisaris PT. Enfys Nusantara Karya atas nama tersangka MOCH. ARIEF WICAKSONO (Ketua DPRD Malang Periode 2014-2019). Sprin.Dik-67/01/08/2017 Tanggal 03 Agustus 2017.
46. Perkara TPK sehubungan memberi hadiah atau janji terkait penganggaran kembali proyek Pembangunan Jembatan Kedungkandang dalam APBD Pemerintah Kota Malang Tahun Anggaran 2016 pada Tahun 2015 kepada moch. Arief wicaksono, S.T selaku Ketua DPRD Kota Malang Periode

- 2014-2019 atas nama tersangka HENDARWAN MARUSZAMA (Komisaris PT. Enyfes Nusantara Karya). Sprin.Dik-68/01/08/2017 Tanggal 03 Agustus 2017.
47. Perkara TPK sehubungan dengan menerima hadiah atau janji dari Setia Budi selaku General Manager PT Jasa Marga (Persero) padahal diketahui atau patut diduga bahwa hadiah atau janji tersebut diberikan untuk menggerakkan agar melakukan atau tidak melakukan sesuatu dalam jabatannya atau karena telah melakukan atau tidak melakukan sesuatu dalam jabatannya, yang bertentangan dengan kewajibannya terkait dengan Pemeriksaan Dengan Tujuan Tertentu (PDTT) terhadap PT Jasa Marga (Persero) pada tahun 2017 atas nama tersangka SIGIT YUGOHARTO (Auditor BPK RI). Sprin.Dik-80/01/09/2017 tanggal 06 September 2017.
48. Perkara TPK sehubungan dengan bersama sama dengan ok. Arya zulkarnain selaku Bupati Batubara periode 2013 s.d 2018 dan Sujendi Tarsono alias Ayen terkait penerimaan hadiah atau janji dari Maringan Situmorang untuk mendapatkan proyek pembangunan Jembatan Sentang Perbatasan Kel. Labuhan Ruku menuju Desa Sintang dan Proyek Jembatan Sei Magung Kecamatan Medang Deras di Kabupaten Batubara Tahun Anggaran 2017; dan dari Syaiful Azhar karena telah mendapatkan proyek pekerjaan betonisasi Jalan di Kecamatan Talawi Kabupaten Batubara Tahun Anggaran 2017 atas nama tersangka HELMAN HERDADY (Kadis PUPR Kabupaten Batubara). Sprin.Dik-85/01/09/2017 tanggal 14 September 2017.
49. Perkara TPK sehubungan dengan bersama sama dengan Helman Herdady selaku Kadis PUPR Kabupaten Batubara dan Sujendi Tarsono alias Ayen terkait penerimaan hadiah atau janji dari Maringan Situmorang untuk mendapatkan proyek pembangunan Jembatan Sentang Perbatasan Kel. Labuhan Ruku menuju Desa Sintang dan Proyek Jembatan Sei Magung Kecamatan Medang Deras di Kabupaten Batubara Tahun Anggaran 2017; dan dari Syaiful Azhar karena telah mendapatkan proyek pekerjaan betonisasi Jalan di Kecamatan Talawi Kabupaten Batubara Tahun Anggaran 2017 atas nama tersangka OK. ARYA ZULKARNAIN (Bupati Batubara periode 2013 s.d 2018). Sprin.Dik-86/01/09/2017 tanggal 14 September 2017.
50. Perkara TPK sehubungan dengan bersama sama dengan Ok. Arya Zulkarnain selaku Bupati Batubara periode 2013 s.d 2018 dan Helman Herdady selaku Kadis PUPR Kabupaten Batubara terkait penerimaan hadiah atau janji dari Maringan Situmorang untuk mendapatkan proyek pembangunan Jembatan Sentang Perbatasan Kel. Labuhan Ruku menuju Desa Sintang dan Proyek Jembatan Sei Magung Kecamatan Medang Deras di Kabupaten Batubara Tahun Anggaran 2017; dan dari Syaiful Azhar karena telah mendapatkan proyek pekerjaan betonisasi Jalan di Kecamatan Talawi Kabupaten Batubara Tahun Anggaran 2017 atas nama tersangka SUJENDI TARSONO Alias AYEN (Swasta). Sprin.Dik-87/01/09/2017 tanggal 14 September 2017.
51. Perkara TPK sehubungan dengan menerima hadiah atau janji padahal diketahui atau patut diduga bahwa hadiah atau janji tersebut diberikan untuk menggerakkan agar melakukan atau tidak melakukan sesuatu dalam jabatannya atau karena telah melakukan atau tidak melakukan sesuatu dalam jabatannya, yang bertentangan dengan kewajibannya terkait dengan Persetujuan penetapan peraturan daerah tentang penambahan penyertaan modal kepada perusahaan daerah air minum Banjarmasin tahun 2017 atas nama tersangka IWAN RUSMALI (Anggota DPRD Banjarmasin). Sprin.Dik-88/01/09/2017 tanggal 15 September 2017.
52. Perkara TPK sehubungan dengan menerima hadiah atau janji apadahal diketahui atau patut diduga bahwa hadiah atau janji tersebut diberikan untuk menggerakkan agar melakukan atau tidak melakukan sesuatu dalam jabatannya atau karena telah melakukan atau tidak melakukan sesuatu dalam jabatannya, yang bertentangan dengan kewajibannya terkait dengan Persetujuan Penetapan Peraturan Daerah Tentang Penambahan Penyertaan Modal Kepada Perusahaan Daerah Air Minum Bandarmasih tahun 2017 atas nama tersangka ANDI EFFENDI (Anggota DPRD Banjarmasin dan Ketua Pansus Persetujuan Penetapan Peraturan Daerah). Sprin.Dik-89/01/09/2017 tanggal 15 September 2017.

53. Perkara TPK sehubungan dengan menerima hadiah atau janji apadahal diketahui atau patut diduga bahwa hadiah atau janji tersebut diberikan untuk menggerakkan agar melakukan atau tidak melakukan sesuatu dalam jabatannya atau karena telah melakukan atau tidak melakukan sesuatu dalam jabatannya, yang bertentangan dengan kewajibannya terkait dengan Persetujuan Penetapan Peraturan Daerah Tentang Penambahan Penyertaan Modal Kepada Perusahaan Daerah Air Minum Bandarmasih tahun 2017 atas nama tersangka ANDI EFFENDI (Anggota DPRD Banjarmasin dan Ketua Pansus Persetujuan Penetapan Peraturan Daerah). Sprin.Dik-89/01/09/2017 tanggal 15 September 2017.
54. Perkara TPK sehubungan dengan penerimaan hadiah atau janji bersama-sama dengan Eddy Rumpoko selaku Walikota Batu dan kawan-kawan, terkait dengan Pengadaan Barang dan Jasa di lingkungan Kota Batu Tahun Anggaran 2017. atas nama tersangka EDI SETIAWAN (Kepala Bagian Layanan Pengadaan Pemerintah Kota Batu). Sprin.Dik-92/01/09/2017 tanggal 17 September 2017.
55. Perkara TPK sehubungan dengan menerima hadiah atau janji dari Hery Susanto Gun selaku Direktur Utama PT Sawit Golden Prima terkait Pemberian Izin Lokasi untuk Keperluan Inti dan Plasma Perkebunan Kelapa Sawit di Desa Kupang Baru Kecamatan Muara Kaman kepada PT Sawit Golden Prima atas nama tersangka RITA WIDYASARI (Bupati Kutai Kartanegara periode tahun 2010-2015). Sprin.Dik-94/01/09/2017 tanggal 19 September 2017.
56. Perkara TPK sehubungan dengan memberi hadiah atau janji kepada Rita Widyasari selaku Bupati Kutai Kartanegara periode tahun 2010–2015 terkait Pemberian Ijin Lokasi untuk Keperluan Inti dan Plasma Perkebunan Kelapa Sawit di Desa Kupang Baru Kecamatan Muara Kaman kepada PT Sawit Golden Prima atas nama tersangka HERY SUSANTO GUN (Direktur Utama PT. Sawit Golden Prima). Sprin.Dik-95/01/09/2017 tanggal 19 September 2017.
57. Perkara TPK sehubungan dengan bersama-sama Khairudin selaku Komisaris PT MEDIA BANGUN BERSAMA, yaitu menerima gratifikasi yang berhubungan dengan jabatannya dan yang berlawanan dengan kewajiban atau tugasnya atas nama tersangka RITA WIDYASARI (Bupati Kutai Kartanegara periode tahun 2010-2015). Sprin.Dik-96/01/09/2017 tanggal 19 September 2017.
58. Perkara TPK sehubungan dengan bersama-sama Rita Widyasari selaku Bupati Kutai Kartanegara periode tahun 2010–2015 dan periode 2016-2021, yaitu menerima gratifikasi yang berhubungan dengan jabatannya dan yang berlawanan dengan kewajiban atau tugasnya atas nama tersangka KHAIRUDIN (Komisaris PT. Media Bangun Bersama). Sprin.Dik-97/01/09/2017 tanggal 19 September 2017.
59. Perkara TPK sehubungan dengan menerima pemberian hadiah atau janji terkait dengan pengurusan perijinan pembangunan Mall Transmart di Cilegon atas nama tersangka TUBAGUS IMAN ARIYADI (Walikota Cilegon). Sprin.Dik-101/01/09/2017 tanggal 23 September 2017.
60. Perkara TPK sehubungan dengan turut serta atau bersama-sama dengan Tubagus Iman Ariyadi selaku Walikota Cilegon, menerima pemberian hadiah atau janji terkait dengan pengurusan perijinan pembangunan Mall Transmart di Cilegon atas nama tersangka AKHMAD DITA PRAWIRA (PNS/ Kepala Dinas Penanaman Modal Pelayanan Terpadu Satu Pintu (DPM PTSP) Kota Cilegon). Sprin.Dik-102/01/09/2017 tanggal 23 September 2017.
61. Perkara TPK sehubungan dengan turut serta atau bersama-sama dengan Tubagus Iman Ariyadi selaku Walikota Cilegon, menerima pemberian hadiah atau janji terkait dengan pengurusan perijinan pembangunan Mall Transmart di Cilegon atas nama tersangka HENDRI (Swasta). Sprin.Dik-103/01/09/2017 tanggal 23 September 2017.
62. Perkara TPK sehubungan dengan pengadaan Paket Penerapan Kartu Tanda Penduduk Berbasis Nomor Induk Kependudukan Secara Nasional (KTP Elektronik) Tahun 2011 s.d 2012 pada Kementerian Dalam Negeri Republik Indonesia, bersama-sama dengan Setya Novanto, Andi Agustinus alias Andi Narogong, Irman selaku Direktur Jenderal Kependudukan dan Pencatatan Sipil Kementerian Dalam Negeri Republik Indonesia dan Sugiharto selaku Pejabat Pembuat Komitmen (PPK) Direktorat Jenderal Kependudukan dan

Pencatatan Sipil Kementerian Dalam Negeri Republik Indonesia dan kawan-kawan atas nama tersangka ANANG SUGIANA SUDIHARDJO (Swasta). Sprin.Dik-104/01/09/2017 tanggal 26 September 2017.

63. Perkara TPK sehubungan dengan memberi hadiah atau janji kepada Sudiwardono selaku Hakim pada Pengadilan Tinggi Manado terkait Penanganan upaya hukum banding atas nama Terdakwa Marlina Moha Siahaan dalam perkara tindak pidana korupsi Tunjangan Penghasilan Aparatur Pemerintah Desa (TPAPD) Kabupaten Bolaang Mongondow tahun 2010 atas nama tersangka ADITYA ANUGRAH MOHA (Anggota DPR RI). Sprin.Dik-105/01/10/2017 tanggal 07 Oktober 2017.
64. Perkara TPK sehubungan dengan menerima hadiah atau janji dari Aditya Anugrah Moha, terkait Penanganan upaya hukum banding atas nama Terdakwa Marlina Moha Siahaan dalam perkara tindak pidana korupsi Tunjangan Penghasilan Aparatur Pemerintah Desa (TPAPD) Kabupaten Bolaang Mongondow tahun 2010 atas nama tersangka SUDIWARDONO (Hakim pada Pengadilan Tinggi Manado). Sprin.Dik-106/01/10/2017 tanggal 07 Oktober 2017.
65. Perkara TPK sehubungan dengan menerima hadiah atau janji terkait Mutasi dan Promosi Jabatan di lingkungan Pemerintah Kabupaten Nganjuk, bersama-sama Ibnu Hajar selaku Kepala Dinas Pendidikan dan Kebudayaan Pemerintah Kabupaten Nganjuk dan Suwandi selaku Kepala SMP Negeri 3 Ngronggot Kabupaten Nganjuk atas nama tersangka TAUFIQURRAHMAN (Bupati Nganjuk periode tahun 2013 – 2018). Sprin.Dik-107/01/10/2017 tanggal 26 Oktober 2017.
66. Perkara TPK sehubungan dengan menerima hadiah atau janji terkait Mutasi dan Promosi Jabatan di lingkungan Pemerintah Kabupaten Nganjuk, bersama-sama Taufiqurrahman selaku Bupati Nganjuk periode tahun 2013 – 2018 dan Suwandi selaku Kepala SMP Negeri 3 Ngronggot Kabupaten Nganjuk atas nama tersangka IBNU HAJAR (Kepala Dinas Pendidikan dan Kebudayaan Pemerintah Kabupaten Nganjuk). Sprin.Dik-108/01/10/2017 tanggal 26 Oktober 2017.
67. Perkara TPK sehubungan dengan menerima hadiah atau janji terkait Mutasi dan Promosi Jabatan di lingkungan Pemerintah Kabupaten Nganjuk, bersama-sama Taufiqurrahman selaku Bupati Nganjuk periode tahun 2013 – 2018 dan Ibnu Hajar selaku Kepala Dinas Pendidikan dan Kebudayaan Pemerintah Kabupaten Nganjuk, atas nama tersangka SUWANDI (Kepala SMP Negeri 3 Ngronggot Kabupaten Nganjuk). Sprin.Dik-109/01/10/2017 tanggal 26 Oktober 2017.
68. Perkara TPK sehubungan dengan menerima gratifikasi yang berhubungan dengan jabatannya dan yang berlawanan dengan kewajiban atau tugasnya atas nama tersangka TAUFIQURRAHMAN (Bupati Nganjuk periode tahun 2013 – 2018). Sprin.Dik-112/01/10/2017 tanggal 26 Okt 2017.
69. Perkara TPK sehubungan dengan memberi atau menjanjikan sesuatu terkait Pembahasan Perubahan APBD Pada Dinas Pekerjaan Umum dan Penataan Ruang Pemerintah Kota Mojokerto Tahun Anggaran 2017 atas nama tersangka MAS'UD YUNUS (Walikota Mojokerto). Sprin.Dik-114/01/11/2017 tanggal 17 November 2017.
70. Perkara TPK sehubungan dengan memberi atau menjanjikan sesuatu kepada pegawai negeri atau Penyelenggara Negara dengan maksud untuk mendapatkan Pengesahan RAPBD Propinsi Jambi Tahun Anggaran 2018 atas nama tersangka SAIPUDIN (Asisten Daerah III Bidang Administrasi Umum Provinsi Jambi). Sprin.Dik-115/01/11/2017 tanggal 29 November 2017.
71. Perkara TPK sehubungan dengan memberi atau menjanjikan sesuatu kepada pegawai negeri atau Penyelenggara Negara dengan maksud untuk mendapatkan Pengesahan RAPBD Propinsi Jambi Tahun Anggaran 2018 atas nama tersangka ERWAN MALIK (PLT. Sekda Pemerintah Daerah Provinsi Jambi). Sprin.Dik-116/01/11/2017 tanggal 29 November 2017.
72. Perkara TPK sehubungan dengan memberi atau menjanjikan sesuatu kepada pegawai negeri atau Penyelenggara Negara dengan maksud untuk mendapatkan Pengesahan RAPBD Propinsi Jambi Tahun Anggaran 2018 atas nama tersangka ARFAN (Plt. Kepala Dinas PUPR Propinsi Jambi). Sprin.Dik-117/01/11/2017 tanggal 29 November 2017.



73. Perkara TPK sehubungan dengan menerima hadiah atau janji dari Saipudin selaku Asisten Daerah III Bidang Administrasi Umum Propinsi Jambi terkait untuk mendapatkan Pengesahan RAPBD Propinsi Jambi Tahun Anggaran 2018 atas nama tersangka SUPRIYONO (Anggota DPRD Propinsi Jambi). Sprin.Dik-118/01/11/2017 tanggal 29 November 2017.
74. Perkara TPPU sehubungan dengan perbuatan menempatkan, mentransfer, mengalihkan, membelanjakan, membayarkan, menghibahkan, menitipkan, membawa ke luar negeri, mengubah bentuk, menukarkan dengan mata uang atau surat berharga atau perbuatan lain atas Harta Kekayaan yang diketahui atau patut diduganya merupakan hasil tindak pidana korupsi dengan tujuan menyembunyikan atau menyamarkan asal usul Harta Kekayaan dan atau menyembunyikan atau menyamarkan asal usul, sumber, lokasi, peruntukan pengalihan hak-hak, atau kepemilikan yang sebenarnya atas Harta Kekayaan yang diketahuinya atau patut diduganya merupakan hasil tindak pidana korupsi, atas nama tersangka RITA WIDYASARI (Bupati Kutai Kartanegara periode tahun 2010-2015). Sprin.Dik-119/01/12/2017 tanggal 27 Desember 2017.
75. Perkara TPPU sehubungan dengan perbuatan menempatkan, mentransfer, mengalihkan, membelanjakan, membayarkan, menghibahkan, menitipkan, membawa ke luar negeri, mengubah bentuk, menukarkan dengan mata uang atau surat berharga atau perbuatan lain atas Harta Kekayaan yang diketahui atau patut diduganya merupakan hasil tindak pidana korupsi dengan tujuan menyembunyikan atau menyamarkan asal usul Harta Kekayaan dan atau menyembunyikan atau menyamarkan asal usul, sumber, lokasi, peruntukan pengalihan hak-hak, atau kepemilikan yang sebenarnya atas Harta Kekayaan yang diketahuinya atau patut diduganya merupakan hasil tindak pidana korupsi, atas nama tersangka KHAIRUDIN (Swasta - Komisaris PT. MEDIA BANGUN BERSAMA). Sprin.Dik-120/01/12/2017 tanggal 27 Desember 2017.
76. Perkara TPPU sehubungan dengan perbuatan menempatkan, mentransfer, mengalihkan, membelanjakan, membayarkan, menghibahkan, menitipkan, membawa ke luar negeri, mengubah bentuk, menukarkan dengan mata uang atau surat berharga atau perbuatan lain atas Harta Kekayaan yang diketahui atau patut diduganya merupakan hasil tindak pidana korupsi dengan tujuan menyembunyikan atau menyamarkan asal usul Harta Kekayaan dan atau menyembunyikan atau menyamarkan asal usul, sumber, lokasi, peruntukan pengalihan hak-hak, atau kepemilikan yang sebenarnya atas Harta Kekayaan yang diketahuinya atau patut diduganya merupakan hasil tindak pidana korupsi, atas nama tersangka TAUFIQURRAHMAN (Bupati Kabupaten Nganjuk). Sprin.Dik-121/01/12/2017 tanggal 27 Desember 2017.
77. Perkara TPK setiap orang yang memberi atau menjanjikan sesuatu kepada pegawai negeri atau penyelenggara negara dengan maksud supaya pegawai negeri atau penyelenggara negara tersebut berbuat atau tidak berbuat sesuatu dalam jabatannya, yang bertentangan dengan kewajibannya terkait dengan Pengadaan Pekerjaan Pembangunan Ruang Perawatan Kelas I, II, VIP, dan Super VIP di RSUD Damanhuri Barabai Kabupaten Hulu Sungai Tengah TA 2017 atas nama Tersangka Ir. DONNY WITONO (Direktur Utama PT Menara Agung Pusaka - Swasta) dan kawan-kawan. Sprin.Dik-01/DIK.00/01/01/2018 Tanggal 05 Januari 2018.
78. Perkara TPK penyelenggara negara yang secara bersama-sama menerima hadiah atau janji padahal diketahui atau patut diduga bahwa hadiah atau janji tersebut diberikan untuk menggerakkan agar melakukan atau tidak melakukan sesuatu dalam jabatannya yang bertentangan dengan kewajibannya terkait dengan Pengadaan Pekerjaan Pembangunan Ruang Perawatan Kelas I, II, VIP, dan Super VIP di RSUD Damanhuri Barabai Kabupaten Hulu Sungai Tengah TA 2017 atas nama Tersangka H. ABDUL LATIF (Bupati Pemkab Hulu Sungai Tengah periode 2016-2021) dan kawan-kawan. Sprin.Dik-02/ DIK.00/01/01/2018 Tanggal 05 Januari 2018.
79. Perkara TPK penyelenggara negara yang secara bersama-sama menerima hadiah atau janji padahal diketahui atau patut diduga bahwa hadiah atau janji tersebut diberikan untuk menggerakkan agar melakukan atau tidak melakukan sesuatu dalam jabatannya yang bertentangan dengan kewajibannya terkait dengan Pengadaan Pekerjaan Pembangunan Ruang Perawatan Kelas I, II, VIP,

- dan Super VIP di RSUD Damanhuri Barabai Kabupaten Hulu Sungai Tengah TA 2017 atas nama tersangka H. FAUZAN RIFANI (Direktur Utama PT Putera Dharma Raya – Swasta) dan kawan-kawan. Sprin.Dik-03/ DIK.00/01/01/2018 Tanggal 05 Januari 2018.
80. Perkara TPK penyelenggara negara yang secara bersama-sama menerima hadiah atau janji padahal diketahui atau patut diduga bahwa hadiah atau janji tersebut diberikan untuk menggerakkan agar melakukan atau tidak melakukan sesuatu dalam jabatannya yang bertentangan dengan kewajibannya terkait dengan Pengadaan Pekerjaan Pembangunan Ruang Perawatan Kelas I, II, VIP, dan Super VIP di RSUD Damanhuri Barabai Kabupaten Hulu Sungai Tengah TA 2017 atas nama tersangka ABDUL BASIT (Direktur PT Sugriwa Agung – Swasta) dan kawan-kawan. Sprin.Dik-04/ DIK.00/01/01/2018 Tanggal 05 Januari 2018.
81. Perkara TPK bersama - sama dengan Bimanesh Sutarjo yaitu dengan sengaja mencegah, merintangi, atau menggagalkan secara langsung atau tidak langsung penyidikan dugaan tindak pidana korupsi dalam pengadaan paket penerapan kartu tanda penduduk berbasis nomor induk kependudukan secara nasional (KTP Elektronik) Tahun 2011 s.d 21012 pada Kementerian Dalam Negeri Republik Indonesia dengan tersangka Setya Novanto, atas nama Tersangka FREDRICH YUNADI Alias FREDY JUNADI (Pengacara). Sprin.Dik-05/ DIK.00/01/01/2018 Tanggal 05 Januari 2018.
82. Perkara TPK bersama-sama dengan Fredrich Yunadi alias Fredy Junadi yaitu dengan sengaja mencegah, merintangi, atau menggagalkan sedara langsung atau tidak langsung penyidikan dugaan tindak pidana korupsi dalam Pengadaan Paket Penerapan Kartu Tanda Penduduk Berbasis Nomor Induk Kependudukan Secara Nasional ( KTP Elektronik ) Tahun 2011 s.d 2012 pada Kementerian Dalam Negeri Republik Indonesia dengan tersangka Setya Novanto, atas nama Tersangka BIMANESH SUTARJO (Dokter). Sprin.Dik-06/ DIK.00/01/01/2018 Tanggal 05 Januari 2018.
83. Perkara TPK yaitu setiap gratifikasi kepada pegawai negara atau penyelenggara negara dianggap pemberian suap, apabila berhubungan dengan jabatannya dan yang berlawanan dengan kewajiban atau tugasnya, yang dilakukan oleh Tersangka H. ABDUL LATIF (Bupati Kabupaten Hulu Sungai Tengah periode 2016-2021) dkk. Sprin.Dik-07/ DIK.00/01/01/2018 Tanggal 12 Januari 2018.
84. Perkara TPPU sehubungan dengan perbuatan setiap orang yang menempatkan, mentransfer, mengalihkan, membelanjakan, membayarkan, menghibahkan, menitipkan, membawa ke luar negeri, mengubah bentuk, menukarkan dengan mata uang atau surat berharga atau perbuatan lain atas Harta Kekayaan yang diketahuinya atau patut diduganya merupakan hasil tindak pidana. H. ABDUL LATIF (Bupati Kabupaten Hulu Sungai Tengah periode 2016-2021). Sprin.Dik-08/ DIK.00/01/01/2018 Tanggal 12 Januari 2018.
85. Perkara TPK bersama-sama dengan Mohammad Yahya Fuad selaku Bupati Kabupaten Kebumen periode 2016-2021 yaitu menerima hadiah atau janji padahal diketahui atau patut diduga bahwa hadiah atau janji tersebut diberikan untuk menggerakkan agar melakukan atau tidak melakukan sesuatu dalam dalam jabatannya atau karena telah melakukan atau tidak melakukan sesuatu dalam jabatannya, yang bertentangan dengan kewajibannya terkait dengan pengadaan barang dan jasa pada Anggaran Pendapatan dan Belanja Daerah ( APBD ) Kabupaten Kebumen TA 2016 dan Anggaran Pendapatan dan Belanja Daerah Perubahan APBD Perubahan ) Kabupaten Kebumen TA 2016 atas nama Tersangka HOJIN ANSORI (Swasta). Sprin.Dik-09/ DIK.00/01/01/2018 Tanggal 12 Januari 2018.
86. Perkara TPK bersama-sama dengan Hojin Ansori yaitu menerima hadiah atau janji padahal diketahui atau patut diduga bahwa hadiah atau janji tersebut diberikan untuk menggerakkan agar melakukan atau tidak melakukan sesuatu dalam jabatannya, yang bertentangan dengan kewajibannya terkait dengan pengadaan barang dan jasa pada Anggaran Pendapatan dan Belanja Daerah ( APBD ) Kabupaten Kebumen TA 2016 dan Anggaran Pendapatan dan Belanja Daerah Perubahan ( APBD Perubahan ) Kabupaten Kebumen TA 2016 atas nama tersangka MOHAMMAD

YAHYA FUAD (Bupati Kabupaten Kebumen periode 2016-2021). Sprin.Dik-10/ DIK.00/01/01/2018 Tanggal 12 Januari 2018.

87. Perkara TPK yaitu memberi atau menjanjikan sesuatu kepada Mohammad Yahya Fuad selaku Bupati Kabupaten Kebumen periode 2016-2021 bersama sama dengan Hojin Ansori dengan maksud supaya pegawai negeri atau penyelenggara negara tersebut berbuat atau tidak berbuat sesuatu dalam jabatannya terkait dengan pengadaan barang dan jasa pada Anggaran Pendapatan dan Belanja Daerah ( APBD ) Kabupaten Kebumen TA 2016 dan Anggaran Pendapatan dan Belanja Negara Perubahan ( APBD Perubahan ) Kabupaten Kebumen TA 2016 atas nama Tersangka KHAYUB MUHAMAD LUTFI (Komisaris PT. Karya Adi Kencana - Swasta). Sprin.Dik-11/ DIK.00/01/01/2018 Tanggal 12 Januari 2018.
88. Perkara TPK pegawai negeri atau penyelenggara negara yang menerima hadiah atau janji padahal diketahui atau patut diduga, bahwa hadiah atau janji tersebut diberikan untuk menggerakkan agar melakukan sesuatu dalam jabatannya, yang bertentangan dengan kewajibannya atau bahwa hadiah atau janji tersebut diberikan sebagai akibat atau disebabkan karena telah melakukan atau tidak melakukan sesuatu dalam jabatannya, yang bertentangan dengan kewajibannya atau Penerimaan Gratifikasi atau Tindak Pidana Korupsi Pegawai negeri atau penyelenggara negara yang menerima hadiah atau janji padahal diketahui atau patut diduga, bahwa hadiah atau janji tersebut diberikan karena kekuasaan atau kewenangan yang berhubungan dengan jabatannya, atau yang menurut pikiran orang yang memberikan hadiah atau janji tersebut ada hubungan dengan jabatannya atas nama Tersangka RUDY ERAWAN (Bupati Halmahera). Sprin.Dik-12/ DIK.00/01/01/2018 Tanggal 16 Januari 2018.
89. Perkara TPPU yang dalam hubungannya dengan perbuatan menempatkan, mentransfer, mengalihkan, membelanjakan, membayarkan, menghibahkan, menitipkan, membawa ke luar negeri, mengubah bentuk, menukarkan, dengan mata uang atau surat berharga atau perbuatan lain atas Harta Kekayaan yang diketahui patut diduganya merupakan hasil Tindak Pidana Korupsi dengan tujuan menyembunyikan atau menyamarkan asal usul Harta Kekayaan dan atau menyembunyikan atau menyamarkan asal usul, sumber, lokasi, peruntukan, pengalihan hak-hak, atau kepemilikan yang sebenarnya atas Harta Kekayaan yang diketahuinya atau patut diduganya merupakan hasil tindak pidana korupsi yang dilakukan oleh Tersangka YUDI WIDIANA ADIA (Anggota Komisi V DPR RI periode 2014-2019). Sprin.Dik-13/ DIK.00/01/01/2018 Tanggal 19 Januari 2018.
90. Perkara TPK menerima hadiah atau janji terkait proyek-proyek di Dinas PUPR Provinsi Jambi tahun 2014-2017 dan penerimaan lainnya atas nama Tersangka ARFAN (Kabid Bina Marga Dinas PUPR Provinsi Jambi serta sebagai Pejabat Pembuat Komitmen yang merangkap Plt.Kepala Dinas PUPR Provinsi Jambi). Sprin.Dik-14/ DIK.00/01/01/2018 Tanggal 24 Januari 2018.
91. Perkara TPK menerima hadiah atau janji terkait proyek-proyek di Provinsi Jambi dan Penerimaan lainnya atas nama Tersangka ZUMI ZOLA ZULKIFLI (Gubernur Provinsi Jambi periode 2016-2021). Sprin.Dik-15/ DIK.00/01/01/2018 Tanggal 24 Januari 2018.

## Februari

1. Perkara TPK memberi sesuatu kepada pegawai negeri atau penyelenggara negara Nyono Suharli Wihandoko selaku Bupati Jombang periode 2013 s.d. 2018 terkait perizinan dan pengurusan penempatan jabatan di Pemerintahan Kabupaten Jombang atas nama tersangka INNA SILESTYOWATI (Plt Kepala Dinas Kesehatan Pemkab Jombang). Sprin.Dik/16/DIK.00/01/02/2018 Tgl. 4 Februari 2018.
2. Perkara TPK menerima hadiah atau janji dari Inna Silestyowati dan kawan-kawan terkait perizinan dan pengurusan penempatan jabatan di Pemerintahan Kabupaten Jombang atas nama tersangka NYONO SUHARLI WIHANDOKO (Bupati Jombang periode 2013 s.d. 2018). Sprin.Dik/17/DIK.00/01/02/2018 Tgl. 4 Februari 2018.

3. Perkara TPK memberi hadiah atau janji terkait pengadaan barang dan jasa di lingkungan Kabupaten Ngada kepada Marianus Sae selaku Bupati Ngada periode tahun 2010 sampai dengan tahun 2015 dan periode tahun 2016 sampai dengan tahun 2021 atas nama tersangka WILHELMUS IWAN ULUMBU alias BABA MIMING (Direktur utama PT Sinar 99 Permai – Swasta). Sprin.Dik/18/DIK.00/01/02/2018 Tanggal 12/02/2018.
4. Perkara TPK menerima hadiah atau janji terkait pengadaan barang dan jasa di lingkungan Kabupaten Ngada atas nama tersangka MARIANUS SAE (Bupati Ngada periode tahun 2010 s.d. Tahun 2015 dan periode 2016 s.d. Tahun 2021). Sprin.Dik/19/DIK.00/01/02/2018 Tanggal 12/02/2018.
5. Perkara TPK penyelenggara negara yang bersama-sama menerima hadiah atau janji padahal diketahui atau patut diduga bahwa hadiah atau janji tersebut diberikan untuk menggerakkan agar melakukan atau tidak melakukan sesuatu dalam jabatannya yang bertentangan dengan kewajibannya terkait dengan Proses Pembahasan dan Pengesahan RKA-K/L dalam APBN-P TA 2016 yang akan diberikan kepada Bakamla RI atas nama tersangka FAYAKHUN ANDRIADI (Anggota DPR RI Periode 2014-2019). Sprin.Dik/20/DIK.00/01/02/2018 Tanggal 12/02/2018.
6. Perkara TPK bersama-sama Asep Santika selaku Kabid Perizinan DPMPTSP Kabupaten Subang dan Data alias Dartta, yaitu menerima hadiah atau janji terkait perizinan PT PURA BINAKA MANDIRI dan PT ALFA SENTRA PROPERTY atas nama tersangka IMAS ARYUMNINGSIH (Bupati Subang Periode 2017-2018). Sprin.Dik/21/DIK.00/01/02/2018 Tanggal 14/02/2018.
7. Perkara TPK bersama-sama Imas Aryumningsih selaku Bupati Subang Periode 2017-2018 dan Data alias Dartta, yaitu menerima hadiah atau janji terkait perizinan PT PURA BINAKA MANDIRI dan PT Alfa Sentra Property dari Miftahudin dan kawan-kawan atas nama tersangka ASEP SANTIKA (Kabid Perizinan DPMPTSP Kabupaten Subang). Sprin.Dik/22/DIK.00/01/02/2018 Tanggal 14/02/2018.
8. Perkara TPK bersama-sama Imas Aryumningsih selaku Bupati Subang Periode 2017-2018 dan Asep Santika selaku Kabid Perizinan DPMPTSP Kabupaten Subang, yaitu menerima hadiah atau janji terkait perizinan PT PURA BINAKA MANDIRI dan PT ALFA SENTRA PROPERTY dari Miftahudin dan kawan-kawan atas nama tersangka DATA alias DARTTA (Swasta). Sprin.Dik/23/DIK.00/01/02/2018 Tanggal 14/02/2018.
9. Perkara TPK memberi hadiah atau janji terkait perizinan PT Pura Binaka Mandiri dan PT Alfa Sentra Property kepada Imas Aryumningsih selaku Bupati Subang periode 2017-2018 dan Asep Santika selaku Kabid Perizinan DPMPSTP Kabupaten Subang dan Data alias Dartta atas nama tersangka MIFTAHUDIN (Swasta). Sprin.Dik/24/DIK.00/01/02/2018 Tgl. 14 Februari 2018.
10. Perkara TPK penyelenggara negara yang secara bersama-sama menerima hadiah atau janji padahal diketahui atau patut diduga bahwa hadiah atau janji tersebut diberikan untuk menggerakkan agar melakukan atau tidak melakukan sesuatu dalam jabatannya yang bertentangan dengan kewajibannya terkait dengan persetujuan penandatanganan surat pernyataan sebagai persyaratan jaminan pinjaman daerah kabupaten lampung tengah kepada PT Sarana Multi Infrastruktur atas nama tersangka NATALIS SINAGA (Wakil Ketua I DPRD Kabupaten Lampung Tengah). Sprin.Dik/25/DIK.00/01/02/2018 Tgl. 15 Februari 2018.
11. Perkara TPK penyelenggara negara yang secara bersama-sama menerima hadiah atau janji padahal diketahui atau patut diduga bahwa hadiah atau janji tersebut diberikan untuk menggerakkan agar melakukan atau tidak melakukan sesuatu dalam jabatannya yang bertentangan dengan kewajibannya terkait dengan persetujuan penandatanganan surat pernyataan sebagai persyaratan jaminan pinjaman daerah kabupaten lampung tengah kepada PT Sarana Multi Infrastruktur atas nama tersangka RUSLIYANTO (Anggota DPRD Kabupaten Lampung Tengah). Sprin.Dik/26/DIK.00/01/02/2018 Tgl. 15 Februari 2018.
12. Perkara TPK penyelenggara negara yang secara bersama-sama memberi hadiah atau janji padahal diketahui atau patut diduga bahwa hadiah atau janji tersebut diberikan untuk menggerakkan agar melakukan atau tidak melakukan sesuatu dalam jabatannya yang bertentangan dengan

kewajibannya terkait dengan persetujuan penandatanganan surat pernyataan sebagai persyaratan jaminan pinjaman daerah kabupaten lampung tengah kepada PT Sarana Multi Infrastruktur atas nama tersangka TAUFIK RAHMAN (Kepala Bina Marga Lampung Tengah).

Sprin.Dik/27/DIK.00/01/02/2018 Tgl. 15 Februari 2018.

13. Perkara TPK penyelenggara negara yang secara bersama-sama memberi hadiah atau janji padahal diketahui atau patut diduga bahwa hadiah atau janji tersebut diberikan untuk menggerakkan agar melakukan atau tidak melakukan sesuatu dalam jabatannya yang bertentangan dengan kewajibannya terkait dengan persetujuan penandatanganan surat pernyataan sebagai persyaratan jaminan pinjaman daerah kabupaten lampung tengah kepada PT Sarana Multi Infrastruktur atas nama tersangka MUSTAFA (Bupati Kabupaten Lampung Tengah). Sprin.Dik/28/DIK.00/01/02/2018 Tgl. 15 Februari 2018.
14. Perkara TPPU dalam hubungannya dalam perbuatan menempatkan, mentransfer, mengalihkan, membelanjakan, membayarkan, menghibahkan, menitipkan, membawa ke luar negeri, mengubah bentuk, menukarkan dengan mata uang atau surat berharga atau perbuatan lain atas harta kekayaan yang diketahuinya atau patut diduganya merupakan hasil tindak pidana korupsi dengan tujuan menyembunyikan atau menyamarkan asal usul harta kekayaan dan atau menyembunyikan atau menyamarkan asal usul, sumber, lokasi, peruntukan, pengalihan hak-hak atau kepemilikan, yang sebenarnya atas harta kekayaan yang diketahuinya atau patut diduganya merupakan hasil TPK atas nama tersangka MUHTAR EPENDY (Swasta). Sprin.Dik/29/DIK.00/01/02/2018 Tgl. 19 Februari 2018.
15. Perkara TPK pelaksanaan pembangunan Dermaga Bongkar pada Kasawan Perdagangan Bebas dan Pelabuhan Bebas Sabang yang dibiayai Anggaran Pendapatan dan Belanja Negara (APBN) TA 2006 s.d. TA 2011 atas nama tersangka PT. NINDYA KARYA (persero) (Korporasi). Sprin.Dik/30/DIK.00/01/02/2018 Tgl. 19 Februari 2018.
16. Perkara TPK pelaksanaan pembangunan Dermaga Bongkar pada Kasawan Perdagangan Bebas dan Pelabuhan Bebas Sabang yang dibiayai Anggaran Pendapatan dan Belanja Negara (APBN) TA 2006 s.d. TA 2011 atas nama tersangka PT. TUAH SEJATI (Korporasi). Sprin.Dik/31/DIK.00/01/02/2018 Tgl. 19 Februari 2018.
17. Perkara TPK pengadaan tanah untuk Ruang Terbuka Hijau (RTH) pada Pemerintah Kota Bandung tahun 2012 dan 2013 atas nama tersangka HERY NURHAYAT (Kepala Dinas Pengelolaan Keuangan dan Aset Daerah (DPKAD) Pemerintah Kota Bandung sekaligus selaku Pengguna Anggaran (PA)) dan kawan-kawan. Sprin.Dik/32/DIK.00/01/02/2018 Tanggal 22/02/2018.
18. Perkara TPK secara bersama-sama atau turut serta terkait perbuatan Hery Nurhayat selaku Kepala Dinas Pengelolaan Keuangan dan Aset Daerah (DPKAD) Pemerintah Kota Bandung sekaligus selaku Pengguna Anggaran (PA) dalam pengadaan tanah untuk Ruang Terbuka Hijau (RTH) di Pemerintah Kota Bandung pada tahun 2012 dan 2013, atas nama tersangka TOMTOM DABBUL QOMAR (Anggota DPRD Kota Bandung Periode tahun 2009 – 2014) dan kawan-kawan. Sprin.Dik/33/DIK.00/01/02/2018 Tanggal 22/02/2018.
19. Perkara TPK secara bersama-sama atau turut serta terkait perbuatan Hery Nurhayat selaku Kepala Dinas Pengelolaan Keuangan dan Aset Daerah (DPKAD) Pemerintah Kota Bandung sekaligus selaku Pengguna Anggaran (PA) dalam pengadaan tanah untuk Ruang Terbuka Hijau (RTH) di Pemerintah Kota Bandung pada tahun 2012 dan 2013, atas nama tersangka KADAR SLAMET (Anggota DPRD Kota Bandung Periode tahun 2009 – 2014). Sprin.Dik/34/DIK.00/01/02/2018 Tanggal 22/02/2018.
20. Perkara TPK Pengadaan Paket Penerapan Kartu Tanda Penduduk Berbasis Nomor Induk Kependudukan Secara Nasional (KTP Elektronik) Tahun 2011 s.d 2012 pada Kementerian Dalam Negeri Republik Indonesia, bersama sama dengan Setya Novanto, Anang Sugiana Sudihardjo Selaku Direktur Utama PT Quadra Solution anggota Konsorsium PNRI, Andi Agustinus alias Andi Narogong, Irman selaku Direktur Jenderal Kependudukan dan Pencatatan Sipil Kementerian Dalam Negeri

Republik Indonesia dan Ir. Sugiharto, MM selaku Pejabat Pembuat Komitmen (PPK) Direktorat Jenderal Kependudukan dan Pencatatan Sipil Kementerian Dalam Negeri Republik Indonesia dan kawan-kawan atas nama tersangka IRVANTO HENDRA PAMBUDI CAHYO (mantan Direktur PT. Murakabi Sejahtera - Swasta). Sprin.Dik/35/DIK.00/01/02/2018 Tanggal 22/02/2018.

21. Perkara TPK Pengadaan Paket Penerapan Kartu Tanda Penduduk Berbasis Nomor Induk Kependudukan Secara Nasional (KTP Elektronik) Tahun 2011 s.d 2012 pada Kementerian Dalam Negeri Republik Indonesia, bersama sama dengan Setya Novanto, Anang Sugiana Sudihardjo selaku Direktur Utama PT Quadra Solution anggota Konsorsium PNRI, Andi Agustinus alias Andi Narogong, Irman selaku Direktur Jenderal Kependudukan dan Pencatatan Sipil Kementerian Dalam Negeri Republik Indonesia dan Ir. Sugiharto, MM selaku Pejabat Pembuat Komitmen (PPK) Direktorat Jenderal Kependudukan dan Pencatatan Sipil Kementerian Dalam Negeri Republik Indonesia dan kawan-kawan atas nama tersangka MADE OKA MASAGUNG (mantan pemimpin PT Gunung Agung - Swasta). Sprin.Dik/36/DIK.00/01/02/2018 Tanggal 22/02/2018.
22. Perkara TPK bersama-sama Fatmawaty Faqih, yang menerima hadiah atau janji terkait pengadaan barang dan jasa di Lingkungan Pemerintah Kota Kendari Tahun Anggaran 2017-2018 atas nama tersangka ADRIATMA DWI PUTRA (walikota Kendari Sulteng) dan Tersangka ASRUN (Swasta – Cagub Sulteng). Sprin.Dik/37/DIK.00/01/02/2018 Tgl. 28 Februari 2018.
23. Perkara TPK bersama-sama dengan Adriatma Dwi Putra selaku Walikota Kendari Sulteng dan Asrun, yang menerima hadiah atau janji terkait pengadaan barang dan jasa di Lingkungan Pemerintah Kota Kendari Tahun Anggaran 2017-2018 atas nama tersangka FATMAWATY FAQIH (Mantan Kepala Badan Pengelola Keuangan Daerah (BPKAD) Kendari). Sprin.Dik/38/DIK.00/01/02/2018 Tgl. 28 Februari 2018.
24. Perkara TPK memberi atau menjanjikan sesuatu kepada Adriatma Dwi Putra selaku Walikota Kendari Sulteng, Asrun dan Fatmawaty Faqih terkait pengadaan barang dan jasa di Lingkungan Pemerintah Kota Kendari Tahun Anggaran 2017-2018 atas nama tersangka HASMUN HAMZAH (Swasta). Sprin.Dik/39/DIK.00/01/02/2018 Tgl. 28 Februari 2018.

## Maret

1. Perkara TPK bersama-sama Tuti Atika selaku Panitera Pengganti pada Pengadilan Negeri Klas IA Khusus Tangerang, yaitu menerima hadiah atau janji terkait putusan perkara yang diserahkan kepadanya untuk diadili dari HM. Saipudin dan Agus Wiratno selaku Advokat pada Kantor Hukum HM. Saipudin dan Jokusa & Associates atas nama tersangka WAHYU WIDYA NURFITRI (Hakim pada Pengadilan Negeri Klas IA Khusus Tangerang). Sprin.Dik/40/DIK.00/01/03/2018 Tanggal 13/03/2018.
2. Perkara TPK bersama-sama Wahyu Widya Nurfitri selaku Hakim pada Pengadilan Negeri Klas IA Khusus Tangerang, yaitu menerima hadiah atau janji terkait putusan perkara yang diserahkan kepadanya untuk diadili dari HM. Saipudin dan Agus Wiratno selaku Advokat pada Kantor Hukum HM. Saipudin dan Jokusa & Associates atas nama tersangka TUTI ATIKA (Panitera Pengganti pada Pengadilan Negeri Klas IA Khusus Tangerang). Sprin.Dik/41/DIK.00/01/03/2018 Tanggal 13/03/2018.
3. Perkara TPK memberi hadiah atau janji kepada Wahyu Widya Nurfitri selaku Hakim pada Pengadilan Negeri Klas IA Khusus Tangerang bersama-sama Tuti Atika selaku Panitera Pengganti pada Pengadilan Negeri Klas IA Khusus Tangerang terkait putusan perkara yang diserahkan kepadanya untuk diadili atas nama tersangka AGUS WIRATNO (Advokat). Sprin.Dik/42/DIK.00/01/03/2018 Tanggal 13/03/2018.
4. Perkara TPK bersama-sama Agus Wiratno selaku Advokat pada Kantor Hukum HM. SAIPUDIN dan JOKUSA & ASSOCIATES yaitu memberi hadiah atau janji kepada Wahyu Widya Nurfitri selaku Hakim pada Pengadilan Negeri Klas IA Khusus Tangerang bersama-sama Tuti Atika selaku Panitera Pengganti pada Pengadilan Negeri Klas IA Khusus Tangerang terkait putusan perkara yang

diserahkan kepadanya untuk diadili atas nama tersangka HM. SAIPUDIN (Advokat).

Sprin.Dik/43/DIK.00/01/03/2018 Tanggal 13/03/2018.

5. Perkara TPK bersama-sama dengan Zainal Mus terkait Pengadaan Pembebasan Lahan Bandara Bobong pada Anggaran Pendapatan dan Belanja Daerah (APBD) TA 2009 di Kabupaten Kepulauan Sula atas nama tersangka AHMAD HIDAYAT MUS (Bupati Kepulauan Sula periode 2005-2010). Sprin.Dik/44/DIK.00/01/03/2018 Tanggal 13/03/2018.  
120. Perkara TPK bersama-sama dengan Ahmad Hidayat Mus selaku Bupati Kepulauan Sula periode 2005-2010 terkait Pengadaan Pembebasan Lahan Bandara Bobong pada Anggaran Pendapatan dan Belanja Daerah (APBD) TA 2009 di Kabupaten Kepulauan Sula atas nama tersangka ZAINAL MUS (Ketua DPRD Kabupaten Kepulauan Sula 2009-2014, Bupati Banggai Kepulauan Sulawesi Tengah periode 2017-2022). Sprin.Dik/45/DIK.00/01/03/2018 Tanggal 13/03/2018.
6. Perkara TPK menerima hadiah atau janji terkait Pembahasan APBD-P Pemerintah Kota Malang Tahun Anggaran 2015 dari H. Moch. Anton selaku Walikota Malang periode tahun 2013 s.d 2018 dan kawan-kawan atas nama tersangka SULIK LESTYOWATI, SH,MH, tersangka Drs. ABD. HAKIM, tersangka Ir. BAMBANG SUMARTO, tersangka IMAM FAUZI, S.Ag, tersangka SYAIFUL RUSDI, S.Pd,M.KPd dan tersangka TRI YUDIANI, S.Sos (masing-masing selaku anggota DPRD Kota Malang Periode 2014-2019). Sprin.Dik/46/DIK.00/01/03/2018 Tanggal 16/03/2018.
7. Perkara TPK menerima hadiah atau janji terkait Pembahasan APBD-P Pemerintah Kota Malang Tahun Anggaran 2015 dari H. Moch. Anton selaku Walikota Malang periode tahun 2013 s.d 2018 atas nama tersangka SUPRAPTO, SH, tersangka SAHRAWI, SS, M.Hum, tersangka H. MOHAN KATELU, tersangka Drs. SALAMET, tersangka H.M. ZAINUDDIN AS dan tersangka WIWIK HENDRI ASTUTI (masing-masing selaku anggota DPRD Kota Malang Periode 2014-2019). Sprin.Dik/47/DIK.00/01/03/2018 Tanggal 16/03/2018.
8. Perkara TPK yaitu memberi hadiah atau janji terkait Pembahasan APBD-P Pemerintah Kota Malang Tahun Anggaran 2015 kepada Moch. Arief Wicaksono selaku Ketua DPRD Kota Malang Periode 2014-2019 atas nama tersangka H. MOCH. ANTON (Walikota Malang periode tahun 2013 s.d 2018). Sprin.Dik/48/DIK.00/01/03/2018 Tanggal 16/03/2018.
9. Perkara TPK yaitu menerima hadiah atau janji terkait Pembahasan APBD-P Pemerintah Kota Malang Tahun Anggaran 2015 dari H. Moch. Anton selaku Walikota Malang periode tahun 2013 s.d 2018 atas nama tersangka RAHAYU SUGIARTI, S.Sos, tersangka YA'QUD ANANDA GUDBAN, SS,SST.Par,MM, tersangka HERY SUBIANTONO, tersangka SUKARNO, tersangka Dra. Hj. HERI PUDJI UTAMI, M.AP dan tersangka H. ABD. RACHMAN (masing-masing selaku anggota DPRD Kota Malang Periode 2014-2019). Sprin.Dik/49/DIK.00/01/03/2018 Tanggal 16/03/2018.
10. Perkara TPK memberi hadiah atau janji kepada Parlin Purba selaku Kepala Seksi III Intelejen Kejaksaan Tinggi Bengkulu dan Kawan-kawan, terkait pengumpulan data atau bahan keterangan atas pelaksanaan proyek-proyek di Balai Wilayah Sungai Sumatera VII Provinsi Bengkulu Tahun Anggaran 2015 dan 2016 atas nama tersangka APIP KUSNADI (PNS BWSS VII Bengkulu) bersama-sama dengan M. FAUZI NS (Kepala Satker Pelaksanaan Jaringan Pemanfaatan Air Sumatera VII Provinsi Bengkulu pada 2014) dan EDI JUNAIDI (Pejabat Pembuat Komitmen (PPK) di Balai Wilayah Sungai Sumatera (BWSS) VII). Sprin.Dik/50/DIK.00/01/03/2018 Tanggal 20/03/2018.
11. Perkara TPK menerima hadiah atau janji dari Gatot Pujo Nugroho selaku Gubernur Provinsi Sumatera Utara terkait fungsi dan kewenangan tersangka selaku Anggota DPRD Provinsi Sumatera Utara periode 2009 s/d 2014 dan/atau periode 2014 s/d 2019 atas nama tersangka RIJAL SIRAIT, RINAWATI SIANTURI, ROOSLYNDA MARPAUNG, FADLY NURZAL (masing-masing selaku Anggota DPRD Provinsi Sumatera Utara periode 2009 s/d 2014 dan/atau periode 2014 s/d 2019). Sprin.Dik/51/DIK.00/01/03/2018 Tanggal 28/03/2018.
12. Perkara TPK menerima hadiah atau janji dari Gatot Pujo Nugroho selaku Gubernur Provinsi Sumatera Utara terkait fungsi dan kewenangan selaku Anggota DPRD Provinsi Sumatera Utara

periode 2009 s/d 2014 dan/atau periode 2014 s/d 2019 atas nama tersangka ABU BOKAR TAMBAK, ENDA MORA LUBIS, M. YUSUF SIREGAR (masing-masing Anggota DPRD Provinsi Sumatera Utara periode 2009 s/d 2014 dan/atau periode 2014 s/d 2019).

Sprin.Dik/52/DIK.00/01/03/2018 Tanggal 28/03/2018.

13. Perkara TPK menerima hadiah atau janji dari Gatot Pujo Nugroho selaku Gubernur Provinsi Sumatera Utara terkait fungsi dan kewenangan Anggota DPRD Provinsi Sumatera Utara periode 2009 s/d 2014 dan/atau periode 2014 s/d 2019 atas nama tersangka MUHAMMAD FAISAL (Anggota DPRD Provinsi Sumatera Utara periode 2009 s/d 2014 dan/atau periode 2014 s/d 2019). Sprin.Dik/53/DIK.00/01/03/2018 Tanggal 28/03/2018.
14. Perkara TPK menerima hadiah atau janji dari Gatot Pujo Nugroho selaku Gubernur Provinsi Sumatera Utara yang terkait fungsi dan kewenangan selaku Anggota DPRD Provinsi Sumatera Utara periode 2009 s/d 2014 dan/atau periode 2014 s/d 2019 atas nama tersangka DTM ABUL HASAN MATURIDI, BILLER PASARIBU, RICHARD EDDY MARSAUT LINGGA, SYAFRIDA FITRIE (masing-masing selaku Anggota DPRD Provinsi Sumatera Utara periode 2009 s/d 2014 dan/atau periode 2014 s/d 2019). Sprin.Dik/54/DIK.00/01/03/2018 Tanggal 28/03/2018.
15. Perkara TPK menerima hadiah atau janji dari Gatot Pujo Nugroho selaku Gubernur Provinsi Sumatera Utara terkait fungsi dan kewenangan selaku Anggota DPRD Provinsi Sumatera Utara periode 2009 s/d 2014 dan/atau periode 2014 s/d 2019 atas nama tersangka RAHMIANNA DELIMA PULUNGAN (Anggota DPRD Provinsi Sumatera Utara periode 2009 s/d 2014 dan/atau periode 2014 s/d 2019). Sprin.Dik/55/DIK.00/01/03/2018 Tanggal 28/03/2018.
16. Perkara TPK menerima hadiah atau janji dari Gatot Pujo Nugroho selaku Gubernur Provinsi Sumatera Utara terkait fungsi dan kewenangan selaku Anggota DPRD Provinsi Sumatera Utara periode 2009 s/d 2014 dan/atau periode 2014 s/d 2019 atas nama tersangka ARIFIN NAINGGOLAN, MUSTOFAWIYAH, SOPAR SIBURIAN, ANALISMAN ZALUKHU (masing-masing selaku Anggota DPRD Provinsi Sumatera Utara periode 2009 s/d 2014 dan/atau periode 2014 s/d 2019). Sprin.Dik/56/DIK.00/01/03/2018 Tanggal 28/03/2018.
17. Perkara TPK menerima hadiah atau janji dari Gatot Pujo Nugroho selaku Gubernur Provinsi Sumatera Utara terkait fungsi dan kewenangan anggota DPRD Provinsi Sumatera Utara periode 2009 s/d 2014 dan/atau periode 2014 s/d 2019 atas nama tersangka TONNIES SIANTURI, TOHONAN SILALAH, MURNI ELIESER VERAWATY MUNTHE, DERMAWAN SEMBIRING, ARLENE MANURUNG, SYAHRIAL HARAHAH (masing-masing selaku Anggota DPRD Provinsi Sumatera Utara periode 2009 s/d 2014 dan/atau periode 2014 s/d 2019). Sprin.Dik/57/DIK.00/01/03/2018 Tanggal 28/03/2018.
18. Perkara TPK menerima hadiah atau janji dari Gatot Pujo Nugroho selaku Gubernur Provinsi Sumatera Utara terkait fungsi dan kewenangan anggota DPRD Provinsi Sumatera Utara periode 2009 s/d 2014 dan/atau periode 2014 s/d 2019 atas nama tersangka RESTU KURNIAWAN SARUMAHA, WASHINGTON PANE, JOHN HUGO SILALAH, FERRY SUANDO TANURAY KABAN (masing-masing selaku Anggota DPRD Provinsi Sumatera Utara periode 2009 s/d 2014 dan/atau periode 2014 s/d 2019). Sprin.Dik/58/DIK.00/01/03/2018 Tanggal 28/03/2018.
19. Perkara TPK menerima hadiah atau janji dari Gatot Pujo Nugroho selaku Gubernur Provinsi Sumatera Utara terkait fungsi dan kewenangan anggota DPRD Provinsi Sumatera Utara periode 2009 s/d 2014 dan/atau periode 2014 s/d 2019 atas nama tersangka TUNGGUL SIAGIAN, FAHRU ROZI, TAUFAN AGUNG GINTING (masing-masing selaku Anggota DPRD Provinsi Sumatera Utara periode 2009 s/d 2014 dan/atau periode 2014 s/d 2019). Sprin.Dik/59/DIK.00/01/03/2018 Tanggal 28/03/2018.
20. Perkara TPK menerima hadiah atau janji dari Gatot Pujo Nugroho selaku Gubernur Provinsi Sumatera Utara terkait fungsi dan kewenangan anggota DPRD Provinsi Sumatera Utara periode 2009 s/d 2014 dan/atau periode 2014 s/d 2019 atas nama tersangka TIAISAH RITONGA (Anggota



DPRD Provinsi Sumatera Utara periode 2009 s/d 2014 dan/atau periode 2014 s/d 2019).

Sprin.Dik/60/DIK.00/01/03/2018 Tanggal 28/03/2018.

21. Perkara TPK menerima hadiah atau janji dari Gatot Pujo Nugroho selaku Gubernur Provinsi Sumatera Utara terkait fungsi dan kewenangan anggota DPRD Provinsi Sumatera Utara periode 2009 s/d 2014 dan/atau periode 2014 s/d 2019 atas nama tersangka HELMIATI, MUSLIM SIMBOLON, SONNY FIRDAUS (masing-masing selaku Anggota DPRD Provinsi Sumatera Utara periode 2009 s/d 2014 dan/atau periode 2014 s/d 2019). Sprin.Dik/61/DIK.00/01/03/2018 Tanggal 28/03/2018.
22. Perkara TPK menerima hadiah atau janji dari Gatot Pujo Nugroho selaku Gubernur Provinsi Sumatera Utara terkait fungsi dan kewenangan anggota DPRD Provinsi Sumatera Utara periode 2009 s/d 2014 dan/atau periode 2014 s/d 2019 atas nama tersangka PASIRUDDIN DAULAY, ELEZARO DUHA, MUSDALIFAH, TAHAN MANAHAN PANGGABEAN (masing-masing selaku Anggota DPRD Provinsi Sumatera Utara periode 2009 s/d 2014 dan/atau periode 2014 s/d 2019). Sprin.Dik/62/DIK.00/01/03/2018 Tanggal 28/03/2018.

## April

1. Perkara TPPU terkait perbuatan menyembunyikan atau menyamarkan asal usul, sumber, lokasi, peruntukan pengalihan hak-hak, atau kepemilikan yang sebenarnya atau Harta Kekayaan yang diketahuinya atau patut diduganya merupakan hasil tindak pidana korupsi, dan atau menerima atau menguasai penempatan, penransferan, pembayaran, hibah, sumbangan, penitipan, penukaran, atau menggunakan Harta Kekayaan yang diketahuinya atau patut diduganya merupakan hasil tindak pidana korupsi pada tahun 2016-2017 atas nama tersangka yang dilakukan oleh tersangka PT PUTRA RAMADHAN (PT TRADHA). Sprin.Dik/63/DIK.00/01/04/2018 Tanggal 06/04/2018.
2. Perkara TPK berupa perbuatan memberi hadiah atau janji kepada Abubakar selaku Bupati Kabupaten Bandung Barat periode 2013-2018 bersama-sama dengan Tersangka Weti Lembanawati dan Tersangka Adiyoto mengingat kekuasaan atau wewenang yang melekat pada jabatan atau kedudukannya atau supaya berbuat atau tidak berbuat sesuatu dalam jabatannya yang bertentangan dengan kewajibannya atau berhubungan dengan sesuatu yang bertentangan dengan kewajiban, dilakukan atau tidak dilakukan dalam jabatannya atas nama tersangka ASEP HIKAYAT (Badan Kepegawaian dan Pengembangan Sumber Daya Manusia (BKPSDM). Sprin.Dik/64/DIK.00/01/04/2018 Tanggal 11/04/2018.
3. Perkara TPK berupa perbuatan menerima hadiah atau janji dari Asep Hikayat dan kawan-kawan, bersama-sama dengan Tersangka Abubakar selaku Bupati Kabupaten Bandung Barat periode 2013-2018 padahal diketahui atau patut diduga, bahwa hadiah atau janji tersebut diberikan karena kekuasaan atau kewenangan yang berhubungan dengan jabatannya atau diberikan untuk menggerakkan agar melakukan atau tidak melakukan sesuatu dalam jabatannya, atau disebabkan karena telah melakukan atau tidak melakukan sesuatu dalam jabatannya atas nama Tersangka WETI LEMBANAWATI (Kepala Dinas Perdagangan dan Perindustrian (Disperindag)) dan Tersangka ADIYOTO (Kepala Badan Perencanaan Pembangunan, Penelitian dan Pengembangan Daerah (Bappelitbangda)). Sprin.Dik/65/DIK.00/01/04/2018 Tanggal 11/04/2018.
4. Perkara TPK berupa perbuatan menerima hadiah atau janji dari Asep Hikayat dan kawan-kawan, bersama-sama dengan Tersangka Weti Lembanawati dan Tersangka Adiyoto padahal diketahui atau patut diduga, bahwa hadiah atau janji tersebut diberikan karena kekuasaan atau kewenangan yang berhubungan dengan jabatannya atau diberikan untuk menggerakkan agar melakukan atau tidak melakukan sesuatu dalam jabatannya, atau disebabkan karena telah melakukan atau tidak melakukan sesuatu dalam jabatannya atas nama Tersangka ABUBAKAR (Bupati Kabupaten Bandung Barat periode 2013-2018). Sprin.Dik/66/DIK.00/01/04/2018 Tanggal 11/04/2018.

5. Perkara TPK berupa Penerimaan Hadiah atau Janji yang diberikan oleh Ockyanto selaku Permit and Regulatory Division Head PT. Tower Bersama Infrastructure (Tower Bersama Group) dan Onggo Wijaya selaku Direktur Operasi PT. Profesional Telekomunikasi Indonesia (Protelindo) terkait dengan Pengurusan Izin Prinsip Pemanfaatan Ruang (IPPR) dan Izin Mendirikan Bangunan (IMB) atas Pembangunan Menara Telekomunikasi di Kabupaten Mojokerto Tahun 2015 atas nama tersangka MUSTOFA KAMAL PASA (Bupati Mojokerto). Sprin.Dik/67/DIK.00/01/04/2018 Tanggal 18/04/2018.
6. Perkara TPK berupa Pemberian Hadiah atau Janji kepada Mustofa Kamal Pasa selaku Bupati Mojokerto terkait dengan Pengurusan Izin Prinsip Pemanfaatan Ruang (IPPR) dan Izin Mendirikan Bangunan (IMB) atas Pembangunan Menara Telekomunikasi di Kabupaten Mojokerto Tahun 2015 atas nama tersangka ONGGO WIJAYA (Direktur Operasi PT. Profesional Telekomunikasi Indonesia (Protelindo)). Sprin.Dik/68/DIK.00/01/04/2018 Tanggal 18/04/2018.
7. Perkara TPK berupa Pemberian Hadiah atau Janji kepada Mustofa Kamal Pasa selaku Bupati Mojokerto terkait dengan Pengurusan Izin Prinsip Pemanfaatan Ruang (IPPR) dan Izin Mendirikan Bangunan (IMB) atas Pembangunan Menara Telekomunikasi di Kabupaten Mojokerto Tahun 2015 atas nama tersangka OCKYANTO (Permit and Regulatory Division Head PT. Tower Bersama Infrastructure (Tower Bersama Group)). Sprin.Dik/69/DIK.00/01/04/2018 Tanggal 18/04/2018.
8. Perkara TPK bersama-sama Ir. Zaenal Abidin, MM, MT, yaitu menerima gratifikasi yang berhubungan dengan jabatannya dan yang berlawanan dengan kewajiban atau tugasnya atas nama tersangka MUSTOFA KAMAL PASA (Bupati Mojokerto periode Tahun 2010-2015 dan Tahun 2016-2021). Sprin.Dik/70/DIK.00/01/04/2018 Tanggal 18/04/2018.
9. Perkara TPK bersama-sama Mustofa Kamal Pasa selaku Bupati Mojokerto periode tahun 2010-2015 dan tahun 2016-2021, yaitu menerima gratifikasi yang berhubungan dengan jabatannya dan yang berlawanan dengan kewajiban atau tugasnya atas nama tersangka ZAENAL ABIDIN (Kepala Dinas Pekerjaan Umum dan Penataan Ruang (PUPR) Mojokerto). Sprin.Dik/71/DIK.00/01/04/2018 Tanggal 18/04/2018.
10. Perkara TPK memberi hadiah atau janji terkait fungsi pengawasan oleh Dewan Perwakilan Rakyat Daerah Provinsi Jawa Timur terhadap pelaksanaan Peraturan Daerah dan Penggunaan Anggaran di Provinsi Jawa Timur Tahun Anggaran 2016-2017 atas nama tersangka M. SAMSUL ARIFIEN (Kepala Dinas Perkebunan Provinsi Jawa Timur). Sprin.Dik/72/DIK.00/01/04/2018 Tanggal 27/04/2018.
11. Perkara TPK memberi hadiah atau janji terkait fungsi pengawasan oleh Dewan Perwakilan Rakyat Daerah Provinsi Jawa Timur terhadap pelaksanaan Peraturan Daerah dan Penggunaan Anggaran di Provinsi Jawa Timur Tahun Anggaran 2016-2017 atas nama tersangka MOCH. ARDI PRASETIWAN (Kepala Dinas Perindustrian dan Perdagangan Provinsi Jawa Timur). Sprin.Dik/73/DIK.00/01/04/2018 Tanggal 27/04/2018.
12. Perkara TPK memberi atau menjanjikan sesuatu kepada Pegawai Negeri atau Penyelenggara Negara terkait usulan Dana Perimbangan Keuangan Daerah pada RAPBN-P Tahun Anggaran 2018 atas nama tersangka AHMAD GHIAST (Swasta). Sprin.Dik/74/DIK.00/01/05/2018 Tanggal 05/05/2018.
13. Perkara TPK Penerimaan Hadiah atau Janji yang dilakukan oleh Tersangka H. Amin Santono selaku Anggota Dewan Perwakilan Rakyat Republik Indonesia (DPR-RI) periode Tahun 2014-2019 terkait usulan Dana Perimbangan Keuangan Daerah pada RAPBN-P Tahun Anggaran 2018 atas nama tersangka H. AMIN SANTONO (Anggota Dewan Perwakilan Rakyat Republik Indonesia (DPR-RI)). Sprin.Dik/75/DIK.00/01/05/2018 Tanggal 05/05/2018.
14. Perkara TPK Penerimaan Hadiah atau Janji yang dilakukan oleh Tersangka Eka Kamaluddin, S.Psi terkait usulan Dana Perimbangan Keuangan Daerah pada RAPBN-P Tahun Anggaran 2018 atas nama tersangka EKA KAMALUDDIN (Swasta). Sprin.Dik/76/DIK.00/01/05/2018 Tanggal 05/05/2018.

15. Perkara TPK Penerimaan Hadiah atau Janji terkait usulan Dana Perimbangan Keuangan Daerah pada RAPBN-P Tahun Anggaran 2018 atas nama tersangka YAYA PURNOMO (Kepala Seksi Pengembangan Pendanaan Kawasan Perumahan dan Pemukiman pada Direktorat Jenderal Perimbangan Keuangan Kementerian Keuangan Republik Indonesia). Sprin.Dik/77/DIK.00/01/05/2018 Tanggal 05/05/2018.
16. Perkara TPK bersama-sama dengan Miftahudin yaitu memberi hadiah atau janji terkait perizinan PT Pura Binaka Mandiri dan PT Alfa Sentra Property kepada Hj. Imas Aryumningsih S.E selaku Bupati Subang periode 2017-2018, Asep Santika selaku Kabid Perizinan DPMPSTSP Kabupaten Subang, dan Data alias Darto, atas nama tersangka PUSPA SUKRISNA alias ASUN alias KOH ASUN (Swasta). Sprin.Dik/78/DIK.00/01/05/2018 Tanggal 07/05/2018.
17. Perkara TPK setiap orang yang secara bersama-sama memberi atau menjanjikan sesuatu kepada pegawai negeri atau penyelenggara negara dengan maksud supaya pegawai negeri atau penyelenggara negara tersebut berbuat atau tidak berbuat sesuatu dalam jabatannya, yang bertentangan dengan kewajibannya atau memberikan hadiah atau janji kepada pegawai negeri dengan mengingat kekuasaan atau wewenang yang melekat pada jabatan atau kedudukannya, atau oleh pemberi hadiah atau janji dianggap melekat pada jabatan atau kedudukannya terkait dengan pelaksanaan pekerjaan dalam program pembangunan infrastruktur pada Kementerian Pekerjaan Umum dan Perumahan Rakyat atas nama tersangka HONG ARTA JOHN ALFRED (PT Sharleen Raya (JECO Group) – Swasta). Sprin.Dik/79/DIK.00/01/05/2018 Tanggal 08/05/2018.
18. Perkara TPK penyidikan dugaan tindak pidana korupsi memberi hadiah atau janji kepada Dirwan alias Dirwan Mahmud selaku Bupati Bengkulu Selatan Periode 2016-2021, Hendrati dan Nursilawati, dalam rangka mendapatkan Proyek di Kabupaten Bengkulu Selatan Tahun Anggaran 2018 atas nama tersangka JUHARI Alias JUKAK (Dirut CV. Bayu - Swasta). Sprin.Dik/80/DIK.00/01/05/2018 Tanggal 16/05/2018.
19. Perkara TPK menerima hadiah atau janji terkait proyek di Kabupaten Bengkulu Selatan atas nama tersangka DIRWAN Alias DIRWAN MAHMUD (Bupati Bengkulu Selatan periode 2016-2021). Sprin.Dik/81/DIK.00/01/05/2018 Tanggal 16/05/2018.
20. Perkara TPK bersama-sama dengan Dirwan alias Dirwan Mahmud selaku Bupati Bengkulu Selatan menerima hadiah atau janji dari Juhari alias Jukak terkait proyek di Kabupaten Bengkulu Selatan atas nama tersangka HENDRATI (Istri Bupati Bengkulu Selatan - Swasta). Sprin.Dik/82/DIK.00/01/05/2018 Tanggal 16/05/2018.
21. Perkara TPK bersama-sama dengan Dirwan alias Dirwan Mahmud selaku Bupati Bengkulu Selatan menerima hadiah atau janji dari Juhari alias Jukak terkait proyek di Kabupaten Bengkulu Selatan atas nama tersangka NURSILAWATI (Kasi Dinas Kesehatan Bengkulu Selatan). Sprin.Dik/83/DIK.00/01/05/2018 Tanggal 16/05/2018.
22. Perkara TPK memberi hadiah atau janji kepada Agus Feisal Hidayat selaku Bupati Buton Selatan periode 2017-2022, terkait proyek pekerjaan di Pemda Kabupaten Buton Selatan, atas nama tersangka TONY KONGRES Alias ACUCU (Swasta/ Kontraktor PT. BBM (PT. Barokah Batauga Mandiri). Sprin.Dik/84/DIK.00/01/05/2018 Tanggal 24/05/2018.
23. Perkara TPK menerima hadiah atau janji padahal diketahui atau patut diduga hadiah atau janji tersebut diberikan untuk menggerakkan agar melakukan atau tidak melakukan sesuatu dalam jabatannya atau karena telah melakukan atau tidak melakukan sesuatu dalam jabatannya, yang bertentangan dengan kewajibannya terkait proyek pekerjaan di Pemda Kabupaten Buton Selatan atas nama tersangka AGUS FEISAL HIDAYAT (Bupati Buton Selatan periode 2017-2022). Sprin.Dik/85/DIK.00/01/05/2018 Tanggal 24/05/2018.

## Juni

1. Perkara TPK memberi hadiah atau janji kepada Tasdi selaku Bupati Purbalingga periode tahun 2016 sampai dengan tahun 2021 terkait pengadaan barang dan jasa di lingkungan Pemerintah Kabupaten

- Purbalingga atas nama tersangka LIBRATA NABABAN (Kontraktor - Swasta) bersama-sama dengan tersangka ARDIRAWINATA NABABAN (Kontraktor - Swasta). Sprin.Dik/86/DIK.00/01/06/2018 Tanggal 05/06/2018.
2. Perkara TPK memberi hadiah atau janji kepada Tasdi selaku Bupati Purbalingga periode tahun 2016 sampai dengan tahun 2021 terkait pengadaan barang dan jasa di lingkungan Pemerintah Kabupaten Purbalingga atas nama tersangka HAMDANI KOSEN (Kontraktor - Swasta). Sprin.Dik/87/DIK.00/01/06/2018 Tanggal 05/06/2018.
  3. Perkara TPK menerima hadiah atau janji terkait pengadaan barang dan jasa di lingkungan Pemerintah Kabupaten Purbalingga serta penerimaan lainnya atas nama tersangka TASDI (Bupati Purbalingga periode tahun 2016 sampai dengan tahun 2021). Sprin.Dik/88/DIK.00/01/06/2018 Tanggal 05/06/2018.
  4. Perkara TPK bersama-sama dengan Tasdi selaku Bupati Purbalingga periode tahun 2016 sampai dengan tahun 2021 menerima hadiah atau janji terkait pengadaan barang dan jasa di lingkungan Pemerintah Kabupaten Purbalingga serta penerimaan lainnya atas nama tersangka HADI ISWANTO (Kepala Bagian Layanan Pengadaan Kabupaten Purbalingga). Sprin.Dik/89/DIK.00/01/06/2018 Tanggal 05/06/2018.
  5. Perkara TPK memberi hadiah atau janji kepada Syahri Mjulyo selaku Bupati Tulungagung periode 2013-2018 dan kawan-kawan, terkait proyek pekerjaan di Pemda Kabupaten Tulungagung dan memberi hadiah atau janji kepada Muh. Samanhudi Anwar selaku Walikota Blitar periode 2016-2021 dan Bambang Purnomo, terkait proyek pekerjaan di Pemda Kota Blitar atas nama tersangka SUSILO PRABOWO Alias EMBUN (Kontraktor - Swasta). Sprin.Dik/90/DIK.00/01/06/2018 Tanggal 07/06/2018.
  6. Perkara TPK menerima hadiah atau janji padahal diketahui atau patut diduga hadiah atau janji tersebut diberikan untuk menggerakkan agar melakukan atau tidak melakukan sesuatu dalam jabatannya atau karena telah melakukan atau tidak melakukan sesuatu dalam jabatannya, yang bertentangan dengan kewajibannya terkait proyek pekerjaan di Pemda Kabupaten Tulungagung atas nama tersangka SYAHRI MULYO (Bupati Tulungagung periode 2013-2018) bersama-sama dengan tersangka AGUNG PRAYITNO (Swasta). Sprin.Dik/91/DIK.00/01/06/2018 Tanggal 07/06/2018.
  7. Perkara TPK bersama-sama dengan Syahri Mulyo selaku Bupati Tulungagung periode 2013-2018 menerima hadiah atau janji padahal diketahui atau patut diduga hadiah atau janji tersebut diberikan untuk menggerakkan agar melakukan atau tidak melakukan sesuatu dalam jabatannya atau karena telah melakukan atau tidak melakukan sesuatu dalam jabatannya, yang bertentangan dengan kewajibannya terkait proyek pekerjaan di Pemda Kabupaten Tulungagung atas nama tersangka SUTRISNO (Kepala Dinas Pekerjaan Umum dan Penataan Ruang (PUPR) Tulungagung). Sprin.Dik/92/DIK.00/01/06/2018 Tanggal 07/06/2018.
  8. Perkara TPK menerima hadiah atau janji dari Susilo Prabowo alias Embun, padahal diketahui atau patut diduga bahwa hadiah atau janji tersebut diberikan karena kekuasaan atau kewenangan yang berhubungan dengan jabatannya atau diberikan untuk menggerakkan agar melakukan atau tidak melakukan sesuatu dalam jabatannya, atau disebabkan karena telah melakukan atau tidak melakukan sesuatu dalam jabatannya, yang bertentangan dengan kewajibannya terkait proyek pekerjaan di Pemda Kota Blitar atas nama tersangka SAMANHUDI ANWAR (Walikota Blitar periode 2016-2021) bersama-sama dengan tersangka BAMBANG PURNOMO (Swasta). Sprin.Dik/93/DIK.00/01/06/2018 Tanggal 07/06/2018.

## Juli

1. Perkara TPK memberi dan menjanjikan sesuatu kepada pegawai negeri atau penyelenggara negara dengan maksud untuk mendapatkan pengesahan RAPBD Provinsi Jambi Tahun Anggaran 2017 dan

- 2018 atas nama tersangka ZUMI ZOLA ZULKIFLI (Gubernur Provinsi Jambi periode 2016-2021). Sprin.Dik/94/DIK.00/01/07/2018 Tanggal 02/07/2018.
2. Perkara TPK memberi hadiah atau janji kepada drh. H. Irwandi Yusuf, M.Sc selaku Gubernur Provinsi Aceh periode tahun 2017-2022 bersama-sama Hendri Yuzal dan T. Saiful Bahri terkait Pengalokasian dan Penyaluran Dana Otonomi Khusus Aceh (DOKA) Tahun Anggaran 2018 untuk Kabupaten Bener Meriah pada Pemerintah Provinsi Aceh atas nama tersangka AHMADI, SE (Bupati Bener Meriah periode Tahun 2017-2022). Sprin.Dik/95/DIK.00/01/07/2018 Tanggal 04/07/2018.
  3. Perkara TPK bersama-sama Hendri Yuzal dan T. Saiful Bahri, yaitu menerima hadiah atau janji dari Ahmadi, SE selaku Bupati Bener Meriah periode tahun 2017-2022 terkait Pengalokasian dan Penyaluran Dana Otonomi Khusus Aceh (DOKA) Tahun Anggaran 2018 untuk Kabupaten Bener Meriah pada Pemerintah Provinsi Aceh atas nama tersangka drh. H. IRWANDI YUSUF, M.Sc (Gubernur Provinsi Aceh). Sprin.Dik/96/DIK.00/01/07/2018 Tanggal 04/07/2018.
  4. Perkara TPK bersama-sama Hendri Yuzal dan drh. H. Irwandi Yusuf, M.Sc selaku Gubernur Provinsi Aceh periode tahun 2017-2022, yaitu menerima hadiah atau janji dari Ahmadi, SE selaku Bupati Bener Meriah periode tahun 2017-2022 terkait Pengalokasian dan Penyaluran Dana Otonomi Khusus Aceh (DOKA) Tahun Anggaran 2018 untuk Kabupaten Bener Meriah pada Pemerintah Provinsi Aceh atas nama tersangka T. SAIFUL BAHRI (Swasta). Sprin.Dik/97/DIK.00/01/07/2018 Tanggal 04/07/2018.
  5. Perkara TPK bersama-sama T. Saiful Bahri dan drh. H. Irwandi Yusuf, M.Sc selaku Gubernur Provinsi Aceh periode tahun 2017-2022, yaitu menerima hadiah atau janji dari Ahmadi, SE selaku Bupati Bener Meriah periode tahun 2017-2022 terkait Pengalokasian dan Penyaluran Dana Otonomi Khusus Aceh (DOKA) Tahun Anggaran 2018 untuk Kabupaten Bener Meriah pada Pemerintah Provinsi Aceh atas nama tersangka HENDRI YUZAL (Ajudan Gubernur Aceh). Sprin.Dik/98/DIK.00/01/07/2018 Tanggal 04/07/2018.
  6. Perkara TPK yaitu memberi hadiah atau janji kepada pegawai negeri atau penyelenggara negara Eni Maulani Saragih selaku Anggota DPR RI periode 2014 s.d. 2019 terkait kesepakatan kontrak kerjasama Pembangunan PLTU Riau-1 atas nama tersangka JOHANES BUDISUTRISNO KOTJO (Swasta). Sprin.Dik/99/DIK.00/01/07/2018 Tanggal 14/07/2018.
  7. Perkara TPK yaitu menerima hadiah atau janji dari Johannes Budisutrisno Kotjo terkait kesepakatan kontrak kerjasama Pembangunan PLTU Riau-1 atas nama tersangka ENI MAULANI SARAGIH (Anggota DPR RI periode 2014 s.d. 2019). Sprin.Dik/100/DIK.00/01/07/2018 Tanggal 14/07/2018.
  8. Perkara TPK memberi hadiah atau janji kepada Pangonal Harahap selaku Bupati Labuhanbatu Sumatera Utara periode 2016 s.d. 2021 dan Umar Ritonga terkait proyek-proyek di Lingkungan Pemerintah Kabupaten Labuhanbatu Sumatera Utara Tahun Anggaran 2018 atas nama tersangka EFENDY SAHPUTRA Alias ASIONG (Swasta). Sprin.Dik/101/DIK.00/01/07/2018 Tanggal 18/07/2018.
  9. Perkara TPK menerima hadiah atau janji dari Efendy Sahputra alias Asiong, bersama-sama Umar Ritonga, terkait proyek-proyek di Lingkungan Pemerintah Kabupaten Labuhanbatu Sumatera Utara Tahun Anggaran 2018 atas nama Tersangka PANGONAL HARAHAHAP (Bupati Labuhanbatu Sumatera Utara periode 2016 s.d. 2021). Sprin.Dik/102/DIK.00/01/07/2018 Tanggal 18/07/2018.
  10. Perkara TPK menerima hadiah atau janji dari Efendy Sahputra alias Asiong, bersama-sama dengan Pangonal Harahap selaku Bupati Labuhanbatu Sumatera Utara periode 2016 s.d. 2021, terkait proyek-proyek di Lingkungan Pemerintah Kabupaten Labuhanbatu Sumatera Utara Tahun Anggaran 2018 atas nama Tersangka UMAR RITONGA (Swasta). Sprin.Dik/103/DIK.00/01/07/2018 Tanggal 18/07/2018.
  11. Perkara TPK secara bersama-sama memberi atau menjanjikan sesuatu kepada penyelenggara negara dengan maksud supaya penyelenggara negara tersebut berbuat atau tidak berbuat sesuatu dalam jabatannya, yang bertentangan dengan kewajibannya terkait dengan Pemberian Fasilitas,

Pemberian Perizinan ataupun Pemberian lainnya di LP Klas I Sukamiskin, atas nama tersangka FAHMI DARMAWANSYAH (Warga Binaan Lapas Klas I Sukamiskin).

Sprin.Dik/104/DIK.00/01/07/2018 Tanggal 21/07/2018.

12. Perkara TPK secara bersama-sama memberi atau menjanjikan sesuatu kepada penyelenggara negara dengan maksud supaya penyelenggara negara tersebut berbuat atau tidak berbuat sesuatu dalam jabatannya, yang bertentangan dengan kewajibannya terkait dengan Pemberian Fasilitas, Pemberian Perizinan ataupun Pemberian lainnya di LP Klas I Sukamiskin, atas nama Tersangka ANDRI RAHMAT (Warga Binaan Lapas Klas I Sukamiskin). Sprin.Dik/105/DIK.00/01/07/2018 Tanggal 21/07/2018.
13. Perkara TPK penyelenggara negara yang bersama-sama menerima hadiah atau janji padahal diketahui atau patut diduga bahwa hadiah atau janji tersebut diberikan untuk menggerakkan agar melakukan atau tidak melakukan sesuatu dalam jabatannya yang bertentangan dengan kewajibannya terkait dengan Pemberian Fasilitas, Pemberian Perizinan ataupun Pemberian lainnya di LP Klas I Sukamiskin, atas nama Tersangka WAHID HUSEN (Kalapas Klas I Sukamiskin). Sprin.Dik/106/DIK.00/01/07/2018 Tanggal 21/07/2018.
14. Perkara TPK penyelenggara negara yang bersama-sama menerima hadiah atau janji padahal diketahui atau patut diduga bahwa hadiah atau janji tersebut diberikan untuk menggerakkan agar melakukan atau tidak melakukan sesuatu dalam jabatannya yang bertentangan dengan kewajibannya terkait dengan Pemberian Fasilitas, Pemberian Perizinan ataupun Pemberian lainnya di LP Klas I Sukamiskin, atas nama tersangka HENDRY SAPUTRA (PNS pada Lapas Klas I Sukamiskin). Sprin.Dik/107/DIK.00/01/07/2018 Tanggal 21/07/2018.
15. Perkara TPK memberi hadiah atau janji terkait pengadaan barang dan jasa di lingkungan Pemerintah Kabupaten Lampung Selatan Tahun Anggaran 2018 atas nama Tersangka GILANG RAMADHAN (Swasta). Sprin.Dik/108/DIK.00/01/07/2018 Tanggal 27/07/2018.
16. Perkara TPK menerima hadiah atau janji terkait pengadaan barang dan jasa di lingkungan Pemerintah Kabupaten Lampung Selatan atas nama tersangka ZAINUDIN HASAN (Bupati Lampung Selatan periode tahun 2016 sampai dengan tahun 2021). Sprin.Dik/109/DIK.00/01/07/2018 Tanggal 27/07/2018.
17. Perkara TPK menerima hadiah atau janji terkait pengadaan barang dan jasa di lingkungan Pemerintah Kabupaten Lampung Selatan bersama-sama dengan Zainudin Hasan selaku Bupati Lampung Selatan periode tahun 2016 sampai dengan tahun 2021 atas nama Tersangka ANJAR ASMARA (Kepala Dinas Pekerjaan Umum dan Penataan Ruang Kabupaten Lampung Selatan). Sprin.Dik/110/DIK.00/01/07/2018 Tanggal 27/07/2018.
18. Perkara TPK menerima hadiah atau janji terkait pengadaan barang dan jasa di lingkungan Pemerintah Kabupaten Lampung Selatan bersama-sama dengan Zainudin Hasan selaku Bupati Lampung Selatan periode tahun 2016 sampai dengan tahun 2021, atas nama tersangka AGUS BHAKTI NUGROHO (Anggota DPRD Lampung). Sprin.Dik/111/DIK.00/01/07/2018 Tanggal 27/07/2018.

## Agustus

1. Perkara TPK bersama-sama dengan Eni Maulani Saragih selaku Anggota DPR RI periode 2014 s.d. 2019 dan kawan-kawan yaitu menerima hadiah atau janji dari Johanes Budisutrisno Kotjo terkait kesepakatan kontrak kerjasama Pembangunan PLTU Riau-1 atas nama tersangka IDRUS MARHAM (Menteri Sosial). Sprin.Dik/112/DIK.00/01/08/2018 Tanggal 21/08/2018.
2. Perkara TPK menerima hadiah atau janji terkait Pembahasan APBD-P Pemkot Malang TA 2015 dari Moch. Anton selaku Walikota Malang periode tahun 2013 s.d. 2018 dan kawan-kawan dan melakukan dugaan tindak pidana korupsi yaitu menerima gratifikasi yang berhubungan dengan jabatannya dan yang berlawanan dengan kewajiban atau tugasnya selaku anggota DPRD Kota Malang periode 2014-2019 atas nama tersangka ARIEF HERMANTO, TEGUH MULYONO, MULYANTO,

- CHOEROEL ANWAR, SUPARNO HADIWIBOWO (masing-masing sebagai anggota DPRD Kota Malang Periode 2014-2019). Sprin.Dik/113/DIK.00/01/08/2018 Tanggal 24/08/2018.
3. Perkara TPK menerima hadiah atau janji terkait Pembahasan APBD-P Pemkot Malang TA 2015 dari Moch. Anton selaku Walikota Malang periode tahun 2013 s.d. 2018 dan kawan-kawan dan melakukan dugaan tindak pidana korupsi yaitu menerima gratifikasi yang berhubungan dengan jabatannya dan yang berlawanan dengan kewajiban atau tugasnya selaku anggota DPRD Kota Malang periode 2014-2019 atas nama tersangka IMAM GHOZALI, MOHAMMAD FADLI, ASIA IRIANI, INDRA TJAHYONO, EEN AMBARSARI, BAMBANG TRIYOSO (masing-masing sebagai anggota DPRD Kota Malang Periode 2014-2019). Sprin.Dik/114/DIK.00/01/08/2018 Tanggal 24/08/2018.
  4. Perkara TPK menerima hadiah atau janji terkait Pembahasan APBD-P Pemkot Malang TA 2015 dari Moch. Anton selaku Walikota Malang periode tahun 2013 s.d. 2018 dan kawan-kawan dan melakukan dugaan tindak pidana korupsi yaitu menerima gratifikasi yang berhubungan dengan jabatannya dan yang berlawanan dengan kewajiban atau tugasnya selaku anggota DPRD Kota Malang periode 2014-2019 atas nama tersangka DIANA YANTI, SUGIARTO, AFDHAL FAUZA, SYAMSUL FAJRIH, HADI SUSANTO (masing-masing selaku anggota DPRD Kota Malang Periode 2014-2019). Sprin.Dik/115/DIK.00/01/08/2018 Tanggal 24/08/2018.
  5. Perkara TPK menerima hadiah atau janji terkait Pembahasan APBD-P Pemkot Malang TA 2015 dari Moch. Anton selaku Walikota Malang periode tahun 2013 s.d. 2018 dan kawan-kawan dan melakukan dugaan tindak pidana korupsi yaitu menerima gratifikasi yang berhubungan dengan jabatannya dan yang berlawanan dengan kewajiban atau tugasnya selaku anggota DPRD Kota Malang periode 2014-2019 atas nama tersangka ERNI FARIDA, SONY YUDIARTO, HARUN PRASOJO, TEGUH PUJI WAHYONO, CHOIRUL AMRI (masing-masing selaku anggota DPRD Kota Malang Periode 2014-2019). Sprin.Dik/116/DIK.00/01/08/2018 Tanggal 24/08/2018.
  6. Perkara TPK menerima hadiah atau janji terkait Pembahasan APBD-P Pemkot Malang TA 2015 dari Moch. Anton selaku Walikota Malang periode tahun 2013 s.d. 2018 dan kawan-kawan dan melakukan dugaan tindak pidana korupsi yaitu menerima gratifikasi yang berhubungan dengan jabatannya dan yang berlawanan dengan kewajiban atau tugasnya selaku anggota DPRD Kota Malang periode 2014-2019 atas nama tersangka RIBUT HARIANTO (anggota DPRD Kota Malang Periode 2014-2019). Sprin.Dik/117/DIK.00/01/08/2018 Tanggal 24/08/2018.
  7. Perkara TPK secara bersama-sama memberi atau menjanjikan sesuatu kepada Hakim dengan maksud untuk mempengaruhi putusan perkara yang diserahkan kepadanya untuk diadili atau secara bersama-sama memberi atau menjanjikan sesuatu kepada pegawai negeri atau penyelenggara negara dengan maksud supaya pegawai negeri atau penyelenggara negara tersebut berbuat atau tidak berbuat sesuatu dalam jabatannya, yang bertentangan dengan kewajibannya terkait dengan putusan perkara Tindak Pidana Korupsi Nomor : 33/Pid.Sus-TPK/2018/PN.Mdn atas nama Terdakwa Tamin Sukardi, atas nama tersangka TAMIN SUKARDI (Swasta). Sprin.Dik/118/DIK.00/01/08/2018 Tanggal 29/08/2018.
  8. Perkara TPK secara bersama-sama memberi atau menjanjikan sesuatu kepada Hakim dengan maksud untuk mempengaruhi putusan perkara yang diserahkan kepadanya untuk diadili atau secara bersama-sama memberi atau menjanjikan sesuatu kepada pegawai negeri atau penyelenggara negara dengan maksud supaya pegawai negeri atau penyelenggara negara tersebut berbuat atau tidak berbuat sesuatu dalam jabatannya, yang bertentangan dengan kewajibannya terkait dengan putusan perkara Tindak Pidana Korupsi Nomor : 33/Pid.Sus-TPK/2018/PN.Mdn atas nama Terdakwa Tamin Sukardi, atas nama tersangka HADI SETIAWAN (Swasta). Sprin.Dik/119/DIK.00/01/08/2018 Tanggal 29/08/2018.
  9. Perkara TPK secara bersama-sama dengan Hakim yang menerima hadiah atau janji padahal diketahui atau patut diduga bahwa hadiah atau janji tersebut diberikan untuk mempengaruhi putusan perkara yang diserahkan kepadanya untuk diadili atau secara bersama-sama pegawai negeri atau penyelenggara negara yang menerima hadiah atau janji padahal diketahui atau patut

diduga bahwa hadiah atau janji tersebut diberikan untuk menggerakkan agar melakukan atau tidak melakukan sesuatu dalam jabatannya, yang bertentangan dengan kewajibannya terkait dengan putusan perkara Tindak Pidana Korupsi Nomor: 33/Pid.Sus-TPK/2018/PN.Mdn atas nama Terdakwa Tamin Sukardi, atas nama tersangka HELPANDI (Panitera Pengganti di Pengadilan Tindak Pidana Korupsi Pada Pengadilan Negeri Medan). Sprin.Dik/120/DIK.00/01/08/2018 Tanggal 29/08/2018.

10. Perkara TPK secara bersama-sama menerima hadiah atau janji padahal diketahui atau patut diduga bahwa hadiah atau janji tersebut diberikan untuk mempengaruhi putusan perkara yang diserahkan kepadanya untuk diadili atau secara bersama-sama pegawai negeri atau penyelenggara negara yang menerima hadiah atau janji padahal diketahui atau patut diduga bahwa hadiah atau janji tersebut diberikan untuk menggerakkan agar melakukan atau tidak melakukan sesuatu dalam jabatannya, yang bertentangan dengan kewajibannya terkait dengan putusan perkara Tindak Pidana Korupsi Nomor: 33/Pid.Sus-TPK/2018/PN.Mdn atas nama Terdakwa Tamin Sukardi, atas nama tersangka MERRY PURBA (Anggota Majelis Hakim di Pengadilan Tindak Pidana Korupsi Pada Pengadilan Negeri Medan). Sprin.Dik/121/DIK.00/01/08/2018 Tanggal 29/08/2018.

## September

1. Perkara TPK bersama-sama H. Irwandi Yusuf, M.Sc selaku Gubernur Provinsi Aceh periode 2007-2012, yaitu menerima gratifikasi yang berhubungan dengan jabatannya dan yang berlawanan dengan kewajiban atau tugasnya atas nama tersangka IZIL AZHAR (Swasta). Sprin.Dik/122/DIK.00/01/09/2018 Tanggal 28/09/2018.
2. Perkara TPK bersama-sama Izil Azhar, yaitu menerima gratifikasi yang berhubungan dengan jabatannya dan yang berlawanan dengan kewajiban atau tugasnya atas nama tersangka IRWANDI YUSUF (Gubernur Provinsi Aceh periode 2007-2012). Sprin.Dik/123/DIK.00/01/09/2018 Tanggal 28/09/2018.
3. Perkara TPK berupa pemberian hadiah atau janji kepada Mustofa Kamal Pasa selaku Bupati Mojokerto bersama-sama dengan Onggo Wijaya selaku Direktur Operasi PT Profesional Telekomunikasi Indonesia (Protelindo) dan kawan-kawan terkait dengan Pengurusan Izin Prinsip Pemanfaatan Ruang (IPPR) dan Izin Mendirikan Bangunan (IMB) atas Pembangunan Menara Telekomunikasi di Kabupaten Mojokerto Tahun 2015 atas nama tersangka ACHMAD SUHAWI (Swasta). Sprin.Dik/124/DIK.00/01/09/2018 Tanggal 28/09/2018.
4. Perkara TPK berupa Pemberian Hadiah atau Janji kepada Mustofa Kamal Pasa selaku Bupati Mojokerto bersama-sama dengan Onggo Wijaya selaku Direktur Operasi PT Profesional Telekomunikasi Indonesia (Protelindo) dan kawan-kawan terkait dengan Pengurusan Izin Prinsip Pemanfaatan Ruang (IPPR) dan Izin Mendirikan Bangunan (IMB) atas Pembangunan Menara Telekomunikasi di Kabupaten Mojokerto Tahun 2015 atas nama tersangka SUBHAN (wakil bupati Malang). Sprin.Dik/125/DIK.00/01/09/2018 Tanggal 28/09/2018.
5. Perkara TPK berupa Pemberian Hadiah atau Janji kepada Mustofa Kamal Pasa selaku Bupati Mojokerto bersama-sama dengan Ockyanto selaku Permit and Regulatory Division Head PT Tower Bersama Infrastructure (Tower Bersama Group) dan kawan-kawan terkait dengan Pengurusan Izin Prinsip Pemanfaatan Ruang (IPPR) dan Izin Mendirikan Bangunan (IMB) atas Pembangunan Menara Telekomunikasi di Kabupaten Mojokerto Tahun 2015 atas nama tersangka NABIELTITAWANO (Swasta). Sprin.Dik/126/DIK.00/01/09/2018 Tanggal 28/09/2018.

## Oktober

1. Perkara TPK yaitu dengan sengaja mencegah, merintang, atau menggagalkan secara langsung atau tidak langsung penyidikan tindak pidana korupsi terhadap Tersangka Eddy Sindoro, atas nama tersangka LUCAS (Swasta). Sprin.Dik/127/DIK.00/01/10/2018 Tanggal 01/10/2018.



2. Perkara TPK bersama-sama Eryk Armando Talla dan kawan-kawan, yaitu menerima gratifikasi yang berhubungan dengan jabatannya dan yang berlawanan dengan kewajiban atau tugasnya atas nama tersangka RENDRA KRESNA (Bupati Malang). Sprin.Dik/128/DIK.00/01/10/2018 Tanggal 04/10/2018.
3. Perkara TPK bersama-sama Rendra Kresna selaku Bupati Malang periode tahun 2010-2015 dan periode 2016-2021 dan kawan-kawan, yaitu menerima gratifikasi yang berhubungan dengan jabatannya dan yang berlawanan dengan kewajiban atau tugasnya atas nama tersangka ERYK ARMANDO TALLA (Swasta). Sprin.Dik/129/DIK.00/01/10/2018 Tanggal 04/10/2018.
4. Perkara TPK yaitu menerima hadiah atau janji terkait Penyediaan Sarana Penunjang Peningkatan Mutu Pendidikan pada Dinas Pendidikan Pemerintah Kabupaten Malang Tahun Anggaran 2011 dari Ali Murtopo dan kawan-kawan atas nama tersangka RENDRA KRESNA (Bupati Malang). Sprin.Dik/130/DIK.00/01/10/2018 Tanggal 04/10/2018.
5. Perkara TPK yaitu memberi hadiah atau janji terkait Penyediaan Sarana Penunjang Peningkatan Mutu Pendidikan pada Dinas Pendidikan Pemerintah Kabupaten Malang Tahun Anggaran 2011 kepada Rendra Kresna selaku Bupati Malang periode tahun 2010-2015 atas nama tersangka ALI MURTOPO (Swasta). Sprin.Dik/131/DIK.00/01/10/2018 Tanggal 04/10/2018.
6. Perkara TPK terkait pengadaan dan pelaksanaan pekerjaan konstruksi Pembangunan Gedung Kampus Institut Pemerintahan Dalam Negeri (IPDN) Provinsi Sulawesi Selatan di Kabupaten Gowa pada Kementerian Dalam Negeri Republik Indonesia Tahun Anggaran 2011 atas nama tersangka DUDY JOCOM (PPK Kemendagri). Sprin.Dik/132/DIK.00/01/10/2018 Tanggal 04/10/2018.
7. Perkara TPK terkait pengadaan dan pelaksanaan pekerjaan konstruksi Pembangunan Gedung Kampus Institut Pemerintahan Dalam Negeri (IPDN) Provinsi Sulawesi Selatan di Kabupaten Gowa pada Kementerian Dalam Negeri Republik Indonesia Tahun Anggaran 2011 atas nama tersangka ADI WIBOWO (kativ waskita karya BUMN). Sprin.Dik/133/DIK.00/01/10/2018 Tanggal 04/10/2018.
8. Perkara TPK terkait pengadaan dan pelaksanaan pekerjaan konstruksi Pembangunan Gedung Kampus Institut Pemerintahan Dalam Negeri (IPDN) Provinsi Sulawesi Utara di Kabupaten Minahasa pada Kementerian Dalam Negeri Republik Indonesia Tahun Anggaran 2011 atas nama tersangka DUDY JOCOM (PPK Kemendagri). Sprin.Dik/134/DIK.00/01/10/2018 Tanggal 04/10/2018.
9. Perkara TPK terkait pengadaan dan pelaksanaan pekerjaan konstruksi Pembangunan Gedung Kampus Institut Pemerintahan Dalam Negeri (IPDN) Provinsi Sulawesi Utara di Kabupaten Minahasa pada Kementerian Dalam Negeri Republik Indonesia Tahun Anggaran 2011 atas nama tersangka DONO PURWOKO (kativ adhi karya BUMN). Sprin.Dik/135/DIK.00/01/10/2018 Tanggal 04/10/2018.
10. Perkara TPK setiap orang yang memberi atau menjanjikan sesuatu kepada penyelenggara negara dengan maksud supaya penyelenggara negara tersebut berbuat atau tidak berbuat sesuatu dalam jabatannya, yang bertentangan dengan kewajibannya terkait dengan Pemeriksaan Khusus Orang Pribadi a.n. Anthony Liando untuk Tahun Pajak 2016 atas nama tersangka ANTHONY LIANDO (Direktur CV Angin Timur). Sprin.Dik/136/DIK.00/01/10/2018 Tanggal 04/10/2018.
11. Perkara TPK yaitu penyelenggara negara yang bersama-sama menerima hadiah atau janji padahal diketahui atau patut diduga bahwa hadiah atau janji tersebut diberikan untuk menggerakkan agar melakukan atau tidak melakukan sesuatu dalam jabatannya yang bertentangan dengan kewajibannya terkait dengan Pemeriksaan Khusus Orang Pribadi a.n. Anthony Liando untuk Tahun Pajak 2016 atas nama tersangka LA MASIKAMBA (Kepala KPP Pratama Ambon - eselon III). Sprin.Dik/137/DIK.00/01/10/2018 Tanggal 04/10/2018.
12. Perkara TPK yaitu penyelenggara negara yang bersama-sama menerima hadiah atau janji padahal diketahui atau patut diduga bahwa hadiah atau janji tersebut diberikan untuk menggerakkan agar melakukan atau tidak melakukan sesuatu dalam jabatannya yang bertentangan dengan

kewajibannya terkait dengan Pemeriksaan Khusus Orang Pribadi a.n. Anthony Liando untuk Tahun Pajak 2016 SULIMIN RATMIN (Pemeriksa Pajak Madya KPP Pratama Ambon).

Sprin.Dik/138/DIK.00/01/10/2018 Tanggal 04/10/2018.

13. Perkara TPK berupa pemberian hadiah atau janji kepada Penyelenggara Negara dan/atau Pegawai Negeri, terkait dengan Pengadaan Barang dan Jasa di lingkungan Pemerintah Kota Pasuruan Tahun Anggaran 2018 atas nama Tersangka MUHAMAD BAQIR (Swasta).  
Sprin.Dik/139/DIK.00/01/10/2018 Tanggal 05/10/2018.
14. Perkara TPK berupa penerimaan hadiah atau janji bersama-sama dengan Setiyono selaku Walikota Pasuruan periode 2016-2021 dan kawan-kawan, terkait dengan Pengadaan Barang dan Jasa di lingkungan Pemerintah Kota Pasuruan Tahun Anggaran 2018 atas nama tersangka DWI FITRI NURCAHYO (Pelaksana Harian (Plh) Kepala Dinas PUPR Kota Pasuruan) dan WAHYU TRI HARDIANTO (staf di Kelurahan Purutreja). Sprin.Dik/140/DIK.00/01/10/2018 Tanggal 05/10/2018.
15. Perkara TPK berupa penerimaan hadiah atau janji terkait dengan Pengadaan Barang dan Jasa di lingkungan Pemerintah Kota Pasuruan Tahun Anggaran 2018 atas nama tersangka SETIYONO (Walikota Pasuruan periode 2016-2021). Sprin.Dik/141/DIK.00/01/10/2018 Tanggal 05/10/2018.
16. Perkara TPPU dalam hubungannya dengan perbuatan menempatkan, mentransfer, mengalihkan, membelanjakan, membayarkan, menghibahkan, menitipkan, membawa ke luar negeri, mengubah bentuk, menukarkan dengan mata uang atau surat berharga atau perbuatan lain atas Harta Kekayaan yang diketahuinya atau patut diduganya merupakan hasil tindak pidana dengan tujuan menyembunyikan atau menyamarkan asal usul Harta Kekayaan atas nama tersangka MUSTOFA KAMAL PASA (Bupati Mojokerto periode Tahun 2010-2015 dan Tahun 2016-2021).  
Sprin.Dik/142/DIK.00/01/10/2018 Tanggal 05/10/2018.
17. Perkara TPK menerima hadiah atau janji dari Efendy Sahputra alias Asiong, bersama-sama dengan Pangonal Harahap selaku Bupati Labuhanbatu Sumatera Utara periode 2016 s.d. 2021, terkait proyek-proyek di Lingkungan Pemerintah Kabupaten Labuhanbatu Sumatera Utara Tahun Anggaran 2018 atas nama Tersangka TAMRIN RITONGA (Swasta). Sprin.Dik/143/DIK.00/01/10/2018 Tanggal 05/10/2018.
18. Perkara TPPU dalam hubungannya dengan perbuatan menempatkan, mentransfer, mengalihkan, membelanjakan, membayarkan, menghibahkan, menitipkan, membawa ke luar negeri, mengubah bentuk, menukarkan dengan mata uang atau surat berharga atau perbuatan lain atas Harta Kekayaan yang diketahuinya atau patut diduganya merupakan hasil tindak pidana korupsi dengan tujuan menyembunyikan atau menyamarkan asal usul Harta Kekayaan atas nama tersangka ZAINUDIN HASAN (Bupati Lampung Selatan periode tahun 2016 sampai dengan 2021).  
Sprin.Dik/144/DIK.00/01/10/2018 Tanggal 12/10/2018.
19. Perkara TPK memberi atau menjanjikan sesuatu kepada Pegawai Negeri atau Penyelenggara Negara terkait dengan pengurusan perizinan proyek pembangunan Meikarta di Kabupaten Bekasi atas nama tersangka BILLY SINDORO (swasta). Sprin.Dik/145/DIK.00/01/10/2018 Tanggal 15/10/2018.
20. Perkara TPK memberi atau menjanjikan sesuatu kepada Pegawai Negeri atau Penyelenggara Negara terkait dengan pengurusan perizinan proyek pembangunan Meikarta di Kabupaten Bekasi atas nama tersangka HENRY JASMEN P. SITOANG (Swasta). Sprin.Dik/146/DIK.00/01/10/2018 Tanggal 15/10/2018.
21. Perkara TPK memberi atau menjanjikan sesuatu kepada Pegawai Negeri atau Penyelenggara Negara terkait dengan pengurusan perizinan proyek pembangunan Meikarta di Kabupaten Bekasi atas nama Tersangka TARYUDI (Swasta). Sprin.Dik/147/DIK.00/01/10/2018 Tanggal 15/10/2018.
22. Perkara TPK memberi atau menjanjikan sesuatu kepada Pegawai Negeri atau Penyelenggara Negara terkait dengan pengurusan perizinan proyek pembangunan Meikarta di Kabupaten Bekasi atas nama Tersangka FITRADJAJA PURNAMA (Swasta). Sprin.Dik/148/DIK.00/01/10/2018 Tanggal 15/10/2018.

23. Perkara TPK menerima hadiah atau janji terkait dengan pengurusan perizinan proyek pembangunan Meikarta di Kabupaten Bekasi atas nama Tersangka NENENG HASANAH YASIN (Bupati Bekasi). Sprin.Dik/149/DIK.00/01/10/2018 Tanggal 15/10/2018.
24. Perkara TPK bersama-sama dengan Sdri. Neneng Hasanah Yasin selaku Bupati Kabupaten Bekasi menerima hadiah atau janji terkait dengan pengurusan perizinan proyek pembangunan Meikarta di Kabupaten Bekasi dan penerimaan lainnya atas nama Tersangka NENENG RAHMI NURLAILI (Pegawai Negeri atau Penyelenggara Negara). Sprin.Dik/150/DIK.00/01/10/2018 Tanggal 15/10/2018.
25. Perkara TPK bersama-sama dengan Sdri. Neneng Hasanah Yasin selaku Bupati Kabupaten Bekasi menerima hadiah atau janji terkait dengan pengurusan perizinan proyek pembangunan Meikarta di Kabupaten Bekasi dan penerimaan lainnya atas nama tersangka H. JAMALUDIN (Pegawai Negeri atau Penyelenggara Negara). Sprin.Dik/151/DIK.00/01/10/2018 Tanggal 15/10/2018.
26. Perkara TPK bersama-sama dengan Sdri. Neneng Hasanah Yasin selaku Bupati
27. Kabupaten Bekasi menerima hadiah atau janji terkait dengan pengurusan perizinan proyek pembangunan Meikarta di Kabupaten Bekasi dan penerimaan lainnya atas nama tersangka SAHAT MBJ NAHOR (Pegawai Negeri atau Penyelenggara Negara). Sprin.Dik/152/DIK.00/01/10/2018 Tanggal 15/10/2018.
28. Perkara TPK bersama-sama dengan Sdri. Neneng Hasanah Yasin selaku Bupati Kabupaten Bekasi menerima hadiah atau janji terkait dengan pengurusan perizinan proyek pembangunan Meikarta di Kabupaten Bekasi dan penerimaan lainnya yang diduga dilakukan oleh Tersangka DEWI TISNAWATI (Pegawai Negeri atau Penyelenggara Negara). Sprin.Dik/153/DIK.00/01/10/2018 Tanggal 15/10/2018.
29. Perkara TPK yaitu menerima hadiah atau janji padahal diketahui atau patut diduga bahwa hadiah atau janji tersebut diberikan untuk menggerakkan agar melakukan atau tidak melakukan sesuatu dalam jabatannya atau karena telah melakukan atau tidak melakukan sesuatu dalam jabatannya, yang bertentangan dengan kewajibannya terkait dengan Pengesahan atau Pembahasan APBD Kabupaten Kebumen periode 2015-2016, Pengesahan atau pembahasan APBD Perubahan Kabupaten Kebumen periode 2015-2016, dan Pokok Pikiran DPRD Kebumen tahun 2015-2016 atas nama tersangka CIPTO WALUYO (Ketua DPRD Kabupaten Kebumen 2014-2019). Sprin.Dik/154/DIK.00/01/10/2018 Tanggal 18/10/2018.
30. Perkara TPK yaitu menerima hadiah atau janji padahal diketahui atau patut diduga bahwa hadiah atau janji tersebut diberikan untuk menggerakkan agar melakukan atau tidak melakukan sesuatu dalam jabatannya atau karena telah melakukan atau tidak melakukan sesuatu dalam jabatannya, yang bertentangan dengan kewajibannya terkait dengan perolehan anggaran Dana Alokasi Khusus (DAK) Fisik pada Perubahan APBN Tahun Anggaran 2016 untuk alokasi APBD Perubahan Kabupaten Kebumen Tahun Anggaran 2016 atas nama tersangka TAUFIK KURNIAWAN (Wakil Ketua DPR RI periode tahun 2014-2019). Sprin.Dik/155/DIK.00/01/10/2018 Tanggal 18/10/2018.
31. Perkara TPK yaitu menerima hadiah atau janji terkait mutasi, rotasi dan promosi jabatan di Pemerintah Kabupaten Cirebon dari Gatot Rachmanto selaku Sekretaris Dinas PUPR Pemkab Cirebon dan kawan-kawan atas nama tersangka SUNJAYA PURWADISASTRA (Bupati Cirebon periode 2014-2019). Sprin.Dik/156/DIK.00/01/10/2018 Tanggal 25/10/2018.
32. Perkara TPK yaitu memberi hadiah atau janji terkait mutasi, rotasi dan promosi jabatan di Pemerintah Kabupaten Cirebon kepada Sunjaya Purwadisastra selaku Bupati Cirebon periode 2014-2019 atas nama tersangka GATOT RACHMANTO (Sekretaris Dinas PUPR Pemkab Cirebon). Sprin.Dik/157/DIK.00/01/10/2018 Tanggal 25/10/2018.
33. Perkara TPK yaitu menerima hadiah atau janji terkait perizinan di Pemerintah Kabupaten Cirebon serta penerimaan lainnya atas nama tersangka SUNJAYA PURWADISASTRA (Bupati Cirebon periode 2014-2019). Sprin.Dik/158/DIK.00/01/10/2018 Tanggal 25/10/2018.

34. Perkara TPK bersama-sama dengan Teguh Dudy Syamsury Zaldy dan Willy Agung Adipradhana yaitu memberi hadiah atau janji kepada Borak Milton, Punding LH Bangkan, Edy Rosada dan Arisavanah selaku Komisi B DPRD Provinsi Kalimantan Tengah periode 2014-2019 dalam menjalankan tugas dan fungsi DPRD atas nama tersangka EDY SAPUTRA SURADJA (Wakil Direktur Utama PT SMART, Tbk. dan Direktur PT Binasawit Abadi Pratama).  
Sprin.Dik/159/DIK.00/01/10/2018 Tanggal 27/10/2018.
35. Perkara TPK bersama-sama Edy Saputra Suradja selaku Wakil Direktur Utama PT SMART, Tbk. dan Direktur PT Binasawit Abadi Pratama, yaitu memberi hadiah atau janji kepada Borak Milton, Punding LH Bangkan, Edy Rosada dan Arisavanah selaku Komisi B DPRD Provinsi Kalimantan Tengah periode 2014-2019 dalam menjalankan tugas dan fungsi DPRD atas nama tersangka TEGUH DUDY SYAMSURY ZALDY (Swasta) dan WILLY AGUNG ADIPRADHANA (Swasta).  
Sprin.Dik/160/DIK.00/01/10/2018 Tanggal 27/10/2018.
36. Perkara TPK bersama sama dengan Edy Rosada dan Arisavanah selaku Anggota Komisi B DPRD Provinsi Kalimantan Tengah periode 2014-2019 yaitu menerima hadiah atau janji padahal diketahui atau patut diduga hadiah atau janji tersebut diberikan untuk menggerakkan agar melakukan atau tidak melakukan sesuatu dalam jabatannya, yang bertentangan dengan kewajibannya dalam menjalankan tugas dan fungsi DPRD atas nama tersangka BORAK MILTON (Anggota DPRD) dan PUNDING LH BANGKAN (Anggota DPRD). Sprin.Dik/161/DIK.00/01/10/2018 Tanggal 27/10/2018.
37. Perkara TPK bersama-sama BORAK MILTON selaku Ketua Komisi B DPRD Provinsi Kalimantan Tengah dan PUNDING LH BANGKAN selaku sekretaris Komisi B DPRD Provinsi Kalimantan Tengah, yaitu menerima hadiah atau janji padahal diketahui atau patut diduga hadiah atau janji tersebut diberikan untuk menggerakkan agar melakukan atau tidak melakukan sesuatu dalam jabatannya, yang bertentangan dengan kewajibannya dalam menjalankan tugas dan fungsi DPRD atas nama tersangka EDY ROSADA (Anggota DPRD) dan ARISAVANAH (Anggota DPRD).  
Sprin.Dik/161/DIK.00/01/10/2018 Tanggal 27/10/2018.

## November

1. Perkara TPK terkait dengan pelaksanaan pekerjaan sub kontraktor fiktif pada proyek-proyek yang dikerjakan PT. WASKITA KARYA (Persero), Tbk. Atas nama tersangka FATHOR RACHMAN (kadv waskita karya BUMN). Sprin.Dik/163/DIK.00/01/11/2018 Tanggal 05/11/2018.
2. Perkara TPK bersama-sama dengan Fathor Rachman selaku Kepala Divisi II PT. WASKITA KARYA (Persero), Tbk dan kawan-kawan, terkait dengan pelaksanaan pekerjaan sub kontraktor fiktif pada proyek-proyek yang dikerjakan PT. WASKITA KARYA (Persero), Tbk atas nama tersangka YULY ARIANDI SIREGAR (Kepala Bagian Keuangan dan Risiko Divisi II PT. WASKITA KARYA (Persero), Tbk). Sprin.Dik/164/DIK.00/01/11/2018 Tanggal 05/11/2018.
3. Perkara TPK menerima hadiah atau janji terkait proyek-proyek di Dinas PUPR Kabupaten Pakpak Bharat Tahun Anggaran 2018 bersama-sama dengan David Anderson Karosekali selaku Plt Kadis PUPR Kabupaten Pakpak Bharat dan Hendriko Sembiring atas nama tersangka REMIGO YOLANDA BERUTU (Bupati Pakpak Bharat periode 2016 s.d 2021). Sprin.Dik/165/DIK.00/01/11/2018 Tanggal 18/11/2018.
4. Perkara TPK menerima hadiah atau janji terkait proyek-proyek di Dinas PUPR Kabupaten Pakpak Bharat Tahun Anggaran 2018 bersama-sama dengan Remigo Yolando Berutu selaku Bupati Pakpak Bharat periode 2016 s.d 2021 dan Hendriko Sembiring, atas nama Tersangka DAVID ANDERSON KAROSEKALI (Plt. Kadis PUPR Kabupaten Pakpak Bharat). Sprin.Dik/166/DIK.00/01/11/2018 Tanggal 18/11/2018.
5. Perkara TPK menerima hadiah atau janji terkait proyek-proyek di Dinas PUPR Kabupaten Pakpak Bharat Tahun Anggaran 2018 bersama sama dengan Remigo Yolando Berutu selaku Bupati Pakpak Bharat periode 2016 s.d 2021 dan David Anderson Karosekali selaku Plt Kadis PUPR Kabupaten

Pakpak Bharat atas nama Tersangka HENDRIKO SEMBIRING (Swasta).

Sprin.Dik/167/DIK.00/01/11/2018 Tanggal 18/11/2018.

6. Perkara TPK setiap orang yang secara bersama-sama atau membantu memberi atau menjanjikan sesuatu kepada penyelenggara negara dengan maksud supaya penyelenggara negara tersebut berbuat atau tidak berbuat sesuatu dalam jabatannya, yang bertentangan dengan kewajibannya terkait dengan Proses Pembahasan dan Pengesahan RKA-K/L dalam APBN-P TA 2016 yang akan diberikan kepada Bakamla RI, atas nama Tersangka ERWIN ARIEF (Managing Director PT. ROHDE & SCHWARZ INDONESIA). Sprin.Dik/168/DIK.00/01/11/2018 Tanggal 23/11/2018.
7. Perkara TPK suatu korporasi yang secara bersama-sama atau membantu memberi atau menjanjikan sesuatu kepada penyelenggara negara dengan maksud supaya penyelenggara negara tersebut berbuat atau tidak berbuat sesuatu dalam jabatannya, yang bertentangan dengan kewajibannya terkait dengan proses pembahasan dan pengesahan RKA-K/L dalam APBN-P TA 2016 yang akan diberikan kepada Bakamla RI, atas nama tersangka PT. MERIAL ESA (korporasi). Sprin.Dik/169/DIK.00/01/11/2018 Tanggal 23/11/2018.
8. Perkara TPK memberi hadiah atau janji kepada hakim terkait putusan atas praperadilan atas nama tersangka AHMAD MARZUQI (Bupati Jepara). Sprin.Dik/170/DIK.00/01/11/2018 Tanggal 27/11/2018.
9. Perkara TPK memberi hadiah atau janji oleh hakim terkait putusan atas praperadilan yang dilakukan oleh tersangka LASITO (Hakim pada Pengadilan negeri Semarang). Sprin.Dik/171/DIK.00/01/11/2018 Tanggal 27/11/2018.
10. Perkara TPK terkait pengadaan Pekerjaan Jasa Konsultasi di Perum Jasa Tirta II Tahun Anggaran 2017 atas nama tersangka IR. DJOKO SAPUTRO (Direktur Utama Perusahaan Umum (Perum) Jasa Tirta II dkk). Sprin.Dik/172/DIK.00/01/11/2018 Tanggal 28/11/2018.
11. Perkara TPK bersama-sama dengan IR. Djoko Saputro selaku Direktur Utama Perusahaan Umum (Perum) Jasa Tirta II dkk terkait pengadaan Pekerjaan Jasa Konsultasi di Perum Jasa Tirta II Tahun Anggaran 2017 atas nama tersangka ANDRIRINI YAKTININGSASI (Swasta). Sprin.Dik/173/DIK.00/01/11/2018 Tanggal 28/11/2018.
12. Perkara TPK memberi hadiah atau janji kepada hakim terkait penanganan perkara perdata di Pengadilan Negeri Jakarta Selatan pada tahun 2018 yang dilakukan oleh Tersangka ARIF FITRAWAN (Pengacara). Sprin.Dik/174/DIK.00/01/11/2018 Tanggal 28/11/2018.
13. Perkara TPK memberi hadiah atau janji kepada hakim terkait penanganan perkara perdata di Pengadilan Negeri Jakarta Selatan pada tahun 2018 atas nama Tersangka MARTIN P. SILITONGA (Swasta). Sprin.Dik/175/DIK.00/01/11/2018 Tanggal 28/11/2018.
14. Perkara TPK menerima hadiah atau janji oleh hakim terkait penanganan perkara perdata di Pengadilan Negeri Jakarta Selatan pada tahun 2018 yang dilakukan oleh Tersangka IRWAN (Hakim pada Pengadilan Negeri Jakarta Selatan) dan R. ISWAHYU WIDODO (Hakim pada Pengadilan Negeri Jakarta Selatan). Sprin.Dik/176/DIK.00/01/11/2018 Tanggal 28/11/2018.
15. Perkara TPK menerima hadiah atau janji oleh hakim terkait penanganan perkara perdata di Pengadilan Negeri Jakarta Selatan pada tahun 2018 bersama-sama dengan Irwan dan R. Iswahyu Widodo selaku Hakim pada Pengadilan Negeri Jakarta Selatan, atas nama Tersangka MUHAMMAD RIDWAN (Panitera). Sprin.Dik/177/DIK.00/01/11/2018 Tanggal 28/11/2018.
16. Perkara TPK memberi hadiah atau janji kepada Remigo Yolando Berutu selaku Bupati Kabupaten Pakpak Bharat Provinsi Sumatera Utara bersama-sama David Anderson Karosekali dan Hendriko Sembiring terkait dengan proyek-proyek di Dinas PUPR Kabupaten Pakpak Bharat Tahun Anggaran 2018 atas nama tersangka RIJAL EFENDI PADANG (Direktur PT Tombang Mitra Utara). Sprin.Dik/178/DIK.00/01/11/2018 Tanggal 30/11/2018.

## Desember

1. Perkara TPK berupa penyalahgunaan wewenang dalam pemberian Ijin Usaha Pertambangan (IUP) kepada PT Fajar Mentaya Abadi (FMA), PT Aries Iron Mining (AIM) dan PT Billy Indonesia (BI) di Kabupaten Kotawaringin Timur, Kalimantan Tengah tahun 2010-2012 yang dilakukan oleh Tersangka SUPIAN HADI (Bupati Kotawaringin Timur periode 2010-2015 dan 2016-2021). Sprin.Dik/179/DIK.00/01/12/2018 Tanggal 12/12/2018.
2. Perkara TPK secara bersama-sama dengan Arfan, Saipudin, Erwan Malik, dan Zumi Zola Zulkifli memberi atau menjanjikan sesuatu kepada pegawai negeri atau penyelenggara negara dengan maksud supaya pegawai negeri atau penyelenggara negara tersebut berbuat atau tidak berbuat sesuatu dalam jabatannya, yang bertentangan dengan kewajibannya dalam mendapatkan pengesahan RAPBD Provinsi Jambi Tahun Anggaran 2018 yang diduga dilakukan oleh Tersangka JEO FANDY YOESMAN Alias ASIANG (Swasta). Sprin.Dik/180/DIK.00/01/12/2018 Tanggal 12/12/2018.
3. Perkara TPK sehubungan dengan pegawai negeri atau penyelenggara negara yang menerima hadiah atau janji terkait dengan pengesahan RAPBD Provinsi Jambi Tahun Anggaran 2017 atas nama tersangka MUHAMMADIYAH (Anggota DPRD Provinsi Jambi periode 2014-2019), EFFENDI HATTA (Anggota DPRD Provinsi Jambi periode 2014-2019) & ZAINAL ABIDIN (Ketua Fraksi Demokrat DPRD Provinsi Jambi periode 2014-2019). Sprin.Dik/181/DIK.00/01/12/2018 Tanggal 12/12/2018.
4. Perkara TPK sehubungan dengan pegawai negeri atau penyelenggara negara yang menerima hadiah atau janji terkait dengan pengesahan RAPBD Provinsi Jambi Tahun Anggaran 2017 dan 2018 atas nama tersangka CORNELIS BUSTON (Ketua DPRD Provinsi Jambi periode 2014-2019), AR. SYAHBANDAR (Anggota DPRD Provinsi Jambi periode 2014-2019), dan CHUMAIDI ZAIDI (Wakil Ketua DPRD Provinsi Jambi periode 2014-2019). Sprin.Dik/182/DIK.00/01/12/2018 Tanggal 12/12/2018.
5. Perkara TPK sehubungan dengan pegawai negeri atau penyelenggara negara yang menerima hadiah atau janji terkait dengan pengesahan RAPBD Provinsi Jambi Tahun Anggaran 2017 dan 2018 atas nama tersangka SUFARDI NURZAIN (Ketua Fraksi Golkar DPRD Provinsi Jambi periode 2014-2019), ELHELWI (Anggota DPRD Provinsi Jambi periode 2014-2019), dan GUSRIZAL (Anggota DPRD Provinsi Jambi periode 2014-2019). Sprin.Dik/183/DIK.00/01/12/2018 Tanggal 12/12/2018.
6. Perkara TPK sehubungan dengan pegawai negeri atau penyelenggara negara yang menerima hadiah atau janji terkait dengan pengesahan RAPBD Provinsi Jambi Tahun Anggaran 2017 dan 2018 atas nama tersangka CEKMAN (Ketua Fraksi Restorasi Nurani DPRD Provinsi Jambi periode 2014-2019), PARLAGUTAN NASUTION (Ketua Fraksi PPP DPRD Provinsi Jambi periode 2014-2019), TADJUDIN HASAN (Ketua Fraksi PKB DPRD Provinsi Jambi periode 2014-2019). Sprin.Dik/184/DIK.00/01/12/2018 Tanggal 12/12/2018.
7. Perkara TPK sehubungan dengan pegawai negeri atau penyelenggara negara yang meminta, memotong, atau menerima pembayaran terkait dengan pencairan Dana Alokasi Khusus (DAK) APBD TA 2018 di Dinas Pendidikan dan Kebudayaan Kab. Cianjur atas nama tersangka IRVAN RIVANO MUCHTAR (Bupati Kab. Cianjur periode 2016-2021). Sprin.Dik/185/DIK.00/01/12/2018 Tanggal 12/12/2018.
8. Perkara TPK sehubungan dengan secara bersama-sama dengan Irvan Rivano Muchtar meminta, memotong, atau menerima pembayaran terkait dengan pencairan Dana Alokasi Khusus (DAK) APBD TA 2018 di Dinas Pendidikan dan Kebudayaan Kab. Cianjur atas nama tersangka CECEP SOBANDI (Kepala Dinas Pendidikan dan Kebudayaan Kab. Cianjur). Sprin.Dik/186/DIK.00/01/12/2018 Tanggal 12/12/2018.
9. Perkara TPK sehubungan dengan secara bersama-sama dengan Irvan Rivano Muchtar meminta, memotong, atau menerima pembayaran terkait dengan pencairan Dana Alokasi Khusus (DAK) APBD TA 2018 di Dinas Pendidikan dan Kebudayaan Kab. Cianjur atas nama tersangka ROSIDIN (Kepala

Bidang Pendidikan SMP Dinas Pendidikan dan Kebudayaan Kab. Cianjur).

Sprin.Dik/187/DIK.00/01/12/2018 Tanggal 12/12/2018.

10. Perkara TPK sehubungan dengan secara bersama-sama dengan Irvan Rivano Muchtar meminta, memotong, atau menerima pembayaran terkait dengan pencairan Dana Alokasi Khusus (DAK) APBD TA 2018 di Dinas Pendidikan dan Kebudayaan Kab. Cianjur atas nama tersangka TUBAGUS CEPY SEPTHIADY (Swasta). Sprin.Dik/188/DIK.00/01/12/2018 Tanggal 12/12/2018.
11. Perkara TPK sehubungan dengan setiap orang yang secara bersama-sama memberi atau menjanjikan sesuatu kepada penyelenggara negara dengan maksud supaya penyelenggara negara tersebut berbuat atau tidak berbuat sesuatu dalam jabatannya, yang bertentangan dengan kewajibannya terkait dengan Penyaluran Pembiayaan dengan Skema Bantuan Pemerintah Melalui Kementerian Pemuda dan Olahraga (Kemenpora) Republik Indonesia kepada Komite Olahraga Nasional Indonesia (KONI) Tahun Anggaran 2018 atas nama tersangka ENDING FUAD HAMIDY (Sekretaris Jenderal Pada Komite Olahraga Nasional Indonesia). Sprin.Dik/189/DIK.00/01/12/2018 Tanggal 19/12/2018.
12. Perkara TPK sehubungan dengan setiap orang yang secara bersama-sama memberi atau menjanjikan sesuatu kepada penyelenggara negara dengan maksud supaya penyelenggara negara tersebut berbuat atau tidak berbuat sesuatu dalam jabatannya, yang bertentangan dengan kewajibannya terkait dengan Penyaluran Pembiayaan dengan Skema Bantuan Pemerintah Melalui Kementerian Pemuda dan Olahraga (Kemenpora) Republik Indonesia kepada Komite Olahraga Nasional Indonesia (KONI) Tahun Anggaran 2018 atas nama tersangka JOHNY E AWUY (Bendahara Pada Komite Olahraga Nasional Indonesia). Sprin.Dik/190/DIK.00/01/12/2018 Tanggal 19/12/2018.
13. Perkara TPK sehubungan dengan setiap orang yang secara bersama-sama menerima hadiah atau janji padahal diketahui atau patut diduga bahwa hadiah atau janji tersebut diberikan untuk menggerakkan agar melakukan atau tidak melakukan sesuatu dalam jabatannya yang bertentangan dengan kewajibannya terkait dengan Penyaluran Pembiayaan dengan Skema Bantuan Pemerintah Melalui Kementerian Pemuda dan Olahraga (Kemenpora) Republik Indonesia kepada Komite Olahraga Nasional Indonesia (KONI) Tahun Anggaran 2018 atas nama tersangka MULYANA (Deputi IV Pada Kementerian Pemuda dan Olahraga). Sprin.Dik/191/DIK.00/01/12/2018 Tanggal 19/12/2018.
14. Perkara TPK sehubungan dengan setiap orang yang secara bersama-sama menerima hadiah atau janji padahal diketahui atau patut diduga bahwa hadiah atau janji tersebut diberikan untuk menggerakkan agar melakukan atau tidak melakukan sesuatu dalam jabatannya yang bertentangan dengan kewajibannya terkait dengan Penyaluran Pembiayaan dengan Skema Bantuan Pemerintah Melalui Kementerian Pemuda dan Olahraga (Kemenpora) Republik Indonesia kepada Komite Olahraga Nasional Indonesia (KONI) Tahun Anggaran 2018 atas nama tersangka ADHI PURNOMO (Pejabat Pembuat Komitmen Pada Kementerian Pemuda dan Olahraga RI). Sprin.Dik/192/DIK.00/01/12/2018 Tanggal 19/12/2018.
15. Perkara TPK sehubungan dengan setiap orang yang secara bersama-sama menerima hadiah atau janji padahal diketahui atau patut diduga bahwa hadiah atau janji tersebut diberikan untuk menggerakkan agar melakukan atau tidak melakukan sesuatu dalam jabatannya yang bertentangan dengan kewajibannya terkait dengan Penyaluran Pembiayaan dengan Skema Bantuan Pemerintah Melalui Kementerian Pemuda dan Olahraga (Kemenpora) Republik Indonesia kepada Komite Olahraga Nasional Indonesia (KONI) Tahun Anggaran 2018 atas nama tersangka EKO TRIYANTA (PNS Pada Kementerian Pemuda dan Olahraga RI). Sprin.Dik/193/DIK.00/01/12/2018 Tanggal 19/12/2018.
16. Perkara TPK sehubungan dengan memberi atau menjanjikan sesuatu kepada Pegawai Negeri atau Penyelenggara Negara terkait proyek-proyek pada Direktorat Jenderal Cipta Karya Kementerian

- Pekerjaan Umum dan Perumahan Rakyat T.A. 2017 - T.A. 2018 atas nama tersangka BUDI SUHARTO (Swasta). Sprin.Dik/194/DIK.00/01/12/2018 Tanggal 29/12/2018.
17. Perkara TPK sehubungan dengan memberi atau menjanjikan sesuatu kepada Pegawai Negeri atau Penyelenggara Negara terkait proyek-proyek pada Direktorat Jenderal Cipta Karya Kementerian Pekerjaan Umum dan Perumahan Rakyat T.A. 2017 - T.A. 2018 atas nama tersangka LILY SUNDARSIH W (Swasta), IRENE IRMA (Swasta) dan YULIANA ENGANITA DIBYO (Swasta). Sprin.Dik/195/DIK.00/01/12/2018 Tanggal 29/12/2018.
  18. Perkara TPK sehubungan dengan penerimaan hadiah atau janji pada Pekerjaan Pembangunan SPAM Kota Bandar Lampung T.A. 2018 atas nama tersangka ANGGIAT P. NAHOT SIMAREMARE (Pejabat Pembuat Komitmen Pembinaan Teknis Satker Pengembangan SPAM Strategis Direktorat Pengembangan SPAM Ditjen Cipta Karya Kementerian Pekerjaan Umum dan Perumahan Rakyat). Sprin.Dik/196/DIK.00/01/12/2018 Tanggal 29/12/2018.
  19. Perkara TPK sehubungan dengan pemberian hadiah atau janji pada Pekerjaan Konstruksi Pembangunan SPAM PDAM Binaan Kota Bogor T.A. 2017 - T.A. 2018 atas nama tersangka MEINA WORO KUSTINAH (Pejabat Pembuat Komitmen Pembangunan SPAM Strategis Wilayah IB Satker Pengembangan SPAM Strategis Direktorat Pengembangan SPAM Ditjen Cipta Karya Kementerian Pekerjaan Umum dan Perumahan Rakyat). Sprin.Dik/197/DIK.00/01/12/2018 Tanggal 29/12/2018.
  20. Perkara TPK sehubungan dengan penerimaan hadiah atau janji pada Pekerjaan Penanganan Tanggap Darurat SPAM Sulawesi Tengah T.A. 2018 atas nama tersangka T.M. NAZAR (Pejabat Pembuat Komitmen Pembinaan Teknis Darurat Permukiman Satker Tanggap Darurat Permukiman Pusat Ditjen Cipta Karya Kementerian Pekerjaan Umum dan Perumahan Rakyat). Sprin.Dik/198/DIK.00/01/12/2018 Tanggal 29/12/2018.
  21. Perkara TPK sehubungan dengan penerimaan hadiah atau janji Pekerjaan Pembangunan SPAM Paket 1 Kawasan KSPN Danau Toba Provinsi Sumatera Utara T.A. 2017 - T.A. 2018 atas nama tersangka DONNY SOFYAN ARIFIN (Pejabat Pembuat Komitmen Pembangunan SPAM Strategis Wilayah IA Satker Pengembangan SPAM Strategis Direktorat Pengembangan SPAM Ditjen Cipta Karya Kementerian Pekerjaan Umum dan Perumahan Rakyat). Sprin.Dik/199/DIK.00/01/12/2018 Tanggal 29/12/2018.

**f Share**

Tweet

You are here: / Publikasi / Penanganan Perkara (/id/publikasi/penanganan-perkara)  
/ Penyidikan (/id/publikasi/penanganan-perkara/penyidikan) / Penyidikan 2018

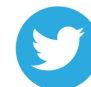

@KPK\_RI ([https://twitter.com/kpk\\_ri](https://twitter.com/kpk_ri)) : Berdasarkan Laporan Harta Kekayaan (LHK) cakada yang disa  
t.co/lgb9QocDqO (<https://t.co/lgb9QocDc>)



## Tentang KPK

---

Visi dan Misi (/id/tentang-kpk/sekilas-kpk)

Fungsi dan Tugas (/id/tentang-kpk/fungsi-dan-tugas)

Struktur Organisasi (/id/layanan-informasi-publik/laporan-harta-kekayaan-penyelenggaraan-negara/informasi-berkala/informasi-berkaitan-badan-publik/struktur-organisasi)

Pejabat Struktur KPK (/id/tentang-kpk/pejabat-struktural)

Rencana Strategis (/id/tentang-kpk/roadmap-dan-rencana-strategis)

Profil Pimpinan (/id/layanan-informasi-publik/laporan-harta-kekayaan-penyelenggaraan-negara/informasi-berkala/informasi-berkaitan-badan-publik/profil-pimpinan-kpk)

Undang - Undang Pendukung (/id/layanan-informasi-publik/laporan-harta-kekayaan-penyelenggaraan-negara/informasi-berkala/undang-undang-pemberantasan-tindak-pidana-korupsi)

## Kontak KPK

---

## GEDUNG KPK

## Indeks Berita

---

Siaran Pers (/id/berita/siaran-pers)

Berita KPK (/id/berita/berita-kpk)

Publik Bicara (/id/berita/publik-bicara)

## Layanan Publik

---

Pengaduan Masyarakat (/id/layanan-publik/pengaduan-masyarakat/mengenal-pengaduan-masyarakat)

LHKPN (/id/layanan-publik/laporan-harta-kekayaan-penyelenggaraan-negara/mengenal-lhkpn)

Gratifikasi (/id/layanan-publik/gratifikasi/mengenal-gratifikasi)

Informasi Publik (/id/layanan-publik/informasi-publik)

## Publikasi

---

Laporan Keuangan (/id/publikasi/laporan-keuangan)

Laporan Tahunan (/id/publikasi/laporan-tahunan)

Laporan PIP (/id/publikasi/laporan-pelayanan-informasi-publik)

Jln. Kuningan Persada Kav. 4

Jakarta Selatan 12950

Telp : (021) 2557 8300

Faks : (021) 2557 8333

**Call Center: 198**

Email : informasi@kpk.go.id

---

Hak Cipta © 2019 Komisi Pemberantasan Korupsi. Semua Hak Dilindungi.

## **BERSAMA KPK BERANTAS KORUPSI**

 (<https://www.facebook.com/KomisiPemberantasanKorupsi>) 

(<https://www.instagram.com/official.kpk>)  (<https://www.youtube.com/user/HUMASKPK>)
