# Supplementary material for: Democratization, leader education and growth: firm-level evidence from Indonesia
Source: Springer Nature journal article supplement (doi:10.1007/s10887-022-09221-5), 2023-02-15
Supplement: MOESM2 [file rating2002.pdf › Data/KPPOD/rating2002.pdf]

**DAYA TARIK  
INVESTASI  
KABUPATEN/KOTA  
DI INDONESIA**  
*Persepsi Dunia Usaha*

*Regional  
Investment  
Attractiveness  
Business Perception*

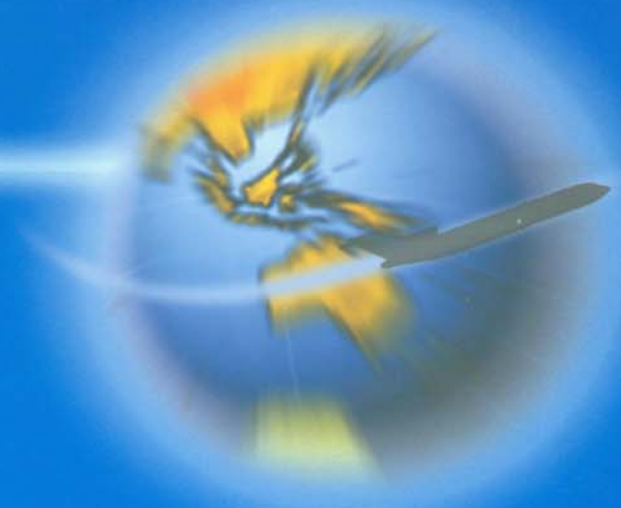

**Peringkat 134 Kabupaten/Kota di Indonesia &  
Gambaran Permasalahan Dunia Usaha**

*Rating to 134 Regencies/Cities in Indonesia &  
Problems on Business Environment*

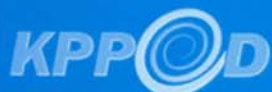

*Komite Pemantauan Pelaksanaan Otonomi Daerah / Regional Autonomy Watch*

# TIM PENELITI KPPOD

## *KPPOD Research Team*

---

### **Koordinator / *Principal Investigator:***

P. Agung Pambudhi, MM

### **Penasehat Ahli / *Resource Persons:***

Dr. Bambang P.S. Brodjonegoro

Dr. Hadi Soesastro

Dr. Djisman Simanjuntak

### **Anggota Peneliti / *Research Associates:***

Sri Mulyono, MA

Ig. Sigit Murwito, S.Sos

Robert EndiJaweng SIP

### **Peneliti Lapangan / *Area Researchers:***

Frits O. Fanggidae, M.Sc.; A. Kadir Kastella, M.Sc; Hasbullah Hasan, SE

Zulfahmi, SIP, M.Si.; Idham Cholid, SE; Imam Bachtiar S.Sos

Dr. Paulus Kindangen; R. Alam Surya Putra; La Ode Asadi, SE

Ir. M. Herman Sulistio, ME; Ir. Aris Yunanto; A. Ika Rahutami, M.Sc.

Ir. Tauhid Achmad; Ir. M. Ridwan, ME; Ir. Prasetyo Sudrajat

A. Edi Widianoro, SH; Agus Widodo, S.Sos; Gumpita, SP

Erric Wijaya, SE; Murbanto Sinaga, MA

### **Asisten Peneliti / *Research Assistants:***

Regina Retno Budiastuti, SH

F. Sundoko

Kurniawaty Septiany Musdar

# KATA PENGANTAR

## *Acknowledgement*

Selain perwujudan demokratisasi, dan pelembagaan hubungan pemerintahan pusat – daerah dan antar daerah, kesejahteraan rakyat menjadi salah satu dari tiga tujuan utama otonomi daerah; hal ini berarti bahwa dari segi ekonomi, keberhasilan otonomi daerah diukur dari sejauhmana warga daerah mendapat akses ekonomi yang lebih dari masa sebelumnya. Berbagai tolok ukur bisa digunakan dalam hal akses ekonomi itu, namun ukuran yang sangat jelas adalah ketersediaan tenaga kerja secara langsung serta *multiplier effect* yang muncul dari adanya investasi.

Dasar itulah yang mendorong KPPOD (Komite Pemantauan Pelaksanaan Otonomi Daerah) melakukan studi mengenai daya tarik investasi Kabupaten/Kota, yang dimaksudkan selain untuk menyediakan salah satu sumber informasi bagi dunia usaha, juga agar menjadi instrumen yang dapat mendorong daerah daerah otonom untuk meningkatkan kinerjanya dalam memfasilitasi aktivitas perekonomian dalam suatu kompetisi yang sehat. Para pemimpin daerah diharapkan mampu menciptakan iklim usaha yang kondusif bagi kepentingan pembangunan ekonomi yang berkelanjutan, melalui kebijakan publik dan praktek pelaksanaan kebijakan yang baik.

Melanjutkan kegiatan serupa yang dilakukannya tahun 2001, KPPOD kembali melakukan studi pemeringkatan daya tarik investasi Kabupaten/Kota dalam persepsi dunia usaha, yang kali ini mencakup 134 daerah dari 97 Kabupaten dan 37 Kota dari 26 Propinsi di Indonesia. Pemeringkatan ini menggunakan 42 (empat puluh dua) indikator yang dikelompokkan dalam 5 (lima) faktor pemeringkatan, yaitu faktor: Kelembagaan, Sosial Politik, Ekonomi Daerah, Tenaga Kerja dan Produktivitas, dan Infrastruktur Fisik. Secara metodologis, data data yang digunakan untuk menganalisis indikator indikator pemeringkatan berasal dari gabungan data sekunder dan data primer yang diolah secara kualitatif maupun kuantitatif. Sementara itu pembobotan indikator indikator dan proses pengolahan data penelitian dilakukan dengan menggunakan metode AHP (*The Analytic Hierarchy Process*). Untuk survei data primer, pilihan responden

*Committed to bring regional autonomy policy to a more meaningful existence, KPPOD (Regional Autonomy Watch) again comes up with result of another rating. This time, statistical aspects and dynamic aspects were combined to better rate autonomous regions and capture their real dynamics.*

*Our focuses remain two: policy variables and endowment variables. Policy variables are grouped into two factors, namely institutional factor and socio-political factor; endowment variables into three: regional economy, labor and productivity, and physical infrastructure. For the whole, 42 indicators were employed here, each with its value different from others from the perception of business community. The research includes 134 regions, consisting of 97 regencies and 37 cities spread in 26 provinces in Indonesia.*

*Data used in the analysis of indicators were primary and secondary, qualitative and quantitative. Valuation of variables and processing of data were done using AHP (The Analytic Hierarchy Process) method.*

*Primary data were sourced from the respondents who are business players in the region, be national businessmen, regional businessmen, or multinational businessmen. Questionnaire was the main instrument in data gathering, but interviews were also extensively conducted to obtain in-dept view on problems from the point of view of business community, regional government officials, and members of people's representatives assemblies. Through these valuable interviews, we identify also specific problems in certain sectors that hopefully are indicative enough to imply what actions should be taken for them to be settled.*

*The result of this extensive research can be seen in the body of the text. It is expected that the finding presented inside can encourage regions to improve their performance. And the fact that policy variables, and not the endowment variables, are the main concern of the businessmen is supposed to be a good news for the poor region. By maintaining a favorable*

Pengusaha yang mempunyai usaha di daerah (Pengusaha Nasional, Pengusaha Daerah, maupun Pengusaha Multinasional) dimaksudkan untuk sepenuhnya menggambarkan penilaian serta harapan dunia usaha pada upaya pemerintah daerah untuk meningkatkan daya tarik investasinya.

Selain penyajian peringkat daya tarik investasi antar daerah yang dikemas dengan berbagai kategori pemeringkatan, studi ini juga mencoba memetakan beberapa hal khusus yang dihadapi masing masing sektor usaha. Untuk menghasilkan gambaran daya tarik investasi tiap sektor usaha ini, selain dilakukan pengumpulan data primer dari kuesioner, juga dilakukan interview mendalam secara langsung dengan berbagai unsur nara sumber dari pengusaha, eksekutif daerah, dan legislatif daerah.

Penyusunan laporan penelitian ini merupakan kerjasama tim penelitian KPPOD yang dilakukan dari bulan Mei – Desember 2002 yang melibatkan tim penelitian tetap KPPOD dengan didukung para peneliti masing masing daerah penelitian lapangan dari berbagai institusi perguruan tinggi maupun institusi penelitian. Untuk itu kami mengucapkan banyak terimakasih kepada para Area Researcher dan Anggota Tim-nya masing masing, yang telah memberikan kontribusi terbaiknya bagi terselesaikannya studi ini. Terimakasih juga kami sampaikan kepada Dirjen Otonomi Daerah Departemen Dalam Negeri dan segenap unsur Pemerintahan Daerah di daerah penelitian yang mendukung kegiatan ini sehingga memungkinkan kami mendapatkan data data penelitian.

Akhirnya, kami ucapkan banyak terimakasih pada lembaga lembaga pembentuk KPPOD (Kadin Indonesia, CSIS, LPEM-FEUI, Sekolah Tinggi Manajemen Prasetia Mulya, Bisnis Indonesia, The Jakarta Post dan Suara Pembaruan) yang sangat membantu KPPOD secara finansil dan pemikiran pemikirannya; serta The Asia Foundation atas dukungan finansialnya dalam penelitian ini.

*climate and good policy orientation, they may attract investment for the progress of their regions.*

*We are doing all these with the assumption that social welfare is the main goal of regional autonomy, aside from democratization and institutionalization of fair relations between various levels of governments. If it is so, investment is an indispensable factor and measures to create favorable conditions for it are necessary. At the end, we all expect that regional autonomy, properly settled to suit investment requirement, can bring about better access to economic opportunity and resources to people in the region.*

*We thank all the parties involved in the process and supporting the conduct of the research. Field researchers in the regions that come from various higher educational institutions and research institutions are our partners in this research, adding to our existing team members in KPPOD. Several other team members supported these area researchers. We thank all of them.*

*The Director General of Regional Autonomy within the Ministry of Home Affairs also provides support for the conduct of this research. The same is also true for so many parties in regional governments. We thank all of them.*

*Finally, we extend our thanks to the institutions establishing KPPOD : (Indonesia's Chamber of Commerce and Industry (Kadin Indonesia), Center for Strategic and International Studies (CSIS), Intitute for Economic and Social Research - Faculty of Economic, University of Indonesia (LPEM-FEUI), Prasetiya Mulya Business School, Bisnis Indonesia daily newspaper, The Jakarta Post, and Suara Pembaruan afternoon-daily newspaper) for their continuous support. And for The Asia Foundation for its financial support to this research, we thank you very much.*

Atas Nama Tim Penelitian / *On Behalf of Research Team*

Koordinator Tim Peneliti / *Principial Investigator*

**P. Agung Pambudhi**



# DAFTAR ISI

## *Table of Contents*

---

|            |                                                                                                                                                         |
|------------|---------------------------------------------------------------------------------------------------------------------------------------------------------|
| <b>i</b>   | <b>JUDUL PENELITIAN / <i>Title</i></b>                                                                                                                  |
| <b>iii</b> | <b>TIM PENELITI / <i>Research Team</i></b>                                                                                                              |
| <b>v</b>   | <b>KATA PENGANTAR / <i>Acknowledgement</i></b>                                                                                                          |
| <b>vii</b> | <b>DAFTAR ISI / <i>Table of Contents</i></b>                                                                                                            |
| <b>ix</b>  | <b>DAFTAR GAMBAR / <i>List of Diagram</i></b>                                                                                                           |
| <b>xi</b>  | <b>DAFTAR LAMPIRAN / <i>List of Appendix</i></b>                                                                                                        |
| <b>1</b>   | <b>BAB.I PENDAHULUAN / <i>Introduction</i></b>                                                                                                          |
| 1          | A. LATAR BELAKANG / <i>Background</i>                                                                                                                   |
| 2          | B. TUJUAN PENELITIAN / <i>Research Objective</i>                                                                                                        |
| 3          | C. SIGNIFIKANSI PENELITIAN / <i>Significance of the Research</i>                                                                                        |
| <b>5</b>   | <b>BAB. II KERANGKA PEMIKIRAN / <i>Analytical Framework</i></b>                                                                                         |
| 6          | A. FAKTOR KELEMBAGAAN / <i>Institutional Factor</i>                                                                                                     |
| 8          | B. FAKTOR SOSIAL POLITIK / <i>Socio-Political Factor</i>                                                                                                |
| 10         | C. FAKTOR EKONOMI DAERAH / <i>Factor of Regional Economy</i>                                                                                            |
| 11         | D. FAKTOR TENAGA KERJA DAN PRODUKTIVITAS / <i>Factor of Labor and Productivity</i>                                                                      |
| 12         | E. FAKTOR INFRASTRUKTUR FISIK / <i>Factor of Physical Infrastructure</i>                                                                                |
| <b>13</b>  | <b>BAB. III METODOLOGI / <i>Methodology</i></b>                                                                                                         |
| 13         | A. RUANG LINGKUP PENELITIAN / <i>Research Scope</i>                                                                                                     |
| 13         | A.1. Daerah Pemeringkatan / <i>Regions for Rating</i>                                                                                                   |
| 14         | A.2. Daerah Penelitian Lapangan / <i>Field Research Areas</i>                                                                                           |
| 15         | B. DATA PENELITIAN / <i>Research Data</i>                                                                                                               |
| 15         | B.1 Jenis Data / <i>Type of Data</i>                                                                                                                    |
| 15         | B.2. Pengumpulan Data / <i>Data Collection</i>                                                                                                          |
| 17         | B.3. Pengolahan dan Analisis Data / <i>Data Proccesing and Analysis</i>                                                                                 |
| <b>21</b>  | <b>BAB. IV PEMAPARAN HASIL PENELITIAN / <i>Description of Survey Result</i></b>                                                                         |
| 21         | A. FAKTOR-FAKTOR DOMINAN YANG MENENTUKAN DAYA TARIK INVESTASI DAERAH / <i>Primary Factors that Determine the Attractiveness of Region to Investment</i> |
| 22         | A.1. Bobot Indikator Faktor Kelembagaan / <i>Weight of the Indicators of Institutional Factor</i>                                                       |
| 23         | A.2. Bobot Indikator Faktor Sosial Politik / <i>Weight of the Indicators of Socio-Political Factor</i>                                                  |
| 24         | A.3. Bobot Indikator Faktor Ekonomi Daerah / <i>Weightof the Indicators of Regional Economy Factor</i>                                                  |
| 25         | A.4. Bobot Indikator Faktor Tenaga Kerja dan Produktivitas / <i>Weight of the Indicators of Labor and Productivity Factor</i>                           |
| 26         | A.5. Bobot Indikator Faktor Infrastruktur Fisik / <i>Weight of the Indicators of Physical Infrastructure Factor</i>                                     |
| 28         | B. HASIL PEMERINGKATAN 134 KABUPATEN/KOTA DI INDONESIA / <i>Result of Rating to 134 Regencies/ Cities in Indonesia</i>                                  |
| 28         | B.1. Peringkat Daerah Berdasarkan Nilai Total / <i>Rating of Regions According to the Overall Score</i>                                                 |

|    |                                                                                                                                                                                                                                                                                                                           |
|----|---------------------------------------------------------------------------------------------------------------------------------------------------------------------------------------------------------------------------------------------------------------------------------------------------------------------------|
| 32 | B.2. Peringkat Daerah Berdasarkan Faktor Kelembagaan / <i>Rating of Regions According to the Institutional Factor</i>                                                                                                                                                                                                     |
| 33 | B.3. Peringkat Daerah Berdasarkan Faktor Sosial Politik / <i>Rating of Regions According to the Socio-Political Factor</i>                                                                                                                                                                                                |
| 35 | B.4. Peringkat Daerah Berdasarkan Faktor Ekonomi Daerah / <i>Rating of Regions According to the Factor of Regional Economy</i>                                                                                                                                                                                            |
| 37 | B.5. Peringkat Daerah Berdasarkan Faktor Tenaga Kerja dan Produktivitas / <i>Rating of Regions According to the Factor of Labor and Productivity</i>                                                                                                                                                                      |
| 39 | B.6. Peringkat Daerah Berdasarkan Faktor Infrastruktur Fisik / <i>Rating of Regions According to the Factor of Physical Infrastructure</i>                                                                                                                                                                                |
| 41 | C. GAMBARAN DAYA TARIK INVESTASI DAERAH KABUPATEN/KOTA / <i>Description of Attractiveness of Regencies/Cities to Investment</i>                                                                                                                                                                                           |
| 41 | C.1. Gambaran Daya Tarik Investasi Daerah Kabupaten / Kota Secara Umum / <i>General Description on Attractiveness of Regencies/Cities to Investment</i>                                                                                                                                                                   |
| 42 | C.2. Pola-Pola Daya Tarik Investasi Daerah / <i>Pattern of Investment Attractiveness</i>                                                                                                                                                                                                                                  |
| 42 | C.2.1. Sektor Usaha Manufaktur / <i>Manufacturing Sector</i>                                                                                                                                                                                                                                                              |
| 43 | C.2.2. Sektor Usaha Perdagangan dan Jasa / <i>Trade and Service Sector</i>                                                                                                                                                                                                                                                |
| 47 | C.2.3. Sektor Usaha Perkebunan / <i>Plantation Business Sector</i>                                                                                                                                                                                                                                                        |
| 49 | C.2.4. Sektor Usaha Pertambangan / <i>Mining Business Sector</i>                                                                                                                                                                                                                                                          |
| 50 | C.2.5. Sektor Usaha Peternakan / <i>Animal Business Husbandry Sector</i>                                                                                                                                                                                                                                                  |
| 51 | C.2.6. Sektor Usaha Perikanan / <i>Fishery Business Sector</i>                                                                                                                                                                                                                                                            |
| 52 | D. KEBIJAKAN DAERAH YANG BERHUBUNGAN DENGAN DUNIA USAHA / INVESTASI / <i>Regional Policies Related to Investment and Business</i>                                                                                                                                                                                         |
| 53 | D.1. Distorsi Perda-perda Terhadap Iklim Investasi di Daerah / <i>The Regional Regulation Distort Regional Investment Climate</i>                                                                                                                                                                                         |
| 54 | D.2. Kesenjangan antara Aturan Formal dengan Pelaksanaan / <i>Gap Between Formal Rules and Their Implementation</i>                                                                                                                                                                                                       |
| 55 | D.3. Pelibatan Masyarakat dalam Perumusan Perda / <i>Public Involment in the Formulation of Regional Regulation</i>                                                                                                                                                                                                       |
| 57 | D.4. Pengaruh Proses Pelibatan Masyarakat / Dunia Usaha dalam Perumusan Kebijakan Daerah terhadap Pemahaman Masyarakat / Dunia Usaha atas Kebijakan yang Dihasilkan / <i>The Process of Public and Business Involment in Formulating Policies Influences the Quality of Policies and Public Knowledge on the Policies</i> |
| 59 | D.5. Pihak-pihak yang Terlibat dalam Perumusan Kebijakan dan Pengaruhnya terhadap Kebijakan yang Dihasilkan / <i>Parties Involved in Policy Formulation and Quality of Issued Policy</i>                                                                                                                                  |
| 60 | D.6. Rendahnya PAD Memicu Munculnya Perda-Perda Distortif / <i>Low PAD Encourages the Issuance of Distorting Local Regulations</i>                                                                                                                                                                                        |
| 65 | E. USAHA-USAHA YANG DILAKUKAN OLEH DAERAH UNTUK MENINGKATKAN DAYA TARIK INVESTASI / <i>Regional Government's Effort in Encouraging Investment</i>                                                                                                                                                                         |
| 65 | E.1. Pembentukan Birokrasi Pelayanan / <i>Reform of Investment Service Bureaucracy</i>                                                                                                                                                                                                                                    |
| 68 | E.2. Perbaikan Sistem Informasi Potensi Investasi / <i>Improvement of Information System of Potential Investment</i>                                                                                                                                                                                                      |
| 69 | E.3. Perbaikan dan Penyediaan Infrastruktur Fisik / <i>Improvement and Provision of Physical Infrastructure</i>                                                                                                                                                                                                           |
| 71 | <b>V. KESIMPULAN DAN SARAN / <i>Conclusion and Recommendations</i></b>                                                                                                                                                                                                                                                    |
| 71 | A. KESIMPULAN / <i>Conclusion</i>                                                                                                                                                                                                                                                                                         |
| 74 | B. SARAN / <i>Recommendations</i>                                                                                                                                                                                                                                                                                         |
| 77 | <b>LAMPIRAN / <i>Appendix</i></b>                                                                                                                                                                                                                                                                                         |

# DAFTAR GAMBAR

## *List of Diagram*

---

- 6 **Diagram 1.** Hirarki Faktor, Variabel, Indikator, dan Intensitas Pemingkatan / *Rating Variable and Factor*
- 21 **Diagram 2.** Bobot Indikator Faktor Pemingkatan / *Weight of Rating Factors*
- 22 **Diagram 3.** Bobot Indikator Faktor Kelembagaan / *Weight of the Indicators of Institutional Factor*
- 24 **Diagram 4.** Bobot Indikator Faktor Sosial-Politik / *Weight of the Indicators of Socio-Political Factor*
- 25 **Diagram 5.** Bobot Indikator Faktor Ekonomi Daerah / *Weight of the Indicators of Regional Economy Factor*
- 26 **Diagram 6.** Bobot Indikator Faktor Tenaga Kerja dan Produktivitas / *Weight of the Indicators of Labor and Productivity Factor*
- 27 **Diagram 7.** Bobot Indikator Faktor Infrastruktur Fisik / *Weight of the Indicators of Physical Infrastructure Factor*
- 28 **Grafik / Graph 1.** Peringkat 10 Besar Teratas dan Peringkat 10 Terbawah Daya Tarik Investasi Daerah Secara Total / *The First and Last Ten Rank Regions According to the Overall Value*
- 30 **Grafik / Graph 2.1** Peringkat 10 Besar Teratas Daya Tarik Investasi Daerah Secara Total / *The First Ten Rank Regions According to the Overall Value*
- 31 **Grafik / Graph 2.2** Peringkat 10 Terbawah Daya Tarik Investasi Daerah Secara Total / *The Last Ten Rank Regions According to the Overall Value*
- 32 **Grafik / Graph 3** Peringkat 10 Teratas dan Peringkat 10 Terbawah Faktor Kelembagaan / *The First and Last Ten Rank of Regions According to the Institutional Factor*
- 34 **Grafik / Graph 4** Peringkat 10 Teratas dan Peringkat 10 Terbawah Faktor Sosial-Politik / *The First and Last Ten Rank of Regions According to the Socio-Political Factor*
- 36 **Grafik / Graph 5** Peringkat 10 Teratas dan Peringkat 10 Terbawah Faktor Ekonomi Daerah / *The First and Last Ten Rank of Regions According to the Regional Economy*
- 38 **Grafik / Graph 6** Peringkat 10 Teratas dan Peringkat 10 Terbawah Faktor Tenaga Kerja dan Produktivitas / *The First and Last Ten Rank of Regions According to the Labor and Productivity*
- 40 **Grafik / Graph 7** Peringkat 10 Teratas dan Peringkat 10 Terbawah Faktor Infrastruktur Fisik / *The First and Last Ten Rank of Regions According to the Physical Infrastructure*





# DAFTAR LAMPIRAN

## *List of Appendix*

### **Lampiran 1. Hasil Pemeringkatan**

- 77 Lampiran 1.1. Peringkat Daya Tarik Investasi 134 Kabupaten / Kota di Indonesia
- 78 Lampiran 1.1.1. Neraca Faktor Peringkat Daya Tarik Investasi 134 Kabupaten Kota
- 80 Lampiran 1.1.2. Neraca Variabel Peringkat Daya Tarik Investasi 134 Kabupaten Kota
- 82 Lampiran 1.2. Peringkat Daya Tarik Investasi 97 Kabupaten di Indonesia
- 83 Lampiran 1.3. Peringkat Daya Tarik Investasi 47 Kota di Indonesia
- 84 Lampiran 1.4. Peringkat Daya Tarik Investasi Kabupaten / Kota di Pulau Jawa dan Bali
- 85 Lampiran 1.5. Peringkat Daya Tarik Investasi Kabupaten / Kota di Luar Pulau Jawa dan Bali
- 86 Lampiran 1.6. Peringkat Faktor Kelembagaan
- 87 Lampiran 1.7. Peringkat Faktor Sosial-Politik
- 88 Lampiran 1.8. Peringkat Faktor Ekonomi Daerah
- 89 Lampiran 1.9. Peringkat Faktor Tenaga Kerja dan Produktivitas
- 90 Lampiran 1.10. Peringkat Faktor Infrastruktur Fisik
- 91 Lampiran 1.11. Peringkat Daya Tarik Investasi Daerah Berbasis Perdagangan dan Jasa
- 92 Lampiran 1.12. Peringkat Daya Tarik Investasi Daerah Berbasis Manufaktur
- 93 Lampiran 1.13. Peringkat Daya Tarik Investasi Daerah Berbasis Pertambangan
- 94 Lampiran 1.14. Peringkat Daya Tarik Investasi Daerah Berbasis Perkebunan dan Kehutanan
- 95 Lampiran 1.15. Peringkat Daya Tarik Investasi Daerah Berbasis Pertanian Non Pangan

### **Lampiran 2. Daerah Penelitian**

- 96 Lampiran 2.1 Statistik Daerah Pemeringkatan (Propinsi, Kabupaten / Kota; Sektor Ekonomi Dominan; PDRB Perkapita)
- 97 Lampiran 2.2 Daftar Daerah Pemeringkatan Total (134 Daerah)
- 99 Lampiran 2.3 Statistik Daerah Penelitian Lapangan (Propinsi, Kabupaten / Kota; Sektor Ekonomi Dominan, PDRB Perkapita)
- 100 Lampiran 2.4. Daftar Daerah Penelitian Lapangan (20 Daerah)

### **Lampiran 3. Data Penelitian**

- 101 Lampiran 3. Data Penelitian - Daftar Data, Jenis Data, dan Sumber Data Pemeringkatan
- 103 *Appendix 3. Research Data - List of Data, Type of Data, and Source Data Used in Rating*

### **Lampiran 4. Faktor, Variabel, dan Indikator , Intensitas Pemeringkatan :**

- 105 Lampiran 4. Daftar Faktor, Variabel, dan Indikator Pemeringkatan
- 108 *Appendix 4. List of Factors, Variables, Indicators*
- 111 Lampiran 4.1. Metode Klasifikasi Intensitas Indikator Pemeringkatan
- 115 Lampiran 4.2. Hasil Klasifikasi Indikator Pemeringkatan
- 115 Lampiran 4.2.1. Hasil Klasifikasi Indikator Faktor Kelembagaan
- 115 Lampiran 4.2.1.1. Indikator Peraturan Daerah
- 116 Lampiran 4.2.1.2. Indikator Rasio Retribusi thd Pajak
- 119 Lampiran 4.2.1.3. Indikator Rasio Anggaran Pembangunan terhadap APBD
- 122 Lampiran 4.2.2. Hasil Klasifikasi Indikator Faktor Ekonomi Daerah
- 122 Lampiran 4.2.2.1. Variabel Potensi Ekonomi

|     |                     |                                                                                                         |
|-----|---------------------|---------------------------------------------------------------------------------------------------------|
| 122 | Lampiran 4.2.2.1.1. | Indikator PDRB Perkapita                                                                                |
| 125 | Lampiran 4.2.2.1.2. | Indikator Pertumbuhan PDRB                                                                              |
| 128 | Lampiran 4.2.2.1.3. | Indikator Indeks Pembangunan Manusia                                                                    |
| 131 | Lampiran 4.2.2.2.   | Variabel Struktur Ekonomi - Indikator Nilai Tambah Sektor Primer - Sektor Sekunder - Sektor Tersier     |
| 134 | Lampiran 4.2.3.     | Hasil Klasifikasi Indikator Faktor Tenaga Kerja dan Produktivitas                                       |
| 134 | Lampiran 4.2.3.1.   | Variabel Ketersediaan Tenaga Kerja                                                                      |
| 134 | Lampiran 4.2.3.1.1  | Indikator Penduduk Usia Produktif                                                                       |
| 137 | Lampiran 4.2.3.1.2  | Indikator Tenaga Kerja Berijasah SLTP Berpengalaman                                                     |
| 140 | Lampiran 4.2.3.1.3  | Indikator Rasio Pencari Kerja terhadap Angkatan Kerja                                                   |
| 143 | Lampiran 4.2.3.2.   | Variabel Biaya Tenaga Kerja                                                                             |
| 143 | Lampiran 4.2.3.2.1. | Indikator Biaya Tenaga Kerja Berdasarkan Aturan Formal                                                  |
| 146 | Lampiran 4.2.3.2.2. | Indikator Biaya Tenaga Kerja Aktual                                                                     |
| 149 | Lampiran 4.2.3.3.   | Variabel Produktivitas Tenaga Kerja                                                                     |
| 152 | Lampiran 4.3.       | Hirarki dan Bobot Faktor, Variabel, Indikator, Intensitas Pemingkatan                                   |
| 157 | Lampiran 4.4.       | Penghitungan Bobot Intensitas dengan Metode AHP                                                         |
| 159 | Lampiran 4.5.       | Hasil Pembobotan Intensitas Indikator dengan Metode AHP                                                 |
| 159 | Lampiran 4.5.1.     | Hasil Pembobotan Intensitas Indikator-Indikator Faktor Kelembagaan dengan Metode AHP                    |
| 164 | Lampiran 4.5.2.     | Hasil Pembobotan Intensitas Indikator-Indikator Faktor Sosial-Politik dengan Metode AHP                 |
| 169 | Lampiran 4.5.3.     | Hasil Pembobotan Intensitas Indikator-Indikator Faktor Ekonomi Daerah dengan Metode AHP                 |
| 174 | Lampiran 4.5.4.     | Hasil Pembobotan Intensitas Indikator-Indikator Faktor Tenaga Kerja dan Produktivitas dengan Metode AHP |
| 179 | Lampiran 4.5.5.     | Hasil Pembobotan Intensitas Indikator-Indikator Faktor Infrastruktur Fisik dengan Metode AHP            |

**Lampiran 5. Kajian Peraturan Daerah :**

|     |               |                                           |
|-----|---------------|-------------------------------------------|
| 184 | Lampiran 5.1. | Panduan Kajian Peraturan Daerah           |
| 189 | Lampiran 5.2. | Contoh Kajian Peraturan Daerah            |
| 190 | Lampiran 5.3. | Statistik Kebermasalahan Perda            |
| 191 | Lampiran 5.4. | Peraturan Daerah dan Jenis Pelanggarannya |

# I. PENDAHULUAN

## *Introduction*

### A. LATAR BELAKANG

Dari segi ekonomi, pelaksanaan otonomi daerah (OTDA) sejak 1 Januari 2001 ditunggu hasilnya apakah membawa indikasi positif ke arah perbaikan ekonomi atau sebaliknya. Adalah terlalu awal untuk menilai hasil pelaksanaan OTDA bagi perekonomian daerah maupun nasional, selain karena kondisi perekonomian nasional Indonesia saat ini yang amat berat, terlebih juga pada dasarnya pembangunan ekonomi tidak bisa dicapai dalam waktu singkat. Namun setidaknya selama hampir dua tahun pelaksanaannya, bisa dilihat beberapa indikator awal yang memberikan gambaran arah pembangunan ekonomi yang tepat atau tidak, utamanya ketika berbicara mengenai faktor kelembagaan yang berada di bawah kendali pemerintah daerah dalam memfasilitasi aktivitas ekonomi baik dalam kebijakannya maupun dalam praktik pelaksanaan.

Mencermati pembangunan ekonomi daerah menjadi semakin penting mengingat Indonesia tergabung dalam organisasi perdagangan global, yang mulai 1 Januari 2003 sepenuhnya memasuki AFTA, juga dalam keterkaitannya dalam kesepakatan perdagangan global lainnya dalam APEC dan WTO. Sebagai bagian dari NKRI, daerah daerah otonom terikat dan harus mengikuti praktik perdagangan global tersebut. Pasar yang semakin luas dengan hambatan tarif nol di hampir semua komoditi selain mendatangkan suatu kesempatan, juga membawa ancaman bagi produk produk Indonesia. Kata kuncinya adalah persaingan; bagaimana Indonesia dengan daerah daerah otonomnya mampu membangun keunggulan bersaing nasional sehingga Indonesia dapat mengambil manfaat globalisasi, bukannya justru termakan oleh globalisasi itu.

Tantangan globalisasi tersebut semestinya mendorong daerah daerah otonom untuk memposisikan dirinya secara tepat; sayangnya berbagai laporan penelitian menunjukkan bahwa banyak daerah otonom justru mempunyai kecenderungan

### A. BACKGROUND

*From economic point of view, the implementation of regional autonomy (OTDA) since January 1, 2001 still does not provide any clear indication concerning whether or not a positive economic development impact will be the end. Any assessment on this matter, however, needs to be done very carefully since the present disappointing national economic situation might confuse such assessment. The fact that any strategy toward economic development always requires a long period of time also suggests caution of any premature assessment. But at least, in its two years of implementation, some early indicators can be identified upon which its possible contribution toward economic development may be estimated, especially the striking ones, namely institutional factors, which are under the control of regional government that is expected to facilitate economic activities through its policies and practices.*

*As Indonesia's entire economy is increasingly integrating with global economy, as manifested in the application of AFTA (ASEAN Free Trade Area) effective on January 1, 2003, and its preceding participation in global trading agreement through APEC and WTO, attention on regional economic development is becoming more and more important. As part of the Unitary State of the Republic of Indonesia (NKRI), autonomous regions have no other choice but to be bound and follow the practices of the global trade. Increasingly extended markets with zero tariffs in nearly all commodities bring not only opportunities but also threat for Indonesian products. The key word for the survival in this era is nothing but competition: how Indonesia, including its autonomous regions, can develop national competitiveness so as to ensure that it can gain and enjoy the benefits of globalization, and not to loose in the competition.*

*Such challenge brought about by globalization is supposed to encourage autonomous regions here to position themselves in a right track ready to exploit any possible benefits. But, unfortunately, as various researches show, many of the autonomous regions tend to have no*

mengembangkan berbagai pungutan baik pajak maupun retribusi terhadap dunia usaha, yang mengakibatkan biaya ekonomi tinggi pada skala nasional. Ada juga daerah-daerah yang cenderung mengembangkan kebijakan ekonomi eksklusif dan diskriminatif. Salah satu penyebabnya adalah kewenangan sebagai daerah otonom diterjemahkan baru sebatas keleluasaan untuk membuat berbagai kebijakan. Akibatnya banyak dijumpai kebijakan-kebijakan yang dibuat tersebut justru berdampak inflatoir - jika tidak dikatakan justru menciptakan ketidakpastian baru - yang kontraproduktif bagi peningkatan investasi dan aktivitas ekonomi lainnya. Seperti kebijakan daerah yang hanya berorientasi jangka pendek dan terfokus pada peningkatan PAD, tanpa memperhatikan dampaknya terhadap perekonomian secara berkelanjutan.

Pada aspek yang lain, ketidakstabilan politik di tingkat nasional dan di beberapa daerah, dan gangguan keamanan yang sering terjadi terhadap kegiatan usaha di berbagai daerah juga masih menghawatirkan investor. Kurangnya data-data dan informasi mengenai potensi perekonomian yang dimiliki oleh daerah juga merupakan kendala dalam upaya meningkatkan daya tarik daerah terhadap investasi.

Melanjutkan upaya yang telah dibuatnya tahun 2001, KPPOD (Komite Pemantauan Pelaksanaan Otonomi Daerah) kembali melakukan pemeringkatan daya tarik investasi daerah otonom Kabupaten/Kota di Indonesia tahun 2002, yang dimaksudkan untuk menjawab beberapa pertanyaan berikut :

1. Faktor-faktor apa yang dominan dalam menentukan daya tarik daerah terhadap investasi berdasarkan persepsi dunia usaha ?
2. Seperti apakah peringkat daya tarik daerah Kabupaten / Kota terhadap investasi dalam persepsi dunia usaha ?
3. Seperti apakah gambaran daya tarik investasi di daerah Kabupaten / Kota di Indonesia dalam persepsi dunia usaha ?
4. Seperti apakah kebijakan-kebijakan daerah yang berhubungan dengan investasi dan dunia usaha ?
5. Upaya apa saja yang dilakukan oleh pemda untuk menarik investasi ke daerahnya ?

## B. TUJUAN PENELITIAN

1. Mengidentifikasi faktor-faktor yang dominan dalam menentukan daya tarik Kabupaten / Kota terhadap Investasi berdasarkan persepsi dunia usaha.

*concern on improving their attractiveness. Immediate needs in meeting revenue target seem to have been leading regional governments to take short-cut solutions, among others, by imposing various taxes and retributions for business community, producing high cost to the economy nationwide. Understanding regional autonomy simply as freedom in policy making, some of the regions are even developing exclusive and discriminatory economy. As a result, many of the policies produce counter-productive inflationary impact –and, indeed, as a whole, new uncertainties– in an era when effort to boost investment and other economic activities should be put in priority. This is manifested in many regional policies that are short-term in nature, learning toward the increase of Regional Original Revenue (PAD) unmindful of their impact on the sustainability of the economy.*

*On other aspects, political instability at the national level and in several regions, and frequent security disturbances to business activity in some regions still give apprehension to the investors. The lack of data and information on the economic potential of regions also hamper effort to enhance attractiveness of regions to investment.*

*As an extension of the effort it made in 2001, the Regional Autonomy Watch (KPPOD) once more conducted an investment attractiveness rating on autonomous Regencies/Cities in Indonesia in 2002, intended to answer the following questions:*

1. *What are the dominant factors determining regional attractiveness to investment from the perception of business community?*
2. *How does business community rank the attractiveness of Regency/City to investment?*
3. *How can the investment attractiveness of Regencies/Cities in Indonesia as perceived by business community be described?*
4. *How are regional policies related to investment and business community?*
5. *What are the efforts done by regional governments to attract investment in their regions?*

## B. RESEARCH OBJECTIVES

1. *To identify the dominant factors determining the attractiveness of Regency/ City to investment from the perspective of the business community.*

2. Membuat pemeringkatan daya tarik daerah terhadap investasi berdasarkan persepsi dunia usaha.
3. Membuat gambaran daya tarik investasi daerah berdasarkan persepsi duni usaha.
4. Membuat gambaran kebijakan daerah khususnya yang berhubungan dan bertujuan untuk peningkatan investasi dan kegiatan usaha.
5. Melihat upaya-upaya yang dilakukan oleh pemda untuk meningkatkan daya tarik daerahnya terhadap investasi.

2. *To rate investment attractiveness of the regions based on the perception of business community.*
3. *To describe investment attractiveness of the regions as perceived by the business community.*
4. *To describe policies especially related to and aimed at increasing investment and business activities.*
5. *To describe the efforts done by regional governments to boost investment attractiveness of their regions.*

### C. SIGNIFIKANSI PENELITIAN

1. Sebagai suatu panduan bagi kalangan dunia usaha atau investor dalam membuat keputusan berinvestasi.
2. Dapat membantu daerah-daerah dalam melihat daya tariknya terhadap investasi ditinjau dari berbagai aspek.
3. Sebagai masukan kepada pembuat kebijakan daerah, khususnya dalam pembuatan kebijakan yang berhubungan dengan investasi dan dunia usaha (perda - pajak, retribusi, dan perizinan, dll) agar tidak semata-mata untuk meningkatkan PAD dan mendistorsi perekonomian daerah.

### C. SIGNIFICANCE OF THE RESEARCH

1. *As guideline for business community and investors in making investment decision.*
2. *As tool for the regions in analyzing their investment attractiveness viewed from various aspects.*
3. *As input for regions, especially in policy making related to investment and business community (regional regulations –taxation, retribution, permits, etc.) to avoid the tendency of producing any policy oriented to increasing Regional Original Revenue, which is in fact distorting regional economy.*



## II. KERANGKA PEMIKIRAN

### *Analytical Framework*

Berkaitan dengan persepsi dunia usaha tentang daya tarik investasi suatu negara atau daerah, beberapa studi yang telah dilakukan memperlihatkan bahwa penanaman modal baik dalam bentuk penanaman modal dalam negeri maupun asing membutuhkan adanya iklim usaha yang sehat dan kemudahan serta kejelasan prosedur penanaman modal. Secara umum investasi akan masuk ke suatu daerah tergantung dari daya tarik daerah tersebut terhadap investasi, dan adanya iklim investasi yang kondusif. Keberhasilan daerah untuk meningkatkan daya tariknya terhadap investasi salah satunya tergantung dari kemampuan daerah dalam merumuskan kebijakan yang berkaitan dengan investasi dan dunia usaha serta peningkatan kualitas pelayanan terhadap masyarakat. Kemampuan daerah untuk menentukan faktor-faktor yang dapat digunakan sebagai ukuran daya saing perekonomian daerah relatif terhadap daerah lainnya juga sangat penting dalam upaya meningkatkan daya tariknya dan memenangkan persaingan. Hal yang juga penting untuk diperhatikan dalam upaya menarik investor, selain makroekonomi yang kondusif juga adanya pengembangan sumber daya manusia dan infrastruktur dalam artian luas. Hal ini menuntut perubahan orientasi dari peran pemerintah, yang semula lebih bersifat sebagai regulator, harus diubah menjadi supervisor, sehingga peran swasta dalam perekonomian dapat berkembang optimal.

Dalam penelitian ini, sejumlah variabel - konsep yang mempunyai variasi nilai / intensitas / jumlah yang menggambarkan atribut dari variabel tersebut; - digunakan untuk menentukan daya tarik investasi suatu daerah. Berdasarkan identifikasi tingkat dan elemen-elemen untuk tujuan pemeringkatan daya tarik daerah Kabupaten/Kota terhadap investasi, dan untuk menjawab pertanyaan-pertanyaan dalam penelitian ini; dari pemahaman studi literatur, opini para pelaku usaha, masukan para ahli dan hasil pemeringkatan yang dilakukan KPPOD sebelumnya; variabel-variabel yang mempengaruhi daya tarik investasi daerah dapat dikelompokkan kedalam 5 (lima) faktor sebagai berikut : I. Kelembagaan, II. Sosial Politik, III. Ekonomi Daerah, IV. Tenaga Kerja dan Produktivitas, V. Infrastruktur Fisik,

*Several studies on the perception of business community on investment attractiveness of certain region or state reveal that investment, both as domestic and foreign, requires favorable business climate and easy and clear investment procedures. By and large, the flow of investment into the region depends on investment attractiveness of that region and favorable investment climate. The success of a region in increasing its attractiveness to investment, for one thing, depends on its ability to formulate policies on investment and business community as well as increasing service quality for the people. The ability of region to determine factors that can be used as measurement of its regional economic competitiveness vis-à-vis other regions is also very important to increase attractiveness and win the competition. One of the very important factors that should be considered in attracting investors, besides favorable macro-economy, is the development of human resource and infrastructure in broad sense. This demands a shift in orientation of government role as regulator into supervisor, to optimally develop the role of private sectors in the economy.*

*In this research, several variables -concepts that have variability in value/intensity/number attributable to such variables- are used to determine investment attractiveness of any region. Study of related literature, opinion of business actors, input from experts, and results of rating previously done by KPPOD are the guides in identifying the levels and elements of variables, so as to ensure proper application of those variables in answering the research questions and meeting the objectives of rating on investment attractiveness of Regency/City. At the end, the variables that influence regional investment attractiveness applied here can be classified into 5 (five): I. Institution, II. Socio-political Condition, III. Regional Economy, IV. Labor and Productivity,*

seperti terlihat pada Diagram 1. di bawah ini.

and V. Physical Infrastructure. (see Diagram 1.)

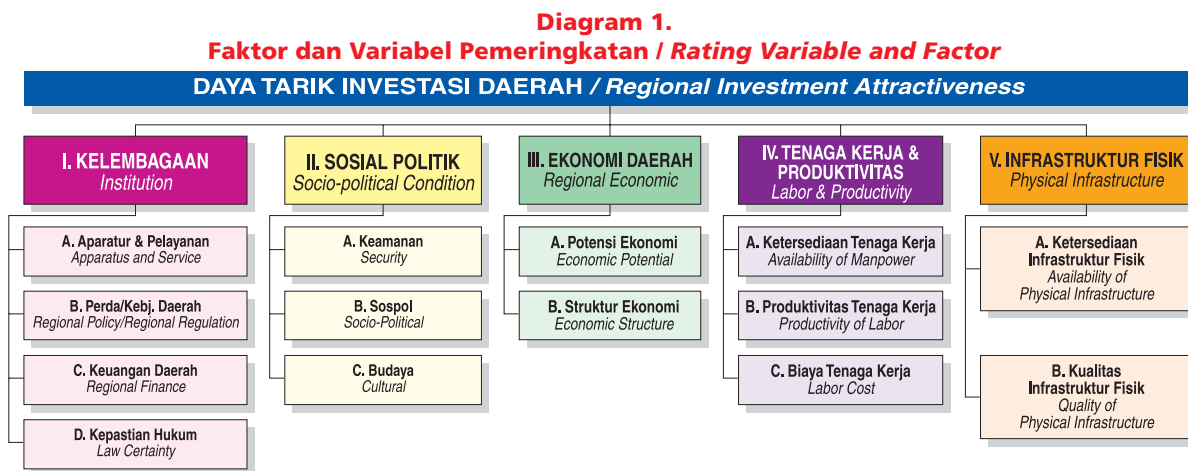

Penjabaran dan pengembangan kelima faktor/ kelompok variabel tersebut ke dalam masing-masing indikator dari setiap variabel, dilakukan juga atas dasar studi literatur, diskusi dengan para ahli dan kalangan dunia usaha. Penjabaran dari variabel-variabel yang digunakan untuk penelitian ini, dapat dijelaskan dengan diagram hirarkhi sebagaimana terlampir, yang diuraikan dalam penjelasan di bawah ini.

*The elaboration and development of the five groups of variables/factors into indicators for every variable is also done based on study of related literature, and discussion with experts and business community. The elaboration of variables used in this research is explained in the enclosed hierarchical diagram, but the following explanation can provide their more operational definitions.*

## A. FAKTOR KELEMBAGAAN

Kelembagaan, mencakup kapasitas pemerintah dalam menjalankan fungsi-fungsi pemerintahan dalam hal kepastian dan penegakan hukum, pelayanan kepada masyarakat, perumusan kebijakan, dan pembangunan daerah. Dalam penelitian ini, faktor kelembagaan terbagi dalam 4 (empat) variabel, yaitu :

### A.1. Variabel Kepastian Hukum

Yang dimaksud dengan kepastian hukum disini adalah adanya konsistensi peraturan dan penegakan hukum di daerah. Konsistensi peraturan yang dimaksud adalah adanya peraturan yang dapat dijadikan pedoman untuk suatu jangka waktu yang cukup, sehingga tidak terkesan setiap pergantian pejabat selalu diikuti pergantian peraturan yang bisa saling bertentangan. Sedangkan penegakan hukum dilihat dari kualitas aparat penegak hukum dalam melakukan penegakan peraturan dan keputusan pengadilan tanpa membedakan subyek hukum. Termasuk dalam variabel kepastian hukum yang dilihat adalah keberadaan pungutan liar diluar birokrasi yang dapat terjadi baik di jalur distribusi maupun tempat produksi. Indikator lain dalam variabel ini adalah hubungan antara eksekutif dan legislatif; bilamana hubungan kedua unsur pemerintahan itu terjalin baik

## A. INSTITUTIONAL FACTOR

*Institution includes government capacity in performing governmental functions in terms of providing law certainty and law enforcement, public service, policy formulation, and regional development. In this research, institutional factor is divided into 4 (four) variables, namely:*

### A.1. Variable of Law Certainty

*Law certainty here refers to the consistency of rules and law enforcement in the region. This means that there are rules that can be used as guidance for enough length of time, which is not subject to frequent change due to succession of official. Whereas law enforcement is viewed from the capacity of law enforcers to enforce rules and court verdicts without discriminating law subjects. Included in the variable of law certainty observed here is the presence of illegal levy that operate both in distribution and production places. Another indicator under this variable is the relationship between executive and legislative governmental bodies. If the relation of said governmental branches is good, law certainty would be more apparent in broad sense (in business practice,*

maka akan kondusif bagi kepastian hukum dalam pengertian luas (dalam praktik dunia usaha, aturan formal bisa terabaikan ketika terjadi perselisihan antar kedua unsur pemerintahan tersebut yang berimbas ke dunia usaha).

### A.2. Variabel Aparatur dan Pelayanan

Yang dimaksud dengan aparatur di sini adalah orang / pejabat atau pegawai pemerintah daerah yang melaksanakan fungsi administrasi pemerintah daerah dalam menyediakan pelayanan publik, infrastruktur fisik, serta merumuskan peraturan / aturan main dari aktivitas dunia usaha dan investasi. Indikator dari aparatur pemda yang diukur dalam pemeringkatan ini adalah penggunaan wewenang aparat pemda dalam menjalankan peraturan apakah terdapat penyalahgunaan wewenang atau tidak. Sedangkan dari sisi pelayanan yang di berikan oleh aparatur pemda adalah kejelasan rantai birokrasi dalam hal pengurusan perizinan dan hal hal lain terkait dengan dunia usaha serta perilaku aparat pemda dalam melakukan pelayanan.

### A.3. Variabel Kebijakan Daerah/Peraturan Daerah

Pada prinsipnya peraturan / kebijakan daerah adalah segala kebijakan atau aturan main secara formal yang dibuat dan di tetapkan oleh pemerintah daerah dalam mengatur aktivitas dunia usaha dan investasi. Kebijakan Daerah tersebut dapat berupa Peraturan Daerah (Perda) dan Keputusan Kepala Daerah (SK Bupati/Walikota) yang mengatur tentang Pajak dan Retribusi Daerah, prosedur pelayanan kepada masyarakat, dan lain-lain. Untuk keperluan penelitian ini difokuskan pada dua hal utama dalam kaitannya dengan Prosedur dan Biaya yang diatur dalam Perda.

Prosedur merupakan aturan main, tahapan-tahapan yang harus dilalui dan/atau persyaratan yang harus dipenuhi oleh seseorang atau sekelompok orang untuk memperoleh sesuatu hal (pelayanan publik). Dalam kasus ini hal-hal tersebut adalah yang berkaitan dengan dunia usaha, dan investasi, seperti perizinan, legalitas, perlindungan, dan sebagainya. Perda yang mengatur mengenai prosedur pelayanan terhadap dunia usaha / investasi yang menarik para investor biasanya adalah yang antara lain memuat kemudahan dalam birokrasi pelayanan usaha, konsistensi kebijakan pemda, harmonisasi antar produk hukum, tidak adanya hambatan-hambatan birokrasi dan sebagainya. Dalam hal Biaya, berbagai pungutan wajib terhadap masyarakat dan dunia usaha yang diatur dalam peraturan daerah tentang pajak dan retribusi yang

*formal rules are easily ignored if there is conflict between governmental branches which interfere business).*

### A.2. Variable of Apparatus and Service

*Apparatus here refers to the person/official or regional government employee responsible in the administration of regional government in providing public service, physical infrastructure, and formulating regulations on business activities and investment. The indicators under regional government apparatus measured in this rating include the use of authority of regional government apparatus to enforce rules, regardless of the existence of abuse of authority or its absence; and in terms of provision of service by regional government apparatus, the clarity of bureaucracy chain in permit handling and other things related with business community and the behavior of regional government apparatus in providing such service.*

### A.3. Variable of Regional Policy/Regulation

*Basically, regional regulation/policy refers to all formal policies or implementing rules that are stipulated and established by regional government in regulating the activity of business community and investment. This Regional Policy can be in the form of Regional Regulation (Perda) and Decision of the Regent/Mayor (SK Bupati/Walikota) that regulate Regional Tax and Retribution, public service procedures, etc. This research, however, focuses on two main aspects: Procedure and Tariff as regulated in Regional Regulation (Perda).*

*Procedure is the rule of the game, stages that must be undertaken and/or requirements that must be fulfilled by anyone or any group to get something (public service). In this case, they are those that are related to business community, and investment, like securing of permit, legalization, protection, etc. Regional Regulations regulating service procedure for business community/ investment that attract investors are usually those which provide ease in business service procedure, consistency of regional government policy, harmony among legal products, absence of bureaucratic barriers, etc. In terms of tariff, focus was directed to various mandatory levies applied to public and business communities regulated in regional regulation regarding tax and retribution intended*



hanya sekedar ditujukan untuk peningkatan PAD tanpa mempertimbangkan prinsip-prinsip ekonomi, filosofi pungutan dan dampak terhadap perekonomian berkelanjutan, merupakan distorsi bagi kegiatan usaha dan investasi. Distorsi dari pungutan tersebut bisa terjadi pada harga komoditas, hambatan lalu lintas perdagangan antar daerah, perda yang mengatur ketenagakerjaan, ekonomi biaya tinggi akibat pungutan berganda atau yang melampaui kewajaran, dan sebagainya. Terlampir panduan kajian Peraturan Daerah. (*Lampiran 5.1.*)

#### A.4. Variabel Keuangan Daerah

Yang dimaksud Keuangan Daerah dalam penelitian ini adalah kebijakan, strategi, dan tehknik yang diterapkan oleh pemerintah daerah dalam upaya untuk memperoleh dana, serta pembelanjaan atau pengalokasian dana-dana tersebut untuk membiayai kegiatan-kegiatan yang berkaitan dengan fungsi atau tugas pemerintahan yang diemban oleh pemda (pelayanan, pembangunan, dan lain-lain). Kebijakan pemerintah daerah dalam menggali dana dan mengelola dana yang telah mereka peroleh untuk peningkatan perekonomian daerahnya tersebut tertuang dalam APBD. Variabel keuangan daerah ini dikelompokkan menjadi dua, yaitu struktur pungutan, dan komitmen pemda dalam pembangunan.

Struktur pungutan digunakan untuk melihat upaya pemerintah daerah dalam memperoleh dana yang berasal dari pungutan yang dilakukan kepada masyarakat seperti melalui pajak dan retribusi daerah serta pungutan lainnya. Dalam penelitian ini dilihat rasio antara retribusi terhadap pajak daerah, dengan asumsi bahwa rasio retribusi yang lebih kecil dari pajak akan mendukung dunia usaha, karena pada umumnya struktur pungutan dalam pajak relatif lebih jelas dibanding pungutan dalam retribusi. Sedangkan struktur pembelanjaan APBD digunakan untuk melihat komitmen pemerintah daerah dalam melakukan pelayanan publik. Dalam hal ini dilihat rasio anggaran pembangunan terhadap pengeluaran daerah untuk membiayai kegiatan-kegiatan pembangunan yang merupakan indikasi komitmen pemerintah daerah dalam melakukan pembangunan infrastruktur fisik yang diperlukan untuk mendukung kegiatan usaha, dan mendorong perekonomian daerah.

#### B. FAKTOR SOSIAL POLITIK

Yang dimaksud dengan kondisi sosial politik daerah adalah berbagai dampak atau akibat dari hubungan timbal balik antara segi kehidupan ekonomi dengan segi kehidupan politik, antara segi hukum dan segi kehidupan agama, segi kehidupan politik dan keamanan

*only for increasing PAD without considering the principles of economy, philosophy in application of levies, and its impact in terms of economic sustainability, which are distorting business and investment activities. The levies may be distorting the price of commodity, hampering inter-regional trade traffic, regional regulation regulating manpower, and producing high cost economy due to double or multiple levies applied based on very weak justification. Guidance for study of Regional Regulation is reflected in Appendix 5.1.*

#### A.4. Variable of Regional Finance

*Regional Finance encompasses all policies, strategies, and techniques applied by regional government to generate fund, and in allocating the fund to finance its function or duty as regional government (service delivery, development initiatives, etc.). The policy of regional government in generating and managing fund to boost regional economy is stipulated in APBD (Regional Budget). This variable of regional finance is grouped into two, namely levy structure, and the commitment of regional government for development.*

*Levy structure is used to see the efforts of the regional government in generating fund from the public through tax and regional retribution and other charges. In this research, the ratio between regional retribution and regional tax is considered, with the assumption that a lower ratio of retribution than that of tax supports business community, because the levy structure in tax is by and large relatively clearer than levy from retribution. Whereas the structure of Regional Budget is used to observe the commitment of regional government in public service delivery. The ratio between development budget and regional operational budget to fund development activities is considered. This is an indication of regional government's commitment in developing physical infrastructure needed to support business activity, and to promote regional economy.*

#### B. SOCIO-POLITICAL, FACTOR

*Regional socio-political condition refers to various impacts or results of reciprocal relationship between economy and politics, between law and religion, between politics and security, and so forth. This variable group is used to measure how*

dan sebagainya. Kelompok variabel ini digunakan untuk mengukur seberapa kondusif aspek sosial, politik, keamanan, dan budaya dalam mendukung perekonomian daerah dan daya tarik investasi daerah.

### **B.1. Variabel Keamanan**

Adalah situasi keamanan di daerah yang mempengaruhi kegiatan usaha/investasi, yang dapat mendukung atau menghambat aktivitas usaha/investasi dan jaminan keselamatan jiwa maupun harta. Kondisi keamanan dapat diukur dari rasa aman dan tingkat gangguan keamanan terhadap dunia usaha maupun terhadap lingkungan masyarakat tempat usaha, serta kecepatan aparat dalam menanggulangi gangguan keamanan.

### **B.2. Variabel Sosial Politik**

Kondisi sosial politik adalah keadaan di daerah yang merupakan hasil relasi antar pranata-pranata dalam satu sistem sosial di daerah, baik antar pranata politik dan pemerintahan, antar pranata sosial di masyarakat, maupun antar pranata formal dalam pemerintahan maupun antara elemen masyarakat. Beberapa aspek yang membentuk kondisi sosial politik daerah diantaranya adalah: keterbukaan birokrasi terhadap partisipasi dunia usaha dalam perumusan kebijakan yang menyangkut kepentingannya, konflik sosial antar kelompok masyarakat, stabilitas politik, dan kegiatan unjuk rasa.

### **B.3. Variabel Budaya Masyarakat**

Merupakan seperangkat ide atau gagasan yang dimiliki oleh sekelompok orang dalam wilayah tertentu, yang mendasari atau mengilhami perilaku atau tindakan baik secara individu maupun kolektif dari kelompok orang tersebut. Untuk melihat daya tarik investasi daerah terhadap investor, nilai-nilai budaya masyarakat yang dapat mendukung masuknya investasi ke suatu daerah paling tidak dibagi dalam 4 (empat) hal, yaitu keterbukaan masyarakat terhadap dunia usaha, masyarakat yang tidak diskriminatif, etos kerja masyarakat, dan adat istiadat masyarakat. Yang diperlukan oleh investor yang akan masuk ke suatu daerah adalah nilai-nilai budaya masyarakat yang terbuka terhadap masuknya dunia usaha, adanya kondisi dimana masyarakat tidak antipati terhadap suatu investasi usaha. Selain keterbukaan, perilaku nondiskriminatif dari masyarakat setempat dengan perlakuan yang sama kepada semua orang tanpa membedakan asal usul, ras, agama, gender dalam kegiatan di setiap sektor usaha sangat diperlukan oleh investor. Etos kerja masyarakat, dalam pengertian kemauan kerja keras, persaingan untuk berprestasi, jujur dan mau/mudah untuk dibina; juga

*conducive is the aspects of social, politics, security, and culture in supporting regional economy and regional investment attractiveness.*

### **B.1. Variable of Security**

*Regional security situation influences business/investment activity, either as support or impediment for the business/investment activity and security of life and property. Security condition can be measured from the sense of security and level of security disturbance toward business community and social environment where the business is, as well as the pace of apparatus in dealing with security disturbance.*

### **B.2. Variable of Socio-Political Condition**

*Socio-political condition relates to the situation in the region as a result of relationship among institutions in one social system in a region, either among formal institutions in the government, among social institutions, or between formal institutions and social institutions. Several aspects that form regional socio-political condition are among others: openness of bureaucracy for the participation of business community in formulating policy concerning their interest, social conflicts, political stability, and demonstration activity.*

### **B.3. Variable of Society's Culture**

*Culture is defined as a set of ideas possessed by a group of people in a certain area, on which behavior or attitude of the group, individually or collectively, is based. To determine regional investment attractiveness for investors, society's value that can support the influx of investment to a region is divided at least into 4 (four) aspects, namely community's openness/receptiveness toward business community, non-discriminative community, community's working ethos, and community's custom. Investors who are planning to come into a region need a culture that is open to the incoming business community, a condition in which the society is not antipathy toward any business investment. Beside openness, investors need non-discriminating attitude of the local community with the same treatment toward all people without discriminating the origin, race, religion, and gender in every business sector. In opening a business in a certain area, investors also consider the community's working ethos – reflected in their willingness to work hard – competition*



menjadi pertimbangan investor untuk membuka usaha di suatu daerah. Bila masyarakat setempat mempunyai etos kerja yang baik maka akan memudahkan investor dalam rekrutmen pekerja tanpa harus mendatangkan tenaga kerja dari luar daerah tersebut. Hal lain yang juga dipertimbangkan oleh investor adalah adat istiadat, khususnya adat istiadat masyarakat setempat yang tidak mengganggu produktivitas usaha.

### C. FAKTOR EKONOMI DAERAH

Merupakan ukuran kinerja sistem ekonomi daerah secara makro. Perekonomian daerah mencakup beberapa hal, antara lain variabel utama makro ekonomi (seperti total output / PDRB, tingkat harga, dan kesempatan kerja) yang membentuk struktur ekonomi daerah. Perekonomian daerah digunakan untuk mengukur daya dukung potensi ekonomi, (ketersediaan sumber daya alam, dan lain-lain), serta struktur ekonomi terhadap kegiatan usaha / investasi.

#### C.1. Variabel Potensi Ekonomi

Potensi ekonomi daerah : mencakup potensi fisik dan non fisik dari suatu daerah/wilayah seperti penduduk / manusia, sumber daya alam, sumber daya buatan dan sumber daya sosial. Faktor penduduk yang dianalisis dalam kaitannya dengan daya tarik investasi daerah adalah kemampuan masyarakat untuk memenuhi kebutuhan hidupnya, yang dapat dilihat dari PDRB perkapita. PDRB perkapita merupakan nilai PDRB atas dasar harga berlaku dibagi jumlah penduduk di suatu daerah. Selain itu potensi ekonomi juga dapat dilihat dari kecepatan pertumbuhan ekonomi, yaitu rata-rata pertumbuhan nilai PDRB atas dasar harga konstan dari suatu periode / tahun terhadap periode / tahun sebelumnya. Indikator IPM juga digunakan sebagai identifikasi potensi ekonomi yang menggambarkan kemampuan masyarakat setempat dalam cakupan yang luas.

#### C.2. Variabel Struktur Ekonomi

Jumlah nilai tambah bruto seluruh sektor kegiatan ekonomi yang terjadi / muncul di suatu daerah, digunakan untuk melihat struktur ekonomi daerah yang bersangkutan, yang semuanya terukur dalam PDRB. Basis struktur perekonomian terlihat dari kontribusi sektor-sektor ekonomi tertentu terhadap nilai bruto seluruh sektor yang ada di daerah tersebut (nilai tambah sektoral). Berdasarkan kontribusi sektoral tersebut dapat dilihat apakah struktur ekonomi daerah yang bersangkutan berbasis sumber daya alam (primer), sudah terbiasa dalam kegiatan ekonomi produktif dan industrialisasi (sekunder), dan pada jasa pelayanan dan

*for achievement, honesty and willingness/flexibility to develop. If the surrounding community has good working ethos, investors will find it easy to recruit employees without importing workers from outside the area. Another thing considered by investors is custom, especially local community's custom that does not disturb business productivity.*

### C. FACTOR OF REGIONAL ECONOMY

*Regional economy measures the performance of macro regional economic system. Regional economy includes several aspects, such as macro economic main variables (like total output/PDRB, price level, and job opportunity) that form regional economic structure. Regional economy is used to measure the capacity of the regional economy (natural resources, etc), and economic structure toward business/ investment activities.*

#### C.1. Variable of Economic Potential

*Regional economic potential includes the potential of physical and non-physical resources of any area like population/human resources, natural resources, man-made resources, and social resources. The population factor analyzed in relation to regional investment attractiveness is the society's capability to meet their need, which can be seen from Gross Regional Domestic Product (PDRB) per capita. PDRB per capita is the value of PDRB based on prevailing market price divided by the population of the region. Moreover, economic potential can also be seen from economic growth, that is the average of PDRB growth value based on constant price of a certain period/year against the previous period/year. Human Development Index (IPM) indicator is also used as one of the indications of economic potential that describes the local community's ability in a broad scope.*

#### C.2. Variable of Economic Structure

*The amount of gross value-added of all economic activities that transpired in a certain area is used to analyze the economic structure of a region, all of which are measured in PDRB. Economic structure is seen from the contribution of certain economic sectors to the gross value of all sectors in the area (value-added by sector). Based on this contribution by sector we can see whether the relevant regional economic structure is based on natural resources (primary), accustomed to productive economic activities and industrialization (secondary), and on service and*

perbankan (tersier). Indikator indikator struktur ekonomi tersebut penting bagi investor untuk mengetahui kegiatan ekonomi yang telah berkembang di daerah yang bersangkutan.

#### **D. FAKTOR TENAGA KERJA DAN PRODUKTIVITAS**

Tenaga kerja merupakan faktor produksi yang sangat penting dalam pembentukan nilai tambah suatu kegiatan ekonomi. Selain itu pekerja yang merupakan sumber daya manusia adalah komponen utama dari pembangunan karena pelaku utama pembangunan adalah manusia. Untuk melihat gambaran tentang berapa besar nilai tambah suatu kegiatan ekonomi yang diberikan oleh setiap pekerja pada suatu kegiatan ekonomi dapat dilihat dengan menghitung produktivitas tenaga kerja. Beberapa hal yang berhubungan dengan ketenagakerjaan yang dapat mempengaruhi daya tarik terhadap investasi adalah :

##### **D.1. Variabel Ketersediaan Tenaga Kerja**

Untuk kegiatan investasi / usaha diperlukan adanya tenaga kerja yang cukup tersedia, baik yang belum berpengalaman maupun yang sudah berpengalaman. Tenaga kerja tersebut dapat diperoleh dari daerah yang bersangkutan atau dengan mendatangkan dari daerah lain. Ketersediaan tenaga kerja yang dibutuhkan oleh sebuah kegiatan usaha dilihat dari rasio jumlah penduduk usia produktif; rasio pencari kerja terhadap angkatan kerja; maupun tenaga kerja dengan basis pendidikan minimal SLTP yang sudah memiliki pengalaman kerja.

##### **D.2. Variabel Biaya Tenaga Kerja,**

Yaitu tingkat kompensasi untuk pekerja secara keseluruhan sebagai biaya yang dikeluarkan oleh pengusaha, yang biasanya merupakan upah atau gaji untuk pekerjanya. Pedoman normatif pengupahan yang ditetapkan pemerintah UMP/UMK menjadi faktor penting bagi pengusaha dalam mengkalkulasi bisnisnya. Selain panduan normatif yang ada, investor juga membutuhkan 'pasar' upah yang berlaku di daerah yang bersangkutan berupa upah yang sebenarnya diterima oleh para pekerja yang mungkin bisa lebih tinggi atau lebih rendah dari UMP/UMK; asumsinya semakin kecil upah menjadi semakin menarik bagi investor.

##### **D.3. Variabel Produktivitas Tenaga Kerja**

Pada dasarnya produktivitas tenaga kerja merupakan salah satu alat ukur atau indikator ketenagakerjaan yang dikaitkan dengan faktor ekonomi. Secara makro hanya dapat diperoleh produktivitas rata-rata pada sektor-sektor ekonomi agregatif, yaitu bukan

*banking (tertiary). The mentioned economic structure indicators are important for investors to identify the economic activity that has developed in the relevant region.*

#### **D. FACTOR OF LABOR AND PRODUCTIVITY**

*Manpower constitutes a very important production factor in the formation of value-added of an economic activity. Furthermore, human resource in the form of labor is the main component of development because the main agent of development is human being. The value-added of an economic activity (as provided by every worker in any economic activity) can be measured by counting labor productivity. Several things that have relationship with manpower, and which can influence investment attractiveness, are as follows:*

##### **D.1. Variable of Manpower Availability**

*Investment/business activity needs the availability of manpower, whether experienced or not. The labor can be obtained from the relevant region or by importing from other regions. The availability of manpower needed in a business activity can be measured by calculating the ratio of the productive age population, ratio of people looking for a job and work force, and labor of at least junior high school with work experience.*

##### **D.2. Variable of Labor Cost**

*Labor cost refers to the compensation for the entire workers as the cost expended by businessman, in the form of wage or salary. Normative guidance on wages established by the government in the form of Provincial Minimum Wage (UMP) or City Minimum Wage (UMK) becomes an important factor for businessman in calculating his business. In addition to the existing normative guidance, investor also needs wage 'market' effective in the relevant region or the wage actually accepted by workers that may be higher or lower than UMP/UMK. The assumption is that the lower the wage the more interesting the business is to the investors.*

##### **D.3. Variable of Labor Productivity**

*Essentially labor productivity is one of the indicators of labor that is closely related to economic factor. In macro level, we can only obtain average productivity on the aggregate economic sectors, that is the amount of economic (PDRB)*

besarnya produksi barang dan jasa tetapi besarnya pertumbuhan (PDRB) ekonomi. Produktivitas diukur berdasarkan besarnya PDRB di sektor tertentu dibagi dengan jumlah pekerja di sektor tersebut. Metode ini banyak kelemahan dan kurang akurat, namun demikian cara pengukuran seperti ini masih memadai untuk menunjukkan perbandingan kecenderungan peningkatan produktivitas kesempatan kerja.

## E. FAKTOR INFRASTRUKTUR FISIK

Yang dimaksud dengan infrastruktur fisik adalah berbagai instalasi dan kemudahan dasar (terutama sistem transportasi, komunikasi, dan listrik), yang sangat diperlukan oleh masyarakat dalam melakukan aktivitas perdagangan dan kelancaran pergerakan orang, barang, dan jasa dari satu daerah ke daerah atau ke negara lain dalam proses kegiatan usaha. Faktor infrastruktur fisik untuk penelitian ini dibagi menjadi dua variabel yaitu :

### E.1. Variabel Ketersediaan Infrastruktur Fisik

Untuk kelancaran kegiatan usaha perlu didukung oleh ketersediaan fasilitas atau infrastruktur fisik seperti jalan raya, kereta api, pelabuhan laut dan udara, sarana komunikasi (telpon), dan sumber energi atau penerangan (listrik).

### E.2. Kualitas dan Akses terhadap Infrastruktur Fisik

Selain ketersediaan infrastruktur fisik, kelancaran arus pergerakan faktor-faktor produksi dalam kegiatan usaha juga harus didukung oleh infrastruktur dengan kualitas yang baik. Kualitas infrastruktur selain memperlihatkan kondisi fisiknya yang siap dan layak untuk digunakan, juga menunjukkan kemudahan akses terhadap infrastruktur pendukung tersebut.

Variabel-variabel sebagaimana dijabarkan di atas merupakan variabel-variabel yang membentuk daya tarik investasi daerah (*Lampiran 4. Daftar faktor, variabel dan indikator penelitian*). Dengan menggunakan metode The Analytic Hierarchy Process (AHP) terlebih dahulu akan dilakukan pembobotan terhadap masing-masing variabel-variabel serta indikator-indikator sebagaimana dijelaskan di atas untuk menentukan bobot pengaruh tiap variabel dan indikator tersebut dalam membentuk daya tarik investasi daerah.

*growth and not the amount of goods and services produced. Productivity is measured based on the amount of PDRB in certain sector divided by the number of workers in such sector. This method has many disadvantages and is less accurate, but this way of measurement is still sufficient to compare tendency in productivity increase and job opportunity.*

## E. FACTOR OF PHYSICAL INFRASTRUCTURE

*Physical infrastructure encompasses various installations and basic facilities (especially transportation system, communication, and electricity), which are very much needed by the society in trading activity and to ease the mobilization of people, goods and service from one region to other regions or states. Physical infrastructure factor for this research is divided into two variables:*

### E.1. Variable of Physical Infrastructure Availability

*A smooth business activity requires support of the availability of facility or physical infrastructures like road, railway, harbor and airport, communication facility (telephone), energy source or electricity.*

### E.2. Quality and Access to Physical Infrastructure

*Besides the availability of physical infrastructure, a smooth production factors' movement in business activity should also be supported by good quality infrastructure. Infrastructure quality can, apart from its physical condition ready to use, also be measured by assessing the accessibility toward the relevant infrastructure.*

*Variables elaborated above are those that form regional investment attractiveness (Appendix 4. List of factors, variables, and indicators of the research). Employing the method of The Analytic Hierarchy Process (AHP), each variable as well as indicator as explained above is measured to obtain its magnitude in the framework of determining the influence of each variable and indicator on regional investment attractiveness.*



# III. METODOLOGI PENELITIAN

## *Research Methodology*

### A. RUANG LINGKUP PENELITIAN

Pemeringkatan daya tarik investasi Kabupaten / Kota di Indonesia dilakukan terhadap 134 daerah (97 Kabupaten dan 37 Kota) di 26 Propinsi dari 343 daerah (271 Kabupaten dan 72 Kota) di seluruh Indonesia. Dari 134 daerah tersebut 20 Daerah diantaranya (13 Kabupaten, 7 Kota) di 18 Propinsi dijadikan sampel untuk penelitian mendalam / penelitian lapangan, dengan tujuan untuk membuat gambaran pola-pola daya tarik investasi Daerah Kabupaten / Kota di Indonesia.

Penelitian ini difokuskan pada daerah-daerah Kabupaten dan Kota, dengan pertimbangan bahwa otonomi daerah menempatkan daerah Kabupaten/Kota sebagai ujung tombak dalam pelayanan kepada masyarakat dan pembangunan. Selain itu juga bahwa dalam kerangka AFTA, adanya pembebasan atau pengurangan tarif perdagangan barang dan jasa antar negara, menempatkan daerah Kabupaten/Kota pada posisi strategis dalam persaingan antar negara karena persaingan menjadi bergeser pada level daerah Kabupaten / Kota.

#### A.1. Pemilihan 134 Daerah Untuk Pemeringkatan

Penentuan daerah yang diteliti didasarkan pada pertimbangan dan tahapan sebagai berikut :

1. Dipilih daerah-daerah yang kontribusi salah satu atau lebih PDRB sektoral terhadap total PDRB minimal sebesar 20%. Sektor-sektor tersebut adalah :
  - (1). Pertanian Non Pangan (Perkebunan, Perikanan, dan Kehutanan),
  - (2). Industri Pengolahan (Manufaktur),
  - (3). Pertambangan, dan
  - (4). Sektor Perdagangan (Perdagangan Besar, Eceran, Hotel dan Restoran).

Pertimbangan memilih sektor-sektor tersebut sebagai dasar penarikan sampel karena sektor-sektor dapat digunakan untuk melihat daya dukung perekonomian daerah dan menjadi

### A. RESEARCH SCOPE

*The rating on investment attractiveness of Regency/City in Indonesia covers 134 regions (97 regencies and 37 cities) in 26 provinces from 343 regions (271 regencies and 72 cities) all over Indonesia. Out of the 134 regions, 20 regions (13 regencies and 7 cities) in 18 provinces are taken as samples for the intensive field research to get the description of investment attractiveness pattern of regencies/cities in Indonesia.*

*The research focuses on the regencies and cities, since regional autonomy emphasizes regencies and cities as front liners in service delivery to the people and in the process of development. Apart from that, in the AFTA framework on tariff exemption and reduction of international goods and service trade barriers, regencies and cities are placed in strategic position in the competition among nations, in the sense that competition is expected to happen more at the regency and city level.*

#### A.1. Selecting 134 Regions for Rating

*The regions were chosen for this rating following these considerations and phases:*

1. *Regions were selected on the basis that one or more of the following sectors recorded at least 20% of the total PDRB:*
  - (1) *Non-food Agricultural Sector (Plantation, Fishery and Forestry),*
  - (2) *Manufacture,*
  - (3) *Mining, and*
  - (4) *Trading Sector (Groceries, Retailing, Hotel and Restaurant).*

*Those sectors are chosen as sample to observe their economic capacity and as investment target. Each sector must have a contribution of at least 20%, because it is assumed that*

sasaran investasi. Sedangkan pertimbangan besarnya kontribusi PDRB masing-masing sektor minimal sebesar 20%, karena diasumsikan bahwa dengan kontribusi sebesar 20% memperlihatkan bahwa di daerah yang bersangkutan telah terjadi aktivitas ekonomi produktif (terutama pada sektor-sektor yang bersangkutan) yang dapat menunjang kegiatan investasi. Dengan cara seperti ini terpilih sebanyak 226 Daerah (172 Kabupaten dan 54 Kota dari 30 Propinsi).

2. Dari 226 daerah yang terpilih pada tahap pertama dilihat ketersediaan data pendukung untuk analisis (variabel dan indikator) daya tarik daerah terhadap investasi dalam penelitian ini; seperti data PDRB, APBD, Ketenagakerjaan, Peraturan Daerah dan sebagainya. Terdapat 134 daerah (97 Kabupaten dan 37 Kota) yang berasal dari 26 Propinsi yang mempunyai kelengkapan data pendukung (variabel/indikator) untuk dapat dianalisis, dan yang akhirnya dijadikan obyek penelitian untuk pemeringkatan. (*Lampiran 2.2.*)

#### A.2. Pemilihan 20 Daerah Penelitian Lapangan

Dalam penelitian ini diambil 20 daerah dari 134 daerah pemeringkatan, yang selanjutnya akan diamati secara mendalam melalui penelitian lapangan. Penelitian lapangan terhadap 20 daerah bukan dimaksudkan untuk membuat generalisasi iklim investasi Indonesia, tetapi lebih dimaksudkan untuk mendapatkan ilustrasi dari pola-pola daya tarik investasi daerah-daerah di Indonesia. Ke-20 daerah yang dipilih untuk penelitian lapangan yang dapat menggambarkan keberagaman daerah-daerah di Indonesia, dengan mempertimbangkan keterwakilan dilihat dari struktur dan potensi ekonomi, persebaran wilayah, serta keterwakilan daerah rural dan urban.

Dasar yang digunakan sebagai pertimbangan dalam menentukan 20 daerah untuk penelitian lapangan adalah sebagai berikut :

1. Daerah-daerah yang struktur ekonominya memperlihatkan sebagai daerah sentra sektor-sektor ekonomi antara lain :
  - (1) Daerah sentra Perkebunan,
  - (2) Daerah sentra Kehutanan,
  - (3) Daerah sentra Perikanan,
  - (4) Daerah sentra Pertambangan,
  - (5) Daerah sentra Industri Pengolahan (Manufaktur), dan
  - (6) Daerah sentra Perdagangan.

Untuk memperoleh daerah-daerah yang mewakili masing-masing sentra sektoral seperti di atas dipilih Kabupaten / Kota yang termasuk 10 besar dalam

*the contribution of at least 20% indicates the presence of productive economic activities in particular area (especially for the related sectors), which can support investment activities. There are 226 selected areas (172 regencies and 54 cities from 30 provinces) arranged through this selection method.*

2. *The selected 226 regions were then further analyzed using supporting data available for the regional investment attractiveness analysis (variables and indicators) in this research; like PDRB, APBD, manpower, Regional Regulation and the like. There are 134 regions (97 regencies and 37 cities) in 26 provinces with complete supporting data (variables/ indicators) for analysis, and finally decided as research objects for this rating (Appendix 2.2.)*

#### A.2. Selecting 20 Field Research Areas

*This research covers 20 regions from the entire 134 areas ranked as regions under detailed observation through field research. The field research to the 20 regions is not intended to generalize the investment condition in Indonesia but rather to get the pattern of regional investment attractiveness in Indonesia. The 20 regions were chosen for field research because of the intention of describing the diversity of the regions in Indonesia, taking into account their representativeness in the light of differences in economic structures and potentials, regional diversity, and array of urban and rural characteristics.*

*The criteria to select the 20 field research areas are as follows :*

1. *Regions with economic structure representing sectoral economic centers are as follows:*
  - (1) *Plantation center region,*
  - (2) *Forestry center region,*
  - (3) *Fishery center region,*
  - (4) *Mining center region,*
  - (5) *Manufacture Industry region, and*
  - (6) *Commercial Center region.*

*To obtain the regions that can represent each economic sector as mentioned above, the ten biggest regencies/cities in terms of their sectoral*



kontribusi PDRB sektoral terhadap total PDRB-nya, sehingga diperoleh sekitar 70 Daerah Kabupaten / Kota.

2. Dari daerah-daerah sentra kegiatan perekonomian sektoral tersebut secara proporsional dipilih daerah-daerah yang mewakili persebaran wilayah Indonesia, yaitu daerah-daerah Indonesia Bagian Barat, Indonesia Bagian Tengah, dan Indonesia Bagian Timur, Jawa-Bali dan Luar Jawa-Bali;
3. Kemudian secara proporsional juga dipilih daerah-daerah yang mewakili daerah urban (kota) dan rural (Kabupaten). (*Lampiran 2.4. Daftar 20 Daerah untuk Penelitian Lapangan*)

## B. DATA PENELITIAN

### B.1. Jenis Data

Data-data yang digunakan untuk penelitian ini merupakan gabungan antara data primer kuantitatif dan kualitatif yang diperoleh dengan melakukan survei dan melalui field research, serta data sekunder berupa existing statistic data.

#### 1. Data Primer;

- Data bobot faktor, variabel, dan indikator yang mempengaruhi daya tarik terhadap investasi, berdasarkan persepsi dunia usaha.
- Data persepsi dunia usaha berkaitan dengan daya tarik investasi suatu daerah.

2. **Data Sekunder** berupa data-data statistik daerah yang dikumpulkan pada penelitian terdahulu maupun laporan yang diberikan oleh pemerintah, diantaranya adalah Perda, Data Ekonomi, Ketenagakerjaan, Infrastruktur, Demografi dan sebagainya.

(*Lampiran 3. Daftar Data dan Jenis Data*).

### B.2. Pengumpulan Data

- (1) Data pembobotan masing-masing faktor, variabel dan indikator dilakukan melalui wawancara (*face to face interview*) dengan bantuan kuesioner *The Analytic Hierarchy Process* (AHP) kepada 2 sampai dengan 3 orang responden pengusaha daerah di setiap daerah penelitian dari 20 daerah penelitian, dan 7 orang pengusaha nasional, serta 3 orang pengamat ekonomi dari Jakarta.
- (2) Pengumpulan data persepsi dunia usaha tentang daya tarik investasi daerah dilakukan dengan survei menggunakan kuesioner (daftar pertanyaan terstruktur) yang disebar secara *mail questionnaires* ke 10 responden di 114

*contributions to the total PDRB are taken, resulting in 70 regencies/cities.*

2. *From the regions representing sectoral economic centers, this research proportionally selected the regions that can represent different Indonesian regions, namely Western part of Indonesia, Central part of Indonesia, and Eastern part of Indonesia, Java-Bali and outside of Java and Bali;*
3. *Afterward, the regions that can represent urban (city) and rural (regency) areas were proportionally chosen. (See appendix 2.4. List of 20 Regions chosen for Field Research)*

## B. RESEARCH DATA

### B.1. Types of Data

*Data used in this research are a combination of qualitative and quantitative primary data obtained from survey and field research, and secondary data in the form of existing statistical data.*

#### 1. Primary Data

- *Data on the magnitude of factors, variables and indicators determining investment attractiveness based on business communities' perception.*
- *Data on business community's perception related to investment attractiveness of a region.*

2. **Secondary Data** *in the form of existing statistical data collected from previous research and reports provided by the government, including, among others, regional regulation, Economic Data, Manpower, Infrastructure Demography etc.*

(*See Appendix 3. List of Data and Types of Data*)

### B.2. Data Collection

- (1) *Data on the value of each factor, variable and indicator are collected through interview (face-to-face interview) with the help of The Analytic Hierarchy Process (AHP) with 2 to 3 local business respondents in each research area for 20 research areas, and 7 national businessmen along with 3 economists from Jakarta.*
- (2) *The data on the perception of business community regarding regional investment attractiveness were collected through survey using questionnaire (structured question list) distributed through mail to 10 respondents*

daerah penelitian dan dengan *face to face interviews* kepada minimal 20 responden di 20 daerah penelitian lapangan. Dengan menggunakan kuesioner yang dirumuskan secara terstruktur, sistematis serta pemilihan responden yang representatif memungkinkan data yang diisi dalam kuesioner merupakan suatu data yang telah mempunyai nilai obyektivitas yang tinggi sesuai dengan pengetahuan / pengertian / kepercayaan individu tentang obyek sikap (*kognitif*) karena pengalaman, lamanya seseorang mengalami aktivitas (bekerja) atau menghadapi persoalan yang diteliti. Penentuan responden didasarkan pada kriteria sebagai berikut :

- Kalangan dunia usaha yang mewakili perusahaan yang bergerak di bidang, Perkebunan, Kehutanan, Peternakan, Perikanan, Pertambangan, Industri Pengolahan (Manufaktur), dan Perdagangan (tergantung dari keterwakilan karakteristik masing-masing daerah),
  - Mewakili perusahaan skala kecil, sedang, dan besar, berdasarkan modal usaha.
  - Perusahaan yang berasal dari daerah yang bersangkutan (investor daerah setempat), dan
  - Perusahaan yang berasal dari luar daerah (cabang perusahaan, investor dari luar daerah, PMA, dllb);
- (3) Pengumpulan data daya tarik investasi daerah juga dilakukan dengan *In dept interview* (wawancara mendalam) menggunakan pedoman wawancara kepada sejumlah nara sumber yang paham akan berbagai situasi yang berhubungan dengan iklim usaha / investasi di 20 daerah penelitian lapangan, diantaranya : dari kalangan pengusaha dan pemerintah daerah, baik eksekutif maupun legislatif. *In dept interview* ini dilakukan untuk memperoleh gambaran lebih jelas lagi mengenai gambaran daya tarik daerah terhadap investasi serta pole-pole khusus daya tarik investasi daerah, selain itu juga untuk melihat kebijakan-kebijakan yang dibuat oleh pemerintah daerah yang berkaitan dengan investasi dan dunia usaha. Di setiap daerah penelitian lapangan paling tidak dilakukan interview ke 5 nara sumber, sehingga jumlah narasumber yang diwawancarai mendalam sebanyak 112 orang berasal dari 20 daerah. Pemilihan narasumber yang telah diwawancarai didasarkan kriteria berikut :
- Seseorang yang mengetahui dengan baik, dan menyaksikan kejadian-kejadian yang berhubungan dengan aktivitas dunia usaha

*in 114 research areas and face-to-face interview to at least 20 respondents in 20 field research areas. With the use of said structured and systematically designed questionnaire, and the selection of respondents based on strong representativeness consideration, it is likely that data gathered through the questionnaire are highly objective in terms of knowledge, comprehension and reliance of individual respondent. This research makes it sure that the respondents are knowledgeable in their area due to their individual experience. The following criteria are the bases in the selection of respondents:*

- *Businessmen representing companies operating in the field of Plantation, Forestry, Animal Husbandry, Fishery, Mining, Manufacturing and Trading (depending on the representativeness of the characteristics of respective region),*
  - *Representing small, medium and big-scale corporation in terms of business capital,*
  - *Local companies (local investor), and*
  - *Companies from other regions (branch, investor from outside the region, foreign investor, etc.);*
- (3) *Data on regional investment attractiveness were also collected through in-dept interview using interview guide with the interviewees knowledgeable on the business climate/investment in the 20 field research areas, including, among others, businessmen and regional government officials either executive or legislative. In-depth interview was conducted to get a clearer picture about the special patterns of regional investment attractiveness and to know the policies of the local government on business community and investment. In every research area there are at least 5 respondents interviewed, so from 20 regions there were 112 people subjected to in-depth interview. The interviewees were selected based on the following criteria:*
- *Knowledgeable and have experience in dealing with business issues related to investment in the research area.*

/ investasi di daerah penelitian.

- Terlibat secara mendalam dengan kegiatan usaha, kebijakan-kebijakan pemerintah daerah yang berhubungan dengan dunia usaha dan investasi di daerah penelitian.
- *Non-analitis*. Orang yang tidak analitis namun mengetahui dengan baik situasi daerahnya tanpa berpretensi menganalisis suatu kejadian-kejadian tersebut.

(4) Pengumpulan data yang berupa *existing statistic* (data sekunder), dengan mengumpulkan data-data statistik daerah yang berasal dari berbagai laporan yang diberikan oleh lembaga pemerintah (seperti BPS, BI, Depdagri, Pemda, dll), serta berbagai laporan penelitian sebelumnya.

- *Extensive involvement in business activities, local government policies related to business community and investment in the research area.*
- *Non-analytical, in the sense that said respondent is knowledgeable about the situation in his/her region but has no pretension to analyze the situation.*

(4) *Data on existing statistical data (secondary data) were taken from regional statistical reports from different government institution such as Central Bureau of Statistics (BPS), Bank Indonesia, Ministry of Home Affairs, Local Government etc.), and from other previous research report.*

### B.3. Pengolahan Data dan Analisis Data

#### B.3.1. Data untuk Pemingkatan.

##### B.3.1.1. Pembobotan Faktor, Variabel, dan Indikator

Penentuan bobot faktor, variabel, dan indikator yang telah ditentukan untuk pemingkatan daya tarik investasi Kabupaten / Kota dilakukan dengan metode AHP (*The Analytical Hierarchy Process*) dengan bantuan perangkat lunak yang disebut '*Expert Choice*'. AHP merupakan salah satu model untuk pengambilan keputusan yang dapat membantu kerangka berpikir manusia. Peralatan utama dari model ini adalah sebuah hirarkhi fungsional dengan input utamanya persepsi manusia. Pada dasarnya AHP adalah metode yang memecah suatu masalah yang kompleks dan tidak terstruktur ke dalam kelompok-kelompoknya, mengatur kelompok-kelompok tersebut ke dalam suatu hirarkhi; memasukkan nilai numerik sebagai pengganti persepsi manusia dalam melakukan perbandingan relatif dan akhirnya dengan suatu sintesa ditentukan elemen mana yang mempunyai prioritas tertinggi. Atau dengan kata lain, prinsip metode AHP adalah memberikan bobot tiap faktor, variabel, dan indikator dengan perbandingan antar faktor, variabel, indikator satu dengan lainnya. Bobot yang lebih besar dari suatu indikator, menunjukkan indikator yang lebih penting dibandingkan indikator lainnya dalam menentukan daya tarik investasi suatu daerah.

Pembobotan dengan model AHP untuk faktor, variabel, dan indikator ditentukan melalui dua tahap, yaitu :

- Pertama pembobotan terhadap faktor, variabel dan indikator, pemingkatan oleh 34 orang responden pengusaha daerah yang berasal dari 20 daerah penelitian lapangan dengan menggunakan kuesioner AHP. Hasil pembobotan 34 responden ini diolah

### B.3. Data Processing and Analysis

#### B.3.1. Data for Ranking

##### B.3.1.1. Weighing of Factors, Variables and Indicators

*The weight of factors, variables and indicators used in ranking the investment attractiveness of Regency/City were determined through AHP (The Analytical Hierarchy Process) with the help of a software program called 'Expert Choice'. AHP is an instrument that aides people in making decision. The main tool of this instrument is a functional hierarchy with human perception as its main input. Basically, AHP is a method used to simplify a complex and unstructured problem, dividing said problem into smaller organized groups of problems and arranging the groups in a hierarchy, assigning a numeric value as substitute for human perception for the purpose of relative comparison, and finally through a synthetical process the highest priority can be determined. Or in other word, the underlying principle in AHP is giving a weight to every factor, variable and indicator in comparison with other factors, variables and indicators. The higher the weight of an indicator the more important it is compared to other indicator in determining investment attractiveness of a region.*

*Through AHP model, the weight of factors, variables and indicators was determined following these two stages:*

- *34 regional respondents (businessmen) from 20 regional field research areas were asked to rank the factor, variable and indicator using AHP questionnaire. The result of this weighing is then processed with geometrical average to*



dengan rata-rata geometris sehingga menghasilkan suatu 'bobot pengusaha daerah'. Selain dilakukan oleh para pelaku usaha di daerah, pembobotan terhadap faktor, variabel, dan indikator pemeringkatan juga dilakukan oleh 7 orang pengusaha nasional dan 3 orang pengamat ekonomi. Hasil pembobotan oleh para pengusaha nasional dan pengamat ekonomi tersebut juga diolah dengan rata-rata geometris sehingga menghasilkan 'bobot pengusaha nasional dan pengamat ekonomi'.

- Tahap selanjutnya adalah dilakukan rata-rata geometris atas 'bobot pengusaha daerah' dan 'bobot pengusaha nasional dan pengamat ekonomi' untuk menghasilkan bobot akhir faktor, variabel, dan indikator pemeringkatan.

*(Lampiran 4.3. Hasil pembobotan faktor, variabel, dan indikator pemeringkatan)*

#### B.3.1.2. Klasifikasi Intensitas Tiap Indikator

Sebelum diolah dengan 'expert choice', setiap indikator baik yang berasal dari data primer maupun sekunder diklasifikasikan untuk memperoleh intensitas masing-masing. Data-data primer yang diperoleh dari kuesioner persepsi responden (dari 20 daerah penelitian lapangan, dan kuesioner yang disebarkan ke 114 daerah pemeringkatan lainnya) diolah dengan bantuan SPSS atau Exel sehingga diperoleh ditabulasi yang menunjukkan intensitas tiap-tiap indikator pemeringkatan berdasarkan. Intensitas tersebut berupa skala likert 1 sampai dengan 5 yang menunjukkan ukuran dari kondisi yang paling buruk sampai kondisi yang paling baik. Indikator-indikator kuantitatif berupa data sekunder (*existing statistik data*), masing masing juga diklasifikasikan dengan menggunakan 'metode rata rata' dan 'metode distribusi' sehingga diperoleh intensitasnya ke dalam skala likert yang sama. (*lihat Lampiran 4.1*)

Daftar intensitas indikator-indikator yang berasal hasil olahan data primer berupa persepsi dunia usaha daerah tersebut di atas, dijadikan bahan masukan bagi para pengusaha nasional dan pengamat ekonomi dalam forum panel judgement untuk memperoleh intensitas akhir setiap indikator. Keputusan akhir atas intensitas setiap indikator dari panelis inilah yang selanjutnya akan diolah dengan menggunakan perangkat lunak 'expert choice' untuk mendapatkan nilai intensitas tiap indikator dan peringkat daya tarik investasi daerah.

#### B.3.1.3. Penentuan Nilai Intensitas Tiap Indikator dan Peringkat

Intensitas masing masing indikator kemudian dimasukkan ke dalam data base perangkat lunak 'expert

*produce a "local businessmen weight". In addition to the above respondents, the 7 national businessmen and 3 economic analysts were requested to rank the factor, variable and indicator. Result of weighing done by national businessmen and economic analysts was further processed through geometrical average producing a "national businessman and economic analyst weight"*

- *The next step done is calculating the geometrical average for the "local businessmen weight" and "national businessmen and economic analyst weight" to produce final weight of factors, variables and indicators for ranking purpose.*

*(See appendix 4.3. Result of weighing of factors, variables and indicators used in Ranking)*

#### B. 3. 1. 2. Classification of Intensity for Each Indicator

*Before an indicator is processed with 'Expert Choice', every indicator either from primary or secondary data was classified to determine its intensity. Primary data collected through the questionnaire for respondents' perception (from 20 field research areas, and questionnaire distributed to 114 other regions) were then processed using SPSS or Exel for tabulation showing the intensity of each indicator. The intensity was determined using the likert scale of 1-5, one as the worst condition and five as the best condition. The quantitative indicator in the form of secondary data (existing statistical data) was also classified using "average method" and "distribution method" to get the intensity to be put in the same likert scale. (see Appendix 4.1.)*

*The list of Intensity of Indicators from the result of primary data processing showing the perception of regional businessmen and analysts was used as input for the national businessmen and economic analysts during the panel judgment to obtain the final intensity of every indicator. The final decision on the intensity of each indicator from panelist was then processed using 'Expert Choice' software to get the intensity value of each regional indicator and investment attractiveness rank.*

#### B. 3. 1. 3. Determination of Intensity Value of Each Indicator and Rank

*The intensity of every indicator was then used as input in the database of 'Expert Choice' software*



*choice'* berdasar hirarki dan bobot pemeringkatan yang telah ditentukan sebelumnya. Olahan perangkat lunak tersebut menghasilkan nilai masing masing indikator yang secara kumulatif membentuk urutan peringkat nilai dari yang tertinggi sampai yang terendah diantara 134 daerah pemeringkatan. Terlampir cara perhitungan peringkat berdasar prinsip kalkulasi perangkat lunak *'expert choice'*.

### **B.3.2. Data Gambaran Daya Tarik Invesatasi Daerah Kabupaten/Kota.**

Untuk melihat gambaran daya tarik investasi Kabupaten / Kota dilakukan survai dengan menyebarkan kuesioner ke sejumlah responden dari dunia usaha di 20 Kabupaten / Kota. Untuk pertanyaan tertutup pada kuesioner, menggunakan skala likert antara 1 sampai dengan 5 yang menunjukkan ukuran dari kondisi yang paling buruk sampai kondisi yang paling baik, dipergunakan untuk kuantifikasi persepsi atau sikap yang merupakan satu hal yang bersifat kualitatif. Penelitian yang dilakukan mengenai daya tarik investasi daerah kabupaten kota bersifat deskriptif, dengan melakukan eksplorasi dan klarifikasi mengenai fenomena-fenomena atau kenyataan di lapangan dengan jalan mendeskripsikan sejumlah variabel yang berkenaan dengan daya tarik investasi suatu daerah. Dengan demikian dalam penelitian ini tidak dimaksudkan untuk menarik generalisasi yang menjelaskan variabel-variabel antesenden yang menyebabkan suatu gejala-gejala atau kenyataan tertentu yang berkaitan dengan daya tarik investasi suatu daerah. Dengan kata lain untuk penelitian gambaran daya tarik investasi daerah Kabupaten/Kota tidak dilakukan pengujian hipotesa. Dalam pengolahan dan analisis data, menggunakan pengolahan data statistik yang bersifat deskriptif (statistik deskriptif). Analisis hasil temuan lapangan mengenai situasi dan kondisi yang mempengaruhi daya tarik daerah terhadap investasi dibuat secara deskriptif, didukung pula dengan hasil temuan lapangan berdasarkan wawancara mendalam. Selain didukung oleh wawancara mendalam untuk mempertegas dan memperjelas analisis didukung pula dengan data-data kuantitatif statistik daerah, seperti : Data Kependudukan, Susenas, PDRB, Perda, APBD dan sebagainya. Karena data-data kuantitatif / statistik tersebut merupakan data pendukung dan merupakan salah satu rujukan, berarti data-data kuantitatif tersebut tidak ditolak atau menolak data kualitatif, melainkan ditempatkan sebagai salah satu rujukan dalam rangka memahami atau memperoleh pengertian yang mendalam dan komprehensif mengenai permasalahan yang diteliti atau dianalisis.

*following the previous hierarchy and ranking value. The processing of the software results in the value of each indicator, cumulatively forming the hierarchy of value from the highest to the lowest for 134 ranking areas. Enclosed is the procedure in calculation of the rank based on calculation principles in 'Expert Choice' software.*

### **B.3. 2. Descriptive Data on Regency/ City Investment Attractiveness.**

*To assess the attractiveness of Regency/ City, a survey was conducted with the use of questionnaire to a number of respondents from business communities in 20 regencies/cities. Likert scale from 1 to 5 was used in closed questionnaire showing the least to most conducive climate to see the level of perception and attitude, which are actually somehow qualitative. This research on the regency/city investment attractiveness is indeed descriptive in nature, carried out through exploration and clarification on phenomena and real situation in the research area by making a description of a number of variables related to the investment attractiveness of an area. So this research is not intended to draw a generalization that can explain antecedent variables causing certain reality or indication related to investment attractiveness of a region. In other word, this descriptive research on the investment attractiveness of a regency/ city was not done using hypothetical testing. Processing and analysis of statistical data are merely descriptive in this research. Analysis on the finding of field research about the situation and condition in the area that influence investment attractiveness is also descriptive in nature, supported by the findings in the field through in-depth interview. In addition to the result of the in-depth interview, there are also data on demographic picture, data from National Census Survey (Susenas), data on PDRB, Regional Regulation, and APBD that were used to support the analysis. Because the mentioned data are supporting data and serve as reference, it means that the above data cannot be rejected by nor reject qualitative data, but used as reference to understand further the research problems.*

Dari masing-masing gambaran mengenai daya tarik daerah tersebut juga akan diperoleh intensitas masing-masing indikatornya menurut skala likert yang telah ditentukan sebelumnya. Data-data persepsi yang sudah dikuantifikasi tersebut diolah untuk mendapatkan pemeringkatan daya tarik investasi 134 daerah Kabupaten / Kota di Indonesia.

*From each description of the regional attractiveness, this research has obtained the intensity of every indicator based on the likert scale previously explained. The data on perception that were already quantified were then processed to obtain the level of investment attractiveness of 134 regencies and cities in Indonesia.*

# IV. PEMAPARAN HASIL PENELITIAN

## *Description of Survey Result*

### A. FAKTOR-FAKTOR DOMINAN YANG MENENTUKAN DAYA TARIK DAERAH TERHADAP INVESTASI BERDASARKAN PERSEPSI DUNIA USAHA

Dalam penelitian ini, ada 5 (lima) faktor yang digunakan untuk menilai daya tarik investasi suatu daerah, yang terperinci dalam 14 variabel, dan 42 indikator (*Diagram 1.*). Kelima faktor yang digunakan dalam penelitian ini yaitu; Faktor Kelembagaan; Faktor Sosial Politik; Faktor Perekonomian Daerah; Faktor Ketenagakerjaan dan Produktivitas; dan Faktor Infrastruktur Fisik. Berdasarkan studi literatur dan pendapat para pakar dan pelaku usaha kelima faktor tersebut merupakan faktor-faktor yang mempengaruhi daya tarik suatu daerah terhadap investasi. Faktor-faktor yang mempengaruhi daya tarik investasi suatu daerah tersebut, dapat dikelompokkan menjadi dua, yakni faktor-faktor yang tergabung dalam *policy variable* (kelembagaan, sosial politik) dan faktor-faktor yang tergabung dalam *endowment variable* (perekonomian daerah, ketenagakerjaan, dan infrastruktur). Yang dimaksud dengan *policy variable* di sini adalah faktor-faktor yang dapat dengan cepat dipengaruhi oleh kebijakan yang dibuat oleh pemerintah. Sementara *endowment variable* maksudnya adalah faktor-faktor yang merupakan anugerah yang dimiliki oleh daerah dan tidak dapat dengan segera dapat dirubah melalui kebijakan yang dibuat pemerintah. (*lihat Diagram 2*)

### A. PRIMARY FACTORS THAT DETERMINE THE ATTRACTIVENESS OF REGION TO INVESTMENT FROM THE PERCEPTION OF BUSINESS COMMUNITY

*In this research, there are five (5) factors used to evaluate the attractiveness of region to investment that were segregated into 14 (fourteen) variables and 42 indicators (Diagram 1.). The five primary factors used in this research are as follows: Institution, Socio-political and Cultural Condition, Regional Economy, Labor and Productivity, and Physical Infrastructure. Based on a study of literature and opinion of experts and employers, those five factors can influence the attractiveness of a region to investment. The influencing factors on the attractiveness of a region to investment can be classified into two types, namely the factors on policy variables (such as institution and socio-political condition) and the factors on endowment variables (such as regional economy, labor and productivity, and physical infrastructure). Policy variables refer to the factors that can be directly influenced by government's policy. While endowment variables refer to the factors that naturally set for a district or region and thus, cannot be directly changed through a government's policy (see Diagram 2).*

**Diagram 2.**  
Bobot Faktor Pemeringkat / Weight of Rating Factors

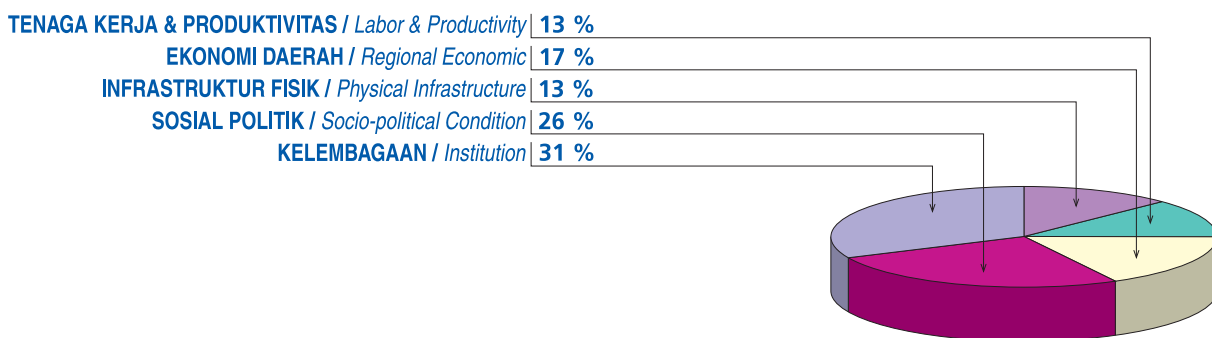

Dengan menggunakan metode AHP yang diolah dengan program *expert choice*, berdasarkan persepsi para pelaku usaha dan para pengamat ekonomi, faktor-faktor yang dianggap penting dalam menentukan daya tarik investasi suatu daerah secara berurutan adalah; pertama Faktor Kelembagaan dengan bobot sebesar 31%, diikuti oleh Faktor Sosial Politik (termasuk di dalamnya keamanan dan budaya) sebesar 26%, Faktor Ekonomi Daerah sebesar 17%, dan terakhir Faktor Tenaga Kerja & Produktivitas, serta Faktor Infrastruktur Fisik masing-masing dengan bobot yang sama yaitu 13%. (Diagram 2.)

Dari pembobotan tersebut terlihat bahwa ternyata faktor-faktor yang tergabung dalam *policy variable* masih ditempatkan lebih penting daripada faktor-faktor yang tergabung dalam *endowment variable*. Hal ini menunjukkan bahwa daya tarik investasi daerah-daerah di Indonesia masih berada dalam kondisi yang belum normal atau belum ideal. Dalam keadaan normal, untuk menentukan faktor-faktor yang menjadi pertimbangan keputusan berinvestasi semestinya bobot lebih besar diberikan pada faktor potensi ekonomi, infrastruktur, dan ketenagakerjaan (*endowment variable*). Selanjutnya, hasil pembobotan tiap-tiap indikator setiap faktor peringkatan diperlihatkan dalam diagram-diagram berikut ini.

**A.1. Bobot Indikator Faktor Kelembagaan**

Diagram 3. memperlihatkan pembobotan setiap indikator dalam Faktor Kelembagaan. Indikator-indikator dalam faktor kelembagaan tersebut dapat dikelompokkan menjadi 4 Variabel, yaitu: Variabel Aparatur dan Pelayanan, Variabel Kepastian Hukum, Variabel Keuangan Daerah, dan Variabel Peraturan Daerah. Dari keempat variabel tersebut variabel kepastian hukum mendapatkan bobot terbesar yaitu 39%, diikuti variabel perda 25%, variabel, aparatur dan

*By using the AHP method which are then processed using the Expert Choice program, based on the perception of employers and economic analysts, the important factors in determining the attractiveness of district or region to investment are the following: the top most important factor is the Institution (31%) followed by Socio-political Factor (including security and cultural factor) at 26%, Regional Economy at 17% with Labor and Productivity and Physical Infrastructure as the last factors with the same value at 13% (See Diagram 2).*

*From the weight above, it shows that the factors under the policy variable are still more important than the factors in endowment variable. It indicates that the attractiveness of regions in Indonesia to investment is still not in ideal or normal condition. In a normal condition, consideration in investment decision is usually directed more to the factors of economic potential, infrastructure and manpower (endowment variables). The result of weighing on each indicator for each factor is shown in these following diagrams.*

**A.1. Weight of the Indicators of Institutional Factor**

*Diagram 3 shows the weight given on each indicator under Institutional Factor. The indicators under the institutional factor are classified into four (4) variables, namely: Apparatus and Service, Law Certainty, Regional Finance, and Regional Policy/Regulation. Among said four factors, the variable of Law Certainty has obtained the highest weight at 39% followed by Variable of Regional Policy/Regulation (25%),*

**Diagram 3.**  
Bobot Faktor Kelembagaan / Weight of the Indicators of Institutional Factor

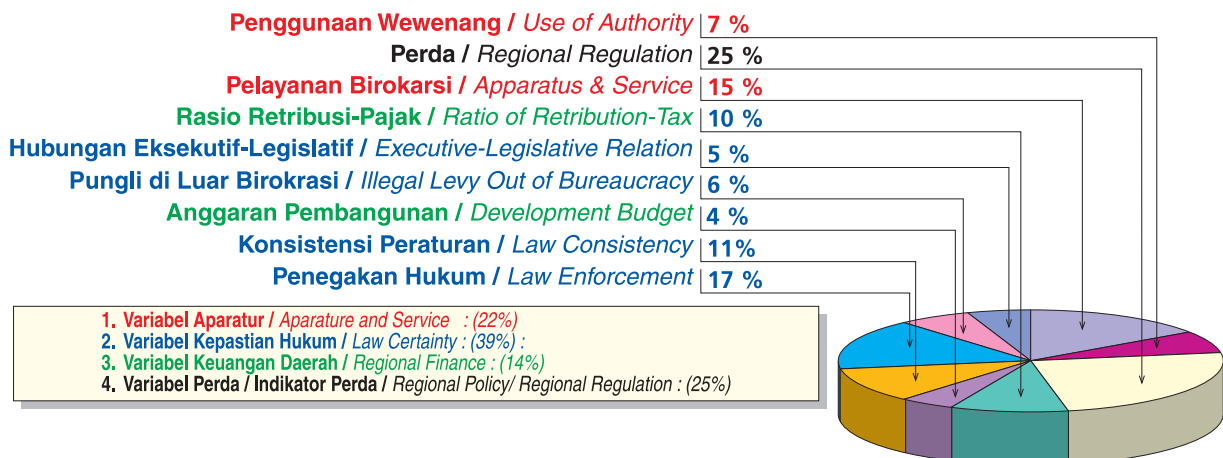



pelayanan sebesar 22%, dan yang terakhir variabel keuangan daerah sebesar 14%.

Bila ditelusuri lebih jauh dengan melihat bobot tiap-tiap indikator dalam faktor kelembagaan ini, terlihat bahwa indikator perda mendapat bobot terbesar yaitu 25%, diikuti oleh indikator penegakan hukum sebesar 17%, pelayanan oleh birokrasi 15%, konsistensi peraturan 11%, rasio retribusi terhadap pajak dalam APBD sebesar 10%. Bila diperhatikan ternyata indikator-indikator yang mendapat bobot di atas 10% tersebut (Perda, penegakan hukum, pelayanan birokrasi, konsistensi peraturan, dan rasio retribusi terhadap pajak) berkaitan langsung dengan hal-hal yang diatur secara formal dalam berbagai kebijakan oleh pemerintah daerah. Dari situ kita bisa mengatakan bahwa berkaitan dengan faktor kelembagaan, ternyata para pelaku usaha saat ini sangat memperhatikan berbagai kebijakan yang dibuat oleh pemerintah daerah dalam berbagai aturan formal yang ada di daerah. Sementara untuk keempat indikator lainnya (pungli diluar birokrasi dan penggunaan wewenang oleh aparat, anggaran pembangunan, hubungan eksekutif - legislatif) mendapat bobot kurang dari 10%. Terlihat bahwa khusus untuk indikator-indikator yang bersifat informal (pungli diluar birokrasi dan penyalahgunaan wewenang oleh aparat pemda) porsi bobotnya lebih kecil dibandingkan dengan indikator-indikator yang bersifat formal. Hal ini dapat diinterpretasikan karena dalam pandangan para pelaku usaha, kendala-kendala dari hal-hal yang bersifat informal tersebut dapat teratasi atau berkurang dengan aturan formal yang baik dan penegakan hukum yang baik pula. Atau bisa juga karena hal-hal yang bersifat informal tersebut menurut para pelaku usaha dapat mereka selesaikan sendiri dengan jalur informal pula.

#### A.2. Bobot Faktor Sosial Politik

Diagram 4. memperlihatkan pembobotan setiap indikator dalam Faktor Sosial Politik. Indikator-indikator dalam faktor sosial politik dapat dikelompokkan kedalam tiga variabel, yaitu: Variabel Keamanan, variabel Sosial Politik, dan variabel Budaya. Untuk faktor Sosial Politik ternyata variabel Keamanan mendapat bobot tertinggi yaitu sebesar 60%, kemudian diikuti oleh variabel Sosial Politik dengan bobot sebesar 27%, sementara variabel Budaya mendapat bobot terkecil yakni 8%. Dari besarnya bobot variabel keamanan yang diberikan oleh para pelaku usaha di daerah menunjukkan bahwa hingga saat ini kondisi keamanan di sejumlah daerah di Indonesia dipandang perlu untuk mendapat perhatian yang serius karena sangat signifikan mempengaruhi

*Apparatus and Service (22%) and lastly Regional Finance at 14% (see Diagram 3).*

*If we evaluate more comprehensively by looking at each indicator under the institutional factor, it shows that regional regulation indicator has the highest weight at 25% followed by law enforcement indicator at 17%, government service (15%), consistency of regulation (11%), and ratio of retribution over tax in APBD (10%). We can notice here that the indicators that obtain weight above 10% (Regional Regulation, law enforcement, government service, consistency of regulation and ratio of retribution over tax) are directly related with items regulated formally in some policies made by regional government. At this point, we can state that in line with institutional factor, businessmen today are really concerned about some policies made by regional government through several formal regulations in the region. While the other four factors (illegal levy and the abuse of authority by government officials, budget for development, relationship between executive and legislative branches) have obtained weight of less than 10%. It is evident that informal indicators (illegal levy and the abuse of authority by government official) have smaller proportion in terms of weight compared to formal indicators. It is because business community assumes that those informal constraints can be handled or lessened if good formal regulation has been in placed and therefore law enforcement may still be relied upon. Or it is possible also that business community thinks that it can solve those informal problems through certain informal ways.*

#### A.2. Weight of the Indicators of Socio-Political Factor

*Diagram 4 indicates the weight of each indicator under Socio-political Factor. The indicators under the socio-political factor are categorized into three variables, namely security, socio-political condition, and cultural condition. Under the socio-political factor, it shows that variable of security has obtained the highest weight at 60% and followed by socio-political factor with 27%; while variable of culture has the smallest weight at 8%. From the weight of variable of security given by business community in certain regions, it shows that security condition in some areas in Indonesia must be given serious attention because it can significantly influence investor's decision to invest its capitals in a region in Indonesia.*

**Diagram 4.**

**Bobot Faktor Sosial Politik / Weight of the Indicators of Socio-Political Factor**

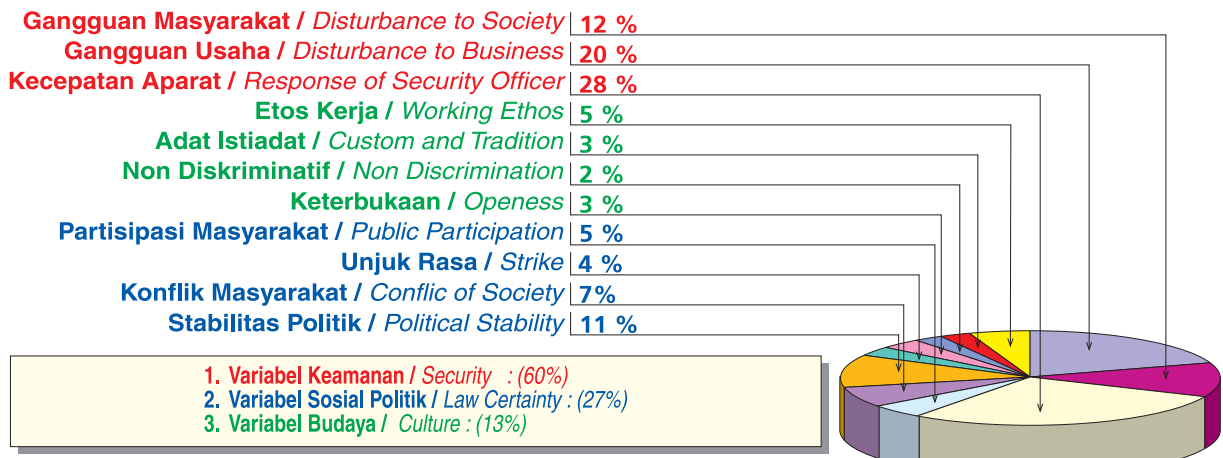

keputusan investor untuk menanamkan modalnya di suatu daerah.

Dari variabel keamanan yang mendapat bobot terbesar (60%) seperti di atas ternyata jika ditelusuri ke dalam indikator-indikator pembentuknya, indikator kecepatan aparat keamanan dalam menangani gangguan keamanan di daerah mendapat perhatian besar yakni dengan bobot tertinggi sebesar 28%, diikuti oleh indikator gangguan keamanan terhadap kegiatan usaha sebesar 20% dan gangguan keamanan di lingkungan masyarakat sebesar 12%. Di luar variabel keamanan indikator yang cukup mendapat perhatian lebih dari para pelaku usaha adalah indikator stabilitas politik dengan bobot 11%, diikuti indikator konflik sosial dalam masyarakat dengan bobot 7%, dimana kedua indikator tersebut merupakan bagian dari variabel sosial politik.

*From the variable of security that obtained the highest weight (60%) as mentioned above, the indicator of quick response of security officers in handling security problems in a region needs serious attention, as it obtained the highest value (28%) followed by the indicator of business security (20%) and community security (12%). Beyond the variable of security, the indicator that attracts enough attention from the business community is political stability (11%) followed by social conflict indicator (7%) wherein both indicators are integral part of socio-political factor.*

**A.3. Bobot Faktor Ekonomi Daerah**

Faktor Perekonomian daerah merupakan Endowment Variabel, yaitu faktor yang perubahannya tidak dapat dengan segera terjadi dengan kebijakan-kebijakan yang dibuat oleh pemerintah daerah. Indikator-indikator dalam faktor perekonomian daerah ini lebih banyak merupakan “anugerah” yang diterima secara alamiah oleh daerah yang bersangkutan seperti sumber daya alam misalnya. Indikator-indikator dalam faktor perekonomian daerah ini dapat dikelompokkan menjadi dua variabel utama yaitu : variabel potensi ekonomi dan variabel struktur ekonomi. Dari hasil pembobotan yang dilakukan oleh para pelaku usaha, ternyata variabel potensi ekonomi mendapat bobot lebih besar dari pada variabel struktur ekonomi yaitu sebesar 71%, sementara variabel struktur ekonomi hanya sebesar 29%. Dengan demikian dapat dikatakan bahwa dalam melakukan investasi para pelaku usaha lebih banyak menekankan pada potensi ekonomi dari daerah yang akan dituju sebagai tempat melakukan kegiatan usaha dibandingkan dengan struktur ekonomi yang sudah

**A.3. Weight of the Indicators of Regional Economy Factor**

*Regional economy factor is one of the Endowment Variables; that is, a factor that cannot be changed immediately through certain policies made by regional government. Indicators under the regional economy factor seems more like a “blessing” accepted naturally by relevant region, for example natural resources. Indicators under the regional economy factor are categorized into two (2) main variables, namely variable of economic potential and economic structure. From the weight given by business community, the variable of economic potential got a higher weight (71%) compared to variable of economic structure getting only 29%. Thus, it can be said that in investment, businessman emphasizes more on economic potential of the destination area as a place to do business than to the economic structure present in that area. (See Diagram 5)*

**Diagram 5.**

**Bobot Faktor Ekonomi Daerah / Weight of the Indicators of Economy Factor**

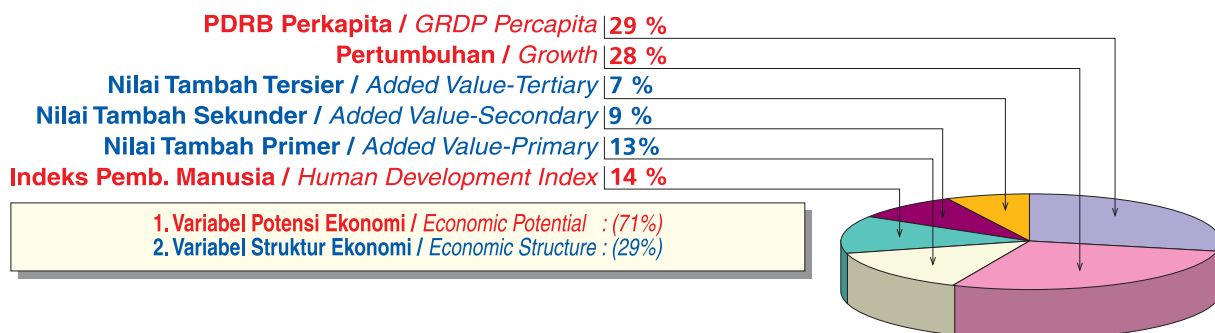

berkembang di daerah tersebut.

Jika dilihat dari bobot masing-masing indikator dalam faktor perekonomian daerah terlihat pula bahwa indikator-indikator yang termasuk dalam variabel potensi ekonomi semuanya mendapat bobot lebih besar dibandingkan indikator-indikator yang termasuk dalam variabel struktur ekonomi. Indikator PDRB Perkapita yang merupakan ukuran daya beli masyarakat mendapat bobot terbesar yakni sebesar 29%, diikuti oleh indikator pertumbuhan ekonomi sebesar 28%, dan IPM 14%. Indikator-indikator tersebut dapat dijadikan ukuran untuk melihat prospek pertumbuhan dari usaha yang akan mereka lakukan di daerah tujuan investasi. Sementara indikator-indikator yang tergabung dalam struktur ekonomi (nilai tambah sektor primer, sekunder dan tersier) mendapat bobot lebih kecil karena oleh para pelaku usaha lebih ditempatkan untuk melihat kegiatan ekonomi apa yang telah berkembang atau dikembangkan di daerah yang bersangkutan sebagai pendukung kegiatan usaha yang akan mereka lakukan. Dari sini kita dapat ketahui bahwa dalam menentukan lokasi usaha, para pelaku usaha terlebih dahulu melihat potensi ekonomi suatu daerah, setelah itu baru kemudian melihat sektor usaha apa yang telah berkembang atau yang dapat mendukung kegiatan usaha mereka.

*From the weight of each indicator under regional economy, it shows that the indicators under the variable of economic potential have bigger weight compared to the indicators under the variable of economic structure. The indicator of PDRB per capita as an indicator of society's purchasing power got the highest weight (29%) followed by the indicator of economic growth (28%) and IPM (14%). Those indicators can be used as a gauge to see the prospect of growth from business activities in a target area for investment. While the indicators under the economic structure (weight-added of primary, secondary and tertiary sectors) have smaller weight because the business community assumes them as simply a picture of economic activities that have been performed and developed in relevant areas that may be exploited as supporting unit for its planned business activities in that area. From this point, we know that in determining a business area, the businessman has to see first the potential for economic growth of an area or district. Afterward, he/she has to see the kinds of businesses that have been developed or can support his/her business activities.*

#### **A.4. Bobot Faktor Tenaga Kerja dan Produktivitas**

Faktor yang juga penting dalam kegiatan usaha adalah Ketenagakerjaan dan Produktivitas Tenaga Kerja. Faktor ketenagakerjaan terdiri dari tiga variabel, yakni Variabel Ketersediaan Tenaga Kerja, Variabel Biaya Tenaga Kerja dan Variabel Produktivitas Tenaga Kerja. Dari ketiga variabel dalam faktor ketenagakerjaan dan produktivitas ini, variabel produktivitas tenaga kerja mendapat bobot terbesar yakni 41%, kemudian disusul oleh variabel ketersediaan tenaga kerja sebesar 35%, dan terakhir variabel biaya tenaga kerja sebesar 24%. Tampak bahwa variabel produktivitas tenaga kerja mendapat perhatian paling besar dibandingkan dua variabel yang

#### **A.4. Weight of the Indicators of Labor and Productivity Factor**

*Another important factor in business activity is labor and its productivity. The labor factor consists of three (3) variables, namely Manpower Availability, Labor Cost and Labor Productivity. From these three (3) variables under Labor and Productivity, the variable of labor productivity got the highest weight (41%) followed by variable of labor availability (35%) and finally variable of labor cost (24%). It shows that the variable of labor productivity is the highest concern compared to two other variables. It indicates that in choosing a business area, businessman is more interested in*



lain. Hal ini menunjukkan bahwa dalam memilih lokasi usaha, para pelaku usaha lebih tertarik pada daerah-daerah yang dapat menyediakan tenaga kerja dengan kualitas yang baik yaitu dilihat dari produktivitasnya.

Sementara variabel biaya tenaga kerja mendapat bobot yang paling kecil dibandingkan dua variabel yang lain, karena menurut para pelaku usaha biaya tenaga kerja merupakan sesuatu yang memang seharusnya mereka keluarkan sebagai suatu komponen biaya produksi. Dengan upah tenaga kerja yang tinggi tidak terlalu menjadi persoalan besar bagi para pelaku usaha, dengan catatan produktivitas tenaga kerja yang bersangkutan tinggi. Kecilnya bobot yang diberikan para pelaku usaha terhadap indikator biaya tenaga kerja tersebut juga bisa disebabkan karena selama ini kita ketahui bahwa standar upah tenaga kerja di Indonesia relatif lebih murah dibandingkan dengan negara-negara lain. (*lihat Diagram 6.*)

*an area that can provide qualified workers in terms of productivity.*

*Whereas the variable of labor cost got the smallest weight compared to the two other variables because for businessmen labor cost is a cost that they have to expend as a component of production cost. High labor cost may not be a big problem for businessman as long as the labor yields high productivity. A small weight given by the business community to the indicator of labor cost is also caused by the fact that the standard salary of workers in Indonesia is relatively lower than that of other countries. (See Diagram 6)*

**Diagram 6.**

**Bobot Faktor Tenaga Kerja & Produktivitas / Weight of the Indicators of Labor & Productivity Factor**

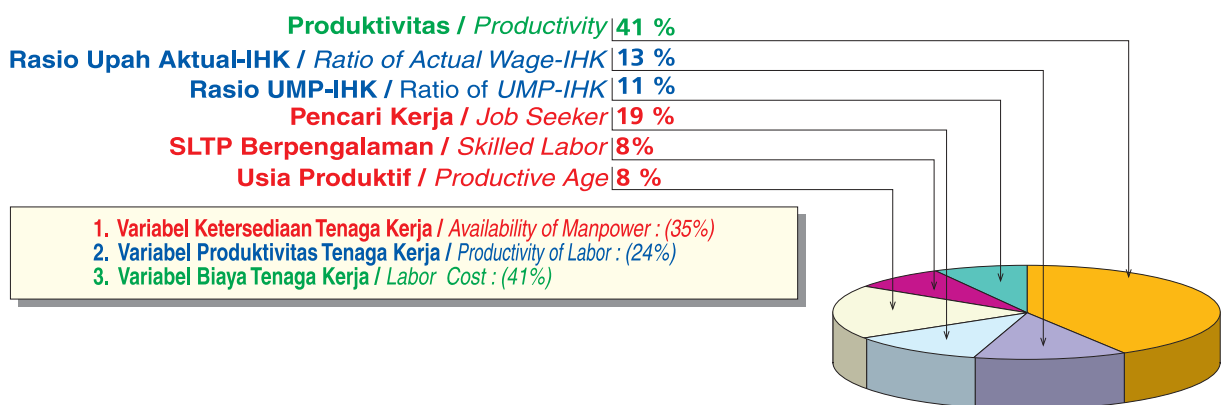

Dari variabel ketersediaan tenaga kerja yang mendapat bobot 35%, jika diuraikan ke dalam tiap-tiap indikator, diketahui bahwa para pelaku usaha cukup menaruh perhatian pada masalah pengangguran. Hal ini terbukti bahwa dari tiga indikator dalam variabel ketersediaan tenaga kerja, ternyata indikator pencari kerja (rasio antara pencari kerja terhadap angkatan kerja) mendapat bobot tertinggi yaitu 19%, dibandingkan dengan dua indikator lainnya (usia produktif dan pekerja berpendidikan SLTP) yang masing-masing hanya mendapat bobot 8% . Dari sini kita bisa ketahui bahwa para pelaku di Indonesia cukup besar menaruh perhatian pada masalah pengangguran. Sementara untuk variabel biaya tenaga kerja para pelaku usaha memberikan bobot yang lebih besar pada upah aktual yang harus mereka bayarkan kepada pekerja (13%) dibandingkan dengan upah pekerja yang diatur secara formal dalam UMP atau UMK.

*In terms of manpower availability that has a 35% weight, the business community is more concerned about unemployment problem. It was proven that from the three indicators under manpower availability variable, the indicator of job seekers (the ratio between job seeker and labor force) got the highest value (19%) compared to two other indicators (productive age and educated labor force of at least junior high school) in which each of them got only 8%. Following said data, we can conclude that businessmen in Indonesia are concerned about unemployment problem. While for the variable of labor cost, the business community gives a higher weight on actual salary, that is the salary it should pay to it workers (13%), compared to the worker's salary regulated formally in UMP or UMK.*



### A.5. Bobot Faktor Infrastruktur Fisik

Faktor Infrastruktur Fisik terdiri dari dua variabel yaitu Variabel Ketersediaan Infrastruktur Fisik dan Variabel Kualitas Infrastruktur Fisik. Tampak bahwa diantara kedua variabel ini mendapat bobot yang cukup seimbang yakni untuk variabel ketersediaan infrastruktur fisik sebesar 54% dan untuk variabel kualitas infrastruktur sebesar 46%. Ketersediaan Infrastruktur fisik yang mendapat bobot lebih besar menunjukkan bahwa dalam melakukan kegiatan usaha ketersediaan infrastruktur lebih dibutuhkan oleh para pelaku usaha. Bobot yang berimbang menunjukkan bahwa disamping ketersediaan infrastruktur ada tuntutan akan kualitas yang baik dari infrastruktur yang ada. Kualitas yang baik ini mempermudah akses dan kelancaran mobilitas dari kegiatan usaha yang dilakukan oleh para pelaku usaha. (lihat Diagram 7.)

### A.5. Weight of the Indicators of Physical Infrastructure

Physical infrastructure factor consists of two (2) variables, namely variable of the availability of physical infrastructure and variable of the quality of physical infrastructure. Variable of the availability of physical infrastructure got 54% and variable of the quality of physical infrastructure at 46%. The higher the weight of availability of physical infrastructure indicates that in performing business activities, the availability of physical infrastructure is more vital for businessman. The proportionally high weight got by the indicator of quality of infrastructure indicates that the demand is not only for the availability of infrastructure, but also for the quality of the available infrastructure. Such quality infrastructure is assumed to facilitate easy access and smooth mobility for any business activities performed by businessman (See Diagram 7.)

**Diagram 7.**

**Bobot Faktor Infrastruktur Fisik / Weight of the Indicators of Physical Infrastructure Factor**

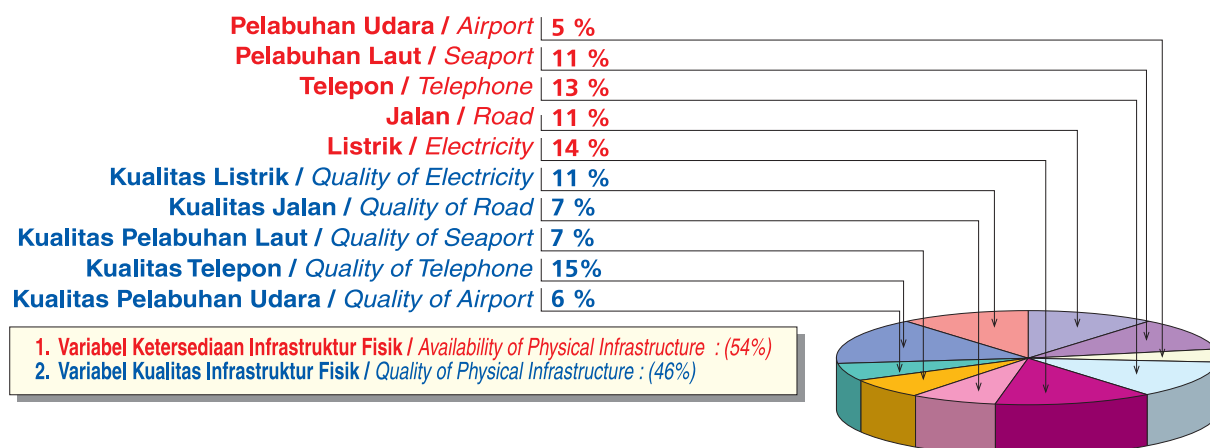

Indikator-indikator dalam faktor infrastruktur fisik terlihat bahwa proporsi tiap indikator mendapat bobot yang hampir berimbang dan merata. Dari 10 indikator dalam faktor infrastruktur, indikator kualitas telpon mendapat bobot tertinggi yakni sebesar 15% dan bobot terkecil adalah indikator kualitas pelabuhan laut yaitu sebesar 6%. Dari sini terlihat bahwa indikator-indikator infrastruktur fisik yang digunakan untuk menilai daya tarik investasi suatu daerah merupakan sarana pendukung yang benar-benar dibutuhkan oleh para pelaku usaha untuk kelancaran usaha mereka.

Hasil pembobotan faktor, variabel, dan indikator yang digunakan untuk menentukan daya tarik investasi daerah di atas menunjukkan prioritas pertimbangan yang dipakai oleh para pelaku usaha untuk menentukan daerah lokasi usaha mereka. Hasil pembobotan tersebut juga dapat digunakan sebagai panduan oleh para pengambil kebijakan di daerah - dalam hal ini pemerintah daerah - untuk menentukan strategi yang

Indicators under physical infrastructure factor indicate that each indicator has a proportional equal weight. From ten indicators under the physical infrastructure factor, the indicator of quality of telephone service got the highest weight at 15% while the lowest weight was given to the indicator of quality of seaport (6%). It seems that all indicators under physical infrastructure are equally important and needed by businessmen in conducting their businesses such that they are important attractiveness indicators.

The result of weighing of factors, variables and indicators used to determine the attractiveness of a region to investment as presented above reveals the primary considerations of businessmen in determining the location of their business. That kind of result can also be used as a reference for decision makers in the region—in this case, the regional governments—to determine a strategy to enhance the attractiveness of their regions to investment.

diambil untuk meningkatkan daya tarik daerahnya terhadap investasi. Dengan melihat kelemahan dan kekuatan daerahnya, pengambil kebijakan di daerah juga dapat menentukan prioritas pembangunan di daerahnya agar menarik bagi investor.

*Taking into consideration the strengths and weaknesses of their districts or regions, the decision-makers in the region may also use this to prioritize development initiatives in their areas in order for their regions to become more interesting for investors.*

## B. HASIL PEMERINGKATAN 134 KABUPATEN/KOTA DI INDONESIA

Hasil pemeringkatan 134 daerah penelitian disajikan berdasarkan urutan peringkat total dan berdasarkan urutan peringkat masing-masing faktor, guna memberikan gambaran lengkap terhadap hasil akhir nilai total, serta untuk mengetahui keunggulan dan kelemahan masing-masing daerah di tiap faktor / kelompok variabel. Dalam laporan penelitian ini juga dilampirkan pemeringkatan berdasarkan kegiatan ekonomi yang dominan di daerah-daerah pemeringkatan, yaitu Daerah Sentra Manufaktur, Perdagangan dan Jasa, Pertambangan, Perkebunan dan Kehutanan, serta daerah Sentra Pertanian Non Pangan. Disamping itu juga dilampirkan hasil pemeringkatan berdasarkan Kabupaten dan Kota. Untuk keperluan pembahasan hasil penelitian hanya akan ditampilkan daerah yang menempati peringkat 10 besar teratas dan 10 terbawah berdasarkan peringkat total, dan per faktor, sedangkan untuk hasil pemeringkatan keseluruhan (134 daerah) disajikan pada bagian lampiran.

## B. RESULT OF RATING TO 134 REGENCIES /CITIES IN INDONESIA

*The result of rating to 134 research areas is presented following the order of rank for all factors and then for each factor to give a complete description of the final result of the total score, as well as to find out the strengths and weaknesses of each region for every factor. As attached, this report also presents the result of rating based on the dominant economic activities in the research areas, namely Manufacture Center Region, Trade and Service Center Region, Mining Center Region, Plantation and Forestry Center Region, and Non-Food Agricultural Center Region. The result of rating according to Regency and City is likewise presented. For the purpose of discussion of research result, this paper only presents the regions that belong to the first ten and the last ten rank based on the over-all rating and rating per factor, whereas the result of the total rating for all regions (134 regions) is presented in the appendix section.*

### B.1. Peringkat Daerah Berdasarkan Nilai Total

Untuk peringkat secara total dari 134 daerah Kabupaten / Kota yang diperingkat hanya ada 126 peringkat karena ada beberapa daerah yang menempati

### B.1. Rating of Regions according to the Overall Score

*Of the total 134 rated regions, this rating produces only 126 ranks since there are several*

**Grafik / Graph 1.**  
Daerah Peringkat 10 Teratas dan Terbawah  
Dalam Daya Tarik Terhadap Investasi Secara Umum /  
*The First and Last Ten Rank Regions According to the Overall Score*

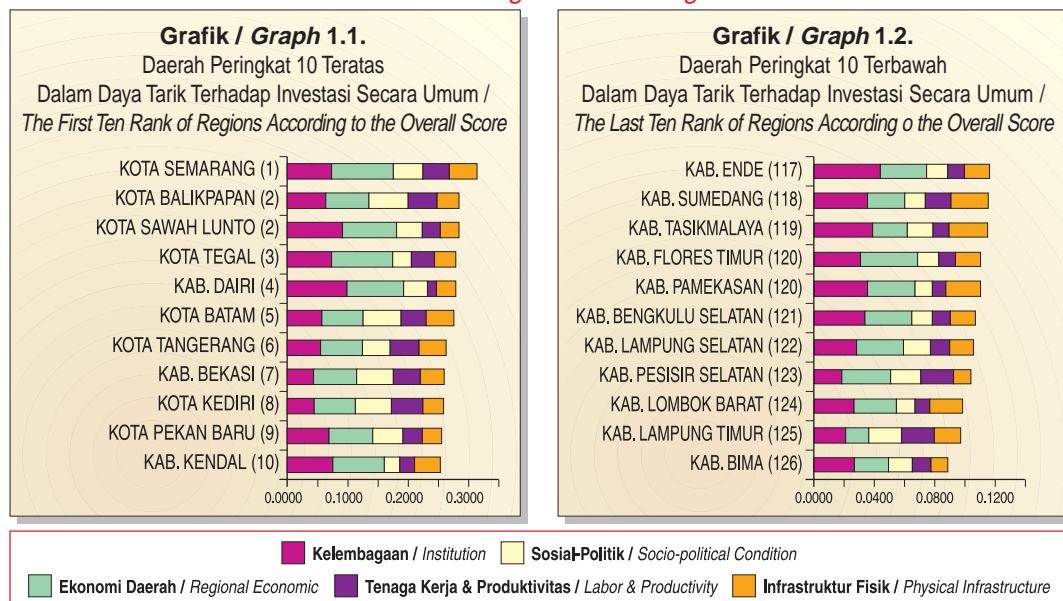

peringkat yang sama. Daerah-daerah yang menduduki peringkat 10 besar teratas dan terbawah dalam daya tariknya terhadap investasi secara umum terlihat dari Grafik 1. di bawah ini (*Peringkat daya tarik investasi 134 Kabupaten / Kota secara keseluruhan dapat dilihat pada Lampiran 1.1*).

Daerah-daerah yang menempati peringkat 10 besar teratas adalah Kota Semarang pada peringkat pertama, disusul Kota Balikpapan dan Kota Sawahlunto di peringkat kedua, dan Kota Tegal di peringkat ketiga. Peringkat empat sampai sepuluh ditempati secara berurutan oleh Kabupaten Dairi, Kota Batam, Kota Tangerang, Kabupaten Bekasi, Kota Kediri, Kota Pekanbaru dan Kabupaten Kendal. Sementara untuk daerah-daerah yang menempati peringkat 10 terbawah adalah, Kab. Ende pada urutan ke 117, dikuti Kab. Sumedang (118), Kab. Tasik Malaya (119), Kab. Pamekasan dan Kab. Flores Timur bersama-sama pada peringkat ke-120, selanjutnya peringkat ke-121 sampai dengan peringkat ke-126 secara berurutan diduduki oleh Kab. Bengkulu Selatan, Kab. Lampung Selatan, Kab. Pesisir Selatan, Kab. Lombok Barat, Kab. Lampung Timur, dan terakhir Kab. Bima di urutan ke 126. Urutan peringkat tersebut dihasilkan dari persepsi pelaku usaha daerah dan data-data sekunder dari 42 (empat puluh dua) indikator yang tercakup dalam 5 (lima) faktor pemeringkatan, yaitu faktor kelembagaan, sosial-politik, ekonomi daerah, tenaga kerja dan produktivitas, serta infrastruktur fisik.

Dari Grafik 2.1. terlihat bahwa daerah-daerah yang berhasil menempati peringkat 10 besar teratas, karena ke-5 faktor daya tarik investasi yang mereka miliki mempunyai rata-rata yang baik, terutama untuk faktor-faktor yang mempunyai bobot besar seperti faktor kelembagaan (31%) dan sosial-politik(26%). Dengan nilai rata-rata setiap faktor baik maka secara akumulatif mereka akan memperoleh skor tinggi, dan menduduki peringkat teratas.

Sebagai contoh Kota Semarang yang menempati peringkat pertama secara umum,. Bila diperhatikan dengan seksama ternyata kelima faktor penentu daya tarik investasi yang dipunyai oleh Kota Semarang tidak satupun yang menempati urutan pertama, namun mempunyai nilai rata-rata baik. Peringkat pertama secara umum ini terutama diperoleh dari faktor kelembagaan dan sosial-politik yang mempunyai bobot penilaian yang sangat besar. Untuk faktor kelembagaan Kota Semarang yang berada pada posisi ke 14 (empat belas) dan posisi ke 3 (tiga) untuk faktor sosial-politik. Selain karena kedua faktor tersebut, faktor-faktor lainnya juga sangat mendukung, karena tiga faktor lainnya juga berada pada posisi 20 teratas (faktor Ekonomi Daerah pada posisi

*regions that obtained the same rate. Regions that belong to the first and the last ten ranks in terms of their general investment attractiveness are shown in Graph 1. below (Over-all Investment Attractiveness Rate of 134 Regencies/Cities can be seen in Appendix 1.1).*

*The first ten regions in the rank are Semarang City in the first rank, followed by Balikpapan City and Sawahlunto City in the second rank, and Tegal City in the third rank. The fourth until the tenth ranks are consecutively taken by Dairi Regency, Batam City, Tangerang City, Bekasi Regency, Kediri City, Pekanbaru City and Kendal Regency. Whereas the regions that belong to the last ten ranks are the Regency of Ende on the 117th rank, followed by Regency of Sumedang (118th), Regency of Tasik Malaya (119th), Regency of Pamekasan and Regency of East Flores on the 120th rank, and the 121th until the 126th ranks are consecutively taken by Regency of South Bengkulu, Regency of South Lampung, Regency of Pesisir Selatan, Regency of West Lombok, Regency of East Lampung, and Regency of Bima on the 126th rank. Said ratings are based on the perception of the local business community and secondary data for 42 (forty-two) indicators under the 5 (five) factors of rating, namely institution, socio-political, regional economy, labor and productivity, and physical infrastructure.*

*Graph 2.1. shows that the regions in the first ten rank got hold of said positions because the five factors on investment attractiveness that they possess are by average good, especially the factors that are the focus of attention, such as institution (31%) and socio-political(26%). With average value of "good" for each factor, said regions accumulate high scores, and obtain the highest ranks.*

*For example, Semarang City, which obtains the first rank in general. If subjected to keen observation, not one of the five factors that determine investment attractiveness enjoyed by Semarang City takes the first rank, but the region has obtained a good average score. This ranking is especially attributed to the factors of institution and socio-political, which have very high weight. Semarang City lands on the 14th (fourteen) rank in terms of Institutional factor, and 3rd (third) position in terms of socio-political factor. In addition to those factors, the other factors are very supporting too; the other three factors are also on the upper 20th positions (Regional Economy on the 12th position, Labor and Productivity on the*



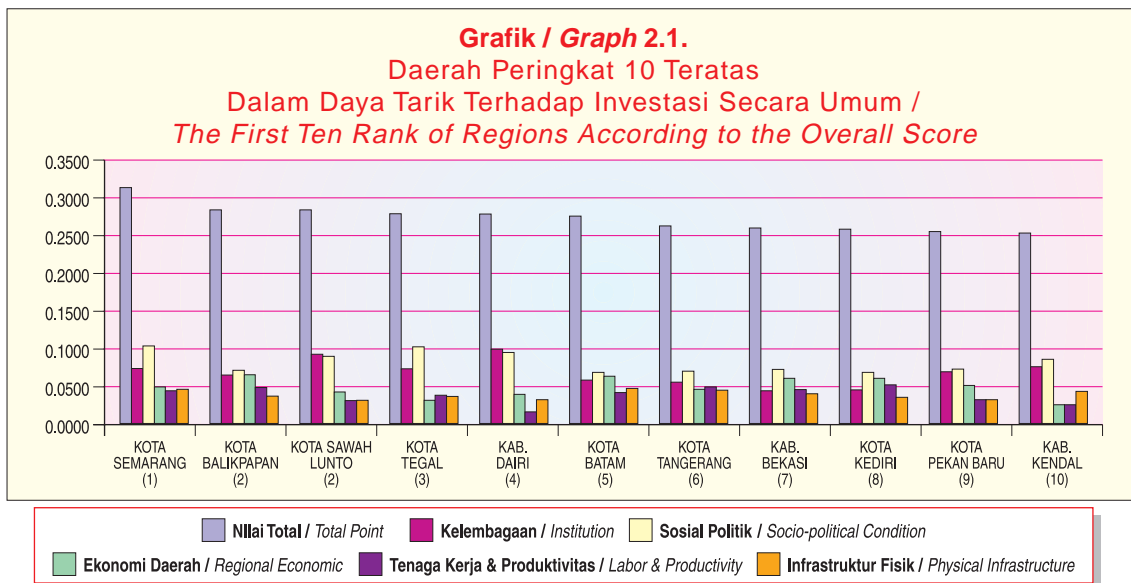

ke-12, faktor Ketenagakerjaan dan Produktivitas ke-17, dan faktor Infrastruktur Fisik pada posisi ke-2).

Daerah-daerah yang menempati peringkat 10 besar teratas bukan berarti tidak ada kekurangan. Grafik 2.1. memperlihatkan kekurangan dan kelebihan masing-masing daerah yang menduduki peringkat 10 besar teratas. Walaupun sebagai peringkat pertama, Kota Semarang perlu memperhatikan secara khusus dalam hal produktivitas, karena meskipun lebih unggul dibandingkan banyak daerah lainnya, namun masih kalah dibandingkan daerah-daerah di Jawa Barat dan Jawa Timur yang sektor manufakturnya sudah lebih berkembang. Jika Kota Semarang ingin bertahan pada peringkat teratas, maka harus berupaya keras meningkatkan produktivitas tenaganya, karena jika dilihat dari sisi biaya tenaga kerja hampir sama dengan biaya tenaga kerja dari sentra-sentra industri Jawa Barat. Dari 11 Kabupaten / Kota yang berada pada peringkat 10 besar teratas, permasalahan tenaga kerja paling besar dialami oleh Kab. Dairi. Untuk faktor Tenaga Kerja Kab. Dairi mendapat penilaian paling rendah, bahkan untuk peringkat faktor ketenagakerjaan berada pada posisi ke 95 (lihat Lampiran Peringkat Berdasarkan Faktor Ketenagakerjaan dan Produktivitas). Kab. Dairi berhasil pada posisi ke 4 lebih banyak diperoleh dari faktor Kelembagaan (peringkat 1), dan faktor Sosial Politik (peringkat 8).

Kota Sawahlunto di peringkat ke 2 serta Kota Semarang harus berupaya keras untuk mendatangkan investasi riil ke daerahnya, karena dari indikasi pertumbuhan ekonomi kedua daerah ini menunjukkan pertumbuhan yang rendah dibandingkan dengan rata-rata daerah lainnya terutama daerah-daerah industri di Jawa Barat, Kota Batam, Kabupaten Dairi, Kabupaten Kutai, dll. Bahkan untuk variabel Ekonomi Daerah kedua daerah tersebut masih kalah dibandingkan Kota

17th position, and Physical Infrastructure on the 2nd position).

*This rating does not imply that the regions belonging to the first ten ranks do not have any weaknesses. Graph 2.1. shows the strengths and weaknesses of each region that belongs to the first ten ranks. Eventhough it assumes the number one rate, Semarang City needs to pay special attention on productivity. Although it is better than many other regions, it is still inferior to the regions with more advanced manufacture sector in West Java and East Java. If Semarang City wants to maintain the top rating, it must endeavor to improve the productivity of its manpower, because if seen from labor cost, it has nearly the same labor cost with industrial centers in West Java. Among 11 Regencies/Cities which are on the first ten ranks, the Regency of Dairi faces labor as its worst problem. For this factor the Regency of Dairi got the lowest rating, that is 95 (see the Appendix of Rating according to Labor and Productivity Factor). The Regency of Dairi succesfully takes the 4th position more for Institutional factor (1st place), and Socio-Political factor (8th place).*

*Sawahlunto City, which is on the 2nd rank, and Semarang City have to strive to attract real investment to the region, because following the indicator of economic growth, these two regions show low growth compared to the other regions especially the industrial regions in West Java, Batam City, Regency of Dairi, Regency of Kutai, and so on. Even with the variable of Regional Economy, these two regions are still inferior to*



Balikipapan. Artinya pada tahun-tahun mendatang sangat mungkin terjadi Kota Balikpapan dapat menggeser kedudukan kedua daerah ini. Kedua daerah tersebut (Semarang dan Sawahlunto) perlu memfokuskan diri pada sektor yang masih potensial dikembangkan, serta tidak perlu menghabiskan banyak energi untuk mengejar investasi dari sektor yang sudah jenuh di daerahnya. Hal ini tidak hanya berlaku bagi kedua daerah itu, namun juga bagi daerah lain dalam fokus pengembangan ekonomi daerahnya.

*Balikipapan City. This means that in the next years, it is possible for Balikpapan City to surpass these two regions. The two regions –Semarang and Sawahlunto— need to focus on sectors that are still potential to be developed, and they do not need to spend much energy to pursue investment from saturated sectors in the region. This applies not only to the two regions, but also to other regions for the economic development of the regions.*

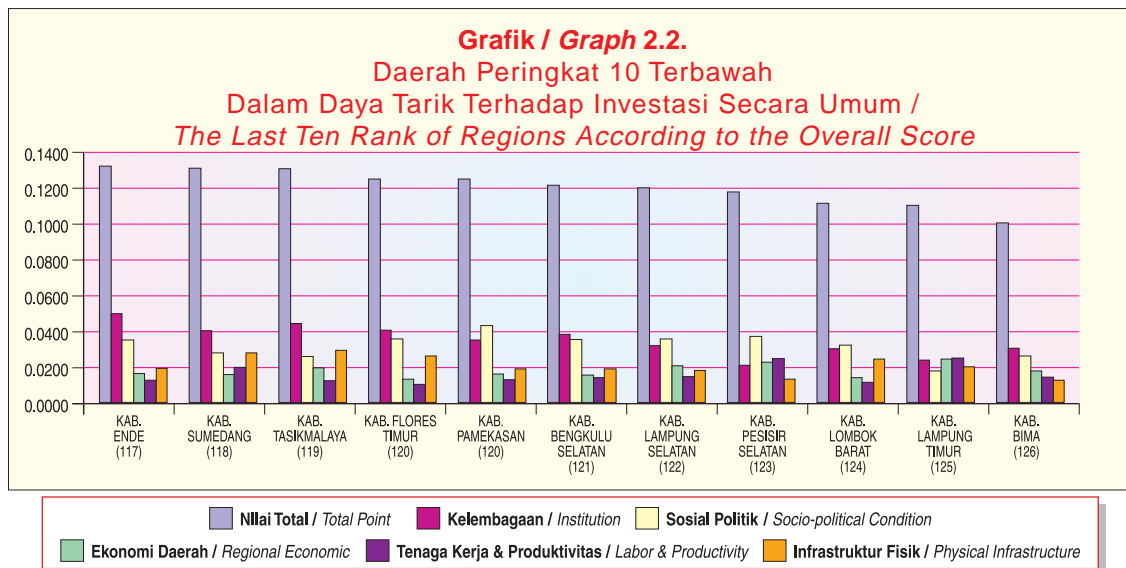

Daerah-daerah yang berada pada peringkat 10 terbawah, tidak berarti terpuruk untuk semua faktornya (*lihat Grafik 2.2.*) Keterpurukan peringkat secara umum dari daerah-daerah tersebut lebih banyak disebabkan oleh adanya kekurangan pada faktor Kelembagaan dan faktor Sosial Politik, seperti diperlihatkan pada Kab. Bima, Kab. Lampung Timur, Kab. Lampung Selatan dan Lombok Barat dimana faktor Kelembagaan dan Sosial-Politik juga berada pada posisi 10 besar terbawah (*lihat Lampiran Peringkat Faktor Kelembagaan dan Faktor Sosial Politik*). Bila kita telusuri masing-masing faktor pembentuk daya tarik daerah terhadap investasi untuk daerah-daerah yang berada pada peringkat 10 terbawah ini, sebenarnya ada daerah-daerah yang berpotensi untuk menduduki peringkat menengah ke atas. Sebagai contoh Kab. Lampung Timur, Kab. Pesisir Selatan, Kab. Tasik Malaya, dan Kab. Sumedang, ternyata untuk faktor-faktor yang tergabung dalam *Endowment Variable* mempunyai peringkat yang lumayan baik. Untuk Kab. Lampung Timur dan Kab. Pesisir Selatan misalnya; untuk faktor Ekonomi Daerah masing-masing berada pada peringkat ke 73 dan 77, sedangkan untuk faktor Tenaga Kerja dan Poduktivitas, berada pada peringkat 56 dan 59 (*lihat Lampiran Peringkat Faktor Ekonomi Daerah dan Peringkat Faktor Tenaga Kerja dan Produktivitas*). Dengan dua *endowment variable* seperti

*This rating does not suggest that the regions that are on the last ten ranks maintain factors that are all low (see Chart 2.2.) Low rating of these regions in general is caused more by Institutional and Socio-Political factors as discovered in the Regency of Bima, Regency of East Lampung, Regency of South Lampung and Regency of West Lombok where the factors of Institution and Socio-political are also in the last ten position (see Appendix of Rating on Institutional and Socio-Political Factors). If we look at each factor that determines investment attractiveness of these last ten regions, we can see that several of them are potential of taking the middle and upper ranks. The Regency of East Lampung, Regency of Pesisir Selatan, Regency of Tasik Malaya, and Regency of Sumedang are examples. In fact, for factors under the Endowment Variable, they make good enough rating. The Regency of East Lampung and Regency of Pesisir Selatan obtain the 73rd and 77th rank on Economic factor respectively, while 56th and 59th for Labor and Productivity (see Appendix of Rating on Regional Economy and Labor and Productivity Factors). With these two endowment variables that they possess at present, the two regions are capable of raising their rating on*

yang mereka miliki sekarang ini, kedua daerah tersebut dapat menaikkan peringkat daya tarik investasinya dengan memperbaiki faktor-faktor yang tergabung dalam *policy variable* yaitu Kelembagaan dan Sosial Politik. Hal yang sama juga dapat terjadi pada Kab. Tasik Malaya, Kab. Sumedang, Kab. Pamekasan dan Kab. Lombok Barat yang secara berurutan berada pada peringkat ke 30, 36, 45, dan 52 untuk faktor Infrastruktur Fisik (*lihat Lampiran Peringkat Faktor Infrastruktur Fisik*).

*investment attractiveness by improving the factors under the policy variable, meaning the Institutional factor and Socio-political factor. The same case is true for the Regency of Tasik Malaya, Regency of Sumedang, Regency of Pamekasan and Regency of West Lombok, that take consecutively the 30th, 36th, 45th, and 52nd ranks in terms of Physical Infrastructure Factor (see Appendix of Physical Infrastructure Factor).*

### B.2. Peringkat Daerah Berdasarkan Faktor Kelembagaan

Sembilan indikator kelembagaan prinsipnya mengukur empat variabel yaitu penggunaan wewenang aparat birokrasi, peraturan daerah, penggunaan keuangan daerah yang tercermin dalam APBD, dan kepastian hukum. Untuk peringkat daerah berdasarkan faktor kelembagaan dari 134 daerah yang diperingkat menghasilkan 114 peringkat karena ada beberapa daerah yang secara akumulasi per indikator dan variabel mempunyai nilai yang sama sehingga berada pada peringkat yang sama pula.

### B.2. Rating of Regions According to the Institutional Factor

*The nine indicators under the institutional factor applied here are actually the measurement of four variables, namely abuse of authority of government official, regional regulations, use of regional finance as reflected in the Regional Budget (APBD), and law certainty. The rating according to the institutional factor for 134 regions produces only 114 ranks because there are several regions that obtained the same cumulative value per indicator and variable such that they are in the same rank.*

Nilai tertinggi Kabupaten Dairi dari tujuh indikator menjadikan posisi Kab. Dairi sebagai daerah yang dipersepsikan paling baik faktor kelembagaannya. Sementara Kota Sawahlunto menempati urutan kedua yang didapat dari keunggulannya di delapan indikator kelembagaan. Meskipun Kota Sawahlunto lebih unggul di dua indikator yaitu indikator 'pungutan liar di luar birokrasi' dan 'hubungan eksekutif-legislatif', hanya kalah di indikator 'pelayanan birokrasi' dibandingkan

*The Regency of Dairi obtains the highest score in seven indicators making it a region perceived as having the best institutional factor. While Sawahlunto City takes the second position for its superiority on eight institutional indicators. Eventhough Sawahlunto City is superior on two indicators, namely on indicators of 'illegal levy' and 'relationship between executive and legislative branches', it is still inferior to the Regency of Dairi in terms of the indicator of 'government service',*

**Grafik / Graph 3.**  
**Daerah Peringkat 10 Teratas Terbatas Faktor Kelembagaan /**  
**The First and Last ten Rank of Regions According to the Institutional Factor**

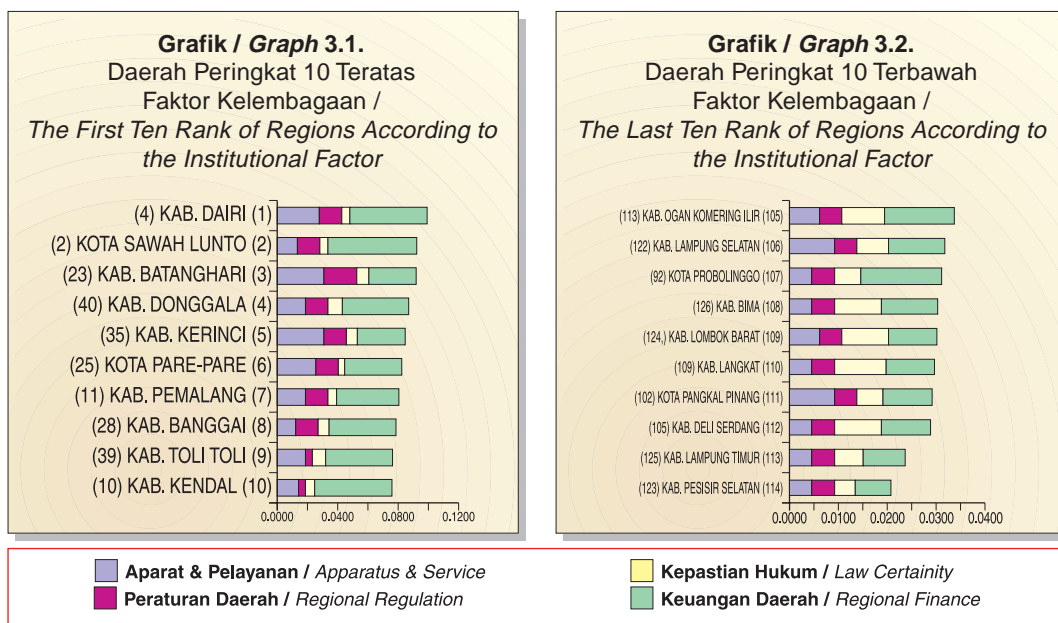

Kab. Dairi, namun secara kumulatif Kab. Dairi lebih unggul untuk faktor kelembagaan ini. Hal ini dikarenakan bobot indikator 'pelayanan birokrasi' jauh lebih signifikan dibandingkan bobot indikator lainnya. Sementara itu, kontribusi yang sangat signifikan dari indikator 'peraturan daerah' dan 'pelayanan birokrasi' membuat Kabupaten Batanghari menempati urutan ke 3 (tiga) faktor kelembagaan karena di dua indikator tersebut Batanghari dinilai sangat baik (*lihat Grafik 3.1.*)

Dalam persepsi umum secara nasional, dapat dikatakan cukup mengherankan masuknya dua Kabupaten dari Sulawesi Tengah yaitu Donggala dan Toli Toli yang merupakan daerah yang berdekatan dengan daerah konflik Kab. Poso ini dipersepsikan baik untuk indikator-indikator kelembagaan oleh pelaku usaha daerah. Padahal untuk daerah-daerah konflik ini secara umum dapat diasumsikan bahwa daerah yang berbatasan dengan daerah konflik akan disibukkan untuk perbaikan dan penanganan urusan yang berkaitan dengan faktor sosial politik dan keamanan. Dengan demikian pemerintah daerah kurang cukup waktu untuk membenahi hal-hal yang berkaitan dengan kelembagaan. Namun ternyata untuk faktor kelembagaan mereka dapat menempati peringkat 10 besar teratas yaitu untuk daerah Donggala berada pada peringkat 4 (empat) dan Kab. Toli Toli berada pada peringkat 5 (lima) untuk faktor kelembagaan. Sayangnya untuk indikator-indikator pada faktor pemeringkatan lainnya mendapat skor kecil (infrastruktur, keuangan daerah, dll) mereka kurang baik sehingga kedua daerah tersebut hanya menempati urutan tiga puluh besar untuk peringkat secara total.

Sementara itu untuk daerah-daerah yang menempati peringkat 10 terbawah untuk faktor kelembagaan ternyata lima diantaranya juga berada pada peringkat 10 terbawah untuk pemeringkatan secara total. Kelima daerah tersebut adalah Kab. Lampung Selatan peringkat total 122 untuk kelembagaan peringkat 106 (122 / 106), Kab. Bima (126/108), Kab. Lombok Barat (124/109), Kab. Lampung Timur (125/113) dan Kab. Pesisir Selatan (123/114). Selanjutnya diketahui pula bahwa kecuali Kota Probolinggo yang berada pada peringkat 92 untuk peringkat total, seluruh daerah yang berada pada peringkat 10 terbawah untuk faktor kelembagaan, untuk peringkat secara total mereka juga berada di bawah peringkat ke-100. Keterpurukan daerah-daerah ini lebih banyak disebabkan selain karena indikator aparatur dan pelayanan birokrasi, dan kepastian hukum yang tidak baik juga karena perda di daerah ini dinilai dapat mendistortisi iklim usaha di daerah tersebut (*lihat Grafik 3.2.*)

*but cumulatively the Regency of Dairi is superior on over-all institutional factor. This is because the weight of the indicator of 'government service' is much more significant than that of other indicators. Whereas, the very significant contribution from the indicators of 'regional regulation' and 'government service' enables the Regency of Batanghari to win the 3 (three) institutional factors as it shows its advantage on them. (see Graph 3.1.)*

*Generally, at the national level, it is surprising that two Regencies from Central Sulawesi, namely the Regency of Donggala and Regency of Toli Toli, which are located near the center of conflict in Poso Regency, are perceived by the local business community to have good insitutional indicators. This is inspite of general assumption that regions bordering conflicting region are busy with improving and handling things related to socio-political and security factors, thus the regional governments do not have enough time to conduct any institutional building. But it turns out that they hold of the 10 upper positions, i.e. Regency of Donggola on the 4th (fourth) and Regency of Toli Toli on the 5th (fifth) position for institutional factor. Unfortunately, for the indicators under the other factors, they got small rate (physical infrastructure, regional finance, etc), thus these two regions only took the upper thirty rank for the over-all rating.*

*While, five of the regions that belong to the last ten ranks for institutional factor turn out to be on the last ten ranks for the over-all rating. The five regions are the Regency of South Lampung with 122 for over-all rating and 106 for institutional rating (122/106), Regency of Bima (126/108), Regency of West Lombok (124/109), Regency of East Lampung (125/113) and Regency of Pesisir Selatan (123/114). It also shows that, except for Probolinggo City, which is on the 92nd position for the over-all rating, all regions in the last ten ranks for institutional factor got below 100 for over-all rating. The low position of these regions is caused more by the indicator of apparatus, government service, and law certainty. Moreover, the regional regulations of these regions are perceived to interfere with business climate. (see Graph 3.2.)*



### B.3. Peringkat Daerah Berdasarkan Faktor Sosial Politik

Secara keseluruhan untuk peringkat daerah berdasarkan Faktor Sosial Politik Budaya terdapat 94 peringkat. Tujuh Kabupaten dan Kota di Jawa Tengah mendominasi peringkat atas dari urutan 1 (satu) sampai 7 (tujuh), baru diikuti Kab. Dairi, Kota Sawahlunto dan Kab. Gianyar di urutan 8 (delapan), 9 (sembilan), dan 10 (sepuluh). Peringkat Kab. Pekalongan (1), Kabupaten Magelang (2), Kota Semarang (3) dan empat daerah lainnya di Jawa Tengah yang dipersepsikan kondusif dalam hal keamanan, sosial politik, dan budaya, menegaskan pengetahuan umum tentang kondusifnya sebagian besar daerah Jawa Tengah bagi investasi dalam faktor sosial-politik. Walaupun berada pada peringkat tujuh besar untuk faktor sosial politik, namun jika dilihat dari indikator 'partisipasi masyarakat dalam penyusunan peraturan daerah' dan indikator 'etos kerja', yang merupakan 2 diantara 11 indikator pembentuk faktor sosial-politik, beberapa daerah dalam 7 (tujuh) besar tersebut kalah dibandingkan dengan daerah lainnya. Posisi tujuh besar tersebut diperoleh karena 9 indikator lain dalam faktor sospolbudkam dari tujuh daerah tersebut dinilai baik oleh para pelaku usaha. Dengan demikian mereka dapat menduduki peringkat 7 (tujuh) besar untuk faktor sosial-politik. Selanjutnya di luar daerah Jawa Tengah, Kabupaten Dairi, Kota Sawahlunto dan Kabupaten Gianyar juga dipersepsikan baik yang menghasilkan nilai tidak jauh berbeda dengan ketujuh daerah tersebut di atas. Bila diperhatikan bobot penilaian per indikatornya, indikator 'kecepatan aparat

### B.3. Rating of Regions According to Socio-Political Factor

Over all, there are 94 ranks for the rating according to the Socio-Political and Cultural Factor. Seven Regencies and Cities in Central Java dominate the upper ranks, from the first until the seventh ranks, followed by the Regency of Dairi, Sawahlunto City and Regency of Gianyar on the 8th (eighth), 9th (ninth), and 10th (tenth) ranks consecutively. The Regency of Pekalongan (1st), Regency of Magelang (2nd), Semarang City (3rd) and the other four regions in Central Java, which are perceived to be conducive in terms of security, socio-political, and cultural condition, affirm public concern about the conduciveness of most Central Java regions for investment in terms of socio-political factor. Although they belong to the top seven for socio-political factor, if seen from the indicator of 'openness of bureaucracy for the participation of business community in policy formulation' and indicator of 'community's working ethos', which constitute 2 of 11 indicators that form the Socio-political factor, some of those regions are inferior to the other regions. The top seven positions are obtained because the other 9 indicators under the Socio-political factor of these seven regions are perceived by the business community to be good. Thus they belong to the top seven ranks for Socio-political factor. And outside the regions of Central Java, the Regency of Dairi, Sawahlunto City and Regency of Gianyar are also perceived good thus they obtained scores not too different from the above seven regions. If we pay attention to the assessment value per indicator, the indicators of 'quick response of security

#### Grafik / Graph 4.

Daerah Peringkat 10 Teratas Terbawah Faktor Sosial Politik /  
The First and Last Ten of Regions According to the Socio-Political Factor

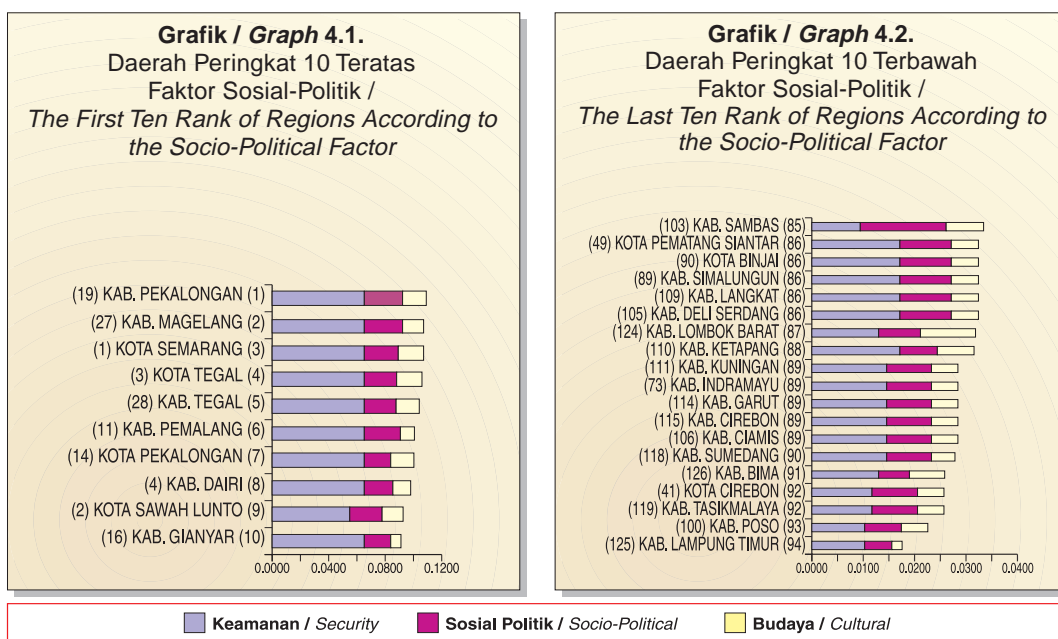



menanggulangi masalah keamanan', 'gangguan terhadap aktivitas usaha', dan 'stabilitas politik' mempunyai kontribusi besar yang membawa daerah-daerah tersebut di atas menduduki sepuluh besar peringkat (*Grafik 4.1.*)

Terdapat 19 daerah yang berada pada peringkat 10 terbawah (85 - 94) untuk Peringkat Faktor Sosial Politik. Secara umum daerah-daerah yang berada pada peringkat 10 terbawah untuk faktor Sosial Politik, untuk peringkat secara total juga pada peringkat yang relatif di bawah. Bahkan dari 19 daerah yang berada pada peringkat 10 terbawah, 5 diantaranya untuk peringkat secara total juga berada pada peringkat 10 terbawah, yaitu Kab. Lombok Barat (Total : 124 / Sospolbud : 87), Kab. Subang (118/90), Kab. Bima (126/91), Kab. Tasik Malaya (119/92) dan Kab. Lampung Timur (125/94). Hal ini semakin membuktikan bahwa dengan bobot terbesar untuk faktor Kelembagaan dan Sosial-Politik akan dapat membuat suatu daerah menjadi terpuruk atau sebaliknya terangkat peringkat daya tariknya terhadap investasi.

Hal lain yang ditemukan dari peringkat 10 terbawah untuk peringkat berdasarkan faktor Sosial-Politik adalah bahwa terdapat dua daerah yang secara total menduduki peringkat menengah atas tetapi untuk peringkat faktor Sosial-Politik terpuruk pada posisi 10 terbawah. Kedua daerah tersebut adalah Kota Pematang Siantar dan Kota Cirebon, dimana kedua daerah ini untuk peringkat total masing-masing berada pada peringkat ke 49 dan ke 41, tetapi untuk peringkat berdasarkan faktor Sosial-Politik berada pada peringkat ke 86 dan 92. Untuk peringkat secara total, kedua daerah ini cukup potensial untuk dapat berada pada peringkat yang lebih baik, jika dapat dengan segera memperbaiki kondisi-kondisi sosial-politik yang ada di daerahnya. Terlebih lagi mengingat kedua daerah ini memiliki *endowment variable* yang cukup baik. (*Grafik 4.2.*)

#### B.4. Peringkat Daerah Berdasarkan Faktor Ekonomi Daerah

Dari 134 daerah yang diperingkat berdasarkan enam indikator ekonomi daerah yang berasal dari *existing statistic* data untuk menilai faktor Ekonomi Daerah, diperoleh 107 peringkat. Berdasarkan penilaian terhadap enam indikator dalam faktor ekonomi daerah yang ada, menunjukkan bahwa struktur serta potensi ekonomi pada peringkat 10 besar teratas adalah Kab. Asahan, Kota Balikpapan, dan Kota Batam dalam urutan 1 (satu), 2 (dua), dan 3 (tiga) (*Grafik 5.1*). Keunggulan Kab. Asahan dibanding dua daerah lainnya tersebut terutama diperoleh dari kontribusi nilai tambah sektor primernya yang tinggi. Sedangkan Kota Balikpapan dan Kota Batam didukung oleh nilai yang tinggi untuk indikator-indikator potensi ekonominya dari 'PDRB per kapita',

*officers in handling security problems, 'business security' and 'political stability' give big contribution putting those regions in the first ten ranks (Graph 4.1.)*

*There are 19 regions in the last ten ranks (85–94) under the Socio-political Factor. In general, the regions that are on the last ten ranks for Socio-political Factor are also on relatively bottom positions. Out of 19 regions on the last ten rank, 5 are also on the last ten ranks for the over-all rating, namely the Regency of West Lombok (Over-all rate: 124/Socio-political factor: 87), Regency of Subang (118/90), Regency of Bima (126/91), Regency of Tasik Malaya (119/92) and Regency of East Lampung (125/94). Evidently, this shows that the weight for Institutional, and Socio-political Factors influences the over-all rating of a region on investment attractiveness.*

*The last ten rank for the rating according to Socio-political factor also reveals that there are two regions that occupy the middle-upper ranks in the over-all rating but in terms of rating for Socio-political factor, they were pulled to the last ten positions. The two regions are Pematang Siantar City and Cirebon City, where the over-all rating of these two regions is 49th and 41st, while they occupy the 86th and 92nd rank for the rating on Socio-political factor. Based on the over-all rating, the two regions are potential to gain better rating if they can immediately improve their socio-political and cultural conditions. Moreover, these regions possess good endowment variable. (Graph 4.2.)*

#### B.4. Rating of Regions according to the Factor of Regional Economy

*Of 134 regions that are rated following the six indicators under the regional economy based on existing statistical data, 107 ranks were obtained. Based on the six indicators under the regional economy factor, it shows that in terms of structure and potential of economy the first ten ranks were awarded to the Regency of Asahan, Balikpapan City, and Batam City in the 1st (first), 2nd (second), and 3rd (third) positions (Chart 5.1). The superiority of the Regency of Asahan over the other two regions is attributed especially from the contribution of its high value-added primary sector. While Balikpapan City and Batam City are supported by their scores for the indicators under the economic potential such as*

'pertumbuhan PDRB', dan 'indeks pembangunan manusianya (IPM)'.

Pertumbuhan ekonomi Kota Batam yang sangat tinggi jauh di atas rata-rata dari 134 daerah selama 5 (lima) tahun terakhir menunjukkan hasil nyata dari investasi pemerintah pusat selama ini untuk mengembangkan kawasan perdagangan bebas tersebut dengan berbagai stimulus perekonomian yang diberikan kepada investor disana. Bila dilihat PDRB perkapita serta IPM nya juga memperlihatkan kontribusi sangat nyata dari kawasan khusus tersebut bagi perekonomian daerah. Patut disayangkan bila potensi ini terganggu bila indikasi 'salah urus' akibat disharmoni hubungan pemerintah kota dengan pihak otorita menjadi kontributor negatif yang signifikan. Penilaian pelaku usaha di Batam terhadap indikator 'stabilitas politik', 'hubungan eksekutif dan legislatif' yang tidak baik patut disikapi secara bijak oleh kedua pemain utama penentu iklim investasi tersebut.

'PDRB per capita', 'economic growth', and 'human development index (IPM)'.

The economic growth of Batam City, which is much higher than the average of 134 regions in the last 5 (five) years, shows the real result of the central government investment all this time to develop said free trade area through various economic stimuli given to investors. Evident from the PDRB per capita and Human Development Index it reveal real contribution from this special region for the regional economy. This may be disturbed if the indication of 'mismanagement' resulting from the disharmonious relation between city government and the Authoritative Body becomes the significantly negative contributor. The negative assessment of business community toward the indicators of 'political stability', 'relationship between executive and legislative branches' must be given prudent attention for these are two main features that determine investment climate.

### Grafik / Graph 5.

#### Daerah Peringkat 10 Teratas Terbatas Faktor Ekonomi Daerah / The First and Last Ten Rank of Regions According to the Factor of Regional Economy

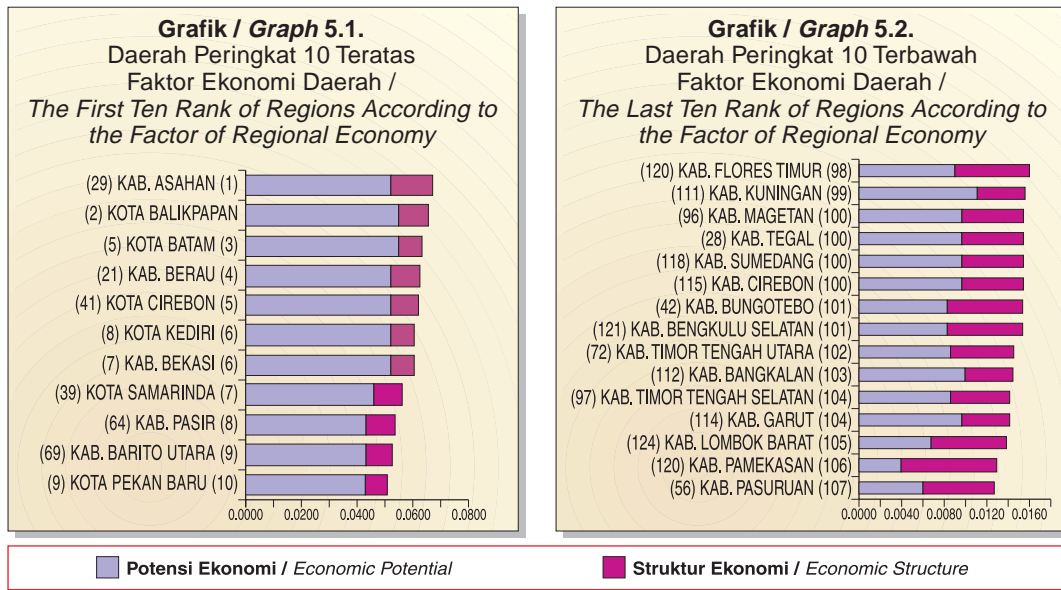

Sementara untuk daerah-daerah yang berada pada posisi 10 besar terbawah ada 15 daerah yaitu dari peringkat ke 98 sampai dengan peringkat ke 107 (Grafik 5.2). Keterpurukan peringkat pada faktor ekonomi daerah tidak secara otomatis mengakibatkan keterpurukan pada peringkat secara total. Hal ini diperlihatkan oleh Kab. Tegal, Kab. Bungo Tebo, dan Kab. Pasuruhan, dimana peringkat daya tarik investasi secara total untuk masing-masing daerah secara berurutan adalah pada posisi 28 untuk Kab. Tegal, posisi 42 untuk Bungo Tebo, dan ke 56 untuk Kab. Pasuruhan. Ketiga daerah ini memperoleh peringkat tinggi untuk peringkat secara total lebih banyak dari faktor

There are 15 regions, i.e. from 98th to 107th ranks (Graph 5.2) that share the last ten positions. Poor rating on regional economy does not automatically result to poor over-all rating. This is revealed by the Regency of Tegal, Regency of Bungo Tebo, and Regency of Pasuruhan, where the over-all investment attractiveness rating for each region falls on the 28th position for Regency of Tegal, 42th position for Bungo Tebo, and 56th for Regency of Pasuruhan. These three regions obtained higher ranking for the over-all rating compared to the Institutional factor (Regency of Bungo Tebo (11th), Regency of Tegal (29th), and

Kelembagaan (Kab. Bungo Tebo (11), Kab. Tegal (29), dan Kab. Pasuruhan (34)), serta faktor Sosial Politik Budaya (Kab. Tegal (5), Kab. Bungo Tebo (15), Kab. Pasuruhan (32)). Karena bobot pemeringkatan untuk faktor Ekonomi Daerah tidak sebesar faktor Kelembagaan dan faktor Sosial Politik Budaya, walaupun untuk faktor Ekonomi Daerah mereka terpukul pada peringkat 10 besar terbawah tetapi untuk peringkat secara torat berada pada peringkat menengah ke atas.

Dari pemeringkatan berdasarkan faktor Ekonomi Daerah juga masih dijumpai lima dari 15 daerah yang berada pada peringkat 10 terbawah untuk faktor Ekonomi Daerah, untuk peringkat secara total juga pada peringkat 10 terbawah. Kelima daerah tersebut adalah Kab. Flores Timur, Kab. Sumedang, Kab. Bengkulu Selatan, Kab. Kab. Lombok Barat, dan Kab. Kab. Pamekasan yang masing-masing untuk peringkat secara total berada pada peringkat 120, 118, 121, 124, dan 120, sedangkan untuk peringkat berdasarkan faktor Ekonomi Daerah berada pada peringkat 98, 100, 101, 105, dan ke-106. Agar daerah-daerah ini dapat meningkatkan daya tariknya terhadap investasi, beberapa faktor yang tergabung dalam *policy variable* (kelembagaan dan sosial politik) kiranya perlu untuk segera dibenahi. Dalam waktu bersamaan, kiranya orientasi pembangunan di daerah yang bersangkutan juga diarahkan pada upaya-upaya untuk membenahi dan membangun infrastruktur fisik dan kualitas sumber daya manusianya. Pembenahan pada sektor pendidikan untuk meningkatkan kualitas sumber daya manusia memang membutuhkan waktu yang tidak singkat untuk dapat terlihat hasilnya, tetapi untuk jangka panjang strategi ini akan dapat meningkatkan daya saing investasi daerahnya. Perbaikan sarana dan prasarana pendukung untuk kegiatan usaha juga perlu mendapat perhatian, karena pada kondisi normal semestinya untuk menilai daya tarik investasi suatu daerah, faktor infrastruktur fisik akan mendapat bobot yang cukup besar dibandingkan faktor sosial politik dan kelembagaan.

#### **B.5. Peringkat Daerah Berdasarkan Faktor Tenaga kerja & Produktivitas**

Untuk faktor Tenaga kerja dan Produktivitas terdapat 116 peringkat (*Grafik 6.1.*). Dalam hal ketenagakerjaan yang mencakup ketersediaan, biaya dan produktivitas tenaga kerja, peringkat 1 (satu), 2 (dua) dan 3 (tiga) diduduki oleh Kota Palembang, Kota Bandar Lampung, dan Kota Malang secara berurutan. Untuk faktor ini, daerah yang berdekatan dengan pusat pertumbuhan Jakarta, hanya Kota Tangerang yang masuk dalam sepuluh besar dengan menempati peringkat 8 (delapan). Walaupun dari indikator

*Regency of Pasuruhan (34th)), and Socio-political and Cultural factor (Regency of Tegal (5th), Regency of Bungo Tebo (15th), Regency of Pasuruhan (32th)). Because the weight of rating on Regional Economy Factor is not as big as the Institutional factor and Socio-political and Cultural factor, for the over-all rating, they were able to obtained the middle-upper rank although for Regional Economy factor they are on the last ten positions.*

*Five of 15 regions that are on the last ten ranks for the over-all rating are on the last ten ranks in terms of the rating on Regional Economy factor. The five regions are the Regency of East Flores, Regency of Sumedang, Regency of South Bengkulu, Regency of West Lombok, and Regency of Pamekasan, which are consecutively on the 120th, 118th, 121st, 124th, and 120th ranks for the over-all rating, and on the 98th, 100th, 101st, 105th and 106th ranks for the rating on Regional Economy factor. In order for these regions to enhance their investment attractiveness, several factors under policy variable (institutional and socio-political factors) should be given attention. At the same time, the development orientation of these regions should be directed toward strengthening and developing of physical infrastructure and enhancing the quality of their human resources. Improving the education sector to upgrade the quality of human resource indeed needs a long time for the result to be visible, but for the long term, this strategy is capable of improving the competitive advantage of the region. Improvement in supporting facility and infrastructure for business activities also needs attention, because in the normal condition, it is believed that in assessing the investment attractiveness of a region, the factor of physical infrastructure enjoys more weight than that of socio-political and institutional factors.*

#### **B.5. Rating of Region According to Factor of Labor & Productivity**

*For the factor of Labor and Productivity, there are 116 ranks produced (Graph 6.1.). In terms of manpower that includes the availability, cost, and productivity of manpower, the 1st (first), 2nd (second) and 3rd (third) ranks are obtained by Palembang City, Bandar Lampung City, and Malang City consecutively. Under this factor, among the regions that are situated near the growth center of Jakarta, only Tangerang City that obtains the top five rank, obtains the 8th (eighth) rank. Although from the*



'produktivitas' dan 'ketersediaan tenaga kerja' baik yang sudah maupun belum berpengalaman tidak kalah dengan tujuh daerah peringkat di atasnya; namun dalam indikator 'biaya tenaga kerja normatif' yang diatur dalam UMP/UMK maupun 'biaya tenaga kerja aktual' yang dikeluarkan pelaku usaha untuk tenaga kerja di Kota Tangerang lebih tinggi dibanding daerah-daerah tersebut di atas. Akibatnya dilihat dari faktor Ketenagakerjaan dan Produktivitas secara keseluruhan Kota Tangerang kalah kompetitif dibanding ketujuh daerah peringkat di atasnya. Selain Kota Tangerang, daerah-daerah sekitar Jakarta seperti Kabupaten Bekasi, Kabupaten Karawang, Kabupaten Bogor, Kabupaten Tangerang, menghadapi masalah serupa yaitu biaya tenaga kerja yang relatif tinggi. Untuk *foot loose industry* yang *exit barrier*-nya kecil, daerah-daerah tersebut patut berhati-hati, mengingat para kompetitor terdekatnya mempunyai infrastruktur fisik dan dukungan budaya yang kondusif, seperti daerah-daerah di Jawa Tengah misalnya. Daerah-daerah tersebut dapat menjadi ancaman serius baik bagi investasi baru, maupun bagi industri yang sudah ada disana. Karena dengan keunggulan dari segi murahnya biaya tenaga kerja dan kondisi sosial politik budaya yang lebih kondusif, sangat mungkin para investor yang telah ada akan memindahkan tempat produksinya ke daerah lain yang lebih kondusif dan dengan biaya tenaga kerja yang relatif lebih murah.

Dari pemeringkatan berdasarkan faktor Ketenagakerjaan dan Produktivitas ini ditemukan bahwa dilihat dari daerah-daerah yang menempati peringkat

*indicator of 'labor productivity' and 'manpower availability' both for experienced and inexperienced workers, Tangerang City is as good as the seven regions above its rank, but its rank for the indicator of 'normative labor cost' regulated in UMP/UMK and 'the actual labor cost' paid by the business community for workers in Tangerang City is higher than those of the other regions mentioned above. As a result, the factor of Labor and Productivity as a whole places Tangerang City not less competitive than the seven regions above its rank. Apart from Tangerang City, the regions around Jakarta such as the Regency of Bekasi, Regency of Karawang, Regency of Bogor, Regency of Tangerang, are facing similar problem, that is their labor cost is relatively high. For the foot loose industry with small exit barrier, said regions should be careful because their nearest competitors have physical infrastructure and support of conducive culture, like regions in Central Java, for example. Those regions can present serious threat both for new investment and for the existing industry. Because of its advantage in cheap labor cost and conducive social, political and cultural condition, it is possible that the existing investors will move their production site to other regions that are more conducive and have relatively lower labor cost.*

*From the rating based on the factor of Labor and Productivity, this study uncovers that from the regions belonging to the top 30, 22 (73.33%)*

**Grafik / Graph 6.**

**Daerah Peringkat 10 Teratas Terendah Faktor Tenaga Kerja & Produktivitas / The First and Last Rank Ten of Regions According to the Factor of Labor & Productivity**

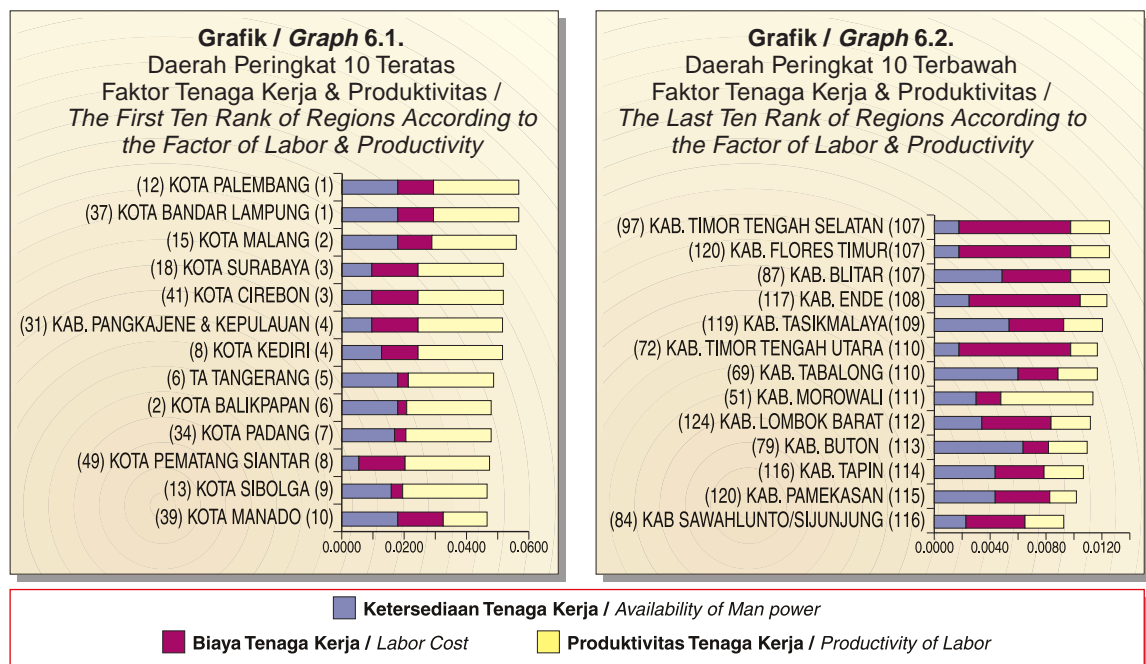



30 besar, ternyata 22 (73.33%) diantaranya adalah daerah kota. Kondisi ini dimungkinkan karena faktor tenaga kerja khususnya kualitas dan produktivitas tenaga kerja sangat dipengaruhi oleh pendidikan dari tenaga kerja atau tingkat pendidikan sumber daya manusia yang tersedia di daerah yang bersangkutan. Sebagaimana diketahui hingga saat ini sarana dan prasarana pendidikan di daerah perkotaan lebih baik dibandingkan di daerah pedesaan (kabupaten), sehingga daerah-daerah perkotaan akan menghasilkan SDM yang relatif lebih baik dibandingkan dengan daerah kabupaten. Dengan demikian wajar jika kemudian untuk pemeringkatan daerah berdasarkan faktor ketenagakerjaan dan produktivitas untuk peringkat atas didominasi oleh daerah-daerah kota.

Sementara itu dari 13 daerah yang berada pada peringkat 10 terbawah berdasarkan faktor ketenagakerjaan tidak satupun yang merupakan daerah kota, bahkan 45 daerah yang berada pada peringkat terendah semuanya juga daerah kabupaten (*Grafik 6.1.*). Dari daerah-daerah yang berada pada peringkat bawah berdasarkan faktor Tenaga Kerja dan Produktivitas, terlihat bahwa dari ketiga variabel pembentuknya memang rendah, yaitu baik dari segi ketersediaan, kualitas, maupun dari segi produktivitasnya. Jika dilihat dari variabel kualitas tenaga kerja dari daerah-daerah yang menempati peringkat 10 terbawah, terlihat bahwa Kab. Ende dan Kab. Timor Tengah Utara, relatif lebih baik dibandingkan 11 daerah lain yang berada di peringkat 10 terbawah. Sementara dari variabel produktivitas, Kab. Morowali merupakan daerah yang relatif paling baik dibandingkan dengan 11 daerah lain pada peringkat 10 terbawah untuk faktor Ketenagakerjaan dan Produktivitas. Untuk dapat meningkatkan daya saing daerah-daerah ini dibandingkan dengan daerah lainnya, kiranya perbaikan-perbaikan pada sektor pendidikan perlu dijadikan prioritas dalam pembangunan di daerah-daerah ini. Peningkatan kualitas pendidikan masyarakat merupakan investasi jangka panjang bagi daerah dan bagi masyarakatnya, dimana hasil dari investasi tersebut baru akan terasa pada jangka waktu yang cukup lama.

#### **B.6. Peringkat Daerah Berdasarkan Faktor Infrastruktur Fisik**

Sebagaimana bisa diduga, daerah-daerah Jawa, Bali dan sebagian Sumatra menempati posisi baik dalam hal infrastruktur fisik penunjang daya tarik investasi. Pengembangan sarana fisik yang difokuskan di Jawa jelas menguntungkan daerah-daerah di kawasan ini, jauh meninggalkan daerah-daerah dari kawasan di luar Jawa yang kurang mendapat perhatian selama puluhan tahun. Kota Batam, Kota Semarang, kota Surabaya, Kabupaten

*of them are urban areas. This condition is possible because of factor of labor, especially the quality and productivity of labor is much influenced by the level of education of human resource available in the related regions. As it is known up to now educational facility and infrastructure in urban areas are better than that of rural areas (regencies), thus urban areas produce relatively better human resource than the regency areas. Consequently, it is anticipated then that the upper ranks rating for the factor of labor and productivity are dominated by the urban areas.*

*Whereas, among 13 regions which are on the last ten rank for the factor of labor, none is an urban area, even the 45 regions in the lowest ranks are all regency areas (Graph 6.1.). Regions in the lower rank for the factor of Labor and Productivity show that the three forming variables are low, that is the availability, quality, and productivity of labor. From among the regions in the lowest ten ranks for the variable of quality of manpower, it is clear that the Regency of Ende and Regency of North Central Timor are relatively better than the other 11 regions. While for the variable of productivity, the Regency of Morowali was chosen as the best region among 11 other regions in the lowest ten ranks for the factor of Labor and Productivity. To advance the competitive advantage of these regions over the other regions, there is a need to improve the education sector. This sector needs to be prioritized for the development of these regions. Upgrading society's education requires a long term investment for the region and its society, for which the result of this investment will be of benefit for a long period of time.*

#### **B.6. Rating of Regions According to the Factor of Physical Infrastructure**

*As expected, the regions of Java, Bali and some parts of Sumatra dominate good positions in terms of physical infrastructure that support investment attractiveness. The development of physical facility that was focused in Java is obviously benefitable for its regions, leaving far behind the regions outside Java as they were given less attention for decades. Batam City, Semarang City, Surabaya City, Regency of*

**Grafik / Graph 7.**

**Daerah Peringkat 10 Teratas Terbatas Faktor Infrastruktur Fisik /  
The First and Last Ten Rank of Regions According to the Factor of Physical Infrastructure**

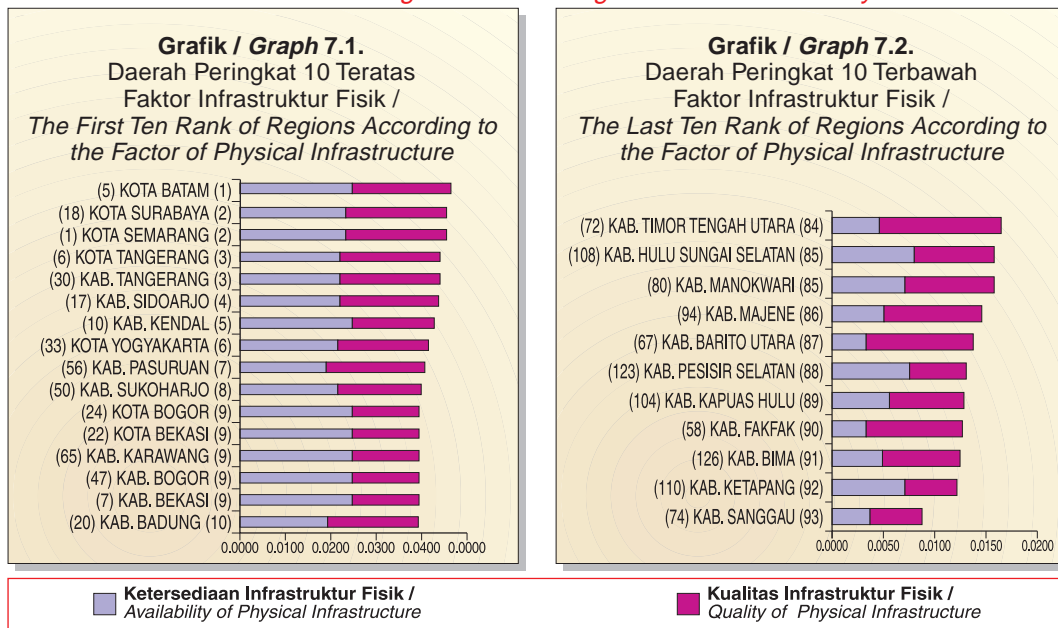

Tangerang, Kota Tangerang dan beberapa daerah Jawa lainnya menduduki peringkat 1 (satu) sampai 5 (lima) serta urutan lainnya di sepuluh besar.

Dari peringkat daerah berdasarkan faktor Infrastruktur fisik ditemukan pula bahwa dari 41 daerah yang berada pada peringkat 30 teratas, 23 diantaranya merupakan daerah kota (13 dari Jawa dan Bali, 10 dari luar Jawa - Bali), 16 merupakan daerah kabupaten yang berasal dari Jawa dan Bali, dan hanya 2 daerah yang merupakan daerah kabupaten yang berasal dari luar Jawa dan Bali. Hal sebaliknya terjadi pada 43 daerah yang menempati peringkat 30 terbawah. Dari 43 daerah tersebut hanya satu yang merupakan daerah kota (Kota Pangkal Pinang), dan tak satu pun dari daerah tersebut berasal dari Pulau Jawa atau Bali. Temuan ini menunjukkan bahwa kesenjangan pembangunan infrastruktur fisik antara daerah di Pulau Jawa dan Bali dengan daerah di luar kedua pulau tersebut, serta antara daerah perkotaan dan pedesaan, masih berlangsung dan dampaknya masih terlihat sampai sekarang.

Namun berdasarkan persepsi dunia usaha, dalam hal penentuan peringkat keseluruhan, indikator-indikator dalam infrastruktur fisik ini tidak cukup signifikan sebagai indikator penentu, karena bobotnya yang kalah jauh dibandingkan bobot indikator-indikator kelembagaan dan sospolbudkam. Artinya bahwa paling tidak daerah-daerah di luar Jawa dan Bali tidak 'kalah dahulu sebelum bertanding' dibandingkan daerah-daerah di Jawa. Dengan demikian paling tidak untuk kompetisi dalam pemeringkatan kali ini dapat dikatakan relatif ketat. Tetapi yang perlu disadari oleh daerah-daerah yang masih lemah untuk faktor infrastruktur

Tangerang, Tangerang City and several other areas of Java obtained the 1st (first) until the 5th (fifth) ranks and other sequence in the top ten.

From the regions' rating for the factor of Physical Infrastructure, out of 41 regions which are on the upper 30 ranks, 23 are urban areas (13 from Java and Bali, 10 from outside of Java - Bali), 16 are regencies in Java and Bali, and only 2 regions are outside of Java and Bali. The reverse is true for 43 regions that take the lowest 30 ranks. Out of 43 regions, only one is an urban area (Pangkal Pinang City), and none of the regions is from Java or Bali Islands. This finding shows that the gap in terms of physical infrastructure development between the regions in Java and Bali Islands and other regions outside these islands, and between urban areas and rural areas still exists and its impact is still evident up to now.

But from the perception of business community, in determining the over-all rating, indicators under the physical infrastructure is not so significant as determining indicator because their weight is lower than that of indicators under the institutional and socio-political, cultural and security factors. This means that at least the regions outside Java and Bali are not at par with the regions in Java in competition. Thus, at least at this time of rating, it can be said that competition is relatively tight. But the regions that are still weak in terms of factor of physical infrastructure must realize that low value given to

fisiknya adalah, dengan bobot yang relatif lebih kecil untuk faktor infrastruktur fisik dibandingkan faktor Kelembagaan dan terutama faktor Sosial Politik Budaya pada pemeringkatan kali ini, menunjukkan bahwa kondisi daya tarik investasi daerah-daerah di Indonesia belum normal. Jika daya tarik investasi daerah-daerah telah normal, semestinya bobot yang lebih besar adalah untuk faktor Perekonomian Daerah, Infrastruktur Fisik, dan Ketenagakerjaan. Dengan demikian, jika mau berfikir ke depan dan untuk tujuan jangka panjang, daerah-daerah tersebut perlu melakukan upaya-upaya untuk penambahan dan perbaikan infrastruktur fisik.

### C. GAMBARAN DAYA TARIK INVESTASI DAERAH KABUPATEN / KOTA

Hasil penelitian lapangan di 20 daerah disajikan dalam 2 (dua) bagian, pertama, laporan penelitian lapangan tentang “Gambaran Daya Tarik Investasi” di masing-masing daerah yang disajikan secara terpisah dari laporan ini, dan kedua, temuan penelitian lapangan pola pola daya tarik investasi daerah yang merupakan sintesis dari penelitian di 20 daerah penelitian lapangan. Penyajian laporan penelitian di 20 daerah penelitian lapangan secara tersendiri untuk memberikan gambaran spesifik mengenai hasil penelitian lapangan di daerah daerah yang memiliki struktur ekonomi dengan basis usaha sektoral dominan yang mewakili daerah Perkebunan, Kehutanan, Perikanan, Pertambangan, Industri Pengolahan (Manufaktur), dan Perdagangan.

#### C.1. Gambaran Daya Tarik Investasi Daerah Kabupaten / Kota Secara Umum

Walaupun terdapat beberapa kekhususan daya tarik investasi masing-masing daerah (dijabarkan pada bagian C.2. di bawah); namun ditemukan pula sejumlah persoalan yang relatif sama yang dihadapi oleh para pelaku usaha dari sektor-sektor usaha yang berbeda di sejumlah daerah. Indikasi persoalan yang sama ini pertama-tama terlihat dari hasil pembobotan faktor-faktor, variabel, dan indikator yang digunakan untuk pemeringkatan daya tarik investasi kabupaten/ kota. Dari hasil pembobotan faktor-faktor, variabel, dan indikator-indikator oleh para pengusaha terlihat bahwa faktor-faktor yang tergabung dalam policy variable masih ditempatkan lebih penting daripada faktor-faktor yang tergabung dalam *endowment variable*. Hal ini menunjukkan bahwa daya tarik investasi daerah-daerah di Indonesia masih berada dalam kondisi yang belum normal atau belum ideal. Dalam keadaan normal, faktor-faktor yang tergabung dalam *endowment variable* semestinya mendapat bobot yang lebih besar dalam pertimbangan untuk keputusan berinvestasi. Bila faktor-

*the factor of physical infrastructure compared to the factors of Institution and Socio-political and Cultural Condition at this time of rating simply indicates that the condition of investment attractiveness of regions in Indonesia is not normal yet. If the investment attractiveness of the regions is under the normal condition, it is likely that more weight will be given to the factors of Regional Economy, Physical Infrastructure, and Labor and Productivity. Thus in terms of long term purpose and prospect, these regions need to augment and improve their physical infrastructure.*

### C. DESCRIPTION OF ATTRACTIVENESS OF REGENCIES/CITIES TO INVESTMENT

*The result of field survey in 20 areas is presented in two parts. First is the detail of the field survey report regarding the “Description of Investment Attractiveness” for each area which is presented as Appendix; and second, the synthesis for the finding of field survey in said 20 field survey areas that is regarded as pattern of regional investment attractiveness, which is presented below. Separate presentation of report in 20 field survey areas is intended to give specific illustration on the result of field survey for each research area, following the economic structure dominant in specific areas representing the fields of Plantation, Forestry, Fishery, Mining, Manufacture Industry and Trade.*

#### C.1. General Description on Attractiveness of Regencies/Cities to Investment

*Although each area possesses several special attributes on attractiveness to investment (as explained below, see item C.2.), there are also some relatively similar problems faced by business community from various business sectors in some areas. These problems have actually been indicated in the process of weighing of factors, variables and indicator used to determine attractiveness of regencies/cities to investment. Based on the weighing of factors, variables and indicators done by the business community, it shows that the factors under the policy variable are still more important than the factors under endowment variable. This indicates that the attractiveness of regions in Indonesia to investment is still not under a normal or ideal condition. When it is in normal condition, the factors under the endowment variable shall receive higher weight in investment decision-making. If the institutional factor, security factor, and other factors under the policy variable are in*



faktor kelembagaan, keamanan dan faktor-faktor policy variable lainnya yang dimiliki oleh daerah-daerah di Indonesia sudah normal, seharusnya dalam mengambil keputusan untuk berinvestasi, pertama-tama yang dilihat oleh investor adalah pada potensi ekonomi yang dimiliki oleh daerah, infrastruktur, dan ketenagakerjaan (*endowment variable*).

Dari penelitian ini diketahui pula bahwa secara umum daerah kabupaten / kota di Indonesia, masih menghadapi beberapa masalah sehubungan dengan daya tariknya terhadap investasi. Kendala-kendala tersebut terlihat dari pernyataan atau jawaban 463 responden pelaku usaha di 20 daerah penelitian lapangan, dimana, 42% menyatakan bahwa kepastian hukum masih rendah, dan bahkan 11,2% responden menyatakan sangat tidak baik. Persoalan lainnya adalah dalam hal kualitas pelayanan birokrasi, dimana 48,2% responden menilai tidak baik dan 13,4% responden menyatakan sangat tidak baik.

Data tersebut menunjukkan bahwa praktik pemerintahan yang terkait dengan kepastian hukum dan pelayanan birokrasi masih jauh dari harapan para pelaku usaha. Bila dikaitkan dengan kualitas kebijakan formal peraturan daerah yang dianalisis dari 134 Kabupaten/ Kota yang menunjukkan 22,7% Perda tidak mengatur dengan jelas tentang standar pelayanan usaha (prosedur, waktu, tarif, dll.); maka wajar bila birokrasi pelayanan usaha tidak memenuhi harapan pelaku usaha karena di tingkat aturan formal pun hal hal terkait dengan pelayanan usaha sudah menunjukkan distorsinya terhadap aktivitas usaha.

## C.2. Pola Pola Daya Tarik Investasi

Dalam penelitian lapangan di 20 Kabupaten/Kota untuk memahami pola-pola daya tarik investasi daerah berdasar sektor usaha dominan, ditemukan beberapa persoalan-persoalan khusus yang dihadapi oleh masing-masing sektor usaha. Hal ini terjadi karena setiap sektor usaha mempunyai karakteristik yang berbeda antara sektor usaha yang satu dengan sektor usaha yang lainnya.

### C.2.1. Sektor Usaha Manufaktur Lahan Subur untuk Pungutan Liar

Sebagian besar pelaku usaha manufaktur mengungkapkan bahwa pelayanan birokrasi oleh pemerintah daerah (pemda) di sejumlah daerah mereka rasa masih kurang baik. Hal ini paling banyak dirasakan oleh 80% responden pengusaha manufaktur dari Kab. Serang, dan 20% responden di Kota Kediri yang menyatakan pungutan tidak resmi di lingkungan birokrasi cukup tinggi. Kedua daerah tersebut merupakan daerah berbasis manufaktur. Hal serupa juga dialami oleh para pengusaha manufaktur yang menyebar

*normal condition in the regions of Indonesia, the investors will pay more attention on the variables of economic potential, physical infrastructure and labor (endowment variables) existing in an area in making decision about investment.*

*This survey also discovers that in general, the regencies/cities in Indonesia still face some problems in attracting investment. The obstacle, as affirmed by 42% of 463 respondents (businessmen) from 20 field survey areas, remains law certainty in such an extent that there are even 11.2% of the total respondents saying that such factor is extremely poor. Another problem is the quality of government service, where 48.2% respondents regard it as poor and 13.4% respondents as extremely poor.*

*Said data simply show that the quality of government officials responsible of providing law certainty and government service is still far from business community's expectation. In terms of formal policies such as quality of regional regulations as analysed from 134 Regencies/Cities, it shows that 22.7% of Regional Regulations failed to provide clear provisions on standard of business service (procedure, duration, cost, etc.). This means that poor business service takes its root from the formal regulations.*

## C.2. Patterns of Investment Attractiveness

*As revealed by the field survey in 20 Regencies/Cities, specific business sector faces specific problems. This is attributed mainly on the consideration that each business sector has its own characteristics different from others.*

### C.2.1. Manufacturing Sector as Vulnerable Ground for Illegal Levy

*Majority of the manufacturers reveal that the services of regional governments in several areas are still quite poor. This assessment is based from the experience of 80% respondents (manufacturers) from Serang Regency and 20% respondents from Kediri City who state that illegal levy within the bureaucracy is quite high. Both areas are manufacture-center areas. The same thing happens to the manufacturers from another 18 regions. In addition to high illegal levy in*



di 18 daerah lainnya. Selain tingginya biaya tidak resmi dalam pelayanan birokrasi, ketidakpuasan akan pelayanan birokrasi juga dirasakan akibat kurangnya kepastian waktu, kepastian biaya, prosedur yang berbelit-belit dalam proses pelayanan birokrasi, seperti dalam pelayanan perizinan pendirian usaha baru, registrasi ulang, dan sebagainya.

Di samping pungutan tidak resmi dalam tubuh birokrasi para pengusaha manufaktur ini juga banyak yang menjadi sasaran pungutan tidak resmi oleh pihak-pihak di luar birokrasi, yang terjadi di lingkungan kegiatan usaha mereka. Pungutan tidak resmi oleh aparat keamanan paling banyak dialami oleh para pengusaha manufaktur di Kab. Sidoharjo yaitu sebesar 36,4% responden. Pungutan tidak resmi yang dilakukan oleh sekelompok orang yang mengatasnamakan organisasi sosial kemasyarakatan yang dialami oleh 70% Responden di Kab. Serang, 35,2% Responden di Kota Kediri, 27,2% responden di Kab. Sidoharjo. Sedangkan pungutan-pungutan tidak resmi lainnya biasanya dilakukan oleh kelompok pemuda kampung, preman dan sebagainya. Pungutan tersebut dilakukan mulai dengan cara halus, seperti permintaan sumbangan hingga menggunakan intimidasi baik langsung maupun tak langsung. Di Kab. Serang misalnya terdapat sekelompok orang yang dengan nama tertentu yang secara reguler sebulan sekali, atau beberapa minggu sekali mendatangi pabrik-pabrik untuk meminta “uang keamanan”.

### C.2.2. Diskriminasi dan Transparansi Pelayanan Publik terhadap Sektor Usaha Perdagangan dan Jasa

Sebagian besar pelaku usaha sektor perdagangan dan jasa merasa sebagai “korban” perlakuan diskriminatif dari kebijakan pemerintah daerah di bidang perizinan usaha. Perlakuan diskriminatif dalam pengurusan perizinan ini dirasakan paling tidak oleh para pelaku usaha jasa perdagangan dan jasa pariwisata di Kota Denpasar dengan modal menengah. Banyak daerah mengambil kebijakan dengan menempatkan pencapaian retribusi sebagai target Pendapatan Asli Daerah (PAD) dalam penyusunan APBD tahunan. Karena jumlah pendapatan dari retribusi perizinan ini telah ditetapkan sebagai target, dengan demikian untuk dapat dinyatakan berhasil dalam pelaksana pelayanan perizinan adalah dengan terpenuhi atau terlampauinya target yang telah ditetapkan. Akibat dari akses pelayanan perizinan terhadap kalangan dunia usaha yang cenderung berpihak dan lebih menguntungkan pada yang mampu membayar biaya perizinan, maka terjadi kecenderungan untuk mendiskriminasi kelompok yang kurang mampu. Oleh karenanya, golongan lemah (UKM) cenderung

*exchange for government service, dissatisfaction toward government service is also common because of laxity in terms of time, unclear tariff, and complicated procedures in providing government service, such as issuance of permits for new business establishment, re-registration, and so on.*

*In addition to the illegal levy within the bureaucracy, manufacturers are also the targets of illegal levy outside the bureaucracy operating within their business areas. Most manufacturers or around 36% respondents from Sidoharjo Regency have been prey to illegal levy from security officers (police). Whereas 70% of the respondents from Serang Regency, 35.2% respondents from Kediri City and 27.2% respondents from Sidoharjo Regency have experienced illegal levy from a group of people who are believed to be part of community organization. While, other illegal levies are usually maintained by a group of rural youth, gangsters and so on. The practice of illegal levy is being done in a subtle way, like soliciting for donation to direct or indirect use of intimidation. For example, in Serang Regency a group of people under certain name have been visiting factories once a month or several times a week to ask for “security fee”.*

### C.2.2. Discrimination and Transparency of Public Service for Trade and Service Sector

*Most businessmen from trade and service sector admitted to fall “victims” to discrimination with regards to regional government policy on issuance of business permit. The medium-scale entrepreneurs in trade and tourism sector from Denpasar City have experienced such discriminating practice in processing business permit. The difficulty in the processing of business permit is related to the fact that several regions have been introducing policies putting retribution collection as the main source of revenue to increase Original Regional Revenue (PAD) in the preparation of annual Regional Budget (APBD). Certain target of revenue has to be secured from the issuance of permit that any action seems to be directed to ensure achievement of said target. As a result, only those who can afford the payment can secure business permit, while the less privileged groups are discriminated. The small-scale business groups (UKM) are receiving inadequate attention*

kurang mendapat perhatian dari organisasi pemerintah, karena golongan ini dipandang sebagai golongan yang kurang menguntungkan.

Selain tingginya biaya, diskriminasi juga dirasakan karena adanya perbedaan pelayanan diantara pengusaha yang dekat dengan kekuasaan dengan pengusaha yang tidak mempunyai hubungan dengan aparat. Persoalan yang juga banyak dialami oleh pelaku usaha jasa konstruksi di beberapa daerah adalah masalah transparansi tender untuk mendapatkan proyek khususnya proyek-proyek pemerintah. Tender dilakukan secara tidak transparan dan penuh diwarnai dengan unsur KKN, dan kurang mempertimbangkan kualifikasi peserta tender. Kedekatan dengan penguasa sangat berpengaruh terhadap keberhasilan untuk mendapatkan tender.

*from government official, for these groups are considered insignificant in terms of target fulfilment.*

*Besides high tariff, discrimination is also evident from the fact that service is being provided based on proximity in terms of relationship with government officials. As a common experience, businessmen in the construction sector from several areas are facing transparency problem when bidding for a particular government project. The bidding is not being conducted in a transparent manner thus highly prone to corruption, collusion and nepotism, disregarding the qualifications of bidders. Close relationship to officials influences very much the success in bidding.*

## **DISKRIMINASI PELAYANAN PERIZINAN USAHA OLEH BIROKRASI PEMERINTAH DAERAH**

### ***DISCRIMINATION IN THE ISSUANCE OF BUSINESS PERMIT BY REGIONAL GOVERNMENT***

Untuk mengatasi dampak negatif dari pembangunan pemerintah mengeluarkan berbagai kebijakan yang dituangkan dalam berbagai bentuk hukum dan peraturan, yang salah satu pelaksanaannya adalah dalam instrumen perizinan. Melalui instrumen perizinan ini, pemerintahlah yang berhak menentukan kegiatan mana yang boleh dilakukan dan kegiatan mana yang tidak boleh dilakukan oleh masyarakat dan swasta. Dengan demikian perizinan dengan segala persyaratannya merupakan instrumen atau mekanisme pengendalian oleh pemerintah dengan tujuan agar tidak terjadi kegagalan pasar yang disebabkan oleh eksternalitas negatif barang publik, dan asimetri informasi.

Karena pemberian izin tersebut melekat pada fungsi dan kewenangan pemerintah, artinya perizinan merupakan monopoli dari pemerintah. Di Indonesia, sebagai salah satu keputusan administratif perizinan dikeluarkan oleh pemerintah pada seluruh tingkatan (pemerintah pusat dan pemerintah daerah). Dalam hal-hal tertentu yang berdampak pada publik - izin mendirikan bangunan, izin trayek, izin usaha dalam skala tertentu - dikeluarkan oleh pemerintah daerah. Dengan demikian peranan pemerintah daerah dalam menetapkan dan melaksanakan kebijakan perizinan yang berkaitan dengan kebutuhan dasar masyarakat sangat menentukan. Oleh karenanya semenjak otonomi daerah diterapkan pada awal tahun 2001 lalu, salah satu bentuk kebijakan yang populer di tingkat daerah adalah mengenai perizinan. Hal yang nyata terasa dialami oleh masyarakat dan pelaku usaha adalah semakin banyaknya izin yang harus mereka miliki apabila akan melakukan suatu kegiatan.

Paralel dengan berbagai perizinan yang harus dimiliki itu adalah banyaknya keluhan akibat ketidakpuasan terhadap kualitas pelayanan oleh aparat yang berwenang memberikan izin, seperti sulitnya mendapatkan izin, prosedur yang berbelit-belit, tingginya biaya yang harus dikeluarkan, sampai dengan diskriminasi terhadap golongan tertentu dan lain-lain. Salah satu contoh terjadinya diskriminasi pelayanan perizinan diungkapkan oleh dunia usaha di Kota Denpasar, yang merasa bahwa pelayanan perizinan di Kota ini cenderung memberatkan golongan pengusaha menengah dan kecil. Perizinan lebih mudah diperoleh oleh golongan pengusaha dengan modal besar.

Persoalan di atas dapat dipahami pertama-tama dengan mengungkapkan lebih jauh latar belakang birokrasi pemerintah dan selanjutnya menelusuri bagaimana

*To overcome the negative effects of development, government issues a number of policies, in the form of various laws and regulations, the implementation of which requires, among others, permit instrument. Through this instrument, the government can determine which public or private company activity is legal and which is illegal. So business permits with all their requirements are government instrument and control mechanism to avoid market failure causing negative externalities in the provision of public goods, and information deviation.*

*Because business permit is connected to government authority and function, it is actually government monopoly. In Indonesia, as an administrative decree, business permit is issued by all levels of government (regional and national governments). In some cases, regional government is responsible for the issuance of permits on several activities related to public interests such as building construction permit, transportation permit, and business permit for certain scale of business. Thus, the role of regional government in deciding and implementing policy on permit related to the provision of people's basic needs is very significant. That is why, since the implementation of regional autonomy in 2001, one of popular regional policies is business permit. What is the result so far is that individuals and businessmen complain about so many permits they must obtain if they intend to set up a business.*

*Parallel to the required business permit is a complaint over dissatisfaction to the service quality by authorized government official who is in charge of issuing permit, such as difficulties in securing permit, complicated procedure and high cost of permit, and discrimination to certain group. An example of discrimination in business permit is revealed by certain business group in Denpasar, who feel that business permit in the city tends to discriminate small and middle-scale businessmen. It is easier to get business permit for big corporation.*

*The above issues are easier to explain if we understand the logic behind the bureaucracy leading it to show some specific attitudes in the issuance of business*

pemahaman pemda akan kedudukan perizinan. Perlu dipahami bahwa dalam organisasi pelayanan publik terdapat dimensi birokratik-administratif, yang diantaranya mencakup : kekuatan prosedur; pemerataan perlakuan; jarak sosial antara klien dan petugas; ketersediaan saluran untuk menyampaikan perasaan tidak puas; latar belakang pandangan petugas; serta kebijakan kepegawaian. Berkaitan dengan pelayanan umum di bidang perizinan yang dilakukan oleh birokrasi, ada dua masalah yang dapat menjadi sumber kegagalan pemerintah yang berakibat ketidakpuasan pihak yang akan memperoleh perizinan tersebut. Pertama, adanya kesulitan untuk menilai keberhasilan pelayanan umum, dan kedua, masalah pelayanan umum oleh birokrasi yang bersifat monopolistik.

Salah satu karakteristik dari birokrasi monopolistik yang ditetapkan oleh peraturan, menurut beberapa studi ada kecenderungan untuk memperbesar anggaran (Niskanen, 1971). Birokrasi sebagaimana orang pada umumnya, adalah pihak yang memaksimalkan kepuasannya, yaitu gaji, jumlah karyawan, reputasi, dan status sosial. Karena utilitas birokrasi berkaitan dengan besarnya anggaran pemerintah, maka seorang birokrat yang berusaha mencapai kepuasan maksimum, berarti juga akan memaksimalkan atau memperbesar anggaran pemerintah. Untuk memperbesar anggaran pemerintahan yang biasanya dilakukan dengan ekspansi birokrasi pelayanan umum dan memaksimalkan pemborosan ((McKenzei, 1984). Adapun perluasan cakupan pelayanan umum dilakukan dengan cara memperbanyak prosedur (over regulated) atau memasukkan kegiatan ke dalam lingkup pekerjaan birokrasi yang sebenarnya pekerjaan tersebut dapat dilakukan oleh pihak lain atau ekspansi monopolistik. Hal ini barangkali merupakan akar persoalan terjadinya ketidak puasan para pencari izin (pengusaha) yang menganggap bahwa pelayanan perizinan banyak prosedur dan berbelit-belit.

Selanjutnya konsekuensi dari prosedur yang panjang adalah jasa pelayanan yang diminta setiap tahapan berupa biaya pelayanan yang harus dibayar oleh pihak pengusaha. Artinya bahwa semakin panjang jalur birokrasi atau prosedur yang harus dilalui, semakin besar pula biaya yang harus dikeluarkan. Hal ini terjadi juga karena kecenderungan kedua dari birokrasi yang monopolistik yaitu melakukan pemborosan. Pemborosan yang dilakukan oleh birokrat adalah dengan memperbesar biaya perunit pelayanan atau menambah jumlah pegawai untuk menjalankan fungsi pelayanan umum. Pemborosan ini dari sisi peminta pelayanan perizinan merupakan tambahan biaya yang lebih mahal dan harus dibayar atau dikeluarkan oleh pengusaha.

Tingginya biaya tersebut masih dalam kerangka formal (sebagaimana diatur oleh birokrasi perizinan) tetapi belum diperhitungkan faktor perilaku manusia atau aparat yang berwenang memberikan pelayanan perizinan tersebut. Birokrasi pemerintahan sebagai sebuah organisasi terdiri dari elemen-elemen atau individu-individu yang yaitu manusia (pejabat, petugas pelayanan, dan lain sebagainya). Tidak dapat dipungkiri bahwa dalam diri setiap individu tersebut mempunyai ekspektasi, interest atau tujuan-tujuan tertentu secara sendiri-sendiri. Dengan demikian penyalahgunaan wewenang atau jabatan - korupsi, kolusi, ataupun nepotisme - bisa saja terjadi. Jika terjadi penyalahgunaan jabatan oleh petugas pelayan perizinan, tentu saja biaya yang dikeluarkan untuk pengurusan perizinan tersebut akan menjadi semakin mahal, dan mungkin juga akan terjadi diskriminasi dalam pelayanan.

Ditinjau dari pemahaman pemda akan kedudukan perizinan di era otonomi, ada kecenderungan yang kuat bahwa perizinan yang seharusnya ditempatkan sebagai salah satu instrumen pengendalian, oleh beberapa daerah dipandang mempunyai posisi yang penting. Yakni, pada satu sisi dipandang sebagai perwujudan dari kewenangan daerah (otonomi secara politik), dan pada sisi yang lainnya dijadikan sebagai sumber pendapatan bagi daerah (otonomi secara

*permit. In public service organization, there is a bureaucracy administration dimension that includes consistency of procedure, equal treatment for all, government official-client social gap, access to channel customer dissatisfactions, government official's attitudinal background, and employment policy. In line with public business permit service provided by government officials, there are two issues that are probably the cause of government failure giving dissatisfactions to the public who seek business permit service. First, there is difficulty in measuring public service success, and second, the monopoly of the bureaucracy in providing public service.*

*One of the characteristics of monopolistic bureaucracy stipulated in regulation, according to a number of studies, is a tendency to mark up the budget (Niskanen, 1971). Bureaucracy, just like other system, is run by people whose intention is to maximize their satisfaction, namely salary, employment size, reputation and social status. Since the value of bureaucracy is relative to the amount of government budget, a government in its attempt to maximize satisfaction tends to also mark up government budget. Generally, government has a tendency to expand public service bureaucracy and maximize inefficiency (Mc Kenzei 1984). Public service expansion is conducted through imposition of over regulated procedure or putting unnecessary activities, which are supposed to be other party's job. This may be the main factor of dissatisfaction of businessmen seeking for business permit who consider them as inefficient procedures.*

*As a result of long and winding procedures, public service needed in every level becomes business service cost for the businessmen who have to pay for it. It means that the longer the bureaucracy lines and procedures, the bigger the cost the businessmen have to pay. This is also possible because of the second tendency of monopolistic bureaucracy namely inefficiency. Government creates efficiency by marking up every unit of service cost or by maximizing a number of employees to provide public service. From the point of view of business permit seekers, this is an extra cost, which is more expensive than they are supposed to pay.*

*The high cost contained in the formal regulation (as it is regulated in government regulation) is one thing, while the behavior of government official in charge of issuing permit is another thing. Government bureaucracy as an organization consists of elements and individuals who are human (official, public service official etc). It is undeniable that every individual has his or her expectation, interest and desire. And so, government officials tend to abuse power through corruption, collusion, and nepotism. If there is an abuse of power, of course, there is an extra cost and it will be more expensive to get a permit, and service discrimination is likely to happen.*

*Considering that regional government's attitude toward business permit is important in the era of regional autonomy, there is a strong tendency that business permit should be placed as one of the control instruments, and some regions have placed it in a very important position. In one side it is considered as a manifestation of regional authority, on the other side, it is considered as revenue source. In line with the second view on the importance of*



ekonomis). Berkaitan dengan pandangan kedua yang terjadi adalah adanya kesulitan dalam menentukan keberhasilan pelayanan umum di bidang perizinan. Meskipun logika perusahaan swasta tidak dapat diterapkan pada birokrasi penyedia pelayanan perizinan, dalam praktik sering dilakukan oleh banyak pemda, bahwa keberhasilan pelayanan perizinan dilihat dari jumlah izin yang dikeluarkan dan retribusi yang diterima. Seringkali pejabat publik mengaitkan pemberian izin dengan retribusi. Pencapaian retribusi ditetapkan sebagai target Pendapatan Asli Daerah (PAD) dalam penyusunan APBD tahunan. Jumlah pendapatan dari retribusi perizinan ini telah ditetapkan sebagai target. Dengan demikian untuk dapat dinyatakan berhasil, birokrasi pelaksana pelayanan perizinan harus dapat memenuhi atau bahkan lebih besar dari target yang telah ditetapkan. Target menjadi lebih penting dari pada kualitas pelayanan yang diberikan, dan fungsi utama dari pemberian izin tersebut, seperti untuk mengadakan pembinaan, pengawasan, pengendalian dan lainnya.

Selanjutnya dalam konteks perizinan usaha, masyarakat dan dunia usaha adalah pelanggan perizinan. Dengan kata lain untuk dapat melakukan kegiatan usaha, seseorang harus mengantongi sejumlah perizinan. Idealnya sebagai pelanggan, masyarakat atau dunia usaha dapat mengajukan keluhan atas ketidakpuasan pelayanan perizinan yang diberikan oleh pemda. Persoalannya, tidak banyak daerah yang menyediakan institusi yang kredibel untuk menampung keluhan dunia usaha ini. Jika ada, biasanya institusi tersebut merupakan bagian dari, atau sub-unit dari dinas pemroses izin. Tidak efektifnya mekanisme keluhan mendorong dua pilihan yang akan dilakukan oleh para pelaku usaha berkaitan dengan perizinan usaha. Pertama, yaitu melakukan kompromi – baik secara sukarela atau terpaksa – dengan sistem yang sebenarnya tidak disukainya. Kedua memilih untuk keluar dari sistem tersebut. Apabila pilihannya adalah berkompromi dengan sistem yang ada, maka konsekuensinya harus mengeluarkan biaya ekstra, yang merupakan ekonomi biaya tinggi. Hal ini tentu saja akan lebih mudah dilakukan oleh pelaku usaha dengan modal yang besar, sebaliknya akan dirasakan berat oleh pelaku usaha dengan modal pas-pasan atau kecil - seperti yang dikeluhkan oleh kalangan pengusaha di Kota Denpasar. Jika tidak sanggup membayar, maka pilihan kedua yang akan ditempuh, yaitu keluar dari sistem. Konsekuensinya adalah kegiatan usaha yang dilakukan dikategorikan ke dalam sektor informal. Sebagai usaha sektor informal tentu saja akan banyak mengalami kesulitan dalam pengembangan usahanya. Dan di sisi lain dapat mengancam kegiatan sosial ekonomi, serta kesulitan pemerintah dalam melakukan pengawasan, pembinaan dan sebagainya. Dengan kata lain telah terjadi kegagalan dalam fungsi instrumen perizinan.

Sampai di sini, tampaknya upaya-upaya pemerintah untuk mengatasi ketidak-seimbangan pelayanan publik belum berhasil dengan baik. Faktor-faktor ekonomis seperti bias investasi, bias kualitas, bias harga, dan bias birokrasi membuat pelayanan publik telah menjadi terlalu mahal bagi golongan miskin. Akibat dari akses pelayanan publik (perizinan) yang lebih bias dan menguntungkan pada golongan menengah atas, sehingga muncul kecenderungan untuk mendiskriminasi kelompok masyarakat dengan modal kurang yang seharusnya mendapatkan bantuan lebih banyak dari mereka. Hal ini terjadi karena pertimbangan-pertimbangan rasionalitas dan efisiensi yang sangat mendominasi pencapaian tujuan organisasi atau unsur-unsur tertentu dalam organisasi (baca oknum) pelayanan publik cenderung untuk memilih kelompok sasaran yang mereka pandang paling menguntungkan buat pencapaian tujuan organisasi. Oleh karenanya, golongan lemah cenderung selalu kurang mendapat perhatian dari organisasi pemerintah, karena golongan ini dipandang sebagai golongan rawan yang kurang menguntungkan.

*public permit, it is very difficult to measure the success of public business service. Even though private corporation procedure is no comparison to public service institution, in reality, oftentimes, as it happens in some regional governments, the success of public service is indicated by the number of permits issued and revenue that comes to the government cash flow. Revenue target is considered as Original Regional Revenue (PAD) in the regional budget (APBD). It is the revenue from issuance of this permit that is the target of permit itself, and not the service for which the permit is issued. And to make this successful, government official in charge of issuing business permit must fulfill the target or surpass it. Target becomes more important than public service quality or the main function of permit, namely development, supervision, control, etc.*

*In the context of business permit, individuals and businessmen are supposed to be treated as customers. Ideally, as customers, individuals and businessmen may file a complaint over their dissatisfaction about poor service in getting business permit from local government. The problem is that many regions do not provide any credible institution to handle these complaints. If there is such an institution, usually it is part or sub-unit of an institution in charge of issuing certain business permit. Inefficiency in complaint mechanism seems to lead businessmen to two options to get business permit. First, by making a compromise -voluntarily or involuntarily- with the system they don't like, or to withdraw from the system. If the option is to compromise with the system, consequently, there must be an extra cost and this is considered as high cost economy. This, of course, will not be a problem for big companies, while on the contrary this is a problem for small-scale industry such as complained by businessmen in Denpasar. If they cannot afford it, they tend to take the second option; they choose to go out of the system. Consequently, their business activities will be classified as informal business. As informal business it is not easy to develop. This makes it difficult for both government and businessmen to develop and to control their businesses.*

*Up to this point, all government efforts in resolving lopsided public service failed. Economic factors like unfavorable investment climate, low service quality, fluctuating price, and inefficient bureaucracy have made the public service expensive for poor people. This can be an advantage for big businessmen but it creates a tendency to discriminate small-scale businessmen who are supposed to get more assistance from them. This is caused by a kind of "rational interest" of government organization to select the target group who benefits the organization. Consequently, government tends to marginalize the unfortunate because they are considered as a group that doesn't give benefit for the government.*



### C.2.3. Benturan Sosial Budaya pada Sektor Usaha Perkebunan

Karakteristik sektor usaha perkebunan adalah bahwa usaha ini membutuhkan penguasaan lahan usaha berupa tanah yang luas membuka usaha. Persoalan yang banyak muncul kemudian adalah berkaitan dengan masalah penguasaan tanah tersebut. Kebijakan pemerintah dalam hal pertanahan (politik pertanahan) hingga saat ini masih menyisakan sejumlah persoalan, khususnya menyangkut status tanah. Di Indonesia terdapat beberapa status tanah, seperti tanah negara dengan status Hak Guna Usaha, Hak Bangun, dan Hak Milik, sementara tanah adat yang dikuasai oleh pemangku hukum adat masyarakat statusnya belum diakui dalam UU Agraria. Para pelaku usaha di sektor perkebunan sering berhadapan dengan masalah status tanah yang mereka kuasai. Persoalan ini biasanya muncul apabila tanah yang mereka kuasai diklaim oleh pihak-pihak tertentu sebagai tanah adat sebagaimana diakui oleh masyarakat sekitarnya. Disini kemudian terjadi sengketa status tanah yang berkaitan dengan penguasaan tanah adat atau yang disebut dengan tanah ulayat yang kemudian mengganggu aktivitas usaha perkebunan.

Sebagaimana diungkapkan oleh pengusaha perkebunan di Kab. Manokwari, Pinrang, dan Barito Utara, mereka pernah mengalami gangguan akibat lahan usaha yang mereka kuasai diakui sebagai tanah adat oleh masyarakat sekitar. Selain menyangkut tanah adat, permasalahan yang sering muncul adalah warisan persoalan lama yang tidak terselesaikan dengan baik. Masalah ganti rugi yang dirasa tidak memadai, atau keputusan sepihak oleh pemerintah di masa lalu juga sering menghambat usaha di bidang perkebunan ini. Dengan jatuhnya regim orde baru dan *euphoria* reformasi yang berlebihan, akibatnya sering terjadi gangguan seperti tuntutan ganti rugi oleh beberapa kelompok warga / orang yang masing-masing kelompok bergantian sama-sama mengaku sebagai pemilik tanah di masa lalu. Hal ini terjadi berulang kali dengan kelompok yang berbeda. Belum lagi gangguan keamanan seperti penjarahan, pengrusakan tanaman, pengambilalihan secara paksa, dan penguasaan lahan hingga pendudukan lahan oleh masyarakat sekitar. Hal ini pernah dialami oleh perusahaan perkebunan di Kab. Pinrang, Sulawesi Selatan, dan Barito Utara, Kalimantan Tengah.

Selain persoalan dengan penguasaan lahan usaha, permasalahan yang dihadapi oleh pengusaha perkebunan juga dengan hubungan antara Inti dengan Plasma. Persoalan yang biasa muncul adalah yang berkaitan dengan penetapan harga komoditi. Di sini seringkali campur tangan pemerintah justru sering kali menimbulkan ketidakpuasan salah satu pihak. Akibat

### C.2.3. Socio-Cultural Block In Plantation Business Sector

*It is a characteristic of plantation business sector to control a large area of land to operate a business. Many of the problems that usually surface afterwards are related to control over particular land. The government policies in relation to land (agrarian policy) are still weak in addressing all problems related to land ownership and control. There are several land statuses in Indonesia, like state land with Right to Cultivate, Right to Build, and Right to Own, while customary land as controlled by customary law authority holder has not got yet any clear legal status under the Agrarian Law. This insufficient legal framework simply presents serious problem to businessmen in plantation sector. This usually occurs when suddenly their controlled land is claimed to be customary land by certain parties. Afterwards, dispute is inevitable, and its settlement requires times and attention, which is to say that it is really disturbing.*

*Plantation businessmen in Manokwari, Pinrang, and North Barito Regencies experience such a problem as their lands for business is claimed to be customary land by surrounding community. Aside from customary land, problems related to poor settlement of compensation at the beginning of the business came out as big concern, an old problem that is long been hidden during the New Order regime. Unfair compensation or lop-sided decision on compensation by government in the past often impedes business in the plantation sector. As the New Order regime falls and current reformation becomes so euphoric, demand for compensation becomes intense, and worst it is usually demanded by several groups of people, each of them submits claim as the owner of the disputed land. This happened for several times and with different groups. Security problems further add to the problems, such as robbery, plant destruction, forced take-over, to land occupation by surrounding interest group. Plantation companies in Pinrang, South Sulawesi Province, and North Barito, Central Kalimantan Province, experienced such cases.*

*In addition to the problem on land control, there is also a problem on the relations between the Core (Inti) and Periphery (Plasma) facing plantation businessmen. This is related to the pricing of commodity. Government interference does not seem to be the solution here as dissatisfaction heats up from both sides, simply*

dari ketidakpuasan tersebut kemudian malah memperumit keadaan dan mengganggu kelancaran aktivitas usaha sektor ini. Persoalan lain adalah masalah etos kerja yang masih rendah serta pengetahuan akan standar kualitas akan komoditi perkebunan dari masyarakat sekitar sebagai plasma dari pengusaha perkebunan. Seperti yang diungkapkan oleh pengusaha perkebunan kelapa sawit dan CPO di Barito Utara, yang seringkali dengan terpaksa harus membeli tandan buah segar kelapa sawit yang masih belum siap untuk diolah. Dari pihak penjual (plasma) melakukan ini karena terdesak oleh kebutuhan hidup.

Di era otonomi ini, dimana pemerintah daerah berupaya untuk mengenyot penerimaan PAD, di sektor perkebunan muncul pungutan-pungutan baru bari baik pajak maupun retribusi terhadap usaha perkebunan, seperti pajak produksi perkebunan di sejumlah daerah. Pungutan-pungutan tersebut selain tumpang tindih dengan pungutan PPN juga merupakan tambahan biaya yang mengakibatkan menurunnya daya saing komoditi perkebunan kita dibandingkan dengan negara lain.

*leading to complicated situation and unfavourable climate for business activities in this sector. Another problem is on poor work ethic and lack of knowledge on standard quality on plantation products as plasma of plantation business. As revealed by businessmen running coconut plantation and CPO in North Barito, forced purchasing of bunches of fresh oil palm still young for processing is usually the case. The sellers or people in plasma simply resort to this to support their lives.*

*In this autonomy era, where regional government is highly concerned on increasing Original Regional Revenue (PAD), there are new taxes and retribution imposed to plantation sector, such as plantation production tax imposed in several regions. Aside from the fact that they overlap with the Value Added Tax since the object of both is simply the same, those taxes and retribution create additional cost certainly leading to decreasing competitive advantage of our plantation products compared to other countries.*

## **MASYARAKAT ADAT, HAK ULAYAT DAN PENGAKUAN NEGARA**

### ***INDIGENOUS COMMUNITY, CUSTOMARY RIGHTS AND GOVERNMENT'S RECOGNITION***

Seiring terapan otonomi daerah (otda) dewasa ini, tuntutan sebagian warga daerah bagi pengakuan status aslinya sebagai masyarakat adat dan atribut hak ulayatnya tampak semakin asertif. Dan seakan bergayut sambut, di level nasional pun sejumlah perubahan regulasi menunjukkan arah kebijakan yang lebih akomodatif dibanding masa sebelumnya. Kalau pada periode pasca kemerdekaan sampai berakhirnya kekuasaan Orde Baru, sejumlah peraturan perundangan (UU No.05/60 tentang Agraria, UU No.11/67 tentang Pertambangan, UU No.05/67 tentang Kehutanan, dll) menyiratkan rendahnya tingkat pengakuan negara atas eksistensi dan hak masyarakat adat dan pada sisi lain begitu luasnya ruang hak menguasai negara (HMN); arah legislasi semasa Orde Reformasi ini, seperti terlihat dalam UU tentang Pemerintahan Daerah (UU No.22/99), UU tentang Kehutanan yang baru (UU No.41/99), sampai pada jabarannya seperti Kepmen Agraria No.05/99 tentang Penyelesaian Masalah Hak Ulayat, memperlihatkan tendensi yang relatif berubah.

Sedangkan di level daerah, sejauh ini ada satu-dua daerah (Kabupaten Manokwari, Propinsi Papua, dll.) yang sudah menerbitkan Perda atau SK Kepala Daerah sebagai pengakuan dan pengaturan eksistensi masyarakat adat setempat. Namun kebijakan itu umumnya bersifat parsial dan sektoral, dengan hanya mengatur sebagian hal dari hak masyarakat adat atau dalam kaitannya dengan hak ulayat atas bidang-bidang tertentu (hak ulayat atas hutan, atas tanah, dll). Tampaknya, sebuah Perda yang secara umum dan komprehensif mengakui dan mengatur keberadaan dan hak paripurna masyarakat adat masih perlu diperjuangkan masing-masing warga setempat.

Secara politiko-kultural, otda merupakan *turning point* bagi mengangkatnya identitas *genuine* masyarakat lokal, baik demi pemenuhan eksistensi diri sebagai suatu komunitas maupun agar lebih diperhatikan dalam setiap pembuatan keputusan negara. Diyakini bahwa setiap komunitas lokal memiliki kearifannya sendiri (*local wisdom*) dan sebagian

*In line with current application of regional autonomy, demands by some local communities for recognition of their original status as indigenous communities and for their customary rights are becoming firmer. And as if they are welcomed, some amendments to regulations at the national level indicate more accommodative policies compared to those applied in the past. After the declaration of independence until the end of the New Order's regime, some laws and regulations (e.g., Law No.05/60 regarding Agrarian, Law No.11/67 regarding Mining Affairs, Law No.05/67 regarding Forestry etc.) indicate low recognition by the state toward the existence and rights of indigenous community and wide control by the state; however during this Reform era, the legislative direction as indicated by Law No. 22/99 regarding Regional Government, and newly established Law No. 41/99 regarding Forestry, including its elucidation as specified in the Decisions of the Minister of Agrarian No. 05/99 regarding Settlement of Customary Rights, has indicated a relatively different tendency.*

*In regional level, there are so far one or two regions (Manokwari Regency, Papua Province etc.) that have issued Regional Regulations or Decisions of the Head of Region that recognize the existence and administration of local indigenous community. These policies, however, are generally fractional and sectoral as they only govern some parts of the indigenous community rights or pertaining to customary rights over certain areas (customary rights over forests, lands, etc.). It appears that a Regional Regulation that generally and comprehensively recognizes and manages the presence and full rights of indigenous community remains something to be fought for by local community.*

*From political and cultural perspective, regional autonomy is a turning point in promoting genuine identity of local community, so as to establish its individual existence as well as to receive better attention in making of state's resolution. It is believed that each local community has its own local wisdom and some rights to manage itself, so that*

#### C.2.4. Ketidakjelasan Kebijakan Sebelum dan Setelah Otonomi Daerah pada Sektor Usaha Pertambangan

Dunia usaha sektor pertambangan banyak mengalami permasalahan dengan ketidakjelasan maupun ketidak konsistenan berbagai peraturan baik di tingkat pusat maupun di daerah. Usaha pertambangan mengalami kendala dengan kebijakan atau aturan di tingkat pusat, seperti kontradiksi peraturan perundangan yang mengatur Lingkungan Hidup, Kehutanan (UU No.41 Tahun 1999), dan Pertambangan. Ketidakjelasan kebijakan juga terjadi akibat ketidakjelasan menyangkut siapa yang berwenang mengeluarkan izin operasi perusahaan pertambangan. Apakah berada di tangan pemerintah pusat, propinsi atau di kabupaten. Beberapa perusahaan pertambangan yang telah mengantongi izin operasi sebelum pelaksanaan otda dari pemerintah daerah propinsi, setelah pelaksanaan otda menghadapi persoalan dimana mereka harus mendapat perizinan baru dari pemerintah kabupaten. Bahkan ada kasus di yang dialami oleh salah satu perusahaan pertambangan batu marmer di wilayah

#### C.2.4. Unclear Policies Before and After Regional Autonomy in Mining Business Sector

*Business in mining sector has experienced lots of problems on lack of clarity and inconsistency of various laws both at national level and regional level. At the national level, policies and regulations in relation to Environment, Forestry (Law Number 41 Year 1999), and Mining are contradicting. Aside from policy and regulations, there is also confusion regarding which party has the authority to issue permit for mining company operation, whether it is the central, provincial or regency government. Some mining companies that obtained business permit from provincial government, now, along with the implementation of regional autonomy, are required to apply for a new permit from the regency government. In South Central Timor Regency, it was found out that a mining business permit of a marble mining company, just issued before the implementation of regional autonomy, was annulled by the Regional*

hak pengaturan atas dirinya, sehingga pada batas-batas domain kultural tersebut kehadiran negara (termasuk *local-state* sekali pun) hanya dibenarkan kalau berguna memproteksi dan mempromosi hak-hak komunitas tersebut.

Perlunya pengakuan negara (dan implikasinya terhadap degradasi hak menguasai negara/HMN) inilah yang menjadi bahan perdebatan panjang di negeri ini. Dalam era kolonial, melalui instrumen *Domein Verklaring* 1870, dibuat suatu regulasi yang cukup akomodatif terhadap kepentingan masyarakat adat. Masyarakat adat dipersilahkan terlebih dahulu menentukan hak kepemilikannya atas sejumlah tanah, sedangkan hak negara dibatasi karena hanya boleh menguasai atau memiliki sumber-sumber agraria yang tidak bertuan. Politik hukum agraria ini jelas memprioritaskan hak penduduk asli, lebih-lebih menyangkut hak membuka hutan (Maria Ruwiasuti, 1997).

Sebaliknya, sebagai yang telah disebut sepintas tadi, negara diposisikan sebagai pangkal dari hak atas sumber-sumber agraria, dengan hak menguasai negara (HMN) yang dominan. Hak negara ini mendapat pengabsahan legalnya dari sumber hukum tertinggi, yakni UUD 1945, di mana diatur bahwa "bumi, air dan kekayaan alam yang terkandung di dalamnya dikuasai oleh Negara dan dipergunakan untuk sebesar-besarnya kemakmuran rakyat" (Pasal 33 ayat 3). Di sini negara dipandang sebagai organisasi kekuasaan seluruh rakyat, sehingga bumi dan kekayaan alam yang terkandung di dalamnya itu pada tingkatan tertinggi dikuasai oleh negara.

Pengaruh pandangan legal tersebut menjelmah dalam substansi sejumlah regulasi nasional. Dalam UU yang mengatur pertambangan (UU No. 11/67), sebagai misal, ditegaskan bahwa "Semua bahan galian yang terdapat dalam wilayah hukum pertambangan Indonesia ..... adalah kekayaan nasional Bangsa Indonesia, dikuasai dan dipergunakan oleh Negara untuk sebesar-besarnya kemakmuran rakyat" (pasal 1). Artinya, meskipun di dalam tanah yang dikelola oleh masyarakat adat terdapat bahan-bahan galian, mereka tidak memiliki kewenangan untuk mempergunakannya karena hak menguasai seluruh bahan galian tambang itu ada pada negara.

Demikian pula dalam UU tentang Pokok Kehutanan

*in such cultural domain, the presence of a state (including local-state) is only justified when it is useful in protecting and promoting such community rights.*

*The requirement for a state's recognition (and its implication toward degradation of the state's rights to control) has become a long debate in this country. During the colonial era, through Domein Verklaring 1870, an accommodative regulation for the interests of indigenous community was made. Indigenous communities were welcomed in deciding their ownership rights over some lands, while the state's rights were limited to only control or own agrarian resources which were not controlled by local community. Said agrarian law clearly prioritizes the rights of local inhabitants, even their rights to clear forests (Maria Ruwiasuti, 1997).*

*On the other hand, as briefly stated earlier, the state is placed as the source of rights over agrarian resources, with dominant right to control. Such state's right receives legalization from the supreme law i.e., the 1945 Constitution, which governs that "land, water and natural wealth contained therein are controlled by the State and shall be optimally used for people's prosperity" (Article 33, paragraph 3). Here, the State is considered as a political organization of all people, that the land and natural wealth contained therein are controlled by the State at the highest extent.*

*The influence of such legal opinion is materialized in the substances of some national regulations. Law No. 11/67 on mining affairs, for instance, asserts that "All mines within the territory of Indonesian mining jurisdiction shall be the national assets of Indonesian people, which are controlled and optimally used by the State for people's prosperity" (Article 1). It means indigenous communities are not authorized to utilize mines in lands they manage because the right to control such mines lies in the hand of the State.*

*Similarly, Law No. 05/67 regarding Forestry Principles*



Kabupaten Timor Tengah Selatan, ijin operasi yang sudah dimiliki sejak sebelum pelaksanaan otda dicabut/dibatalkan secara sepihak oleh Pemda Kabupaten setempat sesaat setelah otda digulirkan.

Persoalan yang juga sering muncul adalah class action dan berbagai tudingan dari kalangan pemerhati lingkungan dan masyarakat sekitar yang menganggap bahwa usaha pertambangan ini merupakan biang keladi dari kerusakan lingkungan dan kelestarian lingkungan hidup di sekitarnya. Disamping permasalahan tersebut, sebagaimana usaha perkebunan, usaha pertambangan juga seringkali menghadapi persoalan dengan tanah ulayat, terutama berkaitan dengan kompensasi atau klaim ganti kerugian oleh masyarakat sekitar, yang menuding bahwa rusaknya lingkungan hidup sekitar daerah pertambangan sebagai akibat operasi penambangan yang mereka lakukan. Permasalahan ini muncul juga karena masih belum jelasnya siapa yang berkuasa atas tanah dan isinya.

#### C.2.5. Etos Kerja dan Budaya Masyarakat Kendala Pengembangan Sektor Usaha Peternakan

Pengembangan usaha peternakan (sapi) di beberapa daerah di Indonesia sebagian besar dilakukan masih dengan cara-cara tradisional, seperti contoh kasus di Kab. Timor Tengah Selatan (TTS), Nusa Tenggara Timur. Sistem pengetahuan masyarakat dalam pemeliharaan hewan yang masih tradisional ini sangat mempengaruhi produktivitas dan kualitas ternak yang dihasilkan.

*Government right after the implementation of regional autonomy without consultation to the permit holder.*

*There are also several cases of class action and accusations initiated by environmentalists and surrounding community who perceive that mining business as the source of environmental destruction and threat to environmental sustainability. Aside from above problems, mining business, a merely mining plantation business, has experienced a problem on customary land, especially related to compensation claimed by surrounding community. This problem occurs for a lack of clarity regarding which party has the authority over the land under dispute.*

#### C.2.5. Work Ethos and Culture as Obstacles in Developing Animal Husbandry Sector

*Most of cow husbandry businesses in several areas in Indonesia are run in traditional method, such as the case in South Central Timor (TTS), East Nusa Tenggara. Knowledge on animal husbandry is still very low that leads to low productivity and low quality cattle. Therefore, the value-added that goes to the farmers is likewise very low. For several times*

(UU No.05/67) —sebelum akhirnya direvisi menjadi UU No.41/99—ditetapkan pembagian status hutan sebagai hutan milik dan hutan negara (pasal 2). Hutan milik adalah hutan yang berada di atas tanah milik orang lain, dan selebihnya diklaim sebagai hutan negara. Menyangkut hutan yang dikuasai oleh masyarakat hukum adat, sebagaimana tertera dalam penjelasan umum UU ini, merupakan bagian dari hutan negara karena hutan-hutan itu tumbuh di atas tanah hak ulayat (bukan tanah hak milik orang). Pada konteks ini, maka HPH pun bisa saja diberikan di atas tanah-tanah hak ulayat milik masyarakat adat tersebut.

Arus balik —dengan mulai diperhatikannya eksistensi masyarakat adat, hak ulayat dan pengakuan negara atasnya—terjadi seiring berlakunya kebijakan otonomi pasca kejatuhan rezim Orde Baru. Di daerah, tendensi kelokalan dan bahkan pengerasan identitas mulai terlihat sosoknya; sementara pada level nasional perubahan regulasi mulai digagas (melahirkan UU No.22/99 tentang Pemerintahan Daerah, UU No.41/99 tentang Kehutanan, Permen Agraria No.05/99 tentang Pedoman Penyelesaian Masalah Hak Ulayat Masyarakat Hukum Adat, dsb).

Secara umum sejumlah UU ini lebih akomodatif terhadap eksistensi masyarakat adat dan hak ulayat, meski belum sepenuhnya bebas dari sifat penguasaan negara (HMN). UU No. 41/99, misalnya, malah mendefinisikan hutan adat (sebagai wujud penting kekuasaan masyarakat adat) sebagai “hutan negara yang berada dalam hutan

— which was eventually amended by Law No.41/99 — governs that forest status is defined into two i.e., ownership forest and state forests (Article 2). Ownership forests are those located in one’s land, and the rest is claimed as state forest. Forests that are controlled by indigenous community, as specified in the general elucidation of said Law, are parts of state’s forest because they are located in lands with customary rights (not lands belonging to individuals). In this context, the HPH (Rights to Manage Forest) may be issued for lands with customary rights belonging to indigenous community.

Transition — the greater attention to the indigenous communities, customary rights and the state’s recognition for them — is given along with the application of regional autonomy policy after the fall of the New Order’s regime. In the regions, tendency toward localization and even identity consolidation have started to emerge; while at the national level, amendments to regulations were initiated (producing Law No.22/99 regarding Regional Government, Law No.41/99 regarding Forestry, Decision of the Minister of Agrarian No.05/99 regarding Guidelines for Settlement of Customary Rights for Indigenous Community etc.)

Generally, those laws are more accommodative toward the existence of indigenous community and customary rights, although they are not fully free from state’s control. Law No. 41/99, for instance, defined traditional forests (as an important material for indigenous community’s power) as “state’s forest situated within customary forest”. The Decision of the Minister



Dengan demikian nilai tambah bagi peternak menjadi kurang baik. Beberapa kali pemerintah daerah mencoba untuk mengembangkan usaha ini secara lebih modern, tetapi gagal akibat berbenturan dengan sistem pengetahuan yang berkembang di masyarakat. Dalam usaha peternakan di TTS masih tumbuh hubungan yang bersifat patron clien antara peternak dan juragan. Kendala lain adalah masalah penyediaan bibit ternak dan ketersediaan pakan yang masih belum bisa diatasi. Selama ini usaha peternakan di TTS masih mengandalkan kemurahan alam sekitarnya.

Akibat dari pengelolaan yang masih tradisional yaitu melepaskan ternak di padang rumput terbuka bukan dengan sistem kandang, sehingga pengawasannya cukup sulit. Akibatnya pada usaha peternakan di Kab. TTS seringkali mendapat gangguan keamanan, yaitu pencurian hewan ternak. Pencurian ini menurut pengusaha peternakan juga di dasari oleh perasaan iri sesama peternak.

#### C.2.6. Kurang Pembinaan dan Muncul Pungutan-pungutan Baru pada Sektor Perikanan

Sektor usaha perikanan di berbagai daerah sentra penghasil ikan di Indonesia, semenjak pelaksanaan otonomi daerah banyak menanggung pungutan-pungutan baru, baik pajak maupun retribusi. Pungutan tersebut antara lain adalah Retribusi Tambat kapal ikan, Retribusi Tempat Pelelangan Ikan, Retribusi Izin Usaha Penangkapan Ikan. Beberapa pengusaha ikan dengan skala usaha sedang di Kota Sibolga dan di Kota Tegal, mengeluhkan rendahnya hasil tangkapan ikan mereka,

*the regional government has tried to transform this old way of doing business into a modern one, but still there is no transformation of knowledge within society. A kind of patron-client social relation between breeders and owners seems to curb the transformation process. This social obstacle adds to the existing technical problems in terms of availability of cattle breed and lack of cattle food. All these problems simply tell us that animal husbandry in South Central Timor is still totally dependent on the nature.*

*Letting the cattle free in open field, not with stall system, is the traditional way of running animal husbandry business as meant here. With this system, supervision and control is a difficult job. As a result, security problem is unavoidable, meaning the cattle are frequently stolen. Jealousy among breeders is perceived to be behind the case.*

#### C.2.6. Lack of Guidance and Levies in Fishery Sector

*Since the implementation of regional autonomy, the fishery sector in various fishery center areas in Indonesia is subject to various new levies, in the form of either tax or retribution. Several retributions can be mentioned here: Retributions on Fish Ship Tether, Retribution on Fish Trading Area, and Retribution on Fish Catching Business Permit. Some medium-scale fishery businessmen in Sibolga and Tegal Cities*

adat". Atau Permen No.05/99, dalam penilaian sebagian pihak, justru melanggar asas utama dalam pengakuan hak ulayat masyarakat adat yakni *self-identification*, karena secara sepihak menetapkan keberadaan hak-hak ulayat masyarakat adat di daerah tertentu (Abdul Haris Semendawi, 2001).

Untuk mengakhiri uraian ini, rasanya perlu juga dicatat satu pandangan berikut. Bahwa, hendaknya pengakuan eksistensi masyarakat adat dan atribut hak ulayatnya tidak lalu menyebabkan sulitnya dunia usaha, seperti para pemegang HPH atau penguasa pertambangan, untuk mendayagunakan potensi alam di suatu daerah. Karena itu sangat penting untuk diidentifikasi: (a) komunitas yang disebut sebagai masyarakat adat; (b) lokasi domisili dan lokasi aktivitas sosial ekonominya; (c) kompensasi tertentu seandainya ada pemanfaatan kekayaan (seperti pemanfaatan kayu oleh swasta) dalam areal hak ulayat masyarakat adat.

Ini semua demi perlindungan masyarakat adat di satu sisi, dan jaminan hukum berusaha pada sisi lainnya. Apa yang menjadi imperasi UU No.41/99 maupun Permen 05/99 agar dilakukan penelitian sebagai metoda pengidentifikasian masyarakat adat dan berbagai aturan berkenaan dengannya jelas posisif bagi maksud-maksud tersebut. Melibatkan pihak pemda, para pakar hukum adat, perguruan tinggi dan LSM, penelitian bekerja untuk membuat peta dasar lokasi masyarakat adat, batasan-batasan geografis, rekomendasi perlindungan hukum atasnya, dan lain sebagainya.

*of Agrarian No.05/99, in the opinion of some parties, instead violates the main principle in recognizing community's customary rights i.e., self-determination, because it unilaterally defines the presence of the community's customary rights in certain regions (Abdul Haris Semendawi, 2001).*

*Ending this explanation, it is necessary to note the following opinions. Recognition for indigenous communities and their customary rights should not hamper business community, e.g., holders of HPH (Rights to Manage Forests) or mining entrepreneurs, in utilizing natural potentials of a region. Therefore, it is very important to identify: (a) the community called indigenous community; (b) its place of domicile and social economic activities; (c) certain compensations in the event of utilizing some resources (such as timber industry by private entrepreneurs) in areas belonging to the community with customary rights.*

*All of these are aimed at protecting indigenous community on one hand, and business security on the other hand. Law No. 41/99 and Decision of the Minister of Agrarian No. 05/99 emphasize the importance of identifying traditional community and various related regulations. It is certainly favorable to invite local government officials, legal experts on customary rights, universities and NGO to participate in the preparation of a basic map for indigenous community areas, geographic boundaries, and recommendation for legal protection of these areas, etc.*

belum lagi harga jual ikan yang tidak stabil. Akibatnya mereka sulit bersaing dengan nelayan-nelayan besar. Kurangnya hasil tangkapan ikan mereka dipicu oleh maraknya nelayan-nelayan asing yang mereka anggap sebagai pencuri ikan. Persoalan ini hingga sekarang belum mendapatkan penanganan yang serius dari pemerintah.

Untuk sektor usaha perikanan darat juga mengalami hal yang hampir sama yaitu munculnya retribusi baru, seperti Retribusi Bibit Benur dan Udang, serta Retribusi Penjualan Hasil Tambak, dan Retribusi Izin Usaha Tambak Ikan. Pungutan-pungutan baru tersebut setidaknya terjadi di Kabupaten Pinrang, Sulawesi Selatan. Kendala lain yang dihadapi oleh para pengusaha perikanan darat di Pinrang adalah kekurangtanggapan pemda dalam mengantisipasi penyakit ikan dan udang budidaya mereka, terutama dalam penyediaan obat anti hama. Akibatnya usaha ini mempunyai resiko rugi yang cukup besar bila datang hama. Selain tidak tanggapnya pemda dalam hal ini dinas perikanan juga dinilai kurang melakukan pembinaan dan penyuluhan, terhadap petani tambak.

#### D. KEBIJAKAN-KEBIJAKAN DAERAH YANG BERHUBUNGAN DENGAN INVESTASI DAN DUNIA USAHA

Dari produk-produk kebijakan daerah yang berhubungan dengan investasi dan dunia usaha di daerah penelitian, terlihat masih menunjukkan sejumlah persoalan. Peraturan daerah sebagai salah satu produk kebijakan daerah yang menjadi salah satu indikator untuk menentukan daya tarik investasi kabupaten / kota, oleh responden yang berasal dari kalangan dunia usaha diberi bobot tertinggi diantara 9 indikator lainnya dalam faktor kelembagaan yakni sebesar 25%. Sementara faktor kelembagaan sebagai salah satu dari 5 faktor yang pembentuk daya tarik investasi suatu daerah, juga mendapat bobot tertinggi yakni sebesar 31%. Dari besarnya bobot yang diberikan terhadap indikator perda dibandingkan indikator lainnya, mengindikasikan bahwa indikator ini cukup krusial dan perlu mendapat perhatian lebih dibandingkan dengan indikator lainnya. Dari penelitian mengenai daya tarik investasi daerah kabupaten / kota diperoleh beberapa temuan penting berkaitan dengan produk-produk kebijakan daerah (Perda, SK, Bupati / Walikota dan sebagainya) khususnya yang berhubungan dengan dunia usaha (pajak, retribusi, dan pungutan lainnya), temuan-temuan tersebut antara lain :

*complained about the decreasing amount of fish catch, apart from the volatile selling price of fish. As a result they cannot compete with bigger fishermen. The decreasing volume of fish catch is perceived to be a result of the encroachment of foreign illegal fishermen. This problem attracts little serious attention from the government.*

*Fishpond business also faces the same problem with the imposition of new retributions, such as Retribution on Shrimp and Lobster Fries, Retribution on Fishpond Products Selling, and Retribution on Fishpond Business Permit. These new levies also apply at Pinrang Regency in South Sulawesi. Another problem faced by fishpond breeders in Pinrang is the ignorance of regional government in anticipating fish and shrimp diseases, especially in providing antidote for fish diseases. Said business usually suffers a great loss when diseases wrought havoc. Regional government especially Fishery Service also doesn't pay attention and doesn't provide enough training for fishpond breeders.*

#### D. REGIONAL POLICIES RELATED TO INVESTMENT AND BUSINESS

*Regional policies related to investment and business in the survey areas are being challenged by several concerns. Regional regulation as one form of regional policies and one of the indicators that determine the attractiveness of regencies/cities to investment was given by respondents the highest weight of 25% among the other nine indicators under the institutional factor. While institution as one of the five factors that determine attractiveness of an area to investment also receives the highest weight of 31%. Judging from the high weight of regional regulation compared to other indicators, it indicates that said indicator is quite crucial and needs to be given more attention compared to other indicators. This survey on investment attractiveness of regencies/cities offers several important findings related to regional policies (e.g. Regional Regulations, Decision of the Regent/Mayor and so on) particularly related to business (taxes, retribution and other tariff). Said findings are as follows:*

#### D.1. Cukup Banyak Perda-perda yang Mendistorsi Iklim Investasi di Daerah

Berdasarkan kajian tekstual yang dilakukan terhadap kebijakan daerah (Perda, SK Kepala daerah, dan sebagainya) dari 134 Kabupaten / Kota, khususnya yang berkaitan dengan pungutan baik pajak, retribusi, maupun pungutan lainnya, ternyata dari perda-perda 38.1% termasuk dalam kategori distortif terhadap iklim usaha, 47.8% bisa diterima, dan hanya 14.2% yang masuk dalam kategori suportif. Selanjutnya dengan mengambil sampel 463 responden pelaku usaha daerah dari 20 daerah Kabupaten / Kota, diketahui penilaian responden terhadap kualitas aturan-aturan formal sebagaimana diatur berbagai perda di daerahnya. Ada tiga hal yang dilihat dari aturan formal dalam perda yaitu; *pertama* penilaian pelaku usaha terhadap prosedur pelayanan dalam perda, *kedua* kesesuaian antar perda / kebijakan, dan *terakhir* kejelasan perda yang ada di daerah. Yang dimaksud dengan prosedur pelayanan dalam perda untuk penelitian ini, lebih difokuskan pada perda-perda yang mengatur mengenai pelayanan perizinan terhadap dunia usaha, diantaranya mengenai jalur pelayanan, kecepatan dan kepastian waktu pelayanan, kepastian biaya yang harus dikeluarkan, kemudahan yang diberikan, dan sebagainya. Sementara yang dimaksud dengan kesesuaian antar perda adalah konsistensi dan harmonisasi antar peraturan di daerah, tidak ada tumpang tindih, sehingga mengakibatkan kebingungan dan bahkan memungkinkan terjadinya pungutan berganda antar perda. Dan terakhir yang dimaksud dengan kejelasan perda untuk penelitian ini adalah penilaian responden atas kejelasan perda secara umum, yang menyangkut kejelasan obyek, subyek, tarif, hak dan kewajiban masing-masing pihak baik pemda maupun wajib pajak/retribusi, dan sebagainya.

Berdasarkan penilaian responden terhadap aturan formal berkaitan dengan kejelasan perda, 12.8% responden menilai tidak baik dan sangat tidak baik, 46% menilai baik dan sangat baik, dan 41.2% mengaku tidak tahu. Selanjutnya dilihat dari hal-hal yang bersifat prosedural dari perda - prosedur pelayanan, kepastian waktu, biaya, dan sebagainya -, 16% responden menilai tidak baik dan sangat tidak baik, 55.1% menilai baik dan sangat baik, dan 28.9% tidak tahu. Temuan dari kajian tekstual di atas sekilas terlihat agak berbeda dengan temuan hasil penelitian lapangan tentang penilaian dunia usaha terhadap perda-perda di daerahnya. Namun demikian perlu dicatat bahwa, *pertama*, dari penilaian pengusaha di daerah tersebut juga memperlihatkan bahwa masih banyak (cukup signifikan) responden yang menilai negatif terhadap perda-perda di daerahnya yaitu sebesar 29.5% responden (12.8% untuk kejelasan perda dan 16% untuk masalah prosedural perda). *Kedua*,

#### D.1. Quite Many of the Regional Regulations Distort Regional Investment Climate

*The result of the textual study on regional policies (Regional Regulations, Decision of the Head of Region, etc) from 134 Regencies/Cities, particularly those related to levy, whether about taxes, retributions or other kind of levy, shows that 38.1% of the respondents consider regional regulations as distorting business climate, 47.8% as acceptable and only 14.2% considered them as supportive. The respondents' evaluation on the quality of formal rules as regulated in regional regulations in certain areas is indicated in the analysis of sample of 463 regional respondents (businessmen) from 20 Regencies/Cities. There are 3 points that were examined in the analysis of formal rules as contained in regional regulations: first, business community's evaluation on service procedures stipulated in regional regulations; second, harmony among regional regulations and policies; and finally, clarity of regional regulations in certain areas. This study highlights the service procedures stipulated in regional regulations regarding business permit, such as service lines, quickness and definite service time, definite expenses, convenience and so on. Harmony among regional regulations refers to consistency and conformity, meaning absence of overlapping, which can brings confusion or even cause double taxation. Finally, clarity of regional regulations as defined in this study refers to clarity of object and subject of regulation, tariff scheme, rights and obligations of every party paying tax/retribution, etc. as stipulated in said regional regulation.*

*In terms of clarity of regional regulations as evaluated by respondents, 12.8% consider it as both poor and extremely poor, around 46% as good and extremely good and 41.2% are not aware. Whereas in terms of procedures stipulated in regional regulations which covers service procedures, time and cost certainty and so on, 16% of the respondents put poor and extremely poor assessment, 55.1% as good and very good, and 28.9% are not aware. The result of textual study denotes a slight difference with the result of field survey on business community's perception on regional regulations in certain areas. Nonetheless, we have to consider several factors. First, there is quite significant number of respondents that give negative assessment to the regional regulations in their regions, which is around 29.5% (12.8% for clarity of regional regulations and 16% for procedures in regional regulations). Second, there are respondents who are not*



masih banyak juga responden yang tidak tahu tentang perda di daerahnya (41.2% untuk kejelasan perda dan 28.9% untuk prosedur). *Ketiga*, penilaian responden tersebut baru terhadap aturan formal, artinya perlu diketahui apakah apa yang diatur secara formal tersebut telah sesuai dengan pelaksanaan di lapangan.

#### D.2. Kesenjangan antara Aturan Formal dengan Pelaksanaan

Dengan menelusuri penilaian responden terhadap beberapa aspek penting dalam suatu perda secara lebih dalam, ternyata menurut penilaian 463 responden terhadap praktik pelayanan birokrasi khususnya yang berkaitan dengan kejelasan jalur birokrasi (pelayanan) terhadap dunia usaha, 48.2% responden menilai positif (37.8% baik, 10.4% sangat baik), namun yang memberikan penilaian negatif ternyata masih lebih besar yaitu 51.2% (10.2% tidak baik, 41% kurang baik).

Selanjutnya dilihat dari perbandingan antara prosedur pelayanan yang diatur dalam perda dengan kejelasan prosedur pelayanan dalam praktiknya diperoleh masih bahwa dari responden yang memberikan penilaian baik terhadap prosedur pelayanan dalam perda, ternyata untuk kejelasan birokrasi dalam praktiknya juga dinilai baik oleh 47% responden, sementara yang memberikan penilaian kurang baik juga cukup besar yakni sebesar 41.1%. Namun jika dilihat dari jawaban responden yang mengaku tidak tahu mengenai berbagai ketentuan dalam perda seperti di atas, ternyata dalam praktiknya 41.8% menilai bahwa kejelasan jalur birokrasi kurang baik, 11.2% menilai tidak baik. Berkaitan dengan kepastian dan ketepatan waktu pelayanan, dari responden yang menilai prosedur pelayanan dalam perda baik, ternyata 49.8% menyatakan praktiknya kurang baik dan 6.8% tidak baik, dan hanya 34.7% responden yang menilai baik, 8.7% sangat baik. Sedangkan para responden yang tidak tahu mengenai aturan formal menilai kepastian dan ketepatan waktu dalam kenyataannya 38.8% kurang baik, 16.4% menilai tidak baik. Selanjutnya berkaitan dengan biaya atau pungutan pajak atau retribusi yang harus dibayar atau dikeluarkan oleh para pengusaha, ternyata responden yang menilai baik terhadap kepastian biaya dalam perda, terdapat 50.2% menilai dalam praktiknya tidak baik, 13.7% sangat tidak baik, dan hanya 15.8% yang menilai kepastian biaya baik. Sementara untuk responden yang tidak tahu aturan formal untuk kepastian biaya, dalam kenyataannya 43.3% menilai kurang baik, 18.7% menilai tidak baik. Selain kepastian biaya yang tidak baik, ternyata ditemukan pula bahwa 16.9% responden menyatakan bahwa disamping biaya resmi yang harus dikeluarkan terdapat biaya tidak resmi yang tinggi dalam

*aware of regional regulations in their own regions (41.2% for clarity of regional regulations and 28.9% for procedures in regional regulations). Third, the evaluation of respondents only focuses on formal rules, meaning there is a necessity to find out whether the things that are formally regulated operate in the fields.*

#### D.2. Gap Between Formal Rules and Their Implementation

*When the respondents' evaluation on several important aspects of one comprehensive regional regulation was subjected to further probing, it turns out that among the 463 respondents on the practice of government service, particularly related to clarity of service line in business, 48.2% assess it positively (37.8% good, 10.4% excellent), while, 51.2% give negative judgement (10.2% poor, 41% unsatisfactory).*

*Whereas, in terms of service procedures regulated in regional regulations particularly on its clarity in practice, it shows that from among the respondents who give good evaluation on service procedure in regional regulations, around 47% also give good evaluation for the clarity of service procedure in practice, while around 41.1% consider it as unsatisfactory. The assessment of the respondents who are not aware on various regional regulations as mentioned above, turns out that in practice around 41.8% respondents consider the clarity of service line as unsatisfactory, and 11.2% as poor. In relation to the certainty of service time, the respondents give good assessment for service procedures in regional regulations, however, 49.8% believe that the practice is unsatisfactory and 6.8% as poor and only 34.7% as good while 8.7% as very good. While, 38.8% of those respondents who are not aware about formal rules believe that the certainty of time in practice is unsatisfactory, and 16.4% as poor. In terms of clarity of the amount of levy to be paid, around 50.2% of the respondents who give good rating on certainty of expenses in formal rules, give bad assessment on its practice, 13.7% as extremely bad and only 15.8% rated positively the certainty of expenses. While, for respondents who do not know formal rules on tariff, 43.3% give unsatisfactory rating to the practice of tariff imposition, and 18.7% give poor assessment. In addition to poor quality in terms of certainty of expenses, around 16.9% respondents state that besides official expenses that should be paid, there is also a high amount of unofficial expenses in administrative service.*



pelayanan oleh birokrasi.

Temuan di atas memperlihatkan bahwa kesenjangan atau ketidaksesuaian antara aturan formal dengan praktik di lapangan dalam pelayanan oleh birokrasi pemda lebih banyak terjadi pada hal-hal yang berkaitan dengan kepastian/ketepatan waktu pelayanan dan biaya yang harus dikeluarkan oleh para pengusaha. Kesimpulan ini diperkuat pula bahwa dari penilaian responden terhadap konsistensi pemda dalam melaksanakan peraturan yang dibuat sendiri. Dari 463 responden 49.5% diantaranya menilai kurang konsisten, 9.7% menilai sangat tidak konsisten. Sementara yang menilai cukup konsisten 31.5% dan yang konsisten hanya 8.2%. Sementara untuk kejelasan jalur birokrasi tampaknya antara aturan formal dengan praktiknya tidak terlalu mengalami kesenjangan. Dengan demikian khusus mengenai prosedur pelayanan terdapat indikasi bahwa kualitas pelayanan kepada masyarakat khususnya yang berkaitan dengan kejelasan jalur birokrasi dipengaruhi oleh kualitas aturan formal sebagai landasan atau aturan main dari pelayanan yang diberikan oleh pemda kepada masyarakat.

#### D.3. Pelibatan Masyarakat dalam Perumusan Perda Kurang Baik

Pelibatan masyarakat / dunia usaha dalam perumusan kebijakan / peraturan daerah untuk keperluan penelitian ini dibedakan atau dibagi menjadi dua. *Pertama* adalah keterlibatan secara langsung atau aktif dalam proses perumusan dari *draft* awal hingga dalam bentuk rancangan kebijakan atau rancangan peraturan daerah (ranperda). Untuk selanjutnya bentuk pelibatan seperti ini disebut dengan *pelibatan secara aktif*. *Kedua*, pelibatan masyarakat dalam bentuk sosialisasi atas rancangan peraturan daerah sebelum ditetapkan atau diberlakukan sebagai peraturan secara definitif. Dalam sosialisasi ini masyarakat atau dunia usaha lebih banyak bersifat pasif. Untuk keperluan tulisan ini, pelibatan masyarakat seperti pada bentuk kedua tadi selanjutnya disebut dengan *sosialisasi*.

Temuan dari penelitian yang dilakukan oleh KPPD yang berkaitan dengan pelibatan masyarakat dan dunia usaha memperlihatkan, ternyata 45.8% responden menyatakan tidak ada pelibatan masyarakat dan dunia usaha secara aktif, 9.9% menyatakan ada pelibatan secara aktif tetapi dilakukan dengan proses yang tidak baik. Sementara responden yang menilai pelibatan masyarakat / dunia usaha secara aktif dan dilakukan dengan baik adalah sebesar 35.6%. Bentuk-bentuk pelibatan secara aktif dunia usaha yang dinilai tidak baik ini, diantaranya seperti pelibatan yang dilakukan cenderung bersifat formalitas, dan keterlibatan mereka terjadi hanya ketika ranperda telah siap untuk

*The above findings show that the gap or compatibility between formal rules and field implementation is more evident on matter related to the certainty of service time and tariff. This conclusion is also supported by respondents' assessment on the consistency of regional regulations. From 463 respondents, 49.5% give a rating of less consistent, and 9.7% for extremely inconsistent. Around 31.5% give moderately consistent rating and only 8.2% for consistent. However, for clarity of bureaucratic lines, it shows that the gap between formal rules and their application is not too obvious. Therefore, particularly on service procedure, it shows that the quality of service especially in terms of clarity of bureaucratic procedure is influenced by the quality of formal rules as the basis or rules of the game of services given by regional government to the society.*

#### D.3. Lack of Public Involvement in the Formulation of Regional Regulations

*Involvement of community, including business community, in formulating policies/regional regulations is distinguished in this research into two types. First is the direct/active involvement in the process of formulating the initial draft up to the final version of regional regulations (ranperda). It is called active involvement. Second is the involvement of public in the dissemination of draft regional regulation before its actual implementation. This characterizes a passive form of participation. In this research, this form of participation is called socialization.*

*The study done by KPPD on public and business community involvement reveals that around 45.8% respondents state that there is no active public or business community involvement, 9.9% state there is an active involvement though it is done in bad process. While, around 35.6% of respondents state that active involvement of public or business community is done in a good process. The poor involvement of business community seems to be for formality purposes only, meaning it happens only when the draft regional regulation is ready to be enacted or implemented. With this kind of involvement, the public or*

disahkan atau diberlakukan, sehingga masyarakat atau dunia usaha tidak benar-benar terlibat langsung dalam perumusan awal kebijakan, dan tidak dapat mempengaruhi arah kebijakan yang akan dibuat.

Sebagian besar responden mengaku bahwa keterlibatan mereka lebih banyak terjadi pada saat sosialisasi ranperda (pelibatan secara pasif), atau bahkan ketika perda telah secara definitif diberlakukan. Dilihat dari sosialisasi perda sebelum diputuskan atau diberlakukan secara definitif, 31.7% responden menyatakan tidak ada sosialisasi dan 17.9% menyatakan dilakukan sosialisasi tetapi mereka menilai sosialisasinya tidak berjalan dengan baik, dan 42.5% menyatakan sosialisasi perda dilakukan dengan baik. Data di atas memperlihatkan, bahwa pelibatan masyarakat secara aktif dalam pembuatan kebijakan dan sosialisasi kebijakan masih kurang baik.

Dari keberagaman jawaban responden yang sebagian menyatakan ada pelibatan dan sebagian lagi menyatakan tidak ada pelibatan juga memperlihatkan bahwa dalam pelibatan dan sosialisasi yang dilakukan oleh sejumlah daerah penelitian masih kurang melibatkan banyak kalangan dan tidak merata ke seluruh lapisan masyarakat. Buktinya masih banyak responden yang menyatakan tidak ada sosialisasi perda yaitu sebesar 31.7%. Walaupun sosialisasi perda ada namun ternyata kualitas dari proses sosialisasi tersebut menunjukkan

*business community are not, actually or directly involved in formulating initial draft of policies and therefore it can't significantly influence the concerned policy.*

*Most of the respondents claimed that their involvements usually take place in the socialization of draft regional regulation (passive involvement), or when regional regulation is definitely implemented. Even in terms of passive involvement before the enactment of regional regulation, 31.7% respondents state that there is no socialization, 17.9% state that the socialization is not done smoothly, and 42.5% state that the socialization of regional regulation is done in a good process. The above data show that, active public involvement in formulating policies is unsatisfactory and the socialization of policies is not done in a good process.*

*Variety in respondents' answers, saying that there is such involvement likewise no such involvement shows that the involvement and socialization done in several field surveys do not involve too many parties and there is no opportunity for equal involvement of the community. There are still many respondents, around 31.7%, who state that there is no socialization of regional regulations. If any, the quality of socialization process is unsatisfactory*

## Signifikansi Keterlibatan Public Dalam Proses Pembuatan Perda

### *Public Participation in Formulating Regional Regulations*

Menimbang kualitas sebuah kebijakan publik tidak hanya berdasar pada isi materialnya, tapi juga bagaimana muatan materi itu diproses, dengan keterlibatan publik sebagai ciri utamanya. Bahkan pengalaman umum menunjukkan, antar kedua kualitas ini adalah sisi-sisi dalam mata uang yang sama, di mana kualitas proses pembuatan berpengaruh simetris terhadap kualitas capaiannya (meski dengan sedikit catatan, keterlibatan publik tidak selalu dan otomatis menghasilkan isi kebijakan yang baik) Sebagai sebuah realitas plural, publik tentu memiliki aneka konflik kepentingan. Namun atas keunggulan metoda prosedural demokrasi, maka pada akhirnya tercipta konsensus kepentingan [demokrasi konsensual] atau minimal memenangkan kepentingan perwakilan suara umum [demokrasi representatif-mayoritarian].

Selain menjamin kualitas materi pengaturan, keterlibatan publik ini juga penting bagi peraihan legitimasi dan ketaatan masyarakat atas pemberlakuan suatu keputusan politik. Meski ciri yang melekat dalam suatu peraturan adalah sifatnya yang otoritatif (berlaku mengikat), ketidakterlibatan publik yang nantinya terkena otoritas itu hanya menciptakan sikap keterpaksaan, rasa memiliki yang rendah, atau bahkan pembangkangan (civil-disobedience). Bentuk-bentuk ketidaktulusan dan ketidaktaatan demikian pada putarannya hanya berakhir pada krisis legitimasi suatu kebijakan publik.

Semasa otonomi dewasa ini, cukup banyak daerah mulai memasukan faktor keterlibatan publik: dalam pemutusan kebijakan umum (seperti Kab. Boyolali), dalam penyusunan perda (seperti Kota Sawahlunto), dalam perencanaan dan

*The quality of a public policy is not only based on the content of its materials, but also on how the process to produce such content is characterized by high participation of the general public. Common experience tells us that these two qualities are two sides of the same coin, where the quality of the process in producing an output will symmetrically affect the quality of the output itself (although with a little caution that public participation is not always tantamount to automatic creation of a good policy). As a plural reality, the public has various conflicts of interests. However, due to the superiority of democratic procedural system, a consensus of interests is eventually materialized [consensual democracy] or at least the public interest will be favored [representative-majority democracy].*

*In addition to ensuring the quality of regulations, public participation is also critical so as to obtain legitimatization and people's obedience to the enactment of a political resolution. Although characteristic embedded in a regulation is authoritative (binding), yet the absence of participation of public who is the subject of incoming policy will eventually create a sense of coercion, low sense of belongingness or even civil disobedience. Such insincerity and non-compliance will eventually result in a legitimatization crisis of a public policy.*

*During this current autonomy, many regions have started including public participation in making decision over public policy (e.g., Boyolali Regency), in preparing*

kurang baik yang akibatnya 31.3% responden tidak tahu mengenai kejelasan perda, dan 20% tidak tahu kejelasan perda. Sosialisasi kebijakan di daerah-daerah biasanya hanya melibatkan sebagian kecil kalangan pengusaha, biasanya mereka yang tergabung dalam asosiasi-asosiasi pengusaha. Sementara diseminasi dilakukan setelah perda atau kebijakan daerah, telah ditetapkan atau diberlakukan, bukan sebelum masih dalam bentuk rancangan peraturan daerah (ranperda). Masih adanya responden yang tidak tahu kualitas perda pada responden yang menyatakan sosialisasi perda dilakukan dengan sangat baik ini barangkali karena mereka tidak secara langsung menangani hal-hal yang berkaitan atau diatur dalam perda pada kegiatan usaha di perusahaan mereka bekerja, atau bisa juga bukan pihak/orang yang mewakili perusahaannya dalam proses diseminasi yang ada, namun mereka tahu bahwa diseminasi perda di daerahnya telah dilakukan dengan baik.

#### D.4. Proses pelibatan masyarakat / dunia usaha dalam perumusan kebijakan mempengaruhi kualitas kebijakan yang dihasilkan dan Pengetahuan Masyarakat atas Kebijakan yang Dihasilkan.

Sebagai akibat dari proses pelibatan masyarakat secara aktif, yang dinilai berjalan kurang baik oleh para pengusaha di daerah seperti di atas, tampaknya

*and as a result around 31.3% respondents are not aware of the explanation of regional policies and 20% are completely unaware about the policies. The socialization of policies in areas usually just involves only small part of business community, usually those who are involved in employers' associations. Dissemination is being done after the regional regulation or policy is stipulated, and not when it is still a draft regional regulation. There are cases that some respondents perceive the stipulation of regional regulation transpires in a good manner even they admitted they don't know the quality of such regional regulations. Probably, in their work places, they never directly handled things related to regional regulations or they are not involved in their dissemination. What they are aware of is the process in the dissemination of regional regulations as good.*

#### D.4. The Process of Public and Business Involment in Formulating Policies Influences the Quality of Policies and Public Knowledge on the Policies

*Active, but unsatisfactory, public involvement as assessed above seems to influence the quality of policies and public knowledge on regional policies*

pengawasan pembangunan berbasis masyarakat (seperti Kota Gorontalo), dan sebagainya. Keterlibatan itu penting, baik dalam rangka memberdayakan kekuatan masyarakat (*civil society*) maupun bagi pembentukan suatu mekanisme pemerintahan yang baik dan bersih (*good governance and clean government*).

Secara umum, terdapat beberapa variasi bentuk partisipasi publik. Pertama, *public campaign*, yakni sebuah cara menjual ide-ide kepada masyarakat luas pada tahapan pengusulan rencana kebijakan/peraturan. Di sini harus dipastikan bahwa masyarakat bisa menangkap gambaran umum dari ide yang akan dibahas. Kedua, *public hearing/consultancy*, berisi proses penyerapan aspirasi dan dialog kritis untuk mencari simpul-simpul kecocokan antar ide para pengusul aturan dengan keperluan riil masyarakat. Ketiga, *public complain*, sebagai ruang bagi warga untuk mengkritisi dan bahkan menolak usulan materi, atau menilai suatu kebijakan yang sudah diputuskan seperti menyangkut perkiraan dampak kerugian yang akan ditimbulkannya.

Terlepas dari variasi nama, berbagai bentuk tersebut jelas menyiratkan adanya tahapan konsultasi publik dalam setiap pemutusan kebijakan. Dan secara teknis, metode pelaksanaannya melalui rupa-rupa pendekatan, tergantung pada kelompok sasaran. Pertama, pendekatan konstituen politik, melalui kunjungan kerja (saat reses) dari anggota wakil rakyat (DPRD) sebagai agen pembuat kebijakan daerah. Dengan kunjungan kerja ini, setiap anggota DPRD menyerap aspirasi yang berkembang di daerah pemilihannya masing-masing dan dibawah ke tingkat pembuatan Perda. Kedua, pendekatan *stakeholder*, dengan cara mengidentifikasi para pihak yang terkait langsung dengan sebuah aturan. Setiap keputusan memang berlaku umum, namun pasti ada sasaran utama yang terkait langsung di dalamnya. Mereka yang terkena dampak aturan ini perlu ditempatkan sebagai *stakeholder* dalam proses

*regional regulations (e.g., Sawahlunto City), in planning and overseeing community-based development program (e.g., Gorontalo City) etc. Such participation is crucial in empowering civil society as well as in establishing good governance and clean government.*

*Generally, there are several types of public participations. First, public campaign, i.e., selling ideas to general public when proposing a draft policy/regulation. It is expected that the public, through this process, can understand the general idea of the policy/regulation under discussion. Second, public hearing/consultation, which is a process of absorption or accommodation of aspiration and critical dialogue directed to find common point from the part of those proposing the regulations and the public's actual needs. Third, public complaint, as a forum for the community to criticize or even reject proposed materials, or to evaluate a policy made such as those pertaining to estimate impact it may cause.*

*Apart from variety of names, those types clearly indicate a stage of public consultation in decision making for every policy. And technically, its implementation should go through various approaches, depending on its target groups. First, political constituency approach, through official visits (during recess) by councilors (Regional People's Representatives Assembly/DPRD members) as policy makers at regional level. With such official visits, every DPRD member could understand the aspirations developing in his/her own electoral region and consider such aspirations in making Regional Regulations. Second, stakeholder approach, by identifying parties directly related with a regulation. Each decision shall indeed apply to all parties, but there will certainly be a main target directly related with it. Those who are affected by a particular regulation*



mempengaruhi kualitas kebijakan dan pengetahuan masyarakat atas kebijakan-kebijakan daerah yang telah dibuat oleh pemda. Hal ini terlihat dari jawaban responden yang menjawab tidak ada pelibatan masyarakat secara aktif dalam perumusan kebijakan di daerah, 41.5% diantaranya menjawab tidak tahu mengenai kejelasan perda, dan 13.7% menyatakan kejelasan perda tidak baik, 2.4% menilai kejelasan perda sangat tidak baik. Sebaliknya dari responden yang menilai pelibatan secara aktif masyarakat sangat baik, 35.3% menilai kejelasan perda baik, dan 29.4% sangat baik. Pengaruh pelibatan aktif dunia usaha dalam perumusan kebijakan terhadap kualitas kebijakan dapat dilihat juga dari kualitas prosedur pelayanan yang diatur dalam perda. Dari responden yang menyatakan tidak ada pelibatan masyarakat dalam perumusan perda, 31.6% mengaku tidak tahu prosedur pelayanan yang diatur dalam perda, 13.7% menyatakan tidak baik, dan masih ada 4.2% yang menyatakan sangat tidak baik. Sebaliknya dari responden yang menyatakan pelibatan masyarakat sangat baik, 41.1% diantaranya menilai prosedur pelayanan yang diatur dalam perda baik, dan 29.4% menilai sangat baik.

Kemudian dilihat dari sosialisasi yang dilakukan oleh pemda atas kebijakan yang mereka buat sebelum kebijakan tersebut diputuskan dan diberlakukan kepada masyarakat, ternyata juga mempengaruhi pengetahuan masyarakat / dunia usaha atas kebijakan yang dibuat oleh pemda. Hal ini terlihat dari responden yang menjawab tidak ada sosialisasi perda kepada masyarakat / dunia usaha, ternyata sebanyak 44.2% menyatakan tidak tahu akan kejelasan perda dan 38.1% menyatakan tidak tahu prosedur pelayanan yang diatur dalam perda. Sebaliknya, responden yang menyatakan sosialisasi perda dilakukan dengan sangat baik, ternyata lebih sedikit yang

*made by regional government. This can be seen from the feedback of respondents who claim that there is no active involvement in formulating regional policies. 41.5% of them state that they don't know any explanation on regional policy, 13.7% state that the explanation on regional policies is poor, and 2.4% as extremely poor. On the contrary, from respondents who state that direct public involvement is extremely good, around 35.3% state that the explanation on regional policies is good, and 29.4% as very good. The influence of active involvement of business community in formulating policies can be seen from the quality of service procedures as provided in regional regulations. Those respondents who claim that there is no public involvement in formulating regional regulations, around 31.6% admit that they don't know the service procedure regulated in regional regulations, 13.7% say it is bad, and 4.2% say it is extremely bad. While, from the respondents who state that public involvement is good, around 41.1% state that service procedure regulated in regional regulation is good, and 29.4% regard it as very good.*

*The dissemination conducted by regional government before the stipulation or implementation of regional regulation also influences public or business community's knowledge about policy made by regional government. The respondents confirmed that there was no explanation about Regional Regulations (Perda) to business communities. Around 44.2% respondents stated that they do not have any knowledge about regional regulation, whereas 38.1% of the respondents have no knowledge about the service procedure regulated in regional regulation. On the contrary, from those who stated that the explanation on regional regulation has*

pembahasannya, sehingga ide dan kepentingannya juga terakomodasi.

Kenyataan bahwa sebagian daerah mulai memasukan faktor partisipasi warga dalam penyusunan kebijakan/peraturan, tentu merupakan arah perkembangan yang positif di saat pemberlakuan otonomi daerah saat ini. Hasil penelitian KPPOD di 20 daerah kabupaten/kota terungkap bahwa sebagian responden (kalangan dunia usaha) merasa cukup terwakili (melalui asosiasi bisnis) dalam proses perumusan kebijakan daerah, meski sebagian lainnya tetap mengatakan tidak tahu dan atau tidak ada pelibatan/perwakilan semacam itu. Secara umum, berdasarkan hasil wawancara mendalam, persepsi responden ini juga tampak sesuai dengan pengakuan pihak pemerintah daerah di sebagian daerah, seperti Kota Sawahlunto, Kab. Kutai, dan sebagainya, tentang terlaksananya konsultasi publik dalam pembuatan peraturan/kebijakan daerah.

Namun juga masih bertahan kenyataan lama, bahwa sebagian daerah lain belum memperhitungkan signifikansi sekaligus penghormatan atas eksistensi kekuatan masyarakatnya. Di sini, paling jauh masyarakat sekedar dipakai sebagai pemberi justifikasi atas kebijakan/peraturan yang dibuat elite lokal, karena hanya sebagian kesempatan

*need to be considered as stakeholders in the discussion, so that their ideas and interests can be accommodated.*

*The fact that some regions have started to include public participation in their policy/regulation making is certainly a positive development during the ongoing arrangement of regional autonomy. The outcome of KPPOD's research in 20 regencies/cities reveals that some respondents (business entrepreneurs) feel that they are adequately represented (through their business associations) in the formulation of regional policy, although some others say that they are not aware of it and/or there is no such participation/representation. Generally, a further interview unveils that the perception of those respondents is similar with admissions given by local governments in several regions e.g., Sawahlunto City, Kutai Regency etc. about public consultation in regional regulations/policies making.*

*However an old reality remains that some other regions have yet to consider the significance or respect the existence of people's power. Here, people are used to provide justification for policies/regulations made by local elites,*

menyatakan tidak tahu mengenai kualitas perda. Yang tidak tahu kejelasan perda sebesar 26.7%, dan yang tidak tahu prosedur pelayanan yang diatur dalam perda sebesar hanya 23.3%. Responden yang menyatakan sosialisasi perda dilakukan dengan sangat baik, 23.3% dapat menilai bahwa kejelasan perda sangat baik dan 36.7% menilai kejelasan perda baik. Mereka juga menilai bahwa prosedur pelayanan yang diatur dalam perda 43.3% baik dan 30% sangat baik. Hal ini menunjukkan bahwa ada hubungan antara sosialisasi yang dilakukan sebelum perda diberlakukan / ditetapkan dengan pengetahuan responden terhadap kualitas kebijakan yang dihasilkan oleh pemda.

#### D.5. Pihak-pihak yang Terlibat dalam Perumusan Kebijakan dan Kualitas Kebijakan yang Dihasilkan

Secara sederhana penelitian yang dilakukan oleh KPPPOD ini mencoba untuk membuktikan asumsi bahwa kualitas suatu kebijakan daerah dipengaruhi oleh kualitas pihak-pihak yang berwenang merumuskan kebijakan tersebut (eksekutif, legislatif) dan proses perumusan kebijakan juga dilakukan dengan baik - adanya keterlibatan pihak-pihak yang berkepentingan dengan kebijakan yang akan dibuat. Dari penelitian ini diketahui, bahwa menurut pelaku usaha di 20 daerah penelitian kualitas pejabat eksekutif pada level pengambil kebijakan (kepala dinas, Bappeda, Sekda, dan Bupati) oleh 10.4% responden menilai tidak baik, 59.6% cukup dan 17.1% dinilai baik. Sedangkan kualitas anggota DPRD (lembaga legislatif) oleh 22.5% responden menilai tidak baik, 48.2% cukup dan 11.6% dinilai baik.

Bila dikaitkan antara kualitas pejabat eksekutif dengan kualitas kebijakan yang dihasilkan diperoleh hasil

*been done very well, there are only 26.7% who do not have any knowledge about regional regulation and 23.3% who do not know about the service procedure regulated in regional regulation. While, from among those who say that the dissemination has been done very well, there are 23.3% respondents who praised the clarity of the regional regulation as excellent and 36.7% as good. In terms of the service procedure regulated in regional regulation, 43.3% evaluate it as good, while 30% as excellent. It shows that there is a correlation between dissemination of regional regulation before its release and respondents' knowledge on the quality of regional government policy.*

#### D.5. Parties Involved in Policy Formulation and Quality of Issued Policy

*This research of the Regional Autonomy Watch (KPPPOD) has tried to prove the assumption that the quality of regional policy is affected by the quality of the institution formulating such policy (executive, legislative branches) and the involvement of interest groups perceived to be the stakeholders in the process of policy formulation. From this research, it shows that with regard to the quality of government officials entrusted with decision-making authority (Head of Service, Regional Development Planning Agency, Regional Secretary, and Regent), 10.4% of the total respondents rate them as poor, 59.6% as fairly good, and 17.1% respondents as good. With regard to the quality of DPRD members (legislative body), 22.5% respondents rate them as poor, 48.2% respondents as fairly good, and 11.6% respondents as good.*

*If the quality of government official correlates with the quality of issued policy, the following can be said.*

dalam diseminasi pasca pengesahan suatu peraturan. Ini diklaim dan dimanipulasi sebagai bukti telah dijalkannya konsultasi publik. Sedangkan pada derajat terendah dari itu, bahkan masyarakat sama sekali tidak mengerti atau tidak dilibatkan dalam pembahasan suatu kebijakan, dan baru kemudian mengenalnya saat akibat hukum (seperti terkena pungutan pajak/retribusi) diberlakukan atasnya.

Keberhasilan penguatan institusi-institusi lokal, baik pada aras governance dan local state maupun society, pada akhirnya memang tergantung pada jenis relasi yang dibangun antara elite dan warga daerahnya. Kerangka lama yang memformulasi hubungan itu sebagai subyek (penentu kebijakan) dan obyek (sasaran yang diatur), kini mesti diubah dalam rajutan yang lebih menyejajarkan dan sekaligus bersifat mutualistis. Publik, yang secara teknis berperan sebagai stakeholder dan secara politis sebagai konstituen, mesti lebih berkesempatan lagi untuk mendapat akses dan informasi berkaitan dengan proses pembahasan keputusan yang nanti akan diberlakukan atasnya. Inilah arah yang sejatinya hendak ditunjuk oleh Kompas Otonomi, untuk sepenuhnya mengangkat hak politik dan harkat kemanusiaan dari siapa pun yang selama ini termarginalkan.

*because they are only given opportunity in dissemination such regulations after they were endorsed. Such justification is claimed and even manipulated as evidence that public consultation has been done. And even worse, the community does not understand or is not involved at all at discussions over policy, and only realizes it when they feel its legal consequence (e.g., imposition of tax/retributions).*

*Success in strengthening local institutions, toward good governance and local state as well as society, will eventually depend on types of relations established between the elite and the local community. The old framework that puts policy maker as subject and target audience as object must now be changed in a more equal and mutual relationship. The public who technically acts as stakeholder and politically acts as constituent should be given greater opportunity to have access to information pertaining to discussions over a decision, which will eventually affect them. This is actually the real direction that is supposed to be achieved through regional autonomy, designed to fully bring forward political rights and human nature of those marginalized so far.*

sebagai berikut. Dari responden yang menilai kualitas pejabat perumus kebijakan (eksekutif) tidak baik, 33.37% menilai kualitas perda dilihat dari kejelasan perda negatif (8.3% sangat tidak baik dan 25% tidak baik, dan dari responden yang menilai eksekutif tidak baik, 50% menilai prosedur pelayanan yang diatur dalam perda negatif (14.6% sangat tidak baik, 35.4% tidak baik), dan 27.1% menilai baik, dan hanya 4.2% yang menilai sangat baik. Sebaliknya dari responden yang menilai pejabat eksekutif pengambil kebijakan mempunyai kualitas baik, 45.6% menyatakan kualitas kebijakan dilihat dari kejelasan perda baik, 19.1% menyatakan sangat baik, dan hanya 8.8% yang memberikan penilaian negatif (3.8% kurang baik, 5% tidak baik). Demikain juga dengan konsistensi pemda dalam melaksanakan peraturan yang dibuat sendiri, ternyata dari responden yang menilai kualitas eksekutif tidak baik 39.6% menilai pemda tidak konsisten, 47.9% kurang konsisten, sementara yang menilai cukup konsisten dan tidak konsisten hanya 12.5%. Sebaliknya dari responden yang menilai kualitas pejabat pemda baik, 41.8% menyatakan pemda cukup konsisten melaksanakan peraturan yang telah dibuat, dan 24.1% menyatakan konsisten. Dengan demikian terlihat adanya kecenderungan hubungan langsung dan linier antara kualitas pejabat yang berwenang merumuskan kebijakan daerah dengan kualitas kebijakan yang dihasilkan. Hubungan yang sama terlihat juga dengan kualitas anggota DPRD dengan kualitas kebijakan yang dihasilkan oleh daerah yang bersangkutan.

Dari penelitian ini juga diperoleh hasil, bahwa kualitas kebijakan daerah (kejelasan perda, prosedur pelayanan, kejelasan perda, kesesuaian antar kebijakan) akan semakin baik jika dalam perumusan kebijakan tersebut melibatkan masyarakat (dunia usaha). Dari jawaban responden yang menyatakan pelibatan masyarakat dan dunia usaha baik dan kualitas pejabat perumus kebijakan baik, 46.2% menyatakan kejelasan perda baik, dan 30.8% menyatakan sangat baik. Demikian juga dengan prosedur pelayanan yang diatur dalam perda 53.8% responden menyatakan baik dan 30.8% menilai sangat baik. Dari temuan di atas dapat diambil kesimpulan bahwa kualitas suatu kebijakan daerah, sangat dipengaruhi oleh kualitas pihak-pihak yang merumuskan kebijakan tersebut (eksekutif dan legislatif), ditambah dengan proses yang baik pula yaitu yang mengikutsertakan masyarakat atau pihak-pihak yang berkepentingan terhadap kebijakan yang akan dibuat.

**D.6. Rendahnya PAD Memicu Munculnya Perda-perda Distortif.**  
Masih banyak daerah yang menilai bahwa

*From among the respondents who assessed the quality of official (executive) in charge of policy formulation as poor, 33.37% gave negative assessment on the quality of regional regulation in terms of its clarity (8.3% stated very poor and 25% stated poor), 50% assigned negative assessment on service procedure regulated in regional regulation (14.6% stated very poor, 35.4% stated poor), while 27.1% stated good, and only 4.2% of the respondents marked it as excellent. Conversely, from among the respondents who perceived official in charge of policy formulation with good quality, 45.6% acknowledged the quality of policy in terms of its quality as good, 19.1% as excellent, and only 8.8% put negative assessment (3.8% stated unsatisfactory, 5% stated poor). Regarding the consistency of regional government in implementing its own regulations, from among the respondents who assessed the quality of executive as poor, 39.6% said that regional governments are inconsistent, 47.9% stated not so consistent, and only 12.5% stated satisfactorily consistent and inconsistent. Whereas, from the respondents who assessed the quality of regional government as good, 41.8% praised it as satisfactorily consistent in implementing the regulation it issued, and 24.1% regard it as consistent. Thus, it shows that there is a direct and linear relationship between the quality of regional government official in charge of policy formulation and the quality of the policy it issued. The same relationship holds true between the quality of DPRD members and the quality of the policy they made.*

*The result of this research supports that the quality of local policy (clarity of regional regulation, service procedure, consistency of policies) is even better if the community (business community) is involved in policy formulation. From among the respondents who perceived local community and businessmen' involvement as good and the quality of official in charge of policy formulation as also good, 46.2% accede that the clarity of regional regulation is good, and 30.8% as excellent. Regarding service procedure regulated in regional regulation, 53.8% assessed it as good, and 30.8% as excellent. Thus, it can be concluded that the quality of local policy is affected significantly by the quality of the official in charge of formulating such policy (executive and legislative bodies), and by a good process, that is with community's involvement or participation of the stakeholders to which the policy will be issued.*

**D.6. Low PAD Encourages the Issuance of Distorting Local Regulations**  
*Many regions perceive that the success of*



keberhasilan otonomi daerah adalah dengan peningkatan PAD, sehingga PAD yang tinggi digunakan sebagai parameter untuk mengukur keberhasilan dari pelaksanaan otonomi daerah. Di sisi lain banyak kalangan menilai bahwa, adanya target untuk meningkatkan PAD sebagai pemicu munculnya berbagai kebijakan yang *counter productive* terhadap iklim perdagangan dan investasi. Dengan target tersebut mendorong banyak daerah untuk membuat berbagai perda pungutan baru (pajak, retribusi, sumbangan, dan lain-lain). yang secara langsung maupun tidak langsung memberatkan baik bagi konsumen maupun produsen (pelaku usaha). Tidak heran jika kemudian banyak kalangan menuduh minimnya PAD sebagai penyebab munculnya berbagai Perda yang dapat mendistorsi iklim usaha dan investasi.

Dalam penelitian ini ditemukan bahwa, ditinjau dari kontribusi PAD terhadap APBD di 134 Daerah Kabupaten / Kota di Indonesia, ternyata hanya sebagian kecil saja yang mencukupi pembiayaan rutin di daerah. Hal ini menunjukkan adanya kesenjangan kemampuan daerah untuk menghimpun PAD, serta tidak meratanya sumber-sumber penerimaan daerah-daerah di Indonesia. Dari 134 Daerah Kabupaten / Kota di Indonesia yang menjadi obyek penelitian KPPOD tentang Daya Tarik Investasi Kabupaten / Kota di Indonesia memperlihatkan bahwa rata-rata kontribusi PAD terhadap APBD hanya sebesar 7,11%. Sebanyak 95 dari 134 daerah (71%-nya) kontribusi PAD terhadap APBD kurang dari 7,5%, 24 Daerah (18%-nya) 7,5% s/d 15%, dan hanya 15 Daerah (11%) yang kontribusi PAD terhadap APBD lebih dari 15%. Besar kecilnya kontribusi PAD terhadap APBD ini tampaknya berkaitan erat dengan besar kecilnya PDRB (Produk Domestik Regional Bruto) daerah yang bersangkutan. Dari 134 daerah yang diteliti oleh KPPOD, 85% daerah dengan PDRB kurang dari Rp1.5 Trilyun (rendah) ternyata kontribusi PAD terhadap APBD-nya kurang dari 7,5%, sedangkan 40% daerah dengan PDRB lebih besar Rp 5 Trilyun (Tinggi) kontribusi PAD terhadap APBD-nya lebih besar dari 15%.

Untuk keperluan pemeringkatan daya tarik investasi daerah KPPOD juga telah melakukan kajian tektual terhadap 709 perda pungutan (pajak, retribusi, sumbangan, dan sebagainya) yang berasal dari 134 Kabupaten / Kota di Indonesia. Tujuan dari pengkajian perda-perda tersebut untuk melihat tingkat kebermasalahan masing-masing perda tersebut berdasarkan beberapa parameter yang telah ditentukan. Selanjutnya berdasarkan tingkat kebermasalahannya diklasifikasikan atau dikelompokkan dalam kategori distortif, bisa diterima, dan suportif terhadap iklim usaha / investasi daerah. Dari hasil kajian tersebut terlihat bahwa setidaknya 38,1% termasuk dalam kategori distortif, 47,8% bisa diterima, dan hanya 14,2% yang

*regional autonomy lies in increasing PAD because the amount of PAD is being used as parameter to measure the success of the implementation of regional autonomy. But the target of increasing PAD seems to be tantamount to promoting the issuance of various policies that are counter-productive to business and investment climate. Said target encourages many regions to issue new regional regulations regarding levies (local taxation, retribution, donation, and so on) that just burden both consumers and businessmen directly and indirectly. This seems to be the reason why many parties consider low Original Regional Revenue (PAD) as the cause of the issuance of various regional regulations distorting business and investment climate.*

*From the research of KPPOD on the attractiveness of 134 regencies/cities in Indonesia to investment, it was found out that only few from 134 regions/cities in Indonesia meet the requirements for routine expenses from PAD's contributions to APBD. It shows that the potential condition of each region is not the same. On the average, PAD's contribution to APBD accounts to only 7.11%. 95 out of 134 regions (71%) have less than 7.5%, 24 regions (18%) with 7.5% to 15%, and only 15 regions (11%) with more than 15%. It seems that the amount of PAD's contribution to APBD is related to the amount of PDRB (Gross Regional Domestic Product). It was found out that 85% of the regions with less than Rp. 1.5 trillion (low) PDRB account their PAD's contribution to APBD as less than 7.5%. While 40% of the regions with more than Rp. 5 Trillion (high) PDRB, PAD's contribution to their APBD is more than 15 %.*

*For the same purpose of attractiveness rating, KPPOD has also done textual study towards 709 local regulations on levies (tax, retribution, donation, and so on) to examine the types and intensity of the problems based on established parameters. Three categories were used, namely distorting, acceptable, and supportive toward business and investment climate. It was discovered that at least 38.1% are under the distorting category, 47.8% as acceptable, and only 14.2 % are in supportive category. If the data on PAD's contribution to APBD correlate with the result of a study on regional regulation conducted by KPPOD, it seems that the assessment that*

masuk dalam kategori suportif. Jika dikaitkan antara data-data mengenai kontribusi PAD terhadap APBD di atas dengan temuan kajian perda yang dilakukan oleh KPPOD, tampak bahwa tuduhan atau anggapan bahwa minimnya PAD dapat memicu munculnya perda-perda distortif bisa kita diterima. Dengan analisis berdasarkan tabel silang antara daerah-daerah penghasil perda-perda dengan dengan tingkat kebermasalah perda, ditemukan bahwa dari daerah-daerah dengan kontribusi PAD terhadap APBD kurang dari 15% merupakan penyumbang terbesar perda-perda yang termasuk dalam kategori distortif yaitu sebesar 65,7%, dan daerah dengan kontribusi PAD terhadap APBD lebih dari 15% hanya menyumbang 5,2% perda distortif. Sebaliknya, jika ditinjau dari perda-perda yang berasal dari daerah-daerah dengan kontribusi PAD terhadap APBD lebih dari 15%, terlihat bahwa 53,3% perdanya termasuk dalam kategori bisa diterima, 33,3% termasuk dalam kategori suportif, dan hanya 13,1% yang termasuk dalam kategori distortif. Setidaknya temuan ini memperkuat anggapan bahwa rendahnya kontribusi PAD terhadap APBD memicu munculnya perda-perda pungutan yang dapat mendistorsi iklim usaha.

Distorsi perda terhadap iklim usaha tampak dari berbagai pungutan baik pajak dan retribusi yang melanggar berbagai prinsip ekonomi sehingga mengakibatkan ekonomi biaya tinggi dan hambatan perdagangan. Sebagai contoh pengenaan pungutan atas barang (komoditi) dan jasa yang mempunyai mobilitas tinggi dan bersifat lintas batas wilayah akan banyak mengakibatkan dampak negatif. Pungutan terhadap perdagangan komoditi ini banyak diterapkan di berbagai daerah, seperti Perda Kabupaten Bima No.16 Tahun 2000 tentang Pajak Atas Pengeluaran Hasil Bumi, Hutan, Laut, Perindustrian, Hewan dan Hasil Alam Lainnya; Perda Kabupaten Flores Timur No. 2 Tahun 2000 tentang Sumbangan atas Pengumpulan dan atau Pengeluaran Hasil Peranian, Perkebunan, Peternakan, Perikanan dan Hasil Laut, Kehutanan, dan Hasil Perindustrian; Perda Kabupaten Pasaman No.2 Tahun 2001 tentang Retribusi Asal Komoditas; Perda Kabupaten Tolitoli No.25 Tahun 2001 tentang Pajak Komoditi; Perda Kab. Kapuas No.14 Tahun 2000 tentang Pungutan Daerah atas Pengangkutan dan atau Penjualan Hasil Pertanian dan Industri Keluar Wilayah Kab. Kapuas, dan masih ada beberapa daerah lainnya yang juga mengenakan pungutan yang sama walau dengan nama yang berbeda.

Ditinjau dari sudut pandang ekonomi, harus disadari bahwa sikap dan perilaku daerah yang mengenakan pungutan terhadap komoditi yang melalui daerahnya, akan berdampak ekonomi biaya tinggi yang akan memberatkan masyarakat di banyak daerah dan daerah itu sendiri. Ada beberapa hal yang menyebabkan terjadinya ekonomi biaya

*inadequate PAD encourages the issuance of distorted local regulation is acceptable. Based on an analysis on cross tabulation between regions which issue regional regulation and the level of problematic regional regulation, it was found out that the regions wherein PAD's contribution to APBD is less than 15% are the biggest producers of regional regulations that are distorting (65.7%). While the regions wherein PAD's contribution to APBD is more than 15% contribute only 5.2% of distorting regional regulations. Through different way of analysis, it was discovered that from the regional regulations created by regions in which their PAD's contribution to APBD is more than 15%, 53.3% are acceptable, 33.3% are under supportive category, and only 13.1% are under distorting category. Then, the result of this study supports the assessment that inadequate PAD's contribution to APBD encourages the issuance of local regulations on levies, which can distort business climate.*

*Distortion as triggered by the issuance of regional regulation manifests from various levies in the form of tax and retribution, which break economic principles and spawn high cost economy and trade barriers. Levy on trading of commodities, which have high mobility, has been imposed in many regions. For example, the Regional Regulation of the Regency of Bima Number 16 Year 2000 regarding Tax on Exit of Agriculture, Forrest, Sea, Industrial, Animal, and Other Natural Products; Regional Regulation of the Regency of East Flores Number 2 Year 2000 regarding Fee on Collection and or Exit of Agriculture, Plantation, Cattle Raising, Fishery, Forrest, and Industrial Products; Regional Regulation of the Regency of Pasaman Number 2 Year 2001 regarding Retribution on the Origin of Commodity; Regional Regulation of the Regency of Tolitoli Number 25 Year 2001 regarding Commodity Tax; Regional Regulation of the Regency of Kapuas Number 14 Year 2000 regarding Regional Levy on Transportation and/or Sale of Local Agricultural and Industrial Products outside the territory of Kapuas, and so on.*

*From the economic point of view, the imposition of levy on commodity or products passing in a region produces high cost economy and eventually will burden the society. At any*

tinggi dalam pungutan lalu-lintas komoditi. Ekonomi biaya tinggi ini diantaranya disebabkan oleh banyaknya komponen biaya pelayanan, cakupan obyek yang terlalu luas, besarnya tarif pungutan yang tidak wajar, serta terjadinya pungutan berganda atas obyek yang sama. Ekonomi biaya tinggi bagi dunia usaha di sektor komoditi, dampaknya akan sangat luas. *Pertama*, besar kemungkinan beban pungutan tersebut oleh pengusaha akan dimasukkan sebagai komponen penentuan harga jual komoditi dengan demikian akan menaikkan harga jual komoditi sehingga akan mengurangi daya saing komoditi daerah yang bersangkutan, dan pada akhirnya akan menghambat perkembangan usaha di sektor ini. *Kedua*, untuk masyarakat di daerah, pungutan ini mengakibatkan beban tambahan karena kenaikan harga komoditi. Bila komoditi ini merupakan barang kebutuhan pokok, tentunya akan mengurangi kesempatan orang untuk mengkonsumsi kebutuhan pokok, yang akhirnya akan menghambat potensi peningkatan kesejahteraan masyarakat. *Ketiga*, untuk pungutan terhadap distribusi/perdagangan komoditi, bisa terjadi beban pungutannya akan dialihkan ke belakang (hulu) dalam mata rantai distribusi komoditi yaitu ke produsen (petani, nelayan, dan lain-lain), yaitu dengan cara menekan harga beli. Beban pungutan yang berat atas komoditi akan dapat mematikan sektor usaha barang-barang komoditi yang tergabung dalam mata rantai dari usaha bidang komoditi. Apabila para produsen mengambil keputusan untuk menghentikan produksinya, tentu saja pertumbuhan dan perkembangan sektor-sektor usaha lain yang tergabung dalam matarantai usaha ini juga terancam kelangsungan hidupnya. Dengan demikian pungutan atas komoditi akan berdampak negatif secara luas kepada perekonomian masyarakat, serta perekonomian daerah secara keseluruhan.

Selanjutnya bila kita tinjau dari sudut pandang yuridis formal, dari kajian tekstual yang dilakukan, menunjukkan bahwa pungutan-pungutan atas lalu lintas perdagangan barang seperti contoh di atas telah melanggar beberapa ketentuan formal. Pelanggaran ketentuan formal tersebut diantaranya adalah pelanggaran filosofi pungutan (pajak, retribusi, sumbangan dan sebagainya). Perda-perda yang mengatur pungutan atas komoditi di berbagai daerah mempunyai nama dan jenis yang beragam, seperti *Sumbangan (pihak ketiga); Pungutan Daerah; Pajak; Retribusi*; dan lain-lain. Bila dicermati secara mendalam, pada intinya peraturan-peraturan daerah yang mengatur retribusi tersebut adalah pungutan. Banyak pungutan yang disebut sebagai retribusi tetapi secara prinsip lebih bersifat Pajak. Ada pula pungutan atas komoditi yang diatur dalam perda tentang sumbangan (sumbangan pihak ketiga) atas perdagangan komoditi.

Selain pelanggaran prinsip sering pula

*rate, high cost economy has been attributed so far from a number of factors, namely service cost, scope of objects subject to levies, excessive tariff, and existence of double taxation. High cost economy will affect the business community to a great extent. First, the burden due to the imposition of levy will lead the businessmen to increase the price that will further weaken the competitive advantage of the regions' commodity. Second, the increase in the price of commodity will add burden to the region, especially if said commodities are basic necessities, which finally will hamper social welfare. Third, imposition of tax on commodity distribution/trading will be compensated back to the producers (farmers, fishermen, etc.) that is by pressuring the price. If producers decided to stop production, the growth and development of other sectors linked to commodity distribution chain will be hampered. Thus, levy on commodity has a negative impact on the regional economy as a whole.*

*Formal assessment from legal point of view as has been done so far through textual study reveals that levy on trading of commodity as explained above violates formal regulations, that is, breaking the philosophy of levy imposition (tax, retribution, donation, etc.). There are various names and genres of levy in regional regulation, such as Third Party Donation, Regional Levy, Tax, Retribution, and so on. Essentially, regional regulation that regulates retributions is levy in nature. Many levy called retributions, essentially, are tax in nature. There is also levy on commodity regulated in regional regulation regarding donation (third party donation) on commodity trading.*

*Aside from the fact that the levies imposed are*



dijumpai pungutan terhadap komoditi yang melanggar kewenangan pemerintah, yaitu pungutan oleh daerah terhadap obyek pajak yang menjadi kewenangan pusat. Akibat dari pelanggaran kewenangan tersebut adalah terjadinya pungutan berganda dengan PPN. Pelanggaran kewenangan juga terlihat pada perda-perda di banyak daerah yang memungut komoditi yang masuk (berasal dari luar daerah) ke daerahnya, karena yang berhak memungut retribusi adalah daerah asal. Banyaknya daerah yang memberlakukan peraturan semacam ini, akibatnya akan terjadi pungutan berganda atas obyek (komoditi) yang sama.

Dilihat dari sudut pandang kesatuan ekonomi dan perdagangan internasional, berbagai pungutan terhadap distribusi perdagangan komoditi akan mengakibatkan adanya hambatan tarif dalam perpindahan barang / komoditi dari satu daerah ke daerah lain. Seharusnya pungutan daerah baik itu pajak maupun retribusi hanya dikenakan atas obyek yang terletak atau terdapat di wilayah daerah yang bersangkutan dan mempunyai mobilitas yang cukup rendah serta hanya melayani masyarakat di daerah tersebut (Pasal 2 ayat (4) UU No.34 Tahun 2000 Tentang Pajak dan Retribusi Daerah). Hambatan-hambatan tarif terlihat pada perda Kab. Kapuas No.14 Tahun 2000 tentang Pengangkutan dan atau Penjualan Hasil Pertanian dan Industri Keluar Wilayah Kab. Kapuas, atau Retribusi pemotongan Hewan dan lalu Lintas Hewan di Kab. Sanggau No.13/2000. Pengenaan retribusi terhadap lalu lintas barang dan atau jasa antar daerah tersebut telah melanggar prinsip kesatuan ekonomi dan *free internal trade*, yang berdampak pada penurunan daya saing komoditi daerah dengan daerah lain. Dalam skala yang lebih luas yaitu dalam perdagangan internasional, apabila obyek pungutan ini adalah komoditi ekspor, maka akan sulit untuk menembus pasar internasional.

Dari kajian tekstual terhadap perda-perda di berbagai daerah dalam penelitian ini, terlihat bahwa tidak didapat daerah yang kreatif untuk mendorong kegiatan ekonomi terlebih dahulu sebelum melakukan pungutan-pungutan. Misalnya dengan memberikan insentif pembebasan atau keringanan pungutan terhadap para investor, dan sebagainya. Pemberian berbagai insentif yang kepada investor seperti di atas, diharapkan dapat mendorong pertumbuhan usaha yang telah ada serta untuk menarik investor untuk menanamkan modal di bidang usaha komoditi. Dari 709 perda yang dianalisis juga tidak dijumpai adanya perencanaan dari berbagai daerah untuk menjalin kerjasama dengan daerah lain dalam pengaturan lalu lintas perdagangan antar daerah yang diatur dengan keputusan bersama dengan

*violating the principle or philosophy of levy, there is also a problem of overlapping wherein the tax object that is supposed to be the object of central government's tax is imposed with regional tax or retribution. Double taxation occurs, because the tax object as regulated through regional regulation is already subjected to Value Added Tax (PPN). Violation of authority also happens in the case of regional regulations regulating the entry of commodity from outside a region, because in case like this it is the area of origin that is authorized to impose any levy. Rampant practice of this kind by regions will indispensably lead to double taxation in a serious extent.*

*From the point of view of economic integration and international trade, various levies on distribution of commodities produce tariff that hampers the movement of commodity from one region to another. Local levies either tax or retribution should only be imposed on objects inside a region with low mobility, and serve the local community (Article 2 paragraph (4) of Law Number 34 Year 2000 regarding Regional Tax and Retribution). Tariff barriers manifest in the Regional Regulation of the Regency of Kapuas Number 14 Year 2000 regarding the Transportation and/or Sale of Agricultural and Industrial Products outside the territory of Kapuas, or the Regional Regulation of the Regency of Sanggau Number 13 Year 2000 regarding Retribution on Slaughtering and Trafficking of Animal. The imposition of retribution to the trafficking of goods and/or service between regions has broken up the principles of economic integration and free internal trade, which affects the competitive advantage of the products of one region over the other. The same is true in a larger scale. It would be hard to penetrate the international market if the objective is to export products.*

*Based on the textual study on regional regulations in various regions, it appears that there is no region ingenious enough to encourage the advancement of economic activity by giving incentive or relief from tax or retribution before collecting it. Such incentive is anticipated to encourage the growth of existing businesses and expansion of investment in commodity business. From the 709 regional regulations subject to study, it was found out that there is no plan to develop regional cooperation in regulating*

membentuk Badan Kerja Sama Antar Daerah sebagaimana dimungkinkan Pasal 87 UU No.22/1999. Bila hal tersebut dilakukan oleh daerah-daerah tentunya akan tercipta praktik ekonomi yang sehat. Dari penelitian ini yang dijumpai justru hal yang sebaliknya yakni ada beberapa daerah yang mengeluarkan perda tentang pungutan atas komoditi yang mengatur retribusi terhadap barang yang masuk ke daerahnya padahal di daerah tersebut atas pengeluaran barang yang sama dari daerahnya tidak dikenakan pungutan. Perda ini barangkali mengandung tujuan untuk memproteksi komoditi daerahnya. Tindakan proteksi semacam ini bisa mengakibatkan tindak balasan oleh daerah lain, yang mengakibatkan praktek ekonomi yang tidak sehat. Terlihat bahwa masing-masing daerah seolah-olah berdiri sendiri dan bukan merupakan satu kesatuan ekonomi dan negara.

Kita menyadari bahwa terdapat perbedaan cara pandang dalam melihat permasalahan regulasi (perda). Dari sisi pengambil kebijakan atau pemda, perda-perda yang mengatur pungutan dipakai sebagai alat untuk meningkatkan pendapatan daerah dari sisi penerimaan sendiri. Sementara dari sudut pandang pelaku usaha, banyaknya pungutan terhadap kegiatan usaha merupakan beban ekonomi yang dapat menghambat perkembangan usaha. Dari apa yang ditemukan dalam penelitian di atas, memperlihatkan bahwa telah terjadi kecenderungan pada banyak pemda untuk mengembangkan PAD-nya dengan cara-cara over dan/atau inappropriate taxing yang menjadi disinsentif bagi investasi serta menjadi insentif bagi disinvestasi di daerah.

#### **E. UPAYA YANG DILAKUKAN OLEH PEMERINTAH DAERAH DALAM RANGKA MENARIK INVESTASI**

Di samping temuan-temuan yang memperlihatkan adanya kecenderungan distorsi terhadap iklim investasi di sejumlah daerah, penelitian ini juga menemukan sejumlah upaya-upaya pemerintah daerah dalam rangka menarik investasi ke daerahnya. Upaya-upaya yang dilakukan oleh pemerintah daerah untuk meningkatkan daya tarik investasinya cukup beragam dan tampak belum merata ke sebagian besar daerah, tetapi paling tidak ada fenomena perubahan ke arah yang lebih positif. Sejumlah upaya yang dilakukan oleh pemerintah daerah untuk menarik investasi diantaranya adalah sebagai berikut :

##### **E.1. Pembentukan Birokrasi Pelayanan Investasi**

Di era otonomi daerah peran pemerintah daerah dalam hal pelayanan kepada masyarakat termasuk kepada investor semakin besar. Dengan peran pemerintah daerah yang besar dalam hal pelayanan

*regional trade traffic, for example, by establishing an Inter-Regional Cooperation Body, the possibility of which is provided in Article 87 of Law Number 22 Year 1999. If initiated by regions, a healthy economic practice would exist. Unfortunately, it was found out that some regions issued regional regulation regarding retribution on incoming products. It may be intended to protect local products, however, it encourages other regions to issue the same regulation. It seems that each region is so independent that it is like an independent economic entity.*

*This research learns that there are differences in ways of looking at the problem on regional regulation. Local governments perceive regional regulations as means to increase local revenue. This is done without any regard that businessmen perceive it as economic burden that hampers business development. Apparently, in order to increase PAD, some regional governments employ inappropriate ways, which then become disincentive for investment and incentive for disinvestments in the regions.*

#### **E. REGIONAL GOVERNMENT'S EFFORTS IN ENCOURAGING INVESTMENT**

*In addition to the findings that reveal distortion to investment climate in some regions, this research has also discovered regional government's efforts in encouraging investment in its region. There are various efforts done, but they seem not extended to most regions yet. The fact, however, remains they are a positive phenomenon. Some of the initiatives of the regional governments to encourage investment are as follows:*

##### **E.1. Reform of Investment Service Bureaucracy**

*In the period of regional autonomy, regional governments are entrusted with a bigger role in serving their constituents including investors.*

kepada masyarakat tersebut, maka semenjak otonomi daerah diterapkan pada awal tahun 2001 lalu, salah satu bentuk kebijakan yang populer di tingkat daerah adalah mengenai perizinan. Namun disisi lain ternyata banyak kalangan yang merasa tidak puas terhadap pelayanan perizinan khususnya perizinan usaha yang dilakukan oleh birokrasi di daerah.

Dalam pelayanan investasi di beberapa daerah seperti di Kab. Lampung Barat, Kab. Pinrang, dan Kota Sibolga, masih belum ada perubahan dimana, pelayanan perizinan usaha masih dilakukan di Dinas Perindustrian dan Perdagangan. Sementara dinas-dinas terkait lainnya untuk memberikan rekomendasi atas pengajuan usaha tersebut (IMB oleh BPN, HO oleh dinas Ketertiban, Amdal : Bapedalda, dan lain-lain). Tetapi ada beberapa daerah yang ternyata telah melakukan restrukturisasi birokrasi pelayanan perizinan dalam upaya memperbaiki pelayanan kepada masyarakat dan dunia usaha. Restrukturisasi yang mereka lakukan salah satunya adalah dengan menerapkan sistem pelayanan Unit Pelayanan Terpadu (UPT) dalam pelayanan perizinan. Penerapan sistem UPT dalam pelayanan perizinan ini dimaksudkan untuk mempersingkat dan mempermudah birokrasi bagi para orang-orang yang mengajukan perizinan usaha.

Terdapat berbagai variasi dan perbedaan diantara daerah-daerah yang menerapkan sistem pelayanan UPT, baik dalam cara kerja, kewenangan, maupun nama. Sebagai contoh di Kab. Muara Enim, dimana UPT dibentuk sejak tahun 1997 dengan SK Bupati tahun 1996, dan diperbaharui dengan SK Bupati No. 15/1999. UPT yang dibentuk tersebut mengkhususkan pada bidang kepengurusan perijinan yang dilakukan secara terpadu pada satu kantor atau satu tempat. Misalnya saja bila masyarakat ingin mengajukan ijin pengolahan kayu. Segala perizinan yang terkait dengan usaha pengolahan kayu tersebut, seperti ijin HO, ijin SITU, cukup diurus di satu tempat yaitu UPT. Petugas yang ada di UPT yang akan berhubungan dengan bagian-bagian yang berwenang mengeluarkan izin atau rekomendasi, misalnya Cipta Karya, Bina Marga, dan bila ijin trayek ke LLAJ. Setelah ijin tersebut diproses oleh petugas di UPT, pemohon izin akan mendapatkan nota dari Kepala Unit Pelayanan Terpadu dan langsung di serahkan ke Sekretaris Daerah untuk dimintakan ijin resmi kepada Bupati. Hal ini berbeda dengan proses pengurusan perizinan sebelum diterapkan sistem UPT. Dimana sebelum diterapkan UPT dalam pengurusan perizinan usaha di Kab. Muara Enim, sebelum sampai ke Sekretaris Daerah harus dimintakan ijin terlebih dulu ke Bapeda.

Kelemahan dari UPT yang diterapkan di Kab. Muara Enim seperti sekarang ini berkaitan dengan

*Considering this reality, since the inception of regional autonomy in year 2001, one of the popular policies at the provincial level is license. But some parties feel dissatisfied with the service on license, especially with regards to business license in the region.*

*0In some regions, such as West Lampung Regency, Pinrang Regency, and Sibolga City, the practice remains that business license is being issued by the Industry and Trade Service. While, other related departments provide recommendation on license application (Building Construction Permit [IMB] by National Land Agency, Nuisance Permit [HO] by Public Order Service, Environmental Impact Analysis [Amdal] by the Regional Environmental Impact Management Board [Bapedalda], and so on). But some regions have restructured their license service to enhance its delivery to the people and businessmen. The restructuring is in the form of implementation of Integrated Service Unit (UPT) system in the license service. Said system is intended to simplify the bureaucracy for license applicants.*

*The implementation of UPT system varies among regions in terms of working procedure, scope of authority, or simply name. For example, in the Regency of Muara Enim, UPT was installed in 1997 by virtue of the Decision of the Regent in Year 1996 as recently amended by the Decision of the Regent Number 15 Year 1999. This UPT specializes in license management, which is done in one place. The license applicant, for instance applicant for wood processing license, can process all required related licenses on wood processing, such as HO, SITU, in one place, UPT. UPT officer will facilitate such transaction with other sections in charge of issuing such license or recommendation, such as Cipta Karya, Bina Marga, and LLAJ for road license. After said processing by the UPT officer, the applicant will then be given a letter by the head of UPT. Said letter shall be given to the Regional Secretary who will then process it with the Regent. It is different from the old license administration process before UPT, in which the applicant is required to process it with the Bapeda before the Regional Secretary.*

*The flaw of the UPT system, however, is still related to time needed in administering license since*



waktu yang dibutuhkan untuk pengurusan ijin, karena masih sangat tergantung keberadaan dari Bupati dan Sekretaris Daerah. Dalam implementasinya, ternyata menurut dunia usaha Muara Enim khususnya Kadin, mata rantai birokrasi untuk melakukan pembuatan ijin setelah otonomi daerah justru bertambah panjang, dan tidak ada kepastian waktu serta biaya karena banyaknya pihak yang campur tangan dalam hal pengurusan ijin. Akibatnya dalam pengurusan perizinan setelah otonomi daerah justru terjadi *high cost economy*. Hal yang hampir sama juga terjadi pada pelaksanaan UPT di Kota Denpasar, bahkan di Kota Denpasar para pengusaha dengan skala kecil merasa bahwa pelayanan perizinan usaha di kota ini cenderung diskriminatif dan memberatkan golongan pengusaha menengah dan kecil. Perizinan lebih mudah diperoleh oleh golongan pengusaha dengan modal besar.

Sementara itu di Kab. Kediri untuk perbaikan pelayanan perizinan usaha, berdasarkan Perda No.1 Tahun 2002 tentang Struktur Organisasi dan Tata Kerja Kantor Pelayanan Perijinan Kota Kediri, tertanggal 3 April tahun 2002, telah dibentuk Kantor Pelayanan Perizinan (KPP). KKP di Kota Kediri mulai efektif dilaksanakan pada bulan Mei 2002. KKP ini dibentuk untuk mengkomodasi proses pengurusan izin dalam satu tempat. Hal ini berbeda dengan sebelum dibentuk KPP, dimana dalam pengurusan izin dilakukan dalam beberapa tempat yaitu pada dinas-dinas teknis yang ada. Saat ini KKP Kota Kediri menagani enam jenis perizinan yang sebelumnya dilakukan oleh dinas teknis lainnya, yaitu IMB, HO, SIUP, TDP, IUI, Ijin Jasa Konstruksi. Sayangnya kantor ini masih terbatas pada pengumpulan berkas saja, sementara pengambilan keputusan dan prosesnya masih dilakukan oleh dinas teknis terkait. Menurut kalangan pengusaha di Kota Kediri, dengan dibentuknya KPP mereka belum dapat memastikan kepastian waktu penyelesaian permohonan perizinan. Hal ini disebabkan karena KPP hanya bersifat penerima berkas, bukan sebagai pengambil keputusan. Oleh karenanya, birokrasi menjadi bertambah panjang dan waktu penyelesaiannya terkadang tidak sesuai dengan yang telah ditetapkan. Sebagai akibat dari hal tersebut, para pengusaha lebih suka memanfaatkan jasa calo dalam proses pengurusan izin usaha yang beberapa diantaranya merupakan "orang dalam" (petugas pelayanan perizinan).

Di Kota Parepare institusi yang menagani pelayanan perizinan usaha adalah SINTAP (Sistem Perizinan Satu Atap), dan dilakukan oleh Satgas Investasi. Pada Stgas Investasi ini terdiri dari petugas-petugas dari BPN, Bapedalda, Dinas Perindustrian dan Perdagangan, Penanaman Modal, dan dinas-dinas teknis lain yang terkait dengan masalah perizinan usaha/

*it depends on the presence of the Regent and Regional Secretary. In its implementation, according to the businessmen, especially Kadin, the chain of bureaucracy in license processing in this era of regional autonomy is longer, with no time limit and flexible cost since a lot of parties usually interfere in the license management process. Consequently, high cost economy still transpires in license administration even with the introduction of regional autonomy. The same case happens in the implementation of UPT in Denpasar City. Small-scale entrepreneurs in Denpasar City feel that license service in said City is discriminative and is burdensome both for small and medium-scale entrepreneurs. While on the contrary, big businessmen are enjoying the system for the convenience it provides.*

*Whereas, in the Regency of Kediri a License Service Office (KPP) has been established to enhance license service by virtue of Regional Regulation Number 1 Year 2002 regarding the Organizational Structure and Working Arrangement in the License Service Office of Kediri, dated 3 April 2002. KPP Kediri started operating in May 2002 to accommodate license applicant's needs in one place. KPP Kediri, presently, is administering six different licenses: Building Construction Permit (IMB), Nuisance Permit (HO), Trading Business License (SIUP), Company Registration (TDP), Industrial Business Permit (IUI), and Construction License. Unfortunately, its responsibility is limited to the collection of documents, while decision making and processing are still assigned to the technical service office. Thus, bureaucracy becomes longer and sometimes tardy in processing the license on time. As a result, businessmen prefer the service of brokers, in which some of them are insiders (officers) in the license administration unit.*

*In the City of Parepare, license service is being managed by SINTAP (One-stop License System), and provided by Investment Task Unit. The investment task unit is consist of officers from BPN, Regional Development Planning Agency (Bapedalda), Industry and Trade Service, Capital Investment, and other technical services related to*

investasi. Satgas Investasi pada SINTAP di kota Parepare ini juga bertugas untuk memberikan penjelasan mengenai berbagai informasi mengenai investasi di Kota Parepare, yaitu yang berhubungan dengan prosedur, persyaratan, maupun informasi mengenai potensi investasi yang ada. Dalam pelayanan perizinan usaha Satgas Investasi diberi kewenangan memutuskan untuk menerima atau menolak permohonan yang diajukan, walaupun memang untuk persetujuan resmi masih harus mendapat persetujuan dan tanda tangan dari Walikota selaku kepala daerah. Untuk memperlancar proses perizinan, sebagai antisipasi ketiadaan Walikota di tempat, tanda tangan Wali Kota dapat juga diberikan dengan cara scanning dahulu.

Contoh bagus dalam peningkatan kualitas pelayanan usaha dipraktekkan oleh pemerintah Kabupaten Sidoarjo dengan merubah bentuk UPT perijinan dan penanaman Modal yang sebelumnya diterapkan menjadi Dinas Perijinan Dan Penanaman Modal. Perbedaan yang cukup mencolok antara UPT dengan Dinas adalah bahwa UPT masih sebatas menerima berkas permohonan, meneliti kecukupannya secara administratif, melakukan peninjauan lapangan dan membuat konsep keputusan, namun keputusan itu sendiri masih berada pada instansi-instansi yang bersangkutan. Kelemahan utama dari pola ini adalah birokrasi yang panjang dan berbelit-belit.

Dengan dibentuknya Dinas Perizinan dan Penanaman Modal, proses awal sampai pada tingkat keputusan ditangani langsung oleh Dinas perizinan. Dengan demikian birokrasinya lebih pendek, dan lebih cepat dan lebih efisien. Dalam prosedur pelayanan tersebut diberikan kepastian waktu, biaya maupun prasyarat-prasyarat apa yang diperlukan dan harus dipenuhi apabila mengurus perizinan. Proses pengurusannya sudah melalui satu atap, sehingga semua prosedur perizinan yang ada kaitannya dengan investasi bisa ditangani di satu dinas tersebut. Baik itu IMB, HO, Amdal, Pembebasan Tanah, Pengurusan Tanah dsb, semua ditangani dalam satu atap. Upaya untuk terus memberikan pelayanan terbaik bagi dunia usaha tersebut juga membawa hasil yang cukup bagus. Paling tidak ini bisa diukur dari 95.45 % pelaku usaha di Sidoarjo yang menilai positif pelayanan usaha di daerah ini (59,09% menilai baik dan 36,36% menilai cukup baik).

## E.2. Perbaikan Sistem Informasi Potensi Investasi

Berbagai cara dan strategi dilakukan oleh daerah untuk memperkenalkan daerahnya, khususnya yang berkaitan dengan potensi investasi. Hal yang paling umum dilakukan oleh daerah adalah dengan melakukan

*Investment License. The investment task unit in SINTAP is responsible in providing explanation on investment information in the City of Parepare, such as procedures, requirements, even information about the existing and potential investment. The Investment officer has a right to accept or reject an application. But in formal agreement, there is a need for mayor's involvement. To sustain smooth license processing, in case of mayor's absence from office, his/her signature can be accessed through scanning.*

*Good example in improving the quality of license service is being practiced by the regional government of Sidoarjo Regency. The regional government transformed the UPT of license and investment as a License and Investment Service. Basically, the difference between UPT and the License and Investment Service is that UPT accepts applications, examines their administrative completeness, does field observation and provides recommendation, but the decision itself lies on related institutions. The system's main weakness is its long and complicated bureaucracy.*

*By establishing a License and Investment Service, license applications can be administered once from the beginning of the process to the level of decision. In other words, the administration is happening under one roof. It means that all license procedures related to investment, such as IMB, HO, Amdal, Land Release, can be arranged by said service. Thus, bureaucracy is shorter, faster, and more efficient. This procedure saves time, cost and cut requirements needed in processing of license. These efforts have brought satisfying results. It can be seen from the responses of 95.45% businessmen from Sidoarjo Regency who put positive assessment to the license service of Sidoarjo's regional government (59,09% regard it as good and 36.36% as satisfactorily good).*

## E.2. Improvement of Information System of Potential Investment

*Various ways and strategies have been done by regions to promote themselves, especially to potential investors. The most common strategy is through product and potential investment*

pameran produksi dan potensi investasi pada berbagai kesempatan baik di tingkat nasional maupun ke mancanegara. Ada beberapa daerah yang melakukan terobosan dalam melakukan promosi daerahnya dengan memanfaatkan kemajuan teknologi informasi berupa internet yakni dengan membuat website, seperti yang dilakukan oleh Kota Denpasar, Kota Parepare, dan Kab. Sidoarjo. Website yang dibuat oleh daerah-daerah tersebut memuat berbagai informasi mengenai potensi investasi dan berbagai prosedur pelayanan terhadap para investor. Selain mempermudah pemerintah daerah dalam melakukan promosi, penggunaan media internet ini juga mempermudah calon investor untuk memperoleh berbagai penjelasan mengenai prosedur, persyaratan, dan mengetahui hal-hal lainnya tentang daerah yang bersangkutan. Sebagai contoh Kab. Sidoarjo dengan website-nya, [www.sidoarjo.go.id](http://www.sidoarjo.go.id), menampilkan berbagai informasi mengenai daerahnya. Website ini tidak hanya berisi mengenai peluang dan prosedur investasi, tetapi juga memuat berbagai informasi mengenai kebijakan pembangunan yang dilakukan oleh pemerintah daerah, seperti peraturan daerah, APBD, RUTR, dan sebagainya. Pemanfaatan jaringan internet untuk melakukan promosi daerah mempunyai keuntungan karena kelebihanannya berupa kemudahan mengakses dan jangkauannya sangat luas dan tersebar di seluruh pelosok dunia.

### E.3. Perbaikan dan Penyediaan Infrastruktur Fisik

Salah satu daya tarik investasi daerah adalah ketersediaan sarana dan prasarana pendukung kegiatan usaha. Menyadari pentingnya ketersediaan dan kualitas infrastruktur fisik tersebut, dalam rangka meningkatkan daya tarik investasi daerahnya beberapa daerah mulai membenahi dan menambah berbagai infrastruktur fisik pendukung kegiatan usaha di daerahnya. Dalam upaya menarik investasi dan mendorong pertumbuhan kegiatan ekonomi di daerahnya, Kota Parepare, telah membuka kawasan yang disediakan khusus untuk industri seluas 250 ha yang akan dikembangkan menjadi kawasan Berikat di daerah Lapedde. Hal yang sama juga dilakukan oleh Kab. Muara Enim, Kab. Sidoarjo, Kab. Serang, dan Kota Kediri. Dengan penyediaan dan pengembangan kawasan industri tersebut diharapkan dapat menarik investor untuk membuka usaha di daerah yang bersangkutan. Selain penyediaan kawasan industri upaya perbaikan dan peningkatan kualitas infrastruktur fisik lainnya juga dilakukan oleh beberapa daerah, seperti peningkatan Kapasitas Pelabuhan di Kota Parepare, Perluasan Lapangan Udara di Kota Sibolga. Untuk memperlancar hubungan dengan daerah lain, Kota Sibolga bekerja sama Kab. Tapanuli Tengah dan daerah

*exhibition at the national and international levels. Some regions, such as Denpasar City, Parepare City, and Sidoarjo Regency, have made breakthrough in promoting themselves by using information technology through the Internet. They have formed websites that contain various information about potential investment and service procedures for investors. Besides facilitating the regional government in promotion, the use of Internet also helps future investors to access various materials regarding the procedures, requirements, and other information about the region. For example, the Regency of Sidoarjo through its website, [www.sidoarjo.go.id](http://www.sidoarjo.go.id), has brought forward various information about the region. The website is full of information about investment opportunity and procedures and developments on policy issued by the regional government, such as regional regulations, APBD, RUTR, and so on. The use of Internet to promote regions is beneficial for the accessibility it provides, wide reach and extent all over the world.*

### E.3. Improvement and Provision of Physical Infrastructure

*One of the determinants of the attractiveness of region to investment is the availability of supporting infrastructure for business activity. Realizing the importance of the availability and quality of physical infrastructure, some regions are starting to improve and complete their various infrastructures to promote business in the regions. In order to attract investment and encourage the growth of economy, the City of Parepare has opened a 250 ha. area especially for industries. Said area will be developed into Bonded Zone in Lapedde. The Regency of Muara Enim, Regency of Sidoarjo, Regency of Serang, and the City of Kediri seem to follow suit. With availability and development of industrial area, the regional government is anticipating for the influx of investors in the region. Other efforts aimed at developing the quality of physical infrastructure include expansion of port's capacity in the City of Parepare and widening of airports in the City of Sibolga. To establish a smooth link with other areas, the City of Sibolga, on the other hand, cooperated with the Regency of Central Tapanuli and surrounding*



sekitarnya dengan mengembangkan pelabuhan udara Pinangsori dan mengusahakan membuka penerbangan secara reguler dari dan ke pelabuhan udara tersebut. Hal ini sejalan dengan kerjasama yang dilakukan oleh pemerintah daerah Propinsi Sumatera Utara dan lima propinsi lainnya dalam mendirikan perusahaan penerbangan Sumatera Air.

Walaupun masih terdapat banyak kekurangan, berdasarkan temuan-temuan mengenai upaya-upaya daerah untuk menarik investasi seperti di atas menunjukkan bahwa beberapa daerah di Indonesia telah menyadari pentingnya peran investasi dalam pembangunan ekonomi daerah. Ada kesadaran bahwa dengan keterbatasan dana pembangunan yang dimiliki oleh pemerintah pusat maupun yang mereka miliki, maka investasi baik asing maupun dalam negeri dipandang sebagai suatu pola kebijakan pembiayaan pembangunan yang tepat untuk mendorong pertumbuhan ekonomi di daerah. Tidak seluruh dana pembangunan tersebut dapat disediakan oleh pemerintah karena dana pemerintah umumnya lebih banyak difokuskan pada penyediaan *public goods*. Modal dari luar negeri dan sektor swasta dibutuhkan untuk menutup kekurangan dana tersebut. Daerah-daerah semakin menyadari bahwa penanaman modal baik dalam bentuk penanaman modal dalam negeri maupun asing membutuhkan iklim usaha yang sehat, adanya kemudahan serta kejelasan prosedur penanaman modal. Kesadaran akan pentingnya investasi dalam pembangunan di daerah tersebut terlihat dari upaya beberapa daerah untuk meningkatkan daya tarik mereka terhadap investasi, sebagaimana terlihat dalam berbagai upaya yang mereka lakukan untuk menarik investasi ke daerahnya.

*areas for the development of Pinongsari Airport and for the opening of regular incoming and outgoing flights. This matter is in line with the partnership among provincial governments in North Sumatra and five other provinces in building a carrier company, named Sumatra Air.*

*Based on the findings on regional efforts to promote investment as explained above, it shows that some regions in Indonesia have realized the importance of investment in regional economic development. Realizing that both the central and regional governments have limited development fund, hence foreign and domestic investments are considered as the right sources of development financing to promote regional economic growth. The government cannot provide all the development funds since the national revenue is focused more on provision of public goods. Therefore, investment is needed to cover the deficit in the development fund. Knowing that business and investment climate are crucial considerations in investment, several regional governments have made improvement in many sectors to promote investment in their regions.*

# V. KESIMPULAN DAN SARAN

## *Conclusion and Recommendations*

### A. KESIMPULAN

1. Dalam persepsi dunia usaha, faktor yang dianggap dominan dalam menentukan daya tarik investasi suatu daerah secara berurutan adalah faktor kelembagaan (31%), sosial politik termasuk di dalamnya keamanan dan budaya (26%), ekonomi daerah (17%), tenaga kerja dan produktivitas (13%), dan infrastruktur fisik (13%). Masing masing faktor tersebut terjabarkan secara rinci dalam berbagai variabel, dimana masing masing variabel terbentuk dari sejumlah indikator yang dipandang perlu oleh dunia usaha dalam menentukan daya tarik investasi suatu daerah.
2. Bobot faktor kelembagaan, dan faktor sosial politik budaya keamanan yang jauh lebih besar dari bobot faktor potensi ekonomi daerah menunjukkan belum normalnya iklim investasi di Indonesia. Dalam keadaan normal, para pelaku usaha umumnya menempatkan potensi ekonomi sebagai faktor utama untuk pertimbangan investasi.
3. Terkait dengan pemeringkatan daya tarik investasi antar daerah, pemberian bobot besar pada faktor kelembagaan dan faktor sosial politik budaya keamanan (sebagai policy variable) mendorong daerah daerah yang miskin sumber daya alam maupun manusia (utamanya sumber daya alam sebagai *edowment variable*) untuk optimis secara kreatif membenahi iklim investasi di daerahnya.
4. Urutan peringkat daya tarik investasi Kabupaten/ Kota yang tercakup dalam kelima faktor pemeringkatan menunjukkan bahwa tidak satupun daerah yang dapat menempati peringkat 10 besar di semua faktor pemeringkatan. Hal ini berarti dalam persepsi pengusaha tidak satupun daerah yang dapat mengatakan bahwa daerahnya mempunyai kinerja baik di semua bidang, selalu

### A. CONCLUSION

1. *From the perception of business community, the attractiveness of a region to investment is determined by the following factors, each with its level of significance: institutional factor 31%, socio-political factor including security and culture 26%, regional economy 17%, labor and productivity 13%, and physical infrastructure 13%. Several variables have been identified as significant under each factor, and several indicators under each variable, forming a structure of preferences of business community in looking at current development in regional autonomy in its relation to investment attractiveness.*
2. *The relatively high weight of institutional factor and socio-political factors including culture and security compared that of economic potential simply shows that investment climate in Indonesia is not normal yet. In normal condition, business community commonly place economic potential as the main factor on investment consideration.*
3. *The high weight of institutional and socio-political factors including culture and security (policy variable) from the point of view of business community is supposed to encourage regions with poor natural and human resources to improve investment climate in their areas creatively.*
4. *There is no single region found to be qualified for the top 10 of all 5 factors of rating. It means that from the perception of business community, there is no single region that can perform well in all fields. It may be strong in one variable but weak in others.*

terdapat kelemahan di bidang lainnya.

5. Sementara itu, peringkat atas daya tarik investasi daerah yang lebih banyak diraih oleh daerah-daerah Kota dibandingkan Kabupaten, dalam kaitannya dengan bobot policy variable yang sangat besar di atas; menegaskan bahwa daerah Kota lebih baik dalam sumber daya manusianya untuk mendukung kinerjanya dalam hal kelembagaan.
  6. Tujuan penelitian untuk mendapatkan gambaran daya tarik investasi justru menghasilkan sejumlah permasalahan khas yang dihadapi masing-masing sektor usaha. Dari sudut pandang lain, hal ini menunjukkan bahwa daerah-daerah dengan dominasi sektor usaha tertentu akan sangat menarik bagi investasi bila mampu mengatasi permasalahan-permasalahan utama di tiap sektor tersebut. Permasalahan khas sektoral yang teridentifikasi adalah *Pertama*, sektor usaha manufaktur umumnya merupakan lahan subur bagi pungutan liar; baik biaya tidak resmi yang harus dibayarkan ke aparat birokrasi, maupun pungutan liar di seputar lingkungan usaha yang dilakukan sekelompok orang atas nama ormas, pemuda kampung maupun preman. *Kedua*, sebagian besar pelaku usaha sektor perdagangan dan jasa mendapatkan perlakuan diskriminatif dalam hal perijinan usaha. Pelayanan perijinan yang lebih baik diberikan kepada kalangan usaha yang mampu membayar biaya perijinan dibanding kelompok yang kurang mampu. Sistem perijinan dengan rantai birokrasi yang panjang dan berbiaya tinggi dengan sendirinya menyisihkan pelaku usaha kurang mampu, umumnya UKM. *Ketiga*, munculnya benturan sosial budaya pada sektor usaha berbasis lahan luas, umumnya sektor perkebunan, kehutanan dan pertambangan. Hal ini terkait dengan hak atas tanah adat /ulayat, dan tanah warga lainnya yang dahulunya diambil alih kepemilikannya dengan memarginalkan warga yang mempunyai posisi tawar lemah. Masalah lain adalah *euforia* demokrasi yang tidak pada tempatnya yang didesakkan sekelompok oknum kepada dunia usaha secara tidak proporsional. *Keempat*, adanya kendala etos kerja dan budaya masyarakat dalam peningkatan produktivitas sektor usaha peternakan, dimana peternak yang dimanjakan alam menunjukkan resistensinya untuk mengikuti pola peternakan produktif. *Kelima*, ketidakjelasan kebijakan sesudah otonomi daerah di sektor pertambangan.
5. *Better ranking of cities compared to regencies in terms of investment attractiveness - especially in relation to policy variable - indicates that cities are better in terms of human resources to support their institutional operation.*
  6. *A number of problems typical to specific sector have been identified in this research. Measures to deal with these problems would be significant in making regions attractive to investment. The problems meant to be typically sectoral are as follows: First, manufacturing sectors prone to illegal levies, practiced by either government officials or surrounding community identified as mass organizations, village youth, or gangster. Second, discriminative treatments experienced by businessmen in trade and service sectors in the process of securing their business license. Better service tends to be given to big businessmen, while poor service goes to small and medium-scale businessmen. License service system characterized by long bureaucratic chain and high cost will automatically set small businessmen apart. Third, emergence of socio-cultural clash in relation to agrarian affairs, posing threat to business sectors, which require wide area of land, such as plantation, forest, and mining. It is related to customary land rights and other people's lands the ownership of which had been taken over in the past through unfair treatment to people having weak bargaining power at that time. It is in fact exaggerated by groups of people taking advantage from euphoric democracy currently in existence. Fourth, work ethos and local culture irresponsive to new technology, leading to low productivity in animal husbandry sector. Fifth, unclear policy and regulations in mining sector. This is because the laws on mining, environment and forest in the national level are contradicting one another. This problem of law uncertainty adds to several problematic regional policies having been in existence in the regions, further*



perundangan di tingkat pusat yang mengatur pertambangan, lingkungan hidup dan kehutanan menyebabkan ketidakpastian berusaha; ditambah dengan beberapa kebijakan daerah yang membingungkan pelaku usaha sektor ini dalam hal perijinan usaha.

7. Dalam hal kebijakan daerah, standar pelayanan usaha yang tidak jelas diatur dalam Perda (Peraturan Daerah) tentang Retribusi (22.7%) merupakan hambatan cukup serius bagi dunia usaha karena kepastian mengenai prosedur, waktu, struktur tarif, ataupun biaya, tidak bisa didapatkan pengusaha ketika berhubungan dengan aparat birokrasi.
8. Jenis pelanggaran Perda berupa relevansi acuan yuridis yang tidak tepat, dan tidak dipenuhinya standar penyusunan Perda sebesar 24.2% menunjukkan lemahnya kemampuan legal drafting penyusun kebijakan daerah.
9. Lemahnya kapasitas penyusun kebijakan daerah tersebut di atas sayangnya tidak diimbangi dengan upaya pemerintah daerah untuk melibatkan partisipasi masyarakat dalam penyusunan Perda; sosialisasi Perda yang diklaim telah dilaksanakan lebih tepat disebut diseminasi karena lebih banyak dilakukan setelah Perda tersebut definitif berlaku secara resmi.
10. Sebagian besar daerah penelitian (89%) dengan PAD dibawah 15% dari APBD (71% daerah dengan PAD di bawah 7,5% dan 17% daerah dengan PAD antara 7,5-15%) menerapkan Perda tentang pungutan (retribusi, pajak dan pungutan lainnya) yang tidak bersahabat dengan aktivitas usaha (38,1% distortif, 47,8% bisa diterima dan 14,2% suportif). Temuan ini juga menjadi indikasi bahwa penerapan penerapan Perda pungutan lebih dikarenakan untuk menaikkan PAD. Untuk kepentingan daerah, hal ini akan merugikan daerahnya sendiri apabila investor menjauhi daerah tersebut karena faktor peraturan daerah yang distortif.
11. Selain masih banyaknya masalah dalam kaitannya dengan kebijakan daerah, bila dibandingkan dengan pemeringkatan daya tarik investasi daerah yang dilakukan KPPOD tahun 2001, jenis pelanggaran prinsipil dalam Perda seperti hambatan perdagangan dalam negeri yang relatif kecil (2.3%) mengindikasikan perbaikan kinerja pemerintah daerah dalam menarik investasi ke

*confusing matters related to business license.*

7. *Unclear business service standard in regional policies provided in Regional Regulation (Perda) on Retribution (22.7%) is a serious obstacle to business community. Business player simply cannot expect government officials to provide clear explanation and certainty on procedures, time, tariff structure, or cost.*
8. *Weak legal basis of regional regulation and violation to the standard in compilation of local regulations (24.2%) indicates low capability in legal drafting.*
9. *Low capability in legal drafting is, unfortunately, so far not balanced with efforts of regional government to involve public in regional regulations formulation. Socialization of regional regulations is better called dissemination since it is done after the enactment of concerned regional regulations.*
10. *Most regions (89%) with PAD below 15% from APBD (71% regions with PAD below 7,5% and 17% regions with PAD between 7,5-15%) tend to impose regional regulations on levies (retribution, tax, and other levies) unfriendly to business community (38.1% distorting, 47.8% acceptable, and 14.2% supportive). This finding indicates that the existence of regional regulation (Perda) on unfriendly levies is simply driven by the motivation to increase PAD. Regions do not seem to realize that such imposition in an excessive extent will harm their own regions as the investors will keep away from them.*
11. *Compared to investment attractiveness rating on regions conducted by KPPOD in the previous year, 2001, violation on the principle of free internal trade is relatively low now (2.3%). This is a good indication of improvement of regional governments' attempt in encouraging investment in their regions. It also means that regional governments have been inclined to consider free trade principles*

daerahnya. Ini juga berarti pemerintah daerah ada perbaikan dalam mengikuti prinsip perdagangan bebas WTO yang telah diterima Indonesia dalam UU No.7/1994.

12. Walaupun belum banyak daerah yang menerapkannya, namun upaya yang dilakukan beberapa pemerintah daerah di daerah penelitian dengan pelayanan satu atap (lengkap dengan kewenangan pengambilan keputusan) untuk investasi, menunjukkan ada daerah yang sudah peduli dengan peningkatan investasi melalui perbaikan pelayanan dunia usaha.
13. Selain pelayanan satu atap, upaya beberapa pemerintah daerah untuk mengemas potensi ekonomi daerahnya dengan memanfaatkan kemajuan teknologi informasi melalui pembuatan situs daerah cukup memberikan indikasi kesadaran daerah akan pentingnya investasi.
14. Penyediaan kawasan khusus untuk industri di beberapa daerah penelitian juga merupakan salah satu upaya positif yang dirintis pemerintah daerah dalam memfasilitasi kegiatan usaha bagi pertumbuhan ekonomi daerahnya.

## B. SARAN

1. Pemerintah daerah diharapkan melihat kembali secara mendalam indikator indikator yang dinilai masih lemah dari lima faktor yang diperingkat untuk peningkatan kinerjanya.
2. Pelayanan investasi satu atap yang sebenarnya (bukan satu atap namun masih memerlukan ijin dari berbagai instansi teknis) yang telah dijalankan di beberapa daerah perlu dikembangkan oleh daerah daerah lain.
3. Regulasi yang dibuat pemerintah daerah dalam hal kompensasi hak ulayat bisa menjadi contoh untuk dikembangkan beberapa variannya di daerah daerah lain guna menjamin kepastian berusaha.
4. Pelibatan dunia usaha dalam penyusunan Perda yang terkait dengan aktivitas usahanya mutlak diperlukan untuk menghindari hal hal yang kontraproduktif dalam pelaksanaannya.
5. Peran pengawasan represif pemerintah pusat yang

*endorsed by WTO which have been accepted by Indonesia though Law Number 7 Year 1994.*

12. *Even though many regions have not implemented it yet, effort by several regional governments in introducing one-stop service (completed with decision making authority) for investment showed that there have been regions paying serious attention in establishing favorable climate in their respective regions.*
13. *Besides one-stop service, efforts of several regional governments to provide well-packaged information on economic potentials of their regions using information technology websites indicates the presence of regional awareness on the importance of investment.*
14. *Availability of special industrial zones in several regions is one of the positive initiatives in facilitating business activity for the economic growth of the regions.*

## B. RECOMMENDATIONS

1. *Regional governments should pay serious attention to indicators under five factors that are weak from the perception of business community to improve their performance.*
2. *Regions need to develop one-stop service, a real one that does not require approval from other technical institutions as has been implemented in several regions.*
3. *Regulations on customary rights compensation as have been successfully provided by several regions should be shared in terms of its substance to other regions, helping them in solving problems of similar kind so as to further guarantee business certainty.*
4. *Involvement of business community in the formulation of regional regulation related to business activity is a required condition if the absence of counterproductive regional regulations is to be ensured.*
5. *The role of central government in applying repressive control towards distorting regional*

tegas terhadap Perda yang distortif bagi aktivitas usaha sangat diperlukan, tidak saja untuk melindungi kelangsungan usaha, namun juga untuk pengembangan potensi ekonomi daerah yang bersangkutan dalam jangka panjang, baik dalam hal penyerapan tenaga kerja, pemasukan pajak, maupun *multiplier effect* positif lainnya dari adanya investasi.

6. Di sisi lain, rendahnya PAD yang mendorong munculnya Perda distortif perlu mendorong pemerintah pusat untuk memikirkan alternatif bagi perluasan basis pajak daerah yang saat ini masih marginal, atau memberikan porsi yang lebih besar untuk dana perimbangan bagi daerah.

*regulations is highly needed, not only for the protection of business sustainability but also for long-term development of regional economic potential, which is important in terms of job creation, revenue from tax, or other positive multiplier effects of investment.*

6. *The fact that low Original Regional Revenue (PAD) is the factor behind the imposition of distorting regional regulations is intended to the central government to extend the tax bases for regions, which are up to now still marginal, or to provide more share in balancing funds for regions.*



# Lampiran 1 Hasil Pemeringkatan

## Lampiran 1.1.

### Peringkat Daya Tarik Investasi 134 Kabupaten/Kota di Indonesia Berdasar Nilai Total

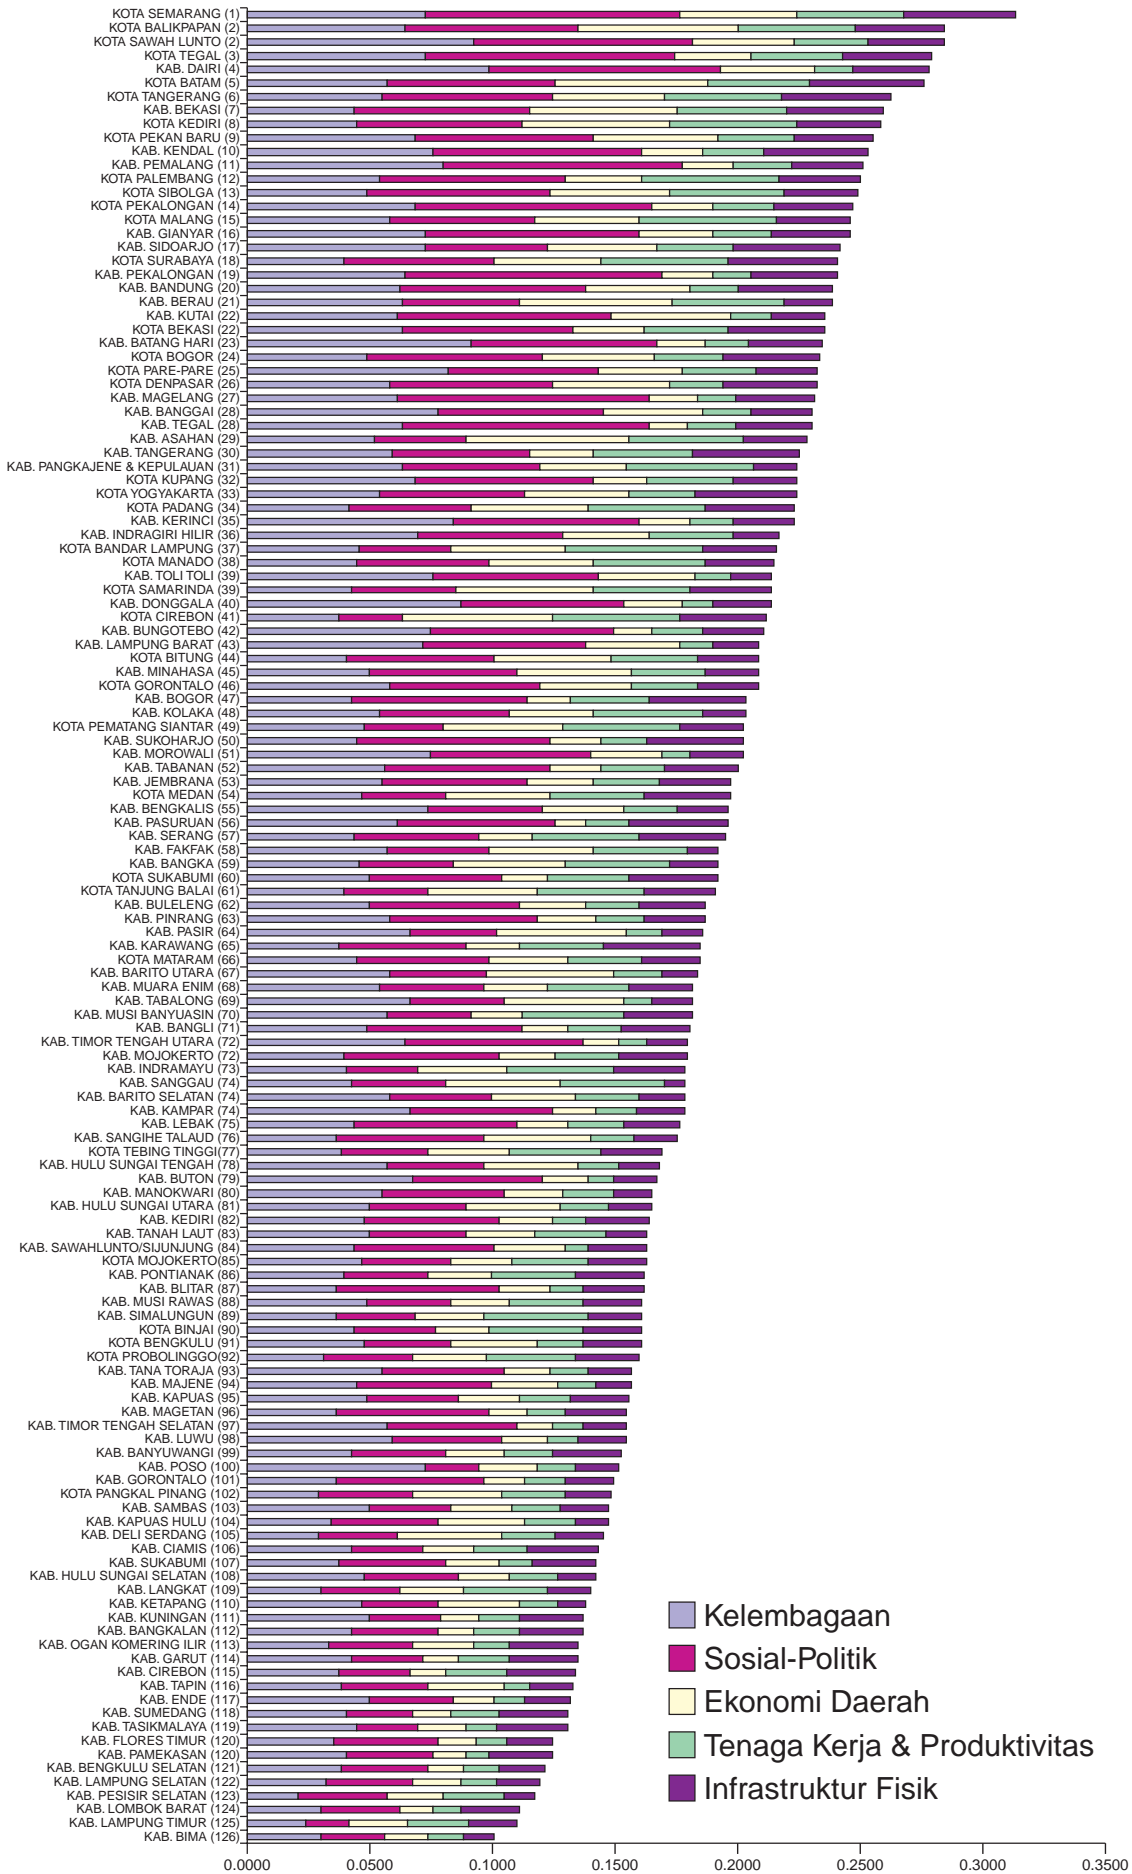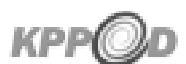

Lampiran 1.1.1.

Neraca Faktor Peringkat Daya Tarik Investasi 134 Kabupaten/Kota

| NO. | PROPINSI            | KABUPATEN/KOTA                   | FAKTOR      |                |                |                              |                     |
|-----|---------------------|----------------------------------|-------------|----------------|----------------|------------------------------|---------------------|
|     |                     |                                  | KELEMBAGAAN | SOSIAL-POLITIK | EKONOMI DAERAH | TENAGA KERJA & PRODUKTIVITAS | INFRASTRUKTUR FISIK |
| 1   | JAWA TENGAH         | KOTA SEMARANG (1)                | 14          | 3              | 12             | 16                           | 2                   |
| 2   | KALIMANTAN TIMUR    | KOTA BALIKPAPAN (2)              | 26          | 21             | 2              | 5                            | 14                  |
| 3   | SUMATERA BARAT      | KOTA SAWAH LUNTO (2)             | 2           | 9              | 34             | 41                           | 26                  |
| 4   | JAWA TENGAH         | KOTA TEGAL (3)                   | 15          | 4              | 53             | 26                           | 15                  |
| 5   | SUMATERA UTARA      | KAB. DAIRI (4)                   | 1           | 8              | 39             | 96                           | 13                  |
| 6   | R I A U             | KOTA BATAM (5)                   | 44          | 24             | 3              | 20                           | 1                   |
| 7   | BANTEN              | KOTA TANGERANG (6)               | 50          | 22             | 22             | 4                            | 3                   |
| 8   | JAWA BARAT          | KAB. BEKASI (7)                  | 80          | 20             | 6              | 12                           | 9                   |
| 9   | JAWA TIMUR          | KOTA KEDIRI (8)                  | 75          | 25             | 6              | 4                            | 19                  |
| 10  | R I A U             | KOTA PEKAN BARU (9)              | 20          | 18             | 10             | 38                           | 24                  |
| 11  | JAWA TENGAH         | KAB. KENDAL (10)                 | 10          | 12             | 69             | 53                           | 5                   |
| 12  | JAWA TENGAH         | KAB. PEMALANG (11)               | 7           | 6              | 83             | 60                           | 32                  |
| 13  | SUMATERA SELATAN    | KOTA PALEMBANG (12)              | 54          | 14             | 54             | 1                            | 21                  |
| 14  | SUMATERA UTARA      | KOTA SIBOLGA (13)                | 63          | 17             | 14             | 8                            | 26                  |
| 15  | JAWA TENGAH         | KOTA PEKALONGAN (14)             | 21          | 7              | 71             | 53                           | 22                  |
| 16  | JAWA TIMUR          | KOTA MALANG (15)                 | 40          | 42             | 30             | 2                            | 28                  |
| 17  | BALI                | KAB. GIANYAR (16)                | 17          | 10             | 56             | 59                           | 13                  |
| 18  | JAWA TIMUR          | KAB. SIDOARJO (17)               | 16          | 57             | 23             | 39                           | 4                   |
| 19  | JAWA TIMUR          | KOTA SURABAYA (18)               | 91          | 40             | 26             | 3                            | 2                   |
| 20  | JAWA TENGAH         | KAB. PEKALONGAN (19)             | 27          | 1              | 85             | 90                           | 18                  |
| 21  | BALI                | KAB. BADUNG (20)                 | 31          | 16             | 27             | 80                           | 10                  |
| 22  | KALIMANTAN TIMUR    | KAB. BERAU (21)                  | 30          | 61             | 4              | 11                           | 67                  |
| 23  | KALIMANTAN TIMUR    | KAB. KUTAI (22)                  | 32          | 11             | 13             | 86                           | 59                  |
| 24  | JAWA BARAT          | KOTA BEKASI (22)                 | 28          | 23             | 58             | 31                           | 9                   |
| 25  | J A M B I           | KAB. BATANGHARI (23)             | 3           | 15             | 88             | 82                           | 28                  |
| 26  | JAWA BARAT          | KOTA BOGOR (24)                  | 65          | 20             | 18             | 47                           | 9                   |
| 27  | SULAWESI SELATAN    | KOTA PARE-PARE (25)              | 6           | 36             | 46             | 45                           | 46                  |
| 28  | BALI                | KOTA DENPASAR (26)               | 39          | 29             | 16             | 63                           | 11                  |
| 29  | JAWA TENGAH         | KAB. MAGELANG (27)               | 33          | 2              | 90             | 93                           | 22                  |
| 30  | SULAWESI TENGAH     | KAB. BANGGAI (28)                | 8           | 27             | 35             | 76                           | 50                  |
| 31  | JAWA TENGAH         | KAB. TEGAL (28)                  | 29          | 5              | 111            | 74                           | 25                  |
| 32  | SUMATERA UTARA      | KAB. ASAHAN (29)                 | 55          | 74             | 1              | 10                           | 41                  |
| 33  | BANTEN              | KAB. TANGERANG (30)              | 36          | 47             | 65             | 21                           | 3                   |
| 34  | SULAWESI SELATAN    | KAB. PANGKAJENE & KEPULAUAN (31) | 30          | 48             | 43             | 4                            | 75                  |
| 35  | NUSA TENGGARA TIMUR | KOTA KUPANG (32)                 | 21          | 19             | 81             | 28                           | 43                  |
| 36  | D.I. YOGYAKARTA     | KOTA YOGYAKARTA (33)             | 52          | 44             | 33             | 48                           | 6                   |
| 37  | SUMATERA BARAT      | KOTA PADANG (34)                 | 87          | 58             | 16             | 6                            | 12                  |
| 38  | J A M B I           | KAB. KERINCI (35)                | 5           | 15             | 82             | 83                           | 49                  |
| 39  | R I A U             | KAB. INDRAGIRI HILIR (36)        | 19          | 45             | 45             | 30                           | 71                  |
| 40  | LAMPUNG             | KOTA BANDAR LAMPUNG (37)         | 73          | 73             | 20             | 1                            | 29                  |
| 41  | SULAWESI UTARA      | KOTA MANADO (38)                 | 74          | 51             | 31             | 9                            | 38                  |
| 42  | SULAWESI TENGAH     | KAB. TOLI TOLI (39)              | 9           | 27             | 36             | 101                          | 79                  |
| 43  | KALIMANTAN TIMUR    | KOTA SAMARINDA (39)              | 83          | 67             | 7              | 22                           | 20                  |
| 44  | SULAWESI TENGAH     | KAB. DONGGALA (40)               | 4           | 27             | 76             | 108                          | 56                  |
| 45  | JAWA BARAT          | KOTA CIREBON (41)                | 99          | 92             | 5              | 3                            | 17                  |
| 46  | J A M B I           | KAB. BUNGOTEBO (42)              | 11          | 15             | 113            | 70                           | 47                  |
| 47  | LAMPUNG             | KAB. LAMPUNG BARAT (43)          | 18          | 29             | 38             | 105                          | 73                  |
| 48  | SULAWESI UTARA      | KOTA BITUNG (44)                 | 89          | 41             | 15             | 29                           | 48                  |
| 49  | SULAWESI UTARA      | KAB. MINAHASA (45)               | 61          | 41             | 17             | 42                           | 62                  |
| 50  | GORONTALO           | KOTA GORONTALO (46)              | 38          | 37             | 41             | 49                           | 53                  |
| 51  | JAWA BARAT          | KAB. BOGOR (47)                  | 86          | 20             | 96             | 36                           | 9                   |
| 52  | SULAWESI TENGGARA   | KAB. KOLAKA (48)                 | 53          | 53             | 47             | 13                           | 78                  |
| 53  | SUMATERA UTARA      | KOTA PEMATANG SIANTAR (49)       | 68          | 86             | 11             | 7                            | 41                  |
| 54  | JAWA TENGAH         | KAB. SUKOHARJO (50)              | 75          | 13             | 85             | 81                           | 8                   |
| 55  | SULAWESI TENGAH     | KAB. MOROWALI (51)               | 12          | 30             | 59             | 113                          | 61                  |
| 56  | BALI                | KAB. TABANAN (52)                | 47          | 26             | 82             | 54                           | 27                  |
| 57  | BALI                | KAB. JEMBRANA (53)               | 51          | 43             | 62             | 50                           | 30                  |
| 58  | SUMATERA UTARA      | KOTA MEDAN (54)                  | 71          | 83             | 29             | 23                           | 18                  |
| 59  | R I A U             | KAB. BENGKALIS (55)              | 13          | 62             | 49             | 62                           | 63                  |
| 60  | JAWA TIMUR          | KAB. PASURUAN (56)               | 34          | 32             | 119            | 85                           | 7                   |
| 61  | BANTEN              | KAB. SERANG (57)                 | 80          | 56             | 80             | 17                           | 16                  |
| 62  | PAPUA               | KAB. FAKFAK (58)                 | 46          | 68             | 28             | 25                           | 90                  |
| 63  | BANGKA BELITUNG     | KAB. BANGKA (59)                 | 72          | 71             | 21             | 18                           | 68                  |
| 64  | JAWA BARAT          | KOTA SUKABUMI (60)               | 59          | 52             | 89             | 37                           | 13                  |
| 65  | SUMATERA UTARA      | KOTA TANJUNG BALAI (61)          | 94          | 80             | 24             | 15                           | 32                  |
| 66  | BALI                | KAB. BULELENG (62)               | 59          | 38             | 62             | 66                           | 39                  |
| 67  | SULAWESI SELATAN    | KAB. PINRANG (63)                | 42          | 39             | 76             | 72                           | 51                  |

|     |                     |                                |     |    |     |     |    |
|-----|---------------------|--------------------------------|-----|----|-----|-----|----|
| 68  | KALIMANTAN TIMUR    | KAB. PASIR (64)                | 24  | 78 | 8   | 101 | 82 |
| 69  | JAWA BARAT          | KAB. KARAWANG (65)             | 99  | 55 | 79  | 33  | 9  |
| 70  | NUSA TENGGARA BARAT | KOTA MATARAM (66)              | 77  | 50 | 51  | 43  | 56 |
| 71  | KALIMANTAN TENGAH   | KAB. BARITO UTARA (67)         | 37  | 71 | 9   | 73  | 87 |
| 72  | SUMATERA SELATAN    | KAB. MUARA ENIM (68)           | 54  | 66 | 64  | 35  | 40 |
| 73  | KALIMANTAN SELATAN  | KAB. TABALONG (69)             | 23  | 71 | 13  | 112 | 82 |
| 74  | SUMATERA SELATAN    | KAB. MUSI BANYUASIN (70)       | 43  | 84 | 87  | 19  | 35 |
| 75  | BALI                | KAB. BANGLI (71)               | 63  | 34 | 92  | 64  | 33 |
| 76  | NUSA TENGGARA TIMUR | KAB. TIMOR TENGAH UTARA (72)   | 25  | 19 | 114 | 112 | 83 |
| 77  | JAWA TIMUR          | KAB. MOJOKERTO (72)            | 92  | 33 | 76  | 51  | 37 |
| 78  | JAWA BARAT          | KAB. INDRAMAYU (73)            | 88  | 89 | 42  | 14  | 31 |
| 79  | KALIMANTAN BARAT    | KAB. SANGGAU (74)              | 84  | 72 | 19  | 18  | 93 |
| 80  | KALIMANTAN TENGAH   | KAB. BARITO SELATAN (74)       | 41  | 69 | 48  | 50  | 72 |
| 81  | R I A U             | KAB. KAMPAR (74)               | 23  | 45 | 95  | 89  | 66 |
| 82  | BANTEN              | KAB. LEBAK (75)                | 79  | 31 | 82  | 61  | 59 |
| 83  | SULAWESI UTARA      | KAB. SANGIHE TALAUD (76)       | 102 | 41 | 25  | 87  | 76 |
| 84  | SUMATERA UTARA      | KOTA TEBING TINGGI (77)        | 95  | 80 | 51  | 24  | 50 |
| 85  | KALIMANTAN SELATAN  | KAB. HULU SUNGAI TENGAH (78)   | 45  | 71 | 37  | 91  | 82 |
| 86  | SULAWESI TENGGARA   | KAB. BUTON (79)                | 22  | 53 | 94  | 115 | 81 |
| 87  | PAPUA               | KAB. MANOKWARI (80)            | 49  | 59 | 72  | 70  | 85 |
| 88  | KALIMANTAN SELATAN  | KAB. HULU SUNGAI UTARA (81)    | 56  | 71 | 40  | 71  | 82 |
| 89  | JAWA TIMUR          | KAB. KEDIRI (82)               | 67  | 49 | 82  | 102 | 45 |
| 90  | KALIMANTAN SELATAN  | KAB. TANAH LAUT (83)           | 56  | 70 | 61  | 46  | 80 |
| 91  | SUMATERA BARAT      | KAB. SAWAHLUNTO/SIJUNJUNG (84) | 81  | 46 | 57  | 118 | 56 |
| 92  | JAWA TIMUR          | KOTA MOJOKERTO (85)            | 71  | 77 | 67  | 40  | 57 |
| 93  | KALIMANTAN BARAT    | KAB. PONTIANAK (86)            | 93  | 82 | 66  | 32  | 34 |
| 94  | JAWA TIMUR          | KAB. BLITAR (87)               | 102 | 28 | 84  | 109 | 45 |
| 95  | SUMATERA SELATAN    | KAB. MUSI RAWAS (88)           | 64  | 84 | 72  | 44  | 55 |
| 96  | SUMATERA UTARA      | KAB. SIMALUNGUN (89)           | 101 | 86 | 60  | 18  | 60 |
| 97  | SUMATERA UTARA      | KOTA BINJAI (90)               | 79  | 86 | 79  | 24  | 54 |
| 98  | BENGGULU            | KOTA BENGGULU (91)             | 66  | 80 | 46  | 79  | 58 |
| 99  | JAWA TIMUR          | KOTA PROBOLINGGO (92)          | 107 | 77 | 55  | 27  | 44 |
| 100 | SULAWESI SELATAN    | KAB. TANA TORAJA (93)          | 48  | 60 | 91  | 95  | 73 |
| 101 | SULAWESI SELATAN    | KAB. MAJENE (94)               | 76  | 48 | 63  | 94  | 86 |
| 102 | KALIMANTAN TENGAH   | KAB. KAPUAS (95)               | 62  | 76 | 68  | 69  | 52 |
| 103 | JAWA TIMUR          | KAB. MAGETAN (96)              | 100 | 35 | 112 | 98  | 45 |
| 104 | NUSA TENGGARA TIMUR | KAB. TIMOR TENGAH SELATAN (97) | 44  | 54 | 116 | 109 | 73 |
| 105 | SULAWESI SELATAN    | KAB. LUWU (98)                 | 35  | 63 | 93  | 107 | 68 |
| 106 | JAWA TIMUR          | KAB. BANYUWANGI (99)           | 85  | 71 | 75  | 78  | 34 |
| 107 | SULAWESI TENGAH     | KAB. POSO (100)                | 16  | 93 | 77  | 92  | 77 |
| 108 | GORONTALO           | KAB. GORONTALO (101)           | 102 | 41 | 97  | 88  | 65 |
| 109 | BANGKA BELITUNG     | KOTA PANGKAL PINANG (102)      | 111 | 71 | 44  | 52  | 68 |
| 110 | KALIMANTAN BARAT    | KAB. SAMBAS (103)              | 58  | 85 | 70  | 77  | 64 |
| 111 | KALIMANTAN BARAT    | KAB. KAPUAS HULU (104)         | 104 | 64 | 45  | 67  | 89 |
| 112 | SUMATERA UTARA      | KAB. DELI SERDANG (105)        | 112 | 86 | 32  | 63  | 65 |
| 113 | JAWA BARAT          | KAB. CIAMIS (106)              | 82  | 89 | 83  | 68  | 30 |
| 114 | JAWA BARAT          | KAB. SUKABUMI (107)            | 98  | 65 | 78  | 106 | 42 |
| 115 | KALIMANTAN SELATAN  | KAB. HULU SUNGAI SELATAN (108) | 69  | 71 | 82  | 79  | 84 |
| 116 | SUMATERA UTARA      | KAB. LANGKAT (109)             | 110 | 86 | 64  | 34  | 74 |
| 117 | KALIMANTAN BARAT    | KAB. KETAPANG (110)            | 70  | 88 | 50  | 97  | 92 |
| 118 | JAWA BARAT          | KAB. KUNINGAN (111)            | 57  | 89 | 100 | 84  | 44 |
| 119 | JAWA TIMUR          | KAB. BANGKALAN (112)           | 85  | 79 | 115 | 80  | 45 |
| 120 | SUMATERA SELATAN    | KAB. OGAN KOMERING ILIR (113)  | 106 | 84 | 73  | 99  | 35 |
| 121 | JAWA BARAT          | KAB. GARUT (114)               | 82  | 89 | 116 | 65  | 36 |
| 122 | JAWA BARAT          | KAB. CIREBON (115)             | 99  | 89 | 112 | 57  | 33 |
| 123 | KALIMANTAN SELATAN  | KAB. TAPIN (116)               | 96  | 80 | 52  | 116 | 82 |
| 124 | NUSA TENGGARA TIMUR | KAB. ENDE (117)                | 60  | 81 | 98  | 110 | 69 |
| 125 | JAWA BARAT          | KAB. SUMEDANG (118)            | 90  | 90 | 112 | 75  | 36 |
| 126 | JAWA BARAT          | KAB. TASIKMALAYA (119)         | 78  | 92 | 90  | 111 | 30 |
| 127 | NUSA TENGGARA TIMUR | KAB. FLORES TIMUR (120)        | 103 | 65 | 99  | 109 | 71 |
| 128 | JAWA TIMUR          | KAB. PAMEKASAN (120)           | 89  | 79 | 118 | 117 | 45 |
| 129 | BENGGULU            | KAB. BENGGULU SELATAN (121)    | 97  | 80 | 113 | 104 | 70 |
| 130 | LAMPUNG             | KAB. LAMPUNG SELATAN (122)     | 105 | 79 | 86  | 100 | 76 |
| 131 | SUMATERA BARAT      | KAB. PESISIR SELATAN (123)     | 114 | 75 | 78  | 58  | 88 |
| 132 | NUSA TENGGARA BARAT | KAB. LOMBOK BARAT (124)        | 109 | 87 | 117 | 114 | 52 |
| 133 | LAMPUNG             | KAB. LAMPUNG TIMUR (125)       | 113 | 94 | 74  | 55  | 65 |
| 134 | NUSA TENGGARA BARAT | KAB. BIMA (126)                | 108 | 91 | 95  | 103 | 91 |

**Peringkat 10 besar  
berdasarkan faktor**

**Peringkat 11 - 20  
berdasarkan faktor**

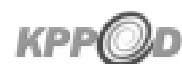







Lampiran 1.2.  
Peringkat Daya Tarik Investasi 97 Kabupaten di Indonesia Berdasar Nilai Total

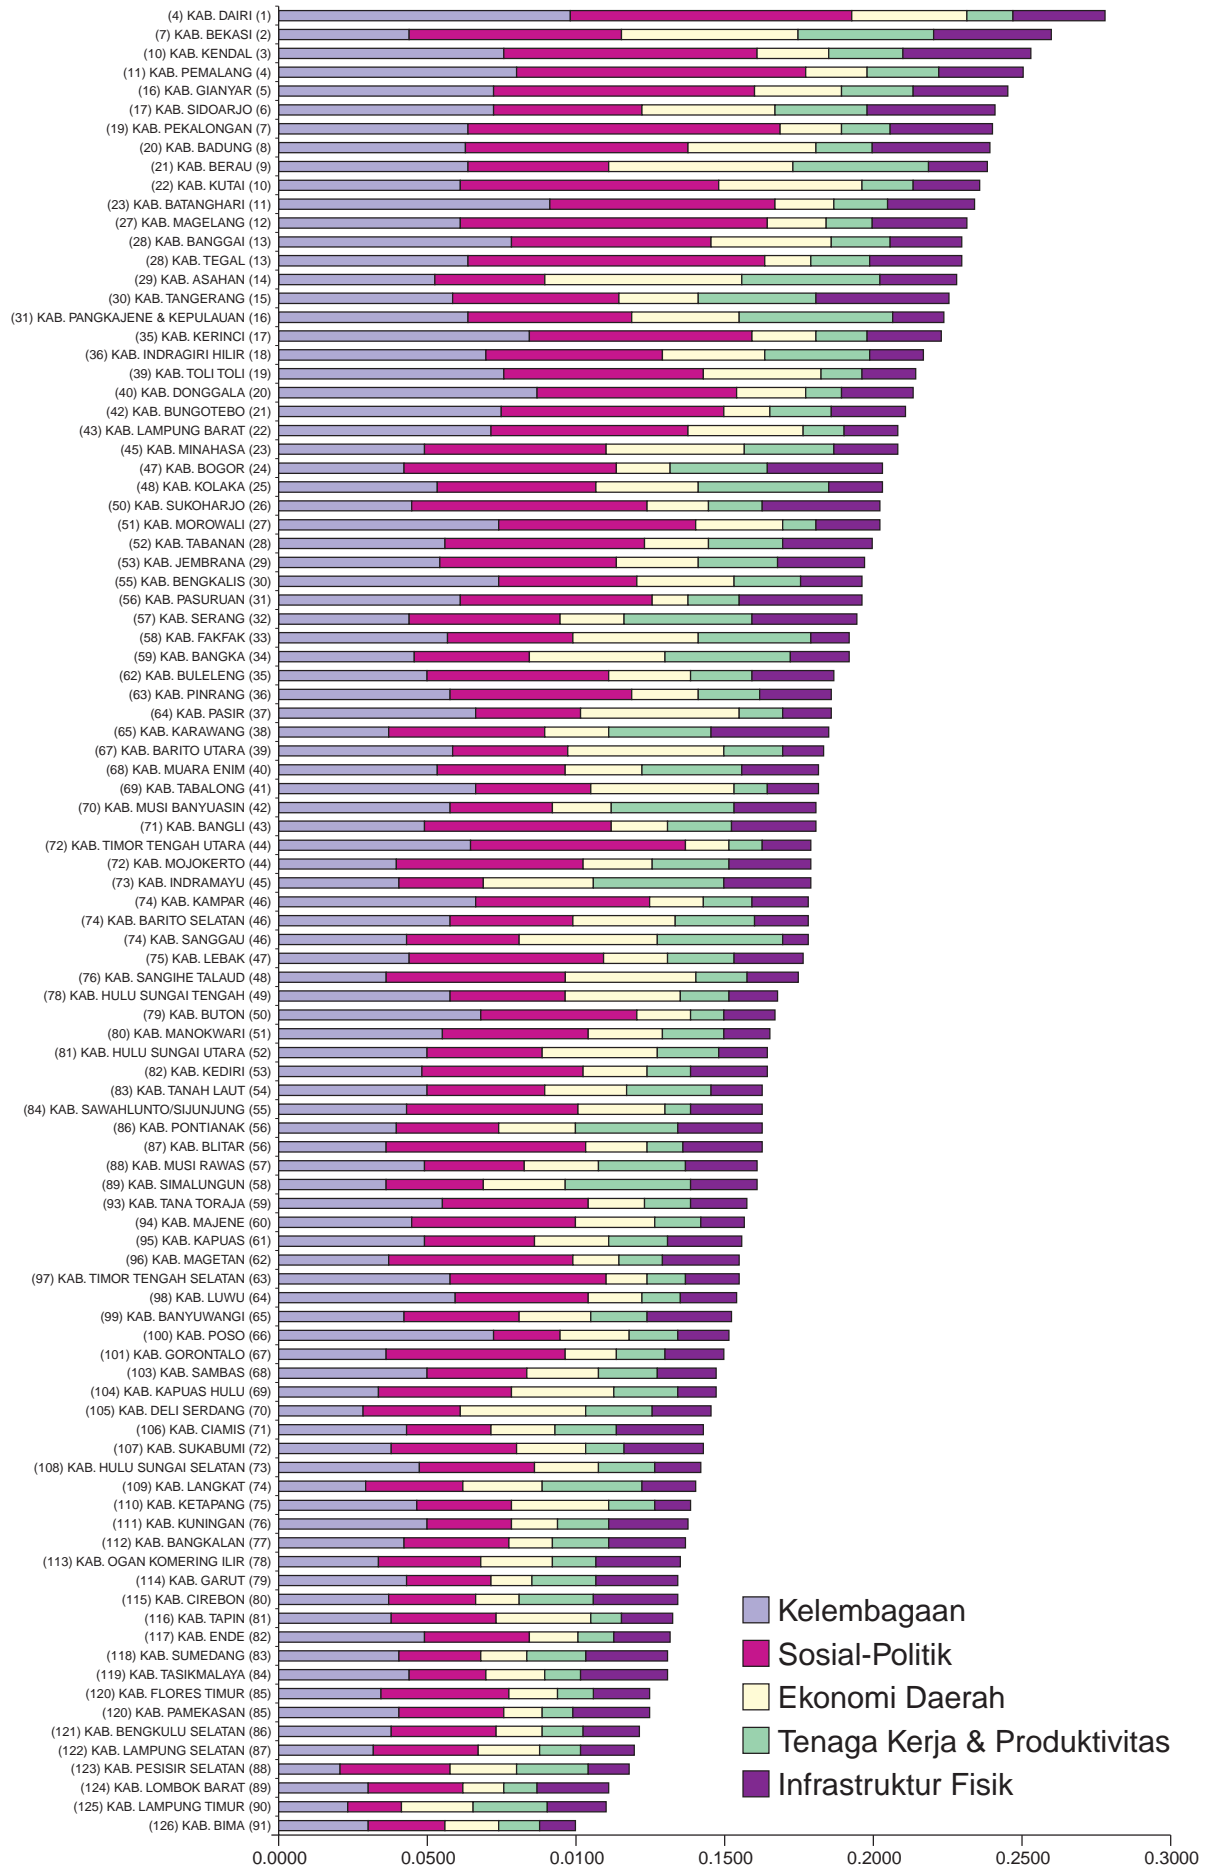



Lampiran 1.3.

Peringkat Daya Tarik Investasi 47 Kota di Indonesia Berdasar Nilai Total

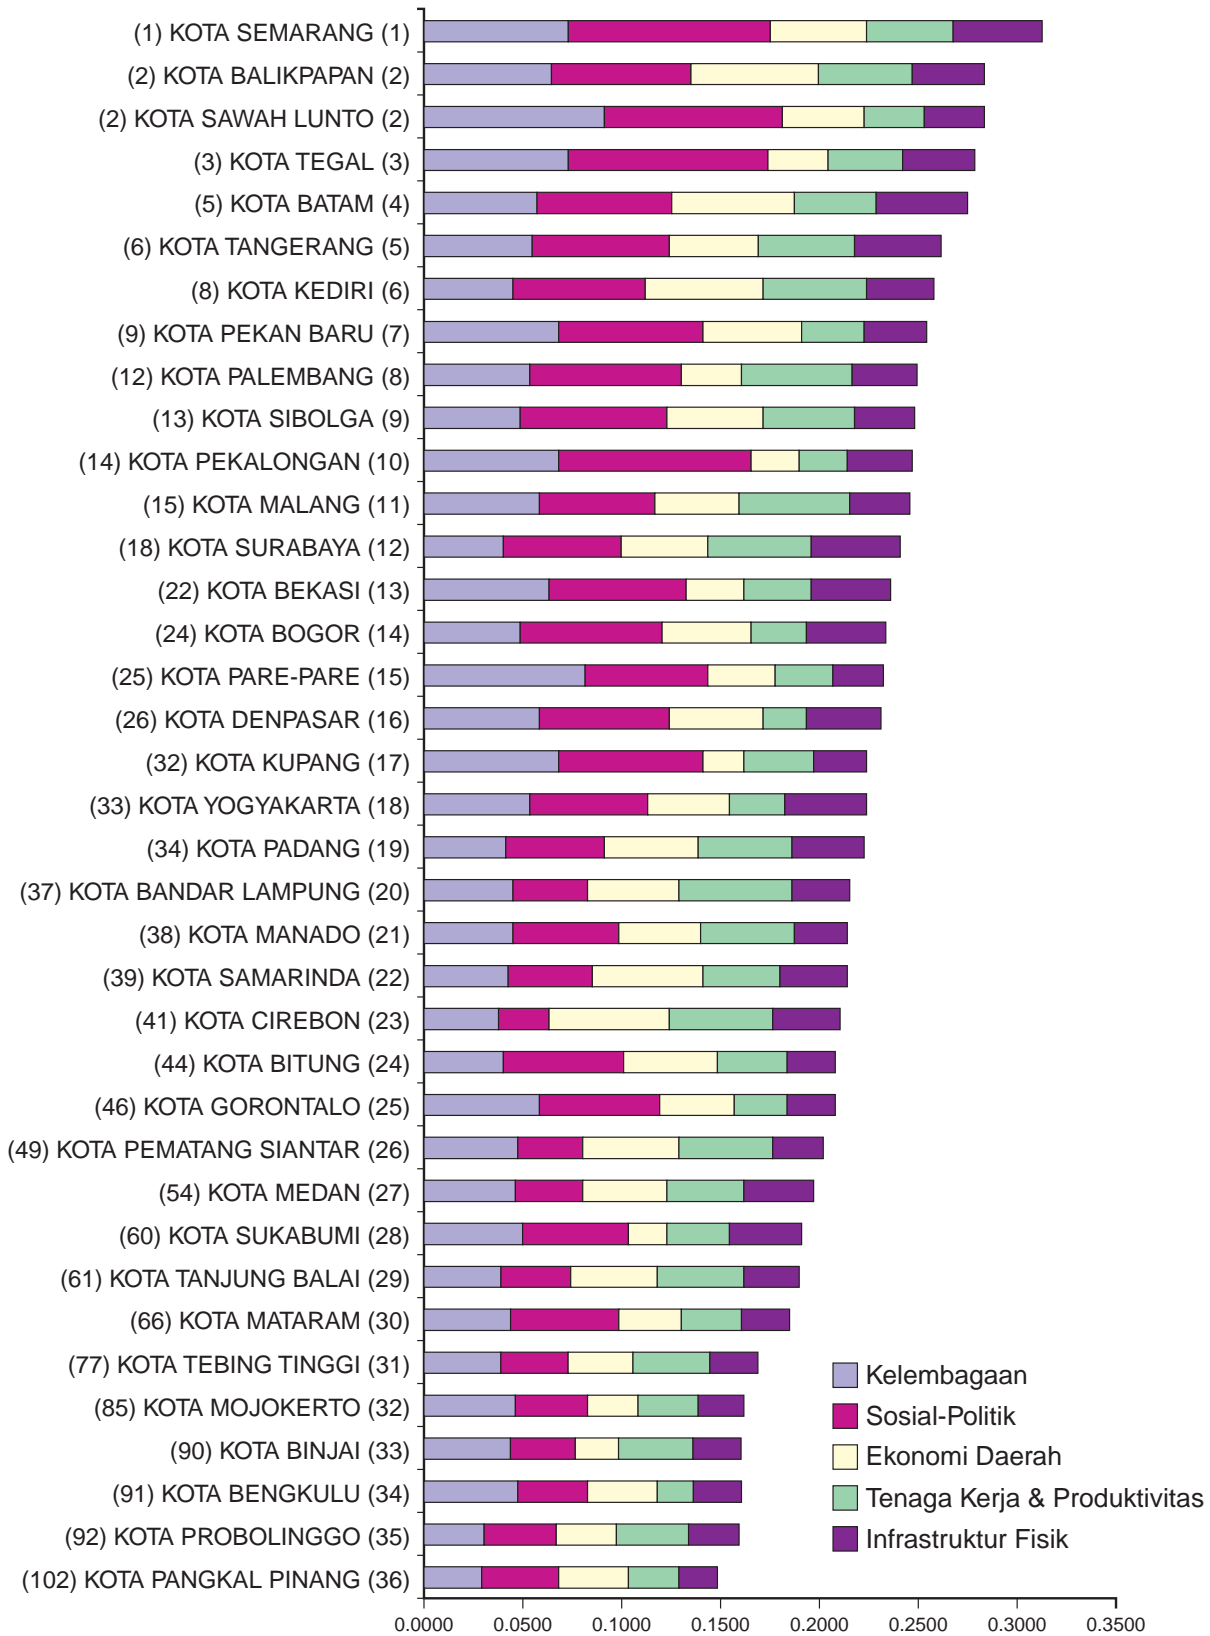

Lampiran 1.4.

Peringkat Daya Tarik Investasi Kabupaten/Kota di Pulau Jawa dan Bali Berdasar Nilai Total

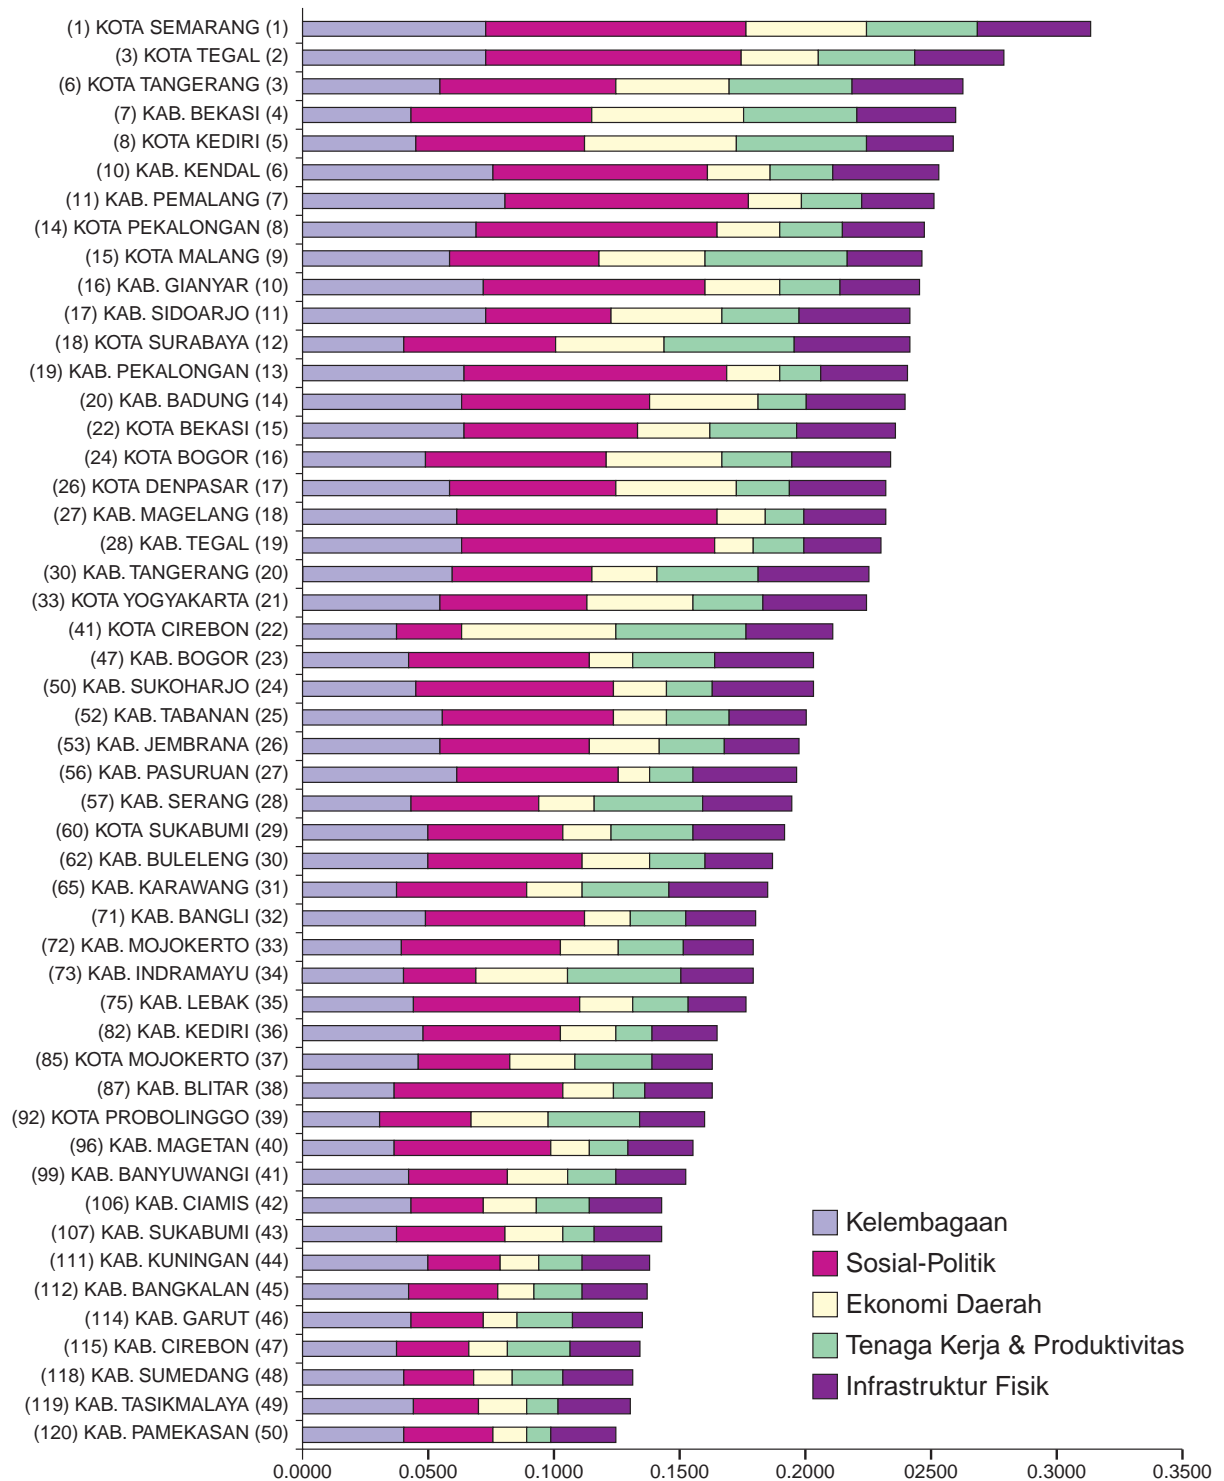

Lampiran 1.5.

Peringkat Daya Tarik Investasi Kabupaten/Kota di Luar Pulau Jawa dan Bali Berdasar Nilai Total

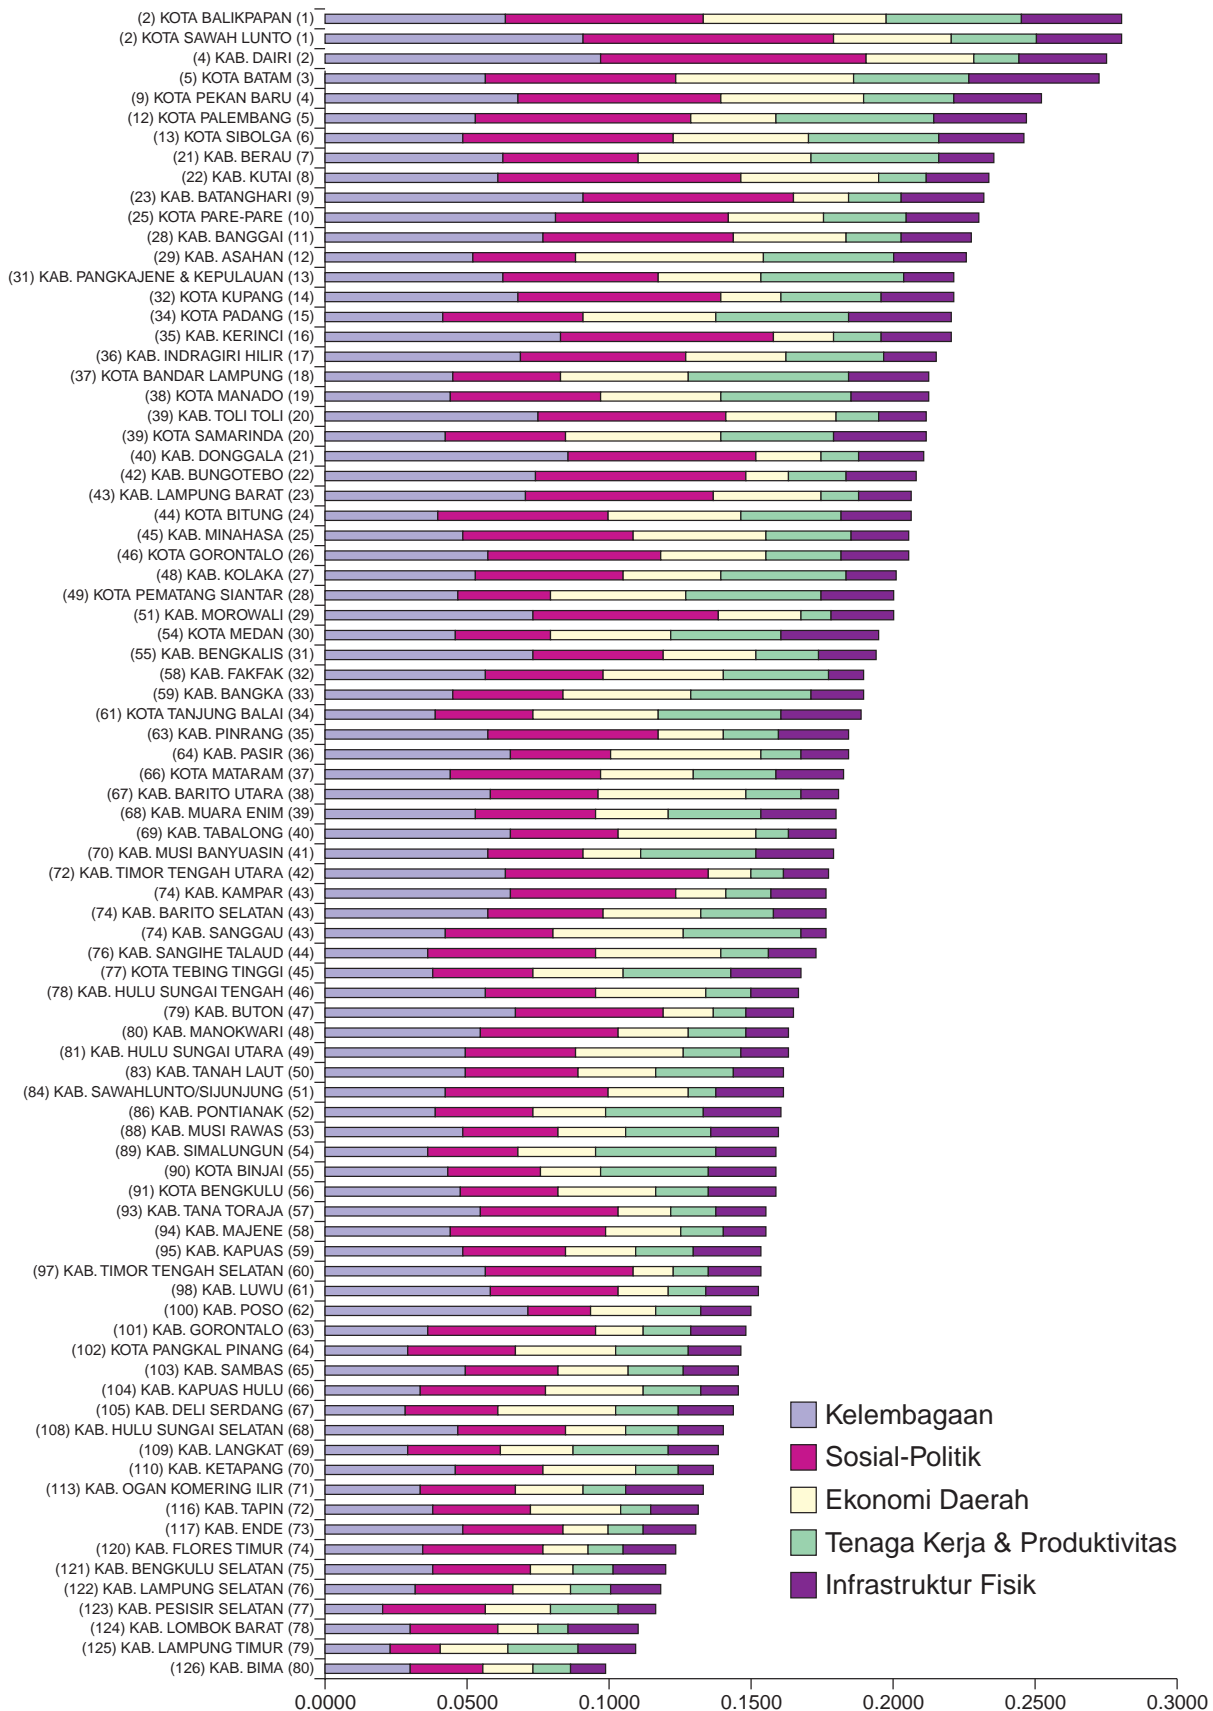

Lampiran 1.6.  
Peringkat Faktor Kelembagaan

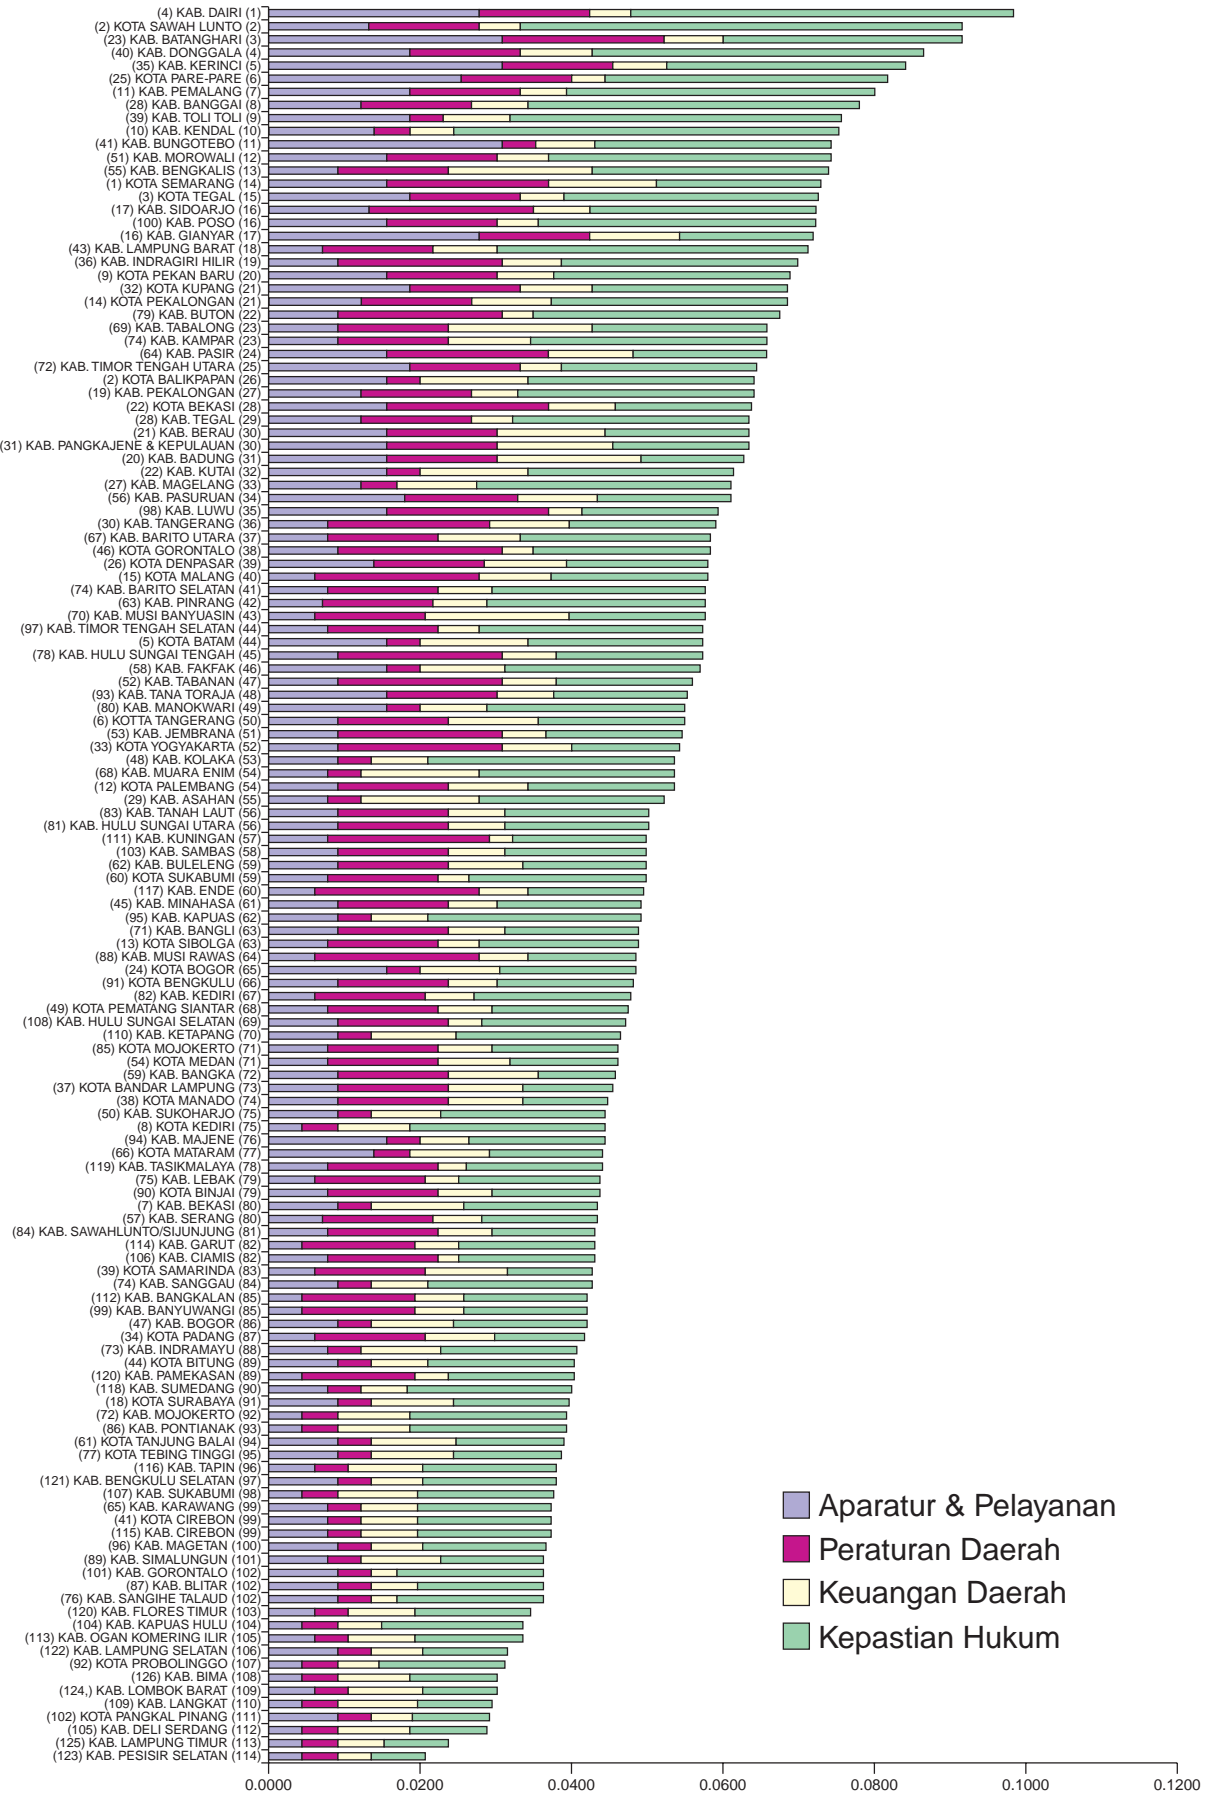



Lampiran 1.7.  
Peringkat Faktor Sosial-Politik

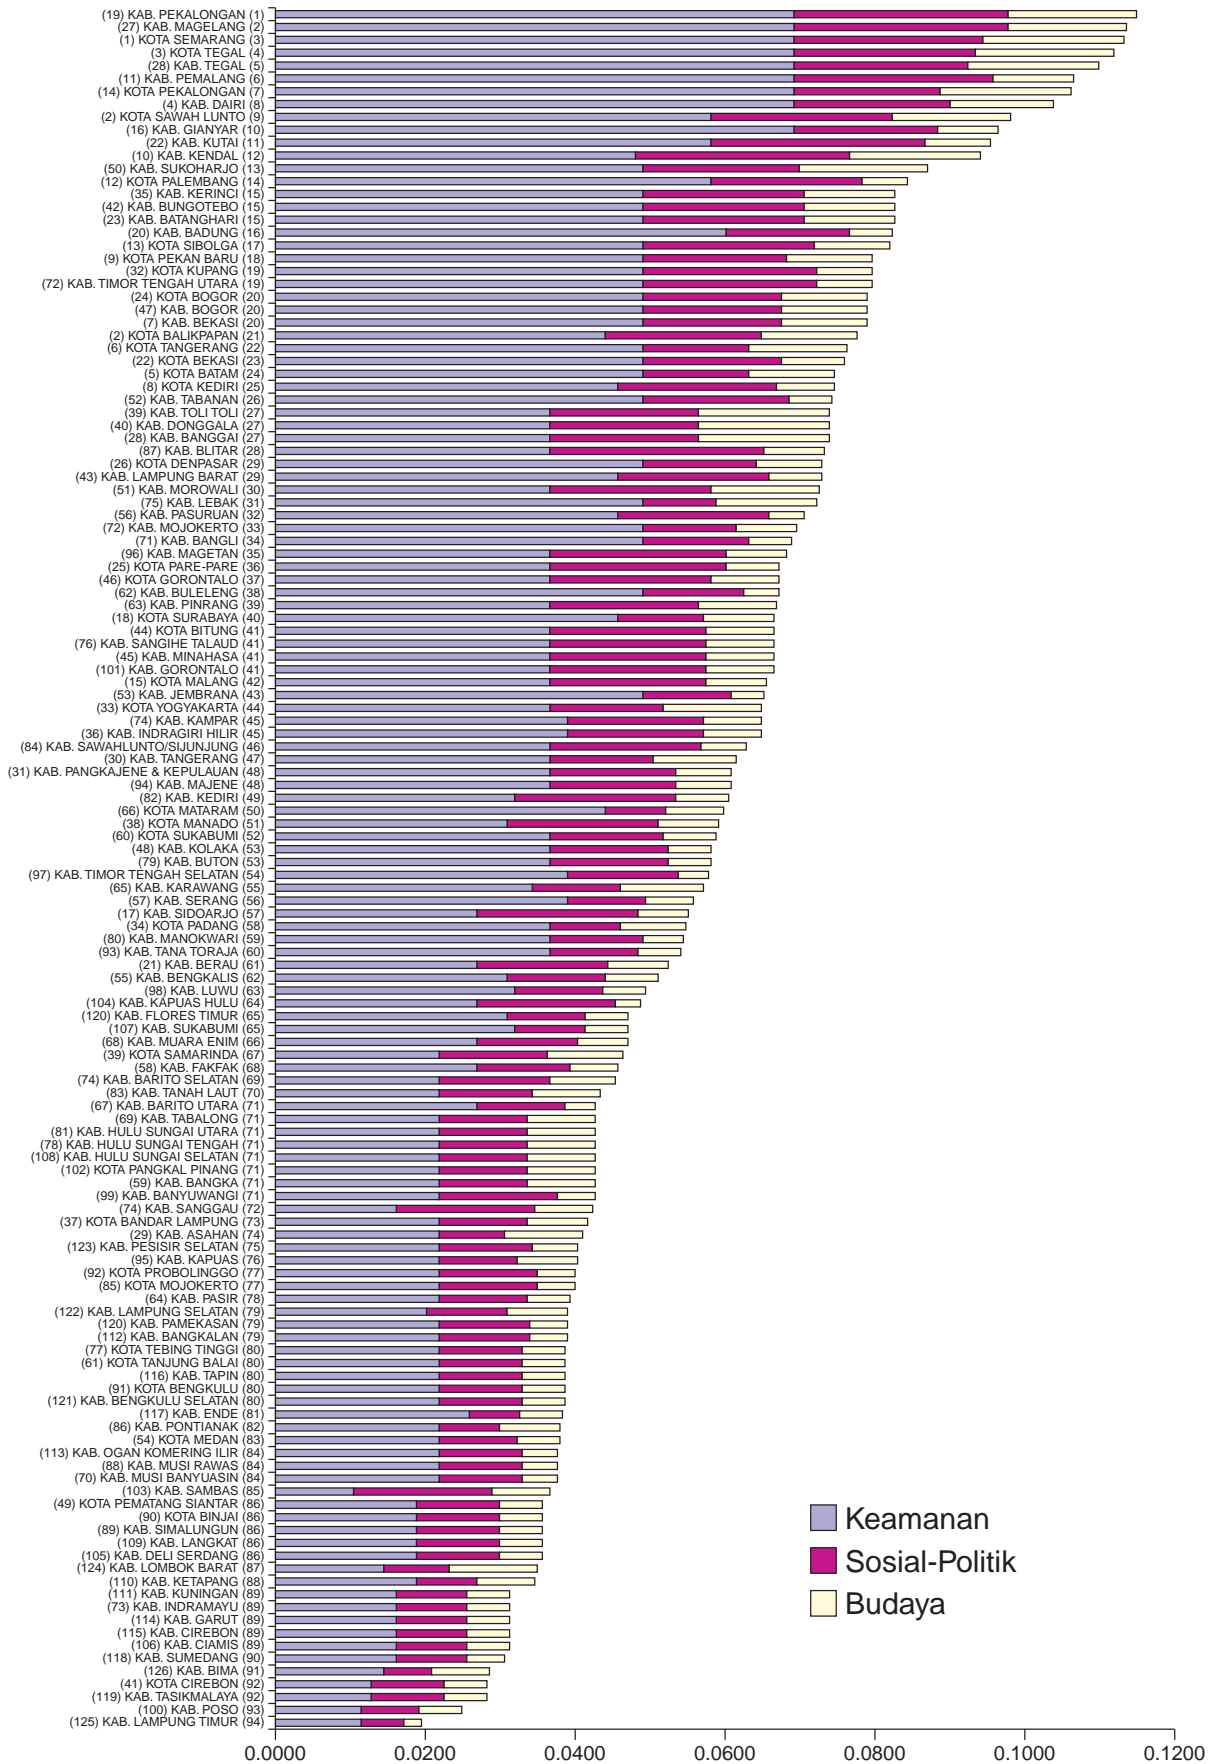

Lampiran 1.8.  
Peringkat Faktor Ekonomi Daerah

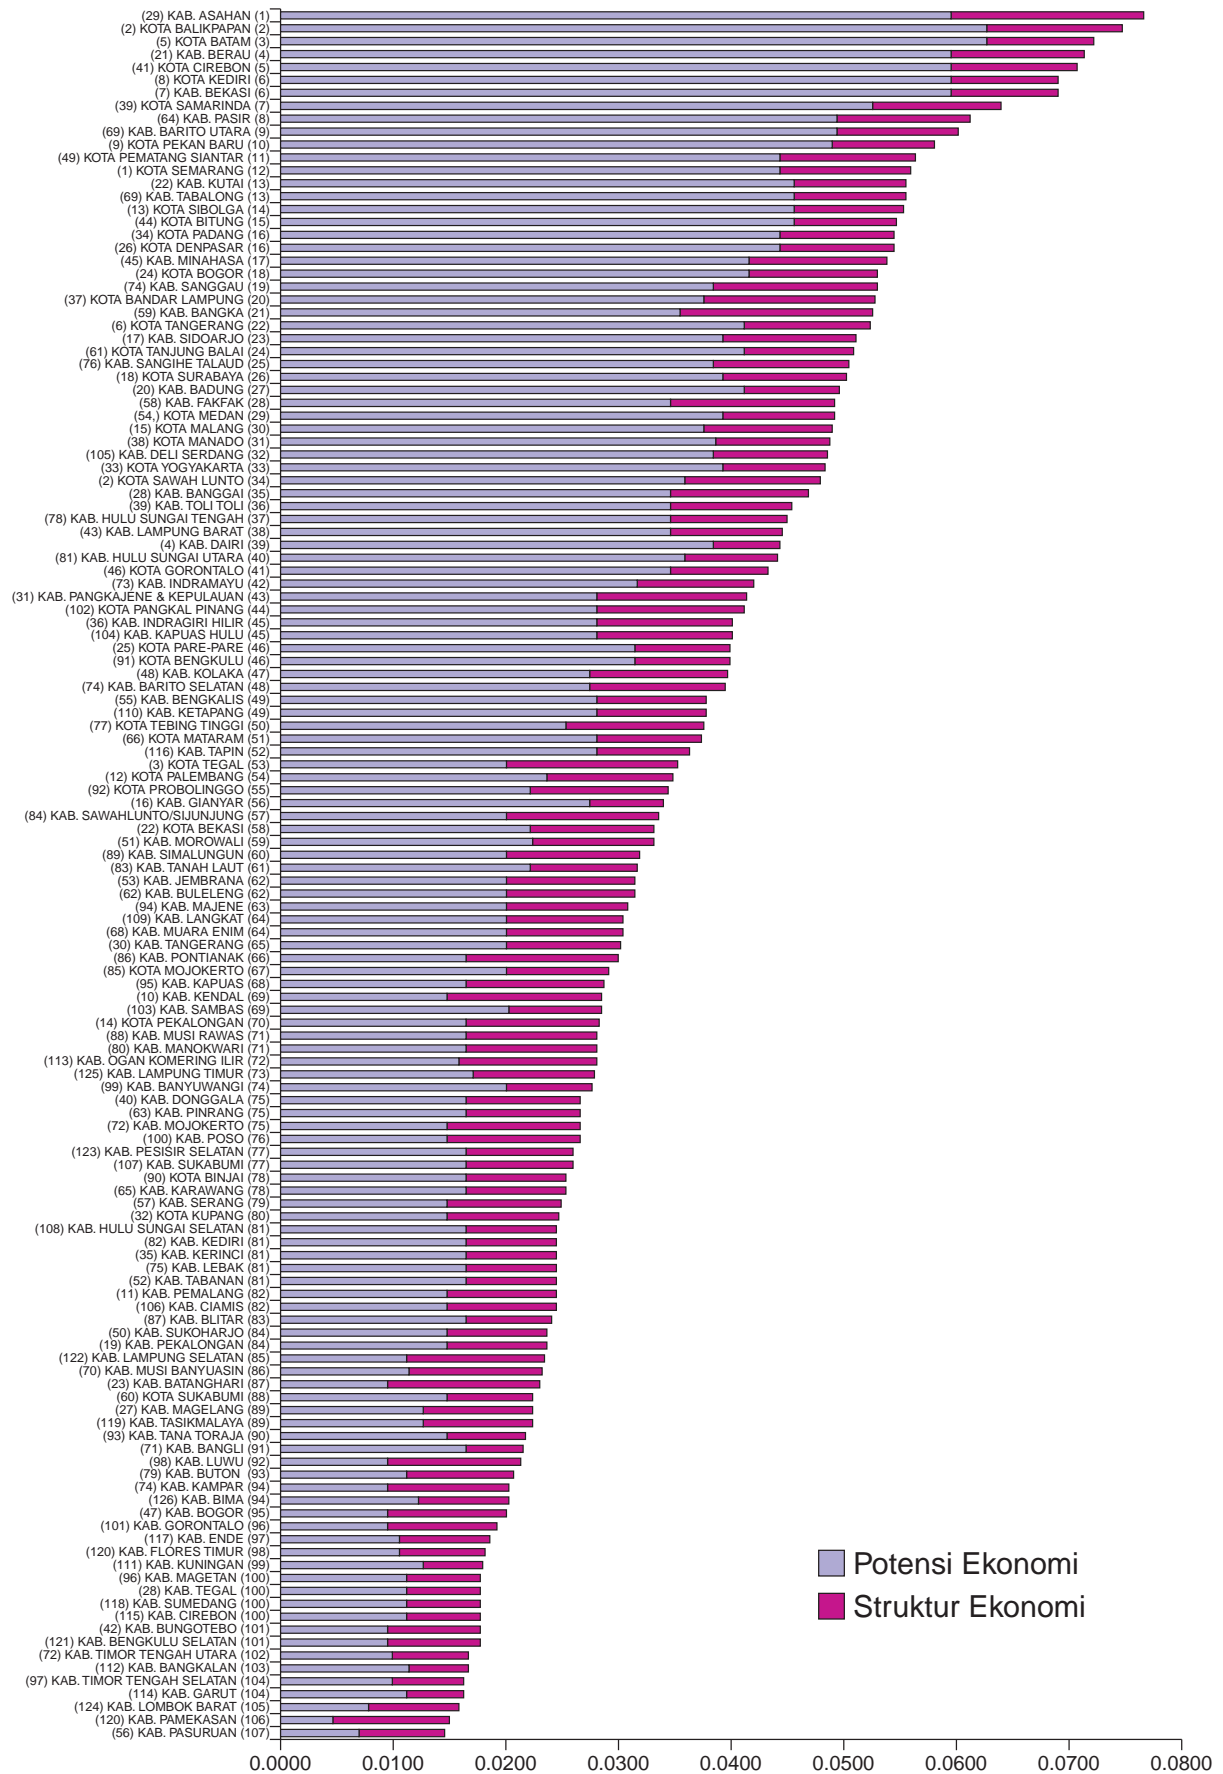

**Lampiran 1.9.**  
**Peringkat Faktor Tenaga Kerja dan Produktivitas**

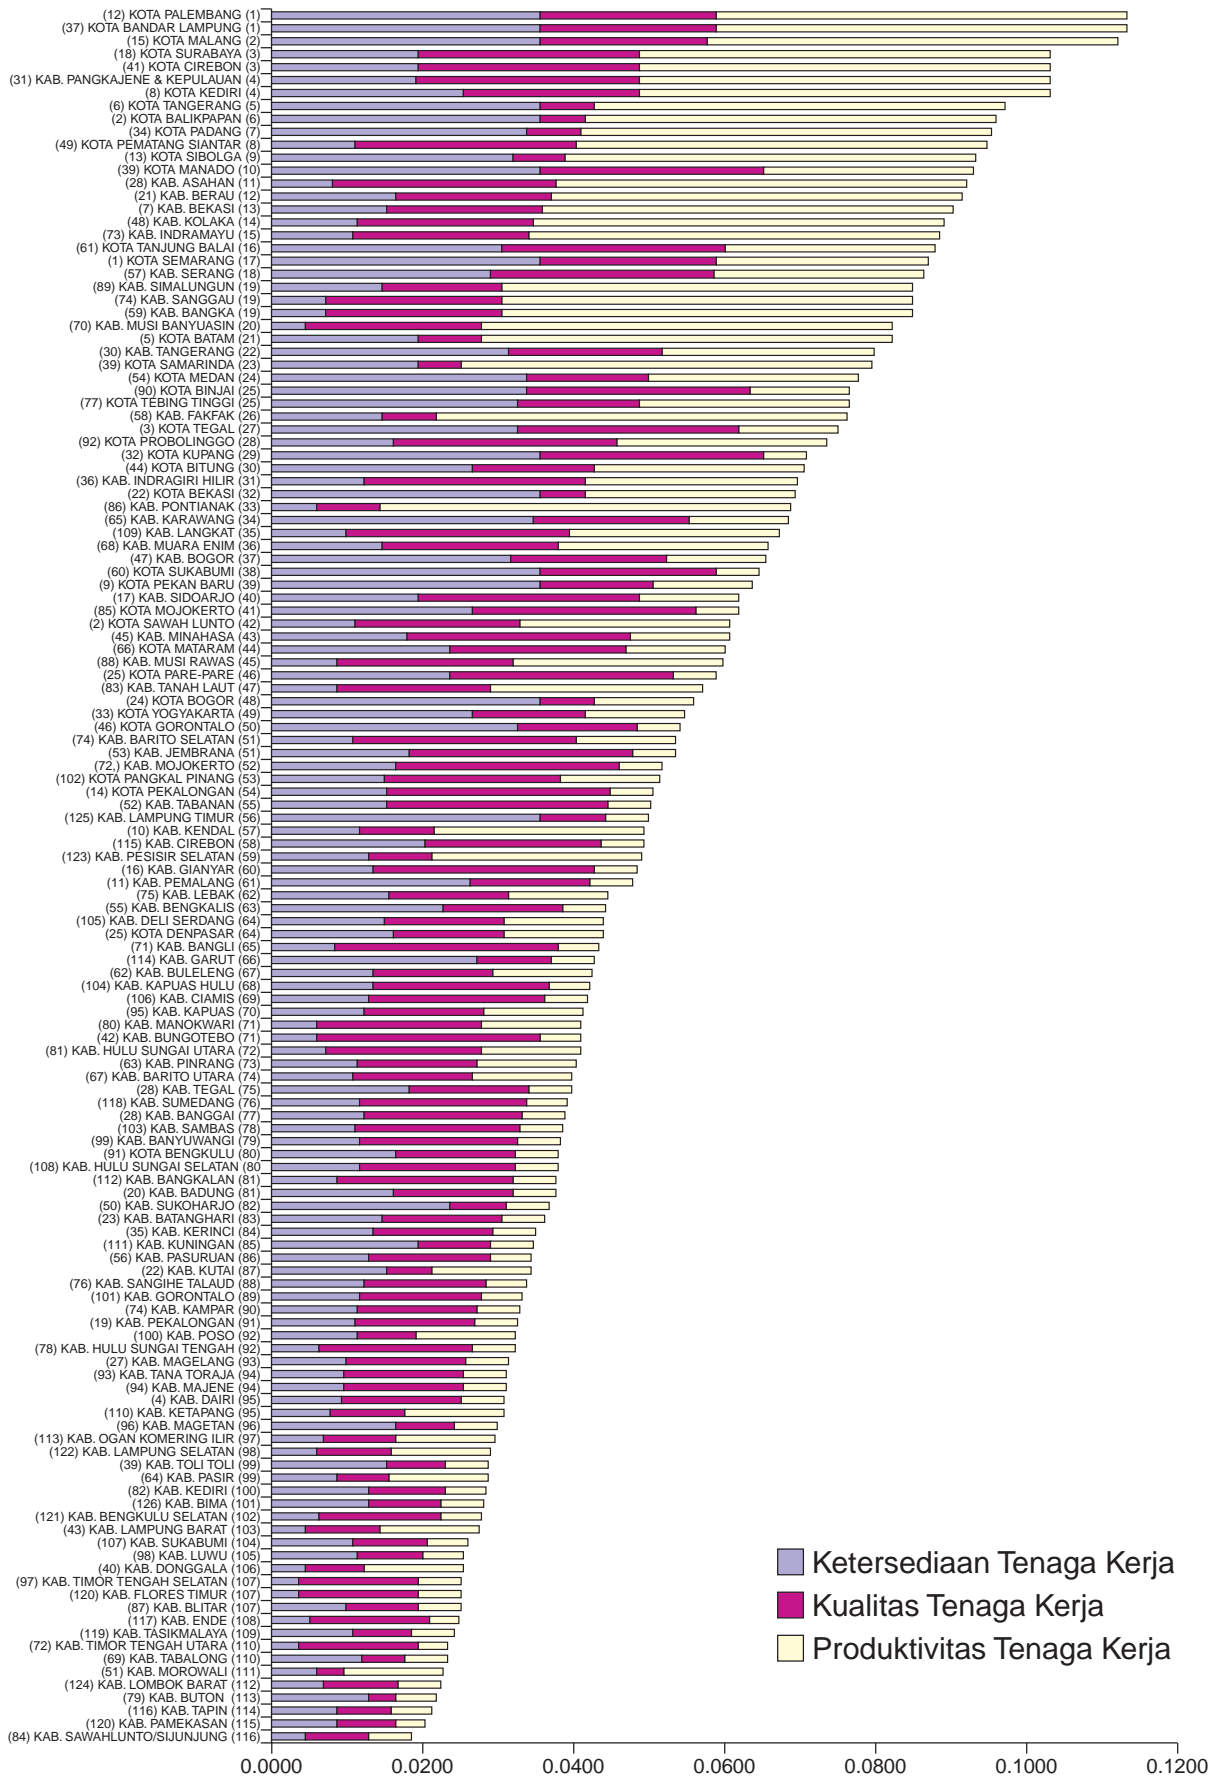

Lampiran 1.10.  
Peringkat Faktor Infrastruktur Fisik

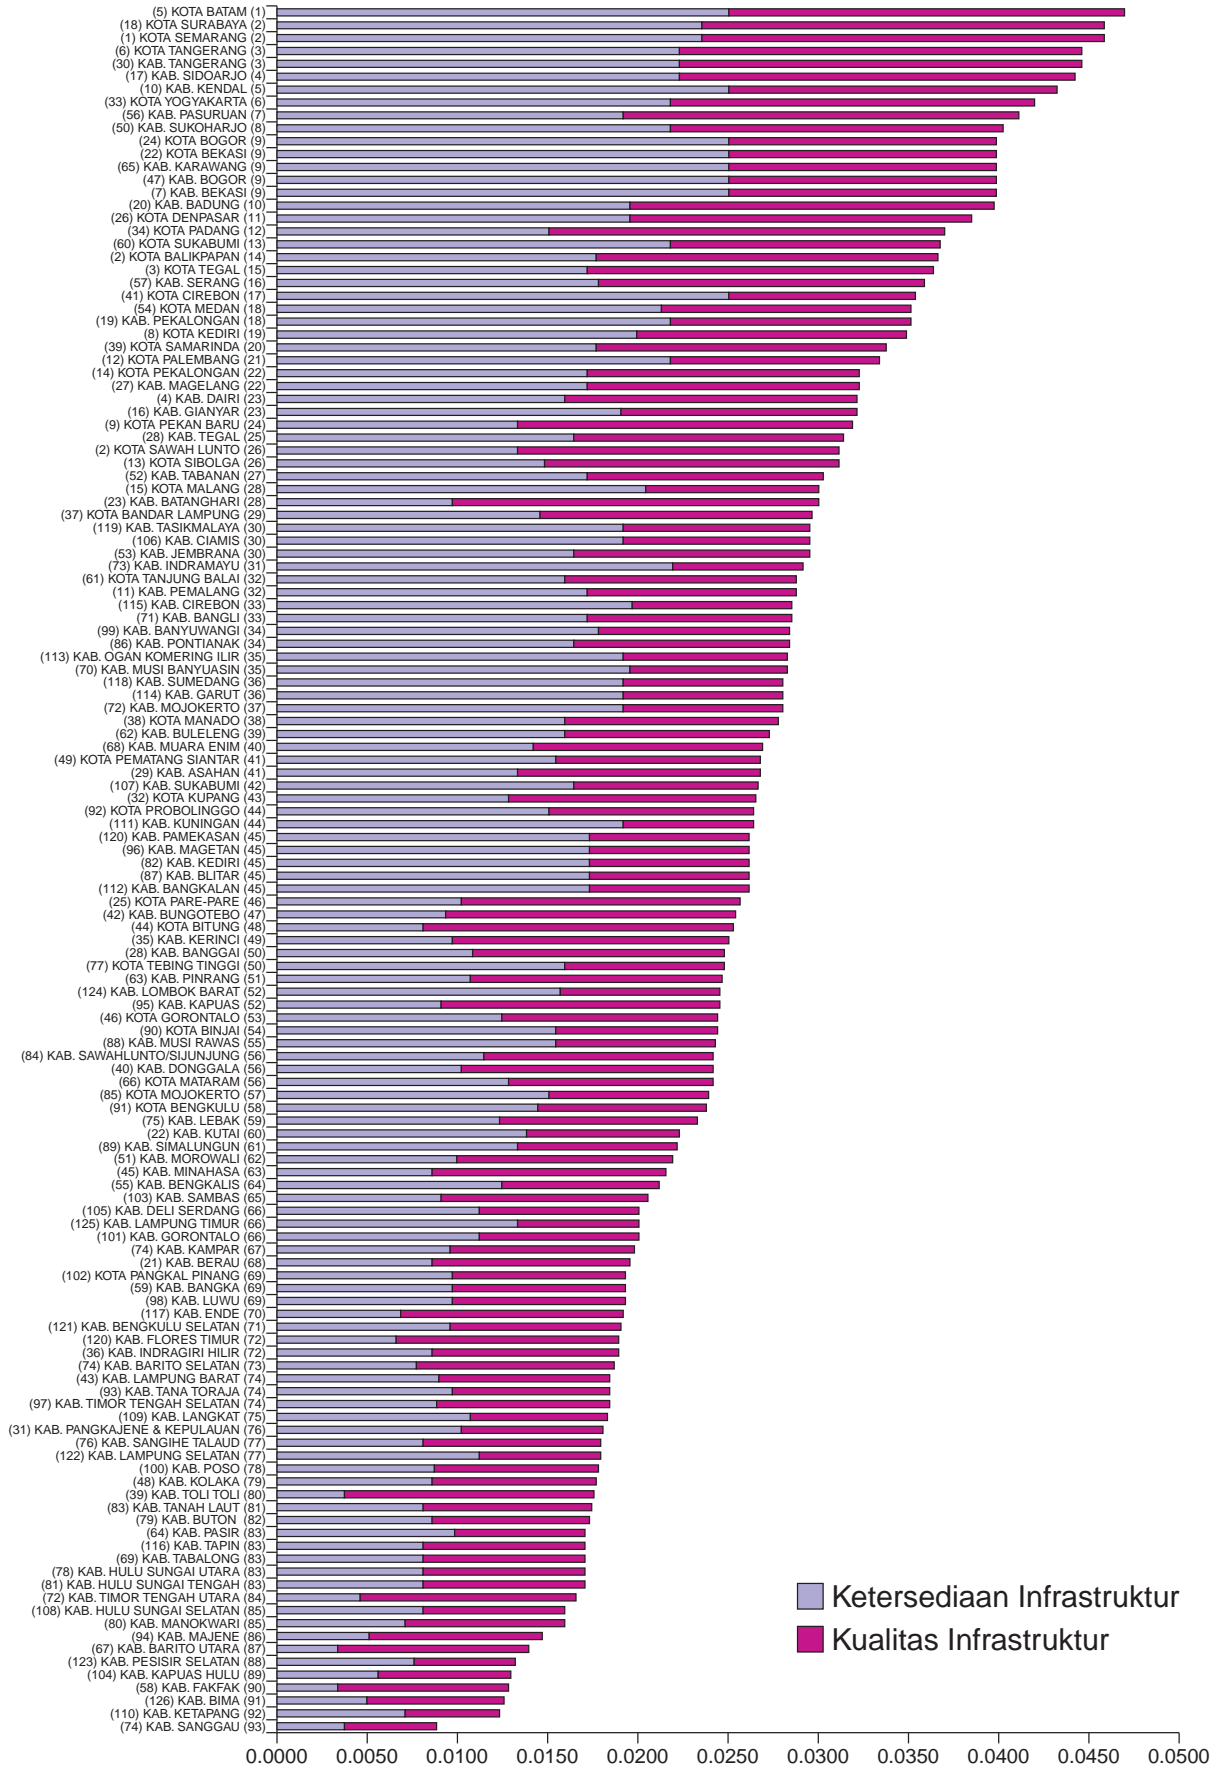



Lampiran 1.11.

Peringkat Daya Tarik Investasi Daerah Berbasis Perdagangan dan Jasa

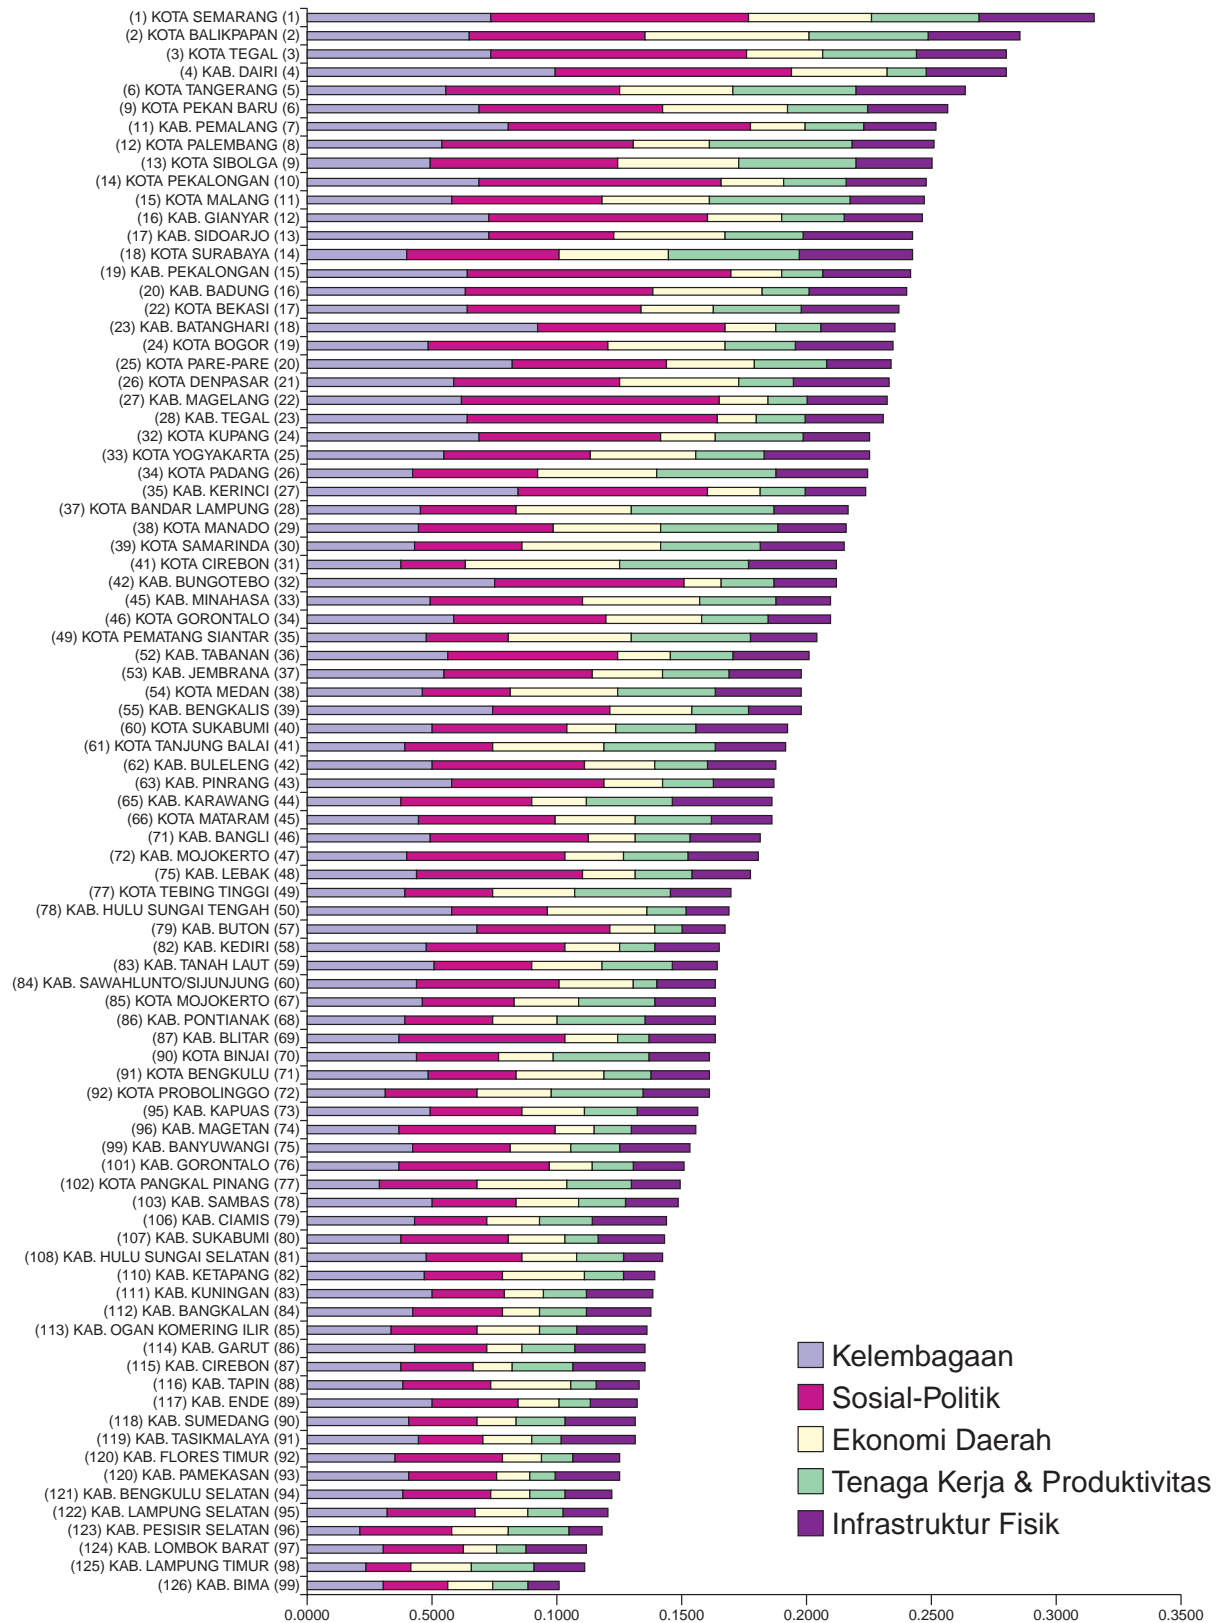

**Lampiran 1.12.**  
**Peringkat Daya Tarik Investasi Daerah Berbasis Manufaktur**

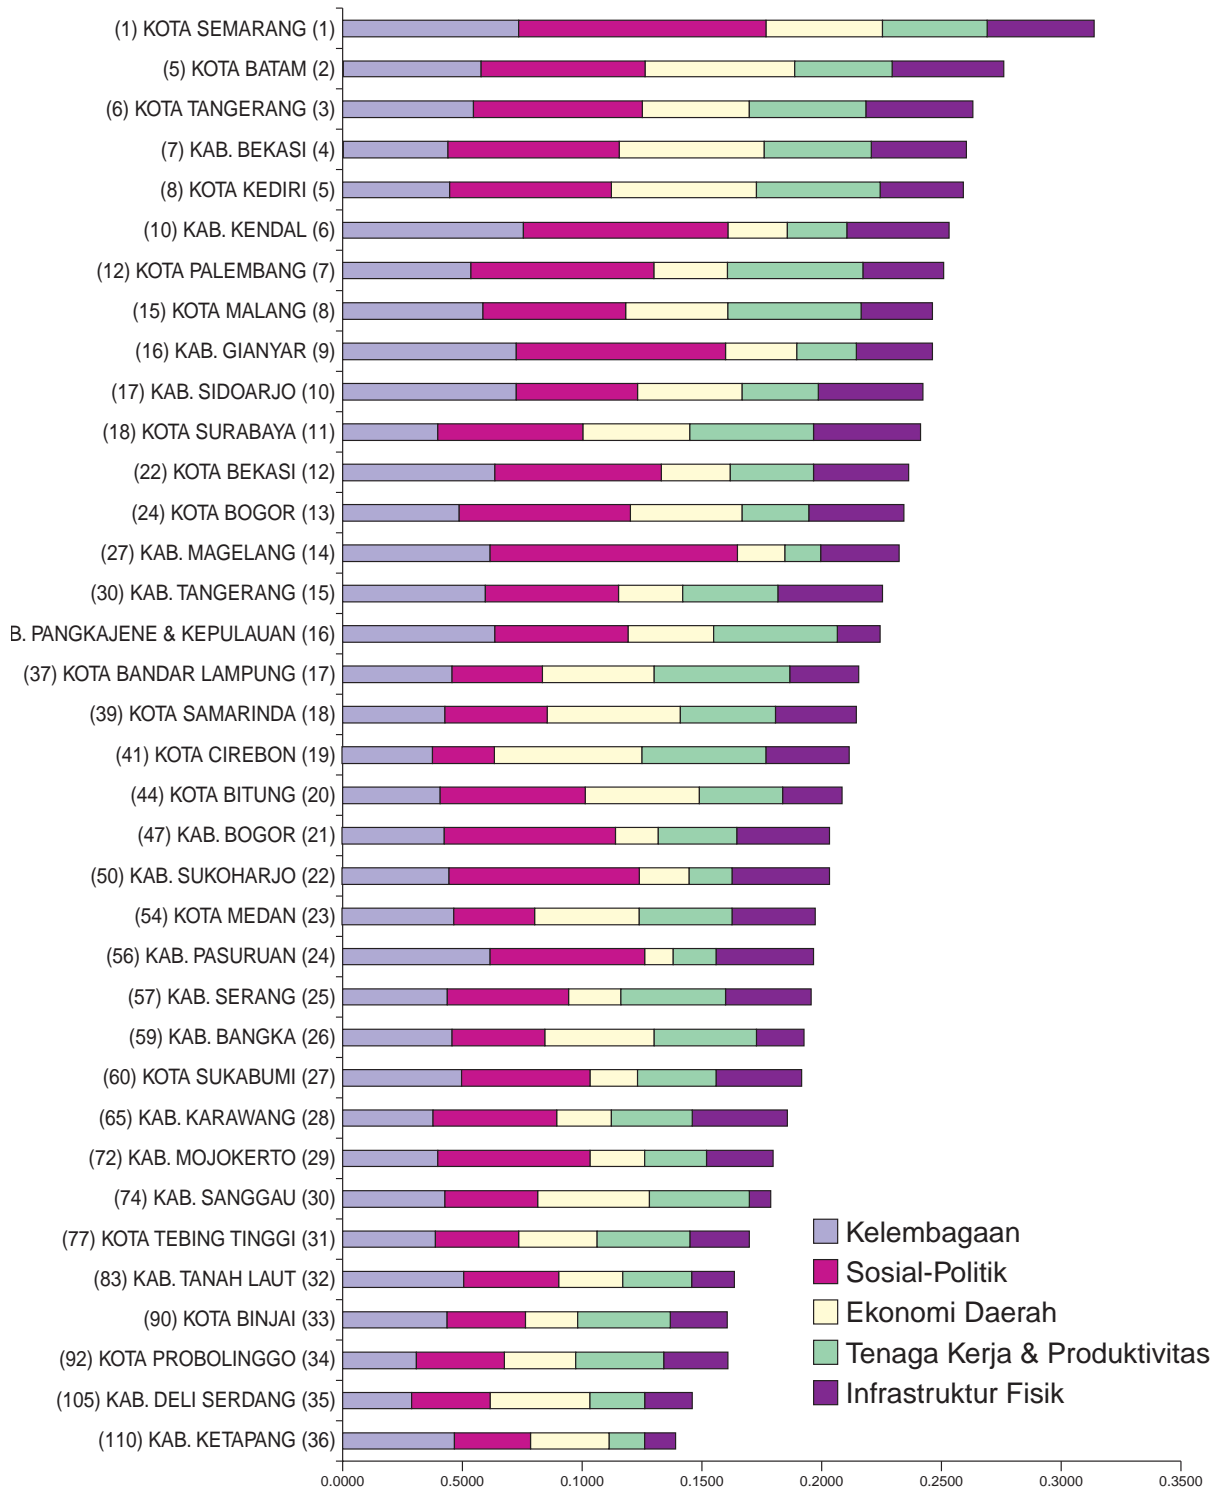

Lampiran 1.13.

Peringkat Daya Tarik Investasi Daerah Berbasis Pertambangan

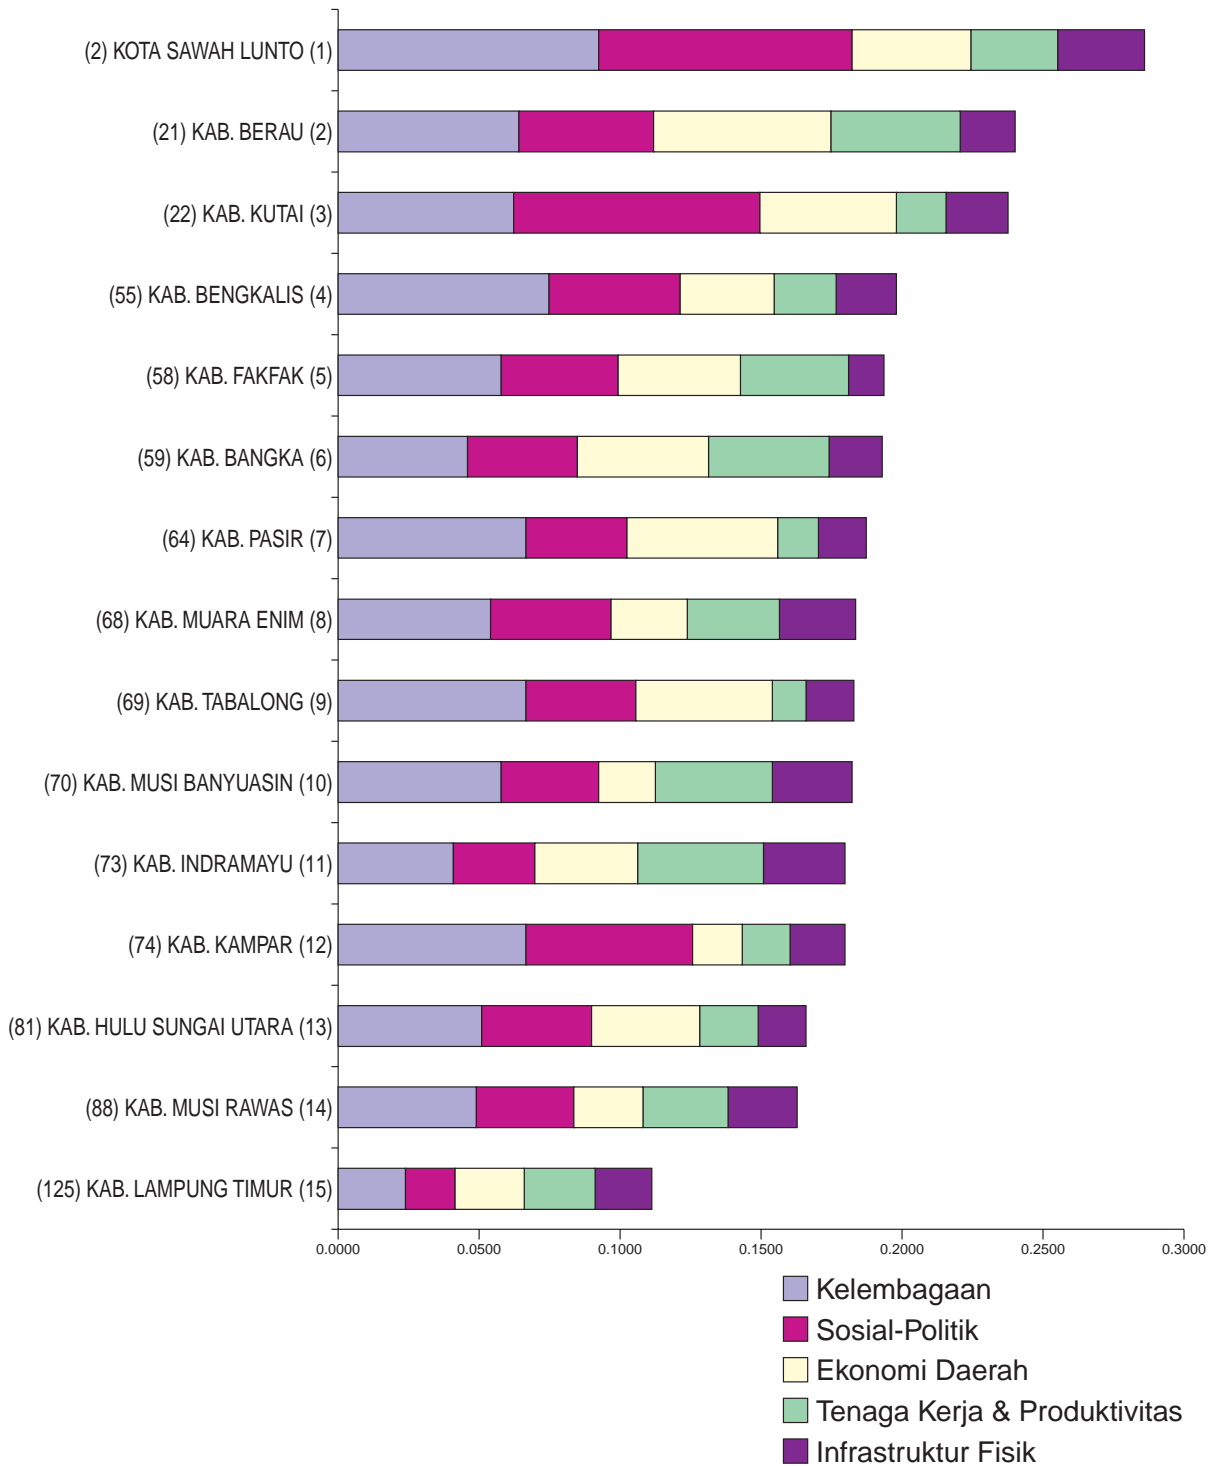

Lampiran 1.14.

Peringkat Daya Tarik Investasi Daerah Berbasis Perkebunan dan Kehutanan

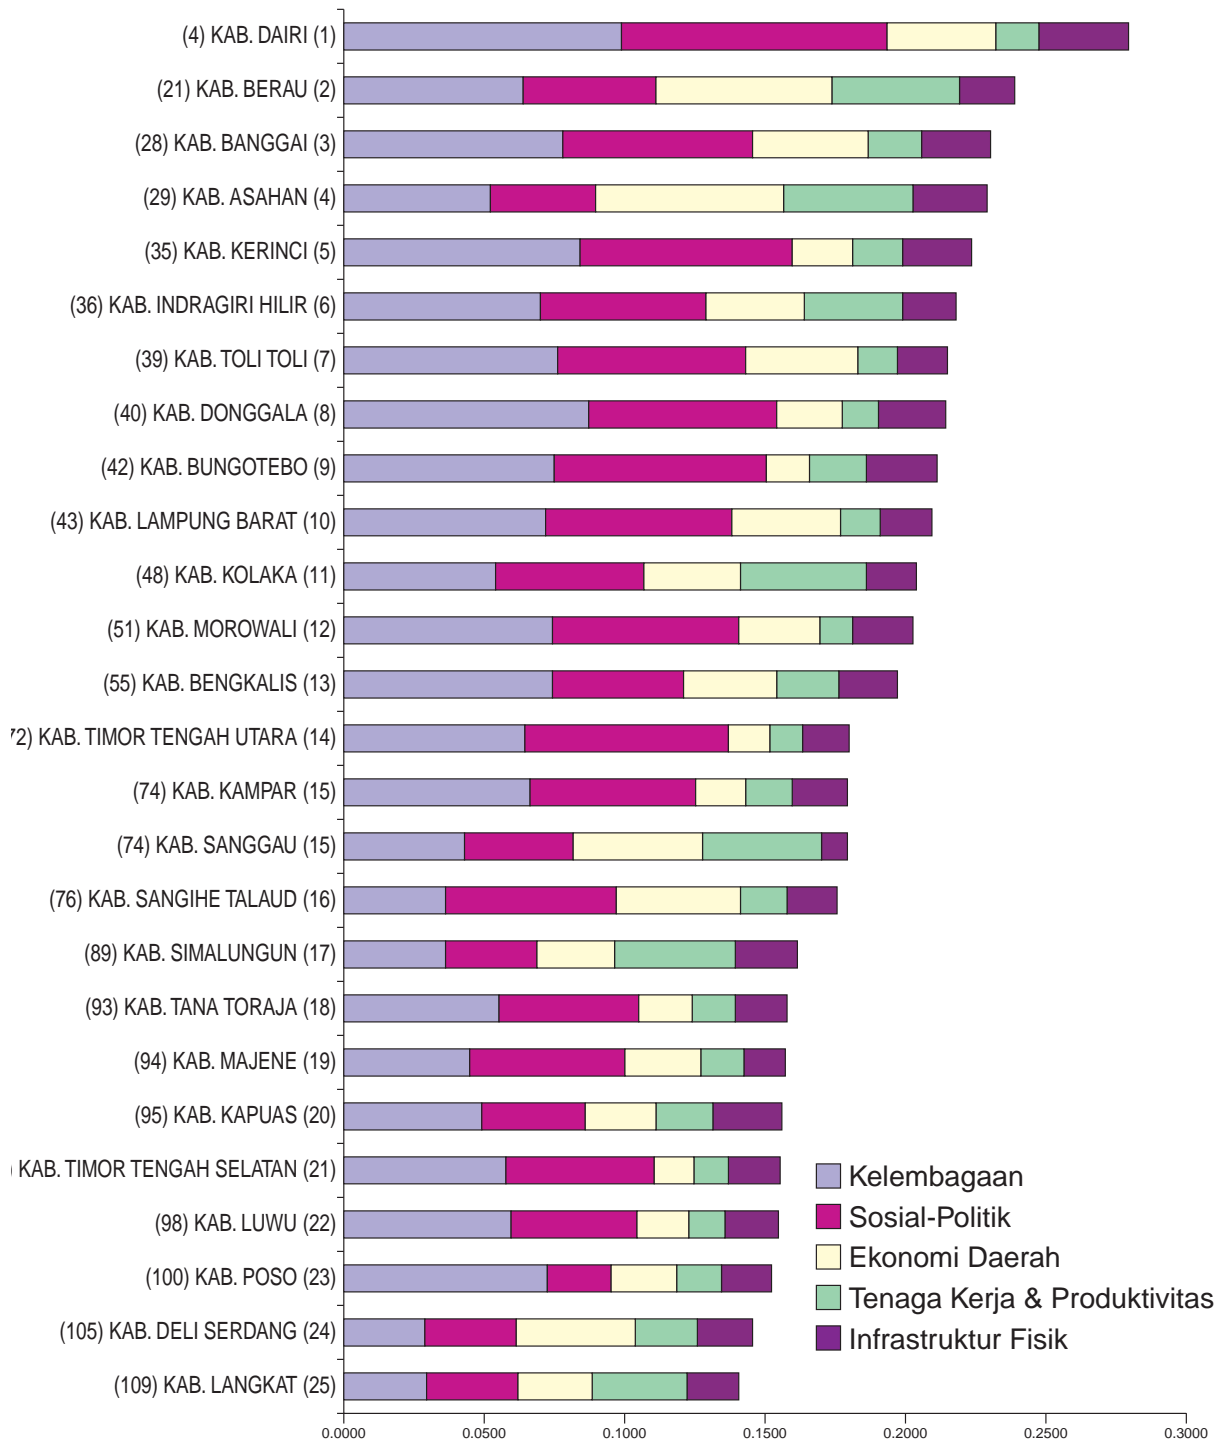



Lampiran 1.15.

Peringkat Daya Tarik Investasi Daerah Berbasis Pertanian Non Pangan

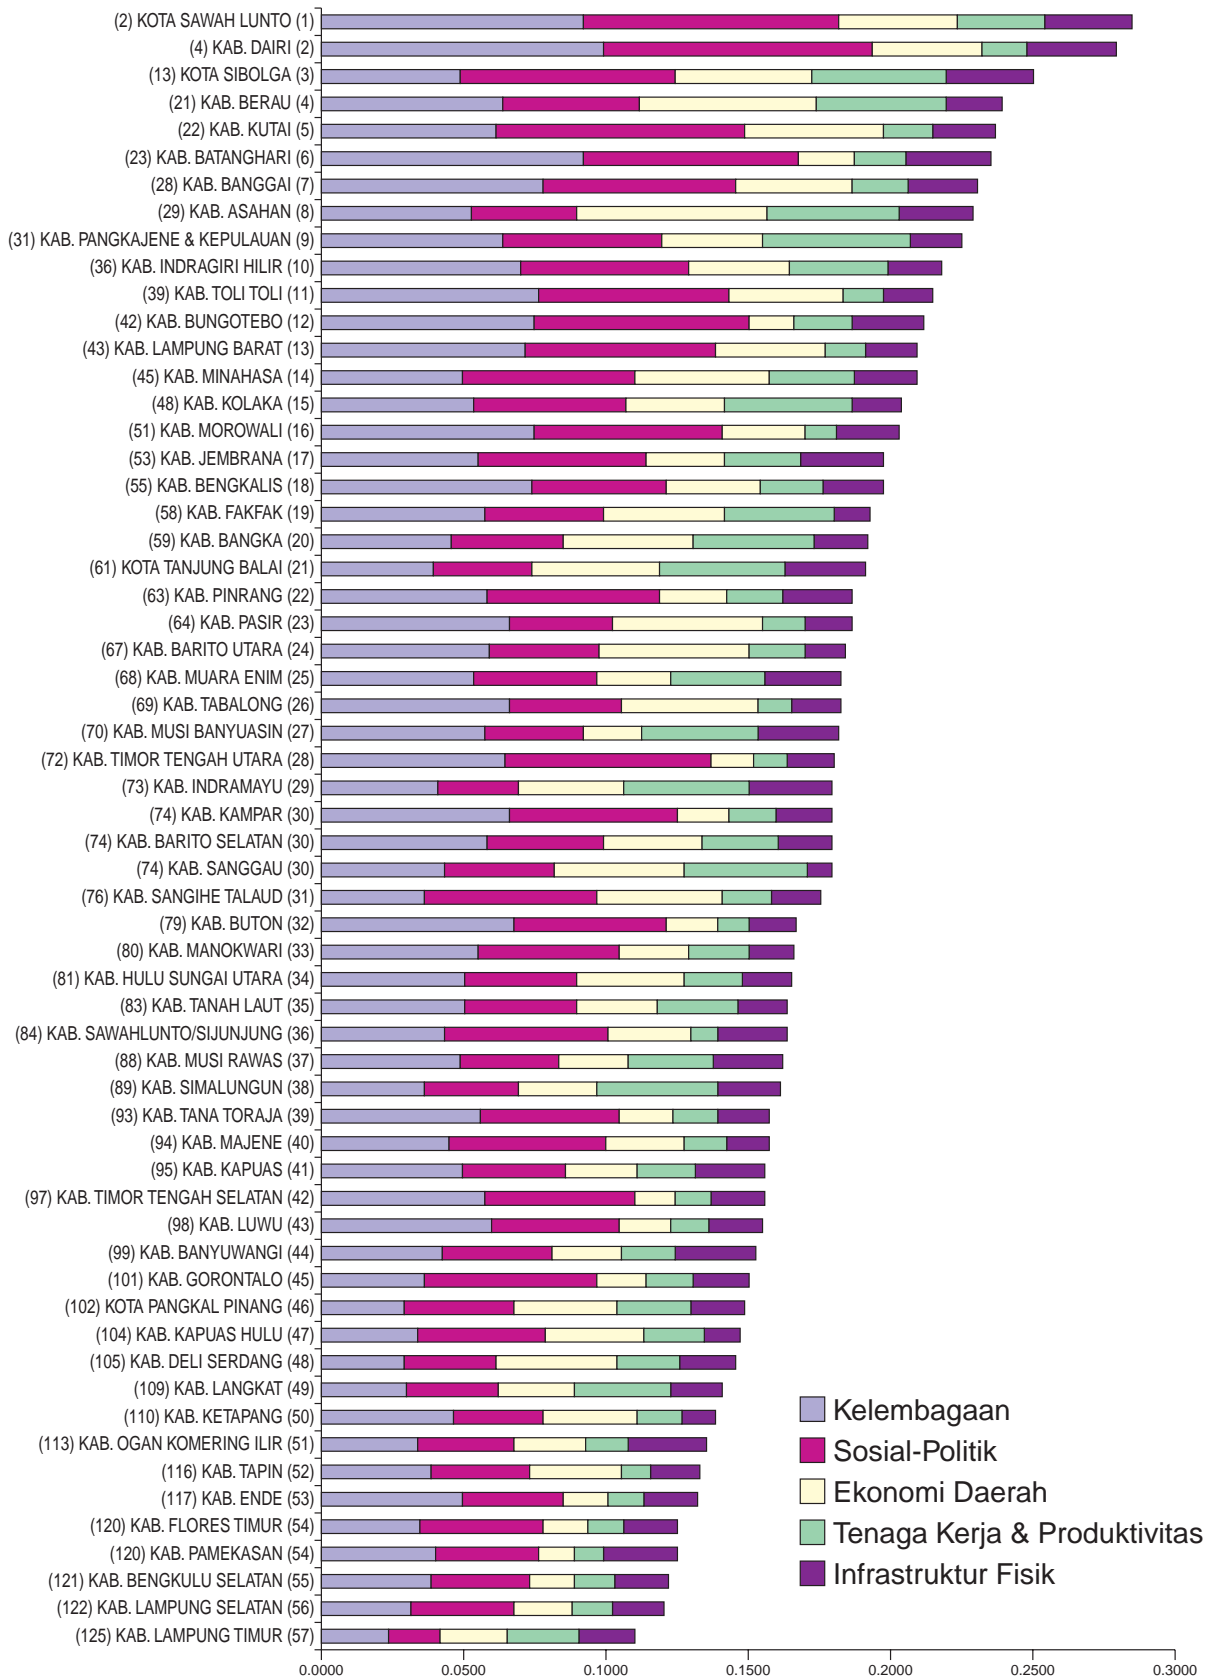

## Lampiran 2. Daerah Penelitian

### Lampiran 2.1.

#### Statistik 134 Daerah Pemeringkatan

##### 1. Berdasarkan Propinsi, Kabupaten, dan Kota

| NO                      | PROPINSI            | KABUPATEN |             | KOTA      |             | JUMLAH     |            |
|-------------------------|---------------------|-----------|-------------|-----------|-------------|------------|------------|
|                         |                     | Jumlah    | % Total     | Jumlah    | % Total     | Jumlah     | % Total    |
| 1                       | SUMATERA UTARA      | 5         | 3.7         | 6         | 4.5         | 11         | 8.2        |
| 2                       | SUMATERA BARAT      | 2         | 1.5         | 2         | 1.5         | 4          | 3.0        |
| 3                       | R I A U             | 3         | 2.2         | 2         | 1.5         | 5          | 3.7        |
| 4                       | J A M B I           | 3         | 2.2         | 0         | 0.0         | 3          | 2.2        |
| 5                       | SUMATERA SELATAN    | 4         | 3.0         | 1         | 0.7         | 5          | 3.7        |
| 6                       | BANGKA BELITUNG     | 1         | 0.7         | 1         | 0.7         | 2          | 1.5        |
| 7                       | BENGKULU            | 1         | 0.7         | 1         | 0.7         | 2          | 1.5        |
| 8                       | LAMPUNG             | 3         | 2.2         | 1         | 0.7         | 4          | 3.0        |
| 9                       | BANTEN              | 3         | 2.2         | 1         | 0.7         | 4          | 3.0        |
| 10                      | JAWA BARAT          | 11        | 8.2         | 4         | 3.0         | 15         | 11.2       |
| 11                      | JAWA TENGAH         | 6         | 4.5         | 3         | 2.2         | 9          | 6.7        |
| 12                      | D.I. YOGYAKARTA     | 0         | 0.0         | 1         | 0.7         | 1          | 0.7        |
| 13                      | JAWA TIMUR          | 9         | 6.7         | 5         | 3.7         | 14         | 10.4       |
| 14                      | BALI                | 6         | 4.5         | 1         | 0.7         | 7          | 5.2        |
| 15                      | KALIMANTAN BARAT    | 5         | 3.7         | 0         | 0.0         | 5          | 3.7        |
| 16                      | KALIMANTAN TENGAH   | 3         | 2.2         | 0         | 0.0         | 3          | 2.2        |
| 17                      | KALIMANTAN SELATAN  | 6         | 4.5         | 0         | 0.0         | 6          | 4.5        |
| 18                      | KALIMANTAN TIMUR    | 3         | 2.2         | 2         | 1.5         | 5          | 3.7        |
| 19                      | SULAWESI UTARA      | 2         | 1.5         | 2         | 1.5         | 4          | 3.0        |
| 20                      | GORONTALO           | 1         | 0.7         | 1         | 0.7         | 2          | 1.5        |
| 21                      | SULAWESI TENGAH     | 5         | 3.7         | 0         | 0.0         | 5          | 3.7        |
| 22                      | SULAWESI TENGGARA   | 2         | 1.5         | 0         | 0.0         | 2          | 1.5        |
| 23                      | SULAWESI SELATAN    | 5         | 3.7         | 1         | 0.7         | 6          | 4.5        |
| 24                      | NUSA TENGGARA BARAT | 2         | 1.5         | 1         | 0.7         | 3          | 2.2        |
| 25                      | NUSA TENGGARA TIMUR | 4         | 3.0         | 1         | 0.7         | 5          | 3.7        |
| 26                      | PAPUA               | 2         | 1.5         | 0         | 0.0         | 2          | 1.5        |
| <b>JUMLAH (Total) :</b> |                     | <b>97</b> | <b>72.4</b> | <b>37</b> | <b>27.6</b> | <b>134</b> | <b>100</b> |

##### PROPINSI YANG TIDAK TERWAKILI

|   |                      |
|---|----------------------|
| 1 | NAGRO ACEH DARUSALAM |
| 2 | D.K.I JAKARTA        |
| 3 | MALUKU               |
| 4 | MALUKU UTARA         |

##### 2. Berdasarkan Basis Sektor Ekonomi

| NO                          | PDRB PERKAPITA                                                           | KABUPATEN |             | KOTA      |             | JUMLAH     |              |
|-----------------------------|--------------------------------------------------------------------------|-----------|-------------|-----------|-------------|------------|--------------|
|                             |                                                                          | Jumlah    | %           | Jumlah    | %           | Jumlah     | %            |
| 1                           | PERDAGANGAN DAN JASA                                                     | 54        | 40.3        | 33        | 24.6        | 87         | 64.9         |
| 2                           | MANUFAKTUR                                                               | 19        | 14.2        | 17        | 12.7        | 36         | 26.9         |
| 3                           | PERTAMBANGAN                                                             | 14        | 10.4        | 1         | 0.7         | 15         | 11.2         |
| 4                           | PERKEBUNAN DAN KEHUTANAN                                                 | 26        | 19.4        | 0         | 0.0         | 26         | 19.4         |
| 5                           | PERTANIAN NON PANGAN<br>(Perkebunan, Kehutanan, Peternakan, & Perikanan) | 56        | 41.8        | 4         | 3.0         | 60         | 44.8         |
| <b>Jumlah Keseluruhan :</b> |                                                                          | <b>97</b> | <b>72.4</b> | <b>37</b> | <b>27.6</b> | <b>134</b> | <b>100.0</b> |

Nilai % = prosentase terhadap 134 daerah

##### 3. Berdasarkan PDRB Perkapita

| NO                          | PDRB PERKAPITA                     | KABUPATEN |              | KOTA      |              | JUMLAH     |              |
|-----------------------------|------------------------------------|-----------|--------------|-----------|--------------|------------|--------------|
|                             |                                    | Jumlah    | %            | Jumlah    | %            | Jumlah     | %            |
| 1                           | PDRB Perkapita < 2.5 Juta          | 32        | 23.9         | 0         | 0.0          | 32         | 23.9         |
| 2                           | 2.5 Juta ≤ PDRB Perkapita < 5 Juta | 49        | 36.6         | 12        | 9.0          | 61         | 45.5         |
| 3                           | 5 Juta ≤ PDRB Perkapita < 7.5 Juta | 10        | 7.5          | 13        | 9.7          | 23         | 17.2         |
| 4                           | PDRB Perkapita ≥ 7.5 Juta          | 6         | 4.5          | 12        | 9.0          | 18         | 13.4         |
| <b>Jumlah Keseluruhan :</b> |                                    | <b>97</b> | <b>72.39</b> | <b>37</b> | <b>27.61</b> | <b>134</b> | <b>100.0</b> |

Lampiran 2.2.  
Daftar 134 Daerah (Kabupaten/Kota) Pemeringkatan

| No. Urut | No. Prop | PROPINSI         | No. Kab /Kota | KABUPATEN / KOTA          |
|----------|----------|------------------|---------------|---------------------------|
| 1        | 1        | SUMATERA UTARA   | 1             | Kab. Asahan               |
| 2        |          |                  | 2             | Kab. Dairi                |
| 3        |          |                  | 3             | Kab. Deli Serdang         |
| 4        |          |                  | 4             | Kab. Langkat              |
| 5        |          |                  | 5             | Kab. Simalungun           |
| 6        |          |                  | 6             | Kota Binjai               |
| 7        |          |                  | 7             | Kota Medan                |
| 8        |          |                  | 8             | Kota Pematang Siantar     |
| 9        |          |                  | <b>9</b>      | <b>Kota Sibolga</b>       |
| 10       |          |                  | 10            | Kota Tanjung Balai        |
| 11       |          |                  | 11            | Kota Tebing Tinggi        |
| 12       | 2        | SUMATERA BARAT   | 1             | Kab. Pesisir Selatan      |
| 13       |          |                  | 2             | Kab. Sawahlunto/Sijunjung |
| 14       |          |                  | 3             | Kota Padang               |
| 15       |          |                  | <b>4</b>      | <b>Kota Sawahlunto</b>    |
| 16       | 3        | R I A U          | <b>1</b>      | <b>Kab. Bengkalis</b>     |
| 17       |          |                  | 2             | Kab. Indragiri Hilir      |
| 18       |          |                  | 3             | Kab. Kampar               |
| 19       |          |                  | 4             | Kota Batam                |
| 20       |          |                  | 5             | Kota Pekanbaru            |
| 21       | 4        | J A M B I        | 1             | Kab. Batanghari           |
| 22       |          |                  | 2             | Kab. Bungo                |
| 23       |          |                  | 3             | Kab. Kerinci              |
| 24       | 5        | SUMATERA SELATAN | <b>1</b>      | <b>Kab. Muara Enim</b>    |
| 25       |          |                  | 2             | Kab. Musi Banyuasin       |
| 26       |          |                  | 3             | Kab. Musi Rawas           |
| 27       |          |                  | 4             | Kab. Ogan Komering Ilir   |
| 28       |          |                  | 5             | Kota Palembang            |
| 29       | 6        | BANGKA BELITUNG  | 1             | Kab. Bangka               |
| 30       |          |                  | 2             | Kota Pangkal Pinang       |
| 31       | 7        | BENGKULU         | 1             | Kab. Bengkulu Selatan     |
| 32       |          |                  | 2             | Kota Bengkulu             |
| 33       | 8        | LAMPUNG          | <b>1</b>      | <b>Kab. Lampung Barat</b> |
| 34       |          |                  | 2             | Kab. Lampung Selatan      |
| 35       |          |                  | 3             | Kab. Lampung Timur        |
| 36       |          |                  | 4             | Kota Bandar Lampung       |
| 37       | 9        | BANTEN           | 1             | Kab. Lebak                |
| 38       |          |                  | <b>2</b>      | <b>Kab. Serang</b>        |
| 39       |          |                  | 3             | Kab. Tangerang            |
| 40       |          |                  | 4             | Kota Tangerang            |
| 41       | 10       | JAWA BARAT       | 1             | Kab. Bekasi               |
| 42       |          |                  | 2             | Kab. Bogor                |
| 43       |          |                  | 3             | Kab. Ciamis               |
| 44       |          |                  | 4             | Kab. Cirebon              |
| 45       |          |                  | 5             | Kab. Garut                |
| 46       |          |                  | 6             | Kab. Indramayu            |
| 47       |          |                  | 7             | Kab. Karawang             |
| 48       |          |                  | 8             | Kab. Kuningan             |
| 49       |          |                  | 9             | Kab. Sukabumi             |
| 50       |          |                  | 10            | Kab. Sumedang             |
| 51       |          |                  | 11            | Kab. Tasikmalaya          |
| 52       |          |                  | 12            | Kota Bekasi               |
| 53       |          |                  | 13            | Kota Bogor                |
| 54       |          |                  | 14            | Kota Cirebon              |
| 55       |          |                  | <b>15</b>     | <b>Kota Sukabumi</b>      |
| 56       | 11       | JAWA TENGAH      | <b>1</b>      | <b>Kab. Kendal</b>        |
| 57       |          |                  | 2             | Kab. Magelang             |
| 58       |          |                  | 3             | Kab. Pekalongan           |
| 59       |          |                  | 4             | Kab. Pemasang             |
| 60       |          |                  | 5             | Kab. Sukoharjo            |
| 61       |          |                  | 6             | Kab. Tegal                |
| 62       |          |                  | 7             | Kota Pekalongan           |
| 63       |          |                  | 8             | Kota Semarang             |
| 64       |          |                  | 9             | Kota Tegal                |
| 65       | 12       | D.I. YOGYAKARTA  | 1             | Kota Yogyakarta           |
| 66       | 13       | JAWA TIMUR       | 1             | Kab. Bangkalan            |
| 67       |          |                  | 2             | Kab. Banyuwangi           |

| No. Urut | No. Prop | PROPINSI            | No. Kab /Kota | KABUPATEN / KOTA                 |
|----------|----------|---------------------|---------------|----------------------------------|
| 68       |          |                     | 3             | Kab. Blitar                      |
| 69       |          |                     | 4             | Kab. Kediri                      |
| 70       |          |                     | 5             | Kab. Magetan                     |
| 71       |          |                     | 6             | Kab. Mojokerto                   |
| 72       |          |                     | 7             | Kab. Pamekasan                   |
| 73       |          |                     | 8             | Kab. Pasuruan                    |
| 74       |          |                     | <b>9</b>      | <b>Kab. Sidoarjo</b>             |
| 75       |          |                     | <b>10</b>     | <b>Kota Kediri</b>               |
| 76       |          |                     | 11            | Kota Malang                      |
| 77       |          |                     | 12            | Kota Mojokerto                   |
| 78       |          |                     | 13            | Kota Probolinggo                 |
| 79       |          |                     | 14            | Kota Surabaya                    |
| 80       | 14       | BALI                | 1             | Kab. Badung                      |
| 81       |          |                     | 2             | Kab. Bangli                      |
| 82       |          |                     | 3             | Kab. Buleleng                    |
| 83       |          |                     | 4             | Kab. Gianyar                     |
| 84       |          |                     | 5             | Kab. Jembrana                    |
| 85       |          |                     | 6             | Kab. Tabanan                     |
| 86       |          |                     | <b>7</b>      | <b>Kota Denpasar</b>             |
| 87       | 15       | KALIMANTAN BARAT    | <b>1</b>      | <b>Kab. Kapuas Hulu</b>          |
| 88       |          |                     | 2             | Kab. Ketapang                    |
| 89       |          |                     | 3             | Kab. Pontianak                   |
| 90       |          |                     | 4             | Kab. Sambas                      |
| 91       |          |                     | 5             | Kab. Sanggau                     |
| 92       | 16       | KALIMANTAN TENGAH   | 1             | Kab. Barito Selatan              |
| 93       |          |                     | <b>2</b>      | <b>Kab. Barito Utara</b>         |
| 94       |          |                     | 3             | Kab. Kapuas                      |
| 95       | 17       | KALIMANTAN SELATAN  | 1             | Kab. Hulu Sungai Selatan         |
| 96       |          |                     | 2             | Kab. Hulu Sungai Tengah          |
| 97       |          |                     | 3             | Kab. Hulu Sungai Utara           |
| 98       |          |                     | 4             | Kab. Tabalong                    |
| 99       |          |                     | 5             | Kab. Tanah laut                  |
| 100      |          |                     | 6             | Kab. Tapin                       |
| 101      | 18       | KALIMANTAN TIMUR    | 1             | Kab. Berau                       |
| 102      |          |                     | <b>2</b>      | <b>Kab. Kutai</b>                |
| 103      |          |                     | 3             | Kab. Pasir                       |
| 104      |          |                     | 4             | Kota Balikpapan                  |
| 105      |          |                     | 5             | Kota Samarinda                   |
| 106      | 19       | SULAWESI UTARA      | 1             | Kab. Minahasa                    |
| 107      |          |                     | 2             | Kab. Sangihe Talaud              |
| 108      |          |                     | 3             | Kota Bitung                      |
| 109      |          |                     | <b>4</b>      | <b>Kota Manado</b>               |
| 110      | 20       | GORONTALO           | 1             | Kab. Gorontalo                   |
| 111      |          |                     | 2             | Kota Gorontalo                   |
| 112      | 21       | SULAWESI TENGAH     | 1             | Kab. Banggai                     |
| 113      |          |                     | 2             | Kab. Buol Tolitoli               |
| 114      |          |                     | 3             | Kab. Donggala                    |
| 115      |          |                     | <b>4</b>      | <b>Kab. Morowali</b>             |
| 116      |          |                     | 5             | Kab. Poso                        |
| 117      | 22       | SULAWESI TENGGARA   | 1             | Kab. Buton                       |
| 118      |          |                     | 2             | Kab. Kolaka                      |
| 119      | 23       | SULAWESI SELATAN    | 1             | Kab. Luwu                        |
| 120      |          |                     | 2             | Kab. Majene                      |
| 121      |          |                     | 3             | Kab. Pangkajene dan Kep.         |
| 122      |          |                     | <b>4</b>      | <b>Kab. Pinrang</b>              |
| 123      |          |                     | 5             | Kab. Tana Toraja                 |
| 124      |          |                     | <b>6</b>      | <b>Kota Parepare</b>             |
| 125      | 24       | NUSA TENGGARA BARAT | 1             | Kab. Bima                        |
| 126      |          |                     | 2             | Kab. Lombok Barat                |
| 127      |          |                     | 3             | Kota Mataram                     |
| 128      | 25       | NUSA TENGGARA TIMUR | 1             | Kab. Ende                        |
| 129      |          |                     | 2             | Kab. Flores Timur                |
| 130      |          |                     | <b>3</b>      | <b>Kab. Timor Tengah Selatan</b> |
| 131      |          |                     | 4             | Kab. Timor Tengah Utara          |
| 132      |          |                     | 5             | Kota Kupang                      |
| 133      | 26       | PAPUA               | 1             | Kab. Fak Fak                     |
| 134      |          |                     | <b>2</b>      | <b>Kab. Manokwari</b>            |

**Keterangan :** Nama daerah yang dicetak *miring dan tebal* merupakan daerah penelitian lapangan.



Lampiran 2.3.

Statistik Daerah Penelitian Lapangan

1. Berdasarkan Propinsi, Kabupaten, dan Kota

| NO                      | PROPINSI            | KABUPATEN |             | KOTA     |             | JUMLAH    |             |
|-------------------------|---------------------|-----------|-------------|----------|-------------|-----------|-------------|
|                         |                     | Jumlah    | % Thd Total | Jumlah   | % Thd Total | Jumlah    | % Thd Total |
| 1                       | BALI                | 0         | 0.0         | 1        | 5.0         | 1         | 5.0         |
| 2                       | BANTEN              | 1         | 5.0         | 0        | 0.0         | 1         | 5.0         |
| 3                       | JAWA BARAT          | 0         | 0.0         | 1        | 5.0         | 1         | 5.0         |
| 4                       | JAWA TENGAH         | 1         | 5.0         | 0        | 0.0         | 1         | 5.0         |
| 5                       | JAWA TIMUR          | 1         | 5.0         | 1        | 5.0         | 2         | 10.0        |
| 6                       | KALIMANTAN BARAT    | 1         | 5.0         | 0        | 0.0         | 1         | 5.0         |
| 7                       | KALIMANTAN TENGAH   | 1         | 5.0         | 0        | 0.0         | 1         | 5.0         |
| 8                       | KALIMANTAN TIMUR    | 1         | 5.0         | 0        | 0.0         | 1         | 5.0         |
| 9                       | LAMPUNG             | 1         | 5.0         | 0        | 0.0         | 1         | 5.0         |
| 10                      | NUSA TENGGARA TIMUR | 1         | 5.0         | 0        | 0.0         | 1         | 5.0         |
| 11                      | PAPUA               | 1         | 5.0         | 0        | 0.0         | 1         | 5.0         |
| 12                      | R I A U             | 1         | 5.0         | 0        | 0.0         | 1         | 5.0         |
| 13                      | SULAWESI SELATAN    | 1         | 5.0         | 1        | 5.0         | 2         | 10.0        |
| 14                      | SULAWESI TENGAH     | 1         | 5.0         | 0        | 0.0         | 1         | 5.0         |
| 15                      | SULAWESI UTARA      | 0         | 0.0         | 1        | 5.0         | 1         | 5.0         |
| 16                      | SUMATERA BARAT      | 0         | 0.0         | 1        | 5.0         | 1         | 5.0         |
| 17                      | SUMATERA SELATAN    | 1         | 5.0         | 0        | 0.0         | 1         | 5.0         |
| 18                      | SUMATERA UTARA      | 0         | 0.0         | 1        | 5.0         | 1         | 5.0         |
| <b>JUMLAH (Total) :</b> |                     | <b>13</b> | <b>65.0</b> | <b>7</b> | <b>35.0</b> | <b>20</b> | <b>100</b>  |

2. Berdasarkan Basis Sektor Ekonomi

| NO                          | BASIS EKONOMI        | KABUPATEN |            | KOTA     |            | JUMLAH    |              |
|-----------------------------|----------------------|-----------|------------|----------|------------|-----------|--------------|
|                             |                      | Jumlah    | %          | Jumlah   | %          | Jumlah    | %            |
| 1                           | PERDAGANGAN DAN JASA | 0         | 0          | 4        | 20.0       | 4         | 20.0         |
| 2                           | MANUFAKTUR           | 3         | 15         | 1        | 5.0        | 4         | 20.0         |
| 3                           | PERTAMBANGAN         | 3         | 15         | 1        | 5.0        | 4         | 20.0         |
| 4                           | PERTANIAN NON PANGAN | 7         | 35         | 1        | 5.0        | 8         | 40.0         |
|                             | 4.1. PERKEBUNAN      | 2         | 10         | 0        | 0.0        | 2         | 10           |
|                             | 4.2. KEHUTANAN       | 3         | 15         | 0        | 0.0        | 3         | 15           |
|                             | 4.3. PERIKANAN       | 1         | 5          | 1        | 5.0        | 2         | 10           |
|                             | 4.4. PETERNAKAN      | 1         | 5          | 0        | 0.0        | 1         | 5            |
| <b>Jumlah Keseluruhan :</b> |                      | <b>13</b> | <b>9.7</b> | <b>7</b> | <b>5.2</b> | <b>20</b> | <b>100.0</b> |

3. Berdasarkan PDRB Perkapita

| NO                          | PDRB PERKAPITA                     | KABUPATEN |              | KOTA     |              | JUMLAH    |              |
|-----------------------------|------------------------------------|-----------|--------------|----------|--------------|-----------|--------------|
|                             |                                    | Jumlah    | %            | Jumlah   | %            | Jumlah    | %            |
| 1                           | PDRB Perkapita < 2.5 Juta          | 1         | 5.0          | 0        | 0.0          | 1         | 5.0          |
| 2                           | 2.5 Juta ≤ PDRB Perkapita < 5 Juta | 8         | 40.0         | 3        | 15.0         | 11        | 55.0         |
| 3                           | 5 Juta ≤ PDRB Perkapita < 7.5 Juta | 2         | 10.0         | 3        | 15.0         | 5         | 25.0         |
| 4                           | PDRB Perkapita ≥ 7.5 Juta          | 1         | 5.0          | 2        | 10.0         | 3         | 15.0         |
| <b>Jumlah Keseluruhan :</b> |                                    | <b>12</b> | <b>60.00</b> | <b>8</b> | <b>40.00</b> | <b>20</b> | <b>100.0</b> |

*Lampiran 2.4.*  
*Daftar Daerah Penelitian Lapangan*

| <b>NO</b> | <b>PROPINSI</b>     |    | <b>KABUPATEN / KOTA</b>        |
|-----------|---------------------|----|--------------------------------|
| 1         | SUMATERA UTARA      | 1  | <b><i>KOTA SIBOLGA</i></b>     |
| 2         | SUMATERA SELATAN    | 2  | KAB. MUARA ENIM                |
| 3         | SUMATERA BARAT      | 3  | <b><i>KOTA SAWAH LUNTO</i></b> |
| 4         | R I A U             | 4  | KAB. BENGKALIS                 |
| 5         | LAMPUNG             | 5  | KAB. LAMPUNG BARAT             |
| 6         | BANTEN              | 6  | KAB. SERANG                    |
| 7         | JAWA BARAT          | 7  | <b><i>KOTA SUKABUMI</i></b>    |
| 8         | JAWA TENGAH         | 8  | KAB. KENDAL                    |
| 9         | JAWA TIMUR          | 9  | KAB. SIDOARJO                  |
|           |                     | 10 | <b><i>KOTA KEDIRI</i></b>      |
| 10        | BALI                | 11 | <b><i>KOTA DENPASAR</i></b>    |
| 11        | KALIMANTAN BARAT    | 12 | KAB. KAPUAS HULU               |
| 12        | KALIMANTAN TENGAH   | 13 | KAB. BARITO UTARA              |
| 13        | KALIMANTAN TIMUR    | 14 | KAB. KUTAI                     |
| 14        | SULAWESI UTARA      | 15 | <b><i>KOTA MANADO</i></b>      |
| 15        | SULAWESI TENGAH     | 16 | KAB. MOROWALI                  |
| 16        | SULAWESI SELATAN    | 17 | KAB. PINRANG                   |
|           |                     | 18 | <b><i>KOTA PAREPARE</i></b>    |
| 17        | NUSA TENGGARA TIMUR | 19 | KAB. TIMOR TENGAH SELATAN      |
| 18        | PAPUA               | 20 | KAB. MANOKWARI                 |

# Lampiran 3. Data Penelitian

## Daftar Data, Jenis Data, dan Sumber Data Pemeringkatan

| NO.                                       | FAKTOR - VARIABEL - INDIKATOR                                                                | JENIS DATA     | SUMBER DATA                                                        |
|-------------------------------------------|----------------------------------------------------------------------------------------------|----------------|--------------------------------------------------------------------|
| <b>A. FAKTOR KELEMBAGAAN</b>              |                                                                                              |                |                                                                    |
| <b>1. Variabel Kepastian Hukum</b>        |                                                                                              |                |                                                                    |
| 1                                         | Konsistensi Peraturan                                                                        | Data Primer    | Persepsi Dunia Usaha dan <i>Panel Judgement</i>                    |
| 2                                         | Pengakuan Hukum                                                                              | Data Primer    | Persepsi Dunia Usaha dan <i>Panel Judgement</i>                    |
| 3                                         | Pungli di luar Birokrasi                                                                     | Data Primer    | Persepsi Dunia Usaha dan <i>Panel Judgement</i>                    |
| 4                                         | Hubungan Eksekutif - Legislatif                                                              | Data Primer    | Persepsi Dunia Usaha dan <i>Panel Judgement</i>                    |
| <b>2. Variabel Aparatur dan Pelayanan</b> |                                                                                              |                |                                                                    |
| 5                                         | Birokrasi Pelayanan                                                                          | Data Primer    | Persepsi Dunia Usaha dan <i>Panel Judgement</i>                    |
| 6                                         | Penyalahgunaan Wewenang                                                                      | Data Primer    | Persepsi Dunia Usaha dan <i>Panel Judgement</i>                    |
| <b>3. Variabel Keuangan Daerah</b>        |                                                                                              |                |                                                                    |
| 7                                         | Rasio Penerimaan Retribusi terhadap Pajak                                                    | Data Sekunder  | APBD Daerah Kabupaten / Kota Tahun 2001 - 2002                     |
| 8                                         | Rasio Anggaran Pembangunan terhadap APBD                                                     | Data Sekunder  | APBD Daerah Kabupaten / Kota Tahun 2001 - 2002                     |
| <b>4. Variabel Perda</b>                  |                                                                                              |                |                                                                    |
| 9                                         | Peraturan Produk Hukum Daerah (Pajak dan Retribusi)                                          | Analisis Perda | Perda, SK Kepala Daerah Kabupaten Kota                             |
| <b>B. FAKTOR KONDISI SOSPOL</b>           |                                                                                              |                |                                                                    |
| <b>1. Variabel Keamanan</b>               |                                                                                              |                |                                                                    |
| 10                                        | Gangguan Keamanan terhadap Dunia Usaha                                                       | Data Primer    | Persepsi Dunia Usaha dan <i>Panel Judgement</i>                    |
| 11                                        | Gangguan Keamanan terhadap Masyarakat                                                        | Data Primer    | Persepsi Dunia Usaha dan <i>Panel Judgement</i>                    |
| 12                                        | Kecepatan Aparat Menanggulangi Gangguan Keamanan                                             | Data Primer    | Persepsi Dunia Usaha dan <i>Panel Judgement</i>                    |
| <b>2. Variabel Sospol</b>                 |                                                                                              |                |                                                                    |
| 13                                        | Partisipasi Masyarakat                                                                       | Data Primer    | Persepsi Dunia Usaha dan <i>Panel Judgement</i>                    |
| 14                                        | Potensi Konflik di masyarakat                                                                | Data Primer    | Persepsi Dunia Usaha dan <i>Panel Judgement</i>                    |
| 15                                        | Stabilitas Politik                                                                           | Data Primer    | Persepsi Dunia Usaha dan <i>Panel Judgement</i>                    |
| 16                                        | Intensitas Unjuk Rasa                                                                        | Data Primer    | Persepsi Dunia Usaha dan <i>Panel Judgement</i>                    |
| <b>3. Variabel Budaya Masyarakat</b>      |                                                                                              |                |                                                                    |
| 17                                        | Keterbukaan Masyarakat terhadap Dunia Usaha                                                  | Data Primer    | Persepsi Dunia Usaha dan <i>Panel Judgement</i>                    |
| 18                                        | Non Diskriminasi (Perlakuan yang sama terhadap semua orang tanpa melihat perbedaan yang ada) | Data Primer    | Persepsi Dunia Usaha dan <i>Panel Judgement</i>                    |
| 19                                        | Adat Istiadat Masyarakat Daerah                                                              | Data Primer    | Persepsi Dunia Usaha dan <i>Panel Judgement</i>                    |
| 20                                        | Etos Kerja Masyarakat Daerah                                                                 | Data Primer    | Persepsi Dunia Usaha dan <i>Panel Judgement</i>                    |
| <b>C. FAKTOR EKONOMI DAERAH</b>           |                                                                                              |                |                                                                    |
| <b>1. Variabel Potensi Ekonomi</b>        |                                                                                              |                |                                                                    |
| 21                                        | PDRB Perkapita                                                                               | Data Sekunder  | PDRB Perkapita Kabupaten / Kota Th. 2000                           |
| 22                                        | Laju Pertumbuhan PDRB                                                                        | Data Sekunder  | PDRB Kabupaten / Kota atas Dasar Harga Konstan Tahun 1996 s/d 2000 |
| 23                                        | IPM (Indeks Pembangunan Manusia)                                                             | Data Sekunder  | IPM Kabupaten / Kota Tahun 1999                                    |
| <b>2. Variabel Struktur Ekonomi</b>       |                                                                                              |                |                                                                    |
| 24                                        | Nilai Tambah Sektor Primer                                                                   | Data Sekunder  | PDRB Kabupaten / Kota Atas Dasar Harga Berlaku Tahun 2000          |
| 25                                        | Nilai Tambah Sektor Sekunder                                                                 | Data Sekunder  | PDRB Kabupaten / Kota Atas Dasar Harga Berlaku Tahun 2000          |
| 26                                        | Nilai Tambah Sektor Tersier                                                                  | Data Sekunder  | PDRB Kabupaten / Kota Atas Dasar Harga Berlaku Tahun 2000          |

| NO.                                                        | FAKTOR - VARIABEL - INDIKATOR                                                                | JENIS DATA             | SUMBER DATA                                                                                                             |
|------------------------------------------------------------|----------------------------------------------------------------------------------------------|------------------------|-------------------------------------------------------------------------------------------------------------------------|
| <b>D. FAKTOR KETENAGAKERJAAN</b>                           |                                                                                              |                        |                                                                                                                         |
| <b>1. Variabel Ketersediaan Tenaga Kerja</b>               |                                                                                              |                        |                                                                                                                         |
| 27                                                         | Rasio Jumlah Penduduk Usia Produktif terhadap Jumlah Penduduk                                | Data Sekunder          | BPS Pusat : Susenas Kor Tahun 2000                                                                                      |
| 28                                                         | Rasio Jumlah Tenaga Kerja Berpengalaman dengan pendidikan SLTP terhadap Jumlah Tenaga Kerja  | Data Sekunder          | BPS Pusat : Susenas Kor Tahun 2000                                                                                      |
| 29                                                         | Rasio Penduduk Pencari Kerja Terhadap Jumlah Angkatan Kerja                                  | Data Sekunder          | BPS Pusat : Susenas Kor Tahun 2000                                                                                      |
| <b>2. Variabel Biaya Tenaga Kerja</b>                      |                                                                                              |                        |                                                                                                                         |
| 30                                                         | Rasio UMP/UMK terhadap IHK                                                                   | Data Sekunder          | Depnakertrans : Daftar UMP dan UMK Daerah Di Indonesia Tahun 2001, BPS Pusat : IHK 42 Kota Di Indonesia Th. 2001        |
| 31                                                         | Rasio Upah Yang Diterima Pekerja terhadap IHK                                                | Data Sekunder          | BPS Pusat : Susenasker Kor 2000, IHK 42 Kota di Indonesia                                                               |
| <b>3. Variabel Produktivitas dan Kualitas Tenaga Kerja</b> |                                                                                              |                        |                                                                                                                         |
| 32                                                         | Produktivitas (Rasio Nilai Tambah Sektor Manufaktur terhadap Jumlah Tenaga Kerja Manufaktur) | Data Sekunder          | BPS Pusat dan Daerah : PDRB Atas Harga Konstan Th. 2000, Susenasker Kor Th. 2000                                        |
| <b>E. FAKTOR INFRASTRUKTUR</b>                             |                                                                                              |                        |                                                                                                                         |
| <b>1. Variabel Ketersediaan Infrastruktur</b>              |                                                                                              |                        |                                                                                                                         |
| 33                                                         | Ketersediaan Jalan                                                                           | Data Primer & Sekunder | Persepsi Pelaku Usaha & <i>Panel Judgement</i> BPS Daerah / BPS Pusat : Daerah Kabupaten/ Kota dan Propinsi Dalam Angka |
| 34                                                         | Ketersediaan Pelabuhan Laut                                                                  | Data Primer & Sekunder | Persepsi Pelaku Usaha & <i>Panel Judgement</i> BPS Daerah / BPS Pusat : Daerah Kabupaten/ Kota dan Propinsi Dalam Angka |
| 35                                                         | Ketersediaan Pelabuhan Udara                                                                 | Data Primer & Sekunder | Persepsi Pelaku Usaha & <i>Panel Judgement</i> BPS Daerah / BPS Pusat : Daerah Kabupaten/ Kota dan Propinsi Dalam Angka |
| 36                                                         | Ketersediaan Saluran (sambungan) Telpon                                                      | Data Primer & Sekunder | Persepsi Pelaku Usaha & <i>Panel Judgement</i> BPS Daerah / BPS Pusat : Daerah Kabupaten/ Kota dan Propinsi Dalam Angka |
| 37                                                         | Ketersediaan Saluran (sambungan) Listrik                                                     | Data Primer & Sekunder | Persepsi Pelaku Usaha & <i>Panel Judgement</i> BPS Daerah / BPS Pusat : Daerah Kabupaten/ Kota dan Propinsi Dalam Angka |
| <b>2. Variabel Kualitas Infrastruktur</b>                  |                                                                                              |                        |                                                                                                                         |
| 38                                                         | Kualitas Jalan                                                                               | Data Primer & Sekunder | Persepsi Pelaku Usaha & <i>Panel Judgement</i> BPS Daerah / BPS Pusat : Daerah Kabupaten/ Kota dan Propinsi Dalam Angka |
| 39                                                         | Akses & Tipe Pelabuhan Laut                                                                  | Data Primer & Sekunder | Persepsi Pelaku Usaha & <i>Panel Judgement</i> BPS Daerah / BPS Pusat : Daerah Kabupaten/ Kota dan Propinsi Dalam Angka |
| 40                                                         | Akses & Tipe Pelabuhan Udara                                                                 | Data Primer & Sekunder | Persepsi Pelaku Usaha & <i>Panel Judgement</i> BPS Daerah / BPS Pusat : Daerah Kabupaten/ Kota dan Propinsi Dalam Angka |
| 41                                                         | Kualitas Sambungan Telpon                                                                    | Data Primer & Sekunder | Persepsi Pelaku Usaha & <i>Panel Judgement</i> BPS Daerah / BPS Pusat : Daerah Kabupaten/ Kota dan Propinsi Dalam Angka |
| 42                                                         | Kualitas Suplai Listrik                                                                      | Data Primer & Sekunder | Persepsi Pelaku Usaha & <i>Panel Judgement</i> BPS Daerah / BPS Pusat : Daerah Kabupaten/ Kota dan Propinsi Dalam Angka |



# Appendix 3 Research Data

## List of Data, Type of Data, and Source of Data Used in Rating

| NO.                                             | FACTOR - VARIABLE - INDICATOR                                                               | TYPE OF DATA                          | SOURCE OF DATA                                                     |
|-------------------------------------------------|---------------------------------------------------------------------------------------------|---------------------------------------|--------------------------------------------------------------------|
| <b>A. INSTITUTIONAL FACTOR</b>                  |                                                                                             |                                       |                                                                    |
| <b>1. Variable of Law Certainty</b>             |                                                                                             |                                       |                                                                    |
| 1                                               | Consistency of Regulations                                                                  | Primary Data                          | Perception of Business Community and <i>Panel Judgement</i>        |
| 2                                               | Law Enforcement                                                                             | Primary Data                          | Perception of Business Community and <i>Panel Judgement</i>        |
| 3                                               | Illegal Levy Outside Bureaucracy                                                            | Primary Data                          | Perception of Business Community and <i>Panel Judgement</i>        |
| 4                                               | Executive - Legislative Relations                                                           | Primary Data                          | Perception of Business Community and <i>Panel Judgement</i>        |
| <b>2. Variable of Apparatus and Service</b>     |                                                                                             |                                       |                                                                    |
| 5                                               | Service Procedure                                                                           | Primary Data                          | Perception of Business Community and <i>Panel Judgement</i>        |
| 6                                               | Abuse of Authority                                                                          | Primary Data                          | Perception of Business Community and <i>Panel Judgement</i>        |
| <b>3. Variable of Regional Finance</b>          |                                                                                             |                                       |                                                                    |
| 7                                               | Ratio of Retribution to Tax                                                                 | Secondary Data                        | Regency/City Regional Budget Year 2001-2002                        |
| 8                                               | Ratio of Development Budget to APBD                                                         | Secondary Data                        | Regency/City Regional Budget Year 2001-2002                        |
| <b>4. Variable of Regional Regulation</b>       |                                                                                             |                                       |                                                                    |
| 9                                               | Legal Product of the Region<br>(Tax and Retribution)                                        | Analysis of<br>Regional<br>Regulation | Regency/City Regional Regulations,<br>Decisions of the Regents     |
| <b>B. SOCIO-POLITICAL FACTOR</b>                |                                                                                             |                                       |                                                                    |
| <b>1. Variable of Security</b>                  |                                                                                             |                                       |                                                                    |
| 10                                              | Business Security                                                                           | Primary Data                          | Perception of Business Community and <i>Panel Judgement</i>        |
| 11                                              | Community Security                                                                          | Primary Data                          | Perception of Business Community and <i>Panel Judgement</i>        |
| 12                                              | Quick Response of Security Officers in<br>Handling Security Issues                          | Primary Data                          | Perception of Business Community and <i>Panel<br/>Judgement</i>    |
| <b>2. Variable of Socio-Political Condition</b> |                                                                                             |                                       |                                                                    |
| 13                                              | Public Participation                                                                        | Primary Data                          | Perception of Business Community and <i>Panel Judgement</i>        |
| 14                                              | Social Conflict                                                                             | Primary Data                          | Perception of Business Community and <i>Panel Judgement</i>        |
| 15                                              | Political Stability                                                                         | Primary Data                          | Perception of Business Community and <i>Panel Judgement</i>        |
| 16                                              | Intensity of Demonstration                                                                  | Primary Data                          | Perception of Business Community and <i>Panel Judgement</i>        |
| <b>3. Variable of Socio-Cultural Condition</b>  |                                                                                             |                                       |                                                                    |
| 17                                              | Community Openness toward<br>Business Community                                             | Primary Data                          | Perception of Business Community and <i>Panel Judgement</i>        |
| 18                                              | Absence of Non-Discriminatory Culture                                                       | Primary Data                          | Perception of Business Community and <i>Panel Judgement</i>        |
| 19                                              | Society's Customs                                                                           | Primary Data                          | Perception of Business Community and <i>Panel Judgement</i>        |
| 20                                              | Community's Working Ethos                                                                   | Primary Data                          | Perception of Business Community and <i>Panel Judgement</i>        |
| <b>C. REGIONAL ECONOMY FACTOR</b>               |                                                                                             |                                       |                                                                    |
| <b>1. Variable of Economic Potential</b>        |                                                                                             |                                       |                                                                    |
| 21                                              | PDRB per Capita                                                                             | Secondary Data                        | Regencies/Cities' PDRB per capita Year 2000                        |
| 22                                              | PDRB Growth Rate                                                                            | Secondary Data                        | Regencies/Cities' PDRB based on Constant Price Year<br>1996 - 2000 |
| 23                                              | Human Development Index (IPM)                                                               | Secondary Data                        | Regencies/Cities' IPM Year 1999                                    |
| <b>2. Variable of Economic Structure</b>        |                                                                                             |                                       |                                                                    |
| 24                                              | Value Added per Sector                                                                      | Secondary Data                        | Regencies/Cities PDRB based on Current Price Year 2000             |
| 25                                              | Value Added of Secondary Sectors                                                            | Secondary Data                        | Regencies/Cities PDRB based on Current Price Year 2000             |
| 26                                              | Value Added of Tertiary Sectors                                                             | Secondary Data                        | Regencies/Cities PDRB based on Current Price Year 2000             |
| <b>D. LABOR &amp; PRODUCTIVITY FACTOR</b>       |                                                                                             |                                       |                                                                    |
| <b>1. Variable of Manpower Availability</b>     |                                                                                             |                                       |                                                                    |
| 27                                              | Ratio of Productive-Age Population over<br>Total Population                                 | Secondary Data                        | Central Bureau of Statistics: National Census Year 2000            |
| 28                                              | Ration of Workers with Junior High<br>School Educational Background to<br>Total Labor Force | Secondary Data                        | Central Bureau of Statistics: National Census Year 2000            |
| 29                                              | Ration of Job Seeker over Labor Force                                                       | Secondary Data                        | Central Bureau of Statistics: National Census Year 2000            |

| NO.                                                        | FACTOR - VARIABLE - INDICATOR                                                                          | TYPE OF DATA               | SOURCE OF DATA                                                                                                                                                              |
|------------------------------------------------------------|--------------------------------------------------------------------------------------------------------|----------------------------|-----------------------------------------------------------------------------------------------------------------------------------------------------------------------------|
| <b>2. Variable of Labor Cost</b>                           |                                                                                                        |                            |                                                                                                                                                                             |
| 30                                                         | Ratio of Provincial/City Minimum Wage over Consumer Price Index (IHK)                                  | Secondary Data             | Ministry of Manpower and Transmigration: List of Provincial/City Minimum Wage in Indonesia Year 2001; Central Bureau of Statistics: IHK of 42 Cities in Indonesia Year 2001 |
| 31                                                         | Rate of Actual Salary over Consumer Price Index (IHK)                                                  | Secondary Data             | Central Bureau of Statistics: National Census Year 2000, IHK of 42 Cities in Indonesia                                                                                      |
| <b>3. Variable of Labor Productivity and Quality</b>       |                                                                                                        |                            |                                                                                                                                                                             |
| 32                                                         | Productivity (Ratio of Value Added of Manufacturing Sector over Total Workers in Manufacturing Sector) | Secondary Data             | Central and Regional Bureau of Statistics: PDRB based on Constant Price Year 2000; National Manpower Census Year 2000                                                       |
| <b>E. INFRASTRUCTURE FACTOR</b>                            |                                                                                                        |                            |                                                                                                                                                                             |
| <b>1. Variable of Physical Infrastructure Availability</b> |                                                                                                        |                            |                                                                                                                                                                             |
| 33                                                         | Availability of Streets                                                                                | Primary and Secondary Data | Perception of Business Community & <i>Panel Judgement</i> ; Central/Regional Bureau of Statistics: Regencies/Cities and Provinces in Figures                                |
| 34                                                         | Availability of Sea Port                                                                               | Primary and Secondary Data | Perception of Business Community & <i>Panel Judgement</i> ; Central/Regional Bureau of Statistics: Regencies/Cities and Provinces in Figures                                |
| 35                                                         | Availability of Airport                                                                                | Primary and Secondary Data | Perception of Business Community & <i>Panel Judgement</i> ; Central/Regional Bureau of Statistics: Regencies/Cities and Provinces in Figures                                |
| 36                                                         | Availability of Telephone Service                                                                      | Primary and Secondary Data | Perception of Business Community & <i>Panel Judgement</i> ; Central/Regional Bureau of Statistics: Regencies/Cities and Provinces in Figures                                |
| 37                                                         | Availability of Electricity Service                                                                    | Primary and Secondary Data | Perception of Business Community & <i>Panel Judgement</i> ; Central/Regional Bureau of Statistics: Regencies/Cities and Provinces in Figures                                |
| <b>2. Variable of Infrastructure Quality</b>               |                                                                                                        |                            |                                                                                                                                                                             |
| 38                                                         | Quality of Streets                                                                                     | Primary and Secondary Data | Perception of Business Community & <i>Panel Judgement</i> ; Central/Regional Bureau of Statistics: Regencies/Cities and Provinces in Figures                                |
| 39                                                         | Sea Port Accessibility and Type                                                                        | Primary and Secondary Data | Perception of Business Community & <i>Panel Judgement</i> ; Central/Regional Bureau of Statistics: Regencies/Cities and Provinces in Figures                                |
| 40                                                         | Airport Accessibility and Type                                                                         | Primary and Secondary Data | Perception of Business Community & <i>Panel Judgement</i> ; Central/Regional Bureau of Statistics: Regencies/Cities and Provinces in Figures                                |
| 41                                                         | Quality of Telephone Service                                                                           | Primary and Secondary Data | Perception of Business Community & <i>Panel Judgement</i> ; Central/Regional Bureau of Statistics: Regencies/Cities and Provinces in Figures                                |
| 42                                                         | Quality of Electricity Service                                                                         | Primary and Secondary Data | Perception of Business Community & <i>Panel Judgement</i> ; Central/Regional Bureau of Statistics: Regencies/Cities and Provinces in Figures                                |

## Lampiran 4.

# Faktor, Variabel, dan Indikator, Intensitas Pemeringkatan

### Daftar Faktor - Variabel - Indikator

| NO.                                       | FAKTOR -<br>VARIABEL - INDIKATOR                                                 | KETERANGAN                                                                                                                                                                                                                                                                                                                                                                                                                                                                                                                   | UKURAN DAN DATA<br>YANG DIGUNAKAN                                    |
|-------------------------------------------|----------------------------------------------------------------------------------|------------------------------------------------------------------------------------------------------------------------------------------------------------------------------------------------------------------------------------------------------------------------------------------------------------------------------------------------------------------------------------------------------------------------------------------------------------------------------------------------------------------------------|----------------------------------------------------------------------|
| <b>A. FAKTOR KELEMBAGAAN</b>              |                                                                                  |                                                                                                                                                                                                                                                                                                                                                                                                                                                                                                                              |                                                                      |
| <b>1. Variabel Kepastian Hukum</b>        |                                                                                  |                                                                                                                                                                                                                                                                                                                                                                                                                                                                                                                              |                                                                      |
| 1                                         | Konsistensi Peraturan yang Mengatur Kegiatan Usaha                               | Mengukur kepastian, kejelasan, dan konsistensi pemberlakuan peraturan daerah dan kebijakan lainnya yang mengatur kehidupan berusaha.                                                                                                                                                                                                                                                                                                                                                                                         | Persepsi Dunia Usaha dan <i>Panel Judgement</i>                      |
| 2                                         | Penegakan Hukum                                                                  | Mengukur kepastian hukum seperti perlindungan atas pelaksanaan kontrak kerja dan hak kepemilikan, konsistensi keputusan peradilan, terutama yang berkaitan dengan dunia usaha.                                                                                                                                                                                                                                                                                                                                               | Persepsi Dunia Usaha dan <i>Panel Judgement</i>                      |
| 3                                         | Pungli di luar Birokrasi terhadap Kegiatan Usaha                                 | Melihat penanganan yang dilakukan oleh pemerintah daerah terhadap berbagai praktik-praktik pungutan ilegal yang dilakukan oleh orang, kelompok orang/ masyarakat di luar birokrasi, yang mengganggu kegiatan usaha.                                                                                                                                                                                                                                                                                                          | Persepsi Dunia Usaha dan <i>Panel Judgement</i>                      |
| 4                                         | Hubungan Eksekutif - Legislatif                                                  | Melihat hambatan yang ditimbulkan oleh kondisi hubungan antara DPRD dan Pemda                                                                                                                                                                                                                                                                                                                                                                                                                                                | Persepsi Dunia Usaha dan <i>Panel Judgement</i>                      |
| <b>2. Variabel Aparatur dan Pelayanan</b> |                                                                                  |                                                                                                                                                                                                                                                                                                                                                                                                                                                                                                                              |                                                                      |
| 5                                         | Birokrasi Pelayanan terhadap Dunia Usaha                                         | Mengukur kemudahan pelayanan birokrasi dan profesionalisme aparat pemda dalam melakukan pelayanan terhadap dunia usaha.                                                                                                                                                                                                                                                                                                                                                                                                      | Persepsi Dunia Usaha dan <i>Panel Judgement</i>                      |
| 6                                         | Penyalahgunaan Wewenang                                                          | Mengukur distorsi perilaku aparat pemda dalam melakukan pelayanan terhadap dunia usaha.                                                                                                                                                                                                                                                                                                                                                                                                                                      | Persepsi Dunia Usaha dan <i>Panel Judgement</i>                      |
| <b>3. Variabel Keuangan Daerah</b>        |                                                                                  |                                                                                                                                                                                                                                                                                                                                                                                                                                                                                                                              |                                                                      |
| 7                                         | Struktur Pungutan oleh Pemerintah Daerah terhadap Dunia Usaha                    | Untuk melihat struktur berbagai pungutan yang berlaku di daerah, khususnya pajak dan retribusi daerah.                                                                                                                                                                                                                                                                                                                                                                                                                       | Rasio Penerimaan Retribusi terhadap Pajak dalam APBD Kabupaten /Kota |
| 8                                         | Komitmen Pemerintah Daerah dalam Penyediaan Sarana Pendukung Kegiatan Usaha      | Mengukur komitmen pemerintah daerah dalam melakukan pembangunan infrastruktur fisik yang diperlukan untuk mendukung kegiatan usaha, yang tercermin dari pengalokasian dana untuk anggaran pembangunan.                                                                                                                                                                                                                                                                                                                       | Rasio Anggaran Pembangunan terhadap APBD Kabupaten / Kota            |
| <b>4. Variabel Perda</b>                  |                                                                                  |                                                                                                                                                                                                                                                                                                                                                                                                                                                                                                                              |                                                                      |
| 9                                         | Peraturan Produk Hukum Daerah (Pajak dan Retribusi)                              | Mengukur kualitas kebijakan / produk hukum yang dibuat oleh pemerintah daerah (Perda, SK Bupati/ Wali Kota dan Sebagainya) khususnya yang berkaitan dengan dunia usaha. Beberapa aspek yang dinilai dari peraturan / kebijakan daerah tersebut adalah aspek yuridis, filosofi, substansi, maupun prinsip dan dampak yang mungkin ditimbulkan dari pemberlakuan produk hukum tersebut. Beberapa hal yang dilihat adalah peraturan yang berkaitan dengan pelayanan, pungutan, penetapan harga, ketenagakerjaan dan sebagainya. | Analisis Tingkat Kebermasalahan Perda Daerah Kabupaten / Kota        |
| <b>B. FAKTOR KONDISI SOSPOL</b>           |                                                                                  |                                                                                                                                                                                                                                                                                                                                                                                                                                                                                                                              |                                                                      |
| <b>1. Variabel Keamanan</b>               |                                                                                  |                                                                                                                                                                                                                                                                                                                                                                                                                                                                                                                              |                                                                      |
| 10                                        | Gangguan Keamanan terhadap Aktivitas Dunia Usaha                                 | Mengukur hambatan kegiatan usaha yang ditimbulkan oleh gangguan keamanan terhadap aktivitas usaha.                                                                                                                                                                                                                                                                                                                                                                                                                           | Persepsi Dunia Usaha dan <i>Panel Judgement</i>                      |
| 11                                        | Gangguan Keamanan terhadap Masyarakat Lingkungan Sekitar Tempat Kegiatan Usaha   | Mengukur hambatan keamanan dan rasa aman masyarakat di lingkungan kegiatan usaha.                                                                                                                                                                                                                                                                                                                                                                                                                                            | Persepsi Dunia Usaha dan <i>Panel Judgement</i>                      |
| 12                                        | Kecepatan Aparat Menanggulangi Gangguan Keamanan                                 | Mengukur kualitas aparat keamanan dalam menangani gangguan keamanan / ketertiban umum, serta jaminan dan perlindungan keamanan yang dapat diberikan oleh aparat keamanan di daerah.                                                                                                                                                                                                                                                                                                                                          | Persepsi Dunia Usaha dan <i>Panel Judgement</i>                      |
| <b>2. Variabel Sospol</b>                 |                                                                                  |                                                                                                                                                                                                                                                                                                                                                                                                                                                                                                                              |                                                                      |
| 13                                        | Partisipasi Masyarakat / Dunia Usaha dalam Perumusan Kebijakan Pemerintah Daerah | Mengukur keterbukaan birokrasi terhadap partisipasi masyarakat / dunia usaha dalam perumusan kebijakan yang menyangkut kepentingannya (dunia usaha). Mengukur keterbukaan / peluang masyarakat                                                                                                                                                                                                                                                                                                                               | Persepsi Dunia Usaha dan <i>Panel Judgement</i>                      |

| NO.                                          | FAKTOR - VARIABEL - INDIKATOR                                      | KETERANGAN                                                                                                                                                                                                                                  | UKURAN DAN DATA YANG DIGUNAKAN                                                                    |
|----------------------------------------------|--------------------------------------------------------------------|---------------------------------------------------------------------------------------------------------------------------------------------------------------------------------------------------------------------------------------------|---------------------------------------------------------------------------------------------------|
|                                              |                                                                    | untuk ikut mengawasi pelaksanaan kebijakan.                                                                                                                                                                                                 |                                                                                                   |
| 14                                           | Potensi Konflik di masyarakat                                      | Mengukur potensi hambatan dalam kegiatan usaha yang ditimbulkan oleh konflik sosial di lingkungan usaha.                                                                                                                                    | Persepsi Dunia Usaha dan <i>Panel Judgement</i>                                                   |
| 15                                           | Stabilitas Politik                                                 | Mengukur hambatan dalam kegiatan usaha yang ditimbulkan oleh konflik politik yang ada di daerah.                                                                                                                                            | Persepsi Dunia Usaha dan <i>Panel Judgement</i>                                                   |
| 16                                           | Intensitas Unjuk Rasa                                              | Mengukur intensitas kegiatan unjuk rasa yang dapat menghambat/mengganggu kelancaran kegiatan usaha.                                                                                                                                         | Persepsi Dunia Usaha dan <i>Panel Judgement</i>                                                   |
| <b>3. Variabel Budaya Masyarakat</b>         |                                                                    |                                                                                                                                                                                                                                             |                                                                                                   |
| 17                                           | Keterbukaan Masyarakat terhadap Dunia Usaha                        | Mengukur daya dukung masyarakat terhadap kegiatan usaha dilihat dari penerimaan masyarakat terhadap keberadaan kegiatan usaha, masuknya investasi dari luar daerah dan para pendatang yang melakukan kegiatan usaha / bekerja di daerahnya. | Persepsi Dunia Usaha dan <i>Panel Judgement</i>                                                   |
| 18                                           | Perilaku Masyarakat yang Non Diskriminasi                          | Mengukur daya dukung masyarakat sekitar tempat usaha dilihat dari perlakuannya terhadap orang lain dari luar secara sama tanpa melihat perbedaan yang ada(suku, agama, ras, gender dan sebagainya)                                          | Persepsi Dunia Usaha dan <i>Panel Judgement</i>                                                   |
| 19                                           | Adat Istiadat Masyarakat Daerah                                    | Melihat daya dukung nilai-nilai dan adat-istiadat yang berkembang di masyarakat yang mendukung produktivitas.                                                                                                                               | Persepsi Dunia Usaha dan <i>Panel Judgement</i>                                                   |
| 20                                           | Etos Kerja Masyarakat Daerah                                       | Mengukur daya dukung penduduk, masyarakat, pelaku usaha, dan pekerja di daerah yang menunjukkan etos kerja dan semangat kerja keras dan dapat bersaing secara sehat.                                                                        | Persepsi Dunia Usaha dan <i>Panel Judgement</i>                                                   |
| <b>C. FAKTOR EKONOMI DAERAH</b>              |                                                                    |                                                                                                                                                                                                                                             |                                                                                                   |
| <b>1. Variabel Potensi Ekonomi</b>           |                                                                    |                                                                                                                                                                                                                                             |                                                                                                   |
| 21                                           | Daya Beli Masyarakat                                               | Mengukur tingkat kesejahteraan dilihat dari penghasilan rata-rata masyarakat.                                                                                                                                                               | PDRB Perkapita Kab. / Kota                                                                        |
| 22                                           | Pertumbuhan Ekonomi Daerah                                         | Melihat potensi ekonomi daerah dari proyeksi perkembangan atau pertumbuhan perekonomian di daerah.                                                                                                                                          | Laju Pertumbuhan PDRB Kabupaten / Kota tahun 1996 s/d 2000                                        |
| 23                                           | Kesejahteraan dan Produktivitas Masyarakat                         | Mengukur kesejahteraan dan produktivitas, kualitas hidup penduduk di daerah.                                                                                                                                                                | IPM (Indeks Pembangunan Manusia)                                                                  |
| <b>2. Variabel Struktur Ekonomi</b>          |                                                                    |                                                                                                                                                                                                                                             |                                                                                                   |
| 24                                           | Nilai Tambah Sektor Primer                                         | Untuk melihat struktur perekonomian daerah dan yang berbasis pada SDA                                                                                                                                                                       | Nilai Tambah Sektor Primer (Rasio PDRB Sektor Primer diluar Pertanian Pangan terhadap total PDRB) |
| 25                                           | Nilai Tambah Sektor Sekunder                                       | Mengukur struktur perekonomian daerah yang sudah terbiasa dalam kegiatan ekonomi produktif, dan industrialisasi.                                                                                                                            | Nilai Tambah Sektor Sekunder (Rasio PDRB Sektor Sekunder terhadap total PDRB)                     |
| 26                                           | Nilai Tambah Sektor Tersier                                        | Mengukur Kemampuan Jasa Lembaga Keuangan dalam perekonomian daerah.                                                                                                                                                                         | Nilai Tambah Sektor Tersier (Rasio PDRB Sektor Tersier terhadap total PDRB)                       |
| <b>D. FAKTOR TENAGA KERJA</b>                |                                                                    |                                                                                                                                                                                                                                             |                                                                                                   |
| <b>1. Variabel Ketersediaan Tenaga Kerja</b> |                                                                    |                                                                                                                                                                                                                                             |                                                                                                   |
| 27                                           | Ketersediaan Tenaga Kerja Usia Produktif                           | Mengukur besarnya penduduk usia produktif yang dibutuhkan sebagai tenaga kerja pada kegiatan usaha.                                                                                                                                         | Rasio Jumlah Penduduk Usia Produktif terhadap Jumlah Penduduk Daerah Kab./Kota                    |
| 28                                           | Ketersediaan Tenaga Kerja Berpengalaman Berpendidikan Minimal SLTP | Mengukur ketersediaan tenaga kerja yang sudah berpengalaman sebagai tenaga kerja pada sektor kegiatan usaha secara formal.                                                                                                                  | Rasio Jumlah Tenaga Kerja Berpendidikan SLTP terhadap Jumlah Tenaga Kerja di Kabupaten / Kota     |
| 29                                           | Ketersediaan Tenaga Kerja Pencari Kerja                            | Mengukur ketersediaan pencari kerja untuk mengisi lapangan pekerjaan yang dibutuhkan oleh dunia usaha.                                                                                                                                      | Rasio Penduduk Pencari Kerja Terhadap Jumlah Angkatan Kerja di Kabupaten / Kota                   |
| <b>2. Variabel Biaya Tenaga Kerja</b>        |                                                                    |                                                                                                                                                                                                                                             |                                                                                                   |
| 30                                           | Biaya Tenaga Kerja berdasarkan Aturan Formal                       | Mengukur tingkat kompensasi untuk pekerja secara keseluruhan berdasarkan aturan formal sebagai biaya yang dikeluarkan oleh pengusaha.                                                                                                       | Rasio Upah Minimum Propinsi atau Kabupaten terhadap IHK                                           |



| NO.                                                        | FAKTOR - VARIABEL - INDIKATOR            | KETERANGAN                                                                                                                      | UKURAN DAN DATA YANG DIGUNAKAN                                                                                                   |
|------------------------------------------------------------|------------------------------------------|---------------------------------------------------------------------------------------------------------------------------------|----------------------------------------------------------------------------------------------------------------------------------|
| 31                                                         | Biaya Tenaga Kerja Aktual                | Mengukur biaya tenaga kerja berdasarkan sektor-sektor usaha yang sesungguhnya akan dikeluarkan oleh pengusaha.                  | Rasio Upah Yang Diterima Pekerja terhadap IHK                                                                                    |
| <b>3. Variabel Produktivitas dan Kualitas Tenaga Kerja</b> |                                          |                                                                                                                                 |                                                                                                                                  |
| 32                                                         | Produktivitas Tenaga Kerja               | Mengukur Produktivitas pekerja sektor manufaktur.                                                                               | Rasio Nilai Tambah PDRB Sektor Manufaktur terhadap Jumlah Tenaga Kerja Manufaktur                                                |
| <b>E. FAKTOR INFRASTRUKTUR</b>                             |                                          |                                                                                                                                 |                                                                                                                                  |
| <b>1. Variabel Ketersediaan Infrastruktur</b>              |                                          |                                                                                                                                 |                                                                                                                                  |
| 33                                                         | Ketersediaan Jalan                       | Mengukur Ketersediaan Infrastruktur untuk Transportasi Darat                                                                    | Rasio Panjang Jalan Yang ada di Kabupaten/Kota terhadap Luas Wilayah, Persepsi Pelaku Usaha & <i>Panel Judgement</i>             |
| 34                                                         | Ketersediaan Pelabuhan Laut              | Mengukur Ketersediaan Infrastruktur Transportasi Laut                                                                           | Keberadaan atau Jarak dengan Pelabuhan Laut (Km), Persepsi Pelaku Usaha & <i>Panel Judgement</i>                                 |
| 35                                                         | Ketersediaan Pelabuhan Udara             | Mengukur Ketersediaan Infrastruktur Transportasi Udara.                                                                         | Keberadaan atau Jarak dengan Pelabuhan Udara (Km), Persepsi Pelaku Usaha & <i>Panel Judgement</i>                                |
| 36                                                         | Ketersediaan Saluran (sambungan) Telpon  | Mengukur Ketersediaan Sarana Komunikasi.                                                                                        | Jumlah Sambungan Telpon Perkapita dan Persepsi Pelaku Usaha & <i>Panel Judgement</i>                                             |
| 37                                                         | Ketersediaan Saluran (sambungan) Listrik | Mengukur Ketersediaan Listrik untuk Sebagai sumber Energi untuk Aktivitas Usaha.                                                | Produksi Listrik / KWH listrik yang tersedia dan Persepsi Pelaku Usaha & <i>Panel Judgement</i>                                  |
| <b>2. Variabel Kualitas Infrastruktur</b>                  |                                          |                                                                                                                                 |                                                                                                                                  |
| 38                                                         | Kualitas Jalan                           | Mengukur kualitas infrastruktur fisik yang tersedia di daerah, sebagai penunjang kegiatan usaha.                                | Rasio Pajang Jalan dengan kualitas baik terhadap total                                                                           |
| 39                                                         | Akses & Tipe Pelabuhan Laut              | Mengukur kemudahan akses, kelancaran, dan kapasitas sarana transportasi laut, sebagai penunjang kegiatan usaha.                 | panjang jalan, Persepsi Pelaku Usaha & <i>Panel Judgement</i>                                                                    |
| 40                                                         | Akses & Tipe Pelabuhan Udara             | Mengukur kemudahan dan kelancaran sarana transportasi udara yang tersedia di daerah untuk mempermudah aktivitas bisnis / usaha. | Tipe dan Kapasitas Pelabuhan Laut serta Rata-rata Pemberangkatan Kapal Perminggu, Persepsi Pelaku Usaha & <i>Panel Judgement</i> |
| 41                                                         | Kualitas Sambungan Telpon                | Mengukur kualitas kelancaran sarana komunikasi di daerah                                                                        | Tipe Pelabuhan Udara dan Rata-rata Penerbangan Pesawat Perminggu, Persepsi Pelaku Usaha & <i>Panel Judgement</i>                 |
| 42                                                         | Kualitas Suplai Listrik                  | Mengukur kualitas sumber energi sarana pendukung kegiatan usaha.                                                                | Persepsi Pelaku Usaha & <i>Panel Judgement</i> , Daerah Kabupaten/Kota dan Propinsi Dalam Angka                                  |

# Appendix 4.

## Factor, Variables, and Indicators, Rating Intensity

### List of Factors - VariableS - Indicators

| NO.                                             | FACTORS - VARIABLE - INDICATORS                                                          | REMARK                                                                                                                                                                                                                                                                                                                                                                                                                                     | MEASUREMENT AND DATA USED                                   |
|-------------------------------------------------|------------------------------------------------------------------------------------------|--------------------------------------------------------------------------------------------------------------------------------------------------------------------------------------------------------------------------------------------------------------------------------------------------------------------------------------------------------------------------------------------------------------------------------------------|-------------------------------------------------------------|
| <b>A. INSTITUTIONAL FACTOR</b>                  |                                                                                          |                                                                                                                                                                                                                                                                                                                                                                                                                                            |                                                             |
| <b>1. Variable of Law Certainty</b>             |                                                                                          |                                                                                                                                                                                                                                                                                                                                                                                                                                            |                                                             |
| 1                                               | Consistency of Regulations                                                               | Measures the certainty, clarity, and consistency in enforcement of regional regulations and other policies regulating business                                                                                                                                                                                                                                                                                                             | Perception of Business Community and <i>Panel Judgement</i> |
| 2                                               | Law Enforcement                                                                          | Measures law certainty such as protection on work contract and ownership right, consistency of court decisions especially those related to business                                                                                                                                                                                                                                                                                        | Perception of Business Community and <i>Panel Judgement</i> |
| 3                                               | Illegal Levy Outside Bureaucracy                                                         | Portrays regional government's settlement of illegal practice in levy conducted by people or group of people outside bureaucracy that disturbs business                                                                                                                                                                                                                                                                                    | Perception of Business Community and <i>Panel Judgement</i> |
| 4                                               | Excecutive - Legislative Relations                                                       | Captures problems caused by poor relations between DPRD and Regional Government                                                                                                                                                                                                                                                                                                                                                            | Perception of Business Community and <i>Panel Judgement</i> |
| <b>2. Variable of Apparatus and Service</b>     |                                                                                          |                                                                                                                                                                                                                                                                                                                                                                                                                                            |                                                             |
| 5                                               | Service Procedure                                                                        | Measures the quality of government service and professionalism of government apparatus in providing service to business community                                                                                                                                                                                                                                                                                                          | Perception of Business Community and <i>Panel Judgement</i> |
| 6                                               | Abuse of Authority                                                                       | Measures the distortion of regional government apparatus in providing service to business community                                                                                                                                                                                                                                                                                                                                        | Perception of Business Community and <i>Panel Judgement</i> |
| <b>3. Variable of Regional Finance</b>          |                                                                                          |                                                                                                                                                                                                                                                                                                                                                                                                                                            |                                                             |
| 7                                               | Structure of Levies Imposed by Regional Government to Business Community                 | Analyzes the structure of levies applicable in the region, especially regional tax and regional retribution                                                                                                                                                                                                                                                                                                                                | Ratio of Retribution to Tax in APBD                         |
| 8                                               | Regional Government's Commitment in Providing Supporting Facility for Business Community | Measures the commitment of regional government in developing physical infrastructure needed to support business activities manifested in fund allocation in development budget                                                                                                                                                                                                                                                             | Ratio of Development Budget to APBD                         |
| <b>4. Variable of Regional Regulation</b>       |                                                                                          |                                                                                                                                                                                                                                                                                                                                                                                                                                            |                                                             |
| 9                                               | Legal Product of the Region (Tax and Retribution)                                        | Assesses the quality of policies/legal products made by regional government (regional regulations, Decision of Regent/Mayor, etc.) especially those related to business community. Several aspects are examined from those regulations such as juridical aspect, philosophy, substance, principlles, and effects that might produce by said legal products. Regulations related to service, levy, pricing, labor, and so on are the focus. | Analysis on the Problem of Regional Regulation              |
| <b>B. SOCIO-POLITICAL FACTOR</b>                |                                                                                          |                                                                                                                                                                                                                                                                                                                                                                                                                                            |                                                             |
| <b>1. Variable of Security</b>                  |                                                                                          |                                                                                                                                                                                                                                                                                                                                                                                                                                            |                                                             |
| 10                                              | Business Security                                                                        | Measures security disturbance to business community                                                                                                                                                                                                                                                                                                                                                                                        | Perception of Business Community and <i>Panel Judgement</i> |
| 11                                              | Community Security                                                                       | Measures sense of security and disturbance to community around business site                                                                                                                                                                                                                                                                                                                                                               | Perception of Business Community and <i>Panel Judgement</i> |
| 12                                              | Quick Response of Security Officers in Handling Security Issues                          | Measures the quality of security officers in handling security disturbance, and guarantee and protection provided by security officers in the region                                                                                                                                                                                                                                                                                       | Perception of Business Community and <i>Panel Judgement</i> |
| <b>2. Variable of Socio-Political Condition</b> |                                                                                          |                                                                                                                                                                                                                                                                                                                                                                                                                                            |                                                             |
| 13                                              | Public Participation                                                                     | Measures the openness of the bureaucracy for public participation or participation of business community in policy formulation especially those related to their concern. Measures public access in control of policy implementation                                                                                                                                                                                                       | Perception of Business Community and <i>Panel Judgement</i> |
| 14                                              | Social Conflict                                                                          | Measures the extent to which social conflict surrounding influences business activity                                                                                                                                                                                                                                                                                                                                                      | Perception of Business Community and <i>Panel Judgement</i> |

| NO.                                                  | FACTORS - VARIABLE - INDICATORS                                                         | REMARK                                                                                                                                                                                              | MEASUREMENT AND DATA USED                                                                              |
|------------------------------------------------------|-----------------------------------------------------------------------------------------|-----------------------------------------------------------------------------------------------------------------------------------------------------------------------------------------------------|--------------------------------------------------------------------------------------------------------|
| 15                                                   | Political Stability                                                                     | Measures the extent to which political conflict in the regions influences business activity                                                                                                         | Perception of Business Community and <i>Panel Judgement</i>                                            |
| 16                                                   | Intensity of Demonstration                                                              | Measures the extent to which demonstrations disturb business activity                                                                                                                               | Perception of Business Community and <i>Panel Judgement</i>                                            |
| <b>3. Variable of Socio-Cultural Condition</b>       |                                                                                         |                                                                                                                                                                                                     |                                                                                                        |
| 17                                                   | Community Openness toward Business Community                                            | Measures the capacity of people in supporting business activity in terms of their openness to business community, investment and people from outside the region coming in to do business or to work | Perception of Business Community and <i>Panel Judgement</i>                                            |
| 18                                                   | Absence of Non-Discriminatory Culture                                                   | Measures the capacity of surrounding people in terms of their non-discriminatory attitude in relation to ethnic, religion, gender, race, etc.                                                       | Perception of Business Community and <i>Panel Judgement</i>                                            |
| 19                                                   | Society's Customs                                                                       | Measures the society's values and customs in terms of their conduciveness and orientation to productivity                                                                                           | Perception of Business Community and <i>Panel Judgement</i>                                            |
| 20                                                   | Community's Working Ethos                                                               | Measures the capacity of people, business community, and workers in the regions in terms of their working ethos and readiness to fair competition                                                   | Perception of Business Community and <i>Panel Judgement</i>                                            |
| <b>C. REGIONAL ECONOMY FACTOR</b>                    |                                                                                         |                                                                                                                                                                                                     |                                                                                                        |
| <b>1. Variable of Economic Potential</b>             |                                                                                         |                                                                                                                                                                                                     |                                                                                                        |
| 21                                                   | Community's Purchasing Power                                                            | Measures welfare in terms of average income of people                                                                                                                                               | Regency/City PDRB per Capita                                                                           |
| 22                                                   | Regional Economic Growth                                                                | Measures regional economic potential in terms of their potential growth                                                                                                                             | Regency/City PDRB Growth Rate Year 1996-2000                                                           |
| 23                                                   | Social Welfare and Productivity                                                         | Measures welfare and productivity, as well as quality of people's life in the region                                                                                                                | Human Development Index (IPM)                                                                          |
| <b>2. Variable of Economic Structure</b>             |                                                                                         |                                                                                                                                                                                                     |                                                                                                        |
| 24                                                   | Value Added of Primary Sectors                                                          | Measures the extent to which the regional economy is relying on natural resources                                                                                                                   | Value Added of Primary Sectors (Ratio of PDRB of Primary Sectors apart from Agriculture to Total PDRB) |
| 25                                                   | Value Added of Secondary Sectors                                                        | Measures the extent to which people are accustomed with productive activity in manufacturing activities                                                                                             | Value Added of Secondary Sectors (Ratio of PDRB of Secondary Sectors to Total PDRB)                    |
| 26                                                   | Value Added of Tertiary Sectors                                                         | Measures the capacity of financial institutions, trading and Service in the region                                                                                                                  | Value Added of Tertiary Sectors (Ratio of PDRB of Tertiary Sectors to Total PDRB)                      |
| <b>D. LABOR AND PRODUCTIVITY FACTOR</b>              |                                                                                         |                                                                                                                                                                                                     |                                                                                                        |
| <b>1. Variable of Manpower Availability</b>          |                                                                                         |                                                                                                                                                                                                     |                                                                                                        |
| 27                                                   | Productive-Age Labor Availability                                                       | Measures the size of productive-age population of workers needed in business activities                                                                                                             | Ratio of Productive-Age Population over Total Population                                               |
| 28                                                   | Availability of skilled Workers with at least Junior High School Educational Background | Measures the availability of workers having experience as workers in formal business organization                                                                                                   | Ratio of Workers of at least Junior High School to Total Labor Force                                   |
| 29                                                   | Availability of Job Seeker                                                              | Measures the availability of job seekers to fill up jobs required in business activities                                                                                                            | Ratio of Job Seeker to Labor Force                                                                     |
| <b>2. Variable of Labor Cost</b>                     |                                                                                         |                                                                                                                                                                                                     |                                                                                                        |
| 30                                                   | Labor Cost based on Formal Regulation                                                   | Measures average level of compensation for all workers as regulated officially which is the cost that must be shouldered by businessmen                                                             | Ratio of Provincial/City Minimum Wage to Consumer Price Index (IHK)                                    |
| 31                                                   | Actual Labor Cost                                                                       | Measures labor cost based on sectors to be shouldered by businessmen                                                                                                                                | Ratio of Actual Salary to Consumer Price Index (IHK)                                                   |
| <b>3. Variable of Labor Productivity and Quality</b> |                                                                                         |                                                                                                                                                                                                     |                                                                                                        |
| 32                                                   | Labor Productivity                                                                      | Measures the productivity of workers in manufacturing sectors                                                                                                                                       | Ratio of Value Added of Manufacturing Sector to Total Workers in Manufacturing Sector                  |

| NO.                                               | FACTORS - VARIABLE - INDICATORS     | REMARK                                                                                                       | MEASUREMENT AND DATA USED                                                                                                                   |
|---------------------------------------------------|-------------------------------------|--------------------------------------------------------------------------------------------------------------|---------------------------------------------------------------------------------------------------------------------------------------------|
| <b>E. INFRASTRUCTURE FACTOR</b>                   |                                     |                                                                                                              |                                                                                                                                             |
| <b>1. Variable of Infrastructure Availability</b> |                                     |                                                                                                              |                                                                                                                                             |
| 33                                                | Availability of Streets             | Measures the availability of infrastructure for land transportation                                          | Ratio of the Length of the Streets in the City/Regency over Region's area; Perception of Business Community and <i>Panel Judgment</i>       |
| 34                                                | Availability of Sea Port            | Measures the availability of infrastructure for sea transportation                                           | Availability or Distance to Sea Port (Km); Perception of Business Community and <i>Panel Judgment</i> .                                     |
| 35                                                | Availability of Airport             | Measures the availability of infrastructure for air transportation                                           | Availability or Distance to Airport (Km); Perception of Business Community and <i>Panel Judgment</i> .                                      |
| 36                                                | Availability of Telephone Service   | Measures the availability of communication facility                                                          | Number of Telephone Lines per Capita; Perception of Business Community and <i>Panel Judgment</i>                                            |
| 37                                                | Availability of Electricity Service | Measures the availability of electricity as source of power for business activity                            | Production of Electricity/KWH of Available Electricity ; Perception of Business Community and <i>Panel Judgment</i>                         |
| <b>2. Variable of Infrastructure Quality</b>      |                                     |                                                                                                              |                                                                                                                                             |
| 38                                                | Quality of Streets                  | Measures the quality of physical infrastructure in the region as support for business activity               | Ratio of the Length of Streets with Good Quality over Total Length of Streets; Perception of Business Community and <i>Panel Judgment</i> . |
| 39                                                | Sea Port Accessibility and Type     | Measures access, smoothness, and capacity of sea transportation facilities as support for business activity  | Type and Capacity of Sea Port and Average Departure per Week; Perception of Business Community and <i>Panel Judgment</i>                    |
| 40                                                | Airport Accessibility and Type      | Measures access and smoothness of air transportation facility in the region as support for business activity | Type of Airport and Average Flight per Week; Perception of Business Community and <i>Panel Judgment</i>                                     |
| 41                                                | Quality of Telephone Service        | Measures the quality of communication facilities in the region                                               | Perception of Business Community and <i>Panel Judgment</i> , Regency/City and Province in Figures                                           |
| 42                                                | Quality of Electricity Service      | Measures the quality of energy sources as support for business activities                                    | Perception of Business Community and <i>Panel Judgment</i> , Regency/City and Province in Figures                                           |



Sebelum diproses dengan perangkat lunak 'expert choice' untuk memperoleh skor intensitas tiap indikator berdasarkan metode AHP, setiap indikator yang berupa *existing statistic data* harus diklasifikasikan ke dalam intensitas yang sudah ditentukan (Sangat Tinggi, Tinggi, Sedang, Rendah, Sangat Rendah, dan sebagainya). Pengklasifikasian indikator ke dalam intensitas-intensitasnya dilakukan dengan menggunakan metode yang berikut ini :

#### A. Sistem Klasifikasi Intensitas untuk Indikator

Dalam melakukan penilaian untuk menentukan daya tarik daerah terhadap investasi terlebih dahulu dilakukan klasifikasi intensitas setiap indikator, misalnya Tinggi, Sedang, Rendah, dan Sangat Rendah. Pengklasifikasian setiap sub indikator tersebut dilakukan dengan 2 macam pendekatan yaitu: (1) Metode A (Metode Rata-rata), dan (2) Metode B (Metode Distribusi).

##### Metode A

(Metode Rata-rata) adalah metode yang membandingkan besaran/nilai tiap daerah terhadap nilai rata-rata keseluruhan daerah. Semakin dekat dengan nilai rata-rata tertimbang keseluruhan daerah yang diperingkat, semakin besar klasifikasi intensitasnya, yang berarti kesenjangan antar daerah semakin berkurang.

##### Metode B

(Metode Distribusi) adalah metode rata-rata yang mempertimbangkan distribusi data. Penghitungan klasifikasi intensitas dengan metode ini disesuaikan dengan kemencengan dan keruncingan kurva sebaran data.

Pada dasarnya kedua metode tersebut menggunakan nilai acuan tertentu sebagai dasar menentukan klasifikasi intensitas masing-masing indikator. Semakin kecil nilai indikator dibandingkan nilai acuannya, semakin kecil pula klasifikasi intensitas yang didapat. Sedangkan semakin besar nilai indikator dibandingkan nilai acuannya semakin besar pula klasifikasi intensitas yang didapat.

#### B. Nilai Acuan

Nilai acuan untuk setiap indikator berbeda tergantung dari metode yang digunakan.

Metode A, misalnya, nilai acuan didasarkan pada

*Each indicator was given categories of intensity (Extremely High, High, Moderate, Low, Extremely Low and so forth) used to rate existing statistical data before it was processed using the 'expert choice' software based on the AHP method. The classification of indicator into levels of intensity was done following the method below:*

#### A. Intensity Classification System for Indicator

*The factors determining the attractiveness of a region to investment was evaluated by, first, determining the categories of intensity of each indicator, for instance, High, Moderate, Low and Extremely Low. The classification of each indicator was determined using these two approaches: (1) A Method (Mean method) and (2) B Method (Distribution Method).*

##### A Method

*(Mean Method) is a method used to compare the value of each area against the mean value of the entire regions. The closer the value of an area in proportion to the mean weighed value of the entire areas, the closer the region is in relation to the average value of the entire regions in terms of such indicator. The more the regions showing this level of intensity closer to the average value the better the distribution of the regions.*

##### B Method

*(Distribution Method) is a mean method that takes into account the distribution of the data. The classification of the indicator using this method was adjusted based on the skewness and kurtosis of the curve of data distribution.*

*Basically, both methods employ certain reference value as a basis in the determination of the level of intensity of each indicator. For the positive indicators, the smaller the value of the indicator compared to the reference value, the lower the intensity of the indicator. Meanwhile, the bigger the value of the indicator compared to the reference value, the higher the intensity of said indicator.*

#### B. Reference Value

*Each indicator has different reference value that depends on the method used:*

*In A method, for instance, the reference value is based on the mean value of indicator. For example,*

nilai rata-rata dari indikator. Sebagai contoh, untuk menghitung klasifikasi intensitas indikator PDRB per kapita suatu daerah kabupaten, nilai acuan dihitung berdasarkan rata-rata indikator PDRB per kapita seluruh kabupaten/kota.

Pada metode B, nilai acuan didasarkan pada rata-rata nilai indikator dengan memperhatikan sebaran dan bentuknya yaitu *standar deviasi*, *kurtosis* (keruncingan), dan *skewness* (kemencengan).

### C. Alasan Penggunaan Metode

1. Alasan pemilihan metode A adalah bahwa:
  - Jika nilai indikator (misalnya : Nilai PDRB Perkapita atau Nilai Laju Pertumbuhan PDRB) suatu daerah mendekati nilai rata-rata, berarti bahwa persebaran nilai antar daerah semakin berkurang.
  - Dalam distribusi/keadaan normal, rata-rata = median = modus.
2. Alasan pemilihan metode B adalah bahwa distribusi nilai setiap indikator yang diteliti untuk menentukan daya tarik daerah terhadap investasi sangat beragam. Sebagian indikator distribusi nilainya berbentuk menceng ke kiri, sebagian menceng kanan, dan beberapa diantaranya ada yang berpola mendekati distribusi normal. Oleh karena itu, untuk membuat klasifikasi intensitas tidak hanya didasarkan pada standar deviasi saja, tetapi juga melihat kemencengan (*skewness*) dan keruncingan (*kurtosis*).

### D. Sistem Klasifikasi Intensitas Berbagai Macam Metode B

Dalam aplikasinya, metode B dikembangkan dalam beberapa bentuk yaitu B, B1, B2, B3, dan B4. Sistem klasifikasi intensitas untuk setiap metode B adalah sebagai berikut:

*to classify the intensity of PDRB indicator per capita in one regency, reference value is calculated based on the mean value of PDRB per capita for the entire regencies/cities.*

*In B method, reference value is based on the mean value of indicator by paying attention to distribution and form of standard deviation, kurtosis and skewness.*

### C. Rationale for Using Method

1. A Method is used:
  - *If the value of the indicators (suppose the value of PDRB per capita or value for PDRB growth rate) in more regions is closer to the mean value, it means that the value among regions is evenly distributed.*
  - *In normal distribution/condition, mean = median = mode.*
2. B Method is used if the values of an indicator used in the determination of regional attractiveness to investment are highly unevenly distributed. Part of the values of a concerned indicator is skewed to the left, some parts are to the right, while some others distributed around the normal distribution. Therefore, to classify the intensity of such an indicator, attention should be given to the skewness and kurtosis.

### D. Intensity Classification System for Various Kinds of B Method

*In application, B method is developed into several forms namely B, B1, B2, B3 and B4. Intensity classification systems for each of B method are as follows:*

**Tabel 1:**  
**Penentuan Klasifikasi Intensitas Metode B / Classification of Intensity for B Method**

| Klasifikasi Intensitas / Intensity | Interval Nilai / Interval of Value                      |                                                         |
|------------------------------------|---------------------------------------------------------|---------------------------------------------------------|
|                                    | Indikator Positif / Positive Indicator                  | Indikator Negatif / Negative Indicator                  |
| Sangat Tinggi / Extremely High     | $\partial \geq X + SD$                                  | $\partial \leq X - SD$                                  |
| Tinggi / High                      | $X + \frac{1}{2} SD \leq \partial < X + SD$             | $X - \frac{1}{2} SD \leq \partial < X - SD$             |
| Sedang / Moderate                  | $X - \frac{1}{2} SD \leq \partial < X + \frac{1}{2} SD$ | $X - \frac{1}{2} SD < \partial \leq X + \frac{1}{2} SD$ |
| Rendah / Low                       | $X - \frac{1}{2} SD < \partial \leq X - SD$             | $X + \frac{1}{2} SD < \partial \leq X + SD$             |
| Sangat Rendah / Extremely Low      | $\partial < X - SD$                                     | $\partial > X + SD$                                     |

**Keterangan / Note** :  $\partial$  = Nilai Indikator / Indicator Value;  $\bar{X}$  = Rata-rata / Mean; SD = Standar Deviasi / Standard Deviation

**Tabel 2 :**  
**Penentuan Klasifikasi Intensitas Metode B1 / Classification of Intensity for B1 Method**

| Klasifikasi Intensitas / Intensity | Interval Nilai / Interval of Value                              |                                                                 |
|------------------------------------|-----------------------------------------------------------------|-----------------------------------------------------------------|
|                                    | Indikator Positif / Positive Indicator                          | Indikator Negatif / Negative Indicator                          |
| Sangat Tinggi / Extremely High     | $\partial \geq X + K_4 SD$                                      | $\partial \leq X - K_4 SD$                                      |
| Tinggi / High                      | $X + \frac{1}{2} K_4 SD \leq \partial < X + K_4 SD$             | $X - \frac{1}{2} SD \leq \partial < X - K_4 SD$                 |
| Sedang / Moderate                  | $X - \frac{1}{2} K_4 SD \leq \partial < X + \frac{1}{2} K_4 SD$ | $X - \frac{1}{2} K_4 SD < \partial \leq X + \frac{1}{2} K_4 SD$ |
| Rendah / Low                       | $X - \frac{1}{2} K_4 SD < \partial \leq X - K_4 SD$             | $X + \frac{1}{2} K_4 SD < \partial \leq X + K_4 SD$             |
| Sangat Rendah / Extremely Low      | $\partial < X - K_4 SD$                                         | $\partial > X + K_4 SD$                                         |

**Keterangan / Note :**  $\partial$  = Nilai Indikator / Indicator Value;  $\bar{X}$  = Rata-rata / Mean;  $K_4$  = Keruncingan / Kurtosis; SD = Standar Deviasi / Standard Deviation

**Tabel 3 :**  
**Penentuan Klasifikasi Intensitas Metode B2 / Classification of Intensity for B2 Method**

| Klasifikasi Intensitas / Intensity | Interval Nilai / Interval of Value                              |                                                                 |
|------------------------------------|-----------------------------------------------------------------|-----------------------------------------------------------------|
|                                    | Indikator Positif / Positive Indicator                          | Indikator Negatif / Negative Indicator                          |
| Sangat Tinggi / Extremely High     | $\partial \geq X + K_3 SD$                                      | $\partial \leq X - K_3 SD$                                      |
| Tinggi / High                      | $X + \frac{1}{2} K_3 SD \leq \partial < X + K_3 SD$             | $X - \frac{1}{2} K_3 SD \leq \partial < X - K_3 SD$             |
| Sedang / Moderate                  | $X - \frac{1}{2} K_3 SD \leq \partial < X + \frac{1}{2} K_3 SD$ | $X - \frac{1}{2} K_3 SD < \partial \leq X + \frac{1}{2} K_3 SD$ |
| Rendah / Low                       | $X - \frac{1}{2} K_3 SD < \partial \leq X - K_3 SD$             | $X + \frac{1}{2} K_3 SD < \partial \leq X + K_3 SD$             |
| Sangat Rendah / Extremely Low      | $\partial < X - K_3 SD$                                         | $\partial > X + K_3 SD$                                         |

**Keterangan / Note :**  $\partial$  = Nilai Indikator / Indicator Value;  $\bar{X}$  = Rata-rata / Mean;  $K_3$  = Kemencengan / Skewness; SD = Standar Deviasi / Standard Deviation

**Tabel 4 :**  
**Penentuan Klasifikasi Intensitas Metode B3 / Classification of Intensity for B3 Method**

| Klasifikasi Intensitas / Intensity | Interval Nilai / Interval of Value                        |                                                           |
|------------------------------------|-----------------------------------------------------------|-----------------------------------------------------------|
|                                    | Indikator Positif / Positive Indicator                    | Indikator Negatif / Negative Indicator                    |
| Sangat Tinggi / Extremely High     | $\partial \geq X + Met$                                   | $\partial \leq X - Met$                                   |
| Tinggi / High                      | $X + \frac{1}{2} Met \leq \partial < X + Met$             | $X - \frac{1}{2} Met \leq \partial < X - Met$             |
| Sedang / Moderate                  | $X - \frac{1}{2} Met \leq \partial < X + \frac{1}{2} Met$ | $X - \frac{1}{2} Met < \partial \leq X + \frac{1}{2} Met$ |
| Rendah / Low                       | $X - \frac{1}{2} Met < \partial \leq X - Met$             | $X + \frac{1}{2} Met < \partial \leq X + Met$             |
| Sangat Rendah / Extremely Low      | $\partial < X - Met$                                      | $\partial > X + Met$                                      |

**Keterangan / Note :**  $\partial$  = Nilai Indikator / Indicator Value;  $\bar{X}$  = Rata-rata / Mean; Met =  $(K_4 * SD)$  jika / if  $K_4 \leq 3$ , dan / and Met =  $(K_3 * SD)$  jika / if  $K_4 > 3$ ,

**Tabel 5 :**  
**Penentuan Klasifikasi Intensitas Metode B4 / Classification of Intensity for B4 Method**

| Klasifikasi Intensitas / Intensity | Interval Nilai / Interval of Value                        |                                                           |
|------------------------------------|-----------------------------------------------------------|-----------------------------------------------------------|
|                                    | Indikator Positif / Positive Indicator                    | Indikator Negatif / Negative Indicator                    |
| Sangat Tinggi / Extremely High     | $\partial \geq X + Rat$                                   | $\partial \leq X - Rat$                                   |
| Tinggi / High                      | $X + \frac{1}{2} Rat \leq \partial < X + Rat$             | $X - \frac{1}{2} Rat \leq \partial < X - Rat$             |
| Sedang / Moderate                  | $X - \frac{1}{2} Rat \leq \partial < X + \frac{1}{2} Rat$ | $X - \frac{1}{2} Rat < \partial \leq X + \frac{1}{2} Rat$ |
| Rendah / Low                       | $X - \frac{1}{2} Rat < \partial \leq X - Rat$             | $X + \frac{1}{2} Rat < \partial \leq X + Rat$             |
| Sangat Rendah / Extremely Low      | $\partial < X - Rat$                                      | $\partial > X + Rat$                                      |

**Keterangan / Note :**  $\partial$  = Nilai Indikator / Indicator Value;  $\bar{X}$  = Rata-rata / Mean; Met =  $((K_3 + K_4)/2 * SD)$

E. Rumus-rumus yang digunakan / *Formulas*

1. Rata-rata / *Mean*

$$\bar{X} = \frac{x_1 + x_2 + \dots + x_n}{n}$$

$$\bar{X} = \frac{\sum_{i=1}^n x_i}{n}$$

2. Standar Deviasi / *Standard Deviation*

$$S^2 = \frac{\sum_{i=1}^n (x_i - \bar{x})^2}{n - 1}$$

$$S^2 = \sqrt{\frac{\sum_{i=1}^n (x_i - \bar{x})^2}{n - 1}}$$

3. Keruncingan / *Kurtosis*

$$K_4 = \frac{\sum_{i=1}^n (x_i - \bar{x})^4}{S^4}$$

4. Kemencengan / *Skewness*

$$K_3 = \frac{\sum_{i=1}^n (x_i - \bar{x})^3}{S^3}$$



Lampiran 4.2.

Hasil Klasifikasi Indikator Pemeringkatan

Lampiran 4.2.1. Hasil Klasifikasi Indikator Faktor Kelembagaan

Lampiran 4.2.1.1. Intensitas Indikator Kebijakan/Peraturan Daerah

| No. | Propinsi  | Daerah                    | Intensitas    | No. | Propinsi  | Daerah                    | Intensitas    |
|-----|-----------|---------------------------|---------------|-----|-----------|---------------------------|---------------|
| 1   | SUMUT     | Kab. Asahan               | Distortif     | 68  | JATIM     | Kab. Blitar               | Distortif     |
| 2   | SUMUT     | Kab. Dairi                | Bisa Diterima | 69  | JATIM     | Kab. Kediri               | Bisa Diterima |
| 3   | SUMUT     | Kab. Deli Serdang         | Distortif     | 70  | JATIM     | Kab. Magetan              | Distortif     |
| 4   | SUMUT     | Kab. Langkat              | Distortif     | 71  | JATIM     | Kab. Mojokerto            | Distortif     |
| 5   | SUMUT     | Kab. Simalungun           | Distortif     | 72  | JATIM     | Kab. Pamekasan            | Bisa Diterima |
| 6   | SUMUT     | Kota Binjai               | Bisa Diterima | 73  | JATIM     | Kab. Pasuruan             | Bisa Diterima |
| 7   | SUMUT     | Kota Medan                | Bisa Diterima | 74  | JATIM     | Kab. Sidoarjo             | Suportif      |
| 8   | SUMUT     | Kota Pematang Siantar     | Bisa Diterima | 75  | JATIM     | Kota Kediri               | Distortif     |
| 9   | SUMUT     | Kota Sibolga              | Bisa Diterima | 76  | JATIM     | Kota Malang               | Suportif      |
| 10  | SUMUT     | Kota Tanjung Balai        | Distortif     | 77  | JATIM     | Kota Mojokerto            | Bisa Diterima |
| 11  | SUMUT     | Kota Tebing Tinggi        | Distortif     | 78  | JATIM     | Kota Probolinggo          | Bisa Diterima |
| 12  | SUMBAR    | Kab. Pesisir Selatan      | Distortif     | 78  | JATIM     | Kota Surabaya             | Distortif     |
| 13  | SUMBAR    | Kab. Sawahlunto           | Bisa Diterima | 80  | BALI      | Kab. Badung               | Bisa Diterima |
| 14  | SUMBAR    | Kota Padang               | Bisa Diterima | 81  | BALI      | Kab. Bangli               | Bisa Diterima |
| 15  | SUMBAR    | Kota Sawahlunto           | Bisa Diterima | 82  | BALI      | Kab. Buleleng             | Bisa Diterima |
| 16  | R I A U   | Kab. Bengkalis            | Bisa Diterima | 83  | BALI      | Kab. Gianyar              | Bisa Diterima |
| 17  | R I A U   | Kab. Indragiri Hilir      | Suportif      | 84  | BALI      | Kab. Jembrana             | Suportif      |
| 18  | R I A U   | Kab. Kampar               | Bisa Diterima | 85  | BALI      | Kab. Tabanan              | Suportif      |
| 19  | R I A U   | Kota Batam                | Distortif     | 86  | BALI      | Kota Denpasar             | Bisa Diterima |
| 20  | R I A U   | Kota Pekanbaru            | Bisa Diterima | 87  | KALBAR    | Kab. Kapuas Hulu          | Distortif     |
| 21  | J A M B I | Kab. Batanghari           | Suportif      | 88  | KALBAR    | Kab. Ketapang             | Distortif     |
| 22  | J A M B I | Kab. Bungo                | Distortif     | 89  | KALBAR    | Kab. Pontianak            | Distortif     |
| 23  | J A M B I | Kab. Kerinci              | Bisa Diterima | 90  | KALBAR    | Kab. Sambas               | Bisa Diterima |
| 24  | SUMSEL    | Kab. Muara Enim           | Distortif     | 91  | KALBAR    | Kab. Sanggau              | Distortif     |
| 25  | SUMSEL    | Kab. Musi Banyu Asin      | Bisa Diterima | 92  | KALTENG   | Kab. Barito Sel           | Bisa Diterima |
| 26  | SUMSEL    | Kab. Musi Rawas           | Suportif      | 93  | KALTENG   | Kab. Barito Utara         | Bisa Diterima |
| 27  | SUMSEL    | Kab. Ogan Komerling Iilir | Distortif     | 94  | KALTENG   | Kab. Kapuas               | Distortif     |
| 28  | SUMSEL    | Kota Palembang            | Bisa Diterima | 95  | KALSEL    | Kab. Hulu Sungai Selatan  | Bisa Diterima |
| 29  | BABEL     | Kota Bangka               | Bisa Diterima | 96  | KALSEL    | Kab. Hulu Sungai Tengah   | Bisa Diterima |
| 30  | BABEL     | Kota Pangkal Pinang       | Distortif     | 97  | KALSEL    | Kab. Hulu Sungai Utara    | Suportif      |
| 31  | BENGGKULU | Kab. Bengkulu Selatan     | Distortif     | 98  | KALSEL    | Kab. Tabalong             | Bisa Diterima |
| 32  | BENGGKULU | Kota Bengkulu             | Bisa Diterima | 99  | KALSEL    | Kab. Tanah laut           | Bisa Diterima |
| 33  | LAMPUNG   | Kab. Lampung Barat        | Bisa Diterima | 100 | KALSEL    | Kab. Tapin                | Distortif     |
| 34  | LAMPUNG   | Kab. Lampung Selatan      | Distortif     | 101 | KALTIM    | Kab. Berau                | Bisa Diterima |
| 35  | LAMPUNG   | Kab. Lampung Timur        | Distortif     | 102 | KALTIM    | Kab. Kutai                | Distortif     |
| 36  | LAMPUNG   | Kota Bandar Lampung       | Bisa Diterima | 103 | KALTIM    | Kab. Paser                | Suportif      |
| 37  | BANTEN    | Kab. Lebak                | Bisa Diterima | 104 | KALTIM    | Kota Balikpapan           | Distortif     |
| 38  | BANTEN    | Kab. Serang               | Bisa Diterima | 105 | KALTIM    | Kota Samarinda            | Bisa Diterima |
| 39  | BANTEN    | Kab. Tangerang            | Suportif      | 106 | SULUT     | Kab. Minahasa             | Bisa Diterima |
| 40  | BANTEN    | Kota Tangerang            | Bisa Diterima | 107 | SULUT     | Kab. Sangihe Talaud       | Distortif     |
| 41  | JABAR     | Kab. Bekasi               | Distortif     | 108 | SULUT     | Kota Bitung               | Distortif     |
| 42  | JABAR     | Kab. Bogor                | Distortif     | 109 | SULUT     | Kota Manado               | Bisa Diterima |
| 43  | JABAR     | Kab. Ciamis               | Bisa Diterima | 110 | GORONTALO | Kab. Gorontalo            | Distortif     |
| 44  | JABAR     | Kab. Cirebon              | Distortif     | 111 | GORONTALO | Kota Gorontalo            | Suportif      |
| 45  | JABAR     | Kab. Garut                | Bisa Diterima | 112 | SULTENG   | Kab. Banggai              | Bisa Diterima |
| 46  | JABAR     | Kab. Indramayu            | Distortif     | 113 | SULTENG   | Kab. Tolitoli             | Bisa Diterima |
| 47  | JABAR     | Kab. Karawang             | Distortif     | 114 | SULTENG   | Kab. Donggala             | Bisa Diterima |
| 48  | JABAR     | Kab. Kuningan             | Suportif      | 115 | SULTENG   | Kab. Morowali             | Bisa Diterima |
| 49  | JABAR     | Kab. Sukabumi             | Distortif     | 116 | SULTENG   | Kab. Poso                 | Bisa Diterima |
| 50  | JABAR     | Kab. Sumedang             | Distortif     | 117 | SULRA     | Kab. Buton                | Suportif      |
| 51  | JABAR     | Kab. Tasikmalaya          | Bisa Diterima | 118 | SULSEL    | Kab. Luwu                 | Suportif      |
| 52  | JABAR     | Kota Bekasi               | Suportif      | 119 | SULRA     | Kab. Kolaka               | Distortif     |
| 53  | JABAR     | Kota Bogor                | Distortif     | 120 | SULSEL    | Kab. Majene               | Distortif     |
| 54  | JABAR     | Kota Cirebon              | Distortif     | 121 | SULSEL    | Kab. Pangkajene           | Bisa Diterima |
| 55  | JABAR     | Kota Sukabumi             | Bisa Diterima | 122 | SULSEL    | Kab. Pinrang              | Bisa Diterima |
| 56  | JATENG    | Kab. Kendal               | Distortif     | 123 | SULSEL    | Kab. Tana Toraja          | Bisa Diterima |
| 57  | JATENG    | Kab. Magelang             | Distortif     | 124 | SULSEL    | Kota Parepare             | Bisa Diterima |
| 58  | JATENG    | Kab. Pekalongan           | Bisa Diterima | 125 | NTB       | Kab. Bima                 | Bisa Diterima |
| 59  | JATENG    | Kab. Pemalang             | Bisa Diterima | 126 | NTB       | Kab. Lombok Barat         | Distortif     |
| 60  | JATENG    | Kab. Sukoharjo            | Distortif     | 127 | NTB       | Kota Mataram              | Distortif     |
| 61  | JATENG    | Kab. Tegal                | Bisa Diterima | 128 | NTT       | Kab. Ende                 | Suportif      |
| 62  | JATENG    | Kota Pekalongan           | Bisa Diterima | 129 | NTT       | Kab. Flores Timur         | Distortif     |
| 63  | JATENG    | Kota Semarang             | Suportif      | 130 | NTT       | Kab. Timor Tengah Selatan | Bisa Diterima |
| 64  | JATENG    | Kota Tegal                | Suportif      | 131 | NTT       | Kab. Timor Tengah Utara   | Bisa Diterima |
| 65  | DIY       | Kota Yogyakarta           | Suportif      | 132 | NTT       | Kota Kupang               | Bisa Diterima |
| 66  | JATIM     | Kab. Bangkalan            | Bisa Diterima | 133 | PAPUA     | Kab. Fak Fak              | Distortif     |
| 67  | JATIM     | Kab. Banyuwangi           | Bisa Diterima | 134 | PAPUA     | Kab. Manokwari            | Distortif     |

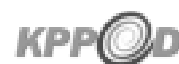

Lampiran 4.2.1.2.  
Indikator Rasio Retribusi Terhadap Pajak

| No. | Propinsi | Kabupaten/Kota             | Retribusi      | Pajak          | Rasio Retribusi thd Pajak | Intensitas |
|-----|----------|----------------------------|----------------|----------------|---------------------------|------------|
| 1   | Sumut    | Kab. Asahan                | 3,487,352,630  | 15,877,638,700 | 21.96                     | KKRSR      |
| 2   | Sumut    | Kab. Dairi                 | 2,717,298,000  | 941,000,000    | 288.77                    | KKRT       |
| 3   | Sumut    | Kab. Deli Serdang          | 9,909,500,000  | 19,824,000,000 | 49.99                     | KKRR       |
| 4   | Sumut    | Kab. Langkat               | 3,292,020,000  | 7,687,551,000  | 42.82                     | KKRR       |
| 5   | Sumut    | Kab. Simalungun            | 5,453,721,000  | 10,102,500,000 | 53.98                     | KKRR       |
| 6   | Sumut    | Kota Binjai                | 2,954,409,000  | 1,857,504,000  | 159.05                    | KKRSD      |
| 7   | Sumut    | Kota Medan                 | 52,276,208,000 | 70,800,000,000 | 73.84                     | KKRR       |
| 8   | Sumut    | Kota Pematang Siantar      | 5,830,660,000  | 4,200,000,000  | 138.83                    | KKRSD      |
| 9   | Sumut    | Kota Sibolga               | 1,951,310,000  | 526,800,000    | 370.41                    | KKRST      |
| 10  | Sumut    | Kota Tanjung Balai         | 3,419,232,000  | 2,271,856,000  | 150.50                    | KKRSD      |
| 11  | Sumut    | Kota Tebing Tinggi         | 1,711,185,000  | 1,839,772,000  | 93.01                     | KKRR       |
| 12  | Sumbar   | Kab. Pesisir Selatan       | 3,335,978,750  | 977,134,000    | 341.40                    | KKRST      |
| 13  | Sumbar   | Kab. Sawah Lunto Sijunjung | 5,049,900,000  | 2,377,000,000  | 212.45                    | KKRSD      |
| 14  | Sumbar   | Kota Padang                | 14,772,434,500 | 35,680,000,000 | 41.40                     | KKRR       |
| 15  | Sumbar   | Kota Sawahlunto            | 800,860,000    | 310,237,000    | 258.14                    | KKRT       |
| 16  | Riau     | Kab. Bengkalis             | 1,777,462,053  | 7,773,000,000  | 22.87                     | KKRSR      |
| 17  | Riau     | Kab. Indragiri Hilir       | 11,232,056,000 | 2,535,000,000  | 443.08                    | KKRST      |
| 18  | Riau     | Kab. Kampar                | 4,535,726,000  | 2,734,566,693  | 165.87                    | KKRSD      |
| 19  | Riau     | Kota Batam                 | 22,105,000,000 | 23,050,000,000 | 95.90                     | KKRR       |
| 20  | Riau     | Kota Pekanbaru             | 18,243,040,500 | 17,145,000,000 | 106.40                    | KKRSD      |
| 21  | Jambi    | Kab. Batanghari            | 5,334,607,232  | 918,500,000    | 580.80                    | KKRST      |
| 22  | Jambi    | Kab. Bungo                 | 6,722,773,859  | 873,367,860    | 769.75                    | KKRST      |
| 23  | Jambi    | Kab. Kerinci               | 2,748,176,000  | 1,296,200,000  | 212.02                    | KKRSD      |
| 24  | Sumsel   | Kab. Muara Enim            | 2,301,973,800  | 9,335,150,000  | 24.66                     | KKRSR      |
| 25  | Sumsel   | Kab. Musi Banyuasin        | 1,158,271,500  | 6,397,295,000  | 18.11                     | KKRSR      |
| 26  | Sumsel   | Kab. Musi Rawas            | 5,271,121,275  | 1,876,025,000  | 280.97                    | KKRT       |
| 27  | Sumsel   | Kab. Ogan Kemiri Ilir      | 2,040,175,000  | 1,492,000,000  | 136.74                    | KKRSD      |
| 28  | Sumsel   | Kota Palembang             | 17,161,478,500 | 18,053,767,800 | 95.06                     | KKRR       |
| 29  | Babel    | Kab. Bangka                | 3,920,410,000  | 7,230,000,000  | 54.22                     | KKRR       |
| 30  | Babel    | Kota Pangkal Pinang        | 4,857,902,000  | 1,837,650,000  | 264.35                    | KKRT       |
| 31  | Bengkulu | Kab. Bengkulu Selatan      | 3,488,241,500  | 2,484,751,500  | 140.39                    | KKRSD      |
| 32  | Bengkulu | Kota Bengkulu              | 2,916,070,000  | 1,865,000,000  | 156.36                    | KKRSD      |
| 33  | Lampung  | Kab. Lampung Barat         | 611,386,000    | 540,667,500    | 113.08                    | KKRSD      |
| 34  | Lampung  | Kab. Lampung Selatan       | 3,439,722,000  | 2,162,500,000  | 159.06                    | KKRSD      |
| 35  | Lampung  | Kab. Lampung Timur         | 1,652,500,000  | 1,427,500,000  | 115.76                    | KKRSD      |
| 36  | Lampung  | Kota Bandar Lampung        | 9,977,999,500  | 19,275,000,000 | 51.77                     | KKRR       |
| 37  | Banten   | Kab. Lebak                 | 7,037,243,680  | 880,728,000    | 799.03                    | KKRST      |
| 38  | Banten   | Kab. Serang                | 22,732,750,000 | 15,600,000,000 | 145.72                    | KKRSD      |
| 39  | Banten   | Kab. Tangerang             | 29,663,000,000 | 58,820,000,000 | 50.43                     | KKRR       |
| 40  | Banten   | Kota Tangerang             | 17,039,500,000 | 39,525,000,000 | 43.11                     | KKRR       |
| 41  | Jabar    | Kab. Bekasi                | 15,723,737,000 | 23,925,140,000 | 65.72                     | KKRR       |
| 42  | Jabar    | Kab. Bogor                 | 34,807,478,000 | 59,310,000,000 | 58.69                     | KKRR       |
| 43  | Jabar    | Kab. Ciamis                | 11,707,000,000 | 3,115,000,000  | 375.83                    | KKRST      |
| 44  | Jabar    | Kab. Cirebon               | 10,750,492,000 | 9,586,600,000  | 112.14                    | KKRSD      |
| 45  | Jabar    | Kab. Garut                 | 18,510,788,120 | 7,487,600,000  | 247.22                    | KKRSD      |
| 46  | Jabar    | Kab. Indramayu             | 11,289,930,000 | 16,694,376,000 | 67.63                     | KKRR       |
| 47  | Jabar    | Kab. Karawang              | 29,971,462,500 | 15,170,000,000 | 197.57                    | KKRSD      |

| No. | Propinsi | Kabupaten/Kota      | Retribusi      | Pajak           | Rasio<br>Retribusi<br>thd Pajak | Intensitas |
|-----|----------|---------------------|----------------|-----------------|---------------------------------|------------|
| 48  | Jabar    | Kab. Kuningan       | 11,508,030,000 | 2,763,080,000   | 416.49                          | KKRST      |
| 49  | Jabar    | Kab. Sukabumi       | 7,853,476,000  | 12,218,000,000  | 64.28                           | KKRR       |
| 50  | Jabar    | Kab. Sumedang       | 16,173,522,704 | 11,087,500,000  | 145.87                          | KKRSD      |
| 51  | Jabar    | Kab. Tasikmalaya    | 4,000,528,880  | 1,376,127,050   | 290.71                          | KKRT       |
| 52  | abar     | Kota Bekasi         | 29,648,378,800 | 24,959,786,453  | 118.78                          | KKRSD      |
| 53  | abar     | Kota Bogor          | 12,874,549,000 | 13,306,700,000  | 96.75                           | KKRR       |
| 54  | abar     | Kota Cirebon        | 6,947,497,750  | 5,135,876,495   | 135.27                          | KKRSD      |
| 55  | abar     | Kota Sukabumi       | 12,735,723,000 | 1,328,000,000   | 959.02                          | KKRST      |
| 56  | ateng    | Kab. Kendal         | 10,912,500,000 | 8,640,000,000   | 126.30                          | KKRSD      |
| 57  | ateng    | Kab. Magelang       | 10,334,093,000 | 12,340,000,000  | 83.74                           | KKRR       |
| 58  | ateng    | Kab. Pekalongan     | 2,909,541,000  | 2,503,422,000   | 116.22                          | KKRSD      |
| 59  | ateng    | Kab. Pemasang       | 8,918,780,000  | 3,903,440,000   | 228.49                          | KKRSD      |
| 60  | ateng    | Kab. Sukoharjo      | 6,762,212,000  | 7,677,000,000   | 88.08                           | KKRR       |
| 61  | ateng    | Kab. Tegal          | 12,771,489,000 | 4,719,500,000   | 270.61                          | KKRT       |
| 62  | Jateng   | Kota Pekalongan     | 2,993,940,350  | 4,008,483,000   | 74.69                           | KKRR       |
| 63  | Jateng   | Kota Semarang       | 30,717,268,000 | 51,922,301,000  | 59.16                           | KKRR       |
| 64  | Jateng   | Kota Tegal          | 11,529,445,000 | 3,372,106,000   | 341.91                          | KKRST      |
| 65  | DIY      | Kota Yogyakarta     | 12,698,672,796 | 20,196,229,274  | 62.88                           | KKRR       |
| 66  | Jatim    | Kab. Bangkalan      | 6,046,162,459  | 2,577,816,608   | 234.55                          | KKRSD      |
| 67  | Jatim    | Kab. Banyuwangi     | 11,048,630,580 | 7,326,000,000   | 150.81                          | KKRSD      |
| 68  | Jatim    | Kab. Blitar         | 4,467,587,500  | 2,320,500,000   | 192.53                          | KKRSD      |
| 69  | Jatim    | Kab. Kediri         | 7,485,902,685  | 5,261,000,000   | 142.29                          | KKRSD      |
| 70  | Jatim    | Kab. Magetan        | 3,604,147,000  | 2,439,500,000   | 147.74                          | KKRSD      |
| 71  | Jatim    | Kab. Mojokerto      | 7,650,200,000  | 8,324,200,000   | 91.90                           | KKRR       |
| 72  | Jatim    | Kab. Pamekasan      | 4,851,286,400  | 1,755,500,000   | 276.35                          | KKRT       |
| 73  | Jatim    | Kab. Pasuruan       | 8,124,000,000  | 18,050,000,000  | 45.01                           | KKRR       |
| 74  | Jatim    | Kab. Sidoarjo       | 39,194,125,000 | 28,100,000,000  | 139.48                          | KKRSD      |
| 75  | Jatim    | Kota Kediri         | 3,043,858,900  | 3,097,000,000   | 98.28                           | KKRR       |
| 76  | Jatim    | Kota Malang         | 10,999,120,500 | 11,810,000,000  | 93.13                           | KKRR       |
| 77  | Jatim    | Kota Mojokerto      | 3,450,474,800  | 2,191,100,000   | 157.48                          | KKRSD      |
| 78  | Jatim    | Kota Probolinggo    | 7,290,666,800  | 2,834,930,000   | 257.17                          | KKRT       |
| 79  | Jatim    | Kota Surabaya       | 80,232,406,000 | 129,500,000,000 | 61.96                           | KKRR       |
| 80  | Bali     | Kab. Badung         | 3,364,000,000  | 220,625,000,000 | 1.52                            | KKRSR      |
| 81  | Bali     | Kab. Bangli         | 3,562,453,900  | 1,541,000,000   | 231.18                          | KKRSD      |
| 82  | Bali     | Kab. Buleleng       | 5,109,050,000  | 6,629,000,000   | 77.07                           | KKRR       |
| 83  | Bali     | Kab. Gianyar        | 14,346,160,000 | 40,046,670,000  | 35.82                           | KKRR       |
| 84  | Bali     | Kab. Jembrana       | 3,245,552,720  | 1,348,947,280   | 240.60                          | KKRSD      |
| 85  | Bali     | Kab. Tabanan        | 13,023,696,150 | 11,390,188,000  | 114.34                          | KKRSD      |
| 86  | Bali     | Kota Denpasar       | 26,137,000,000 | 60,350,000,000  | 43.31                           | KKRR       |
| 87  | Kalbar   | Kab. Kapuas Hulu    | 1,399,500,000  | 385,000,000     | 363.51                          | KKRST      |
| 88  | Kalbar   | Kab. Ketapang       | 2,418,427,000  | 1,107,041,000   | 218.46                          | KKRSD      |
| 89  | Kalbar   | Kab. Pontianak      | 948,149,000    | 2,651,074,000   | 35.76                           | KKRR       |
| 90  | Kalbar   | Kab. Sambas         | 2,722,645,500  | 1,084,000,000   | 251.17                          | KKRSD      |
| 91  | Kalbar   | Kab. Sanggau        | 2,053,626,250  | 1,607,219,087   | 127.78                          | KKRSD      |
| 92  | Kalteng  | Kab. Barito Selatan | 3,341,000,000  | 2,107,500,000   | 158.53                          | KKRSD      |
| 93  | Kalteng  | Kab. Barito Utara   | 1,330,148,000  | 637,980,000     | 208.49                          | KKRSD      |
| 94  | Kalteng  | Kab. Kapuas         | 1,489,500,000  | 1,158,538,000   | 128.57                          | KKRSD      |

| No. | Propinsi  | Kabupaten/Kota            | Retribusi         | Pajak             | Rasio<br>Retribusi<br>thd Pajak | Intensitas |
|-----|-----------|---------------------------|-------------------|-------------------|---------------------------------|------------|
| 95  | Kalsel    | Kab. Hulu Sungai Selatan  | 2,677,177,500     | 770,880,000       | 347.29                          | KKRST      |
| 96  | Kalsel    | Kab. Hulu Sungai Tengah   | 1,751,628,535     | 781,719,250       | 224.07                          | KKRSD      |
| 97  | Kalsel    | Kab. Hulu Sungai Utara    | 1,838,500,000     | 1,577,000,000     | 116.58                          | KKRSD      |
| 98  | Kalsel    | Kab. Tabalong             | 934,950,000       | 11,640,500,000    | 8.03                            | KKRSR      |
| 99  | Kalsel    | Kab. Tanah Laut           | 1,860,000,000     | 1,048,000,000     | 177.48                          | KKRSD      |
| 100 | Kalsel    | Kab. Tapin                | 348,500,000       | 729,700,000       | 47.76                           | KKRR       |
| 101 | Kaltim    | Kab. Berau                | 3,831,844,750     | 3,859,698,160     | 99.28                           | KKRR       |
| 102 | Kaltim    | Kab. Kutai                | 3,025,000,000,000 | 4,503,000,000,000 | 67.18                           | KKRR       |
| 103 | Kaltim    | Kab. Pasir                | 7,417,618,900     | 3,673,693,000     | 201.91                          | KKRSD      |
| 104 | Kaltim    | Kota Balikpapan           | 12,195,074,350    | 23,310,166,000    | 52.32                           | KKRR       |
| 105 | Kaltim    | Kota Samarinda            | 18,502,500,000    | 11,950,000,000    | 154.83                          | KKRSD      |
| 106 | Sulut     | Kab. Minahasa             | 4,958,108,120     | 2,763,378,000     | 179.42                          | KKRSD      |
| 107 | Sulut     | Kab. Sangihe Talaud       | 4,309,123,000     | 988,100,000       | 436.10                          | KKRST      |
| 108 | Sulut     | Kota Bitung               | 4,756,361,250     | 3,152,750,000     | 150.86                          | KKRSD      |
| 109 | Sulut     | Kota Manado               | 12,116,624,000    | 15,486,000,000    | 78.24                           | KKRR       |
| 110 | Gorontalo | Kab. Gorontalo            | 4,172,922,760     | 1,146,811,310     | 363.87                          | KKRST      |
| 111 | Gorontalo | Kota Gorontalo            | 5,137,000,000     | 1,381,900,000     | 371.73                          | KKRST      |
| 112 | Sulteng   | Kab. Banggai              | 2,686,400,000     | 2,032,000,000     | 132.20                          | KKRSD      |
| 113 | Sulteng   | Kab. Toli-Toli            | 717,958,086       | 678,932,000       | 105.75                          | KKRSD      |
| 114 | Sulteng   | Kab. Donggala             | 2,203,686,000     | 2,402,000,000     | 91.74                           | KKRR       |
| 115 | Sulteng   | Kab. Morowali             | 1,168,138,000     | 455,977,000       | 256.18                          | KKRT       |
| 116 | Sulteng   | Kab. Poso                 | 2,234,580,000     | 757,317,000       | 295.07                          | KKRT       |
| 117 | Sultra    | Kab. Buton                | 3,365,544,000     | 748,790,000       | 449.46                          | KKRST      |
| 118 | Sultra    | Kab. Kolaka               | 2,612,558,000     | 2,429,700,000     | 107.53                          | KKRSD      |
| 119 | Sulsel    | Kab. Luwu                 | 8,586,543,600     | 2,002,910,900     | 428.70                          | KKRST      |
| 120 | Sulsel    | Kab. Majene               | 780,570,000       | 414,660,000       | 188.24                          | KKRSD      |
| 121 | Sulsel    | Kab. Pangkap              | 2,936,375,000     | 11,380,075,000    | 25.80                           | KKRSR      |
| 122 | Sulsel    | Kab. Pinrang              | 2,870,292,000     | 1,948,648,000     | 147.30                          | KKRSD      |
| 123 | Sulsel    | Kab. Tana Toraja          | 5,999,418,000     | 3,936,064,000     | 152.42                          | KKRSD      |
| 124 | Sulsel    | Kota Pare-Pare            | 5,863,656,000     | 1,468,522,000     | 399.29                          | KKRST      |
| 125 | NTB       | Kab. Bima                 | 5,153,903,582     | 6,905,303,230     | 74.64                           | KKRR       |
| 126 | NTB       | Kab. Lombok Barat         | 4,287,966,000     | 13,605,000,000    | 31.52                           | KKRR       |
| 127 | NTB       | Kota Mataram              | 5,614,915,000     | 6,465,000,000     | 86.85                           | KKRR       |
| 128 | NTT       | Kab. Ende                 | 2,668,490,000     | 1,108,790,000     | 240.67                          | KKRSD      |
| 129 | NTT       | Kab. Flores Timur         | 1,526,254,298     | 599,972,000       | 254.39                          | KKRSD      |
| 130 | NTT       | Kab. Timor Tengah Selatan | 3,279,092,000     | 1,139,980,000     | 287.64                          | KKRT       |
| 131 | NTT       | Kab. Timor Tengah Utara   | 1,842,100,710     | 572,182,170       | 321.94                          | KKRT       |
| 132 | NTT       | Kota Kupang               | 2,686,855,000     | 4,271,000,000     | 62.91                           | KKRR       |
| 133 | Papua     | Kab. Fak-Fak              | 328,300,000       | 243,500,000       | 134.83                          | KKRSD      |
| 134 | Papua     | Kab. Manokwari            | 695,850,000       | 377,500,000       | 184.33                          | KKRSD      |

Berdasarkan APBD Kabupaten / Kota di Indonesia Tahun 2002

Rata-rata : 179.16  
Standev : 152.58

**Keterangan :**

**KKR** : Singkatan dari Kelembagaan - Keuangan Daerah - Rasio Retribusi/Pajak

Huruf setelah KKR : **ST** : Sangat Tinggi,

**T** : Tinggi

**SD** : Sedang

**R** : Rendah

**SR** : Sangat Rendah

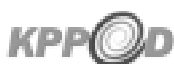



Lampiran 4.2.1.3.

Indikator Rasio Anggaran Pembangunan Terhadap APBD (Pendapatan)

| No. | Propinsi | Kabupaten/Kota             | Anggaran Pembangunan*) | Pendapatan (APBD)*) | Rasio Angg. Pemb. thd APBD | Intensitas |
|-----|----------|----------------------------|------------------------|---------------------|----------------------------|------------|
| 1   | Sumut    | Kab. Asahan                | 95,616,400,285         | 326,154,802,013     | 29.32                      | KKASD      |
| 2   | Sumut    | Kab. Dairi                 | 47,892,429,500         | 167,177,170,000     | 28.65                      | KKASD      |
| 3   | Sumut    | Kab. Deli Serdang          | 99,719,519,000         | 513,705,113,000     | 19.41                      | KKAR       |
| 4   | Sumut    | Kab. Langkat               | 84,495,009,893         | 327,160,144,000     | 25.83                      | KKASD      |
| 5   | Sumut    | Kab. Simalungun            | 114,871,994,000        | 367,084,038,000     | 31.29                      | KKASD      |
| 6   | Sumut    | Kota Binjai                | 54,467,014,000         | 155,047,170,000     | 35.13                      | KKASD      |
| 7   | Sumut    | Kota Medan                 | 138,852,893,000        | 663,506,522,000     | 20.93                      | KKAR       |
| 8   | Sumut    | Kota Pematang Siantar      | 45,643,523,000         | 165,943,997,000     | 27.51                      | KKASD      |
| 9   | Sumut    | Kota Sibolga               | 39,658,305,000         | 106,126,776,000     | 37.37                      | KKAT       |
| 10  | Sumut    | Kota Tanjung Balai         | 100,000,283,000        | 162,865,106,000     | 61.40                      | KKAST      |
| 11  | Sumut    | Kota Tebing Tinggi         | 26,272,441,000         | 80,170,544,000      | 32.77                      | KKASD      |
| 12  | Sumbar   | Kab. Pesisir Selatan       | 40,085,816,792         | 178,105,578,542     | 22.51                      | KKASD      |
| 13  | Sumbar   | Kab. Sawah Lunto Sijunjung | 65,808,635,285         | 204,528,609,657     | 32.18                      | KKASD      |
| 14  | Sumbar   | Kota Padang                | 47,985,242,027         | 338,909,245,593     | 14.16                      | KKASR      |
| 15  | Sumbar   | Kota Sawahlunto            | 23,506,734,500         | 86,875,849,184      | 27.06                      | KKASD      |
| 16  | Riau     | Kab. Bengkalis             | 1,028,503,345,721      | 1,433,679,947,844   | 71.74                      | KKAST      |
| 17  | Riau     | Kab. Indragiri Hilir       | 218,946,893,689        | 397,063,851,957     | 55.14                      | KKAST      |
| 18  | Riau     | Kab. Kampar                | 299,625,416,480        | 577,178,005,548     | 51.91                      | KKAST      |
| 19  | Riau     | Kota Batam                 | 181,279,198,300        | 358,633,724,010     | 50.55                      | KKAST      |
| 20  | Riau     | Kota Pekanbaru             | 115,505,767,952        | 364,020,424,452     | 31.73                      | KKASD      |
| 21  | Jambi    | Kab. Batanghari            | 72,263,290,068         | 159,076,309,514     | 45.43                      | KKAST      |
| 22  | Jambi    | Kab. Bungo                 | 128,669,926,270        | 168,526,547,462     | 76.35                      | KKAST      |
| 23  | Jambi    | Kab. Kerinci               | 57,204,699,375         | 199,292,749,717     | 28.70                      | KKASD      |
| 24  | Sumsel   | Kab. Muara Enim            | 112,200,385,166        | 362,514,953,476     | 30.95                      | KKASD      |
| 25  | Sumsel   | Kab. Musi Banyuasin        | 231,267,482,095        | 470,556,312,400     | 49.15                      | KKAST      |
| 26  | Sumsel   | Kab. Musi Rawas            | 139,475,375,050        | 312,078,363,235     | 44.69                      | KKAT       |
| 27  | Sumsel   | Kab. Ogan Kemiri Ilir      | 142,185,916,000        | 343,507,196,800     | 41.39                      | KKAT       |
| 28  | Sumsel   | Kota Palembang             | 100,792,358,885        | 453,648,765,000     | 22.22                      | KKASD      |
| 29  | Babel    | Kab. Bangka                | 99,714,283,900         | 244,583,079,000     | 40.77                      | KKAT       |
| 30  | Babel    | Kota Pangkal Pinang        | 33,188,191,000         | 109,099,473,000     | 30.42                      | KKASD      |
| 31  | Bengkulu | Kab. Bengkulu Selatan      | 34,148,968,000         | 217,478,914,801     | 15.70                      | KKAR       |
| 32  | Bengkulu | Kota Bengkulu              | 24,981,179,382         | 146,214,402,382     | 17.09                      | KKAR       |
| 33  | Lampung  | Kab. Lampung Barat         | 64,161,696,219         | 170,983,818,500     | 37.53                      | KKAT       |
| 34  | Lampung  | Kab. Lampung Selatan       | 52,811,955,000         | 309,537,036,929     | 17.06                      | KKAR       |
| 35  | Lampung  | Kab. Lampung Timur         | 23,977,007,000         | 250,029,940,000     | 9.59                       | KKASR      |
| 36  | Lampung  | Kota Bandar Lampung        | 41,207,275,000         | 279,253,893,211     | 14.76                      | KKAR       |
| 37  | Banten   | Kab. Lebak                 | 70,939,192,591         | 239,220,389,580     | 29.65                      | KKASD      |
| 38  | Banten   | Kab. Serang                | 60,647,274,000         | 346,371,894,261     | 17.51                      | KKAR       |
| 39  | Banten   | Kab. Tangerang             | 190,867,180,000        | 589,381,840,000     | 32.38                      | KKASD      |
| 40  | Banten   | Kota Tangerang             | 159,248,604,800        | 378,476,212,398     | 42.08                      | KKAT       |
| 41  | Jabar    | Kab. Bekasi                | 193,629,731,830        | 473,843,586,830     | 40.86                      | KKAT       |
| 42  | Jabar    | Kab. Bogor                 | 169,111,640,000        | 599,139,276,000     | 28.23                      | KKASD      |
| 43  | Jabar    | Kab. Ciamis                | 35,520,198,305         | 430,577,189,572     | 8.25                       | KKASR      |
| 44  | Jabar    | Kab. Cirebon               | 95,780,514,000         | 403,028,066,000     | 23.77                      | KKASD      |
| 45  | Jabar    | Kab. Garut                 | 50,661,487,716         | 475,273,298,244     | 10.66                      | KKASR      |
| 46  | Jabar    | Kab. Indramayu             | 104,083,972,400        | 366,695,891,000     | 28.38                      | KKASD      |
| 47  | Jabar    | Kab. Karawang              | 129,415,500,000        | 427,730,900,000     | 30.26                      | KKASD      |

| No. | Propinsi | Kabupaten/Kota      | Anggaran Pembangunan*) | Pendapatan (APBD)*) | Rasio Angg. Pemb. thd APBD | Intensitas |
|-----|----------|---------------------|------------------------|---------------------|----------------------------|------------|
| 48  | Jabar    | Kab. Kuningan       | 23,015,500,000         | 270,287,556,000     | 8.52                       | KKASR      |
| 49  | Jabar    | Kab. Sukabumi       | 117,637,944,000        | 395,179,535,000     | 29.77                      | KKASD      |
| 50  | Jabar    | Kab. Sumedang       | 33,867,464,178         | 322,011,698,253     | 10.52                      | KKASR      |
| 51  | Jabar    | Kab. Tasikmalaya    | 29,143,017,535         | 381,700,066,107     | 7.64                       | KKASR      |
| 52  | Jabar    | Kota Bekasi         | 161,113,100,939        | 396,131,547,411     | 40.67                      | KKAT       |
| 53  | Jabar    | Kota Bogor          | 59,118,108,000         | 245,507,291,000     | 24.08                      | KKASD      |
| 54  | Jabar    | Kota Cirebon        | 46,628,154,033         | 187,703,430,884     | 24.84                      | KKASD      |
| 55  | Jabar    | Kota Sukabumi       | 42,885,899,000         | 158,663,971,000     | 27.03                      | KKASD      |
| 56  | Jateng   | Kab. Kendal         | 13,989,603,175         | 383,589,093,800     | 3.65                       | KKASR      |
| 57  | Jateng   | Kab. Magelang       | 98,830,678,000         | 322,897,263,000     | 30.61                      | KKASD      |
| 58  | Jateng   | Kab. Pekalongan     | 51,876,962,000         | 551,161,119,000     | 9.41                       | KKASR      |
| 59  | Jateng   | Kab. Pemasang       | 40,962,662,000         | 285,549,404,000     | 14.35                      | KKASR      |
| 60  | Jateng   | Kab. Sukoharjo      | 29,759,883,000         | 251,570,464,000     | 11.83                      | KKASR      |
| 61  | Jateng   | Kab. Tegal          | 92,940,567,500         | 343,401,317,500     | 27.06                      | KKASD      |
| 62  | Jateng   | Kota Pekalongan     | 47,682,725,000         | 130,573,435,592     | 36.52                      | KKASD      |
| 63  | Jateng   | Kota Semarang       | 296,240,451,000        | 363,419,124,000     | 81.51                      | KKAST      |
| 64  | Jateng   | Kota Tegal          | 103,622,118,000        | 245,722,154,000     | 42.17                      | KKAT       |
| 65  | DIY      | Kota Yogyakarta     | 23,845,761,934         | 242,199,604,000     | 9.85                       | KKASR      |
| 66  | Jatim    | Kab. Bangkalan      | 49,237,917,000         | 228,664,373,067     | 21.53                      | KKAR       |
| 67  | Jatim    | Kab. Banyuwangi     | 77,119,539,400         | 387,867,205,135     | 19.88                      | KKAR       |
| 68  | Jatim    | Kab. Blitar         | 24,896,093,150         | 301,460,677,251     | 8.26                       | KKASR      |
| 69  | Jatim    | Kab. Kediri         | 55,490,549,850         | 322,726,219,685     | 17.19                      | KKAR       |
| 70  | Jatim    | Kab. Magetan        | 43,208,759,500         | 267,055,885,950     | 16.18                      | KKAR       |
| 71  | Jatim    | Kab. Mojokerto      | 62,281,000,000         | 296,638,819,000     | 21.00                      | KKAR       |
| 72  | Jatim    | Kab. Pamekasan      | 43,799,233,191         | 229,317,071,925     | 19.10                      | KKAR       |
| 73  | Jatim    | Kab. Pasuruan       | 150,049,931,740        | 565,664,971,678     | 26.53                      | KKASD      |
| 74  | Jatim    | Kab. Sidoarjo       | 104,209,127,270        | 438,787,626,770     | 23.75                      | KKASD      |
| 75  | Jatim    | Kota Kediri         | 29,552,900,285         | 147,529,415,804     | 20.03                      | KKAR       |
| 76  | Jatim    | Kota Malang         | 55,031,983,882         | 266,154,607,913     | 20.68                      | KKAR       |
| 77  | Jatim    | Kota Mojokerto      | 38,627,250,000         | 125,194,331,100     | 30.85                      | KKASD      |
| 78  | Jatim    | Kota Probolinggo    | 48,797,084,703         | 139,944,318,800     | 34.87                      | KKASD      |
| 79  | Jatim    | Kota Surabaya       | 208,952,865,000        | 931,794,480,000     | 22.42                      | KKASD      |
| 80  | Bali     | Kab. Badung         | 242,602,716,257        | 455,605,820,451     | 53.25                      | KKAST      |
| 81  | Bali     | Kab. Bangli         | 31,291,818,995         | 137,310,046,564     | 22.79                      | KKASD      |
| 82  | Bali     | Kab. Buleleng       | 40,098,926,410         | 261,099,675,410     | 15.36                      | KKAR       |
| 83  | Bali     | Kab. Gianyar        | 137,928,820,710        | 351,123,312,608     | 39.28                      | KKAT       |
| 84  | Bali     | Kab. Jembrana       | 20,431,006,952         | 159,962,798,252     | 12.77                      | KKASR      |
| 85  | Bali     | Kab. Tabanan        | 74,411,767,858         | 266,158,984,856     | 27.96                      | KKASD      |
| 86  | Bali     | Kota Denpasar       | 102,186,128,166        | 334,034,860,566     | 30.59                      | KKASD      |
| 87  | Kalbar   | Kab. Kapuas Hulu    | 83,978,392,898         | 209,460,634,898     | 40.09                      | KKAT       |
| 88  | Kalbar   | Kab. Ketapang       | 131,483,883,101        | 273,444,250,850     | 48.08                      | KKAST      |
| 89  | Kalbar   | Kab. Pontianak      | 47,442,888,300         | 226,245,697,000     | 20.97                      | KKAR       |
| 90  | Kalbar   | Kab. Sambas         | 69,169,161,800         | 215,057,377,732     | 32.16                      | KKASD      |
| 91  | Kalbar   | Kab. Sanggau        | 65,773,449,995         | 234,556,667,874     | 28.04                      | KKASD      |
| 92  | Kalteng  | Kab. Barito Selatan | 55,378,167,595         | 174,718,467,145     | 31.70                      | KKASD      |
| 93  | Kalteng  | Kab. Barito Utara   | 93,602,761,685         | 206,125,470,733     | 45.41                      | KKAST      |
| 94  | Kalteng  | Kab. Kapuas         | 116,605,297,000        | 329,484,672,000     | 35.39                      | KKASD      |

| No. | Propinsi  | Kabupaten/Kota            | Anggaran Pembangunan*) | Pendapatan (APBD)*) | Rasio Angg. Pemb. thd APBD | Intensitas |
|-----|-----------|---------------------------|------------------------|---------------------|----------------------------|------------|
| 95  | Kalsel    | Kab. Hulu Sungai Selatan  | 47,195,614,950         | 155,258,621,250     | 30.40                      | KKASD      |
| 96  | Kalsel    | Kab. Hulu Sungai Tengah   | 48,872,376,825         | 159,655,395,496     | 30.61                      | KKASD      |
| 97  | Kalsel    | Kab. Hulu Sungai Utara    | 42,147,220,000         | 164,411,799,000     | 25.64                      | KKASD      |
| 98  | Kalsel    | Kab. Tabalong             | 44,812,716,000         | 63,427,139,000      | 70.65                      | KKAST      |
| 99  | Kalsel    | Kab. Tanah Laut           | 47,138,364,000         | 157,337,062,080     | 29.96                      | KKASD      |
| 100 | Kalsel    | Kab. Tapin                | 23,808,109,200         | 108,175,650,867     | 22.01                      | KKAR       |
| 101 | Kaltim    | Kab. Berau                | 236,940,494,652        | 418,068,511,371     | 56.68                      | KKAST      |
| 102 | Kaltim    | Kab. Kutai                | 1,069,168,794,576      | 1,693,031,000,000   | 63.15                      | KKAST      |
| 103 | Kaltim    | Kab. Pasir                | 294,463,538,628        | 486,593,387,147     | 60.52                      | KKAST      |
| 104 | Kaltim    | Kota Balikpapan           | 219,577,705,531        | 422,969,072,044     | 51.91                      | KKAST      |
| 105 | Kaltim    | Kota Samarinda            | 273,170,007,643        | 551,231,097,696     | 49.56                      | KKAST      |
| 106 | Sulut     | Kab. Minahasa             | -                      | 342,174,429,850     | -                          | KKASR      |
| 107 | Sulut     | Kab. Sangihe Talaud       | 18,356,813,000         | 175,393,139,120     | 10.47                      | KKASR      |
| 108 | Sulut     | Kota Bitung               | 42,550,000,000         | 132,151,565,435     | 32.20                      | KKASD      |
| 109 | Sulut     | Kota Manado               | 31,530,000,000         | 194,930,924,000     | 16.17                      | KKAR       |
| 110 | Gorontalo | Kab. Gorontalo            | 44,036,830,500         | 207,252,408,645     | 21.25                      | KKAR       |
| 111 | Gorontalo | Kota Gorontalo            | 37,290,102,250         | 127,572,322,250     | 29.23                      | KKASD      |
| 112 | Sulteng   | Kab. Banggai              | 49,941,209,000         | 171,432,077,000     | 29.13                      | KKASD      |
| 113 | Sulteng   | Kab. Toli-Toli            | 43,836,213,750         | 109,273,146,941     | 40.12                      | KKAT       |
| 114 | Sulteng   | Kab. Donggala             | 250,000,000            | 297,672,989,000     | 0.08                       | KKASR      |
| 115 | Sulteng   | Kab. Morowali             | 63,610,776,180         | 146,169,697,003     | 43.52                      | KKAT       |
| 116 | Sulteng   | Kab. Poso                 | 76,575,986,057         | 238,173,643,345     | 32.15                      | KKASD      |
| 117 | Sultra    | Kab. Buton                | 52,064,780,933         | 210,505,007,533     | 24.73                      | KKASD      |
| 118 | Sultra    | Kab. Kolaka               | 48,399,998,000         | 147,525,186,000     | 32.81                      | KKASD      |
| 119 | Sultra    | Kab. Luwu                 | 58,463,291,800         | 208,410,036,419     | 28.05                      | KKASD      |
| 120 | Sulsel    | Kab. Majene               | 2,569,535,100          | 88,133,930,500      | 2.92                       | KKASR      |
| 121 | Sulsel    | Kab. Pangkajene           | 59,229,891,000         | 160,834,160,054     | 36.83                      | KKASD      |
| 122 | Sulsel    | Kab. Pinrang              | 45,352,434,000         | 165,612,587,000     | 27.38                      | KKASD      |
| 123 | Sulsel    | Kab. Tana Toraja          | 52,519,409,940         | 195,333,785,000     | 26.89                      | KKASD      |
| 124 | Sulsel    | Kota Pare-Pare            | 31,134,181,395         | 113,093,845,000     | 27.53                      | KKASD      |
| 125 | NTB       | Kab. Bima                 | 57,099,714,750         | 270,912,518,486     | 21.08                      | KKAR       |
| 126 | NTB       | Kab. Lombok Barat         | 42,865,528,302         | 245,094,725,830     | 17.49                      | KKAR       |
| 127 | NTB       | Kota Mataram              | 50,461,648,688         | 158,559,829,747     | 31.82                      | KKASD      |
| 128 | NTT       | Kab. Ende                 | 25,203,875,000         | 148,407,252,000     | 16.98                      | KKAR       |
| 129 | NTT       | Kab. Flores Timur         | 47,925,094,471         | 123,415,222,705     | 38.83                      | KKAT       |
| 130 | NTT       | Kab. Timor Tengah Selatan | 75,786,794,989         | 208,458,127,589     | 36.36                      | KKASD      |
| 131 | NTT       | Kab. Timor Tengah Utara   | 63,535,513,087         | 173,974,693,937     | 36.52                      | KKASD      |
| 132 | NTT       | Kota Kupang               | 19,645,000,000         | 132,898,455,000     | 14.78                      | KKAR       |
| 133 | Papua     | Kab. Fak-Fak              | 101,793,903,115        | 192,906,338,648     | 52.77                      | KKAST      |
| 134 | Papua     | Kab. Manokwari            | 122,924,932,871        | 274,852,848,130     | 44.72                      | KKAT       |

Berdasarkan RAPBD Kabupaten / Kota di Indonesia Tahun 2002

Rata-rata : 29.93

Standev : 15.31

**Keterangan :**

**KKA** : Singkatan dari Kelembagaan - Keuangan Daerah - Rasio Anggaran Pembangunan/APBD

Huruf setelah KKA : **ST** : Sangat Tinggi,

**T** : Tinggi

**SD** : Sedang

**R** : Rendah

**SR** : Sangat Rendah



Lampiran 4.2.2. Hasil Klasifikasi Indikator Faktor Ekonomi Daerah

Lampiran 4.2.2.1. Variabel Potensi Ekonomi

Lampiran 4.2.2.1.1. Indikator PDRB Perkapita

| No. | Propinsi | Kabupaten/Kota          | PDRB          | Jumlah Penduduk | PDRB Perkapita Non Migas (Rp) | Intensitas |
|-----|----------|-------------------------|---------------|-----------------|-------------------------------|------------|
| 1   | Sumut    | Kab. Asahan             | 8,208,613.19  | 933,541         | 8,792,986.26                  | EPPST      |
| 2   | Sumut    | Kab. Dairi              | 1,339,871.67  | 306,676         | 4,369,013.78                  | EPPSD      |
| 3   | Sumut    | Kab. Deli Serdang       | 7,145,449.41  | 1,944,055       | 3,675,538.71                  | EPPSD      |
| 4   | Sumut    | Kab. Langkat            | 4,708,987.35  | 889,739         | 4,427,187.00                  | EPPSD      |
| 5   | Sumut    | Kab. Simalungun         | 3,559,415.26  | 853,890         | 4,168,470.48                  | EPPSD      |
| 6   | Sumut    | Kota Binjai             | 833,170.21    | 212,098         | 3,928,232.28                  | EPPSD      |
| 7   | Sumut    | Kota Medan              | 11,889,968.93 | 1,893,686       | 6,278,743.64                  | EPPST      |
| 8   | Sumut    | Kota Pematang Siantar   | 1,694,192.87  | 240,110         | 7,055,903.00                  | EPPST      |
| 9   | Sumut    | Kota Sibolga            | 480,452.32    | 81,377          | 5,904,030.87                  | EPPT       |
| 10  | Sumut    | Kota Tanjung Balai      | 833,070.23    | 131,159         | 6,351,605.53                  | EPPST      |
| 11  | Sumut    | Kota Tebing Tinggi      | 728,827.99    | 124,814         | 5,839,312.82                  | EPPT       |
| 12  | Sumbar   | Kab. Pesisir Selatan    | 1,309,537.11  | 388,153         | 3,373,765.27                  | EPPSD      |
| 13  | Sumbar   | Kab. Sijunjung          | 1,453,030.92  | 306,817         | 4,735,822.72                  | EPPSD      |
| 14  | Sumbar   | Kota Padang             | 7,093,164.89  | 708,369         | 10,013,375.64                 | EPPST      |
| 15  | Sumbar   | Kota Sawah Lunto        | 479,064.32    | 48,616          | 9,854,046.40                  | EPPST      |
| 16  | Riau     | Kab. Bengkalis          | 1,620,441.18  | 518,947         | 3,122,556.21                  | EPPSD      |
| 17  | Riau     | Kab. Indragiri Hilir    | 2,358,050.92  | 553,327         | 4,261,586.58                  | EPPSD      |
| 18  | Riau     | Kab. Kampar             | 1,289,220.97  | 849,648         | 1,517,358.92                  | EPPSR      |
| 19  | Riau     | Kota Batam              | 6,571,884.08  | 417,644         | 15,735,612.34                 | EPPST      |
| 20  | Riau     | Kota Pekanbaru          | 3,202,360.81  | 575,277         | 5,566,641.48                  | EPPT       |
| 21  | Jambi    | Kab. Batanghari         | 677,378.00    | 421,912         | 1,458,821.60                  | EPPSR      |
| 22  | Jambi    | Kab. Bungo              | 682,655.23    | 437,600         | 1,559,998.24                  | EPPSR      |
| 23  | Jambi    | Kab. Kerinci            | 989,301.63    | 292,817         | 3,378,566.24                  | EPPSD      |
| 24  | Sumsel   | Kab. Muara Enim         | 8,658,663.00  | 712,914         | 4,619,885.43                  | EPPSD      |
| 25  | Sumsel   | Kab. Musi Banyu Asin    | 8,607,969.00  | 1,220,306       | 3,563,589.79                  | EPPSD      |
| 26  | Sumsel   | Kab. Musi Rawas         | 2,532,846.00  | 632,923         | 2,702,365.06                  | EPPR       |
| 27  | Sumsel   | Kab. Ogan Komering Ilir | 2,916,600.00  | 961,346         | 3,033,871.26                  | EPPSD      |
| 28  | Sumsel   | Kota Palembang          | 9,487,060.00  | 1,430,600       | 5,692,508.74                  | EPPT       |
| 29  | Babel    | Kab. Bangka             | 3,577,823.00  | 616,298         | 5,805,345.79                  | EPPT       |
| 30  | Babel    | Kota Pangkal Pinang     | 590,690.00    | 124,997         | 4,725,633.42                  | EPPSD      |
| 31  | Bengkulu | Kab. Bengkulu Selatan   | 598,982.00    | 358,384         | 1,671,341.35                  | EPPSR      |
| 32  | Bengkulu | Kota Bengkulu           | 1,096,644.00  | 229,252         | 4,783,574.41                  | EPPSD      |
| 33  | Lampung  | Kab. Lampung Barat      | 1,040,445.00  | 365,745         | 2,844,727.88                  | EPPR       |
| 34  | Lampung  | Kab. Lampung Selatan    | 3,381,561.00  | 1,130,246       | 2,991,880.53                  | EPPR       |
| 35  | Lampung  | Kab. Lampung Timur      | 2,970,870.00  | 2,339,482       | 1,128,595.56                  | EPPSR      |
| 36  | Lampung  | Kota Bandar Lampung     | 4,821,885.00  | 728,082         | 6,622,722.44                  | EPPST      |
| 37  | Banten   | Kab. Lebak              | 2,720,803.54  | 1,021,577       | 2,663,336.72                  | EPPR       |
| 38  | Banten   | Kab. Serang             | 6,541,283.00  | 1,909,644       | 3,425,393.95                  | EPPSD      |
| 39  | Banten   | Kab. Tangerang          | 12,196,830.13 | 2,736,224       | 4,457,540.80                  | EPPSD      |
| 40  | Banten   | Kota Tangerang          | 16,205,997.00 | 1,294,728       | 12,516,912.43                 | EPPST      |
| 41  | Jabar    | Kab. Bekasi             | 30,267,209.08 | 1,620,499       | 18,677,709.20                 | EPPST      |
| 42  | Jabar    | Kab. Bogor              | 10,597,758.71 | 4,599,953       | 2,303,884.13                  | EPPR       |
| 43  | Jabar    | Kab. Ciamis             | 5,221,635.49  | 1,595,062       | 3,273,625.41                  | EPPSD      |
| 44  | Jabar    | Kab. Cirebon            | 4,159,344.77  | 1,901,642       | 2,187,238.59                  | EPPR       |
| 45  | Jabar    | Kab. Garut              | 5,847,651.01  | 2,031,730       | 2,878,163.44                  | EPPR       |
| 46  | Jabar    | Kab. Indramayu          | 14,013,994.67 | 1,581,149       | 8,863,171.45                  | EPPST      |
| 47  | Jabar    | Kab. Karawang           | 7,314,928.57  | 1,755,111       | 4,167,786.86                  | EPPSD      |



| No. | Propinsi | Kabupaten/Kota      | PDRB          | Jumlah Penduduk | PDRB Perkapita Non Migas (Rp) | Intensitas |
|-----|----------|---------------------|---------------|-----------------|-------------------------------|------------|
| 48  | Jabar    | Kab. Kuningan       | 2,130,450.39  | 977,519         | 2,179,446.53                  | EPPR       |
| 49  | Jabar    | Kab. Sukabumi       | 5,641,693.50  | 2,052,419       | 2,544,731.38                  | EPPR       |
| 50  | Jabar    | Kab. Sumedang       | 2,640,519.01  | 962,180         | 2,744,308.77                  | EPPR       |
| 51  | Jabar    | Kab. Tasik          | 5,544,558.70  | 2,041,236       | 2,716,275.19                  | EPPR       |
| 52  | Jabar    | Kota Bekasi         | 8,875,599.00  | 1,610,435       | 5,511,305.33                  | EPPT       |
| 53  | Jabar    | Kota Bogor          | 2,671,607.44  | 738,824         | 3,616,026.88                  | EPPSD      |
| 54  | Jabar    | Kota Cirebon        | 3,746,033.19  | 268,437         | 13,954,980.83                 | EPPST      |
| 55  | Jabar    | Kota Sukabumi       | 1,037,686.25  | 251,132         | 4,132,035.14                  | EPPSD      |
| 56  | Jateng   | Kab. Kendal         | 3,778,070.06  | 845,370         | 4,469,131.93                  | EPPSD      |
| 57  | Jateng   | Kab. Magelang       | 2,712,534.28  | 1,092,776       | 2,482,241.81                  | EPPR       |
| 58  | Jateng   | Kab. Pekalongan     | 2,412,445.68  | 795,044         | 3,034,354.93                  | EPPSD      |
| 59  | Jateng   | Kab. Pemalang       | 2,311,842.94  | 1,253,706       | 1,844,007.24                  | EPPSR      |
| 60  | Jateng   | Kab. Sukoharjo      | 2,514,899.89  | 768,752         | 3,271,405.98                  | EPPSD      |
| 61  | Jateng   | Kab. Tegal          | 2,043,454.67  | 1,374,382       | 1,486,817.11                  | EPPSR      |
| 62  | Jateng   | Kota Pekalongan     | 1,277,963.47  | 260,814         | 4,899,903.65                  | EPPSD      |
| 63  | Jateng   | Kota Semarang       | 12,886,561.76 | 1,341,730       | 9,604,437.37                  | EPPST      |
| 64  | Jateng   | Kota Tegal          | 798,921.08    | 236,038         | 3,384,713.82                  | EPPSD      |
| 65  | DIY      | Kota Yogyakarta     | 3,189,020.00  | 396,241         | 8,048,182.80                  | EPPST      |
| 66  | Jatim    | Kab. Bangkalan      | 1,820,799.49  | 795,888         | 2,287,758.44                  | EPPR       |
| 67  | Jatim    | Kab. Banyuwangi     | 4,486,130.29  | 1,469,534       | 3,052,757.06                  | EPPSD      |
| 68  | Jatim    | Kab. Blitar         | 2,470,557.80  | 1,055,666       | 2,340,283.57                  | EPPR       |
| 69  | Jatim    | Kab. Kediri         | 3,241,779.15  | 1,397,543       | 2,319,627.48                  | EPPR       |
| 70  | Jatim    | Kab. Magetan        | 1,606,926.91  | 612,181         | 2,624,921.24                  | EPPR       |
| 71  | Jatim    | Kab. Mojokerto      | 2,833,603.47  | 900,112         | 3,148,056.54                  | EPPSD      |
| 72  | Jatim    | Kab. Pamekasan      | 1,126,568.72  | 686,788         | 1,640,344.21                  | EPPSR      |
| 73  | Jatim    | Kab. Pasuruan       | 3,459,611.55  | 1,347,987       | 2,566,502.16                  | EPPR       |
| 74  | Jatim    | Kab. Sidoarjo       | 10,707,549.52 | 1,535,173       | 6,974,816.21                  | EPPST      |
| 75  | Jatim    | Kota Kediri         | 13,319,154.52 | 242,474         | 54,930,237.96                 | EPPST      |
| 76  | Jatim    | Kota Malang         | 6,597,371.65  | 748,031         | 8,819,650.05                  | EPPST      |
| 77  | Jatim    | Kota Mojokerto      | 541,535.47    | 108,855         | 4,974,833.22                  | EPPSD      |
| 78  | Jatim    | Kota Probolinggo    | 1,050,806.06  | 192,050         | 5,471,523.35                  | EPPT       |
| 79  | Jatim    | Kota Surabaya       | 41,100,326.05 | 2,585,508       | 15,896,421.92                 | EPPST      |
| 80  | Bali     | Kab. Badung         | 3,433,683.38  | 339,326         | 10,119,128.45                 | EPPST      |
| 81  | Bali     | Kab. Bangli         | 724,022.46    | 192,502         | 3,761,116.56                  | EPPSD      |
| 82  | Bali     | Kab. Buleleng       | 2,018,264.47  | 555,099         | 3,635,864.00                  | EPPSD      |
| 83  | Bali     | Kab. Gianyar        | 2,005,497.33  | 390,726         | 5,132,746.04                  | EPPT       |
| 84  | Bali     | Kab. Jembrana       | 1,115,167.29  | 231,572         | 4,815,639.59                  | EPPSD      |
| 85  | Bali     | Kab. Tabanan        | 1,465,138.51  | 373,863         | 3,918,918.19                  | EPPSD      |
| 86  | Bali     | Kota Denpasar       | 3,181,884.46  | 515,263         | 6,175,262.85                  | EPPST      |
| 87  | Kalbar   | Kab. Kapuas Hulu    | 635,009.17    | 181,989         | 3,489,272.26                  | EPPSD      |
| 88  | Kalbar   | Kab. Ketapang       | 1,305,104.07  | 421,350         | 3,097,434.60                  | EPPSD      |
| 89  | Kalbar   | Kab. Pontianak      | 4,047,346.45  | 905,732         | 4,468,591.65                  | EPPSD      |
| 90  | Kalbar   | Kab. Sambas         | 1,719,606.18  | 785,512         | 2,189,153.29                  | EPPR       |
| 91  | Kalbar   | Kab. Sanggau        | 2,013,665.86  | 499,648         | 4,030,168.96                  | EPPSD      |
| 92  | Kalteng  | Kab. Barito Selatan | 971,466.24    | 179,106         | 5,423,973.74                  | EPPT       |
| 93  | Kalteng  | Kab. Barito Utara   | 1,449,482.25  | 181,647         | 7,979,665.23                  | EPPST      |
| 94  | Kalteng  | Kab. Kapuas         | 2,140,340.16  | 509,480         | 4,201,028.81                  | EPPSD      |

| No. | Propinsi  | Kabupaten/Kota            | PDRB          | Jumlah Penduduk | PDRB Perkapita Non Migas (Rp) | Intensitas |
|-----|-----------|---------------------------|---------------|-----------------|-------------------------------|------------|
| 95  | Kalsel    | Kab. Hulu Sungai Selatan  | 707,251.44    | 193,608         | 3,653,007.33                  | EPPSD      |
| 96  | Kalsel    | Kab. Hulu Sungai Utara    | 1,550,349.40  | 223,136         | 6,759,746.64                  | EPPST      |
| 97  | Kalsel    | Kab. Hulu Sungai Tengah   | 614,327.22    | 288,748         | 2,127,554.91                  | EPPR       |
| 98  | Kalsel    | Kab. Tabalong             | 1,438,929.31  | 169,797         | 5,692,240.92                  | EPPT       |
| 99  | Kalsel    | Kab. Tanah Laut           | 1,220,755.01  | 227,404         | 5,368,221.38                  | EPPT       |
| 100 | Kalsel    | Kab. Tapin                | 611,031.28    | 140,550         | 4,347,429.98                  | EPPSD      |
| 101 | Kaltim    | Kab. Berau                | 2,188,702.78  | 114,923         | 19,044,949.92                 | EPPST      |
| 102 | Kaltim    | Kab. Kutai                | 18,379,996.38 | 799,993         | 5,950,151.31                  | EPPT       |
| 103 | Kaltim    | Kab. Pasir                | 1,927,945.24  | 265,685         | 7,256,507.65                  | EPPST      |
| 104 | Kaltim    | Kota Balikpapan           | 8,550,645.57  | 404,863         | 11,623,447.23                 | EPPST      |
| 105 | Kaltim    | Kota Samarinda            | 5,807,534.20  | 517,714         | 11,217,649.51                 | EPPST      |
| 106 | Sulut     | Kab. Minahasa             | 3,255,258.70  | 765,859         | 4,250,467.38                  | EPPSD      |
| 107 | Sulut     | Kab. Sangietailaut        | 834,193.00    | 265,391         | 3,143,260.32                  | EPPSD      |
| 108 | Sulut     | Kota Bitung               | 825,515.00    | 145,848         | 5,660,105.04                  | EPPT       |
| 109 | Sulut     | Kota Manado               | 2,099,657.00  | 369,723         | 5,679,000.22                  | EPPT       |
| 110 | Gorontalo | Kab. Gorontalo            | 988,476.00    | 701,27          | 1,409,545.21                  | EPPSR      |
| 111 | Gorontalo | Kota Gorontalo            | 358,520.98    | 134,447         | 2,666,634.30                  | EPPR       |
| 112 | Sulteng   | Kab. Banggai              | 901,544.83    | 407,928         | 2,210,058.72                  | EPPR       |
| 113 | Sulteng   | Kab. Tolitoli             | 614,642.41    | 269,415         | 2,281,396.39                  | EPPR       |
| 114 | Sulteng   | Kab. Donggala 1999        | -             | 721,306         | 2,330,290.65                  | EPPR       |
| 115 | Sulteng   | Kab. Morowali             | 708,749.94    | 158,477         | 4,472,257.43                  | EPPSD      |
| 116 | Sulteng   | Kab. Poso 1999            | -             | 388,834         | 2,085,559.35                  | EPPSR      |
| 117 | Sultra    | Kab. Buton                | 1,126,231.51  | 528,299         | 2,131,807.01                  | EPPR       |
| 118 | Sultra    | Kab. Kolaka               | 1,881,655.81  | 318,343         | 5,910,781.17                  | EPPT       |
| 119 | Sulsel    | Kab. Luwu                 | 910,851.65    | 826,185         | 1,102,479.05                  | EPPSR      |
| 120 | Sulsel    | Kab. Majene               | 362,475.31    | 119,992         | 3,020,828.97                  | EPPSD      |
| 121 | Sulsel    | Kab. Pangkajene Kepulauan | 1,261,372.62  | 263,204         | 4,792,376.33                  | EPPSD      |
| 122 | Sulsel    | Kab. Pinrang              | 1,306,911.13  | 309,489         | 4,222,803.17                  | EPPSD      |
| 123 | Sulsel    | Kab. Tana Toraja          | 803,966.60    | 390,897         | 2,056,722.36                  | EPPSR      |
| 124 | Sulsel    | Kota Parepare             | 399,672.40    | 107,783         | 3,708,120.95                  | EPPSD      |
| 125 | NTB       | Kab. Bima                 | 1,245,933.76  | 503,003         | 2,476,990.70                  | EPPR       |
| 126 | NTB       | Kab. Lombok Barat         | 1,524,247.86  | 660,371         | 2,308,168.99                  | EPPR       |
| 127 | NTB       | Kota Mataram              | 977,284.97    | 313,538         | 3,116,958.61                  | EPPSD      |
| 128 | NTT       | Kab. Ende                 | 395,421.85    | 230,861         | 1,712,813.55                  | EPPSR      |
| 129 | NTT       | Kab. Flores Timur         | 229,625.82    | 286,573         | 801,282.10                    | EPPSR      |
| 130 | NTT       | Kab. Timor Tengah Selatan | 497,682.34    | 386,346         | 1,288,177.81                  | EPPSR      |
| 131 | NTT       | Kab. Timor Tengah Utara   | 259,775.64    | 202,227         | 1,284,574.48                  | EPPSR      |
| 132 | NTT       | Kota Kupang               | 1,117,409.13  | 233,342         | 4,788,718.40                  | EPPSD      |
| 133 | Papua     | Kab. Fakfak               | 353,189.44    | 143,592         | 2,459,673.52                  | EPPR       |
| 134 | Papua     | Kab. Manokwari            | 784,889.79    | 179,142         | 4,381,383.43                  | EPPSD      |

Sumber : PDRB Perkapita Daerah Kabupaten / Kota di Indonesia Th.2000, BPS

Rata-rata : 5,263,892.11  
Standev : 5,654,180.40

**Keterangan :**

**EPP** : Singkatan dari Ekonomi Daerah - Potensi Ekonomi - PDRB Perkapita

Huruf setelah EPP : **ST** : Sangat Tinggi,

**T** : Tinggi

**SD** : Sedang

**R** : Rendah

**SR** : Sangat Rendah



Lampiran 4.2.2.1.2.

Indikator Pertumbuhan PDRB atas Harga Konstan Tahun 1996 - 20000

| No. | Propinsi | Kabupaten/Kota             | 1996  | 1997  | 1998   | 1999  | 2000   | Rata-rata<br>Pertumbuhan<br>PRDB 1996 - 2000 | Intensitas |
|-----|----------|----------------------------|-------|-------|--------|-------|--------|----------------------------------------------|------------|
| 1   | Sumut    | Kab. Asahan                | 10.29 | 8.81  | 1.05   | 5.29  | 6.54   | 6.40                                         | EPGST      |
| 2   | Sumut    | Kab. Dairi                 | 10.85 | 6.61  | 2.45   | 0.30  | 7.58   | 5.56                                         | EPGST      |
| 3   | Sumut    | Kab. Deli Serdang          | 6.55  | 9.49  | -8.90  | 3.98  | 5.33   | 3.29                                         | EPGSD      |
| 4   | Sumut    | Kab. Langkat 1)            | 7.59  | 4.75  | 0.17   | 1.46  | 3.59   | 3.51                                         | EPGSD      |
| 5   | Sumut    | Kab. Simalungun            | 6.52  | 4.90  | -2.76  | 4.85  | 3.95   | 3.49                                         | EPGSD      |
| 6   | Sumut    | Kota Binjai                | 9.82  | 2.59  | -12.76 | 4.44  | 6.80   | 2.18                                         | EPGR       |
| 7   | Sumut    | Kota Medan                 | 9.75  | 7.73  | -18.11 | 3.43  | 4.95   | 1.55                                         | EPGSR      |
| 8   | Sumut    | Kota Pematang Siantar      | 5.22  | 6.15  | -4.71  | 4.26  | 4.72   | 3.13                                         | EPGSD      |
| 9   | Sumut    | Kota Sibolga               | 18.30 | 5.96  | -8.37  | 5.19  | 4.82   | 5.18                                         | EPGST      |
| 10  | Sumut    | Kota Tanjung Balai         | 9.76  | 7.52  | -7.45  | 2.57  | 3.72   | 3.22                                         | EPGSD      |
| 11  | Sumut    | Kota Tebing Tinggi         | 7.02  | 3.86  | -15.54 | 3.12  | 2.75   | 0.24                                         | EPGSR      |
| 12  | Sumbar   | Kab. Pesisir Selatan       | 7.12  | 4.23  | -4.81  | 1.23  | 2.30   | 2.01                                         | EPGR       |
| 13  | Sumbar   | Kab. Sawahlunto /Sijunjung | 7.52  | 4.82  | -3.38  | 1.31  | 3.66   | 2.79                                         | EPGSD      |
| 14  | Sumbar   | Kota Padang                | 9.12  | 6.48  | -7.70  | 1.71  | 4.51   | 2.82                                         | EPGSD      |
| 15  | Sumbar   | Kota Sawahlunto            | -4.93 | 2.06  | -4.36  | -5.91 | -6.19  | -3.87                                        | EPGSR      |
| 16  | Riau     | Kab. Bengkalis 1)          | 7.92  | 5.07  | 1.75   | 4.06  | 4.78   | 4.72                                         | EPGT       |
| 17  | Riau     | Kab. Indragiri Hilir       | 7.28  | 5.43  | 0.19   | 4.58  | 2.89   | 4.07                                         | EPGT       |
| 18  | Riau     | Kab. Kampar 1)             | 7.68  | 6.17  | -2.05  | 3.60  | -48.78 | -6.68                                        | EPGSR      |
| 19  | Riau     | Kota Batam                 | 16.85 | 14.76 | 3.08   | 6.38  | 7.72   | 9.76                                         | EPGST      |
| 20  | Riau     | Kota Pekanbaru             | 9.56  | 13.32 | -2.48  | -1.65 | 7.75   | 5.30                                         | EPGST      |
| 21  | Jambi    | Kab. Batanghari 1)         | 7.96  | 4.30  | -5.97  | 1.92  | -41.52 | -6.66                                        | EPGSR      |
| 22  | Jambi    | Kab. Bungo Tebo            | 8.83  | 4.18  | -7.02  | 2.19  | -38.39 | -6.04                                        | EPGSR      |
| 23  | Jambi    | Kab. Kerinci               | 8.20  | 3.02  | -5.39  | 3.03  | 2.86   | 2.34                                         | EPGR       |
| 24  | Sumsel   | Kab. Muara Enim 1)         | 10.68 | 4.67  | -2.28  | 2.82  | 0.44   | 3.27                                         | EPGSD      |
| 25  | Sumsel   | Kab. Musi Banyuasin 1)     | 8.71  | 3.96  | -6.56  | 1.84  | 3.72   | 2.33                                         | EPGR       |
| 26  | Sumsel   | Kab. Musi Rawas 1)         | 8.95  | 10.06 | -9.53  | 2.88  | 3.60   | 3.19                                         | EPGSD      |
| 27  | Sumsel   | Kab. Ogan Komering Ilir    | 10.10 | 5.08  | -2.36  | -0.40 | 3.16   | 3.12                                         | EPGSD      |
| 28  | Sumsel   | Kota Palembang 1)          | 8.99  | 6.46  | -12.51 | 2.97  | 5.23   | 2.23                                         | EPGR       |
| 29  | Babel    | Kab. Bangka                | 12.56 | 7.05  | -5.55  | 0.60  | 8.70   | 4.67                                         | EPGT       |
| 30  | Babel    | Kota Pangkal Pinang        | 8.03  | 7.54  | -2.54  | 1.64  | 4.80   | 3.89                                         | EPGT       |
| 31  | Bengkulu | Kab. Bengkulu Selatan      | 3.05  | 2.20  | -2.19  | 1.63  | 0.47   | 1.03                                         | EPGSR      |
| 32  | Bengkulu | Kota Bengkulu              | 8.12  | 4.85  | -3.36  | 3.97  | 5.54   | 3.82                                         | EPGT       |
| 33  | Lampung  | Kab. Lampung Barat         | 9.24  | -1.49 | 4.26   | 6.95  | 5.56   | 4.90                                         | EPGST      |
| 34  | Lampung  | Kab. Lampung Selatan       | 5.52  | 2.05  | -7.40  | 3.41  | 3.84   | 1.48                                         | EPGSR      |
| 35  | Lampung  | Kab. Lampung Timur         | 0.00  | 0.00  | 0.00   | 2.75  | 16.29  | 3.81                                         | EPGT       |
| 36  | Lampung  | Kota Bandar Lampung        | 9.26  | 8.49  | -15.10 | 3.02  | 3.64   | 1.86                                         | EPGR       |
| 37  | Banten   | Kab. Lebak                 | 8.88  | 2.29  | -9.90  | 2.54  | 10.73  | 2.91                                         | EPGSD      |
| 38  | Banten   | Kab. Serang                | 8.79  | 4.32  | -14.42 | 0.80  | -47.15 | -9.53                                        | EPGSR      |
| 39  | Banten   | Kab. Tangerang             | 10.65 | 5.95  | -9.26  | 2.11  | 4.39   | 2.77                                         | EPGSD      |
| 40  | Banten   | Kota Tangerang             | 17.59 | 11.06 | -16.76 | 2.62  | 3.95   | 3.69                                         | EPGSD      |
| 41  | Jabar    | Kab. Bekasi                | 5.07  | 6.93  | -21.36 | 1.76  | 68.86  | 12.25                                        | EPGST      |
| 42  | Jabar    | Kab. Bogor                 | 11.70 | 4.77  | -20.72 | 1.59  | -21.07 | -4.75                                        | EPGSR      |
| 43  | Jabar    | Kab. Ciamis                | 6.79  | 3.69  | -8.83  | 2.37  | 2.65   | 1.33                                         | EPGSR      |
| 44  | Jabar    | Kab. Cirebon               | 7.40  | 3.37  | -20.77 | 3.61  | 5.05   | -0.27                                        | EPGSR      |
| 45  | Jabar    | Kab. Garut                 | 6.81  | 3.03  | -11.64 | 2.52  | 3.89   | 0.92                                         | EPGSR      |
| 46  | Jabar    | Kab. Indramayu 1)          | 6.95  | 1.94  | -10.49 | 5.53  | 4.11   | 1.61                                         | EPGSR      |
| 47  | Jabar    | Kab. Karawang              | 9.11  | 4.52  | -19.79 | 5.62  | 12.76  | 2.44                                         | EPGR       |

| No. | Propinsi | Kabupaten/Kota      | 1996  | 1997  | 1998   | 1999   | 2000  | Rata-rata<br>Pertumbuhan<br>PRDB 1996 - 2000 | Intensitas |
|-----|----------|---------------------|-------|-------|--------|--------|-------|----------------------------------------------|------------|
| 48  | Jabar    | Kab. Kuningan       | 7.01  | 3.46  | -5.66  | 1.27   | 2.80  | 1.78                                         | EPGR       |
| 49  | Jabar    | Kab. Sukabumi       | 8.67  | 3.20  | -10.82 | 1.64   | 12.51 | 3.04                                         | EPGSD      |
| 50  | Jabar    | Kab. Sumedang       | 7.52  | 2.88  | -11.79 | 2.39   | 3.90  | 0.98                                         | EPGSR      |
| 51  | Jabar    | Kab. Tasikmalaya    | 7.64  | 3.62  | -13.21 | 2.27   | 11.38 | 2.34                                         | EPGR       |
| 52  | Jabar    | Kota Bekasi         | 0.00  | 5.70  | -20.66 | 2.63   | 6.95  | -1.08                                        | EPGSR      |
| 53  | Jabar    | Kota Bogor          | 11.20 | 5.09  | -16.65 | 3.28   | 21.16 | 4.82                                         | EPGST      |
| 54  | Jabar    | Kota Cirebon        | 61.66 | 6.64  | -5.36  | 2.29   | 9.12  | 14.87                                        | EPGST      |
| 55  | Jabar    | Kota Sukabumi       | 7.27  | 3.86  | -17.15 | 3.20   | 4.82  | 0.40                                         | EPGSR      |
| 56  | Jateng   | Kab. Kendal         | 6.40  | 4.32  | -9.30  | 2.17   | 2.00  | 1.12                                         | EPGSR      |
| 57  | Jateng   | Kab. Magelang       | 6.53  | 1.17  | -3.14  | 1.64   | 3.50  | 1.94                                         | EPGR       |
| 58  | Jateng   | Kab. Pekalongan     | 6.84  | 3.88  | -8.66  | 3.51   | 2.52  | 1.62                                         | EPGSR      |
| 59  | Jateng   | Kab. Pemalang       | 6.98  | 4.74  | -1.63  | 1.59   | 3.71  | 3.08                                         | EPGSD      |
| 60  | Jateng   | Kab. Sukoharjo      | 9.50  | 2.78  | -11.23 | 1.25   | 3.52  | 1.16                                         | EPGSR      |
| 61  | Jateng   | Kab. Tegal          | 6.54  | 5.45  | -9.02  | 2.53   | 4.90  | 2.08                                         | EPGR       |
| 62  | Jateng   | Kota Pekalongan     | 7.59  | 3.32  | -8.13  | 3.96   | 3.99  | 2.15                                         | EPGR       |
| 63  | Jateng   | Kota Semarang       | 12.77 | 9.73  | -18.23 | 3.41   | 4.97  | 2.53                                         | EPGSD      |
| 64  | Jateng   | Kota Tegal          | 8.28  | 3.59  | -6.12  | 3.73   | 5.11  | 2.92                                         | EPGSD      |
| 65  | DIY      | Kota Yogyakarta     | 9.11  | 4.76  | -11.11 | 1.03   | 3.60  | 1.48                                         | EPGSR      |
| 66  | Jatim    | Kab. Bangkalan      | 6.46  | 4.59  | -0.17  | 3.02   | 3.24  | 3.43                                         | EPGSD      |
| 67  | Jatim    | Kab. Banyuwangi     | 5.99  | 6.49  | -6.11  | 1.72   | 6.58  | 2.93                                         | EPGSD      |
| 68  | Jatim    | Kab. Blitar         | 6.31  | 4.17  | -0.04  | 2.09   | 1.79  | 2.86                                         | EPGSD      |
| 69  | Jatim    | Kab. Kediri         | 6.89  | 4.58  | -0.39  | 0.92   | 3.96  | 3.19                                         | EPGSD      |
| 70  | Jatim    | Kab. Magetan        | 6.11  | 4.43  | -7.89  | 1.80   | 2.34  | 1.36                                         | EPGSR      |
| 71  | Jatim    | Kab. Mojokerto      | 7.18  | 4.98  | -8.07  | 1.17   | 2.96  | 1.64                                         | EPGSR      |
| 72  | Jatim    | Kab. Pamekasan      | 6.55  | 4.15  | -5.21  | -6.31  | 1.43  | 0.12                                         | EPGSR      |
| 73  | Jatim    | Kab. Pasuruan       | 7.21  | 5.48  | -13.68 | 5.77   | -0.41 | 0.87                                         | EPGSR      |
| 74  | Jatim    | Kab. Sidoarjo       | 8.97  | 5.02  | -15.92 | 1.72   | 3.07  | 0.57                                         | EPGSR      |
| 75  | Jatim    | Kota Kediri         | 13.19 | 11.81 | -2.49  | 1.45   | 5.76  | 5.94                                         | EPGST      |
| 76  | Jatim    | Kota Malang         | 8.72  | 4.96  | -8.78  | 1.54   | 2.96  | 1.88                                         | EPGR       |
| 77  | Jatim    | Kota Mojokerto      | 7.38  | 3.34  | -4.50  | 1.28   | 6.16  | 2.73                                         | EPGSD      |
| 78  | Jatim    | Kota Probolinggo    | 7.20  | 3.03  | -7.08  | 3.83   | 1.27  | 1.65                                         | EPGSR      |
| 79  | Jatim    | Kota Surabaya       | 10.50 | 6.71  | -1.88  | -15.25 | 2.90  | 0.60                                         | EPGSR      |
| 80  | Bali     | Kab. Badung         | 9.10  | 6.50  | -4.96  | 0.57   | 4.91  | 3.22                                         | EPGSD      |
| 81  | Bali     | Kab. Bangli         | 7.16  | 4.19  | -2.46  | 0.46   | 2.43  | 2.36                                         | EPGR       |
| 82  | Bali     | Kab. Buleleng       | 7.57  | 5.62  | -2.98  | 1.08   | 3.54  | 2.97                                         | EPGSD      |
| 83  | Bali     | Kab. Gianyar        | 8.24  | 6.03  | -2.62  | 1.76   | 4.70  | 3.62                                         | EPGSD      |
| 84  | Bali     | Kab. Jembrana       | 7.76  | 5.01  | -3.77  | 0.90   | 3.48  | 2.68                                         | EPGSD      |
| 85  | Bali     | Kab. Tabanan        | 7.25  | 4.92  | -3.96  | 0.58   | 2.49  | 2.26                                         | EPGR       |
| 86  | Bali     | Kota Denpasar       | 9.15  | 6.48  | -5.23  | 1.44   | 3.15  | 3.00                                         | EPGSD      |
| 87  | Kalbar   | Kab. Kapuas Hulu    | 8.84  | 6.08  | 1.33   | 2.77   | 3.60  | 4.52                                         | EPGT       |
| 88  | Kalbar   | Kab. Ketapang       | 10.15 | 7.44  | -2.89  | 2.53   | 2.70  | 3.99                                         | EPGT       |
| 89  | Kalbar   | Kab. Pontianak      | 10.82 | 6.33  | -7.42  | 0.95   | 1.16  | 2.37                                         | EPGR       |
| 90  | Kalbar   | Kab. Sambas         | 8.15  | 3.93  | 3.07   | 3.87   | 1.38  | 4.08                                         | EPGT       |
| 91  | Kalbar   | Kab. Sanggau        | 13.93 | 10.79 | 1.33   | 6.14   | 6.96  | 7.83                                         | EPGST      |
| 92  | Kalteng  | Kab. Barito Selatan | 9.41  | 7.02  | -4.94  | 0.97   | 1.80  | 2.85                                         | EPGSD      |
| 93  | Kalteng  | Kab. Barito Utara   | 16.80 | 7.79  | -6.08  | -5.31  | 9.47  | 4.53                                         | EPGT       |
| 94  | Kalteng  | Kab. Kapuas         | 10.30 | 6.17  | -6.45  | -0.55  | 1.81  | 2.26                                         | EPGR       |



| No. | Propinsi  | Kabupaten/Kota            | 1996  | 1997   | 1998   | 1999   | 2000   | Rata-rata<br>Pertumbuhan<br>PRDB 1996 - 2000 | Intensitas |
|-----|-----------|---------------------------|-------|--------|--------|--------|--------|----------------------------------------------|------------|
| 95  | Kalsel    | Kab. Hulu Sungai Selatan  | 6.48  | 3.26   | -4.67  | 2.25   | 4.32   | 2.33                                         | EPGR       |
| 96  | Kalsel    | Kab. Hulu Sungai Tengah   | 7.62  | 1.64   | -18.06 | 0.72   | 8.67   | 0.12                                         | EPGSR      |
| 97  | Kalsel    | Kab. Hulu Sungai Utara 1) | 20.04 | 0.84   | -7.41  | 2.08   | 9.65   | 5.04                                         | EPGST      |
| 98  | Kalsel    | Kab. Tabalong 1)          | 15.17 | 9.79   | 15.71  | 16.44  | 5.48   | 12.52                                        | EPGST      |
| 99  | Kalsel    | Kab. Tanah Laut           | 8.83  | 0.56   | -13.84 | 4.31   | 6.71   | 1.31                                         | EPGSR      |
| 100 | Kalsel    | Kab. Tapin                | 8.19  | 3.87   | -1.85  | 0.17   | 9.37   | 3.95                                         | EPGT       |
| 101 | Kaltim    | Kab. Berau                | 13.09 | -0.65  | 16.76  | 6.93   | 12.62  | 9.75                                         | EPGST      |
| 102 | Kaltim    | Kab. Kutai 1)             | 16.14 | 5.06   | -4.56  | 8.43   | 0.82   | 5.18                                         | EPGST      |
| 103 | Kaltim    | Kab. Pasir                | 9.73  | 5.53   | 0.72   | 3.54   | 4.22   | 4.75                                         | EPGT       |
| 104 | Kaltim    | Kota Balikpapan 1)        | 12.99 | 8.25   | -1.13  | 5.79   | 4.65   | 6.11                                         | EPGST      |
| 105 | Kaltim    | Kota Samarinda            | 7.39  | 5.59   | 0.57   | 4.71   | 5.32   | 4.72                                         | EPGT       |
| 106 | Sulut     | Kab. Minahasa             | 14.98 | 6.08   | 2.12   | 6.63   | 7.18   | 7.40                                         | EPGST      |
| 107 | Sulut     | Kab. Sangihe Talaud       | 10.44 | 4.06   | 2.43   | 3.81   | 4.61   | 5.07                                         | EPGST      |
| 108 | Sulut     | Kota Bitung               | 13.77 | 7.05   | 3.22   | 6.64   | 7.58   | 7.65                                         | EPGST      |
| 109 | Sulut     | Kota Manado               | 10.74 | 2.67   | 0.32   | 1.62   | 5.94   | 4.26                                         | EPGT       |
| 110 | Gorontalo | Kab. Gorontalo            | 9.85  | 4.62   | -2.44  | 3.06   | -30.64 | -3.11                                        | EPGSR      |
| 111 | Gorontalo | Kota Gorontalo            | 9.89  | 5.37   | 2.71   | 4.27   | 11.88  | 6.82                                         | EPGST      |
| 112 | Sulteng   | Kab. Banggai              | 7.80  | 182.04 | -4.43  | 3.26   | 3.53   | 38.44                                        | EPGST      |
| 113 | Sulteng   | Kab. Toli-toli            |       | 25.53  | -4.63  | 2.91   | 12.74  | 9.14                                         | EPGST      |
| 114 | Sulteng   | Kab. Donggala             | 8.07  | 4.45   | -3.29  | 3.42   |        | 3.16                                         | EPGSD      |
| 115 | Sulteng   | Kab. Morowali             |       | 8.89   | 0.66   | 4.76   | 3.90   | 4.55                                         | EPGT       |
| 116 | Sulteng   | Kab. Poso                 | 8.42  | 5.15   | -3.40  | 2.12   |        | 3.07                                         | EPGSD      |
| 117 | Sultra    | Kab. Buton                | 5.17  | 2.91   | -9.66  | 3.20   | 5.05   | 1.33                                         | EPGSR      |
| 118 | Sultra    | Kab. Kolaka               | 2.23  | 6.36   | -1.05  | -0.93  | 6.59   | 2.64                                         | EPGSD      |
| 119 | Sulsel    | Kab. Luwu                 | 9.34  | 2.01   | -4.13  | -64.69 | 11.44  | -9.21                                        | EPGSR      |
| 120 | Sulsel    | Kab. Majene               | 10.81 | 4.66   | -6.78  | 4.10   | 2.02   | 2.96                                         | EPGSD      |
| 121 | Sulsel    | Kab. Pangkajene Kepulauan | 6.39  | 11.86  | -6.71  | 5.86   | 5.58   | 4.60                                         | EPGT       |
| 122 | Sulsel    | Kab. Pinrang              | 6.99  | 2.68   | -3.54  | 0.97   | 4.54   | 2.33                                         | EPGR       |
| 123 | Sulsel    | Kab. Tana Toraja          | 9.12  | 4.68   | -3.38  | 1.04   | 2.53   | 2.80                                         | EPGSD      |
| 124 | Sulsel    | Kota Pare-pare            | 8.65  | 8.45   | -5.45  | 0.78   | 10.49  | 4.58                                         | EPGT       |
| 125 | NTB       | Kab. Bima                 | 7.52  | 4.56   | -2.44  | 3.01   | 3.41   | 3.21                                         | EPGSD      |
| 126 | NTB       | Kab. Lombok Barat         | 7.23  | 5.17   | -5.63  | 1.61   | 2.16   | 2.11                                         | EPGR       |
| 127 | NTB       | Kota Mataram              | 10.82 | 7.56   | -2.60  | 1.29   | 2.11   | 3.84                                         | EPGT       |
| 128 | NTT       | Kab. Ende                 | 7.30  | 6.25   | -10.24 | 5.75   | 4.85   | 2.78                                         | EPGSD      |
| 129 | NTT       | Kab. Flores Timur         | 8.44  | 3.15   | -7.02  | 12.16  | -4.11  | 2.52                                         | EPGSD      |
| 130 | NTT       | Kab. Timor Tengah Selatan | 3.83  | 10.17  | -8.93  | 8.72   | 4.65   | 3.69                                         | EPGSD      |
| 131 | NTT       | Kab. Timor Tengah Utara   | 7.04  | 7.25   | 2.67   | -2.72  | 3.74   | 3.60                                         | EPGSD      |
| 132 | NTT       | Kota Kupang               |       | 4.27   | -8.51  | 5.95   | 4.71   | 1.61                                         | EPGSR      |
| 133 | Papua     | Kab. Fak-fak              | 18.24 | 3.98   | 35.27  | -1.36  | -1.36  | 10.95                                        | EPGST      |
| 134 | Papua     | Kab. Manokwari            | 7.98  | 6.13   | -10.70 | -1.03  | 9.59   | 2.39                                         | EPGR       |

Sumber : Pertumbuhan PDRB Kabupaten / Kota Seluruh Indonesia  
Atas Harga Konstan 1993 tahun

Rata-rata : 3.1  
Standev : 4.9

**Keterangan :**

**EPG** : Singkatan dari Ekonomi Daerah - Potensi Ekonomi - Growth/Pertumbuhan Ekonomi

Huruf setelah EPG : **ST** : Sangat Tinggi,

**T** : Tinggi

**SD** : Sedang

**R** : Rendah

**SR** : Sangat Rendah

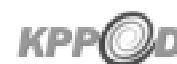

Lampiran 4.2.2.1.3.  
Indikator Indeks Pembangunan Manusia

| No. | Propinsi | Kabupaten/Kota            | IPM 1999 | Intensitas |
|-----|----------|---------------------------|----------|------------|
| 1   | Sumut    | KAB. ASAHAN               | 65.15    | EPISD      |
| 2   | Sumut    | KAB. DAIRI                | 61.11    | EPISD      |
| 3   | Sumut    | KAB. DELI SERDANG         | 66.12    | EPISD      |
| 4   | Sumut    | KAB. LANGKAT              | 67.10    | EPISD      |
| 5   | Sumut    | KAB. SIMALUNGUN           | 65.11    | EPISD      |
| 6   | Sumut    | KOTA BINJAI               | 68.50    | EPISD      |
| 7   | Sumut    | KOTA MEDAN                | 70.77    | EPIT       |
| 8   | Sumut    | KOTA PEMATANG SIANTAR     | 70.87    | EPIT       |
| 9   | Sumut    | KOTA SIBOLGA              | 68.92    | EPISD      |
| 10  | Sumut    | KOTA TANJUNG BALAI        | 66.80    | EPISD      |
| 11  | Sumut    | KOTA TEBING TINGGI        | 69.51    | EPIT       |
| 12  | Sumbar   | KAB. PESISIR SELATAN      | 64.37    | EPISD      |
| 13  | Sumbar   | KAB. SAWAHLUNTO/SIJUNJUNG | 61.90    | EPISD      |
| 14  | Sumbar   | KOTA PADANG               | 70.43    | EPIT       |
| 15  | Sumbar   | KOTA SAWAH LUNTO          | 68.85    | EPISD      |
| 16  | Riau     | KAB. BENGKALIS            | 66.95    | EPISD      |
| 17  | Riau     | KAB. INDRAGIRI HILIR      | 66.29    | EPISD      |
| 18  | Riau     | KAB. KAMPAR               | 65.30    | EPISD      |
| 19  | Riau     | KOTA BATAM                | 70.94    | EPIT       |
| 20  | Riau     | KOTA PEKAN BARU           | 71.67    | EPIT       |
| 21  | Jambi    | KAB. BATANGHARI           | 64.62    | EPISD      |
| 22  | Jambi    | KAB. BUNGOTEBO            | 62.72    | EPISD      |
| 23  | Jambi    | KAB. KERINCI              | 67.47    | EPISD      |
| 24  | Sumsel   | KAB. MUARA ENIM           | 63.08    | EPISD      |
| 25  | Sumsel   | KAB. MUSI BANYUASIN       | 53.83    | EPISR      |
| 26  | Sumsel   | KAB. MUSI RAWAS           | 60.38    | EPISD      |
| 27  | Sumsel   | KAB. OGAN KOMERING ILIR   | 59.79    | EPIR       |
| 28  | Sumsel   | KOTA PALEMBANG            | 68.28    | EPISD      |
| 29  | Babel    | KAB. BANGKA               | 63.48    | EPISD      |
| 30  | Babel    | KOTA PANGKAL PINANG       | 67.97    | EPISD      |
| 31  | Bengkulu | KAB. BENGKULU SELATAN     | 62.04    | EPISD      |
| 32  | Bengkulu | KOTA BENGKULU             | 71.84    | EPIT       |
| 33  | Lampung  | KAB. LAMPUNG BARAT        | 62.77    | EPISD      |
| 34  | Lampung  | KAB. LAMPUNG SELATAN      | 63.37    | EPISD      |
| 35  | Lampung  | KAB. LAMPUNG TIMUR        |          |            |
| 36  | Lampung  | KOTA BANDAR LAMPUNG       | 68.49    | EPISD      |
| 37  | Banten   | KAB. LEBAK                | 61.04    | EPISD      |
| 38  | Banten   | KAB. SERANG               | 60.84    | EPISD      |
| 39  | Banten   | KAB. TANGERANG            | 63.51    | EPISD      |
| 40  | Banten   | KOTA TANGERANG            | 68.25    | EPISD      |
| 41  | Jabar    | KAB. BEKASI               | 64.73    | EPISD      |
| 42  | Jabar    | KAB. BOGOR                | 66.59    | EPISD      |
| 43  | Jabar    | KAB. CIAMIS               | 64.80    | EPISD      |
| 44  | Jabar    | KAB. CIREBON              | 61.60    | EPISD      |
| 45  | Jabar    | KAB. GARUT                | 61.72    | EPISD      |
| 46  | Jabar    | KAB. INDRAMAYU            | 56.54    | EPIR       |
| 47  | Jabar    | KAB. KARAWANG             | 60.88    | EPISD      |

| No. | Propinsi | Kabupaten/Kota      | IPM 1999 | Intensitas |
|-----|----------|---------------------|----------|------------|
| 48  | Jabar    | KAB. KUNINGAN       | 65.62    | EPISD      |
| 49  | Jabar    | KAB. SUKABUMI       | 63.19    | EPISD      |
| 50  | Jabar    | KAB. SUMEDANG       | 66.63    | EPISD      |
| 51  | Jabar    | KAB. TASIKMALAYA    | 65.30    | EPISD      |
| 52  | Jabar    | KOTA BEKASI         | 68.66    | EPISD      |
| 53  | Jabar    | KOTA BOGOR          | 69.69    | EPIT       |
| 54  | Jabar    | KOTA CIREBON        | 68.11    | EPISD      |
| 55  | Jabar    | KOTA SUKABUMI       | 68.39    | EPISD      |
| 56  | Jateng   | KAB. KENDAL         | 62.12    | EPISD      |
| 57  | Jateng   | KAB. MAGELANG       | 65.13    | EPISD      |
| 58  | Jateng   | KAB. PEKALONGAN     | 61.79    | EPISD      |
| 59  | Jateng   | KAB. PEMALANG       | 60.73    | EPISD      |
| 60  | Jateng   | KAB. SUKOHARJO      | 66.49    | EPISD      |
| 61  | Jateng   | KAB. TEGAL          | 62.22    | EPISD      |
| 62  | Jateng   | KOTA PEKALONGAN     | 65.87    | EPISD      |
| 63  | Jateng   | KOTA SEMARANG       | 70.16    | EPIT       |
| 64  | Jateng   | KOTA TEGAL          | 65.26    | EPISD      |
| 65  | DIY      | KOTA YOGYAKARTA     | 73.37    | EPIT       |
| 66  | Jatim    | KAB. BANGKALAN      | 52.38    | EPISR      |
| 67  | Jatim    | KAB. BANYUWANGI     | 61.32    | EPISD      |
| 68  | Jatim    | KAB. BLITAR         | 63.82    | EPISD      |
| 69  | Jatim    | KAB. KEDIRI         | 64.20    | EPISD      |
| 70  | Jatim    | KAB. MAGETAN        | 64.73    | EPISD      |
| 71  | Jatim    | KAB. MOJOKERTO      | 64.59    | EPISD      |
| 72  | Jatim    | KAB. PAMEKASAN      | 55.46    | EPISR      |
| 73  | Jatim    | KAB. PASURUAN       | 58.87    | EPIR       |
| 74  | Jatim    | KAB. SIDOARJO       | 69.09    | EPIT       |
| 75  | Jatim    | KOTA KEDIRI         | 68.62    | EPISD      |
| 76  | Jatim    | KOTA MALANG         | 67.95    | EPISD      |
| 77  | Jatim    | KOTA MOJOKERTO      | 68.59    | EPISD      |
| 78  | Jatim    | KOTA PROBOLINGGO    | 65.11    | EPISD      |
| 79  | Jatim    | KOTA SURABAYA       | 69.27    | EPIT       |
| 80  | Bali     | KAB. BADUNG         | 68.24    | EPISD      |
| 81  | Bali     | KAB. BANGLI         | 64.40    | EPISD      |
| 82  | Bali     | KAB. BULELENG       | 63.12    | EPISD      |
| 83  | Bali     | KAB. GIANYAR        | 64.43    | EPISD      |
| 84  | Bali     | KAB. JEMBRANA       | 65.50    | EPISD      |
| 85  | Bali     | KAB. TABANAN        | 68.74    | EPISD      |
| 86  | Bali     | KOTA DENPASAR       | 72.05    | EPIT       |
| 87  | Kalbar   | KAB. KAPUAS HULU    | 60.82    | EPISD      |
| 88  | Kalbar   | KAB. KETAPANG       | 60.78    | EPISD      |
| 89  | Kalbar   | KAB. PONTIANAK      | 60.85    | EPISD      |
| 90  | Kalbar   | KAB. SAMBAS         | 55.81    | EPIR       |
| 91  | Kalbar   | KAB. SANGGAU        | 60.99    | EPISD      |
| 92  | Kalteng  | KAB. BARITO SELATAN | 65.89    | EPISD      |
| 93  | Kalteng  | KAB. BARITO UTARA   | 67.42    | EPISD      |
| 94  | Kalteng  | KAB. KAPUAS         | 67.06    | EPISD      |

| No. | Propinsi  | Kabupaten/Kota              | IPM 1999 | Intensitas |
|-----|-----------|-----------------------------|----------|------------|
| 95  | Kalsel    | KAB. HULU SUNGAI SELATAN    | 61.93    | EPISD      |
| 96  | Kalsel    | KAB. HULU SUNGAI TENGAH     | 61.68    | EPISD      |
| 97  | Kalsel    | KAB. HULU SUNGAI UTARA      | 60.59    | EPISD      |
| 98  | Kalsel    | KAB. TABALONG               | 61.79    | EPISD      |
| 99  | Kalsel    | KAB. TANAH LAUT             | 62.48    | EPISD      |
| 100 | Kalsel    | KAB. TAPIN                  | 63.87    | EPISD      |
| 101 | Kaltim    | KAB. BERAU                  | 64.95    | EPISD      |
| 102 | Kaltim    | KAB. KUTAI                  | 65.84    | EPISD      |
| 103 | Kaltim    | KAB. PASIR                  | 64.74    | EPISD      |
| 104 | Kaltim    | KOTA BALIKPAPAN             | 70.62    | EPIT       |
| 105 | Kaltim    | KOTA SAMARINDA              | 69.14    | EPIT       |
| 106 | Sulut     | KAB. MINAHASA               | 69.35    | EPIT       |
| 107 | Sulut     | KAB. SANGIHE TALAUD         | 67.99    | EPISD      |
| 108 | Sulut     | KOTA BITUNG                 | 67.56    | EPISD      |
| 109 | Sulut     | KOTA MANADO                 | 72.48    | EPIT       |
| 110 | Gorontalo | KAB. GORONTALO              | 63.30    | EPISD      |
| 111 | Gorontalo | KOTA GORONTALO              | 66.73    | EPISD      |
| 112 | Sulteng   | KAB. BANGGAI                | 62.36    | EPISD      |
| 113 | Sulteng   | KAB. BUOL                   | 61.65    | EPISD      |
| 114 | Sulteng   | KAB. DONGGALA               | 59.99    | EPISD      |
| 115 | Sulteng   | KAB. MOROWALI               |          |            |
| 116 | Sulteng   | KAB. POSO                   | 62.59    | EPISD      |
| 117 | Sultra    | KAB. BUTON                  | 62.45    | EPISD      |
| 118 | Sultra    | KAB. KOLAKA                 | 62.11    | EPISD      |
| 119 | Sulsel    | KAB. LUWU                   | 68.00    | EPISD      |
| 120 | Sulsel    | KAB. MAJENE                 | 62.07    | EPISD      |
| 121 | Sulsel    | KAB. PANGKAJENE & KEPULAUAN | 62.70    | EPISD      |
| 122 | Sulsel    | KAB. PINRANG                | 63.55    | EPISD      |
| 123 | Sulsel    | KAB. TANA TORAJA            | 63.47    | EPISD      |
| 124 | Sulsel    | KOTA PARE-PARE              | 69.73    | EPIT       |
| 125 | NTB       | KAB. BIMA                   | 57.35    | EPIR       |
| 126 | NTB       | KAB. LOMBOK BARAT           | 49.95    | EPISR      |
| 127 | NTB       | KOTA MATARAM                | 63.10    | EPISD      |
| 128 | NTT       | KAB. ENDE                   | 55.78    | EPIR       |
| 129 | NTT       | KAB. FLORES TIMUR           | 58.07    | EPIR       |
| 130 | NTT       | KAB. TIMOR TENGAH SELATAN   | 49.20    | EPISR      |
| 131 | NTT       | KAB. TIMOR TENGAH UTARA     | 53.66    | EPISR      |
| 132 | NTT       | KOTA KUPANG                 | 66.63    | EPISD      |
| 133 | Papua     | KAB. FAKFAK                 | 67.33    | EPISD      |
| 134 | Papua     | KAB. MANOKWARI              | 60.13    | EPISD      |

Sumber : BPS

Rata-rata : 64.43  
Standev : 4.51

**Keterangan :**

*EPI* : Singkatan dari *Ekonomi Daerah - Potensi Ekonomi - IPM*

Huruf setelah *EPI* : **ST** : Sangat Tinggi,

**T** : Tinggi

**SD** : Sedang

**R** : Rendah

**SR** : Sangat Rendah





Lampiran 4.2.2.2.

Variabel Struktur Ekonomi

Indikator Nilai Tambah Sektor Primer - Sektor Sekunder - Sektor Tersier

| No. | Propinsi | Kabupaten/Kota          | Indikator Nilai Tambah Sektor Sekunder |            | Indikator Nilai Tambah Sektor Tersier |            | Indikator Nilai Tambah Sektor Primer |            |
|-----|----------|-------------------------|----------------------------------------|------------|---------------------------------------|------------|--------------------------------------|------------|
|     |          |                         | Sektor Sekunder                        | Intensitas | Sektor Tersier                        | Intensitas | Sektor Primer (Pertanian Non pangan) | Intensitas |
| 1   | Sumut    | Kab. Asahan             | 41.52                                  | ESSST      | 20.54                                 | ESTSR      | 32.20                                | ESPT       |
| 2   | Sumut    | Kab. Dairi              | 6.75                                   | ESSSR      | 22.47                                 | ESTSR      | 23.82                                | ESPSD      |
| 3   | Sumut    | Kab. Deli Serdang       | 38.34                                  | ESST       | 24.37                                 | ESTSR      | 23.13                                | ESPSD      |
| 4   | Sumut    | Kab. Langkat            | 13.17                                  | ESSK       | 19.07                                 | ESTSR      | 52.78                                | ESPST      |
| 5   | Sumut    | Kab. Simalungun         | 20.89                                  | ESSD       | 18.62                                 | ESTSR      | 36.33                                | ESPT       |
| 6   | Sumut    | Kota Binjai             | 39.29                                  | ESST       | 49.35                                 | ESTSD      | 6.25                                 | ESPR       |
| 7   | Sumut    | Kota Medan              | 28.00                                  | ESSD       | 67.17                                 | ESTST      | 4.17                                 | ESPR       |
| 8   | Sumut    | Kota Pematang Siantar   | 44.42                                  | ESSST      | 52.17                                 | ESTSD      | 2.30                                 | ESPSR      |
| 9   | Sumut    | Kota Sibolga            | 29.27                                  | ESSD       | 42.13                                 | ESTSD      | 28.58                                | ESPSD      |
| 10  | Sumut    | Kota Tanjung Balai      | 28.67                                  | ESSD       | 42.49                                 | ESTSD      | 27.05                                | ESPSD      |
| 11  | Sumut    | Kota Tebing Tinggi      | 35.25                                  | ESST       | 56.03                                 | ESTST      | 5.90                                 | ESPR       |
| 12  | Sumbar   | Kab. Pesisir Selatan    | 16.36                                  | ESSD       | 49.69                                 | ESTSD      | 14.24                                | ESPSD      |
| 13  | Sumbar   | Kab. Sijunjung          | 16.16                                  | ESSD       | 40.08                                 | ESTSD      | 35.67                                | ESPT       |
| 14  | Sumbar   | Kota Padang             | 22.51                                  | ESSD       | 71.96                                 | ESTST      | 4.06                                 | ESPR       |
| 15  | Sumbar   | Kota Sawah Lunto        | 13.90                                  | ESSK       | 40.34                                 | ESTSD      | 42.96                                | ESPST      |
| 16  | Riau     | Kab. Bengkalis          | 15.02                                  | ESSD       | 49.65                                 | ESTSD      | 24.57                                | ESPSD      |
| 17  | Riau     | Kab. Indragiri Hilir    | 13.97                                  | ESSK       | 36.90                                 | ESTSD      | 36.83                                | ESPT       |
| 18  | Riau     | Kab. Kampar             | 11.70                                  | ESSK       | 30.09                                 | ESTR       | 41.50                                | ESPST      |
| 19  | Riau     | Kota Batam              | 74.66                                  | ESSST      | 22.87                                 | ESTSR      | 2.47                                 | ESPSR      |
| 20  | Riau     | Kota Pekanbaru          | 19.55                                  | ESSD       | 79.05                                 | ESTST      | 1.16                                 | ESPSR      |
| 21  | Jambi    | Kab. Batanghari         | 20.32                                  | ESSD       | 34.10                                 | ESTSD      | 36.54                                | ESPT       |
| 22  | Jambi    | Kab. Bungo              | 9.51                                   | ESSK       | 41.37                                 | ESTSD      | 29.16                                | ESPSD      |
| 23  | Jambi    | Kab. Kerinci            | 8.13                                   | ESSK       | 47.72                                 | ESTSD      | 18.40                                | ESPSD      |
| 24  | Sumsel   | Kab. Muara Enim         | 7.24                                   | ESSK       | 8.86                                  | ESTSR      | 81.32                                | ESPST      |
| 25  | Sumsel   | Kab. Musi Banyu Asin    | 29.45                                  | ESSD       | 16.33                                 | ESTSR      | 50.24                                | ESPST      |
| 26  | Sumsel   | Kab. Musi Rawas         | 15.97                                  | ESSD       | 22.15                                 | ESTSR      | 53.75                                | ESPST      |
| 27  | Sumsel   | Kab. Ogan Komering Ilir | 21.22                                  | ESSD       | 32.99                                 | ESTR       | 34.52                                | ESPT       |
| 28  | Sumsel   | Kota Palembang          | 46.83                                  | ESSST      | 52.46                                 | ESTSD      | 0.48                                 | ESPSR      |
| 29  | Babel    | Kab. Bangka             | 40.70                                  | ESSST      | 16.97                                 | ESTSR      | 38.57                                | ESPT       |
| 30  | Babel    | Kota Pangkal Pinang     | 21.62                                  | ESSD       | 56.30                                 | ESTST      | 21.49                                | ESPSD      |
| 31  | Bengkulu | Kab. Bengkulu Selatan   | 10.35                                  | ESSK       | 49.83                                 | ESTSD      | 21.29                                | ESPSD      |
| 32  | Bengkulu | Kota Bengkulu           | 10.38                                  | ESSK       | 84.93                                 | ESTST      | 4.09                                 | ESPR       |
| 33  | Lampung  | Kab. Lampung Barat      | 6.29                                   | ESSSR      | 22.97                                 | ESTSR      | 49.20                                | ESPST      |
| 34  | Lampung  | Kab. Lampung Selatan    | 17.74                                  | ESSD       | 27.00                                 | ESTR       | 32.85                                | ESPT       |
| 35  | Lampung  | Kab. Lampung Timur      | 10.31                                  | ESSK       | 24.76                                 | ESTR       | 40.50                                | ESPST      |
| 36  | Lampung  | Kota Bandar Lampung     | 38.84                                  | ESST       | 56.62                                 | ESTST      | 3.84                                 | ESPR       |
| 37  | Banten   | Kab. Lebak              | 13.44                                  | ESSK       | 45.33                                 | ESTSD      | 14.54                                | ESPSD      |
| 38  | Banten   | Kab. Serang             | 62.30                                  | ESSST      | 22.83                                 | ESTSR      | 6.12                                 | ESPR       |
| 39  | Banten   | Kab. Tangerang          | 65.71                                  | ESSST      | 24.30                                 | ESTSR      | 4.20                                 | ESPR       |
| 40  | Banten   | Kota Tangerang          | 61.63                                  | ESSST      | 38.14                                 | ESTSD      | 0.08                                 | ESPSR      |
| 41  | Jabar    | Kab. Bekasi             | 86.05                                  | ESSST      | 11.64                                 | ESTSR      | 0.73                                 | ESPSR      |
| 42  | Jabar    | Kab. Bogor              | 57.59                                  | ESSST      | 28.55                                 | ESTR       | 6.89                                 | ESPR       |
| 43  | Jabar    | Kab. Ciamis             | 16.60                                  | ESSD       | 46.49                                 | ESTSD      | 12.36                                | ESPSD      |
| 44  | Jabar    | Kab. Cirebon            | 21.76                                  | ESSD       | 46.63                                 | ESTSD      | 7.92                                 | ESPR       |
| 45  | Jabar    | Kab. Garut              | 12.53                                  | ESSK       | 46.69                                 | ESTSD      | 6.40                                 | ESPR       |
| 46  | Jabar    | Kab. Indramayu          | 13.76                                  | ESSK       | 14.55                                 | ESTSR      | 61.07                                | ESPST      |
| 47  | Jabar    | Kab. Karawang           | 36.39                                  | ESST       | 44.72                                 | ESTSD      | 3.22                                 | ESPR       |
| 48  | Jabar    | Kab. Kuningan           | 9.73                                   | ESSK       | 50.78                                 | ESTSD      | 9.01                                 | ESPR       |

| No. | Propinsi | Kabupaten/Kota           | Indikator Nilai Tambah Sektor Sekunder |            | Indikator Nilai Tambah Sektor Tersier |            | Indikator Nilai Tambah Sektor Primer |            |
|-----|----------|--------------------------|----------------------------------------|------------|---------------------------------------|------------|--------------------------------------|------------|
|     |          |                          | Sektor Sekunder                        | Intensitas | Sektor Tersier                        | Intensitas | Sektor Primer (Pertanian Non pangan) | Intensitas |
| 49  | Jabar    | Kab. Sukabumi            | 18.39                                  | ESSD       | 38.21                                 | ESTSD      | 19.62                                | ESPSD      |
| 50  | Jabar    | Kab. Sumedang            | 19.30                                  | ESSD       | 45.42                                 | ESTSD      | 7.96                                 | ESPR       |
| 51  | Jabar    | Kab. Tasik               | 17.27                                  | ESSD       | 53.13                                 | ESTSD      | 10.29                                | ESPSD      |
| 52  | Jabar    | Kota Bekasi              | 52.54                                  | ESSST      | 46.19                                 | ESTSD      | 0.82                                 | ESPSR      |
| 53  | Jabar    | Kota Bogor               | 38.64                                  | ESST       | 60.98                                 | ESTST      | 0.17                                 | ESPSR      |
| 54  | Jabar    | Kota Cirebon             | 47.71                                  | ESSST      | 51.91                                 | ESTSD      | 0.19                                 | ESPSR      |
| 55  | Jabar    | Kota Sukabumi            | 11.67                                  | ESSK       | 84.31                                 | ESTST      | 2.14                                 | ESPSR      |
| 56  | Jateng   | Kab. Kendal              | 41.50                                  | ESSST      | 29.04                                 | ESTR       | 13.25                                | ESPSD      |
| 57  | Jateng   | Kab. Magelang            | 23.32                                  | ESSD       | 37.00                                 | ESTSD      | 10.25                                | ESPSD      |
| 58  | Jateng   | Kab. Pekalongan          | 37.37                                  | ESST       | 42.17                                 | ESTSD      | 6.17                                 | ESPR       |
| 59  | Jateng   | Kab. Pemasang            | 23.24                                  | ESSD       | 37.69                                 | ESTSD      | 14.91                                | ESPSD      |
| 60  | Jateng   | Kab. Sukoharjo           | 32.26                                  | ESST       | 38.50                                 | ESTSD      | 8.41                                 | ESPR       |
| 61  | Jateng   | Kab. Tegal               | 28.64                                  | ESSD       | 44.23                                 | ESTSD      | 5.77                                 | ESPR       |
| 62  | Jateng   | Kota Pekalongan          | 35.21                                  | ESST       | 50.90                                 | ESTSD      | 11.85                                | ESPSD      |
| 63  | Jateng   | Kota Semarang            | 33.21                                  | ESST       | 65.10                                 | ESTST      | 1.00                                 | ESPSR      |
| 64  | Jateng   | Kota Tegal               | 30.01                                  | ESST       | 55.77                                 | ESTST      | 10.08                                | ESPSD      |
| 65  | DIY      | Kota Yogyakarta          | 20.21                                  | ESSD       | 78.65                                 | ESTST      | 0.99                                 | ESPSR      |
| 66  | Jatim    | Kab. Bangkalan           | 8.90                                   | ESSK       | 46.62                                 | ESTSD      | 9.98                                 | ESPR       |
| 67  | Jatim    | Kab. Banyuwangi          | 5.85                                   | ESSSR      | 34.97                                 | ESTSD      | 24.53                                | ESPSD      |
| 68  | Jatim    | Kab. Blitar              | 6.06                                   | ESSSR      | 45.87                                 | ESTSD      | 14.11                                | ESPSD      |
| 69  | Jatim    | Kab. Kediri              | 13.66                                  | ESSK       | 41.86                                 | ESTSD      | 13.49                                | ESPSD      |
| 70  | Jatim    | Kab. Magetan             | 16.84                                  | ESSD       | 40.85                                 | ESTSD      | 6.95                                 | ESPR       |
| 71  | Jatim    | Kab. Mojokerto           | 33.55                                  | ESST       | 37.15                                 | ESTSD      | 12.87                                | ESPSD      |
| 72  | Jatim    | Kab. Pamekasan           | 5.52                                   | ESSSR      | 30.52                                 | ESTR       | 30.28                                | ESPT       |
| 73  | Jatim    | Kab. Pasuruan            | 36.63                                  | ESST       | 31.41                                 | ESTR       | 9.24                                 | ESPR       |
| 74  | Jatim    | Kab. Sidoarjo            | 57.52                                  | ESSST      | 34.17                                 | ESTSD      | 5.84                                 | ESPR       |
| 75  | Jatim    | Kota Kediri              | 78.93                                  | ESSST      | 20.88                                 | ESTSR      | 0.14                                 | ESPSR      |
| 76  | Jatim    | Kota Malang              | 39.28                                  | ESST       | 59.96                                 | ESTST      | 0.47                                 | ESPSR      |
| 77  | Jatim    | Kota Mojokerto           | 26.62                                  | ESSD       | 71.72                                 | ESTST      | 0.82                                 | ESPSR      |
| 78  | Jatim    | Kota Probolinggo         | 30.46                                  | ESST       | 59.44                                 | ESTST      | 3.54                                 | ESPR       |
| 79  | Jatim    | Kota Surabaya            | 46.51                                  | ESSST      | 53.27                                 | ESTSD      | 0.20                                 | ESPSR      |
| 80  | Bali     | Kab. Badung              | 8.99                                   | ESSK       | 82.16                                 | ESTST      | 3.67                                 | ESPR       |
| 81  | Bali     | Kab. Bangli              | 12.96                                  | ESSK       | 52.86                                 | ESTSD      | 6.68                                 | ESPR       |
| 82  | Bali     | Kab. Buleleng            | 13.07                                  | ESSK       | 59.23                                 | ESTST      | 11.53                                | ESPSD      |
| 83  | Bali     | Kab. Gianyar             | 27.52                                  | ESSD       | 53.41                                 | ESTSD      | 7.38                                 | ESPR       |
| 84  | Bali     | Kab. Jembrana            | 13.29                                  | ESSK       | 56.60                                 | ESTST      | 20.55                                | ESPSD      |
| 85  | Bali     | Kab. Tabanan             | 12.00                                  | ESSK       | 49.66                                 | ESTSD      | 13.13                                | ESPSD      |
| 86  | Bali     | Kota Denpasar            | 18.77                                  | ESSD       | 72.86                                 | ESTST      | 6.44                                 | ESPR       |
| 87  | Kalbar   | Kab. Kapuas Hulu         | 9.17                                   | ESSK       | 38.51                                 | ESTSD      | 38.93                                | ESPT       |
| 88  | Kalbar   | Kab. Ketapang            | 25.09                                  | ESSD       | 41.75                                 | ESTSD      | 27.05                                | ESPSD      |
| 89  | Kalbar   | Kab. Pontianak           | 46.91                                  | ESSST      | 31.42                                 | ESTR       | 17.47                                | ESPSD      |
| 90  | Kalbar   | Kab. Sambas              | 14.40                                  | ESSK       | 44.86                                 | ESTSD      | 10.78                                | ESPSD      |
| 91  | Kalbar   | Kab. Sanggau             | 33.41                                  | ESST       | 25.35                                 | ESTR       | 32.84                                | ESPT       |
| 92  | Kalteng  | Kab. Barito Selatan      | 13.81                                  | ESSK       | 35.39                                 | ESTSD      | 43.83                                | ESPST      |
| 93  | Kalteng  | Kab. Barito Utara        | 4.45                                   | ESSSR      | 28.95                                 | ESTR       | 59.37                                | ESPST      |
| 94  | Kalteng  | Kab. Kapuas              | 15.14                                  | ESSD       | 32.44                                 | ESTR       | 32.02                                | ESPT       |
| 95  | Kalsel   | Kab. Hulu Sungai Selatan | 11.65                                  | ESSK       | 43.10                                 | ESTSD      | 12.07                                | ESPSD      |
| 96  | Kalsel   | Kab. Hulu Sungai Utara   | 13.30                                  | ESSK       | 47.03                                 | ESTSD      | 18.49                                | ESPSD      |

| No. | Propinsi  | Kabupaten/Kota            | Indikator Nilai Tambah Sektor Sekunder |            | Indikator Nilai Tambah Sektor Tersier |            | Indikator Nilai Tambah Sektor Primer |            |
|-----|-----------|---------------------------|----------------------------------------|------------|---------------------------------------|------------|--------------------------------------|------------|
|     |           |                           | Sektor Sekunder                        | Intensitas | Sektor Tersier                        | Intensitas | Sektor Primer (Pertanian Non pangan) | Intensitas |
| 97  | Kalsel    | Kab. Hulu Sungai Tengah   | 7.19                                   | ESSK       | 24.15                                 | ESTSR      | 54.58                                | ESPST      |
| 98  | Kalsel    | Kab. Tabalong             | 3.71                                   | ESSSR      | 16.82                                 | ESTSR      | 70.93                                | ESPST      |
| 99  | Kalsel    | Kab. Tanah Laut           | 23.81                                  | ESSD       | 33.26                                 | ESTR       | 21.38                                | ESPSD      |
| 100 | Kalsel    | Kab. Tapin                | 9.68                                   | ESSK       | 37.36                                 | ESTSD      | 20.23                                | ESPSD      |
| 101 | Kaltim    | Kab. Berau                | 17.32                                  | ESSD       | 22.88                                 | ESTSR      | 57.94                                | ESPST      |
| 102 | Kaltim    | Kab. Kutai                | 5.28                                   | ESSSR      | 5.73                                  | ESTSR      | 86.69                                | ESPST      |
| 103 | Kaltim    | Kab. Pasir                | 15.42                                  | ESSD       | 19.57                                 | ESTSR      | 60.61                                | ESPST      |
| 104 | Kaltim    | Kota Balikpapan           | 48.78                                  | ESSST      | 42.13                                 | ESTSD      | 8.65                                 | ESPR       |
| 105 | Kaltim    | Kota Samarinda            | 39.36                                  | ESST       | 57.15                                 | ESTST      | 2.20                                 | ESPSR      |
| 106 | Sulut     | Kab. Minahasa             | 21.35                                  | ESSD       | 32.33                                 | ESTR       | 34.78                                | ESPT       |
| 107 | Sulut     | Kab. Sangiatalaut         | 10.27                                  | ESSK       | 38.19                                 | ESTSD      | 46.44                                | ESPST      |
| 108 | Sulut     | Kota Bitung               | 39.35                                  | ESST       | 48.79                                 | ESTSD      | 9.83                                 | ESPR       |
| 109 | Sulut     | Kota Manado               | 18.34                                  | ESSD       | 78.54                                 | ESTST      | 3.01                                 | ESPR       |
| 110 | Gorontalo | Kab. Gorontalo            | 19.76                                  | ESSD       | 35.56                                 | ESTSD      | 28.91                                | ESPSD      |
| 111 | Gorontalo | Kota Gorontalo            | 12.84                                  | ESSK       | 75.44                                 | ESTST      | 7.96                                 | ESPR       |
| 112 | Sulteng   | Kab. Banggai              | 15.44                                  | ESSD       | 28.72                                 | ESTR       | 37.20                                | ESPT       |
| 113 | Sulteng   | Kab. Tolitoli             | 13.71                                  | ESSK       | 33.06                                 | ESTR       | 38.94                                | ESPT       |
| 114 | Sulteng   | Kab. Donggala*)           | 12.57                                  | ESSK       | 20.21                                 | ESTSR      | 33.49                                | ESPT       |
| 115 | Sulteng   | Kab. Morowali             | 7.98                                   | ESSK       | 28.39                                 | ESTR       | 51.52                                | ESPST      |
| 116 | Sulteng   | Kab. Poso*)               | 16.93                                  | ESSD       | 22.60                                 | ESTSR      | 35.18                                | ESPT       |
| 117 | Sultra    | Kab. Buton                | 15.28                                  | ESSD       | 46.76                                 | ESTSD      | 27.87                                | ESPSD      |
| 118 | Sultra    | Kab. Kolaka               | 23.51                                  | ESSD       | 27.14                                 | ESTR       | 42.12                                | ESPST      |
| 119 | Sulsel    | Kab. Luwu                 | 16.10                                  | ESSD       | 28.81                                 | ESTR       | 43.45                                | ESPST      |
| 120 | Sulsel    | Kab. Majene               | 9.42                                   | ESSK       | 31.49                                 | ESTR       | 32.04                                | ESPT       |
| 121 | Sulsel    | Kab. Pangkajene Kepulauan | 56.15                                  | ESSST      | 17.06                                 | ESTSR      | 20.06                                | ESPSD      |
| 122 | Sulsel    | Kab. Pinrang              | 8.19                                   | ESSK       | 21.87                                 | ESTSR      | 38.56                                | ESPT       |
| 123 | Sulsel    | Kab. Tana Toraja          | 8.99                                   | ESSK       | 32.68                                 | ESTR       | 28.77                                | ESPSD      |
| 124 | Sulsel    | Kota Parepare             | 14.27                                  | ESSK       | 75.70                                 | ESTST      | 8.48                                 | ESPR       |
| 125 | NTB       | Kab. Bima                 | 9.66                                   | ESSK       | 41.72                                 | ESTSD      | 14.98                                | ESPSD      |
| 126 | NTB       | Kab. Lombok Barat         | 13.68                                  | ESSK       | 46.65                                 | ESTSD      | 17.63                                | ESPSD      |
| 127 | NTB       | Kota Mataram              | 21.32                                  | ESSD       | 74.54                                 | ESTST      | 1.57                                 | ESPSR      |
| 128 | NTT       | Kab. Ende                 | 11.29                                  | ESSK       | 51.86                                 | ESTSD      | 20.84                                | ESPSD      |
| 129 | NTT       | Kab. Flores Timur         | 5.97                                   | ESSSR      | 51.06                                 | ESTSD      | 25.43                                | ESPSD      |
| 130 | NTT       | Kab. Timor Tengah Selatan | 6.39                                   | ESSSR      | 30.77                                 | ESTR       | 22.99                                | ESPSD      |
| 131 | NTT       | Kab. Timor Tengah Utara   | 9.51                                   | ESSK       | 31.14                                 | ESTR       | 25.12                                | ESPSD      |
| 132 | NTT       | Kota Kupang               | 16.64                                  | ESSD       | 77.07                                 | ESTST      | 4.93                                 | ESPR       |
| 133 | Papua     | Kab. Fakfak               | 32.05                                  | ESST       | 31.35                                 | ESTR       | 33.28                                | ESPT       |
| 134 | Papua     | Kab. Manokwari            | 16.45                                  | ESSD       | 23.30                                 | ESTSR      | 47.27                                | ESPST      |

Sumber : PDRB Kabupaten / Kota di Indonesia atas Harga Konstan Th.1993, Tahun 2000  
Rata-rata : 23.62 41.68 21.20  
Standev : 16.71 17.35 18.64

**Keterangan :**

**ESS** : Singkatan dari Ekonomi Daerah - Struktur Ekonomi - Sektor Sekunder  
**EST** : Singkatan dari Ekonomi Daerah - Struktur Ekonomi - Sektor Tersier  
**ESP** : Singkatan dari Ekonomi Daerah - Struktur Ekonomi - Sektor Primer  
Huruf setelah EPP : **ST** : Sangat Tinggi,  
**T** : Tinggi  
**SD** : Sedang  
**R** : Rendah  
**SR** : Sangat Rendah



Lampiran 4.2.3. Hasil Klasifikasi Indikator Faktor Tenaga Kerja dan Produktivitas

Lampiran 4.2.3. 1. Variabel Ketersediaan Tenaga Kerja

Lampiran 4.2.3.1.1. Indikator Penduduk Usia Produktif

| No. | Propinsi | Kabupaten/Kota          | Indikator Rasio Penduduk Usia Produktif thd Jumlah Penduduk |                             |                 |            |
|-----|----------|-------------------------|-------------------------------------------------------------|-----------------------------|-----------------|------------|
|     |          |                         | Jumlah Penduduk                                             | Usia Produktif (15 - 64 th) | Rasio (1) / (2) | Intensitas |
| 1   | Sumut    | Kab. Asahan             | 933,541                                                     | 544,152                     | 58.29           | TSPSK      |
| 2   | Sumut    | Kab. Dairi              | 306,676                                                     | 181,615                     | 59.22           | TSPSK      |
| 3   | Sumut    | Kab. Deli Serdang       | 1,944,055                                                   | 1,265,359                   | 65.09           | TSPC       |
| 4   | Sumut    | Kab. Langkat            | 889,739                                                     | 554,915                     | 62.37           | TSPK       |
| 5   | Sumut    | Kab. Simalungun         | 853,890                                                     | 528,975                     | 61.95           | TSPK       |
| 6   | Sumut    | Kota Binjai             | 212,098                                                     | 143,308                     | 67.57           | TSPB       |
| 7   | Sumut    | Kota Medan              | 1,893,686                                                   | 1,273,139                   | 67.23           | TSPB       |
| 8   | Sumut    | Kota Pematang Siantar   | 240,110                                                     | 150,954                     | 62.87           | TSPK       |
| 9   | Sumut    | Kota Sibolga            | 81,377                                                      | 50,461                      | 62.01           | TSPK       |
| 10  | Sumut    | Kota Tanjung Balai      | 131,159                                                     | 81,586                      | 62.20           | TSPK       |
| 11  | Sumut    | Kota Tebing Tinggi      | 124,814                                                     | 81,276                      | 65.12           | TSPC       |
| 12  | Sumbar   | Kab. Pesisir Selatan    | 388,153                                                     | 238,254                     | 61.38           | TSPSK      |
| 13  | Sumbar   | Kab. Sijunjung          | 306,817                                                     | 185,155                     | 60.35           | TSPSK      |
| 14  | Sumbar   | Kota Padang             | 708,369                                                     | 476,912                     | 67.33           | TSPB       |
| 15  | Sumbar   | Kota Sawah Lunto        | 48,616                                                      | 30,553                      | 62.85           | TSPK       |
| 16  | Riau     | Kab. Bengkalis          | 1,266,211                                                   | 824,078                     | 65.08           | TSPC       |
| 17  | Riau     | Kab. Indragiri Hilir    | 553,327                                                     | 358,332                     | 64.76           | TSPC       |
| 18  | Riau     | Kab. Kampar             | 849,648                                                     | 526,430                     | 61.96           | TSPK       |
| 19  | Riau     | Kota Batam              | 417,644                                                     | 292,275                     | 69.98           | TSPSB      |
| 20  | Riau     | Kota Pekanbaru          | 575,277                                                     | 399,716                     | 69.48           | TSPSB      |
| 21  | Jambi    | Kab. Batanghari         | 421,912                                                     | 267,555                     | 63.41           | TSPK       |
| 22  | Jambi    | Kab. Bungo              | 437,600                                                     | 266,301                     | 60.85           | TSPSK      |
| 23  | Jambi    | Kab. Kerinci            | 292,817                                                     | 197,106                     | 67.31           | TSPB       |
| 24  | Sumsel   | Kab. Muara Enim         | 712,914                                                     | 447,315                     | 62.74           | TSPK       |
| 25  | Sumsel   | Kab. Musi Banyu Asin    | 1,220,306                                                   | 728,741                     | 59.72           | TSPSK      |
| 26  | Sumsel   | Kab. Musi Rawas         | 632,923                                                     | 412,942                     | 65.24           | TSPC       |
| 27  | Sumsel   | Kab. Ogam Komiring Ilir | 961,346                                                     | 604,097                     | 62.84           | TSPK       |
| 28  | Sumsel   | Kota Palembang          | 1,430,600                                                   | 980,099                     | 68.51           | TSPSB      |
| 29  | Babel    | Kab. Bangka             | 616,298                                                     | 392,451                     | 63.68           | TSPC       |
| 30  | Babel    | Kota Pangkal Pinang     | 124,997                                                     | 81,573                      | 65.26           | TSPC       |
| 31  | Bengkulu | Kab. Bengkulu Selatan   | 358,384                                                     | 224,132                     | 62.54           | TSPK       |
| 32  | Bengkulu | Kota Bengkulu           | 229,252                                                     | 149,660                     | 65.28           | TSPC       |
| 33  | Lampung  | Kab. Lampung Barat      | 365,745                                                     | 221,732                     | 60.62           | TSPSK      |
| 34  | Lampung  | Kab. Lampung Selatan    | 1,130,246                                                   | 694,929                     | 61.48           | TSPSK      |
| 35  | Lampung  | Kab. Lampung Timur      | 2,339,482                                                   | 1,696,983                   | 72.54           | TSPSB      |
| 36  | Lampung  | Kota Bandar Lampung     | 728,082                                                     | 507,632                     | 69.72           | TSPSB      |
| 37  | Banten   | Kab. Lebak              | 1,021,577                                                   | 622,175                     | 60.90           | TSPSK      |
| 38  | Banten   | Kab. Serang             | 1,909,644                                                   | 1,165,687                   | 61.04           | TSPSK      |
| 39  | Banten   | Kab. Tangerang          | 2,736,224                                                   | 1,775,781                   | 64.90           | TSPC       |
| 40  | Banten   | Kota Tangerang          | 1,294,728                                                   | 901,119                     | 69.60           | TSPSB      |
| 41  | Jabar    | Kab. Bekasi             | 1,620,499                                                   | 1,056,135                   | 65.17           | TSPC       |
| 42  | Jabar    | Kab. Bogor              | 4,599,953                                                   | 2,993,967                   | 65.09           | TSPC       |
| 43  | Jabar    | Kab. Ciamis             | 1,595,062                                                   | 1,059,596                   | 66.43           | TSPB       |
| 44  | Jabar    | Kab. Cirebon            | 1,901,642                                                   | 1,246,642                   | 65.56           | TSPB       |
| 45  | Jabar    | Kab. Garut              | 2,031,730                                                   | 1,281,947                   | 63.10           | TSPK       |
| 46  | Jabar    | Kab. Indramayu          | 1,581,149                                                   | 1,019,648                   | 64.49           | TSPC       |
| 47  | Jabar    | Kab. Karawang           | 1,755,111                                                   | 1,219,493                   | 69.48           | TSPSB      |



| No. | Propinsi | Kabupaten/Kota      | Indikator Rasio Penduduk Usia Produktif thd Jumlah Penduduk |                             |                 |            |
|-----|----------|---------------------|-------------------------------------------------------------|-----------------------------|-----------------|------------|
|     |          |                     | Jumlah Penduduk                                             | Usia Produktif (15 - 64 th) | Rasio (1) / (2) | Intensitas |
| 48  | Jabar    | Kab. Kuningan       | 977,519                                                     | 642,365                     | 65.71           | TSPB       |
| 49  | Jabar    | Kab. Sukabumi       | 2,052,419                                                   | 1,305,906                   | 63.63           | TSPC       |
| 50  | Jabar    | Kab. Sumedang       | 962,180                                                     | 627,634                     | 65.23           | TSPC       |
| 51  | Jabar    | Kab. Tasik          | 2,041,236                                                   | 1,310,051                   | 64.18           | TSPC       |
| 52  | Jabar    | Kota Bekasi         | 1,610,435                                                   | 1,145,646                   | 71.14           | TSPSB      |
| 53  | Jabar    | Kota Bogor          | 738,824                                                     | 525,982                     | 71.19           | TSPSB      |
| 54  | Jabar    | Kota Cirebon        | 268,437                                                     | 186,659                     | 69.54           | TSPSB      |
| 55  | Jabar    | Kota Sukabumi       | 251,132                                                     | 172,847                     | 68.83           | TSPSB      |
| 56  | Jateng   | Kab. Kendal         | 845,370                                                     | 552,442                     | 65.35           | TSPC       |
| 57  | Jateng   | Kab. Magelang       | 1,092,776                                                   | 718,390                     | 65.74           | TSPB       |
| 58  | Jateng   | Kab. Pekalongan     | 795,044                                                     | 495,867                     | 62.37           | TSPK       |
| 59  | Jateng   | Kab. Pemalang       | 1,253,706                                                   | 794,132                     | 63.34           | TSPK       |
| 60  | Jateng   | Kab. Sukoharjo      | 768,752                                                     | 517,258                     | 67.29           | TSPB       |
| 61  | Jateng   | Kab. Tegal          | 1,374,382                                                   | 873,860                     | 63.58           | TSPC       |
| 62  | Jateng   | Kota Pekalongan     | 260,814                                                     | 170,557                     | 65.39           | TSPC       |
| 63  | Jateng   | Kota Semarang       | 1,341,730                                                   | 950,464                     | 70.84           | TSPSB      |
| 64  | Jateng   | Kota Tegal          | 236,038                                                     | 157,536                     | 66.74           | TSPB       |
| 65  | DIY      | Kota Yogyakarta     | 396,241                                                     | 289,572                     | 73.08           | TSPSB      |
| 66  | Jatim    | Kab. Bangkalan      | 795,888                                                     | 521,279                     | 65.50           | TSPB       |
| 67  | Jatim    | Kab. Banyuwangi     | 1,469,534                                                   | 1,012,120                   | 68.87           | TSPSB      |
| 68  | Jatim    | Kab. Blitar         | 1,055,666                                                   | 705,049                     | 66.79           | TSPB       |
| 69  | Jatim    | Kab. Kediri         | 1,397,543                                                   | 934,903                     | 66.90           | TSPB       |
| 70  | Jatim    | Kab. Magetan        | 612,181                                                     | 418,675                     | 68.39           | TSPB       |
| 71  | Jatim    | Kab. Mojokerto      | 900,112                                                     | 613,690                     | 68.18           | TSPB       |
| 72  | Jatim    | Kab. Pamekasan      | 686,788                                                     | 458,262                     | 66.73           | TSPB       |
| 73  | Jatim    | Kab. Pasuruan       | 1,347,987                                                   | 917,898                     | 68.09           | TSPB       |
| 74  | Jatim    | Kab. Sidoarjo       | 1,535,173                                                   | 1,082,012                   | 70.48           | TSPSB      |
| 75  | Jatim    | Kota Kediri         | 242,474                                                     | 168,150                     | 69.35           | TSPSB      |
| 76  | Jatim    | Kota Malang         | 748,031                                                     | 527,356                     | 70.50           | TSPSB      |
| 77  | Jatim    | Kota Mojokerto      | 108,855                                                     | 76,672                      | 70.43           | TSPSB      |
| 78  | Jatim    | Kota Probolinggo    | 192,050                                                     | 131,526                     | 68.49           | TSPB       |
| 79  | Jatim    | Kota Surabaya       | 2,585,508                                                   | 1,831,370                   | 70.83           | TSPSB      |
| 80  | Bali     | Kab. Badung         | 339,326                                                     | 245,143                     | 72.24           | TSPSB      |
| 81  | Bali     | Kab. Bangli         | 192,502                                                     | 131,589                     | 68.36           | TSPB       |
| 82  | Bali     | Kab. Buleleng       | 555,099                                                     | 370,322                     | 66.71           | TSPB       |
| 83  | Bali     | Kab. Gianyar        | 390,726                                                     | 280,469                     | 71.78           | TSPSB      |
| 84  | Bali     | Kab. Jembrana       | 231,572                                                     | 159,174                     | 68.74           | TSPSB      |
| 85  | Bali     | Kab. Tabanan        | 373,863                                                     | 259,012                     | 69.28           | TSPSB      |
| 86  | Bali     | Kota Denpasar       | 515,263                                                     | 377,523                     | 73.27           | TSPSB      |
| 87  | Kalbar   | Kab. Kapuas Hulu    | 181,989                                                     | 121,924                     | 67.00           | TSPB       |
| 88  | Kalbar   | Kab. Ketapang       | 421,350                                                     | 260,067                     | 61.72           | TSPK       |
| 89  | Kalbar   | Kab. Pontianak      | 905,732                                                     | 534,123                     | 58.97           | TSPSK      |
| 90  | Kalbar   | Kab. Sambas         | 785,512                                                     | 484,101                     | 61.63           | TSPK       |
| 91  | Kalbar   | Kab. Sanggau        | 499,648                                                     | 319,236                     | 63.89           | TSPC       |
| 92  | Kalteng  | Kab. Barito Selatan | 179,106                                                     | 115,910                     | 64.72           | TSPC       |
| 93  | Kalteng  | Kab. Barito Utara   | 181,647                                                     | 116,215                     | 63.98           | TSPC       |
| 94  | Kalteng  | Kab. Kapuas         | 509,480                                                     | 328,720                     | 64.52           | TSPC       |

| No. | Propinsi  | Kabupaten/Kota            | Indikator Rasio Penduduk Usia Produktif thd Jumlah Penduduk |                             |                 |            |
|-----|-----------|---------------------------|-------------------------------------------------------------|-----------------------------|-----------------|------------|
|     |           |                           | Jumlah Penduduk                                             | Usia Produktif (15 - 64 th) | Rasio (1) / (2) | Intensitas |
| 95  | Kalsel    | Kab. Hulu Sungai Selatan  | 193,608                                                     | 126,386                     | 65.28           | TSPC       |
| 96  | Kalsel    | Kab. Hulu Sungai Utara    | 223,136                                                     | 145,811                     | 65.35           | TSPC       |
| 97  | Kalsel    | Kab. Hulu Sungai Tengah   | 288,748                                                     | 183,879                     | 63.68           | TSPC       |
| 98  | Kalsel    | Kab. Tabalong             | 169,797                                                     | 111,794                     | 65.84           | TSPB       |
| 99  | Kalsel    | Kab. Tanah Laut           | 227,404                                                     | 148,342                     | 65.23           | TSPC       |
| 100 | Kalsel    | Kab. Tapin                | 140,550                                                     | 92,534                      | 65.84           | TSPB       |
| 101 | Kaltim    | Kab. Berau                | 114,923                                                     | 75,733                      | 65.90           | TSPB       |
| 102 | Kaltim    | Kab. Kutai                | 799,993                                                     | 513,915                     | 64.24           | TSPC       |
| 103 | Kaltim    | Kab. Pasir                | 265,685                                                     | 168,821                     | 63.54           | TSPC       |
| 104 | Kaltim    | Kota Balikpapan           | 404,863                                                     | 279,447                     | 69.02           | TSPSB      |
| 105 | Kaltim    | Kota Samarinda            | 517,714                                                     | 363,434                     | 70.20           | TSPSB      |
| 106 | Sulut     | Kab. Minahasa             | 765,859                                                     | 540,086                     | 70.52           | TSPSB      |
| 107 | Sulut     | Kab. Sangiatalaut         | 265,391                                                     | 173,022                     | 65.20           | TSPC       |
| 108 | Sulut     | Kota Bitung               | 145,848                                                     | 100,313                     | 68.78           | TSPSB      |
| 109 | Sulut     | Kota Manado               | 369,723                                                     | 264,375                     | 71.51           | TSPSB      |
| 110 | Gorontalo | Kab. Gorontalo            | 701,273                                                     | 453,800                     | 64.71           | TSPC       |
| 111 | Gorontalo | Kota Gorontalo            | 134,447                                                     | 90,675                      | 67.44           | TSPB       |
| 112 | Sulteng   | Kab. Banggai              | 407,928                                                     | 266,672                     | 65.37           | TSPC       |
| 113 | Sulteng   | Kab. Tolitoli             | 269,415                                                     | 173,055                     | 64.23           | TSPC       |
| 114 | Sulteng   | Kab. Donggala*)           | 721,306                                                     | 437,252                     | 60.62           | TSPSK      |
| 115 | Sulteng   | Kab. Morowali             | 158,477                                                     |                             |                 |            |
| 116 | Sulteng   | Kab. Poso*)               | 388,834                                                     | 241,494                     | 62.11           | TSPK       |
| 117 | Sultra    | Kab. Buton                | 528,299                                                     | 300,220                     | 56.83           | TSPSK      |
| 118 | Sultra    | Kab. Kolaka               | 318,343                                                     | 197,992                     | 62.19           | TSPK       |
| 119 | Sulsel    | Kab. Luwu                 | 826,185                                                     | 516,090                     | 62.47           | TSPK       |
| 120 | Sulsel    | Kab. Majene               | 119,992                                                     | 72,073                      | 60.06           | TSPSK      |
| 121 | Sulsel    | Kab. Pangkajene Kepulauan | 263,204                                                     | 167,350                     | 63.58           | TSPC       |
| 122 | Sulsel    | Kab. Pinrang              | 309,489                                                     | 192,425                     | 62.18           | TSPK       |
| 123 | Sulsel    | Kab. Tana Toraja          | 390,897                                                     | 220,094                     | 56.30           | TSPSK      |
| 124 | Sulsel    | Kota Parepare             | 107,783                                                     | 70,035                      | 64.98           | TSPC       |
| 125 | NTB       | Kab. Bima                 | 503,003                                                     | 295,691                     | 58.79           | TSPSK      |
| 126 | NTB       | Kab. Lombok Barat         | 660,371                                                     | 410,746                     | 62.20           | TSPK       |
| 127 | NTB       | Kota Mataram              | 313,538                                                     | 206,793                     | 65.95           | TSPB       |
| 128 | NTT       | Kab. Ende                 | 230,861                                                     | 139,373                     | 60.37           | TSPSK      |
| 129 | NTT       | Kab. Flores Timur         | 286,573                                                     | 172,934                     | 60.35           | TSPSK      |
| 130 | NTT       | Kab. Timor Tengah Selatan | 386,346                                                     | 235,446                     | 60.94           | TSPSK      |
| 131 | NTT       | Kab. Timor Tengah Utara   | 202,227                                                     | 121,857                     | 60.26           | TSPSK      |
| 132 | NTT       | Kota Kupang               | 233,342                                                     | 159,901                     | 68.53           | TSPSB      |
| 133 | Papua     | Kab. Fakfak               | 143,592                                                     | 88,586                      | 61.69           | TSPK       |
| 134 | Papua     | Kab. Manokwari            | 179,142                                                     | 107,531                     | 60.03           | TSPSK      |

Sumber : Susenaskor 2000 BPS, yang telah diolah

Rata-rata : 65.24  
Standev : 3.65

**Keterangan :**

**TSP** : Singkatan dari Tenaga Kerja - Ketersediaan - Usia Produktif

Huruf setelah TSP : **SB** : Sangat Banyak

**B** : Banyak

**C** : Cukup

**K** : Kurang

**SK** : Sangat Kurang



Lampiran 4.2.3.1.2.

Indikator Tenaga Kerja Berpengalaman Berpendidikan Minimal SLTP

| No. | Propinsi | Kabupaten/Kota          | Indikator Rasio Tenaga Kerja Berpendidikan Minimal SLTP terhadap Jumlah Seluruh Tenaga Kerja |                           |       |            |
|-----|----------|-------------------------|----------------------------------------------------------------------------------------------|---------------------------|-------|------------|
|     |          |                         | Jumlah TK Seluruh                                                                            | Tenaga Kerja Minimal SLTP | Rasio | Intensitas |
| 1   | Sumut    | Kab. Asahan             | 383,734                                                                                      | 130,963                   | 34.13 | TSSC       |
| 2   | Sumut    | Kab. Dairi              | 170,606                                                                                      | 82,527                    | 48.37 | TSSB       |
| 3   | Sumut    | Kab. Deli Serdang       | 764,336                                                                                      | 362,175                   | 47.38 | TSSB       |
| 4   | Sumut    | Kab. Langkat            | 322,122                                                                                      | 120,170                   | 37.31 | TSSC       |
| 5   | Sumut    | Kab. Simalungun         | 361,434                                                                                      | 154,885                   | 42.85 | TSSC       |
| 6   | Sumut    | Kota Binjai             | 72,109                                                                                       | 47,552                    | 65.94 | TSSSB      |
| 7   | Sumut    | Kota Medan              | 662,842                                                                                      | 515,731                   | 77.81 | TSSSB      |
| 8   | Sumut    | Kota Pematang Siantar   | 79,985                                                                                       | 55,929                    | 69.92 | TSSSB      |
| 9   | Sumut    | Kota Sibolga            | 25,683                                                                                       | 16,150                    | 62.88 | TSSSB      |
| 10  | Sumut    | Kota Tanjung Balai      | 46,844                                                                                       | 23,417                    | 49.99 | TSSB       |
| 11  | Sumut    | Kota Tebing Tinggi      | 42,037                                                                                       | 26,438                    | 62.89 | TSSSB      |
| 12  | Sumbar   | Kab. Pesisir Selatan    | 126,136                                                                                      | 48,646                    | 38.57 | TSSC       |
| 13  | Sumbar   | Kab. Sijunjung          | 137,057                                                                                      | 39,543                    | 28.85 | TSSK       |
| 14  | Sumbar   | Kota Padang             | 225,486                                                                                      | 151,340                   | 67.12 | TSSSB      |
| 15  | Sumbar   | Kota Sawah Lunto        | 19,713                                                                                       | 9,800                     | 49.71 | TSSB       |
| 16  | Riau     | Kab. Bengkalis          | 450,464                                                                                      | 194,426                   | 43.16 | TSSC       |
| 17  | Riau     | Kab. Indragiri Hilir    | 220,306                                                                                      | 71,115                    | 32.28 | TSSC       |
| 18  | Riau     | Kab. Kampar             | 325,616                                                                                      | 110,287                   | 33.87 | TSSC       |
| 19  | Riau     | Kota Batam              | 192,387                                                                                      | 132,002                   | 68.61 | TSSSB      |
| 20  | Riau     | Kota Pekanbaru          | 191,683                                                                                      | 151,710                   | 79.15 | TSSSB      |
| 21  | Jambi    | Kab. Batanghari         | 158,531                                                                                      | 52,645                    | 33.21 | TSSC       |
| 22  | Jambi    | Kab. Bungo              | 165,253                                                                                      | 48,524                    | 29.36 | TSSK       |
| 23  | Jambi    | Kab. Kerinci            | 143,949                                                                                      | 49,309                    | 34.25 | TSSC       |
| 24  | Sumsel   | Kab. Muara Enim         | 281,183                                                                                      | 88,846                    | 31.60 | TSSC       |
| 25  | Sumsel   | Kab. Musi Banyu Asin    | 520,331                                                                                      | 152,963                   | 29.40 | TSSK       |
| 26  | Sumsel   | Kab. Musi Rawas         | 278,333                                                                                      | 70,150                    | 25.20 | TSSK       |
| 27  | Sumsel   | Kab. Ogan Komering Ilir | 421,537                                                                                      | 84,204                    | 19.98 | TSSSK      |
| 28  | Sumsel   | Kota Palembang          | 462,117                                                                                      | 291,802                   | 63.14 | TSSSB      |
| 29  | Babel    | Kab. Bangka             | 281,799                                                                                      | 67,580                    | 23.98 | TSSK       |
| 30  | Babel    | Kota Pangkal Pinang     | 46,282                                                                                       | 24,685                    | 53.34 | TSSB       |
| 31  | Bengkulu | Kab. Bengkulu Selatan   | 182,295                                                                                      | 56,313                    | 30.89 | TSSK       |
| 32  | Bengkulu | Kota Bengkulu           | 77,145                                                                                       | 55,753                    | 72.27 | TSSSB      |
| 33  | Lampung  | Kab. Lampung Barat      | 160,897                                                                                      | 42,542                    | 26.44 | TSSK       |
| 34  | Lampung  | Kab. Lampung Selatan    | 469,603                                                                                      | 105,800                   | 22.53 | TSSK       |
| 35  | Lampung  | Kab. Lampung Timur      | 865,828                                                                                      | 650,863                   | 75.17 | TSSSB      |
| 36  | Lampung  | Kota Bandar Lampung     | 255,873                                                                                      | 169,577                   | 66.27 | TSSSB      |
| 37  | Banten   | Kab. Lebak              | 366,610                                                                                      | 65,989                    | 18.00 | TSSSK      |
| 38  | Banten   | Kab. Serang             | 652,391                                                                                      | 232,604                   | 35.65 | TSSC       |
| 39  | Banten   | Kab. Tangerang          | 936,046                                                                                      | 477,988                   | 51.06 | TSSB       |
| 40  | Banten   | Kota Tangerang          | 466,298                                                                                      | 317,650                   | 68.12 | TSSSB      |
| 41  | Jabar    | Kab. Bekasi             | 565,048                                                                                      | 193,245                   | 34.20 | TSSC       |
| 42  | Jabar    | Kab. Bogor              | 1,619,535                                                                                    | 687,728                   | 42.46 | TSSC       |
| 43  | Jabar    | Kab. Ciamis             | 709,396                                                                                      | 181,484                   | 25.58 | TSSK       |
| 44  | Jabar    | Kab. Cirebon            | 729,180                                                                                      | 191,051                   | 26.20 | TSSK       |
| 45  | Jabar    | Kab. Garut              | 700,012                                                                                      | 199,071                   | 28.44 | TSSK       |
| 46  | Jabar    | Kab. Indramayu          | 636,116                                                                                      | 126,723                   | 19.92 | TSSSK      |
| 47  | Jabar    | Kab. Karawang           | 654,253                                                                                      | 202,851                   | 31.00 | TSSC       |

| No. | Propinsi | Kabupaten/Kota      | Indikator Rasio Tenaga Kerja Berpendidikan Minimal SLTP terhadap Jumlah Seluruh Tenaga Kerja |                           |       |            |
|-----|----------|---------------------|----------------------------------------------------------------------------------------------|---------------------------|-------|------------|
|     |          |                     | Jumlah TK Seluruh                                                                            | Tenaga Kerja Minimal SLTP | Rasio | Intensitas |
| 48  | Jabar    | Kab. Kuningan       | 400,813                                                                                      | 77,523                    | 19.34 | TSSSK      |
| 49  | Jabar    | Kab. Sukabumi       | 810,575                                                                                      | 148,694                   | 18.34 | TSSSK      |
| 50  | Jabar    | Kab. Sumedang       | 388,520                                                                                      | 110,245                   | 28.38 | TSSK       |
| 51  | Jabar    | Kab. Tasik          | 839,559                                                                                      | 177,420                   | 21.13 | TSSSK      |
| 52  | Jabar    | Kota Bekasi         | 586,155                                                                                      | 412,062                   | 70.30 | TSSSB      |
| 53  | Jabar    | Kota Bogor          | 258,725                                                                                      | 175,330                   | 67.77 | TSSSB      |
| 54  | Jabar    | Kota Cirebon        | 101,758                                                                                      | 63,890                    | 62.79 | TSSSB      |
| 55  | Jabar    | Kota Sukabumi       | 80,279                                                                                       | 47,839                    | 59.59 | TSSSB      |
| 56  | Jateng   | Kab. Kendal         | 364,453                                                                                      | 103,319                   | 28.35 | TSSK       |
| 57  | Jateng   | Kab. Magelang       | 584,440                                                                                      | 155,012                   | 26.52 | TSSK       |
| 58  | Jateng   | Kab. Pekalongan     | 355,845                                                                                      | 83,603                    | 23.49 | TSSK       |
| 59  | Jateng   | Kab. Pemalang       | 520,240                                                                                      | 98,712                    | 18.97 | TSSSK      |
| 60  | Jateng   | Kab. Sukoharjo      | 362,908                                                                                      | 168,937                   | 46.55 | TSSB       |
| 61  | Jateng   | Kab. Tegal          | 576,657                                                                                      | 120,680                   | 20.93 | TSSSK      |
| 62  | Jateng   | Kota Pekalongan     | 105,300                                                                                      | 39,397                    | 37.41 | TSSC       |
| 63  | Jateng   | Kota Semarang       | 583,896                                                                                      | 353,995                   | 60.63 | TSSSB      |
| 64  | Jateng   | Kota Tegal          | 90,614                                                                                       | 43,757                    | 48.29 | TSSB       |
| 65  | DIY      | Kota Yogyakarta     | 160,267                                                                                      | 116,559                   | 72.73 | TSSSB      |
| 66  | Jatim    | Kab. Bangkalan      | 383,707                                                                                      | 46,880                    | 12.22 | TSSSK      |
| 67  | Jatim    | Kab. Banyuwangi     | 737,881                                                                                      | 201,662                   | 27.33 | TSSK       |
| 68  | Jatim    | Kab. Blitar         | 499,826                                                                                      | 132,729                   | 26.56 | TSSK       |
| 69  | Jatim    | Kab. Kediri         | 606,897                                                                                      | 187,741                   | 30.93 | TSSK       |
| 70  | Jatim    | Kab. Magetan        | 290,058                                                                                      | 106,476                   | 36.71 | TSSC       |
| 71  | Jatim    | Kab. Mojokerto      | 418,717                                                                                      | 138,990                   | 33.19 | TSSC       |
| 72  | Jatim    | Kab. Pamekasan      | 344,296                                                                                      | 54,619                    | 15.86 | TSSSK      |
| 73  | Jatim    | Kab. Pasuruan       | 676,495                                                                                      | 163,226                   | 24.13 | TSSK       |
| 74  | Jatim    | Kab. Sidoarjo       | 703,674                                                                                      | 453,600                   | 64.46 | TSSSB      |
| 75  | Jatim    | Kota Kediri         | 98,856                                                                                       | 54,178                    | 54.80 | TSSB       |
| 76  | Jatim    | Kota Malang         | 299,826                                                                                      | 196,055                   | 65.39 | TSSSB      |
| 77  | Jatim    | Kota Mojokerto      | 45,711                                                                                       | 27,226                    | 59.56 | TSSSB      |
| 78  | Jatim    | Kota Probolinggo    | 75,064                                                                                       | 36,243                    | 48.28 | TSSB       |
| 79  | Jatim    | Kota Surabaya       | 1,070,994                                                                                    | 738,220                   | 68.93 | TSSSB      |
| 80  | Bali     | Kab. Badung         | 171,955                                                                                      | 107,584                   | 62.57 | TSSSB      |
| 81  | Bali     | Kab. Bangli         | 123,029                                                                                      | 35,409                    | 28.78 | TSSK       |
| 82  | Bali     | Kab. Buleleng       | 291,563                                                                                      | 93,201                    | 31.97 | TSSC       |
| 83  | Bali     | Kab. Gianyar        | 226,662                                                                                      | 115,118                   | 50.79 | TSSB       |
| 84  | Bali     | Kab. Jembrana       | 131,597                                                                                      | 40,917                    | 31.09 | TSSC       |
| 85  | Bali     | Kab. Tabanan        | 203,153                                                                                      | 78,060                    | 38.42 | TSSC       |
| 86  | Bali     | Kota Denpasar       | 268,138                                                                                      | 188,415                   | 70.27 | TSSSB      |
| 87  | Kalbar   | Kab. Kapuas Hulu    | 98,973                                                                                       | 36,250                    | 36.63 | TSSC       |
| 88  | Kalbar   | Kab. Ketapang       | 188,134                                                                                      | 47,227                    | 25.10 | TSSK       |
| 89  | Kalbar   | Kab. Pontianak      | 396,796                                                                                      | 103,359                   | 26.05 | TSSK       |
| 90  | Kalbar   | Kab. Sambas         | 368,896                                                                                      | 90,721                    | 24.59 | TSSK       |
| 91  | Kalbar   | Kab. Sanggau        | 245,334                                                                                      | 58,672                    | 23.92 | TSSK       |
| 92  | Kalteng  | Kab. Barito Selatan | 93,559                                                                                       | 37,109                    | 39.66 | TSSC       |
| 93  | Kalteng  | Kab. Barito Utara   | 81,392                                                                                       | 27,140                    | 33.34 | TSSC       |
| 94  | Kalteng  | Kab. Kapuas         | 247,833                                                                                      | 95,691                    | 38.61 | TSSC       |



| No. | Propinsi  | Kabupaten/Kota            | Indikator Rasio Tenaga Kerja Berpendidikan Minimal SLTP terhadap Jumlah Seluruh Tenaga Kerja |                           |       |            |
|-----|-----------|---------------------------|----------------------------------------------------------------------------------------------|---------------------------|-------|------------|
|     |           |                           | Jumlah TK Seluruh                                                                            | Tenaga Kerja Minimal SLTP | Rasio | Intensitas |
| 95  | Kalsel    | Kab. Hulu Sungai Selatan  | 97,811                                                                                       | 29,062                    | 29.71 | TSSK       |
| 96  | Kalsel    | Kab. Hulu Sungai Utara    | 123,237                                                                                      | 29,861                    | 24.23 | TSSK       |
| 97  | Kalsel    | Kab. Hulu Sungai Tengah   | 140,020                                                                                      | 29,376                    | 20.98 | TSSSK      |
| 98  | Kalsel    | Kab. Tabalong             | 85,177                                                                                       | 29,462                    | 34.59 | TSSC       |
| 99  | Kalsel    | Kab. Tanah Laut           | 107,519                                                                                      | 30,100                    | 28.00 | TSSK       |
| 100 | Kalsel    | Kab. Tapin                | 77,829                                                                                       | 16,703                    | 21.46 | TSSSK      |
| 101 | Kaltim    | Kab. Berau                | 54,159                                                                                       | 20,642                    | 38.11 | TSSC       |
| 102 | Kaltim    | Kab. Kutai                | 348,581                                                                                      | 129,770                   | 37.23 | TSSC       |
| 103 | Kaltim    | Kab. Pasir                | 109,892                                                                                      | 32,807                    | 29.85 | TSSK       |
| 104 | Kaltim    | Kota Balikpapan           | 153,799                                                                                      | 108,423                   | 70.50 | TSSSB      |
| 105 | Kaltim    | Kota Samarinda            | 225,853                                                                                      | 134,749                   | 59.66 | TSSSB      |
| 106 | Sulut     | Kab. Minahasa             | 341,323                                                                                      | 161,018                   | 47.17 | TSSB       |
| 107 | Sulut     | Kab. Sangietalaut         | 109,084                                                                                      | 42,470                    | 38.93 | TSSC       |
| 108 | Sulut     | Kota Bitung               | 56,393                                                                                       | 35,074                    | 62.20 | TSSSB      |
| 109 | Sulut     | Kota Manado               | 128,904                                                                                      | 102,571                   | 79.57 | TSSSB      |
| 110 | Gorontalo | Kab. Gorontalo            | 255,639                                                                                      | 61,811                    | 24.18 | TSSK       |
| 111 | Gorontalo | Kota Gorontalo            | 41,971                                                                                       | 22,661                    | 53.99 | TSSB       |
| 112 | Sulteng   | Kab. Banggai              | 185,477                                                                                      | 58,981                    | 31.80 | TSSC       |
| 113 | Sulteng   | Kab. Tolitoli             | 101,823                                                                                      | 37,129                    | 36.46 | TSSC       |
| 114 | Sulteng   | Kab. Donggala*)           | 307,371                                                                                      | 75,375                    | 24.52 | TSSK       |
| 115 | Sulteng   | Kab. Morowali             |                                                                                              |                           |       |            |
| 116 | Sulteng   | Kab. Poso*)               | 180,232                                                                                      | 63,433                    | 35.20 | TSSC       |
| 117 | Sultra    | Kab. Buton                | 204,384                                                                                      | 68,339                    | 33.44 | TSSC       |
| 118 | Sultra    | Kab. Kolaka               | 120,881                                                                                      | 52,384                    | 43.34 | TSSC       |
| 119 | Sulsel    | Kab. Luwu                 | 304,939                                                                                      | 129,444                   | 42.45 | TSSC       |
| 120 | Sulsel    | Kab. Majene               | 38,853                                                                                       | 14,201                    | 36.55 | TSSC       |
| 121 | Sulsel    | Kab. Pangkajene Kepulauan | 84,596                                                                                       | 23,695                    | 28.01 | TSSK       |
| 122 | Sulsel    | Kab. Pinrang              | 108,794                                                                                      | 36,831                    | 33.85 | TSSC       |
| 123 | Sulsel    | Kab. Tana Toraja          | 158,744                                                                                      | 60,039                    | 37.82 | TSSC       |
| 124 | Sulsel    | Kota Parepare             | 33,887                                                                                       | 21,056                    | 62.14 | TSSSB      |
| 125 | NTB       | Kab. Bima                 | 206,641                                                                                      | 64,540                    | 31.23 | TSSC       |
| 126 | NTB       | Kab. Lombok Barat         | 281,736                                                                                      | 60,912                    | 21.62 | TSSSK      |
| 127 | NTB       | Kota Mataram              | 108,673                                                                                      | 54,141                    | 49.82 | TSSB       |
| 128 | NTT       | Kab. Ende                 | 124,368                                                                                      | 25,956                    | 20.87 | TSSSK      |
| 129 | NTT       | Kab. Flores Timur         | 142,961                                                                                      | 25,655                    | 17.95 | TSSSK      |
| 130 | NTT       | Kab. Timor Tengah Selatan | 174,568                                                                                      | 25,780                    | 14.77 | TSSSK      |
| 131 | NTT       | Kab. Timor Tengah Utara   | 104,258                                                                                      | 14,953                    | 14.34 | TSSSK      |
| 132 | NTT       | Kota Kupang               | 74,884                                                                                       | 54,226                    | 72.41 | TSSSB      |
| 133 | Papua     | Kab. Fakfak               | 56,025                                                                                       | 19,284                    | 34.42 | TSSC       |
| 134 | Papua     | Kab. Manokwari            | 89,520                                                                                       | 20,830                    | 23.27 | TSSK       |

Sumber : Susenaskor 2000 BPS, yang telah diolah

Rata-rata : 40.35  
Standev : 17.55

**Keterangan :**

**TSS** : Singkatan dari Tenaga Kerja - Ketersediaan - Tenaga Kerja Berpengalaman Pendidikan SLTP

Huruf setelah TSS : **SB** : Sangat Banyak

**B** : Banyak

**C** : Cukup

**K** : Kurang

**SK** : Sangat Kurang



Lampiran 4.2.3.1.3.  
Indikator Pencari Kerja

| No. | Propinsi | Kabupaten/Kota          | Indikator Rasio Pencari Kerja terhadap Angkatan Kerja |               |                |       |            |
|-----|----------|-------------------------|-------------------------------------------------------|---------------|----------------|-------|------------|
|     |          |                         | Penduduk Bekerja                                      | Pencari Kerja | Angkatan Kerja | Rasio | Intensitas |
| 1   | Sumut    | Kab. Asahan             | 383,734                                               | 1,384         | 385,118        | 0.36  | TSCSK      |
| 2   | Sumut    | Kab. Dairi              | 170,606                                               | 2,927         | 173,533        | 1.69  | TSCK       |
| 3   | Sumut    | Kab. Deli Serdang       | 764,336                                               | 46,090        | 810,426        | 5.69  | TSCC       |
| 4   | Sumut    | Kab. Langkat            | 322,122                                               | 4,492         | 326,614        | 1.38  | TSCSK      |
| 5   | Sumut    | Kab. Simalungun         | 361,434                                               | 14,624        | 376,058        | 3.89  | TSCC       |
| 6   | Sumut    | Kota Binjai             | 72,109                                                | 8,676         | 80,785         | 10.74 | TSCSB      |
| 7   | Sumut    | Kota Medan              | 662,842                                               | 68,634        | 731,476        | 9.38  | TSCSB      |
| 8   | Sumut    | Kota Pematang Siantar   | 79,985                                                | 712           | 80,697         | 0.88  | TSCSK      |
| 9   | Sumut    | Kota Sibolga            | 25,683                                                | 2,298         | 27,981         | 8.21  | TSCSB      |
| 10  | Sumut    | Kota Tanjung Balai      | 46,844                                                | 4,353         | 51,197         | 8.50  | TSCSB      |
| 11  | Sumut    | Kota Tebing Tinggi      | 42,037                                                | 4,955         | 46,992         | 10.54 | TSCSB      |
| 12  | Sumbar   | Kab. Pesisir Selatan    | 126,136                                               | 4,812         | 130,948        | 3.67  | TSCC       |
| 13  | Sumbar   | Kab. Sijunjung          | 137,057                                               | 1,328         | 138,385        | 0.96  | TSCSK      |
| 14  | Sumbar   | Kota Padang             | 225,486                                               | 26,325        | 251,811        | 10.45 | TSCSB      |
| 15  | Sumbar   | Kota Sawah Lunto        | 19,713                                                | 477           | 20,190         | 2.36  | TSCK       |
| 16  | Riau     | Kab. Bengkalis          | 450,464                                               | 31,732        | 482,196        | 6.58  | TSCB       |
| 17  | Riau     | Kab. Indragiri Hilir    | 220,306                                               | 4,951         | 225,257        | 2.20  | TSCK       |
| 18  | Riau     | Kab. Kampar             | 325,616                                               | 7,532         | 333,148        | 2.26  | TSCK       |
| 19  | Riau     | Kota Batam              | 192,387                                               | 11,776        | 204,163        | 5.77  | TSCC       |
| 20  | Riau     | Kota Pekanbaru          | 191,683                                               | 33,088        | 224,771        | 14.72 | TSCSB      |
| 21  | Jambi    | Kab. Batanghari         | 158,531                                               | 7,754         | 166,285        | 4.66  | TSCC       |
| 22  | Jambi    | Kab. Bungo              | 165,253                                               | 3,386         | 168,639        | 2.01  | TSCK       |
| 23  | Jambi    | Kab. Kerinci            | 143,949                                               | 2,434         | 146,383        | 1.66  | TSCK       |
| 24  | Sumsel   | Kab. Muara Enim         | 281,183                                               | 8,747         | 289,930        | 3.02  | TSCC       |
| 25  | Sumsel   | Kab. Musi Banyu Asin    | 520,331                                               | 6,867         | 527,198        | 1.30  | TSCSK      |
| 26  | Sumsel   | Kab. Musi Rawas         | 278,333                                               | 4,224         | 282,557        | 1.49  | TSCK       |
| 27  | Sumsel   | Kab. Ogan Komering Ilir | 421,537                                               | 11,370        | 432,907        | 2.63  | TSCK       |
| 28  | Sumsel   | Kota Palembang          | 462,117                                               | 41,772        | 503,889        | 8.29  | TSCSB      |
| 29  | Babel    | Kab. Bangka             | 281,799                                               | 3,041         | 284,840        | 1.07  | TSCSK      |
| 30  | Babel    | Kota Pangkal Pinang     | 46,282                                                | 1,721         | 48,003         | 3.59  | TSCC       |
| 31  | Bengkulu | Kab. Bengkulu Selatan   | 182,295                                               | 1,973         | 184,268        | 1.07  | TSCSK      |
| 32  | Bengkulu | Kota Bengkulu           | 77,145                                                | 4,247         | 81,392         | 5.22  | TSCC       |
| 33  | Lampung  | Kab. Lampung Barat      | 160,897                                               | 393           | 161,290        | 0.24  | TSCSK      |
| 34  | Lampung  | Kab. Lampung Selatan    | 469,603                                               | 8,413         | 478,016        | 1.76  | TSCK       |
| 35  | Lampung  | Kab. Lampung Timur      | 865,828                                               | 107,226       | 973,054        | 11.02 | TSCSB      |
| 36  | Lampung  | Kota Bandar Lampung     | 255,873                                               | 34,117        | 289,990        | 11.76 | TSCSB      |
| 37  | Banten   | Kab. Lebak              | 366,610                                               | 23,428        | 390,038        | 6.01  | TSCB       |
| 38  | Banten   | Kab. Serang             | 652,391                                               | 58,449        | 710,840        | 8.22  | TSCSB      |
| 39  | Banten   | Kab. Tangerang          | 936,046                                               | 87,810        | 1,023,856      | 8.58  | TSCSB      |
| 40  | Banten   | Kota Tangerang          | 466,298                                               | 73,637        | 539,935        | 13.64 | TSCSB      |
| 41  | Jabar    | Kab. Bekasi             | 565,048                                               | 25,532        | 590,580        | 4.32  | TSCC       |
| 42  | Jabar    | Kab. Bogor              | 1,619,535                                             | 148,140       | 1,767,675      | 8.38  | TSCSB      |
| 43  | Jabar    | Kab. Ciamis             | 709,396                                               | 22,302        | 731,698        | 3.05  | TSCC       |
| 44  | Jabar    | Kab. Cirebon            | 729,180                                               | 56,590        | 785,770        | 7.20  | TSCB       |
| 45  | Jabar    | Kab. Garut              | 700,012                                               | 72,489        | 772,501        | 9.38  | TSCSB      |
| 46  | Jabar    | Kab. Indramayu          | 636,116                                               | 28,616        | 664,732        | 4.30  | TSCC       |
| 47  | Jabar    | Kab. Karawang           | 654,253                                               | 57,374        | 711,627        | 8.06  | TSCSB      |

| No. | Propinsi | Kabupaten/Kota      | Indikator Rasio Pencari Kerja terhadap Angkatan Kerja |               |                |       |            |
|-----|----------|---------------------|-------------------------------------------------------|---------------|----------------|-------|------------|
|     |          |                     | Penduduk Bekerja                                      | Pencari Kerja | Angkatan Kerja | Rasio | Intensitas |
| 48  | Jabar    | Kab. Kuningan       | 400,813                                               | 30,046        | 430,859        | 6.97  | TSCB       |
| 49  | Jabar    | Kab. Sukabumi       | 810,575                                               | 33,129        | 843,704        | 3.93  | TSCC       |
| 50  | Jabar    | Kab. Sumedang       | 388,520                                               | 23,761        | 412,281        | 5.76  | TSCC       |
| 51  | Jabar    | Kab. Tasik          | 839,559                                               | 43,909        | 883,468        | 4.97  | TSCC       |
| 52  | Jabar    | Kota Bekasi         | 586,155                                               | 66,004        | 652,159        | 10.12 | TSCSB      |
| 53  | Jabar    | Kota Bogor          | 258,725                                               | 26,786        | 285,511        | 9.38  | TSCSB      |
| 54  | Jabar    | Kota Cirebon        | 101,758                                               | 5,696         | 107,454        | 5.30  | TSCC       |
| 55  | Jabar    | Kota Sukabumi       | 80,279                                                | 12,351        | 92,630         | 13.33 | TSCSB      |
| 56  | Jateng   | Kab. Kendal         | 364,453                                               | 19,514        | 383,967        | 5.08  | TSCC       |
| 57  | Jateng   | Kab. Magelang       | 584,440                                               | 11,911        | 596,351        | 2.00  | TSCK       |
| 58  | Jateng   | Kab. Pekalongan     | 355,845                                               | 16,631        | 372,476        | 4.46  | TSCC       |
| 59  | Jateng   | Kab. Pemalang       | 520,240                                               | 45,384        | 565,624        | 8.02  | TSCSB      |
| 60  | Jateng   | Kab. Sukoharjo      | 362,908                                               | 23,362        | 386,270        | 6.05  | TSCB       |
| 61  | Jateng   | Kab. Tegal          | 576,657                                               | 38,425        | 615,082        | 6.25  | TSCB       |
| 62  | Jateng   | Kota Pekalongan     | 105,300                                               | 6,120         | 111,420        | 5.49  | TSCC       |
| 63  | Jateng   | Kota Semarang       | 583,896                                               | 47,346        | 631,242        | 7.50  | TSCSB      |
| 64  | Jateng   | Kota Tegal          | 90,614                                                | 8,805         | 99,419         | 8.86  | TSCSB      |
| 65  | DIY      | Kota Yogyakarta     | 160,267                                               | 12,750        | 173,017        | 7.37  | TSCB       |
| 66  | Jatim    | Kab. Bangkalan      | 383,707                                               | 9,168         | 392,875        | 2.33  | TSCK       |
| 67  | Jatim    | Kab. Banyuwangi     | 737,881                                               | 11,439        | 749,320        | 1.53  | TSCK       |
| 68  | Jatim    | Kab. Blitar         | 499,826                                               | 13,974        | 513,800        | 2.72  | TSCK       |
| 69  | Jatim    | Kab. Kediri         | 606,897                                               | 21,808        | 628,705        | 3.47  | TSCC       |
| 70  | Jatim    | Kab. Magetan        | 290,058                                               | 12,803        | 302,861        | 4.23  | TSCC       |
| 71  | Jatim    | Kab. Mojokerto      | 418,717                                               | 15,910        | 434,627        | 3.66  | TSCC       |
| 72  | Jatim    | Kab. Pamekasan      | 344,296                                               | 6,323         | 350,619        | 1.80  | TSCK       |
| 73  | Jatim    | Kab. Pasuruan       | 676,495                                               | 24,642        | 701,137        | 3.51  | TSCC       |
| 74  | Jatim    | Kab. Sidoarjo       | 703,674                                               | 29,062        | 732,736        | 3.97  | TSCC       |
| 75  | Jatim    | Kota Kediri         | 98,856                                                | 6,757         | 105,613        | 6.40  | TSCB       |
| 76  | Jatim    | Kota Malang         | 299,826                                               | 26,546        | 326,372        | 8.13  | TSCSB      |
| 77  | Jatim    | Kota Mojokerto      | 45,711                                                | 3,344         | 49,055         | 6.82  | TSCB       |
| 78  | Jatim    | Kota Probolinggo    | 75,064                                                | 3,306         | 78,370         | 4.22  | TSCC       |
| 79  | Jatim    | Kota Surabaya       | 1,070,994                                             | 53,944        | 1,124,938      | 4.80  | TSCC       |
| 80  | Bali     | Kab. Badung         | 171,955                                               | 4,799         | 176,754        | 2.72  | TSCK       |
| 81  | Bali     | Kab. Bangli         | 123,029                                               | 1,135         | 124,164        | 0.91  | TSCSK      |
| 82  | Bali     | Kab. Buleleng       | 291,563                                               | 6,744         | 298,307        | 2.26  | TSCK       |
| 83  | Bali     | Kab. Gianyar        | 226,662                                               | 3,378         | 230,040        | 1.47  | TSCSK      |
| 84  | Bali     | Kab. Jembrana       | 131,597                                               | 4,129         | 135,726        | 3.04  | TSCC       |
| 85  | Bali     | Kab. Tabanan        | 203,153                                               | 5,457         | 208,610        | 2.62  | TSCK       |
| 86  | Bali     | Kota Denpasar       | 268,138                                               | 8,234         | 276,372        | 2.98  | TSCK       |
| 87  | Kalbar   | Kab. Kapuas Hulu    | 98,973                                                | 2,501         | 101,474        | 2.46  | TSCK       |
| 88  | Kalbar   | Kab. Ketapang       | 188,134                                               | 3,981         | 192,115        | 2.07  | TSCK       |
| 89  | Kalbar   | Kab. Pontianak      | 396,796                                               | 7,186         | 403,982        | 1.78  | TSCK       |
| 90  | Kalbar   | Kab. Sambas         | 368,896                                               | 13,709        | 382,605        | 3.58  | TSCC       |
| 91  | Kalbar   | Kab. Sanggau        | 245,334                                               | 2,827         | 248,161        | 1.14  | TSCSK      |
| 92  | Kalteng  | Kab. Barito Selatan | 93,559                                                | 673           | 94,232         | 0.71  | TSCSK      |
| 93  | Kalteng  | Kab. Barito Utara   | 81,392                                                | 1,016         | 82,408         | 1.23  | TSCSK      |
| 94  | Kalteng  | Kab. Kapuas         | 247,833                                               | 5,778         | 253,611        | 2.28  | TSCK       |

| No. | Propinsi  | Kabupaten/Kota            | Indikator Rasio Pencari Kerja terhadap Angkatan Kerja |               |                |       |            |
|-----|-----------|---------------------------|-------------------------------------------------------|---------------|----------------|-------|------------|
|     |           |                           | Penduduk Bekerja                                      | Pencari Kerja | Angkatan Kerja | Rasio | Intensitas |
| 95  | Kalsel    | Kab. Hulu Sungai Selatan  | 97,811                                                | 3,542         | 101,353        | 3.49  | TSCC       |
| 96  | Kalsel    | Kab. Hulu Sungai Utara    | 123,237                                               | 1,616         | 124,853        | 1.29  | TSCSK      |
| 97  | Kalsel    | Kab. Hulu Sungai Tengah   | 140,020                                               | 1,484         | 141,504        | 1.05  | TSCSK      |
| 98  | Kalsel    | Kab. Tabalong             | 85,177                                                | 1,070         | 86,247         | 1.24  | TSCSK      |
| 99  | Kalsel    | Kab. Tanah Laut           | 107,519                                               | 1,682         | 109,201        | 1.54  | TSCK       |
| 100 | Kalsel    | Kab. Tapin                | 77,829                                                | 2,147         | 79,976         | 2.68  | TSCK       |
| 101 | Kaltim    | Kab. Berau                | 54,159                                                | 2,393         | 56,552         | 4.23  | TSCC       |
| 102 | Kaltim    | Kab. Kutai                | 348,581                                               | 11,857        | 360,438        | 3.29  | TSCC       |
| 103 | Kaltim    | Kab. Pasir                | 109,892                                               | 1,760         | 111,652        | 1.58  | TSCK       |
| 104 | Kaltim    | Kota Balikpapan           | 153,799                                               | 17,348        | 171,147        | 10.14 | TSCSB      |
| 105 | Kaltim    | Kota Samarinda            | 225,853                                               | 8,191         | 234,044        | 3.50  | TSCC       |
| 106 | Sulut     | Kab. Minahasa             | 341,323                                               | 16,283        | 357,606        | 4.55  | TSCC       |
| 107 | Sulut     | Kab. Sangiatalaut         | 109,084                                               | 2,861         | 111,945        | 2.56  | TSCK       |
| 108 | Sulut     | Kota Bitung               | 56,393                                                | 4,320         | 60,713         | 7.12  | TSCB       |
| 109 | Sulut     | Kota Manado               | 128,904                                               | 20,415        | 149,319        | 13.67 | TSCSB      |
| 110 | Gorontalo | Kab. Gorontalo            | 255,639                                               | 10,529        | 266,168        | 3.96  | TSCC       |
| 111 | Gorontalo | Kota Gorontalo            | 41,971                                                | 4,419         | 46,390         | 9.53  | TSCSB      |
| 112 | Sulteng   | Kab. Banggai              | 185,477                                               | 3,220         | 188,697        | 1.71  | TSCK       |
| 113 | Sulteng   | Kab. Tolitoli             | 101,823                                               | 3,293         | 105,116        | 3.13  | TSCC       |
| 114 | Sulteng   | Kab. Donggala*)           | 307,371                                               | 3,081         | 310,452        | 0.99  | TSCSK      |
| 115 | Sulteng   | Kab. Morowali             | 79,904                                                | 2,170         | 82,074         | 2.64  | TSCK       |
| 116 | Sulteng   | Kab. Poso*)               | 180,232                                               | 3,320         | 183,552        | 1.81  | TSCK       |
| 117 | Sultra    | Kab. Buton                | 204,384                                               | 6,498         | 210,882        | 3.08  | TSCC       |
| 118 | Sultra    | Kab. Kolaka               | 120,881                                               | 3,276         | 124,157        | 2.64  | TSCK       |
| 119 | Sulsel    | Kab. Luwu                 | 304,939                                               | 4,724         | 309,663        | 1.53  | TSCK       |
| 120 | Sulsel    | Kab. Majene               | 38,853                                                | 981           | 39,834         | 2.46  | TSCK       |
| 121 | Sulsel    | Kab. Pangkajene Kepulauan | 84,596                                                | 5,369         | 89,965         | 5.97  | TSCB       |
| 122 | Sulsel    | Kab. Pinrang              | 108,794                                               | 2,313         | 111,107        | 2.08  | TSCK       |
| 123 | Sulsel    | Kab. Tana Toraja          | 158,744                                               | 4,019         | 162,763        | 2.47  | TSCK       |
| 124 | Sulsel    | Kota Parepare             | 33,887                                                | 2,239         | 36,126         | 6.20  | TSCB       |
| 125 | NTB       | Kab. Bima                 | 206,641                                               | 11,021        | 217,662        | 5.06  | TSCC       |
| 126 | NTB       | Kab. Lombok Barat         | 281,736                                               | 8,214         | 289,950        | 2.83  | TSCK       |
| 127 | NTB       | Kota Mataram              | 108,673                                               | 8,364         | 117,037        | 7.15  | TSCB       |
| 128 | NTT       | Kab. Ende                 | 124,368                                               | 2,560         | 126,928        | 2.02  | TSCK       |
| 129 | NTT       | Kab. Flores Timur         | 142,961                                               | 2,131         | 145,092        | 1.47  | TSCSK      |
| 130 | NTT       | Kab. Timor Tengah Selatan | 174,568                                               | 1,042         | 175,610        | 0.59  | TSCSK      |
| 131 | NTT       | Kab. Timor Tengah Utara   | 104,258                                               | 657           | 104,915        | 0.63  | TSCSK      |
| 132 | NTT       | Kota Kupang               | 74,884                                                | 11,233        | 86,117         | 13.04 | TSCSB      |
| 133 | Papua     | Kab. Fakfak               | 56,025                                                | 1,879         | 57,904         | 3.25  | TSCC       |
| 134 | Papua     | Kab. Manokwari            | 89,520                                                | 1,369         | 90,889         | 1.51  | TSCK       |

Sumber : Susenias Kor 2000 BPS, yang telah diolah

Rata-rata : 4.56  
Standev : 3.35

**Keterangan :**

**TSC:** Singkatan dari Tenaga Kerja - Ketersediaan - Pencari Kerja

Huruf setelah TSC : **SB** : Sangat Banyak

**B** : Banyak

**C** : Cukup

**K** : Kurang

**SK** : Sangat Kurang

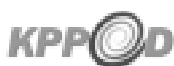



Lampiran 4.2.3.2. Variabel Biaya Tenaga Kerja

Lampiran 4.2.3.2.1. Indikator Biaya Tenaga Kerja Berdasarkan Aturan Formal

| No. | Propinsi | Kabupaten/Kota          | Kota Terdekat    | IHK 2001 | UMP atau UMK 2001 | Rasio UMP/K Thd IHK | Intensitas |
|-----|----------|-------------------------|------------------|----------|-------------------|---------------------|------------|
| 1   | Sumut    | Kab. Asahan             | Pematang Siantar | 13.55    | 464,000           | 34,244              | TBRSD      |
| 2   | Sumut    | Kab. Dairi              | Pematang Siantar | 13.55    | 464,000           | 34,244              | TBRSD      |
| 3   | Sumut    | Kab. Deli Serdang       | Medan            | 15.50    | 464,000           | 29,935              | TBRSD      |
| 4   | Sumut    | Kab. Langkat            | Medan            | 15.50    | 464,000           | 29,935              | TBRSD      |
| 5   | Sumut    | Kab. Simalungun         | Pematang Siantar | 13.55    | 464,000           | 34,244              | TBRSD      |
| 6   | Sumut    | Kota Binjai             | Medan            | 15.50    | 464,000           | 29,935              | TBRSD      |
| 7   | Sumut    | Kota Medan              | Medan            | 15.50    | 464,000           | 29,935              | TBRSD      |
| 8   | Sumut    | Kota Pematang Siantar   | Pematang Siantar | 13.55    | 464,000           | 34,244              | TBRSD      |
| 9   | Sumut    | Kota Sibolga            | Sibolga          | 8.66     | 464,000           | 53,580              | TBSRT      |
| 10  | Sumut    | Kota Tanjung Balai      | Pematang Siantar | 13.55    | 464,000           | 34,244              | TBRSD      |
| 11  | Sumut    | Kota Tebing Tinggi      | Pematang Siantar | 13.55    | 464,000           | 34,244              | TBRSD      |
| 12  | Sumbar   | Kab. Pesisir Selatan    | Padang           | 9.86     | 385,000           | 39,047              | TBRT       |
| 13  | Sumbar   | Kab. Sijunjung          | Padang           | 9.86     | 385,000           | 39,047              | TBRT       |
| 14  | Sumbar   | Kota Padang             | Padang           | 9.86     | 385,000           | 39,047              | TBRT       |
| 15  | Sumbar   | Kota Sawah Lunto        | Padang           | 9.86     | 385,000           | 39,047              | TBRT       |
| 16  | Riau     | Kab. Bengkalis          | Pekan Baru       | 14.65    | 394,000           | 26,894              | TBRSD      |
| 17  | Riau     | Kab. Indragiri Hilir    | Pekan Baru       | 14.65    | 394,000           | 26,894              | TBRSD      |
| 18  | Riau     | Kab. Kampar             | Pekan Baru       | 14.65    | 394,000           | 26,894              | TBRSD      |
| 19  | Riau     | Kota Batam              | Batam            | 12.64    | 510,000           | 40,348              | TBRT       |
| 20  | Riau     | Kota Pekanbaru          | Pekan Baru       | 14.65    | 394,000           | 26,894              | TBRSD      |
| 21  | Jambi    | Kab. Batanghari         | Jambi            | 10.11    | 304,000           | 30,069              | TBRSD      |
| 22  | Jambi    | Kab. Bungo              | Jambi            | 10.11    | 304,000           | 30,069              | TBRSD      |
| 23  | Jambi    | Kab. Kerinci            | Jambi            | 10.11    | 304,000           | 30,069              | TBRSD      |
| 24  | Sumsel   | Kab. Muara Enim         | Palembang        | 15.15    | 331,500           | 21,881              | TBRR       |
| 25  | Sumsel   | Kab. Musi Banyu Asin    | Palembang        | 15.15    | 331,500           | 21,881              | TBRR       |
| 26  | Sumsel   | Kab. Musi Rawas         | Palembang        | 15.15    | 331,500           | 21,881              | TBRR       |
| 27  | Sumsel   | Kab. Ogan Komiring Ilir | Palembang        | 15.15    | 331,500           | 21,881              | TBRR       |
| 28  | Sumsel   | Kota Palembang          | Palembang        | 15.15    | 331,500           | 21,881              | TBRR       |
| 29  | Babel    | Kab. Bangka             | Palembang        | 15.15    | 361,120           | 23,836              | TBRR       |
| 30  | Babel    | Kota Pangkal Pinang     | Palembang        | 15.15    | 361,850           | 23,884              | TBRR       |
| 31  | Bengkulu | Kab. Bengkulu Selatan   | Bengkulu         | 10.58    | 295,000           | 27,883              | TBRSD      |
| 32  | Bengkulu | Kota Bengkulu           | Bengkulu         | 10.58    | 295,000           | 27,883              | TBRSD      |
| 33  | Lampung  | Kab. Lampung Barat      | Bandar Lampung   | 12.94    | 310,000           | 23,957              | TBRR       |
| 34  | Lampung  | Kab. Lampung Selatan    | Bandar Lampung   | 12.94    | 310,000           | 23,957              | TBRR       |
| 35  | Lampung  | Kab. Lampung Timur      | Bandar Lampung   | 12.94    | 310,000           | 23,957              | TBRR       |
| 36  | Lampung  | Kota Bandar Lampung     | Bandar Lampung   | 12.94    | 310,000           | 23,957              | TBRR       |
| 37  | Banten   | Kab. Lebak              | Serang/Cilegon   | 12.75    | 360,000           | 28,235              | TBRSD      |
| 38  | Banten   | Kab. Serang             | Serang/Cilegon   | 12.75    | 360,000           | 28,235              | TBRSD      |
| 39  | Banten   | Kab. Tangerang          | Serang/Cilegon   | 12.75    | 590,000           | 46,275              | TBSRT      |
| 40  | Banten   | Kota Tangerang          | Jakarta          | 11.52    | 590,000           | 51,215              | TBSRT      |
| 41  | Jabar    | Kab. Bekasi             | Jakarta          | 11.52    | 575,500           | 49,957              | TBSRT      |
| 42  | Jabar    | Kab. Bogor              | Jakarta          | 11.52    | 570,169           | 49,494              | TBSRT      |
| 43  | Jabar    | Kab. Ciamis             | Bandung          | 11.91    | 284,500           | 23,887              | TBRR       |
| 44  | Jabar    | Kab. Cirebon            | Cirebon          | 12.93    | 280,779           | 21,715              | TBRR       |
| 45  | Jabar    | Kab. Garut              | Bandung          | 11.91    | 285,000           | 23,929              | TBRR       |
| 46  | Jabar    | Kab. Indramayu          | Cirebon          | 12.93    | 280,779           | 21,715              | TBRR       |
| 47  | Jabar    | Kab. Karawang           | Jakarta          | 11.52    | 530,015           | 46,008              | TBSRT      |

| No. | Propinsi | Kabupaten/Kota      | Kota Terdekat | IHK 2001 | UMP atau UMK 2001 | Rasio UMP/K Thd IHK | Intensitas |
|-----|----------|---------------------|---------------|----------|-------------------|---------------------|------------|
| 48  | Jabar    | Kab. Kuningan       | Cirebon       | 12.93    | 280,779           | 21,715              | TBRR       |
| 49  | Jabar    | Kab. Sukabumi       | Bandung       | 11.91    | 281,000           | 23,594              | TBRR       |
| 50  | Jabar    | Kab. Sumedang       | Cirebon       | 12.93    | 470,000           | 36,350              | TBRT       |
| 51  | Jabar    | Kab. Tasik          | Tasikmalaya   | 16.71    | 280,779           | 16,803              | TBRSR      |
| 52  | Jabar    | Kota Bekasi         | Jakarta       | 11.52    | 575,500           | 49,957              | TBSRT      |
| 53  | Jabar    | Kota Bogor          | Bandung       | 11.91    | 576,169           | 48,377              | TBSRT      |
| 54  | Jabar    | Kota Cirebon        | Cirebon       | 12.93    | 417,000           | 32,251              | TBRSD      |
| 55  | Jabar    | Kota Sukabumi       | Bandung       | 11.91    | 280,779           | 23,575              | TBRR       |
| 56  | Jateng   | Kab. Kendal         | Semarang      | 13.98    | 330,000           | 23,605              | TBRR       |
| 57  | Jateng   | Kab. Magelang       | Yogyakarta    | 12.26    | 320,200           | 26,117              | TBRSD      |
| 58  | Jateng   | Kab. Pekalongan     | Tegal         | 11.26    | 322,800           | 28,668              | TBRSD      |
| 59  | Jateng   | Kab. Pemasang       | Tegal         | 11.26    | 336,150           | 29,853              | TBRSD      |
| 60  | Jateng   | Kab. Sukoharjo      | Surakarta     | 15.58    | 327,900           | 21,046              | TBRSR      |
| 61  | Jateng   | Kab. Tegal          | Tegal         | 11.26    | 321,700           | 28,570              | TBRSD      |
| 62  | Jateng   | Kota Pekalongan     | Tegal         | 11.26    | 332,850           | 29,560              | TBRSD      |
| 63  | Jateng   | Kota Semarang       | Semarang      | 13.98    | 343,250           | 24,553              | TBRR       |
| 64  | Jateng   | Kota Tegal          | Tegal         | 11.26    | 326,900           | 29,032              | TBRSD      |
| 65  | DIY      | Kota Yogyakarta     | Yogyakarta    | 12.26    | 321,750           | 26,244              | TBRSD      |
| 66  | Jatim    | Kab. Bangkalan      | Surabaya      | 14.13    | 330,000           | 23,355              | TBRR       |
| 67  | Jatim    | Kab. Banyuwangi     | Jember        | 13.92    | 267,500           | 19,217              | TBRSR      |
| 68  | Jatim    | Kab. Blitar         | Malang        | 12.45    | 267,950           | 21,522              | TBRR       |
| 69  | Jatim    | Kab. Kediri         | Kediri        | 15.91    | 361,250           | 22,706              | TBRR       |
| 70  | Jatim    | Kab. Magetan        | Kediri        | 15.91    | 260,000           | 16,342              | TBRSR      |
| 71  | Jatim    | Kab. Mojokerto      | Surabaya      | 14.13    | 453,000           | 32,059              | TBRSD      |
| 72  | Jatim    | Kab. Pamekasan      | Surabaya      | 14.13    | 300,000           | 21,231              | TBRSR      |
| 73  | Jatim    | Kab. Pasuruan       | Surabaya      | 14.13    | 453,000           | 32,059              | TBRSD      |
| 74  | Jatim    | Kab. Sidoarjo       | Surabaya      | 14.13    | 453,000           | 32,059              | TBRSD      |
| 75  | Jatim    | Kota Kediri         | Kediri        | 15.91    | 361,250           | 22,706              | TBRR       |
| 76  | Jatim    | Kota Malang         | Malang        | 12.45    | 443,000           | 35,582              | TBRT       |
| 77  | Jatim    | Kota Mojokerto      | Surabaya      | 14.13    | 453,000           | 32,059              | TBRSD      |
| 78  | Jatim    | Kota Probolinggo    | Jember        | 13.92    | 400,000           | 28,736              | TBRSD      |
| 79  | Jatim    | Kota Surabaya       | Surabaya      | 14.13    | 453,200           | 32,074              | TBRSD      |
| 80  | Bali     | Kab. Badung         | Denpasar      | 11.52    | 385,000           | 33,420              | TBRSD      |
| 81  | Bali     | Kab. Bangli         | Denpasar      | 11.52    | 341,000           | 29,601              | TBRSD      |
| 82  | Bali     | Kab. Buleleng       | Denpasar      | 11.52    | 341,000           | 29,601              | TBRSD      |
| 83  | Bali     | Kab. Gianyar        | Denpasar      | 11.52    | 345,000           | 29,948              | TBRSD      |
| 84  | Bali     | Kab. Jembrana       | Denpasar      | 11.52    | 341,000           | 29,601              | TBRSD      |
| 85  | Bali     | Kab. Tabanan        | Denpasar      | 11.52    | 341,000           | 29,601              | TBRSD      |
| 86  | Bali     | Kota Denpasar       | Denpasar      | 11.52    | 385,000           | 33,420              | TBRSD      |
| 87  | Kalbar   | Kab. Kapuas Hulu    | Sampit        | 14.69    | 380,000           | 25,868              | TBRR       |
| 88  | Kalbar   | Kab. Ketapang       | Sampit        | 14.69    | 380,000           | 25,868              | TBRR       |
| 89  | Kalbar   | Kab. Pontianak      | Pontianak     | 10.60    | 380,000           | 35,849              | TBRT       |
| 90  | Kalbar   | Kab. Sambas         | Pontianak     | 10.60    | 380,000           | 35,849              | TBRT       |
| 91  | Kalbar   | Kab. Sanggau        | Sampit        | 14.69    | 380,000           | 25,868              | TBRR       |
| 92  | Kalteng  | Kab. Barito Selatan | Palangkaraya  | 13.35    | 362,000           | 27,116              | TBRSD      |
| 93  | Kalteng  | Kab. Barito Utara   | Palangkaraya  | 13.35    | 362,000           | 27,116              | TBRSD      |
| 94  | Kalteng  | Kab. Kapuas         | Palangkaraya  | 13.35    | 362,000           | 27,116              | TBRSD      |

| No. | Propinsi  | Kabupaten/Kota            | Kota Terdekat | IHK 2001 | UMP atau UMK 2001 | Rasio UMP/K Thd IHK | Intensitas |
|-----|-----------|---------------------------|---------------|----------|-------------------|---------------------|------------|
| 95  | Kalsel    | Kab. Hulu Sungai Selatan  | Banjarmasin   | 8.36     | 377,500           | 45,156              | TBSRT      |
| 96  | Kalsel    | Kab. Hulu Sungai Utara    | Banjarmasin   | 8.36     | 377,500           | 45,156              | TBSRT      |
| 97  | Kalsel    | Kab. Hulu Sungai Tengah   | Banjarmasin   | 8.36     | 377,500           | 45,156              | TBSRT      |
| 98  | Kalsel    | Kab. Tabalong             | Banjarmasin   | 8.36     | 500,000           | 59,809              | TBSRT      |
| 99  | Kalsel    | Kab. Tanah Laut           | Banjarmasin   | 8.36     | 500,000           | 59,809              | TBSRT      |
| 100 | Kalsel    | Kab. Tapin                | Banjarmasin   | 8.36     | 500,000           | 59,809              | TBSRT      |
| 101 | Kaltim    | Kab. Berau                | Balikpapan    | 10.82    | 500,000           | 46,211              | TBSRT      |
| 102 | Kaltim    | Kab. Kutai                | Samarinda     | 10.21    | 500,000           | 48,972              | TBSRT      |
| 103 | Kaltim    | Kab. Pasir                | Balikpapan    | 10.82    | 500,000           | 46,211              | TBSRT      |
| 104 | Kaltim    | Kota Balikpapan           | Balikpapan    | 10.82    | 500,000           | 46,211              | TBSRT      |
| 105 | Kaltim    | Kota Samarinda            | Samarinda     | 10.21    | 500,000           | 48,972              | TBSRT      |
| 106 | Sulut     | Kab. Minahasa             | Manado        | 13.30    | 438,000           | 32,932              | TBRSD      |
| 107 | Sulut     | Kab. Sangietalaut         | Manado        | 13.30    | 438,000           | 32,932              | TBRSD      |
| 108 | Sulut     | Kota Bitung               | Manado        | 13.30    | 438,000           | 32,932              | TBRSD      |
| 109 | Sulut     | Kota Manado               | Manado        | 13.30    | 438,000           | 32,932              | TBRSD      |
| 110 | Gorontalo | Kab. Gorontalo            | Manado        | 13.30    | 375,000           | 28,195              | TBRSD      |
| 111 | Gorontalo | Kota Gorontalo            | Manado        | 13.30    | 375,000           | 28,195              | TBRSD      |
| 112 | Sulteng   | Kab. Banggai              | Palu          | 18.73    | 350,000           | 18,687              | TBRSR      |
| 113 | Sulteng   | Kab. Tolioli              | Palu          | 18.73    | 350,000           | 18,687              | TBRSR      |
| 114 | Sulteng   | Kab. Donggala*)           | Palu          | 18.73    | 350,000           | 18,687              | TBRSR      |
| 115 | Sulteng   | Kab. Morowali             | Palu          | 18.73    | 350,000           | 18,687              | TBRSR      |
| 116 | Sulteng   | Kab. Poso*)               | Palu          | 18.73    | 350,000           | 18,687              | TBRSR      |
| 117 | Sultra    | Kab. Buton                | Kendari       | 12.56    | 325,000           | 25,876              | TBRR       |
| 118 | Sultra    | Kab. Kolaka               | Kendari       | 12.56    | 325,000           | 25,876              | TBRR       |
| 119 | Sulsel    | Kab. Luwu                 | Ujung Pandang | 11.77    | 375,000           | 31,861              | TBRSD      |
| 120 | Sulsel    | Kab. Majene               | Ujung Pandang | 11.77    | 375,000           | 31,861              | TBRSD      |
| 121 | Sulsel    | Kab. Pangkajene Kepulauan | Ujung Pandang | 11.77    | 375,000           | 31,861              | TBRSD      |
| 122 | Sulsel    | Kab. Pinrang              | Ujung Pandang | 11.77    | 375,000           | 31,861              | TBRSD      |
| 123 | Sulsel    | Kab. Tana Toraja          | Ujung Pandang | 11.77    | 375,000           | 31,861              | TBRSD      |
| 124 | Sulsel    | Kota Parepare             | Ujung Pandang | 11.77    | 375,000           | 31,861              | TBRSD      |
| 125 | NTB       | Kab. Bima                 | Mataram       | 14.76    | 320,000           | 21,680              | TBRR       |
| 126 | NTB       | Kab. Lombok Barat         | Mataram       | 14.76    | 320,000           | 21,680              | TBRR       |
| 127 | NTB       | Kota Mataram              | Mataram       | 14.76    | 320,000           | 21,680              | TBRR       |
| 128 | NTT       | Kab. Ende                 | Kupang        | 12.34    | 330,000           | 26,742              | TBRSD      |
| 129 | NTT       | Kab. Flores Timur         | Kupang        | 12.34    | 330,000           | 26,742              | TBRSD      |
| 130 | NTT       | Kab. Timor Tengah Selatan | Kupang        | 12.34    | 330,000           | 26,742              | TBRSD      |
| 131 | NTT       | Kab. Timor Tengah Utara   | Kupang        | 12.34    | 330,000           | 26,742              | TBRSD      |
| 132 | NTT       | Kota Kupang               | Kupang        | 12.34    | 330,000           | 26,742              | TBRSD      |
| 133 | Papua     | Kab. Fakfak               | Jayapura      | 14.00    | 530,000           | 37,857              | TBRT       |
| 134 | Papua     | Kab. Manokwari            | Jayapura      | 14.00    | 530,000           | 37,857              | TBRT       |

Sumber : BPS IHK 2001, UMK/UMP2001 Kabupaten/Kota/Propinsi di Indonesia  
Susenas Kor 2000 BPS  
IHK berdasarkan Data IHK Kota Terdekat

Rata-rata : 31,047.09  
Standev : 9,345.65

**Keterangan :**

**TBR** : Singkatan dari Tenaga Kerja - Biaya - Rasio Biaya Tenaga Kerja Formal/IHK

Huruf setelah TBR : **ST** : Sangat Tinggi,

**T** : Tinggi

**SD** : Sedang

**R** : Rendah

**SR** : Sangat Rendah



Lampiran 4.2.3.2.2.

Indikator Biaya Tenaga Kerja Aktual

| No. | Propinsi | Kabupaten/Kota          | Kota Terdekat    | IHK 2001 | Rata-rata Upah TK | Rasio Rata Upah TK Thd IHK | Intensitas |
|-----|----------|-------------------------|------------------|----------|-------------------|----------------------------|------------|
| 1   | Sumut    | Kab. Asahan             | Pematang Siantar | 13.55    | 369,005           | 27,233                     | TBDSD      |
| 2   | Sumut    | Kab. Dairi              | Pematang Siantar | 13.55    | 223,433           | 16,489                     | TBDR       |
| 3   | Sumut    | Kab. Deli Serdang       | Medan            | 15.50    | 226,859           | 14,636                     | TBDR       |
| 4   | Sumut    | Kab. Langkat            | Medan            | 15.50    | 281,966           | 18,191                     | TBDSD      |
| 5   | Sumut    | Kab. Simalungun         | Pematang Siantar | 13.55    | 185,462           | 13,687                     | TBDR       |
| 6   | Sumut    | Kota Binjai             | Medan            | 15.50    | 288,139           | 18,590                     | TBDSD      |
| 7   | Sumut    | Kota Medan              | Medan            | 15.50    | 513,640           | 33,138                     | TBDT       |
| 8   | Sumut    | Kota Pematang Siantar   | Pematang Siantar | 13.55    | 301,726           | 22,268                     | TBDSD      |
| 9   | Sumut    | Kota Sibolga            | Sibolga          | 8.66     | 326,644           | 37,719                     | TBDT       |
| 10  | Sumut    | Kota Tanjung Balai      | Pematang Siantar | 13.55    | 348,634           | 25,729                     | TBDSD      |
| 11  | Sumut    | Kota Tebing Tinggi      | Pematang Siantar | 13.55    | 203,509           | 15,019                     | TBDR       |
| 12  | Sumbar   | Kab. Pesisir Selatan    | Padang           | 9.86     | 150,765           | 15,291                     | TBDR       |
| 13  | Sumbar   | Kab. Sijunjung          | Padang           | 9.86     | 345,790           | 35,070                     | TBDT       |
| 14  | Sumbar   | Kota Padang             | Padang           | 9.86     | 580,514           | 58,876                     | TBDST      |
| 15  | Sumbar   | Kota Sawah Lunto        | Padang           | 9.86     | 276,283           | 28,021                     | TBDSD      |
| 16  | Riau     | Kab. Bengkalis          | Pekan Baru       | 14.65    | 508,591           | 34,716                     | TBDT       |
| 17  | Riau     | Kab. Indragiri Hilir    | Pekan Baru       | 14.65    | 256,654           | 17,519                     | TBDSD      |
| 18  | Riau     | Kab. Kampar             | Pekan Baru       | 14.65    | 185,571           | 12,667                     | TBDR       |
| 19  | Riau     | Kota Batam              | Batam            | 12.64    | 422,181           | 33,400                     | TBDT       |
| 20  | Riau     | Kota Pekanbaru          | Pekan Baru       | 14.65    | 633,573           | 43,247                     | TBDST      |
| 21  | Jambi    | Kab. Batanghari         | Jambi            | 10.11    | 345,574           | 34,181                     | TBDT       |
| 22  | Jambi    | Kab. Bungo              | Jambi            | 10.11    | 299,835           | 29,657                     | TBDSD      |
| 23  | Jambi    | Kab. Kerinci            | Jambi            | 10.11    | 351,890           | 34,806                     | TBDT       |
| 24  | Sumsel   | Kab. Muara Enim         | Palembang        | 15.15    | 258,539           | 17,065                     | TBDSD      |
| 25  | Sumsel   | Kab. Musi Banyu Asin    | Palembang        | 15.15    | 349,151           | 23,046                     | TBDSD      |
| 26  | Sumsel   | Kab. Musi Rawas         | Palembang        | 15.15    | 262,982           | 17,359                     | TBDSD      |
| 27  | Sumsel   | Kab. Ogam Komiring Ilir | Palembang        | 15.15    | 221,610           | 14,628                     | TBDR       |
| 28  | Sumsel   | Kota Palembang          | Palembang        | 15.15    | 370,155           | 24,433                     | TBDSD      |
| 29  | Babel    | Kab. Bangka             | Palembang        | 15.15    | 313,410           | 20,687                     | TBDSD      |
| 30  | Babel    | Kota Pangkal Pinang     | Palembang        | 15.15    | 267,688           | 17,669                     | TBDSD      |
| 31  | Bengkulu | Kab. Bengkulu Selatan   | Bengkulu         | 10.58    | 420,433           | 39,738                     | TBDT       |
| 32  | Bengkulu | Kota Bengkulu           | Bengkulu         | 10.58    | 342,470           | 32,370                     | TBDT       |
| 33  | Lampung  | Kab. Lampung Barat      | Bandar Lampung   | 12.94    | 181,477           | 14,024                     | TBDR       |
| 34  | Lampung  | Kab. Lampung Selatan    | Bandar Lampung   | 12.94    | 175,317           | 13,548                     | TBDR       |
| 35  | Lampung  | Kab. Lampung Timur      | Bandar Lampung   | 12.94    | 561,462           | 43,390                     | TBDST      |
| 36  | Lampung  | Kota Bandar Lampung     | Bandar Lampung   | 12.94    | 284,906           | 22,017                     | TBDSD      |
| 37  | Banten   | Kab. Lebak              | Serang/Cilegon   | 12.75    | 171,572           | 13,457                     | TBDR       |
| 38  | Banten   | Kab. Serang             | Serang/Cilegon   | 12.75    | 274,006           | 21,491                     | TBDSD      |
| 39  | Banten   | Kab. Tangerang          | Serang/Cilegon   | 12.75    | 272,489           | 21,372                     | TBDSD      |
| 40  | Banten   | Kota Tangerang          | Jakarta          | 11.52    | 391,095           | 33,949                     | TBDT       |
| 41  | Jabar    | Kab. Bekasi             | Jakarta          | 11.52    | 240,979           | 20,918                     | TBDSD      |
| 42  | Jabar    | Kab. Bogor              | Jakarta          | 11.52    | 310,363           | 26,941                     | TBDSD      |
| 43  | Jabar    | Kab. Ciamis             | Bandung          | 11.91    | 228,049           | 19,148                     | TBDSD      |
| 44  | Jabar    | Kab. Cirebon            | Cirebon          | 12.93    | 252,636           | 19,539                     | TBDSD      |
| 45  | Jabar    | Kab. Garut              | Bandung          | 11.91    | 200,418           | 16,828                     | TBDR       |
| 46  | Jabar    | Kab. Indramayu          | Cirebon          | 12.93    | 234,341           | 18,124                     | TBDSD      |
| 47  | Jabar    | Kab. Karawang           | Jakarta          | 11.52    | 245,301           | 21,293                     | TBDSD      |



| No. | Propinsi | Kabupaten/Kota      | Kota Terdekat | IHK 2001 | Rata-rata Upah TK | Rasio Rata Upah TK Thd IHK | Intensitas |
|-----|----------|---------------------|---------------|----------|-------------------|----------------------------|------------|
| 48  | Jabar    | Kab. Kuningan       | Cirebon       | 12.93    | 204,970           | 15,852                     | TBDR       |
| 49  | Jabar    | Kab. Sukabumi       | Bandung       | 11.91    | 176,138           | 14,789                     | TBDR       |
| 50  | Jabar    | Kab. Sumedang       | Cirebon       | 12.93    | 310,076           | 23,981                     | TBDSD      |
| 51  | Jabar    | Kab. Tasik          | Tasikmalaya   | 16.71    | 137,574           | 8,233                      | TBDSR      |
| 52  | Jabar    | Kota Bekasi         | Jakarta       | 11.52    | 601,672           | 52,228                     | TBDST      |
| 53  | Jabar    | Kota Bogor          | Bandung       | 11.91    | 473,805           | 39,782                     | TBDT       |
| 54  | Jabar    | Kota Cirebon        | Cirebon       | 12.93    | 312,852           | 24,196                     | TBDSD      |
| 55  | Jabar    | Kota Sukabumi       | Bandung       | 11.91    | 205,966           | 17,293                     | TBDSD      |
| 56  | Jateng   | Kab. Kendal         | Semarang      | 13.98    | 189,891           | 13,583                     | TBDR       |
| 57  | Jateng   | Kab. Magelang       | Yogyakarta    | 12.26    | 174,039           | 14,196                     | TBDR       |
| 58  | Jateng   | Kab. Pekalongan     | Tegal         | 11.26    | 191,267           | 16,986                     | TBDR       |
| 59  | Jateng   | Kab. Pemalang       | Tegal         | 11.26    | 146,755           | 13,033                     | TBDR       |
| 60  | Jateng   | Kab. Sukoharjo      | Surakarta     | 15.58    | 214,095           | 13,742                     | TBDR       |
| 61  | Jateng   | Kab. Tegal          | Tegal         | 11.26    | 173,590           | 15,416                     | TBDR       |
| 62  | Jateng   | Kota Pekalongan     | Tegal         | 11.26    | 277,549           | 24,649                     | TBDSD      |
| 63  | Jateng   | Kota Semarang       | Semarang      | 13.98    | 322,219           | 23,049                     | TBDSD      |
| 64  | Jateng   | Kota Tegal          | Tegal         | 11.26    | 194,324           | 17,258                     | TBDSD      |
| 65  | DIY      | Kota Yogyakarta     | Yogyakarta    | 12.26    | 548,024           | 44,700                     | TBDST      |
| 66  | Jatim    | Kab. Bangkalan      | Surabaya      | 14.13    | 322,728           | 22,840                     | TBDSD      |
| 67  | Jatim    | Kab. Banyuwangi     | Jember        | 13.92    | 266,070           | 19,114                     | TBDSD      |
| 68  | Jatim    | Kab. Blitar         | Malang        | 12.45    | 153,471           | 12,327                     | TBDR       |
| 69  | Jatim    | Kab. Kediri         | Kediri        | 15.91    | 157,551           | 9,903                      | TBDSR      |
| 70  | Jatim    | Kab. Magetan        | Kediri        | 15.91    | 181,219           | 11,390                     | TBDSR      |
| 71  | Jatim    | Kab. Mojokerto      | Surabaya      | 14.13    | 328,589           | 23,255                     | TBDSD      |
| 72  | Jatim    | Kab. Pamekasan      | Surabaya      | 14.13    | 117,492           | 8,315                      | TBDSR      |
| 73  | Jatim    | Kab. Pasuruan       | Surabaya      | 14.13    | 204,400           | 14,466                     | TBDR       |
| 74  | Jatim    | Kab. Sidoarjo       | Surabaya      | 14.13    | 343,037           | 24,277                     | TBDSD      |
| 75  | Jatim    | Kota Kediri         | Kediri        | 15.91    | 281,658           | 17,703                     | TBDSD      |
| 76  | Jatim    | Kota Malang         | Malang        | 12.45    | 354,711           | 28,491                     | TBDSD      |
| 77  | Jatim    | Kota Mojokerto      | Surabaya      | 14.13    | 253,398           | 17,933                     | TBDSD      |
| 78  | Jatim    | Kota Probolinggo    | Jember        | 13.92    | 348,763           | 25,055                     | TBDSD      |
| 79  | Jatim    | Kota Surabaya       | Surabaya      | 14.13    | 335,844           | 23,768                     | TBDSD      |
| 80  | Bali     | Kab. Badung         | Denpasar      | 11.52    | 406,279           | 35,267                     | TBDT       |
| 81  | Bali     | Kab. Bangli         | Denpasar      | 11.52    | 326,336           | 28,328                     | TBDSD      |
| 82  | Bali     | Kab. Buleleng       | Denpasar      | 11.52    | 195,726           | 16,990                     | TBDR       |
| 83  | Bali     | Kab. Gianyar        | Denpasar      | 11.52    | 265,188           | 23,020                     | TBDSD      |
| 84  | Bali     | Kab. Jembrana       | Denpasar      | 11.52    | 231,183           | 20,068                     | TBDSD      |
| 85  | Bali     | Kab. Tabanan        | Denpasar      | 11.52    | 217,987           | 18,923                     | TBDSD      |
| 86  | Bali     | Kota Denpasar       | Denpasar      | 11.52    | 973,083           | 84,469                     | TBDST      |
| 87  | Kalbar   | Kab. Kapuas Hulu    | Sampit        | 14.69    | 314,654           | 21,420                     | TBDSD      |
| 88  | Kalbar   | Kab. Ketapang       | Sampit        | 14.69    | 208,324           | 14,181                     | TBDR       |
| 89  | Kalbar   | Kab. Pontianak      | Pontianak     | 10.60    | 388,834           | 36,682                     | TBDT       |
| 90  | Kalbar   | Kab. Sambas         | Pontianak     | 10.60    | 312,590           | 29,490                     | TBDSD      |
| 91  | Kalbar   | Kab. Sanggau        | Sampit        | 14.69    | 307,466           | 20,930                     | TBDSD      |
| 92  | Kalteng  | Kab. Barito Selatan | Palangkaraya  | 13.35    | 240,817           | 18,039                     | TBDSD      |
| 93  | Kalteng  | Kab. Barito Utara   | Palangkaraya  | 13.35    | 201,587           | 15,100                     | TBDR       |
| 94  | Kalteng  | Kab. Kapuas         | Palangkaraya  | 13.35    | 461,994           | 34,606                     | TBDT       |

| No. | Propinsi  | Kabupaten/Kota            | Kota Terdekat | IHK 2001 | Rata-rata Upah TK | Rasio Rata Upah TK Thd IHK | Intensitas |
|-----|-----------|---------------------------|---------------|----------|-------------------|----------------------------|------------|
| 95  | Kalsel    | Kab. Hulu Sungai Selatan  | Banjarmasin   | 8.36     | 220,799           | 26,411                     | TBDSD      |
| 96  | Kalsel    | Kab. Hulu Sungai Utara    | Banjarmasin   | 8.36     | 227,124           | 27,168                     | TBDSD      |
| 97  | Kalsel    | Kab. Hulu Sungai Tengah   | Banjarmasin   | 8.36     | 165,169           | 19,757                     | TBDSD      |
| 98  | Kalsel    | Kab. Tabalong             | Banjarmasin   | 8.36     | 354,771           | 42,437                     | TBDST      |
| 99  | Kalsel    | Kab. Tanah Laut           | Banjarmasin   | 8.36     | 163,884           | 19,603                     | TBDSD      |
| 100 | Kalsel    | Kab. Tapin                | Banjarmasin   | 8.36     | 267,506           | 31,998                     | TBDT       |
| 101 | Kaltim    | Kab. Berau                | Balikpapan    | 10.82    | 284,434           | 26,288                     | TBDSD      |
| 102 | Kaltim    | Kab. Kutai                | Samarinda     | 10.21    | 568,267           | 55,658                     | TBDST      |
| 103 | Kaltim    | Kab. Pasir                | Balikpapan    | 10.82    | 176,511           | 16,313                     | TBDR       |
| 104 | Kaltim    | Kota Balikpapan           | Balikpapan    | 10.82    | 573,861           | 53,037                     | TBDST      |
| 105 | Kaltim    | Kota Samarinda            | Samarinda     | 10.21    | 409,950           | 40,152                     | TBDST      |
| 106 | Sulut     | Kab. Minahasa             | Manado        | 13.30    | 256,844           | 19,312                     | TBDSD      |
| 107 | Sulut     | Kab. Sangiatalaut         | Manado        | 13.30    | 137,544           | 10,342                     | TBDSR      |
| 108 | Sulut     | Kota Bitung               | Manado        | 13.30    | 509,103           | 38,278                     | TBDT       |
| 109 | Sulut     | Kota Manado               | Manado        | 13.30    | 273,513           | 20,565                     | TBDSD      |
| 110 | Gorontalo | Kab. Gorontalo            | Manado        | 13.30    | 157,807           | 11,865                     | TBDR       |
| 111 | Gorontalo | Kota Gorontalo            | Manado        | 13.30    | 200,721           | 15,092                     | TBDR       |
| 112 | Sulteng   | Kab. Banggai              | Palu          | 18.73    | 364,366           | 19,454                     | TBDSD      |
| 113 | Sulteng   | Kab. Tolitoli             | Palu          | 18.73    | 157,205           | 8,393                      | TBDSR      |
| 114 | Sulteng   | Kab. Donggala*)           | Palu          | 18.73    | 283,528           | 15,138                     | TBDR       |
| 115 | Sulteng   | Kab. Morowali             | Palu          | 18.73    |                   |                            |            |
| 116 | Sulteng   | Kab. Poso*)               | Palu          | 18.73    | 209,844           | 11,204                     | TBDSR      |
| 117 | Sultra    | Kab. Buton                | Kendari       | 12.56    | 222,167           | 17,688                     | TBDSD      |
| 118 | Sultra    | Kab. Kolaka               | Kendari       | 12.56    | 331,490           | 26,392                     | TBDSD      |
| 119 | Sulsel    | Kab. Luwu                 | Ujung Pandang | 11.77    | 565,946           | 48,084                     | TBDST      |
| 120 | Sulsel    | Kab. Majene               | Ujung Pandang | 11.77    | 138,909           | 11,802                     | TBDR       |
| 121 | Sulsel    | Kab. Pangkajene Kepulauan | Ujung Pandang | 11.77    | 208,450           | 17,710                     | TBDSD      |
| 122 | Sulsel    | Kab. Pinrang              | Ujung Pandang | 11.77    | 184,348           | 15,663                     | TBDR       |
| 123 | Sulsel    | Kab. Tana Toraja          | Ujung Pandang | 11.77    | 423,974           | 36,022                     | TBDT       |
| 124 | Sulsel    | Kota Parepare             | Ujung Pandang | 11.77    | 201,451           | 17,116                     | TBDSD      |
| 125 | NTB       | Kab. Bima                 | Mataram       | 14.76    | 208,900           | 14,153                     | TBDR       |
| 126 | NTB       | Kab. Lombok Barat         | Mataram       | 14.76    | 130,179           | 8,820                      | TBDSR      |
| 127 | NTB       | Kota Mataram              | Mataram       | 14.76    | 259,474           | 17,580                     | TBDSD      |
| 128 | NTT       | Kab. Ende                 | Kupang        | 12.34    | 190,156           | 15,410                     | TBDR       |
| 129 | NTT       | Kab. Flores Timur         | Kupang        | 12.34    | 174,649           | 14,153                     | TBDR       |
| 130 | NTT       | Kab. Timor Tengah Selatan | Kupang        | 12.34    | 484,563           | 39,268                     | TBDT       |
| 131 | NTT       | Kab. Timor Tengah Utara   | Kupang        | 12.34    | 186,065           | 15,078                     | TBDR       |
| 132 | NTT       | Kota Kupang               | Kupang        | 12.34    | 319,200           | 25,867                     | TBDSD      |
| 133 | Papua     | Kab. Fakfak               | Jayapura      | 14.00    | 1,058,849         | 75,632                     | TBDST      |
| 134 | Papua     | Kab. Manokwari            | Jayapura      | 14.00    | 346,285           | 24,735                     | TBDSD      |

Sumber : BPS IHK 2001, UMK/UMP2001 Kabupaten/Kota/Propinsi di Indonesia  
Susenar Kor 2000 BPS

Rata-rata : 24,001  
Standar : 12,585

**Keterangan :**

**TBD** : Singkatan dari Tenaga Kerja - Biaya - Biaya Aktual/IHK

Huruf setelah TBD : **ST** : Sangat Tinggi,

**T** : Tinggi

**SD** : Sedang

**R** : Rendah

**SR** : Sangat Rendah



Lampiran 4.2.3.3.

Variabel dan Indikator Produktivitas Tenaga Kerja

| No. | Propinsi | Kabupaten/Kota          | Nilai Tambah Manufaktur | Jumlah TK Sektor Manufaktur | Produktivitas Setahun | Intensitas |
|-----|----------|-------------------------|-------------------------|-----------------------------|-----------------------|------------|
| 1   | Sumut    | Kab. Asahan             | 3,171,760,030,000       | 22,025                      | 144,007,265.83        | TPPST      |
| 2   | Sumut    | Kab. Dairi              | 4,520,750,000           | 1,247                       | 3,625,300.72          | TPPR       |
| 3   | Sumut    | Kab. Deli Serdang       | 2,475,804,890,000       | 133,750                     | 18,510,690.77         | TPPSD      |
| 4   | Sumut    | Kab. Langkat            | 549,867,800,000         | 17,334                      | 31,721,922.23         | TPPT       |
| 5   | Sumut    | Kab. Simalungun         | 673,433,430,000         | 5,811                       | 115,889,421.79        | TPPST      |
| 6   | Sumut    | Kota Binjai             | 243,116,580,000         | 11,598                      | 20,961,939.99         | TPPSD      |
| 7   | Sumut    | Kota Medan              | 2,342,372,390,000       | 76,781                      | 30,507,187.85         | TPPT       |
| 8   | Sumut    | Kota Pematang Siantar   | 646,905,300,000         | 9,613                       | 67,294,840.32         | TPPST      |
| 9   | Sumut    | Kota Sibolga            | 62,014,730,000          | 1,101                       | 56,325,821.98         | TPPST      |
| 10  | Sumut    | Kota Tanjung Balai      | 177,469,570,000         | 4,715                       | 37,639,357.37         | TPPT       |
| 11  | Sumut    | Kota Tebing Tinggi      | 173,949,520,000         | 5,425                       | 32,064,427.65         | TPPT       |
| 12  | Sumbar   | Kab. Pesisir Selatan    | 156,400,260,000         | 4,296                       | 36,406,019.55         | TPPT       |
| 13  | Sumbar   | Kab. Sijunjung          | 89,519,130,000          | 14,990                      | 5,971,923.28          | TPPR       |
| 14  | Sumbar   | Kota Padang             | 1,147,244,970,000       | 23,299                      | 49,240,094.85         | TPPST      |
| 15  | Sumbar   | Kota Sawah Lunto        | 45,778,190,000          | 1,715                       | 26,692,822.16         | TPPT       |
| 16  | Riau     | Kab. Bengkalis          | 161,853,350,000         | 21,864                      | 7,402,732.80          | TPPR       |
| 17  | Riau     | Kab. Indragiri Hilir    | 239,292,080,000         | 7,448                       | 32,128,367.35         | TPPT       |
| 18  | Riau     | Kab. Kampar             | 79,115,630,000          | 9,720                       | 8,139,468.11          | TPPR       |
| 19  | Riau     | Kota Batam              | 4,614,239,910,000       | 47,626                      | 96,884,892.92         | TPPST      |
| 20  | Riau     | Kota Pekanbaru          | 192,832,940,000         | 16,989                      | 11,350,458.53         | TPPSD      |
| 21  | Jambi    | Kab. Batanghari         | 121,765,800,000         | 16,702                      | 7,290,492.16          | TPPR       |
| 22  | Jambi    | Kab. Bungo              | 38,588,870,000          | 5,689                       | 6,783,067.32          | TPPR       |
| 23  | Jambi    | Kab. Kerinci            | 44,196,160,000          | 4,834                       | 9,142,772.03          | TPPR       |
| 24  | Sumsel   | Kab. Muara Enim         | 328,767,000,000         | 10,763                      | 30,546,037.35         | TPPT       |
| 25  | Sumsel   | Kab. Musi Banyu Asin    | 2,266,100,000,000       | 30,156                      | 75,145,907.95         | TPPST      |
| 26  | Sumsel   | Kab. Musi Rawas         | 215,896,000,000         | 6,412                       | 33,670,617.59         | TPPT       |
| 27  | Sumsel   | Kab. Ogan Komiring Ilir | 291,799,000,000         | 21,790                      | 13,391,418.08         | TPPSD      |
| 28  | Sumsel   | Kota Palembang          | 3,885,170,000,000       | 53,738                      | 72,298,373.59         | TPPST      |
| 29  | Babel    | Kab. Bangka             | 1,236,362,000,000       | 19,475                      | 63,484,569.96         | TPPST      |
| 30  | Babel    | Kota Pangkal Pinang     | 72,886,000,000          | 3,596                       | 20,268,631.81         | TPPSD      |
| 31  | Bengkulu | Kab. Bengkulu Selatan   | 9,743,000,000           | 3,679                       | 2,648,273.99          | TPPR       |
| 32  | Bengkulu | Kota Bengkulu           | 27,281,000,000          | 2,862                       | 9,532,145.35          | TPPR       |
| 33  | Lampung  | Kab. Lampung Barat      | 27,360,000,000          | 1,310                       | 20,885,496.18         | TPPSD      |
| 34  | Lampung  | Kab. Lampung Selatan    | 411,567,000,000         | 34,522                      | 11,921,875.91         | TPPSD      |
| 35  | Lampung  | Kab. Lampung Timur      | 168,038,000,000         | 153,115                     | 1,097,462.69          | TPPR       |
| 36  | Lampung  | Kota Bandar Lampung     | 1,437,168,000,000       | 34,240                      | 41,973,364.49         | TPPST      |
| 37  | Banten   | Kab. Lebak              | 251,121,420,000         | 10,975                      | 22,881,222.78         | TPPSD      |
| 38  | Banten   | Kab. Serang             | 3,404,543,000,000       | 99,107                      | 34,352,195.10         | TPPT       |
| 39  | Banten   | Kab. Tangerang          | 7,086,959,560,000       | 246,839                     | 28,710,858.33         | TPPT       |
| 40  | Banten   | Kota Tangerang          | 9,472,471,000,000       | 150,478                     | 62,949,208.52         | TPPST      |
| 41  | Jabar    | Kab. Bekasi             | 25,503,822,092,000      | 104,584                     | 243,859,692.61        | TPPST      |
| 42  | Jabar    | Kab. Bogor              | 5,224,309,990,000       | 294,702                     | 17,727,433.10         | TPPSD      |
| 43  | Jabar    | Kab. Ciamis             | 403,750,690,000         | 57,027                      | 7,079,991.76          | TPPR       |
| 44  | Jabar    | Kab. Cirebon            | 493,635,040,000         | 158,690                     | 3,110,687.76          | TPPR       |
| 45  | Jabar    | Kab. Garut              | 496,518,040,000         | 78,748                      | 6,305,151.11          | TPPR       |
| 46  | Jabar    | Kab. Indramayu          | 1,795,983,255,780       | 28,529                      | 62,952,899.01         | TPPST      |
| 47  | Jabar    | Kab. Karawang           | 2,268,664,000,000       | 126,836                     | 17,886,593.71         | TPPSD      |

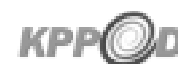

| No. | Propinsi | Kabupaten/Kota      | Nilai Tambah Manufaktur | Jumlah TK Sektor Manufaktur | Produktivitas Setahun | Intensitas |
|-----|----------|---------------------|-------------------------|-----------------------------|-----------------------|------------|
| 48  | Jabar    | Kab. Kuningan       | 62,938,410,000          | 18,991                      | 3,314,117.74          | TPPR       |
| 49  | Jabar    | Kab. Sukabumi       | 906,851,090,000         | 91,864                      | 9,871,669.97          | TPPR       |
| 50  | Jabar    | Kab. Sumedang       | 402,073,380,000         | 49,697                      | 8,090,496.01          | TPPR       |
| 51  | Jabar    | Kab. Tasik          | 440,063,220,000         | 147,974                     | 2,973,922.58          | TPPR       |
| 52  | Jabar    | Kota Bekasi         | 4,140,751,000,000       | 132,356                     | 31,284,951.19         | TPPT       |
| 53  | Jabar    | Kota Bogor          | 732,433,950,000         | 58,464                      | 12,527,947.97         | TPPSD      |
| 54  | Jabar    | Kota Cirebon        | 1,593,674,670,000       | 10,833                      | 147,112,957.63        | TPPST      |
| 55  | Jabar    | Kota Sukabumi       | 40,536,010,000          | 9,525                       | 4,255,749.08          | TPPR       |
| 56  | Jateng   | Kab. Kendal         | 1,441,708,930,000       | 42,909                      | 33,599,219.98         | TPPT       |
| 57  | Jateng   | Kab. Magelang       | 503,688,970,000         | 90,177                      | 5,585,559.18          | TPPR       |
| 58  | Jateng   | Kab. Pekalongan     | 773,008,281,000         | 120,304                     | 6,425,457.85          | TPPR       |
| 59  | Jateng   | Kab. Pemalang       | 453,147,395,000         | 69,951                      | 6,478,068.86          | TPPR       |
| 60  | Jateng   | Kab. Sukoharjo      | 663,653,090,000         | 83,891                      | 7,910,897.35          | TPPR       |
| 61  | Jateng   | Kab. Tegal          | 503,088,650,000         | 95,419                      | 5,272,415.87          | TPPR       |
| 62  | Jateng   | Kota Pekalongan     | 332,512,941,000         | 37,211                      | 8,935,877.59          | TPPR       |
| 63  | Jateng   | Kota Semarang       | 3,597,955,583,000       | 122,095                     | 29,468,492.43         | TPPT       |
| 64  | Jateng   | Kota Tegal          | 169,642,378,840         | 15,214                      | 11,150,412.70         | TPPSD      |
| 65  | DIY      | Kota Yogyakarta     | 390,069,000,000         | 17,809                      | 21,902,914.26         | TPPSD      |
| 66  | Jatim    | Kab. Bangkalan      | 64,309,440,000          | 23,254                      | 2,765,521.63          | TPPR       |
| 67  | Jatim    | Kab. Banyuwangi     | 211,573,150,000         | 62,436                      | 3,388,640.37          | TPPR       |
| 68  | Jatim    | Kab. Blitar         | 76,819,250,000          | 43,749                      | 1,755,908.71          | TPPR       |
| 69  | Jatim    | Kab. Kediri         | 374,200,000,000         | 80,177                      | 4,667,173.88          | TPPR       |
| 70  | Jatim    | Kab. Magetan        | 127,144,800,000         | 40,172                      | 3,165,010.46          | TPPR       |
| 71  | Jatim    | Kab. Mojokerto      | 836,587,320,000         | 94,564                      | 8,846,784.40          | TPPR       |
| 72  | Jatim    | Kab. Pamekasan      | 12,485,160,000          | 28,367                      | 440,129.73            | TPPSR      |
| 73  | Jatim    | Kab. Pasuruan       | 1,172,346,940,000       | 141,221                     | 8,301,505.73          | TPPR       |
| 74  | Jatim    | Kab. Sidoarjo       | 5,706,619,740,000       | 269,947                     | 21,139,778.33         | TPPSD      |
| 75  | Jatim    | Kota Kediri         | 10,462,400,500,000      | 23,293                      | 449,165,006.65        | TPPST      |
| 76  | Jatim    | Kota Malang         | 2,364,210,390,000       | 56,688                      | 41,705,658.87         | TPPST      |
| 77  | Jatim    | Kota Mojokerto      | 85,114,230,000          | 13,362                      | 6,369,872.03          | TPPR       |
| 78  | Jatim    | Kota Probolinggo    | 296,001,350,000         | 10,230                      | 28,934,638.32         | TPPT       |
| 79  | Jatim    | Kota Surabaya       | 14,081,654,480,000      | 254,402                     | 55,351,980.25         | TPPST      |
| 80  | Bali     | Kab. Badung         | 102,652,340,000         | 14,012                      | 7,326,030.55          | TPPR       |
| 81  | Bali     | Kab. Bangli         | 54,850,550,000          | 24,272                      | 2,259,828.20          | TPPR       |
| 82  | Bali     | Kab. Buleleng       | 195,334,750,000         | 18,737                      | 10,425,081.39         | TPPSD      |
| 83  | Bali     | Kab. Gianyar        | 437,852,000,000         | 76,756                      | 5,704,466.10          | TPPR       |
| 84  | Bali     | Kab. Jembrana       | 86,609,160,000          | 19,817                      | 4,370,447.60          | TPPR       |
| 85  | Bali     | Kab. Tabanan        | 107,300,410,000         | 21,408                      | 5,012,164.14          | TPPR       |
| 86  | Bali     | Kota Denpasar       | 383,960,720,000         | 29,030                      | 13,226,342.40         | TPPSD      |
| 87  | Kalbar   | Kab. Kapuas Hulu    | 12,343,130,000          | 2,235                       | 5,522,653.24          | TPPR       |
| 88  | Kalbar   | Kab. Ketapang       | 276,766,550,000         | 22,894                      | 12,089,042.98         | TPPSD      |
| 89  | Kalbar   | Kab. Pontianak      | 1,836,792,310,000       | 30,329                      | 60,562,244.39         | TPPST      |
| 90  | Kalbar   | Kab. Sambas         | 195,046,850,000         | 41,029                      | 4,753,877.75          | TPPR       |
| 91  | Kalbar   | Kab. Sanggau        | 589,747,390,000         | 9,339                       | 63,148,879.97         | TPPST      |
| 92  | Kalteng  | Kab. Barito Selatan | 51,769,630,000          | 3,500                       | 14,791,322.86         | TPPSD      |
| 93  | Kalteng  | Kab. Barito Utara   | 21,111,770,000          | 1,329                       | 15,885,455.23         | TPPSD      |
| 94  | Kalteng  | Kab. Kapuas         | 164,992,100,000         | 11,189                      | 14,745,920.10         | TPPSD      |



| No. | Propinsi  | Kabupaten/Kota            | Nilai Tambah Manufaktur | Jumlah TK Sektor Manufaktur | Produktivitas Setahun | Intensitas |
|-----|-----------|---------------------------|-------------------------|-----------------------------|-----------------------|------------|
| 95  | Kalsel    | Kab. Hulu Sungai Selatan  | 46,629,383,000          | 12,489                      | 3,733,636.24          | TPPR       |
| 96  | Kalsel    | Kab. Hulu Sungai Utara    | 70,408,255,000          | 6,029                       | 11,678,264.22         | TPPSD      |
| 97  | Kalsel    | Kab. Hulu Sungai Tengah   | 54,597,928,000          | 28,767                      | 1,897,936.11          | TPPR       |
| 98  | Kalsel    | Kab. Tabalong             | 17,259,797,000          | 3,235                       | 5,335,331.38          | TPPR       |
| 99  | Kalsel    | Kab. Tanah Laut           | 260,231,926,000         | 7,338                       | 35,463,603.98         | TPPT       |
| 100 | Kalsel    | Kab. Tapin                | 17,948,754,000          | 6,824                       | 2,630,239.45          | TPPR       |
| 101 | Kaltim    | Kab. Berau                | 353,265,020,000         | 4,853                       | 72,793,121.78         | TPPST      |
| 102 | Kaltim    | Kab. Kutai                | 445,377,330,000         | 21,410                      | 20,802,304.06         | TPPSD      |
| 103 | Kaltim    | Kab. Pasir                | 215,751,939,000         | 8,788                       | 24,550,744.08         | TPPSD      |
| 104 | Kaltim    | Kota Balikpapan           | 3,520,342,797,000       | 16,878                      | 208,575,826.34        | TPPST      |
| 105 | Kaltim    | Kota Samarinda            | 1,938,723,340,000       | 37,560                      | 51,616,702.34         | TPPST      |
| 106 | Sulut     | Kab. Minahasa             | 245,631,615,758         | 11,014                      | 22,301,762.83         | TPPSD      |
| 107 | Sulut     | Kab. Sangiatalaut         | 27,132,000,000          | 5,294                       | 5,125,047.22          | TPPR       |
| 108 | Sulut     | Kota Bitung               | 199,265,000,000         | 5,955                       | 33,461,796.81         | TPPT       |
| 109 | Sulut     | Kota Manado               | 138,390,000,000         | 5,476                       | 25,272,096.42         | TPPT       |
| 110 | Gorontalo | Kab. Gorontalo            | 116,818,000,000         | 14,611                      | 7,995,209.09          | TPPR       |
| 111 | Gorontalo | Kota Gorontalo            | 26,420,633,279          | 4,851                       | 5,446,430.28          | TPPR       |
| 112 | Sulteng   | Kab. Banggai              | 69,808,319,668          | 10,389                      | 6,719,445.54          | TPPR       |
| 113 | Sulteng   | Kab. Tolitoli             | 49,002,276,765          | 7,730                       | 6,339,233.73          | TPPR       |
| 114 | Sulteng   | Kab. Donggala*)           | 133,854,130,000         | 8,367                       | 15,997,864.23         | TPPSD      |
| 115 | Sulteng   | Kab. Morowali             | 27,783,441,630          | 1,159                       | 23,971,908.22         | TPPSD      |
| 116 | Sulteng   | Kab. Poso*)               | 81,693,699,607          | 7,946                       | 10,281,109.94         | TPPSD      |
| 117 | Sultra    | Kab. Buton                | 56,157,650,000          | 15,637                      | 3,591,331.46          | TPPR       |
| 118 | Sultra    | Kab. Kolaka               | 364,675,670,000         | 2,948                       | 123,702,737.45        | TPPST      |
| 119 | Sulsel    | Kab. Luwu                 | 86,618,350,000          | 10,924                      | 7,929,178.87          | TPPR       |
| 120 | Sulsel    | Kab. Majene               | 16,291,210,000          | 2,111                       | 7,717,295.12          | TPPR       |
| 121 | Sulsel    | Kab. Pangkajene Kepulauan | 662,832,010,000         | 5,636                       | 117,606,815.12        | TPPST      |
| 122 | Sulsel    | Kab. Pinrang              | 61,041,260,000          | 2,791                       | 21,870,748.84         | TPPSD      |
| 123 | Sulsel    | Kab. Tana Toraja          | 33,502,790,000          | 3,838                       | 8,729,231.37          | TPPR       |
| 124 | Sulsel    | Kota Parepare             | 14,229,760,000          | 2,837                       | 5,015,777.23          | TPPR       |
| 125 | NTB       | Kab. Bima                 | 37,972,421,000          | 8,825                       | 4,302,823.91          | TPPR       |
| 126 | NTB       | Kab. Lombok Barat         | 49,973,208,000          | 34,431                      | 1,451,401.59          | TPPR       |
| 127 | NTB       | Kota Mataram              | 122,176,035,000         | 9,502                       | 12,857,928.33         | TPPSD      |
| 128 | NTT       | Kab. Ende                 | 7,599,212,000           | 22,876                      | 332,191.47            | TPPSR      |
| 129 | NTT       | Kab. Flores Timur         | 2,944,249,000           | 2,308                       | 1,275,671.14          | TPPR       |
| 130 | NTT       | Kab. Timor Tengah Selatan | 4,585,236,629           | 836                         | 5,484,732.81          | TPPR       |
| 131 | NTT       | Kab. Timor Tengah Utara   | 4,841,908,423           | 5,426                       | 892,353.19            | TPPSR      |
| 132 | NTT       | Kota Kupang               | 44,611,724,236          | 4,525                       | 9,858,944.58          | TPPR       |
| 133 | Papua     | Kab. Fakfak               | 73,287,590,000          | 461                         | 158,975,249.46        | TPPST      |
| 134 | Papua     | Kab. Manokwari            | 50,433,800,000          | 3,001                       | 16,805,664.78         | TPPSD      |

Sumber : BPS, PDRB Atas Dasar Harga Berlaku, Susenas Kor 2000 BPS

Rata-rata : 30,059,176.63  
Standev : 53,686,108.76

**Keterangan :**

**TPP** : Singkatan dari Tenaga Kerja - Produktivitas - Tenaga Kerja

Huruf setelah TPP : **ST** : Sangat Tinggi,

**T** : Tinggi

**SD** : Sedang

**R** : Rendah

**SR** : Sangat Rendah



Lampiran 4.3.

Hirarki dan Bobot Faktor, Variabel, Indikator, Intensitas Pemeringkat

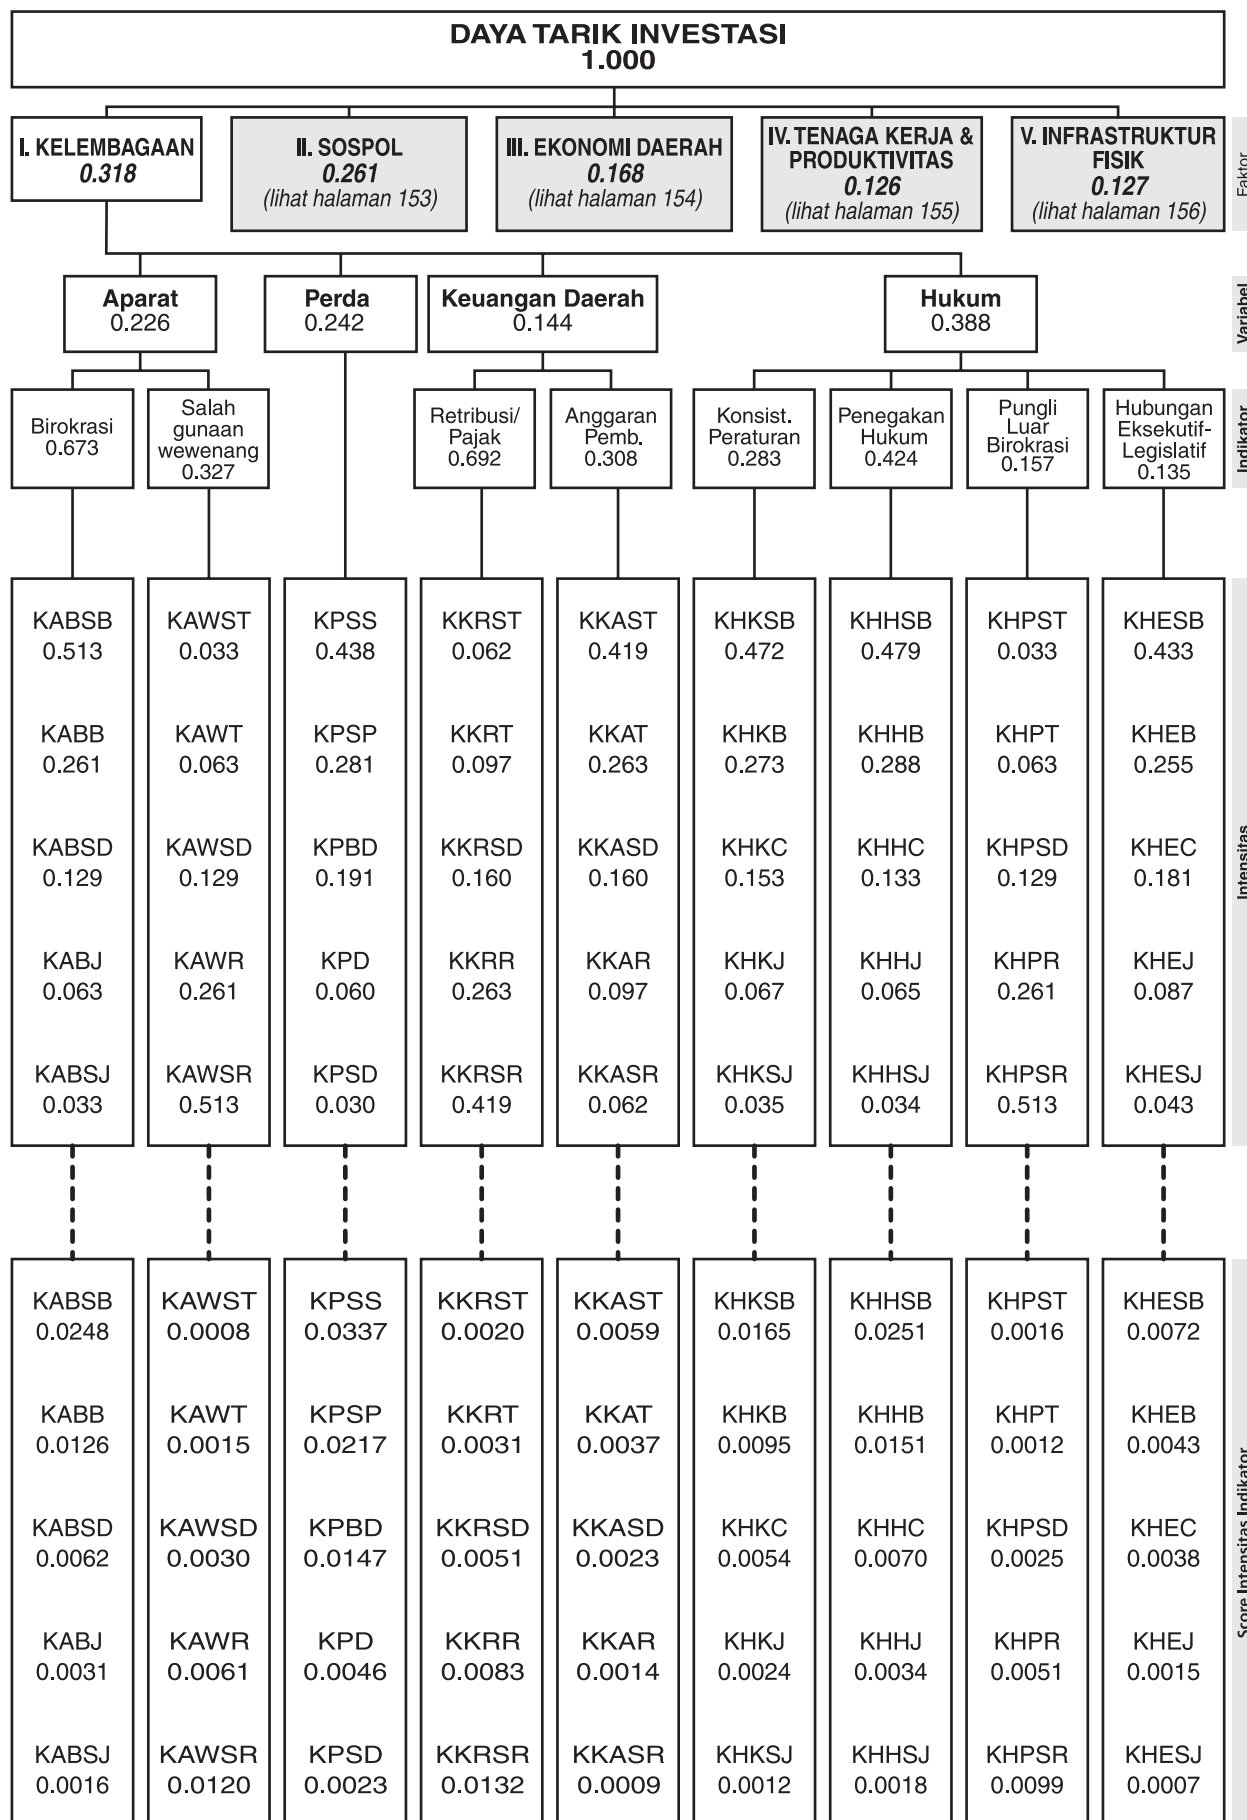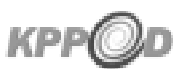

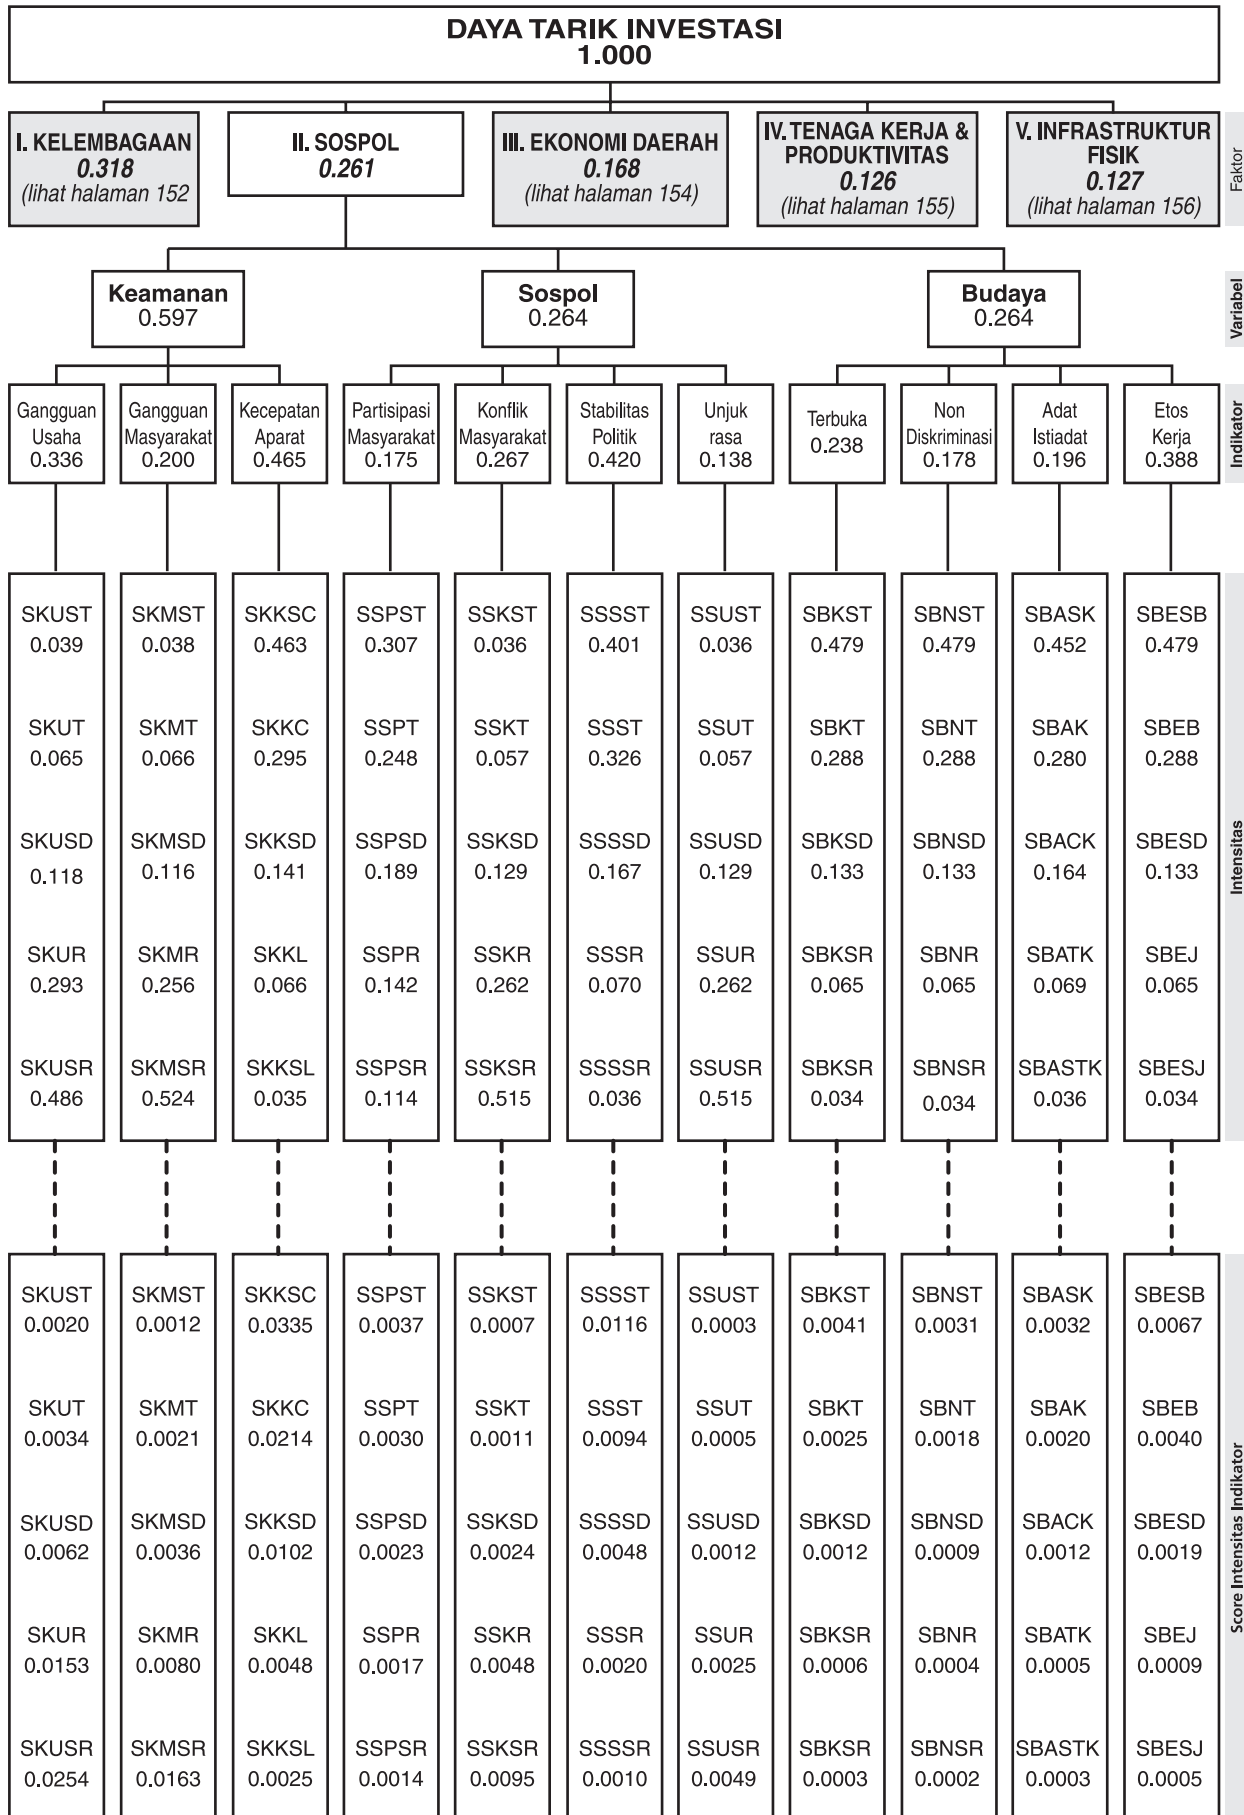

Faktor

Variabel

Indikator

Intensitas

Score Intensitas Indikator

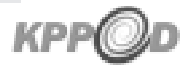

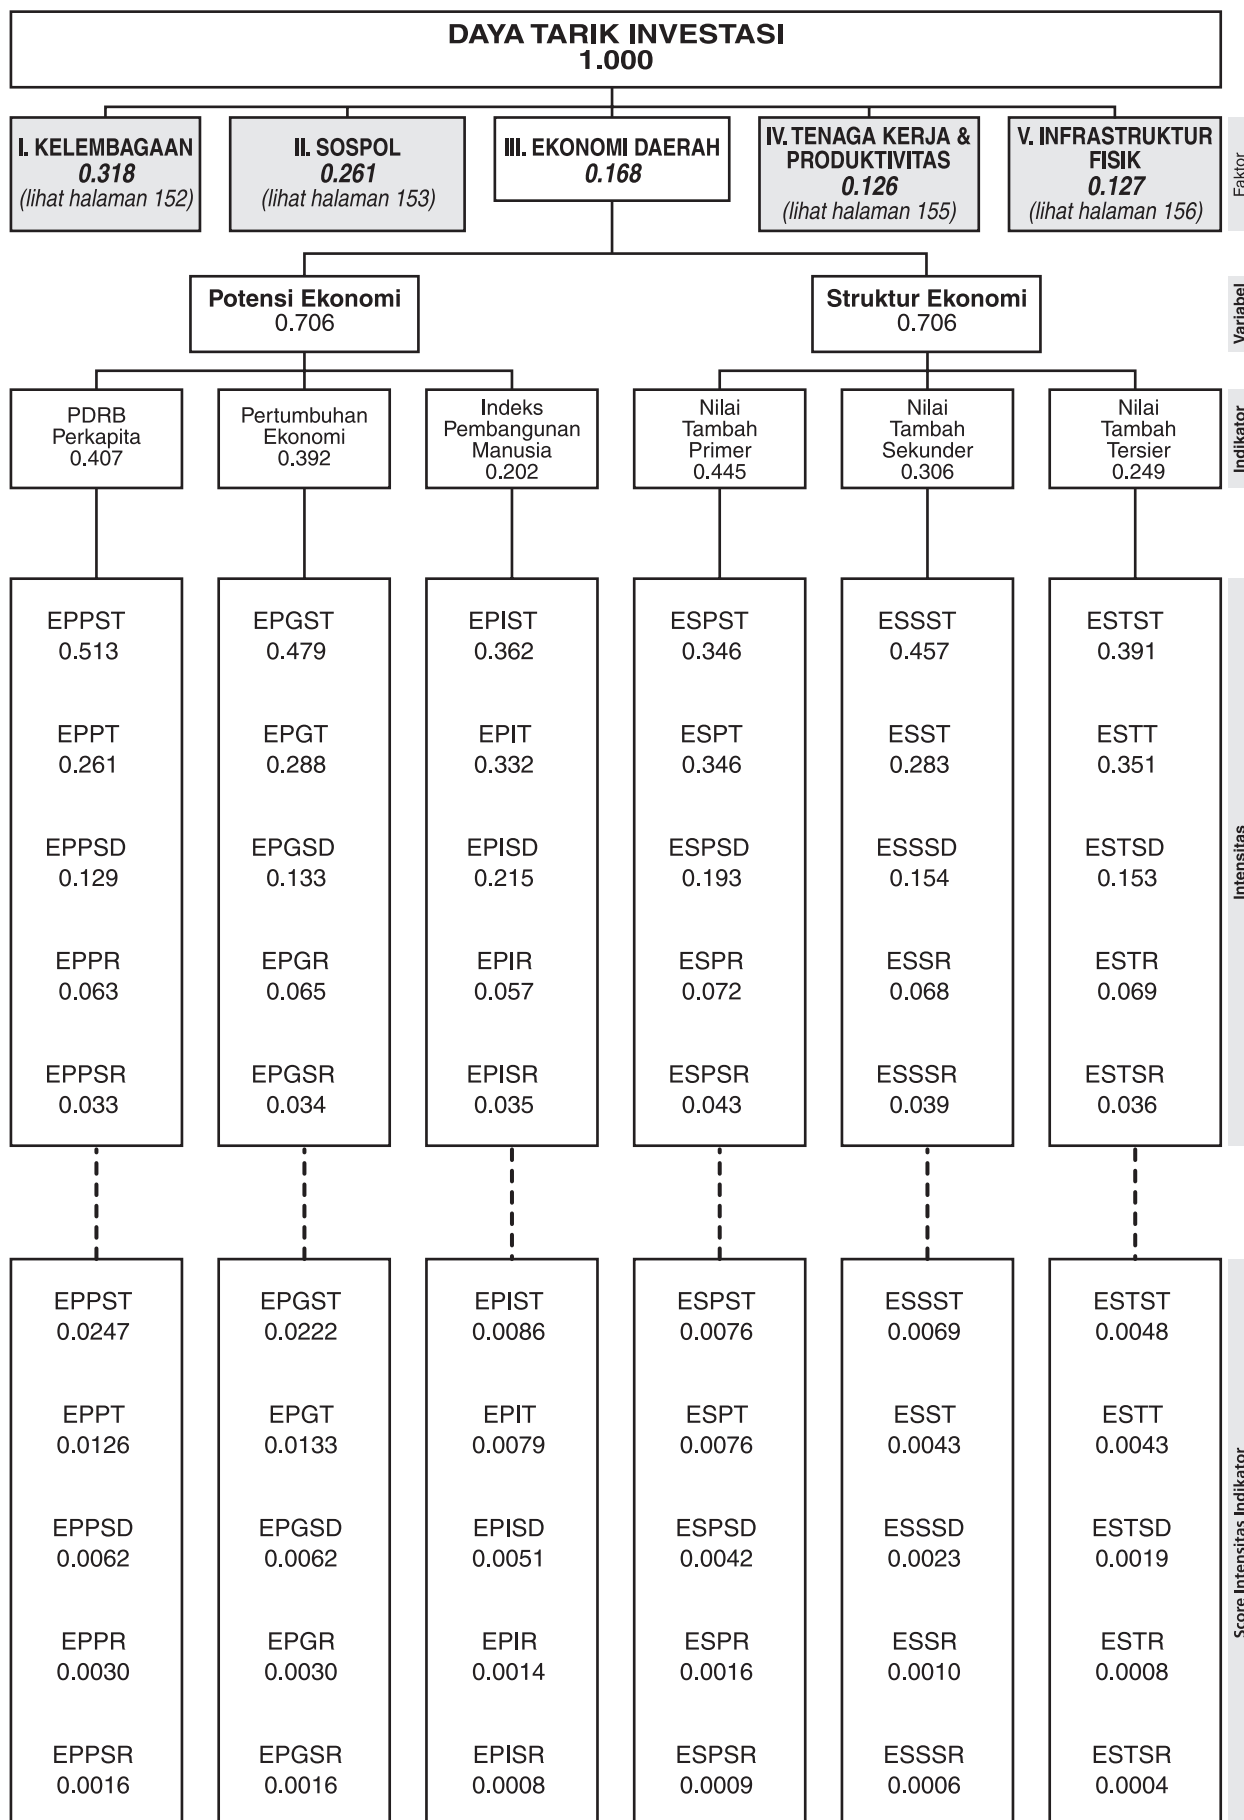



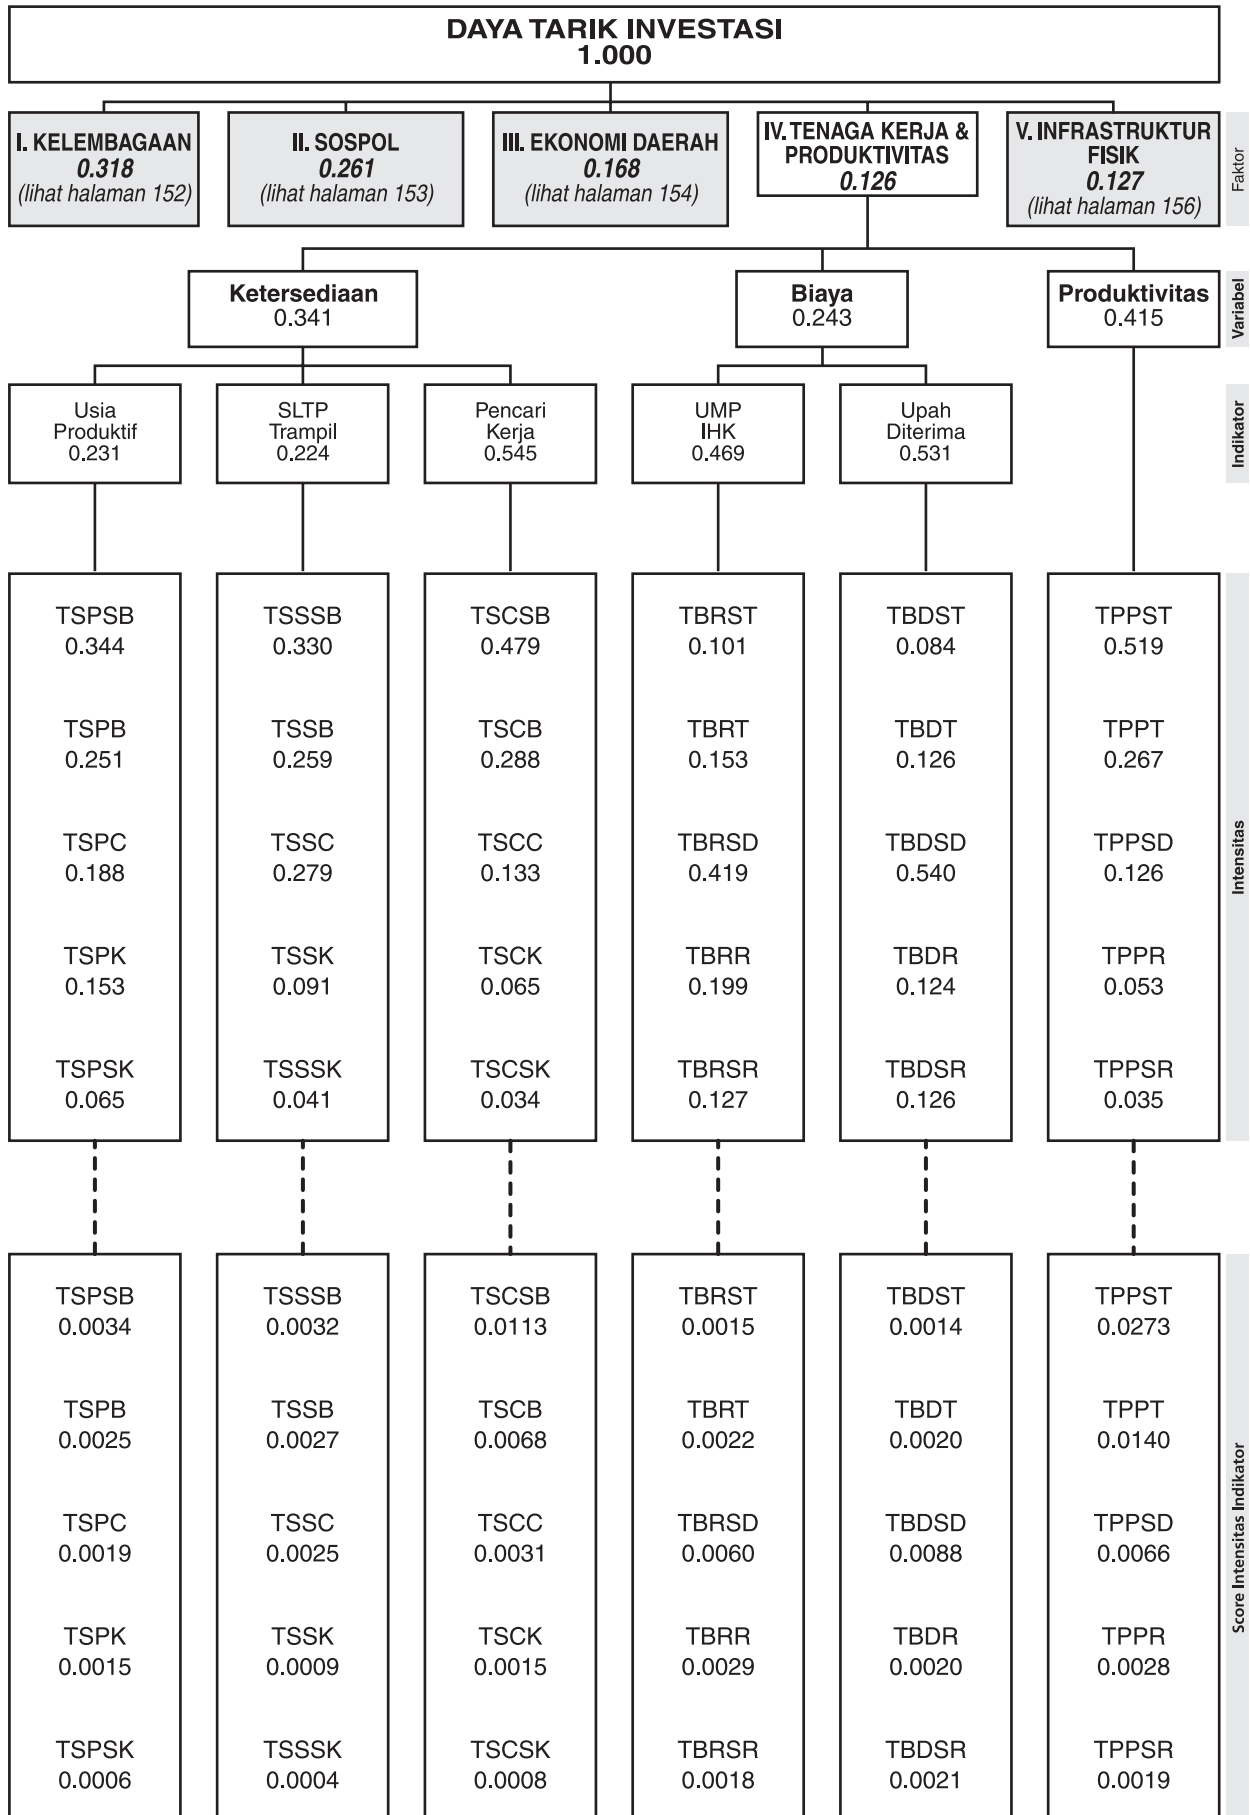

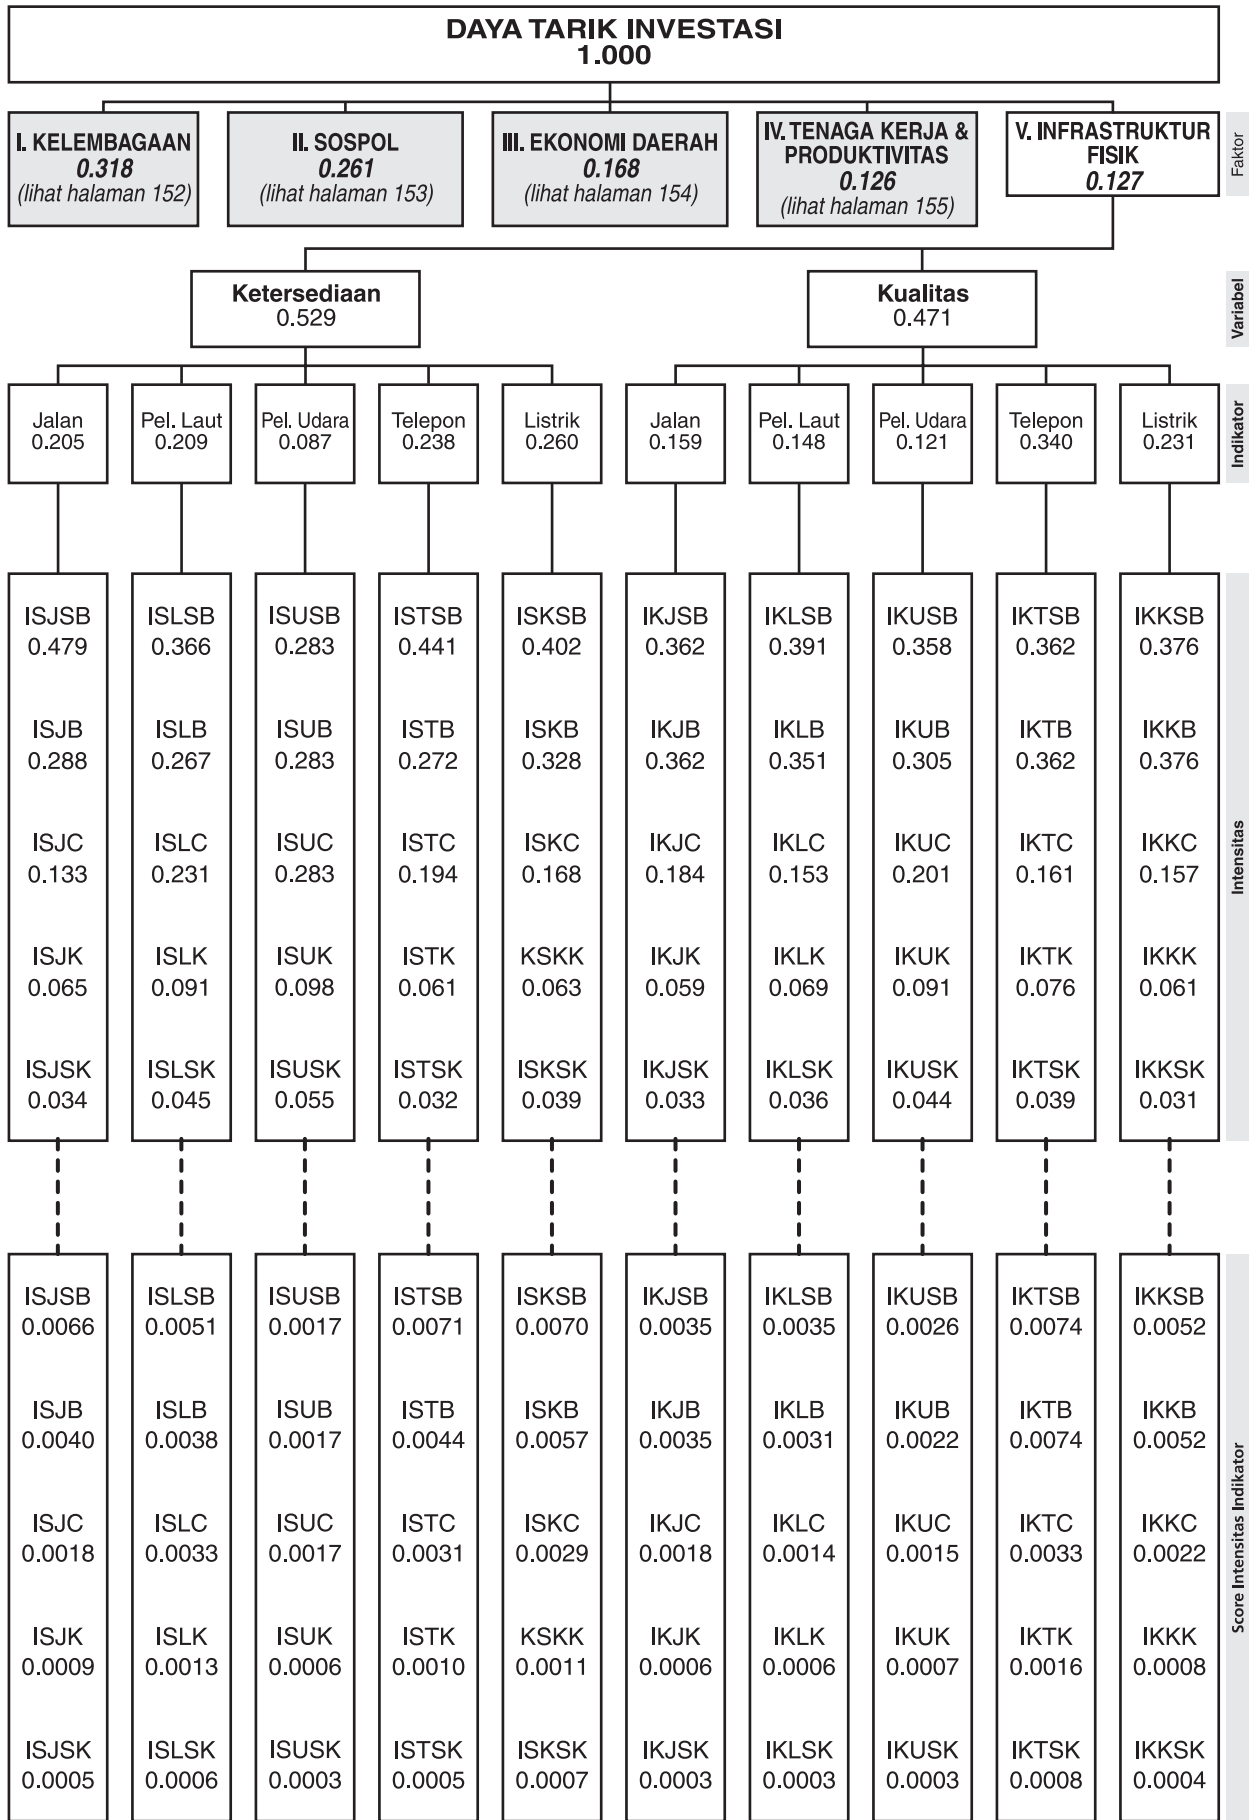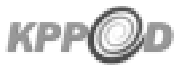

*Lampiran / Appendix 4.4.*  
*Perhitungan Nilai Intensitas Indikator Dengan Metode AHP /*  
*Calculation of the Value of Indicators Using AHP Method*

Sebagaimana disampaikan dalam laporan penelitian pada Bab.III.B.3.1.3. dalam Kerangka Pemikiran; indikator pemeringkatan ditentukan melalui studi literatur, lokakarya terbatas para ahli, dan hasil pemeringkatan KPPOD tahun 2001. Hasil tersebut diolah lagi oleh sejumlah ahli terbatas dalam suatu panel judgment yang menghasilkan hasil akhir indikator dan hirarki pemeringkatan.

Selanjutnya dengan pengolahan hasil pembobotan indikator dari judgement para ahli sebagaimana dijelaskan pada bagian III.3.1.1. ditentukan bobot indikator (skala penting tidaknya tiap indikator) terhadap daya tarik investasi suatu daerah, sebagaimana ditampilkan hasilnya dalam bagan *lampiran 4.3*.

Dalam bagan hirarki pemeringkatan pada lampiran 4.3 kita bisa lihat 5 faktor penentu daya tarik investasi suatu daerah, dilengkapi dengan bobotnya masing masing. Apabila kita jumlahkan keseluruhan bobot masing masing faktor (level pertama dari hirarki pemeringkatan) maka jumlah yang dihasilkan harus 1 (satu).

Demikian juga dengan jumlah bobot seluruh variabel yang tercakup dalam faktor yang sama (level kedua hirarki pemeringkatan) harus berjumlah 1 (satu).

Hal yang sama juga berlaku untuk bobot indikator indikator dalam satu variabel yang sama (level ketiga hirarki pemeringkatan) juga harus berjumlah 1 (satu).

Terakhir, bobot intensitas intensitas dalam tiap indikator yang sama (level keempat hirarki pemeringkatan) juga berjumlah 1 (satu).

Bila kita melihat pada turunan selanjutnya dibawah level intensitas (untuk memudahkan, sebut saja level kelima); maka kita akan melihat bahwa **nilai intensitas (bukan bobot intensitas)** yang terlihat pada level kelima, contoh untuk **indikator birokrasi** dengan intensitas **KABSB** (singkatan dari Kelembagaan – Aparat – Birokrasi – Sangat Baik) adalah **0.0248**. Jumlah keseluruhan nilai intensitas tertinggi untuk setiap indikator dari 42 (empat puluh dua) indikator pemeringkatan adalah 1 (satu).

Dengan mengambil contoh **indikator birokrasi** di atas, nilai intensitas tersebut dapat dijelaskan sebagai berikut:

1. Nilai **0.0248** adalah nilai intensitas KABSB dimana untuk indikator '**Birokrasi**' yang dinilai '**sangat baik**' akan menghasilkan nilai 0.0248. Sedangkan bila untuk indikator yang sama dinilai '**sangat jelek**'

*As discussed in the body of this research report particularly in part III.B.3.1.3., indicators were determined and developed through study of literature, experts' choice, and KPPOD's research result in 2001. The result was conferred with several experts through panel judgement then producing the final indicators and their structure.*

*Afterwards, the structure of indicators produced by experts through panel judgment as explained in part III.3.1.1. was then valued (the level of the importance of each indicator) to measure the level of attractiveness of an area to investment, as presented in graph 4.3.*

*The hierarchy of values of factors, variables, and indicators in graph 4.3. illustrates the five significant factors determining the attractiveness of an area to investment and the weight assigned to each. The total weight of all factors (the first level in the hierarchy) is 1 (one).*

*Likewise the total weight of all variables under similar factor (the second level in the hierarchy) is 1 (one).*

*The same process applies for the value of indicators under one variable (the third level in the hierarchy) wherein the total weight is 1 (one).*

*The total weight for the intensity assigned to each indicator (the fourth level in the hierarchy) was likewise set at one.*

*Looking at the next level, below the intensity level (to make it simple, just call it the fifth level), we will find **intensity score (not intensity weight)** in the fifth level. For example, under **government service indicator** there is **KABSB** intensity (abbreviation of Institutional – Apparatus – Bureaucracy – Excellent), with a score of **0.0248**. The total of the entire intensity values for each indicator from 42 (forty-two) indicators is 1 (one).*

*Using the above **government service indicator** as sample, the score of its intensity is calculated as follows:*

1. The score **0.0248** is KABSB intensity score where "**Government Service**" indicator, which is valued '**excellent**', produces a score of 0.0248. While, if similar indicator, **KABSJ** (abbreviation of

KABSJ (singkatan dari Kelembagaan – Aparat – Birokrasi – **Sangat Jelek**) maka menghasilkan nilai **0.0016**.

2. Nilai **0.0248** tersebut didapat dari perkalian antar bobot:

$$\begin{aligned} & \text{intensitas} \times \text{indikator} \times \text{variabel} \times \text{faktor} \\ & 0.513 \times 0.673 \times 0.226 \times 0.318 = 0.0248 \end{aligned}$$

3. Pada lampiran 4.5.1. nilai 0.0062 pada indikator '**Birokrasi**' dari **Kota Sawahlunto** yang dinilai '**baik**' dengan notasi KABB (singkatan dari Kelembagaan – Aparat – Birokrasi – Baik), didapat dari perkalian antar bobot:

$$\begin{aligned} & \text{intensitas} \times \text{indikator} \times \text{variabel} \times \text{faktor} \\ & 0.126 \times 0.673 \times 0.226 \times 0.318 = 0.0062 \end{aligned}$$

*(Catatan: perbedaan digit hanya karena faktor pembulatan)*

Penghitungan dengan cara yang sama juga dilakukan pada intensitas dari indikator indikator lainnya untuk menghasilkan nilai intensitas tiap indikator pemeringkatan.

Jumlah kumulatif nilai intensitas dari ke 42 (empat puluh dua) indikator pemeringkatan menghasilkan nilai total, yang kemudian dibandingkan antar daerah untuk mendapatkan hasil urutan peringkat total. Bila suatu daerah mendapatkan nilai intensitas tertinggi untuk tiap indikator dari semua 42 (empat puluh dua) indikator pemeringkatan, maka nilai totalnya harus 1 (satu).

Untuk peringkat per kategori maka nilai intensitas yang dijumlahkan berdasarkan intensitas intensitas dari kategori spesifik yang dimaksud. Misalnya peringkat nilai Kelembagaan merupakan perbandingan nilai kumulatif dari indikator indikator yang masuk pada faktor Kelembagaan saja.

*Institutional – Apparatus – Bureaucracy – Extremely Bad), is valued 'extremely bad', it produces a score of **0.0016**.*

2. *The score **0.0248** is obtained by multiplying the weights for the following:*

$$\begin{aligned} & \text{intensity} \times \text{indicator} \times \text{variable} \times \text{factor} \\ & 0.513 \times 0.673 \times 0.226 \times 0.318 = 0.0248 \end{aligned}$$

3. *In Appendix 5.1.1. the score 0.0062 given to 'Government Service' indicator for Sawahlunto City equivalent to 'good' rating under KABB (which stands for Institutional Factor – Apparatus – Bureaucracy – Good), was obtained by multiplying the weights of the following:*

$$\begin{aligned} & \text{intensity} \times \text{indicator} \times \text{variable} \times \text{factor} \\ & 0.126 \times 0.673 \times 0.226 \times 0.318 = 0.0062 \end{aligned}$$

*(Note: the product was rounded off)*

*The same calculation was done for the intensity of other indicators to produce intensity score of each indicator.*

*The total cumulative intensity score of 42 (forty-two) indicators represents the total score, which is used in the comparison between one area to other areas to get the ranking of total score. An area that obtained the highest intensity score for all 42 (forty-two) indicators was given a total score of 1 (one).*

*Ranking per specific factor was done through calculation of the intensity score of intended factor. For example, the ranking in terms of institutional factor was conducted by comparing the cumulative score of indicators under the institutional factor.*



Lampiran 4.5.

Hasil Pembobotan Intensitas Indikator dengan Metode AHP

Lampiran 4.5.1. Hasil Pembobotan Intensitas Indikator-Indikator Faktor Kelembagaan dengan Metode AHP

| NO.    | PROPINSI         | KABUPATEN/KOTA                      | KELEMBAGAAN          |                         |                              |                  |                 |             |                           |                       |                 |                       |                        |                           | TOTAL SCORE |
|--------|------------------|-------------------------------------|----------------------|-------------------------|------------------------------|------------------|-----------------|-------------|---------------------------|-----------------------|-----------------|-----------------------|------------------------|---------------------------|-------------|
|        |                  |                                     | Aparatur & Pelayanan |                         |                              | Peraturan Daerah | Keuangan Daerah |             |                           | Kepastian Hukum       |                 |                       |                        |                           |             |
|        |                  |                                     | Birokrasi            | Penyalahgunaan wewenang | Sub Total Aparat & Pelayanan |                  | Retribusi/Pajak | Pemb./ APBD | Sub Total Keuangan Daerah | Konsistensi Peraturan | Penegakan Hukum | Pungli Luar Birokrasi | Eksekutif - Legislatif | Sub Total Kepastian Hukum |             |
| 0.0483 | 0.0235           | 0.0771                              | 0.0316               | 0.0141                  | 0.035                        | 0.0524           | 0.0194          | 0.0167      | 0.0100                    | 0.3181                |                 |                       |                        |                           |             |
| 1      | SUMATERA UTARA   | (105) KAB. DELI SERDANG (112)       | 0.0031               | 0.0015                  | 0.0046                       | 0.0046           | 0.0083          | 0.0014      | 0.0097                    | 0.0024                | 0.0034          | 0.0012                | 0.0030                 | 0.0100                    | 0.0289      |
| 2      | SUMATERA UTARA   | (109) KAB. LANGKAT (110)            | 0.0031               | 0.0015                  | 0.0046                       | 0.0046           | 0.0083          | 0.0023      | 0.0106                    | 0.0024                | 0.0034          | 0.0012                | 0.0030                 | 0.0100                    | 0.0298      |
| 3      | SUMATERA UTARA   | (89) KAB. SIMALUNGUN (101)          | 0.0062               | 0.0015                  | 0.0077                       | 0.0046           | 0.0083          | 0.0023      | 0.0106                    | 0.0024                | 0.0070          | 0.0012                | 0.0030                 | 0.0136                    | 0.0365      |
| 4      | SUMATERA UTARA   | (77) KOTA TEBING TINGGI (95)        | 0.0062               | 0.0030                  | 0.0092                       | 0.0046           | 0.0083          | 0.0023      | 0.0106                    | 0.0054                | 0.0034          | 0.0025                | 0.0030                 | 0.0143                    | 0.0387      |
| 5      | SUMATERA UTARA   | (61) KOTA TANJUNG BALAI (94)        | 0.0062               | 0.0030                  | 0.0092                       | 0.0046           | 0.0051          | 0.0059      | 0.0110                    | 0.0054                | 0.0034          | 0.0025                | 0.0030                 | 0.0143                    | 0.0391      |
| 6      | SUMATERA UTARA   | (90) KOTA BINJAI (79)               | 0.0062               | 0.0015                  | 0.0077                       | 0.0147           | 0.0051          | 0.0023      | 0.0074                    | 0.0054                | 0.0034          | 0.0025                | 0.0030                 | 0.0143                    | 0.0441      |
| 7      | SUMATERA UTARA   | (54) KOTA MEDAN (71)                | 0.0062               | 0.0015                  | 0.0077                       | 0.0147           | 0.0083          | 0.0014      | 0.0097                    | 0.0054                | 0.0034          | 0.0025                | 0.0030                 | 0.0143                    | 0.0464      |
| 8      | SUMATERA UTARA   | (49) KOTA PEMATANG SIANTAR (68)     | 0.0062               | 0.0015                  | 0.0077                       | 0.0147           | 0.0051          | 0.0023      | 0.0074                    | 0.0054                | 0.0070          | 0.0025                | 0.0030                 | 0.0179                    | 0.0477      |
| 9      | SUMATERA UTARA   | (13) KOTA SIBOLGA (63)              | 0.0062               | 0.0015                  | 0.0077                       | 0.0147           | 0.0020          | 0.0037      | 0.0057                    | 0.0054                | 0.0034          | 0.0051                | 0.0072                 | 0.0211                    | 0.0492      |
| 10     | SUMATERA UTARA   | (29) KAB. ASAHAN (55)               | 0.0062               | 0.0015                  | 0.0077                       | 0.0046           | 0.0132          | 0.0023      | 0.0155                    | 0.0054                | 0.0151          | 0.0012                | 0.0030                 | 0.0247                    | 0.0525      |
| 11     | SUMATERA UTARA   | (4) KAB. DAIRI (1)                  | 0.0248               | 0.0030                  | 0.0278                       | 0.0147           | 0.0031          | 0.0023      | 0.0054                    | 0.0165                | 0.0251          | 0.0051                | 0.0043                 | 0.0510                    | 0.0989      |
| 12     | SUMATERA BARAT   | (123) KAB. PESISIR SELATAN (114)    | 0.0031               | 0.0015                  | 0.0046                       | 0.0046           | 0.0020          | 0.0023      | 0.0043                    | 0.0012                | 0.0034          | 0.0012                | 0.0015                 | 0.0073                    | 0.0208      |
| 13     | SUMATERA BARAT   | (34) KOTA PADANG (87)               | 0.0031               | 0.0030                  | 0.0061                       | 0.0147           | 0.0083          | 0.0009      | 0.0092                    | 0.0024                | 0.0070          | 0.0012                | 0.0015                 | 0.0121                    | 0.0421      |
| 14     | SUMATERA BARAT   | (84) KAB. SAWAHLUNTO/SIJUNJUNG (81) | 0.0062               | 0.0015                  | 0.0077                       | 0.0147           | 0.0051          | 0.0023      | 0.0074                    | 0.0024                | 0.0070          | 0.0012                | 0.0030                 | 0.0136                    | 0.0434      |
| 15     | SUMATERA BARAT   | (2) KOTA SAWAH LUNTO (2)            | 0.0126               | 0.0008                  | 0.0134                       | 0.0147           | 0.0031          | 0.0023      | 0.0054                    | 0.0165                | 0.0251          | 0.0099                | 0.0072                 | 0.0587                    | 0.0922      |
| 16     | R I A U          | (5) KOTA BATAM (44)                 | 0.0126               | 0.0030                  | 0.0156                       | 0.0046           | 0.0083          | 0.0059      | 0.0142                    | 0.0095                | 0.0070          | 0.0025                | 0.0043                 | 0.0233                    | 0.0577      |
| 17     | R I A U          | (74) KAB. KAMPAR (23)               | 0.0062               | 0.0030                  | 0.0092                       | 0.0147           | 0.0051          | 0.0059      | 0.0110                    | 0.0095                | 0.0151          | 0.0025                | 0.0043                 | 0.0314                    | 0.0663      |
| 18     | R I A U          | (9) KOTA PEKAN BARU (20)            | 0.0126               | 0.0030                  | 0.0156                       | 0.0147           | 0.0051          | 0.0023      | 0.0074                    | 0.0095                | 0.0151          | 0.0025                | 0.0043                 | 0.0314                    | 0.0691      |
| 19     | R I A U          | (36) KAB. INDRAGIRI HILIR (19)      | 0.0062               | 0.0030                  | 0.0092                       | 0.0217           | 0.0020          | 0.0059      | 0.0079                    | 0.0095                | 0.0151          | 0.0025                | 0.0043                 | 0.0314                    | 0.0702      |
| 20     | R I A U          | (55) KAB. BENGKALIS (13)            | 0.0062               | 0.0030                  | 0.0092                       | 0.0147           | 0.0132          | 0.0059      | 0.0191                    | 0.0095                | 0.0151          | 0.0025                | 0.0043                 | 0.0314                    | 0.0744      |
| 21     | J A M B I        | (41) KAB. BUNGOTEBO (11)            | 0.0248               | 0.0061                  | 0.0309                       | 0.0046           | 0.0020          | 0.0059      | 0.0079                    | 0.0095                | 0.0151          | 0.0025                | 0.0043                 | 0.0314                    | 0.0748      |
| 22     | J A M B I        | (35) KAB. KERINCI (5)               | 0.0248               | 0.0061                  | 0.0309                       | 0.0147           | 0.0051          | 0.0023      | 0.0074                    | 0.0095                | 0.0151          | 0.0025                | 0.0043                 | 0.0314                    | 0.0844      |
| 23     | J A M B I        | (23) KAB. BATANGHARI (3)            | 0.0248               | 0.0061                  | 0.0309                       | 0.0217           | 0.0020          | 0.0059      | 0.0079                    | 0.0095                | 0.0151          | 0.0025                | 0.0043                 | 0.0314                    | 0.0919      |
| 24     | SUMATERA SELATAN | (113) KAB. OGAN KOMERING ILIR (105) | 0.0031               | 0.0030                  | 0.0061                       | 0.0046           | 0.0051          | 0.0037      | 0.0088                    | 0.0054                | 0.0034          | 0.0025                | 0.0030                 | 0.0143                    | 0.0338      |
| 25     | SUMATERA SELATAN | (88) KAB. MUSI RAWAS (64)           | 0.0031               | 0.0030                  | 0.0061                       | 0.0217           | 0.0031          | 0.0037      | 0.0068                    | 0.0054                | 0.0034          | 0.0025                | 0.0030                 | 0.0143                    | 0.0489      |
| 26     | SUMATERA SELATAN | (12) KOTA PALEMBANG (54)            | 0.0062               | 0.0030                  | 0.0092                       | 0.0147           | 0.0083          | 0.0023      | 0.0106                    | 0.0054                | 0.0070          | 0.0025                | 0.0043                 | 0.0192                    | 0.0537      |

| NO. | PROPINSI         | KABUPATEN/KOTA                   | KELEMBAGAAN          |                                    |                                        |                            |                           |                       |                                     |                                 |                           |                                  |                                  | TOTAL SCORE<br>0.3181 |                                     |
|-----|------------------|----------------------------------|----------------------|------------------------------------|----------------------------------------|----------------------------|---------------------------|-----------------------|-------------------------------------|---------------------------------|---------------------------|----------------------------------|----------------------------------|-----------------------|-------------------------------------|
|     |                  |                                  | Aparatur & Pelayanan |                                    |                                        | Peraturan Daerah<br>0.0771 | Keuangan Daerah           |                       |                                     | Kepastian Hukum                 |                           |                                  |                                  |                       |                                     |
|     |                  |                                  | Birokrasi<br>0.0483  | Penyalah-gunaan wewenang<br>0.0235 | Sub Total Aparat & Pelayanan<br>0.0077 |                            | Retribusi/Pajak<br>0.0316 | Pemb./ APBD<br>0.0141 | Sub Total Keuangan Daerah<br>0.0155 | Konsistensi Peraturan<br>0.0095 | Penegakan Hukum<br>0.0524 | Pungji/ Luar Birokrasi<br>0.0194 | Eksekutif - Legislatif<br>0.0167 |                       | Sub Total Kepastian Hukum<br>0.0259 |
| 27  | SUMATERA SELATAN | (68) KAB. MUARA ENIM (54)        | 0.0062               | 0.0015                             | 0.0077                                 | 0.0046                     | 0.0132                    | 0.0023                | 0.0155                              | 0.0095                          | 0.0070                    | 0.0051                           | 0.0043                           | 0.0259                | 0.0537                              |
| 28  | SUMATERA SELATAN | (70) KAB. MUSI BANYUASIN (43)    | 0.0031               | 0.0030                             | 0.0061                                 | 0.0147                     | 0.0132                    | 0.0059                | 0.0191                              | 0.0054                          | 0.0070                    | 0.0025                           | 0.0030                           | 0.0179                | 0.0578                              |
| 29  | BANGKA BELITUNG  | (102) KOTA PANGKAL PINANG (111)  | 0.0062               | 0.0030                             | 0.0092                                 | 0.0046                     | 0.0031                    | 0.0023                | 0.0054                              | 0.0024                          | 0.0034                    | 0.0012                           | 0.0030                           | 0.0100                | 0.0292                              |
| 30  | BANGKA BELITUNG  | (59) KAB. BANGKA (72)            | 0.0062               | 0.0030                             | 0.0092                                 | 0.0147                     | 0.0083                    | 0.0037                | 0.0120                              | 0.0024                          | 0.0034                    | 0.0012                           | 0.0030                           | 0.0100                | 0.0459                              |
| 31  | BENGGULU         | (121) KAB. BENGGULU SELATAN (97) | 0.0062               | 0.0030                             | 0.0092                                 | 0.0046                     | 0.0051                    | 0.0014                | 0.0065                              | 0.0054                          | 0.0070                    | 0.0025                           | 0.0030                           | 0.0179                | 0.0382                              |
| 32  | BENGGULU         | (91) KOTA BENGGULU (66)          | 0.0062               | 0.0030                             | 0.0092                                 | 0.0147                     | 0.0051                    | 0.0014                | 0.0065                              | 0.0054                          | 0.0070                    | 0.0025                           | 0.0030                           | 0.0179                | 0.0483                              |
| 33  | LAMPUNG          | (125) KAB. LAMPUNG TIMUR (113)   | 0.0031               | 0.0015                             | 0.0046                                 | 0.0046                     | 0.0051                    | 0.0009                | 0.0060                              | 0.0024                          | 0.0034                    | 0.0012                           | 0.0015                           | 0.0085                | 0.0237                              |
| 34  | LAMPUNG          | (122) KAB. LAMPUNG SELATAN (106) | 0.0062               | 0.0030                             | 0.0092                                 | 0.0046                     | 0.0051                    | 0.0014                | 0.0065                              | 0.0024                          | 0.0070                    | 0.0006                           | 0.0015                           | 0.0115                | 0.0318                              |
| 35  | LAMPUNG          | (37) KOTA BANDAR LAMPUNG (73)    | 0.0062               | 0.0030                             | 0.0092                                 | 0.0147                     | 0.0083                    | 0.0014                | 0.0097                              | 0.0024                          | 0.0070                    | 0.0012                           | 0.0015                           | 0.0121                | 0.0457                              |
| 36  | LAMPUNG          | (43) KAB. LAMPUNG BARAT (18)     | 0.0062               | 0.0008                             | 0.0070                                 | 0.0147                     | 0.0051                    | 0.0037                | 0.0088                              | 0.0095                          | 0.0251                    | 0.0051                           | 0.0015                           | 0.0412                | 0.0717                              |
| 37  | BANTEN           | (57) KAB. SERANG (80)            | 0.0062               | 0.0008                             | 0.0070                                 | 0.0147                     | 0.0051                    | 0.0014                | 0.0065                              | 0.0024                          | 0.0034                    | 0.0025                           | 0.0072                           | 0.0155                | 0.0437                              |
| 38  | BANTEN           | (75) KAB. LEBAK (79)             | 0.0031               | 0.0030                             | 0.0061                                 | 0.0147                     | 0.0020                    | 0.0023                | 0.0043                              | 0.0054                          | 0.0070                    | 0.0051                           | 0.0015                           | 0.0190                | 0.0441                              |
| 39  | BANTEN           | (6) TA TANGERANG (50)            | 0.0062               | 0.0030                             | 0.0092                                 | 0.0147                     | 0.0083                    | 0.0037                | 0.0120                              | 0.0054                          | 0.0070                    | 0.0025                           | 0.0043                           | 0.0192                | 0.0551                              |
| 40  | BANTEN           | (30) KAB. TANGERANG (36)         | 0.0062               | 0.0015                             | 0.0077                                 | 0.0217                     | 0.0083                    | 0.0023                | 0.0106                              | 0.0054                          | 0.0070                    | 0.0025                           | 0.0043                           | 0.0192                | 0.0592                              |
| 41  | JAWA BARAT       | (115) KAB. CIREBON (99)          | 0.0062               | 0.0015                             | 0.0077                                 | 0.0046                     | 0.0051                    | 0.0023                | 0.0074                              | 0.0054                          | 0.0070                    | 0.0025                           | 0.0030                           | 0.0179                | 0.0376                              |
| 42  | JAWA BARAT       | (41) KOTA CIREBON (99)           | 0.0062               | 0.0015                             | 0.0077                                 | 0.0046                     | 0.0051                    | 0.0023                | 0.0074                              | 0.0054                          | 0.0070                    | 0.0025                           | 0.0030                           | 0.0179                | 0.0376                              |
| 43  | JAWA BARAT       | (65) KAB. KARAWANG (99)          | 0.0062               | 0.0015                             | 0.0077                                 | 0.0046                     | 0.0051                    | 0.0023                | 0.0074                              | 0.0054                          | 0.0070                    | 0.0025                           | 0.0030                           | 0.0179                | 0.0376                              |
| 44  | JAWA BARAT       | (107) KAB. SUKABUMI (98)         | 0.0031               | 0.0015                             | 0.0046                                 | 0.0046                     | 0.0083                    | 0.0023                | 0.0106                              | 0.0054                          | 0.0070                    | 0.0025                           | 0.0030                           | 0.0179                | 0.0377                              |
| 45  | JAWA BARAT       | (118) KAB. SUMEDANG (90)         | 0.0062               | 0.0015                             | 0.0077                                 | 0.0046                     | 0.0051                    | 0.0009                | 0.0060                              | 0.0095                          | 0.0070                    | 0.0025                           | 0.0030                           | 0.0220                | 0.0403                              |
| 46  | JAWA BARAT       | (73) KAB. INDRAMAYU (88)         | 0.0062               | 0.0015                             | 0.0077                                 | 0.0046                     | 0.0083                    | 0.0023                | 0.0106                              | 0.0054                          | 0.0070                    | 0.0025                           | 0.0030                           | 0.0179                | 0.0408                              |
| 47  | JAWA BARAT       | (47) KAB. BOGOR (86)             | 0.0062               | 0.0030                             | 0.0092                                 | 0.0046                     | 0.0083                    | 0.0023                | 0.0106                              | 0.0054                          | 0.0070                    | 0.0025                           | 0.0030                           | 0.0179                | 0.0423                              |
| 48  | JAWA BARAT       | (106) KAB. CIAMIS (82)           | 0.0062               | 0.0015                             | 0.0077                                 | 0.0147                     | 0.0020                    | 0.0009                | 0.0029                              | 0.0054                          | 0.0070                    | 0.0025                           | 0.0030                           | 0.0179                | 0.0432                              |
| 49  | JAWA BARAT       | (114) KAB. GARUT (82)            | 0.0031               | 0.0015                             | 0.0046                                 | 0.0147                     | 0.0051                    | 0.0009                | 0.0060                              | 0.0054                          | 0.0070                    | 0.0025                           | 0.0030                           | 0.0179                | 0.0432                              |
| 50  | JAWA BARAT       | (7) KAB. BEKASI (80)             | 0.0062               | 0.0030                             | 0.0092                                 | 0.0046                     | 0.0083                    | 0.0037                | 0.0120                              | 0.0054                          | 0.0070                    | 0.0025                           | 0.0030                           | 0.0179                | 0.0437                              |
| 51  | JAWA BARAT       | (119) KAB. TASIKMALAYA (78)      | 0.0062               | 0.0015                             | 0.0077                                 | 0.0147                     | 0.0031                    | 0.0009                | 0.0040                              | 0.0054                          | 0.0070                    | 0.0025                           | 0.0030                           | 0.0179                | 0.0443                              |
| 52  | JAWA BARAT       | (24) KOTA BOGOR (65)             | 0.0126               | 0.0030                             | 0.0156                                 | 0.0046                     | 0.0083                    | 0.0023                | 0.0106                              | 0.0054                          | 0.0070                    | 0.0025                           | 0.0030                           | 0.0179                | 0.0487                              |
| 53  | JAWA BARAT       | (60) KOTA SUKABUMI (59)          | 0.0062               | 0.0015                             | 0.0077                                 | 0.0147                     | 0.0020                    | 0.0023                | 0.0043                              | 0.0095                          | 0.0070                    | 0.0025                           | 0.0043                           | 0.0233                | 0.0500                              |
| 54  | JAWA BARAT       | (111) KAB. KUNINGAN (57)         | 0.0062               | 0.0015                             | 0.0077                                 | 0.0217                     | 0.0020                    | 0.0009                | 0.0029                              | 0.0054                          | 0.0070                    | 0.0025                           | 0.0030                           | 0.0179                | 0.0502                              |

| NO. | PROPINSI        | KABUPATEN/KOTA              | KELEMBAGAAN          |                                           |                                              |                            |                               |                          |                                           |                                    |                              |                                    |                                     | TOTAL SCORE<br>0.3181 |                                           |
|-----|-----------------|-----------------------------|----------------------|-------------------------------------------|----------------------------------------------|----------------------------|-------------------------------|--------------------------|-------------------------------------------|------------------------------------|------------------------------|------------------------------------|-------------------------------------|-----------------------|-------------------------------------------|
|     |                 |                             | Aparatur & Pelayanan |                                           |                                              | Peraturan Daerah<br>0.0771 | Keuangan Daerah               |                          |                                           | Kepastian Hukum                    |                              |                                    |                                     |                       |                                           |
|     |                 |                             | Birokrasi<br>0.0483  | Penyalah-<br>gunaan<br>wewenang<br>0.0235 | Sub Total<br>Aparat &<br>Pelayanan<br>0.0156 |                            | Retribusi/<br>Pajak<br>0.0316 | Pemb./<br>APBD<br>0.0141 | Sub Total<br>Keuangan<br>Daerah<br>0.0088 | Konsistensi<br>Peraturan<br>0.0054 | Penegakan<br>Hukum<br>0.0070 | Pungji Luar<br>Birokrasi<br>0.0194 | Eksekutif -<br>Legislatif<br>0.0167 |                       | Sub Total<br>Kepastian<br>Hukum<br>0.0179 |
| 55  | JAWA BARAT      | (22) KOTA BEKASI (28)       | 0.0126               | 0.0030                                    | 0.0156                                       | 0.0217                     | 0.0051                        | 0.0037                   | 0.0088                                    | 0.0054                             | 0.0070                       | 0.0025                             | 0.0030                              | 0.0179                | 0.0640                                    |
| 56  | JAWA TENGAH     | (50) KAB. SUKOHARJO (75)    | 0.0062               | 0.0030                                    | 0.0092                                       | 0.0046                     | 0.0083                        | 0.0009                   | 0.0092                                    | 0.0054                             | 0.0070                       | 0.0051                             | 0.0043                              | 0.0218                | 0.0448                                    |
| 57  | JAWA TENGAH     | (27) KAB. MAGELANG (33)     | 0.0062               | 0.0061                                    | 0.0123                                       | 0.0046                     | 0.0083                        | 0.0023                   | 0.0106                                    | 0.0095                             | 0.0151                       | 0.0051                             | 0.0043                              | 0.0340                | 0.0615                                    |
| 58  | JAWA TENGAH     | (28) KAB. TEGAL (29)        | 0.0062               | 0.0061                                    | 0.0123                                       | 0.0147                     | 0.0031                        | 0.0023                   | 0.0054                                    | 0.0095                             | 0.0151                       | 0.0025                             | 0.0043                              | 0.0314                | 0.0638                                    |
| 59  | JAWA TENGAH     | (19) KAB. PEKALONGAN (27)   | 0.0062               | 0.0061                                    | 0.0123                                       | 0.0147                     | 0.0051                        | 0.0009                   | 0.0060                                    | 0.0095                             | 0.0151                       | 0.0025                             | 0.0043                              | 0.0314                | 0.0644                                    |
| 60  | JAWA TENGAH     | (14) KOTA PEKALONGAN (21)   | 0.0062               | 0.0061                                    | 0.0123                                       | 0.0147                     | 0.0083                        | 0.0023                   | 0.0106                                    | 0.0095                             | 0.0151                       | 0.0025                             | 0.0043                              | 0.0314                | 0.0690                                    |
| 61  | JAWA TENGAH     | (3) KOTA TEGAL (15)         | 0.0126               | 0.0061                                    | 0.0187                                       | 0.0147                     | 0.0020                        | 0.0037                   | 0.0057                                    | 0.0095                             | 0.0151                       | 0.0051                             | 0.0043                              | 0.0340                | 0.0731                                    |
| 62  | JAWA TENGAH     | (1) KOTA SEMARANG (14)      | 0.0126               | 0.0030                                    | 0.0156                                       | 0.0217                     | 0.0083                        | 0.0059                   | 0.0142                                    | 0.0054                             | 0.0070                       | 0.0051                             | 0.0043                              | 0.0218                | 0.0733                                    |
| 63  | JAWA TENGAH     | (10) KAB. KENDAL (10)       | 0.0126               | 0.0015                                    | 0.0141                                       | 0.0046                     | 0.0051                        | 0.0009                   | 0.0060                                    | 0.0165                             | 0.0251                       | 0.0051                             | 0.0043                              | 0.0510                | 0.0757                                    |
| 64  | JAWA TENGAH     | (11) KAB. PEMALANG (7)      | 0.0126               | 0.0061                                    | 0.0187                                       | 0.0147                     | 0.0051                        | 0.0009                   | 0.0060                                    | 0.0165                             | 0.0151                       | 0.0051                             | 0.0043                              | 0.0410                | 0.0804                                    |
| 65  | D.I. YOGYAKARTA | (33) KOTA YOGYAKARTA (52)   | 0.0062               | 0.0030                                    | 0.0092                                       | 0.0217                     | 0.0083                        | 0.0009                   | 0.0092                                    | 0.0054                             | 0.0034                       | 0.0025                             | 0.0030                              | 0.0143                | 0.0544                                    |
| 66  | JAWA TIMUR      | (92) KOTA PROBOLINGGO (107) | 0.0031               | 0.0015                                    | 0.0046                                       | 0.0046                     | 0.0031                        | 0.0023                   | 0.0054                                    | 0.0054                             | 0.0070                       | 0.0012                             | 0.0030                              | 0.0166                | 0.0312                                    |
| 67  | JAWA TIMUR      | (87) KAB. BLITAR (102)      | 0.0062               | 0.0030                                    | 0.0092                                       | 0.0046                     | 0.0051                        | 0.0009                   | 0.0060                                    | 0.0054                             | 0.0070                       | 0.0012                             | 0.0030                              | 0.0166                | 0.0364                                    |
| 68  | JAWA TIMUR      | (96) KAB. MAGETAN (100)     | 0.0062               | 0.0030                                    | 0.0092                                       | 0.0046                     | 0.0051                        | 0.0014                   | 0.0065                                    | 0.0054                             | 0.0070                       | 0.0012                             | 0.0030                              | 0.0166                | 0.0369                                    |
| 69  | JAWA TIMUR      | (72) KAB. MOJOKERTO (92)    | 0.0031               | 0.0015                                    | 0.0046                                       | 0.0046                     | 0.0083                        | 0.0014                   | 0.0097                                    | 0.0095                             | 0.0070                       | 0.0012                             | 0.0030                              | 0.0207                | 0.0396                                    |
| 70  | JAWA TIMUR      | (18) KOTA SURABAYA (91)     | 0.0031               | 0.0061                                    | 0.0092                                       | 0.0046                     | 0.0083                        | 0.0023                   | 0.0106                                    | 0.0054                             | 0.0070                       | 0.0025                             | 0.0007                              | 0.0156                | 0.0400                                    |
| 71  | JAWA TIMUR      | (120) KAB. PAMEKASAN (89)   | 0.0031               | 0.0015                                    | 0.0046                                       | 0.0147                     | 0.0031                        | 0.0014                   | 0.0045                                    | 0.0054                             | 0.0070                       | 0.0012                             | 0.0030                              | 0.0166                | 0.0404                                    |
| 72  | JAWA TIMUR      | (99) KAB. BANYUWANGI (85)   | 0.0031               | 0.0015                                    | 0.0046                                       | 0.0147                     | 0.0051                        | 0.0014                   | 0.0065                                    | 0.0054                             | 0.0070                       | 0.0012                             | 0.0030                              | 0.0166                | 0.0424                                    |
| 73  | JAWA TIMUR      | (112) KAB. BANGKALAN (85)   | 0.0031               | 0.0015                                    | 0.0046                                       | 0.0147                     | 0.0051                        | 0.0014                   | 0.0065                                    | 0.0054                             | 0.0070                       | 0.0012                             | 0.0030                              | 0.0166                | 0.0424                                    |
| 74  | JAWA TIMUR      | (8) KOTA KEDIRI (75)        | 0.0031               | 0.0015                                    | 0.0046                                       | 0.0046                     | 0.0083                        | 0.0014                   | 0.0097                                    | 0.0095                             | 0.0070                       | 0.0051                             | 0.0043                              | 0.0259                | 0.0448                                    |
| 75  | JAWA TIMUR      | (85) KOTA MOJOKERTO (71)    | 0.0062               | 0.0015                                    | 0.0077                                       | 0.0147                     | 0.0051                        | 0.0023                   | 0.0074                                    | 0.0054                             | 0.0070                       | 0.0012                             | 0.0030                              | 0.0166                | 0.0464                                    |
| 76  | JAWA TIMUR      | (82) KAB. KEDIRI (67)       | 0.0031               | 0.0030                                    | 0.0061                                       | 0.0147                     | 0.0051                        | 0.0014                   | 0.0065                                    | 0.0095                             | 0.0070                       | 0.0012                             | 0.0030                              | 0.0207                | 0.0480                                    |
| 77  | JAWA TIMUR      | (15) KOTA MALANG (40)       | 0.0031               | 0.0030                                    | 0.0061                                       | 0.0217                     | 0.0083                        | 0.0014                   | 0.0097                                    | 0.0095                             | 0.0070                       | 0.0012                             | 0.0030                              | 0.0207                | 0.0582                                    |
| 78  | JAWA TIMUR      | (56) KAB. PASURUAN (34)     | 0.0062               | 0.0120                                    | 0.0182                                       | 0.0147                     | 0.0083                        | 0.0023                   | 0.0106                                    | 0.0054                             | 0.0070                       | 0.0025                             | 0.0030                              | 0.0179                | 0.0614                                    |
| 79  | JAWA TIMUR      | (17) KAB. SIDOARJO (16)     | 0.0126               | 0.0008                                    | 0.0134                                       | 0.0217                     | 0.0051                        | 0.0023                   | 0.0074                                    | 0.0095                             | 0.0151                       | 0.0025                             | 0.0030                              | 0.0301                | 0.0726                                    |
| 80  | BALI            | (71) KAB. BANGLI (63)       | 0.0062               | 0.0030                                    | 0.0092                                       | 0.0147                     | 0.0051                        | 0.0023                   | 0.0074                                    | 0.0054                             | 0.0070                       | 0.0025                             | 0.0030                              | 0.0179                | 0.0492                                    |
| 81  | BALI            | (62) KAB. BULELENG (59)     | 0.0062               | 0.0030                                    | 0.0092                                       | 0.0147                     | 0.0083                        | 0.0014                   | 0.0097                                    | 0.0054                             | 0.0070                       | 0.0025                             | 0.0015                              | 0.0164                | 0.0500                                    |
| 82  | BALI            | (53) KAB. JEMBRANA (51)     | 0.0062               | 0.0030                                    | 0.0092                                       | 0.0217                     | 0.0051                        | 0.0009                   | 0.0060                                    | 0.0054                             | 0.0070                       | 0.0025                             | 0.0030                              | 0.0179                | 0.0548                                    |

| NO. | PROPINSI           | KABUPATEN/KOTA                      | KELEMBAGAAN          |                                    |                              |                            |                           |                       |                           |                                |                           |                                 |                                  | TOTAL SCORE<br>0.3181 |                           |
|-----|--------------------|-------------------------------------|----------------------|------------------------------------|------------------------------|----------------------------|---------------------------|-----------------------|---------------------------|--------------------------------|---------------------------|---------------------------------|----------------------------------|-----------------------|---------------------------|
|     |                    |                                     | Aparatur & Pelayanan |                                    |                              | Peraturan Daerah<br>0.0771 | Keuangan Daerah           |                       |                           | Kepastian Hukum                |                           |                                 |                                  |                       |                           |
|     |                    |                                     | Birokrasi<br>0.0483  | Penyalah-gunaan wewenang<br>0.0235 | Sub Total Aparat & Pelayanan |                            | Retribusi/Pajak<br>0.0316 | Pemb./ APBD<br>0.0141 | Sub Total Keuangan Daerah | Konsistensi Peraturan<br>0.035 | Penegakan Hukum<br>0.0524 | Pungji Luar Birokrasi<br>0.0194 | Eksekutif - Legislatif<br>0.0167 |                       | Sub Total Kepastian Hukum |
| 83  | BALI               | (52) KAB. TABANAN (47)              | 0.0062               | 0.0030                             | 0.0092                       | 0.0217                     | 0.0051                    | 0.0023                | 0.0074                    | 0.0054                         | 0.0070                    | 0.0025                          | 0.0030                           | 0.0179                | 0.0562                    |
| 84  | BALI               | (26) KOTA DENPASAR (39)             | 0.0126               | 0.0015                             | 0.0141                       | 0.0147                     | 0.0083                    | 0.0023                | 0.0106                    | 0.0054                         | 0.0070                    | 0.0051                          | 0.0015                           | 0.0190                | 0.0584                    |
| 85  | BALI               | (20) KAB. BADUNG (31)               | 0.0126               | 0.0030                             | 0.0156                       | 0.0147                     | 0.0132                    | 0.0059                | 0.0191                    | 0.0024                         | 0.0070                    | 0.0012                          | 0.0030                           | 0.0136                | 0.0630                    |
| 86  | BALI               | (16) KAB. GIANYAR (17)              | 0.0248               | 0.0030                             | 0.0278                       | 0.0147                     | 0.0083                    | 0.0037                | 0.0120                    | 0.0054                         | 0.0070                    | 0.0025                          | 0.0030                           | 0.0179                | 0.0724                    |
| 87  | KALIMANTAN BARAT   | (104) KAB. KAPUAS HULU (104)        | 0.0031               | 0.0015                             | 0.0046                       | 0.0046                     | 0.0020                    | 0.0037                | 0.0057                    | 0.0054                         | 0.0070                    | 0.0051                          | 0.0015                           | 0.0190                | 0.0339                    |
| 88  | KALIMANTAN BARAT   | (86) KAB. PONTIANAK (93)            | 0.0031               | 0.0015                             | 0.0046                       | 0.0046                     | 0.0083                    | 0.0014                | 0.0097                    | 0.0054                         | 0.0070                    | 0.0051                          | 0.0030                           | 0.0205                | 0.0394                    |
| 89  | KALIMANTAN BARAT   | (74) KAB. SANGGAU (84)              | 0.0062               | 0.0030                             | 0.0092                       | 0.0046                     | 0.0051                    | 0.0023                | 0.0074                    | 0.0054                         | 0.0070                    | 0.0051                          | 0.0043                           | 0.0218                | 0.0430                    |
| 90  | KALIMANTAN BARAT   | (110) KAB. KETAPANG (70)            | 0.0062               | 0.0030                             | 0.0092                       | 0.0046                     | 0.0051                    | 0.0059                | 0.0110                    | 0.0054                         | 0.0070                    | 0.0051                          | 0.0043                           | 0.0218                | 0.0466                    |
| 91  | KALIMANTAN BARAT   | (103) KAB. SAMBAS (58)              | 0.0062               | 0.0030                             | 0.0092                       | 0.0147                     | 0.0051                    | 0.0023                | 0.0074                    | 0.0024                         | 0.0070                    | 0.0051                          | 0.0043                           | 0.0188                | 0.0501                    |
| 92  | KALIMANTAN TENGAH  | (95) KAB. KAPUAS (62)               | 0.0062               | 0.0030                             | 0.0092                       | 0.0046                     | 0.0051                    | 0.0023                | 0.0074                    | 0.0095                         | 0.0151                    | 0.0006                          | 0.0030                           | 0.0282                | 0.0494                    |
| 93  | KALIMANTAN TENGAH  | (74) KAB. BARITO SELATAN (41)       | 0.0062               | 0.0015                             | 0.0077                       | 0.0147                     | 0.0051                    | 0.0023                | 0.0074                    | 0.0095                         | 0.0151                    | 0.0006                          | 0.0030                           | 0.0282                | 0.0580                    |
| 94  | KALIMANTAN TENGAH  | (67) KAB. BARITO UTARA (37)         | 0.0062               | 0.0015                             | 0.0077                       | 0.0147                     | 0.0051                    | 0.0059                | 0.0110                    | 0.0054                         | 0.0070                    | 0.0099                          | 0.0030                           | 0.0253                | 0.0587                    |
| 95  | KALIMANTAN SELATAN | (116) KAB. TAPIN (96)               | 0.0031               | 0.0030                             | 0.0061                       | 0.0046                     | 0.0083                    | 0.0014                | 0.0097                    | 0.0054                         | 0.0070                    | 0.0025                          | 0.0030                           | 0.0179                | 0.0383                    |
| 96  | KALIMANTAN SELATAN | (108) KAB. HULU SUNGAI SELATAN (69) | 0.0062               | 0.0030                             | 0.0092                       | 0.0147                     | 0.0020                    | 0.0023                | 0.0043                    | 0.0054                         | 0.0070                    | 0.0025                          | 0.0043                           | 0.0192                | 0.0474                    |
| 97  | KALIMANTAN SELATAN | (81) KAB. HULU SUNGAI UTARA (56)    | 0.0062               | 0.0030                             | 0.0092                       | 0.0147                     | 0.0051                    | 0.0023                | 0.0074                    | 0.0054                         | 0.0070                    | 0.0025                          | 0.0043                           | 0.0192                | 0.0505                    |
| 98  | KALIMANTAN SELATAN | (83) KAB. TANAH LAUT (56)           | 0.0062               | 0.0030                             | 0.0092                       | 0.0147                     | 0.0051                    | 0.0023                | 0.0074                    | 0.0054                         | 0.0070                    | 0.0025                          | 0.0043                           | 0.0192                | 0.0505                    |
| 99  | KALIMANTAN SELATAN | (78) KAB. HULU SUNGAI TENGAH (45)   | 0.0062               | 0.0030                             | 0.0092                       | 0.0217                     | 0.0051                    | 0.0023                | 0.0074                    | 0.0054                         | 0.0070                    | 0.0025                          | 0.0043                           | 0.0192                | 0.0575                    |
| 100 | KALIMANTAN SELATAN | (69) KAB. TABALONG (23)             | 0.0062               | 0.0030                             | 0.0092                       | 0.0147                     | 0.0132                    | 0.0059                | 0.0191                    | 0.0095                         | 0.0070                    | 0.0025                          | 0.0043                           | 0.0233                | 0.0663                    |
| 101 | KALIMANTAN TIMUR   | (39) KOTA SAMARINDA (83)            | 0.0031               | 0.0030                             | 0.0061                       | 0.0147                     | 0.0051                    | 0.0059                | 0.0110                    | 0.0024                         | 0.0034                    | 0.0025                          | 0.0030                           | 0.0113                | 0.0431                    |
| 102 | KALIMANTAN TIMUR   | (22) KAB. KUTAI (32)                | 0.0126               | 0.0030                             | 0.0156                       | 0.0046                     | 0.0083                    | 0.0059                | 0.0142                    | 0.0054                         | 0.0151                    | 0.0025                          | 0.0043                           | 0.0273                | 0.0617                    |
| 103 | KALIMANTAN TIMUR   | (21) KAB. BERAU (30)                | 0.0126               | 0.0030                             | 0.0156                       | 0.0147                     | 0.0083                    | 0.0059                | 0.0142                    | 0.0054                         | 0.0070                    | 0.0025                          | 0.0043                           | 0.0192                | 0.0637                    |
| 104 | KALIMANTAN TIMUR   | (2) KOTA BALIKPAPAN (26)            | 0.0126               | 0.0030                             | 0.0156                       | 0.0046                     | 0.0083                    | 0.0059                | 0.0142                    | 0.0095                         | 0.0151                    | 0.0025                          | 0.0030                           | 0.0301                | 0.0645                    |
| 105 | KALIMANTAN TIMUR   | (64) KAB. PASIR (24)                | 0.0126               | 0.0030                             | 0.0156                       | 0.0217                     | 0.0051                    | 0.0059                | 0.0110                    | 0.0054                         | 0.0070                    | 0.0025                          | 0.0030                           | 0.0179                | 0.0662                    |
| 106 | SULAWESI UTARA     | (76) KAB. SANGIHE TALAUD (102)      | 0.0062               | 0.0030                             | 0.0092                       | 0.0046                     | 0.0020                    | 0.0014                | 0.0034                    | 0.0054                         | 0.0070                    | 0.0025                          | 0.0043                           | 0.0192                | 0.0364                    |
| 107 | SULAWESI UTARA     | (44) KOTA BITUNG (89)               | 0.0062               | 0.0030                             | 0.0092                       | 0.0046                     | 0.0051                    | 0.0023                | 0.0074                    | 0.0054                         | 0.0070                    | 0.0025                          | 0.0043                           | 0.0192                | 0.0404                    |
| 108 | SULAWESI UTARA     | (38) KOTA MANADO (74)               | 0.0031               | 0.0061                             | 0.0092                       | 0.0147                     | 0.0083                    | 0.0014                | 0.0097                    | 0.0024                         | 0.0034                    | 0.0025                          | 0.0030                           | 0.0113                | 0.0449                    |
| 109 | SULAWESI UTARA     | (45) KAB. MINAHASA (61)             | 0.0062               | 0.0030                             | 0.0092                       | 0.0147                     | 0.0051                    | 0.0014                | 0.0065                    | 0.0054                         | 0.0070                    | 0.0025                          | 0.0043                           | 0.0192                | 0.0496                    |
| 110 | GORONTALO          | (101) KAB. GORONTALO (102)          | 0.0062               | 0.0030                             | 0.0092                       | 0.0046                     | 0.0020                    | 0.0014                | 0.0034                    | 0.0054                         | 0.0070                    | 0.0025                          | 0.0043                           | 0.0192                | 0.0364                    |



| NO. | PROPINSI            | KABUPATEN/KOTA                        | KELEMBAGAAN          |                                    |                              |                            |                           |                       |                           |                                |                           |                                 |                                  | TOTAL SCORE<br>0.3181 |                           |
|-----|---------------------|---------------------------------------|----------------------|------------------------------------|------------------------------|----------------------------|---------------------------|-----------------------|---------------------------|--------------------------------|---------------------------|---------------------------------|----------------------------------|-----------------------|---------------------------|
|     |                     |                                       | Aparatur & Pelayanan |                                    |                              | Peraturan Daerah<br>0.0771 | Keuangan Daerah           |                       |                           | Kepastian Hukum                |                           |                                 |                                  |                       |                           |
|     |                     |                                       | Birokrasi<br>0.0483  | Penyalah-gunaan wewenang<br>0.0235 | Sub Total Aparat & Pelayanan |                            | Retribusi/Pajak<br>0.0316 | Pemb./ APBD<br>0.0141 | Sub Total Keuangan Daerah | Konsistensi Peraturan<br>0.035 | Penegakan Hukum<br>0.0524 | Pungji Luar Birokrasi<br>0.0194 | Eksekutif - Legislatif<br>0.0167 |                       | Sub Total Kepastian Hukum |
| 111 | GORONTALO           | (46) KOTA GORONTALO (38)              | 0.0062               | 0.0030                             | 0.0092                       | 0.0217                     | 0.0020                    | 0.0023                | 0.0043                    | 0.0095                         | 0.0070                    | 0.0025                          | 0.0043                           | 0.0233                | 0.0585                    |
| 112 | SULAWESI TENGAH     | (100) KAB. POSO (16)                  | 0.0126               | 0.0030                             | 0.0156                       | 0.0147                     | 0.0031                    | 0.0023                | 0.0054                    | 0.0095                         | 0.0151                    | 0.0051                          | 0.0072                           | 0.0369                | 0.0726                    |
| 113 | SULAWESI TENGAH     | (51) KAB. MOROWALI (12)               | 0.0126               | 0.0030                             | 0.0156                       | 0.0147                     | 0.0031                    | 0.0037                | 0.0068                    | 0.0095                         | 0.0151                    | 0.0099                          | 0.0030                           | 0.0375                | 0.0746                    |
| 114 | SULAWESI TENGAH     | (39) KAB. TOLI TOLI (9)               | 0.0126               | 0.0061                             | 0.0187                       | 0.0046                     | 0.0051                    | 0.0037                | 0.0088                    | 0.0165                         | 0.0151                    | 0.0051                          | 0.0072                           | 0.0439                | 0.0760                    |
| 115 | SULAWESI TENGAH     | (28) KAB. BANGGAI (8)                 | 0.0062               | 0.0061                             | 0.0123                       | 0.0147                     | 0.0051                    | 0.0023                | 0.0074                    | 0.0165                         | 0.0151                    | 0.0051                          | 0.0072                           | 0.0439                | 0.0783                    |
| 116 | SULAWESI TENGAH     | (40) KAB. DONGGALA (4)                | 0.0126               | 0.0061                             | 0.0187                       | 0.0147                     | 0.0083                    | 0.0014                | 0.0097                    | 0.0165                         | 0.0151                    | 0.0051                          | 0.0072                           | 0.0439                | 0.0870                    |
| 117 | SULAWESI TENGGARA   | (48) KAB. KOLAKA (53)                 | 0.0062               | 0.0030                             | 0.0092                       | 0.0046                     | 0.0051                    | 0.0023                | 0.0074                    | 0.0095                         | 0.0151                    | 0.0051                          | 0.0030                           | 0.0327                | 0.0539                    |
| 118 | SULAWESI TENGGARA   | (79) KAB. BUTON (22)                  | 0.0062               | 0.0030                             | 0.0092                       | 0.0217                     | 0.0020                    | 0.0023                | 0.0043                    | 0.0095                         | 0.0151                    | 0.0051                          | 0.0030                           | 0.0327                | 0.0679                    |
| 119 | SULAWESI SELATAN    | (94) KAB. MAJENE (76)                 | 0.0126               | 0.0030                             | 0.0156                       | 0.0046                     | 0.0051                    | 0.0014                | 0.0065                    | 0.0054                         | 0.0070                    | 0.0012                          | 0.0043                           | 0.0179                | 0.0446                    |
| 120 | SULAWESI SELATAN    | (93) KAB. TANA TORAJA (48)            | 0.0126               | 0.0030                             | 0.0156                       | 0.0147                     | 0.0051                    | 0.0023                | 0.0074                    | 0.0054                         | 0.0070                    | 0.0012                          | 0.0043                           | 0.0179                | 0.0556                    |
| 121 | SULAWESI SELATAN    | (63) KAB. PINRANG (42)                | 0.0062               | 0.0008                             | 0.0070                       | 0.0147                     | 0.0051                    | 0.0023                | 0.0074                    | 0.0095                         | 0.0070                    | 0.0051                          | 0.0072                           | 0.0288                | 0.0579                    |
| 122 | SULAWESI SELATAN    | (98) KAB. LUWU (35)                   | 0.0126               | 0.0030                             | 0.0156                       | 0.0217                     | 0.0020                    | 0.0023                | 0.0043                    | 0.0054                         | 0.0070                    | 0.0012                          | 0.0043                           | 0.0179                | 0.0595                    |
| 123 | SULAWESI SELATAN    | (31) KAB. PANGKAJENE & KEPULAUAN (30) | 0.0126               | 0.0030                             | 0.0156                       | 0.0147                     | 0.0132                    | 0.0023                | 0.0155                    | 0.0054                         | 0.0070                    | 0.0012                          | 0.0043                           | 0.0179                | 0.0637                    |
| 124 | SULAWESI SELATAN    | (25) KOTA PARE-PARE (6)               | 0.0248               | 0.0008                             | 0.0256                       | 0.0147                     | 0.0020                    | 0.0023                | 0.0043                    | 0.0165                         | 0.0070                    | 0.0099                          | 0.0043                           | 0.0377                | 0.0823                    |
| 125 | NUSA TENGGARA BARAT | (124.) KAB. LOMBOK BARAT (109)        | 0.0031               | 0.0030                             | 0.0061                       | 0.0046                     | 0.0083                    | 0.0014                | 0.0097                    | 0.0024                         | 0.0034                    | 0.0025                          | 0.0015                           | 0.0098                | 0.0302                    |
| 126 | NUSA TENGGARA BARAT | (126) KAB. BIMA (108)                 | 0.0031               | 0.0015                             | 0.0046                       | 0.0046                     | 0.0083                    | 0.0014                | 0.0097                    | 0.0054                         | 0.0034                    | 0.0012                          | 0.0015                           | 0.0115                | 0.0304                    |
| 127 | NUSA TENGGARA BARAT | (66) KOTA MATARAM (77)                | 0.0126               | 0.0015                             | 0.0141                       | 0.0046                     | 0.0083                    | 0.0023                | 0.0106                    | 0.0054                         | 0.0070                    | 0.0012                          | 0.0015                           | 0.0151                | 0.0444                    |
| 128 | NUSA TENGGARA TIMUR | (120) KAB. FLORES TIMUR (103)         | 0.0031               | 0.0030                             | 0.0061                       | 0.0046                     | 0.0051                    | 0.0037                | 0.0088                    | 0.0054                         | 0.0034                    | 0.0051                          | 0.0015                           | 0.0154                | 0.0349                    |
| 129 | NUSA TENGGARA TIMUR | (117) KAB. ENDE (60)                  | 0.0031               | 0.0030                             | 0.0061                       | 0.0217                     | 0.0051                    | 0.0014                | 0.0065                    | 0.0054                         | 0.0034                    | 0.0051                          | 0.0015                           | 0.0154                | 0.0497                    |
| 130 | NUSA TENGGARA TIMUR | (97) KAB. TIMOR TENGAH SELATAN (44)   | 0.0062               | 0.0015                             | 0.0077                       | 0.0147                     | 0.0031                    | 0.0023                | 0.0054                    | 0.0054                         | 0.0151                    | 0.0051                          | 0.0043                           | 0.0299                | 0.0577                    |
| 131 | NUSA TENGGARA TIMUR | (72) KAB. TIMOR TENGAH UTARA (25)     | 0.0126               | 0.0061                             | 0.0187                       | 0.0147                     | 0.0031                    | 0.0023                | 0.0054                    | 0.0095                         | 0.0070                    | 0.0051                          | 0.0043                           | 0.0259                | 0.0647                    |
| 132 | NUSA TENGGARA TIMUR | (32) KOTA KUPANG (21)                 | 0.0126               | 0.0061                             | 0.0187                       | 0.0147                     | 0.0083                    | 0.0014                | 0.0097                    | 0.0095                         | 0.0070                    | 0.0051                          | 0.0043                           | 0.0259                | 0.0690                    |
| 133 | PAPUA               | (80) KAB. MANOKWARI (49)              | 0.0126               | 0.0030                             | 0.0156                       | 0.0046                     | 0.0051                    | 0.0037                | 0.0088                    | 0.0095                         | 0.0070                    | 0.0025                          | 0.0072                           | 0.0262                | 0.0552                    |
| 134 | PAPUA               | (58) KAB. FAKFAK (46)                 | 0.0126               | 0.0030                             | 0.0156                       | 0.0046                     | 0.0051                    | 0.0059                | 0.0110                    | 0.0095                         | 0.0070                    | 0.0025                          | 0.0072                           | 0.0262                | 0.0574                    |

Lampiran 4.5.2. Hasil Pembobotan Intensitas Indikator-Indikator Faktor Sosial Politik dengan Metode AHP

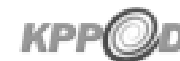

| NO. | PROPINSI         | KABUPATEN/KOTA                      | SOSIAL POLITIK           |                               |                            |                    |                                 |                              |                              |                      |                          |                   |                            |                         |                      | TOTAL SCORE<br>0.2608 |                  |
|-----|------------------|-------------------------------------|--------------------------|-------------------------------|----------------------------|--------------------|---------------------------------|------------------------------|------------------------------|----------------------|--------------------------|-------------------|----------------------------|-------------------------|----------------------|-----------------------|------------------|
|     |                  |                                     | Keamanan                 |                               |                            |                    | Sosial Politik                  |                              |                              |                      |                          | Budaya            |                            |                         |                      |                       |                  |
|     |                  |                                     | Gangguan Usaha<br>0.0523 | Gangguan Masyarakat<br>0.0311 | Kecepatan Aparat<br>0.0724 | Sub Total Keamanan | Partisipasi Masyarakat<br>0.012 | Konflik Masyarakat<br>0.0184 | Stabilitas Politik<br>0.0289 | Unjuk Rasa<br>0.0095 | Sub Total Sosial Politik | Terbuka<br>0.0086 | Non Diskriminasi<br>0.0064 | Adat-istiadat<br>0.0071 | Etos Kerja<br>0.0141 |                       | Sub Total Budaya |
| 1   | SUMATERA UTARA   | (105) KAB. DELI SERDANG (86)        | 0.0034                   | 0.0036                        | 0.0102                     | 0.0172             | 0.0017                          | 0.0024                       | 0.0048                       | 0.0012               | 0.0101                   | 0.0012            | 0.0009                     | 0.0012                  | 0.0019               | 0.0052                | 0.0325           |
| 2   | SUMATERA UTARA   | (109) KAB. LANGKAT (86)             | 0.0034                   | 0.0036                        | 0.0102                     | 0.0172             | 0.0017                          | 0.0024                       | 0.0048                       | 0.0012               | 0.0101                   | 0.0012            | 0.0009                     | 0.0012                  | 0.0019               | 0.0052                | 0.0325           |
| 3   | SUMATERA UTARA   | (13) KOTA SIBOLGA (17)              | 0.0153                   | 0.0080                        | 0.0214                     | 0.0447             | 0.0017                          | 0.0095                       | 0.0048                       | 0.0049               | 0.0209                   | 0.0025            | 0.0009                     | 0.0020                  | 0.0040               | 0.0094                | 0.0750           |
| 4   | SUMATERA UTARA   | (29) KAB. ASAHAN (74)               | 0.0062                   | 0.0036                        | 0.0102                     | 0.0200             | 0.0023                          | 0.0024                       | 0.0020                       | 0.0012               | 0.0079                   | 0.0025            | 0.0009                     | 0.0020                  | 0.0040               | 0.0094                | 0.0373           |
| 5   | SUMATERA UTARA   | (4) KAB. DAIRI (8)                  | 0.0254                   | 0.0163                        | 0.0214                     | 0.0631             | 0.0037                          | 0.0095                       | 0.0048                       | 0.0012               | 0.0192                   | 0.0041            | 0.0031                     | 0.0012                  | 0.0040               | 0.0124                | 0.0947           |
| 6   | SUMATERA UTARA   | (49) KOTA PEMATANG SIANTAR (86)     | 0.0034                   | 0.0036                        | 0.0102                     | 0.0172             | 0.0017                          | 0.0024                       | 0.0048                       | 0.0012               | 0.0101                   | 0.0012            | 0.0009                     | 0.0012                  | 0.0019               | 0.0052                | 0.0325           |
| 7   | SUMATERA UTARA   | (54) KOTA MEDAN (83)                | 0.0062                   | 0.0036                        | 0.0102                     | 0.0200             | 0.0017                          | 0.0024                       | 0.0048                       | 0.0005               | 0.0094                   | 0.0012            | 0.0009                     | 0.0012                  | 0.0019               | 0.0052                | 0.0346           |
| 8   | SUMATERA UTARA   | (61) KOTA TANJUNG BALAI (80)        | 0.0062                   | 0.0036                        | 0.0102                     | 0.0200             | 0.0017                          | 0.0024                       | 0.0048                       | 0.0012               | 0.0101                   | 0.0012            | 0.0009                     | 0.0012                  | 0.0019               | 0.0052                | 0.0353           |
| 9   | SUMATERA UTARA   | (77) KOTA TEBING TINGGI (80)        | 0.0062                   | 0.0036                        | 0.0102                     | 0.0200             | 0.0017                          | 0.0024                       | 0.0048                       | 0.0012               | 0.0101                   | 0.0012            | 0.0009                     | 0.0012                  | 0.0019               | 0.0052                | 0.0353           |
| 10  | SUMATERA UTARA   | (89) KAB. SIMALUNGUN (86)           | 0.0034                   | 0.0036                        | 0.0102                     | 0.0172             | 0.0017                          | 0.0024                       | 0.0048                       | 0.0012               | 0.0101                   | 0.0012            | 0.0009                     | 0.0012                  | 0.0019               | 0.0052                | 0.0325           |
| 11  | SUMATERA UTARA   | (90) KOTA BINJAI (86)               | 0.0034                   | 0.0036                        | 0.0102                     | 0.0172             | 0.0017                          | 0.0024                       | 0.0048                       | 0.0012               | 0.0101                   | 0.0012            | 0.0009                     | 0.0012                  | 0.0019               | 0.0052                | 0.0325           |
| 12  | SUMATERA BARAT   | (123) KAB. PESIRIS SELATAN (75)     | 0.0062                   | 0.0036                        | 0.0102                     | 0.0200             | 0.0017                          | 0.0024                       | 0.0048                       | 0.0025               | 0.0114                   | 0.0025            | 0.0009                     | 0.0012                  | 0.0009               | 0.0055                | 0.0369           |
| 13  | SUMATERA BARAT   | (2) KOTA SAWAH LUNTO (9)            | 0.0153                   | 0.0163                        | 0.0214                     | 0.0530             | 0.0030                          | 0.0095                       | 0.0048                       | 0.0049               | 0.0222                   | 0.0041            | 0.0031                     | 0.0032                  | 0.0040               | 0.0144                | 0.0896           |
| 14  | SUMATERA BARAT   | (34) KOTA PADANG (58)               | 0.0153                   | 0.0080                        | 0.0102                     | 0.0335             | 0.0017                          | 0.0024                       | 0.0020                       | 0.0025               | 0.0086                   | 0.0025            | 0.0009                     | 0.0005                  | 0.0040               | 0.0079                | 0.0500           |
| 15  | SUMATERA BARAT   | (84) KAB. SAWAHLUNTO/SIJUNJUNG (46) | 0.0153                   | 0.0080                        | 0.0102                     | 0.0335             | 0.0017                          | 0.0095                       | 0.0048                       | 0.0025               | 0.0185                   | 0.0025            | 0.0009                     | 0.0012                  | 0.0009               | 0.0055                | 0.0575           |
| 16  | R I A U          | (36) KAB. INDRAGIRI HILIR (45)      | 0.0062                   | 0.0080                        | 0.0214                     | 0.0356             | 0.0023                          | 0.0024                       | 0.0094                       | 0.0025               | 0.0166                   | 0.0012            | 0.0018                     | 0.0020                  | 0.0019               | 0.0069                | 0.0591           |
| 17  | R I A U          | (5) KOTA BATAM (24)                 | 0.0153                   | 0.0080                        | 0.0214                     | 0.0447             | 0.0023                          | 0.0048                       | 0.0048                       | 0.0012               | 0.0131                   | 0.0025            | 0.0018                     | 0.0020                  | 0.0040               | 0.0103                | 0.0681           |
| 18  | R I A U          | (55) KAB. BENGKALIS (62)            | 0.0153                   | 0.0080                        | 0.0048                     | 0.0281             | 0.0023                          | 0.0024                       | 0.0048                       | 0.0025               | 0.0120                   | 0.0025            | 0.0009                     | 0.0012                  | 0.0019               | 0.0065                | 0.0466           |
| 19  | R I A U          | (74) KAB. KAMPAR (45)               | 0.0062                   | 0.0080                        | 0.0214                     | 0.0356             | 0.0023                          | 0.0024                       | 0.0094                       | 0.0025               | 0.0166                   | 0.0012            | 0.0018                     | 0.0020                  | 0.0019               | 0.0069                | 0.0591           |
| 20  | R I A U          | (9) KOTA PEKAN BARU (18)            | 0.0153                   | 0.0080                        | 0.0214                     | 0.0447             | 0.0023                          | 0.0048                       | 0.0094                       | 0.0012               | 0.0177                   | 0.0025            | 0.0018                     | 0.0020                  | 0.0040               | 0.0103                | 0.0727           |
| 21  | J A M B I        | (23) KAB. BATANGHARI (15)           | 0.0153                   | 0.0080                        | 0.0214                     | 0.0447             | 0.0030                          | 0.0095                       | 0.0048                       | 0.0025               | 0.0198                   | 0.0041            | 0.0018                     | 0.0012                  | 0.0040               | 0.0111                | 0.0756           |
| 22  | J A M B I        | (35) KAB. KERINCI (15)              | 0.0153                   | 0.0080                        | 0.0214                     | 0.0447             | 0.0030                          | 0.0095                       | 0.0048                       | 0.0025               | 0.0198                   | 0.0041            | 0.0018                     | 0.0012                  | 0.0040               | 0.0111                | 0.0756           |
| 23  | J A M B I        | (42) KAB. BUNGOTEBO (15)            | 0.0153                   | 0.0080                        | 0.0214                     | 0.0447             | 0.0030                          | 0.0095                       | 0.0048                       | 0.0025               | 0.0198                   | 0.0041            | 0.0018                     | 0.0012                  | 0.0040               | 0.0111                | 0.0756           |
| 24  | SUMATERA SELATAN | (113) KAB. OGAN KOMERING ILIR (84)  | 0.0062                   | 0.0036                        | 0.0102                     | 0.0200             | 0.0017                          | 0.0024                       | 0.0048                       | 0.0012               | 0.0101                   | 0.0012            | 0.0009                     | 0.0012                  | 0.0009               | 0.0042                | 0.0343           |
| 25  | SUMATERA SELATAN | (12) KOTA PALEMBANG (14)            | 0.0153                   | 0.0163                        | 0.0214                     | 0.0530             | 0.0030                          | 0.0048                       | 0.0094                       | 0.0012               | 0.0184                   | 0.0025            | 0.0009                     | 0.0012                  | 0.0009               | 0.0055                | 0.0769           |
| 26  | SUMATERA SELATAN | (68) KAB. MUARA ENIM (66)           | 0.0062                   | 0.0080                        | 0.0102                     | 0.0244             | 0.0017                          | 0.0048                       | 0.0048                       | 0.0012               | 0.0125                   | 0.0025            | 0.0004                     | 0.0012                  | 0.0019               | 0.0060                | 0.0429           |
| 27  | SUMATERA SELATAN | (70) KAB. MUSI BANYUASIN (84)       | 0.0062                   | 0.0036                        | 0.0102                     | 0.0200             | 0.0017                          | 0.0024                       | 0.0048                       | 0.0012               | 0.0101                   | 0.0012            | 0.0009                     | 0.0012                  | 0.0009               | 0.0042                | 0.0343           |

| NO. | PROPINSI         | KABUPATEN/KOTA                   | SOSIAL POLITIK           |                               |                            |                    |                                 |                              |                              |                      |                          |                   |                            |                         |                      | TOTAL SCORE<br>0.2608 |                  |
|-----|------------------|----------------------------------|--------------------------|-------------------------------|----------------------------|--------------------|---------------------------------|------------------------------|------------------------------|----------------------|--------------------------|-------------------|----------------------------|-------------------------|----------------------|-----------------------|------------------|
|     |                  |                                  | Keamanan                 |                               |                            |                    | Sosial Politik                  |                              |                              |                      |                          | Budaya            |                            |                         |                      |                       |                  |
|     |                  |                                  | Gangguan Usaha<br>0.0523 | Gangguan Masyarakat<br>0.0311 | Kecepatan Aparat<br>0.0724 | Sub Total Keamanan | Partisipasi Masyarakat<br>0.012 | Konflik Masyarakat<br>0.0184 | Stabilitas Politik<br>0.0289 | Unjuk Rasa<br>0.0095 | Sub Total Sosial Politik | Terbuka<br>0.0086 | Non Diskriminasi<br>0.0064 | Adat-istiadat<br>0.0071 | Etos Kerja<br>0.0141 |                       | Sub Total Budaya |
| 28  | SUMATERA SELATAN | (88) KAB. MUSI RAWAS (84)        | 0.0062                   | 0.0036                        | 0.0102                     | 0.0200             | 0.0017                          | 0.0024                       | 0.0048                       | 0.0012               | 0.0101                   | 0.0012            | 0.0009                     | 0.0012                  | 0.0009               | 0.0042                | 0.0343           |
| 29  | BANGKA BELITUNG  | (102) KOTA PANGKAL PINANG (71)   | 0.0062                   | 0.0036                        | 0.0102                     | 0.0200             | 0.0023                          | 0.0024                       | 0.0048                       | 0.0012               | 0.0107                   | 0.0025            | 0.0018                     | 0.0020                  | 0.0019               | 0.0082                | 0.0389           |
| 30  | BANGKA BELITUNG  | (59) KAB. BANGKA (71)            | 0.0062                   | 0.0036                        | 0.0102                     | 0.0200             | 0.0023                          | 0.0024                       | 0.0048                       | 0.0012               | 0.0107                   | 0.0025            | 0.0018                     | 0.0020                  | 0.0019               | 0.0082                | 0.0389           |
| 31  | BENGGULU         | (121) KAB. BENGGULU SELATAN (80) | 0.0062                   | 0.0036                        | 0.0102                     | 0.0200             | 0.0017                          | 0.0024                       | 0.0048                       | 0.0012               | 0.0101                   | 0.0012            | 0.0009                     | 0.0012                  | 0.0019               | 0.0052                | 0.0353           |
| 32  | BENGGULU         | (91) KOTA BENGGULU (80)          | 0.0062                   | 0.0036                        | 0.0102                     | 0.0200             | 0.0017                          | 0.0024                       | 0.0048                       | 0.0012               | 0.0101                   | 0.0012            | 0.0009                     | 0.0012                  | 0.0019               | 0.0052                | 0.0353           |
| 33  | LAMPUNG          | (122) KAB. LAMPUNG SELATAN (79)  | 0.0062                   | 0.0021                        | 0.0102                     | 0.0185             | 0.0014                          | 0.0024                       | 0.0048                       | 0.0012               | 0.0098                   | 0.0025            | 0.0018                     | 0.0012                  | 0.0019               | 0.0074                | 0.0357           |
| 34  | LAMPUNG          | (125) KAB. LAMPUNG TIMUR (94)    | 0.0034                   | 0.0021                        | 0.0048                     | 0.0103             | 0.0017                          | 0.0011                       | 0.0020                       | 0.0005               | 0.0053                   | 0.0003            | 0.0004                     | 0.0005                  | 0.0009               | 0.0021                | 0.0177           |
| 35  | LAMPUNG          | (37) KOTA BANDAR LAMPUNG (73)    | 0.0062                   | 0.0036                        | 0.0102                     | 0.0200             | 0.0023                          | 0.0024                       | 0.0048                       | 0.0012               | 0.0107                   | 0.0025            | 0.0018                     | 0.0012                  | 0.0019               | 0.0074                | 0.0381           |
| 36  | LAMPUNG          | (43) KAB. LAMPUNG BARAT (29)     | 0.0153                   | 0.0163                        | 0.0102                     | 0.0418             | 0.0017                          | 0.0024                       | 0.0094                       | 0.0049               | 0.0184                   | 0.0025            | 0.0009                     | 0.0012                  | 0.0019               | 0.0065                | 0.0667           |
| 37  | BANTEN           | (30) KAB. TANGERANG (47)         | 0.0153                   | 0.0080                        | 0.0102                     | 0.0335             | 0.0023                          | 0.0048                       | 0.0048                       | 0.0005               | 0.0124                   | 0.0025            | 0.0018                     | 0.0020                  | 0.0040               | 0.0103                | 0.0562           |
| 38  | BANTEN           | (57) KAB. SERANG (56)            | 0.0062                   | 0.0080                        | 0.0214                     | 0.0356             | 0.0014                          | 0.0048                       | 0.0020                       | 0.0012               | 0.0094                   | 0.0025            | 0.0004                     | 0.0012                  | 0.0019               | 0.0060                | 0.0510           |
| 39  | BANTEN           | (6) TA TANGERANG (22)            | 0.0153                   | 0.0080                        | 0.0214                     | 0.0447             | 0.0023                          | 0.0048                       | 0.0048                       | 0.0012               | 0.0131                   | 0.0041            | 0.0018                     | 0.0020                  | 0.0040               | 0.0119                | 0.0697           |
| 40  | BANTEN           | (75) KAB. LEBAK (31)             | 0.0153                   | 0.0080                        | 0.0214                     | 0.0447             | 0.0017                          | 0.0048                       | 0.0020                       | 0.0005               | 0.0090                   | 0.0041            | 0.0031                     | 0.0012                  | 0.0040               | 0.0124                | 0.0661           |
| 41  | JAWA BARAT       | (106) KAB. CIAMIS (89)           | 0.0062                   | 0.0036                        | 0.0048                     | 0.0146             | 0.0017                          | 0.0011                       | 0.0048                       | 0.0012               | 0.0088                   | 0.0012            | 0.0009                     | 0.0012                  | 0.0019               | 0.0052                | 0.0286           |
| 42  | JAWA BARAT       | (107) KAB. SUKABUMI (65)         | 0.0153                   | 0.0036                        | 0.0102                     | 0.0291             | 0.0017                          | 0.0011                       | 0.0048                       | 0.0012               | 0.0088                   | 0.0012            | 0.0009                     | 0.0012                  | 0.0019               | 0.0052                | 0.0431           |
| 43  | JAWA BARAT       | (111) KAB. KUNINGAN (89)         | 0.0062                   | 0.0036                        | 0.0048                     | 0.0146             | 0.0017                          | 0.0011                       | 0.0048                       | 0.0012               | 0.0088                   | 0.0012            | 0.0009                     | 0.0012                  | 0.0019               | 0.0052                | 0.0286           |
| 44  | JAWA BARAT       | (114) KAB. GARUT (89)            | 0.0062                   | 0.0036                        | 0.0048                     | 0.0146             | 0.0017                          | 0.0011                       | 0.0048                       | 0.0012               | 0.0088                   | 0.0012            | 0.0009                     | 0.0012                  | 0.0019               | 0.0052                | 0.0286           |
| 45  | JAWA BARAT       | (115) KAB. CIREBON (89)          | 0.0062                   | 0.0036                        | 0.0048                     | 0.0146             | 0.0017                          | 0.0011                       | 0.0048                       | 0.0012               | 0.0088                   | 0.0012            | 0.0009                     | 0.0012                  | 0.0019               | 0.0052                | 0.0286           |
| 46  | JAWA BARAT       | (118) KAB. SUMEDANG (90)         | 0.0062                   | 0.0036                        | 0.0048                     | 0.0146             | 0.0017                          | 0.0011                       | 0.0048                       | 0.0012               | 0.0088                   | 0.0012            | 0.0009                     | 0.0005                  | 0.0019               | 0.0045                | 0.0279           |
| 47  | JAWA BARAT       | (119) KAB. TASIKMALAYA (92)      | 0.0034                   | 0.0036                        | 0.0048                     | 0.0118             | 0.0017                          | 0.0011                       | 0.0048                       | 0.0012               | 0.0088                   | 0.0012            | 0.0009                     | 0.0012                  | 0.0019               | 0.0052                | 0.0258           |
| 48  | JAWA BARAT       | (22) KOTA BEKASI (23)            | 0.0153                   | 0.0080                        | 0.0214                     | 0.0447             | 0.0023                          | 0.0048                       | 0.0094                       | 0.0005               | 0.0170                   | 0.0000            | 0.0018                     | 0.0020                  | 0.0040               | 0.0078                | 0.0695           |
| 49  | JAWA BARAT       | (24) KOTA BOGOR (20)             | 0.0153                   | 0.0080                        | 0.0214                     | 0.0447             | 0.0023                          | 0.0048                       | 0.0094                       | 0.0005               | 0.0170                   | 0.0025            | 0.0018                     | 0.0020                  | 0.0040               | 0.0103                | 0.0720           |
| 50  | JAWA BARAT       | (41) KOTA CIREBON (92)           | 0.0034                   | 0.0036                        | 0.0048                     | 0.0118             | 0.0017                          | 0.0011                       | 0.0048                       | 0.0012               | 0.0088                   | 0.0012            | 0.0009                     | 0.0012                  | 0.0019               | 0.0052                | 0.0258           |
| 51  | JAWA BARAT       | (47) KAB. BOGOR (20)             | 0.0153                   | 0.0080                        | 0.0214                     | 0.0447             | 0.0023                          | 0.0048                       | 0.0094                       | 0.0005               | 0.0170                   | 0.0025            | 0.0018                     | 0.0020                  | 0.0040               | 0.0103                | 0.0720           |
| 52  | JAWA BARAT       | (60) KOTA SUKABUMI (52)          | 0.0153                   | 0.0080                        | 0.0102                     | 0.0335             | 0.0017                          | 0.0048                       | 0.0048                       | 0.0025               | 0.0138                   | 0.0025            | 0.0009                     | 0.0012                  | 0.0019               | 0.0065                | 0.0538           |
| 53  | JAWA BARAT       | (65) KAB. KARAWANG (55)          | 0.0062                   | 0.0036                        | 0.0214                     | 0.0312             | 0.0023                          | 0.0024                       | 0.0048                       | 0.0012               | 0.0107                   | 0.0025            | 0.0018                     | 0.0020                  | 0.0040               | 0.0103                | 0.0522           |
| 54  | JAWA BARAT       | (7) KAB. BEKASI (20)             | 0.0153                   | 0.0080                        | 0.0214                     | 0.0447             | 0.0023                          | 0.0048                       | 0.0094                       | 0.0005               | 0.0170                   | 0.0025            | 0.0018                     | 0.0020                  | 0.0040               | 0.0103                | 0.0720           |
| 55  | JAWA BARAT       | (73) KAB. INDRAMAYU (89)         | 0.0062                   | 0.0036                        | 0.0048                     | 0.0146             | 0.0017                          | 0.0011                       | 0.0048                       | 0.0012               | 0.0088                   | 0.0012            | 0.0009                     | 0.0012                  | 0.0019               | 0.0052                | 0.0286           |

| NO. | PROPINSI        | KABUPATEN/KOTA             | SOSIAL POLITIK           |                               |                            |                    |                                 |                              |                              |                      |                          |                   |                            |                         |                      | TOTAL SCORE<br>0.2608 |                  |
|-----|-----------------|----------------------------|--------------------------|-------------------------------|----------------------------|--------------------|---------------------------------|------------------------------|------------------------------|----------------------|--------------------------|-------------------|----------------------------|-------------------------|----------------------|-----------------------|------------------|
|     |                 |                            | Keamanan                 |                               |                            |                    | Sosial Politik                  |                              |                              |                      |                          | Budaya            |                            |                         |                      |                       |                  |
|     |                 |                            | Gangguan Usaha<br>0.0523 | Gangguan Masyarakat<br>0.0311 | Kecepatan Aparat<br>0.0724 | Sub Total Keamanan | Partisipasi Masyarakat<br>0.012 | Konflik Masyarakat<br>0.0184 | Stabilitas Politik<br>0.0289 | Unjuk Rasa<br>0.0095 | Sub Total Sosial Politik | Terbuka<br>0.0086 | Non Diskriminasi<br>0.0064 | Adat-istiadat<br>0.0071 | Etos Kerja<br>0.0141 |                       | Sub Total Budaya |
| 56  | JAWA TENGAH     | (1) KOTA SEMARANG (3)      | 0.0254                   | 0.0163                        | 0.0214                     | 0.0631             | 0.0030                          | 0.0095                       | 0.0094                       | 0.0012               | 0.0231                   | 0.0041            | 0.0031                     | 0.0032                  | 0.0067               | 0.0171                | 0.1033           |
| 57  | JAWA TENGAH     | (10) KAB. KENDAL (12)      | 0.0062                   | 0.0163                        | 0.0214                     | 0.0439             | 0.0023                          | 0.0095                       | 0.0094                       | 0.0049               | 0.0261                   | 0.0041            | 0.0018                     | 0.0032                  | 0.0067               | 0.0158                | 0.0858           |
| 58  | JAWA TENGAH     | (11) KAB. PEMALANG (6)     | 0.0254                   | 0.0163                        | 0.0214                     | 0.0631             | 0.0030                          | 0.0095                       | 0.0094                       | 0.0025               | 0.0244                   | 0.0041            | 0.0018                     | 0.0020                  | 0.0019               | 0.0098                | 0.0973           |
| 59  | JAWA TENGAH     | (14) KOTA PEKALONGAN (7)   | 0.0254                   | 0.0163                        | 0.0214                     | 0.0631             | 0.0023                          | 0.0095                       | 0.0012                       | 0.0049               | 0.0179                   | 0.0041            | 0.0031                     | 0.0020                  | 0.0067               | 0.0159                | 0.0969           |
| 60  | JAWA TENGAH     | (19) KAB. PEKALONGAN (1)   | 0.0254                   | 0.0163                        | 0.0214                     | 0.0631             | 0.0023                          | 0.0095                       | 0.0094                       | 0.0049               | 0.0261                   | 0.0041            | 0.0031                     | 0.0020                  | 0.0067               | 0.0159                | 0.1051           |
| 61  | JAWA TENGAH     | (27) KAB. MAGELANG (2)     | 0.0254                   | 0.0163                        | 0.0214                     | 0.0631             | 0.0023                          | 0.0095                       | 0.0094                       | 0.0049               | 0.0261                   | 0.0041            | 0.0031                     | 0.0032                  | 0.0040               | 0.0144                | 0.1036           |
| 62  | JAWA TENGAH     | (28) KAB. TEGAL (5)        | 0.0254                   | 0.0163                        | 0.0214                     | 0.0631             | 0.0023                          | 0.0048                       | 0.0094                       | 0.0049               | 0.0214                   | 0.0041            | 0.0031                     | 0.0020                  | 0.0067               | 0.0159                | 0.1004           |
| 63  | JAWA TENGAH     | (3) KOTA TEGAL (4)         | 0.0254                   | 0.0163                        | 0.0214                     | 0.0631             | 0.0030                          | 0.0048                       | 0.0094                       | 0.0049               | 0.0221                   | 0.0041            | 0.0031                     | 0.0032                  | 0.0067               | 0.0171                | 0.1023           |
| 64  | JAWA TENGAH     | (50) KAB. SUKOHARJO (13)   | 0.0153                   | 0.0080                        | 0.0214                     | 0.0447             | 0.0023                          | 0.0048                       | 0.0094                       | 0.0025               | 0.0190                   | 0.0041            | 0.0018                     | 0.0032                  | 0.0067               | 0.0158                | 0.0795           |
| 65  | D.I. YOGYAKARTA | (33) KOTA YOGYAKARTA (44)  | 0.0153                   | 0.0080                        | 0.0102                     | 0.0335             | 0.0030                          | 0.0048                       | 0.0048                       | 0.0012               | 0.0138                   | 0.0041            | 0.0018                     | 0.0020                  | 0.0040               | 0.0119                | 0.0592           |
| 66  | JAWA TIMUR      | (112) KAB. BANGKALAN (79)  | 0.0062                   | 0.0036                        | 0.0102                     | 0.0200             | 0.0017                          | 0.0024                       | 0.0020                       | 0.0049               | 0.0110                   | 0.0012            | 0.0004                     | 0.0012                  | 0.0019               | 0.0047                | 0.0357           |
| 67  | JAWA TIMUR      | (120) KAB. PAMEKASAN (79)  | 0.0062                   | 0.0036                        | 0.0102                     | 0.0200             | 0.0017                          | 0.0024                       | 0.0020                       | 0.0049               | 0.0110                   | 0.0012            | 0.0004                     | 0.0012                  | 0.0019               | 0.0047                | 0.0357           |
| 68  | JAWA TIMUR      | (15) KOTA MALANG (42)      | 0.0153                   | 0.0080                        | 0.0102                     | 0.0335             | 0.0023                          | 0.0048                       | 0.0094                       | 0.0025               | 0.0190                   | 0.0025            | 0.0009                     | 0.0020                  | 0.0019               | 0.0073                | 0.0598           |
| 69  | JAWA TIMUR      | (17) KAB. SIDOARJO (57)    | 0.0062                   | 0.0080                        | 0.0102                     | 0.0244             | 0.0030                          | 0.0095                       | 0.0048                       | 0.0025               | 0.0198                   | 0.0025            | 0.0004                     | 0.0012                  | 0.0019               | 0.0060                | 0.0502           |
| 70  | JAWA TIMUR      | (18) KOTA SURABAYA (40)    | 0.0153                   | 0.0163                        | 0.0102                     | 0.0418             | 0.0030                          | 0.0048                       | 0.0020                       | 0.0005               | 0.0103                   | 0.0006            | 0.0009                     | 0.0032                  | 0.0040               | 0.0087                | 0.0608           |
| 71  | JAWA TIMUR      | (56) KAB. PASURUAN (32)    | 0.0153                   | 0.0163                        | 0.0102                     | 0.0418             | 0.0030                          | 0.0095                       | 0.0048                       | 0.0012               | 0.0185                   | 0.0012            | 0.0002                     | 0.0020                  | 0.0009               | 0.0043                | 0.0646           |
| 72  | JAWA TIMUR      | (72) KAB. MOJOKERTO (33)   | 0.0153                   | 0.0080                        | 0.0214                     | 0.0447             | 0.0017                          | 0.0024                       | 0.0048                       | 0.0025               | 0.0114                   | 0.0025            | 0.0018                     | 0.0012                  | 0.0019               | 0.0074                | 0.0635           |
| 73  | JAWA TIMUR      | (8) KOTA KEDIRI (25)       | 0.0153                   | 0.0163                        | 0.0102                     | 0.0418             | 0.0030                          | 0.0095                       | 0.0020                       | 0.0049               | 0.0194                   | 0.0025            | 0.0004                     | 0.0020                  | 0.0019               | 0.0068                | 0.0680           |
| 74  | JAWA TIMUR      | (82) KAB. KEDIRI (49)      | 0.0153                   | 0.0036                        | 0.0102                     | 0.0291             | 0.0030                          | 0.0048                       | 0.0094                       | 0.0025               | 0.0197                   | 0.0025            | 0.0009                     | 0.0012                  | 0.0019               | 0.0065                | 0.0553           |
| 75  | JAWA TIMUR      | (85) KOTA MOJOKERTO (77)   | 0.0062                   | 0.0036                        | 0.0102                     | 0.0200             | 0.0023                          | 0.0024                       | 0.0048                       | 0.0025               | 0.0120                   | 0.0012            | 0.0009                     | 0.0005                  | 0.0019               | 0.0045                | 0.0365           |
| 76  | JAWA TIMUR      | (87) KAB. BLITAR (28)      | 0.0153                   | 0.0080                        | 0.0102                     | 0.0335             | 0.0023                          | 0.0095                       | 0.0094                       | 0.0049               | 0.0261                   | 0.0025            | 0.0018                     | 0.0012                  | 0.0019               | 0.0074                | 0.0670           |
| 77  | JAWA TIMUR      | (92) KOTA PROBOLINGGO (77) | 0.0062                   | 0.0036                        | 0.0102                     | 0.0200             | 0.0023                          | 0.0024                       | 0.0048                       | 0.0025               | 0.0120                   | 0.0012            | 0.0009                     | 0.0005                  | 0.0019               | 0.0045                | 0.0365           |
| 78  | JAWA TIMUR      | (96) KAB. MAGETAN (35)     | 0.0153                   | 0.0080                        | 0.0102                     | 0.0335             | 0.0023                          | 0.0048                       | 0.0094                       | 0.0049               | 0.0214                   | 0.0025            | 0.0018                     | 0.0012                  | 0.0019               | 0.0074                | 0.0623           |
| 79  | JAWA TIMUR      | (99) KAB. BANYUWANGI (71)  | 0.0062                   | 0.0036                        | 0.0102                     | 0.0200             | 0.0023                          | 0.0024                       | 0.0048                       | 0.0049               | 0.0144                   | 0.0012            | 0.0009                     | 0.0005                  | 0.0019               | 0.0045                | 0.0389           |
| 80  | BALI            | (16) KAB. GIANYAR (10)     | 0.0254                   | 0.0163                        | 0.0214                     | 0.0631             | 0.0023                          | 0.0048                       | 0.0094                       | 0.0012               | 0.0177                   | 0.0012            | 0.0009                     | 0.0012                  | 0.0040               | 0.0073                | 0.0881           |
| 81  | BALI            | (20) KAB. BADUNG (16)      | 0.0254                   | 0.0080                        | 0.0214                     | 0.0548             | 0.0023                          | 0.0024                       | 0.0094                       | 0.0012               | 0.0153                   | 0.0012            | 0.0009                     | 0.0012                  | 0.0019               | 0.0052                | 0.0753           |
| 82  | BALI            | (26) KOTA DENPASAR (29)    | 0.0153                   | 0.0080                        | 0.0214                     | 0.0447             | 0.0017                          | 0.0048                       | 0.0048                       | 0.0025               | 0.0138                   | 0.0025            | 0.0018                     | 0.0020                  | 0.0019               | 0.0082                | 0.0667           |
| 83  | BALI            | (52) KAB. TABANAN (26)     | 0.0153                   | 0.0080                        | 0.0214                     | 0.0447             | 0.0023                          | 0.0095                       | 0.0048                       | 0.0012               | 0.0178                   | 0.0012            | 0.0009                     | 0.0012                  | 0.0019               | 0.0052                | 0.0677           |



| NO. | PROPINSI           | KABUPATEN/KOTA                      | SOSIAL POLITIK           |                               |                            |                    |                                 |                              |                              |                      |                          |                   |                            |                         |                      | TOTAL SCORE<br>0.2608 |                  |
|-----|--------------------|-------------------------------------|--------------------------|-------------------------------|----------------------------|--------------------|---------------------------------|------------------------------|------------------------------|----------------------|--------------------------|-------------------|----------------------------|-------------------------|----------------------|-----------------------|------------------|
|     |                    |                                     | Keamanan                 |                               |                            |                    | Sosial Politik                  |                              |                              |                      |                          | Budaya            |                            |                         |                      |                       |                  |
|     |                    |                                     | Gangguan Usaha<br>0.0523 | Gangguan Masyarakat<br>0.0311 | Kecepatan Aparat<br>0.0724 | Sub Total Keamanan | Partisipasi Masyarakat<br>0.012 | Konflik Masyarakat<br>0.0184 | Stabilitas Politik<br>0.0289 | Unjuk Rasa<br>0.0095 | Sub Total Sosial Politik | Terbuka<br>0.0086 | Non Diskriminasi<br>0.0064 | Adat-istiadat<br>0.0071 | Etos Kerja<br>0.0141 |                       | Sub Total Budaya |
| 84  | BALI               | (53) KAB. JEMBRANA (43)             | 0.0153                   | 0.0080                        | 0.0214                     | 0.0447             | 0.0023                          | 0.0024                       | 0.0048                       | 0.0012               | 0.0107                   | 0.0012            | 0.0009                     | 0.0012                  | 0.0009               | 0.0042                | 0.0596           |
| 85  | BALI               | (62) KAB. BULELENG (38)             | 0.0153                   | 0.0080                        | 0.0214                     | 0.0447             | 0.0023                          | 0.0048                       | 0.0048                       | 0.0005               | 0.0124                   | 0.0012            | 0.0009                     | 0.0012                  | 0.0009               | 0.0042                | 0.0613           |
| 86  | BALI               | (71) KAB. BANGLI (34)               | 0.0153                   | 0.0080                        | 0.0214                     | 0.0447             | 0.0023                          | 0.0048                       | 0.0048                       | 0.0012               | 0.0131                   | 0.0012            | 0.0009                     | 0.0012                  | 0.0019               | 0.0052                | 0.0630           |
| 87  | KALIMANTAN BARAT   | (103) KAB. SAMBAS (85)              | 0.0034                   | 0.0012                        | 0.0048                     | 0.0094             | 0.0017                          | 0.0007                       | 0.0120                       | 0.0025               | 0.0169                   | 0.0025            | 0.0018                     | 0.0020                  | 0.0009               | 0.0072                | 0.0335           |
| 88  | KALIMANTAN BARAT   | (104) KAB. KAPUAS HULU (64)         | 0.0062                   | 0.0080                        | 0.0102                     | 0.0244             | 0.0017                          | 0.0011                       | 0.0094                       | 0.0049               | 0.0171                   | 0.0012            | 0.0004                     | 0.0005                  | 0.0009               | 0.0030                | 0.0445           |
| 89  | KALIMANTAN BARAT   | (110) KAB. KETAPANG (88)            | 0.0034                   | 0.0036                        | 0.0102                     | 0.0172             | 0.0017                          | 0.0011                       | 0.0020                       | 0.0025               | 0.0073                   | 0.0025            | 0.0018                     | 0.0020                  | 0.0009               | 0.0072                | 0.0317           |
| 90  | KALIMANTAN BARAT   | (74) KAB. SANGGAU (72)              | 0.0062                   | 0.0036                        | 0.0048                     | 0.0146             | 0.0017                          | 0.0007                       | 0.0120                       | 0.0025               | 0.0169                   | 0.0025            | 0.0018                     | 0.0020                  | 0.0009               | 0.0072                | 0.0387           |
| 91  | KALIMANTAN BARAT   | (86) KAB. PONTIANAK (82)            | 0.0062                   | 0.0036                        | 0.0102                     | 0.0200             | 0.0017                          | 0.0011                       | 0.0020                       | 0.0025               | 0.0073                   | 0.0025            | 0.0018                     | 0.0012                  | 0.0019               | 0.0074                | 0.0347           |
| 92  | KALIMANTAN TENGAH  | (67) KAB. BARITO UTARA (71)         | 0.0062                   | 0.0080                        | 0.0102                     | 0.0244             | 0.0017                          | 0.0048                       | 0.0020                       | 0.0025               | 0.0110                   | 0.0012            | 0.0009                     | 0.0005                  | 0.0009               | 0.0035                | 0.0389           |
| 93  | KALIMANTAN TENGAH  | (74) KAB. BARITO SELATAN (69)       | 0.0062                   | 0.0036                        | 0.0102                     | 0.0200             | 0.0017                          | 0.0011                       | 0.0094                       | 0.0012               | 0.0134                   | 0.0012            | 0.0009                     | 0.0020                  | 0.0040               | 0.0081                | 0.0415           |
| 94  | KALIMANTAN TENGAH  | (95) KAB. KAPUAS (76)               | 0.0062                   | 0.0036                        | 0.0102                     | 0.0200             | 0.0023                          | 0.0011                       | 0.0048                       | 0.0012               | 0.0094                   | 0.0012            | 0.0009                     | 0.0012                  | 0.0040               | 0.0073                | 0.0367           |
| 95  | KALIMANTAN SELATAN | (108) KAB. HULU SUNGAI SELATAN (71) | 0.0062                   | 0.0036                        | 0.0102                     | 0.0200             | 0.0023                          | 0.0024                       | 0.0048                       | 0.0012               | 0.0107                   | 0.0025            | 0.0018                     | 0.0020                  | 0.0019               | 0.0082                | 0.0389           |
| 96  | KALIMANTAN SELATAN | (116) KAB. TAPIN (80)               | 0.0062                   | 0.0036                        | 0.0102                     | 0.0200             | 0.0017                          | 0.0024                       | 0.0048                       | 0.0012               | 0.0101                   | 0.0012            | 0.0009                     | 0.0012                  | 0.0019               | 0.0052                | 0.0353           |
| 97  | KALIMANTAN SELATAN | (69) KAB. TABALONG (71)             | 0.0062                   | 0.0036                        | 0.0102                     | 0.0200             | 0.0023                          | 0.0024                       | 0.0048                       | 0.0012               | 0.0107                   | 0.0025            | 0.0018                     | 0.0020                  | 0.0019               | 0.0082                | 0.0389           |
| 98  | KALIMANTAN SELATAN | (78) KAB. HULU SUNGAI TENGAH (71)   | 0.0062                   | 0.0036                        | 0.0102                     | 0.0200             | 0.0023                          | 0.0024                       | 0.0048                       | 0.0012               | 0.0107                   | 0.0025            | 0.0018                     | 0.0020                  | 0.0019               | 0.0082                | 0.0389           |
| 99  | KALIMANTAN SELATAN | (81) KAB. HULU SUNGAI UTARA (71)    | 0.0062                   | 0.0036                        | 0.0102                     | 0.0200             | 0.0023                          | 0.0024                       | 0.0048                       | 0.0012               | 0.0107                   | 0.0025            | 0.0018                     | 0.0020                  | 0.0019               | 0.0082                | 0.0389           |
| 100 | KALIMANTAN SELATAN | (83) KAB. TANAH LAUT (70)           | 0.0062                   | 0.0036                        | 0.0102                     | 0.0200             | 0.0017                          | 0.0024                       | 0.0048                       | 0.0025               | 0.0114                   | 0.0025            | 0.0018                     | 0.0020                  | 0.0019               | 0.0082                | 0.0396           |
| 101 | KALIMANTAN TIMUR   | (2) KOTA BALIKPAPAN (21)            | 0.0153                   | 0.0036                        | 0.0214                     | 0.0403             | 0.0023                          | 0.0048                       | 0.0094                       | 0.0025               | 0.0190                   | 0.0025            | 0.0031                     | 0.0020                  | 0.0040               | 0.0116                | 0.0709           |
| 102 | KALIMANTAN TIMUR   | (21) KAB. BERAU (61)                | 0.0062                   | 0.0080                        | 0.0102                     | 0.0244             | 0.0030                          | 0.0024                       | 0.0094                       | 0.0012               | 0.0160                   | 0.0025            | 0.0018                     | 0.0012                  | 0.0019               | 0.0074                | 0.0478           |
| 103 | KALIMANTAN TIMUR   | (22) KAB. KUTAI (11)                | 0.0153                   | 0.0163                        | 0.0214                     | 0.0530             | 0.0023                          | 0.0095                       | 0.0094                       | 0.0049               | 0.0261                   | 0.0025            | 0.0018                     | 0.0020                  | 0.0019               | 0.0082                | 0.0873           |
| 104 | KALIMANTAN TIMUR   | (39) KOTA SAMARINDA (67)            | 0.0062                   | 0.0036                        | 0.0102                     | 0.0200             | 0.0023                          | 0.0048                       | 0.0048                       | 0.0012               | 0.0131                   | 0.0025            | 0.0009                     | 0.0020                  | 0.0040               | 0.0094                | 0.0425           |
| 105 | KALIMANTAN TIMUR   | (64) KAB. PASIR (78)                | 0.0062                   | 0.0036                        | 0.0102                     | 0.0200             | 0.0023                          | 0.0024                       | 0.0048                       | 0.0012               | 0.0107                   | 0.0012            | 0.0009                     | 0.0012                  | 0.0019               | 0.0052                | 0.0359           |
| 106 | SULAWESI UTARA     | (38) KOTA MANADO (51)               | 0.0153                   | 0.0080                        | 0.0048                     | 0.0281             | 0.0017                          | 0.0048                       | 0.0094                       | 0.0025               | 0.0184                   | 0.0025            | 0.0018                     | 0.0012                  | 0.0019               | 0.0074                | 0.0539           |
| 107 | SULAWESI UTARA     | (44) KOTA BITUNG (41)               | 0.0153                   | 0.0080                        | 0.0102                     | 0.0335             | 0.0023                          | 0.0048                       | 0.0094                       | 0.0025               | 0.0190                   | 0.0025            | 0.0018                     | 0.0020                  | 0.0019               | 0.0082                | 0.0607           |
| 108 | SULAWESI UTARA     | (45) KAB. MINAHASA (41)             | 0.0153                   | 0.0080                        | 0.0102                     | 0.0335             | 0.0023                          | 0.0048                       | 0.0094                       | 0.0025               | 0.0190                   | 0.0025            | 0.0018                     | 0.0020                  | 0.0019               | 0.0082                | 0.0607           |
| 109 | SULAWESI UTARA     | (76) KAB. SANGIHE TALAUD (41)       | 0.0153                   | 0.0080                        | 0.0102                     | 0.0335             | 0.0023                          | 0.0048                       | 0.0094                       | 0.0025               | 0.0190                   | 0.0025            | 0.0018                     | 0.0020                  | 0.0019               | 0.0082                | 0.0607           |
| 110 | GORONTALO          | (101) KAB. GORONTALO (41)           | 0.0153                   | 0.0080                        | 0.0102                     | 0.0335             | 0.0023                          | 0.0048                       | 0.0094                       | 0.0025               | 0.0190                   | 0.0025            | 0.0018                     | 0.0020                  | 0.0019               | 0.0082                | 0.0607           |
| 111 | GORONTALO          | (46) KOTA GORONTALO (37)            | 0.0153                   | 0.0080                        | 0.0102                     | 0.0335             | 0.0030                          | 0.0048                       | 0.0094                       | 0.0025               | 0.0197                   | 0.0025            | 0.0018                     | 0.0020                  | 0.0019               | 0.0082                | 0.0614           |

| NO. | PROPINSI            | KABUPATEN/KOTA                        | SOSIAL POLITIK           |                               |                            |                    |                                 |                              |                              |                      |                          |                   |                            |                         |                      | TOTAL SCORE<br>0.2608 |                  |
|-----|---------------------|---------------------------------------|--------------------------|-------------------------------|----------------------------|--------------------|---------------------------------|------------------------------|------------------------------|----------------------|--------------------------|-------------------|----------------------------|-------------------------|----------------------|-----------------------|------------------|
|     |                     |                                       | Keamanan                 |                               |                            |                    | Sosial Politik                  |                              |                              |                      |                          | Budaya            |                            |                         |                      |                       |                  |
|     |                     |                                       | Gangguan Usaha<br>0.0523 | Gangguan Masyarakat<br>0.0311 | Kecepatan Aparat<br>0.0724 | Sub Total Keamanan | Partisipasi Masyarakat<br>0.012 | Konflik Masyarakat<br>0.0184 | Stabilitas Politik<br>0.0289 | Unjuk Rasa<br>0.0095 | Sub Total Sosial Politik | Terbuka<br>0.0086 | Non Diskriminasi<br>0.0064 | Adat-istiadat<br>0.0071 | Etos Kerja<br>0.0141 |                       | Sub Total Budaya |
| 112 | SULAWESI TENGAH     | (100) KAB. POSO (93)                  | 0.0034                   | 0.0021                        | 0.0048                     | 0.0103             | 0.0030                          | 0.0007                       | 0.0010                       | 0.0025               | 0.0072                   | 0.0012            | 0.0009                     | 0.0012                  | 0.0019               | 0.0052                | 0.0227           |
| 113 | SULAWESI TENGAH     | (28) KAB. BANGGAI (27)                | 0.0153                   | 0.0080                        | 0.0102                     | 0.0335             | 0.0037                          | 0.0024                       | 0.0094                       | 0.0025               | 0.0180                   | 0.0041            | 0.0031                     | 0.0020                  | 0.0067               | 0.0159                | 0.0674           |
| 114 | SULAWESI TENGAH     | (39) KAB. TOLI TOLI (27)              | 0.0153                   | 0.0080                        | 0.0102                     | 0.0335             | 0.0037                          | 0.0024                       | 0.0094                       | 0.0025               | 0.0180                   | 0.0041            | 0.0031                     | 0.0020                  | 0.0067               | 0.0159                | 0.0674           |
| 115 | SULAWESI TENGAH     | (40) KAB. DONGGALA (27)               | 0.0153                   | 0.0080                        | 0.0102                     | 0.0335             | 0.0037                          | 0.0024                       | 0.0094                       | 0.0025               | 0.0180                   | 0.0041            | 0.0031                     | 0.0020                  | 0.0067               | 0.0159                | 0.0674           |
| 116 | SULAWESI TENGAH     | (51) KAB. MOROWALI (30)               | 0.0153                   | 0.0080                        | 0.0102                     | 0.0335             | 0.0030                          | 0.0024                       | 0.0094                       | 0.0049               | 0.0197                   | 0.0041            | 0.0031                     | 0.0020                  | 0.0040               | 0.0132                | 0.0664           |
| 117 | SULAWESI TENGGARA   | (48) KAB. KOLAKA (53)                 | 0.0153                   | 0.0080                        | 0.0102                     | 0.0335             | 0.0023                          | 0.0048                       | 0.0048                       | 0.0025               | 0.0144                   | 0.0012            | 0.0009                     | 0.0012                  | 0.0019               | 0.0052                | 0.0531           |
| 118 | SULAWESI TENGGARA   | (79) KAB. BUTON (53)                  | 0.0153                   | 0.0080                        | 0.0102                     | 0.0335             | 0.0023                          | 0.0048                       | 0.0048                       | 0.0025               | 0.0144                   | 0.0012            | 0.0009                     | 0.0012                  | 0.0019               | 0.0052                | 0.0531           |
| 119 | SULAWESI SELATAN    | (25) KOTA PARE-PARE (36)              | 0.0153                   | 0.0080                        | 0.0102                     | 0.0335             | 0.0023                          | 0.0095                       | 0.0048                       | 0.0049               | 0.0215                   | 0.0025            | 0.0009                     | 0.0012                  | 0.0019               | 0.0065                | 0.0615           |
| 120 | SULAWESI SELATAN    | (31) KAB. PANGKAJENE & KEPULAUAN (48) | 0.0153                   | 0.0080                        | 0.0102                     | 0.0335             | 0.0023                          | 0.0024                       | 0.0094                       | 0.0012               | 0.0153                   | 0.0012            | 0.0018                     | 0.0020                  | 0.0019               | 0.0069                | 0.0557           |
| 121 | SULAWESI SELATAN    | (63) KAB. PINRANG (39)                | 0.0153                   | 0.0080                        | 0.0102                     | 0.0335             | 0.0017                          | 0.0095                       | 0.0020                       | 0.0049               | 0.0181                   | 0.0025            | 0.0009                     | 0.0020                  | 0.0040               | 0.0094                | 0.0610           |
| 122 | SULAWESI SELATAN    | (93) KAB. TANA TORAJA (60)            | 0.0153                   | 0.0080                        | 0.0102                     | 0.0335             | 0.0023                          | 0.0024                       | 0.0048                       | 0.0012               | 0.0107                   | 0.0012            | 0.0009                     | 0.0012                  | 0.0019               | 0.0052                | 0.0494           |
| 123 | SULAWESI SELATAN    | (94) KAB. MAJENE (48)                 | 0.0153                   | 0.0080                        | 0.0102                     | 0.0335             | 0.0023                          | 0.0024                       | 0.0094                       | 0.0012               | 0.0153                   | 0.0012            | 0.0018                     | 0.0020                  | 0.0019               | 0.0069                | 0.0557           |
| 124 | SULAWESI SELATAN    | (98) KAB. LUWU (63)                   | 0.0153                   | 0.0036                        | 0.0102                     | 0.0291             | 0.0023                          | 0.0024                       | 0.0048                       | 0.0012               | 0.0107                   | 0.0012            | 0.0009                     | 0.0012                  | 0.0019               | 0.0052                | 0.0450           |
| 125 | NUSA TENGGARA BARAT | (124) KAB. LOMBOK BARAT (87)          | 0.0062                   | 0.0021                        | 0.0048                     | 0.0131             | 0.0017                          | 0.0011                       | 0.0048                       | 0.0005               | 0.0081                   | 0.0025            | 0.0031                     | 0.0012                  | 0.0040               | 0.0108                | 0.0320           |
| 126 | NUSA TENGGARA BARAT | (126) KAB. BIMA (91)                  | 0.0062                   | 0.0021                        | 0.0048                     | 0.0131             | 0.0017                          | 0.0011                       | 0.0020                       | 0.0012               | 0.0060                   | 0.0012            | 0.0018                     | 0.0020                  | 0.0019               | 0.0069                | 0.0260           |
| 127 | NUSA TENGGARA BARAT | (66) KOTA MATARAM (50)                | 0.0153                   | 0.0036                        | 0.0214                     | 0.0403             | 0.0017                          | 0.0024                       | 0.0020                       | 0.0012               | 0.0073                   | 0.0012            | 0.0018                     | 0.0020                  | 0.0019               | 0.0069                | 0.0545           |
| 128 | NUSA TENGGARA TIMUR | (117) KAB. ENDE (81)                  | 0.0153                   | 0.0036                        | 0.0048                     | 0.0237             | 0.0017                          | 0.0011                       | 0.0020                       | 0.0012               | 0.0060                   | 0.0012            | 0.0002                     | 0.0020                  | 0.0019               | 0.0053                | 0.0350           |
| 129 | NUSA TENGGARA TIMUR | (120) KAB. FLORES TIMUR (65)          | 0.0153                   | 0.0080                        | 0.0048                     | 0.0281             | 0.0017                          | 0.0048                       | 0.0020                       | 0.0012               | 0.0097                   | 0.0012            | 0.0002                     | 0.0020                  | 0.0019               | 0.0053                | 0.0431           |
| 130 | NUSA TENGGARA TIMUR | (32) KOTA KUPANG (19)                 | 0.0153                   | 0.0080                        | 0.0214                     | 0.0447             | 0.0023                          | 0.0048                       | 0.0094                       | 0.0049               | 0.0214                   | 0.0025            | 0.0009                     | 0.0012                  | 0.0019               | 0.0065                | 0.0726           |
| 131 | NUSA TENGGARA TIMUR | (72) KAB. TIMOR TENGAH UTARA (19)     | 0.0153                   | 0.0080                        | 0.0214                     | 0.0447             | 0.0023                          | 0.0048                       | 0.0094                       | 0.0049               | 0.0214                   | 0.0025            | 0.0009                     | 0.0012                  | 0.0019               | 0.0065                | 0.0726           |
| 132 | NUSA TENGGARA TIMUR | (97) KAB. TIMOR TENGAH SELATAN (54)   | 0.0062                   | 0.0080                        | 0.0214                     | 0.0356             | 0.0014                          | 0.0024                       | 0.0048                       | 0.0049               | 0.0135                   | 0.0025            | 0.0004                     | 0.0003                  | 0.0005               | 0.0037                | 0.0528           |
| 133 | PAPUA               | (58) KAB. FAKFAK (68)                 | 0.0062                   | 0.0080                        | 0.0102                     | 0.0244             | 0.0017                          | 0.0024                       | 0.0048                       | 0.0025               | 0.0114                   | 0.0025            | 0.0009                     | 0.0005                  | 0.0019               | 0.0058                | 0.0416           |
| 134 | PAPUA               | (80) KAB. MANOKWARI (59)              | 0.0153                   | 0.0080                        | 0.0102                     | 0.0335             | 0.0017                          | 0.0024                       | 0.0048                       | 0.0025               | 0.0114                   | 0.0025            | 0.0009                     | 0.0005                  | 0.0009               | 0.0048                | 0.0497           |

Lampiran 4.5.3. Hasil Pembobotan Intensitas Indikator-Indikator Faktor Ekonomi Daerah dengan Metode AHP

| NO. | PROPINSI         | KABUPATEN/KOTA                      | EKONOMI DAERAH              |                  |               |                                 |                                     |                                       |                                      |                                  | TOTAL SCORE<br>0.1676 |
|-----|------------------|-------------------------------------|-----------------------------|------------------|---------------|---------------------------------|-------------------------------------|---------------------------------------|--------------------------------------|----------------------------------|-----------------------|
|     |                  |                                     | Potensi Ekonomi             |                  |               |                                 | Struktur Ekonomi                    |                                       |                                      |                                  |                       |
|     |                  |                                     | PDRB<br>Perkapita<br>0.0481 | Tumbuh<br>0.0463 | IPM<br>0.0239 | Sub Total<br>Potensi<br>Ekonomi | Nilai<br>Tambah<br>Primer<br>0.0219 | Nilai<br>Tambah<br>Sekunder<br>0.0151 | Nilai<br>Tambah<br>Tersier<br>0.0123 | Sub Total<br>Struktur<br>Ekonomi |                       |
| 1   | SUMATERA UTARA   | (105) KAB. DELI SERDANG (32)        | 0.0062                      | 0.0222           | 0.0051        | 0.0335                          | 0.0042                              | 0.0043                                | 0.0004                               | 0.0089                           | 0.0424                |
| 2   | SUMATERA UTARA   | (109) KAB. LANGKAT (64)             | 0.0062                      | 0.0062           | 0.0051        | 0.0175                          | 0.0076                              | 0.0010                                | 0.0004                               | 0.0090                           | 0.0265                |
| 3   | SUMATERA UTARA   | (13) KOTA SIBOLGA (14)              | 0.0126                      | 0.0222           | 0.0051        | 0.0399                          | 0.0042                              | 0.0023                                | 0.0019                               | 0.0084                           | 0.0483                |
| 4   | SUMATERA UTARA   | (29) KAB. ASAHAN (1)                | 0.0247                      | 0.0222           | 0.0051        | 0.0520                          | 0.0076                              | 0.0069                                | 0.0004                               | 0.0149                           | 0.0669                |
| 5   | SUMATERA UTARA   | (4) KAB. DAIRI (39)                 | 0.0062                      | 0.0222           | 0.0051        | 0.0335                          | 0.0042                              | 0.0006                                | 0.0004                               | 0.0052                           | 0.0387                |
| 6   | SUMATERA UTARA   | (49) KOTA PEMATANG SIANTAR (11)     | 0.0247                      | 0.0062           | 0.0079        | 0.0388                          | 0.0016                              | 0.0069                                | 0.0019                               | 0.0104                           | 0.0492                |
| 7   | SUMATERA UTARA   | (54,) KOTA MEDAN (29)               | 0.0247                      | 0.0016           | 0.0079        | 0.0342                          | 0.0016                              | 0.0023                                | 0.0048                               | 0.0087                           | 0.0429                |
| 8   | SUMATERA UTARA   | (61) KOTA TANJUNG BALAI (24)        | 0.0247                      | 0.0062           | 0.0051        | 0.0360                          | 0.0042                              | 0.0023                                | 0.0019                               | 0.0084                           | 0.0444                |
| 9   | SUMATERA UTARA   | (77) KOTA TEBING TINGGI (50)        | 0.0126                      | 0.0016           | 0.0079        | 0.0221                          | 0.0016                              | 0.0043                                | 0.0048                               | 0.0107                           | 0.0328                |
| 10  | SUMATERA UTARA   | (89) KAB. SIMALUNGUN (60)           | 0.0062                      | 0.0062           | 0.0051        | 0.0175                          | 0.0076                              | 0.0023                                | 0.0004                               | 0.0103                           | 0.0278                |
| 11  | SUMATERA UTARA   | (90) KOTA BINJAI (78)               | 0.0062                      | 0.0030           | 0.0051        | 0.0143                          | 0.0016                              | 0.0043                                | 0.0019                               | 0.0078                           | 0.0221                |
| 12  | SUMATERA BARAT   | (123) KAB. PESISIR SELATAN (77)     | 0.0062                      | 0.0030           | 0.0051        | 0.0143                          | 0.0042                              | 0.0023                                | 0.0019                               | 0.0084                           | 0.0227                |
| 13  | SUMATERA BARAT   | (2) KOTA SAWAH LUNTO (34)           | 0.0247                      | 0.0016           | 0.0051        | 0.0314                          | 0.0076                              | 0.0010                                | 0.0019                               | 0.0105                           | 0.0419                |
| 14  | SUMATERA BARAT   | (34) KOTA PADANG (16)               | 0.0247                      | 0.0062           | 0.0079        | 0.0388                          | 0.0016                              | 0.0023                                | 0.0048                               | 0.0087                           | 0.0475                |
| 15  | SUMATERA BARAT   | (84) KAB. SAWAHLUNTO/SIJUNJUNG (57) | 0.0062                      | 0.0062           | 0.0051        | 0.0175                          | 0.0076                              | 0.0023                                | 0.0019                               | 0.0118                           | 0.0293                |
| 16  | R I A U          | (36) KAB. INDRAGIRI HILIR (45)      | 0.0062                      | 0.0133           | 0.0051        | 0.0246                          | 0.0076                              | 0.0010                                | 0.0019                               | 0.0105                           | 0.0351                |
| 17  | R I A U          | (5) KOTA BATAM (3)                  | 0.0247                      | 0.0222           | 0.0079        | 0.0548                          | 0.0009                              | 0.0069                                | 0.0004                               | 0.0082                           | 0.0630                |
| 18  | R I A U          | (55) KAB. BENGKALIS (49)            | 0.0062                      | 0.0133           | 0.0051        | 0.0246                          | 0.0042                              | 0.0023                                | 0.0019                               | 0.0084                           | 0.0330                |
| 19  | R I A U          | (74) KAB. KAMPAR (94)               | 0.0016                      | 0.0016           | 0.0051        | 0.0083                          | 0.0076                              | 0.0010                                | 0.0008                               | 0.0094                           | 0.0177                |
| 20  | R I A U          | (9) KOTA PEKAN BARU (10)            | 0.0126                      | 0.0222           | 0.0079        | 0.0427                          | 0.0009                              | 0.0023                                | 0.0048                               | 0.0080                           | 0.0507                |
| 21  | J A M B I        | (23) KAB. BATANGHARI (87)           | 0.0016                      | 0.0016           | 0.0051        | 0.0083                          | 0.0076                              | 0.0023                                | 0.0019                               | 0.0118                           | 0.0201                |
| 22  | J A M B I        | (35) KAB. KERINCI (81)              | 0.0062                      | 0.0030           | 0.0051        | 0.0143                          | 0.0042                              | 0.0010                                | 0.0019                               | 0.0071                           | 0.0214                |
| 23  | J A M B I        | (42) KAB. BUNGOTEBO (101)           | 0.0016                      | 0.0016           | 0.0051        | 0.0083                          | 0.0042                              | 0.0010                                | 0.0019                               | 0.0071                           | 0.0154                |
| 24  | SUMATERA SELATAN | (113) KAB. OGAN KOMERING ILIR (72)  | 0.0062                      | 0.0062           | 0.0014        | 0.0138                          | 0.0076                              | 0.0023                                | 0.0008                               | 0.0107                           | 0.0245                |
| 25  | SUMATERA SELATAN | (12) KOTA PALEMBANG (54)            | 0.0126                      | 0.0030           | 0.0051        | 0.0207                          | 0.0009                              | 0.0069                                | 0.0019                               | 0.0097                           | 0.0304                |
| 26  | SUMATERA SELATAN | (68) KAB. MUARA ENIM (64)           | 0.0062                      | 0.0062           | 0.0051        | 0.0175                          | 0.0076                              | 0.0010                                | 0.0004                               | 0.0090                           | 0.0265                |
| 27  | SUMATERA SELATAN | (70) KAB. MUSI BANYUASIN (86)       | 0.0062                      | 0.0030           | 0.0008        | 0.0100                          | 0.0076                              | 0.0023                                | 0.0004                               | 0.0103                           | 0.0203                |
| 28  | SUMATERA SELATAN | (88) KAB. MUSI RAWAS (71)           | 0.0030                      | 0.0062           | 0.0051        | 0.0143                          | 0.0076                              | 0.0023                                | 0.0004                               | 0.0103                           | 0.0246                |

| NO. | PROPINSI        | KABUPATEN/KOTA                    | EKONOMI DAERAH              |                  |               |                                 |                                     |                                       |                                      |                                  | TOTAL SCORE<br>0.1676 |
|-----|-----------------|-----------------------------------|-----------------------------|------------------|---------------|---------------------------------|-------------------------------------|---------------------------------------|--------------------------------------|----------------------------------|-----------------------|
|     |                 |                                   | Potensi Ekonomi             |                  |               |                                 | Struktur Ekonomi                    |                                       |                                      |                                  |                       |
|     |                 |                                   | PDRB<br>Perkapita<br>0.0481 | Tumbuh<br>0.0463 | IPM<br>0.0239 | Sub Total<br>Potensi<br>Ekonomi | Nilai<br>Tambah<br>Primer<br>0.0219 | Nilai<br>Tambah<br>Sekunder<br>0.0151 | Nilai<br>Tambah<br>Tersier<br>0.0123 | Sub Total<br>Struktur<br>Ekonomi |                       |
| 29  | BANGKA BELITUNG | (102) KOTA PANGKAL PINANG (44)    | 0.0062                      | 0.0133           | 0.0051        | 0.0246                          | 0.0042                              | 0.0023                                | 0.0048                               | 0.0113                           | 0.0359                |
| 30  | BANGKA BELITUNG | (59) KAB. BANGKA (21)             | 0.0126                      | 0.0133           | 0.0051        | 0.0310                          | 0.0076                              | 0.0069                                | 0.0004                               | 0.0149                           | 0.0459                |
| 31  | BENGKULU        | (121) KAB. BENGKULU SELATAN (101) | 0.0016                      | 0.0016           | 0.0051        | 0.0083                          | 0.0042                              | 0.0010                                | 0.0019                               | 0.0071                           | 0.0154                |
| 32  | BENGKULU        | (91) KOTA BENGKULU (46)           | 0.0062                      | 0.0133           | 0.0079        | 0.0274                          | 0.0016                              | 0.0010                                | 0.0048                               | 0.0074                           | 0.0348                |
| 33  | LAMPUNG         | (122) KAB. LAMPUNG SELATAN (85)   | 0.0030                      | 0.0016           | 0.0051        | 0.0097                          | 0.0076                              | 0.0023                                | 0.0008                               | 0.0107                           | 0.0204                |
| 34  | LAMPUNG         | (125) KAB. LAMPUNG TIMUR (73)     | 0.0016                      | 0.0133           | 0.0000        | 0.0149                          | 0.0076                              | 0.0010                                | 0.0008                               | 0.0094                           | 0.0243                |
| 35  | LAMPUNG         | (37) KOTA BANDAR LAMPUNG (20)     | 0.0247                      | 0.0030           | 0.0051        | 0.0328                          | 0.0016                              | 0.0069                                | 0.0048                               | 0.0133                           | 0.0461                |
| 36  | LAMPUNG         | (43) KAB. LAMPUNG BARAT (38)      | 0.0030                      | 0.0222           | 0.0051        | 0.0303                          | 0.0076                              | 0.0006                                | 0.0004                               | 0.0086                           | 0.0389                |
| 37  | BANTEN          | (30) KAB. TANGERANG (65)          | 0.0062                      | 0.0062           | 0.0051        | 0.0175                          | 0.0016                              | 0.0069                                | 0.0004                               | 0.0089                           | 0.0264                |
| 38  | BANTEN          | (57) KAB. SERANG (79)             | 0.0062                      | 0.0016           | 0.0051        | 0.0129                          | 0.0016                              | 0.0069                                | 0.0004                               | 0.0089                           | 0.0218                |
| 39  | BANTEN          | (6) TA TANGERANG (22)             | 0.0247                      | 0.0062           | 0.0051        | 0.0360                          | 0.0009                              | 0.0069                                | 0.0019                               | 0.0097                           | 0.0457                |
| 40  | BANTEN          | (75) KAB. LEBAK (81)              | 0.0030                      | 0.0062           | 0.0051        | 0.0143                          | 0.0042                              | 0.0010                                | 0.0019                               | 0.0071                           | 0.0214                |
| 41  | JAWA BARAT      | (106) KAB. CIAMIS (82)            | 0.0062                      | 0.0016           | 0.0051        | 0.0129                          | 0.0042                              | 0.0023                                | 0.0019                               | 0.0084                           | 0.0213                |
| 42  | JAWA BARAT      | (107) KAB. SUKABUMI (77)          | 0.0030                      | 0.0062           | 0.0051        | 0.0143                          | 0.0042                              | 0.0023                                | 0.0019                               | 0.0084                           | 0.0227                |
| 43  | JAWA BARAT      | (111) KAB. KUNINGAN (99)          | 0.0030                      | 0.0030           | 0.0051        | 0.0111                          | 0.0016                              | 0.0010                                | 0.0019                               | 0.0045                           | 0.0156                |
| 44  | JAWA BARAT      | (114) KAB. GARUT (104)            | 0.0030                      | 0.0016           | 0.0051        | 0.0097                          | 0.0016                              | 0.0010                                | 0.0019                               | 0.0045                           | 0.0142                |
| 45  | JAWA BARAT      | (115) KAB. CIREBON (100)          | 0.0030                      | 0.0016           | 0.0051        | 0.0097                          | 0.0016                              | 0.0023                                | 0.0019                               | 0.0058                           | 0.0155                |
| 46  | JAWA BARAT      | (118) KAB. SUMEDANG (100)         | 0.0030                      | 0.0016           | 0.0051        | 0.0097                          | 0.0016                              | 0.0023                                | 0.0019                               | 0.0058                           | 0.0155                |
| 47  | JAWA BARAT      | (119) KAB. TASIKMALAYA (89)       | 0.0030                      | 0.0030           | 0.0051        | 0.0111                          | 0.0042                              | 0.0023                                | 0.0019                               | 0.0084                           | 0.0195                |
| 48  | JAWA BARAT      | (22) KOTA BEKASI (58)             | 0.0126                      | 0.0016           | 0.0051        | 0.0193                          | 0.0009                              | 0.0069                                | 0.0019                               | 0.0097                           | 0.0290                |
| 49  | JAWA BARAT      | (24) KOTA BOGOR (18)              | 0.0062                      | 0.0222           | 0.0079        | 0.0363                          | 0.0009                              | 0.0043                                | 0.0048                               | 0.0100                           | 0.0463                |
| 50  | JAWA BARAT      | (41) KOTA CIREBON (5)             | 0.0247                      | 0.0222           | 0.0051        | 0.0520                          | 0.0009                              | 0.0069                                | 0.0019                               | 0.0097                           | 0.0617                |
| 51  | JAWA BARAT      | (47) KAB. BOGOR (95)              | 0.0016                      | 0.0016           | 0.0051        | 0.0083                          | 0.0016                              | 0.0069                                | 0.0008                               | 0.0093                           | 0.0176                |
| 52  | JAWA BARAT      | (60) KOTA SUKABUMI (88)           | 0.0062                      | 0.0016           | 0.0051        | 0.0129                          | 0.0009                              | 0.0010                                | 0.0048                               | 0.0067                           | 0.0196                |
| 53  | JAWA BARAT      | (65) KAB. KARAWANG (78)           | 0.0062                      | 0.0030           | 0.0051        | 0.0143                          | 0.0016                              | 0.0043                                | 0.0019                               | 0.0078                           | 0.0221                |
| 54  | JAWA BARAT      | (7) KAB. BEKASI (6)               | 0.0247                      | 0.0222           | 0.0051        | 0.0520                          | 0.0009                              | 0.0069                                | 0.0004                               | 0.0082                           | 0.0602                |
| 55  | JAWA BARAT      | (73) KAB. INDRAMAYU (42)          | 0.0247                      | 0.0016           | 0.0014        | 0.0277                          | 0.0076                              | 0.0010                                | 0.0004                               | 0.0090                           | 0.0367                |
| 56  | JAWA TENGAH     | (1) KOTA SEMARANG (12)            | 0.0247                      | 0.0062           | 0.0079        | 0.0388                          | 0.0009                              | 0.0043                                | 0.0048                               | 0.0100                           | 0.0488                |
| 57  | JAWA TENGAH     | (10) KAB. KENDAL (69)             | 0.0062                      | 0.0016           | 0.0051        | 0.0129                          | 0.0042                              | 0.0069                                | 0.0008                               | 0.0119                           | 0.0248                |



| NO. | PROPINSI        | KABUPATEN/KOTA             | EKONOMI DAERAH              |                  |               |                                 |                                     |                                       |                                      |                                  | TOTAL SCORE<br>0.1676 |
|-----|-----------------|----------------------------|-----------------------------|------------------|---------------|---------------------------------|-------------------------------------|---------------------------------------|--------------------------------------|----------------------------------|-----------------------|
|     |                 |                            | Potensi Ekonomi             |                  |               |                                 | Struktur Ekonomi                    |                                       |                                      |                                  |                       |
|     |                 |                            | PDRB<br>Perkapita<br>0.0481 | Tumbuh<br>0.0463 | IPM<br>0.0239 | Sub Total<br>Potensi<br>Ekonomi | Nilai<br>Tambah<br>Primer<br>0.0219 | Nilai<br>Tambah<br>Sekunder<br>0.0151 | Nilai<br>Tambah<br>Tersier<br>0.0123 | Sub Total<br>Struktur<br>Ekonomi |                       |
| 58  | JAWA TENGAH     | (11) KAB. PEMALANG (82)    | 0.0016                      | 0.0062           | 0.0051        | 0.0129                          | 0.0042                              | 0.0023                                | 0.0019                               | 0.0084                           | 0.0213                |
| 59  | JAWA TENGAH     | (14) KOTA PEKALONGAN (70)  | 0.0062                      | 0.0030           | 0.0051        | 0.0143                          | 0.0042                              | 0.0043                                | 0.0019                               | 0.0104                           | 0.0247                |
| 60  | JAWA TENGAH     | (19) KAB. PEKALONGAN (84)  | 0.0062                      | 0.0016           | 0.0051        | 0.0129                          | 0.0016                              | 0.0043                                | 0.0019                               | 0.0078                           | 0.0207                |
| 61  | JAWA TENGAH     | (27) KAB. MAGELANG (89)    | 0.0030                      | 0.0030           | 0.0051        | 0.0111                          | 0.0042                              | 0.0023                                | 0.0019                               | 0.0084                           | 0.0195                |
| 62  | JAWA TENGAH     | (28) KAB. TEGAL (100)      | 0.0016                      | 0.0030           | 0.0051        | 0.0097                          | 0.0016                              | 0.0023                                | 0.0019                               | 0.0058                           | 0.0155                |
| 63  | JAWA TENGAH     | (3) KOTA TEGAL (53)        | 0.0062                      | 0.0062           | 0.0051        | 0.0175                          | 0.0042                              | 0.0043                                | 0.0048                               | 0.0133                           | 0.0308                |
| 64  | JAWA TENGAH     | (50) KAB. SUKOHARJO (84)   | 0.0062                      | 0.0016           | 0.0051        | 0.0129                          | 0.0016                              | 0.0043                                | 0.0019                               | 0.0078                           | 0.0207                |
| 65  | D.I. YOGYAKARTA | (33) KOTA YOGYAKARTA (33)  | 0.0247                      | 0.0016           | 0.0079        | 0.0342                          | 0.0009                              | 0.0023                                | 0.0048                               | 0.0080                           | 0.0422                |
| 66  | JAWA TIMUR      | (112) KAB. BANGKALAN (103) | 0.0030                      | 0.0062           | 0.0008        | 0.0100                          | 0.0016                              | 0.0010                                | 0.0019                               | 0.0045                           | 0.0145                |
| 67  | JAWA TIMUR      | (120) KAB. PAMEKASAN (106) | 0.0016                      | 0.0016           | 0.0008        | 0.0040                          | 0.0076                              | 0.0006                                | 0.0008                               | 0.0090                           | 0.0130                |
| 68  | JAWA TIMUR      | (15) KOTA MALANG (30)      | 0.0247                      | 0.0030           | 0.0051        | 0.0328                          | 0.0009                              | 0.0043                                | 0.0048                               | 0.0100                           | 0.0428                |
| 69  | JAWA TIMUR      | (17) KAB. SIDOARJO (23)    | 0.0247                      | 0.0016           | 0.0079        | 0.0342                          | 0.0016                              | 0.0069                                | 0.0019                               | 0.0104                           | 0.0446                |
| 70  | JAWA TIMUR      | (18) KOTA SURABAYA (26)    | 0.0247                      | 0.0016           | 0.0079        | 0.0342                          | 0.0009                              | 0.0069                                | 0.0019                               | 0.0097                           | 0.0439                |
| 71  | JAWA TIMUR      | (56) KAB. PASURUAN (107)   | 0.0030                      | 0.0016           | 0.0014        | 0.0060                          | 0.0016                              | 0.0043                                | 0.0008                               | 0.0067                           | 0.0127                |
| 72  | JAWA TIMUR      | (72) KAB. MOJOKERTO (75)   | 0.0062                      | 0.0016           | 0.0051        | 0.0129                          | 0.0042                              | 0.0043                                | 0.0019                               | 0.0104                           | 0.0233                |
| 73  | JAWA TIMUR      | (8) KOTA KEDIRI (6)        | 0.0247                      | 0.0222           | 0.0051        | 0.0520                          | 0.0009                              | 0.0069                                | 0.0004                               | 0.0082                           | 0.0602                |
| 74  | JAWA TIMUR      | (82) KAB. KEDIRI (81)      | 0.0030                      | 0.0062           | 0.0051        | 0.0143                          | 0.0042                              | 0.0010                                | 0.0019                               | 0.0071                           | 0.0214                |
| 75  | JAWA TIMUR      | (85) KOTA MOJOKERTO (67)   | 0.0062                      | 0.0062           | 0.0051        | 0.0175                          | 0.0009                              | 0.0023                                | 0.0048                               | 0.0080                           | 0.0255                |
| 76  | JAWA TIMUR      | (87) KAB. BLITAR (83)      | 0.0030                      | 0.0062           | 0.0051        | 0.0143                          | 0.0042                              | 0.0006                                | 0.0019                               | 0.0067                           | 0.0210                |
| 77  | JAWA TIMUR      | (92) KOTA PROBOLINGGO (55) | 0.0126                      | 0.0016           | 0.0051        | 0.0193                          | 0.0016                              | 0.0043                                | 0.0048                               | 0.0107                           | 0.0300                |
| 78  | JAWA TIMUR      | (96) KAB. MAGETAN (100)    | 0.0030                      | 0.0016           | 0.0051        | 0.0097                          | 0.0016                              | 0.0023                                | 0.0019                               | 0.0058                           | 0.0155                |
| 79  | JAWA TIMUR      | (99) KAB. BANYUWANGI (74)  | 0.0062                      | 0.0062           | 0.0051        | 0.0175                          | 0.0042                              | 0.0006                                | 0.0019                               | 0.0067                           | 0.0242                |
| 80  | BALI            | (16) KAB. GIANYAR (56)     | 0.0126                      | 0.0062           | 0.0051        | 0.0239                          | 0.0016                              | 0.0023                                | 0.0019                               | 0.0058                           | 0.0297                |
| 81  | BALI            | (20) KAB. BADUNG (27)      | 0.0247                      | 0.0062           | 0.0051        | 0.0360                          | 0.0016                              | 0.0010                                | 0.0048                               | 0.0074                           | 0.0434                |
| 82  | BALI            | (26) KOTA DENPASAR (16)    | 0.0247                      | 0.0062           | 0.0079        | 0.0388                          | 0.0016                              | 0.0023                                | 0.0048                               | 0.0087                           | 0.0475                |
| 83  | BALI            | (52) KAB. TABANAN (81)     | 0.0062                      | 0.0030           | 0.0051        | 0.0143                          | 0.0042                              | 0.0010                                | 0.0019                               | 0.0071                           | 0.0214                |
| 84  | BALI            | (53) KAB. JEMBRANA (62)    | 0.0062                      | 0.0062           | 0.0051        | 0.0175                          | 0.0042                              | 0.0010                                | 0.0048                               | 0.0100                           | 0.0275                |
| 85  | BALI            | (62) KAB. BULELENG (62)    | 0.0062                      | 0.0062           | 0.0051        | 0.0175                          | 0.0042                              | 0.0010                                | 0.0048                               | 0.0100                           | 0.0275                |
| 86  | BALI            | (71) KAB. BANGLI (91)      | 0.0062                      | 0.0030           | 0.0051        | 0.0143                          | 0.0016                              | 0.0010                                | 0.0019                               | 0.0045                           | 0.0188                |

| NO. | PROPINSI           | KABUPATEN/KOTA                      | EKONOMI DAERAH              |                  |               |                                 |                                     |                                       |                                      |                                  | TOTAL SCORE<br>0.1676 |
|-----|--------------------|-------------------------------------|-----------------------------|------------------|---------------|---------------------------------|-------------------------------------|---------------------------------------|--------------------------------------|----------------------------------|-----------------------|
|     |                    |                                     | Potensi Ekonomi             |                  |               |                                 | Struktur Ekonomi                    |                                       |                                      |                                  |                       |
|     |                    |                                     | PDRB<br>Perkapita<br>0.0481 | Tumbuh<br>0.0463 | IPM<br>0.0239 | Sub Total<br>Potensi<br>Ekonomi | Nilai<br>Tambah<br>Primer<br>0.0219 | Nilai<br>Tambah<br>Sekunder<br>0.0151 | Nilai<br>Tambah<br>Tersier<br>0.0123 | Sub Total<br>Struktur<br>Ekonomi |                       |
| 87  | KALIMANTAN BARAT   | (103) KAB. SAMBAS (69)              | 0.0030                      | 0.0133           | 0.0014        | 0.0177                          | 0.0042                              | 0.0010                                | 0.0019                               | 0.0071                           | 0.0248                |
| 88  | KALIMANTAN BARAT   | (104) KAB. KAPUAS HULU (45)         | 0.0062                      | 0.0133           | 0.0051        | 0.0246                          | 0.0076                              | 0.0010                                | 0.0019                               | 0.0105                           | 0.0351                |
| 89  | KALIMANTAN BARAT   | (110) KAB. KETAPANG (49)            | 0.0062                      | 0.0133           | 0.0051        | 0.0246                          | 0.0042                              | 0.0023                                | 0.0019                               | 0.0084                           | 0.0330                |
| 90  | KALIMANTAN BARAT   | (74) KAB. SANGGAU (19)              | 0.0062                      | 0.0222           | 0.0051        | 0.0335                          | 0.0076                              | 0.0043                                | 0.0008                               | 0.0127                           | 0.0462                |
| 91  | KALIMANTAN BARAT   | (86) KAB. PONTIANAK (66)            | 0.0062                      | 0.0030           | 0.0051        | 0.0143                          | 0.0042                              | 0.0069                                | 0.0008                               | 0.0119                           | 0.0262                |
| 92  | KALIMANTAN TENGAH  | (69) KAB. BARITO UTARA (9)          | 0.0247                      | 0.0133           | 0.0051        | 0.0431                          | 0.0076                              | 0.0010                                | 0.0008                               | 0.0094                           | 0.0525                |
| 93  | KALIMANTAN TENGAH  | (74) KAB. BARITO SELATAN (48)       | 0.0126                      | 0.0062           | 0.0051        | 0.0239                          | 0.0076                              | 0.0010                                | 0.0019                               | 0.0105                           | 0.0344                |
| 94  | KALIMANTAN TENGAH  | (95) KAB. KAPUAS (68)               | 0.0062                      | 0.0030           | 0.0051        | 0.0143                          | 0.0076                              | 0.0023                                | 0.0008                               | 0.0107                           | 0.0250                |
| 95  | KALIMANTAN SELATAN | (108) KAB. HULU SUNGAI SELATAN (81) | 0.0062                      | 0.0030           | 0.0051        | 0.0143                          | 0.0042                              | 0.0010                                | 0.0019                               | 0.0071                           | 0.0214                |
| 96  | KALIMANTAN SELATAN | (116) KAB. TAPIN (52)               | 0.0062                      | 0.0133           | 0.0051        | 0.0246                          | 0.0042                              | 0.0010                                | 0.0019                               | 0.0071                           | 0.0317                |
| 97  | KALIMANTAN SELATAN | (69) KAB. TABALONG (13)             | 0.0126                      | 0.0222           | 0.0051        | 0.0399                          | 0.0076                              | 0.0006                                | 0.0004                               | 0.0086                           | 0.0485                |
| 98  | KALIMANTAN SELATAN | (78) KAB. HULU SUNGAI TENGAH (37)   | 0.0030                      | 0.0222           | 0.0051        | 0.0303                          | 0.0076                              | 0.0010                                | 0.0004                               | 0.0090                           | 0.0393                |
| 99  | KALIMANTAN SELATAN | (81) KAB. HULU SUNGAI UTARA (40)    | 0.0247                      | 0.0016           | 0.0051        | 0.0314                          | 0.0042                              | 0.0010                                | 0.0019                               | 0.0071                           | 0.0385                |
| 100 | KALIMANTAN SELATAN | (83) KAB. TANAH LAUT (61)           | 0.0126                      | 0.0016           | 0.0051        | 0.0193                          | 0.0042                              | 0.0023                                | 0.0019                               | 0.0084                           | 0.0277                |
| 101 | KALIMANTAN TIMUR   | (2) KOTA BALIKPAPAN (2)             | 0.0247                      | 0.0222           | 0.0079        | 0.0548                          | 0.0016                              | 0.0069                                | 0.0019                               | 0.0104                           | 0.0652                |
| 102 | KALIMANTAN TIMUR   | (21) KAB. BERAU (4)                 | 0.0247                      | 0.0222           | 0.0051        | 0.0520                          | 0.0076                              | 0.0023                                | 0.0004                               | 0.0103                           | 0.0623                |
| 103 | KALIMANTAN TIMUR   | (22) KAB. KUTAI (13)                | 0.0126                      | 0.0222           | 0.0051        | 0.0399                          | 0.0076                              | 0.0006                                | 0.0004                               | 0.0086                           | 0.0485                |
| 104 | KALIMANTAN TIMUR   | (39) KOTA SAMARINDA (7)             | 0.0247                      | 0.0133           | 0.0079        | 0.0459                          | 0.0009                              | 0.0043                                | 0.0048                               | 0.0100                           | 0.0559                |
| 105 | KALIMANTAN TIMUR   | (64) KAB. PASIR (8)                 | 0.0247                      | 0.0133           | 0.0051        | 0.0431                          | 0.0076                              | 0.0023                                | 0.0004                               | 0.0103                           | 0.0534                |
| 106 | SULAWESI UTARA     | (38) KOTA MANADO (31)               | 0.0126                      | 0.0133           | 0.0079        | 0.0338                          | 0.0016                              | 0.0023                                | 0.0048                               | 0.0087                           | 0.0425                |
| 107 | SULAWESI UTARA     | (44) KOTA BITUNG (15)               | 0.0126                      | 0.0222           | 0.0051        | 0.0399                          | 0.0016                              | 0.0043                                | 0.0019                               | 0.0078                           | 0.0477                |
| 108 | SULAWESI UTARA     | (45) KAB. MINAHASA (17)             | 0.0062                      | 0.0222           | 0.0079        | 0.0363                          | 0.0076                              | 0.0023                                | 0.0008                               | 0.0107                           | 0.0470                |
| 109 | SULAWESI UTARA     | (76) KAB. SANGIHE TALAUD (25)       | 0.0062                      | 0.0222           | 0.0051        | 0.0335                          | 0.0076                              | 0.0010                                | 0.0019                               | 0.0105                           | 0.0440                |
| 110 | GORONTALO          | (101) KAB. GORONTALO (96)           | 0.0016                      | 0.0016           | 0.0051        | 0.0083                          | 0.0042                              | 0.0023                                | 0.0019                               | 0.0084                           | 0.0167                |
| 111 | GORONTALO          | (46) KOTA GORONTALO (41)            | 0.0030                      | 0.0222           | 0.0051        | 0.0303                          | 0.0016                              | 0.0010                                | 0.0048                               | 0.0074                           | 0.0377                |
| 112 | SULAWESI TENGAH    | (100) KAB. POSO (76)                | 0.0016                      | 0.0062           | 0.0051        | 0.0129                          | 0.0076                              | 0.0023                                | 0.0004                               | 0.0103                           | 0.0232                |
| 113 | SULAWESI TENGAH    | (28) KAB. BANGGAI (35)              | 0.0030                      | 0.0222           | 0.0051        | 0.0303                          | 0.0076                              | 0.0023                                | 0.0008                               | 0.0107                           | 0.0410                |
| 114 | SULAWESI TENGAH    | (39) KAB. TOLI TOLI (36)            | 0.0030                      | 0.0222           | 0.0051        | 0.0303                          | 0.0076                              | 0.0010                                | 0.0008                               | 0.0094                           | 0.0397                |
| 115 | SULAWESI TENGAH    | (40) KAB. DONGGALA (75)             | 0.0030                      | 0.0062           | 0.0051        | 0.0143                          | 0.0076                              | 0.0010                                | 0.0004                               | 0.0090                           | 0.0233                |

| NO. | PROPINSI            | KABUPATEN/KOTA                        | EKONOMI DAERAH              |                  |               |                                 |                                     |                                       |                                      |                                  | TOTAL SCORE<br>0.1676 |
|-----|---------------------|---------------------------------------|-----------------------------|------------------|---------------|---------------------------------|-------------------------------------|---------------------------------------|--------------------------------------|----------------------------------|-----------------------|
|     |                     |                                       | Potensi Ekonomi             |                  |               |                                 | Struktur Ekonomi                    |                                       |                                      |                                  |                       |
|     |                     |                                       | PDRB<br>Perkapita<br>0.0481 | Tumbuh<br>0.0463 | IPM<br>0.0239 | Sub Total<br>Potensi<br>Ekonomi | Nilai<br>Tambah<br>Primer<br>0.0219 | Nilai<br>Tambah<br>Sekunder<br>0.0151 | Nilai<br>Tambah<br>Tersier<br>0.0123 | Sub Total<br>Struktur<br>Ekonomi |                       |
| 116 | SULAWESI TENGAH     | (51) KAB. MOROWALI (59)               | 0.0062                      | 0.0133           | 0.0000        | 0.0195                          | 0.0076                              | 0.0010                                | 0.0008                               | 0.0094                           | 0.0289                |
| 117 | SULAWESI TENGGARA   | (48) KAB. KOLAKA (47)                 | 0.0126                      | 0.0062           | 0.0051        | 0.0239                          | 0.0076                              | 0.0023                                | 0.0008                               | 0.0107                           | 0.0346                |
| 118 | SULAWESI TENGGARA   | (79) KAB. BUTON (93)                  | 0.0030                      | 0.0016           | 0.0051        | 0.0097                          | 0.0042                              | 0.0023                                | 0.0019                               | 0.0084                           | 0.0181                |
| 119 | SULAWESI SELATAN    | (25) KOTA PARE-PARE (46)              | 0.0062                      | 0.0133           | 0.0079        | 0.0274                          | 0.0016                              | 0.0010                                | 0.0048                               | 0.0074                           | 0.0348                |
| 120 | SULAWESI SELATAN    | (31) KAB. PANGKAJENE & KEPULAUAN (43) | 0.0062                      | 0.0133           | 0.0051        | 0.0246                          | 0.0042                              | 0.0069                                | 0.0004                               | 0.0115                           | 0.0361                |
| 121 | SULAWESI SELATAN    | (63) KAB. PINRANG (75)                | 0.0062                      | 0.0030           | 0.0051        | 0.0143                          | 0.0076                              | 0.0010                                | 0.0004                               | 0.0090                           | 0.0233                |
| 122 | SULAWESI SELATAN    | (93) KAB. TANA TORAJA (90)            | 0.0016                      | 0.0062           | 0.0051        | 0.0129                          | 0.0042                              | 0.0010                                | 0.0008                               | 0.0060                           | 0.0189                |
| 123 | SULAWESI SELATAN    | (94) KAB. MAJENE (63)                 | 0.0062                      | 0.0062           | 0.0051        | 0.0175                          | 0.0076                              | 0.0010                                | 0.0008                               | 0.0094                           | 0.0269                |
| 124 | SULAWESI SELATAN    | (98) KAB. LUWU (92)                   | 0.0016                      | 0.0016           | 0.0051        | 0.0083                          | 0.0076                              | 0.0023                                | 0.0004                               | 0.0103                           | 0.0186                |
| 125 | NUSA TENGGARA BARAT | (124) KAB. LOMBOK BARAT (105)         | 0.0030                      | 0.0030           | 0.0008        | 0.0068                          | 0.0042                              | 0.0010                                | 0.0019                               | 0.0071                           | 0.0139                |
| 126 | NUSA TENGGARA BARAT | (126) KAB. BIMA (94)                  | 0.0030                      | 0.0062           | 0.0014        | 0.0106                          | 0.0042                              | 0.0010                                | 0.0019                               | 0.0071                           | 0.0177                |
| 127 | NUSA TENGGARA BARAT | (66) KOTA MATARAM (51)                | 0.0062                      | 0.0133           | 0.0051        | 0.0246                          | 0.0009                              | 0.0023                                | 0.0048                               | 0.0080                           | 0.0326                |
| 128 | NUSA TENGGARA TIMUR | (117) KAB. ENDE (97)                  | 0.0016                      | 0.0062           | 0.0014        | 0.0092                          | 0.0042                              | 0.0010                                | 0.0019                               | 0.0071                           | 0.0163                |
| 129 | NUSA TENGGARA TIMUR | (120) KAB. FLORES TIMUR (98)          | 0.0016                      | 0.0062           | 0.0014        | 0.0092                          | 0.0042                              | 0.0006                                | 0.0019                               | 0.0067                           | 0.0159                |
| 130 | NUSA TENGGARA TIMUR | (32) KOTA KUPANG (80)                 | 0.0062                      | 0.0016           | 0.0051        | 0.0129                          | 0.0016                              | 0.0023                                | 0.0048                               | 0.0087                           | 0.0216                |
| 131 | NUSA TENGGARA TIMUR | (72) KAB. TIMOR TENGAH UTARA (102)    | 0.0016                      | 0.0062           | 0.0008        | 0.0086                          | 0.0042                              | 0.0010                                | 0.0008                               | 0.0060                           | 0.0146                |
| 132 | NUSA TENGGARA TIMUR | (97) KAB. TIMOR TENGAH SELATAN (104)  | 0.0016                      | 0.0062           | 0.0008        | 0.0086                          | 0.0042                              | 0.0006                                | 0.0008                               | 0.0056                           | 0.0142                |
| 133 | PAPUA               | (58) KAB. FAKFAK (28)                 | 0.0030                      | 0.0222           | 0.0051        | 0.0303                          | 0.0076                              | 0.0043                                | 0.0008                               | 0.0127                           | 0.0430                |
| 134 | PAPUA               | (80) KAB. MANOKWARI (71)              | 0.0062                      | 0.0030           | 0.0051        | 0.0143                          | 0.0076                              | 0.0023                                | 0.0004                               | 0.0103                           | 0.0246                |

Lampiran 4.5.4. Hasil Pembobotan Intensitas Indikator-Indikator Faktor Tenaga Kerja & Produktivitas dengan Metode AHP



| NO. | PROPINSI         | KABUPATEN/KOTA                       | TENAGA KERJA & PRODUKTIVITAS |                |                         |                                     |                    |                           |                              |                         | TOTAL SCORE |
|-----|------------------|--------------------------------------|------------------------------|----------------|-------------------------|-------------------------------------|--------------------|---------------------------|------------------------------|-------------------------|-------------|
|     |                  |                                      | Ketersediaan Tenaga Kerja    |                |                         |                                     | Biaya Tenaga Kerja |                           |                              |                         |             |
|     |                  |                                      | Usia Produktif<br>0.0099     | SLTP<br>0.0097 | Pencari Kerja<br>0.0235 | Sub Total Ketersediaan Tenaga Kerja | UMP/IHK<br>0.0144  | Upah Aktual/IHK<br>0.0163 | Sub Total Biaya Tenaga Kerja | Produktivitas<br>0.0525 |             |
| 1   | SUMATERA UTARA   | (105) KAB. DELI SERDANG (64)         | 0.0019                       | 0.0025         | 0.0031                  | 0.0075                              | 0.0060             | 0.0020                    | 0.0080                       | 0.0066                  | 0.0221      |
| 2   | SUMATERA UTARA   | (109) KAB. LANGKAT (35)              | 0.0015                       | 0.0027         | 0.0008                  | 0.0050                              | 0.0060             | 0.0088                    | 0.0148                       | 0.0140                  | 0.0338      |
| 3   | SUMATERA UTARA   | (13) KOTA SIBOLGA (9)                | 0.0015                       | 0.0032         | 0.0113                  | 0.0160                              | 0.0015             | 0.0020                    | 0.0035                       | 0.0273                  | 0.0468      |
| 4   | SUMATERA UTARA   | (28) KAB. ASAHAN (11)                | 0.0006                       | 0.0027         | 0.0008                  | 0.0041                              | 0.0060             | 0.0088                    | 0.0148                       | 0.0273                  | 0.0462      |
| 5   | SUMATERA UTARA   | (4) KAB. DAIRI (95)                  | 0.0006                       | 0.0025         | 0.0015                  | 0.0046                              | 0.0060             | 0.0020                    | 0.0080                       | 0.0028                  | 0.0154      |
| 6   | SUMATERA UTARA   | (49) KOTA PEMATANG SIANTAR (8)       | 0.0015                       | 0.0032         | 0.0008                  | 0.0055                              | 0.0060             | 0.0088                    | 0.0148                       | 0.0273                  | 0.0476      |
| 7   | SUMATERA UTARA   | (54) KOTA MEDAN (24)                 | 0.0025                       | 0.0032         | 0.0113                  | 0.0170                              | 0.0060             | 0.0020                    | 0.0080                       | 0.0140                  | 0.0390      |
| 8   | SUMATERA UTARA   | (61) KOTA TANJUNG BALAI (16)         | 0.0015                       | 0.0025         | 0.0113                  | 0.0153                              | 0.0060             | 0.0088                    | 0.0148                       | 0.0140                  | 0.0441      |
| 9   | SUMATERA UTARA   | (77) KOTA TEBING TINGGI (25)         | 0.0019                       | 0.0032         | 0.0113                  | 0.0164                              | 0.0060             | 0.0020                    | 0.0080                       | 0.0140                  | 0.0384      |
| 10  | SUMATERA UTARA   | (89) KAB. SIMALUNGUN (19)            | 0.0015                       | 0.0027         | 0.0031                  | 0.0073                              | 0.0060             | 0.0020                    | 0.0080                       | 0.0273                  | 0.0426      |
| 11  | SUMATERA UTARA   | (90) KOTA BINJAI (25)                | 0.0025                       | 0.0032         | 0.0113                  | 0.0170                              | 0.0060             | 0.0088                    | 0.0148                       | 0.0066                  | 0.0384      |
| 12  | SUMATERA BARAT   | (123) KAB. PESISIR SELATAN (59)      | 0.0006                       | 0.0027         | 0.0031                  | 0.0064                              | 0.0022             | 0.0020                    | 0.0042                       | 0.0140                  | 0.0246      |
| 13  | SUMATERA BARAT   | (2) KOTA SAWAH LUNTO (42)            | 0.0015                       | 0.0025         | 0.0015                  | 0.0055                              | 0.0022             | 0.0088                    | 0.0110                       | 0.0140                  | 0.0305      |
| 14  | SUMATERA BARAT   | (34) KOTA PADANG (7)                 | 0.0025                       | 0.0032         | 0.0113                  | 0.0170                              | 0.0022             | 0.0014                    | 0.0036                       | 0.0273                  | 0.0479      |
| 15  | SUMATERA BARAT   | (84) KAB. SAWAHLUNTO/SIJUNJUNG (116) | 0.0006                       | 0.0009         | 0.0008                  | 0.0023                              | 0.0022             | 0.0020                    | 0.0042                       | 0.0028                  | 0.0093      |
| 16  | R I A U          | (36) KAB. INDRAGIRI HILIR (31)       | 0.0019                       | 0.0027         | 0.0015                  | 0.0061                              | 0.0060             | 0.0088                    | 0.0148                       | 0.0140                  | 0.0349      |
| 17  | R I A U          | (5) KOTA BATAM (21)                  | 0.0034                       | 0.0032         | 0.0031                  | 0.0097                              | 0.0022             | 0.0020                    | 0.0042                       | 0.0273                  | 0.0412      |
| 18  | R I A U          | (55) KAB. BENGKALIS (63)             | 0.0019                       | 0.0027         | 0.0068                  | 0.0114                              | 0.0060             | 0.0020                    | 0.0080                       | 0.0028                  | 0.0222      |
| 19  | R I A U          | (74) KAB. KAMPAR (90)                | 0.0015                       | 0.0027         | 0.0015                  | 0.0057                              | 0.0060             | 0.0020                    | 0.0080                       | 0.0028                  | 0.0165      |
| 20  | R I A U          | (9) KOTA PEKAN BARU (39)             | 0.0034                       | 0.0032         | 0.0113                  | 0.0179                              | 0.0060             | 0.0014                    | 0.0074                       | 0.0066                  | 0.0319      |
| 21  | J A M B I        | (23) KAB. BATANGHARI (83)            | 0.0015                       | 0.0027         | 0.0031                  | 0.0073                              | 0.0060             | 0.0020                    | 0.0080                       | 0.0028                  | 0.0181      |
| 22  | J A M B I        | (35) KAB. KERINCI (84)               | 0.0025                       | 0.0027         | 0.0015                  | 0.0067                              | 0.0060             | 0.0020                    | 0.0080                       | 0.0028                  | 0.0175      |
| 23  | J A M B I        | (42) KAB. BUNGOTEBO (71)             | 0.0006                       | 0.0009         | 0.0015                  | 0.0030                              | 0.0060             | 0.0088                    | 0.0148                       | 0.0028                  | 0.0206      |
| 24  | SUMATERA SELATAN | (113) KAB. OGAN KOMERING ILIR (97)   | 0.0015                       | 0.0004         | 0.0015                  | 0.0034                              | 0.0029             | 0.0020                    | 0.0049                       | 0.0066                  | 0.0149      |
| 25  | SUMATERA SELATAN | (12) KOTA PALEMBANG (1)              | 0.0034                       | 0.0032         | 0.0113                  | 0.0179                              | 0.0029             | 0.0088                    | 0.0117                       | 0.0273                  | 0.0569      |
| 26  | SUMATERA SELATAN | (68) KAB. MUARA ENIM (36)            | 0.0015                       | 0.0027         | 0.0031                  | 0.0073                              | 0.0029             | 0.0088                    | 0.0117                       | 0.0140                  | 0.0330      |
| 27  | SUMATERA SELATAN | (70) KAB. MUSI BANYUASIN (20)        | 0.0006                       | 0.0009         | 0.0008                  | 0.0023                              | 0.0029             | 0.0088                    | 0.0117                       | 0.0273                  | 0.0413      |
| 28  | SUMATERA SELATAN | (88) KAB. MUSI RAWAS (45)            | 0.0019                       | 0.0009         | 0.0015                  | 0.0043                              | 0.0029             | 0.0088                    | 0.0117                       | 0.0140                  | 0.0300      |



| NO. | PROPINSI        | KABUPATEN/KOTA                    | TENAGA KERJA & PRODUKTIVITAS |                |                         |                                     |                   |                           |                              | TOTAL SCORE |                         |
|-----|-----------------|-----------------------------------|------------------------------|----------------|-------------------------|-------------------------------------|-------------------|---------------------------|------------------------------|-------------|-------------------------|
|     |                 |                                   | Ketersediaan Tenaga Kerja    |                |                         | Biaya Tenaga Kerja                  |                   |                           |                              |             |                         |
|     |                 |                                   | Usia Produktif<br>0.0099     | SLTP<br>0.0097 | Pencari Kerja<br>0.0235 | Sub Total Ketersediaan Tenaga Kerja | UMP/IHK<br>0.0144 | Upah Aktual/IHK<br>0.0163 | Sub Total Biaya Tenaga Kerja |             | Produktivitas<br>0.0525 |
| 29  | BANGKA BELITUNG | (102) KOTA PANGKAL PINANG (53)    | 0.0019                       | 0.0025         | 0.0031                  | 0.0075                              | 0.0029            | 0.0088                    | 0.0117                       | 0.0066      | 0.0258                  |
| 30  | BANGKA BELITUNG | (59) KAB. BANGKA (19)             | 0.0019                       | 0.0009         | 0.0008                  | 0.0036                              | 0.0029            | 0.0088                    | 0.0117                       | 0.0273      | 0.0426                  |
| 31  | BENGKULU        | (121) KAB. BENGKULU SELATAN (102) | 0.0015                       | 0.0009         | 0.0008                  | 0.0032                              | 0.0060            | 0.0020                    | 0.0080                       | 0.0028      | 0.0140                  |
| 32  | BENGKULU        | (91) KOTA BENGKULU (80)           | 0.0019                       | 0.0032         | 0.0031                  | 0.0082                              | 0.0060            | 0.0020                    | 0.0080                       | 0.0028      | 0.0190                  |
| 33  | LAMPUNG         | (122) KAB. LAMPUNG SELATAN (98)   | 0.0006                       | 0.0009         | 0.0015                  | 0.0030                              | 0.0029            | 0.0020                    | 0.0049                       | 0.0066      | 0.0145                  |
| 34  | LAMPUNG         | (125) KAB. LAMPUNG TIMUR (56)     | 0.0034                       | 0.0032         | 0.0113                  | 0.0179                              | 0.0029            | 0.0014                    | 0.0043                       | 0.0028      | 0.0250                  |
| 35  | LAMPUNG         | (37) KOTA BANDAR LAMPUNG (1)      | 0.0034                       | 0.0032         | 0.0113                  | 0.0179                              | 0.0029            | 0.0088                    | 0.0117                       | 0.0273      | 0.0569                  |
| 36  | LAMPUNG         | (43) KAB. LAMPUNG BARAT (103)     | 0.0006                       | 0.0009         | 0.0008                  | 0.0023                              | 0.0029            | 0.0020                    | 0.0049                       | 0.0066      | 0.0138                  |
| 37  | BANTEN          | (30) KAB. TANGERANG (22)          | 0.0019                       | 0.0025         | 0.0113                  | 0.0157                              | 0.0015            | 0.0088                    | 0.0103                       | 0.0140      | 0.0400                  |
| 38  | BANTEN          | (57) KAB. SERANG (18)             | 0.0006                       | 0.0027         | 0.0113                  | 0.0146                              | 0.0060            | 0.0088                    | 0.0148                       | 0.0140      | 0.0434                  |
| 39  | BANTEN          | (6) TA TANGERANG (5)              | 0.0034                       | 0.0032         | 0.0113                  | 0.0179                              | 0.0015            | 0.0020                    | 0.0035                       | 0.0273      | 0.0487                  |
| 40  | BANTEN          | (75) KAB. LEBAK (62)              | 0.0006                       | 0.0004         | 0.0068                  | 0.0078                              | 0.0060            | 0.0020                    | 0.0080                       | 0.0066      | 0.0224                  |
| 41  | JAWA BARAT      | (106) KAB. CIAMIS (69)            | 0.0025                       | 0.0009         | 0.0031                  | 0.0065                              | 0.0029            | 0.0088                    | 0.0117                       | 0.0028      | 0.0210                  |
| 42  | JAWA BARAT      | (107) KAB. SUKABUMI (104)         | 0.0019                       | 0.0004         | 0.0031                  | 0.0054                              | 0.0029            | 0.0020                    | 0.0049                       | 0.0028      | 0.0131                  |
| 43  | JAWA BARAT      | (111) KAB. KUNINGAN (85)          | 0.0025                       | 0.0004         | 0.0068                  | 0.0097                              | 0.0029            | 0.0020                    | 0.0049                       | 0.0028      | 0.0174                  |
| 44  | JAWA BARAT      | (114) KAB. GARUT (66)             | 0.0015                       | 0.0009         | 0.0113                  | 0.0137                              | 0.0029            | 0.0020                    | 0.0049                       | 0.0028      | 0.0214                  |
| 45  | JAWA BARAT      | (115) KAB. CIREBON (58)           | 0.0025                       | 0.0009         | 0.0068                  | 0.0102                              | 0.0029            | 0.0088                    | 0.0117                       | 0.0028      | 0.0247                  |
| 46  | JAWA BARAT      | (118) KAB. SUMEDANG (76)          | 0.0019                       | 0.0009         | 0.0031                  | 0.0059                              | 0.0022            | 0.0088                    | 0.0110                       | 0.0028      | 0.0197                  |
| 47  | JAWA BARAT      | (119) KAB. TASIKMALAYA (109)      | 0.0019                       | 0.0004         | 0.0031                  | 0.0054                              | 0.0018            | 0.0021                    | 0.0039                       | 0.0028      | 0.0121                  |
| 48  | JAWA BARAT      | (22) KOTA BEKASI (32)             | 0.0034                       | 0.0032         | 0.0113                  | 0.0179                              | 0.0015            | 0.0014                    | 0.0029                       | 0.0140      | 0.0348                  |
| 49  | JAWA BARAT      | (24) KOTA BOGOR (48)              | 0.0034                       | 0.0032         | 0.0113                  | 0.0179                              | 0.0015            | 0.0020                    | 0.0035                       | 0.0066      | 0.0280                  |
| 50  | JAWA BARAT      | (41) KOTA CIREBON (3)             | 0.0034                       | 0.0032         | 0.0031                  | 0.0097                              | 0.0060            | 0.0088                    | 0.0148                       | 0.0273      | 0.0518                  |
| 51  | JAWA BARAT      | (47) KAB. BOGOR (37)              | 0.0019                       | 0.0027         | 0.0113                  | 0.0159                              | 0.0015            | 0.0088                    | 0.0103                       | 0.0066      | 0.0328                  |
| 52  | JAWA BARAT      | (60) KOTA SUKABUMI (38)           | 0.0034                       | 0.0032         | 0.0113                  | 0.0179                              | 0.0029            | 0.0088                    | 0.0117                       | 0.0028      | 0.0324                  |
| 53  | JAWA BARAT      | (65) KAB. KARAWANG (34)           | 0.0034                       | 0.0027         | 0.0113                  | 0.0174                              | 0.0015            | 0.0088                    | 0.0103                       | 0.0066      | 0.0343                  |
| 54  | JAWA BARAT      | (7) KAB. BEKASI (13)              | 0.0019                       | 0.0027         | 0.0031                  | 0.0077                              | 0.0015            | 0.0088                    | 0.0103                       | 0.0273      | 0.0453                  |
| 55  | JAWA BARAT      | (73) KAB. INDRAMAYU (15)          | 0.0019                       | 0.0004         | 0.0031                  | 0.0054                              | 0.0029            | 0.0088                    | 0.0117                       | 0.0273      | 0.0444                  |
| 56  | JAWA TENGAH     | (1) KOTA SEMARANG (17)            | 0.0034                       | 0.0032         | 0.0113                  | 0.0179                              | 0.0029            | 0.0088                    | 0.0117                       | 0.0140      | 0.0436                  |
| 57  | JAWA TENGAH     | (10) KAB. KENDAL (57)             | 0.0019                       | 0.0009         | 0.0031                  | 0.0059                              | 0.0029            | 0.0020                    | 0.0049                       | 0.0140      | 0.0248                  |

| NO. | PROPINSI        | KABUPATEN/KOTA             | TENAGA KERJA & PRODUKTIVITAS |                |                         |                                     |                   |                           |                              | TOTAL SCORE |                         |
|-----|-----------------|----------------------------|------------------------------|----------------|-------------------------|-------------------------------------|-------------------|---------------------------|------------------------------|-------------|-------------------------|
|     |                 |                            | Ketersediaan Tenaga Kerja    |                |                         | Biaya Tenaga Kerja                  |                   |                           |                              |             |                         |
|     |                 |                            | Usia Produktif<br>0.0099     | SLTP<br>0.0097 | Pencari Kerja<br>0.0235 | Sub Total Ketersediaan Tenaga Kerja | UMP/IHK<br>0.0144 | Upah Aktual/IHK<br>0.0163 | Sub Total Biaya Tenaga Kerja |             | Produktivitas<br>0.0525 |
| 58  | JAWA TENGAH     | (11) KAB. PEMALANG (61)    | 0.0015                       | 0.0004         | 0.0113                  | 0.0132                              | 0.0060            | 0.0020                    | 0.0080                       | 0.0028      | 0.0240                  |
| 59  | JAWA TENGAH     | (14) KOTA PEKALONGAN (54)  | 0.0019                       | 0.0027         | 0.0031                  | 0.0077                              | 0.0060            | 0.0088                    | 0.0148                       | 0.0028      | 0.0253                  |
| 60  | JAWA TENGAH     | (19) KAB. PEKALONGAN (91)  | 0.0015                       | 0.0009         | 0.0031                  | 0.0055                              | 0.0060            | 0.0020                    | 0.0080                       | 0.0028      | 0.0163                  |
| 61  | JAWA TENGAH     | (27) KAB. MAGELANG (93)    | 0.0025                       | 0.0009         | 0.0015                  | 0.0049                              | 0.0060            | 0.0020                    | 0.0080                       | 0.0028      | 0.0157                  |
| 62  | JAWA TENGAH     | (28) KAB. TEGAL (75)       | 0.0019                       | 0.0004         | 0.0068                  | 0.0091                              | 0.0060            | 0.0020                    | 0.0080                       | 0.0028      | 0.0199                  |
| 63  | JAWA TENGAH     | (3) KOTA TEGAL (27)        | 0.0025                       | 0.0025         | 0.0113                  | 0.0163                              | 0.0060            | 0.0088                    | 0.0148                       | 0.0066      | 0.0377                  |
| 64  | JAWA TENGAH     | (50) KAB. SUKOHARJO (82)   | 0.0025                       | 0.0025         | 0.0068                  | 0.0118                              | 0.0018            | 0.0020                    | 0.0038                       | 0.0028      | 0.0184                  |
| 65  | D.I. YOGYAKARTA | (33) KOTA YOGYAKARTA (49)  | 0.0034                       | 0.0032         | 0.0068                  | 0.0134                              | 0.0060            | 0.0014                    | 0.0074                       | 0.0066      | 0.0274                  |
| 66  | JAWA TIMUR      | (112) KAB. BANGKALAN (81)  | 0.0025                       | 0.0004         | 0.0015                  | 0.0044                              | 0.0029            | 0.0088                    | 0.0117                       | 0.0028      | 0.0189                  |
| 67  | JAWA TIMUR      | (120) KAB. PAMEKASAN (115) | 0.0025                       | 0.0004         | 0.0015                  | 0.0044                              | 0.0018            | 0.0021                    | 0.0039                       | 0.0019      | 0.0102                  |
| 68  | JAWA TIMUR      | (15) KOTA MALANG (2)       | 0.0034                       | 0.0032         | 0.0113                  | 0.0179                              | 0.0022            | 0.0088                    | 0.0110                       | 0.0273      | 0.0562                  |
| 69  | JAWA TIMUR      | (17) KAB. SIDOARJO (40)    | 0.0034                       | 0.0032         | 0.0031                  | 0.0097                              | 0.0060            | 0.0088                    | 0.0148                       | 0.0066      | 0.0311                  |
| 70  | JAWA TIMUR      | (18) KOTA SURABAYA (3)     | 0.0034                       | 0.0032         | 0.0031                  | 0.0097                              | 0.0060            | 0.0088                    | 0.0148                       | 0.0273      | 0.0518                  |
| 71  | JAWA TIMUR      | (56) KAB. PASURUAN (86)    | 0.0025                       | 0.0009         | 0.0031                  | 0.0065                              | 0.0060            | 0.0020                    | 0.0080                       | 0.0028      | 0.0173                  |
| 72  | JAWA TIMUR      | (72.) KAB. MOJOKERTO (52)  | 0.0025                       | 0.0027         | 0.0031                  | 0.0083                              | 0.0060            | 0.0088                    | 0.0148                       | 0.0028      | 0.0259                  |
| 73  | JAWA TIMUR      | (8) KOTA KEDIRI (4)        | 0.0034                       | 0.0025         | 0.0068                  | 0.0127                              | 0.0029            | 0.0088                    | 0.0117                       | 0.0273      | 0.0517                  |
| 74  | JAWA TIMUR      | (82) KAB. KEDIRI (100)     | 0.0025                       | 0.0009         | 0.0031                  | 0.0065                              | 0.0029            | 0.0021                    | 0.0050                       | 0.0028      | 0.0143                  |
| 75  | JAWA TIMUR      | (85) KOTA MOJOKERTO (41)   | 0.0034                       | 0.0032         | 0.0068                  | 0.0134                              | 0.0060            | 0.0088                    | 0.0148                       | 0.0028      | 0.0310                  |
| 76  | JAWA TIMUR      | (87) KAB. BLITAR (107)     | 0.0025                       | 0.0009         | 0.0015                  | 0.0049                              | 0.0029            | 0.0020                    | 0.0049                       | 0.0028      | 0.0126                  |
| 77  | JAWA TIMUR      | (92) KOTA PROBOLINGGO (28) | 0.0025                       | 0.0025         | 0.0031                  | 0.0081                              | 0.0060            | 0.0088                    | 0.0148                       | 0.0140      | 0.0369                  |
| 78  | JAWA TIMUR      | (96) KAB. MAGETAN (96)     | 0.0025                       | 0.0027         | 0.0031                  | 0.0083                              | 0.0018            | 0.0021                    | 0.0039                       | 0.0028      | 0.0150                  |
| 79  | JAWA TIMUR      | (99) KAB. BANYUWANGI (79)  | 0.0034                       | 0.0009         | 0.0015                  | 0.0058                              | 0.0018            | 0.0088                    | 0.0106                       | 0.0028      | 0.0192                  |
| 80  | BALI            | (16) KAB. GIANYAR (60)     | 0.0034                       | 0.0025         | 0.0008                  | 0.0067                              | 0.0060            | 0.0088                    | 0.0148                       | 0.0028      | 0.0243                  |
| 81  | BALI            | (20) KAB. BADUNG (81)      | 0.0034                       | 0.0032         | 0.0015                  | 0.0081                              | 0.0060            | 0.0020                    | 0.0080                       | 0.0028      | 0.0189                  |
| 82  | BALI            | (25) KOTA DENPASAR (64)    | 0.0034                       | 0.0032         | 0.0015                  | 0.0081                              | 0.0060            | 0.0014                    | 0.0074                       | 0.0066      | 0.0221                  |
| 83  | BALI            | (52) KAB. TABANAN (55)     | 0.0034                       | 0.0027         | 0.0015                  | 0.0076                              | 0.0060            | 0.0088                    | 0.0148                       | 0.0028      | 0.0252                  |
| 84  | BALI            | (53) KAB. JEMBRANA (51)    | 0.0034                       | 0.0027         | 0.0031                  | 0.0092                              | 0.0060            | 0.0088                    | 0.0148                       | 0.0028      | 0.0268                  |
| 85  | BALI            | (62) KAB. BULELENG (67)    | 0.0025                       | 0.0027         | 0.0015                  | 0.0067                              | 0.0060            | 0.0020                    | 0.0080                       | 0.0066      | 0.0213                  |
| 86  | BALI            | (71) KAB. BANGLI (65)      | 0.0025                       | 0.0009         | 0.0008                  | 0.0042                              | 0.0060            | 0.0088                    | 0.0148                       | 0.0028      | 0.0218                  |

| NO. | PROPINSI           | KABUPATEN/KOTA                      | TENAGA KERJA & PRODUKTIVITAS |                |                         |                                     |                   |                           |                              | TOTAL SCORE |                         |
|-----|--------------------|-------------------------------------|------------------------------|----------------|-------------------------|-------------------------------------|-------------------|---------------------------|------------------------------|-------------|-------------------------|
|     |                    |                                     | Ketersediaan Tenaga Kerja    |                |                         | Biaya Tenaga Kerja                  |                   |                           |                              |             |                         |
|     |                    |                                     | Usia Produktif<br>0.0099     | SLTP<br>0.0097 | Pencari Kerja<br>0.0235 | Sub Total Ketersediaan Tenaga Kerja | UMP/IHK<br>0.0144 | Upah Aktual/IHK<br>0.0163 | Sub Total Biaya Tenaga Kerja |             | Produktivitas<br>0.0525 |
| 87  | KALIMANTAN BARAT   | (103) KAB. SAMBAS (78)              | 0.0015                       | 0.0009         | 0.0031                  | 0.0055                              | 0.0022            | 0.0088                    | 0.0110                       | 0.0028      | 0.0193                  |
| 88  | KALIMANTAN BARAT   | (104) KAB. KAPUAS HULU (68)         | 0.0025                       | 0.0027         | 0.0015                  | 0.0067                              | 0.0029            | 0.0088                    | 0.0117                       | 0.0028      | 0.0212                  |
| 89  | KALIMANTAN BARAT   | (110) KAB. KETAPANG (95)            | 0.0015                       | 0.0009         | 0.0015                  | 0.0039                              | 0.0029            | 0.0020                    | 0.0049                       | 0.0066      | 0.0154                  |
| 90  | KALIMANTAN BARAT   | (74) KAB. SANGGAU (19)              | 0.0019                       | 0.0009         | 0.0008                  | 0.0036                              | 0.0029            | 0.0088                    | 0.0117                       | 0.0273      | 0.0426                  |
| 91  | KALIMANTAN BARAT   | (86) KAB. PONTIANAK (33)            | 0.0006                       | 0.0009         | 0.0015                  | 0.0030                              | 0.0022            | 0.0020                    | 0.0042                       | 0.0273      | 0.0345                  |
| 92  | KALIMANTAN TENGAH  | (67) KAB. BARITO UTARA (74)         | 0.0019                       | 0.0027         | 0.0008                  | 0.0054                              | 0.0060            | 0.0020                    | 0.0080                       | 0.0066      | 0.0200                  |
| 93  | KALIMANTAN TENGAH  | (74) KAB. BARITO SELATAN (51)       | 0.0019                       | 0.0027         | 0.0008                  | 0.0054                              | 0.0060            | 0.0088                    | 0.0148                       | 0.0066      | 0.0268                  |
| 94  | KALIMANTAN TENGAH  | (95) KAB. KAPUAS (70)               | 0.0019                       | 0.0027         | 0.0015                  | 0.0061                              | 0.0060            | 0.0020                    | 0.0080                       | 0.0066      | 0.0207                  |
| 95  | KALIMANTAN SELATAN | (108) KAB. HULU SUNGAI SELATAN (80) | 0.0019                       | 0.0009         | 0.0031                  | 0.0059                              | 0.0015            | 0.0088                    | 0.0103                       | 0.0028      | 0.0190                  |
| 96  | KALIMANTAN SELATAN | (116) KAB. TAPIN (114)              | 0.0025                       | 0.0004         | 0.0015                  | 0.0044                              | 0.0015            | 0.0020                    | 0.0035                       | 0.0028      | 0.0107                  |
| 97  | KALIMANTAN SELATAN | (69) KAB. TABALONG (110)            | 0.0025                       | 0.0027         | 0.0008                  | 0.0060                              | 0.0015            | 0.0014                    | 0.0029                       | 0.0028      | 0.0117                  |
| 98  | KALIMANTAN SELATAN | (78) KAB. HULU SUNGAI TENGAH (92)   | 0.0019                       | 0.0004         | 0.0008                  | 0.0031                              | 0.0015            | 0.0088                    | 0.0103                       | 0.0028      | 0.0162                  |
| 99  | KALIMANTAN SELATAN | (81) KAB. HULU SUNGAI UTARA (72)    | 0.0019                       | 0.0009         | 0.0008                  | 0.0036                              | 0.0015            | 0.0088                    | 0.0103                       | 0.0066      | 0.0205                  |
| 100 | KALIMANTAN SELATAN | (83) KAB. TANAH LAUT (47)           | 0.0019                       | 0.0009         | 0.0015                  | 0.0043                              | 0.0015            | 0.0088                    | 0.0103                       | 0.0140      | 0.0286                  |
| 101 | KALIMANTAN TIMUR   | (2) KOTA BALIKPAPAN (6)             | 0.0034                       | 0.0032         | 0.0113                  | 0.0179                              | 0.0015            | 0.0014                    | 0.0029                       | 0.0273      | 0.0481                  |
| 102 | KALIMANTAN TIMUR   | (21) KAB. BERAU (12)                | 0.0025                       | 0.0027         | 0.0031                  | 0.0083                              | 0.0015            | 0.0088                    | 0.0103                       | 0.0273      | 0.0459                  |
| 103 | KALIMANTAN TIMUR   | (22) KAB. KUTAI (87)                | 0.0019                       | 0.0027         | 0.0031                  | 0.0077                              | 0.0015            | 0.0014                    | 0.0029                       | 0.0066      | 0.0172                  |
| 104 | KALIMANTAN TIMUR   | (39) KOTA SAMARINDA (23)            | 0.0034                       | 0.0032         | 0.0031                  | 0.0097                              | 0.0015            | 0.0014                    | 0.0029                       | 0.0273      | 0.0399                  |
| 105 | KALIMANTAN TIMUR   | (64) KAB. PASIR (99)                | 0.0019                       | 0.0009         | 0.0015                  | 0.0043                              | 0.0015            | 0.0020                    | 0.0035                       | 0.0066      | 0.0144                  |
| 106 | SULAWESI UTARA     | (39) KOTA MANADO (10)               | 0.0034                       | 0.0032         | 0.0113                  | 0.0179                              | 0.0060            | 0.0088                    | 0.0148                       | 0.0140      | 0.0467                  |
| 107 | SULAWESI UTARA     | (44) KOTA BITUNG (30)               | 0.0034                       | 0.0032         | 0.0068                  | 0.0134                              | 0.0060            | 0.0020                    | 0.0080                       | 0.0140      | 0.0354                  |
| 108 | SULAWESI UTARA     | (45) KAB. MINAHASA (43)             | 0.0034                       | 0.0025         | 0.0031                  | 0.0090                              | 0.0060            | 0.0088                    | 0.0148                       | 0.0066      | 0.0304                  |
| 109 | SULAWESI UTARA     | (76) KAB. SANGIHE TALAUD (88)       | 0.0019                       | 0.0027         | 0.0015                  | 0.0061                              | 0.0060            | 0.0021                    | 0.0081                       | 0.0028      | 0.0170                  |
| 110 | GORONTALO          | (101) KAB. GORONTALO (89)           | 0.0019                       | 0.0009         | 0.0031                  | 0.0059                              | 0.0060            | 0.0020                    | 0.0080                       | 0.0028      | 0.0167                  |
| 111 | GORONTALO          | (46) KOTA GORONTALO (50)            | 0.0025                       | 0.0025         | 0.0113                  | 0.0163                              | 0.0060            | 0.0020                    | 0.0080                       | 0.0028      | 0.0271                  |
| 112 | SULAWESI TENGAH    | (100) KAB. POSO (92)                | 0.0015                       | 0.0027         | 0.0015                  | 0.0057                              | 0.0018            | 0.0021                    | 0.0039                       | 0.0066      | 0.0162                  |
| 113 | SULAWESI TENGAH    | (28) KAB. BANGGAI (77)              | 0.0019                       | 0.0027         | 0.0015                  | 0.0061                              | 0.0018            | 0.0088                    | 0.0106                       | 0.0028      | 0.0195                  |
| 114 | SULAWESI TENGAH    | (39) KAB. TOLI TOLI (99)            | 0.0019                       | 0.0027         | 0.0031                  | 0.0077                              | 0.0018            | 0.0021                    | 0.0039                       | 0.0028      | 0.0144                  |
| 115 | SULAWESI TENGAH    | (40) KAB. DONGGALA (106)            | 0.0006                       | 0.0009         | 0.0008                  | 0.0023                              | 0.0018            | 0.0020                    | 0.0038                       | 0.0066      | 0.0127                  |

| NO. | PROPINSI            | KABUPATEN/KOTA                       | TENAGA KERJA & PRODUKTIVITAS |                |                         |                                     |                   |                           |                              | TOTAL SCORE |                         |
|-----|---------------------|--------------------------------------|------------------------------|----------------|-------------------------|-------------------------------------|-------------------|---------------------------|------------------------------|-------------|-------------------------|
|     |                     |                                      | Ketersediaan Tenaga Kerja    |                |                         | Biaya Tenaga Kerja                  |                   |                           |                              |             |                         |
|     |                     |                                      | Usia Produktif<br>0.0099     | SLTP<br>0.0097 | Pencari Kerja<br>0.0235 | Sub Total Ketersediaan Tenaga Kerja | UMP/IHK<br>0.0144 | Upah Aktual/IHK<br>0.0163 | Sub Total Biaya Tenaga Kerja |             | Produktivitas<br>0.0525 |
| 116 | SULAWESI TENGAH     | (51) KAB. MOROWALI (111)             | 0.0006                       | 0.0009         | 0.0015                  | 0.0030                              | 0.0018            | 0.0000                    | 0.0018                       | 0.0066      | 0.0114                  |
| 117 | SULAWESI TENGGARA   | (48) KAB. KOLAKA (14)                | 0.0015                       | 0.0027         | 0.0015                  | 0.0057                              | 0.0029            | 0.0088                    | 0.0117                       | 0.0273      | 0.0447                  |
| 118 | SULAWESI TENGGARA   | (79) KAB. BUTON (113)                | 0.0006                       | 0.0027         | 0.0031                  | 0.0064                              | 0.0018            | 0.0000                    | 0.0018                       | 0.0028      | 0.0110                  |
| 119 | SULAWESI SELATAN    | (25) KOTA PARE-PARE (46)             | 0.0019                       | 0.0032         | 0.0068                  | 0.0119                              | 0.0060            | 0.0088                    | 0.0148                       | 0.0028      | 0.0295                  |
| 120 | SULAWESI SELATAN    | (31) KAB. PANGKAJENE & KEPULAUAN (4) | 0.0019                       | 0.0009         | 0.0068                  | 0.0096                              | 0.0060            | 0.0088                    | 0.0148                       | 0.0273      | 0.0517                  |
| 121 | SULAWESI SELATAN    | (63) KAB. PINRANG (73)               | 0.0015                       | 0.0027         | 0.0015                  | 0.0057                              | 0.0060            | 0.0020                    | 0.0080                       | 0.0066      | 0.0203                  |
| 122 | SULAWESI SELATAN    | (93) KAB. TANA TORAJA (94)           | 0.0006                       | 0.0027         | 0.0015                  | 0.0048                              | 0.0060            | 0.0020                    | 0.0080                       | 0.0028      | 0.0156                  |
| 123 | SULAWESI SELATAN    | (94) KAB. MAJENE (94)                | 0.0006                       | 0.0027         | 0.0015                  | 0.0048                              | 0.0060            | 0.0020                    | 0.0080                       | 0.0028      | 0.0156                  |
| 124 | SULAWESI SELATAN    | (98) KAB. LUWU (105)                 | 0.0015                       | 0.0027         | 0.0015                  | 0.0057                              | 0.0029            | 0.0014                    | 0.0043                       | 0.0028      | 0.0128                  |
| 125 | NUSA TENGGARA BARAT | (124) KAB. LOMBOK BARAT (112)        | 0.0015                       | 0.0004         | 0.0015                  | 0.0034                              | 0.0029            | 0.0021                    | 0.0050                       | 0.0028      | 0.0112                  |
| 126 | NUSA TENGGARA BARAT | (126) KAB. BIMA (101)                | 0.0006                       | 0.0027         | 0.0031                  | 0.0064                              | 0.0029            | 0.0020                    | 0.0049                       | 0.0028      | 0.0141                  |
| 127 | NUSA TENGGARA BARAT | (66) KOTA MATARAM (44)               | 0.0025                       | 0.0025         | 0.0068                  | 0.0118                              | 0.0029            | 0.0088                    | 0.0117                       | 0.0066      | 0.0301                  |
| 128 | NUSA TENGGARA TIMUR | (117) KAB. ENDE (108)                | 0.0006                       | 0.0004         | 0.0015                  | 0.0025                              | 0.0060            | 0.0020                    | 0.0080                       | 0.0019      | 0.0124                  |
| 129 | NUSA TENGGARA TIMUR | (120) KAB. FLORES TIMUR (107)        | 0.0006                       | 0.0004         | 0.0008                  | 0.0018                              | 0.0060            | 0.0020                    | 0.0080                       | 0.0028      | 0.0126                  |
| 130 | NUSA TENGGARA TIMUR | (32) KOTA KUPANG (29)                | 0.0034                       | 0.0032         | 0.0113                  | 0.0179                              | 0.0060            | 0.0088                    | 0.0148                       | 0.0028      | 0.0355                  |
| 131 | NUSA TENGGARA TIMUR | (72) KAB. TIMOR TENGAH UTARA (110)   | 0.0006                       | 0.0004         | 0.0008                  | 0.0018                              | 0.0060            | 0.0020                    | 0.0080                       | 0.0019      | 0.0117                  |
| 132 | NUSA TENGGARA TIMUR | (97) KAB. TIMOR TENGAH SELATAN (107) | 0.0006                       | 0.0004         | 0.0008                  | 0.0018                              | 0.0060            | 0.0020                    | 0.0080                       | 0.0028      | 0.0126                  |
| 133 | PAPUA               | (58) KAB. FAKFAK (26)                | 0.0015                       | 0.0027         | 0.0031                  | 0.0073                              | 0.0022            | 0.0014                    | 0.0036                       | 0.0273      | 0.0382                  |
| 134 | PAPUA               | (80) KAB. MANOKWARI (71)             | 0.0006                       | 0.0009         | 0.0015                  | 0.0030                              | 0.0022            | 0.0088                    | 0.0110                       | 0.0066      | 0.0206                  |

Lampiran 4.5.5. Hasil Pembobotan Intensitas Indikator-Indikator Faktor Infrastruktur Fisik dengan Metode AHP

| NO. | PROPINSI         | KABUPATEN/KOTA                      | INFRASTRUKTUR FISIK              |                          |                           |                  |                   |                                      |                              |                          |                           |                  |                   |                                  | TOTAL SCORE<br>0.1272 |
|-----|------------------|-------------------------------------|----------------------------------|--------------------------|---------------------------|------------------|-------------------|--------------------------------------|------------------------------|--------------------------|---------------------------|------------------|-------------------|----------------------------------|-----------------------|
|     |                  |                                     | Ketersediaan Infrastruktur Fisik |                          |                           |                  |                   |                                      | Kualitas Infrastruktur Fisik |                          |                           |                  |                   |                                  |                       |
|     |                  |                                     | Jalan<br>0.0138                  | Pelabuhan Laut<br>0.0141 | Pelabuhan Udara<br>0.0058 | Telepon<br>0.016 | Listrik<br>0.0175 | Sub Total Ketersediaan Infrastruktur | Jalan<br>0.0095              | Pelabuhan Laut<br>0.0089 | Pelabuhan Udara<br>0.0073 | Telepon<br>0.204 | Listrik<br>0.0139 | Sub Total Kualitas Infrastruktur |                       |
| 1   | SUMATERA UTARA   | (105) KAB. DELI SERDANG (66)        | 0.0018                           | 0.0038                   | 0.0017                    | 0.0031           | 0.0007            | 0.0111                               | 0.0018                       | 0.0014                   | 0.0015                    | 0.0033           | 0.0008            | 0.0088                           | 0.0199                |
| 2   | SUMATERA UTARA   | (109) KAB. LANGKAT (75)             | 0.0018                           | 0.0033                   | 0.0017                    | 0.0031           | 0.0007            | 0.0106                               | 0.0006                       | 0.0014                   | 0.0015                    | 0.0033           | 0.0008            | 0.0076                           | 0.0182                |
| 3   | SUMATERA UTARA   | (13) KOTA SIBOLGA (26)              | 0.0066                           | 0.0033                   | 0.0006                    | 0.0031           | 0.0011            | 0.0147                               | 0.0035                       | 0.0035                   | 0.0007                    | 0.0033           | 0.0052            | 0.0162                           | 0.0309                |
| 4   | SUMATERA UTARA   | (29) KAB. ASAHAN (41)               | 0.0040                           | 0.0033                   | 0.0017                    | 0.0031           | 0.0011            | 0.0132                               | 0.0003                       | 0.0031                   | 0.0015                    | 0.0033           | 0.0052            | 0.0134                           | 0.0266                |
| 5   | SUMATERA UTARA   | (4) KAB. DAIRI (23)                 | 0.0066                           | 0.0033                   | 0.0017                    | 0.0031           | 0.0011            | 0.0158                               | 0.0006                       | 0.0014                   | 0.0015                    | 0.0074           | 0.0052            | 0.0161                           | 0.0319                |
| 6   | SUMATERA UTARA   | (49) KOTA PEMATANG SIANTAR (41)     | 0.0066                           | 0.0033                   | 0.0017                    | 0.0031           | 0.0007            | 0.0154                               | 0.0035                       | 0.0014                   | 0.0022                    | 0.0033           | 0.0008            | 0.0112                           | 0.0266                |
| 7   | SUMATERA UTARA   | (54) KOTA MEDAN (18)                | 0.0066                           | 0.0051                   | 0.0017                    | 0.0071           | 0.0007            | 0.0212                               | 0.0035                       | 0.0035                   | 0.0026                    | 0.0033           | 0.0008            | 0.0137                           | 0.0349                |
| 8   | SUMATERA UTARA   | (61) KOTA TANJUNG BALAI (32)        | 0.0066                           | 0.0033                   | 0.0017                    | 0.0031           | 0.0011            | 0.0158                               | 0.0003                       | 0.0014                   | 0.0015                    | 0.0074           | 0.0022            | 0.0128                           | 0.0286                |
| 9   | SUMATERA UTARA   | (77) KOTA TEBING TINGGI (50)        | 0.0066                           | 0.0033                   | 0.0017                    | 0.0031           | 0.0011            | 0.0158                               | 0.0018                       | 0.0014                   | 0.0015                    | 0.0033           | 0.0008            | 0.0088                           | 0.0246                |
| 10  | SUMATERA UTARA   | (89) KAB. SIMALUNGUN (61)           | 0.0040                           | 0.0033                   | 0.0017                    | 0.0031           | 0.0011            | 0.0132                               | 0.0018                       | 0.0014                   | 0.0015                    | 0.0033           | 0.0008            | 0.0088                           | 0.0220                |
| 11  | SUMATERA UTARA   | (90) KOTA BINJAI (54)               | 0.0066                           | 0.0033                   | 0.0017                    | 0.0031           | 0.0007            | 0.0154                               | 0.0018                       | 0.0014                   | 0.0015                    | 0.0033           | 0.0008            | 0.0088                           | 0.0242                |
| 12  | SUMATERA BARAT   | (123) KAB. PESISIR SELATAN (88)     | 0.0009                           | 0.0033                   | 0.0017                    | 0.0010           | 0.0007            | 0.0076                               | 0.0018                       | 0.0006                   | 0.0007                    | 0.0016           | 0.0008            | 0.0055                           | 0.0131                |
| 13  | SUMATERA BARAT   | (2) KOTA SAWAH LUNTO (26)           | 0.0066                           | 0.0033                   | 0.0017                    | 0.0005           | 0.0011            | 0.0132                               | 0.0035                       | 0.0031                   | 0.0026                    | 0.0033           | 0.0052            | 0.0177                           | 0.0309                |
| 14  | SUMATERA BARAT   | (34) KOTA PADANG (12)               | 0.0040                           | 0.0038                   | 0.0017                    | 0.0044           | 0.0011            | 0.0150                               | 0.0035                       | 0.0031                   | 0.0026                    | 0.0074           | 0.0052            | 0.0218                           | 0.0368                |
| 15  | SUMATERA BARAT   | (84) KAB. SAWAHLUNTO/SIJUNJUNG (56) | 0.0009                           | 0.0033                   | 0.0017                    | 0.0044           | 0.0011            | 0.0114                               | 0.0018                       | 0.0031                   | 0.0022                    | 0.0033           | 0.0022            | 0.0126                           | 0.0240                |
| 16  | R I A U          | (36) KAB. INDRAGIRI HILIR (72)      | 0.0009                           | 0.0033                   | 0.0006                    | 0.0031           | 0.0007            | 0.0086                               | 0.0018                       | 0.0014                   | 0.0015                    | 0.0033           | 0.0022            | 0.0102                           | 0.0188                |
| 17  | R I A U          | (5) KOTA BATAM (1)                  | 0.0066                           | 0.0038                   | 0.0017                    | 0.0071           | 0.0057            | 0.0249                               | 0.0035                       | 0.0031                   | 0.0026                    | 0.0074           | 0.0052            | 0.0218                           | 0.0467                |
| 18  | R I A U          | (55) KAB. BENGKALIS (64)            | 0.0018                           | 0.0051                   | 0.0017                    | 0.0031           | 0.0007            | 0.0124                               | 0.0003                       | 0.0031                   | 0.0015                    | 0.0016           | 0.0022            | 0.0087                           | 0.0211                |
| 19  | R I A U          | (74) KAB. KAMPAR (67)               | 0.0018                           | 0.0033                   | 0.0006                    | 0.0031           | 0.0007            | 0.0095                               | 0.0018                       | 0.0014                   | 0.0015                    | 0.0033           | 0.0022            | 0.0102                           | 0.0197                |
| 20  | R I A U          | (9) KOTA PEKAN BARU (24)            | 0.0040                           | 0.0038                   | 0.0017                    | 0.0031           | 0.0007            | 0.0133                               | 0.0018                       | 0.0014                   | 0.0026                    | 0.0074           | 0.0052            | 0.0184                           | 0.0317                |
| 21  | J A M B I        | (23) KAB. BATANGHARI (28)           | 0.0009                           | 0.0033                   | 0.0017                    | 0.0031           | 0.0007            | 0.0097                               | 0.0018                       | 0.0035                   | 0.0022                    | 0.0074           | 0.0052            | 0.0201                           | 0.0298                |
| 22  | J A M B I        | (35) KAB. KERINCI (49)              | 0.0009                           | 0.0033                   | 0.0017                    | 0.0031           | 0.0007            | 0.0097                               | 0.0035                       | 0.0006                   | 0.0015                    | 0.0074           | 0.0022            | 0.0152                           | 0.0249                |
| 23  | J A M B I        | (42) KAB. BUNGOTEBE (47)            | 0.0005                           | 0.0033                   | 0.0017                    | 0.0031           | 0.0007            | 0.0093                               | 0.0035                       | 0.0014                   | 0.0015                    | 0.0074           | 0.0022            | 0.0160                           | 0.0253                |
| 24  | SUMATERA SELATAN | (113) KAB. OGAN KOMERING ILIR (35)  | 0.0040                           | 0.0033                   | 0.0017                    | 0.0044           | 0.0057            | 0.0191                               | 0.0006                       | 0.0014                   | 0.0015                    | 0.0033           | 0.0022            | 0.0090                           | 0.0281                |
| 25  | SUMATERA SELATAN | (12) KOTA PALEMBANG (21)            | 0.0066                           | 0.0051                   | 0.0017                    | 0.0071           | 0.0011            | 0.0216                               | 0.0035                       | 0.0031                   | 0.0026                    | 0.0016           | 0.0008            | 0.0116                           | 0.0332                |
| 26  | SUMATERA SELATAN | (68) KAB. MUARA ENIM (40)           | 0.0018                           | 0.0033                   | 0.0017                    | 0.0044           | 0.0029            | 0.0141                               | 0.0018                       | 0.0031                   | 0.0022                    | 0.0033           | 0.0022            | 0.0126                           | 0.0267                |
| 27  | SUMATERA SELATAN | (70) KAB. MUSI BANYUASIN (35)       | 0.0066                           | 0.0033                   | 0.0017                    | 0.0071           | 0.0007            | 0.0194                               | 0.0003                       | 0.0014                   | 0.0015                    | 0.0033           | 0.0022            | 0.0087                           | 0.0281                |



| NO. | PROPINSI         | KABUPATEN/KOTA                   | INFRASTRUKTUR FISIK              |                          |                           |                  |                   |                                      |                 |                          |                           |                  |                   | TOTAL SCORE<br>0.1272 |                                  |
|-----|------------------|----------------------------------|----------------------------------|--------------------------|---------------------------|------------------|-------------------|--------------------------------------|-----------------|--------------------------|---------------------------|------------------|-------------------|-----------------------|----------------------------------|
|     |                  |                                  | Ketersediaan Infrastruktur Fisik |                          |                           |                  |                   | Kualitas Infrastruktur Fisik         |                 |                          |                           |                  |                   |                       |                                  |
|     |                  |                                  | Jalan<br>0.0138                  | Pelabuhan Laut<br>0.0141 | Pelabuhan Udara<br>0.0058 | Telepon<br>0.016 | Listrik<br>0.0175 | Sub Total Ketersediaan Infrastruktur | Jalan<br>0.0095 | Pelabuhan Laut<br>0.0089 | Pelabuhan Udara<br>0.0073 | Telepon<br>0.204 | Listrik<br>0.0139 |                       | Sub Total Kualitas Infrastruktur |
| 28  | SUMATERA SELATAN | (88) KAB. MUSI RAWAS (55)        | 0.0066                           | 0.0033                   | 0.0017                    | 0.0031           | 0.0007            | 0.0154                               | 0.0003          | 0.0014                   | 0.0015                    | 0.0033           | 0.0022            | 0.0087                | 0.0241                           |
| 29  | BANGKA BELITUNG  | (102) KOTA PANGKAL PINANG (69)   | 0.0005                           | 0.0033                   | 0.0017                    | 0.0031           | 0.0011            | 0.0097                               | 0.0018          | 0.0014                   | 0.0022                    | 0.0033           | 0.0008            | 0.0095                | 0.0192                           |
| 30  | BANGKA BELITUNG  | (59) KAB. BANGKA (69)            | 0.0005                           | 0.0033                   | 0.0017                    | 0.0031           | 0.0011            | 0.0097                               | 0.0018          | 0.0014                   | 0.0022                    | 0.0033           | 0.0008            | 0.0095                | 0.0192                           |
| 31  | BENGKULU         | (121) KAB. BENGKULU SELATAN (71) | 0.0018                           | 0.0033                   | 0.0006                    | 0.0031           | 0.0007            | 0.0095                               | 0.0018          | 0.0006                   | 0.0015                    | 0.0033           | 0.0022            | 0.0094                | 0.0189                           |
| 32  | BENGKULU         | (91) KOTA BENGKULU (58)          | 0.0066                           | 0.0033                   | 0.0006                    | 0.0031           | 0.0007            | 0.0143                               | 0.0018          | 0.0006                   | 0.0015                    | 0.0033           | 0.0022            | 0.0094                | 0.0237                           |
| 33  | LAMPUNG          | (122) KAB. LAMPUNG SELATAN (77)  | 0.0040                           | 0.0033                   | 0.0017                    | 0.0010           | 0.0011            | 0.0111                               | 0.0018          | 0.0014                   | 0.0015                    | 0.0016           | 0.0004            | 0.0067                | 0.0178                           |
| 34  | LAMPUNG          | (125) KAB. LAMPUNG TIMUR (66)    | 0.0040                           | 0.0033                   | 0.0017                    | 0.0031           | 0.0011            | 0.0132                               | 0.0018          | 0.0014                   | 0.0015                    | 0.0016           | 0.0004            | 0.0067                | 0.0199                           |
| 35  | LAMPUNG          | (37) KOTA BANDAR LAMPUNG (29)    | 0.0040                           | 0.0033                   | 0.0017                    | 0.0044           | 0.0011            | 0.0145                               | 0.0018          | 0.0031                   | 0.0022                    | 0.0074           | 0.0004            | 0.0149                | 0.0294                           |
| 36  | LAMPUNG          | (43) KAB. LAMPUNG BARAT (74)     | 0.0018                           | 0.0033                   | 0.0017                    | 0.0010           | 0.0011            | 0.0089                               | 0.0018          | 0.0006                   | 0.0015                    | 0.0033           | 0.0022            | 0.0094                | 0.0183                           |
| 37  | BANTEN           | (30) KAB. TANGERANG (3)          | 0.0066                           | 0.0038                   | 0.0017                    | 0.0071           | 0.0029            | 0.0221                               | 0.0035          | 0.0035                   | 0.0026                    | 0.0074           | 0.0052            | 0.0222                | 0.0443                           |
| 38  | BANTEN           | (57) KAB. SERANG (16)            | 0.0040                           | 0.0038                   | 0.0017                    | 0.0071           | 0.0011            | 0.0177                               | 0.0018          | 0.0014                   | 0.0022                    | 0.0074           | 0.0052            | 0.0180                | 0.0357                           |
| 39  | BANTEN           | (6) KOTA TANGERANG (3)           | 0.0066                           | 0.0038                   | 0.0017                    | 0.0071           | 0.0029            | 0.0221                               | 0.0035          | 0.0035                   | 0.0026                    | 0.0074           | 0.0052            | 0.0222                | 0.0443                           |
| 40  | BANTEN           | (75) KAB. LEBAK (59)             | 0.0018                           | 0.0033                   | 0.0017                    | 0.0044           | 0.0011            | 0.0123                               | 0.0018          | 0.0014                   | 0.0022                    | 0.0033           | 0.0022            | 0.0109                | 0.0232                           |
| 41  | JAWA BARAT       | (106) KAB. CIAMIS (30)           | 0.0040                           | 0.0033                   | 0.0017                    | 0.0044           | 0.0057            | 0.0191                               | 0.0018          | 0.0014                   | 0.0015                    | 0.0033           | 0.0022            | 0.0102                | 0.0293                           |
| 42  | JAWA BARAT       | (107) KAB. SUKABUMI (42)         | 0.0040                           | 0.0033                   | 0.0017                    | 0.0044           | 0.0029            | 0.0163                               | 0.0018          | 0.0014                   | 0.0015                    | 0.0033           | 0.0022            | 0.0102                | 0.0265                           |
| 43  | JAWA BARAT       | (111) KAB. KUNINGAN (44)         | 0.0040                           | 0.0033                   | 0.0017                    | 0.0044           | 0.0057            | 0.0191                               | 0.0018          | 0.0014                   | 0.0015                    | 0.0016           | 0.0008            | 0.0071                | 0.0262                           |
| 44  | JAWA BARAT       | (114) KAB. GARUT (36)            | 0.0040                           | 0.0033                   | 0.0017                    | 0.0044           | 0.0057            | 0.0191                               | 0.0018          | 0.0014                   | 0.0015                    | 0.0033           | 0.0008            | 0.0088                | 0.0279                           |
| 45  | JAWA BARAT       | (115) KAB. CIREBON (33)          | 0.0040                           | 0.0038                   | 0.0017                    | 0.0044           | 0.0057            | 0.0196                               | 0.0018          | 0.0014                   | 0.0015                    | 0.0033           | 0.0008            | 0.0088                | 0.0284                           |
| 46  | JAWA BARAT       | (118) KAB. SUMEDANG (36)         | 0.0040                           | 0.0033                   | 0.0017                    | 0.0044           | 0.0057            | 0.0191                               | 0.0018          | 0.0014                   | 0.0015                    | 0.0033           | 0.0008            | 0.0088                | 0.0279                           |
| 47  | JAWA BARAT       | (119) KAB. TASIKMALAYA (30)      | 0.0040                           | 0.0033                   | 0.0017                    | 0.0044           | 0.0057            | 0.0191                               | 0.0018          | 0.0014                   | 0.0015                    | 0.0033           | 0.0022            | 0.0102                | 0.0293                           |
| 48  | JAWA BARAT       | (22) KOTA BEKASI (9)             | 0.0066                           | 0.0038                   | 0.0017                    | 0.0071           | 0.0057            | 0.0249                               | 0.0035          | 0.0031                   | 0.0026                    | 0.0033           | 0.0022            | 0.0147                | 0.0396                           |
| 49  | JAWA BARAT       | (24) KOTA BOGOR (9)              | 0.0066                           | 0.0038                   | 0.0017                    | 0.0071           | 0.0057            | 0.0249                               | 0.0035          | 0.0031                   | 0.0026                    | 0.0033           | 0.0022            | 0.0147                | 0.0396                           |
| 50  | JAWA BARAT       | (41) KOTA CIREBON (17)           | 0.0066                           | 0.0038                   | 0.0017                    | 0.0071           | 0.0057            | 0.0249                               | 0.0018          | 0.0014                   | 0.0015                    | 0.0033           | 0.0022            | 0.0102                | 0.0351                           |
| 51  | JAWA BARAT       | (47) KAB. BOGOR (9)              | 0.0066                           | 0.0038                   | 0.0017                    | 0.0071           | 0.0057            | 0.0249                               | 0.0035          | 0.0031                   | 0.0026                    | 0.0033           | 0.0022            | 0.0147                | 0.0396                           |
| 52  | JAWA BARAT       | (60) KOTA SUKABUMI (13)          | 0.0066                           | 0.0033                   | 0.0017                    | 0.0071           | 0.0029            | 0.0216                               | 0.0035          | 0.0014                   | 0.0015                    | 0.0033           | 0.0052            | 0.0149                | 0.0365                           |
| 53  | JAWA BARAT       | (65) KAB. KARAWANG (9)           | 0.0066                           | 0.0038                   | 0.0017                    | 0.0071           | 0.0057            | 0.0249                               | 0.0035          | 0.0031                   | 0.0026                    | 0.0033           | 0.0022            | 0.0147                | 0.0396                           |
| 54  | JAWA BARAT       | (7) KAB. BEKASI (9)              | 0.0066                           | 0.0038                   | 0.0017                    | 0.0071           | 0.0057            | 0.0249                               | 0.0035          | 0.0031                   | 0.0026                    | 0.0033           | 0.0022            | 0.0147                | 0.0396                           |
| 55  | JAWA BARAT       | (73) KAB. INDRAMAYU (31)         | 0.0040                           | 0.0033                   | 0.0017                    | 0.0071           | 0.0057            | 0.0218                               | 0.0018          | 0.0014                   | 0.0015                    | 0.0016           | 0.0008            | 0.0071                | 0.0289                           |

| NO. | PROPINSI        | KABUPATEN/KOTA             | INFRASTRUKTUR FISIK              |                          |                           |                  |                   |                                      |                              |                          |                           |                  |                   |                                  | TOTAL SCORE<br>0.1272 |
|-----|-----------------|----------------------------|----------------------------------|--------------------------|---------------------------|------------------|-------------------|--------------------------------------|------------------------------|--------------------------|---------------------------|------------------|-------------------|----------------------------------|-----------------------|
|     |                 |                            | Ketersediaan Infrastruktur Fisik |                          |                           |                  |                   |                                      | Kualitas Infrastruktur Fisik |                          |                           |                  |                   |                                  |                       |
|     |                 |                            | Jalan<br>0.0138                  | Pelabuhan Laut<br>0.0141 | Pelabuhan Udara<br>0.0058 | Telepon<br>0.016 | Listrik<br>0.0175 | Sub Total Ketersediaan Infrastruktur | Jalan<br>0.0095              | Pelabuhan Laut<br>0.0089 | Pelabuhan Udara<br>0.0073 | Telepon<br>0.204 | Listrik<br>0.0139 | Sub Total Kualitas Infrastruktur |                       |
| 56  | JAWA TENGAH     | (1) KOTA SEMARANG (2)      | 0.0066                           | 0.0051                   | 0.0017                    | 0.0071           | 0.0029            | 0.0234                               | 0.0035                       | 0.0035                   | 0.0026                    | 0.0074           | 0.0052            | 0.0222                           | 0.0456                |
| 57  | JAWA TENGAH     | (10) KAB. KENDAL (5)       | 0.0066                           | 0.0038                   | 0.0017                    | 0.0071           | 0.0057            | 0.0249                               | 0.0018                       | 0.0014                   | 0.0022                    | 0.0074           | 0.0052            | 0.0180                           | 0.0429                |
| 58  | JAWA TENGAH     | (11) KAB. PEMALANG (32)    | 0.0066                           | 0.0033                   | 0.0017                    | 0.0044           | 0.0011            | 0.0171                               | 0.0018                       | 0.0014                   | 0.0015                    | 0.0016           | 0.0052            | 0.0115                           | 0.0286                |
| 59  | JAWA TENGAH     | (14) KOTA PEKALONGAN (22)  | 0.0066                           | 0.0033                   | 0.0017                    | 0.0044           | 0.0011            | 0.0171                               | 0.0035                       | 0.0014                   | 0.0015                    | 0.0033           | 0.0052            | 0.0149                           | 0.0320                |
| 60  | JAWA TENGAH     | (19) KAB. PEKALONGAN (18)  | 0.0066                           | 0.0033                   | 0.0017                    | 0.0044           | 0.0057            | 0.0217                               | 0.0018                       | 0.0014                   | 0.0015                    | 0.0033           | 0.0052            | 0.0132                           | 0.0349                |
| 61  | JAWA TENGAH     | (27) KAB. MAGELANG (22)    | 0.0066                           | 0.0033                   | 0.0017                    | 0.0044           | 0.0011            | 0.0171                               | 0.0035                       | 0.0014                   | 0.0015                    | 0.0033           | 0.0052            | 0.0149                           | 0.0320                |
| 62  | JAWA TENGAH     | (28) KAB. TEGAL (25)       | 0.0066                           | 0.0038                   | 0.0017                    | 0.0031           | 0.0011            | 0.0163                               | 0.0035                       | 0.0014                   | 0.0015                    | 0.0033           | 0.0052            | 0.0149                           | 0.0312                |
| 63  | JAWA TENGAH     | (3) KOTA TEGAL (15)        | 0.0066                           | 0.0033                   | 0.0017                    | 0.0044           | 0.0011            | 0.0171                               | 0.0018                       | 0.0031                   | 0.0015                    | 0.0074           | 0.0052            | 0.0190                           | 0.0361                |
| 64  | JAWA TENGAH     | (50) KAB. SUKOHARJO (8)    | 0.0066                           | 0.0033                   | 0.0017                    | 0.0071           | 0.0029            | 0.0216                               | 0.0018                       | 0.0014                   | 0.0026                    | 0.0074           | 0.0052            | 0.0184                           | 0.0400                |
| 65  | D.I. YOGYAKARTA | (33) KOTA YOGYAKARTA (6)   | 0.0066                           | 0.0033                   | 0.0017                    | 0.0071           | 0.0029            | 0.0216                               | 0.0035                       | 0.0014                   | 0.0026                    | 0.0074           | 0.0052            | 0.0201                           | 0.0417                |
| 66  | JAWA TIMUR      | (112) KAB. BANGKALAN (45)  | 0.0040                           | 0.0033                   | 0.0017                    | 0.0071           | 0.0011            | 0.0172                               | 0.0035                       | 0.0014                   | 0.0015                    | 0.0016           | 0.0008            | 0.0088                           | 0.0260                |
| 67  | JAWA TIMUR      | (120) KAB. PAMEKASAN (45)  | 0.0040                           | 0.0033                   | 0.0017                    | 0.0071           | 0.0011            | 0.0172                               | 0.0035                       | 0.0014                   | 0.0015                    | 0.0016           | 0.0008            | 0.0088                           | 0.0260                |
| 68  | JAWA TIMUR      | (15) KOTA MALANG (28)      | 0.0066                           | 0.0038                   | 0.0017                    | 0.0071           | 0.0011            | 0.0203                               | 0.0035                       | 0.0014                   | 0.0022                    | 0.0016           | 0.0008            | 0.0095                           | 0.0298                |
| 69  | JAWA TIMUR      | (17) KAB. SIDOARJO (4)     | 0.0066                           | 0.0038                   | 0.0017                    | 0.0071           | 0.0029            | 0.0221                               | 0.0035                       | 0.0031                   | 0.0026                    | 0.0074           | 0.0052            | 0.0218                           | 0.0439                |
| 70  | JAWA TIMUR      | (18) KOTA SURABAYA (2)     | 0.0066                           | 0.0051                   | 0.0017                    | 0.0071           | 0.0029            | 0.0234                               | 0.0035                       | 0.0035                   | 0.0026                    | 0.0074           | 0.0052            | 0.0222                           | 0.0456                |
| 71  | JAWA TIMUR      | (56) KAB. PASURUAN (7)     | 0.0040                           | 0.0033                   | 0.0017                    | 0.0071           | 0.0029            | 0.0190                               | 0.0035                       | 0.0035                   | 0.0022                    | 0.0074           | 0.0052            | 0.0218                           | 0.0408                |
| 72  | JAWA TIMUR      | (72) KAB. MOJOKERTO (37)   | 0.0040                           | 0.0033                   | 0.0017                    | 0.0071           | 0.0029            | 0.0190                               | 0.0035                       | 0.0014                   | 0.0015                    | 0.0016           | 0.0008            | 0.0088                           | 0.0278                |
| 73  | JAWA TIMUR      | (8) KOTA KEDIRI (19)       | 0.0066                           | 0.0033                   | 0.0017                    | 0.0071           | 0.0011            | 0.0198                               | 0.0035                       | 0.0014                   | 0.0015                    | 0.0033           | 0.0052            | 0.0149                           | 0.0347                |
| 74  | JAWA TIMUR      | (82) KAB. KEDIRI (45)      | 0.0040                           | 0.0033                   | 0.0017                    | 0.0071           | 0.0011            | 0.0172                               | 0.0035                       | 0.0014                   | 0.0015                    | 0.0016           | 0.0008            | 0.0088                           | 0.0260                |
| 75  | JAWA TIMUR      | (85) KOTA MOJOKERTO (57)   | 0.0018                           | 0.0033                   | 0.0017                    | 0.0071           | 0.0011            | 0.0150                               | 0.0035                       | 0.0014                   | 0.0015                    | 0.0016           | 0.0008            | 0.0088                           | 0.0238                |
| 76  | JAWA TIMUR      | (87) KAB. BLITAR (45)      | 0.0040                           | 0.0033                   | 0.0017                    | 0.0071           | 0.0011            | 0.0172                               | 0.0035                       | 0.0014                   | 0.0015                    | 0.0016           | 0.0008            | 0.0088                           | 0.0260                |
| 77  | JAWA TIMUR      | (92) KOTA PROBOLINGGO (44) | 0.0018                           | 0.0033                   | 0.0017                    | 0.0071           | 0.0011            | 0.0150                               | 0.0035                       | 0.0031                   | 0.0022                    | 0.0016           | 0.0008            | 0.0112                           | 0.0262                |
| 78  | JAWA TIMUR      | (96) KAB. MAGETAN (45)     | 0.0040                           | 0.0033                   | 0.0017                    | 0.0071           | 0.0011            | 0.0172                               | 0.0035                       | 0.0014                   | 0.0015                    | 0.0016           | 0.0008            | 0.0088                           | 0.0260                |
| 79  | JAWA TIMUR      | (99) KAB. BANYUWANGI (34)  | 0.0040                           | 0.0038                   | 0.0017                    | 0.0071           | 0.0011            | 0.0177                               | 0.0035                       | 0.0031                   | 0.0015                    | 0.0016           | 0.0008            | 0.0105                           | 0.0282                |
| 80  | BALI            | (16) KAB. GIANYAR (23)     | 0.0066                           | 0.0033                   | 0.0017                    | 0.0044           | 0.0029            | 0.0189                               | 0.0035                       | 0.0014                   | 0.0026                    | 0.0033           | 0.0022            | 0.0130                           | 0.0319                |
| 81  | BALI            | (20) KAB. BADUNG (10)      | 0.0066                           | 0.0038                   | 0.0017                    | 0.0044           | 0.0029            | 0.0194                               | 0.0035                       | 0.0014                   | 0.0026                    | 0.0074           | 0.0052            | 0.0201                           | 0.0395                |
| 82  | BALI            | (26) KOTA DENPASAR (11)    | 0.0066                           | 0.0038                   | 0.0017                    | 0.0044           | 0.0029            | 0.0194                               | 0.0035                       | 0.0031                   | 0.0026                    | 0.0074           | 0.0022            | 0.0188                           | 0.0382                |
| 83  | BALI            | (52) KAB. TABANAN (27)     | 0.0066                           | 0.0033                   | 0.0017                    | 0.0044           | 0.0011            | 0.0171                               | 0.0035                       | 0.0014                   | 0.0026                    | 0.0033           | 0.0022            | 0.0130                           | 0.0301                |

| NO. | PROPINSI           | KABUPATEN/KOTA                      | INFRASTRUKTUR FISIK              |                          |                           |                  |                   |                                      |                              |                          |                           |                  |                   |                                  | TOTAL SCORE<br>0.1272 |
|-----|--------------------|-------------------------------------|----------------------------------|--------------------------|---------------------------|------------------|-------------------|--------------------------------------|------------------------------|--------------------------|---------------------------|------------------|-------------------|----------------------------------|-----------------------|
|     |                    |                                     | Ketersediaan Infrastruktur Fisik |                          |                           |                  |                   |                                      | Kualitas Infrastruktur Fisik |                          |                           |                  |                   |                                  |                       |
|     |                    |                                     | Jalan<br>0.0138                  | Pelabuhan Laut<br>0.0141 | Pelabuhan Udara<br>0.0058 | Telepon<br>0.016 | Listrik<br>0.0175 | Sub Total Ketersediaan Infrastruktur | Jalan<br>0.0095              | Pelabuhan Laut<br>0.0089 | Pelabuhan Udara<br>0.0073 | Telepon<br>0.204 | Listrik<br>0.0139 | Sub Total Kualitas Infrastruktur |                       |
| 84  | BALI               | (53) KAB. JEMBRANA (30)             | 0.0066                           | 0.0038                   | 0.0017                    | 0.0031           | 0.0011            | 0.0163                               | 0.0035                       | 0.0014                   | 0.0026                    | 0.0033           | 0.0022            | 0.0130                           | 0.0293                |
| 85  | BALI               | (62) KAB. BULELENG (39)             | 0.0066                           | 0.0033                   | 0.0017                    | 0.0031           | 0.0011            | 0.0158                               | 0.0035                       | 0.0014                   | 0.0026                    | 0.0016           | 0.0022            | 0.0113                           | 0.0271                |
| 86  | BALI               | (71) KAB. BANGLI (33)               | 0.0066                           | 0.0033                   | 0.0017                    | 0.0044           | 0.0011            | 0.0171                               | 0.0035                       | 0.0014                   | 0.0026                    | 0.0016           | 0.0022            | 0.0113                           | 0.0284                |
| 87  | KALIMANTAN BARAT   | (103) KAB. SAMBAS (65)              | 0.0009                           | 0.0033                   | 0.0006                    | 0.0031           | 0.0011            | 0.0090                               | 0.0003                       | 0.0014                   | 0.0015                    | 0.0074           | 0.0008            | 0.0114                           | 0.0204                |
| 88  | KALIMANTAN BARAT   | (104) KAB. KAPUAS HULU (89)         | 0.0005                           | 0.0033                   | 0.0006                    | 0.0005           | 0.0007            | 0.0056                               | 0.0003                       | 0.0003                   | 0.0026                    | 0.0033           | 0.0008            | 0.0073                           | 0.0129                |
| 89  | KALIMANTAN BARAT   | (110) KAB. KETAPANG (92)            | 0.0009                           | 0.0033                   | 0.0017                    | 0.0005           | 0.0007            | 0.0071                               | 0.0006                       | 0.0014                   | 0.0007                    | 0.0016           | 0.0008            | 0.0051                           | 0.0122                |
| 90  | KALIMANTAN BARAT   | (74) KAB. SANGGAU (93)              | 0.0009                           | 0.0013                   | 0.0003                    | 0.0005           | 0.0007            | 0.0037                               | 0.0018                       | 0.0006                   | 0.0003                    | 0.0016           | 0.0008            | 0.0051                           | 0.0088                |
| 91  | KALIMANTAN BARAT   | (86) KAB. PONTIANAK (34)            | 0.0066                           | 0.0038                   | 0.0017                    | 0.0031           | 0.0011            | 0.0163                               | 0.0018                       | 0.0031                   | 0.0015                    | 0.0033           | 0.0022            | 0.0119                           | 0.0282                |
| 92  | KALIMANTAN TENGAH  | (67) KAB. BARITO UTARA (87)         | 0.0005                           | 0.0013                   | 0.0003                    | 0.0005           | 0.0007            | 0.0033                               | 0.0018                       | 0.0031                   | 0.0015                    | 0.0033           | 0.0008            | 0.0105                           | 0.0138                |
| 93  | KALIMANTAN TENGAH  | (74) KAB. BARITO SELATAN (73)       | 0.0009                           | 0.0013                   | 0.0017                    | 0.0031           | 0.0007            | 0.0077                               | 0.0018                       | 0.0003                   | 0.0003                    | 0.0033           | 0.0052            | 0.0109                           | 0.0186                |
| 94  | KALIMANTAN TENGAH  | (95) KAB. KAPUAS (52)               | 0.0009                           | 0.0013                   | 0.0017                    | 0.0044           | 0.0007            | 0.0090                               | 0.0003                       | 0.0003                   | 0.0022                    | 0.0074           | 0.0052            | 0.0154                           | 0.0244                |
| 95  | KALIMANTAN SELATAN | (108) KAB. HULU SUNGAI SELATAN (85) | 0.0009                           | 0.0033                   | 0.0017                    | 0.0010           | 0.0011            | 0.0080                               | 0.0006                       | 0.0014                   | 0.0003                    | 0.0033           | 0.0022            | 0.0078                           | 0.0158                |
| 96  | KALIMANTAN SELATAN | (116) KAB. TAPIN (83)               | 0.0009                           | 0.0033                   | 0.0017                    | 0.0010           | 0.0011            | 0.0080                               | 0.0006                       | 0.0014                   | 0.0015                    | 0.0033           | 0.0022            | 0.0090                           | 0.0170                |
| 97  | KALIMANTAN SELATAN | (69) KAB. TABALONG (83)             | 0.0009                           | 0.0033                   | 0.0017                    | 0.0010           | 0.0011            | 0.0080                               | 0.0006                       | 0.0014                   | 0.0015                    | 0.0033           | 0.0022            | 0.0090                           | 0.0170                |
| 98  | KALIMANTAN SELATAN | (78) KAB. HULU SUNGAI UTARA (83)    | 0.0009                           | 0.0033                   | 0.0017                    | 0.0010           | 0.0011            | 0.0080                               | 0.0006                       | 0.0014                   | 0.0015                    | 0.0033           | 0.0022            | 0.0090                           | 0.0170                |
| 99  | KALIMANTAN SELATAN | (81) KAB. HULU SUNGAI TENGAH (83)   | 0.0009                           | 0.0033                   | 0.0017                    | 0.0010           | 0.0011            | 0.0080                               | 0.0006                       | 0.0014                   | 0.0015                    | 0.0033           | 0.0022            | 0.0090                           | 0.0170                |
| 100 | KALIMANTAN SELATAN | (83) KAB. TANAH LAUT (81)           | 0.0009                           | 0.0033                   | 0.0017                    | 0.0010           | 0.0011            | 0.0080                               | 0.0006                       | 0.0031                   | 0.0015                    | 0.0033           | 0.0008            | 0.0093                           | 0.0173                |
| 101 | KALIMANTAN TIMUR   | (2) KOTA BALIKPAPAN (14)            | 0.0066                           | 0.0038                   | 0.0017                    | 0.0044           | 0.0011            | 0.0176                               | 0.0035                       | 0.0031                   | 0.0026                    | 0.0074           | 0.0022            | 0.0188                           | 0.0364                |
| 102 | KALIMANTAN TIMUR   | (21) KAB. BERAU (68)                | 0.0009                           | 0.0038                   | 0.0017                    | 0.0010           | 0.0011            | 0.0085                               | 0.0018                       | 0.0014                   | 0.0022                    | 0.0033           | 0.0022            | 0.0109                           | 0.0194                |
| 103 | KALIMANTAN TIMUR   | (22) KAB. KUTAI (60)                | 0.0040                           | 0.0038                   | 0.0017                    | 0.0031           | 0.0011            | 0.0137                               | 0.0018                       | 0.0014                   | 0.0015                    | 0.0016           | 0.0022            | 0.0085                           | 0.0222                |
| 104 | KALIMANTAN TIMUR   | (39) KOTA SAMARINDA (20)            | 0.0066                           | 0.0038                   | 0.0017                    | 0.0044           | 0.0011            | 0.0176                               | 0.0035                       | 0.0014                   | 0.0015                    | 0.0074           | 0.0022            | 0.0160                           | 0.0336                |
| 105 | KALIMANTAN TIMUR   | (64) KAB. PASIR (83)                | 0.0009                           | 0.0051                   | 0.0017                    | 0.0010           | 0.0011            | 0.0098                               | 0.0018                       | 0.0006                   | 0.0007                    | 0.0033           | 0.0008            | 0.0072                           | 0.0170                |
| 106 | SULAWESI UTARA     | (38) KOTA MANADO (38)               | 0.0040                           | 0.0051                   | 0.0017                    | 0.0044           | 0.0007            | 0.0159                               | 0.0018                       | 0.0035                   | 0.0026                    | 0.0016           | 0.0022            | 0.0117                           | 0.0276                |
| 107 | SULAWESI UTARA     | (44) KOTA BITUNG (48)               | 0.0009                           | 0.0038                   | 0.0017                    | 0.0010           | 0.0007            | 0.0081                               | 0.0035                       | 0.0031                   | 0.0022                    | 0.0074           | 0.0008            | 0.0170                           | 0.0251                |
| 108 | SULAWESI UTARA     | (45) KAB. MINAHASA (63)             | 0.0018                           | 0.0033                   | 0.0017                    | 0.0010           | 0.0007            | 0.0085                               | 0.0018                       | 0.0014                   | 0.0015                    | 0.0074           | 0.0008            | 0.0129                           | 0.0214                |
| 109 | SULAWESI UTARA     | (76) KAB. SANGIHE TALAUD (77)       | 0.0018                           | 0.0033                   | 0.0017                    | 0.0005           | 0.0007            | 0.0080                               | 0.0003                       | 0.0006                   | 0.0007                    | 0.0074           | 0.0008            | 0.0098                           | 0.0178                |
| 110 | GORONTALO          | (101) KAB. GORONTALO (66)           | 0.0018                           | 0.0038                   | 0.0017                    | 0.0031           | 0.0007            | 0.0111                               | 0.0018                       | 0.0014                   | 0.0015                    | 0.0033           | 0.0008            | 0.0088                           | 0.0199                |
| 111 | GORONTALO          | (46) KOTA GORONTALO (53)            | 0.0018                           | 0.0038                   | 0.0017                    | 0.0044           | 0.0007            | 0.0124                               | 0.0035                       | 0.0014                   | 0.0015                    | 0.0033           | 0.0022            | 0.0119                           | 0.0243                |

| NO. | PROPINSI            | KABUPATEN/KOTA                        | INFRASTRUKTUR FISIK              |                          |                           |                  |                   |                                      |                              |                          |                           |                  |                   |                                  | TOTAL SCORE<br>0.1272 |
|-----|---------------------|---------------------------------------|----------------------------------|--------------------------|---------------------------|------------------|-------------------|--------------------------------------|------------------------------|--------------------------|---------------------------|------------------|-------------------|----------------------------------|-----------------------|
|     |                     |                                       | Ketersediaan Infrastruktur Fisik |                          |                           |                  |                   |                                      | Kualitas Infrastruktur Fisik |                          |                           |                  |                   |                                  |                       |
|     |                     |                                       | Jalan<br>0.0138                  | Pelabuhan Laut<br>0.0141 | Pelabuhan Udara<br>0.0058 | Telepon<br>0.016 | Listrik<br>0.0175 | Sub Total Ketersediaan Infrastruktur | Jalan<br>0.0095              | Pelabuhan Laut<br>0.0089 | Pelabuhan Udara<br>0.0073 | Telepon<br>0.204 | Listrik<br>0.0139 | Sub Total Kualitas Infrastruktur |                       |
| 112 | SULAWESI TENGAH     | (100) KAB. POSO (78)                  | 0.0009                           | 0.0033                   | 0.0003                    | 0.0031           | 0.0011            | 0.0087                               | 0.0006                       | 0.0014                   | 0.0015                    | 0.0033           | 0.0022            | 0.0090                           | 0.0177                |
| 113 | SULAWESI TENGAH     | (28) KAB. BANGGAI (50)                | 0.0009                           | 0.0033                   | 0.0006                    | 0.0031           | 0.0029            | 0.0108                               | 0.0006                       | 0.0014                   | 0.0022                    | 0.0074           | 0.0022            | 0.0138                           | 0.0246                |
| 114 | SULAWESI TENGAH     | (39) KAB. TOLI TOLI (80)              | 0.0009                           | 0.0013                   | 0.0003                    | 0.0005           | 0.0007            | 0.0037                               | 0.0006                       | 0.0014                   | 0.0022                    | 0.0074           | 0.0022            | 0.0138                           | 0.0175                |
| 115 | SULAWESI TENGAH     | (40) KAB. DONGGALA (56)               | 0.0009                           | 0.0038                   | 0.0017                    | 0.0031           | 0.0007            | 0.0102                               | 0.0006                       | 0.0014                   | 0.0022                    | 0.0074           | 0.0022            | 0.0138                           | 0.0240                |
| 116 | SULAWESI TENGAH     | (51) KAB. MOROWALI (62)               | 0.0009                           | 0.0033                   | 0.0006                    | 0.0044           | 0.0007            | 0.0099                               | 0.0006                       | 0.0014                   | 0.0003                    | 0.0074           | 0.0022            | 0.0119                           | 0.0218                |
| 117 | SULAWESI TENGGARA   | (48) KAB. KOLAKA (79)                 | 0.0009                           | 0.0033                   | 0.0006                    | 0.0031           | 0.0007            | 0.0086                               | 0.0006                       | 0.0014                   | 0.0015                    | 0.0033           | 0.0022            | 0.0090                           | 0.0176                |
| 118 | SULAWESI TENGGARA   | (79) KAB. BUTON (82)                  | 0.0009                           | 0.0033                   | 0.0006                    | 0.0031           | 0.0007            | 0.0086                               | 0.0018                       | 0.0006                   | 0.0007                    | 0.0033           | 0.0022            | 0.0086                           | 0.0172                |
| 119 | SULAWESI SELATAN    | (25) KOTA PARE-PARE (46)              | 0.0040                           | 0.0033                   | 0.0017                    | 0.0005           | 0.0007            | 0.0102                               | 0.0018                       | 0.0035                   | 0.0015                    | 0.0033           | 0.0052            | 0.0153                           | 0.0255                |
| 120 | SULAWESI SELATAN    | (31) KAB. PANGKAJENE & KEPULAUAN (76) | 0.0009                           | 0.0038                   | 0.0017                    | 0.0031           | 0.0007            | 0.0102                               | 0.0006                       | 0.0014                   | 0.0003                    | 0.0033           | 0.0022            | 0.0078                           | 0.0180                |
| 121 | SULAWESI SELATAN    | (63) KAB. PINRANG (51)                | 0.0018                           | 0.0033                   | 0.0017                    | 0.0031           | 0.0007            | 0.0106                               | 0.0018                       | 0.0014                   | 0.0022                    | 0.0033           | 0.0052            | 0.0139                           | 0.0245                |
| 122 | SULAWESI SELATAN    | (93) KAB. TANA TORAJA (74)            | 0.0009                           | 0.0033                   | 0.0017                    | 0.0031           | 0.0007            | 0.0097                               | 0.0006                       | 0.0003                   | 0.0022                    | 0.0033           | 0.0022            | 0.0086                           | 0.0183                |
| 123 | SULAWESI SELATAN    | (94) KAB. MAJENE (86)                 | 0.0009                           | 0.0013                   | 0.0017                    | 0.0005           | 0.0007            | 0.0051                               | 0.0006                       | 0.0031                   | 0.0003                    | 0.0033           | 0.0022            | 0.0095                           | 0.0146                |
| 124 | SULAWESI SELATAN    | (98) KAB. LUWU (69)                   | 0.0009                           | 0.0033                   | 0.0017                    | 0.0031           | 0.0007            | 0.0097                               | 0.0006                       | 0.0031                   | 0.0003                    | 0.0033           | 0.0022            | 0.0095                           | 0.0192                |
| 125 | NUSA TENGGARA BARAT | (124) KAB. LOMBOK BARAT (52)          | 0.0066                           | 0.0033                   | 0.0006                    | 0.0044           | 0.0007            | 0.0156                               | 0.0018                       | 0.0014                   | 0.0015                    | 0.0033           | 0.0008            | 0.0088                           | 0.0244                |
| 126 | NUSA TENGGARA BARAT | (126) KAB. BIMA (91)                  | 0.0018                           | 0.0013                   | 0.0006                    | 0.0005           | 0.0007            | 0.0049                               | 0.0006                       | 0.0014                   | 0.0015                    | 0.0033           | 0.0008            | 0.0076                           | 0.0125                |
| 127 | NUSA TENGGARA BARAT | (66) KOTA MATARAM (56)                | 0.0040                           | 0.0033                   | 0.0017                    | 0.0031           | 0.0007            | 0.0128                               | 0.0035                       | 0.0014                   | 0.0022                    | 0.0033           | 0.0008            | 0.0112                           | 0.0240                |
| 128 | NUSA TENGGARA TIMUR | (117) KAB. ENDE (70)                  | 0.0040                           | 0.0013                   | 0.0003                    | 0.0005           | 0.0007            | 0.0068                               | 0.0018                       | 0.0014                   | 0.0022                    | 0.0016           | 0.0052            | 0.0122                           | 0.0190                |
| 129 | NUSA TENGGARA TIMUR | (120) KAB. FLORES TIMUR (72)          | 0.0018                           | 0.0033                   | 0.0003                    | 0.0005           | 0.0007            | 0.0066                               | 0.0018                       | 0.0014                   | 0.0022                    | 0.0016           | 0.0052            | 0.0122                           | 0.0188                |
| 130 | NUSA TENGGARA TIMUR | (32) KOTA KUPANG (43)                 | 0.0040                           | 0.0033                   | 0.0017                    | 0.0031           | 0.0007            | 0.0128                               | 0.0035                       | 0.0031                   | 0.0015                    | 0.0033           | 0.0022            | 0.0136                           | 0.0264                |
| 131 | NUSA TENGGARA TIMUR | (72) KAB. TIMOR TENGAH UTARA (84)     | 0.0018                           | 0.0013                   | 0.0003                    | 0.0005           | 0.0007            | 0.0046                               | 0.0018                       | 0.0031                   | 0.0015                    | 0.0033           | 0.0022            | 0.0119                           | 0.0165                |
| 132 | NUSA TENGGARA TIMUR | (97) KAB. TIMOR TENGAH SELATAN (74)   | 0.0040                           | 0.0033                   | 0.0003                    | 0.0005           | 0.0007            | 0.0088                               | 0.0018                       | 0.0014                   | 0.0022                    | 0.0033           | 0.0008            | 0.0095                           | 0.0183                |
| 133 | PAPUA               | (58) KAB. FAKFAK (90)                 | 0.0005                           | 0.0013                   | 0.0003                    | 0.0005           | 0.0007            | 0.0033                               | 0.0003                       | 0.0031                   | 0.0022                    | 0.0016           | 0.0022            | 0.0094                           | 0.0127                |
| 134 | PAPUA               | (80) KAB. MANOKWARI (85)              | 0.0009                           | 0.0033                   | 0.0017                    | 0.0005           | 0.0007            | 0.0071                               | 0.0003                       | 0.0031                   | 0.0015                    | 0.0016           | 0.0022            | 0.0087                           | 0.0158                |

# Lampiran 5. Kajian Peraturan Daerah

## Lampiran 5.1.

### Panduan Kajian Peraturan Daerah / Guideline in Analyzing Regional Regulation

Kajian produk hukum daerah (peraturan daerah, SK Kepala Daerah, dll), dilakukan dengan melihat tingkat kebermasalahan setiap produk hukum tersebut. Tingkat kebermasalahan produk hukum daerah dikelompokkan menjadi empat tingkat, sebagai berikut :

#### I. TIDAK BERMASALAH :

Tidak ditemukan adanya permasalahan sama sekali, atau kesalahan yang ditemukan tidak cukup signifikan, misalnya kesalahan pengetikan, redaksional, dan sebagainya. Dengan kesalahan seperti di atas dianggap tidak bermasalah, sepanjang kesalahan tersebut tidak menimbulkan permasalahan yuridis, substansial, dan prinsip.

#### II. BERMASALAH YURIDIS :

Merupakan permasalahan-permasalahan yang diakibatkan pelanggaran ketentuan yuridis yang sifatnya tidak substansial dan prinsip, seperti:

1. **Relevansi Acuan Yuridis** : apabila acuan yuridis yang digunakan sebagai dasar pertimbangan perda tidak relevan dengan apa yang diatur dalam perda yang bersangkutan. Sebagai contoh Perda yang mengatur tentang peternakan menggunakan UU, PP, yang mengatur tentang Pertambangan sebagai salah satu dasar konsiderannya, dan sebagainya.
2. **Acuan Yuridis Tidak Up to date** : apabila acuan yuridis yang digunakan oleh perda sudah tidak *up to date* lagi (sudah diganti/dirubah/tidak berlaku). Sebagai contoh Perda Pajak dan Retribusi yang ditetapkan pada tahun 2001, menggunakan konsideran yuridis UU No.18 Tahun 1997.
3. **Kelengkapan Yuridis** : secara material ada beberapa persyaratan sebagaimana diatur dalam UU No.34 Tahun 2000 dan PP No.65 dan 66 Tahun 2001. Seperti :

*The regions' legal products (Regional Regulation, Decree of the Regent/Mayor, etc.) is analyzed by looking as its problem levels, classified into four categories:*

#### NON-PROBLEMATIC

*This category is given to those regional products showing no problem at all or not showing any significant problem such as typographical error, grammar, etc. Such incremental problems are just considered non-problematic so long as no juridical, substantial, and principle problems are found.*

#### JURIDICALLY PROBLEMATIC

*This category is for those regional products showing problems related to the violation of juridical provisions, which are not substantial and principle in nature. The likely problems are as follows:*

1. **Irrelevance of Juridical Reference** : *The juridical reference used in the consideration of regional regulation is not relevant with the substance regulated in such regulation. Regional Regulation for Animal Husbandry, for example, uses Law or Government Regulation on Mining as its reference.*
2. **Out of Date Juridical Reference** : *The juridical reference used is out of date because it has been amended or no longer applicable. For example, a regional regulation on regional tax or regional retribution stipulated in 2001 still uses Law Number 18 Year 1997 as its juridical reference while it has been amended by a new one.*
3. **Juridical Incompleteness** : *There are some requirements for a regional regulation on regional tax or regional retribution to be considered complete as regulated in Law*



a. Perda Pajak Sekurang-kurangnya mengatur:

- 1) Nama, obyek, dan subyek pajak;
- 2) Dasar pengenaan, tarif, dan cara penghitungan pajak;
- 3) Wilayah pemungutan;
- 4) Masa pajak;
- 5) Penetapan;
- 6) Tata cara pembayaran dan penagihan;
- 7) Kadaluwarsa;
- 8) Sanksi administratif; dan
- 9) Tanggal mulai berlaku.

b. Perda Retribusi Sekurang-kurangnya mengatur mengenai :

- 1) Nama, obyek, dan subyek Retribusi;
- 2) Golongan retribusi; Cara mengukur tingkat penggunaan jasa yang bersangkutan;
- 3) Struktur dan besarnya tarif;
- 4) Wilayah pungutan;
- 5) Tata cara pemungutan;
- 6) Sanksi administratif;
- 7) Tata cara penagihan; dan
- 8) Tanggal berlaku.

Untuk Perda yang termasuk bermasalah YURIDIS rekomendasi yang diberikan adalah di "REVISI" / "DILENGKAPI", dengan disertai / disebutkan secara jelas usulan revisi atau bagian-bagian yang perlu direvisi. Misalnya : penghilangan atau penambahan pasal-pasal tertentu.

### III. BERMASALAH SUBSTANSI :

Merupakan pelanggaran atas ketentuan-ketentuan substansial seperti ketidak sesuaian antara tujuan dan isi yang diatur, kejelasan obyek, subyek, hak dan kewajiban para pihak, prosedur, standar pelayanan, filosofi pungutan, prinsip golongan, dan sebagainya, seperti berikut :

1. **Diskoneksi antara Tujuan dan Isi** : antara tujuan yang hendak dicapai, (yang termuat dalam bagian tujuan perda / pengaturan) tidak sesuai dengan materi yang diatur dalam pasal-pasal yang lainnya. Contoh : Perda yang dibuat dengan tujuan untuk

*Number 34 Year 2000 and Government Regulation Number 65 and 66 Year 2001 such as:*

**a. Regional Regulation on Regional Tax, at least, should regulate the following subjects:**

- 1) *Name, object, and subject of tax;*
- 2) *Basis of imposition, tariff, and calculation method;*
- 3) *Area of collection;*
- 4) *Tax period;*
- 5) *Stipulation;*
- 6) *Payment and collection procedures;*
- 7) *Expiration;*
- 8) *Administrative sanction; and*
- 9) *Date of effective implementation.*

**b. Regional Regulation on retribution, at least, should regulate the following:**

- 1) *Name, object, and subject of retribution;*
- 2) *Categorization, method in measuring service utility level;*
- 3) *Structure and amount of tariff;*
- 4) *Area of collection;*
- 5) *Collection procedure;*
- 6) *Administrative sanction;*
- 7) *Claim procedure; and*
- 8) *Date of effective implementation.*

*Regional regulations with juridical problems were recommended for REVISION or PERFECTION, specified with clear recommendation on what should be revised or perfected. For example, several articles may necessarily be removed or added.*

### III. SUBSTANTIALLY PROBLEMATIC

*This category refers to the violation of substantial provisions such as discrepancy between the objective and the content, unclear definition of object and/or subject and/or rights and obligations of the parties involved, unclear procedures, unclear service standards, violation to the philosophy of user charges, categorization, and so on. Specified problems and their operational definitions are as follows:*

1. **Discrepancy between the objective and the content** : Provisions provided in the succeeding articles are not consistent with the objective as defined in the previous article. For example, a regional regulation may be composed for the



perlindungan / pelestarian lingkungan hidup, ternyata dalam pasal-pasal yang lain semata-mata hanya mengatur tentang perdagangan / usaha usaha tertentu dan hanya untuk peningkatan PAD semata (kehutanan, limbah, dlsb) dan tidak ada pasal-pasal yang baik secara eksplisit maupun implisit mengatur sesuai dengan tujuan yang hendak dicapai.

2. **Kejelasan obyek** : obyek pungutan / perda tidak dideskripsikan secara jelas sehingga mengakibatkan *gray area* yang mengakibatkan multiinterpretatif.
3. **Kejelasan Subyek** : subyek pungutan / perda tidak dideskripsi secara jelas sehingga mengakibatkan *gray area* yang mengakibatkan multiinterpretatif.
4. **Kejelasan Hak dan Kewajiban Wajib Pungut (Subyek dari Pemberlakuan Perda) maupun Pemerintah** : Tidak dijelaskan / diatur (secara tegas) mengenai hak dan kewajiban wajib pungut (subyek yang dituju dari pemberlakuan perda) maupun hak dan kewajiban dari pemda, sehingga mengakibatkan ketidak pastian hukum.
5. **Kejelasan Prosedur dan Birokrasi (standar pelayanan)** : perda tidak mengatur (tidak secara jelas) tentang prosedur dan birokrasi yang menyangkut standar pelayanan, seperti waktu pelayanan, persyaratan, biaya (struktur tarif), dan sebagainya.
6. **Filosofi dan Prinsip Pungutan (Pajak, Retribusi, Golongan Retribusi, Sumbangan, dlsb)** : Peraturan mengenai pungutan (pajak, retribusi) tidak sesuai dengan filosofi dasar atau prinsip dasar dari berbagai pungutan tersebut, seperti tidak adanya kontraprestasi secara langsung (tidak ada pelayanan / imbal balik jasa) dalam perda tentang retribusi. Demikian juga kesalahan dalam penetapan golongan retribusi, yang dapat mengakibatkan kesalahan secara teknis (misalnya penentuan dasar dan struktur tarif) maupun substansi dari pungutan yang bersangkutan.

Untuk produk hukum yang termasuk dalam kategori bermasalah SUBSTANSI direkomendasikan untuk di "REVISI" atau "DITINJAU ULANG". Untuk produk hukum yang direkomendasikan untuk ditinjau ulang,

*protection of the environment as stated in the article on the objective of the regulation but in most of the articles it simply regulates matters related to trading or tariff oriented to accumulation of Original Regional Revenue (PAD).*

2. **Unclear definition of object** : *A regional regulation does not provide any clear description on the object subjected to levy letting it as a gray area wherein multiple interpretations may be developed and violation on it may be triggered.*
3. **Unclear definition of subject** : *A regional regulation does not provide any clear description on the subject of levy letting it as a gray area wherein multiple interpretations may be developed and violation on it may be triggered*
4. **Unclear definition of the rights and obligations of both taxpayer or retribution payer and government** : *Rights and obligations of the taxpayer or retribution payer and that of the government are not clearly defined, leading to law ambiguity.*
5. **Unclear procedures and service standards** : *A regional regulation does not provide any clear description on the procedures and service standards such as deadline, requirements, tariff, and so on.*
6. **Philosophy and principles of levy (tax, retribution, classification, contribution, etc.)** : *Regulation of levy (tax or retribution) is not compatible with the philosophy of such kind of levy. Regional regulation on retribution, for example, perhaps does not provide any provision on the direct benefit supposed to be enjoyed by retribution payer. A certain regional regulation on retribution may wrongly define the category it belongs, leading to wrong stipulation of tariff stipulation basis and structure).*

*The regional products with SUBSTANTIAL problems are recommended for REVISION or REVIEW. Problematic articles to be reviewed should be indicated.*

perlu dilakukan investigasi lebih jauh tentang pasal-pasal krusial / bermasalah.

#### IV. BERMASALAH PRINSIP :

Bermasalah secara prinsip merupakan pelanggaran terhadap berbagai prinsip secara makro, seperti berdampak negatif terhadap perekonomian, bertentangan dengan kepentingan umum, aspek keadilan dan kemampuan masyarakat, pelanggaran kewenangan, dan lain-lain, yang dijabarkan sebagai berikut :

1. **Prinsip Kesatuan Wilayah Ekonomi (free internal trade)**: Perda melanggar Kesatuan Wilayah Ekonomi, yang memandang negara sebagai satu kesatuan ekonomi yang tidak terpisah-pisahkan, daerah dipandang sebagai bagian integral dalam kesatuan wilayah, sehingga perpindahan barang dan atau jasa / perdagangan dalam negeri (antar daerah) bebas dari hambatan baik tarif maupun non tarif. Pelanggaran atas prinsip ini mengakibatkan terancamnya keutuhan wilayah perekonomian nasional.
2. **Prinsip Persaingan Usaha yang Sehat (monopoli, oligopoli, monopsoni, kemitraan wajib, dll)**: Perda mengakibatkan berkurangnya / hilangnya akses dan kesempatan yang sama bagi tiap lapisan masyarakat untuk melakukan kegiatan usaha / terlibat dalam kegiatan usaha tertentu, dan menutup persaingan secara sehat dari masing-masing pihak karena adanya monopoli, oligopoli dll, atau adanya peraturan mengenai kemitraan wajib yang dapat mengakibatkan (bertendesi) peluang praktek KKN maupun mengakibatkan hubungan yang tidak seimbang, atau ketergantungan dari masing-masing pihak.
3. **Berdampak Negatif terhadap Perekonomian** : Peraturan dalam perda yang mengakibatkan adanya tambahan biaya (ekonomi biaya tinggi) bagi kalangan dunia usaha maupun masyarakat karena, struktur tarif yang tidak wajar, double taxation baik dengan peraturan perpajakan yang lebih tinggi (pusat) maupun tumpang tindih dengan peraturan lain yang sejajar, sehingga menpungutan tersebut mengakibatkan terganggunya perekonomian (terhambatnya perkembangan usaha, bahan mematikan perekonomian usaha, menghalangi kesempatan masyarakat untuk menabung dll).
4. **Menghalangi / Mengurangi Kesempatan**

#### IV. PRINCIPALLY PROBLEMATIC

*This category refers to the violation of principles agreed in the national level such as avoidance of a negative impact on the economy, respect to public interest, justice, high consideration to people's capability, observance on the separation of authority, and so on. The problems of this kind and their operational definitions are as follows:*

1. **Violation to the principle of Free Internal Trade** : *A regional regulation violates the principle of Free Internal Trade, considering a country as an integrated, indivisible economic unit wherein regions are simply integral part of it and wherein inter-regional flow of goods and services is free from any tariff and non-tariff barriers. Violation to this principle simply means threat to economic unity.*
2. **Violation to the principle of Fair Business Competition (monopoly, oligopoly, monopsony, mandatory partnership, etc.)** *A regional regulation leads to the decreased or lost of access or opportunity of a certain group of people to a certain business due to the existence of unfair provisions, which are monopoly or oligopoly in nature. It may be in the form of mandatory partnership that is susceptible to corruption, collusion, and nepotism, and unfair to some parties.*
3. **Negative impact to the economy** : *A regional regulation causes high cost economy for the business community and the whole community because of unfair tariff, and double taxation (the same tax object has been imposed with tax through other regulations either in the national level or regional level). This imposition limits the development of the business and the opportunity of the people to save.*
4. **Violation of public interest** : *A regional*

**masyarakat untuk memperoleh akses (melanggar kepentingan umum)** : Perda mengakibatkan terganggunya kehidupan / kepentingan umum masyarakat atau mengurangi kesempatan masyarakat untuk memperoleh akses terhadap berbagai sumber daya yang seharusnya dapat mereka peroleh, (ekonomi, politik, kebebasan beragama, dan sebagainya).

5. **Pelanggaran Kewenangan Pemerintahan** : Perda mengatur urusan pemerintahan diluar yang menjadi kewenangannya sebagai daerah otonom, atau merupakan kewenanga tingkat pemerintahan yang lebih tinggi atau di bawahnya.

Untuk produk hukum daerah yang melanggar baik satu atau lebih atas persoalan “PRINSIP” direkomendasikan untuk “DIBATALKAN”.

*regulation curb the opportunity for the people to have access on resources and conditions they are entitled to (in terms of economy, politics, religious freedom, etc.)*

5. **Violation of authority**: *A regional regulation regulates matters beyond or not under the level of authority of concerned regional government. It is the authority of a higher or lower level of the government.*

*The regional regulations with these PRINCIPLE problems shall be recommended for CANCELLATION.*

Lampiran 5.2. Contoh Kajian Perda dari Kota Surabaya

| NO. | PRODUK HUKUM DAERAH (1)                                                                                                       | TINJAUAN                                                                                                                                                                                                                                                                                                                                                                                                                                                                         |                                                                                                                                                                                                                                                                                                                                                                                                                                                                                                                                                                            |                                                                                                                                                                                                                                                                                                                                                                                                                                                                | REKOMENDASI (5)                                                                                                                                                                                                                                                                                                                                                                                                                                                                                                                                                                                                                                                                      | KETERANGAN (6)                                            |
|-----|-------------------------------------------------------------------------------------------------------------------------------|----------------------------------------------------------------------------------------------------------------------------------------------------------------------------------------------------------------------------------------------------------------------------------------------------------------------------------------------------------------------------------------------------------------------------------------------------------------------------------|----------------------------------------------------------------------------------------------------------------------------------------------------------------------------------------------------------------------------------------------------------------------------------------------------------------------------------------------------------------------------------------------------------------------------------------------------------------------------------------------------------------------------------------------------------------------------|----------------------------------------------------------------------------------------------------------------------------------------------------------------------------------------------------------------------------------------------------------------------------------------------------------------------------------------------------------------------------------------------------------------------------------------------------------------|--------------------------------------------------------------------------------------------------------------------------------------------------------------------------------------------------------------------------------------------------------------------------------------------------------------------------------------------------------------------------------------------------------------------------------------------------------------------------------------------------------------------------------------------------------------------------------------------------------------------------------------------------------------------------------------|-----------------------------------------------------------|
|     |                                                                                                                               | Bentuk / Obyek (2)                                                                                                                                                                                                                                                                                                                                                                                                                                                               | Harmonisasi dengan Produk Hukum yang Lebih Tinggi atau Produk Hukum lainnya (3)                                                                                                                                                                                                                                                                                                                                                                                                                                                                                            | Kepentingan Umum (4)                                                                                                                                                                                                                                                                                                                                                                                                                                           |                                                                                                                                                                                                                                                                                                                                                                                                                                                                                                                                                                                                                                                                                      |                                                           |
| 142 | Perda Kota Surabaya (Propinsi Jawa Timur) No.16 Tahun 1998 tentang Pajak Penerangan Jalan (Mulai berlaku tgl 12 Oktober 1998) | Pajak Daerah yang dikenakan kepada orang pribadi atau badan atas setiap penggunaan tenaga listrik di wilayah daerah yang tersedia penerangan jalan yang rekeningnya dibayar oleh pemerintah Daerah (psl 2, 3 & 4). Tarif pajak (dasar pengenaannya adalah Nilai Jual tenaga listrik) ditetapkan: 1) Penggunaan listrik PLN bukan untuk industri sebesar 6%, 2) Penggunaan listrik PLN untuk industri sebesar 3%, 3) Penggunaan listrik bukan listrik PLN sebesar 9% (psl 5 & 6). | <ol style="list-style-type: none"> <li>1. Salah satu landasan hukum (konsideran) yang digunakan Perda ini, yaitu UU No.5/1974 tentang Pokok-pokok Pemerintahan Daerah telah dinyatakan tidak berlaku lagi seiring diberlakukannya UU No.22/1999 tentang Pemerintahan Daerah (psl 131 UU No.22/1999).</li> <li>2. Meskipun belum menjadikan UU No.34/2000 sebagai salah satu landasan hukumnya, sebagai Perda yang mengatur Pajak, Perda ini telah memenuhi kelengkapan yuridis fomal Peraturan Daerah tentang Pajak berdasarkan Pasal 4 ayat (3) UU No.34/2000.</li> </ol> | Karena masih menggunakan PP No.19/1997 tentang Pajak Daerah sebagai salah satu landasan hukumnya, penetapan tarif Pajak Penerangan Jalan untuk industri tidak sesuai dengan Pasal 60 ayat (3) PP No.65/2001 tentang Pajak Daerah, dimana Nilai Jual Tenaga Listrik untuk kegiatan industri dan sejenisnya ditetapkan 30%; sehingga seharusnya tarif Pajak Penerangan jalan untuk industri dalam Perda ini adalah 3% dan 9% dari 30% Nilai Jual tenaga listrik. | <p><b>Direvisi.</b></p> <ol style="list-style-type: none"> <li>1. Menjadikan UU No.22/1999 tentang Pemerintahan Daerah sebagai landasan hukum (konsideran) Perda ini.</li> <li>2. Menjadikan UU No.34 Tahun 2000 tentang Perubahan Atas UU No.18 tahun 1997 tentang Pajak Daerah dan Retribusi Daerah sebagai salah satu landasan hukum (konsideran) Perda ini.</li> <li>3. Menjadikan PP No.65/2001 tentang Pajak Daerah sebagai salah satu landasan hukum (konsideran) Perda ini dan merevisi ketentuan tarif Pajak Penerangan jalan untuk industri menjadi 3% dan 9% dari 30% Nilai Jual tenaga listrik, sesuai dengan ketentuan pada Pasal 60 ayat (3) PP No.65/2001.</li> </ol> | Masih berlaku (sejak diundangkan tanggal 12 Oktober 1998) |



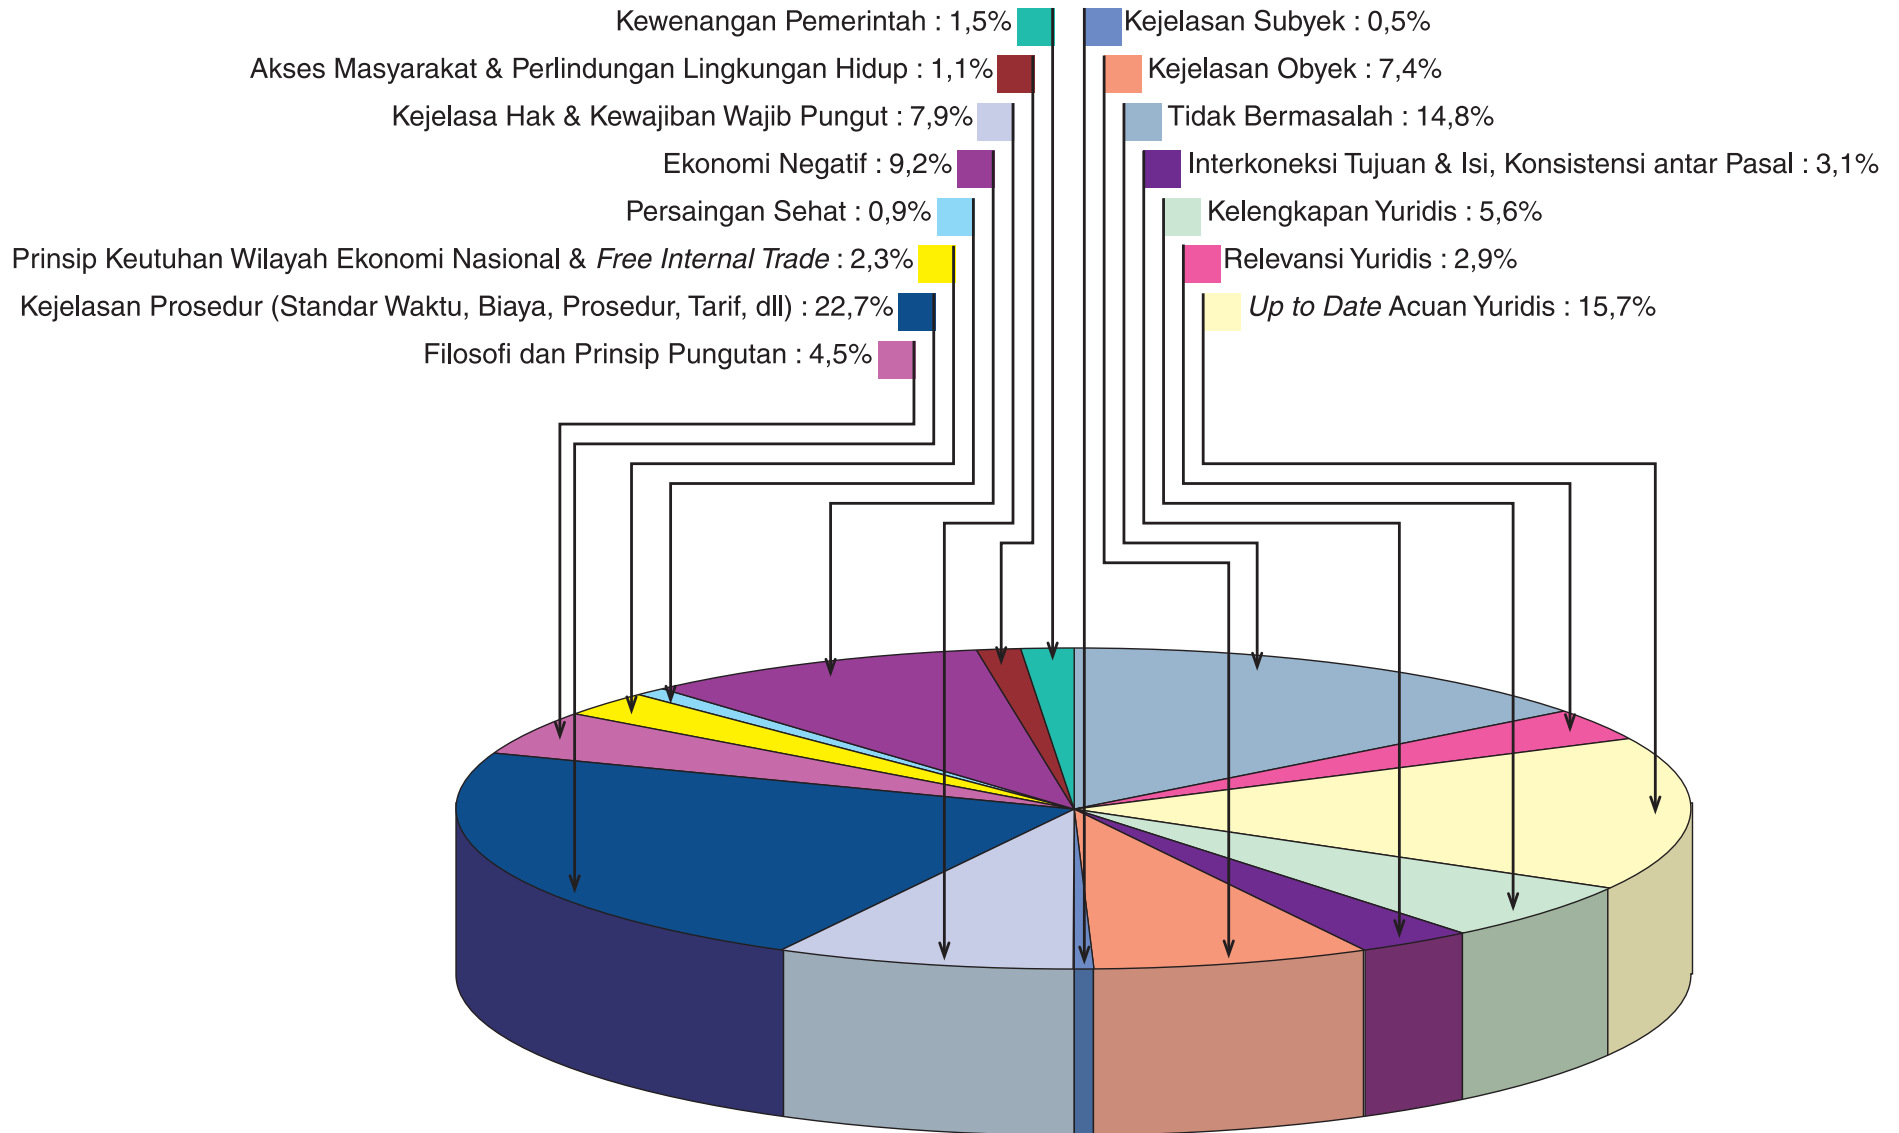





| NO. | PROPINSI | KABUPATEN/KOTA       | No | PERDA ATAU SK KEPDA                                      | JENIS KEBERMASALAHAN |   |   |   |   |   |   |   |   |   |    |    |    |    |    |   |   |   |
|-----|----------|----------------------|----|----------------------------------------------------------|----------------------|---|---|---|---|---|---|---|---|---|----|----|----|----|----|---|---|---|
|     |          |                      |    |                                                          | 0                    | 1 | 2 | 3 | 4 | 5 | 6 | 7 | 8 | 9 | 10 | 11 | 12 | 13 | 14 |   |   |   |
| 11  | SUMUT    | Kota Tebing Tinggi   | 61 | P.03/01 (Retri peruntukan penggunaan tanah)              | ✓                    |   |   |   |   |   |   |   |   |   |    |    |    |    |    |   |   |   |
|     |          |                      | 62 | P.04/01 (Sumb pihak ketiga kepada Pemkot Tjg Balai)      |                      |   |   |   |   |   |   |   |   |   |    |    |    |    |    |   | ✓ |   |
|     |          |                      | 63 | P.06/01 (Retri tambat kapal/boat)                        | ✓                    |   |   |   |   |   |   |   |   |   |    |    |    |    |    |   |   |   |
|     |          |                      | 64 | P.07/98 (Pajak pengmln & pengolhn galian C)              |                      |   | ✓ | ✓ |   |   |   |   |   |   |    |    |    |    |    |   |   |   |
|     |          |                      | 65 | P.18/98 (Retri pasar grosir atau pertokoan)              |                      |   | ✓ | ✓ |   |   |   |   |   |   |    | ✓  |    |    |    |   |   |   |
|     |          |                      | 66 | P.21/98 (Retri rumah potong hewan)                       |                      |   | ✓ |   |   |   |   |   |   |   |    | ✓  |    |    |    |   |   | ✓ |
|     |          |                      | 67 | P.23/98 (Retri izin peruntukan penggnan tanah)           |                      |   | ✓ |   |   |   |   |   |   |   |    | ✓  |    |    |    |   |   |   |
| 12  | SUMBAR   | Kab. Pesisir Sel     | 68 | P.26/98 (RIG)                                            |                      |   | ✓ |   |   |   |   |   |   |   |    |    |    |    |    |   |   |   |
|     |          |                      | 69 | P.15/01 (PPJ)                                            |                      |   |   |   |   |   |   |   |   |   |    |    |    |    |    |   | ✓ |   |
| 13  | SUMBAR   | Kab. Sawahlunto      | 70 | P.13/01 (Retri pemeliharaan jalan)                       |                      |   |   |   | ✓ |   |   |   | ✓ | ✓ |    |    |    |    |    | ✓ |   |   |
|     |          |                      | 71 | P.12/00 (Retri terminal)                                 | ✓                    |   |   |   |   |   |   |   |   |   |    |    |    |    |    |   |   |   |
|     |          |                      | 72 | P.14/00 (Pengelolaan dan pengusaha sarang burung wallet) |                      | ✓ |   |   | ✓ |   |   |   |   |   |    |    |    |    |    |   |   |   |
|     |          |                      | 73 | P.10/00 (PPJ)                                            |                      |   |   |   |   |   |   |   |   |   |    |    |    |    |    |   |   | ✓ |
|     |          |                      | 74 | P.13/00 (Perlengkapan jalan)                             | ✓                    |   |   |   |   |   |   |   |   |   |    |    |    |    |    |   |   |   |
|     |          |                      | 75 | P.17/01 (Pengelolaan dan pengusaha pertambangan)         |                      |   |   |   |   |   |   |   |   |   |    |    |    |    |    |   |   | ✓ |
|     |          |                      | 76 | P.09/00 (Retri pasar)                                    |                      |   |   |   |   |   |   |   |   |   |    |    |    |    |    |   |   | ✓ |
| 14  | SUMBAR   | Kota Padang          | 77 | P.08/00 (RIG)                                            |                      |   |   |   |   | ✓ |   |   | ✓ |   |    |    |    |    |    |   |   |   |
|     |          |                      | 78 | P.27/97 (Pajak bahan galian C)                           |                      |   |   | ✓ |   |   |   |   |   |   |    |    |    |    |    |   | ✓ |   |
|     |          |                      | 79 | P.28/97 (Pajak pemftn air bwh tanah & air permukaan)     |                      |   |   | ✓ |   |   |   |   |   |   |    |    |    |    |    |   |   | ✓ |
|     |          |                      | 80 | P.04/00 (Retri IMB)                                      |                      |   |   |   |   |   | ✓ |   |   |   | ✓  |    |    |    |    |   |   |   |
|     |          |                      | 81 | P.05/98 (PPJ)                                            |                      |   |   | ✓ |   |   |   |   |   |   | ✓  |    |    |    |    |   |   |   |
|     |          |                      | 82 | P.03/98 (Pajak hiburan)                                  |                      |   |   | ✓ |   |   |   |   |   |   |    |    |    |    |    |   |   |   |
|     |          |                      | 83 | P.06/98 (Pajak reklame)                                  |                      |   |   | ✓ |   |   |   |   |   |   |    |    |    |    |    |   |   |   |
|     |          |                      | 84 | P.07/98 (Retri rumah potong hewan)                       |                      |   |   | ✓ |   |   |   |   |   |   |    |    |    |    |    |   |   |   |
| 15  | SUMBAR   | Kota Sawahlunto      | 85 | P.11/01 (Retri izin trayek)                              | ✓                    |   |   |   |   |   |   |   |   |   |    |    |    |    |    |   |   |   |
|     |          |                      | 86 | P.05/02 (Retri IMB)                                      |                      |   |   |   |   |   |   |   |   |   |    |    |    |    |    |   | ✓ |   |
| 16  | R I A U  | Kab. Bengkalis       | 87 | P.06/02 (Retri persampahan)                              | ✓                    |   |   |   |   |   |   |   |   |   |    |    |    |    |    |   |   |   |
|     |          |                      | 88 | P.45/01 (Pajak reklame)                                  |                      |   |   |   | ✓ |   |   |   |   |   |    |    |    |    |    |   |   |   |
|     |          |                      | 89 | P.40/01 (Pengambilan galian C)                           | ✓                    |   |   |   |   |   |   |   |   |   |    |    |    |    |    |   |   |   |
|     |          |                      | 90 | P.43/01 (Pajak restoran)                                 |                      |   |   |   |   |   | ✓ |   |   |   |    |    |    |    |    |   |   |   |
|     |          |                      | 91 | P.44/01 (Pajak hiburan)                                  |                      |   |   |   |   |   | ✓ |   |   |   |    |    |    |    |    |   |   |   |
|     |          |                      | 92 | P.41/01 (PPJ)                                            |                      |   |   |   |   |   |   |   |   |   |    | ✓  |    |    |    |   |   |   |
|     |          |                      | 93 | P.20/00 (Pengelolaan SD perikanan)                       |                      |   |   |   |   |   |   |   |   |   |    |    |    |    |    |   |   | ✓ |
|     |          |                      | 94 | P.27/01 (Pembentukan OTK kantor pengel pasar)            | ✓                    |   |   |   |   |   |   |   |   |   |    |    |    |    |    |   |   |   |
| 17  | R I A U  | Kab. Indragiri Hilir | 95 | P.32/01 (Pembentk OTK penanaman modal)                   | ✓                    |   |   |   |   |   |   |   |   |   |    |    |    |    |    |   |   |   |
|     |          |                      | 96 | P.14/01 (Energi & ketenagalistrikan)                     | ✓                    |   |   |   |   |   |   |   |   |   |    |    |    |    |    |   |   |   |
| 18  | R I A U  | Kab. Kampar          | 97 | P.08/98 (Retri pasar grosir atau pertokoan)              |                      |   | ✓ | ✓ |   | ✓ |   |   | ✓ |   |    |    |    |    |    |   |   |   |





| NO. | PROPINSI | KABUPATEN/KOTA   | No  | PERDA ATAU SK KEPDA                                                                | JENIS KEBERMASALAHAN |   |   |   |   |   |   |   |   |   |    |    |    |    |    |   |   |
|-----|----------|------------------|-----|------------------------------------------------------------------------------------|----------------------|---|---|---|---|---|---|---|---|---|----|----|----|----|----|---|---|
|     |          |                  |     |                                                                                    | 0                    | 1 | 2 | 3 | 4 | 5 | 6 | 7 | 8 | 9 | 10 | 11 | 12 | 13 | 14 |   |   |
|     |          |                  | 134 | P.19/01 (IPK pada hutan rkyt atau tanah milik)                                     |                      |   |   |   |   | ✓ |   | ✓ |   |   |    |    |    |    |    |   |   |
|     |          |                  | 135 | P.20/01 (Izin usaha perkebunan)                                                    |                      |   |   |   |   | ✓ |   |   | ✓ |   |    |    |    |    |    |   |   |
|     |          |                  | 136 | P.21/01 (Izin usaha indtri hasil tman perkebunan)                                  |                      |   |   |   |   | ✓ |   |   |   |   |    |    |    |    |    |   |   |
| 25  | SUMSEL   | Kab. Musi Banyu  | 137 | P.06/99 (Retri rumah potong hewan)                                                 |                      |   |   |   |   |   |   |   |   | ✓ |    |    |    |    |    |   |   |
|     |          |                  | 138 | P.08/99 (Retri izin trayek)                                                        |                      |   |   |   |   |   |   |   |   |   | ✓  |    |    |    |    |   |   |
|     |          |                  | 139 | P.09/99 (RIG)                                                                      |                      |   |   |   |   |   |   |   |   |   |    | ✓  |    |    |    |   |   |
| 26  | SUMSEL   | Kab. Musi Rawas  | 140 | P.18/99 (Retribusi pasar)                                                          | ✓                    |   |   |   |   |   |   |   |   |   |    |    |    |    |    |   |   |
|     |          |                  | 141 | P.05/00 (Retri pasar)                                                              |                      |   |   |   | ✓ |   |   |   |   |   |    |    |    |    |    |   |   |
|     |          |                  | 142 | P.21/01 (Pajak pengusahaan sarang burung walet)                                    |                      |   |   |   |   |   |   |   |   |   | ✓  |    |    |    |    |   |   |
|     |          |                  | 143 | P.19/01 (Pajak restoran)                                                           | ✓                    |   |   |   |   |   |   |   |   |   |    |    |    |    |    |   |   |
| 27  | SUMSEL   | Kab. OKI         | 144 | P.18/01 (Pajak hotel)                                                              | ✓                    |   |   |   |   |   |   |   |   |   |    |    |    |    |    |   |   |
|     |          |                  | 145 | P.11/01 (Pengelln & pembanftn SD kelautan, perikanan dan lingk perairan)           |                      |   |   |   |   |   |   |   |   |   |    |    |    | ✓  |    |   |   |
|     |          |                  | 146 | P.14/01 (Meterai Daerah)                                                           |                      |   |   |   |   |   |   |   |   |   |    |    |    |    | ✓  |   | ✓ |
|     |          |                  | 147 | P.15/01 (Pajak perusahaan industri daerah)                                         |                      |   |   |   |   |   |   |   |   |   |    |    |    |    | ✓  |   |   |
|     |          |                  | 148 | P.16/01 (Izin TDP, izin usaha industri, izin tanda daftar gudang)                  |                      |   |   |   |   |   |   |   |   |   |    |    |    |    | ✓  |   |   |
|     |          |                  | 149 | P.25/01 (Perizinan pmftn hasil hutan pada hutan produksi alam)                     |                      |   |   |   |   |   |   | ✓ |   | ✓ |    |    |    |    |    | ✓ |   |
|     |          |                  | 150 | P.26/01 Pengtn kayu & bukan kayu pada hutan rakyat, kayu cerucuk & penimbunan kayu |                      |   |   |   |   |   |   |   |   |   |    |    |    |    | ✓  |   |   |
|     |          |                  | 151 | P.28/01 (Usaha pertambangan umum mengenai pajak pembn dan penglln)                 |                      |   |   |   |   |   |   | ✓ |   |   |    |    |    |    |    |   | ✓ |
|     |          |                  | 152 | P.12/01 (Tanda pencatatan kegiatan perikanan)                                      |                      |   |   |   |   |   |   |   |   |   |    |    |    |    |    | ✓ |   |
|     |          |                  | 153 | P.13/01 (Pungutan pmnftn SD ikan)                                                  |                      |   |   |   |   |   |   |   |   |   |    |    |    |    |    | ✓ |   |
|     |          |                  | 154 | P.19/01 (Retri IPHHK pada hutan rakyat)                                            |                      |   |   |   |   |   | ✓ | ✓ |   |   |    |    |    |    |    |   |   |
| 28  | SUMSEL   | Kota Palembang   | 155 | P.20/01 (Retri izin lalin hasil buah-buahan & buah kelapa sawit)                   |                      |   |   |   |   |   |   |   |   |   |    |    | ✓  |    |    |   |   |
|     |          |                  | 156 | P.22/01 (Retribusi pembinaan perusahaan dan ketenagakerjaan)                       |                      |   |   |   |   |   |   |   |   |   |    |    |    | ✓  |    |   |   |
|     |          |                  | 157 | P.20/01 (Pungutan biaya administrasi (leges)                                       | ✓                    |   |   |   |   |   |   |   |   |   |    |    |    |    |    |   |   |
|     |          |                  | 158 | P.19/01 (Pengusahaan dan retribusi perpasaran swasta).                             |                      |   |   |   |   |   |   |   |   |   |    |    |    |    |    | ✓ |   |
|     |          |                  | 159 | P.12/01 (Izin peruntukan dan penggunaan tanah)                                     |                      |   |   |   |   |   |   |   |   |   |    |    |    |    |    | ✓ |   |
|     |          |                  | 160 | P.21/02 (Pembinaan & retri jasa angkutan laut, sungai & penyeberangan)             | ✓                    |   |   |   |   |   |   |   |   |   |    |    |    |    |    |   |   |
|     |          |                  | 161 | P.20/02 (Pajak parkir)                                                             | ✓                    |   |   |   |   |   |   |   |   |   |    |    |    |    |    |   |   |
|     |          |                  | 162 | P.19/02 (Retri parkir)                                                             |                      |   |   |   | ✓ |   |   |   |   |   |    |    |    |    |    |   |   |
| 29  | BABEL    | Kota Bangka      | 163 | P.15/02 (pembinaan & retri di bidang industri)                                     |                      |   |   |   |   |   |   |   |   |   |    |    |    | ✓  |    |   |   |
|     |          |                  | 164 | P.14/02 (Retri IMB)                                                                |                      |   |   |   |   |   |   |   |   |   |    |    |    |    | ✓  |   |   |
| 30  | BABEL    | Kota Pangkal Png | 165 | P.06/01 (Pengelolaan pertambangan umum)                                            |                      |   |   |   |   |   |   |   |   |   |    |    |    | ✓  |    |   |   |
|     |          |                  | 166 | P.02/99 (Retri pasar)                                                              | ✓                    |   |   |   |   |   |   |   |   |   |    |    |    |    |    |   |   |
|     |          |                  | 167 | P.10/00 (Penerimaan sumb pihak ketiga)                                             |                      |   |   |   |   |   |   |   |   |   |    |    |    |    |    | ✓ |   |
|     |          |                  | 168 | P.05/01 (Retri izin tempat usaha)                                                  |                      |   |   |   |   |   |   | ✓ |   |   |    |    |    |    |    |   |   |
|     |          |                  | 169 | P.05/02 (Retri penerbitan surat izin usaha perdgn)                                 |                      |   |   |   |   |   |   |   |   |   |    |    |    | ✓  |    |   |   |

| NO. | PROPINSI                                                             | KABUPATEN/KOTA     | No  | PERDA ATAU SK KEPDA                                                               | JENIS KEBERMASALAHAN |     |                                                                              |   |   |   |   |   |   |   |    |    |    |    |    |   |  |  |  |
|-----|----------------------------------------------------------------------|--------------------|-----|-----------------------------------------------------------------------------------|----------------------|-----|------------------------------------------------------------------------------|---|---|---|---|---|---|---|----|----|----|----|----|---|--|--|--|
|     |                                                                      |                    |     |                                                                                   | 0                    | 1   | 2                                                                            | 3 | 4 | 5 | 6 | 7 | 8 | 9 | 10 | 11 | 12 | 13 | 14 |   |  |  |  |
| 31  | BENGKULU                                                             | Kab. Bengkulu Sel  | 170 | P.07/02 (Retri penerbitan surat izin usaha industri)                              |                      |     |                                                                              |   |   | ✓ |   |   | ✓ |   |    |    |    |    |    |   |  |  |  |
|     |                                                                      |                    | 171 | P.09/00 (Sumbangan Wajib Pengusahaan Sarang burung walet dan pelestarian)         |                      |     |                                                                              | ✓ |   |   |   |   |   |   |    |    | ✓  |    |    |   |  |  |  |
|     |                                                                      |                    | 172 | P.08/01 (Retri produksi kayu atas izin pemnftn hasil hutan kayu pada tanah milik) |                      |     |                                                                              |   |   |   |   |   |   |   | ✓  |    |    |    |    |   |  |  |  |
|     |                                                                      |                    | 173 | P.09/01 (Izin pemanfaatan kayu)                                                   |                      |     |                                                                              |   |   |   |   |   |   |   | ✓  |    |    |    |    |   |  |  |  |
|     |                                                                      |                    | 174 | P.10/01 (Retri izin kepemilikan gergaji rantai)                                   |                      |     |                                                                              |   |   |   |   |   |   |   |    |    |    | ✓  |    | ✓ |  |  |  |
|     |                                                                      |                    | 175 | P.05/00 (Pedomaan pengelolaan & pengusahaan sarang burung walet)                  |                      |     |                                                                              |   |   |   |   |   |   |   |    |    |    | ✓  |    |   |  |  |  |
|     |                                                                      |                    | 176 | P.21/00 (Retri kartu ternak)                                                      |                      |     |                                                                              |   |   |   |   |   |   | ✓ |    |    |    | ✓  |    |   |  |  |  |
|     |                                                                      |                    | 177 | P.22/00 (Retri pengeluaran hewan ternak ke luar Kab. Bengkulu Selatan)            |                      |     |                                                                              |   |   |   |   |   |   |   |    |    | ✓  |    |    | ✓ |  |  |  |
|     |                                                                      |                    | 178 | P.23/00 (Retri pemeriksaan hewan ternak & bahan asal hewan ternak ke luar daerah) |                      |     |                                                                              |   |   |   |   |   |   |   |    |    |    | ✓  |    | ✓ |  |  |  |
|     |                                                                      |                    | 179 | P.24/00 (Retri hasil hutan ikutan)                                                |                      |     |                                                                              |   |   |   |   |   |   | ✓ |    | ✓  |    |    |    |   |  |  |  |
|     |                                                                      |                    | 180 | P.25/00 (Retri membawa hasil perkebunan ke luar daerah)                           |                      |     |                                                                              |   |   |   |   |   |   |   |    | ✓  | ✓  |    |    |   |  |  |  |
|     |                                                                      |                    | 181 | P.26/00 (Retri produksi usaha pemerintah Kab. Bengkulu Selatan)                   | ✓                    |     |                                                                              |   |   |   |   |   |   |   |    |    |    |    |    |   |  |  |  |
|     |                                                                      |                    | 182 | P.07/01 (Izin pemanfaatan kayu pada tanah milik)                                  |                      |     |                                                                              |   |   |   | ✓ |   |   |   |    |    |    |    |    |   |  |  |  |
|     |                                                                      |                    | 32  | BENGKULU                                                                          | Kota Bengkulu        | 183 | P.06/02 (Retri izin usaha peternakan & peredaran sarana produksi peternakan) |   |   |   |   |   |   |   |    |    | ✓  |    |    |   |  |  |  |
| 184 | P.05/02 (Retri izin usaha pemotongan hewan & penjualan hasil ternak) |                    |     |                                                                                   |                      |     |                                                                              |   |   |   |   |   |   |   | ✓  |    |    |    |    |   |  |  |  |
| 185 | P.09/02 (RIG)                                                        | ✓                  |     |                                                                                   |                      |     |                                                                              |   |   |   |   |   |   |   |    |    |    |    |    |   |  |  |  |
| 186 | P.08/02 (Retri izin usaha perdagangan)                               |                    |     |                                                                                   |                      |     |                                                                              |   |   |   |   |   |   |   | ✓  | ✓  |    |    |    |   |  |  |  |
| 187 | P.10/02 (Retri izin tempat usaha)                                    |                    |     |                                                                                   |                      |     |                                                                              |   |   |   |   |   |   |   |    | ✓  |    |    |    |   |  |  |  |
| 188 | P.02/02 (Pajak hiburan)                                              |                    |     |                                                                                   |                      |     |                                                                              |   |   |   | ✓ |   |   |   |    |    |    |    |    |   |  |  |  |
| 189 | P.14/02 (Retri surat izin usaha jasa konstruksi)                     |                    |     |                                                                                   |                      |     |                                                                              |   |   |   |   |   |   | ✓ |    |    |    |    |    |   |  |  |  |
| 33  | LAMPUNG                                                              | Kab. Lampung Brt   | 190 | P.04/98 (Pajak hotel dan rest)                                                    |                      |     | ✓                                                                            |   |   |   |   |   |   |   |    |    |    |    |    |   |  |  |  |
|     |                                                                      |                    | 191 | P.06/98 (Pajak hiburan)                                                           |                      |     | ✓                                                                            |   |   |   |   |   |   |   |    |    |    |    |    |   |  |  |  |
|     |                                                                      |                    | 192 | P.13/98 (Retri tmp penginapan)                                                    |                      |     | ✓                                                                            |   |   |   |   |   |   |   |    |    |    |    |    |   |  |  |  |
|     |                                                                      |                    | 193 | P.15/98 (Retri izin perutnukan tanah)                                             |                      |     | ✓                                                                            |   |   |   |   |   |   |   |    |    |    |    |    | ✓ |  |  |  |
|     |                                                                      |                    | 194 | P.07/98 (Pengambilan galian C)                                                    |                      |     | ✓                                                                            |   |   |   |   |   |   |   |    |    |    |    |    |   |  |  |  |
|     |                                                                      |                    | 195 | P. 02/98 (Retri pasar grosir atau pertokoan)                                      |                      |     | ✓                                                                            |   |   |   |   |   |   |   |    | ✓  |    |    |    |   |  |  |  |
|     |                                                                      |                    | 196 | P.07/98 (Pajak pengmln & pengolhn galian C)                                       |                      |     | ✓                                                                            |   |   |   |   |   |   |   |    |    |    |    |    |   |  |  |  |
|     |                                                                      |                    | 197 | P.24/98 (Pasar)                                                                   |                      |     |                                                                              |   |   | ✓ |   |   |   |   |    |    |    |    |    |   |  |  |  |
|     |                                                                      |                    | 198 | P.07/01 (Retri tandan buah segar kelapa sawit)                                    |                      |     |                                                                              |   |   |   | ✓ |   |   |   |    |    |    |    |    | ✓ |  |  |  |
| 34  | LAMPUNG                                                              | Kab. Lampung Sel   | 199 | P.05/98 & SK 06/00 (Pajak reklame)                                                |                      |     |                                                                              |   |   | ✓ |   |   |   | ✓ |    |    |    |    |    |   |  |  |  |
| 35  | LAMPUNG                                                              | Kab. Lampung Timur | 200 | P. 05/00 (Pajak penfmbln & penglhn galian C)                                      |                      |     |                                                                              |   |   | ✓ |   |   |   |   |    |    |    |    |    |   |  |  |  |
|     |                                                                      |                    | 201 | P.11/00 (RIG)                                                                     |                      |     |                                                                              |   |   |   |   |   |   |   |    |    | ✓  |    |    |   |  |  |  |
|     |                                                                      |                    | 202 | P.15/00 (Retri pasar grosir atau pertokoan)                                       |                      |     |                                                                              |   |   |   |   |   |   |   |    |    | ✓  |    |    |   |  |  |  |

| NO. | PROPINSI | KABUPATEN/KOTA   | No  | PERDA ATAU SK KEPDA                                                                                                                                          | JENIS KEBERMASALAHAN |   |   |   |   |   |   |   |   |   |    |    |    |    |    |
|-----|----------|------------------|-----|--------------------------------------------------------------------------------------------------------------------------------------------------------------|----------------------|---|---|---|---|---|---|---|---|---|----|----|----|----|----|
|     |          |                  |     |                                                                                                                                                              | 0                    | 1 | 2 | 3 | 4 | 5 | 6 | 7 | 8 | 9 | 10 | 11 | 12 | 13 | 14 |
|     |          |                  | 203 | P.07/00 (Pajak hiburan)                                                                                                                                      |                      |   | ✓ |   |   | ✓ |   |   |   |   |    |    |    |    |    |
|     |          |                  | 204 | P.06/00 (PHR)                                                                                                                                                |                      |   | ✓ |   |   |   |   |   |   |   |    |    |    |    |    |
|     |          |                  | 205 | P.09/00 (Retri izin trayek)                                                                                                                                  |                      |   | ✓ |   |   |   |   |   |   |   |    |    |    |    |    |
|     |          |                  | 206 | P.10/00 (Retri atas izin penggunaan tanah)                                                                                                                   |                      |   |   |   |   |   |   |   |   |   |    | ✓  |    |    |    |
|     |          |                  | 207 | P.16/00 (Retri pasar)                                                                                                                                        |                      |   | ✓ |   |   |   |   |   |   |   |    |    |    |    |    |
|     |          |                  | 208 | P.20/00 (Retri rumah potong hewan)                                                                                                                           |                      |   | ✓ |   |   |   |   |   |   |   |    |    |    |    |    |
| 36  | LAMPUNG  | Kota Bandar Lamp | 209 | P.06/00 (Retri terminal)                                                                                                                                     | ✓                    |   |   |   |   |   |   |   |   |   |    |    |    |    |    |
|     |          |                  | 210 | P.10/00 (PPJ)                                                                                                                                                |                      |   |   |   |   |   |   |   |   |   | ✓  |    |    |    |    |
| 37  | BANTEN   | Kab. Lebak       | 211 | P.29/01 & SK 06/01 Retri pemeriksaan kesehatan hewan, hasil ternak & hasil ikutannya di luar rmh ptg hewan yang dikeluarkan & dimasukan dari & ke Kab. Lebak |                      |   |   |   |   |   |   |   |   |   |    |    |    | ✓  |    |
|     |          |                  | 212 | SK 11/00 (Penetapan biaya penerbitan surat izin usaha jasa konstruksi)                                                                                       |                      |   |   |   |   |   |   |   |   |   | ✓  |    |    |    |    |
|     |          |                  | 213 | SK 20/01 (Petunjuk pelaksanaan pemberian izin bagi perusahaan dalam rangka penanaman modal)                                                                  | ✓                    |   |   |   |   |   |   |   |   |   |    |    |    |    |    |
| 38  | BANTEN   | Kab. Serang      | 214 | P.09/01 (Pengel tempat pelelangan ikan)                                                                                                                      |                      |   |   |   |   |   | ✓ |   |   |   |    |    |    |    |    |
|     |          |                  | 215 | P.07/01 (Retribusi Kayu)                                                                                                                                     |                      |   |   |   |   |   | ✓ |   | ✓ |   |    |    |    |    |    |
|     |          |                  | 216 | P.05/02 (Pajak restoran)                                                                                                                                     |                      |   |   |   |   |   | ✓ |   |   |   |    |    |    |    |    |
|     |          |                  | 217 | P.04/02 (Pajak hotel)                                                                                                                                        |                      |   |   |   |   |   | ✓ |   |   |   |    |    |    |    |    |
|     |          |                  | 218 | P.08/01 (Retri pemrksaan hewan, ternak, hasil ternak dan hasil ikutannya)                                                                                    |                      |   |   |   |   |   |   |   |   |   |    |    |    |    | ✓  |
| 39  | BANTEN   | Kab. Tangerang   | 219 | P.03/00 (Retri biaya cetak peta)                                                                                                                             | ✓                    |   |   |   |   |   |   |   |   |   |    |    |    |    |    |
|     |          |                  | 220 | P.01/00 & SK 08/00 (RIG)                                                                                                                                     |                      |   |   |   | ✓ |   |   |   |   | ✓ | ✓  |    |    |    |    |
|     |          |                  | 221 | P.06/96 (Ketent pengenaan retri plynan perumahan thd penggn rumah oleh bukan pemilik)                                                                        |                      |   | ✓ | ✓ |   |   |   |   |   | ✓ |    |    |    |    |    |
|     |          |                  | 222 | P.05/99 (PHR)                                                                                                                                                | ✓                    |   |   |   |   |   |   |   |   |   |    |    |    |    |    |
|     |          |                  | 223 | P.02/01 (Penyelnggran lalin)                                                                                                                                 | ✓                    |   |   |   |   |   |   |   |   |   |    |    |    |    |    |
|     |          |                  | 224 | P.01/01 (Retribusi Pelayanan Kesehatan Di Pusat Kesehatan Masyarakat)                                                                                        | ✓                    |   |   |   |   |   |   |   |   |   |    |    |    |    |    |
|     |          |                  | 225 | P.04/00 (Retri Di Tepi Jalan Umum)                                                                                                                           |                      |   |   | ✓ |   |   |   |   |   |   |    |    |    |    |    |
|     |          |                  | 226 | P.02/00 (Retribusi Terminal)                                                                                                                                 |                      |   |   | ✓ |   |   |   |   |   |   |    |    |    |    |    |
|     |          |                  | 227 | P.06/99 (PPJ)                                                                                                                                                |                      |   |   | ✓ |   |   |   |   |   |   |    |    |    | ✓  |    |
|     |          |                  | 228 | P.07/99 (Retri izin trayek)                                                                                                                                  |                      |   |   | ✓ |   |   |   |   |   |   |    |    |    |    |    |
|     |          |                  | 229 | P.03/99 (Pajak reklame)                                                                                                                                      |                      |   |   | ✓ |   |   |   |   |   |   |    |    |    |    |    |
|     |          |                  | 230 | P.04/99 (Pajak hiburan)                                                                                                                                      |                      |   |   | ✓ |   |   |   |   |   |   |    |    |    |    |    |
|     |          |                  | 231 | P.06/00 (Kerjasama Pemerintah Daerah Dengan Badan Usaha Swasta Dalam Pembangunan Dan Atau Pengelolaan Potensi Daerah)                                        | ✓                    |   |   |   |   |   |   |   |   |   |    |    |    |    |    |
| 40  | BANTEN   | Kota Tangerang   | 232 | P.19/96 (Retri pasar)                                                                                                                                        |                      |   |   | ✓ |   |   |   |   |   |   |    |    |    |    |    |
|     |          |                  | 233 | P.08/99 (Pajak reklame)                                                                                                                                      |                      |   |   |   |   |   |   |   |   |   |    |    |    |    | ✓  |
|     |          |                  | 234 | P.09/00 (retri rmh ptng hewan& tata niaga ternak)                                                                                                            |                      |   |   |   |   |   |   |   |   |   |    |    |    |    | ✓  |

| NO. | PROPINSI                                       | KABUPATEN/KOTA | No  | PERDA ATAU SK KEPDA                                                                                       | JENIS KEBERMASALAHAN |   |   |   |   |   |   |   |   |   |    |    |    |    |    |  |  |   |   |  |
|-----|------------------------------------------------|----------------|-----|-----------------------------------------------------------------------------------------------------------|----------------------|---|---|---|---|---|---|---|---|---|----|----|----|----|----|--|--|---|---|--|
|     |                                                |                |     |                                                                                                           | 0                    | 1 | 2 | 3 | 4 | 5 | 6 | 7 | 8 | 9 | 10 | 11 | 12 | 13 | 14 |  |  |   |   |  |
|     |                                                |                | 235 | P.10/99 (PPJ)                                                                                             |                      |   | ✓ |   |   |   |   |   | ✓ |   |    |    |    |    |    |  |  |   |   |  |
|     |                                                |                | 236 | P.02/01 (Pajak Atas Penyelenggaraan Parkir Swasta)                                                        |                      |   |   |   |   |   | ✓ |   |   |   |    |    |    |    |    |  |  |   |   |  |
|     |                                                |                | 237 | P.07/00 (Retri terminal)                                                                                  |                      |   | ✓ |   |   |   |   |   |   |   |    |    |    |    |    |  |  |   |   |  |
|     |                                                |                | 238 | P.09/99 (PHR)                                                                                             |                      |   | ✓ |   |   |   |   |   |   |   |    |    |    |    |    |  |  |   |   |  |
|     |                                                |                | 239 | P.11/00 (Pajak hiburan)                                                                                   |                      |   | ✓ |   |   |   |   | ✓ |   |   |    |    |    |    |    |  |  |   |   |  |
|     |                                                |                | 240 | P.19/96 (Retribusi Pasar Tempat Perdagangan Umum Dan Jasa)P.22/00                                         |                      |   | ✓ |   |   |   |   |   |   |   |    |    |    |    |    |  |  |   |   |  |
|     |                                                |                | 241 | P.22/00 (Pengujian Kendaraan Bermotor)                                                                    |                      |   | ✓ |   |   |   |   |   |   |   |    | ✓  |    |    |    |  |  |   |   |  |
|     |                                                |                | 242 | P.17/00 (Kerjasama Pemerintah Daerah Dengan Badan Usaha Swasta)                                           | ✓                    |   |   |   |   |   |   |   |   |   |    |    |    |    |    |  |  |   |   |  |
| 41  | JABAR                                          | Kab. Bekasi    | 243 | P.13/01 (Pertambangan umum)                                                                               |                      |   |   | ✓ |   |   |   |   | ✓ |   | ✓  |    |    |    |    |  |  |   |   |  |
|     |                                                |                | 244 | P.05/01 (Pelynan di bid ketenagakerjaan)                                                                  |                      |   |   |   |   |   |   |   | ✓ | ✓ |    |    |    |    |    |  |  |   |   |  |
|     |                                                |                | 245 | P.19/01 (Pemberian izin mempkerjakan TK WNA pen-datang & iuran dana pengembangan keahlian & keterampilan) |                      |   |   |   |   |   |   |   |   |   | ✓  |    |    |    |    |  |  |   |   |  |
|     |                                                |                | 246 | P.25/00 Retri tmp khusus parkir                                                                           |                      |   |   |   |   |   |   |   |   | ✓ |    |    |    |    |    |  |  |   |   |  |
| 42  | JABAR                                          | Kab. Bogor     | 247 | P.21/00 (Retri pengujian kendrn bermotor)                                                                 |                      |   |   |   |   |   |   |   | ✓ |   | ✓  |    |    |    |    |  |  |   |   |  |
|     |                                                |                | 248 | P.15/02 (Pajak hotel)                                                                                     |                      |   |   |   |   |   | ✓ |   | ✓ |   |    |    |    |    |    |  |  |   |   |  |
|     |                                                |                | 249 | P.16/02 (Pajak restoran)                                                                                  |                      |   |   |   |   |   | ✓ |   |   |   |    |    |    |    |    |  |  |   |   |  |
|     |                                                |                | 250 | P.17/02 (Pajak hiburan)                                                                                   | ✓                    |   |   |   |   |   |   |   |   |   |    |    |    |    |    |  |  |   |   |  |
|     |                                                |                | 251 | P.18/02 (Pajak reklame)                                                                                   |                      |   |   |   |   |   |   |   |   |   |    | ✓  |    |    |    |  |  |   |   |  |
|     |                                                |                | 252 | P.19/02 (Pajak pengambilan & pemnftn galian C)                                                            | ✓                    |   |   |   |   |   |   |   |   |   |    |    |    |    |    |  |  |   |   |  |
|     |                                                |                | 253 | P.20/02 (Pajak parkir)                                                                                    | ✓                    |   |   |   |   |   |   |   |   |   |    |    |    |    |    |  |  |   |   |  |
|     |                                                |                | 254 | P.07/02 (Retri izin usaha industri)                                                                       |                      |   |   |   |   |   |   |   |   |   | ✓  |    | ✓  |    |    |  |  |   |   |  |
|     |                                                |                | 255 | P.08/02 (Retri izin usaha perdagangan)                                                                    |                      |   |   |   |   |   |   |   |   |   | ✓  |    | ✓  |    |    |  |  |   |   |  |
|     |                                                |                | 256 | P.09/02 (Retri izin usaha pariwisata)                                                                     |                      |   |   |   |   |   |   |   |   |   | ✓  |    | ✓  |    |    |  |  |   |   |  |
| 43  | JABAR                                          | Kab. Ciamis    | 257 | P.10/02 (Retri izin usaha sarana wisata)                                                                  |                      |   |   |   |   |   |   |   | ✓ |   | ✓  |    |    |    |    |  |  |   |   |  |
|     |                                                |                | 258 | P.11/02 (Retri izin pengusahaan obyek & daya tarik wisata)                                                |                      |   |   |   |   |   |   |   |   |   | ✓  |    | ✓  |    |    |  |  |   |   |  |
|     |                                                |                | 259 | P.22/00 (Retri izin peruntukan penggnan tanah)                                                            |                      |   |   |   |   |   |   |   |   |   | ✓  |    |    |    |    |  |  |   |   |  |
|     |                                                |                | 260 | P.08/01 (Penyelenggrn & retri pelelangan ikan)                                                            |                      |   |   |   |   |   |   |   |   |   |    | ✓  | ✓  |    |    |  |  |   |   |  |
|     |                                                |                | 261 | P.20/00 (RIG)                                                                                             | ✓                    |   |   |   |   |   |   |   |   |   |    |    |    |    |    |  |  |   |   |  |
|     |                                                |                | 262 | P.18/01 (Retri izin trayek)                                                                               | ✓                    |   |   |   |   |   |   |   |   |   |    |    |    |    |    |  |  |   |   |  |
|     |                                                |                | 263 | P.09/01 (Izin usaha perikanan & kelautan)                                                                 |                      |   |   |   |   |   |   |   |   |   | ✓  |    | ✓  |    |    |  |  |   |   |  |
|     |                                                |                | 264 | P.16/01 (Retri izn usaha angkutan)                                                                        | ✓                    |   |   |   |   |   |   |   |   |   |    |    |    |    |    |  |  |   |   |  |
|     |                                                |                | 265 | P.01/00 (Pajak reklame)                                                                                   | ✓                    |   |   |   |   |   |   |   |   |   |    |    |    |    |    |  |  |   |   |  |
|     |                                                |                | 266 | P.21/00 (Retri IMB)                                                                                       |                      |   |   |   |   |   |   |   |   |   |    | ✓  |    |    |    |  |  |   |   |  |
|     |                                                |                | 267 | P.03/02 (Pengelolaan air bawah tanah)                                                                     |                      |   |   |   |   |   |   |   |   |   |    |    |    |    |    |  |  | ✓ | ✓ |  |
|     |                                                |                | 268 | P.20/01 (Izin usaha kepariwisataan & budaya)                                                              | ✓                    |   |   |   |   |   |   |   |   |   |    |    |    |    |    |  |  |   |   |  |
| 269 | P.21/01 (Retri tempat rekreasi & pariwisata)   | ✓              |     |                                                                                                           |                      |   |   |   |   |   |   |   |   |   |    |    |    |    |    |  |  |   |   |  |
| 270 | P.35/01 (Retri izin lokasi & penetapan lokasi) | ✓              |     |                                                                                                           |                      |   |   |   |   |   |   |   |   |   |    |    |    |    |    |  |  |   |   |  |

| NO. | PROPINSI                           | KABUPATEN/KOTA | No  | PERDA ATAU SK KEPDA                                                                         | JENIS KEBERMASALAHAN |   |   |   |   |   |   |   |   |   |    |    |    |    |    |   |   |
|-----|------------------------------------|----------------|-----|---------------------------------------------------------------------------------------------|----------------------|---|---|---|---|---|---|---|---|---|----|----|----|----|----|---|---|
|     |                                    |                |     |                                                                                             | 0                    | 1 | 2 | 3 | 4 | 5 | 6 | 7 | 8 | 9 | 10 | 11 | 12 | 13 | 14 |   |   |
| 44  | JABAR                              | Kab. Cirebon   | 271 | P.26/96 (IMB)                                                                               |                      |   | ✓ |   |   |   |   |   | ✓ |   |    |    |    |    |    |   |   |
|     |                                    |                | 272 | P.51/01 (Pajak hasil usaha sarang burung walet)                                             |                      |   |   |   |   |   |   |   | ✓ |   |    |    |    |    |    |   |   |
|     |                                    |                | 273 | P.53/01 (Penyelenggaraan pelelangan ikan)                                                   |                      |   |   |   |   |   |   |   |   |   |    |    |    | ✓  |    |   |   |
|     |                                    |                | 274 | P.54/01 (Tempat pelelangan ikan)                                                            |                      |   |   |   |   |   |   |   |   |   |    |    |    | ✓  |    |   |   |
| 45  | JABAR                              | Kab. Garut     | 275 | P.25/01 (Pajak parkir)                                                                      | ✓                    |   |   |   |   |   |   |   |   |   |    |    |    |    |    |   |   |
|     |                                    |                | 276 | P.19/01 (PPJ)                                                                               |                      |   |   |   |   |   |   |   |   | ✓ |    |    |    |    |    |   |   |
|     |                                    |                | 277 | P.13/00 (Retri plynan izin usaha indsutri & perdgn)                                         |                      |   |   |   |   |   |   |   |   |   | ✓  |    |    |    |    |   |   |
|     |                                    |                | 278 | P.15/01 (Pelayanan izin gangguan & izin tmp usaha)                                          | ✓                    |   |   |   |   |   |   |   |   |   |    |    |    |    |    |   |   |
|     |                                    |                | 279 | P.05/01 (Retri pelyn izin trayek angkutan penumpang umum)                                   | ✓                    |   |   |   |   |   |   |   |   |   |    |    |    |    |    |   |   |
|     |                                    |                | 280 | P.06/01 (Retri plyn izin usaha angkutan)                                                    |                      |   |   |   |   |   |   |   |   |   |    |    |    |    |    | ✓ |   |
|     |                                    |                | 281 | P.27/01 (Pajak televisi)                                                                    | ✓                    |   |   |   |   |   |   |   |   |   |    |    |    |    |    |   |   |
|     |                                    |                | 282 | P.07/01 (Retri plyn izin bongkar muat)                                                      | ✓                    |   |   |   |   |   |   |   |   |   |    |    |    |    |    |   |   |
|     |                                    |                | 283 | P.26/01 (Pajak sarang burng walet)                                                          |                      |   |   |   |   |   |   |   |   |   |    | ✓  |    |    |    |   |   |
|     |                                    |                | 284 | P.34/01 (Penerimaan sumb pihak ketiga)                                                      |                      |   |   |   |   |   |   |   |   |   |    |    |    |    |    | ✓ |   |
|     |                                    |                | 285 | P.32/01 (Retri perizinan pengambilan air bawah tanah & air permukaan)                       |                      |   |   |   |   |   |   |   |   |   |    |    |    |    |    | ✓ | ✓ |
|     |                                    |                | 286 | P.09/01 (Retri plyn izin pengelolaan kayu milik)                                            |                      |   |   |   |   |   |   |   |   |   |    | ✓  |    |    |    |   |   |
|     |                                    |                | 287 | P.14/01 (Retri pelayanan pemeriksaan susu perah)                                            |                      |   |   |   |   |   |   |   | ✓ |   |    | ✓  |    |    |    |   |   |
|     |                                    |                | 288 | P.10/01 (Retri plyn izin usaha perdagangan)                                                 |                      |   |   |   |   |   |   |   |   |   |    | ✓  |    |    |    | ✓ |   |
|     |                                    |                | 289 | P.06/99 (Pajak hiburan)                                                                     |                      |   |   |   |   |   |   |   |   |   |    |    |    |    |    |   |   |
|     |                                    |                | 290 | P.04/99 (Pajak reklame)                                                                     |                      |   |   |   |   |   |   |   |   |   |    | ✓  |    |    |    |   |   |
|     |                                    |                | 291 | P.05/99 (PHR)                                                                               |                      |   |   |   |   |   |   |   |   |   |    |    |    |    |    |   |   |
|     |                                    |                | 292 | P.08/99 (Retri pasar)                                                                       |                      |   |   |   |   |   |   |   |   |   |    |    |    |    |    |   |   |
| 293 | P.01/00 (Retri terminal)           |                |     |                                                                                             |                      |   |   |   |   |   |   |   |   |   |    |    |    |    |    |   |   |
| 294 | P.02/00 (Retri rumah potong hewan) |                |     |                                                                                             |                      |   |   |   |   |   |   |   |   |   |    |    |    |    |    |   |   |
| 46  | JABAR                              | Kab. Indramayu | 295 | P.02/01 (Bangunan di Kab. Indramayu)                                                        |                      |   |   |   |   |   |   |   | ✓ |   |    |    |    |    |    |   |   |
|     |                                    |                | 296 | P.26/01 (Izin usaha perdagangan)                                                            |                      |   |   |   |   |   |   |   |   |   | ✓  |    |    |    |    |   |   |
|     |                                    |                | 297 | P.27/01 (Retri izin usaha industri)                                                         |                      |   |   |   |   |   |   |   |   |   |    | ✓  |    |    |    |   |   |
|     |                                    |                | 298 | P.29/01 (Penyelenggrn wajib daftar perusahaan)                                              |                      |   |   |   |   |   |   |   |   |   |    | ✓  |    |    |    |   |   |
|     |                                    |                | 299 | P.33/01 (Retri izin pembuatan, pengusahaan tambak & pengelolaan tmp penjualan hasil tambak) |                      |   |   |   |   |   |   |   |   |   |    |    |    |    |    |   |   |
|     |                                    |                | 300 | P.34/01 (Retri izin usaha pembenihan udang)                                                 |                      |   |   |   |   |   |   |   |   |   |    |    |    |    |    |   |   |
|     |                                    |                | 301 | P.11/01 (Retri dispensasi bongkar muat barang)                                              |                      |   |   |   |   |   |   |   |   |   |    |    | ✓  |    |    |   |   |
| 47  | JABAR                              | Kab. Karawang  | 302 | P.10/01 (Retri izin usaha perdagangan)                                                      |                      |   |   |   |   |   |   |   |   | ✓ | ✓  |    |    |    |    |   |   |
|     |                                    |                | 303 | P.18/01 (Retri izin pertmbgn umum)                                                          |                      |   |   |   |   |   |   |   |   |   |    | ✓  | ✓  |    |    |   |   |
|     |                                    |                | 304 | P.22/01 (Retri plyn bid. ketenagkerjaan)                                                    |                      |   |   |   |   |   |   |   |   |   |    | ✓  |    |    |    |   |   |
|     |                                    |                | 305 | P.15/01 (Pengendalian perizinan & Retri limbah pdt)                                         |                      |   |   |   |   |   |   |   |   |   |    |    |    |    | ✓  | ✓ | ✓ |
| 48  | JABAR                              | Kab. Kuningan  | 306 | P.15/01 (Pajak Restoran)                                                                    | ✓                    |   |   |   |   |   |   |   |   |   |    |    |    |    |    |   |   |



| NO. | PROPINSI | KABUPATEN/KOTA | No  | PERDA ATAU SK KEPDA                                           | JENIS KEBERMASALAHAN |   |   |   |   |   |   |   |   |   |    |    |    |    |    |   |   |
|-----|----------|----------------|-----|---------------------------------------------------------------|----------------------|---|---|---|---|---|---|---|---|---|----|----|----|----|----|---|---|
|     |          |                |     |                                                               | 0                    | 1 | 2 | 3 | 4 | 5 | 6 | 7 | 8 | 9 | 10 | 11 | 12 | 13 | 14 |   |   |
| 49  | JABAR    | Kab. Sukabumi  | 307 | P.09/01 (Retribusi Pemeriksaan Kesehatan Hewan Dan Ikan)      |                      |   |   | ✓ |   |   |   |   |   |   |    | ✓  |    |    |    |   |   |
| 50  | JABAR    | Kab. Sumedang  | 308 | P.52/00 (Pengusahaan pertmbgn umum)                           |                      |   |   |   |   |   |   |   |   | ✓ |    |    |    |    | ✓  |   |   |
| 51  | JABAR    | Kab. Tasikmly  | 309 | P.32/00 (Retri pemberian izin & biaya pembongkaran reklame    |                      |   |   |   |   |   |   |   |   |   | ✓  |    |    |    |    |   |   |
|     |          |                | 310 | P.01/98 (Pajak pengambilan & pengeolhn galian C)              |                      |   | ✓ |   |   |   |   |   |   |   |    |    |    |    |    |   |   |
|     |          |                | 311 | P.18/98 (Pajak hiburan)                                       |                      |   | ✓ |   |   |   |   |   |   |   |    |    |    |    |    |   |   |
|     |          |                | 312 | P.10/02 (Pajak parkir)                                        |                      |   |   |   |   |   |   |   |   |   | ✓  |    |    |    |    |   |   |
|     |          |                | 313 | P.11/02 (Pajak hotel)                                         | ✓                    |   |   |   |   |   |   |   |   |   |    |    |    |    |    |   |   |
|     |          |                | 314 | P.12/02 (Pajak restoran)                                      | ✓                    |   |   |   |   |   |   |   |   |   |    |    |    |    |    |   |   |
|     |          |                | 315 | P.30/00 (Izin aneka usaha hasil hutan)                        |                      |   |   |   |   |   |   |   |   |   |    |    |    | ✓  |    |   |   |
|     |          |                | 316 | P.42/00 (Izin usaha angkutan)                                 |                      |   |   |   |   |   |   |   |   |   |    |    |    | ✓  |    |   |   |
|     |          |                | 317 | P.43/00 (Izin bongkar muat )                                  |                      |   |   |   |   |   |   |   |   |   |    |    |    | ✓  |    |   |   |
| 52  | JABAR    | Kota Bekasi    | 318 | P.05/01 (Pelynan & retri di bid ketenagakerjaan)              |                      |   |   |   | ✓ |   |   |   | ✓ | ✓ |    |    |    |    |    |   |   |
|     |          |                | 319 | P.04/01 (Penyelenggaraan & ujian berkala kndr bermtr          | ✓                    |   |   |   |   |   |   |   |   |   |    |    |    |    |    |   |   |
| 53  | JABAR    | Kota Bogor     | 320 | P.08/99 (RIG)                                                 |                      |   | ✓ |   |   | ✓ |   |   |   |   |    |    |    |    |    |   |   |
|     |          |                | 321 | P.12/99 (Retri pasar)                                         |                      |   |   |   |   |   |   |   |   | ✓ |    |    |    |    |    |   |   |
|     |          |                | 322 | P.05/01 (Retri pemeriksaan susu murni)                        | ✓                    |   |   |   |   |   |   |   |   |   |    |    |    |    |    |   |   |
|     |          |                | 323 | P.04/01 (Retri pemasukan, penampungan & pengeluaran hewan     |                      |   |   |   | ✓ |   |   |   | ✓ |   |    |    |    |    |    |   |   |
|     |          |                | 324 | P.06/01 (Retri pemeriksaan, pemotongan & pemsaran daging ayam |                      |   |   |   |   |   |   |   |   |   | ✓  |    |    |    |    | ✓ |   |
|     |          |                | 325 | P.07/01 (Retri pemakaian jln utk angktr barang                |                      |   |   |   |   |   |   |   |   | ✓ |    |    |    |    |    | ✓ |   |
|     |          |                | 326 | P.03/02 (Penyelenggrn lalin & jalan)                          |                      |   |   |   |   |   | ✓ |   |   |   |    |    |    |    |    |   |   |
|     |          |                | 327 | P.07/02 (Pemanfaatan air bawah tanah & permukaan)             |                      |   |   |   |   |   |   |   |   |   |    |    |    |    |    | ✓ | ✓ |
|     |          |                | 328 | P.10/02 (Retri IMB)                                           | ✓                    |   |   |   |   |   |   |   |   |   |    |    |    |    |    |   |   |
|     |          |                | 329 | P.11/02 (retri pengujian kendaraan bermotor)                  | ✓                    |   |   |   |   |   |   |   |   |   |    |    |    |    |    |   |   |
|     |          |                | 330 | P.13/02 (Retri izin usaha jasa konstruksi)                    |                      |   |   |   |   |   |   |   |   | ✓ |    | ✓  |    |    |    |   |   |
|     |          |                | 331 | P.15/02 (Pajak hotel)                                         |                      |   |   |   |   |   | ✓ |   |   |   |    | ✓  |    |    |    |   |   |
|     |          |                | 332 | P.16/02 (Pajak restoran)                                      | ✓                    |   |   |   |   |   |   |   |   |   |    |    |    |    |    |   |   |
| 54  | JABAR    | Kota Cirebon   | 333 | P.26/96 (IMB)                                                 |                      |   | ✓ |   |   |   |   |   |   | ✓ |    |    |    |    |    |   |   |
|     |          |                | 334 | P.07/98 (Pajak pengmln & pengolhn galian C)                   |                      |   | ✓ |   |   |   |   |   |   |   |    |    |    |    | ✓  |   |   |
|     |          |                | 335 | P.02/01 (Izin UU Gangguan)                                    |                      |   | ✓ |   |   | ✓ |   |   |   |   |    |    |    |    |    | ✓ |   |
|     |          |                | 336 | P.03/01 (RIG)                                                 | ✓                    |   |   |   |   |   |   |   |   |   |    |    |    |    |    |   |   |
|     |          |                | 337 | P.12/01 (Izin usaha kepariwisataan)                           |                      |   |   |   |   | ✓ |   |   |   |   |    |    |    |    |    | ✓ |   |
|     |          |                | 338 | P.02/98 (PHR)                                                 |                      |   | ✓ |   |   |   |   |   |   |   |    |    |    |    |    |   |   |
|     |          |                | 339 | P.03/98 (Pajak hiburan)                                       |                      |   | ✓ |   |   |   |   |   |   |   |    |    |    |    |    |   |   |
|     |          |                | 340 | P.05/98 (PPJ)                                                 |                      |   | ✓ |   |   |   |   |   |   |   |    | ✓  |    |    |    |   |   |
|     |          |                | 341 | P.06/98 (Pajak pemanftrn air bawah tanah & permkn             |                      |   |   |   | ✓ |   |   |   |   |   |    |    |    |    |    | ✓ | ✓ |
| 55  | JABAR    | Kota Sukabumi  | 342 | P.01/98 (Pajak hotel dan restoran)                            |                      |   | ✓ |   |   |   |   |   |   |   |    |    |    |    |    |   |   |
|     |          |                | 343 | P.04/98 (PPJ)                                                 |                      |   | ✓ |   |   |   |   |   |   |   | ✓  |    |    |    |    |   |   |

| NO. | PROPINSI | KABUPATEN/KOTA  | No  | PERDA ATAU SK KEPDA                                                   | JENIS KEBERMASALAHAN |   |   |   |   |   |   |   |   |   |    |    |    |    |    |
|-----|----------|-----------------|-----|-----------------------------------------------------------------------|----------------------|---|---|---|---|---|---|---|---|---|----|----|----|----|----|
|     |          |                 |     |                                                                       | 0                    | 1 | 2 | 3 | 4 | 5 | 6 | 7 | 8 | 9 | 10 | 11 | 12 | 13 | 14 |
|     |          |                 | 344 | P.03/02 (Retri pasar)                                                 | ✓                    |   |   |   |   |   |   |   |   |   |    |    |    |    |    |
|     |          |                 | 345 | P.09/00 (Izin gg)                                                     |                      |   |   |   | ✓ |   |   |   | ✓ |   |    |    |    |    |    |
| 56  | JATENG   | Kab. Kendal     | 346 | P.23/01 (Izin usaha kepariwisataan)                                   |                      |   |   |   |   | ✓ |   |   |   |   |    |    |    | ✓  |    |
|     |          |                 | 347 | P.22/01 (Retri jasa usaha di bidang peternakan)                       |                      |   |   |   |   | ✓ |   |   |   |   |    |    |    |    |    |
|     |          |                 | 348 | SK.50/01 (Smbg pihak ketiga dari pengusaha perikanan)                 |                      |   |   |   | ✓ |   |   |   |   |   |    |    |    |    | ✓  |
| 57  | JATENG   | Kab. Magelang   | 349 | P.05/99 (Retri pasar)                                                 |                      |   |   |   |   |   |   |   |   | ✓ |    |    |    |    |    |
|     |          |                 | 350 | P.05/00 (Bangunan)                                                    |                      |   |   |   |   |   |   |   |   | ✓ |    |    |    |    |    |
|     |          |                 | 351 | P.13/00 (Kartu ternak)                                                |                      |   |   |   |   |   |   |   | ✓ |   |    |    |    |    |    |
|     |          |                 | 352 | P.14/01 (Retri izin terbang kayu rakyat & penerbitan SKSHH atau SAKM) |                      |   |   |   | ✓ | ✓ |   |   |   | ✓ |    |    |    |    |    |
| 58  | JATENG   | Kab. Pekalongan | 353 | P.02/01 (Retri plynan persampahan/kebersihan)                         |                      |   |   |   |   |   |   |   |   | ✓ |    |    |    |    |    |
|     |          |                 | 354 | P.04/01 (Retri pasar grosir & pertokoan)                              |                      |   |   |   |   |   |   |   |   | ✓ |    |    |    |    |    |
|     |          |                 | 355 | P.05/01 (Retri plyn kesehatan di puskesmas)                           | ✓                    |   |   |   |   |   |   |   |   |   |    |    |    |    |    |
|     |          |                 | 356 | P.07/01 (Perusahaan daerah)                                           | ✓                    |   |   |   |   |   |   |   |   |   |    |    |    |    |    |
| 59  | JATENG   | Kab. Pemalang   | 357 | P.16/01 (Pajak sarang burung walet)                                   | ✓                    |   |   |   |   |   |   |   |   |   |    |    |    |    |    |
|     |          |                 | 358 | P.17/01 (Retri izin pengelolaan & pengusaha sarang burung walet)      |                      |   |   |   |   |   |   |   |   | ✓ |    |    |    |    |    |
|     |          |                 | 359 | P.19/01 (Retri izin trayek)                                           |                      |   |   |   |   | ✓ |   |   |   |   |    |    |    |    |    |
|     |          |                 | 360 | P.9/88 (Sumb pihak ketiga kepada daerah)                              |                      |   |   |   |   |   |   |   |   | ✓ |    |    |    |    | ✓  |
|     |          |                 | 361 | P.22/01 (Surat izin terbang kayu hutan rakyat & penerbitan SKSHH)     | ✓                    |   |   |   |   |   |   |   |   |   |    |    |    |    |    |
| 60  | JATENG   | Kab. Sukoharjo  | 362 | P.28/01 (Retri izin trayek)                                           | ✓                    |   |   |   |   |   |   |   |   |   |    |    |    |    |    |
|     |          |                 | 363 | P.30/01 (Retri izin ketenagakerjaan)                                  |                      |   |   |   |   |   |   |   |   | ✓ | ✓  |    |    |    |    |
|     |          |                 | 364 | P.31/01 (Retri plyn ketenagakerjaan)                                  |                      |   |   |   |   |   |   |   | ✓ |   | ✓  |    |    |    |    |
|     |          |                 | 365 | P.32/01 (Retri izin keselamatan & kesehatan kerja)                    |                      |   |   |   |   |   |   |   |   |   | ✓  |    |    |    | ✓  |
| 61  | JATENG   | Kab. Tegal      | 366 | P.06/99 (Retri pasar)                                                 |                      |   | ✓ |   |   |   |   |   |   |   |    |    |    |    |    |
|     |          |                 | 367 | P.01/98 (Pajak pengambilan & pengeolhn galian C)                      |                      |   | ✓ |   |   |   |   |   |   |   |    |    |    |    |    |
|     |          |                 | 368 | P.05/98 (PHR)                                                         |                      |   | ✓ |   |   |   |   |   |   |   |    |    |    |    |    |
|     |          |                 | 369 | P.07/98 (PPJ)                                                         |                      |   | ✓ |   |   |   |   |   |   | ✓ |    |    |    |    |    |
|     |          |                 | 370 | P.16/00 (Izin usaha angkutan)                                         | ✓                    |   |   |   |   |   |   |   |   |   |    |    |    |    |    |
| 62  | JATENG   | Kota Pekalongan | 371 | P.05/99 (RIG)                                                         |                      |   | ✓ |   |   |   |   |   |   | ✓ |    |    |    |    |    |
|     |          |                 | 372 | P.02/01 (Retri pelyn persampahan/kebersihan)                          |                      |   |   |   | ✓ |   |   | ✓ |   |   |    |    |    |    |    |
|     |          |                 | 373 | P.04/01 (Retri pasar grosir & pertokoan)                              |                      |   |   |   |   |   |   | ✓ |   |   |    |    |    |    |    |
|     |          |                 | 374 | P.05/01 (Retri plyn kesehatan di puskesmas)                           | ✓                    |   |   |   |   |   |   |   |   |   |    |    |    |    |    |
|     |          |                 | 375 | P.07/01 (Persuahaan daerah)                                           | ✓                    |   |   |   |   |   |   |   |   |   |    |    |    |    |    |
| 63  | JATENG   | Kota Semarang   | 376 | P.13/01 (Pajak hotel)                                                 | ✓                    |   |   |   |   |   |   |   |   |   |    |    |    |    |    |
|     |          |                 | 377 | P.08/01 (Pajak restoran)                                              | ✓                    |   |   |   |   |   |   |   |   |   |    |    |    |    |    |
|     |          |                 | 378 | P.12/01 (PPJ)                                                         |                      |   |   |   |   |   |   |   |   | ✓ |    |    |    |    |    |
| 64  | JATENG   | Kota Tegal      | 379 | P.05/01 (RIG)                                                         | ✓                    |   |   |   |   |   |   |   |   |   |    |    |    |    |    |
|     |          |                 | 380 | P.04/00 (Retri parkir di tepi jalan umum)                             |                      |   | ✓ |   |   |   |   |   |   |   |    |    |    |    |    |

| NO. | PROPINSI | KABUPATEN/KOTA  | No  | PERDA ATAU SK KEPDA                                                                           | JENIS KEBERMASALAHAN |   |   |   |   |   |   |   |   |   |    |    |    |    |    |   |  |
|-----|----------|-----------------|-----|-----------------------------------------------------------------------------------------------|----------------------|---|---|---|---|---|---|---|---|---|----|----|----|----|----|---|--|
|     |          |                 |     |                                                                                               | 0                    | 1 | 2 | 3 | 4 | 5 | 6 | 7 | 8 | 9 | 10 | 11 | 12 | 13 | 14 |   |  |
| 65  | DIY      | Kota Yogyakarta | 381 | P.07/01 (Penerimaan sumb pihak ketiga)                                                        |                      | ✓ |   |   |   |   |   |   |   |   |    |    |    | ✓  |    |   |  |
|     |          |                 | 382 | P.09/00 (Retri pasar)                                                                         | ✓                    |   |   |   |   |   |   |   |   |   |    |    |    |    |    |   |  |
| 66  | JATIM    | Kab. Bangkalan  | 383 | P.06/00 (Pokok-pokok pengelolaan keuangan daerah)                                             | ✓                    |   |   |   |   |   |   |   |   |   |    |    |    |    |    |   |  |
|     |          |                 | 384 | P.06/01 (Retri perizinan angkutan)                                                            | ✓                    |   |   |   |   |   |   |   |   |   |    |    |    |    |    |   |  |
| 67  | JATIM    | Kab. Banyuwangi | 385 | P.12/00 (Retri rumah potong hewan)                                                            |                      |   |   |   | ✓ |   |   |   |   |   |    |    |    |    |    |   |  |
|     |          |                 | 386 | P.10/00 (Retri terminal)                                                                      | ✓                    |   |   |   |   |   |   |   |   |   |    |    |    |    |    |   |  |
| 68  | JATIM    | Kab. Blitar     | 387 | P.10/98 (Pajak pengmbln & penglhn galian C)                                                   |                      |   | ✓ |   |   | ✓ |   |   |   |   |    |    |    |    |    |   |  |
|     |          |                 | 388 | P.22/98 (RIG)                                                                                 |                      |   | ✓ |   |   |   |   |   | ✓ |   |    |    |    |    |    |   |  |
|     |          |                 | 389 | P.23/98 (Retri izin peruntukan penggnan tanah)                                                |                      |   | ✓ |   |   |   |   |   |   |   |    |    |    |    |    |   |  |
|     |          |                 | 390 | P.04/98 (Retri izin trayek)                                                                   |                      | ✓ | ✓ |   |   |   |   |   |   |   |    |    |    |    |    |   |  |
|     |          |                 | 391 | P.11/98 (PHR)                                                                                 |                      |   | ✓ |   |   |   |   |   |   |   |    |    |    |    |    |   |  |
|     |          |                 | 392 | P.20/98 (PPJ)                                                                                 |                      |   | ✓ |   |   |   |   |   |   |   |    |    |    |    |    |   |  |
|     |          |                 | 393 | P.21/98 (Retri parkir)                                                                        |                      |   | ✓ |   |   |   | ✓ |   |   |   |    |    |    |    |    |   |  |
| 69  | JATIM    | Kab. Kediri     | 394 | P.23/00 (Retri kartu ternak)                                                                  |                      |   |   |   |   |   |   | ✓ | ✓ |   |    |    |    |    |    |   |  |
|     |          |                 | 395 | P.27/00 (Retri izin pengbln hasil hutan rky non kayu)                                         |                      |   |   |   |   |   |   |   | ✓ | ✓ |    |    |    |    |    |   |  |
|     |          |                 | 396 | P.24/00 (Retri pemeriksaan daging yang berasal dari luar daerah & dipasarkan di Kab.Blitar)   |                      |   |   |   |   |   |   |   |   | ✓ | ✓  |    |    |    |    |   |  |
|     |          |                 | 397 | P.26/00 (Retri izin tebang kayu desa / htn rky & kayu hasil perkebunan serta penerbitan SAKM) |                      |   |   |   |   |   |   |   |   | ✓ | ✓  |    |    |    |    |   |  |
| 70  | JATIM    | Kab. Magetan    | 398 | P.03/00 (Retri tmp khusus parkir)                                                             | ✓                    |   |   |   |   |   |   |   |   |   |    |    |    |    |    |   |  |
|     |          |                 | 399 | P.04/00 (Retri terminal)                                                                      |                      |   |   |   |   |   |   |   |   | ✓ |    |    |    |    |    |   |  |
|     |          |                 | 400 | P.22/01 (Retri pasar)                                                                         | ✓                    |   |   |   |   |   |   |   |   |   |    |    |    |    |    |   |  |
|     |          |                 | 401 | P.15/01 (Pajak Restoran)                                                                      | ✓                    |   |   |   |   |   |   |   |   |   |    |    |    |    |    |   |  |
|     |          |                 | 402 | P.17/01 (Pajak penggunaan tenaga listrik)                                                     |                      |   |   |   |   |   |   |   |   |   |    | ✓  |    |    |    |   |  |
|     |          |                 | 403 | P.31/01 (Izin usaha jasa konstruksi)                                                          |                      |   |   |   |   |   |   |   |   |   | ✓  | ✓  | ✓  |    |    |   |  |
| 71  | JATIM    | Kab. Mojokerto  | 404 | P.09/00 (Retri IMB)                                                                           |                      |   |   |   |   |   |   |   |   | ✓ | ✓  |    |    |    |    |   |  |
|     |          |                 | 405 | P.21/00 (Retri usaha daerah)                                                                  |                      |   |   |   |   | ✓ |   |   | ✓ |   |    |    |    | ✓  |    |   |  |
|     |          |                 | 406 | P.23/00 (Retri kepemilikan kartu ternak)                                                      |                      |   |   | ✓ |   |   |   |   | ✓ |   |    |    |    |    |    |   |  |
|     |          |                 | 407 | P.24/00 (Retri pemeliharaan jalan)                                                            |                      |   |   |   |   |   |   |   | ✓ |   | ✓  |    |    |    |    |   |  |
|     |          |                 | 408 | P.04/00 (Retri pasar)                                                                         |                      |   | ✓ |   | ✓ | ✓ |   |   |   |   |    |    |    |    |    |   |  |
| 72  | JATIM    | Kab. Pamekasan  | 409 | P.05/00 (RIG)                                                                                 |                      |   |   |   |   |   |   | ✓ |   |   |    |    |    |    |    |   |  |
|     |          |                 | 410 | P.07/00 (Retri pasar grosir atau pertokoan)                                                   |                      |   | ✓ |   | ✓ |   |   |   |   |   |    |    |    |    |    |   |  |
|     |          |                 | 411 | P.03/00 (Retri penyelenggaraan parkir)                                                        | ✓                    |   |   |   |   |   |   |   |   |   |    |    |    |    |    |   |  |
|     |          |                 | 412 | P.02/00 (Retri rumah potong hewan)                                                            | ✓                    |   |   |   |   |   |   |   |   |   |    |    |    |    |    |   |  |
|     |          |                 | 413 | P.05/00 (Retri pasar)                                                                         |                      |   | ✓ |   |   |   |   |   |   |   |    |    |    |    |    | ✓ |  |
|     |          |                 | 414 | P.03/00 (PPJ)                                                                                 |                      |   |   |   |   |   |   |   |   |   |    | ✓  |    |    |    |   |  |
|     |          |                 | 415 | P.04/00 (Pajak reklame)                                                                       | ✓                    |   |   |   |   |   |   |   |   |   |    |    |    |    |    |   |  |

| NO. | PROPINSI | KABUPATEN/KOTA   | No  | PERDA ATAU SK KEPDA                                                             | JENIS KEBERMASALAHAN |   |   |   |   |   |   |   |   |   |    |    |    |    |    |   |  |
|-----|----------|------------------|-----|---------------------------------------------------------------------------------|----------------------|---|---|---|---|---|---|---|---|---|----|----|----|----|----|---|--|
|     |          |                  |     |                                                                                 | 0                    | 1 | 2 | 3 | 4 | 5 | 6 | 7 | 8 | 9 | 10 | 11 | 12 | 13 | 14 |   |  |
| 73  | JATIM    | Kab. Pasuruan    | 416 | P.07/00 (Retri izin trayek)                                                     |                      | ✓ | ✓ |   |   |   |   |   | ✓ |   |    |    |    |    |    |   |  |
|     |          |                  | 417 | P.05/00 (Retri pasar)                                                           |                      |   | ✓ |   |   |   |   |   |   |   |    |    |    |    |    |   |  |
|     |          |                  | 418 | P.04/00 (Iuran pengelolaan irigasi)                                             |                      |   |   | ✓ |   | ✓ |   |   |   | ✓ |    |    |    |    |    |   |  |
|     |          |                  | 419 | P.06/00 (IMB)                                                                   |                      |   |   | ✓ |   | ✓ |   |   |   | ✓ |    |    |    |    |    |   |  |
|     |          |                  | 420 | P.14/01 (Retri pasar)                                                           |                      |   |   |   | ✓ |   |   |   |   | ✓ |    |    |    |    |    |   |  |
| 74  | JATIM    | Kab. Sidoarjo    | 421 | P.18/01 (Retri kartu ternak)                                                    |                      |   |   | ✓ |   | ✓ |   | ✓ |   |   |    |    |    |    |    |   |  |
|     |          |                  | 422 | P.08/01 (Pajak hotel)                                                           | ✓                    |   |   |   |   |   |   |   |   |   |    |    |    |    |    |   |  |
|     |          |                  | 423 | P.09/01 (Pajak restoran)                                                        | ✓                    |   |   |   |   |   |   |   |   |   |    |    |    |    |    |   |  |
|     |          |                  | 424 | P.12/01 (PPJ)                                                                   | ✓                    |   |   |   |   |   |   |   |   |   |    |    |    |    |    |   |  |
|     |          |                  | 425 | P.26/01 (Retri izin gangguan)                                                   | ✓                    |   |   |   |   |   |   |   |   |   |    |    |    |    |    |   |  |
| 75  | JATIM    | Kota Kediri      | 426 | P.31/01 (Retri ketenagakerjaan daerah)                                          |                      |   |   |   |   |   |   |   | ✓ |   |    |    |    |    |    |   |  |
|     |          |                  | 427 | P.02/02 (Perizinan usaha jasa konstruksi)                                       |                      |   |   |   |   |   |   | ✓ |   |   |    |    |    | ✓  |    |   |  |
|     |          |                  | 428 | P.08/00 (Retri izin gangguan)                                                   |                      |   |   |   |   |   |   |   |   |   |    |    |    |    |    | ✓ |  |
|     |          |                  | 429 | P.02/01 (Retri perizinan dlm industri perdgangan)                               |                      |   |   |   |   |   |   |   |   |   |    |    |    | ✓  | ✓  |   |  |
|     |          |                  | 430 | P.03/02 (PPJ)                                                                   | ✓                    |   |   |   |   |   |   |   |   |   |    |    |    |    |    |   |  |
| 76  | JATIM    | Kota Malang      | 431 | P.05/02 (Pajak hiburan)                                                         |                      |   |   |   |   | ✓ |   |   |   |   |    |    |    |    |    |   |  |
|     |          |                  | 432 | P.03/02 (Pajak parkir)                                                          | ✓                    |   |   |   |   |   |   |   |   |   |    |    |    |    |    |   |  |
|     |          |                  | 433 | P.02/02 (Retri pelayanan parkir)                                                | ✓                    |   |   |   |   |   |   |   |   |   |    |    |    |    |    |   |  |
| 77  | JATIM    | Kota Mojokerto   | 434 | P.01/02 (Penyelenggaraan parkir)                                                | ✓                    |   |   |   |   |   |   |   |   |   |    |    |    |    |    |   |  |
|     |          |                  | 435 | P.04/00 (Retri IMB)                                                             |                      |   |   |   | ✓ |   |   |   | ✓ |   |    |    |    |    |    |   |  |
|     |          |                  | 436 | P.06/00 (Retri izin trayek)                                                     |                      |   |   |   |   |   |   |   |   | ✓ |    |    |    |    |    |   |  |
| 78  | JATIM    | Kota Probolinggo | 437 | P.07/00 (Retri pemakaian kekayaan daerah)                                       | ✓                    |   |   |   |   |   |   |   |   |   |    |    |    |    |    |   |  |
|     |          |                  | 438 | P.03/00 (Retri pasar)                                                           |                      |   |   |   |   |   |   |   |   | ✓ |    |    |    |    |    |   |  |
|     |          |                  | 439 | P.14/00 (Retri IMB)                                                             |                      |   |   |   | ✓ |   |   |   |   | ✓ |    |    |    |    |    |   |  |
|     |          |                  | 440 | P.15/01 (Retri pasar grosir pelelangan ikan)                                    |                      |   |   |   |   |   |   |   |   |   |    |    | ✓  |    |    |   |  |
|     |          |                  | 441 | P.11/01 (Sumb pihak ketiga)                                                     |                      |   |   |   |   |   |   |   |   |   | ✓  |    |    |    | ✓  |   |  |
|     |          |                  | 442 | P.04/01 (Izin usaha perikanan)                                                  |                      |   |   | ✓ |   |   |   |   |   |   |    |    |    | ✓  | ✓  |   |  |
|     |          |                  | 443 | P.11/00 (Retri rumah potong hewan)                                              |                      | ✓ | ✓ |   |   |   |   |   |   |   |    |    |    |    |    |   |  |
|     |          |                  | 444 | P.05/00 (Retri parkir)                                                          |                      | ✓ | ✓ |   |   |   |   |   |   | ✓ |    |    |    |    |    |   |  |
|     |          |                  | 445 | P.04/00 (Retri terminal)                                                        |                      | ✓ | ✓ |   |   |   |   |   |   |   |    |    |    |    |    |   |  |
|     |          |                  | 446 | P.10/00 (RIG)                                                                   |                      |   | ✓ |   |   |   |   |   |   |   | ✓  |    |    |    |    |   |  |
| 79  | JATIM    | Kota Surabaya    | 447 | SK 27/00 (Pedomaan perizinan usaha penggilingan padi, huler & penyosohan beras) |                      |   |   |   |   | ✓ |   |   | ✓ |   |    |    |    |    |    |   |  |
|     |          |                  | 448 | P.07/00 (Penyelenggaraan perparkiran)                                           |                      |   |   |   |   |   |   |   | ✓ | ✓ | ✓  |    |    |    |    |   |  |
|     |          |                  | 449 | P.09/00 (Retri parkir di tepi jalan umum)                                       |                      |   |   |   |   |   |   |   |   |   | ✓  |    |    |    |    |   |  |
|     |          |                  | 450 | P.10/00 (Ketentuan umum penggn jalan)                                           |                      |   |   |   |   |   |   |   |   |   | ✓  |    |    |    |    |   |  |
|     |          |                  | 451 | P.16/98 (PPJ)                                                                   |                      | ✓ | ✓ |   |   |   |   |   |   |   | ✓  |    |    |    |    |   |  |

| NO. | PROPINSI | KABUPATEN/KOTA | No  | PERDA ATAU SK KEPDA                                                                                                                                   | JENIS KEBERMASALAHAN |   |   |   |   |   |   |   |   |   |    |    |    |    |    |  |  |
|-----|----------|----------------|-----|-------------------------------------------------------------------------------------------------------------------------------------------------------|----------------------|---|---|---|---|---|---|---|---|---|----|----|----|----|----|--|--|
|     |          |                |     |                                                                                                                                                       | 0                    | 1 | 2 | 3 | 4 | 5 | 6 | 7 | 8 | 9 | 10 | 11 | 12 | 13 | 14 |  |  |
| 80  | BALI     | Kab. Badung    | 452 | P.11/99 (Retri rumah potong hewan)                                                                                                                    | ✓                    |   |   |   |   |   |   |   |   |   |    |    |    |    |    |  |  |
|     |          |                | 453 | P.10/99 (Retri izin trayek)                                                                                                                           |                      |   |   |   |   |   |   |   |   | ✓ |    |    |    |    |    |  |  |
|     |          |                | 454 | P.19/99 (Retri parkir di depan umum)                                                                                                                  | ✓                    |   |   |   |   |   |   |   |   |   |    |    |    |    |    |  |  |
|     |          |                | 455 | P.08/99 (RIG)                                                                                                                                         |                      |   |   |   |   |   |   |   |   |   | ✓  |    |    |    |    |  |  |
|     |          |                | 456 | P.07/99 (Izin peruntukan penggn tanah)                                                                                                                |                      |   |   |   |   |   |   |   |   |   | ✓  |    |    |    |    |  |  |
|     |          |                | 457 | P.09/99 (Retri IMB)                                                                                                                                   | ✓                    |   |   |   |   |   |   |   |   |   |    |    |    |    |    |  |  |
| 81  | BALI     | Kab. Bangli    | 458 | P.17/01 (Retri pasar hewan & biaya jual beli hewan)                                                                                                   |                      |   |   |   |   |   |   |   |   |   |    |    |    | ✓  |    |  |  |
|     |          |                | 459 | P.19/01 (Retri pasar)                                                                                                                                 | ✓                    |   |   |   |   |   |   |   |   |   |    |    |    |    |    |  |  |
| 82  | BALI     | Kab. Buleleng  | 460 | P.02/00 (Retri izin trayek)                                                                                                                           | ✓                    |   |   |   |   |   |   |   |   |   |    |    |    |    |    |  |  |
|     |          |                | 461 | P.05/00 (Retri izin usaha & izin UU Gg)                                                                                                               |                      |   |   |   |   |   |   |   |   | ✓ |    |    |    |    |    |  |  |
|     |          |                | 462 | P.09/00 (Retri rmh ptg hewan dan pengws lalin ternak)                                                                                                 |                      |   |   |   |   | ✓ |   |   |   |   | ✓  |    |    |    |    |  |  |
|     |          |                | 463 | P.10/00 (Retri terminal)                                                                                                                              |                      |   | ✓ | ✓ |   |   |   |   |   |   |    |    |    |    |    |  |  |
|     |          |                | 464 | P.07/01 (Retri & sewa pemakaian kekayaan daerah)                                                                                                      |                      |   | ✓ | ✓ |   |   |   |   |   |   |    |    |    |    |    |  |  |
| 83  | BALI     | Kab. Gianyar   | 465 | P.07/00 (Retri izin penebangan kayu & bambu rkyt)                                                                                                     |                      |   |   |   |   |   |   |   | ✓ |   |    |    |    |    |    |  |  |
|     |          |                | 466 | P.03/00 (Pajak reklame)                                                                                                                               |                      |   |   |   |   |   |   |   |   | ✓ |    |    |    |    |    |  |  |
|     |          |                | 467 | P.02/99 (PHR)                                                                                                                                         |                      |   | ✓ |   |   |   | ✓ |   |   |   |    |    |    |    |    |  |  |
|     |          |                | 468 | P.03/98 (Pajak pengmbln & penglln galian C)                                                                                                           |                      |   | ✓ |   |   |   |   |   |   |   |    |    |    |    |    |  |  |
|     |          |                | 469 | P.11/98 (PPJ)                                                                                                                                         |                      |   | ✓ |   |   |   |   |   |   |   | ✓  |    |    |    |    |  |  |
|     |          |                | 470 | P.13/98 (Retri IMB)                                                                                                                                   |                      |   | ✓ |   |   |   |   |   |   |   |    |    |    |    |    |  |  |
|     |          |                | 471 | P.17/96 (Retri pasar hewan & biaya surat jual-beli hewan)                                                                                             |                      |   | ✓ |   |   |   |   |   |   |   |    |    |    |    |    |  |  |
|     |          |                | 472 | P.04/94 (Izin trayek angktn penumpang umum)                                                                                                           |                      |   | ✓ |   |   |   |   |   |   |   |    |    |    |    |    |  |  |
|     |          |                | 473 | P.06/00 (Retri rumah potong hewan)                                                                                                                    |                      |   |   | ✓ |   |   | ✓ |   |   |   |    |    |    |    |    |  |  |
|     |          |                | 474 | P.05/00 (Retri izin tempat penjualan minuman beralkohol)                                                                                              | ✓                    |   |   |   |   |   |   |   |   |   |    |    |    |    |    |  |  |
| 84  | BALI     | Kab. Jembrana  | 475 | P.22/01 (Retri izin pemotongan ternak & penanganan daging serta hasil ikutannya)                                                                      |                      |   |   |   |   |   |   |   |   | ✓ |    |    |    |    |    |  |  |
|     |          |                | 476 | P.23/01 (Pajak Restoran)                                                                                                                              | ✓                    |   |   |   |   |   |   |   |   |   |    |    |    |    |    |  |  |
|     |          |                | 477 | P.24/01 (Retri pasar grosir pelalangan ikan)                                                                                                          | ✓                    |   |   |   |   |   |   |   |   |   |    |    |    |    |    |  |  |
|     |          |                | 478 | P.25/01 (Pajak hotel)                                                                                                                                 |                      |   |   |   |   |   | ✓ |   |   |   |    |    |    |    |    |  |  |
|     |          |                | 479 | P.26/01 (Retri pasar hewan)                                                                                                                           | ✓                    |   |   |   |   |   |   |   |   |   |    |    |    |    |    |  |  |
|     |          |                | 480 | P.27/01 (Retri izin usaha peternakan)                                                                                                                 | ✓                    |   |   |   |   |   |   |   |   |   |    |    |    |    |    |  |  |
|     |          |                | 481 | P.28/01 (Retri atas pengawasan & pengendalian mutu komoditas hasil pertanian, peternakan, perikanan, perhutanan, dan perkebunan serta hasil industri) | ✓                    |   |   |   |   |   |   |   |   |   |    |    |    |    |    |  |  |
| 85  | BALI     | Kab. Tabanan   | 482 | P.03/00 (Pengujian berkala kendr bermotor)                                                                                                            |                      |   |   | ✓ |   |   |   |   |   |   |    |    |    |    |    |  |  |
|     |          |                | 483 | P.04/00 (Retri dan pengelolaan terminal)                                                                                                              |                      |   |   | ✓ |   |   |   |   |   |   |    |    | ✓  |    |    |  |  |
|     |          |                | 484 | P.07/81 (Uang izin bangunan)                                                                                                                          |                      |   | ✓ |   |   |   |   |   |   |   |    |    |    |    |    |  |  |
|     |          |                | 485 | P.03/97 (Izin UU Gg)                                                                                                                                  |                      |   | ✓ |   |   |   |   |   |   |   |    |    |    |    |    |  |  |



| NO. | PROPINSI | KABUPATEN/KOTA  | No  | PERDA ATAU SK KEPDA                                                          | JENIS KEBERMASALAHAN |   |   |   |   |   |   |   |   |   |    |    |    |    |    |   |  |  |
|-----|----------|-----------------|-----|------------------------------------------------------------------------------|----------------------|---|---|---|---|---|---|---|---|---|----|----|----|----|----|---|--|--|
|     |          |                 |     |                                                                              | 0                    | 1 | 2 | 3 | 4 | 5 | 6 | 7 | 8 | 9 | 10 | 11 | 12 | 13 | 14 |   |  |  |
| 86  | BALI     | Kota Denpasar   | 486 | P.06/99 (Retri pasar)                                                        |                      |   | ✓ |   |   |   |   |   |   |   |    |    |    |    |    |   |  |  |
|     |          |                 | 487 | P.08/99 (Retri parkir di tepi jln umum)                                      |                      |   | ✓ |   |   |   |   |   |   |   |    |    |    |    |    |   |  |  |
|     |          |                 | 488 | P.04/01 (PHR)                                                                |                      |   |   |   | ✓ |   |   |   |   |   |    |    |    |    |    |   |  |  |
|     |          |                 | 489 | P.17/01 (Retri usaha perikanan)                                              |                      |   |   | ✓ | ✓ |   |   |   |   |   |    |    |    |    |    |   |  |  |
|     |          |                 | 490 | P.03/01 (Usaha pemondokan)                                                   |                      |   |   | ✓ |   | ✓ |   |   |   |   |    |    |    |    |    |   |  |  |
| 87  | KALBAR   | Kab. Kps Hulu   | 491 | P.06/01 (IMB)                                                                |                      |   | ✓ | ✓ | ✓ |   |   |   | ✓ |   |    |    |    |    |    |   |  |  |
|     |          |                 | 492 | P.11/00 (Pedomaan pengelolaan sarang walet)                                  |                      |   |   |   |   |   |   |   |   | ✓ | ✓  | ✓  |    |    |    |   |  |  |
| 88  | KALBAR   | Kab. Ketapang   | 493 | P.09/99 (Retri izin pengambilan hasil hutan ikutan)                          |                      |   |   | ✓ |   |   |   |   |   |   |    |    |    |    |    |   |  |  |
|     |          |                 | 494 | P.04/00 (Retri izin perutnukan penggn tanah)                                 |                      |   |   |   |   |   |   |   |   | ✓ |    |    |    |    |    |   |  |  |
|     |          |                 | 495 | P.07/00 (Retri IMB)                                                          |                      |   |   |   |   |   |   |   |   |   | ✓  |    |    |    |    |   |  |  |
|     |          |                 | 496 | P.05/00 (Retri izin terminal)                                                |                      |   |   |   |   |   |   |   |   |   | ✓  |    |    |    |    |   |  |  |
|     |          |                 | 497 | P.07/01 (Pajak parkir)                                                       |                      |   |   | ✓ | ✓ |   |   |   | ✓ |   |    |    |    |    |    |   |  |  |
| 89  | KALBAR   | Kab. Pontianak  | 498 | P.09/01 (Pungutan thd hasil TBS)                                             |                      |   |   |   |   |   |   |   |   |   |    | ✓  |    | ✓  |    |   |  |  |
|     |          |                 | 499 | P.10/01 (Pungutan thd hasil produksi minyak kelapa sawit (CPO) & sawit inti) |                      |   |   |   |   |   |   |   |   |   |    |    | ✓  |    | ✓  |   |  |  |
|     |          |                 | 500 | P.03/00 (Retri IMB)                                                          | ✓                    |   |   |   |   |   |   |   |   |   |    |    |    |    |    |   |  |  |
|     |          |                 | 501 | P.04/00 (Retri parkir)                                                       |                      |   |   |   |   |   |   |   |   |   | ✓  |    |    |    |    |   |  |  |
|     |          |                 | 502 | P.07/00 (Retri rumah potong hewan)                                           |                      |   |   |   |   |   |   |   |   | ✓ |    |    |    |    |    | ✓ |  |  |
|     |          |                 | 503 | P.08/00 (Retri pasar)                                                        | ✓                    |   |   |   |   |   |   |   |   |   |    |    |    |    |    |   |  |  |
|     |          |                 | 504 | P.19/01 (Retri peredaran hasil hutan & hasil hutan iktn)                     |                      |   |   |   |   |   |   |   |   | ✓ |    |    |    | ✓  |    | ✓ |  |  |
| 90  | KALBAR   | Kab. Sambas     | 505 | P.20/01 (Retri pengganti nilai tegakan)                                      |                      |   |   |   |   |   |   |   |   |   |    |    |    | ✓  |    |   |  |  |
|     |          |                 | 506 | P.23/01 (Retri pemeriksaan ternak)                                           |                      |   |   |   |   |   |   |   |   |   |    |    |    | ✓  |    |   |  |  |
|     |          |                 | 507 | P.03/98 (Pajak pengmbln & penglln galian C)                                  |                      |   |   | ✓ |   | ✓ |   |   |   |   |    |    |    |    |    |   |  |  |
|     |          |                 | 508 | P.02/00 (Retri pasar grosir atau pertokoan)                                  |                      |   |   |   |   |   | ✓ |   |   |   | ✓  |    |    |    |    |   |  |  |
|     |          |                 | 509 | P.03/00 (RIG)                                                                |                      |   |   |   |   |   |   |   |   |   | ✓  |    |    |    |    |   |  |  |
|     |          |                 | 510 | P.12/98 (Pajak parkir)                                                       |                      |   |   | ✓ |   |   |   |   |   |   |    |    |    |    |    |   |  |  |
|     |          |                 | 511 | P.11/98 (Retri pasar)                                                        |                      |   |   | ✓ |   |   |   |   |   |   |    |    |    |    |    |   |  |  |
|     |          |                 | 512 | P.05/98 (PPJ)                                                                |                      |   |   | ✓ |   |   |   |   |   |   | ✓  |    |    |    |    |   |  |  |
| 91  | KALBAR   | Kab. Sanggau    | 513 | P.04/98 (PHR)                                                                |                      |   | ✓ |   |   |   |   |   |   |   |    |    |    |    |    |   |  |  |
|     |          |                 | 514 | P.02/98 (Pajak pemanfaatn air bawah tanah & permkn)                          |                      |   | ✓ |   |   |   |   |   |   |   |    |    |    |    | ✓  | ✓ |  |  |
|     |          |                 | 515 | P.04/00 (Retri IMB)                                                          |                      |   |   |   |   |   |   |   |   |   | ✓  |    |    |    |    |   |  |  |
|     |          |                 | 516 | P.09/00 (Retri Angkutan TBS, kelapa sawit & CPO)                             |                      |   |   |   |   |   |   |   |   |   |    |    |    |    |    | ✓ |  |  |
|     |          |                 | 517 | P.13/00 (Retri pmtgn hewan & lalin hewan)                                    |                      |   |   |   | ✓ |   |   |   |   |   |    |    |    | ✓  |    |   |  |  |
|     |          |                 | 518 | P.03/00 (Retri pasar)                                                        |                      |   | ✓ | ✓ |   |   |   |   |   |   |    |    |    |    |    |   |  |  |
| 92  | KALTENG  | Kab. Barito Sel | 519 | P.05/00 (Retri izin trayek)                                                  |                      | ✓ | ✓ |   | ✓ |   |   |   |   |   |    |    |    |    |    |   |  |  |
|     |          |                 | 520 | P.07/00 (Retri pemakaian kekayaan daerah)                                    |                      | ✓ | ✓ |   |   |   |   |   |   |   |    |    |    |    |    |   |  |  |
|     |          |                 | 521 | P.13/02 (Retri usaha perfilman dan infokom)                                  |                      | ✓ |   |   |   |   |   |   |   | ✓ |    |    |    |    |    |   |  |  |

| NO. | PROPINSI | KABUPATEN/KOTA    | No  | PERDA ATAU SK KEPDA                                                                            | JENIS KEBERMASALAHAN |   |   |   |   |   |   |   |   |   |    |    |    |    |    |  |
|-----|----------|-------------------|-----|------------------------------------------------------------------------------------------------|----------------------|---|---|---|---|---|---|---|---|---|----|----|----|----|----|--|
|     |          |                   |     |                                                                                                | 0                    | 1 | 2 | 3 | 4 | 5 | 6 | 7 | 8 | 9 | 10 | 11 | 12 | 13 | 14 |  |
| 93  | KALTENG  | Kab. Barito Utara | 522 | P.08/02 (Izin pemungutan hasil hutan)                                                          |                      |   |   |   |   |   |   |   |   | ✓ |    |    |    |    |    |  |
|     |          |                   | 523 | P.09/02 (Izin usaha pemnftn hasil hutan kayu pada hutan alam produksi)                         |                      |   |   |   |   |   |   |   |   | ✓ |    |    |    |    |    |  |
|     |          |                   | 524 | P.11/02 (Hak pengusahaan hutan)                                                                | ✓                    |   |   |   |   |   |   |   |   |   |    |    |    |    |    |  |
| 93  | KALTENG  | Kab. Barito Utara | 525 | P.04/99 (Retri pasar)                                                                          |                      |   |   | ✓ |   |   |   |   |   |   |    |    |    |    |    |  |
|     |          |                   | 526 | P.05/00 (Retri terminal angkut penumpang & barang)                                             |                      |   |   |   |   | ✓ |   |   |   |   |    |    |    |    |    |  |
|     |          |                   | 527 | P.06/00 (Retri tmp tambat kapal)                                                               |                      |   |   |   |   |   |   |   | ✓ |   |    | ✓  |    |    |    |  |
| 94  | KALTENG  | Kab. Kapuas       | 528 | P.06/00 (Pungutan daerah & penyetoran iuran kehutanan dari hak IPHH berupa kayu)               |                      |   | ✓ |   |   |   |   |   | ✓ |   |    |    |    |    |    |  |
|     |          |                   | 529 | P.11/00 (Izin industri kayu)                                                                   |                      |   |   | ✓ |   |   |   |   | ✓ |   |    |    |    |    |    |  |
|     |          |                   | 530 | P.14/00 (Pengangkutan & penjualan hasil pertanian & industri ke laur wilayah Kab. Kapuas)      |                      |   | ✓ | ✓ |   |   |   |   | ✓ |   |    | ✓  |    |    |    |  |
|     |          |                   | 531 | P.10/00 (Pungutan daerah atas pengangkutan atau penjualan kayu keluar daerah kabupaten kapuas) |                      | ✓ |   |   |   |   |   |   |   |   |    |    | ✓  |    |    |  |
|     |          |                   | 532 | P.12/00 (Penertiban dan pungutan hasil hutan berupa kayu dari hasil pelelangan)                |                      |   |   |   |   |   |   |   |   |   |    | ✓  |    |    |    |  |
| 95  | KALSEL   | Kab. HSS          | 533 | P.05/00 (Tata cara pemungutan hasil hutan berupa kayu)                                         | ✓                    |   |   |   |   |   |   |   |   |   |    |    |    |    |    |  |
|     |          |                   | 534 | P.03/01 (Retri izin pemngtn hasil hutan pada hutan hak)                                        |                      |   |   |   |   | ✓ |   |   |   |   |    |    |    | ✓  |    |  |
|     |          |                   | 535 | P.10/01 (RIG)                                                                                  |                      |   |   |   |   |   |   |   |   |   | ✓  |    |    |    |    |  |
|     |          |                   | 536 | P.11/01 (Retri pasar grosir atau pertokoan)                                                    |                      |   |   |   |   |   |   |   |   |   | ✓  |    |    |    |    |  |
|     |          |                   | 537 | P.04/01 (Retri terminal)                                                                       |                      | ✓ |   |   |   |   |   |   |   |   | ✓  |    |    |    |    |  |
| 96  | KALSEL   | Kab. HST          | 538 | P.05/01 (Retri izin usaha beca)                                                                |                      |   |   |   |   |   |   | ✓ |   |   |    |    |    |    |    |  |
|     |          |                   | 539 | P.06/01 (Retri penguji kendaraan bermotor)                                                     |                      | ✓ |   |   |   |   |   |   |   |   |    |    |    |    |    |  |
|     |          |                   | 540 | P.10/01 (Pengelolaan pertambangan umum)                                                        | ✓                    |   |   |   |   |   |   |   |   |   |    |    |    |    |    |  |
|     |          |                   | 541 | P.10/99 (Retri izin trayek)                                                                    |                      | ✓ | ✓ |   |   |   |   |   |   |   |    |    |    |    |    |  |
|     |          |                   | 542 | P.07/99 (Retri pasar grosir atau pertokoan)                                                    |                      | ✓ | ✓ |   |   |   |   |   |   |   |    |    |    |    |    |  |
| 97  | KALSEL   | Kab. HSU          | 543 | P.06/99 (Retri pasar)                                                                          |                      |   | ✓ |   |   |   |   |   |   |   |    |    |    |    |    |  |
|     |          |                   | 544 | P.05/99 (Retri tempat khusus parkir)                                                           |                      |   | ✓ |   |   |   |   |   |   |   |    |    |    |    |    |  |
|     |          |                   | 545 | P.33/01 (Retri pemakaian toko milik pemerintah)                                                | ✓                    |   |   |   |   |   |   |   |   |   |    |    |    |    |    |  |
|     |          |                   | 546 | P.02/00 (Retri terminal)                                                                       |                      |   | ✓ |   |   |   |   |   |   |   |    |    |    |    |    |  |
|     |          |                   | 547 | P.03/00 (Retri izin trayek & operasi angkutan orang)                                           |                      |   | ✓ |   |   |   |   |   |   |   |    |    |    |    |    |  |
| 98  | KALSEL   | Kab. Tabalong     | 548 | P.09/01 (Pajak parkir)                                                                         |                      |   | ✓ |   |   |   |   |   |   |   |    |    |    |    |    |  |
|     |          |                   | 549 | P.10/01 (Pajak hotel)                                                                          |                      |   | ✓ |   |   |   |   |   |   |   |    |    |    |    |    |  |
|     |          |                   | 550 | P.11/01 (Pajak restoran)                                                                       |                      |   | ✓ |   |   |   |   |   |   |   |    |    |    |    |    |  |
|     |          |                   | 551 | P.30/95 (Pemngtnn retri thd pemberian izin pembukaan tanah)                                    |                      |   | ✓ |   |   |   |   |   |   |   |    |    |    |    |    |  |
| 99  | KALSEL   | Kab. Tanah laut   | 552 | P.02/98 (Pajak pengambln galian C)                                                             |                      |   | ✓ |   |   |   |   |   |   |   |    |    |    |    |    |  |
|     |          |                   | 553 | P.13/98 (RIG)                                                                                  |                      |   | ✓ |   |   |   |   |   |   |   | ✓  |    |    |    |    |  |
|     |          |                   | 554 | P.08/99 (Retri pasar grosir atau pertokoan)                                                    |                      |   | ✓ | ✓ |   |   |   |   |   |   | ✓  |    |    |    |    |  |

| NO. | PROPINSI | KABUPATEN/KOTA  | No  | PERDA ATAU SK KEPDA                                                                                      | JENIS KEBERMASALAHAN |   |   |   |   |   |   |   |   |   |    |    |    |    |    |   |  |
|-----|----------|-----------------|-----|----------------------------------------------------------------------------------------------------------|----------------------|---|---|---|---|---|---|---|---|---|----|----|----|----|----|---|--|
|     |          |                 |     |                                                                                                          | 0                    | 1 | 2 | 3 | 4 | 5 | 6 | 7 | 8 | 9 | 10 | 11 | 12 | 13 | 14 |   |  |
| 100 | KALSEL   | Kab. Tapin      | 555 | P.05/00 (Sumbangan Pihak Ketiga Atas Hasil Tambang Batubara yang Dibawah ke luar dari Areal Pertambangan |                      |   |   |   |   |   |   |   |   |   | ✓  |    |    | ✓  |    |   |  |
|     |          |                 | 556 | P.04/00 (Pemb & pengelolaan jalan perusahaan)                                                            |                      |   |   |   |   | ✓ |   |   | ✓ | ✓ |    |    |    |    |    |   |  |
|     |          |                 | 557 | P.05/00 (Pengujian kendaraan bermotor)                                                                   | ✓                    |   |   |   |   |   |   |   |   |   |    |    |    |    |    |   |  |
|     |          |                 | 558 | P.04/01 (Retri pemakaian kekayaan daerah)                                                                |                      |   |   |   | ✓ |   |   |   |   |   |    |    |    |    |    |   |  |
| 101 | KALTIM   | Kab. Berau      | 559 | P.21/00 (Penggelln & pengusaha sarang burung walet)                                                      | ✓                    |   |   |   |   |   |   |   |   |   |    |    |    |    |    |   |  |
| 102 | KALTIM   | Kab. Kutai      | 560 | P.36/00 (Usaha perikanan)                                                                                |                      |   |   |   |   | ✓ |   |   |   |   |    |    |    |    |    |   |  |
|     |          |                 | 561 | P.12/01 (Izin mempekerjakan WNA pendatang)                                                               |                      |   |   | ✓ |   |   |   |   |   |   |    |    |    | ✓  | ✓  |   |  |
|     |          |                 | 562 | P.09/01 (Izin usaha industri)                                                                            |                      |   |   |   |   |   |   |   |   | ✓ |    |    |    |    |    | ✓ |  |
|     |          |                 | 563 | P.07/01 (Pengyel pengusaha migas)                                                                        |                      |   |   |   |   |   |   |   |   |   |    |    |    |    | ✓  |   |  |
|     |          |                 | 564 | P.14/01 (Izin pemanfaatan hasil hutan bukan kayu)                                                        |                      |   |   |   |   |   | ✓ |   |   | ✓ |    |    |    |    |    |   |  |
|     |          |                 | 565 | P.25/00 (PPJ)                                                                                            |                      |   |   | ✓ |   |   |   |   |   | ✓ |    |    |    |    |    |   |  |
|     |          |                 | 566 | P.24/00 (Pajak Reklame)                                                                                  |                      |   |   | ✓ |   |   |   |   |   |   |    |    |    |    |    |   |  |
| 103 | KALTIM   | Kab. Pasir      | 567 | P.13/99 (Retri IMB)                                                                                      |                      |   |   |   |   |   |   |   |   |   | ✓  |    |    |    |    |   |  |
|     |          |                 | 568 | P.18/99 (Retri penggtn biaya cetak peta)                                                                 |                      |   |   |   |   |   |   |   |   |   |    | ✓  |    |    |    |   |  |
|     |          |                 | 569 | P.16/99 (Retri tmpt pendaratan kapal)                                                                    |                      |   |   | ✓ |   |   |   |   |   |   |    |    |    |    |    |   |  |
|     |          |                 | 570 | P.11/99 (PPJ)                                                                                            |                      |   |   | ✓ |   |   |   |   |   |   |    |    | ✓  |    |    |   |  |
|     |          |                 | 571 | P.12/99 (PHR)                                                                                            |                      |   |   | ✓ |   |   | ✓ |   |   |   |    |    |    |    |    |   |  |
| 104 | KALTIM   | Kota Balikpapan | 572 | P.22/00 (Retri pasar)                                                                                    |                      |   |   |   |   |   |   |   |   | ✓ |    |    |    |    |    |   |  |
|     |          |                 | 573 | P.27/00 (Izin operasional tmp pendrtn kapal perikanan)                                                   |                      |   |   |   |   |   |   |   |   | ✓ | ✓  |    |    |    |    |   |  |
|     |          |                 | 574 | P.29/00 (Izin pengmln & penglhn galian C)                                                                |                      |   |   |   |   |   | ✓ |   |   | ✓ |    |    |    |    |    |   |  |
|     |          |                 | 575 | P.34/00 (Pengurusan & pembinaan pasar)                                                                   |                      |   |   |   |   |   |   |   |   | ✓ |    |    |    |    |    |   |  |
|     |          |                 | 576 | P.36/00 (Sumb pihak ketiga)                                                                              |                      |   |   |   |   |   |   |   |   | ✓ | ✓  |    |    |    |    |   |  |
|     |          |                 | 577 | P.21/00 (Retri tmp pendaratan kapal perikanan)                                                           |                      |   |   |   | ✓ |   |   |   |   |   |    |    | ✓  |    |    |   |  |
|     |          |                 | 578 | P.20/97 (Pajak pengmln & penglhn galian C)                                                               |                      |   |   | ✓ |   |   |   |   |   |   |    |    |    |    |    |   |  |
| 105 | KALTIM   | Kota Samarinda  | 579 | P.05/98 (PHR)                                                                                            |                      |   |   | ✓ |   |   |   |   |   |   |    |    |    |    |    |   |  |
|     |          |                 | 580 | P.06/98 (PPJ)                                                                                            |                      |   |   | ✓ |   |   |   |   |   |   |    | ✓  |    |    |    |   |  |
|     |          |                 | 581 | P.07/98 (Pajak pengmln & penglhn galian C)                                                               |                      |   |   | ✓ |   |   |   |   |   |   |    |    |    |    |    |   |  |
| 106 | SULUT    | Kab. Minahasa   | 582 | P.07/99 (Retri pasar)                                                                                    |                      |   |   | ✓ |   |   |   |   |   |   |    |    |    |    |    |   |  |
|     |          |                 | 583 | P.09/99 (Retri rumah potong hewan)                                                                       |                      |   |   |   |   |   |   |   |   |   |    |    |    |    | ✓  |   |  |
|     |          |                 | 584 | P.10/99 (RIG)                                                                                            |                      |   |   |   |   |   |   |   |   |   |    |    | ✓  |    |    |   |  |
|     |          |                 | 585 | P.30/00 (Pungutan perikanan)                                                                             |                      |   |   |   | ✓ |   |   |   |   |   |    |    |    |    |    |   |  |
|     |          |                 | 586 | P.29/00 (Retri tempat pendrtn kapal)                                                                     |                      |   |   |   |   |   |   |   |   |   |    |    | ✓  |    |    |   |  |
|     |          |                 | 587 | P.05/00 (Retribusi izin tempat penjualan minuman beralkohol)                                             | ✓                    |   |   |   |   |   |   |   |   |   |    |    |    |    |    |   |  |
| 107 | SULUT    | Sangihe Talaud  | 588 | P.07/01 (Usaha perikanan)                                                                                |                      |   |   |   |   |   |   |   |   |   |    |    |    | ✓  |    |   |  |
|     |          |                 | 589 | P.08/01 (Retribusi pelelangan ikan dan penertiban/ pengendalian hasil perikanan)                         | ✓                    |   |   |   |   |   |   |   |   |   |    |    |    |    |    |   |  |

| NO. | PROPINSI  | KABUPATEN/KOTA | No  | PERDA ATAU SK KEPDA                                                        | JENIS KEBERMASALAHAN |   |   |   |   |   |   |   |   |   |    |    |    |    |    |   |
|-----|-----------|----------------|-----|----------------------------------------------------------------------------|----------------------|---|---|---|---|---|---|---|---|---|----|----|----|----|----|---|
|     |           |                |     |                                                                            | 0                    | 1 | 2 | 3 | 4 | 5 | 6 | 7 | 8 | 9 | 10 | 11 | 12 | 13 | 14 |   |
| 108 | SULUT     | Kota Bitung    | 590 | P.05/02 (Retribusi izin trayek , izin usaha angkutan dan kartu pengawasan) |                      |   |   | ✓ |   |   |   |   |   |   |    |    | ✓  |    |    |   |
|     |           |                | 591 | P.11/02 (Usaha pertambangan bahan galian gol C)                            |                      |   |   | ✓ |   |   |   |   |   |   |    |    |    | ✓  |    |   |
|     |           |                | 592 | P.09/00 (Retri perikanan)                                                  |                      |   |   |   |   |   |   |   |   | ✓ |    |    |    |    |    | ✓ |
|     |           |                | 593 | P.10/00 (Penerimaan sumbangan pihak ketiga kepada Pemerintah Daerah)       |                      |   |   |   |   |   |   |   |   |   | ✓  |    |    |    | ✓  |   |
|     |           |                | 594 | P.18/01 (Retribusi pertambangan dan energi Kota Bitung)                    |                      |   |   | ✓ |   |   |   |   |   |   |    |    |    |    | ✓  |   |
| 109 | SULUT     | Kota Manado    | 595 | P.06/02 (Pajak hotel)                                                      | ✓                    |   |   |   |   |   |   |   |   |   |    |    |    |    |    |   |
|     |           |                | 596 | P.10/02 (Retri pengamanan/pengawasan agribisnis)                           |                      |   |   |   |   |   |   |   | ✓ |   |    |    |    | ✓  |    |   |
|     |           |                | 597 | P.14/02 (Retri pelayanan pengusaha kecil dan menengah)                     |                      |   |   |   |   |   |   |   | ✓ | ✓ |    |    |    |    |    |   |
|     |           |                | 598 | P.16/02 (Retri perlindungan Hub.Kerja)                                     |                      |   |   |   |   |   | ✓ | ✓ |   |   |    |    |    |    |    | ✓ |
|     |           |                | 599 | P.07/02 (Pajak restoran)                                                   | ✓                    |   |   |   |   |   |   |   |   |   |    |    |    |    |    |   |
| 110 | GORONTALO | Kab. Gorontalo | 600 | P.09/00 (Retri izin peruntukan penggn tanah)                               |                      |   |   |   |   |   |   |   |   |   |    |    | ✓  |    |    |   |
|     |           |                | 601 | P.12/00 (Retri izin pengmlan hasil hutan ikutan)                           |                      |   |   |   |   |   | ✓ |   |   |   |    |    |    |    |    |   |
|     |           |                | 602 | P.13/00 (Sumb pihak ketiga)                                                | ✓                    |   |   |   |   |   |   |   |   |   |    |    |    |    |    |   |
|     |           |                | 603 | P.62/00 (Retri izin pengolahan & penjualan kayu bakar)                     |                      |   |   |   |   |   | ✓ |   |   |   |    |    |    |    | ✓  |   |
|     |           |                | 604 | P.63/00 (Retri izin pemilikan & penggnan gergaji rantai)                   |                      |   |   |   |   |   | ✓ |   |   |   |    |    |    |    |    |   |
|     |           |                | 605 | P.65/00 (Retri pengamanan & pembinaan usaha perkb)                         |                      |   |   |   |   |   |   |   |   |   | ✓  | ✓  |    |    |    |   |
|     |           |                | 606 | P.67/00 (Retri izin penangkapan & budidaya ikan di danau Limboto)          |                      |   |   |   |   |   |   |   | ✓ |   |    |    |    |    | ✓  |   |
| 111 | GORONTALO | Kota Gorontalo | 607 | P.06/01 (Retri pemakaian kekayaan daerah)                                  | ✓                    |   |   |   |   |   |   |   |   |   |    |    |    |    |    |   |
|     |           |                | 608 | P.08/00 (Retri tempat khusus parkir)                                       | ✓                    |   |   |   |   |   |   |   |   |   |    |    |    |    |    |   |
|     |           |                | 609 | P.06/00 (Retri pasar)                                                      | ✓                    |   |   |   |   |   |   |   |   |   |    |    |    |    |    |   |
|     |           |                | 610 | P.04/00 (Retri izin trayek)                                                | ✓                    |   |   |   |   |   |   |   |   |   |    |    |    |    |    |   |
|     |           |                | 611 | P.01/00 (Retri pasar grosir atau pertokoan)                                | ✓                    |   |   |   |   |   |   |   |   |   |    |    |    |    |    |   |
|     |           |                | 612 | P.07/00 (Retri parkir di tepi jalan umum)                                  | ✓                    |   |   |   |   |   |   |   |   |   |    |    |    |    |    |   |
|     |           |                | 613 | SK 1157/01 (Penerbitan surat izin usaha jasa konstruksi)                   |                      |   |   |   |   |   |   |   |   |   |    |    |    |    |    | ✓ |
| 112 | SULTENG   | Kab. Banggai   | 614 | P.08/00 (RIG)                                                              |                      |   |   |   |   |   |   |   |   |   |    |    |    | ✓  |    |   |
|     |           |                | 615 | P.02/00 (Retri pasar grosir atau pertokoan)                                |                      |   |   |   |   |   | ✓ | ✓ |   |   |    |    |    |    |    |   |
|     |           |                | 616 | P.10/00 (Retri tmp pendrtm kapal)                                          | ✓                    |   |   |   |   |   |   |   |   |   |    |    |    |    |    |   |
| 113 | SULTENG   | Kab. Tolitoli  | 617 | P.11/99 (Retri pasar grosir atau pertokoan)                                |                      |   |   | ✓ |   |   |   |   |   |   |    |    |    |    |    |   |
|     |           |                | 618 | P.03/01 (Retribusi Terminal Angkutan Darat)                                |                      | ✓ | ✓ |   |   |   |   |   |   |   |    |    |    |    |    |   |
|     |           |                | 619 | P.04/01 (Retribusi Izin Trayek)                                            |                      | ✓ | ✓ |   |   |   |   |   |   |   |    |    |    |    |    |   |
| 114 | SULTENG   | Kab. Donggala  | 620 | P.04/00 (RIG)                                                              |                      |   |   |   |   |   |   |   |   |   |    |    |    | ✓  |    |   |
|     |           |                | 621 | P.05/00 (Retri IMB)                                                        |                      | ✓ | ✓ |   |   |   |   |   |   |   |    |    |    |    |    |   |
|     |           |                | 622 | P.02/00 (Retribusi Parkir Di Tepi Jalan Umum)                              |                      | ✓ | ✓ |   |   |   |   |   |   |   |    |    |    |    |    |   |
| 115 | SULTENG   | Kab. Morowali  | 623 | P.59/01 (Retri tmp pendaratan kapal)                                       | ✓                    |   |   |   |   |   |   |   |   |   |    |    |    |    |    |   |
|     |           |                | 624 | P.66/01 (Izin pemilikan & pemakaian grji rantai)                           |                      | ✓ |   |   |   |   |   |   |   |   |    |    |    | ✓  |    |   |
|     |           |                | 625 | P.68/01 ( Penerimaan sumb pihak ketiga)                                    |                      | ✓ |   |   |   |   |   |   |   |   |    |    |    |    | ✓  |   |

| NO. | PROPINSI | KABUPATEN/KOTA   | No  | PERDA ATAU SK KEPDA                                                                                                       | JENIS KEBERMASALAHAN |   |   |   |   |   |   |   |   |   |    |    |    |    |    |
|-----|----------|------------------|-----|---------------------------------------------------------------------------------------------------------------------------|----------------------|---|---|---|---|---|---|---|---|---|----|----|----|----|----|
|     |          |                  |     |                                                                                                                           | 0                    | 1 | 2 | 3 | 4 | 5 | 6 | 7 | 8 | 9 | 10 | 11 | 12 | 13 | 14 |
|     |          |                  | 626 | P.57/01 (Retri pemotongan hewan ternak)                                                                                   |                      |   |   |   |   |   |   |   | ✓ |   |    |    |    |    |    |
|     |          |                  | 627 | P.41/01 (PR)                                                                                                              | ✓                    |   |   |   |   |   |   |   |   |   |    |    |    |    |    |
|     |          |                  | 628 | P.42/01 (PH)                                                                                                              |                      |   |   |   |   | ✓ |   |   |   |   |    |    |    |    |    |
|     |          |                  | 629 | P.43/01 (PPJ)                                                                                                             |                      |   |   |   |   |   |   |   | ✓ |   |    |    |    |    |    |
|     |          |                  | 630 | P.46/01 (Pajak pengabl galian C)                                                                                          | ✓                    |   |   |   |   |   |   |   |   |   |    |    |    |    |    |
|     |          |                  | 631 | P.49/01 (Retri izin peruntukan penggn tanah)                                                                              | ✓                    |   |   |   |   |   |   |   |   |   |    |    |    |    |    |
|     |          |                  | 632 | P.50/01 (Retri IG)                                                                                                        |                      |   |   |   |   |   |   |   |   |   |    |    |    |    | ✓  |
|     |          |                  | 633 | P.57/01 (Retri pemotgan hewan ternak)                                                                                     |                      |   |   |   |   |   |   |   |   |   |    |    | ✓  | ✓  | ✓  |
| 116 | SULTENG  | Kab. Poso        | 634 | P.07/00 (Penerimaan sumb pihak ketiga                                                                                     |                      |   |   | ✓ |   |   |   |   |   |   |    |    |    | ✓  |    |
|     |          |                  | 635 | P.23/01 (Pemanfaatan hutan & pemgtn hasil htn)                                                                            |                      |   |   | ✓ |   |   |   |   | ✓ |   |    |    |    |    | ✓  |
|     |          |                  | 636 | P.24/01 IPHHK & IPHHBK serta IPK                                                                                          |                      |   |   | ✓ |   |   |   |   | ✓ |   |    |    |    |    |    |
|     |          |                  | 637 | P.25/01 (Retri izin usaha perikanan)                                                                                      |                      |   |   |   |   |   |   |   | ✓ |   |    |    |    |    |    |
|     |          |                  | 638 | P.26/01 (Pajak alat penangkapan ikan)                                                                                     |                      |   |   |   |   |   |   |   | ✓ |   |    |    |    |    |    |
|     |          |                  | 639 | P.30/01 (Izin pemilikan & penggnan gergaji rnti)                                                                          |                      |   |   | ✓ |   |   |   | ✓ | ✓ |   |    |    |    |    |    |
| 117 | SULRA    | Kab. Buton       | 640 | P.06/00 (Retri izin trayek)                                                                                               | ✓                    |   |   |   |   |   |   |   |   |   |    |    |    |    |    |
|     |          |                  | 641 | P.05/00 (RIG)                                                                                                             | ✓                    |   |   |   |   |   |   |   |   |   |    |    |    |    |    |
|     |          |                  | 642 | P.09/00 (Retri izin peruntukan penggunaan tanah)                                                                          |                      |   |   |   |   |   |   |   | ✓ |   |    |    |    |    |    |
| 118 | SULSEL   | Kab. Luwu        | 643 | P.04/00 (Retri pasar atau pertokoan)                                                                                      | ✓                    |   |   |   |   |   |   |   |   |   |    |    |    |    |    |
|     |          |                  | 644 | P.05/00 (RIG)                                                                                                             |                      |   |   |   |   |   |   |   | ✓ |   |    |    |    |    |    |
|     |          |                  | 645 | P.06/00 (Retri IMB)                                                                                                       | ✓                    |   |   |   |   |   |   |   |   |   |    |    |    |    |    |
| 119 | SULRA    | Kab. Kolaka      | 646 | P.08/95 & SK 74/00 (Retri pengeluaran hasil pertanian                                                                     |                      |   | ✓ |   |   |   |   | ✓ |   |   | ✓  |    |    |    |    |
| 120 | SULSEL   | Kab. Majene      | 647 | SK 169/00 (Tata cara Pemungutan Retribusi Izin Trayek dan Prosedur Administrasi Pemberian Izin Trayek)                    |                      |   |   |   |   |   |   |   | ✓ |   |    |    |    |    |    |
|     |          |                  | 648 | SK 373/01 (Penerimaan Sumbangan Pihak Ketiga dari Perusahaan, Koperasi atau Perorangan yg Bergerak di Bidang Hasil Hutan) |                      |   |   |   |   |   |   |   |   |   |    |    |    | ✓  |    |
| 121 | SULSEL   | Kab. Pangkajene  | 649 | P.11/01 (Retri izin peruntukan penggunaan tanah)                                                                          |                      |   |   |   |   |   |   |   | ✓ |   |    |    |    |    |    |
|     |          |                  | 650 | (Rretribusi jasa pelabuhan sungai dan tempat pendaratan kapal)                                                            | ✓                    |   |   |   |   |   |   |   |   |   |    |    |    |    |    |
|     |          |                  | 651 | (Retribusi pengujian kendaraan bermotor)                                                                                  | ✓                    |   |   |   |   |   |   |   |   |   |    |    |    |    |    |
| 122 | SULSEL   | Kab. Pinrang     | 652 | P.01/00 (Retri rumah potong hewan)                                                                                        |                      |   |   |   |   |   |   |   | ✓ |   |    |    |    |    |    |
|     |          |                  | 653 | P.02/02 (Retri izin pengabl hasil hutan ikutan)                                                                           |                      |   |   |   |   |   |   |   |   | ✓ |    |    |    |    |    |
|     |          |                  | 654 | P.12/90 (Pajak galian C)                                                                                                  | ✓                    |   |   |   |   |   |   |   |   |   |    |    |    |    |    |
|     |          |                  | 655 | P.05/00 (Retri tempat parkir)                                                                                             | ✓                    |   |   |   |   |   |   |   |   |   |    |    |    |    |    |
| 123 | SULSEL   | Kab. Tana Toraja | 656 | P.06/00 (Retri pasar)                                                                                                     | ✓                    |   |   |   |   |   |   |   |   |   |    |    |    |    |    |
|     |          |                  | 657 | P.09/00 (Retri izin peruntukan penggn tanah)                                                                              |                      |   |   |   |   |   |   |   |   | ✓ |    |    |    |    |    |
|     |          |                  | 658 | P.12/00 (Retri pasar grosir)                                                                                              |                      |   |   |   | ✓ | ✓ |   |   | ✓ |   |    |    |    |    |    |
|     |          |                  | 659 | P.03/96 (Penerimaan sumb pihak ketiga)                                                                                    |                      |   | ✓ |   |   |   |   |   |   |   |    |    |    | ✓  |    |
| 124 | SULSEL   | Kota Parepare    | 660 | P.05/99 (Retri rumah potong hewan)                                                                                        |                      |   | ✓ |   |   |   |   |   | ✓ |   |    |    |    |    |    |



| NO. | PROPINSI                              | KABUPATEN/KOTA    | No  | PERDA ATAU SK KEPDA                                                                                                                                | JENIS KEBERMASALAHAN |   |   |   |   |   |   |   |   |   |    |    |    |    |    |   |  |
|-----|---------------------------------------|-------------------|-----|----------------------------------------------------------------------------------------------------------------------------------------------------|----------------------|---|---|---|---|---|---|---|---|---|----|----|----|----|----|---|--|
|     |                                       |                   |     |                                                                                                                                                    | 0                    | 1 | 2 | 3 | 4 | 5 | 6 | 7 | 8 | 9 | 10 | 11 | 12 | 13 | 14 |   |  |
|     |                                       |                   | 661 | P.06/99 (Retri izin tempat penjil minuman beralkohol)                                                                                              |                      |   | ✓ |   |   |   |   |   | ✓ |   |    |    |    |    |    |   |  |
|     |                                       |                   | 662 | P.04/99 (Retri izin gangguan)                                                                                                                      |                      |   |   |   |   |   |   |   |   | ✓ |    |    |    |    |    |   |  |
|     |                                       |                   | 663 | P.09/99 (IMB)                                                                                                                                      |                      |   |   |   |   |   |   |   |   |   | ✓  |    |    |    |    |   |  |
|     |                                       |                   | 664 | P.12/99 (Retri izin peruntukan pengg. tanah)                                                                                                       |                      |   |   |   |   |   |   |   |   |   | ✓  |    |    |    |    |   |  |
| 125 | NTB                                   | Kab. Bima         | 665 | P.03/00 (Retri tempat khusus parkir)                                                                                                               |                      |   |   |   |   |   |   |   | ✓ | ✓ |    |    |    |    |    |   |  |
|     |                                       |                   | 666 | P.04/00 (Pengelolaan & pengusahaan sarang burung walet)                                                                                            | ✓                    |   |   |   |   |   |   |   |   |   |    |    |    |    |    |   |  |
|     |                                       |                   | 667 | P.14/00 (Retri pemakaian kekayaan daerah)                                                                                                          | ✓                    |   |   |   |   |   |   |   |   |   |    |    |    |    |    |   |  |
| 126 | NTB                                   | Kab. Lombok Barat | 668 | P.21/01 (Retri surat IIPHH bukan kayu & Retri HH bukan kayu)                                                                                       |                      |   |   | ✓ | ✓ |   |   |   | ✓ |   |    |    |    |    |    |   |  |
|     |                                       |                   | 669 | P.14/00 (Usaha perikanan)                                                                                                                          |                      |   |   |   |   |   |   |   |   | ✓ |    | ✓  |    |    |    |   |  |
|     |                                       |                   | 670 | P.17/00 (Retri pasar ternak)                                                                                                                       |                      |   |   | ✓ |   |   |   |   |   |   |    |    |    |    |    |   |  |
|     |                                       |                   | 671 | P.01/00 (Retri IMB)                                                                                                                                | ✓                    |   |   |   |   |   |   |   |   |   |    |    |    |    |    |   |  |
|     |                                       |                   | 672 | P.14/01 (Usaha perikanan)                                                                                                                          |                      |   |   |   |   |   |   |   |   |   | ✓  |    | ✓  |    |    |   |  |
|     |                                       |                   | 673 | P.15/01 (Pungutan hasil perikanan)                                                                                                                 |                      |   |   |   |   |   |   |   |   |   |    | ✓  |    |    | ✓  |   |  |
|     |                                       |                   | 674 | P.16/01 (Retri kartu pemilikan ternak)                                                                                                             |                      |   |   |   |   |   |   |   |   |   |    | ✓  |    |    | ✓  |   |  |
| 675 | P.19/01 (Retri pelyn kesehatan hewan) | ✓                 |     |                                                                                                                                                    |                      |   |   |   |   |   |   |   |   |   |    |    |    |    |    |   |  |
| 127 | NTB                                   | Kota Mataram      | 676 | P.01/00 (PHR)                                                                                                                                      | ✓                    |   |   |   |   |   |   |   |   |   |    |    |    |    |    |   |  |
|     |                                       |                   | 677 | P.03/00 (Retri pasar)                                                                                                                              | ✓                    |   |   |   |   |   |   |   |   |   |    |    |    |    |    |   |  |
|     |                                       |                   | 678 | P.22/01 (RIG)                                                                                                                                      |                      |   |   |   |   |   |   |   |   | ✓ |    | ✓  |    |    |    |   |  |
|     |                                       |                   | 679 | P.03/01 (Retri izin usaha perdagangan)                                                                                                             |                      |   |   |   |   |   |   |   |   | ✓ | ✓  |    |    |    |    |   |  |
|     |                                       |                   | 680 | P.04/01 (Retri izin usaha perindustrian)                                                                                                           |                      |   |   |   |   |   |   |   |   |   |    |    |    |    |    | ✓ |  |
| 128 | NTT                                   | Kab. Ende         | 681 | P.11/00 (Retri izin trayek)                                                                                                                        | ✓                    |   |   |   |   |   |   |   |   |   |    |    |    |    |    |   |  |
|     |                                       |                   | 682 | P.13/00 (Retri parkir di tepi jalan umum)                                                                                                          | ✓                    |   |   |   |   |   |   |   |   |   |    |    |    |    |    |   |  |
| 129 | NTT                                   | Kab. Flores Timur | 683 | P.06/00 (RIG)                                                                                                                                      |                      |   |   |   |   |   |   |   |   | ✓ |    |    |    |    |    |   |  |
|     |                                       |                   | 684 | P.02/00 (Sumb atas pengumpulan & pengeluaran hasil pertanian, perkebunan, peternakan, perikanan dan hasil laut, kehutanan dan hasil perindustrian) |                      |   |   |   |   |   |   |   |   |   | ✓  |    |    |    | ✓  |   |  |
|     |                                       |                   | 685 | P.04/00 (PPJ)                                                                                                                                      |                      |   | ✓ |   |   |   |   |   |   |   | ✓  |    |    |    |    |   |  |
|     |                                       |                   | 686 | P.05/00 (Retri pengujian berkala kendrn bermotor)                                                                                                  |                      |   | ✓ |   |   |   |   |   |   |   |    |    |    |    |    |   |  |
| 130 | NTT                                   | Kab. TTS          | 687 | P.08/00 (Retri penjualan prod usaha daerah)                                                                                                        |                      |   |   | ✓ |   |   |   |   | ✓ |   |    |    |    |    |    |   |  |
|     |                                       |                   | 688 | P.07/00 (Retri pemakaian kekayaan daerah)                                                                                                          | ✓                    |   |   |   |   |   |   |   |   |   |    |    |    |    |    |   |  |
|     |                                       |                   | 689 | P.40/01 (Retri izin budidaya ikan)                                                                                                                 |                      |   |   |   |   |   |   |   |   |   |    | ✓  |    |    | ✓  |   |  |
| 131 | NTT                                   | Kab. TTU          | 690 | P.01/01 (Retri terminal)                                                                                                                           |                      |   |   |   |   |   |   |   | ✓ |   |    |    |    |    |    |   |  |
|     |                                       |                   | 691 | P.02/01 (Retri pengujian kendrn bermotor)                                                                                                          | ✓                    |   |   |   |   |   |   |   |   |   |    |    |    |    |    |   |  |
|     |                                       |                   | 692 | P.40/01 (Retri izin budidaya ikan)                                                                                                                 |                      |   |   |   |   |   |   |   |   |   |    | ✓  |    |    | ✓  |   |  |
|     |                                       |                   | 693 | P.41/01 (Retri izin penangkapan ikan)                                                                                                              | ✓                    |   |   |   |   |   |   |   |   |   |    |    |    |    |    |   |  |
| 132 | NTT                                   | Kota Kupang       | 694 | P.05/00 (Angkot di Kota Kupang)                                                                                                                    | ✓                    |   |   |   |   |   |   |   |   |   |    |    |    |    |    |   |  |
|     |                                       |                   | 695 | P.18/00 (Pengujian berkala kendrn bermotor)                                                                                                        |                      |   |   |   |   |   |   |   |   |   | ✓  |    |    |    |    |   |  |

| NO.                                             | PROPINSI | KABUPATEN/KOTA | No  | PERDA ATAU SK KEPDA                                                                                  | JENIS KEBERMASALAHAN |     |      |     |     |     |     |     |      |     |     |     |     |     |     |
|-------------------------------------------------|----------|----------------|-----|------------------------------------------------------------------------------------------------------|----------------------|-----|------|-----|-----|-----|-----|-----|------|-----|-----|-----|-----|-----|-----|
|                                                 |          |                |     |                                                                                                      | 0                    | 1   | 2    | 3   | 4   | 5   | 6   | 7   | 8    | 9   | 10  | 11  | 12  | 13  | 14  |
|                                                 |          |                | 696 | P.04/01 (Surat izin usaha perdagangan)                                                               |                      |     |      |     |     |     |     |     | ✓    |     |     |     |     |     |     |
|                                                 |          |                | 697 | P.06/01 (Izin usaha industri & tanda daftar industri)                                                |                      |     |      | ✓   |     |     |     |     | ✓    |     |     |     |     |     |     |
|                                                 |          |                | 698 | P.10/01 (Penyelenggaraan wajib daftar perusahaan)                                                    |                      |     |      |     |     |     |     |     | ✓    |     |     |     |     |     |     |
|                                                 |          |                | 699 | P.11/01 (Retri perizinan usaha perikanan)                                                            |                      |     |      |     |     | ✓   |     |     | ✓    |     |     |     |     |     |     |
|                                                 |          |                | 700 | P.05/01 (Surat izin usaha perdagangan minuman beralkohol)                                            |                      |     |      |     |     |     |     |     |      |     |     |     |     | ✓   |     |
| 133                                             | PAPUA    | Kab. Fak Fak   | 701 | P.05/00 (Retri izin pengambilan hasil hutan ikutan)                                                  |                      |     |      |     |     |     |     |     | ✓    | ✓   |     |     |     |     |     |
|                                                 |          |                | 702 | P.06/00 (Izin Gg)                                                                                    |                      |     |      |     |     | ✓   |     |     | ✓    | ✓   |     |     |     |     |     |
|                                                 |          |                | 703 | P.03/00 (Retri pemakaian kekayaan daerah)                                                            |                      |     |      | ✓   |     |     |     |     |      |     |     |     |     |     |     |
|                                                 |          |                | 704 | P.04/00 (Retri izin tmp penjualan minuman beralkhl)                                                  |                      |     |      | ✓   |     |     |     |     | ✓    |     |     |     |     |     |     |
| 134                                             | PAPUA    | Kab. Manokwari | 705 | P.04/98 (Pajak pengambilan galian C)                                                                 |                      |     |      | ✓   |     |     |     |     |      |     |     |     |     |     |     |
|                                                 |          |                | 706 | P.05/98 (PPJ)                                                                                        |                      |     |      | ✓   |     |     |     |     | ✓    |     |     |     |     |     |     |
|                                                 |          |                | 707 | SK 224/98 (Standar Kompensasi bagi masya adat atas kayu yang dipungut pada areal hak ulayat)         |                      |     |      | ✓   |     |     |     |     | ✓    |     |     |     |     |     |     |
|                                                 |          |                | 708 | P.05/90 (Pajak potong hewan)                                                                         |                      |     |      | ✓   |     |     |     |     | ✓    |     |     |     |     | ✓   | ✓   |
|                                                 |          |                | 709 | P.09/90 (Retri izin usaha perdagangan hewan, bahan asal hewan, pemotongan hewan dan sarana produksi) |                      |     |      | ✓   |     |     |     |     | ✓    |     |     |     |     | ✓   | ✓   |
| <b>JUMLAH PELANGGARAN PER JENIS PELANGGARAN</b> |          |                |     |                                                                                                      | 152                  | 30  | 162  | 58  | 32  | 76  | 5   | 81  | 234  | 46  | 24  | 9   | 95  | 11  | 15  |
| <b>PROSENTASE</b>                               |          |                |     |                                                                                                      | 14.8                 | 2.9 | 15.7 | 5.6 | 3.1 | 7.4 | 0.5 | 7.9 | 22.7 | 4.5 | 2.3 | 0.9 | 9.2 | 1.1 | 1.5 |

### KETERANGAN JENIS KEBERMASALAHAN:

#### TIDAK BERMASALAH

0 : Secara umum tidak bermasalah

#### KRITERIA YURIDIS

- 1 : Relevansi acuan yuridis  
 2 : Up to date acuan yuridis  
 3 : Kelengkapan yuridis formal

#### KRITERIA SUBSTANSI

- 4 : Diskoneksi tujuan & isi, konsistensi psl  
 5 : Kejelasan obyek  
 6 : Kejelasan subyek  
 7 : Tak jelas hak & kewj wajib pungut atau pemda  
 8 : Kejelasan standar waktu, biaya dan prosedur; atau struktur & standar tarif  
 9 : Kesesuaian filosofi dan prinsip pungutan

#### KRITERIA PRINSIP

- 10 : Keutuhan wil eko nasional dan prinsip free internal trade  
 11 : Persaingan sehat  
 12 : Dampak ekonomi negatif  
 13 : Menghalangi akses masyarakat & kepent. umum (lingk. hidup)  
 14 : Pelanggaran kewenangan pemerintahan
