# Supplementary material for: Democratization, leader education and growth: firm-level evidence from Indonesia
Source: Springer Nature journal article supplement (doi:10.1007/s10887-022-09221-5), 2023-02-15
Supplement: MOESM2 [file rating2003.pdf › Data/KPPOD/rating2003.pdf]

## Regional Investment Attractiveness A Survey of Business Perception

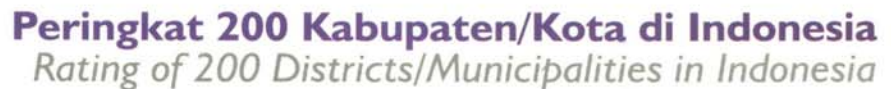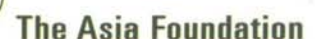

# TIM PENELITIAN

## *Research Team*

---

### **Koordinator Peneliti/*Principal Investigator:***

P. Agung Pambudhi, MM

### **Nara Sumber/*Resource Persons:***

Dr. Bambang P.S. Brodjonegoro

Dr. Hadi Soesastro

Dr. Djisman Simanjuntak

### **Anggota Peneliti/*Research Associates:***

Sigit Murwito, S.Sos

Robert EndiJaweng S.IP

Sri Mulyono, MSs

Agus Widodo, S.Sos

### **Peneliti Lapangan/*Area Researchers:***

Dr. Paulus Kindangen; Murbanto Sinaga, MA; M. Ridwan, ME

Idham Cholid, ME; Tauhid Achmad, ME; Gumpita, Msi

Imam Bachtiar, Msi; La Ode Asadi, Msi; Ir. Aris Yunanto

Erric Wijaya, ME; Zulfahmi, Msi; Westri Kekalih, ME

Ir. Dahri Tanjung; Yose Rizal Damuri, MA; Ari Perdana M.Ec.Dev

Ir. M. Rizal Farid; Aan Eko Widiarto, SH; M. Amir Arham, Msi

Yosefina Anggraini, S.Sos; Sukasmanto, SE;

### **Asisten Peneliti/*Research Assistants:***

Regina Retno Budiastuti, SH

F. Sundoko

Kurniawaty Septiany Musdar

# KATA PENGANTAR

## *Acknowledgement*

Tiga tahun perjalanan otonomi daerah (otda) ditandai dengan berbagai peristiwa penting, positif maupun negatif, yang dapat digunakan sebagai acuan evaluasi guna perbaikan pelaksanaan otda. Dari segi positif, terlihat adanya *political will* beberapa daerah untuk melibatkan masyarakat dalam perencanaan pembangunan daerah, juga muncul upaya perbaikan pelayanan publik (usaha) dengan menerapkan sistem pelayanan satu atap/terpadu. Sayangnya sisi negatif otonomi daerah justru lebih mendominasi, diantaranya tentang perebutan kewenangan antar daerah-daerah otonom dengan pemerintah pusat, hubungan tidak harmonis antara Kabupaten/Kota dengan Propinsi, politik uang dalam pemilihan kepala daerah, pertentangan eksekutif dan legislatif, arogansi pimpinan daerah, pemekaran wilayah yang sangat pesat dan kontroversial, kebijakan daerah yang mendorong ekonomi biaya tinggi, dan berbagai peristiwa lainnya.

KPPOD (Komite Pemantauan Pelaksanaan Otonomi Daerah) yang hadir sepanjang usia otda tersebut, berusaha mewujudkan visinya untuk ikut serta menciptakan iklim usaha yang kondusif di era otonomi ini melalui berbagai kegiatan yang dilakukannya. Dalam salah satu kegiatan tahunannya, KPPOD mengadakan penelitian mengenai "Pemeringkatan Daya Tarik Investasi Kabupaten/Kota Tahun 2003" yang meliputi 156 Kabupaten dan 44 Kota di Indonesia. Kegiatan tersebut merupakan pemeringkatan ketiga, setelah sebelumnya melaksanakannya di 90 Kabupaten/Kota di tahun 2001 dan 134 Kabupaten/Kota di tahun 2002.

Selain untuk referensi para pelaku usaha dalam mempertimbangkan keputusan investasinya, kegiatan tersebut juga dimaksudkan untuk mendorong kompetisi yang sehat antar daerah-daerah otonom dalam memfasilitasi

*The three-year journey of regional autonomy (otda) is characterized by a range of important events, negative or positive, which can be used as reference for evaluation of decentralization for better implementation. On the positive side, we can see the growing political will in some regions to involve the public in planning the development of their areas. Likewise, there are efforts to improve public service by applying one-stop/integrated license and permit systems. Unfortunately, the negative aspects of regional autonomy are indeed more dominant, such as, among others, competition over authority between autonomous regions and the central government, inharmonious relationship between District/Municipality and Provinces, money politics in the election of heads of regions, conflict between the executive and legislative, arrogance of regional leaders, speedy and controversial expansion of territory, local regulation creating high-cost economics, and other numerous effects.*

KPPOD (Komite Pemantauan Pelaksanaan Otonomi Daerah/Regional Autonomy Watch), which has existed for as long as regional autonomy, is seeking to realize its vision of partaking in the creation of a conducive business climate in the era of autonomy through various activities. As one of its annual activities, KPPOD conducted a "Rating on Investment Attractiveness of Districts/Municipalities for Year 2003" covering 156 Districts and 44 Municipalities in Indonesia. The study is the third rating; the first was in 2001 covering 90 Districts/Municipalities while the second was in 2002 with 134 Districts/Municipalities.

*Apart from being a reference for investors in weighing investment decisions, this activity is intended to induce healthy competition among autonomous regions in facilitating economic activities. Likewise, the activity is expected to become one of the means to assist prin-*

aktivitas perekonomian. Antusiasme kalangan dunia usaha untuk mempelajari hasil penelitian tersebut di tahun-tahun sebelumnya dan beragam tanggapan dari daerah-daerah otonom, serta liputan media yang luas semakin mendorong KPPOD untuk melakukan kegiatan tersebut secara reguler. Dari kegiatan itu diharapkan menjadi salah satu alat bantu bagi pihak-pihak yang berkepentingan untuk melakukan evaluasi terhadap pelaksanaan otda yang sedang dan akan terus berlangsung.

Dalam penelitian di tahun 2003 ini, kriteria yang digunakan untuk menilai daya tarik investasi daerah dipertahankan sama dengan kriteria yang digunakan tahun 2002 yang terdiri dari 5 faktor, 14 variabel dan 42 indikator; demikian juga dengan bobot masing-masing kriteria. Hal itu dimaksudkan untuk dapat melihat perkembangan daya tarik investasi daerah dari tahun ke tahun.

Pelaksanaan studi tersebut yang dilaksanakan oleh tim peneliti tetap KPPOD juga didukung sejumlah nara sumber dan para koordinator peneliti daerah dari berbagai institusi penelitian dan perguruan tinggi, serta para *Interviewer* di masing-masing daerah penelitian. Meskipun berbagai upaya telah dilakukan untuk meningkatkan kualitas hasil studi (evaluasi internal maupun adopsi dari berbagai kritik dan saran pada pemeringkatan tahun sebelumnya), kelemahan-kelemahan masih sangat mungkin terjadi. Oleh karena itu kami akan sangat berterimakasih apabila ada masukan dari para pembaca untuk tujuan perbaikan kualitas studi, dan terutama agar hasil pemeringkatan yang disosialisasikan secara luas dapat memberi kontribusi positif bagi masyarakat.

Kami mengucapkan terimakasih banyak kepada para responden pelaku usaha yang memberikan input utama dalam penelitian ini, pemerintah daerah di daerah penelitian yang telah memberikan data-data pendukung yang diperlukan, begitu juga kepada Departemen Dalam Negeri cq. Dirjen Otonomi Daerah yang mendukung kegiatan tahunan KPPOD ini.

*cial parties to evaluate the regional autonomy. The enthusiasm of the business community regarding the research in previous years and a mixture of comments from autonomous regions, as well as the wide media coverage spurred by the study, drive KPPOD to do the same activity regularly.*

*In this year's research, the criteria used to assess the investment attractiveness of regions is the same as the criteria used in year 2002 consisting of 5 factors, 14 variables and 42 indicators; the same applies to the weight of each criterion. This was done purposely to show the development of investment attractiveness of regions from year to year.*

*This study, which is conducted by the same research team from KPPOD, is supported by a number of resource persons, area researchers/coordinators from various research institutions and research academe, as well as interviewers from each research area. Even though various efforts have been made to increase the quality of the result of this study (responding to internal evaluation and suggestions and critics over the rating of previous years), weaknesses are still inevitable. Accordingly, we appreciate it very much if there are inputs from our readers to enhance the quality of this study, and if there are efforts to widely disseminate this study as a positive contribution to society.*

*We express our deep gratitude to our respondents from the business community who provided us first-hand input, to local governments that shared supporting data with us, and to the Ministry of Home Affairs, especially the Directorate General for Regional Autonomy, that supported the activity of KPPOD this year.*

Atas Nama Tim Peneliti/On behalf of the Research Team  
Koordinator/Principal Investigator  
**P. Agung Pambudhi**



# DAFTAR ISI

## *Table of Contents*

|     |                                                                                                                                      |
|-----|--------------------------------------------------------------------------------------------------------------------------------------|
| i   | <b>JUDUL PENELITIAN / Title</b>                                                                                                      |
| iii | <b>TIM PENELITI / Research Team</b>                                                                                                  |
| v   | <b>KATA PENGANTAR / Acknowledgement</b>                                                                                              |
| vii | <b>DAFTAR ISI / Table of Contents</b>                                                                                                |
| ix  | <b>DAFTAR GAMBAR / List of Diagram</b>                                                                                               |
| xi  | <b>DAFTAR LAMPIRAN / List of Appendix</b>                                                                                            |
| 1   | <b>BAB.I PENDAHULUAN / Introduction</b>                                                                                              |
| 1   | A. LATAR BELAKANG / Background                                                                                                       |
| 3   | B. TUJUAN PENELITIAN / Purpose of Study                                                                                              |
| 3   | C. SIGNIFIKANSI PENELITIAN / Significance of Study                                                                                   |
| 5   | <b>BAB. II KERANGKA PEMIKIRAN / Analytical Framework</b>                                                                             |
| 6   | A. FAKTOR KELEMBAGAAN / Regulation and Government Service                                                                            |
| 9   | B. FAKTOR SOSIAL POLITIK / Socio-Political Factor                                                                                    |
| 10  | C. FAKTOR EKONOMI DAERAH / Factor of Regional Economic Dynamism                                                                      |
| 11  | D. FAKTOR TENAGA KERJA DAN PRODUKTIVITAS / Factor of Labor & Productivity                                                            |
| 12  | E. FAKTOR INFRASTRUKTUR FISIK / Factor of Physical Infrastructure                                                                    |
| 15  | <b>BAB. III METODOLOGI / Research Methodology</b>                                                                                    |
| 15  | A. RUANG LINGKUP PENELITIAN / Research Scope                                                                                         |
| 16  | B. DATA PENELITIAN / Research Data                                                                                                   |
| 16  | B.1. Jenis Data / Types of Data                                                                                                      |
| 17  | B.2. Pengumpulan Data / Data Collection                                                                                              |
| 19  | B.3. Pengolahan dan Analisis Data / Data Processing and Analysis                                                                     |
| 23  | <b>BAB. IV PEMAPARAN HASIL PENELITIAN</b>                                                                                            |
| 23  | A. PERINGKAT DAYA TARIK INVESTASI DAERAH                                                                                             |
| 24  | A.1. Peringkat Daerah Berdasarkan Nilai Total / General Ranking of Regions                                                           |
| 24  | A.1.1. Peringkat Kabupaten Secara Umum / General Ranking of District                                                                 |
| 27  | A.1.2. Peringkat Kota Secara Umum / General Ranking of Municipalities                                                                |
| 29  | A.2. Peringkat Daerah Berdasarkan Faktor Kelembagaan / The Regulation & Government Service Factor                                    |
| 30  | A.2.1. Peringkat Kabupaten Berdasarkan Faktor Kelembagaan / Ranking of District Based on The Regulation & Government Service Factor  |
| 32  | A.2.2. Peringkat Kota Berdasarkan Faktor Kelembagaan / Ranking of Municipalities Based on The Regulation & Government Service Factor |
| 34  | A.3. Peringkat Daerah Berdasarkan Faktor Sosial Politik / The Socio-Political Factor                                                 |
| 35  | A.3.1. Peringkat Kabupaten Berdasarkan Faktor Sosial Politik / Ranking of Districts Based on The Socio-Political Factor              |
| 37  | A.3.2. Peringkat Kota Berdasarkan Faktor Sosial Politik / Ranking of Municipalities Based on Socio-Political Factor                  |
| 39  | A.4. Peringkat Daerah Berdasarkan Faktor Ekonomi Daerah / The Regional Economic Dynamism Factor                                      |
| 40  | A.4.1. Peringkat Kabupaten Berdasarkan Faktor Ekonomi Daerah / Ranking of District Based on The Regional Economic Dynamism Factor    |

|    |                                                                                                                                                         |
|----|---------------------------------------------------------------------------------------------------------------------------------------------------------|
| 42 | A.4.2. Peringkat Kota Berdasarkan Faktor Ekonomi Daerah / <i>Ranking of Municipalities Based on The Regional Economic Dynamism Factor</i>               |
| 43 | A.5. Peringkat Daerah Berdasarkan Faktor Tenaga Kerja dan Produktivitas / <i>The Labor &amp; Productivity Factor</i>                                    |
| 44 | A.5.1. Peringkat Kabupaten Berdasarkan Faktor Tenaga Kerja dan Produktivitas / <i>Ranking of District Based on The Labor &amp; Productivity Factor</i>  |
| 46 | A.5.2. Peringkat Kota Berdasarkan Faktor Tenaga Kerja dan Produktivitas / <i>Ranking of Municipalities Based on The Labor &amp; Productivity Factor</i> |
| 47 | A.6. Peringkat Daerah Berdasarkan Faktor Infrastruktur Fisik / <i>The Physical Infrastructure</i>                                                       |
| 48 | A.6.1. Peringkat Kabupaten Berdasarkan Faktor Infrastruktur Fisik / <i>Ranking of District Based on The Physical Infrastructure</i>                     |
| 51 | A.6.2. Peringkat Kota Berdasarkan Faktor Infrastruktur Fisik / <i>Ranking of Municipalities Based on The Physical Infrastructure</i>                    |
| 52 | B. PERUBAHAN PERINGKAT 2002 – 2003                                                                                                                      |
| 53 | B.1. Perubahan Peringkat Kabupaten / <i>Changes to the Ranking of Districts</i>                                                                         |
| 53 | B.1.1. Kelompok 10 Daerah Kabupaten Peringkat Teratas / <i>Districts in the Top Ten Ranks</i>                                                           |
| 57 | B.1.2. Kelompok 10 Daerah Kabupaten Peringkat Terbawah / <i>Districts in the Bottom Ten Ranks</i>                                                       |
| 60 | B.2. Perubahan Peringkat Kota / <i>Changes to the Rankings of Municipalities</i>                                                                        |
| 61 | B.2.1. Kelompok 5 Daerah Kota Peringkat Teratas / <i>Municipalities in the Top Five Ranks</i>                                                           |
| 62 | B.2.2. Kelompok 10 Daerah Kota Peringkat Bawah / <i>Municipalities in the Bottom Five Ranks</i>                                                         |
| 66 | C. PERMASALAHAN DILUAR PERINGKAT                                                                                                                        |
| 66 | C.1. PERMASALAHAN PADA FAKTOR KELAMBAGAN / <i>Problems Related to the Regulation &amp; Government Services Factor</i>                                   |
| 66 | C.1.1. Biaya-Biaya Tidak Resmi / <i>Illegal Fees</i>                                                                                                    |
| 69 | C.1.2. Pelayanan Birokrasi / <i>The Quality of the Civil Service</i>                                                                                    |
| 71 | C.1.3. Peraturan Daerah / <i>Local Regulations</i>                                                                                                      |
| 72 | C.2. PERMASALAHAN PADA FAKTOR SOSIAL POLITIK / <i>Problems Related to the Socio-Political Factor</i>                                                    |
| 72 | C.2.1. Pelibatan Pelaku Usaha dalam Perumusan Kebijakan Daerah / <i>The Involvement of the Business Community in Formulating Local Policies</i>         |
| 73 | C.2.2. Mekanisme Pengawasan Kebijakan Pemda Oleh Masyarakat / <i>The Mechanism for Public Oversight of Local Policy</i>                                 |
| 73 | C.2.3. Keamanan / <i>Security</i>                                                                                                                       |
| 75 | C.2.4. Konflik Sosial / <i>Social Conflicts</i>                                                                                                         |
| 75 | C.2.5. Konflik Politik / <i>Political Conflicts</i>                                                                                                     |
| 76 | C.2.6. Keterbukaan Masyarakat / <i>Public Openness</i>                                                                                                  |
| 77 | C.2.7. Intensitas Unjuk Rasa / <i>Strikes</i>                                                                                                           |
| 77 | C.3. PERMASALAHAN YANG BERKAITAN DENGAN EKONOMI DAERAH / <i>Problems Related to the Regional Economic Dynamism Factor</i>                               |
| 78 | C.4. PERMASALAHAN TENAGA KERJA / <i>Problems Related to the Labor &amp; Productivity Factor</i>                                                         |
| 78 | C.4.1. Kualitas Tenaga Kerja / <i>The Quality of the Labor Force</i>                                                                                    |
| 79 | C.4.2. Produktivitas Tenaga Kerja / <i>Labor Productivity</i>                                                                                           |
| 80 | C.5. PERMASALAHAN INFRASTRUKTUR FISIK / <i>Problems Related to the Physical Infrastructure Factor</i>                                                   |
| 80 | C.5.1. Jalan Darat / <i>Roads</i>                                                                                                                       |
| 82 | C.5.2. Listrik / <i>Electricity</i>                                                                                                                     |
| 82 | C.5.3. Telpon / <i>The Telephone System</i>                                                                                                             |
| 83 | BAB V. PENUTUP                                                                                                                                          |
| 83 | A. KESIMPULAN / <i>Conclusions</i>                                                                                                                      |
| 83 | A.1. PERINGKAT DAYA TARIK INVESTASI / <i>Ranking of Investment Attractiveness</i>                                                                       |
| 85 | A.2. IKLIM INVESTASI / <i>The Investment Climate</i>                                                                                                    |
| 87 | B. SARAN / <i>Recommendations</i>                                                                                                                       |
| 91 | LAMPIRAN / <i>Appendix</i>                                                                                                                              |

# DAFTAR GAMBAR

## List of Diagram

### Daftar Gambar

- 6 Diagram 1. Hirarki Faktor, Variabel, Indikator, dan Intensitas Pemeringkatan/*Rating Variable and Factors*  
Figure 1.
- 24 Diagram 2. Bobot Indikator Faktor Pemeringkatan/*Weight of Rating Factors*  
Figure 2.
- 30 Diagram 3. Bobot Indikator Faktor Kelembagaan / *Regulation & Government Service*  
Figure 3.
- 34 Diagram 4. Bobot Indikator Faktor Sosial Politik /*Socio-Political Factor*  
Figure 4.
- 39 Diagram 5. Bobot Indikator Faktor Ekonomi Daerah/*Regional Economic Dynamism*  
Figure 5.
- 44 Diagram 6. Bobot Indikator Faktor Tenaga Kerja dan Produktivitas/*Labor & Productivity*  
Figure 6.
- 48 Diagram 7. Bobot Indikator Faktor Infrastruktur Fisik/*Physical Infrastructure*  
Figure 7.
- 25 Grafik IV.1 : Peringkat Kabupaten Secara Umum /*General Ranking of District* (1.a. 10 Teratas/  
Chart IV.1. *The Highest Ten Districts* & 1.b. 10 Terbawah/*The Lowest Ten Districts*)
- 28 Grafik IV.2 : Peringkat Kota Secara Umum/*General Ranking of Municipalities* (2.a. 5 Teratas/  
Chart IV.2. *The Highest Five Municipalities* & 2.b. 5 Terbawah/*The Lowest Five Municipalities*)
- 31 Grafik IV.3 : Peringkat Kabupaten Berdasarkan Faktor Kelembagaan/*Rating of Districts Based*  
Chart IV.3. *on Region Regulation & Government Services* (1.a. 10 Teratas/*The Highest Ten Districts* & 1.b. 10 Terbawah/*The Lowest Ten Districts*)
- 33 Grafik IV.4 : Peringkat Kota Berdasarkan Faktor Kelembagaan /*Rating of Municipalities Based*  
Chart IV.4. *on Region Regulation & Government Services* (2.a. 5 Teratas/*The Highest Five Municipalities* & 2.b. 5 Terbawah/*The Lowest Five Municipalities*)
- 36 Grafik IV.5 : Peringkat Kabupaten Berdasarkan Faktor Sosial Politik/*Rating of Districts Based*  
Chart IV.5. *on Socio-Political Factor* (1.a. 10 Teratas/*The Highest Ten Districts* & 1.b. 10 Terbawah/*The Lowest Ten Districts*)
- 38 Grafik IV.6 : Peringkat Kota Berdasarkan Faktor Sosial Politik/*Rating of Municipalities Based*  
Chart IV.6. *on Socio-Political Factor* (2.a. 5 Teratas/*The Highest Five Municipalities* & 2.b. 5 Terbawah/*The Lowest Five Municipalities*)
- 40 Grafik IV.7 : Peringkat Kabupaten Berdasarkan Faktor Ekonomi Daerah/*Rating of Districts Based*  
Chart IV.7. *on Regional Economic Dynamism* (1.a. 10 Teratas/*The Highest Ten Districts* & 1.b. 10 Terbawah/*The Lowest Ten Districts*)
- 42 Grafik IV.8 : Peringkat Kota Berdasarkan Faktor Ekonomi Daerah/*Rating of Municipalities*  
Chart IV.8. *Based on Regional Economic Dynamism* (2.a. 5 Teratas/*The Highest Five Municipalities* & 2.b. 5 Terbawah/*The Lowest Five Municipalities*)
- 45 Grafik IV.9 : Peringkat Kabupaten Berdasarkan Faktor Tenaga Kerja dan Produktivitas/*Rating*  
Chart IV.9. *of Districts Based on Labor & Productivity* (1.a. 10 Teratas/*The Highest Ten Districts* & 1.b. 10 Terbawah/*The Lowest Ten Districts*)

- 47 Grafik IV.10 : Peringkat Kota Berdasarkan Faktor Tenaga Kerja dan Produktivitas/*Rating of Chart IV.10. Municipalities Based on Labor & Productivity* (2.a. 5 Teratas/*The Highest Five Municipalities* & 2.b. 5 Terbawah/*The Lowest Five Municipalities*)
- 50 Grafik IV.11 : Peringkat Kabupaten Berdasarkan Faktor Infrastruktur Fisik/*Rating of Districs Chart IV.11. Based on Physical Infrastructure* (1.a. 10 Teratas/*The Highest Ten Districts* & 1.b. 10 Terbawah/*The Lowest Ten Districts*)
- 51 Grafik IV.12 : Peringkat Kota Berdasarkan Faktor Infrastruktur Fisik/*Rating of Municipalities Chart IV.12. Based on Physical Infrastructure* (2.a. 5 Teratas/*The Highest Five Municipalities* & 2.b. 5 Terbawah/*The Lowest Five Municipalities*)

## Daftar Tabel

- 54 Tabel IV.1. Perubahan Peringkat 5 Kabupaten dari Kelompok 10 Kabupaten Peringkat Atas Pada Rating 2003/*Changes in the Rankings of Five of the Top Ten Districts in the 2003 Rating.*
- 55 Tabel IV.2. Perubahan Peringkat 6 Kabupaten dari Kelompok 10 Kabupaten Peringkat Atas Pada Rating 2002/*Changes in the Rankings of Six of the Top Ten Districts in the 2002 Rating.*
- 58 Tabel IV.3. Perubahan Peringkat 6 Kabupaten dari Kelompok 10 Kabupaten Peringkat Bawah Pada Rating 2003/*Changes in the Rankings of Six of the Bottom Ten Districts in the 2003 Rating.*
- 59 Tabel IV.4. Perubahan Peringkat 4 Kabupaten dari Kelompok 10 Kabupaten Peringkat Bawah Pada Rating 2002/*Changes in the Rankings of Four of the Bottom Ten Districts in the 2002 Rating.*
- 61 Tabel IV.5. Perubahan Peringkat 5 Kota dari Kelompok 5 Kota Peringkat Atas Pada Rating 2003/*Changes in the Rankings of Four of the Top Five Municipalities in the 2003 Rating.*
- 63 Tabel IV.6. Perubahan Peringkat 4 Kota dari Kelompok 5 Kota Peringkat Atas Pada Rating 2002/*Changes in the Rankings of Four of the Top Five Municipalities in the 2002 Rating.*
- 64 Tabel IV.7. Perubahan Peringkat 5 Kota dari Kelompok 5 Kota Peringkat Bawah Pada Rating 2003/*Changes in the Rankings of the Bottom Five Municipalities in the 2003 Rating.*
- 65 Tabel IV.8. Perubahan Peringkat 5 Kota dari Kelompok 5 Kota Peringkat Bawah Pada Rating 2002/*Changes in the Rankings of Three of the Bottom Five Municipalities in the 2002 Rating.*
- 80 Tabel IV.9. Ketersediaan dan Kualitas Jalan Darat 200 Kabupaten dan Kota di Indonesia/*Accessibility and Quality of Roads in 200 Districts and Municipalities in Indonesia.*



# DAFTAR LAMPIRAN

## *List of Appendix*

### **Lampiran 1. Hasil Pemeringkatan**

#### **1.1. Peringkat Kabupaten**

- 91 Lampiran 1.1.1. Peringkat Daya Tarik Investasi 156 Kabupaten di Indonesia
- 92 Lampiran 1.1.2. Neraca Peringkat Faktor & Variabel Daya Tarik Investasi 156 Kabupaten di Indonesia.
- 95 Lampiran 1.1.3. Peringkat Kabupaten Berdasarkan Faktor Kelembagaan
- 96 Lampiran 1.1.4. Peringkat Kabupaten Berdasarkan Faktor Sosial Politik
- 97 Lampiran 1.1.5. Peringkat Kabupaten Berdasarkan Faktor Ekonomi Daerah
- 98 Lampiran 1.1.6. Peringkat Kabupaten Berdasarkan Faktor Tenaga Kerja dan Produktivitas
- 99 Lampiran 1.1.7. Peringkat Kabupaten Berdasarkan Faktor Infrastruktur Fisik

#### **1.2. Peringkat Kota**

- 100 Lampiran 1.2.1. Peringkat Daya Tarik Investasi 44 Kota di Indonesia
- 101 Lampiran 1.2.2. Neraca Peringkat Faktor & Variabel Daya Tarik Investasi 44 Kota di Indonesia
- 102 Lampiran 1.2.3. Peringkat Kota Berdasarkan Faktor Kelembagaan
- 103 Lampiran 1.2.4. Peringkat Kota Berdasarkan Faktor Sosial Politik
- 104 Lampiran 1.2.5. Peringkat Kota Berdasarkan Faktor Ekonomi Daerah
- 105 Lampiran 1.2.6. Peringkat Kota Berdasarkan Faktor Tenaga Kerja dan Produktivitas
- 106 Lampiran 1.2.7. Peringkat Kota Berdasarkan Faktor Infrastruktur Fisik

#### **1.3. Perubahan Peringkat Kabupaten**

- 107 Lampiran 1.3.1. Perubahan Peringkat 10 Kabupaten dari Kelompok 10 Kabupaten Peringkat Atas Pada Rating 2003
- 109 Lampiran 1.3.2. Perubahan Peringkat 10 Kabupaten dari Kelompok 10 Kabupaten Peringkat Atas Pada Rating 2002
- 111 Lampiran 1.3.3. Perubahan Peringkat 10 Kabupaten dari Kelompok 10 Kabupaten Peringkat Bawah Pada Rating 2003
- 113 Lampiran 1.3.4. Perubahan Peringkat 10 Kabupaten dari Kelompok 10 Kabupaten Peringkat Bawah Pada Rating 2002

#### **1.4. Perubahan Peringkat Kota**

- 114 Lampiran 1.4.1. Perubahan Peringkat 5 Kota dari Kelompok 5 Kota Peringkat Atas Pada Rating 2003
- 116 Lampiran 1.4.2. Perubahan Peringkat 5 Kota dari Kelompok 5 Kota Peringkat Atas Pada Rating 2002
- 118 Lampiran 1.4.3. Perubahan Peringkat 5 Kota dari Kelompok 5 Kota Peringkat Bawah Pada Rating 2003
- 120 Lampiran 1.4.4. Perubahan Peringkat 5 Kota dari Kelompok 5 Kota Peringkat Bawah Pada Rating 2002

### **Lampiran 2. Daerah Penelitian**

- 123 Lampiran 2.1 Statistik Daerah Pemeringkatan Kabupaten dan Kota (Propinsi, Sektor Ekonomi Dominan; PDRB Perkapita)
- 124 Lampiran 2.2 Daftar 156 Kabupaten Pemeringkatan
- 127 Lampiran 2.3 Daftar 44 Kota Pemeringkatan

### **Lampiran 3. Data Penelitian**

|     |                          |                                                                                                              |
|-----|--------------------------|--------------------------------------------------------------------------------------------------------------|
| 128 | Lampiran 3.1             | Daftar Data, Jenis Data, dan Sumber Data Pemeringkatan                                                       |
|     | <b>Lampiran 4.</b>       | <b>Faktor, Variabel, dan Indikator , Intensitas Pemeringkatan :</b>                                          |
| 130 | Lampiran 4.1.            | Daftar Faktor, Variabel, dan Indikator Pemeringkatan                                                         |
| 133 | Lampiran 4.2.            | Metode Klasifikasi Intensitas Indikator Pemeringkatan                                                        |
|     | <b>Lampiran 4.3.</b>     | <b>Hasil Klasifikasi Indikator Pemeringkatan</b>                                                             |
|     | <b>Lampiran 4.3.1.</b>   | <b>Hasil Klasifikasi Indikator Faktor Kelembagaan</b>                                                        |
| 136 | Lampiran 4.3.1.1.        | Indikator Rasio Retribusi thd Pajak                                                                          |
| 140 | Lampiran 4.3.1.2.        | Indikator Rasio Anggaran Pembangunan thd APBD                                                                |
|     | <b>Lampiran 4.3.2.</b>   | <b>Hasil Klasifikasi Indikator Faktor Ekonomi Daerah</b>                                                     |
|     | <b>Lampiran 4.3.2.1.</b> | <b>Variabel Potensi Ekonomi</b>                                                                              |
| 144 | Lampiran 4.3.2.1.1.      | Indikator PDRB Perkapita                                                                                     |
| 148 | Lampiran 4.3.2.1.2.      | Indikator Pertumbuhan PDRB                                                                                   |
| 156 | Lampiran 4.3.2.1.3.      | Indikator Indeks Pembangunan Manusia                                                                         |
| 160 | Lampiran 4.3.2.2.        | Variabel Struktur Ekonomi                                                                                    |
|     | <b>Lampiran 4.3.3.</b>   | <b>Hasil Klasifikasi Indikator Faktor Tenaga Kerja dan Produktivitas</b>                                     |
|     | <b>Lampiran 4.3.3.1.</b> | <b>Variabel Ketersediaan Tenaga Kerja</b>                                                                    |
| 164 | Lampiran 4.3.3.1.1.      | Indikator Penduduk Usia Produktif                                                                            |
| 168 | Lampiran 4.3.3.1.2.      | Indikator Tenga Kerja Berijasah SLTP Berpengalaman                                                           |
| 172 | Lampiran 4.3.3.1.3.      | Indikator Rasio Pencari Kerja terhadap Angkatan Kerja                                                        |
|     | <b>Lampiran 4.3.3.2.</b> | <b>Variabel Biaya Tenaga Kerja</b>                                                                           |
| 176 | Lampiran 4.3.3.2.1.      | Indikator Biaya Tenaga Kerja Berdasarkan Aturan Formal                                                       |
| 180 | Lampiran 4.3.3.2.2.      | Indikator Biaya Tenaga Kerja Aktual                                                                          |
| 184 | Lampiran 4.3.3.3.        | Variabel Produktivitas Tenaga Kerja                                                                          |
| 188 | <b>Lampiran 4.4.</b>     | <b>Hirarki dan Bobot Faktor, Variabel, Indikator, Intensitas Pemeringkatan</b>                               |
| 193 | <b>Lampiran 4.5.</b>     | <b>Penghitungan Nilai/Score Intensitas dengan Metode AHP</b>                                                 |
|     | <b>Lampiran 4.6.</b>     | <b>Hasil Pembobotan (Score) Intensitas Indikator dengan Metode AHP</b>                                       |
|     | <b>Lampiran 4.6.1</b>    | <b>Hasil Pembobotan (Score) Intensitas Indikator dengan Metode AHP 156 Kabupaten di Indonesia</b>            |
| 195 | Lampiran 4.6.1.1.        | Hasil Pembobotan (Score) Indikator, Variabel, Faktor Kelembagaan 156 Kabupaten di Indonesia                  |
| 201 | Lampiran 4.6.1.2.        | Hasil Pembobotan (Score) Indikator, Variabel, Faktor Sosial Politik 156 Kabupaten di Indonesia               |
| 207 | Lampiran 4.6.1.3.        | Hasil Pembobotan (Score) Indikator, Variabel, Faktor Ekonomi Daerah 156 Kabupaten di Indonesia               |
| 213 | Lampiran 4.6.1.4.        | Hasil Pembobotan (Score) Indikator, Variabel, Faktor Tenaga Kerja & Produktivitas 156 Kabupaten di Indonesia |
| 219 | Lampiran 4.6.1.5.        | Hasil Pembobotan (Score) Indikator, Variabel, Faktor Infrastruktur Fisik 156 Kabupaten di Indonesia          |
|     | <b>Lampiran 4.6.2</b>    | <b>Hasil Pembobotan (Score) Intensitas Indikator dengan Metode AHP 44 Kota di Indonesia</b>                  |
| 225 | Lampiran 4.6.2.1.        | Hasil Pembobotan (Score) Indikator, Variabel, Faktor Kelembagaan 44 Kota di Indonesia                        |
| 227 | Lampiran 4.6.2.2.        | Hasil Pembobotan (Score) Indikator, Variabel, Faktor Sosial Politik 44 Kota di Indonesia                     |
| 229 | Lampiran 4.6.2.3.        | Hasil Pembobotan (Score) Indikator, Variabel, Faktor Ekonomi Daerah 44 Kota di Indonesia                     |
| 231 | Lampiran 4.6.2.4.        | Hasil Pembobotan (Score) Indikator, Variabel, Faktor Tenaga Kerja & Produktivitas 44 Kota di Indonesia       |
| 233 | Lampiran 4.6.2.5.        | Hasil Pembobotan (Score) Indikator, Variabel, Faktor Infrastruktur Fisik 44 Kota di Indonesia                |

## **Lampiran 5. Kajian Peraturan Daerah**

- 235 Lampiran 5.1. Panduan Kajian Peraturan Daerah  
238 Lampiran 5.2. Contoh Kajian Peraturan Daerah

# *Appendix*

- Appendix 3**      **Research Data**  
239 *Appendix 3.1*      *List of Data, Type of Data, and Source of Data Used in Rating*
- Appendix 4**      **Factor, Variables, and Indicators, Rating Intensity**  
241 *Appendix 4.1*      *List of Factors - VariableS - Indicators*  
244 *Appendix 4.2*      *Intensity Classification Method*  
247 *Appendix 4.5*      *Calculation of the Score of Indicators Using AHP Method*  
248 *Appendix 5.1*      *Guideline in Analyzing Regional Regulation*

# I. PENDAHULUAN

## Introduction

### A. Latar Belakang

Indikator makro ekonomi Indonesia selama tahun 2002 hingga awal semester pertama tahun 2003 menunjukkan perkembangan yang cukup memberikan harapan ditandai dengan pertumbuhan ekonomi mencapai 4%, konsumsi yang terus meningkat, ekspor yang terus tumbuh secara positif, kecenderungan penurunan laju inflasi, nilai tukar rupiah yang semakin menguat dan stabil, dan cadangan devisa yang terus meningkat, serta membaiknya indeks harga saham gabungan. Sementara untuk investasi, selama periode Januari-Mei 2003 mengalami kenaikan dengan laju pertumbuhan sebesar 84,8% dibandingkan dengan periode yang sama pada tahun 2002, dengan persetujuan investasi penanaman modal asing sebesar US\$ 4 miliar.

Melihat pada beberapa perbaikan indikator ekonomi di atas diharapkan tingkat *country risk* Indonesia akan membaik secara bertahap. Berdasarkan laporan Badan Pemeringkat Internasional (*Standart & Poor's*) tahun 2002, peringkat utang luar negeri jangka panjang Indonesia meningkat dari CCC+ menjadi B-, dan peringkat utang dalam negeri jangka panjang meningkat dari B- menjadi B. Hal ini dapat dijadikan indikasi bahwa perekonomian Indonesia semakin membaik, dan lebih jauh juga dapat dijadikan cermin bahwa Indonesia akan diminati investor.

Data BKPM menyebutkan selama Januari – Februari 2003, investasi asing langsung (FDI) yang disetujui adalah 146 proyek dengan nilai investasi US\$2,2857 miliar. Persetujuan BKPM tersebut lebih tinggi 138,4% dibandingkan dua bulan pertama

### A. Background

Macro-economic indicators in Indonesia for the entire year of 2002 until the beginning of the first semester of year 2003 signify some encouraging developments as they show economic growth of 4%, sustainable increase in consumption, continuing positive growth of exports, tendency of inflation rate to plummet, a stronger and more stable exchange rate of rupiah, and expanding foreign exchange reserve, as well as improvement in the price of consolidated index and shares. While on investment, for the whole period of January-May 2003, we experience a growth rate of 84.8% compared with the same period in the year 2002, with foreign capital investment approval amounting to US\$ 4 billion.

Looking at improvement of some economic indicators above we expect that the *country risk* ranking of Indonesia is gearing towards a gradual improvement. Based on the report of an International Rating Board (*Standard & Poor's*) for the year 2002, the ranking of long-term foreign debt of Indonesia climbs from CCC+ to B-, and the ranking of long-term domestic debt rises from B- to B. This indicates that the Indonesian economy is strengthening, and moreover it reflects that Indonesia can attract investors.

The Data from the Capital Investment Coordinating Board (BKPM) shows that from January – February 2003, the approved foreign direct investment (FDI) numbers were 146 projects with investment value of US\$2,2857 billion. The approval from BKPM is more

2002 yang tercatat hanya sebanyak US\$958,8 juta dengan jumlah proyek yang disetujui sebanyak 159 proyek. Sementara untuk persetujuan perluasan usaha adalah sebanyak 42 proyek PMA yang sudah ada, dengan nilai investasi US\$148,4 juta. Data jumlah izin usaha tetap yang diberikan kepada PMA Januari adalah sebanyak 33 proyek dengan realisasi investasi US\$63,3 juta. Izin usaha tetap adalah izin yang wajib dimiliki oleh perusahaan untuk melaksanakan kegiatan produksi komersial baik barang maupun jasa sebagai pelaksanaan atas surat persetujuan penanaman modal yang telah diperoleh perusahaan sebelumnya.

Sementara nilai investasi dalam negeri (PMDN) yang disetujui pada Januari-Februari 2003 turun 10% dibandingkan periode sama 2002, dari Rp. 1,532 triliun (31 proyek) menjadi Rp. 1,385 triliun yang berasal dari 19 proyek. Jumlah proyek yang disetujui itu terdiri atas 15 proyek baru dan 4 proyek yang beralih status. Menurut data BKPM tersebut, terdapat 17 persetujuan perluasan usaha bagi perusahaan PMDN yang telah ada dengan nilai investasi Rp. 758,7 miliar. Jumlah tenaga kerja yang akan terserap direncanakan sebanyak 6.575 orang tenaga kerja Indonesia dan 47 orang tenaga kerja asing. Sementara potensi ekspornya diperkirakan sebesar US\$129,9 juta dengan jumlah proyek sebanyak 9 proyek.<sup>1</sup> Sekilas data-data di atas dapat memberikan optimisme akan adanya indikasi perbaikan daya tarik investasi di Indonesia. Optimisme dari indikasi perbaikan daya tarik Indonesia secara makro, diharapkan juga akan terjadi di tingkat regional.

Dalam pemeringkatan daya tarik investasi 134 kabupaten/kota tahun 2002, ditemukan sejumlah persoalan yang masih mengganjal dalam daya tarik investasi di daerah-daerah kabupaten/kota di Indonesia. Melanjutkan upaya yang telah dibuatnya tahun 2001 dan 2002 KPPOD (Komite Pemantauan Pelaksanaan Otonomi Daerah) kembali melakukan pemeringkatan daya tarik investasi daerah Kabupaten/Kota di Indonesia tahun 2003, yang dimaksudkan untuk menjawab beberapa pertanyaan berikut :

1. Seperti apakah peringkat daya tarik daerah Kabupaten/Kota terhadap investasi dalam persepsi dunia usaha di tahun 2003 ?
2. Apakah ada perubahan peringkat daya tarik investasi kabupaten/kota tahun 2003 dibandingkan dengan tahun sebelumnya dan faktor-faktor apa yang menyebabkan perubahan tersebut ?

than 138.4% higher compared with the first two months of 2002 that recorded only of US\$958.8 million with the number of approved projects totaling 159. While for business expansion there are 42 projects from Foreign Direct Investment Companies (PMA), with an investment value amounting to US\$148.4 million. The number of permanent operating licenses that were granted to PMA in January accounts for 33 projects with actual investment value of US\$63.3 million. Permanent operating licenses are the license that must be obtained by a company to enter into actual commercial production either of goods or service or prior capital investment approval that was granted to companies.

Meanwhile the domestic investment value (PMDN) that was approved for January-February 2003 dropped to 10% compared with the same period in 2002; from Rp 1.532 trillion (31 projects) it becomes Rp. 1.385 trillion originating from 19 projects. These projects consist of 15 new projects and 4 status-shifting projects. According to the data from BKPM, there were 17 business expansion approvals for existing Domestic Direct Investment Companies (PMDN) with investment value of Rp758.7 billion. The number of workers that can be absorbed is 6,575 Indonesian workers and 47 foreign workers. Meanwhile, export potential is estimated at US\$129.9 million from 9 projects.<sup>1</sup> A glance at the data above provides us with optimism that there is an indication of improvements in attracting investment in Indonesia. The optimism from these signs of improvement in the macroclimate for investment in Indonesia can also be expected to have a positive impact at regional level.

In the rating on investment attractiveness of 134 districts/municipalities in the year 2002, it was found that there are still a number of issues in the field to be overcome in attracting investment to district/municipal areas in Indonesia. As a follow-up to the effort made in the year 2001 and 2002, the Regional Autonomy Watch (KPPOD/Komite Pemantauan Pelaksanaan Otonomi Daerah) once again conducted a rating of investment attractiveness of Districts/Municipalities in Indonesia for the year 2003, which is intended to provide answers to several questions as follows:

1. What is the level of attractiveness of Districts/Municipalities for investment as perceived by the business community in the year 2003?
2. Is there any change in the rating on investment attractiveness of Districts/Municipalities for the year 2003 in comparison with previous years and what are the factors that cause such change?

<sup>1</sup> Bisnis Indonesia, 22 Maret 2003

<sup>1</sup> Bisnis Indonesia, 22 March 2003



## B. Tujuan Penelitian

1. Membuat pemeringkatan daya tarik investasi daerah terhadap investasi berdasarkan persepsi dunia usaha.
2. Melihat perubahan peringkat daya tarik investasi daerah kabupaten/kota, dan faktor-faktor yang menyebabkan.

## C. Signifikansi Penelitian

1. Dapat membantu daerah-daerah dalam melihat daya tariknya terhadap investasi ditinjau dari berbagai aspek.
2. Sebagai suatu panduan bagi kalangan dunia usaha atau investor dalam membuat keputusan berinvestasi.

## B. Purpose of Study

1. To make a rating on attractiveness of regions toward investment based on the perception of the business community.
2. To see whether there is a change in investment ranking of Districts/Municipalities, and the factors that cause such change.

## C. Significance of Study

1. This study is intended to help local governments examine how their areas are perceived in terms of investment attractiveness.
2. As a reference for the international business community or local investor in making investment decisions.



## II. KERANGKA PEMIKIRAN

### Analytical Framework

Dalam konteks pembangunan regional, investasi memegang peran penting untuk mendorong pertumbuhan ekonomi. Secara umum investasi atau penanaman modal, baik dalam bentuk penanaman modal dalam negeri (PMDN) maupun penanaman modal asing (PMA) membutuhkan adanya iklim yang sehat dan kemudahan serta kejelasan prosedur penanaman modal. Iklim investasi juga dipengaruhi oleh kondisi makroekonomi suatu negara atau daerah. Kondisi inilah yang mampu menggerakkan sektor swasta untuk ikut serta dalam menggerakkan roda ekonomi. Secara umum investasi akan masuk ke suatu daerah tergantung dari daya tarik daerah tersebut terhadap investasi, dan adanya iklim investasi yang kondusif. Keberhasilan daerah untuk meningkatkan daya tariknya terhadap investasi salah satunya tergantung dari kemampuan daerah dalam merumuskan kebijakan yang berkaitan dengan investasi dan dunia usaha serta peningkatan kualitas pelayanan terhadap masyarakat. Kemampuan daerah untuk menentukan faktor-faktor yang dapat digunakan sebagai ukuran daya saing perekonomian daerah relatif terhadap daerah lainnya juga sangat penting dalam upaya meningkatkan daya tariknya dan memenangkan persaingan. Hal yang juga penting untuk diperhatikan dalam upaya menarik investor, selain makroekonomi yang kondusif juga adanya pengembangan sumber daya manusia dan infrastruktur dalam artian luas. Hal ini menuntut perubahan orientasi dari peran pemerintah, yang semula lebih bersifat sebagai regulator, harus diubah menjadi supervisor, sehingga peran swasta dalam perekonomian dapat berkembang optimal.

Dalam penelitian ini, sejumlah variabel - konsep yang mempunyai variasi nilai / intensitas

In the context of regional development, investment plays an important role for the economic growth. In general, domestic and foreign investment requires favorable business climate and easy and clear investment procedures. By and large, the flow of investment into the region depends on investment attractiveness of that region and favorable investment climate. The success of a region in increasing its attractiveness to investment, for one thing, depends on its ability to formulate policies on investment and business community as well as increasing service quality for the people. The ability of region to determine factors that can be used as measurement of its regional economic competitiveness vis-à-vis other regions is also very important to increase attractiveness and win the competition. One of the very important factors that should be considered in attracting investors, besides favorable macro-economy, is the development of human resource and infrastructure in broad sense. This demands a shift in orientation of government role as regulator into supervisor, to optimally develop the role of private sectors in the economy.

In this research, several variables -concepts that have variability in value/intensity/number

/ jumlah yang menggambarkan atribut dari variabel tersebut; - digunakan untuk menentukan daya tarik investasi suatu daerah. Berdasarkan identifikasi tingkat dan elemen-elemen untuk tujuan pemeringkatan daya tarik daerah Kabupaten/Kota terhadap investasi, serta untuk menjawab pertanyaan-pertanyaan dalam penelitian ini; dari pemahaman studi literatur, opini para pelaku usaha, masukan para ahli dan hasil pemeringkatan yang dilakukan KPPOD sebelumnya; variabel-variabel yang mempengaruhi daya tarik investasi daerah dapat dikelompokkan kedalam 5 (lima) faktor sebagai berikut : I. Kelembagaan, II. Sosial Politik, III. Perekonomian Daerah, IV. Tenaga Kerja dan Produktivitas, V. Infrastruktur Fisik. Untuk pemeringkatan daya tarik investasi 200 kabupaten/kota di Indonesia tahun 2003 ini masih menggunakan variabel-variabel yang digunakan untuk pemeringkatan tahun 2002, seperti terlihat pada Diagram 1. di bawah ini.

attributable to such variables- are used to determine investment attractiveness of any region. Study of related literature, opinion of business actors, input from experts, and results of rating previously done by KPPOD are the guides in identifying the levels and elements of variables, so as to ensure proper application of those variables in answering the research questions and meeting the objectives of rating on investment attractiveness of Regency/City. At the end, the variables that influence regional investment attractiveness applied here can be classified into 5 (five): I. Regulation & Government Services, II. Socio-Political Condition, III. Regional Economic Dynamism, IV. Labor and Productivity, and V. Physical Infrastructure. The elaboration and development of the five groups of variables/factors into indicators for every variable is also done based on study of related literature, and discussion with experts and business community. The elaboration of variables used in this research is explained in

Diagram/Figure 1.  
Hirarki Faktor & Variabel Pemeringkatan/Rating Variable and Factors

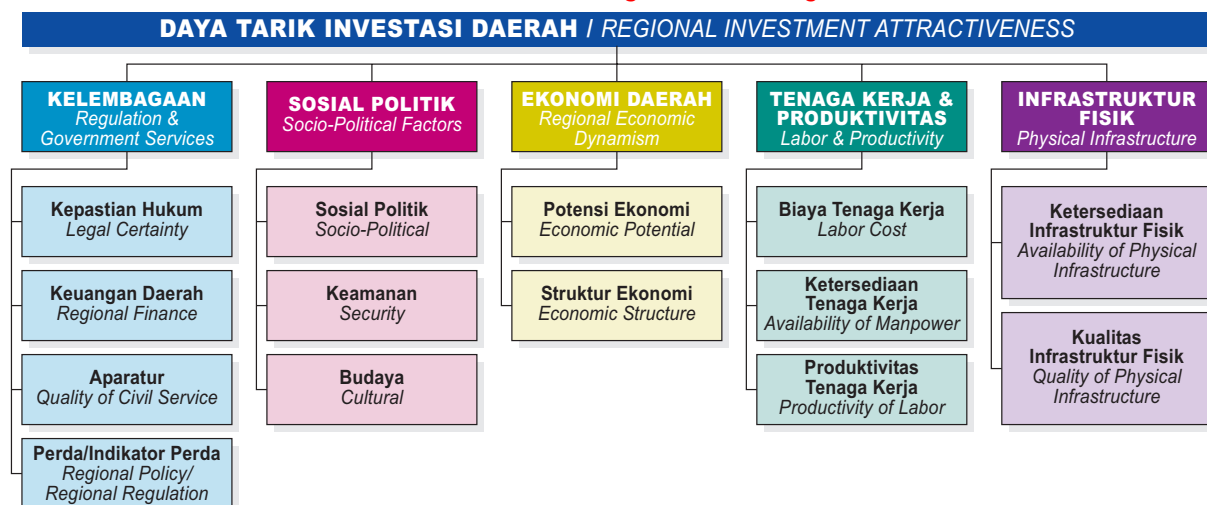

Penjabaran dan pengembangan kelima faktor/kelompok variabel tersebut ke dalam masing-masing indikator dari setiap variabel, dilakukan juga atas dasar studi literatur, diskusi dengan para ahli dan kalangan dunia usaha dapat dijelaskan seperti uraian dibawah ini :

the enclosed hierarchical diagram, but the following explanation can provide their more operational definitions. (Appendix 1.)

#### A. Faktor Kelembagaan

Kelembagaan, mencakup kapasitas pemerintah dalam menjalankan fungsi-fungsi pemerintahan dalam hal perumusan kebijakan, pelayanan publik, kepastian dan penegakan hukum, serta pembangunan daerah. Dalam

#### A. Regulation and Government Service

Regulation and Government factor includes government capacity in performing governmental functions in terms of providing legal certainty and law enforcement, public service, policy formulation, and local development. In this

penelitian ini, faktor kelembagaan terbagi dalam 4 (empat) variabel, yaitu :

#### A1. Variabel Kepastian Hukum

Yang dimaksud dengan kepastian hukum disini adalah adanya konsistensi peraturan dan penegakan hukum di daerah. Konsistensi peraturan ditunjukkan dengan adanya peraturan yang dapat dijadikan pedoman untuk suatu jangka waktu yang cukup, sehingga tidak terkesan setiap pergantian pejabat selalu diikuti pergantian peraturan yang bisa saling bertentangan. Sedangkan penegakan hukum dilihat dari kinerja aparat penegak hukum dalam melakukan penegakan peraturan dan keputusan sesuai dengan peraturan tanpa membedakan subyek hukum. Termasuk dalam variabel kepastian hukum adalah keberadaan pungutan liar diluar birokrasi yang dapat terjadi baik di jalur distribusi maupun tempat produksi. Indikator lain dalam variabel ini adalah hubungan antara eksekutif dan legislatif. Bilamana hubungan kedua unsur pemerintahan itu terjalin baik maka akan kondusif bagi kepastian hukum dalam pengertian luas (dalam praktik dunia usaha, aturan formal bisa terabaikan ketika terjadi perselisihan antar kedua unsur pemerintahan tersebut yang berimbas ke dunia usaha).

#### A.2. Variabel Aparatur dan Pelayanan

Yang dimaksud dengan aparatur di sini adalah orang/pejabat atau pegawai pemerintah daerah yang melaksanakan fungsi administrasi pemerintah daerah, yaitu menyediakan pelayanan publik, infrastruktur fisik, serta merumuskan peraturan berupa aturan main dari aktivitas dunia usaha dan investasi. Indikator aparatur pemda dalam pemeringkatan ini adalah penggunaan wewenang aparat pemda dalam menjalankan peraturan. Sedangkan dari sisi pelayanan yang diberikan aparatur pemda dilihat kejelasan rantai birokrasi dalam hal pengurusan perizinan dan hal-hal lain terkait dengan dunia usaha serta perilaku aparat pemda dalam melakukan pelayanan.

#### A.3. Variabel Kebijakan Daerah / Peraturan Daerah

Pada prinsipnya peraturan/kebijakan daerah adalah kerangka acuan / aturan main secara formal yang dibuat dan ditetapkan oleh pemerintah daerah dalam mengatur aktivitas dunia usaha dan investasi. Kebijakan Daerah dapat berupa Peraturan Daerah (Perda) dan Keputusan Kepala Daerah (SK Bupati/Walikota) yang mengatur tentang Pajak dan Retribusi Daerah, prosedur pelayanan kepada masyarakat,

research, institutional factor is divided into 4 (four) variables, namely:

#### A.1. Variable of Legal Certainty

Legal certainty here refers to the consistency of rules and law enforcement in the region. This means that there are rules that can be used as guidance for enough length of time, which is not subject to frequent change due to succession of official. Whereas law enforcement is viewed from the capacity of law enforcers to enforce rules and court verdicts without discriminating law subjects. Included in the variable of legal certainty observed here is the presence of illegal levy that operate both in distribution and production places. Another indicator under this variable is the relationship between executive and legislative governmental bodies. If the relation of said governmental branches is good, legal certainty would be more apparent in broad sense (in business practice, formal rules are easily ignored if there is conflict between governmental branches which interfere business).

#### A.2. Variable of Apparatus and Service

Apparatus here refers to the person/official or regional government employee responsible in the administration of regional government in providing public service, physical infrastructure, and formulating regulations on business activities and investment. The indicators under regional government apparatus measured in this rating include the use of authority of regional government apparatus to enforce rules, regardless of the existence of abuse of authority or its absence; and in terms of provision of service by regional government apparatus, the clarity of bureaucracy chain in permit handling and other things related with business community and the behavior of regional government apparatus in providing such service.

#### A.3. Variable of Local Regulation

Basically, local regulation/policy refers to all formal policies or implementing rules that are stipulated and established by local government in regulating the activity of business community and investment. This Local Policy can be in the form of Local Regulation (Perda) and Decision of the Regent/Mayor (SK Bupati/Walikota) that regulate Local Tax and Retribution/User-charges, public service procedures, etc. Local Regulations



perizinan, dan lain-lain. Perda yang mengatur mengenai prosedur pelayanan terhadap dunia usaha/investasi yang menarik para investor antara lain yang memberikan kemudahan dalam birokrasi pelayanan usaha, konsistensi kebijakan, harmonisasi antar produk hukum, tidak adanya hambatan-hambatan birokrasi dan sebagainya.

Peraturan yang memuat pungutan yang baik semestinya tidak hanya sekedar ditujukan untuk peningkatan PAD tanpa mempertimbangkan prinsip-prinsip ekonomi, filosofi pungutan dan dampak terhadap perekonomian berkelanjutan. Pelanggaran atas prinsip-prinsip tersebut merupakan distorsi bagi kegiatan usaha dan investasi. Distorsi dari pungutan tersebut bisa terjadi pada harga komoditas, hambatan lalu lintas perdagangan antar daerah, biaya produksi, ekonomi biaya tinggi akibat pungutan berganda atau yang melampaui kewajiban, dan sebagainya.

#### A.4. Variabel Keuangan Daerah

Yang dimaksud Keuangan Daerah dalam penelitian ini adalah kebijakan, strategi, dan teknik yang diterapkan oleh pemerintah daerah dalam upaya untuk memperoleh dana, serta pembelanjaan atau pengalokasian dana-dana tersebut untuk membiayai kegiatan-kegiatan yang berkaitan dengan fungsi atau tugas pemerintahan yang diemban oleh pemda (pelayanan, pembangunan, dan lain-lain). Kebijakan pemerintah daerah dalam menggali dana dan mengelola dana yang telah mereka peroleh untuk peningkatan perekonomian daerahnya tersebut tertuang dalam APBD.

Variabel keuangan daerah ini dikelompokkan menjadi dua, yaitu struktur pungutan, dan komitmen pemda dalam pembangunan. Struktur pungutan digunakan untuk melihat upaya pemerintah daerah dalam memperoleh dana yang berasal dari pungutan yang dilakukan kepada masyarakat, seperti melalui pajak dan retribusi daerah serta pungutan lainnya. Dalam penelitian ini dilihat rasio antara retribusi terhadap pajak daerah, dengan asumsi bahwa rasio retribusi yang lebih kecil dari pajak akan mendukung dunia usaha, karena pada umumnya struktur pungutan dalam pajak relatif lebih jelas dibanding pungutan dalam retribusi. Sementara struktur pembelanjaan APBD digunakan untuk melihat komitmen pemerintah daerah dalam melakukan pelayanan publik. Rasio anggaran pembangunan terhadap pengeluaran daerah untuk membiayai kegiatan-kegiatan pembangunan yang merupakan indikasi komitmen pemerintah daerah

regulating service procedure for business community/investment that attract investors are usually those which provide ease in business service procedure, consistency of local government policy, harmony among legal products, absence of bureaucratic barriers, etc.

In terms of tariff, focus was directed to various mandatory levies applied to public and business communities regulated in local regulation regarding tax and retribution intended only for increasing PAD without considering the principles of economy, philosophy in application of levies, and its impact in terms of economic sustainability, which are distorting business and investment activities. The levies may be distorting the price of commodity, hampering inter-regional trade traffic, local regulation regulating manpower, and producing high cost economy due to double or multiple levies applied based on very weak justification. Guidance for study of Local Regulation is reflected in **Appendix 5.1**.

#### A.4. Variable of Local Finance

Local Finance encompasses all policies, strategies, and techniques applied by local government to generate fund, and in allocating the fund to finance its function or duty as local government (service delivery, development initiatives, etc.). The policy of local government in generating and managing fund to boost local economy is stipulated in APBD (Local Budget). This variable of local finance is grouped into two, namely levy structure, and the commitment of local government for development.

Levy structure is used to see the efforts of the local government in generating fund from the public through tax and local retribution and other charges. In this research, the ratio between local retribution and local tax is considered, with the assumption that a lower ratio of retribution than that of tax supports business community, because the levy structure in tax is by and large relatively clearer than levy from retribution. While the structure of Local Budget is used to observe the commitment of local government in public service delivery. The ratio between development budget and local operational budget to fund development activities is considered. This is an indication of local government's commitment in developing physical infrastructure needed to support business activity, and to promote local economy.

dalam melakukan pembangunan infrastruktur fisik yang diperlukan untuk mendukung kegiatan usaha, dan mendorong perekonomian daerah.

## B. Faktor Sosial Politik

Yang dimaksud dengan kondisi sosial politik daerah adalah berbagai dampak atau akibat dari hubungan timbal balik antara segi kehidupan ekonomi dengan segi kehidupan politik, antara segi hukum dan segi kehidupan agama, segi kehidupan politik dan keamanan dan sebagainya. Kelompok variabel ini digunakan untuk mengukur seberapa kondusif aspek sosial, politik, keamanan, dan budaya dalam mendukung perekonomian daerah dan daya tarik investasi daerah.

### B.1. Variabel Keamanan

Adalah situasi keamanan di daerah yang mempengaruhi kegiatan usaha/investasi, yang dapat mendukung atau menghambat aktivitas usaha/investasi dan jaminan keselamatan jiwa maupun harta. Kondisi keamanan dapat diukur dari rasa aman dan tingkat gangguan keamanan terhadap dunia usaha maupun terhadap lingkungan masyarakat tempat usaha, serta kecepatan aparat dalam menanggulangi gangguan keamanan.

### B.2. Variabel Sosial Politik

Kondisi sosial politik adalah keadaan di daerah yang merupakan hasil relasi antar pranata-pranata dalam satu sistem sosial di daerah, baik antar pranata politik dan pemerintahan, antar pranata sosial di masyarakat, maupun antar pranata formal dalam pemerintahan maupun antara elemen-elemen masyarakat. Beberapa aspek yang membentuk kondisi sosial politik daerah diantaranya adalah: keterbukaan birokrasi terhadap partisipasi dunia usaha dalam perumusan kebijakan yang menyangkut kepentingannya, konflik sosial antar kelompok masyarakat, stabilitas politik, dan kegiatan unjuk rasa.

### B.3. Variabel Budaya Masyarakat

Budaya merupakan seperangkat ide atau gagasan yang dimiliki oleh sekelompok orang dalam wilayah tertentu, yang mendasari atau mengilhami perilaku atau tindakan orang, baik secara individu maupun kolektif dari anggota kelompok tersebut. Yang diperlukan oleh investor yang akan masuk ke suatu daerah adalah nilai-nilai budaya masyarakat yang terbuka terhadap

## B. Socio-Political Factor

Local socio-political condition refers to various impacts or results of reciprocal relationship between economy and politics, between law and religion, between politics and security, and so forth. This variable group is used to measure how conducive is the aspects of social, politics, security, and culture in supporting local economy and local investment attractiveness.

### B.1. Variable of Security

Local security situation influences business/investment activity, either as support or impediment for the business/investment activity and security of life and property. Security condition can be measured from the sense of security and level of security disturbance toward business community and social environment where the business is, as well as the pace of apparatus in dealing with security disturbance.

### B.2. Variable of Socio-Political Condition

Socio-political condition relates to the situation in the region as a result of relationship among institutions in one social system in a region, either among formal institutions in the government, among social institutions, or between formal institutions and social institutions. Several aspects that form local socio-political condition are among others: openness of bureaucracy for the participation of business community in formulating policy concerning their interest, social conflicts, political stability, and demonstration activity.

### B.3. Variable of Society's Culture

Culture is defined as a set of ideas possessed by a group of people in a certain area, on which behavior or attitude of the group, individually or collectively, is based. To determine regional investment attractiveness for investors, society's value that can support the influx of investment to a region is divided at least into 4 (four) aspects, namely community's openness/receptiveness toward business community,

masuknya dunia usaha, adanya kondisi dimana masyarakat tidak antipati terhadap suatu investasi usaha. Selain keterbukaan, perilaku nondiskriminatif dari masyarakat setempat dengan perlakuan yang sama kepada semua orang tanpa membedakan asal usul, ras, agama, gender dalam kegiatan di setiap sektor. Etos kerja masyarakat, dalam pengertian kemauan kerja keras, persaingan untuk berprestasi, jujur dan mau/mudah untuk dibina; juga menjadi pertimbangan investor untuk membuka usaha di suatu daerah. Bila masyarakat setempat mempunyai etos kerja yang baik maka akan memudahkan investor dalam rekrutmen pekerja tanpa harus mendatangkan tenaga kerja dari luar daerah tersebut. Hal lain yang juga dipertimbangkan oleh investor adalah adat istiadat, khususnya adat istiadat masyarakat setempat yang tidak mengganggu produktivitas usaha.

### C. Faktor Ekonomi Daerah

Merupakan ukuran kinerja sistem ekonomi daerah secara makro. Perekonomian daerah mencakup beberapa hal, antara lain variabel utama makro ekonomi (seperti total output / PDRB, tingkat harga, dan kesempatan kerja) yang membentuk struktur ekonomi daerah. Perekonomian daerah digunakan untuk mengukur daya dukung potensi ekonomi, (ketersediaan sumber daya alam, dan lain-lain), serta struktur ekonomi terhadap kegiatan usaha / investasi.

#### C.1. Variabel Potensi Ekonomi

Potensi ekonomi daerah : mencakup potensi fisik dan non fisik suatu daerah/wilayah seperti penduduk/manusia, sumber daya alam, sumber daya buatan dan sumber daya sosial. Faktor penduduk yang dianalisis dalam kaitannya dengan daya tarik investasi daerah pertama adalah kemampuan masyarakat untuk memenuhi kebutuhan hidupnya, yang dilihat dari PDRB perkapita. PDRB perkapita merupakan nilai PDRB atas dasar harga berlaku dibagi jumlah penduduk di suatu daerah. Kedua, potensi ekonomi dilihat dari laju pertumbuhan ekonomi, yaitu rata-rata pertumbuhan nilai PDRB atas dasar harga konstan dari suatu periode/tahun terhadap periode/tahun sebelumnya. Indikator Indeks Pembangunan Manusia (IPM) digunakan sebagai identifikasi potensi ekonomi yang menggambarkan kemampuan masyarakat setempat dalam cakupan yang luas.

non-discriminative community, community's working ethos, and community's custom. Investors who are planning to come into a region need a culture that is open to the incoming business community, a condition in which the society is not antipathy toward any business investment. Beside openness, investors need non-discriminating attitude of the local community with the same treatment toward all people without discriminating the origin, race, religion, and gender in every business sector. In opening a business in a certain area, investors also consider the community's working ethos – reflected in their willingness to work hard – competition for achievement, honesty and willingness/flexibility to develop. If the surrounding community has good working ethos, investors will find it easy to recruit employees without importing workers from outside the area. Another thing considered by investors is custom, especially local community's custom that does not disturb business productivity.

### C. Factor of Regional Economic Dynamism

Regional Economic Dynamism measures the performance of macro local economic system. Regional Economic Dynamism includes several aspects, such as macro economic main variables (like total output/PDRB, price level, and job opportunity) that form local economic structure. Local economy is used to measure the capacity of the local economy (natural resources, etc), and economic structure toward business/ investment activities.

#### C.1. Variable of Economic Potential

Local economic potential includes the potential of physical and non-physical resources of any area like population/human resources, natural resources, man-made resources, and social resources. The population factor analyzed in relation to regional investment attractiveness is the society's capability to meet their need, which can be seen from Gross Regional Domestic Product (GRDP) per capita. GRDP per capita is the value of GRDP based on prevailing market price divided by the population of the region. Moreover, economic potential can also be seen from economic growth, that is the average of PDRB growth value based on constant price of a certain period/year against the previous period/year. Human Development Index (HDI) indicator is also used as one of the indications of economic potential that describes the local community's ability in a broad scope.

## C.2. Variabel Struktur Ekonomi

Nilai tambah bruto seluruh sektor kegiatan ekonomi yang terjadi di suatu daerah, digunakan untuk melihat struktur ekonomi daerah yang bersangkutan. Basis struktur perekonomian terlihat dari kontribusi sektor-sektor ekonomi tertentu terhadap nilai bruto seluruh sektor yang ada di daerah tersebut (nilai tambah sektoral). Berdasarkan kontribusi sektoral tersebut dapat dilihat apakah struktur ekonomi daerah yang bersangkutan berbasis sumber daya alam (primer), sudah terbiasa dalam kegiatan ekonomi produktif dan industrialisasi (sekunder), dan pada perdagangan, jasa, dan perbankan (tersier). Indikator-indikator struktur ekonomi tersebut penting bagi investor untuk mengetahui kegiatan ekonomi yang telah berkembang di daerah yang bersangkutan.

## C.2. Variable of Economic Structure

The amount of gross value-added of all economic activities that transpired in a certain area is used to analyze the economic structure of a region, all of which are measured in GRDP. Economic structure is seen from the contribution of certain economic sectors to the gross value of all sectors in the area (value-added by sector). Based on this contribution by sector we can see whether the relevant local economic structure is based on natural resources (primary), accustomed to productive economic activities and industrialization (secondary), and on service and banking (tertiary). The mentioned economic structure indicators are important for investors to identify the economic activity that has developed in the relevant region.

## D. Faktor Tenaga Kerja dan Produktivitas

Tenaga kerja merupakan faktor produksi yang sangat penting dalam pembentukan nilai tambah suatu kegiatan ekonomi. Selain itu pekerja yang merupakan sumber daya manusia adalah komponen utama dari pembangunan karena pelaku utama pembangunan adalah manusia. Untuk melihat gambaran tentang berapa besar nilai tambah suatu kegiatan ekonomi yang diberikan oleh setiap pekerja pada suatu kegiatan ekonomi dapat dilihat dengan menghitung produktivitas tenaga kerja. Beberapa hal yang berhubungan dengan ketenagakerjaan yang dapat mempengaruhi daya tarik terhadap investasi adalah :

## D. Factor of Labor and Productivity

Manpower constitutes a very important production factor in the formation of value-added of an economic activity. Furthermore, human resource in the form of labor is the main component of development because the main agent of development is human being. The value-added of an economic activity (as provided by every worker in any economic activity) can be measured by counting labor productivity. Several things that have relationship with manpower, and which can influence investment attractiveness, are as follows:

### D.1. Variabel Ketersediaan Tenaga Kerja

Untuk kegiatan investasi/usaha diperlukan adanya tenaga kerja yang cukup tersedia, baik yang belum berpengalaman maupun yang sudah berpengalaman. Tenaga kerja tersebut dapat diperoleh dari daerah yang bersangkutan atau dengan mendatangkan dari daerah lain. Ketersediaan tenaga kerja yang dibutuhkan oleh sebuah kegiatan usaha dilihat dari rasio jumlah penduduk usia produktif; rasio pencari kerja terhadap angkatan kerja; maupun tenaga kerja dengan basis pendidikan minimal SLTP yang sudah memiliki pengalaman kerja.

### D.1. Variable of Manpower Availability

Investment/business activity needs the availability of manpower, whether experienced or not. The labor can be obtained from the relevant region or by importing from other regions. The availability of manpower needed in a business activity can be measured by calculating the ratio of the productive age population, ratio of people looking for a job and work force, and labor of at least junior high school with work experience.

### D.2. Variabel Biaya Tenaga Kerja

Yaitu tingkat kompensasi untuk pekerja secara keseluruhan sebagai biaya yang dikeluarkan oleh pengusaha, yang biasanya merupakan upah atau gaji untuk pekerjanya. Pedoman normatif

### D.2. Variable of Labor Cost

Labor cost refers to the compensation for the entire workers as the cost expended by businessman, in the form of wage or salary. Normative guidance on wages established by the

pengupahan yang ditetapkan pemerintah UMP/UMK menjadi faktor penting bagi pengusaha dalam mengkalkulasi bisnisnya. Selain panduan normatif yang ada, investor juga membutuhkan 'pasar' upah yang berlaku di daerah yang bersangkutan berupa upah yang sebenarnya diterima oleh para pekerja yang mungkin bisa lebih tinggi atau lebih rendah dari UMP/UMK; asumsinya semakin kecil upah menjadi semakin menarik bagi investor.

#### D.3. Variabel Produktivitas Tenaga Kerja

Produktivitas tenaga kerja merupakan salah satu indikator ketenagakerjaan yang dikaitkan dengan faktor ekonomi. Secara makro hanya dapat diperoleh produktivitas rata-rata pada sektor-sektor ekonomi agregatif, bukan besarnya produksi barang dan jasa tetapi besarnya pertumbuhan ekonomi (PDRB). Produktivitas diukur berdasarkan besarnya PDRB di sektor tertentu dibagi dengan jumlah pekerja di sektor tersebut. Metode ini banyak kelemahan dan kurang akurat, namun demikian cara pengukuran seperti ini masih memadai untuk menunjukkan kecenderungan produktivitas kesempatan kerja.

#### E. Faktor Infrastruktur Fisik

Yang dimaksud dengan infrastruktur fisik adalah berbagai instalasi dan kemudahan dasar (terutama sistem transportasi, komunikasi, dan listrik), yang diperlukan oleh masyarakat dalam melakukan aktivitas perdagangan dan kelancaran pergerakan orang, barang, dan jasa dari satu daerah ke daerah lain atau ke negara lain dalam suatu kegiatan usaha. Faktor infrastruktur fisik untuk penelitian ini dibagi menjadi dua variabel yaitu :

##### E.1. Variabel Ketersediaan Infrastruktur Fisik

Untuk kelancaran kegiatan usaha perlu didukung oleh ketersediaan infrastruktur fisik seperti jalan raya, kereta api, pelabuhan laut dan udara, sarana komunikasi (telpon), dan sumber energi (listrik).

##### E.2. Kualitas dan Akses terhadap Infrastruktur Fisik

Infrastruktur fisik yang tersedia belum tentu menjamin kelancaran kegiatan usaha. Untuk itu infrastruktur yang tersedia juga harus berada dalam kondisi baik. Kualitas infrastuktur selain memperlihatkan kondisi fisiknya yang siap dan layak untuk digunakan, juga ditunjukkan dengan

government in the form of Provincial Minimum Wage (UMP) or City Minimum Wage (UMK) becomes an important factor for businessman in calculating his business. In addition to the existing normative guidance, investor also needs wage 'market' effective in the relevant region or the wage actually accepted by workers that may be higher or lower than UMP/UMK. The assumption is that the lower the wage the more interesting the business is to the investors.

#### D.3. Variable of Labor Productivity

Essentially labor productivity is one of the indicators of labor that is closely related to economic factor. In macro level, we can only obtain average productivity on the aggregate economic sectors, that is the amount of economic growth (PDRB) and not the amount of goods and services produced. Productivity is measured based on the amount of PDRB in certain sector divided by the number of workers in such sector. This method has many disadvantages and is less accurate, but this way of measurement is still sufficient to compare tendency in productivity increase and job opportunity.

#### E. Factor of Physical Infrastructure

Physical infrastructure encompasses various installations and basic facilities (especially transportation system, communication, and electricity), which are very much needed by the society in trading activity and to ease the mobilization of people, goods and service from one region to other regions or states. Physical infrastructure factor for this research is divided into two variables:

##### E.1. Variable of Physical Infrastructure Availability

A smooth business activity requires support of the availability of facility or physical infrastructures like road, railway, harbor and airport, communication facility (telephone), energy source or electricity.

##### E.2. Quality and Access to Physical Infrastructure

Besides the availability of physical infrastructure, a smooth production factors' movement in business activity should also be supported by good quality infrastructure. Infrastructure quality can, apart from its physical condition ready to use, also be measured by assessing



kemudahan akses terhadap infrastruktur yang ada.

Berdasarkan studi literatur dan pendapat para ahli (ekonom dan pelaku usaha), variabel-variabel sebagaimana dijabarkan di atas merupakan variabel-variabel yang membentuk daya tarik investasi daerah. (*Lihat Lampiran 4.1. Daftar Faktor, Variabel dan Indikator Pemeringkatan*)

Bobot pengaruh masing-masing faktor, variabel, dan indikator terhadap daya tarik investasi suatu daerah bervariasi / berbeda. Dengan menggunakan metode *The Analytic Hierarchy Process* (AHP) terlebih dahulu akan dilakukan pembobotan terhadap masing-masing variabel-variabel serta indikator-indikator sebagaimana dijelaskan di atas untuk menentukan bobot pengaruh tiap variabel dan indikator tersebut dalam membentuk daya tarik investasi daerah.

the accessibility toward the relevant infrastructure.

Variables elaborated above are those that form regional investment attractiveness (**Appendix 4. Factors, variables, and indicators of the research**). Employing the method of The Analytic Hierarchy Process (AHP), each variable as well as indicator as explained above is measured to obtain its magnitude in the framework of determining the influence of each variable and indicator on regional investment attractiveness.



# III. METODOLOGI

## Research Methodology

### A. Ruang Lingkup Penelitian

Pemeringkatan daya tarik investasi Kabupaten/Kota di Indonesia dilakukan terhadap 200 daerah (156 Kabupaten dan 44 Kota) di 29 Propinsi dari 416 daerah (328 Kabupaten dan 88 Kota) di seluruh Indonesia. Penelitian ini difokuskan pada daerah-daerah Kabupaten dan Kota, dengan pertimbangan bahwa otonomi daerah menempatkan daerah Kabupaten/Kota sebagai ujung tombak dalam pelayanan kepada masyarakat dan pembangunan. Selain itu dalam kerangka AFTA, adanya pembebasan atau pengurangan tarif perdagangan barang dan jasa antar negara, menempatkan daerah Kabupaten/Kota pada posisi strategis dalam persaingan antar negara karena persaingan menjadi bergeser pada level daerah Kabupaten/Kota.

Penentuan atau pemilihan daerah-daerah yang diteliti didasarkan pada tahapan sebagai berikut :

1. Dipilih daerah-daerah yang kontribusi salah satu atau lebih PDRB sektoral terhadap total PDRB minimal sebesar 20%. Sektor-sektor tersebut adalah :
  - (1). Kontribusi Pertanian Pangan.
  - (2). Pertanian Non Pangan (Perkebunan, Perikanan, dan Kehutanan),
  - (3). Industri Pengolahan (Manufaktur),
  - (4). Pertambangan, dan
  - (5). Sektor Perdagangan (Perdagangan Besar, Eceran, Hotel dan Restoran).Pertimbangan memilih sektor-sektor tersebut sebagai dasar penarikan sampel karena sektor-sektor tersebut merupakan sektor-sektor utama dalam mendukung perekonomian daerah-

### A. Research Scope

The rating on investment attractiveness of District/Municipality in Indonesia covers 200 regions (156 districts and 44 municipalities) in 28 provinces from 416 regions (328 districts and 88 municipalities) all over Indonesia. The research focuses on the districts and municipalities, since regional autonomy emphasizes districts and municipalities as front liners in service delivery to the people and in the process of development. Apart from that, in the AFTA framework on tariff exemption and reduction of international goods and service trade barriers, districts and municipalities are placed in strategic position in the competition among nations, in the sense that competition is expected to happen more at the district and municipality level.

The regions were chosen for this rating following these considerations and phases:

1. Regions were selected on the basis that one or more of the following sectors recorded at least 20% of the total GRDP:
  - (1) Food Agricultural Sector
  - (2) Non-food Agricultural Sector (Plantation, Fishery and Forestry),
  - (3) Manufacture,
  - (4) Mining, and
  - (5) Trading Sector (Groceries, Retailing, Hotel and Restaurant).

Those sectors are chosen as sample to observe their economic capacity and as investment target. Each sector must have a contribution of at least 20%, because it is assumed that the

daerah di Indonesia, sehingga dapat digunakan untuk melihat daya dukung perekonomian daerah. Selain itu sektor-sektor tersebut juga merupakan sasaran investasi. Sedangkan pertimbangan besarnya kontribusi PDRB masing-masing sektor minimal sebesar 20%, diasumsikan bahwa dengan kontribusi sebesar 20% memperlihatkan bahwa di daerah yang bersangkutan telah terjadi aktivitas ekonomi produktif (terutama pada sektor-sektor yang bersangkutan) yang dapat menunjang kegiatan investasi. Dengan pembatasan seperti ini dari 416 daerah (Kabupaten/Kota yang tercatat pada tahun 2003) diperoleh 259 daerah Kabupaten/Kota.

contribution of at least 20% indicates the presence of productive economic activities in particular area (especially for the related sectors), which can support investment activities. There are 259 selected areas arranged through this selection method.

2. Dari 259 daerah yang terpilih pada tahap pertama, selanjutnya dilihat ketersediaan data pendukung untuk analisis (variabel dan indikator) daya tarik daerah terhadap investasi dalam penelitian ini; seperti data PDRB, APBD, Ketenagakerjaan, Peraturan Daerah dan sebagainya. Terdapat 200 daerah (156 Kabupaten dan 44 Kota) yang berasal dari 28 Propinsi yang mempunyai kelengkapan data pendukung (variabel/indikator) untuk dapat dianalisis, dan yang akhirnya dijadikan obyek penelitian untuk pemeringkatan. Daftar Kabupaten dan Kota yang diperingkat pada tahun 2003, dapat dilihat pada *Lampiran 2. Daerah Penelitian*.

2. The selected 259 regions were then further analyzed using supporting data available for the regional investment attractiveness analysis (variables and indicators) in this research; like GRDP, APBD (Local Budget), manpower, Local Regulation and the like. There are 200 regions (156 regencies and 44 municipalities) in 28 provinces with complete supporting data (variables/ indicators) for analysis, and finally decided as research objects for this rating (**Appendix 2**).

## B. Data Penelitian

### B.1. Jenis Data

Data-data yang digunakan untuk penelitian ini merupakan gabungan antara data primer kuantitatif dan kualitatif yang diperoleh dengan melakukan survei lapangan, serta data sekunder berupa *existing statistic data*.

#### B.1.1. Data Primer,

- Data bobot faktor, variabel, dan indikator yang mempengaruhi daya tarik terhadap investasi, berdasarkan persepsi dunia usaha.
- Data persepsi dunia usaha berkaitan dengan daya tarik investasi suatu daerah, yang diperoleh melalui survei lapangan (*face to face interview*) maupun *mailing*.

#### B.1.2. Data Sekunder

Berupa data-data statistik daerah (*existing statistic data*) yang dikumpulkan pada penelitian

## B. Research Data

### B.1. Types of Data

Data used in this research are a combination of qualitative and quantitative primary data obtained from survey and field research, and secondary data in the form of existing statistical data.

#### B.1.1. Primary Data

- Data on the magnitude of factors, variables and indicators determining investment attractiveness based on business communities' perception.
- Data on business community's perception related to investment attractiveness of a region that was collected by face-to-face interview and mailing questionnaire.

#### B.1.2. Secondary Data

in the form of existing statistical data collected from our previous research and reports

terdahulu maupun laporan yang diberikan oleh pemerintah, diantaranya adalah Perda, Statistik Ekonomi, Ketenagakerjaan, Infrastruktur, Demografi dan sebagainya. Daftar data secara lengkap bisa dilihat pada *Lampiran 3. Data Penelitian*.

provided by the government, including, among others, local regulation, Economic Data, Manpower, Infrastructure Demography etc. (See **Appendix 3. List of Data and Types of Data**)

## B.2. Pengumpulan Data

## B.2. Data Collection

### B.2.1. Teknik Pengumpulan Data

- (1) Pengumpulan data yang berupa *existing statistic* (data sekunder). Dilakukan dengan mengumpulkan data-data statistik daerah yang berasal dari berbagai laporan yang diberikan oleh lembaga pemerintah (seperti BPS, BI, Depdagri, Pemda, dll), serta berbagai laporan penelitian sebelumnya.
- (2) Data Bobot Faktor, Variabel, dan Indikator. Agar dapat dilakukan perbandingan dan perkembangan hasil pemeringkatan dari tahun ke tahun, untuk pemeringkatan tahun 2003 ini masih menggunakan hasil pembobotan tahun 2002. Data pembobotan masing-masing faktor, variabel dan indikator dilakukan melalui wawancara (*face to face interview*) dengan bantuan kuesioner *The Analytic Hierarchy Proccess* (AHP) kepada 2 sampai dengan 3 orang responden pengusaha daerah di setiap daerah penelitian dari 20 daerah penelitian, dan 8 orang pengusaha nasional, serta 3 orang pengamat ekonomi dari Jakarta. Hasil Pembobotan Faktor, Variabel dan Indikator, secara lengkap dapat dilihat pada *Lampiran 4.4. Hirarkhi dan Bobot Faktor, Variabel, Indikator, Intensitas Pemeringkatan*.
- (3) Pengumpulan data persepsi dunia usaha tentang daya tarik investasi daerah dilakukan dengan survei *face to face interviews* dan sebagian dengan *mailling questionnaires* maupun, dengan menggunakan kuesioner yang sama. Jumlah daerah yang dilakukan survei secara *face to face interview* sebanyak 190 daerah, dengan melibatkan kurang lebih 200 interviewer dari daerah-daerah yang bersangkutan. *Sebanyak 10 daerah survei dilakukan secara mailing questionnaire karena tidak ada jaringan KPPD di sana*. Untuk *mailing questioner* dikirim ke 80 responden di setiap daerah penelitian, sementara untuk *face to face interviews* dilakukan ke minimal 20 responden dan maksimal 40 responden. Responden penelitian ini adalah kalangan dunia usaha baik pemilik usaha
- (1) Data on existing statistical data (secondary data) were taken from local statistical reports from different government institutions such as Central Bureau of Statistics (BPS), Indonesia Central Bank, Ministry of Home Affairs, Local Governments etc.), and from other previous research reports.
- (2) In order to be able to compare with the rating result in 2002, this 2003 rating uses the same weight of the factors, variables and indicators of the 2002 rating. Data on the weight of each factor, variable and indicator are collected through interview (face-to-face interview) with the help of The Analytic Hierarchy Process (AHP) with 2 to 3 local business respondents in each research area for 20 research areas, and 7 national businessmen along with 3 economists from Jakarta.
- (3) The data on the perception of business community regarding regional investment attractiveness were collected through survey using questionnaire (structured question list), collected through face-to-face interview and mailing questionnaire. Of 200 areas, face-to-face interview was conducted in 190 areas, while mailing questionnaire was done in 10 areas. For the mailing questionnaire, it was distributed through mail to 80 respondents in the research areas; while the face-to-face interview was done by interviewing of at least 20 respondents to maximum 40 respondents in research areas. The respondents (business owner and managerial level) being interviewed are 5,140 businessmen from 200 Districts/ Municipalities; in average 26 respondents per area.



maupun pengelola usaha (level manager). Jumlah seluruh responden yang berhasil diwawancara untuk pemeringkatan tahun 2003 adalah sebanyak 5.140 orang yang tersebar di 200 daerah Kabupaten dan Kota di Indonesia, atau rata-rata 26 responden di setiap daerah.

- |                                                                                                                                                                                                                                                                                                                                                                                                                                                                                                                                                                                                                                                                                                                                                                                                                                                                                                                                                                                                                                                                                                                                                                                                                                             |                                                                                                                                                                                                                                                                                                                                                                                                                                                                                                                                                                                                                                                                                                                                                                                                                                                                                                                                                                                                                                                                                                                  |
|---------------------------------------------------------------------------------------------------------------------------------------------------------------------------------------------------------------------------------------------------------------------------------------------------------------------------------------------------------------------------------------------------------------------------------------------------------------------------------------------------------------------------------------------------------------------------------------------------------------------------------------------------------------------------------------------------------------------------------------------------------------------------------------------------------------------------------------------------------------------------------------------------------------------------------------------------------------------------------------------------------------------------------------------------------------------------------------------------------------------------------------------------------------------------------------------------------------------------------------------|------------------------------------------------------------------------------------------------------------------------------------------------------------------------------------------------------------------------------------------------------------------------------------------------------------------------------------------------------------------------------------------------------------------------------------------------------------------------------------------------------------------------------------------------------------------------------------------------------------------------------------------------------------------------------------------------------------------------------------------------------------------------------------------------------------------------------------------------------------------------------------------------------------------------------------------------------------------------------------------------------------------------------------------------------------------------------------------------------------------|
| <p>(4) Kuesioner yang digunakan untuk survei dirumuskan secara terstruktur, sistematis serta pemilihan responden yang representatif memungkinkan data yang diisi dalam kuesioner merupakan suatu data yang telah mempunyai nilai obyektivitas yang tinggi sesuai dengan pengetahuan/pengertian/kepercayaan individu tentang obyek sikap (<i>kognitif</i>) karena pengalaman, lamanya seseorang mengalami aktivitas (bekerja) atau menghadapi persoalan yang diteliti.</p> <p>(5) Penentuan responden yang disurvei dengan <i>purposive sampling</i> didasarkan pada kriteria sebagai berikut :</p> <ul style="list-style-type: none"> <li>● Kalangan dunia usaha yang mewakili perusahaan yang bergerak di bidang, Perkebunan, Kehutanan, Peternakan, Perikanan, Pertambangan, Industri Pengolahan (Manufaktur), dan Perdagangan (tergantung dari keterwakilan karakteristik masing-masing daerah),</li> <li>● Mewakili perusahaan skala kecil, sedang, dan besar, berdasarkan modal usaha/ jumlah tenaga kerja.</li> <li>● Perusahaan yang berasal dari daerah yang bersangkutan (investor daerah setempat), dan</li> <li>● Perusahaan yang berasal dari luar daerah (cabang perusahaan, investor dari luar daerah, PMA, dlsb);</li> </ul> | <p>(4) With the use of said structured and systematically designed questionnaire, and the selection of respondents based on strong representativeness consideration, it is likely that data gathered through the questionnaire are highly objective in terms of knowledge, comprehension and reliance of individual respondent. This research makes it sure that the respondents are knowledgeable in their area due to their individual experience.</p> <p>(5) The following criteria are the bases in the selection of respondents:</p> <ul style="list-style-type: none"> <li>● Businessmen representing companies operating in the field of Plantation, Forestry, Animal Husbandry, Fishery, Mining, Manufacturing and Trading (depending on the representativeness of the characteristics of respective region),</li> <li>● Representing small, medium and big-scale corporation in terms of business capital or size of man power,</li> <li>● Local companies (local investor), and</li> <li>● Companies from other regions (branch, investor from outside the region, foreign investor, etc.);</li> </ul> |
|---------------------------------------------------------------------------------------------------------------------------------------------------------------------------------------------------------------------------------------------------------------------------------------------------------------------------------------------------------------------------------------------------------------------------------------------------------------------------------------------------------------------------------------------------------------------------------------------------------------------------------------------------------------------------------------------------------------------------------------------------------------------------------------------------------------------------------------------------------------------------------------------------------------------------------------------------------------------------------------------------------------------------------------------------------------------------------------------------------------------------------------------------------------------------------------------------------------------------------------------|------------------------------------------------------------------------------------------------------------------------------------------------------------------------------------------------------------------------------------------------------------------------------------------------------------------------------------------------------------------------------------------------------------------------------------------------------------------------------------------------------------------------------------------------------------------------------------------------------------------------------------------------------------------------------------------------------------------------------------------------------------------------------------------------------------------------------------------------------------------------------------------------------------------------------------------------------------------------------------------------------------------------------------------------------------------------------------------------------------------|

#### B.2.2. Profil Responden

- Responden berdasarkan status di perusahaan : terdiri dari 3.224 orang (58,5%) pemilik usaha, dan 2.286 (41,5%) pengelola usaha (level manager).
- Responden berdasarkan skala usaha (jumlah tenaga kerja) : 3.644 (76,3%) merupakan perusahaan kecil dengan pegawai kurang dari 20 orang, 897 (17,5%) perusahaan menengah dengan karyawan 20 s/d 100

#### B.2.2. Profile of Respondents

- Based on the position in the company: 3,224 of business owner (58.5%) and 2,286 of managers (41.4%)
- Based on size of man power: 3,644 (76.3%) of small enterprises with employees less than 20 people, 897 (17.5%) of medium enterprises with 20-100 employees, 319 (6.2%) of big enterprises employing more

orang, dan 319 (6,2%) perusahaan besar dengan jumlah tenaga kerja lebih dari 100 orang, sementara 280 (5,4%) tidak menjawab.

- Responden berdasarkan asal investor : 3.778 (73,5%) merupakan perusahaan lokal (dari daerah setempat), 376 (7,3%) perusahaan swasta dari luar daerah, 134 (2,6%) BUMN/ BUMD, dan 90 (1,8%) PMA, sementara 762 (14,8%) tidak menjawab.
- Responden berdasarkan bidang usaha : 1.005 (19,6%) Manufaktur, 60 (1,2%) Pertambangan, 76 (1,5%) Perkebunan, 3.371 (65,6%) Perdagangan dan Jasa, 230 (4,5%) Pertanian Pangan, 35 (0,7%) Kehutanan, 75 (1,5%) Perikanan, 226 (4,4%) bidang usaha lainnya.
- Responden berdasarkan Status Badan Hukum Usaha : 1.621 (31,5%) tidak Berbadan Hukum, 3.493 (68%) Berbadan Hukum.

than 100 people; whereas 280 respondents (5.4%) did not answer.

- Based on where the investor come from: 3,778 (73.5%) of local companies, 376 (7.3%) of private companies coming from other districts/municipalities, 134 (2.6%) of local government owned companies and state owned companies.
- Based on business sector: 1,005 (19.6%) Manufacture, 60 (1.2%) Mining, 76 (1.5%) Plantation, 3,371 (65.6%) Trade and Services, 230 (4.5%) Food-agriculture, 35 (0.7%) Forestry, 75 (1.5%) Fishery, and 226 (4.4%) Others.
- Based on legal status: 3,493 (68%) respondents have legal status, and 1,621 (31.5%) respondents have no legal status.

### B.3. Pengolahan Data dan Analisis Data

### B.3. Data Processing and Analysis

#### B.3.1. Pembobotan Faktor, Variabel, dan Indikator

#### B.3.1. Weighing of Factors, Variables and Indicators

Penentuan bobot faktor, variabel, dan indikator yang telah ditentukan untuk pemeringkatan daya tarik investasi Kabupaten/ Kota dilakukan dengan metode AHP (*The Analytic Hierarchy Proccess*) dengan bantuan perangkat lunak yang disebut '*Expert Choice*'.

The weight of factors, variables and indicators used in ranking the investment attractiveness of Regency/City were determined through AHP (The Analytical Hierarchy Process) with the help of a software program called '*Expert Choice*'.

AHP merupakan salah satu model untuk pengambilan keputusan yang dapat membantu kerangka berpikir manusia. Peralatan utama dari model ini adalah sebuah hirarkhi fungsional dengan input utamanya persepsi manusia. Pada dasarnya AHP adalah metode yang memecah suatu masalah yang kompleks dan tidak terstruktur ke dalam kelompok-kelompoknya, mengatur kelompok-kelompok tersebut ke dalam suatu hirarkhi; memasukkan nilai numerik sebagai pengganti persepsi manusia dalam melakukan perbandingan relatif dan akhirnya dengan suatu sintesa ditentukan elemen mana yang mempunyai prioritas tertinggi. Atau dengan kata lain, prinsip metode AHP adalah memberikan bobot tiap faktor, variabel, dan indikator dengan perbandingan antar faktor, variabel, indikator satu dengan lainnya. Bobot yang lebih besar dari suatu indikator, menunjukkan indikator yang lebih penting dibandingkan indikator lainnya dalam menentukan daya tarik investasi suatu daerah.

AHP is an instrument that aides people in making decision. The main tool of this instrument is a functional hierarchy with human perception as its main input. Basically, AHP is a method used to simplify a complex and unstructured problem, dividing said problem into smaller organized groups of problems and arranging the groups in a hierarchy, assigning a numeric value as substitute for human perception for the purpose of relative comparison, and finally through a synthetical process the highest priority can be determined. Or in other word, the underlying principle in AHP is giving a weight to every factor, variable and indicator in comparison with other factors, variables and indicators. The higher the weight of an indicator the more important it is compared to other indicator in determining investment attractiveness of a region.

Pembobotan dengan model AHP untuk faktor, variabel, dan indikator ditentukan melalui dua tahap, yaitu :

- Pertama pembobotan terhadap faktor, variabel dan indikator, pemeringkatan oleh 42 orang responden pengusaha daerah yang berasal dari 20 daerah penelitian lapangan (tahun 2002) dengan menggunakan kuesioner AHP. Hasil pembobotan 40 responden ini diolah dengan rata-rata geometris sehingga menghasilkan suatu '*bobot pengusaha daerah*'. Selain dilakukan oleh para pelaku usaha di daerah, pembobotan terhadap faktor, variabel, dan indikator pemeringkatan juga dilakukan oleh 8 orang pengusaha nasional dan 3 orang pengamat ekonomi. Hasil pembobotan oleh para pengusaha nasional, dan pengamat ekonomi, tersebut juga diolah dengan rata-rata geometris sehingga menghasilkan '*bobot pengusaha nasional, dan pengamat ekonomi*'.
- Tahap selanjutnya adalah dilakukan rata-rata geometris atas '*bobot pengusaha daerah*' dan '*bobot pengusaha nasional, dan pengamat ekonomi*' untuk menghasilkan bobot akhir faktor, variabel, dan indikator pemeringkatan.

#### B.3.2. Klasifikasi Intensitas Tiap Indikator

Sebelum diolah dengan '*expert choice*', setiap indikator baik yang berasal dari data primer maupun sekunder diklasifikasikan untuk memperoleh intensitas masing-masing.

- Data-data primer yang diperoleh dari kuesioner persepsi responden dari 200 daerah diolah dengan bantuan SPSS atau Exel sehingga diperoleh tabulasi yang menunjukkan intensitas tiap-tiap indikator pemeringkatan. Intensitas tersebut berupa skala *likert* 1 sampai dengan 5 yang menunjukkan ukuran dari kondisi yang paling buruk sampai kondisi yang paling baik.
- Indikator-indikator kuantitatif berupa data sekunder (*existing statistik data*), masing-masing juga diklasifikasikan dengan menggunakan '*metode rata-rata*' dan '*metode distribusi*' sehingga diperoleh intensitasnya ke dalam skala *likert* yang sama.

Through AHP model, the weight of factors, variables and indicators was determined following these two stages:

- 42 regional respondents (businessmen) from 20 regional field research areas were asked to rank the factor, variable and indicator using AHP questionnaire. The result of this weighing is then processed with geometrical average to produce a "local businessmen weight". In addition to the above respondents, the 7 national businessmen and 3 economic analysts were requested to rank the factor, variable and indicator. The ranking done by national businessmen and economic analysts was further processed through geometrical average producing a "national businessman and economic analyst weight"
- The next step done is calculating the geometrical average for the "local businessmen weight" and "national businessmen and economic analyst weight" to produce final weight of factors, variables and indicators for ranking purpose.

#### B. 3. 2. Classification of Intensity for Each Indicator

Before an indicator is processed with 'Expert Choice', every indicator either from primary or secondary data was classified to determine its intensity.

- Primary data collected through the questionnaire for respondents' perception of 200 areas were then processed using SPSS or Exel for tabulation showing the intensity of each indicator. The intensity was determined using the likert scale of 1-5, one as the worst condition and five as the best condition.
- The quantitative indicator in the form of secondary data (existing statistical data) was also classified using "average method" and "distribution method" to get the intensity to be put in the same likert scale.

### B.3.3. Penentuan Nilai Intensitas Tiap Indikator dan Peringkat

Intensitas masing-masing indikator kemudian dimasukkan ke dalam *data base* perangkat lunak '*expert choice*' berdasar hirarki dan bobot pemeringkatan yang telah ditentukan sebelumnya. Olahan perangkat lunak tersebut menghasilkan nilai masing-masing indikator yang secara kumulatif membentuk urutan peringkat nilai dari yang tertinggi sampai yang terendah diantara 200 daerah pemeringkatan. Metode penghitungan intensitas tiap-tiap Indikator dijelaskan pada *Lampiran 4.2. Metode Klasifikasi Intensitas Indikator Pemeringkatan*.

### B. 3.3. Determination of Intensity Weight of Each Indicator and Rank

The intensity of every indicator was then used as input in the database of 'Expert Choice' software following the previous hierarchy and ranking weight. The processing of the software results in the weight of each indicator, cumulatively forming the hierarchy of weight from the highest to the lowest for 134 ranking areas. Enclosed is the procedure in calculation of the rank based on calculation principles in 'Expert Choice' software. **(See Appendix 4.2. Classification Methode of Intensity of the Rating Indicator)**



## IV. PEMAPARAN HASIL PENELITIAN

### Research Findings

Survei ini dilakukan terhadap 200 Kabupaten / Kota (156 kabupaten dan 54 Kota) yang tersebar di 28 Propinsi yang ada di Indonesia. Survei dilakukan dalam kurun waktu Agustus 2003 sampai dengan pertengahan November 2003. Dalam penelitian tentang Pemeringkatan Daya Tarik Invesatasi Kabupaten/Kota di Indonesia pada tahun 2003 ini, selain peringkat daya tarik investasi daerah, juga ditemukan sejumlah persoalan yang dihadapi oleh dunia usaha di Indonesia pada era otonomi daerah. Persoalan-persoalan tersebut dapat mempengaruhi kinerja dunia usaha secara keseluruhan, dan daya tarik tiap-tiap daerah, bahkan Indonesia secara keseluruhan terhadap investasi. Berikut ini pemaparan temuan-temuan penelitian ini.

#### A. Peringkat Daya Tarik Investasi Daerah

Hasil pemeringkatan daya tarik investasi 200 Kabupaten/Kota (156 Kabupaten dan 54 Kota) disajikan berdasarkan peringkat secara umum dan berdasarkan peringkat masing-masing faktor (5 faktor). Penyajian seperti ini dimaksudkan agar diperoleh gambaran lengkap terhadap hasil akhir secara total, serta untuk mengetahui kelebihan dan kekurangan masing-masing daerah. Dalam pemeringkatan daya tarik investasi daerah untuk tahun 2003 dipisahkan antara peringkat kabupaten dan peringkat kota, karena pada dasarnya antara kabupaten dan kota mempunyai perbedaan karakteristik secara spesifik. Dalam pembahasan lamporan penelitian ini hanya ditampilkan hasil pemeringkatan kabupaten maupun kota yang menempati peringkat teratas dan terbawah (10 kabupaten dan 5 kota yang menempati peringkat teratas dan terbawah berdasarkan peringkat

This survey, which consists of 5,140 interviews with business operators, was conducted from August 2003 to November 2003 and covers 200 administrative areas (156 districts and 54 municipalities) in 28 provinces in Indonesia. Entitled "Investment Attractiveness Ratings of Districts and Municipalities in Indonesia in 2003," the study not only offers rankings of regions based on their levels of investment attractiveness, but also presents some of the problems business operators in Indonesia encounter in the era of regional autonomy. These factors influence the overall performance of the business community and the relative attractiveness of each region, and of Indonesia as a whole, to investors. Below is a description of the findings of this survey.

#### A. Rating Result

Each set of results for the investment attractiveness rating of 200 districts and municipalities is presented in two parts: a general rating, and a rating for each of five factors. This presentation is intended to give a complete picture of the final result, as well as to pinpoint the strengths and weaknesses of each region. Districts and municipalities are discussed separately, since each of these administrative area types has its own distinct characteristics. The discussion of research findings, however, focuses on the rating results for districts and municipalities that fall in the highest and lowest positions (the top and bottom ten districts and the top and bottom five municipalities), and their respective general ratings and ratings per factor. A detailed breakdown of the ratings of districts and municipalities in general, and by factor, variable

umum dan per faktor). Peringkat Kabupaten dan Peringkat Kota secara keseluruhan - berdasarkan peringkat umum maupun per faktor - ditampilkan pada bagian lampiran laporan (Lampiran 1. Hasil Pemeringkatan).

#### A.1. Peringkat Daerah Secara Umum (Berdasarkan Nilai Total)

Peringkat daya tarik investasi daerah secara umum diperoleh dari akumulasi seluruh faktor pemeringkatan (5 Faktor, 14 Variabel, dan 42 Indikator). Dari 5 faktor pembentuk daya tarik investasi daerah, faktor Kelembagaan mempunyai bobot paling besar yakni sebesar 31%, disusul faktor Sosial Politik sebesar 26%, faktor Ekonomi Daerah 17%, dan Faktor Tenaga Kerja & Produktivitas dan faktor Infrastruktur Fisik masing-masing sebesar 13% (Lihat Diagram 2. Bobot Faktor Pemeringkatan). Melihat struktur bobot masing-masing faktor pembentuk daya tarik investasi daerah tersebut tampak bahwa kondisi Kelembagaan dan Sosial Politik suatu daerah sangat berpengaruh terhadap daya tarik investasinya (peringkatnya).

and indicator are shown in the attachments.

#### A.1. General Ranking of Regions

The general ranking of regions according to their investment attractiveness is obtained by accumulating all the rating factors (5 factors, 14 variables and 42 indicators). Of the five factors that shape the attractiveness of regions towards investment, the most important are the Regulation & Government Service factor, which has a weighting of 31%, and the Socio-Political factor, with 26%. Regional Economic Dynamism accounts for 17% of the general rating, while Labor & Productivity and Physical Infrastructure make up 13% each (see diagram 2. Weight of Rating Factors)

Diagram/Figure 2.  
Bobot Faktor Pemeringkat/Weight of Rating Factors

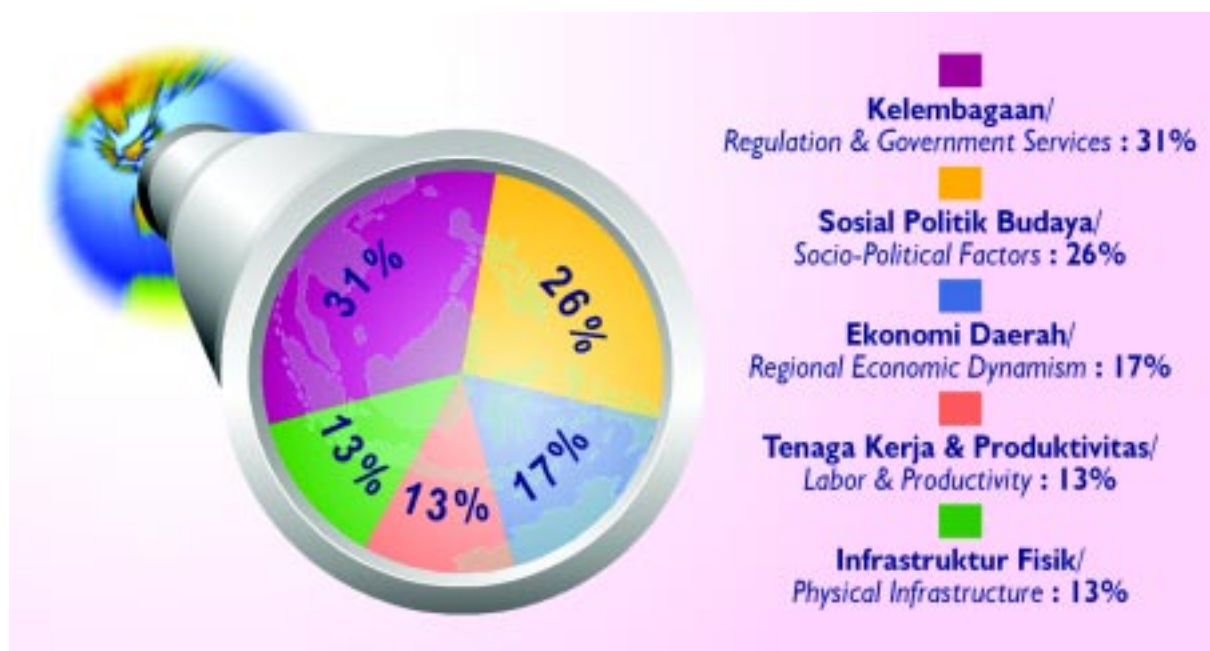

##### A.1.1. Peringkat Kabupaten Secara Umum

Dari 156 Kabupaten yang diperingkat diperoleh 146 peringkat daya tarik investasi daerah berdasarkan kategori umum, artinya ada beberapa daerah yang menempati peringkat yang sama (Lihat Lampiran 1.1.1. Peringkat Daya Tarik Investasi 156 Kabupaten di Indonesia dan Lampiran 1.1.2. Neraca

##### A.1.1. General Ranking of District

The 156 rated districts form 146 ranks under the general rating on investment attractiveness of regions, i.e. there are some instances where two or more regions occupy the same rank (see appendix 1.1.1. Ranking of Investment Attractiveness of 156 Districts, and appendix. 1.1.2. Strength and



Peringkat Faktor & Variabel Daya Tarik Investasi 156 Kabupaten di Indonesia). Grafik IV.1. memperlihatkan 10 Kabupaten yang berhasil menempati peringkat atas, dan 10 Kabupaten yang menempati peringkat bawah berdasarkan kategori umum. Dari 10 kabupaten yang menempati peringkat 10 teratas secara umum, 4 diantaranya merupakan daerah baru yang pada pemeringkatan tahun 2002 belum diperingkat, yakni : Kab. Purwakarta, Kab. Bulungan, Kab. Enrekang dan Kab. Jenepono. Peringkat pertama diduduki oleh Kab. Purwakarta yang baru pertama kali ikut rating, disusul oleh Kab. Magetan peringkat ke-2, Kab. Bulungan ke-3, Kab. Jembrana ke-4, Kab. Kuningan ke-5 dan Kab. Enrekang ke-6, dan seterusnya.

Weaknesses of 156 Districts by Factors and Variables). Graph IV.1. shows the ten districts that fill the top slots, and the ten districts at the bottom of the table. Four of the ten leading districts in the general category (Purwakarta, Bulungan, Enrekang and Jenepono) are new entrants, meaning that they were not included in the 2002 rating. The top position is held by Purwakarta (with a score of 0.3273), followed, in descending order, by Magetan (0.2983), Bulungan (0.2936) and Jembrana (0.2838), and Enrekang and Kuningan in joint fifth place with 0.2797.

### Grafik/Chart IV.1 Peringkat Kabupaten Secara Umum/General Ranking of District

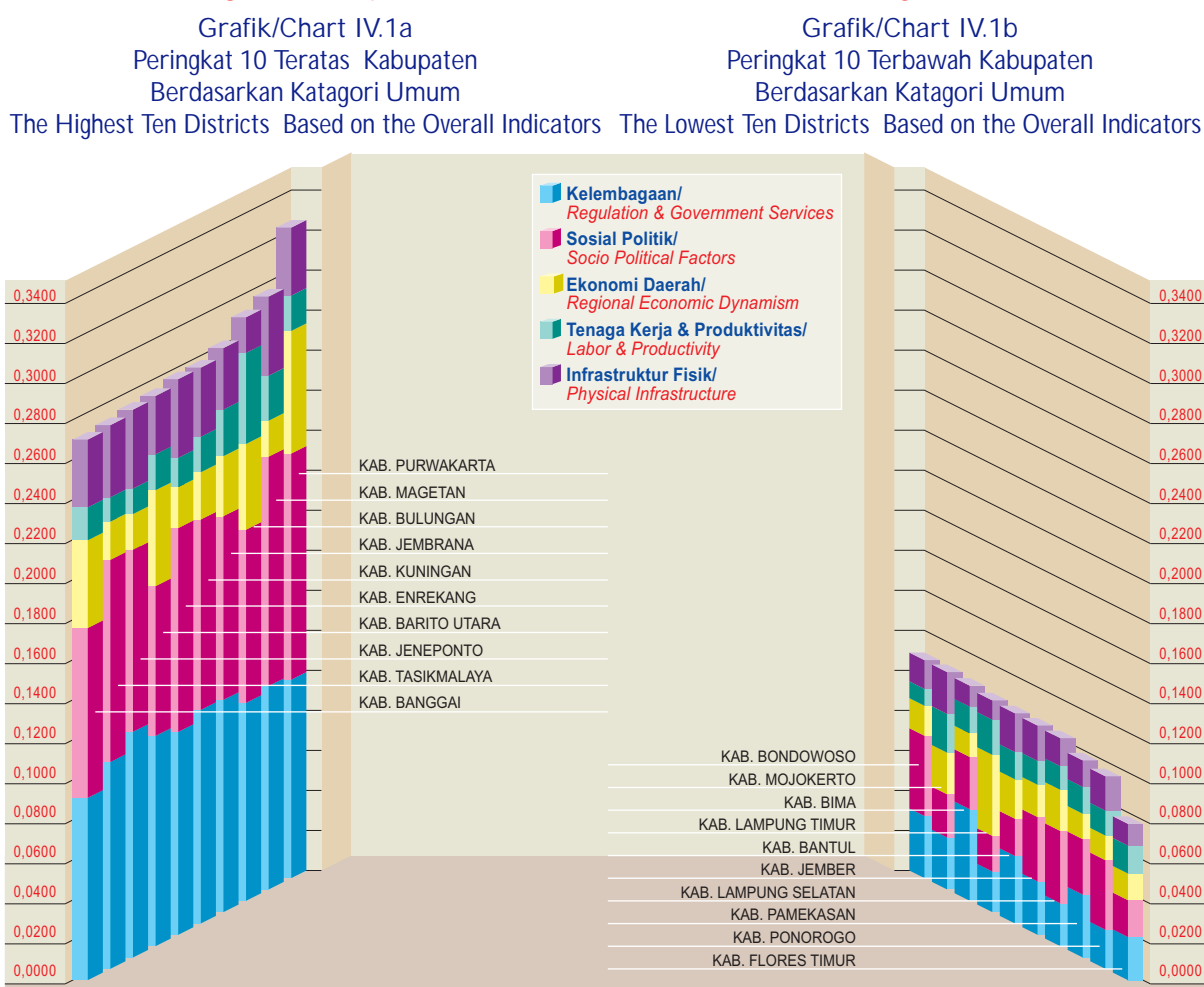

Walupun secara umum Kab. Purwakarta menduduki peringkat pertama, namun jika dilihat per faktor, dari kelima faktor pembentuk daya tarik investasi tidak satupun yang berada pada peringkat pertama dari 156 kabupaten yang diperingkat. Kab. Purwakarta berada pada

Even though Purwakarta District comes out on top in the general rating, it failed to gain that position in any of the five factors. Purwakarta leads the ranking thanks to its good ratings –number 14, two and three, respectively – in the three factors that carry the heaviest weightings. Its scores in

peringkat teratas karena secara rata-rata kelima faktor pemeringkatan yang dimilikinya termasuk dalam kategori baik - masuk dalam peringkat 20 ke atas - kecuali untuk faktor Tenaga Kerja dan Produktivitas yang menempati peringkat ke 70. Dari kelima faktor tersebut hanya Faktor Ekonomi Daerah Kab. Purwakarta yang lebih baik dibandingkan 9 daerah lain di peringkat atas, sementara empat faktor lainnya masih kalah dibandingkan dengan 9 daerah lainnya. Terhadap Kab. Magetan yang berada di peringkat ke-2 secara umum, Kab. Purwakarta hanya unggul pada faktor ekonomi daerah, sementara empat faktor lainnya kalah. Pada Faktor Kelembagaan, Kab. Purwakarta masih berada di bawah 8 daerah lainnya (Kab. Magetan, Kab. Jember, Kab. Kuningan dan Enrekang, Kab. Jember, Kab. Jember, Kab. Jember), dan hanya lebih baik dari Kab. Bulungan dan Kab. Banggai. Untuk faktor Sosial Politik Kab. Purwakarta berada pada posisi ke-2 di bawah Kab. Magetan. Tampaknya Kab. Purwakarta perlu memperhatikan masalah ketenagakerjaan, karena untuk faktor ini Purwakarta termasuk pada peringkat bawah (ke-70 dari 117 peringkat untuk faktor ini). Rendahnya peringkat Purwakarta untuk faktor ini disebabkan terutama oleh variabel biaya tenaga kerja yang dinilai kurang kompetitif. Namun untuk ketersediaan dan produktivitas tenaga kerja dinilai baik yakni berada pada peringkat ke-17.

Kabupaten-kabupaten yang menempati peringkat 10 terbawah karena rata-rata kelima faktor daya tarik investasi yang mereka miliki tidak baik, terutama untuk faktor kelembagaan dan sosial politik (keamanan) yang mempunyai bobot besar. Namun jika dilihat lebih dalam, beberapa daerah di peringkat bawah ini masih mempunyai keunggulan di beberapa variabel. Kab. Bondowoso yang secara umum menempati peringkat ke 139 (dari 148 peringkat), untuk variabel sosial politik (konflik sosial, unjuk rasa, dsb) berada pada peringkat ke-1, dan untuk variabel struktur ekonomi pada peringkat ke-5 dari 25 peringkat untuk variabel ini. Kab. Lampung Selatan yang menempati peringkat 145 secara umum, untuk variabel struktur ekonomi berada pada peringkat ke-4. Kab. Ponorogo dan Kab. Pamekasan, untuk variabel sosial politik masing-masing menempati peringkat ke-10 dan ke-20. Kab. Flores Timur yang tahun ini berada pada peringkat terbawah (148), karena secara rata-rata kelima faktor pemeringkatan yang dimilikinya tidak baik. Salah satu kelebihan yang dimiliki oleh Kab. Flores Timur adalah pada faktor Tenaga Kerja dan Produktivitas, yaitu untuk variabel biaya tenaga

the other two factors are less impressive, however: it ranks 26<sup>th</sup> for Physical Infrastructure and 70<sup>th</sup> for Labor & Productivity. Of the five factors, Regional Economic Dynamism is the only one where this district is able to rate well above the other ten regions that occupy the top ten ranks. For example, when compared with Magetan District, which is in second place overall, Purwakarta prevails only for the Regional Economic Dynamism factor, while for the other four it gets a lower rating. For Regulation & Government Service, Purwakarta ranks below eight of the other regions in the overall top ten, i.e. Jember, Sawahlunto, Sijunjung, Enrekang, Jember, Barito Utara, Tasikmalaya, Magetan and Kuningan Districts, and outshines only Bulungan and Banggai. For the Socio-Political factor, Purwakarta is in second position below Magetan. Purwakarta evidently needs to pay more attention to labor issues, since this is its lowest-ranking factor (70<sup>th</sup> out of 117 for Labor & Productivity). Its low rank in this factor is caused mainly by labor cost variable considered less competitive. Nevertheless for labor availability and productivity factor the region was rated well placing her to the 17<sup>th</sup> spot.

The districts that occupy the ten lowest places in the general ranking tend to have poor ratings for all five-investment attractiveness factors, and in particular for the Regulation & Government Service and Socio-Political factors, which have heavy weightings. However, it is worth noting that some of these regions do score well for selected variables. Bondowoso District, which is in the 137<sup>th</sup> spot (out of 146) in the general rating, leads the field for the Socio-Political variable (which consists of the Political Stability, Social Conflict, Strikes and Public Participation indicators) that forms part of the Socio-Political factor, and takes fifth place out of 25 for the Economic Structure variable (part of the Regional Economic Dynamism factor). Lampung Selatan District, which places at number 143 in the general rating, ranks fourth for the Economic Structure variable. Meanwhile, Ponorogo and Pamekasan occupy tenth and 20<sup>th</sup> place, respectively, for the Socio-Political variable. Flores Timur is the lowest-ranked (146<sup>th</sup>) district, owing to its poor overall scores in all five factors. One of Flores Timur's strengths is, however, its low labor cost; the Labor Cost variable therefore gains it high marks, placing

kerja yang dinilai cukup murah, dan untuk variabel ini Flores Timur menduduki peringkat ke-4 dari 17 peringkat.

Daerah-daerah yang berada pada peringkat bawah ini dapat menaikkan daya tarik investasinya dengan perbaikan-perbaikan untuk variabel-variabel dan indikator-indikator yang oleh para pelaku usaha diberi bobot baik, yakni terutama pada variabel yang bersifat *policy*. Dengan perbaikan kinerja pelayanan aparatur pemerintah, perbaikan kondisi sosial politik, keamanan, kepastian hukum, dan sebagainya daerah-daerah ini akan dapat meningkatkan daya tariknya terhadap investasi.

#### A.1.2. Peringkat Kota Secara Umum

Kota Batam Propinsi Riau menempati peringkat pertama secara umum dari 44 Kota yang diperingkat dengan perolehan total score 0,2805 dari score seluruh faktor, variabel, dan indikator yang digunakan untuk melakukan pemeringkatan. Score ini berbeda cukup jauh dengan peringkat kedua kategori ini yang diraih Kota Cirebon (0.2684) dan peringkat ketiga Kota Kediri (0.2641). Perolehan score Kota Batam tersebut tidak mengherankan karena Batam ada pada peringkat lima tertinggi di 3 (tiga) faktor yaitu faktor Ekonomi Daerah (4) Sosial Politik (3), dan Infrastruktur Fisik (5); sedangkan di faktor Tenaga Kerja & Produktivitas di peringkat 6 (enam) serta peringkat 9 (sembilan) di faktor Kelembagaan.

Peringkat pertama Kota Batam tersebut cukup jauh meninggalkan peringkat kedua Kota Cirebon yang hanya menempati posisi 5 (lima) peringkat teratas di 2 (dua) faktor yaitu faktor Ekonomi Daerah (1) dan Tenaga Kerja & Produktivitas (2). Demikian juga, peringkat ketiga yang didapat Kota Kediri tertinggal dari Kota Batam karena hanya menempati posisi peringkat 5 (lima) teratas di 3 (tiga) faktor yaitu faktor Sosial Politik (5), Ekonomi Daerah (5) dan Tenaga Kerja & Produktivitas (1).

Kalau dilihat sepiantas, dimana Kota Kediri yang ada di posisi peringkat 5 (lima) teratas dari 3 (tiga) faktor dan Kota Cirebon yang ada di posisi peringkat 5 (lima) teratas hanya dari 2 (dua) faktor, mestinya Kota Kediri yang berada di peringkat kedua. Namun hal lain yang mesti diperhatikan adalah bobot masing-masing faktor pemeringkatan tersebut yang memberi bobot besar pada faktor kelembagaan (31%), dimana Kota Cirebon pada faktor Kelembagaan ini menduduki peringkat 15 (score 0.0536) sementara Kota Kediri ada di posisi 22 (score 0.0487). Perbedaan score

the region in the fourth rank out of 17.

The regions with the lowest scores can increase their investment attractiveness by improving the variables and indicators that are given large weightings by business players – these are mainly related to policymaking. By improving the performance of the government apparatus, as well as the socio-political climate, security, legal certainty and other conditions, the administrations of these regions can help ensure that they become more attractive to investors.

#### A.1.2. General Ranking of Municipalities

The 44 municipalities in the survey form 43 ranks in the general rating, as two municipalities share the number 17 position. Batam Municipality in Riau Province takes first place, with a total score of 0.2805. Cirebon is the number two-ranked municipality, with a score of 0.2684 and Kediri is the number three, with 0.2641. It is not surprising to see Batam at the head of the list, given that it ranks in the top five for three factors, namely Socio-Political (third), Regional Economic Dynamism (fourth) and Physical Infrastructure (fifth), and has the sixth highest score for Labor & Productivity and the ninth for the Regulation & Government Service factor.

Cirebon Municipality is in the top five for just two factors; however, it gets very high scores for those factors, namely Regional Economic Dynamism (first place) and Labor & Productivity (second). Kediri, which is in the third spot, ranks in the top five in three factors: Socio-Political (fifth), Regional Economic Dynamism (fifth) and Labor & Productivity (first).

With top-five ratings in three categories, it might, at first glance, appear that Kediri should be placed second overall, rather than Cirebon. However, it is important to remember that the five factors are given different weightings. For the Regulation & Government Service factor, which has the highest weighting (31%), Cirebon ranks 15<sup>th</sup> (with a score of 0.0536) while Kediri is in 22<sup>nd</sup> place (with 0.0487). The difference between these scores, and also between scores gained for some other indicators, (details can be seen in the attachment) puts Cirebon in a better position than Kediri.

tersebut, dan juga pada beberapa indikator lainnya (lihat score lengkap pada lampiran), menyebabkan posisi Kota Cirebon lebih baik dari Kota Kediri.

Bila kita lihat score tiap faktor untuk Kota Cilegon (peringkat 4) dan Kota Sawahlunto (peringkat 5), kedua kota ini mempunyai peluang untuk mencapai peringkat yang lebih baik karena pada faktor kelembagaan yang mempunyai bobot terbesar, keduanya lebih baik dibandingkan kota-kota peringkat I, II, dan III. Namun karena score faktor-faktor lainnya kurang mendukung, maka kedua kota tersebut harus puas di peringkat 4 (empat) dan 5 (lima); Kota Cilegon faktor Sosial Politik yang berada di peringkat kedua dari bawah (39) sangat tidak mendukung perolehan score total, begitu juga dengan Kota Sawahlunto yang hanya mendapat score rata-rata menengah untuk 3 (tiga) faktor yaitu Infrastruktur Fisik, Tenaga Kerja & Produktivitas, dan Ekonomi Daerah.

Cilegon Municipality (which is in fourth place) and Sawahlunto Municipality (fifth) both receive high scores for the Regulation & Government Service factor; in both cases, the scores are higher than those gained by the municipalities in the top three positions. Sawahlunto takes first place for the Socio-Political factor, but is held back the fact that its Regulation & Government Service factor ranking is lower than Cilegon's, and by its middling scores for the remaining three factors – Physical Infrastructure, Labor & Productivity and Regional Economic Dynamism – and ends up at number five in the general rating. Cilegon, meanwhile, is dragged down by its poor performance in the Socio-Political factor, for which it receives the second lowest ranking, and comes in at number four overall.

## Grafik/Chart IV.2 Peringkat Kota Secara Umum/General Ranking of Municipalities

Grafik/Chart IV.2a  
Peringkat 5 Teratas Kota  
Berdasarkan Katagori Umum  
The Highest Municipalities  
Based on the Overall Indicators

Grafik/Chart IV.2b  
Peringkat 5 Terbawah Kota  
Berdasarkan Katagori Umum  
The Lowest Five Municipalities  
Based on the Overall Indicators

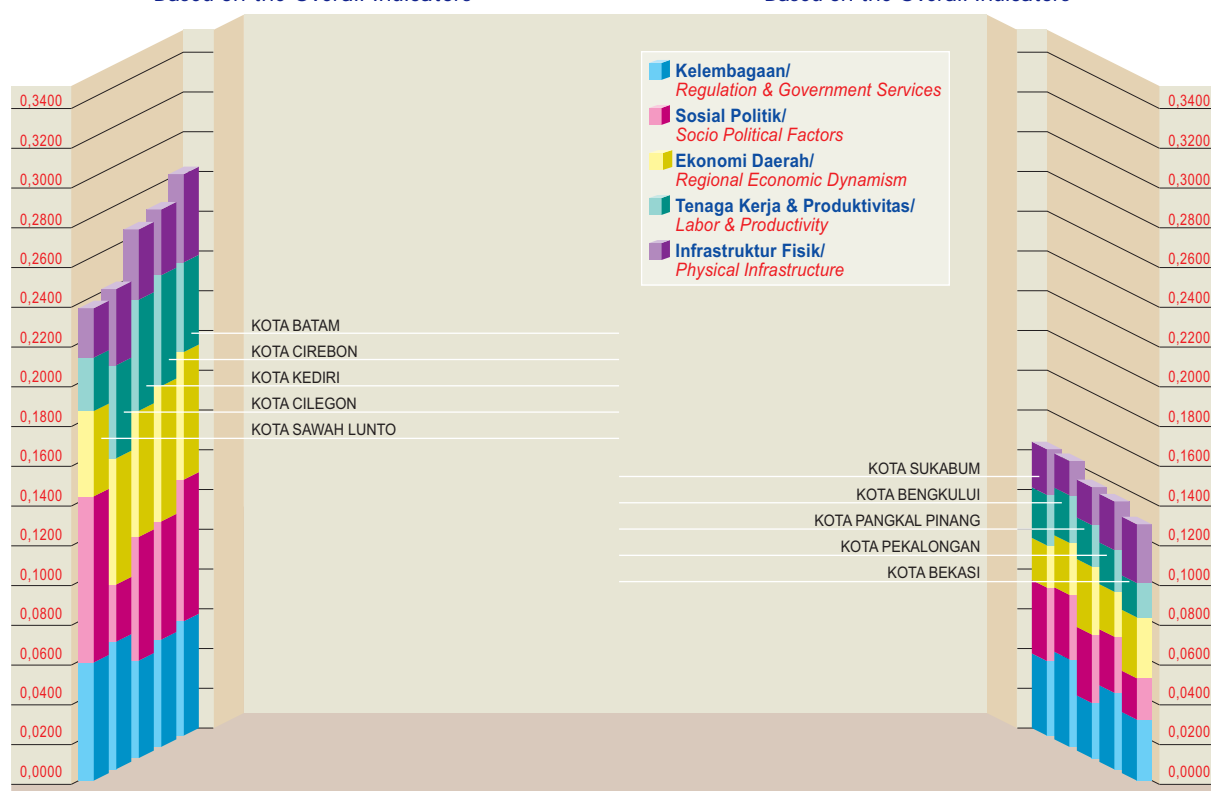

Dalam urutan 5 (lima) peringkat terbawah terdapat Kota Bekasi di peringkat paling bawah (peringkat 43 score 0,1366), kemudian disusul Kota

In the lowest five slots we find the municipalities of Bekasi (in 43<sup>rd</sup> and last place, with a score of 0.1366), Pekalongan (0.1426), Pangkal

Pekalongan (peringkat 42 score 0,1426), Kota Pangkal Pinang (peringkat 41 score 0,1442), Kota Bengkulu (peringkat 40 score 0,1521), dan Kota Sukabumi (peringkat 39 score 0,1524). Dibandingkan dengan score peringkat terbaik yaitu 0,2805 yang dicapai Kota Batam, peringkat 5 (lima) kota terendah sangat jauh perbedaan score-nya. Perbedaan score yang terlihat mencolok antara lima kota peringkat teratas dibandingkan dengan score lima kota peringkat terbawah secara merata terdapat pada faktor Tenaga Kerja & Produktivitas serta Infrastruktur Fisik. Sedangkan untuk faktor-faktor lainnya juga terdapat perbedaan signifikan, namun tingkat perbedaan antara kelompok lima kota teratas dan lima kota terbawah - diluar faktor Tenaga Kerja & Produktivitas dan Infrastruktur Fisik - sangat bervariasi. Misalnya untuk faktor Sosial Politik; Kota Pekalongan, Pangkal Pinang dan Bengkulu masih lebih baik score-nya bila dibandingkan peringkat keempat Kota Cilegon. Kota Pangkal Pinang untuk score faktor Ekonomi Daerah juga tidak kalah dengan Kota Gorontalo yang ada di peringkat 6 (enam) dengan score sama 0,0361. Dalam hal Kelembagaan, Kota Sukabumi, Pekalongan dan Bengkulu, walaupun kalah dibandingkan kelompok kota lima teratas, namun masih lebih baik dibandingkan Kota Surabaya yang ada di peringkat 12.

Untuk Kota Bekasi, tidak mengherankan bila berada di peringkat paling rendah karena untuk 3 (tiga) faktor yaitu faktor Kelembagaan, Sosial Politik, dan Tenaga Kerja & Produktivitas ada dalam kelompok 5 (lima) peringkat terendah. Karena besarnya bobot faktor Kelembagaan (31%) dan Sosial Politik (26%), score yang didapat dari indikator lainnya tidak membantu daerah ini untuk mendapat peringkat yang lebih baik. Dengan menelusuri asal muasal score total yang menempatkan posisi peringkat masing-masing kota, posisi peringkat tersebut menunjukkan kekuatan maupun kelemahan masing-masing kota yang berguna untuk fokus perbaikan. Peringkat 44 Kota Berdasarkan Score Total dapat dilihat pada Lampiran 1.2.1; Lampiran 1.2.2; dan untuk Score masing-masing Faktor, Variabel, dan Indikator dapat dilihat pada Lampiran 4.6.2.

#### A.2. Faktor Kelembagaan

Peringkat daerah berdasarkan Faktor Kelembagaan diperoleh dari akumulasi score tiap indikator yang tergabung dalam faktor tersebut. Indikator-indikator dalam faktor Kelembagaan dapat dikelompokkan menjadi 4 variabel; yakni

Pinang (0.1442), Bengkulu (0.1521) and Sukabumi (0.1524). At 0.2805, the score achieved by Batam, which is the highest-ranked municipality, is more than twice as high as that given to Bekasi. However, a municipality's scores for each of the five factors do not necessarily correlate well with its overall rating. For example, for the Socio-Political factor, Pekalongan, Pangkal Pinang, Bengkulu and Sukabumi (all of which have very low overall ratings) boast better score than Cilegon, which receives the fourth-highest general rating. For the Regional Economic Dynamism factor, Pangkal Pinang gets the same score as Gorontalo (0.0361), which ranks sixth overall. Although Sukabumi, Pekalongan and Bengkulu receive lower marks than the top five municipalities for the Regulation & Government Service factor, these three municipalities do beat Surabaya, which comes in at number 12 in the general rating.

It is not surprising to see Bekasi Municipality occupy the lowest rank overall, given that its scores for three factors (Regulation & Government Service, Socio-Political and Labor & Productivity) are all in the bottom five. Because of the heavy weightings of the first two of these factors, this region is unable to use its relatively reasonable scores in the Regional Economic Dynamism and Physical Infrastructure factors to obtain a better ranking. By examining the scores achieved for each of the variables and indicators that make up the five factors for which the municipalities are rated, we can pinpoint the individual strengths and weaknesses of each region (see appendix 1.2.1. Ranking of Investment Attractiveness of 44 Municipalities, appendix 1.2.2. Strength and Weaknesses of 44 Municipalities by Factors and Variables, and appendix 4.6.2. Score of Factor, Variable and Indicator of 44 Municipalities). This information can, in turn, help the administrations of these regions to determine which areas to focus their efforts on.

#### A.2. The Regulation & Government Service Factor

Rankings for the Regulation & Government Service factor are determined by the scores gained for each of the variables and indicators it comprises. This factor consists of four variables: Legal Certainty (which has a 39% weighting),

variabel Aparatur dan Pelayanan, variabel Kepastian Hukum, variabel Keuangan Daerah, dan variabel Peraturan Daerah (Perda). Dari keempat variabel tersebut variabel Kepastian Hukum mempunyai bobot yang paling besar yakni 39%, disusul variabel Perda 25%, Aparatur dan Pelayanan 22%, dan terakhir variabel Keuangan Daerah sebesar 14%. Bila dilihat lebih dalam ke tiap-tiap indikator, bobot terbesar adalah indikator Perda (yang juga merupakan variabel) yakni sebesar 25%, diikuti oleh indikator Penegakan Hukum sebesar 17%, dan Pelayanan Birokrasi sebesar 10% (*Lihat Diagram 3. Bobot Indikator Faktor Kelembagaan*). Terlihat bahwa indikator Perda dan indikator Penegakan Hukum di suatu daerah sangat berpengaruh terhadap peringkat daerah berdasarkan faktor Kelembagaan ini.

Regional Regulation (25%), Quality of Civil Service (22%) and Regional Finance (14%). The four variables are made up of a total of nine indicators, of which Local Regulation (which is also a variable) is the most significant, accounting for 25% of the score for this factor. The Law Enforcement indicator is also important, with 17% of the factor, while Quality of Civil Service represents 15% (see diagram 3: Weight of Indicators and Variables in the Regulation & Government Service factor).

Diagram/Figure 3.  
Faktor Kelembagaan/ Regulation & Government Service

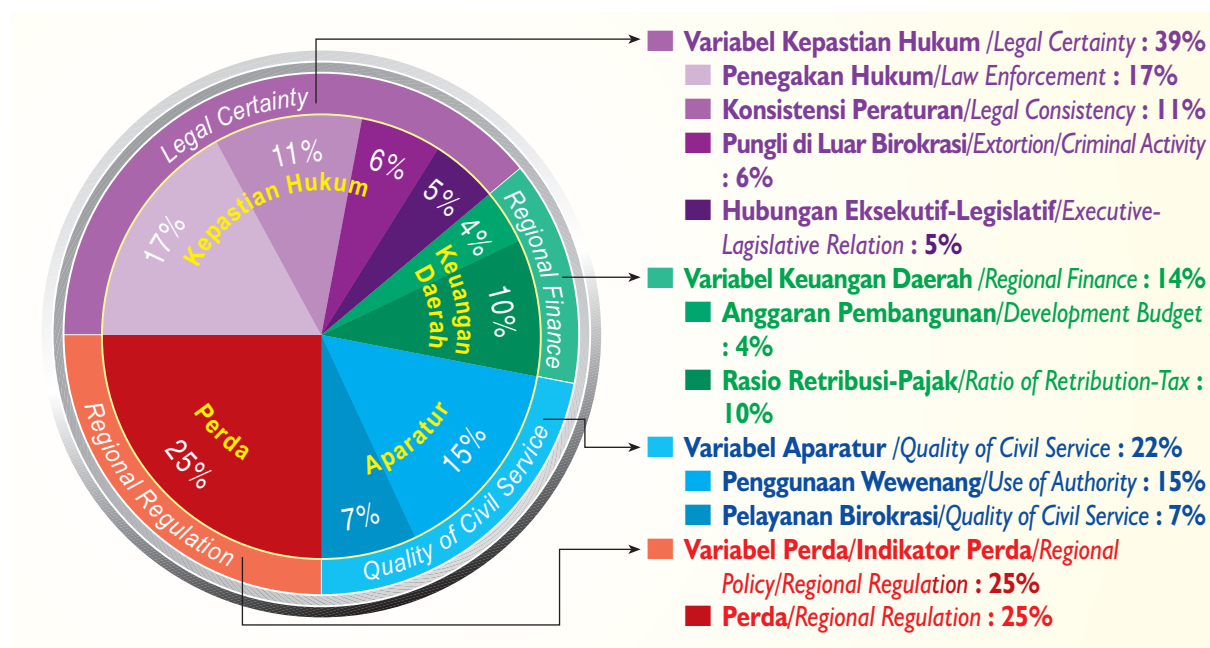

#### A.2.1. Peringkat Kabupaten Berdasarkan Faktor Kelembagaan

Peringkat Daya Tarik Investasi Berdasarkan Faktor Kelembagaan diperoleh dari total score 4 variabel dan 9 indikator dalam faktor kelembagaan ini. Dari 156 Kabupaten yang diperingkat, untuk faktor kelembagaan menghasilkan 138 peringkat, artinya ada beberapa daerah yang menempati peringkat yang sama. Bobot faktor Kelembagaan yang besar (31%) sangat berpengaruh terhadap peringkat daerah secara umum. Hal ini terbukti dari 10 daerah yang menempati peringkat teratas pada faktor Kelembagaan, untuk peringkat secara

#### A.2.1. Ranking of District Based on The Regulation & Government Service Factor

For the Regulation & Government Service factor, the 156 rated districts are arranged in 138 ranks, meaning that in some instances, a single rank is held by more than one region. This factor's heavy weighting (31%) means that it is the single most important determinant of the general ranking of regions. This is borne out by the fact that the ten regions with the highest ratings for the Regulation & Government Service factor are also among the top 25 regions in the general rating. For this factor, Jeneponto District heads the rating



umum juga berada pada kelompok atas yakni termasuk dalam 25 besar teratas. Untuk faktor Kelembagaan Kab. Jeneponto berhasil menduduki peringkat pertama, disusul Kab. Sawahlunto, Cianjur, Enrekang, Jembrana, Barito Utara, Tasikmalaya, Tanjung Jabung Timur, dan Magetan (Grafik.IV.3). Sepuluh daerah di atas berhasil menempati peringkat 10 teratas untuk faktor kelembagaan, karena secara rata-rata indikator-indikator pembentuk faktor ini dinilai baik oleh para pelaku usaha yang ada di daerah yang bersangkutan.

list, followed by Sawahlunto Sijunjung, Cianjur, Pelalawan, Enrekang, Jembrana, Barito Utara, Tasikmalaya, Tanjung Jabung Timur and Magetan (Graph V.3). In other words, business operators in these ten districts have a relatively favorable view of the indicators that constitute the Regulation & Government Service factor.

**Grafik/Chart IV.3**  
**Peringkat Kabupaten Berdasarkan Faktor Kelembagaan/**  
**Rating of Districts Based on Region Regulation & Government Services**

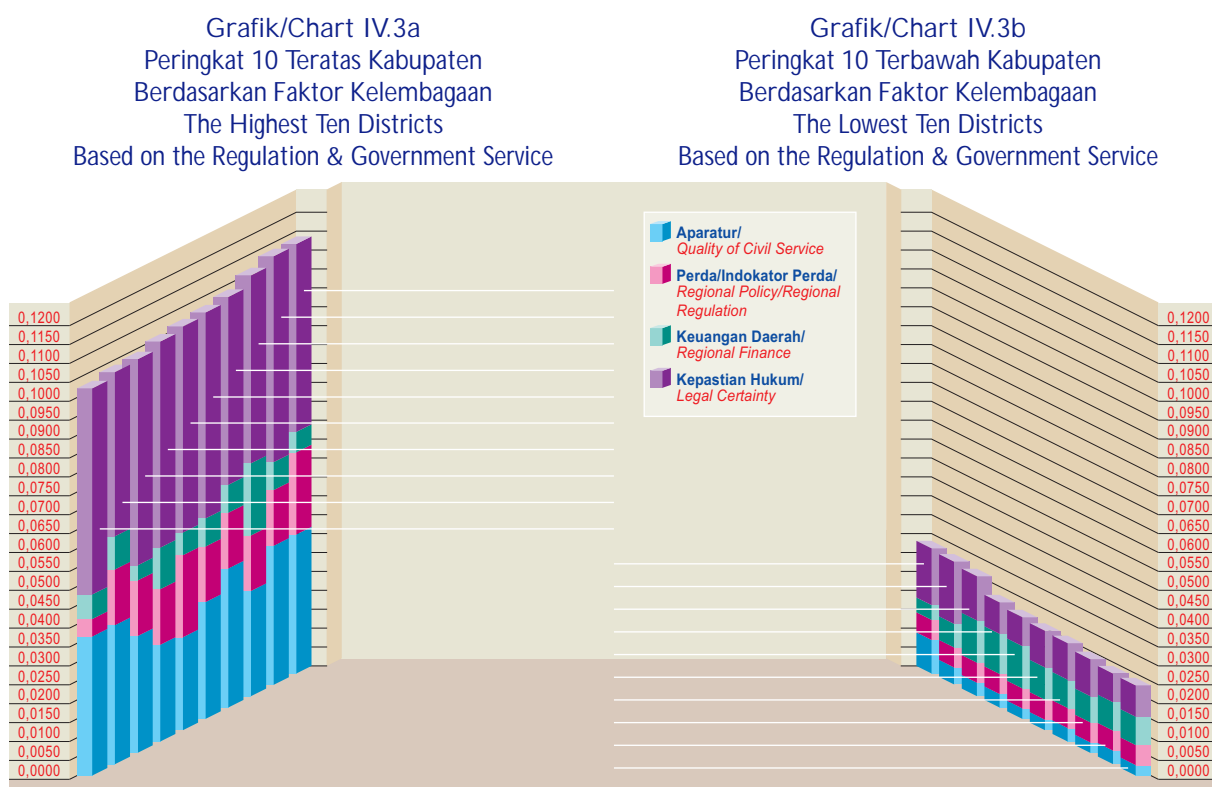

Ke-10 daerah yang menempati peringkat atas untuk faktor Kelembagaan, tidak secara otomatis setiap indikatornya baik. Kab. Jeneponto yang menempati peringkat pertama untuk kategori ini memiliki kelemahan pada variabel Keuangan Daerah. Dilihat dari struktur APBD, Kab. Jeneponto dan Kab. Tasikmalaya (ke-9), memperlihatkan potensi permasalahan di masa yang akan datang. Untuk indikator struktur pungutan daerah dan komitmen pemerintah terhadap pembangunan fisik, kedua daerah ini mempunyai nilai kurang. Dari indikator rasio retribusi terhadap pajak - untuk melihat struktur pungutan daerah - terlihat ada indikasi bahwa struktur pungutan daerah tidak

Nevertheless, these ten regions do not manage to score well in every indicator. Jeneponto District, which takes first place in this category, has a weak Regional Finance variable. This indicates that Jeneponto, along with Tasikmalaya (which is in eighth position, and also gets a poor score for this variable), could encounter problems with the regional budget (APBD) in the future. These two districts receive low ratings for both the User Charges-Tax Ratio indicator and the Development Budget-Regional Budget Ratio indicator.

Across the country, the business operators who took part in the survey said that they prefer to make payments to their respective local administrations in



jelas dengan banyaknya pungutan retribusi dibandingkan pajak daerah. Selanjutnya dari rasio anggaran pembangunan terhadap APBD, tampaknya komitmen pemerintah daerah Kab. Jeneponto dan Tasikmalaya, untuk pembangunan infrastruktur fisik masih kurang, yang terlihat dari sebagian besar APBD dianggarkan untuk kegiatan rutin. Hal ini berpotensi terjadi penyimpangan dan sulit dalam mengukur pertanggungjawabannya. Pada peringkat ke-3, Kab. Pelalawan harus lebih memperhatikan kinerja aparaturnya, karena para pelaku usaha di Kab. Pelalawan menilai bahwa penyalahgunaan wewenang oleh aparat pemda masih cukup tinggi. Untuk itu pemda harus segera membenahinya, agar tidak mengganggu kinerja pelaku usaha, dan daya tarik investasi daerahnya.

Kabupaten-kabupaten yang menempati peringkat terbawah untuk faktor Kelembagaan disebabkan nilai-nilai indikator untuk faktor Kelembagaan secara rata-rata rendah. Rendahnya peringkat untuk faktor Kelembagaan ini berdampak langsung terhadap peringkat secara umum daerah-daerah yang bersangkutan. Kesepuluh daerah yang menempati peringkat terbawah untuk faktor Kelembagaan ini, secara umum juga berada pada peringkat bawah. Kab. Ponorogo yang menempati peringkat terendah, hampir semua indikator kelembagaannya juga rendah. Peringkat terbawah yang diperoleh Kab. Ponorogo terutama disebabkan rendahnya indikator pelayanan birokrasi, penyalahgunaan wewenang, perda, konsistensi peraturan, dan penegakan hukum. Sementara Kab. Lampung Timur memperoleh nilai terendah untuk indikator komitmen pemda dalam melakukan pembangunan infrastruktur fisik. Dampak dari rendahnya komitmen Pemda Lampung Timur terhadap pembangunan infrastruktur fisik, tercermin dari penilaian para pelaku usaha di sana yang menilai infrastruktur fisik di Kab. Lampung Timur, baik dari segi ketersediaan maupun kualitasnya, dinilai kurang memadai. Peringkat 156 Kabupaten Berdasarkan Faktor Kelembagaan dapat dilihat pada Lampiran 1.1.2; Lampiran 1.1.3; dan untuk Score masing-masing Faktor, Variabel, dan Indikator dapat dilihat pada Lampiran 4.6.1.1.

#### A.2.2. Peringkat Kota Berdasarkan Faktor Kelembagaan

Kategori ini menghasilkan 42 peringkat dari 44 Kota karena terdapat kota yang sama di 2 (dua) peringkat masing-masing diisi 2 (dua) kota. Kota Mojokerto di Jawa Timur menempati peringkat teratas dengan score 0,0801 disusul Kota Tegal

the form of taxes, rather than as user charges and other levies that are not transparent. In both Jeneponto and Tasikmalaya, the low User Charges-Tax Ratio indicators show that user charges make up a larger share of these districts' revenues than do taxes, and thus that their local government revenue structures have poor transparency. Meanwhile, it appears that the local governments of Jeneponto and Tasikmalaya are poorly committed to physical infrastructure development, as can be seen from their low Development Budget-Regional Budget Ratio indicators. This also implies that deviation is likely, and that accountability could be difficult to measure.

Pelalawan District, which is in third place for the Regulation & Government Service factor, must pay more attention to the behavior of its government apparatus, since the business players in the area believe that it has a tendency to abuse its authority. Therefore, the Pelalawan administration must take immediate steps to eliminate these practices in order to avoid any erosion of the region's currently high level of attractiveness to both potential investors and existing business operators.

Just as the districts that score well on the Regulation and Government Service factor tend to also gain high general ratings, those that get low marks for this important factor are usually found at the lower end of the general ratings table. Ponorogo District, which occupies the lowest rank for this factor, gets particularly poor scores for the Quality of Civil Service, Use of Authority, Regional Regulation, Legal Consistency and Law Enforcement indicators. Lampung Timur, which is ranked number 136 out of 138, has the lowest value for the Development Budget-Regional Budget Ratio indicator. This district also gets a low score for its government's commitment to physical infrastructure development, as well as for the Physical Infrastructure variables for both availability and quality that make up the Physical Infrastructure factor. See appendix 1.1.3. Ranking of Investment Attractiveness of Regulation and Government Service Factor of 156 Districts, appendix 1.1.2. Strength and Weaknesses of 156 Districts by Factors and Variables, and appendix 4.6.1.1. Score of Factor, Variable and Indicator of Regulation and Government Service factor of 156 Districts).

#### A.2.2. Ranking of Municipalities Based on The Regulation & Government Service Factor

This category produces 42 ranks for 44 municipalities, since there are two instances where two municipalities share the same rank. Mojokerto Municipality in East Java ranks first with a score

(0,0731) dan Kota Bandung (0,0703). Score yang baik dalam variabel Aparatur & Pelayanan Birokrasi dan Kepastian Hukum menempatkan Mojokerto pada peringkat pertama kategori ini. Sayangnya untuk variabel Keuangan Daerah masih agak lemah, jauh dibawah Kota Cilegon yang menempati posisi kelima. Pelayanan Birokrasi terhadap aktivitas usaha yang dipersepsikan baik oleh para pelaku usaha dan kecilnya penyalahgunaan wewenang mengangkat score Mojokerto.

of 0.0801. While Mojokerto gets good scores for the Quality of Civil Service and Legal Certainty variables, its rating for the Regional Financial variable is far below that given to Cilegon, which is at number five for the Regulation & Government Service factor.

#### Grafik/Chart IV.4 Peringkat Kota Berdasarkan Faktor Kelembagaan/ Rating of Municipalities Based on Region Regulation & Government Services

Grafik/Chart IV.3a  
Peringkat 5 Teratas Kota  
Berdasarkan Faktor Kelembagaan  
The Highest Five Municipalities  
Based on the Regulation & Government Service

Grafik/Chart IV.3b  
Peringkat 5 Terbawah Kota  
Berdasarkan Faktor Kelembagaan  
The Lowest Five Municipalities  
Based on the Regulation & Government Service

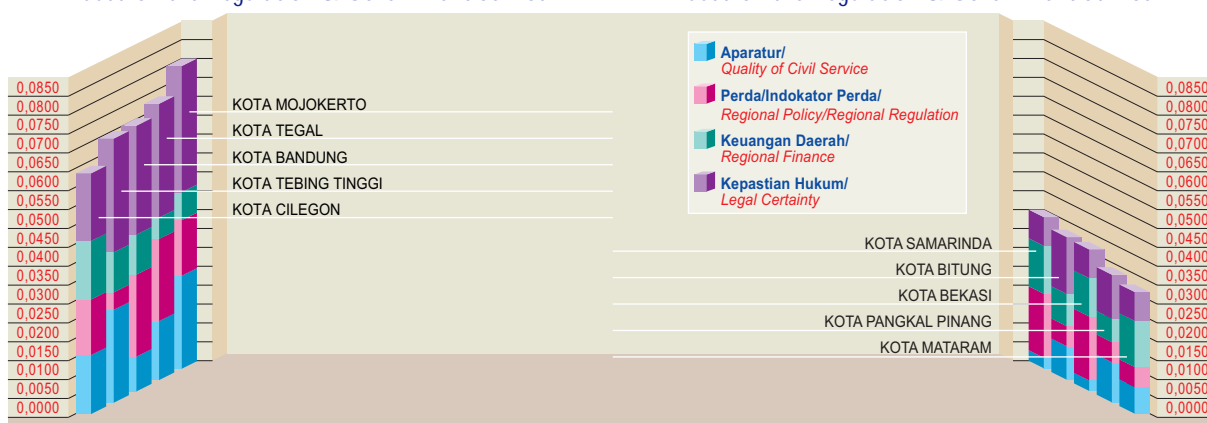

Sedangkan Kota Tegal dan Kota Bandung menempati posisi kedua dan ketiga terutama karena variabel (sekaligus sebagai indikator tunggal) Peraturan Daerah (Perda) yang dianggap baik oleh para pelaku usaha di daerah tersebut, lebih baik daripada 3 (tiga) kota kota lain di kelompok peringkat lima teratas kategori Kelembagaan. Sayangnya Kota Tegal memiliki kelemahan pada variabel Keuangan Daerah karena struktur pungutan di daerah tersebut menunjukkan bahwa rasio retribusi terhadap pajak lebih besar dibanding daerah-daerah lain. Dalam hal ini, meskipun bukan merupakan suatu kemutlakan namun ada potensi Kota Tegal lemah struktur pungutan daerahnya karena pada umumnya pajak lebih jelas struktur pungutannya dibandingkan retribusi. Sedangkan Kota Bandung mempunyai kelemahan utama dalam variabel Aparatur dan Pelayanan yang dinilai kurang baik. Kota Tebing Tinggi memiliki peluang peringkat lebih baik di kategori ini karena score variabel Aparatur & Pelayanan Birokrasi sama dengan

Tegal and Bandung are in second and third place with 0.0731 and 0.0703, respectively, mainly because they both get top-ranking scores for the Regional Regulation variable (which consists of a single indicator). Tegal, however, has a weak Regional Financial variable owing to its poor User Charges-Tax Ratio indicator. The low score for this indicator implies that the greater part of the municipality's revenue comes from user charges, which are often applied in an arbitrary manner and can be hard to trace. Bandung's rating is primarily checked by its poor showing for the Quality of Civil Service variable. In contrast, Tebing Tinggi Municipality does well in this variable, and gains the same score as the top-ranked Mojokerto. Its low value for the Regional Regulation variable pushes Tebing Tinggi down into fourth place, however.

peringkat terbaik Kota Mojokerto; namun karena tidak didukung score baik di variabel Perda menyebabkan posisinya ada di peringkat keempat.

Sementara itu, peringkat 5 (lima) kota terbawah diisi oleh Kota Mataram (peringkat 41 score 0,0279), Pangkal Pinang (peringkat 40 score 0,0293), Bekasi (peringkat 39 score 0,0325), Bitung (peringkat 38 score 0,0327), dan Samarinda (peringkat 37 score 0,0347). Kota Mataram berada di posisi terendah karena rendahnya score variabel Perda dan Aparatur & Pelayanan Birokrasi. Meskipun dalam hal Aparatur & Pelayanan Birokrasi, Kota Mataram masih lebih baik daripada Kota Bekasi, yaitu dua tingkat di atas Kota Mataram, namun Kota Bekasi jauh lebih unggul di faktor Perda dibandingkan Kota Mataram. Peringkat 44 Kota Berdasarkan Faktor Kelembagaan dapat dilihat pada Lampiran 1.2.2; Lampiran 1.2.3; dan untuk Score masing-masing Faktor, Variabel, dan Indikator dapat dilihat pada Lampiran 4.6.2.1.

The five lowest ranks are filled by Mataram (ranked number 42, with a score of 0.0279), Pangkal Pinang (0.0293), Bekasi (0.0325), Bitung (0.0327) and Samarinda (0.0347). Mataram's low scores in the Regional Regulation and Quality of Civil Service variables put it at the bottom of the list for this factor. Nonetheless, Mataram does manage to gain a better score for the Quality of Civil Service variable than Bekasi, which is ranked second for the Local Regulation variable. See appendix 1.2.3 Ranking of Investment Attractiveness of Regulation and Government Service Factor of 44 Municipalities, appendix 1.2.2. Strength and Weaknesses of 44 Municipalities by Factors and Variables, and appendix 4.6.2.1. Score of Factor, Variable and Indicator Regulation and Government Service factor of 44 Municipalities)

Diagram/Figure 4.  
Faktor Sosial Politik/Socio-Political Factor

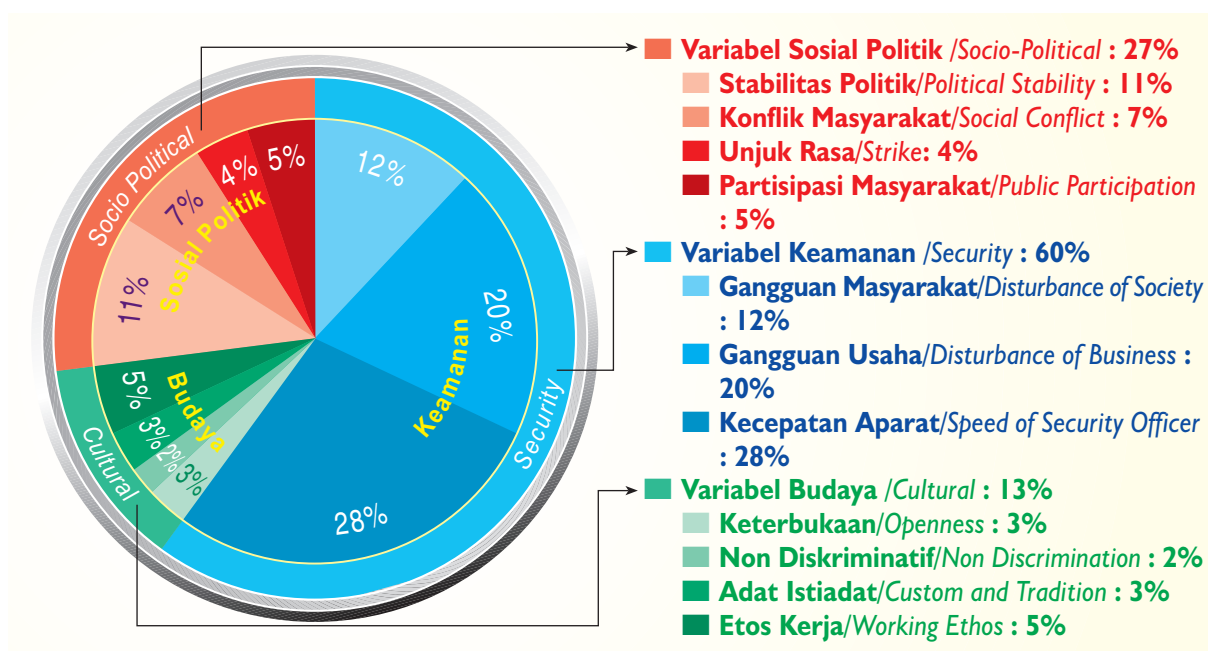

### A.3. Faktor Sosial Politik

Terhadap peringkat secara umum faktor Sosial Politik memiliki bobot sebesar 26%, dengan demikian score faktor Sosial Politik cukup banyak berpengaruh terhadap peringkat daerah tersebut berdasarkan kategori umum. Peringkat Kabupaten berdasarkan Faktor Sosial Politik terbentuk dari akumulasi score 3 variabel (Keamanan, Sosial

### A.3. The Socio-Political Factor

With a weighting of 26%, the Socio-Political factor also has a significant influence on the ranking of regions under the general category. The Socio-Political factor is an accumulation of scores in three variables (Security, Socio-Political, and Cultural), which in turn consist of 11 indicators. Of the three variables under this factor, Security has by far the

Politik, dan Budaya), yang terbagi lagi dalam 11 indikator. Dari 3 variabel pada faktor Sosial Politik ini, variabel Keamanan memiliki bobot terbesar yakni sebesar 60%, disusul oleh variabel Sosial Politik (27%), dan Budaya (13%) (Lihat Diagram 4. Bobot Indikator Faktor Sosial Politik). Melihat struktur bobot variabel dan indikator pada faktor Sosial Politik ini, dapat dipastikan bahwa peringkat Kabupaten berdasarkan faktor Sosial Politik sangat dipengaruhi oleh kondisi keamanan daerah yang bersangkutan.

#### A.3.1. Peringkat Kabupaten Berdasarkan Faktor Sosial Politik

Berdasarkan faktor Sosial Politik, dari 156 kabupaten yang di peringkat diperoleh 122 peringkat, artinya ada beberapa daerah yang berada pada peringkat yang sama. 10 kabupaten berhasil menempati peringkat teratas berdasarkan faktor Sosial Politik, karena rata-rata nilai variabel Sosial Politik baik. Untuk peringkat kabupaten berdasarkan faktor Sosial Politik, peringkat pertama diraih oleh Kab. Magetan, disusul oleh Purwakarta ke-2, Kab. Belu ke-3, dan seterusnya hingga peringkat ke-122 adalah Kab. Deliserdang (Lampiran 1.1.4. Peringkat Kabupaten Berdasarkan Faktor Sosial Politik). Dari 10 Kabupaten yang menempati peringkat 10 teratas, secara umum masih berada pada peringkat yang cukup baik yakni minimal berada pada peringkat ke-41 untuk kategori umum, yaitu Kab. Tegal (Grafik IV.5).

Kab. Magetan berhasil menduduki peringkat pertama untuk kategori ini, karena untuk variabel keamanan dan variabel budaya juga berada pada peringkat pertama, sementara untuk variabel Sosial Politik juga masih termasuk baik yakni berada pada peringkat ke-12 dari 63 peringkat untuk variabel Sosial Politik. Kab. Purwakarta berada di peringkat ke-2, karena untuk variabel budaya berada di peringkat ke-3, lebih rendah dibandingkan Magetan yang berada di peringkat ke-1.

Daerah-daerah yang berada pada peringkat atas untuk faktor Sosial Politik ini bukan berarti sempurna untuk seluruh variabel dan indikator yang mereka miliki. Ada beberapa kelemahan di sejumlah variabel dan indikator daerah-daerah peringkat atas ini. Sebagai gambaran Kab. Tasikmalaya yang berada di peringkat ke-7 untuk faktor Sosial Politik, mempunyai kelemahan pada variabel Sosial Politik (peringkat ke-48 dari 63 peringkat). Kelemahan Kab. Tasikmalaya pada variabel Sosial Politik terutama pada indikator intensitas unjuk rasa dan potensi konflik

greatest weighting, at 60%, followed by the Socio-Political variable (27%) and the Cultural variable (13%) (see diagram 4: Weight of Indicators and Variables in the Socio-Political factor)

#### A.3.1. Ranking of Districts Based on The Socio-Political Factor

The 156 rated districts form 130 ranks for the Socio-Political factor, meaning that several ranks are shared. This category is led by Magetan District, while Purwakarta takes second place, and Belu ranks third. Deli Serdang brings up the rear at number 130 (see appendix 1.1.4. Ranking of Districts Based on the Socio-Political Factor).

Magetan District receives the top ranking for the Security and Cultural variables, but comes in at number 12, out of 63 ranks, for the Socio-Political variable. Purwakarta District shares Magetan's ratings for the Socio-Political and Security variables, but is in third place for the Cultural variable.

The top ten districts in the Socio-Political factor rating do not necessarily score well in all variables or indicators. For instance, Tasikmalaya, which is in seventh place for the Socio-Political factor, has a weak Socio-Political variable (ranked 48 out of 63) on account of its poor performance in all indicators except Public Participation. However, Tasikmalaya makes up for its low score in this variable with its superior performance in the Security and Cultural variables. Tegal District, meanwhile, ranks tenth for the Socio-Political factor, but 15<sup>th</sup> for the Socio-Political variable.

masyarakat. Jika dibandingkan dengan Kab. Tegal yang berada pada peringkat ke-10 untuk faktor Sosial Politik, peringkat variabel Sosial Politik yang dimiliki Tasikmalaya (48) lebih rendah dibandingkan dengan peringkat Kab. Tegal yang berada di peringkat 15 untuk variabel yang bersangkutan. Kelebihan Kab. Tasikmalaya dibandingkan dengan Kab. Tegal untuk faktor Sosial Politik adalah pada variabel Keamanan dan Budaya.

Grafik/Chart IV.5

Peringkat Kabupaten Berdasarkan Faktor Sosial Politik/  
Rating of Districts Based on Socio-Political Factor

Grafik/Chart IV.5a

Peringkat 10 Teratas Kabupaten  
Berdasarkan Faktor Sosial Politik

The Highest Ten Districts Based on Socio-Political Factors

Grafik/Chart IV.5b

Peringkat 10 Terbawah Kabupaten  
Berdasarkan Faktor Sosial Politik

The Lowest Ten Districts Based on Socio-Political Factors

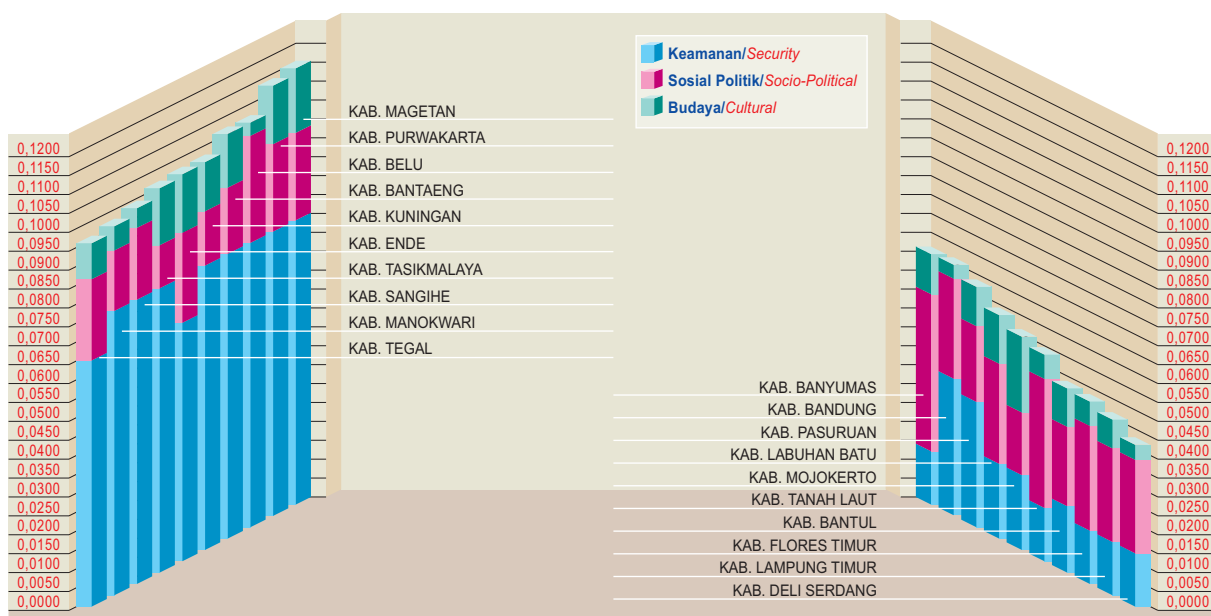

Dengan membandingkan hasil yang diperoleh Kab. Tegal (peringkat 10) dengan Kab. Sangihe (peringkat 8), tampak bahwa variabel Keamanan sangat menentukan peringkat daerah berdasarkan faktor Sosial Politik. Untuk variabel Sosial Politik, Kab. Sangihe berada pada peringkat ke-20 dan untuk variabel Budaya pada peringkat ke-40, lebih rendah dibandingkan dengan Kab. Tegal yang berada di peringkat ke-15 untuk variabel Keamanan dan peringkat ke-22 untuk Budaya. Namun untuk peringkat berdasarkan faktor Sosial Politik, Kab. Tegal berada di bawah Kab. Sangihe. Hal ini terjadi karena untuk variabel Keamanan, Kab. Sangihe lebih baik dibandingkan Kab. Tegal, yakni berada pada peringkat ke-1 dari 48 peringkat, sementara Kab. Tegal berada pada peringkat 2. Sedikit perubahan pada variabel

If we compare the Socio-Political factor ratings gained by Tegal (tenth) and Sangihe (eighth), we can see the extent to which the Security variable influences the rankings. Sangihe comes in at number 20 for the Socio-Political variable, and at number 40 for the Cultural variable, while Tegal gets higher scores for both (15<sup>th</sup> place for the Socio-Political variable and 22<sup>nd</sup> place for the Cultural variable). Even so, Tegal ranks below Sangihe for the Socio-Political factor since, for the Security variable, Sangihe takes first place above Tegal, which ranks second out of 48. Thanks to its hefty 60% weighting, a small change in the Security variable has a big effect on the Socio-Political factor rating – it is, in fact, the single most important variable in the overall rating, with close to 16%.

Keamanan akan berpengaruh besar pada daya tarik daerah secara keseluruhan.

Kabupaten-kabupaten yang berada pada peringkat bawah berdasarkan faktor Sosial Politik, secara umum peringkatnya juga berada di bawah. Dari 10 kabupaten peringkat bawah berdasarkan faktor Sosial Politik, semuanya berada pada peringkat antara 130 hingga 148. Peringkat ke-120 untuk faktor Sosial Politik yang diperoleh Kab. Flores Timur, mengakibatkan daerah ini secara umum berada pada peringkat ke-148, Kab. Deliserdang yang berada pada peringkat ke-122 (peringkat terendah) untuk faktor Sosial Politik, untuk peringkat secara keseluruhan juga berada pada peringkat ke-131. Contoh di atas membuktikan bahwa kondisi Sosial, Politik, dan Budaya suatu daerah sangat berpengaruh terhadap daya tariknya terhadap investasi. Peringkat 156 Kabupaten Berdasarkan Faktor Sosial Politik dapat dilihat pada Lampiran 1.1.2; Lampiran 1.1.4; dan untuk Score masing-masing Faktor, Variabel, dan Indikator dapat dilihat pada Lampiran 4.6.1.2.

#### A.3.2. Peringkat Kota Berdasarkan Faktor Sosial Politik

Untuk faktor Sosial Politik yang meliputi variabel Keamanan, Sosial Politik, dan Budaya dari 11 (sebelas) indikator yang ada, menghasilkan 40 urutan peringkat dari 44 Kota; hal ini karena ada satu peringkat yang diduduki 2 (dua) kota dan ada satu peringkat lainnya yang diisi 4 (empat) kota dengan score yang sama.

Dari urutan 40 peringkat, didapati bahwa Kota Sawahlunto menempati urutan teratas dengan score 0,0830 diikuti peringkat kedua sampai kelima secara berurutan yaitu Kota Gorontalo (score 0,0810), Kota Batam (score 0,0708), Kota Manado (score 0,0637), dan Kota Kediri (score 0,0618). Dari variabel keamanan yang diindikasikan dari 3 (tiga) indikator yaitu Gangguan Keamanan terhadap Aktivitas Usaha, Gangguan Keamanan di Masyarakat dan Kecepatan Aparatur dalam Menangani Gangguan Keamanan; Kota Sawahlunto dan Kota Gorontalo sama-sama mendapat nilai tertinggi (0,0548). Keunggulan Sawahlunto terhadap Gorontalo yang menempatkannya di peringkat pertama adalah pada variabel Sosial Politik yang dinilai sedikit lebih baik daripada Gorontalo.

Variabel yang mendukung Kota Batam menempati peringkat ketiga dalam kategori faktor ini, mengungguli Kota Manado dan Kota Kediri, adalah variabel Keamanan; sedangkan score variabel Sosial Politik sama untuk ketiga kota ini.

The districts that receive the lowest rankings based on the Socio-Political factor generally also occupy the lowest positions in the overall rating. Flores Timur, which is in 128<sup>th</sup> place for the Socio-Political factor takes the lowest (146<sup>th</sup>) position in the general rating, while Deliserdang, which is 130<sup>th</sup> (the lowest rank) for the Socio-Political factor, occupies the 129<sup>th</sup> position overall. The above examples prove that social, political and cultural conditions have a lot of influence over the regions' investment attractiveness. (See appendix 1.1.4. Ranking of Investment Attractiveness of Socio-Political Factor of 156 Districts, appendix 1.1.2. Strength and Weaknesses of 156 Districts by Factors and Variables, and appendix 4.6.1.2. Score of Factor, Variable and Indicator of Socio Political Factor of 156 Districts)

#### A.2.2. Ranking of Municipalities Based on Socio-Political Factor

The Socio-Political factor, which comprises the Security, Socio-Political and Cultural variables and eleven indicators, produces 40 ranks for 44 municipalities; one rank is shared by two municipalities, and another is occupied by four municipalities with the same scores.

The top five municipalities in this category are Sawahlunto (with a score of 0.0830), Gorontalo (0.0810), Batam (0.0708), Manado (0.0637) and Kediri (0.0618). Sawahlunto and Gorontalo share the highest score (0.0548) for the Security variable, which consists of three indicators, namely Disturbances to Business Activities, Disturbances to Society, and Speed of Security Officers in Handling Security Disturbances. Although Sawahlunto's score for the Cultural variable is lower than Gorontalo's, it still manages to edge out Gorontalo for the top position thanks to its slightly higher rating for the Socio-Political variable, which carries the higher weighting.

Although all three municipalities get similar scores for the Socio-Political variable, Batam beats Manado and Kediri to the third place in this category, thanks to its vastly superior performance in the Security variable. Manado, in particular,



Kota Manado terutama cukup jauh tertinggal dari sisi Keamanan, namun cukup baik untuk variabel Budaya. Sedangkan Kota Kediri meskipun lebih unggul dalam hal Sosial Politik dibanding Manado namun tidak didukung variabel Budaya sehingga menempatkan posisinya satu tingkat dibawah Manado.

does quite poorly in the Security variable; however, it obtains the highest rating for the Cultural variable. Kediri, which has a higher rating than Manado for the Socio-Political variable, is let down by its Cultural variable score, and ends up one position below Manado.

### Grafik/Chart IV.6 Peringkat Kota Berdasarkan Faktor Sosial Politik/ Rating of Municipalities Based on Socio-Political Factor

Grafik/Chart IV.6a  
Peringkat 5 Teratas Kota  
Berdasarkan Faktor Sosial Politik  
The Highest Five Municipalities Based on Socio-Political Factors

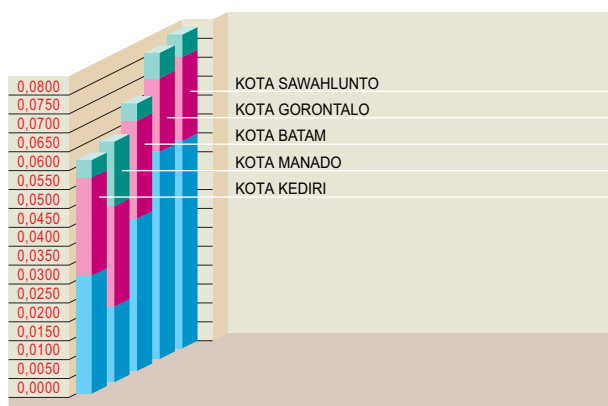

Grafik/Chart IV.6b  
Peringkat 5 Terbawah Kota  
Berdasarkan Faktor Sosial Politik  
The Lowest Five Municipalities Based on Socio-Political Factors

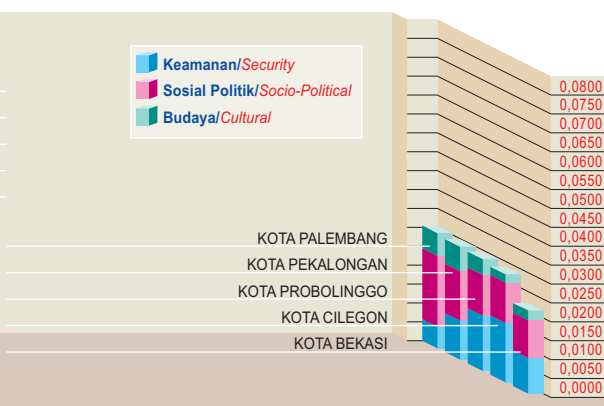

Kota Bekasi yang berdekatan dengan Ibukota Jakarta menempati urutan terakhir (40) untuk peringkat kategori Sosial Politik dengan score 0,0220. Urutan selanjutnya dalam kategori 5 (lima) peringkat terbawah adalah Kota Cilegon (peringkat 39 score 0,0286), Kota Probolinggo (peringkat 38 score 0,0296), Kota Pekalongan (peringkat 37 score 0,0299), dan Kota Palembang (peringkat 36 score 0,0305). Meskipun score dalam variabel Sosial Politik Kota Bekasi tidak terlalu berbeda dengan Kota Cilegon dan Probolinggo, namun score-nya yang rendah untuk variabel Keamanan yang berada di bawah Kota Cilegon, Probolinggo, dan Pekalongan, tidak mendukung score lainnya sehingga menempatkannya di peringkat terbawah kategori ini. Sementara itu, Kota Palembang sebetulnya mempunyai kemungkinan untuk lebih baik peringkatnya karena didukung score-nya yang baik dalam hal Sosial Politik, jauh di atas empat kota kelompok peringkat terbawah ini. Sayangnya kota ini tidak mampu menciptakan keamanan yang baik di daerahnya karena oleh pelaku usaha di Palembang score Keamanan dinilai sangat rendah, yang menyebabkannya berada dalam kelompok 5 (lima) peringkat terbawah ini. Peringkat 44 Kota

Bekasi Municipality, which is near the Special Capital Region of Jakarta, is ranked last (40<sup>th</sup>) for the Socio-Political factor, with a score 0.0220. Directly above Bekasi, we find Cilegon with a score of 0.0286, Probolinggo (0.0296), Pekalongan (0.0299) and Palembang (0.0305). Bekasi's total for the Socio-Political variable is only slightly lower than the scores achieved by Cilegon and Probolinggo, and its Cultural variable score is slightly above Cilegon's. However, its weak showing for the important Security variable puts Bekasi firmly in the lowest rank for this factor. Meanwhile, Palembang's score for the Socio-Political variable is far higher than the scores awarded to the four municipalities that rank below it for the Socio-Political factor. Unfortunately, this municipality is unable to create secure conditions, as reflected in the low Security variable it is given by the local business community. Thus, Palembang is unable to rise above the bottom five for this factor. (See appendix 1.2.4. Ranking of Investment Attractiveness of Socio-Political Factor of 44 Municipalities, appendix 1.2.2. Strength and Weaknesses of 44 Municipalities by Factors and Variables, and appendix 4.6.2.2. Score of Factor, Variable and Indicator of Socio Political Factor of 44 Municipalities)



Berdasarkan Faktor Sosial Politik dapat dilihat pada Lampiran 1.2.2; Lampiran 1.2.4; dan untuk Score masing-masing Faktor, Variabel, dan Indikator dapat dilihat pada Lampiran 4.6.2.2.

#### A.4. Faktor Ekonomi Daerah

Faktor Ekonomi Daerah memberikan kontribusi terhadap pembentukan daya tarik investasi sebesar 17%. Faktor Ekonomi Daerah terdiri dari dua variabel, yakni variabel Potensi Ekonomi dengan bobot 71%, dan variabel Struktur Ekonomi dengan bobot 29%. Variabel Potensi Ekonomi terdiri dari 3 indikator yaitu; PDRB Perkapita, Pertumbuhan Ekonomi (Pertumbuhan

#### A.4. The Regional Economic Dynamism Factor

The Regional Economic Dynamism factor accounts for 17% of the general rating of regional investment attractiveness. This factor consists of two variables, namely Economic Potential (with a weighting of 71%) and Economic Structure (with 29%). The Economic Potential variable consists of 3 indicators: Gross Regional Domestic Product Per Capita (GRDP Per Capita), with a 29% weighting

Diagram/Figure 5.  
Faktor Ekonomi Daerah/Regional Economic Dynamism

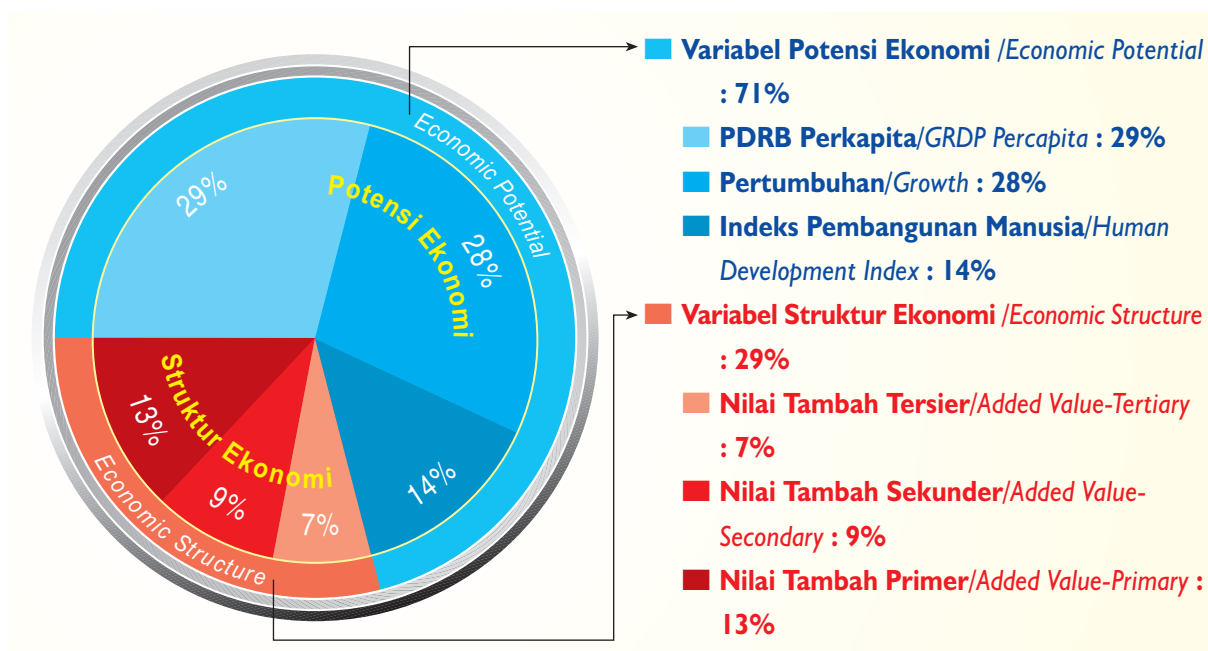

PDRB), dan Indeks Pembangunan Manusia (IPM). Sementara untuk variabel Struktur Ekonomi Daerah, juga terdiri dari 3 indikator yakni, Nilai Tambah Sektor Primer, Nilai Tambah Sektor Sekunder, dan Nilai Tambah Sektor Tersier. Dari 6 Indikator pembentuk faktor Ekonomi Daerah, indikator PDRB Perkapita mempunyai bobot paling besar yakni sebesar 29%, disusul Pertumbuhan Ekonomi 28%, IPM 14%, Nilai Tambah Primer 13%, Sekunder 9%, dan terakhir Nilai Tambah Tersier sebesar 7% (Lihat Diagram 5. Bobot Indikator Faktor Ekonomi Daerah). Dilihat dari bobot variabel dan indikator-indikator pada faktor Ekonomi Daerah ini, tampak bahwa variabel Potensi Ekonomi dan indikator-indikator di dalamnya mempunyai kontribusi terbesar dalam

within this factor; Economic Growth (GRDP Growth), at 28%; and Human Development Index (HDI), with 14%. The Economic Structure variable also comprises 3 indicators, namely Primary Sector Added Value, weighted at 13%; Secondary Sector Added Value, with 9%; and Tertiary Sector Added Value, at 7%. With its 71% weighting within the Regional Economic Dynamism factor, the Economic Potential variable is the largest variable in the of investment attractiveness ranking of Regional Economic Dynamism factor. (see diagram 5: Weight of Indicators and Variables in the Regional Economic Dynamism factor)

perolehan score daya tarik daerah terhadap investasi berdasarkan faktor Ekonomi Daerah.

#### A.4.1. Peringkat Kabupaten Berdasarkan Faktor Ekonomi Daerah

Dari 156 Kabupaten yang diperingkat, berdasarkan Faktor Ekonomi Daerah diperoleh 114 peringkat. Indikator-indikator yang tergabung dalam variabel Potensi Ekonomi memberikan sumbangan yang sangat besar terhadap peringkat daerah berdasarkan Faktor Ekonomi Daerah. Dari daerah yang berada pada peringkat atas untuk kategori ini hampir semua indikator dalam variabel potensi ekonominya bisa dikatakan sempurna (Grafik IV.7).

#### A.4.1. Ranking of District Based on The Regional Economic Dynamism Factor

When rated for the Regional Economic Dynamism factor, the 156 districts examined form 114 ranks. The indicators grouped under the Economic Potential variable make by far the largest contribution to the ranking of regions under this factor. Accordingly, the leading regions in this category have consistently high scores for the Economic Potential variable and its indicators. (Graph IV.7).

Grafik/Chart IV.7

### Peringkat Kabupaten Berdasarkan Faktor Ekonomi Daerah/ Rating of Districts Based on Regional Economic Dynamism

Grafik/Chart IV.7a  
Peringkat 10 Teratas Kabupaten  
Berdasarkan Faktor Ekonomi Daerah  
The Highest Ten Districts  
Based on Regional Economic Dynamism

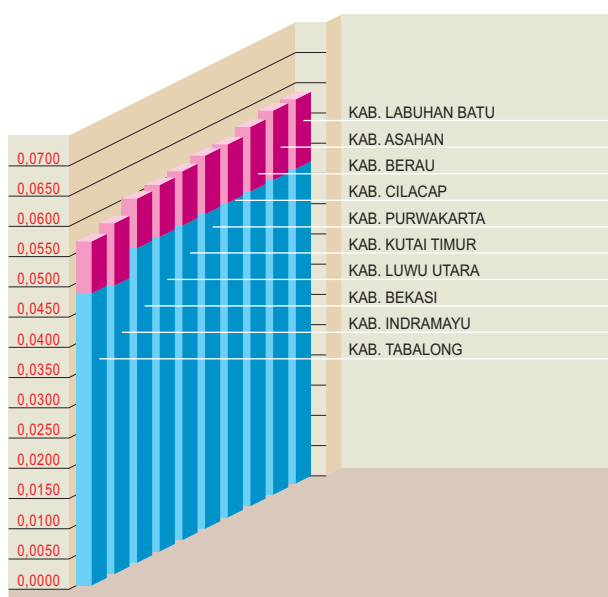

Grafik/Chart IV.7b  
Peringkat 10 Terbawah Kabupaten  
Berdasarkan Faktor Ekonomi Daerah  
The Lowest Ten Districts  
Based on Regional Economic Dynamism

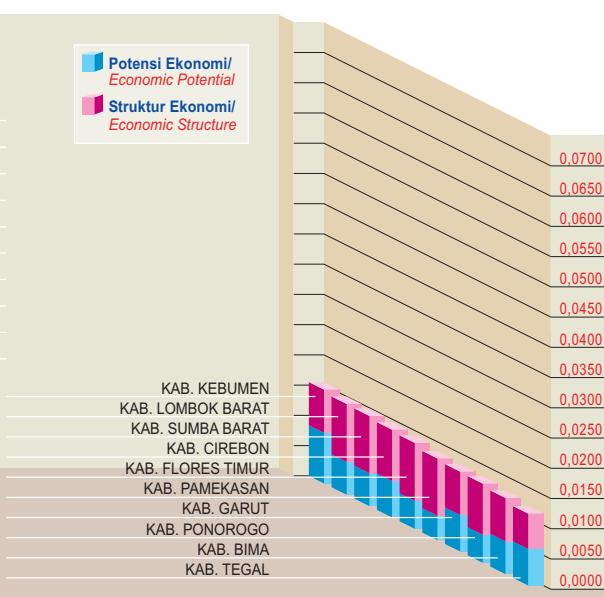

Secara rata-rata daerah-daerah yang masuk dalam kelompok 10 peringkat teratas ini merupakan daerah yang makmur dengan pendapatan perkapita sangat tinggi (rata-rata diatas Rp.12.000.000,-). Selain pendapatan perkapita yang sangat tinggi, pertumbuhan ekonomi di daerah ini juga sangat tinggi yakni di atas 5%. Untuk indikator Indeks Pembangunan Manusia (IPM), hampir semua daerah tersebut sangat tinggi, yaitu diatas 68,5 lebih tinggi dibandingkan dengan IPM secara Nasional yang hanya sebesar 65,8. Diantara 11 kabupaten

The 11 districts in the top ten ranks are among the richest in the country, as indicated by their high per capita incomes (generally above Rp 12 million per year). Economic growth in these regions is also at the high end of the scale, averaging above 5% in 2001. Most of them (nine out of 11) perform well in the Human Development Index (HDI) indicator, thanks to their above-average HDI scores. While the nationwide HDI score averages 65.8, these nine districts all have scores above 68.5. The two top-ten ranked districts that get low HDI

tersebut ada dua kabupaten yang nilai IPMnya rendah yakni Kab. Tabalong (peringkat ke-9) sebesar 63,60, dan Kab. Indramayu (peringkat ke-8), yang memiliki indikator IPM tergolong sangat rendah yakni sebesar 61,30. Rendahnya nilai IPM Kab. Indramayu dan Kab. Tabalong, tertutup oleh indikator Nilai Tambah Sektor Primer yang sangat tinggi, sehingga kedua daerah ini masih termasuk dalam kelompok 10 daerah peringkat atas berdasarkan faktor Ekonomi Daerah.

Peringkat pertama untuk kategori Ekonomi Daerah diperoleh Kab. Asahan dan Kab. Labuhan Batu secara bersama-sama dengan score 0,0635. Score variabel Potensi Ekonomi yang diperoleh Kab. Asahan dan Labuhan Batu, sama dengan 6 daerah lainnya pada kelompok peringkat atas ini. Yang membuat mereka lebih unggul dibandingkan dengan daerah lainnya adalah karena kedua daerah ini mempunyai proporsi yang seimbang antara indikator Nilai Tambah Sektor Primer dan Sekunder. Kelemahan dari dua daerah ini terletak pada indikator Nilai Tambah Sektor Tersier yang tergolong sangat rendah.

Daerah-daerah yang berada pada peringkat bawah, memiliki nilai rata-rata indikator Ekonomi Daerah rendah, terutama untuk indikator-indikator dalam variabel Potensi Ekonomi. Namun demikian jika dilihat per indikator beberapa daerah masih memiliki paling tidak satu indikator yang tergolong baik. Kab. Kebumen pada peringkat ke-105, memiliki indikator IPM yang cukup tinggi yakni sebesar 64,90. Sementara Kab. Sumba Barat (ke-107) dan Kab. Pamekasan (110), memiliki keunggulan untuk indikator Nilai Tambah Sektor Primer yang tergolong tinggi. Sayangnya kelebihan-kelebihan indikator yang dimiliki oleh daerah-daerah tersebut tidak didukung dengan tingginya nilai indikator lainnya, terutama indikator PDRB Perkapita dan Pertumbuhan PDRB yang memiliki bobot yang paling besar. Akibatnya daerah-daerah tadi tetap berada di peringkat bawah berdasarkan Faktor Ekonomi Daerah. Kelebihan indikator Nilai Tambah Sektor Primer yang dimiliki oleh Kab. Pamekasan dan Sumba Barat dapat dijadikan modal untuk menarik investor berinvestasi di sektor primer seperti, peternakan, atau perkebunan. Peringkat 156 Kabupaten Berdasarkan Faktor Ekonomi Daerah dapat dilihat pada Lampiran 1.1.2; Lampiran 1.1.5; dan untuk Score masing-masing Faktor, Variabel, dan Indikator dapat dilihat pada Lampiran 4.6.1.3.

scores are Tabalong (ranked ninth), at 63.60, and Indramayu (eighth), with just 61.30. Their top-ranking scores for the Primary Sector Added Value indicator nonetheless compensate for their low HDI indicator performance, and ensure that both districts rank in the top ten for the Regional Economic Dynamism factor.

Asahan and Labuhan Batu Districts tie for the top ranking in this factor, with a score of 0.0635 and identical marks for all six indicators. These two districts share the leading score for the Economic Potential variable with the six regions that rank directly below them. The two districts' top placement is attributable to their second-ranking scores for the Primary Sector Added Value indicator and their leading scores for the Secondary Sector Added Value indicator. Their weakness lies in the Tertiary Sector Added Value indicator, where they take the lowest rating.

While many of the lowest-ranked districts have poor indicator scores across the board, there are some instances where a district does disproportionately well in one or more indicator. Kebumen District, which is in 105<sup>th</sup> place for the factor as a whole, gains the second-highest score for the HDI indicator. Sumba Barat (ranked 107<sup>th</sup>) and Pamekasan (at number 110), meanwhile, share the top Primary Sector Added Value indicator rating with several other districts. Unfortunately, these three districts are unable to match these superior ratings with high scores for other indicators, including the heavily-weighted GRDP Per Capita and GRDP Growth. Consequently, they remain near the bottom of the rankings table for the Regional Economic Dynamism Factor. However, Pamekasan and Sumba Barat should be able to make use of their superior Primary Sector Added Value indicators to attract investors in primary-sector fields such as animal husbandry and plantations. (See appendix 1.1.5. Ranking of Investment Attractiveness of Regional Economic Dynamism Factor of 156 Districts, appendix 1.1.2. Strength and Weaknesses of 156 Districts by Factors and Variables, and appendix 4.6.1.3. Score of Factor, Variable and Indicator of Regional Economic Dynamism Factor of 156 Districts)

#### A.4.2. Peringkat Kota Berdasarkan Faktor Ekonomi Daerah

Faktor Ekonomi Daerah yang sebagian indikatornya merupakan anugerah alam, menghasilkan 35 urutan dari 44 Kota yang diperingkat karena ada 9 (sembilan) peringkat yang diisi oleh masing-masing 2 (dua) kota dengan nilai sama. Kota Cirebon yang merupakan daerah perbatasan Jawa Barat dan Jawa Tengah serta berada di jalur strategis perlintasan antar daerah di pantai utara Jawa menempati peringkat pertama dengan score 0,0676. Peringkat selanjutnya diisi secara berurutan oleh Kota Bitung (score 0,0669), Kota Balikpapan (score 0,0652), Kota Batam (score 0,0637), dan Kota Kediri (score 0,0630). Diantara kelima daerah tersebut hampir tidak ada perbedaan yang signifikan dalam hal variabel Potensi Ekonomi yang diukur berdasarkan indikator PDRB Perkapita, Pertumbuhan Ekonomi dan IPM (Indeks Pembangunan Manusia); dimana Kota Cirebon, Balikpapan, Batam mempunyai score sama (0,0555), sedangkan Bitung dan Kediri sama score 0,0548.

#### A.4.2. Ranking of Municipalities Based on The Regional Economic Dynamism Factor

The Regional Economic Dynamism factor produces 35 ranks for the 44 rated municipalities, as there are nine instances where a position is shared by two municipalities with the same scores. Cirebon, which is located on the border between Java Barat and Java Tengah, on the inter-regional strategic line that runs along the North coast of Java, takes first place with a score of 0.0676. Bitung is at number two with 0.0669, followed by Balikpapan (0.0652), Batam (0.0637), and Cilegon and Kediri (both 0.0630). The six municipalities in the top five ranks all have similar ratings for the Economic Potential variable, which consists of the GRDP Per Capita, Economic Growth and HDI indicators. For this variable as a whole, Cirebon, Balikpapan and Batam receive the same score (0.0555), while Bitung, Cilegon and Kediri get 0.0548.

### Grafik/Chart IV.8 Peringkat Kota Berdasarkan Faktor Ekonomi Daerah/ Rating of Municipalities Based on Regional Economic Dynamism

Grafik/Chart IV.8a  
Peringkat 5 Teratas Kota  
Berdasarkan Faktor Ekonomi Daerah  
The Highest Five Municipalities  
Based on Regional Economic Dynamism

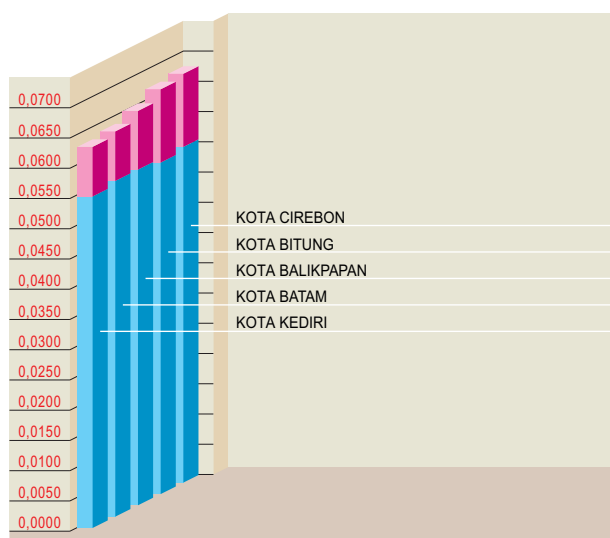

Grafik/Chart IV.8b  
Peringkat 5 Terbawah Kota  
Berdasarkan Faktor Ekonomi Daerah  
The Lowest Five Municipalities  
Based on Regional Economic Dynamism

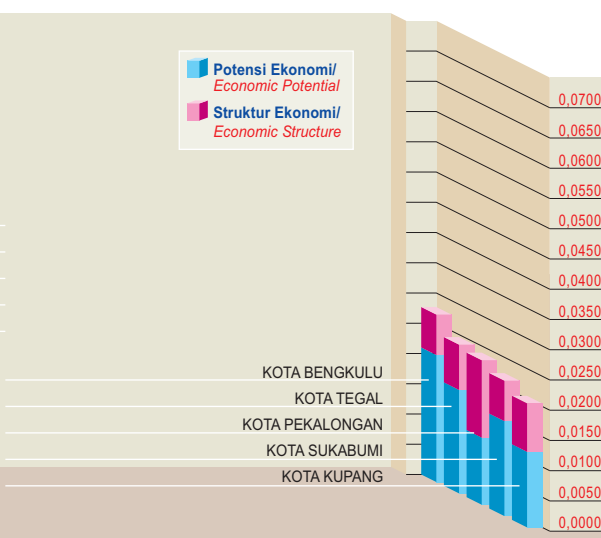

Demikian juga halnya dengan variabel Struktur Ekonomi yang dinilai dari indikator Nilai Tambah Primer, Sekunder, dan Tersier, tidak terdapat perbedaan mencolok, bahkan untuk Kota Cirebon, dan Bitung sama score-nya 0,0121;

For the Economic Structure variable, which is made up of the Primary Sector Added Value, Secondary Sector Added Value and Tertiary Sector Added Value indicators, Cirebon and Bitung both score 0.0121, while three of the other four

perbedaan score dengan 3 (tiga) kota lainnya pun sangat kecil, hampir tidak berarti. Yang penting diperhatikan disini adalah adanya pembobotan pada variabel Struktur Ekonomi yang ‘menguntungkan’ kota yang mempunyai keunggulan di sektor Primer karena bobotnya yang lebih besar dibanding Nilai Tambah Sektor Sekunder dan Tersier. Hal ini menjadi catatan penelitian tentang adanya ‘kelemahan’ hasil pembobotan, yang berdasarkan pemahaman umum ‘seharusnya’ bobot indikator-indikatornya secara berurutan dari bobot besar adalah indikator Nilai Tambah Tersier, diikuti Nilai Tambah Sekunder, dan terakhir Nilai Tambah Primer untuk konteks daerah Perkotaan.

Peringkat terbawah kategori ini adalah Kota Kupang propinsi Nusa Tenggara Timur, suatu kawasan Indonesia bagian Timur yang relatif tertinggal dibandingkan daerah-daerah lainnya di Indonesia bagian Barat. Score terendah Kota Kupang tersebut adalah 0,0205, diikuti Kota Sukabumi (0,0224), Kota Pekalongan (0,0239), Kota Tegal (0,0246), dan Kota Bengkulu (0,0277). Pertumbuhan Ekonomi yang sangat rendah di Kota Kupang dan Kota Sukabumi, serta score rendah di indikator-indikator lainnya seperti PDRB Perkapita dan IPM di 5 (lima) kota di atas, menyebabkan daerah-daerah ini berada di 5 (lima) peringkat terbawah, jauh lebih rendah dibanding daerah-daerah lainnya. Peringkat 44 Kota Berdasarkan Faktor Ekonomi Daerah dapat dilihat pada Lampiran 1.2.2; Lampiran 1.2.5; dan untuk Score masing-masing Faktor, Variabel, dan Indikator dapat dilihat pada Lampiran 4.6.2.3.

#### A.5. Faktor Tenaga Kerja dan Produktivitas

Peringkat daya tarik investasi daerah berdasarkan faktor Tenaga Kerja & Produktivitas, terbentuk dari 3 variabel yakni variabel Produktivitas TK, Biaya Tenaga Kerja (Biaya TK), dan Ketersediaan TK. Bobot masing-masing variabel adalah 35% untuk variabel Ketersediaan TK, 24% untuk Produktivitas TK, dan 41% untuk Biaya TK (Lihat Diagram 6. dibawah)

Untuk pemeringkatan ini variabel Produktivitas TK juga berstatus sebagai indikator, sementara variabel Biaya TK terdiri dari dua indikator, yakni indikator Biaya TK sesuai aturan formal (UMP/UMK), dan indikator Biaya Tenaga Aktual yaitu upah total tenaga kerja yang berlaku dipasar tenaga kerja di suatu daerah yang dibayarkan oleh pemberi kerja. Sementara variabel Ketersediaan Tenaga Kerja terdiri dari 3 indikator yakni, indikator Pencari Kerja, Tenaga Kerja

municipalities share the same value (Batam, Cilegon and Kediri, all at 0.0082). The most important thing to note here is that the weightings within the Economic Structure variable favor regions (including cities) with strong primary industry sectors, with the Primary Sector Added Value indicator given a heavier weighting than the corresponding indicators for the secondary and tertiary sectors. This is noted in the research as a “weakness” of weighting, in that it runs counter to the general understanding that for urban areas, the tertiary sector is the most important, followed by the secondary and primary sectors. It is, however, a reflection of the state of industrial development in Indonesia as a whole.

For the Regional Economic Dynamism factor, the lowest rank is held by Kupang Municipality in Nusa Tenggara Timur Province, a territory in Eastern Indonesia that is generally less well developed than the rest of the country. Kupang gains a score of 0.0205, and is preceded by Sukabumi (at 0.0224), Pekalongan (0.0239), Tegal (0.0246), and Pare-Pare and Bengkulu (both 0.0277). Low economic growth in Kupang and Sukabumi, in combination with poor scores for other indicators such as GRDP Per Capita and HDI in these six municipalities put them in the lowest five ranks. See appendix 1.2.5. Ranking of Investment Attractiveness of Regional Economic Dynamism Factor of 44 Municipalities, appendix 1.2.2. Strength and Weaknesses of 44 Municipalities by Factors and Variables, and appendix 4.6.2.3. Score of Factor, Variable and Indicator of Regional Economic Dynamism Factor of 44 Municipalities)

#### A.5. The Labor & Productivity Factor

The regional investment attractiveness rating based on the Labor & Productivity factor is formed from three variables: Productivity (which has the highest weighting, at 41%), Availability of Manpower (35%) and Labor Cost (24%) (see diagram 6: Weight of Indicators and Variables in the Labor and Productivity factor).

The Productivity variable consists of a single indicator, while the Labor Cost variable comprises two indicators, namely Normative Wages – which takes account of the government-sanctioned Provincial Normative Wages/Municipal Normative Wages (UMP/UMK) – and Actual Wages, which are the real wages paid by employers in the region in question. The Availability of Manpower variable is made up of three indicators, namely Job Seekers, Productive

Berpengalaman berdasarkan Pendidikan Minimal SLTP, dan indikator Tenaga Kerja Usia Produktif. Untuk pemeringkatan ini variabel dan indikator Produktivitas Tenaga Kerja merupakan variabel dengan bobot terbesar yang akan banyak menentukan peringkat daya tarik investasi daerah berdasarkan Faktor Tenaga Kerja & Produktivitas.

Age and Skilled Labor (who are educated to at least Junior High School, or SLTP, level).

Diagram/Figure 6.  
Faktor Tenaga Kerja dan Produktivitas/Labor & Productivity

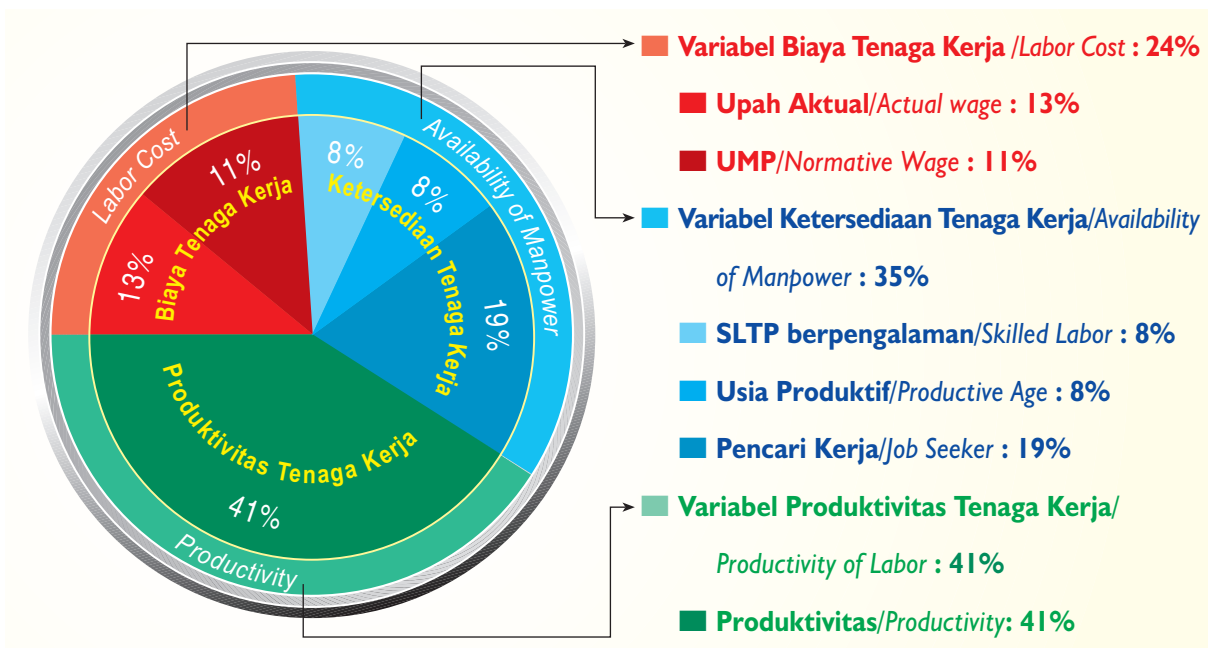

#### A.5.1. Peringkat Kabupaten Berdasarkan Faktor Tenaga Kerja dan Produktivitas.

Berdasarkan Faktor Tenaga Kerja dan Produktivitas diperoleh 117 peringkat dari 156 daerah yang diperingkat. Daerah yang berada pada kelompok 10 Kabupaten Peringkat teratas berdasarkan faktor Tenaga Kerja dan Produktivitas, disebabkan karena rata-rata 6 indikatornya baik. Kontribusi terbesar dari peringkat Kabupaten berdasarkan faktor Tenaga Kerja dan Produktivitas ini adalah indikator Produktivitas Tenaga Kerja yang mempunyai bobot paling besar diantara 6 indikator Tenaga Kerja dan Produktivitas lainnya, yaitu sebesar 41%.

Dari Kabupaten yang termasuk dalam kelompok 10 peringkat teratas, seluruhnya memiliki indikator produktivitas tenaga kerja sangat baik (Grafik IV.9). Di daerah-daerah tersebut biasanya telah berkembang dengan baik kegiatan industri pengolahan dan struktur ekonominya sebagian besar ditopang oleh sektor sekunder. Banyaknya tenaga kerja yang bekerja di sektor industri mendorong produktivitas tenaga kerja di

#### A.5.1. Ranking of District Based on The Labor & Productivity Factor

When rated for the Labor & Productivity Factor, the 156 districts form 117 ranks. All of the top ten districts gain very good scores for the Productivity indicator (Graph IV.9), which, at 41%, is the most significant of the six indicators that make up this factor. These highly rated regions tend to host well-developed manufacturing activities, and to feature an economic structure that is underpinned by the secondary sector. The fact that many people are employed in the industrial sector translates into comparatively high productivity levels in these areas.

Pesisir Selatan, which takes first place for the Labor & Productivity factor, gets high ratings for every indicator except Productive Age. In other words, this district does not have enough people who are of working age. The number two-ranking Pangkajene & Kepulauan District, on the other hand, is handicapped by its relatively high actual wage cost, while it receives very high scores for all other indicators. In third place is Bekasi, where the



daerah tersebut secara umum lebih baik dibandingkan dengan daerah-daerah yang industrinya belum berkembang.

Kab. Pesisir Selatan yang berada pada peringkat pertama untuk faktor ketengakerjaan, secara rata-rata setiap indikatornya baik. Satu kelemahan dari Kab. Pesisir Selatan adalah kurangnya tersedianya tenaga kerja usia produktif. Sementara Kab. Pangkajene Kepulauan di peringkat dua memiliki kelemahan pada indikator upah tenaga kerja aktual yang relatif mahal. Di

high Municipal Normative Wage (UMK) puts it on a par with Bulungan (in seventh place) and Labuhan Batu (eighth) when it comes to the Normative Wages indicator. The latter two regions are also weak in terms of available labor reserves – whether job seekers or productive-age workers. Meanwhile, Kolaka (fourth), Sanggau (fifth), Solok (sixth) and Bangka (ninth) all receive unfavorable scores for the Availability of Manpower variable.

**Grafik/Chart IV.9**  
**Peringkat Kabupaten Berdasarkan Faktor Tenaga Kerja dan Produktivitas/**  
**Rating of Districts Based on Labor & Productivity**

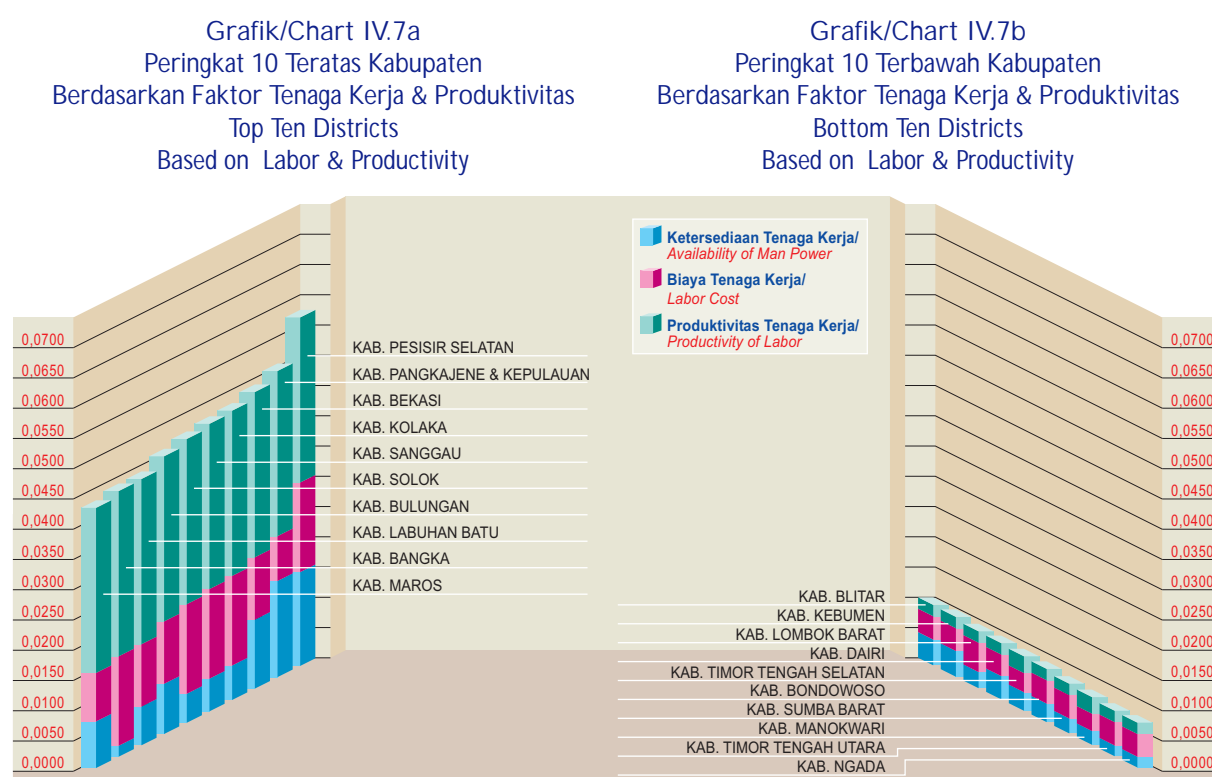

peringkat tiga Kab. Bekasi juga mempunyai kelemahan pada tingginya UMK, sama seperti pada Kab. Labuhan Batu (peringkat ke-7) dan Kab. Bulungan (peringkat ke-8). Dua daerah terakhir ini juga mempunyai kelemahan pada kurang tersedianya jumlah tenaga kerja baik yang berupa pencari kerja maupun tenaga kerja usia produktif. Sementara untuk Kab. Kolaka (ke-4), Kab. Sanggau (ke-5), Kab. Solok (ke-6), dan Kab. Bangka (ke-9) memiliki kelemahan pada variabel ketersediaan tenaga kerja yang dinilai kurang cukup memadai.

Daerah-daerah yang berada pada kelompok Kabupaten peringkat bawah, secara rata-rata 6 indikator Tenaga Kerja dan Produktivitasnya rendah, terutama untuk indikator produktivitas tenaga kerja. Pada kelompok 10 Kabupaten yang

In general, the lowest-ranked districts gain poor scores for all six Labor & Productivity indicators, and particularly for the weighty Productivity indicator. Six of the bottom ten districts are located in Eastern Indonesia. The lowest rank (number 117) is occupied by Ngada District in Nusa Tenggara Timur Province. In 116<sup>th</sup> place is Timor Tengah Utara, followed in ascending order by Manokwari, Sumba Barat and Bondowoso.

The high concentration of districts in Eastern Indonesia in the lower ranks indicates that the development of human resources in this part of the country remains comparatively poor. Another phenomenon that is apparent in the scores gained for the Labor & Productivity indicators is

berada di peringkat bawah berdasarkan faktor Tenaga Kerja dan Produktivitas, enam diantaranya adalah kabupaten-kabupaten yang berada di Kawasan Indonesia Timur. Peringkat paling bawah (peringkat ke-117) diduduki oleh Kab. Ngada di Propinsi Nusa Tenggara Timur, diatasnya berturut-turut Kab. Timor Tengah Utara (ke-116), kab. Manokwari (115), Kab. Sumba Barat (ke-114) dan seterusnya.

Banyaknya daerah-daerah di Kawasan Indonesia Timur berada di peringkat bawah dapat dijadikan salah satu indikasi bahwa dilihat dari faktor Sumber Daya Manusia, di kawasan tersebut masih tertinggal dibandingkan daerah lainnya. Fenomena lain yang tertangkap dari faktor Tenagakerja ini, jika dilihat dari struktur ekonominya, di daerah-daerah tersebut belum menunjukkan adanya perkembangan yang baik pada kegiatan usaha sektor industri pengolahan dan sektor sekunder lainnya. Kurang berkembangnya sektor industri pengolahan di daerah-daerah tersebut mengakibatkan tidak banyak tenaga kerja yang terlatih, karena sektor industri di daerah ini belum mampu menstimulir produktivitas tenaga kerja yang ada. Kekurangan tenaga kerja di daerah ini barangkali disebabkan tenaga kerja di daerah tersebut melakukan migrasi ke daerah-daerah lain dimana industrialisasi telah berkembang lebih maju. Peringkat 156 Kabupaten Berdasarkan Faktor Tenaga Kerja & Produktivitas dapat dilihat pada Lampiran 1.1.2; Lampiran 1.1.6; dan untuk Score masing-masing Faktor, Variabel, dan Indikator dapat dilihat pada Lampiran 4.6.1.4.

#### A.5.2. Peringkat Kota Berdasarkan Faktor Tenaga Kerja dan Produktivitas

Penilaian dari faktor Tenaga Kerja & Produktivitas berdasarkan 3 (tiga) variabel yaitu Ketersediaan Tenaga Kerja, Biaya Tenaga Kerja, dan Produktivitas Tenaga Kerja yang terjabarkan dalam 6 (enam) indikator. Dari penilaian faktor ini dihasilkan 40 peringkat dengan 3 (tiga) peringkat diantaranya masing-masing diisi 2 (dua) kota dengan nilai sama. Peringkat tertinggi dicapai Kota Kediri dengan score 0,0555 disusul secara berurutan Kota Cirebon (0,0554), Kota Palembang (0,0517), Kota Balikpapan (0,0472), dan Kota Cilegon (0,0465).

Dalam hal Produktivitas Tenaga Kerja tidak ada perbedaan score antara kelima kota tersebut. Kota Kediri dapat menduduki peringkat teratas karena keunggulannya di Biaya Tenaga Kerja, baik dari indikator Biaya Normatif UMP/K (Upah Minimum Propinsi/Kota) maupun Upah Riil Yang

that, bearing in mind their respective economic structures, these regions are not making any progress in managing the industrial sector and other secondary sectors. The fact that the manufacturing sector remains underdeveloped in these regions explains why the availability of skilled workers is limited. Firstly, the scarcity of skilled industrial jobs has meant that few people have been given the incentive to acquire the skills necessary for this type of position and, secondly, many of the people who could fill these jobs have migrated to other regions where the industrial sector is more advanced. See appendix 1.1.6. Ranking of Investment Attractiveness of Labor and Productivity Factor of 156 Districts, appendix 1.1.2. Strength and Weaknesses of 156 Districts by Factors and Variables, and appendix 4.6.1.4. Score of Factor, Variable and Indicator of Labor and Productivity Factor of 156 Districts)

#### A.5.2. Ranking of Municipalities Based on The Labor & Productivity Factor

The 44 municipalities surveyed form 40 ranks for this factor; three ranks are occupied by two municipalities each. Kediri holds the highest position, with a score of 0.0555, and is closely followed by Cirebon (0.0554), and Palembang (0.0517), Balikpapan (0.0472), and Cilegon (0.0465).

The top five municipalities all have the same high scores for the Productivity variable (which is also a single indicator). Kediri is in the top position because of its competitive Labor Cost – it receives high marks for both the Normative Wage indicator and the Real Wage indicator. Nonetheless, Cirebon



Diterima Pekerja. Sedangkan Kota Cilegon dan Balikpapan sebenarnya mempunyai peluang di peringkat teratas karena variabel Ketersediaan Tenaga Kerjanya lebih baik dibanding Kota Kediri namun karena Biaya Tenaga Kerja yang jauh lebih tinggi dibandingkan Kediri, menjadikan daerah-daerah tersebut berada di peringkat di bawah Kediri.

and Palembang gain higher ratings than Kediri for the Availability of Manpower variable.

**Grafik/Chart IV.10**  
**Peringkat Kota Berdasarkan Faktor Tenaga Kerja dan Produktivitas/**  
**Rating of Municipalities Based on Labor & Productivity**

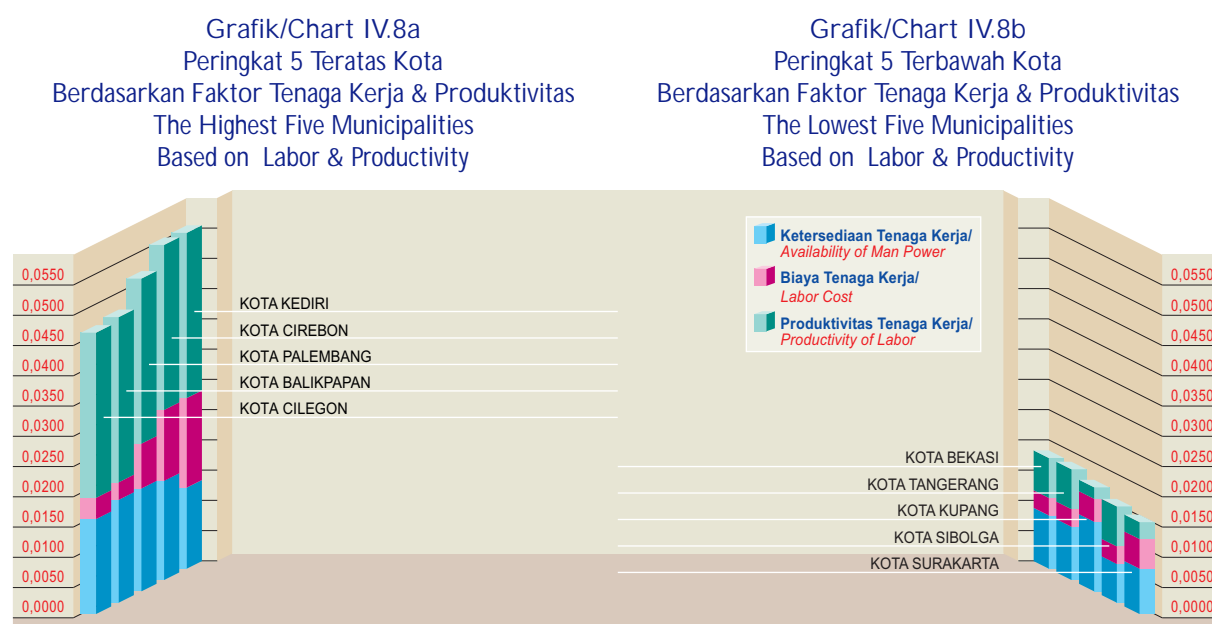

Kota Surakarta di Propinsi Jawa Tengah berada pada peringkat terendah dari 44 Kota dengan score 0,0152; diikuti secara berurutan ke atas Kota Sibolga (0,0159), Kota Kupang (0,0172), Kota Tangerang (0,0189), dan Kota Bekasi (0,0183). Score kelima daerah ini sangat jauh dibawah score kota lima kelompok peringkat teratas. Dari lampiran score seluruh indikator, bisa dilihat bahwa secara keseluruhan score masing-masing indikator sangat tidak mendukung daerah-daerah ini untuk menduduki peringkat yang lebih baik. Peringkat 44 Kota Berdasarkan Faktor Tenaga Kerja & Produktivitas dapat dilihat pada Lampiran 1.2.2; Lampiran 1.2.6; dan untuk Score masing-masing Faktor, Variabel, dan Indikator dapat dilihat pada Lampiran 4.6.2.4.

Surakarta Municipality in Java Tengah Province is in 40<sup>th</sup> and last place with a score of 0.0152, and is preceded by Sibolga (0.0159), Kupang (0.0172), Bekasi (0.0183) and Tangerang (0.0189). In the attachment showing the scores for all indicators, we can see that these low-ranking municipalities generally perform poorly across the board. (See appendix 1.2.6. Ranking of Investment Attractiveness of Labor and Productivity Factor of 44 Municipalities, appendix 1.1.2. Strength and Weaknesses of 44 Municipalities by Factors and Variables, and appendix 4.6.2.4. Score of Factor, Variable and Indicator of Labor and Productivity Factor of 44 Municipalities)

#### A.6. Faktor Infrastruktur Fisik

Faktor Infrastruktur Fisik terbentuk dari 10 indikator, yang dapat dikelompokkan dalam dua variabel yaitu, variabel Ketersediaan Infrastruktur Fisik dan variabel Kualitas Infrastruktur Fisik. Vriable Ketersediaan Infrastruktur Fisik dan

#### A.6. The Physical Infrastructure

The Physical Infrastructure Factor is composed of 10 indicators that are arranged under two variables, namely Availability of Physical Infrastructure (at 54%) and Quality of Physical Infrastructure (46%). The weightiest indicator is

Kualitas Infrastruktur Fisik mempunyai bobot yang hampir berimbang yakni 56% untuk Ketersediaan dan 44% untuk Kualitas. Sementara jika dilihat dari bobot masing-masing indikator, Kualitas Sambungan Telpon mempunyai bobot paling besar yakni sebesar 15%, disusul Ketersediaan Listrik 14%, Ketersediaan Jaringan Telon 13%, Ketersediaan Jalan Darat, Ketersediaan/Akses ke Pelabuhan Laut, dan Kualitas Sambungan Listrik masing-masing 11%, Kualitas Jalan, Kualitas Pelabuhan Laut masing-masing 7%, dan bobot terkecil adalah Kualitas Pelabuhan Udara 6%, dan Ketersediaan/Akses ke Pelabuhan Udara 5% (Lihat Diagram 7. dibawah ini)

Hasil pembobotan tersebut dapat mencerminkan bawah saat ini, jaringan telpon masih menjadi persoalan bagi aktivitas usaha. Selisih bobot masing-masing indikator tidak terpaut jauh, menandakan bahwa antara indikator yang satu dengan lainnya mempunyai pengaruh yang relatif sama dalam menentukan daya tarik investasi daerah. Hal ini juga mencerminkan bahwa hasil pembobotan untuk faktor Infrastruktur Fisik ini dapat berlaku secara umum untuk berbagai bidang usaha yang mempunyai karakter yang berlainan.

Quality of Telephone, with 15%. It is followed by Availability of Electricity (at 14%), Availability of Telephone (13%), Availability/Accessibility of Roads, Availability/Accessibility of Seaport, and Quality of Electricity (11% each), Quality of Roads and Quality of Seaport (7% each), Quality of Airport (6%), and Availability/Accessibility of Airport (5%). (see diagram 7: Weight of Indicators and Variables in the Physical Infrastructure Productivity factor). It is apparent from these weightings that the telephone network is still a major concern for business operators. The fact there are a relatively large number of indicators, and that no single indicator dominates the weightings, implies that the same level of investment attractiveness can be produced by a number of different indicator score combinations.

Diagram/Figure 7.  
Faktor Infrastruktur Fisik/Physical Infrastructure

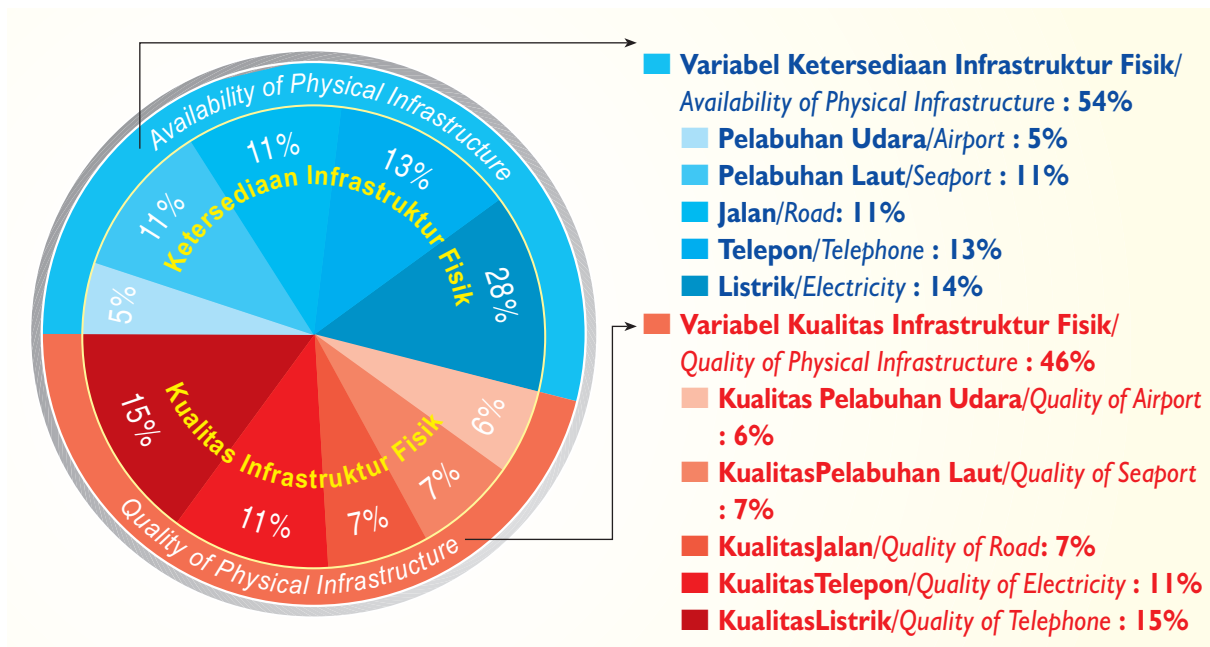

#### A.6.1. Peringkat Kabupaten Berdasarkan Faktor Infrastruktur Fisik

Untuk peringkat Kabupaten Berdasarkan Faktor Infrastruktur Fisik diperoleh 124 peringkat. Berada pada peringkat pertama adalah Kab. Gresik

#### A.6.1. Ranking of District Based on The Physical Infrastructure

The 156 districts are arranged into 124 ranks based on the Physical Infrastructure factor. Gresik District in Java Timur Province leads the field, while

di Propinsi Jawa Timur, sementara peringkat terbawah (ke-124) diduduki oleh Kab. Kutai Timur, di Propinsi Kalimantan Timur (Lihat Lampiran 1.1.7. Peringkat Kabupaten Berdasarkan Faktor Infrastruktur Fisik, dan Lampiran 1.1.2).

Grafik IV.11, memperlihatkan daerah-daerah yang menempati peringkat teratas dan terbawah berdasarkan Faktor Infrastruktur Fisik. Keberhasilan kabupaten yang menempati peringkat atas berdasarkan faktor Infrastruktur Fisik, karena daerah-daerah tersebut tersedia infrastruktur secara lengkap atau paling tidak mempunyai kemudahan akses terhadap infrastruktur utama seperti pelabuhan laut, pelabuhan udara, disamping juga ditunjang oleh kualitas dari infrastruktur yang bersangkutan. Secara geografsis (geo-ekonomis) daerah-daerah yang berada pada peringkat atas untuk faktor Infrastruktur Fisik, berada di sekitar pusat pertumbuhan ekonomi atau sebagai daerah penyangga kota-kota besar.

Kab. Gresik berhasil menempati peringkat pertama, karena infrastruktur yang ada tersedia secara lengkap dengan kualitas baik (antara ketersediaan dan kualitasnya seimbang). Kab. Gresik merupakan daerah penyangga bagi Kota Surabaya. Hal yang sama juga terjadi pada Kab. Bekasi di peringkat ke-2 dan Kab. Tangerang di peringkat ke-8, yang berbatasan langsung dan merupakan daerah penyangga Kota Jakarta, atau Kab. Gianyar (peringkat ke-3), yang juga berbatasan langsung dengan Kota Denpasar.

Pusat-pusat pertumbuhan ekonomi, yang telah memiliki infrastruktur secara lengkap dan kualitasnya juga baik, mendatangkan efek aglomerasi (*agglomeration effect*) bagi daerah-daerah di sekitarnya. Dengan demikian daerah-daerah di sekitar pusat pertumbuhan ekonomi tersebut dapat memperoleh *share* infrastruktur yang ada di daerah pusat pertumbuhan ekonomi. Selain daerah berada di dekat pusat pertumbuhan, daerah yang berada pada jalur distribusi juga dapat mencapai peringkat yang baik untuk infrastruktur fisik. Hal ini terlihat dari peringkat ke-4 berdasarkan faktor Infrastruktur Fisik, yakni Kab. Tegal, yang secara geografsis terletak di jalur pantura yang merupakan jalur distribusi/perdagangan utama di Pulau Jawa. Kabupaten ini juga berada di antara kota Jakarta dan Kota Semarang dua buah kota besar yang merupakan pusat pertumbuhan ekonomi di Indonesia.. Keberhasilan Kab. Tegal ini barangkali juga disebabkan pmdanya mempunyai cukup komitmen dalam melakukan pembangunan

Kutai Timur in Kalimantan Timur Province brings up the rear at number 124. (See attachment 1.1.7. Ranking of 156 Districts based on Physical Infrastructure Factor, and appendix 1.1.2. Strength and Weaknesses of 156 Districts by Factors and Variables).

Graph IV.11 shows the top ten and bottom ten districts for the Physical Infrastructure Factor. The districts at the top end of the ranking are in these positions because they possess a relatively high level of infrastructure, or because their main infrastructure facilities such as seaports and airports are highly accessible, and are of good quality. In geographical and geo-economic terms, the top-rated districts are those that are located in economic growth centers, or serve as support zones to large urban areas.

Gresik is ranked first because it has the entire necessary infrastructure, which is of good quality (there is a proper balance between availability and quality). Gresik acts as a buffer region to Surabaya Municipality. The same conditions apply to Bekasi (which is in second place) and Tangerang (in eighth place), both of which directly border Jakarta and serve as buffer regions to the capital. They are also valid for Gianyar (third), which has a similar relationship with Denpasar.

The centers of economic growth, which have comprehensive, good-quality infrastructure facilities, exert a so-called agglomeration effect on the surrounding regions; this enables the border zones to benefit from the superior infrastructure of the economic growth centers they serve. It is not only districts that lie adjacent to economic growth centers that stand to gain in this way. The regions that are located along major distribution lines also get good ratings for the Physical Infrastructure factor. This can be seen from the case of Tegal (in fourth position), which is situated on the main distribution/trade line in Java. This district also benefits from its position between Jakarta and Semarang, two major municipalities that are among the largest centers of economic growth in Indonesia. Tegal's high rating is not solely attributable to geography, however. The local government there also appears to be committed to developing the physical infrastructure of the region, as reflected in its relatively high Development Budget-Regional Budget Ratio

infrastruktur fisik. Hal ini terlihat dari besarnya rasio antara anggaran pembangunan dalam APBD-nya.

indicator (part of the Regulation & Government Service factor).

### Grafik/Chart IV.11 Peringkat Kabupaten Berdasarkan Faktor Infrastruktur Fisik/ Rating of Districts Based on Physical Infrastructure

Grafik/Chart IV.7a  
Peringkat 10 Teratas Kabupaten  
Berdasarkan Faktor Infrastruktur Fisik  
The Highest Ten Districts  
Based on Physical Infrastructure

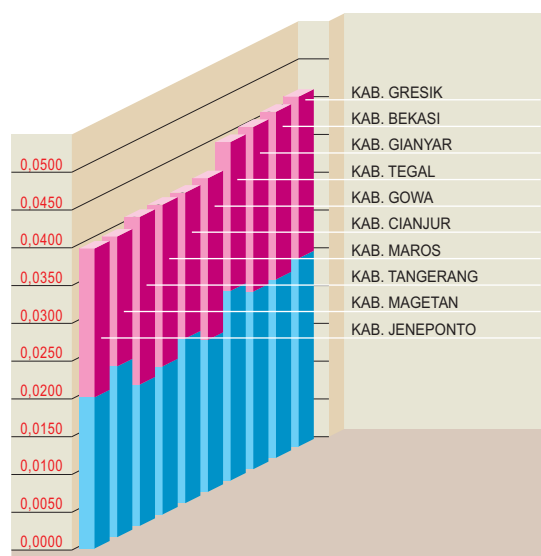

Grafik/Chart IV.7b  
Peringkat 10 Terbawah Kabupaten  
Berdasarkan Faktor Infrastruktur Fisik  
The Highest Ten Districts  
Based on Physical Infrastructure

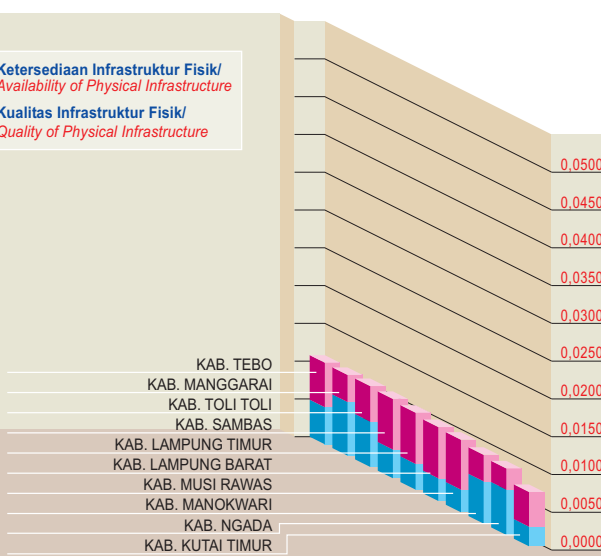

Sebaliknya kabupaten-kabupaten yang berada pada peringkat bawah berdasarkan faktor infrastruktur fisik, secara geo-ekonomis berada jauh dari pusat pertumbuhan ekonomi yang memiliki kelengkapan dan kualitas infrastruktur baik. Daerah-daerah yang berada di peringkat bawah berdasarkan faktor Infrastruktur Fisik ini biasanya cenderung terpencil, berada jauh dari pusat pertumbuhan ekonomi, dan tidak dilintasi oleh jalur distribusi/perdagangan antar daerah. Akibatnya daerah-daerah tersebut menjadi kurang berkembang. Kab. Lampung Timur (peringkat ke-119) dan Lampung Barat (peringkat ke-120), yang berada di Propinsi Lampung yang merupakan pintu gerbang jalur darat Pulau Sumatera dari Jawa, berada jauh dari jalan Lintas Sumatra yang merupakan jalur perdagangan utama Sumatera. Akibatnya kedua daerah ini dilihat dari infrastruktur fisiknya tertinggal dibandingkan dengan daerah-daerah lain di Propinsi Lampung, bahkan dari hasil pemeringkatan ini berada di peringkat bawah dari 156 Kabupaten di Indonesia. Hal yang sama juga dialami oleh Kab. Sambas peringkat ke-118, Musi Rawas (121), Ngada (123), Manokwari (122), Kutai Timur (124), dan daerah-

Conversely, the districts with the lowest rating for the Physical Infrastructure factor are geo-economically disadvantaged in that they are far away from centers of economic growth, where there is comprehensive, high-quality infrastructure. These regions are usually isolated and poorly developed, and located away from inter-regional distribution/trade lines. Lampung Timur (ranked number 119) and Lampung Barat (number 120), which are in Lampung Province, a province considered to be the gateway of the transportation line between the islands of Sumatra and Java, lie far from the main trade line in Sumatra. The physical infrastructure of these two districts is therefore inferior to that seen in the other regions in Lampung Province, and their ratings for this factor are among the lowest of the 156 districts. The same conditions apply to Sambas (at number 118), Musi Rawas (number 121), Manokwari (number 122), Ngada (number 123), Kutai Timur (number 124), and other regions that receive low scores for the Physical Infrastructure Factor. The advent of regional autonomy has, however, provided local governments the opportunity to cooperate with neighboring regions, and to allocate

daerah lainnya yang berada di peringkat bawah untuk Faktor Infrastruktur Fisik, secara geoekonomis merupakan daerah yang berada jauh dari pusat pertumbuhan ekonomi, dan secara geograferis tidak berada di jalur perdagangan utama antar daerah. Otonomi daerah memberikan peluang kepada pemda setempat untuk menjalin kerja sama dengan daerah sekitarnya serta untuk mengalokasikan lebih besar dana APBD untuk pembangunan infrastruktur fisik. Dengan demikian daerah-daerah ini dapat memperoleh akses yang lebih baik ke pusat pertumbuhan ekonomi, atau bahkan membentuk pusat pertumbuhan ekonomi baru. Peringkat 156 Kabupaten Berdasarkan Faktor Infrastruktur Fisik dapat dilihat pada Lampiran 1.1.2; Lampiran 1.1.7; dan untuk Score masing-masing Faktor, Variabel, dan Indikator dapat dilihat pada Lampiran 4.6.1.5.

more funds for physical infrastructure development. Thus, these regions will be able to gain better access to the centers of economic growth, or even to become new centers of economic growth (See appendix 4.6.1.5. Score of Factor, Variable and Indicator of Physical Infrastructure of 156 Districts)

#### A.6.2. Peringkat Kota Berdasarkan Faktor Infrastruktur Fisik

Dari 44 kota dihasilkan 42 peringkat karena ada 2 (dua) peringkat yang diisi oleh masing-masing 2 (dua) kota dengan nilai sama. Urutan 42 peringkat tersebut dihasilkan dari penilaian 10 (sepuluh) indikator yang dikelompokkan dalam variabel Ketersediaan Infrastruktur Fisik dan Kualitas Infrastruktur Fisik. Peringkat pertama diraih DKI Jakarta dengan score 0,0484, diikuti Kota Surabaya (0,0480), Kota Bogor (0,0446), Kota

#### A.6.2. Ranking of Municipalities Based on The Physical Infrastructure

For this factor, there are 42 ranks encompassing 44 municipalities; there are two pairs of municipalities with the same total values. The rankings are tabulated from the scores gained for the ten indicators grouped under the Availability of Physical Infrastructure and Quality of Physical Infrastructure variables. The leading municipality for this factor is the Special Capital Region of Jakarta, with a score of 0.0484, followed by Surabaya (0.0480), Bogor (0.0446),

#### Grafik/Chart IV.12

#### Peringkat Kota Berdasarkan Faktor Infrastruktur Fisik/ Rating of Municipalities Based on Physical Infrastructure

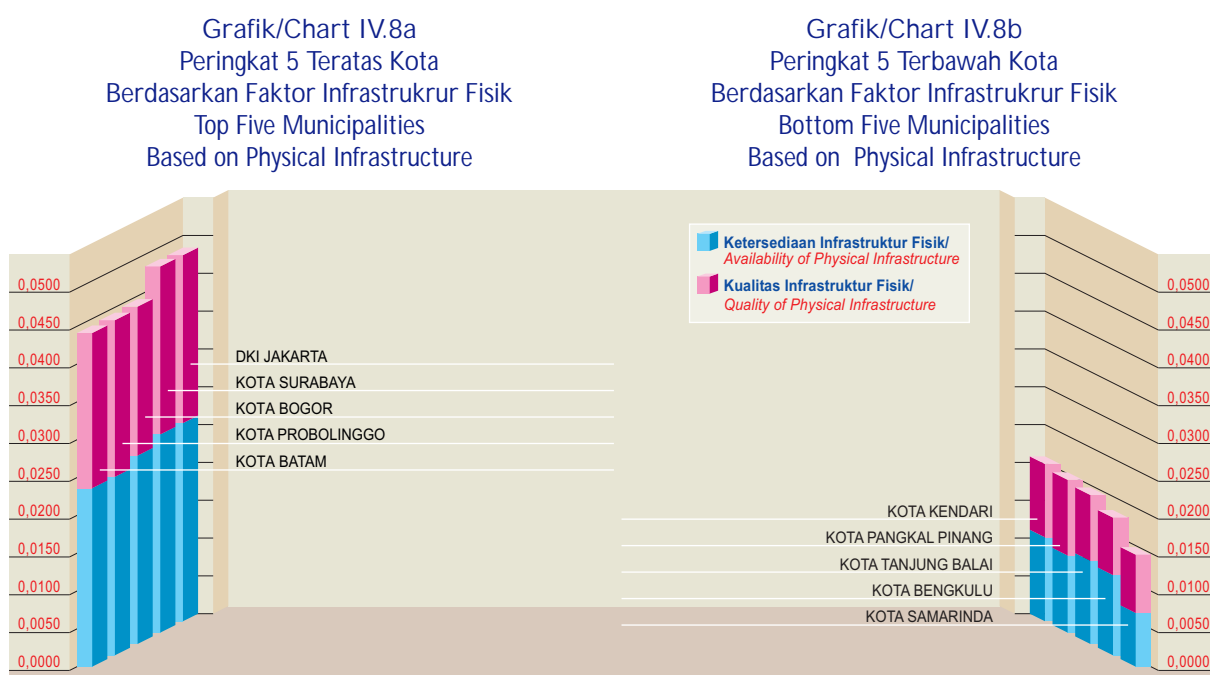

Probolinggo (0,0443), dan Kota Batam (0,0441).

Dari kelima kota tersebut hampir tidak ada perbedaan yang berarti dalam hal ketersediaan maupun kualitas infrastruktur Jalan, Pelabuhan Laut, Pelabuhan Udara, Telepon dan Listrik. Score sedikit lebih baik DKI dalam hal Pelabuhan Udara dibandingkan Kota Surabaya dan kota-kota lainnya, menempatkan DKI Jakarta dalam peringkat tertinggi kategori ini. Namun patut mendapat perhatian DKI Jakarta tentang kemacetan lalu lintas yang parah hampir di semua ruas jalan utama – yang tidak dinilai dalam pemeringkatan ini – mesti dibenahi dengan perbaikan yang mendasar sehingga kelak tidak akan mengakibatkan hambatan bagi masuknya investasi.

Urutan 5 (lima) kota peringkat terbawah tidak satupun diduduki kota di Pulau Jawa yang memang diuntungkan selama ini oleh proses pembangunan. Kota Samarinda di Kalimantan Timur menempati urutan terbawah dalam kategori ini dengan score 0,0148, disusul berurutan ke atas Kota Bengkulu (0,0182), Kota Tanjung Balai (0,0197), Kota Pangkal Pinang (0,0202), dan Kota Kendari (0,0208). Faktor Ketersediaan Jalan untuk transportasi darat masih menjadi kendala serius bagi Kota Samarinda untuk menarik minat investor menanamkan modalnya di kota ini, demikian juga kurangnya Ketersediaan Telepon dan Listrik; hal yang hampir sama dialami Kota Bengkulu.

Dari perbedaan score yang mencolok antara 5 (lima) peringkat teratas dan terbawah semakin menegaskan adanya perbedaan perhatian pembangunan selama ini, karena pada dasarnya indikator-indikator dalam faktor Infrastruktur Fisik ini merupakan “anugerah” preferensi kekuasaan selama orde baru dalam kebijakan pembangunannya. Peringkat 44 Kota Berdasarkan Faktor Infrastruktur Fisik dapat dilihat pada Lampiran 1.2.2; Lampiran 1.2.7; dan untuk Score masing-masing Faktor, Variabel, dan Indikator dapat dilihat pada Lampiran 4.6.2.5.

## B. Perubahan Peringkat 2002 - 2003

Faktor, Variabel, dan Indikator yang digunakan untuk pemeringkatan tahun 2003 sama dengan yang digunakan untuk pemeringkatan tahun 2002. Bobot masing-masing indikator, variabel, maupun faktornya juga tetap dipertahankan, dimaksudkan agar dapat diperbandingkan hasil pemeringkatan dari dua tahun ini. Perubahan yang dilakukan hanyalah

Probolinggo (0.0443) and Batam (0.0441).

There are no significant differences among these five municipalities in terms of their scores for either the availability or the quality of Road Infrastructure, Seaports, Airports, Telephone and Electricity. The Special Capital Region of Jakarta gains the same scores as Surabaya in all indicators apart from Quality of Airport, thus placing it in the top position. However, Jakarta must take action to rectify the worsening traffic conditions on almost every main road – something that is not evaluated in this rating – by conducting basic repair work so that this problem does not deter potential investors.

Not a single municipality in Java is ranked in the bottom five for the Physical Infrastructure factor. This is unsurprising, since Java has traditionally benefited the most from the development process. With a score of 0.0148, Samarinda Municipality in East Kalimantan occupies the lowest rank for this factor. Above Samarinda, we find Bengkulu (0.0182), Tanjung Balai (0.0197), Pangkal Pinang (0.0202), and Kendari (0.0208). The poor Availability of Roads, Telephone and Electricity indicators constitute serious obstacles to attracting investors to Samarinda. Similarly, Bengkulu has problems with its electricity service and with the quality of its seaport.

The striking gap between the scores gained by the top five and bottom five municipalities is testament to the fact that there has been partiality in the government's development policy over the years. For urban areas, high values for the Physical Infrastructure indicators show, at least in part, that the municipality in question was a beneficiary of the New Order regime's development policy. (See appendix 1.2.7. Ranking of 44 Municipalities based on Physical Infrastructure Factor, appendix 1.2.2. Strength and Weaknesses of 44 Municipalities by Factors and Variables, and appendix 4.6.2.5. Score of Factor, Variable and Indicator of Physical Infrastructure of 44 Municipalities).

## B. Changes In Rating From 2002 to 2003

The factors, variables and indicators used to calculate the investment attractiveness ratings in 2003 are the same as those applied in 2002. The weights of all indicators, variables and factors have also been maintained to allow for a true comparison of the rating results from the two years. The only change that has been made is the addition of a further 66 regions to the 2003 survey. The 2003



penambahan jumlah daerah yang diperingkat, yakni pada tahun 2002 berjumlah 134 Kabupaten/Kota sementara untuk tahun 2003 bertambah 66 daerah menjadi 200 daerah. Penambahan daerah yang diperingkat inilah yang kemudian menjadi salah satu penyebab perubahan peringkat daerah dalam daya tarik investasi, selain score masing-masing daerah yang berubah.

#### B.1. Perubahan Peringkat Kabupaten

Dilihat dari rata-rata yang score masing-masing daerah, rata-rata score untuk Kabupaten pada pemeringkatan tahun 2003 lebih baik dibandingkan tahun 2002. Pada tahun 2002 rata-rata score adalah 0,1791, sementara untuk tahun 2003 sebesar 0,1828. Score tertinggi untuk tahun 2003 diraih oleh Kab. Purwakarta yakni sebesar 0,3273 lebih tinggi dibandingkan score tertinggi tahun sebelumnya yang diraih oleh Kab. Daiiri yakni sebesar 0,2796.

##### B.1.1. Kelompok 10 Daerah Kabupaten Peringkat Teratas

Pada kelompok daerah yang menempati peringkat 10 teratas pada pemeringkatan tahun 2003, empat Kabupaten diantaranya adalah daerah baru yang pada pemeringkatan tahun 2002 belum diperingkat yakni, Kab. Purwakarta, Kab. Bulungan, Kab. Enrekang dan Kab. Jeneponto. Selain kabupaten-kabupaten baru, kabupaten pada pemeringkatan lama yang pada tahun 2002 belum berada pada peringkat atas, menggeser posisi daerah-daerah yang tahun lalu berada pada peringkat atas. Keberhasilan daerah-daerah tersebut masuk dalam peringkat 10 teratas karena adanya perbaikan di beberapa variabel/indikator khususnya yang mempunyai bobot besar.

Kab. Magetan naik 60 peringkat dari peringkat ke-62 pada tahun 2002 menjadi peringkat ke-2 pada tahun 2003, dan Kab. Kuningan dari peringkat ke-76 naik ke peringkat ke-5. Peningkatan peringkat daerah-daerah tersebut ke kelompok daerah peringkat teratas disebabkan perubahan di sejumlah indikator pemeringkatan yang mereka miliki terutama pada indikator-indikator yang mempunyai bobot besar. Keberhasilan Kab. Magetan menaikkan peringkat disebabkan peningkatan pada 21 indikator dari 42 indikator untuk pemeringkatan ini. Peningkatan indikator-indikator pada faktor Kelembagaan dan Faktor Sosial Politik yang mempunyai bobot 31% dan 26% merupakan kontribusi terbesar perubahan peringkat daerah tersebut. Dari 42 indikator, penurunan hanya terjadi pada 4

rating therefore encompasses a total of 200 regions, compared with the 134 districts and municipalities that were assessed in the 2002 survey. The increase in the number of rated regions is one of the reasons why a given region might have moved up or down in the rankings table, while any changes to its scores will also have affected its position.

#### B.1. Changes to the Ranking of Districts

The average overall score for the districts included in the 2003 rating has risen to 0.1828, from the 0.1791 average recorded in 2002. At 0.3273, Purwakarta District receives the highest score in the 2003 general rating; the top district in 2002 was Daiiri, which scored 0.2796.

##### B1.1. Districts in the Top Ten Ranks

Of the eleven districts that fill the ten leading ranks in the 2003 rating, four (Purwakarta, Bulungan, Enrekang and Jeneponto) are new entrants, i.e. they were not included in the 2002 survey. The upper end of the 2003 ratings table also contains a number of districts that have managed to raise their ratings significantly since 2002. The success of these regions can be attributed to improvements in several different variables and indicators, and particularly to those that have substantial weightings.

Magetan District surges ahead by 60 places; having occupied the 62<sup>nd</sup> spot in 2002, it is now ranked second. Magetan's stellar performance is caused by a rise in its ratings for 21 out of the 42 indicators. Its increased scores for the Regulation & Government Service and Socio-Political factors, which are weighted at 31% and 26%, respectively, are the most substantial contributors to the ranking. Only in four relatively small indicators – Strikes, Availability of Seaport, Quality of Roads and Quality of Seaport – does Magetan record a decrease in scores, while its score for the remaining 17 indicators are unchanged.

Tabel/Table IV.1.  
Perubahan Peringkat 5 Kabupaten  
dari Kelompok 10 Kabupaten Peringkat Atas Pada Rating 2003/  
Changes in the Rankings of Five of the Top Ten Districts in the 2003 Rating

| Keterangan                                                       | Tahun       | Kabupaten<br>MAGETAN | Kabupaten<br>JEMBRANA | Kabupaten<br>KUNINGAN | Kabupaten<br>BARITO<br>UTARA | Kabupaten<br>BANGGAI |
|------------------------------------------------------------------|-------------|----------------------|-----------------------|-----------------------|------------------------------|----------------------|
|                                                                  | <i>Year</i> | <i>District</i>      | <i>District</i>       | <i>District</i>       | <i>District</i>              | <i>District</i>      |
| <b>Peringkat</b><br><i>Rankings</i>                              | 2003        | 2                    | 4                     | 5                     | 7                            | 10                   |
|                                                                  | 2002        | 62                   | 29                    | 76                    | 39                           | 13                   |
| <b>Kelembagaan/Regulation</b><br><i>&amp; Government Service</i> | 2003        | 0,1024               | 0,1068                | 0,1021                | 0,1058                       | 0,0918               |
|                                                                  | 2002        | 0,0369               | 0,0548                | 0,0502                | 0,0587                       | 0,0783               |
| <b>Sosial Politik Budaya</b><br><i>Socio-Political</i>           | 2003        | 0,1154               | 0,0924                | 0,1026                | 0,0754                       | 0,0854               |
|                                                                  | 2002        | 0,0623               | 0,0596                | 0,0286                | 0,0389                       | 0,0674               |
| <b>Ekonomi Daerah/Regional</b><br><i>Economic Dynamism</i>       | 2003        | 0,0181               | 0,0303                | 0,0206                | 0,0482                       | 0,0442               |
|                                                                  | 2002        | 0,0155               | 0,0275                | 0,0156                | 0,0525                       | 0,0410               |
| <b>Ketenagakerjaan</b><br><i>Labor &amp; Productivity</i>        | 2003        | 0,0226               | 0,0234                | 0,0148                | 0,0181                       | 0,0165               |
|                                                                  | 2002        | 0,0150               | 0,0268                | 0,0174                | 0,0200                       | 0,0195               |
| <b>Infrastruktur Fisik</b><br><i>Physical Infrastructure</i>     | 2003        | 0,0398               | 0,0309                | 0,0396                | 0,0294                       | 0,0342               |
|                                                                  | 2002        | 0,0260               | 0,0293                | 0,0262                | 0,0138                       | 0,0246               |
| <b>TOTAL SCORE</b>                                               | 2003        | 0,2983               | 0,2838                | 0,2797                | 0,2769                       | 0,2721               |
|                                                                  | 2002        | 0,1557               | 0,1980                | 0,1380                | 0,1839                       | 0,2308               |

Arti warna : **Hijau**: menandakan kenaikan score; **Merah**: menandakan penurunan score; Putih / Tidak Berwarna: menandakan tidak ada perubahan.

Note: **Green** signifies an increased score; **Red** signifies a decreased score; **White/No Color** signifies no change.

indikator dengan bobot yang kurang besar yakni indikator intensitas unjuk rasa, akses terhadap pelabuhan laut, kualitas jalan dan kualitas pelabuhan laut, sementara 17 indikator yang lain tidak mengalami perubahan.

Peringkat Kab. Kuningan naik karena dari 5 Faktor Pemeringkatan, 4 Faktor diantaranya mengalami peningkatan, yakni Faktor Kelembagaan, Faktor Sosial Politik, Faktor Ekonomi Daerah, dan Faktor Infrastruktur Fisik. Sementara satu faktor yang mengalami penurunan adalah Faktor Tenaga Kerja. Untuk Faktor Kelembagaan peningkatan terjadi pada variabel Aparatur dan Pelayanan dan variabel Kepastian Hukum, yakni dengan peningkatan pada 9 indikator dari 11 indikator yang ada. Penurunan pada faktor Ketenagakerjaan disebabkan oleh menurunnya intensitas indikator Ketersediaan Tenaga Kerja Usia Produktif, indikator Biaya Tenaga Kerja berdasarkan aturan formal, dan indikator Produktivitas Tenaga Kerja. Indikator biaya tenaga kerja Kab. Kuningan menurun karena pada tahun 2003 daerah menaikkan UMP/UMK, dengan demikian biaya tenaga kerja menjadi

Similarly, Kuningan jumps from 76<sup>th</sup> position to fifth place in 2003, thanks to its increased ratings for four of the five factors: Regulation & Government Service, Socio-Political, Regional Economic Dynamism and Physical Infrastructure. The improved score for the important Regulation & Government Service factor is the result of increased marks for the Quality of Civil Service and Legal Certainty variables, which contain six of the nine indicators that make up this factor. The Labor & Productivity factor is the only one where Kuningan's performance has deteriorated. This is due to its reduced scores for the Productive Age, Normative Wage and Productivity indicators. In 2003, there was an increase in the UMP/UMK (Provincial/Municipal Normative Wage) in the area, which increased the cost of labor and reduced Kuningan's competitiveness vis-à-vis other regions.



meningkat sehingga menurunkan daya saingnya dibandingkan daerah lainnya.

Sementara beberapa daerah yang pada pemeringkatan tahun 2002 yang berada pada kelompok peringkat atas, juga mengalami perubahan di tahun 2003 ini. Perubahan yang terjadi pada kelompok 10 daerah kabupaten peringkat atas pada tahun 2002 tersebut terjadi karena adanya penurunan dan kenaikan di beberapa indikator pemeringkatan yang mereka miliki. Penurunan beberapa indikator penting pada daerah kelompok 10 teratas di tahun 2002, telah mengakibatkan penurunan score total yang mereka peroleh, sehingga peringkat daerah-daerah ini juga mengalami penurunan untuk tahun 2003.

Meanwhile, some of the districts that ranked in the top ten in 2002 also experience significant rating changes in 2003. Again, this is caused by decreased scores in several indicators, as well as by the entry of other, more competitive, districts to the ratings list.

**Tabel/Table IV.2**  
**Perubahan Peringkat 6 Kabupaten**  
**dari Kelompok 10 Kabupaten Peringkat Atas Pada Rating 2002/**  
**Changes in the Rankings of Six of the Top Ten Districts in the 2002 Rating**

| KETERANGAN                                                    | Tahun       | Kabupaten<br>DAIRI | Kabupaten<br>BEKASI | Kabupaten<br>PEMALANG | Kabupaten<br>GIANYAR | Kabupaten<br>BADUNG | Kabupaten<br>KUTAI<br>KERTA-<br>NEGARA |
|---------------------------------------------------------------|-------------|--------------------|---------------------|-----------------------|----------------------|---------------------|----------------------------------------|
|                                                               | <i>Year</i> | <i>District</i>    | <i>District</i>     | <i>District</i>       | <i>District</i>      | <i>District</i>     | <i>District</i>                        |
| Peringkat                                                     | 2002        | 1                  | 2                   | 4                     | 5                    | 8                   | 10                                     |
| <i>Rankings</i>                                               | 2003        | 55                 | 31                  | 132                   | 29                   | 33                  | 80                                     |
| Kelembagaan/ <i>Regulation</i><br>& <i>Government Service</i> | 2002        | 0,0989             | 0,0437              | 0,0804                | 0,0724               | 0,0630              | 0,0617                                 |
|                                                               | 2003        | 0,0684             | 0,0437              | 0,0411                | 0,0815               | 0,0725              | 0,0523                                 |
| Sosial Politik Budaya<br><i>Socio-Political</i>               | 2002        | 0,0947             | 0,0720              | 0,0973                | 0,0881               | 0,0753              | 0,0873                                 |
|                                                               | 2003        | 0,0511             | 0,0346              | 0,0322                | 0,0598               | 0,0470              | 0,0328                                 |
| Ekonomi Daerah/ <i>Regional</i><br><i>Economic Dynamism</i>   | 2002        | 0,0387             | 0,0602              | 0,0213                | 0,0297               | 0,0434              | 0,0485                                 |
|                                                               | 2003        | 0,0425             | 0,0602              | 0,0176                | 0,0321               | 0,0455              | 0,0404                                 |
| Ketenagakerjaan<br><i>Labor &amp; Productivity</i>            | 2002        | 0,0154             | 0,0453              | 0,0240                | 0,0243               | 0,0189              | 0,0172                                 |
|                                                               | 2003        | 0,0094             | 0,0490              | 0,0120                | 0,0168               | 0,0273              | 0,0209                                 |
| Infrastruktur Fisik<br><i>Physical Infrastructure</i>         | 2002        | 0,0319             | 0,0396              | 0,0286                | 0,0319               | 0,0395              | 0,0222                                 |
|                                                               | 2003        | 0,0208             | 0,0458              | 0,0202                | 0,0453               | 0,0328              | 0,0228                                 |
| TOTAL SCORE                                                   | 2002        | 0,2796             | 0,2608              | 0,2516                | 0,2464               | 0,2401              | 0,2369                                 |
|                                                               | 2003        | 0,1922             | 0,2333              | 0,1231                | 0,2355               | 0,2251              | 0,1692                                 |

Arti warna : Hijau: menandakan kenaikan score; Merah: menandakan penurunan score; Putih / Tidak Berwarna: menandakan tidak ada perubahan.

Note: Green signifies an increased score; Red signifies a decreased score; White/No Color signifies no change.

Kab. Dairi yang pada tahun 2002 berada pada peringkat pertama untuk kelompok kabupaten, pada tahun 2003 turun ke peringkat 55. Penurunan peringkat ini terjadi terutama karena adanya kemerosotan indikator-indikator pada faktor Kelembagaan, Sosial Politik, Tenaga Kerja, dan Infrastruktur Fisik, sementara untuk faktor Ekonomi

Dairi, the number one district in 2002, plunges to the 55<sup>th</sup> slot in the 2003 rating. It suffers lower scores for the Regulation & Government Service, Socio-Political, Labor & Productivity and Physical Infrastructure factors, although it does see a somewhat improved Regional Economic

Daerah mengalami sedikit perbaikan. Sebagai gambaran, dari 42 indikator pemeringkatan, Kab. Dairi mengalami penurunan di 20 indikator, dan 13 diantaranya disumbang oleh indikator yang tergabung pada faktor Kelembagaan dan Sosial Politik. Sementara kenaikan hanya terjadi pada 6 indikator yang lebih banyak pada faktor infrastruktur fisik dan ketenagakerjaan. Penurunan score sejumlah indikator dengan bobot besar tersebut secara otomatis mengakibatkan penurunan score totalnya secara cukup tajam yakni dari 0,2796 di tahun 2002 menjadi 0,1922 di tahun 2003. Penurunan score di sejumlah indikator tersebut tidak disertai dengan peningkatan pada indikator lain secara signifikan.

Penurunan peringkat paling drastis dialami oleh Kab. Pematang, yakni dari peringkat ke-4 di tahun 2002 menjadi berada pada peringkat ke-132 di tahun 2003. Penurunan peringkat Kab. Pematang ini terjadi karena seluruh faktor pemeringkatan yang dimilikinya mengalami penurunan, sehingga score total yang dimilikinya pun turun dari 0,2516 menjadi 0,1231. Jika dilihat ke tiap-tiap indikatornya, ternyata 21 indikator yang dimiliki oleh Kab. Pematang mengalami penurunan, dan hanya ada 5 indikator yang mengalami perbaikan yakni 2 pada Faktor Tenaga Kerja dan 3 lainnya dari Faktor Infrastruktur Fisik. Dari 21 indikator yang mengalami penurunan 14 diantaranya merupakan indikator yang tergabung dalam faktor Kelembagaan dan Sosial Politik yang memiliki bobot besar, diantaranya yaitu, indikator aparatur dan pelayanan, kepastian hukum, keamanan, stabilitas politik, dan lain sebagainya. Wajar sekali jika kemudian peringkat daerah ini mengalami penurunan secara drastis.

Perubahan yang tidak cukup banyak terjadi pada Kab. Bekasi, Gianyar dan Badung, sehingga peringkat ketiga daerah masih tergolong dalam peringkat atas yakni berada pada kisaran peringkat 30 teratas. Untuk faktor kelembagaan dan ekonomi daerah Kab. Bekasi tidak mengalami perubahan. Perubahan yang terjadi pada Kab. Bekasi adalah pada faktor sosial politik yang dinilai oleh para pelaku usaha di sana mengalami penurunan. Sementara untuk Faktor Tenaga Kerja dan infrastruktur fisik mengalami peningkatan. Menurut para pelaku usaha Kab. Bekasi, penurunan faktor sosial politik disebabkan adanya peningkatan gangguan keamanan terhadap kegiatan usaha maupun kepada masyarakat, sementara aparat keamanan dinilai kurang cepat dalam menangani gangguan keamanan. Walau demikian para pelaku usaha di Kab. Bekasi menilai

Dynamism factor. In a nutshell, out of 42 indicators, Dairi receives decreased scores for 20, 13 of which fall under the weighty Regulation & Government Service and Socio-Political factors. This district manages to improve its score, albeit only slightly, for just six indicators that belong to the Labor & Productivity and Physical Infrastructure factors. All in all, Dairi's total score drops from 0.2796 in 2002 to 0.1922 in 2003.

The most drastic ranking decline involves Pematang, which falls from fourth place in the 2002 rating to number 132 in 2003. Its ratings are lower for all five factors, and, at 0.2516, its overall score is less than half of the previous year's 0.1231. Pematang gets reduced marks for 21 indicators, and higher values for only five indicators – two of these come under the Labor & Productivity factor and three belong to the Physical Infrastructure factor. Of the 21 reduced indicators, 14 fall within the Regulation & Government Service and Socio-Political factors, and represent a relatively large proportion of the scores used to tabulate the general ratings. They include Quality of Civil Service, Legal Certainty, Security and Political Stability. Hence, it is unsurprising that this region experiences such a dramatic loss of rank.

Bekasi, Gianyar and Badung also move down in the most recent rankings. Bekasi, which falls from second place to number 31, has unchanged scores for the Regulation & Government Service and Regional Economic Dynamism factors, and increased marks for the Labor & Productivity and Physical Infrastructure factors. The change in its rating is therefore wholly attributable to the local business community's sharply diminished view of some of the indicators that form the Socio-Political factor. According to the survey results, there has been an escalation of security disturbances affecting both business activities and the local community, and this problem has been amplified by the slow response of security officers. Nevertheless, business operators in Bekasi say that there were fewer strikes in 2003 than in 2002, that political stability in the area has improved, and

bahwa kegiatan unjuk rasa pada tahun 2003 berkurang dibandingkan dengan tahun 2002. Demikian juga dengan stabilitas politik daerah juga semakin baik, dan masyarakat lebih terbuka terhadap kegiatan usaha.

Kab. Gianyar mengalami sedikit peningkatan untuk faktor Kelembagaan, Ekonomi Daerah, dan Infrastruktur Fisik. Sementara penurunan terjadi pada faktor Sosial Politik dan Tenaga Kerja. Menurut para pelaku usaha di Kab. Gianyar, perubahan yang terjadi pada faktor Kelembagaan adalah dengan turunnya tingkat penyalahgunaan wewenang dalam pelayanan birokrasi, berkurangnya pungutan liar di luar birokrasi, serta adanya perubahan dalam pungutan daerah. Sementara pada faktor ekonomi daerah, terjadi peningkatan pada kontribusi sektor tersier terhadap perekonomian daerah. Hal ini menunjukkan bahwa telah terjadi perbaikan iklim usaha sektor perdagangan dan jasa pariwisata di daerah ini dibandingkan dengan tahun sebelumnya.

that the local community shows a high degree of openness towards business activities.

Gianyar District sees modest gains in its ratings for the Regulation & Government Service, Regional Economic Dynamism and Physical Infrastructure factors, and falls in its Socio-Political and Labor factors. The rating for the Regulation & Government Services factor benefits from decreased use of authority in the provision of local government services, the reduction of levies sought by parties outside the bureaucracy, and an adjustment in local user charges. Under the Regional Economic Dynamism factor, the region obtains a higher score for the Tertiary Sector Added Value indicator, which points to an improvement in the business climate in the trade and tourism service sectors.

#### B.1.2. Kelompok 10 Daerah Kabupaten Peringkat Terbawah

Pada kelompok 10 daerah peringkat terbawah untuk rating tahun 2003, empat diantaranya merupakan daerah baru pada pemeringkatan tahun ini, yaitu Kab. Bondowoso, Kab. Bantul, Kab. Jember, dan Kab. Ponorogo. Empat daerah ini berada pada peringkat terbawah karena secara rata-rata nilai indikator untuk pemeringkatan ini rendah. Sementara daerah-daerah lain yang berada pada peringkat terbawah untuk tahun 2003 ini tidak banyak berubah. Sedikit perubahan yang terjadi pada kelompok 10 daerah peringkat terbawah untuk tahun 2003 jika dibandingkan dengan hasil pemeringkatan tahun 2002. Dengan mengabaikan kehadiran daerah-daerah baru pada pemeringkatan tahun ini, tampak bahwa diantara daerah-daerah yang berada pada kelompok bawah ini saling tukar posisi namun tidak beranjak ke peringkat yang lebih baik secara signifikan (Lihat Tabel IV.3. di bawah).

Kab. Bima yang pada pemeringkatan tahun 2002 berada pada peringkat terbawah (91), untuk tahun 2003 walaupun tidak berada pada peringkat paling bawah tetapi tetap berada pada kelompok 10 daerah peringkat terbawah. Secara keseluruhan Kab. Bima mengalami peningkatan score total dari 0,1117 pada tahun 2002 menjadi 0,1160 pada tahun 2003. Kenaikan score total Kab. Bima disumbang dengan sedikit perbaikan pada variabel aparatur

#### B.1.2. Districts in the Bottom Ten Ranks

The ten lowest ranks include four new entrants in 2003: Bondowoso, Bantul, Jember, and Ponorogo. These four districts get poor scores for most of the indicators assessed. The other six members of this grouping also held very low ranks in 2002. While they have made small shifts within the bottom ten, none of these regions has managed to move up to a significantly higher slot. (This can be seen in the table below.)

Bima, which in 2002 was in last place (number 91), remains near the bottom of the ratings table (139<sup>th</sup> out of 146) in 2003. Bima's overall score does, however, rise to 0.1138 from 0.1007 in 2002, thanks to small improvements in its scores for the important Quality of Civil Service, Legal Certainty, Security and Socio-Political variables. The scores of two other regions in the lowest ten ranks – Lombok Barat and

Tabel /Table IV.3.  
Perubahan Peringkat 6 Kabupaten  
dari Kelompok 10 Kabupaten Peringkat Bawah Pada Rating 2003  
Changes in the Rankings of Six of the Bottom Ten Districts in the 2003 Rating

| KETERANGAN                                  | Tahun       | Kabupaten LOMBOK BARAT | Kabupaten BIMA  | Kabupaten LAMPUNG TIMUR | Kabupaten LAMPUNG SELATAN | Kabupaten PAMEKASAN | Kabupaten FLORES TIMUR |
|---------------------------------------------|-------------|------------------------|-----------------|-------------------------|---------------------------|---------------------|------------------------|
|                                             | <i>Year</i> | <i>District</i>        | <i>District</i> | <i>District</i>         | <i>District</i>           | <i>District</i>     | <i>District</i>        |
| Peringkat                                   | 2003        | 136                    | 139             | 140                     | 143                       | 144                 | 146                    |
| <i>Rankings</i>                             | 2002        | 89                     | 91              | 90                      | 87                        | 85                  | 85                     |
| Kelembagaan/Regulation & Government Service | 2003        | 0,0338                 | 0,0485          | 0,0215                  | 0,0227                    | 0,0332              | 0,0228                 |
|                                             | 2002        | 0,0302                 | 0,0304          | 0,0237                  | 0,0318                    | 0,0404              | 0,0349                 |
| Sosial Politik Budaya                       | 2003        | 0,0349                 | 0,0276          | 0,0188                  | 0,0383                    | 0,0293              | 0,0195                 |
| <i>Socio-Political</i>                      | 2002        | 0,0320                 | 0,0260          | 0,0177                  | 0,0357                    | 0,0357              | 0,0431                 |
| Ekonomi Daerah/Regional                     | 2003        | 0,0149                 | 0,0125          | 0,0429                  | 0,0218                    | 0,0134              | 0,0141                 |
| <i>Economic Dynamism</i>                    | 2002        | 0,0139                 | 0,0177          | 0,0243                  | 0,0204                    | 0,0130              | 0,0159                 |
| Ketenagakerjaan                             | 2003        | 0,0095                 | 0,0141          | 0,0186                  | 0,0125                    | 0,0142              | 0,0148                 |
| <i>Labor &amp; Productivity</i>             | 2002        | 0,0112                 | 0,0141          | 0,0250                  | 0,0145                    | 0,0102              | 0,0126                 |
| Infrastruktur Fisik                         | 2003        | 0,0229                 | 0,0111          | 0,0102                  | 0,0148                    | 0,0140              | 0,0115                 |
| <i>Physical Infrastructure</i>              | 2002        | 0,0244                 | 0,0125          | 0,0199                  | 0,0178                    | 0,0260              | 0,0188                 |
| TOTAL SCORE                                 | 2003        | 0,1160                 | 0,1138          | 0,1120                  | 0,1101                    | 0,1041              | 0,0827                 |
|                                             | 2002        | 0,1117                 | 0,1007          | 0,1106                  | 0,1202                    | 0,1253              | 0,1253                 |

Arti warna : Hijau: menandakan kenaikan score; Merah: menandakan penurunan score; Putih / Tidak Berwarna: menandakan tidak ada perubahan.

Note: Green signifies an increased score; Red signifies a decreased score; White/No Color signifies no change.

dan pelayanan birokrasi terhadap dunia usaha, kepastian hukum, keamanan dan sosial politik. Peningkatan score ini juga dialami oleh dua daerah lainnya yang berada pada kelompok 10 bawah yaitu Kab. Lombok Barat dan Kab. Lampung Timur. Kedua daerah tersebut mengalami peningkatan untuk indikator-indikator yang tergabung dalam faktor Kelembagaan dan Sosial Politik, dimana kedua faktor ini memiliki bobot yang besar.

Pada kelompok 10 daerah peringkat terbawah ini yang mengalami penurunan score cukup drastis adalah Kab. Pamekasan dan Kab. Flores Timur, dimana kedua daerah ini pada tahun 2002 berada pada peringkat ke-85 - lebih baik dibandingkan dengan Kab. Bima, Lombok Barat, Lampung Selatan, dan Lampung Timur - namun karena secara keseluruhan faktor pemeringkatan yang mereka mengalami penurunan, maka score akhir yang mereka capai turun cukup drastis. Kedua daerah ini mengalami penurunan yang sangat signifikan pada indikator-indikator yang tergabung dalam kelompok faktor Kelembagaan dan Faktor Sosial Politik, disamping beberapa

Lampung Timur – also move up, albeit to a lesser extent. Both these districts gain better ratings for certain indicators within the Regulation & Government Service and Socio-Political factors, which have heavy weightings.

Pamekasan and Flores Timur, which tied for number 85 in 2002, get sharply lower scores for some of the indicators included in the Regulation & Government Service and Socio-Political factors, and drop to 144<sup>th</sup> (last) and 146<sup>th</sup> place, respectively.

indikator di kelompok faktor lainnya.

Perubahan positif yang sangat drastis terjadi pada Kab. Tasikmalaya, Kab. Ende, dan Kab. Pesisir Selatan. Pada pemeringkatan tahun 2002 yang lalu, ketiga daerah ini termasuk dalam kelompok 10 peringkat terbawah, namun pada pemeringkatan tahun 2003 ini mereka berhasil naik ke peringkat menengah bahkan masuk peringkat

In contrast, Tasikmalaya, Ende and Pesisir Selatan Districts manage to advance significantly in the 2003 rankings. While these three regions were in the lower ten ranks in 2002, they now appear in the upper quartile of the list, with Tasikmalaya in the top ten. (See the table below)

**Tabel/Table IV.4.**  
**Perubahan Peringkat 4 Daerah Kabupaten**  
**dari Kelompok 10 Kabupaten Peringkat Bawah Pada Rating 2002**  
**Changes in the Rankings of Four of the Bottom Ten Districts in the 2002 Rating**

| KETERANGAN                                                   | Tahun       | Kabupaten ENDE  | Kabupaten TASIKMALAYA | Kabupaten BENGKULU SELATAN | Kabupaten PESIR SELATAN |
|--------------------------------------------------------------|-------------|-----------------|-----------------------|----------------------------|-------------------------|
|                                                              | <i>Year</i> | <i>District</i> | <i>District</i>       | <i>District</i>            | <i>District</i>         |
| <b>Peringkat</b><br><i>Rankings</i>                          | 2002        | 82              | 84                    | 86                         | 88                      |
|                                                              | 2003        | 15              | 9                     | 125                        | 35                      |
| <b>Kelembagaan/Regulation &amp; Government Service</b>       | 2002        | 0,0497          | 0,0443                | 0,0382                     | 0,0208                  |
|                                                              | 2003        | 0,1003          | 0,1041                | 0,0532                     | 0,0467                  |
| <b>Sosial Politik Budaya</b><br><i>Socio-Political</i>       | 2002        | 0,0350          | 0,0258                | 0,0353                     | 0,0369                  |
|                                                              | 2003        | 0,1024          | 0,1017                | 0,0321                     | 0,0819                  |
| <b>Ekonomi Daerah/Regional</b><br><i>Economic Dynamism</i>   | 2002        | 0,0163          | 0,0195                | 0,0154                     | 0,0227                  |
|                                                              | 2003        | 0,0181          | 0,0193                | 0,0192                     | 0,0251                  |
| <b>Ketenagakerjaan</b><br><i>Labor &amp; Productivity</i>    | 2002        | 0,0124          | 0,0121                | 0,0140                     | 0,0246                  |
|                                                              | 2003        | 0,0155          | 0,0122                | 0,0116                     | 0,0576                  |
| <b>Infrastruktur Fisik</b><br><i>Physical Infrastructure</i> | 2002        | 0,0190          | 0,0293                | 0,0189                     | 0,0131                  |
|                                                              | 2003        | 0,0242          | 0,0363                | 0,0144                     | 0,0134                  |
| <b>TOTAL SCORE</b>                                           | 2002        | 0,1324          | 0,1310                | 0,1218                     | 0,1181                  |
|                                                              | 2003        | 0,2605          | 0,2736                | 0,1305                     | 0,2247                  |

Arti warna : Hijau: menandakan kenaikan score; Merah: menandakan penurunan score; Putih / Tidak Berwarna: menandakan tidak ada perubahan.

Note: Green signifies an increased score; Red signifies a decreased score; White/No Color signifies no change.

atas. (lihat Tabel IV.4. di bawah).

Kab. Ende, mengalami peningkatan yang sangat signifikan pada seluruh faktor pemeringkatan yang dimilikinya khususnya untuk faktor Kelembagaan dan Sosial Politik, hal ini mendorong score total yang diperolehnya dari 0,1324 menjadi 0,2605 dan menaikkan peringkatnya dari peringkat 82 pada tahun 2002 menjadi peringkat 15 pada tahun 2003 Untuk faktor Kelembagaan, dari 9 indikator yang ada, 6 diantaranya naik dari rata-rata cukup menjadi sangat baik, sementara dua indikatornya tetap dan satu indikator – peraturan daerah mengalami penurunan dari suportif menjadi bisa diterima.

Ende gets higher scores for all factors, and makes especially impressive gains in the Regulation & Government Service and Socio-Political factors, which boosts its total score from 0.1324 to 0.2605 and brings its ranking up from 82<sup>nd</sup> in 2002 to 15<sup>th</sup> in 2003. Under the Regulation & Government Service factor, Ende's scores for six of the nine indicators are elevated from average to very good, while its ratings for two indicators remain the same, and for one indicator – Regional Regulation – it is demoted from supportive to satisfactory.

Perubahan yang luar biasa juga dialami oleh Kab. Tasikmalaya. Walaupun mengalami penurunan pada faktor Ekonomi Daerah, namun peningkatan pada keempat faktor lainnya mampu menaikkan score totalnya dari 0,1310 menjadi 0,2736 dan merubah peringkatnya dari peringkat ke-84, melonjak ke peringkat 9 di tahun 2003. Dari 42 indikator pemeringkatan, Kab. Tasikmalaya, mengalami peningkatan di 21 indikatornya, dan penurunan hanya di 8 indikator yang memiliki bobot kurang besar seperti dalam kelompok faktor ketenagakerjaan dan infrastruktur fisik.

#### B.2. Perubahan Peringkat Kota

Jumlah daerah kota yang diperingkat untuk tahun 2003 bertambah dari 36 Kota menjadi 44 Kota. Rata-rata score total untuk daerah kota mengalami penurunan dari sebesar 0,2239 pada tahun 2002 menjadi 0,1945 pada tahun 2003. Pada tahun 2002 score tertinggi sebesar 0,3146 diraih oleh Kota Semarang, sementara untuk tahun 2003 score tertinggi diraih Kota Batam sebesar 0,2805. Score yang diraih oleh Kota Batam pada rating 2003 ini masih lebih rendah dibandingkan yang diperoleh Kota Balikpapan dan Kota Sawahlunto pada rating 2002 yaitu sebesar 0,2851 dan berada pada peringkat ke-2. Penurunan score rata-rata yang diperoleh daerah-daerah kota di tahun 2003 ini mengindikasikan bahwa di tahun ini terjadi penurunan daya tarik investasi daerah-daerah Kota di Indonesia.

##### B.2.1. Kelompok 5 Daerah Kota Peringkat Teratas

Dari kelompok 5 Kota yang menempati peringkat teratas untuk rating 2003, satu diantaranya merupakan daerah baru yaitu Kota Cilegon. Dari 5 Kota yang berada di peringkat atas pada tahun 2003 ini hanya Kota Sawahlunto yang mengalami penurunan score total, sehingga peringkatnya turun dari peringkat ke-2 menjadi peringkat ke-5.

Kota Batam pada tahun 2002 menempati peringkat ke-4, pada tahun 2003 ini berhasil menduduki peringkat pertama. Score total yang diperoleh Kota Batam juga mengalami sedikit kenaikan dari 0,2767 di tahun 2002 menjadi 0,2805 pada tahun 2003 ini. Peningkatan score Kota Batam yang hanya sedikit ini karena dari 42 indikator pemeringkatan yang dimilikinya secara merata mengalami kenaikan dan penurunan. Untuk variabel aparatur dan pelayanan, indikator pelayanan aparatur mengalami penurunan, tetapi untuk penyalahgunaan wewenang mengalami perbaikan. Penurunan pada pelayanan aparatur /

Tasikmalaya's ratings, meanwhile, undergo a sea-change in 2003. In spite of a slight decline in its result for the Regional Economic Dynamism factor, the region manages to more than double its total score from 0.1310 to 0.2736 thanks to its higher ratings for the other four factors. Thus, it leaps from the 84<sup>th</sup> spot to number nine in the latest rating. Out of 42 factors, Tasikmalaya achieves higher values for 21 indicators, and decreased scores for eight minor indicators under the Labor & Productivity and Physical Infrastructure factors.

#### B.2. Changes to the Rankings of Municipalities

The number of rated municipalities increases from 36 to 44 in 2003. Their average overall score declines to 0.1945 in 2003, from 0.2239 in 2002. In 2002, Semarang received the highest score (0.3146), while in 2003, Batam leads the rating with 0.2805. The score gained by Batam in 2003 is also below the previous year's total attained by Balikpapan and Sawahlunto (which ranked joint second with 0.2851). The decline in the average score of municipalities in 2003 indicates a slump in the investment attractiveness of municipalities around Indonesia.

##### B.2.1. Municipalities in the Top Five Ranks

Another new entrant, Cilegon, succeeds in joining the top five municipalities in the 2003 rating. Of the municipalities in the five highest ranks in 2002, only Sawahlunto get a lower rating in 2003, when it falls from second place to the fifth position.

Batam, which ranked fourth in 2002, moves up to first place in the latest rating. Its total score also improves slightly, from 0.2767 in 2002 to 0.2805 in 2003. Within the Quality of Civil Service variable, its score for the indicator of the same name falls, while its value for the Use of Authority indicator shows an increase. The downgrade of its Quality of Civil Service indicator rating probably occurs because of the ongoing transition of responsibility for providing government services to business players, from the Batam Authority to the municipal government of Batam. This also applies to the Legal Certainty variable, where

birokrasi terjadi barangkali karena saat ini sedang terjadi masa transisi dalam pelayanan birokrasi kepada pelaku usaha di Kota Batam dari pihak Otorita kepada Pemerintah Kota (pemkot) Batam. Hal ini juga berimplikasi pada variabel kepastian hukum dimana indikator konsistensi peraturan dinilai mengalami penurunan, namun untuk penegakan hukum mengalami perbaikan. Sayangnya untuk indikator-indikator keamanan mengalami penurunan. Hal ini bertolak belakang dengan perbaikan pada indikator stabilitas sosial politik seperti konflik masyarakat, intensitas unjuk rasa. Untuk kondisi Ketenagakerjaan di Kota Batam mengalami penurunan baik dari sisi ketersediaan tenaga kerja maupun dari sisi biaya tenaga kerja yang dinilai mahal. Untuk faktor ekonomi daerah Kota Batam tidak mengalami

Batam's score for the Legal Consistency indicator is lower now, although its Law Enforcement indicator score has increased. The improvement in Batam's Socio-Political indicators, such as Social Conflict and Strikes, is cancelled out by its lower scores for some of the indicators under the heavily weighted Security variable. While the region's score for the Labor & Productivity factor is higher than in 2002, its ratings for the Availability of Manpower and Labor Cost variables have gone down.

**Tabel/Table IV.5.**  
**Perubahan Peringkat 5 Kota**  
**dari Kelompok 5 Kota Peringkat Atas Pada Rating 2003**  
**Changes in the Rankings of Four of the Top Five Municipalities in the 2003 Rating**

| KETERANGAN                                       | Tahun<br>Year | KOTA<br>BATAM<br>Municipality | KOTA<br>CIREBON<br>Municipality | KOTA<br>KEDIRI<br>Municipality | KOTA<br>SAWAHLUNTO<br>Municipality |
|--------------------------------------------------|---------------|-------------------------------|---------------------------------|--------------------------------|------------------------------------|
| Peringkat<br>Rankings                            | 2003          | 1                             | 4                               | 3                              | 5                                  |
|                                                  | 2002          | 4                             | 23                              | 6                              | 2                                  |
| Kelembagaan/Regulation<br>& Government Service   | 2003          | 0,0571                        | 0,0536                          | 0,0487                         | 0,0590                             |
|                                                  | 2002          | 0,0577                        | 0,0376                          | 0,0448                         | 0,0922                             |
| Sosial Politik Budaya<br>Socio-Political         | 2003          | 0,0708                        | 0,0590                          | 0,0618                         | 0,0830                             |
|                                                  | 2002          | 0,0681                        | 0,0258                          | 0,0680                         | 0,0896                             |
| Ekonomi Daerah<br>Economic Dynamism              | 2003          | 0,0637                        | 0,0676                          | 0,0630                         | 0,0426                             |
|                                                  | 2002          | 0,0630                        | 0,0617                          | 0,0602                         | 0,0419                             |
| Ketenagakerjaan/Regional<br>Labor & Productivity | 2003          | 0,0448                        | 0,0554                          | 0,0555                         | 0,0267                             |
|                                                  | 2002          | 0,0412                        | 0,0518                          | 0,0517                         | 0,0305                             |
| Infrastruktur Fisik<br>Physical Infrastructure   | 2003          | 0,0441                        | 0,0328                          | 0,0351                         | 0,0247                             |
|                                                  | 2002          | 0,0467                        | 0,0351                          | 0,0347                         | 0,0309                             |
| TOTAL SCORE                                      | 2003          | 0,2805                        | 0,2684                          | 0,2641                         | 0,2360                             |
|                                                  | 2002          | 0,2767                        | 0,2120                          | 0,2594                         | 0,2851                             |

Arti warna : Hijau: menandakan kenaikan score; Merah: menandakan penurunan score; Putih / Tidak Berwarna: menandakan tidak ada perubahan.

Note: Green signifies an increased score; Red signifies a decreased score; White/No Color signifies no change.

perubahan.

Kota yang pada tahun 2002 tidak masuk kelompok atas di tahun 2003 ini melesat ke peringkat atas adalah Kota Cirebon yakni dari peringkat ke-23 menjadi peringkat ke-2 di tahun 2003 ini. Score total yang diraih Kota Cirebon mengalami peningkatan dari 0,2120 di tahun 2002

A new entrant to the upper end of the ratings table is Cirebon, which jumps from the 23<sup>rd</sup> slot to second place in the 2003 rating. Cirebon's total score is 0.2684, a marked improvement on the 0.2120 it gained in 2002. Its results increase for 13 indicators, most of which carry heavy



menjadi 0,2684 di tahun 2003. Keberhasilan Kota Cirebon menembus peringkat atas ini karena peningkatan 13 indikator yang dimilikinya, terutama indikator-indikator dengan bobot besar. Sementara hanya mengalami sedikit penurunan pada 4 indikator dengan bobot kurang besar yakni, Ketersediaan Tenaga Kerja Usia Produktif, UMK, Ketersediaan Jalan, dan Telpon. Indikator-indikator yang secara signifikan mendongkrak score total Kota Cirebon adalah indikator pada variabel Aparatur dan Pelayanan, Penegakan Hukum, Keamanan dan Sosial Politik.

Kota-kota yang pada pemeringkatan tahun 2002 berada pada kelompok peringkat atas, untuk pemeringkatan tahun ini beberapa diantaranya mengalami penurunan peringkat. Penurunan peringkat ini disebabkan oleh turunnya beberapa indikator yang mereka miliki, sehingga score total mereka juga turun. Kota-kota yang tidak mengalami banyak penurunan adalah Kota Sawahlunto, dan Kota Balikpapan, yang pada pemeringkatan tahun 2002 secara bersama-sama menduduki peringkat ke-2. Kota Sawahlunto walupun mengalami penurunan namun masih berada pada kelompok 5 kota peringkat atas. Sementara Kota Balikpapan berada dua tingkat dibawahnya yakni turun 5 peringkat, dari peringkat 2 ke peringkat 7. Namun demikian score total yang diraih oleh Kota Sawahlunto dan Kota Balikpapan mengalami penurunan dibandingkan dengan yang mereka peroleh pada tahun 2002. Balikpapan turun karena empat faktor pemeringkatannya mengalami penurunan dan 1 faktor yakni faktor ekonomi daerah tetap.

Sementara itu, Kota Semarang yang pada rating 2002 berada pada peringkat pertama, pada tahun 2003 turun ke peringkat 10. Hal yang kurang baik dialami oleh Kota Tangerang dan Kota Tegal. Kota Tegal turun dari peringkat ke-3 ke peringkat ke-24, sementara Kota Tangerang dari peringkat ke-5 turun ke peringkat 33. Penurunan peringkat ketiga daerah ini karena total score yang mereka peroleh mengalami penurunan cukup besar yakni Kota Semarang dari 0,3146 menjadi 0,2134, Kota Tegal dari 0,2800 menjadi 0,1933, dan Kota Tangerang dari 0,2635 menjadi 0,1734. Penurunan score total daerah-daerah tersebut patut untuk disayangkan, karena sebagian besar terjadi akibat penurunan score pada variabel-variabel yang tergabung dalam faktor Kelembagaan dan Sosial Politik. Kedua faktor tersebut merupakan variabel yang berkaitan dengan policy pemerintah daerah, seperti dalam hal pelayanan oleh aparatur kepada

weightings and are found under the Quality of Civil Service, Law Enforcement, Security and Socio-Political variables. This municipality experiences a slight drop for four comparatively minor indicators, namely Productive Age Manpower, Normative Wages, Availability of Roads and Availability of Telephone.

Conversely, some of the municipalities that held high ranks in 2002 register substantial falls in 2003. Semarang, which placed first in 2002, drops to tenth position in the latest rating. Tangerang and Tegal, meanwhile, experience serious ratings declines. Tegal falls to the 24<sup>th</sup> slot from its former third place, while Tangerang, which was previously at number five, is now ranked 33<sup>rd</sup>. These three municipalities' rankings have dropped because they all receive significantly lower total scores in 2003 – Semarang falls from 0.3146 to 0.2134, Tegal goes from 0.2800 to 0.1933, and Tangerang drops from 0.2635 to 0.1734.

The deterioration of the overall scores of these regions is particularly regrettable in light of the fact that much of it derives from the Regulation & Government Service and Socio-Political factors. These factors are closely related to local government policy, in that they comprise indicators such as Quality of Civil Service, Law Enforcement, Extortion, Legal Consistency and Speed of Security Officers. We can therefore conclude that in each of these municipalities, the local government apparatus is failing to create a favorable investment climate.

Semarang gets lower scores in 2003 for 19 out of 42 indicators, and higher values for only three. Tegal's scores go up for six indicators, while its results for 25 indicators fall. For Tangerang, the story is much the same: improved scores in three indicators, and a decline in 23 indicators. These statistics prove conclusively that these formerly top-rated municipalities have made insufficient efforts to remain attractive to investors.



dunia usaha, penegakkan hukum, pungli oleh birokrasi, konsistensi peraturan, dan sebagainya. Hal ini mengindikasikan adanya penurunan kinerja aparatur pemerintah daerah dalam menciptakan iklim investasi yang kondusif.

Two municipalities that have also slipped in the rankings, but to a lesser extent, are Sawahlunto and Balikpapan, which were ranked joint second in 2002. Although it is now in a lower position,

**Tabel /Table IV.6.**  
**Perubahan Peringkat 4 Kota**  
**dari Kelompok 5 Kota Peringkat Atas Pada Rating 2002**  
**Changes in the Rankings of Four of the Top Five Municipalities in the 2002 Rating**

| KETERANGAN                                                       | Tahun<br><i>Year</i> | KOTA<br>SEMARANG<br><i>Municipality</i> | KOTA<br>BALIKPAPAN<br><i>Municipality</i> | KOTA<br>TEGAL<br><i>Municipality</i> | KOTA<br>TANGERANG<br><i>Municipality</i> |
|------------------------------------------------------------------|----------------------|-----------------------------------------|-------------------------------------------|--------------------------------------|------------------------------------------|
| <b>Peringkat</b><br><i>Rankings</i>                              | 2002                 | 1                                       | 2                                         | 3                                    | 5                                        |
|                                                                  | 2003                 | 10                                      | 7                                         | 24                                   | 33                                       |
| <b>Kelembagaan/Regulation</b><br><i>&amp; Government Service</i> | 2002                 | 0,0733                                  | 0,0645                                    | 0,0731                               | 0,0551                                   |
|                                                                  | 2003                 | 0,0559                                  | 0,0401                                    | 0,0731                               | 0,0433                                   |
| <b>Sosial Politik Budaya</b><br><i>Socio-Political</i>           | 2002                 | 0,1033                                  | 0,0709                                    | 0,1023                               | 0,0697                                   |
|                                                                  | 2003                 | 0,0358                                  | 0,0391                                    | 0,0442                               | 0,0307                                   |
| <b>Ekonomi Daerah/Regional</b><br><i>Economic Dynamism</i>       | 2002                 | 0,0488                                  | 0,0652                                    | 0,0308                               | 0,0457                                   |
|                                                                  | 2003                 | 0,0495                                  | 0,0652                                    | 0,0246                               | 0,0492                                   |
| <b>Ketenagakerjaan</b><br><i>Labor &amp; Productivity</i>        | 2002                 | 0,0436                                  | 0,0481                                    | 0,0377                               | 0,0487                                   |
|                                                                  | 2003                 | 0,0310                                  | 0,0472                                    | 0,0192                               | 0,0183                                   |
| <b>Infrastruktur Fisik</b><br><i>Physical Infrastructure</i>     | 2002                 | 0,0456                                  | 0,0364                                    | 0,0361                               | 0,0443                                   |
|                                                                  | 2003                 | 0,0412                                  | 0,0289                                    | 0,0322                               | 0,0319                                   |
| <b>TOTAL SCORE</b>                                               | <b>2002</b>          | <b>0,3146</b>                           | <b>0,2851</b>                             | <b>0,2800</b>                        | <b>0,2635</b>                            |
|                                                                  | <b>2003</b>          | <b>0,2134</b>                           | <b>0,2205</b>                             | <b>0,1933</b>                        | <b>0,1734</b>                            |

Arti warna : Hijau: menandakan kenaikan score; Merah: menandakan penurunan score; Putih / Tidak Berwarna: menandakan tidak ada perubahan.

Note: Green signifies an increased score; Red signifies a decreased score; White/No Color signifies no change.

Penurunan score ketiga kota diatas terjadi karena hampir seluruh indikator yang mereka miliki mengalami penurunan. Kota Semarang mengalami penurunan 19 indikator dari 42 indikator permeringkatan, dan hanya meningkat di 3 indikator. Kota Tegal hanya meningkat di 6 indikator sedangkan penurunan terjadi pada 25 indikatornya. Kota Tangerang tidak jauh berbeda dengan Semarang dan Tegal, yakni dengan meningkat di 3 indikator dan turun di 23 indikatornya. Tampak sekali bahwa daya tarik daerah Kota terhadap investasi pada tahun 2003 ini secara rata-rata mengalami penurunan. Hal tersebut terlihat dari kondisi tiap-tiap indikator daerah-daerah yang berada pada peringkat atas. Walaupun mereka berada pada peringkat atas namun banyak mengalami penurunan di sejumlah indikatornya.

Fenomena menarik dari kota-kota yang

Sawahlunto still features in the top five. Meanwhile, Balikpapan is now two places below Sawahlunto, at number seven. Both municipalities have experienced an erosion of their total scores, compared with 2002. Balikpapan now gets lower scores for four factors, while its score for the Regional Economic Dynamism factor remains unchanged.

It is interesting to note that some of the municipalities that occupied the top slots in the 2002 rating – and are now in lower positions – manage to improve their results for the Regional Economic Dynamism factor in 2003, thanks to their increased ratings for the Human Development Index (HDI). This also applies to several other municipalities across Indonesia.

tahun 2002 berada pada peringkat atas ini adalah adanya kenaikan pada faktor Ekonomi Daerah. Kenaikan faktor ini disumbang oleh adanya kenaikan pada indikator Indeks Pembangunan Manusia (IPM). Hal ini berarti bahwa pada tahun 2003 ini rata-rata IPM kota-kota di Indonesia mengalami peningkatan dibandingkan dengan tahun sebelumnya.

#### B.2.2. Kelompok 5 Daerah Kota Peringkat Bawah

Ada dua daerah yang pada tahun 2002 berada pada kelompok atas merosot ke peringkat bawah pada tahun 2003 ini. Dua daerah tersebut adalah Kota Pekalongan dari peringkat 10 di tahun 2002 turun ke peringkat 43, dan Kota Bekasi dari peringkat 13 turun ke peringkat 44. Pekalongan mengalami kemerosotan pada seluruh faktor pemeringkatan yang dimilikinya sehingga score total yang diraih juga turun drastis dari 0,2479 di tahun 2002 menjadi 0,1426 di tahun 2003. Untuk Kota Bekasi peningkatan pada faktor Ekonomi Daerah tidak mampu meningkatkan peringkatnya, bahkan karena penurunan tajam pada empat faktor yang lain mengakibatkan score total yang

#### B2.2. Municipalities in the Bottom Five Ranks

Two municipalities that were in the top 15 in 2002 drop to the bottom of the ratings table in 2003. Pekalongan, which ranked tenth in 2002, is now found at number 42, while Bekasi falls from 13<sup>th</sup> place to 43<sup>rd</sup>. With reduced scores for all factors, Pekalongan's total score drops from 0.2479 in 2002 to 0.1426 in 2003. Bekasi's score for the Regional Economic Dynamism factor increases, but this cannot compensate for its sharp losses in the other four factors, and its total score plunges from 0.2369 to 0.1366. Sukabumi, Bengkulu and Pangkal Pinang, meanwhile, remain at the lower end of the ratings list. Although their scores do rise for certain factors, this is counterbalanced by decreases for other factors.

**Tabel /Table IV.7.**  
**Perubahan Peringkat 5 Kota**  
**dari Kelompok 5 Kota Peringkat Bawah Pada Rating 2003**  
**Changes in the Rankings of the Bottom Five Municipalities in the 2003 Rating**

| KETERANGAN                                             | TAHUN       | KOTA SUKABUMI       | KOTA BENGKULU       | KOTA PANGKAL PINANG | KOTA PEKA-LONGAN    | KOTA BEKASI         |
|--------------------------------------------------------|-------------|---------------------|---------------------|---------------------|---------------------|---------------------|
|                                                        | <i>Year</i> | <i>Municipality</i> | <i>Municipality</i> | <i>Municipality</i> | <i>Municipality</i> | <i>Municipality</i> |
| <b>Peringkat</b>                                       | 2003        | 40                  | 41                  | 42                  | 43                  | 44                  |
| <i>Rankings</i>                                        | 2002        | 28                  | 34                  | 36                  | 10                  | 13                  |
| <b>Kelembagaan/Regulation &amp; Government Service</b> | 2003        | 0,0397              | 0,0466              | 0,0293              | 0,0407              | 0,0325              |
|                                                        | 2002        | 0,0500              | 0,0483              | 0,0292              | 0,0690              | 0,0640              |
| <b>Sosial Politik Budaya</b>                           | 2003        | 0,0391              | 0,0343              | 0,0365              | 0,0299              | 0,0220              |
| <i>Socio-Political</i>                                 | 2002        | 0,0538              | 0,0353              | 0,0389              | 0,0969              | 0,0695              |
| <b>Ekonomi Daerah/Regional Economic Dynamism</b>       | 2003        | 0,0224              | 0,0277              | 0,0361              | 0,0239              | 0,0325              |
|                                                        | 2002        | 0,0196              | 0,0348              | 0,0359              | 0,0247              | 0,0290              |
| <b>Ketenagakerjaan</b>                                 | 2003        | 0,0269              | 0,0253              | 0,0221              | 0,0222              | 0,0183              |
| <i>Labor &amp; Productivity</i>                        | 2002        | 0,0324              | 0,0190              | 0,0258              | 0,0253              | 0,0348              |
| <b>Infrastruktur Fisik</b>                             | 2003        | 0,0243              | 0,0182              | 0,0202              | 0,0259              | 0,0313              |
| <i>Physical Infrastructure</i>                         | 2002        | 0,0365              | 0,0237              | 0,0192              | 0,0320              | 0,0396              |
| <b>TOTAL SCORE</b>                                     | 2003        | 0,1524              | 0,1521              | 0,1442              | 0,1426              | 0,1366              |
|                                                        | 2002        | 0,1923              | 0,1611              | 0,1490              | 0,2479              | 0,2369              |

Arti warna : **Hijau**: menandakan kenaikan score; **Merah**: menandakan penurunan score; Putih / Tidak Berwarna: menandakan tidak ada perubahan.

Note: **Green** signifies an increased score; **Red** signifies a decreased score; **White/No Color** signifies no change.

diraiknya turun dari 0,2369 menjadi 0,1366. Hal tersebut mengakibatkan Kota Bekasi yang pada tahun 2002 berada di peringkat ke-13, merosot tajam ke peringkat paling bawah yakni ke-44.

Untuk tiga daerah lain – Kota Sukabumi, Kota Bengkulu, dan Kota Pangkal Pinang - yang berada pada peringkat bawah pada pemeringkatan tahun 2003 ini, pada tahun sebelumnya memang berada pada kelompok peringkat bawah. Ketiganya tidak banyak mengalami perubahan yang cukup berarti karena kenaikan pada variabel yang satu tidak jauh berbeda dengan penurunan pada variabel lainnya.

Pada kelompok peringkat bawah rating tahun 2002 yang mengalami peningkatan pesat di tahun 2003 hanya Kota Mojokerto, yakni dari peringkat 32 di tahun 2002 melonjak ke peringkat 8 pada tahun 2003. Kenaikan peringkat Kota Mojokerto, disebabkan oleh peningkatan pada faktor Kelembagaan, Sosial Politik, Ekonomi Daerah, dan Infrastruktur Fisik. Peningkatan yang signifikan terjadi pada variabel Aparatur dan Pelayanan, Kepastian Hukum, dan Stabilitas Politik. Namun demikian untuk Faktor Tenaga Kerja, Kota Mojokerto mengalami penurunan

Mojokerto, which was one of the lowest-rated municipalities in 2002, experiences a swift ratings increase in 2003, and jumps from 32<sup>nd</sup> place to eighth in 2003. Mojokerto's impressive performance is attributable to its increased scores for the Regulation & Government Service, Socio-Political, Regional Economic Dynamism and Physical Infrastructure factors. It gains significantly higher marks for the Quality of Civil Service and Legal Certainty variables and the Political Stability indicator. However, its score for the Labor & Productivity factor falls because of an

**Tabel /Table IV.8.**  
**Perubahan Peringkat 3 Kota**  
**dari Kelompok 5 Kota Peringkat Bawah Pada Rating 2002**  
**Changes in the Rankings of Three of the Bottom Five Municipalities in the 2002 Rating**

| KETERANGAN                                     | Tahun<br>Year | KOTA<br>MOJOKERTO<br>Municipality | KOTA<br>BINJAI<br>Municipality | KOTA<br>PROBOLINGGO<br>Municipality |
|------------------------------------------------|---------------|-----------------------------------|--------------------------------|-------------------------------------|
| Peringkat<br>Rankings                          | 2002          | 32                                | 33                             | 35                                  |
|                                                | 2003          | 8                                 | 39                             | 32                                  |
| Kelembagaan/Regulation<br>& Government Service | 2002          | 0,0464                            | 0,0441                         | 0,0312                              |
|                                                | 2003          | 0,0801                            | 0,0353                         | 0,0407                              |
| Sosial Politik Budaya<br>Socio-Political       | 2002          | 0,0365                            | 0,0325                         | 0,0365                              |
|                                                | 2003          | 0,0497                            | 0,0349                         | 0,0296                              |
| Ekonomi Daerah/Regional<br>Economic Dynamism   | 2002          | 0,0255                            | 0,0221                         | 0,0300                              |
|                                                | 2003          | 0,0290                            | 0,0324                         | 0,0287                              |
| Ketenagakerjaan<br>Labor & Productivity        | 2002          | 0,0310                            | 0,0384                         | 0,0369                              |
|                                                | 2003          | 0,0233                            | 0,0324                         | 0,0341                              |
| Infrastruktur Fisik<br>Physical Infrastructure | 2002          | 0,0238                            | 0,0242                         | 0,0262                              |
|                                                | 2003          | 0,0334                            | 0,0222                         | 0,0443                              |
| TOTAL SCORE                                    | 2002          | 0,1632                            | 0,1613                         | 0,1608                              |
|                                                | 2003          | 0,2155                            | 0,1572                         | 0,1774                              |

Arti warna : Hijau: menandakan kenaikan score; Merah: menandakan penurunan score; Putih / Tidak Berwarna: menandakan tidak ada perubahan.

Note: Green signifies an increased score; Red signifies a decreased score; White/No Color signifies no change.

score. Hal ini disebabkan karena adanya peningkatan biaya tenaga kerja, baik berdasarkan upah tenaga kerja sebagaimana diatur dalam UMK, maupun dari upah aktual. Sementara untuk Kota Binjai dan Kota Probolinggo dapat dikatakan tidak mengalami perubahan peringkat yang cukup berarti.

Adapun daerah-daerah lainnya tidak mengalami perubahan yang luar biasa. Kalaupun ada perubahan hanya terjadi sedikit kenaikan atau penurunan di sejumlah indikator, demikian juga dengan peringkatnya tidak terjadi perubahan besar. Sebagai contoh adalah yang terjadi pada Kota Binjai dan Kota Probolinggo. Kota Binjai mengalami peningkatan di 10 indikator dan turun pada 12 indikatornya. Hal tersebut menyebabkan score total Kota Binjai mengalami sedikit penurunan dari 0,1613 menjadi 0,1572 di tahun 2003, dan peringkatnya juga turun dari 33 ke peringkat 39. Sebaliknya score total Probolinggo mengalami sedikit peningkatan dari 0,1608 menjadi 0,1774 di tahun 2003, dan menaikkan peringkatnya dari 35 di tahun 2002 menjadi peringkat 32 di tahun 2003. Kenaikan score dan peringkat Kota Probolinggo ini disebabkan oleh peningkatan 11 indikator yang mereka miliki dari rata-rata sedang-kurang menjadi baik-sangat baik, sementara indikator yang turun hanya ada 8 indikator, itupun bukan indikator yang memiliki bobot besar.

increase in labor costs, which is manifested in lower scores for the Actual Wage and Normative Wage indicators.

The overall scores gained by Binjai and Probolinggo, which were also in the lowest five ranks in 2002, show no significant changes, and they remain near the bottom of the list. Their gains and losses are also comparatively well balanced. Binjai receives better scores for ten indicators and lower score for 12 indicators. Its total score declines slightly from 0.1613 to 0.1572, while its ranking falls from 33 (out of 36) to 38 (out of 43). In contrast, Probolinggo's overall score increases from 0.1608 in 2002 to 0.1774 in 2003, while its ranking rises significantly from 35 in 2002 to 31 in 2003. The improvement in Probolinggo's score and ranking stem from its advances in 11 indicators; however, there are also eight relatively lightweight indicators where its score is lower in 2003.

### C. Permasalahan Diluar Peringkat

#### C.1. Permasalahan Pada Faktor Kelembagaan

Pada pemeringkatan daya tarik investasi kabupaten/Kota untuk tahun 2003 ini ditemukan sejumlah permasalahan yang berkaitan dengan faktor-faktor kelembagaan. Beberapa permasalahan yang berhasil ditangkap dalam penelitian ini diantaranya adalah berkaitan dengan biaya-biaya tidak resmi, pelayanan yang dilakukan oleh birokrasi daerah kepada para pelaku usaha, dan peraturan daerah. Berikut ini adalah beberapa temuan yang berkaitan dengan faktor Kelembagaan.

##### C.1.1. Biaya-Biaya Tidak Resmi

Hasil penelitian terhadap pelaku usaha di 200 Kabupaten/Kota di Indonesia memperlihatkan bahwa hingga saat ini dunia usaha di Indonesia cukup terbebani dengan berbagai pungutan tidak resmi. Pungutan tidak resmi (pungli) yang dialami oleh pelaku usaha bisa

### C. Problems that Fall Outside the Rating Results

#### C.1. Problems Related to the Regulation & Government Services Factor

In the process of conducting the 2003 survey of the investment attractiveness of 200 districts and municipalities around Indonesia, we uncovered a number of problems related to the Regulation & Government Service factor. Among them are problems connected with illegal fees, the quality of the civil service and local regulations. These findings are detailed below.

##### C.1.1. Illegal Fees

It can be seen from the research findings that the business community in Indonesia is quite heavily burdened by illegal levies and extortion of various kinds. These unlawful charges can be divided into two distinct origins: within the bureaucracy, and outside of it. The illegal levies

dibedakan menjadi dua, yakni pungutan tidak resmi di lingkungan birokrasi dan pungutan tidak resmi di luar birokrasi. Pungutan tidak resmi di lingkungan birokrasi dilakukan oleh aparat pemerintah daerah, dan dalam proses peradilan. Pungutan tidak resmi di luar birokrasi dilakukan di lingkungan mereka melakukan kegiatan usaha yang biasa dilakukan oleh aparat keamanan, kelompok masyarakat sekitar, kelompok preman dan sebagainya.

Dilihat dari jenis pungutan tidak resmi yang biasa harus mereka bayar, biaya tidak resmi dalam proses peradilan merupakan biaya tidak resmi yang paling banyak dikeluhkan oleh para responden yakni 13,1% responden, disusul dengan biaya tidak resmi oleh aparat keamanan (11,5% responden), pungli oleh kelompok masyarakat (8,5%) responden, pungli oleh preman sebanyak 6,1% responden, sisanya adalah biaya tidak resmi lainnya. Dilihat dari bidang usahanya, diketahui bahwa responden yang menilai biaya-biaya tidak resmi tinggi bahkan sangat tinggi adalah responden yang bergerak di bidang usaha kehutanan, agroindustri/bisnis (perkebunan dan pertanian pangan), dan pertambangan. Bidang-bidang usaha tersebut rawan terhadap berbagai pungutan oleh banyak pihak selain karena berbasis lahan luas, juga dinilai oleh banyak kalangan sebagai usaha yang diuntungkan oleh “anugerah alam”. Pada sisi yang lain banyak kalangan juga merasa bahwa kegiatan usaha tersebut kurang memberikan kontribusi yang cukup baik bagi pemerintah daerah setempat maupun bagi masyarakat sekitarnya. Karena basis usahanya yang merupakan “anugerah alam”, siapa saja merasa punya hak untuk memiliki, menguasai, dan paling tidak berhak memperoleh manfaat dari keberadaan “anugerah” tersebut. Tidak mengherankan jika kemudian muncul berbagai pungutan terhadap kegiatan usaha ini. Pungutan tersebut biasa terjadi baik ketika berhubungan dengan pihak birokrasi maupun pada jalur-jalur distribusi hasil produksi, yang dilakukan oleh aparat keamanan, kelompok masyarakat, hingga preman.

**Pungutan Tidak Resmi dalam Proses Peradilan.** Jika dilihat dari jenis-jenis pungutan tidak resmi, responden dunia usaha yang menilai biaya tidak resmi dalam proses peradilan tinggi hingga sangat tinggi, 35,9% diantaranya adalah pelaku usaha yang bergerak di sektor agroindustri / bisnis (perkebunan dan pertanian pangan), 29,7% responden yang bergerak di bidang kehutanan, 13,1% responden industri, dan 12,6% responden perdagangan dan jasa. Dari sektor-sektor usaha

within the bureaucracy are fees and other payments demanded by local government officials, and by other players in the judicial process. Illegal charges outside the bureaucracy, on the other hand, are usually extracted from the business community by security officers, groups from the surrounding community, gangsters and the like.

Of all the different types of illegal levies that business operators must pay, illegal fees within the judicial process are perceived by the respondents as the most onerous (13.1%), followed by illegal charges imposed by security officers (11.5%), extortion by community groups (8.5%) and extortion by gangsters (6.1%).

Companies that operate in the forestry, agro-industry (plantations and food crops) and mining sectors consider illegal fees to be high or very high. These sectors are vulnerable to the imposition of a multitude of levies by several parties since, aside from occupying large land areas, they are popularly seen as profitable business sectors thanks to their dependence on “nature’s bounty”. Moreover, there is a widespread perception that these firms are not making sufficient contributions to their respective local governments and communities. Given the common view that the local people are automatically entitled to own, control, or at least obtain benefit from, “nature’s bounty”, it is not surprising that companies that exploit these resources are subjected to a variety of unofficial fees and charges. These levies are usually imposed in dealings with the bureaucracy, or by security officers, community groups and gangsters during the distribution of output.

**Illegal Levies in the Judicial Process.** Of the respondents who consider unlawful fees levied in the judicial process to be high or very high, 35.9% are engaged in agro-industry (plantations and food crops), 29.7% are active in the forestry sector, 13.1% are from industry, and 12.6% are from the trading and service sector. Since many of these businesses depend on natural resources and require extensive land areas for their operations, they frequently face problems in areas such as land

yang menilai biaya tidak resmi dalam proses peradilan tinggi (perkebunan, kehutanan, dan pertambangan) terdapat karakteristik yang hampir sama yakni merupakan usaha-usaha yang berbasis sumber daya alam dan memerlukan lahan yang luas. Hal ini mengakibatkan sektor-sektor usaha tersebut merupakan sektor usaha yang sering menghadapi permasalahan pada saat penguasaan lahan usaha mereka (sengketa tanah), maupun menghadapi isu-isu lingkungan hidup (pencemaran, pengrusakan ekosistem, dll). Penyelesaian permasalahan tersebut sering kali harus melalui proses peradilan yang memakan waktu dan juga biaya, termasuk didalamnya biaya tidak resmi yang jumlahnya oleh para pelaku usaha dinilai cukup tinggi.

**Pungutan Tidak Resmi oleh Aparat Keamanan.** Responden yang menilai pungutan tidak resmi oleh aparat keamanan tinggi hingga sangat tinggi adalah sebesar 11,5%. Dilihat dari bidang usaha responden yang terbesar adalah yang bergerak di bidang kehutanan yakni sebanyak 37,8%, disusul bidang usaha agroindustri / bisnis (perkebunan dan pertanian pangan) sebesar 32,8%, perikanan 17,4%, manufaktur 10,8%, pertambangan 9,8%, dan lainnya 8,3%. Pungutan tidak resmi oleh aparat keamanan biasa terjadi pada jalur-jalur pengangkutan komoditas hasil usaha sektor-sektor yang bersangkutan maupun untuk keamanan lingkungan. Sektor usaha dengan basis lahan luas seperti perkebunan, pertanian, dan pertambangan, biasanya juga rawan terhadap kejahatan, seperti pencurian, pengrusakan, ancaman keamanan, sengketa atau kriminalitas lainnya. Kondisi ini memunculkan pihak-pihak yang “menawarkan perlindungan keamanan”, dengan imbalan tertentu, dari sinilah muncul pungutan oleh aparat keamanan.

**Pungutan Tidak Resmi oleh Kelompok Masyarakat.** Pungutan tidak resmi yang juga meresahkan dunia usaha adalah yang dilakukan oleh kelompok masyarakat, baik yang terorganisasi secara formal (ormas), maupun organisasi yang tidak formal seperti kelompok pemuda kampung, pendekar/jawara (kelompok beladiri) dan sebagainya. Untuk pungutan tidak resmi oleh kelompok masyarakat ternyata sektor kehutanan juga merupakan sektor yang paling sering mengalami. Dari responden yang menilai pungutan jenis ini tinggi hingga sangat tinggi untuk bidang usaha kehutanan adalah sebesar 29,7%, disusul sektor pertambangan sebanyak 14,1%, dan perkebunan sebanyak 13%, perdagangan dan jasa 8,6%, industri 8,1%, dan

occupancy (land disputes) or the environment (pollution, destruction of ecosystems, etc.). Settling these problems often requires a court process that consumes a great deal of time and money. A considerable proportion of the cost of any judicial process of this nature consists of illegal fees.

**Illegal Levies Imposed by Security Officers.** 11.5% of respondents think illegal charges levied by security officers are high or very high. Of the respondents who hold this view, the largest group are engaged in the forestry sector (37.8%), followed by agro-industry (plantations and food crops) (32.8%), the fishery sector (17.4%), manufacturing (10.8%), mining (9.8%) and other sectors (8.3%). Security officers often impose these levies in situations where goods are being transported, and where the surrounding area “needs” to be made secure. Firms that operate over extensive land areas, such as plantations, farms and mining companies, are usually also vulnerable to criminal actions, such as theft, destruction, security threats or disputes. It is these conditions that spawned the emergence of parties offering “security protection” in exchange for compensation, which in turn led to the proliferation of fees charged by security officers.

**Illegal Levies Imposed by Community Groups.** The business community also reports that it is burdened by unofficial levies extracted by community groups, whether formal organizations or informal associations such as rural youth groups and martial arts clubs. It appears that the forestry sector is the most prone to this particular kind of illegal charge. Of the businesses that say they have to pay high or very high illegal levies to community groups, 29.7% are in the forestry sector. The mining sector represents 14.1% of respondents who concur with this statement, followed by the plantation sector (13.0%), trading and services (8.6%), industry (8.1%) and other sectors that range from 2% to 4%. Meanwhile, at 6.1%, the number of respondents who say they pay illegal

sektor usaha lainnya berkisar antara 2% – 4%. Sementara untuk pungutan liar yang dilakukan oleh kelompok preman jumlahnya tidak terlalu signifikan, yakni hanya sebesar 6,1% responden yang menilai pungutan oleh preman cukup meresahkan. Walau nilainya kecil tetapi hal ini perlu mendapat perhatian dari aparat pemerintah daerah, karena akan dapat mengganggu kegiatan usaha.

**Beban Pungutan Tidak Resmi.** Dari berbagai pungutan tidak resmi, baik yang dilakukan oleh aparat keamanan, birokrasi pemda, masyarakat, maupun preman, bila diakumulasikan besarnya pungutan tidak resmi yang harus dikeluarkan dibandingkan dengan biaya produksi, diperoleh rata-rata sebesar 2%. Sebanyak 337 responden (7,3%) bahkan mengaku bahwa seluruh pungutan-pungutan tidak resmi yang harus mereka keluarkan mencapai antara 8% s/d 10% dari biaya produksi. Additional cost akibat pungutan tidak resmi sebesar 2% dari biaya produksi ini bagi para pelaku usaha sangat signifikan mempengaruhi jalannya usaha mereka, karena sangat membebani bagi pertumbuhan usaha mereka. Dalam perspektif persaingan global, adanya tambahan biaya-biaya yang semestinya tidak perlu dikeluarkan, tentunya dapat mengurangi daya saing dunia usaha Indonesia di tingkat internasional.

#### C.1.2. Pelayanan Birokrasi

Sektor-sektor usaha yang beroperasi di suatu wilayah administrasi daerah atau negara tertentu sangat wajar bila harus berhadapan dengan birokrasi pemerintahan. Hal ini sangat disadari oleh para pelaku usaha, bahwa sebuah dunia usaha yang bertanggung jawab tentunya membutuhkan legalisasi dari otoritas pemerintah (baik pemerintah pusat maupun pemda) tempat mereka melakukan kegiatan usaha. Konsekwensi dari menjalankan kegiatan usaha secara legal ini adalah, adanya sejumlah kewajiban yang harus mereka laksanakan, seperti pengurusan perizinan, maupun memberikan kontribusi bagi pemerintah setempat seperti membayar pajak, retribusi dan lain sebagainya.

Sebagian besar pelaku usaha tidak mempermasalahkan dan menganggap hal tersebut bukanlah sesuatu yang memberatkan dengan catatan mereka juga mendapatkan hak serta pelayanan yang baik, seimbang dengan kewajiban yang telah mereka jalankan. Namun dalam praktiknya ketika mereka akan menjalankan kewajiban tersebut, seringkali dihadapkan pada pelayanan dengan kualitas yang tidak sesuai

charges to gangsters is comparatively modest, but is quite disturbing, even so. Therefore, this matter requires local government attention since it cause disruption to business activities.

**The Burden of Illegal Levies.** In total, these various illegal levies, whether imposed by security officers, local government officials, community groups or gangsters, amount to an average of 2% of a company's operating costs. As many as 337 respondents (7.3%) admit that illegal levies make up 8-10% of their operating costs. Even a 2% additional cost element is very significant to a business operator, and places a considerable burden on the growth of the company. From the perspective of global competition, these additional fees – which, being illegal, do not, strictly speaking, actually need to be paid – definitely reduce the international competitiveness of businesses operating in Indonesia.

#### C.1.2. The Quality of the Civil Service

It is perfectly normal for companies, wherever they operate, to have to deal with government officials. Business executives tend to take this for granted, since all responsible business players undergo a process of legalization by the relevant government authorities (central and/or local government). As a consequence of this legal requirement, businesses have certain obligations, such as to obtain licenses, and to make contributions to their respective local governments in form of taxes and user charges.

The majority of business operators do not regard this as an encumbrance, provided that they receive a level of service that corresponds to the requirements they are complying with, and that their rights are protected. However, in Indonesia, the reality is that even when they fulfill their obligations, business people are still faced with low-quality service – and their businesses suffer.

dengan yang mereka harapkan, bahkan justru menambah beban bagi kegiatan usaha mereka. Dalam pelayanan birokrasi oleh pemerintah daerah terhadap kegiatan usaha, seperti pada saat pengurusan perizinan, sertifikasi, pengawasan, maupun berbagai keperluan lainnya, selain harus membayar sejumlah uang sebagaimana ketentuan resmi yang berlaku di tiap-tiap daerah, para pelaku usaha juga masih harus membayar biaya-biaya tidak resmi. Biaya tidak resmi ini biasanya untuk memperlancar pelayanan yang mereka butuhkan.

**Kejelasan Jalur Birokrasi.** Dari hasil penelitian ini, berkaitan dengan kejelasan jalur birokrasi dalam pelayanan pemda terhadap dunia usaha, walaupun rata-rata para pelaku usaha menilai relatif jelas (37,5% menilai cukup jelas, dan 35,4% menilai jelas), namun masih ada 23,8% responden para pelaku usaha di daerah juga menilai kejelasan jalur birokrasi pelayanan pemda terhadap dunia usaha masih kurang baik. Para pelaku usaha yang menilai kejelasan jalur birokrasi kurang baik ini kebanyakan adalah para pelaku usaha yang bergerak di bidang pertambangan dan perkebunan (45,2% responden), kehutanan (11,9%), dan industri (7.3%).

**Ketepatan Waktu Pelayanan.** Dilihat dari ketepatan waktu dalam penyelesaian pelayanan birokrasi sebagian besar pelaku usaha juga menilai cukup (40,2% responden), 29,9% responden menyatakan baik, namun demikian 26% responden yang lain menyatakan ketepatan waktu pelayanan birokrasi oleh pemda masih kurang baik. Responden-responden yang menilai ketepatan waktu pelayanan birokrasi kurang baik tersebut 46% bergerak di bidang usaha perkebunan dan kehutanan, 15% perdagangan dan jasa, 12% mereka yang bergerak di bidang industri.

**Biaya Pelayanan.** Berkaitan dengan biaya yang harus dikeluarkan oleh pelaku usaha dalam pengurusan birokrasi pemda, dari 5.140 orang responden pelaku usaha 4.364 orang (84.9%) mengaku harus mengeluarkan biaya tidak resmi diluar biaya yang seharusnya mereka bayar, dan 776 responden (15,1) persen tidak menjawab. Dari 4.364 responden yang menjawab pertanyaan mengenai besarnya tambahan biaya tidak resmi yang harus dikeluarkan dalam pelayanan birokrasi, diperoleh kesimpulan bahwa untuk memperoleh pelayanan birokrasi, para pelaku usaha harus mengeluarkan tambahan biaya tidak resmi sebesar 60,62% dari biaya resmi / yang seharusnya dikeluarkan. Hanya ada 84 responden (1.9%), yang menyatakan bahwa tambahan biaya tidak resmi yang harus mereka bayar lebih dari

In order to obtain business-related services, such as licenses, certificates or supervision, from local government officials, they have to pay unofficial fees in addition to the official charges. These illegal levies usually help to speed up the processing of the services they need.

**Clear Service Lines.** We can see from the research findings that 23.8% of respondents believe that when it comes to providing services to the business community, the bureaucratic lines within the local government are unclear. 37.5% regard the service lines as fairly clear, and 35.4% think they are clear. A plurality of the business players who say government service lines are lacking in clarity (45.2%) operate in the farming and plantation sectors, while 11.9% are engaged in forestry, and 7.3% are involved in industry.

**Punctuality of Service.** 40.2% of respondents consider their local governments' punctuality in providing services to the business community to be satisfactory, while 29.9% think it is good and 26.0% find it unsatisfactory. Of those who are dissatisfied with the service providers' punctuality, 46% are involved in forestry and plantations, 15% engage in trading and services, and 12% in industry.

**Service Fees.** When we asked the 5,140 survey respondents about the fees they pay in conjunction with their dealings with local government officials, 4,364 (84.9%) admitted that they pay illegal charges in addition to the official fees, while 776 respondents (15.1%) did not provide an answer. The 4,364 respondents who answered the question pay an average of 60.62% of the official fees in illegal levies in order to obtain the government services they require to run their businesses. Only 84 respondents (1.9%) say that the additional unlawful fees they pay amount to more than 100% of the official charges. At any level, illegal fees constitute additional costs that reduce a firm's productivity and competitiveness.



100% dari biaya yang resmi yang semestinya mereka keluarkan. Tambahan biaya tidak resmi ini merupakan *high cost* bagi dunia usaha yang dapat menurunkan produktivitas dan daya saingnya.

#### C.1.3. Peraturan Daerah

Hal yang juga mendapat perhatian para pelaku usaha adalah regulasi yang mengatur kegiatan usaha mereka. Pada era otonomi daerah ini peraturan daerah merupakan regulasi di tingkat Kabupaten / Kota yang dampaknya langsung terkena pada para pelaku usaha. Dari hasil survei ini, rata-rata para pelaku usaha di daerah menilai perda-perda atau kebijakan yang dikeluarkan oleh pemerintah daerah dalam 3 tahun pelaksanaan otonomi daerah cukup mendukung atau sekurangnya tidak mengganggu/menghambat kegiatan usaha mereka. Hal ini terlihat dari 5.140 responden yang diwawancarai, 44,8% responden menilai perda/kebijakan daerah cukup mendukung, 28,3% responden bahkan menilai mendukung sampai sangat mendukung. Namun demikian kita tidak dapat mengabaikan bahwa masih ada 20,2% responden yang menilai kurang mendukung bahkan tidak mendukung kegiatan usaha mereka, dan 6,8% responden tidak mengetahui mengenai perda-perda di daerahnya. Masih ada 20,2% yang menyatakan bahwa perda-perda di daerahnya kurang / tidak mendukung kegiatan usaha mereka memperlihatkan bahwa masih cukup banyak daerah yang mengeluarkan perda-perda yang kontraproduktif terhadap kegiatan dunia usaha.

Bila dibandingkan dengan hasil kajian tekstual KPPOD terhadap 896 dokumen perda yang berhubungan dengan kegiatan usaha yang dikeluarkan oleh 200 pemda yang disurvei, diperoleh hasil 64 Daerah (32%) perdanya dinilai distortif, 107 daerah (53,5%) perdanya bisa diterima, 29 daerah (14,5%) dinilai suportif terhadap kegiatan usaha. Analisis tekstual perda oleh KPPOD walaupun menghasilkan jumlah daerah yang memiliki perda distortif lebih besar (32% daerah) dibandingkan dengan hasil survei pendapat responden yang hanya 20% responden, tetapi bisa dikatakan tidak jauh berbeda Hasil kajian tekstual perda memperoleh 32% daerah perdanya dinilai bermasalah menunjukkan potensi distorsi perda terhadap kegiatan usaha, sementara dari pendapat 20% responden menunjukkan bahwa telah terjadi distorsi perda atau kebijakan daerah terhadap kegiatan usaha mereka. Pada intinya kedua hasil survei tersebut menunjukkan bahwa masih banyak daerah yang mengeluarkan atau membuat perda-

#### C.1.3. Local Regulations

Member of the business community are also concerned about the regulations that govern their activities. In this era of regional autonomy, local regulations enacted at the district or municipal level have a direct impact on business. According to the results of this survey, most business people believe that the regulations and policies issued by local governments in the first three years of regional autonomy are sufficiently supportive, or at least do not disturb or obstruct their commercial activities. 44.8% of respondents stated in the interviews that they regard local regulations and policies as sufficiently supportive of their operations, while 28.3% see them as highly supportive. Nonetheless, we cannot ignore the fact that 20.2% of respondents think local regulations and policies do not support, or even constrain, their businesses, while 6.8% say they know nothing about local regulations.

The results of a textual study by KPPOD concerning 896 business activity-related local regulations issued by the 200 local governments surveyed show that, based on a set of criteria determined by the research team, 64 regions (32%) have issued distortive regulations, 107 regions (53.5%) have issued acceptable regulations, and 29 (14.5%) have issued regulations that are supportive of business. If we compare the findings related to regulations seen as detrimental to business in the two surveys, we see that the textual analysis shows that 32% of regions have distortive regulations, while in the investment attractiveness survey, 20% of respondents say local regulations or policies have a negative effect on their business activities. We can therefore conclude that many regions are indeed issuing regulations that are unfriendly towards business and investment activities.

perda yang kurang bersahabat dengan kegiatan usaha dan investasi.

#### C.2. Permasalahan Pada Faktor Sosial Politik

Berkaitan dengan faktor Sosial Politik, mengenai pemeringkatan daya tarik investasi daerah ini juga menemukan sejumlah permasalahan menyangkut hal-hal yang terkait erat dengan kondisi sosial politik suatu daerah maupun secara nasional. Persoalan-persoalan yang ditemukan tersebut antara lain mengenai; pelibatan pelaku usaha dalam perumusan kebijakan daerah, mekanisme pengawasan kebijakan daerah oleh masyarakat, kondisi keamanan daerah, konflik sosial, konflik politik, keterbukaan masyarakat terhadap kegiatan usaha, serta aktivitas unjuk rasa berkaitan dengan kegiatan usaha.

##### C.2.1. Pelibatan Pelaku Usaha dalam Perumusan Kebijakan Daerah

Kualitas kebijakan daerah yang tertuang dalam berbagai peraturan daerah tentunya berkaitan erat dengan proses perumusan kebijakan tersebut. Salah satu hal yang dapat mempengaruhi kualitas kebijakan daerah / perda yang dihasilkan oleh daerah adalah adanya pelibatan *stakeholders* dalam proses perumusannya, terutama mereka yang berhubungan atau yang akan terkena dampak dari kebijakan yang akan dikeluarkan oleh pemda. Jika dilihat proses perumusan kebijakan daerah, dari 5.140 responden yang disurvei 4.344 orang (84,5%) diantaranya menyatakan bahwa proses perumusan perda di daerahnya tidak melibatkan kalangan dunia usaha, 1,8% responden menilai pelibatannya kurang baik atau tidak baik, 6,8% menilai cukup baik dan 4,4% menilai pelibatan dunia usaha dalam perumusan kebijakan daerah baik atau bahkan sangat baik.

Temuan di atas mempertegas jika kemudian banyak daerah yang menghasilkan perda-perda yang kurang akomodatif terhadap pelaku usaha dalam menjalankan kegiatan usahanya. Hal ini tentu saja kontradiktif dengan pernyataan para pejabat pemda yang menyatakan bahwa selama ini pemda selalu melibatkan para pelaku usaha dan *stakeholder* lainnya dalam setiap perumusan kebijakan daerah. Hal yang biasa terjadi dalam proses perumusan kebijakan di berbagai daerah selama ini adalah hanya melibatkan para pelaku usaha yang tergabung dalam asosiasi, atau bahkan hanya para pengurusnya saja. Bentuk pelibatanpun hanya pasif sekedar formalitas agar dalam perumusan kebijakan daerah tampak

#### C.2. Problems Related to the Socio-Political Factor

A number of problems that are closely related to socio-political conditions that affect the investment attractiveness of a given region, as well as the country as a whole, come to light in this study. Some of these issues concern the involvement of the business community in formulating local regulations, while others are connected with the mechanisms of public oversight of local policies, security conditions in the region, social conflict, political conflict, public openness towards business activities, and strikes.

##### C.2.1. The Involvement of the Business Community in Formulating Local Policies

The quality of the policies that help to shape various local regulations is definitely closely related to the process of policy formulation. One of the factors that may affect the quality of local policies and regulations produced by a region is the involvement of stakeholders in the process of formulation – primarily those that are connected with, or will be affected by, local policies and regulations. Of the 5,140 respondents in this survey, 4,344 (84.5%) assert that the business community is never involved in the process of originating local regulations. 925 (1.8%) acknowledge that there is some participation, but say that it does not run well, 349 (6.8%) say that the business community's input plays quite a large role in the process and 226 (4.4%) put a very high value on the involvement of business players in the formulation of local policy.

On this basis, it is unsurprising that many regions routinely produce local regulations that are less than accommodative of the needs of the business community. Even so, local government officials have been claiming for years that they always involve business people and other stakeholders in this process. In practice, many regional administrations meet with only those business people who are members of a business association or its board when drafting policies. This represents a passive form of involvement, and is merely a formality that shows that the process is participative. In many cases, the “consultation” occurs only in the socialization phase, and so does not allow the business community to influencing

partisipatif, atau sekedar dalam sosialisasi tanpa dapat mempengaruhi bentuk kebijakan yang akan diambil oleh pemerintah. Dengan demikian perlu kiranya dilakukan perbaikan dalam proses pelibatan *stakeholder* pada perumusan kebijakan daerah agar lebih dapat mewakili masing-masing pihak.

#### C.2.2. Mekanisme Pengawasan Kebijakan Pemda Oleh Masyarakat

Dilihat dari sisi mekanisme pengawasan kebijakan pemda oleh masyarakat, ditemukan ada 26,1% responden yang menilai mekanisme pengawasan kebijakan pemda tidak baik bahkan tidak ada, sementara 49,8% menilai cukup baik, dan 21,2% menilai baik dan sangat baik. Dari 26,1% responden yang menilai kurang baik atau bahkan tidak baik, mempertegas bahwa pemerintah daerah juga kurang akomodatif terhadap pengawasan yang dilakukan oleh masyarakat terhadap kebijakan-kebijakan yang telah mereka tetapkan. Namun demikian jika dilihat dari penilaian responden terhadap konsistensi pemerintah daerah dalam melaksanakan peraturan yang telah mereka buat sendiri, terlihat bahwa selama ini pemerintah daerah tetap konsisten dalam melaksanakan kebijakan atau peraturan-peraturan yang telah mereka buat. Dari hasil survei diperoleh bahwa 40,2% responden menilai cukup konsisten, 44,1% menilai konsisten dan sangat konsisten. Hanya 13,8% responden yang menilai kurang konsisten hingga tidak konsisten, dan sisanya sebanyak 1,8% tidak tahu.

#### C.2.3. Keamanan

Secara umum kondisi keamanan daerah-daerah di Indonesia relatif aman untuk kegiatan usaha. Hal ini bertentangan dengan pandangan banyak pihak khususnya investor asing yang menilai kondisi keamanan di Indonesia tidak kondusif untuk kegiatan usaha. Dari penelitian ini 43,9% pelaku usaha di 200 daerah kabupaten / kota di Indonesia menilai kondisi keamanan cukup aman, bahkan 48,1% pelaku usaha menyatakan aman dan sangat aman. Sementara pelaku usaha yang menyatakan kondisi keamanan untuk kegiatan usaha kurang aman dan tidak aman hanya sebanyak 6,1%, yang menunjukkan bahwa masih ada beberapa daerah di Indonesia yang kurang aman untuk aktivitas usaha. Dilihat dari kondisi keamanan lingkungan masyarakat sekitar lokasi kegiatan usaha juga dapat dikatakan relatif aman. Dari penilaian 45,4% responden pelaku usaha menilai kondisi keamanan lingkungan

the structure of the policy at all. Hence, there is an urgent need to expand the involvement of stakeholders in the process of formulating local policy.

#### C.2.2. The Mechanism for Public Oversight of Local Policy

This study shows that 26.1% of respondents regard the system of public oversight of local policy as poor or non-existent, 49.8% think it is fairly good, and 21.2% see it as good or very good. The fact that over a quarter of commercial players think that the public oversight system is poor or completely absent confirms that local governments are not very accommodative of public scrutiny of their policies. On the other hand, the findings show that local governments have for many years been consistent in enforcing their own policies and regulations. 40.2% of respondents say that their local governments are fairly consistent on this score, while 44.1% consider them consistent or very consistent, and 13.8% believe they are inconsistent.

#### C.2.3. Security

In contrast to what many people, especially potential foreign investors believe, Indonesia is generally seen as safe for commercial activities. According to 48.1% of business people operating in 200 districts and municipalities around the country, Indonesia is safe or very safe, while 43.9% of them say that conditions are fairly safe. Only 6.1% claim that security conditions for business are not safe in the regions where they operate. Security conditions in communities located adjacent to business areas are regarded as relatively good. 45.4% of respondents think the situation in the surrounding community is fairly safe, while 41% consider it safe, and 5.6% view it as very safe. However, 7.1% of respondents say that the condition of the surrounding community is not safe.

cukup aman, 41% menilai aman, dan 5,6% sangat menilai sangat aman. Walau demikian perlu juga untuk mendapat perhatian bahwa masih ada 7,1% responden yang menilai bahwa kondisi lingkungan mereka masih kurang aman dan tidak aman.

Penelitian ini juga menemukan bahwa semakin besar skala usaha dari para responden memiliki rasa aman yang semakin kurang. Semakin besar perusahaan dilihat dari jumlah tenaga kerja mereka rasa amannya semakin berkurang. Dari 5,3% responden dengan skala usaha kecil (TK s/d 20 orang) menilai kondisi keamanan kurang aman dan tidak aman, 6,9% dari pelaku usaha skala menengah (TK 21 s/d 100 orang), sementara untuk pelaku usaha skala besar (TK lebih dari 100 orang) menilai kurang aman dan tidak aman sebanyak 12,8%. Hal yang sama juga terjadi pada penilaian responden yang menilai kondisi keamanan lingkungan masyarakat sekitar kegiatan usaha kurang aman dan tidak aman, yakni 6,4% dari pelaku usaha skala kecil, 8,5% pelaku usaha skala menengah, dan 10,6% dari pelaku usaha skala besar.

Jika dilihat dari jawaban responden berdasarkan asal investor, memperlihatkan adanya kecenderungan bahwa investor yang berasal dari luar daerah cenderung merasa kurang aman dibandingkan dengan investor dari daerah yang bersangkutan. Hal ini diperlihatkan oleh jawaban responden yang menilai gangguan keamanan lingkungan masyarakat kurang aman dan tidak aman adalah 3,7% dari responden BUMD/BUMN, 7% dari pengusaha lokal, sementara untuk pelaku usaha yang berasal dari luar daerah lebih besar, yakni dari responden PNDN luar daerah sebesar 10,1% dan dari responden PMA sebesar 10%. Hal yang sama juga terjadi untuk penilaian responden terhadap keamanan untuk kegiatan usaha, dimana untuk responden yang menilai kurang aman/tidak aman, untuk responden yang berasal dari PMDN luar daerah sebanyak 10,7% dan 12,2% dari responden PMA. Hal tersebut lebih besar dibandingkan dengan responden pelaku usaha yang berasal dari daerah setempat yakni sebesar 5,5%, dan 5,2% dari responden pelaku usaha BUMD/BUMN.

Namun demikian secara keseluruhan dapat dikatakan bahwa kondisi keamanan di berbagai daerah di Indonesia relatif aman. Rendahnya prosentase responden pelaku usaha di 200 daerah penelitian yang menyatakan keamanan kurang, menunjukkan bahwa hanya sebagian kecil daerah di Indonesia yang tidak kondusif untuk

This research also reveals that business people who run large-scale enterprises with a large number of employees tend to feel less safe than those who operate smaller firms with relatively few workers. 5.3% of the respondents with small-scale firms (with up to 20 employees) say security conditions are fairly poor or poor, as do 6.9% of those who operate medium-scale companies (21 to 100 employees), and 12.8% of those who run large businesses (more than 100 employees). Similarly, 6.4% of small business operators, 8.5% of those who run medium-sized businesses, and 10.6% of those who operate large-scale entities regard security conditions in neighboring communities as fairly poor or poor.

If we look at the origins of the respondents, we can see that investors from outside the regions where they operate tend to feel less safe than local investors. 3.7% of respondents from local government-owned enterprises and state-owned enterprises, 7.0% of those who operate local enterprises, 10.1% of people who run domestic direct investment companies (PMDNs) from other parts of Indonesia, and 10.0% of those in charge of foreign direct investment companies (PMAs) state that conditions in their neighboring communities are fairly unsafe or unsafe. The same pattern is seen in the assessment of the security situation in their immediate areas of operation. As many as 10.7% of respondents from PMDNs from outside the region and 12.2% of those from PMAs see the situation as fairly unsafe or unsafe. Only 5.5% of people who run local firms and 5.2% of those from state-owned and local government-owned enterprises concur with this view.

To sum up, it is clear that security conditions in most regions in Indonesia are considered to be relatively good. Only a small percentage of the respondents from business communities in 200 research areas indicate that there are security problems in the areas where they operate. Nonetheless, there should be serious efforts

kegiatan usaha. Perlu upaya-upaya serius dari para pihak, khususnya di daerah-daerah yang dirasakan kurang aman, untuk segera memperbaiki kondisi keamanan daerahnya. Harus ada upaya dari pihak-pihak yang berwenang untuk mensosialisasikan bahwa dilihat dari faktor keamanan, Indonesia cukup kondusif untuk melakukan investasi. Perlu adanya pemetaan daerah-daerah yang dinilai kurang aman agar tidak terjadi generalisasi terhadap kondisi keamanan Indonesia yang akan merugikan bagi upaya peningkatan investasi.

#### C.2.4. Konflik Sosial

Untuk kondusifitas usaha dilihat dari konflik sosial yang ada di daerah - seperti bentrokan antar kampung, antar etnis, dan sebagainya, sebagian besar responden menilai cukup kondusif. Hal ini bisa dilihat dari pernyataan 61,6% responden pelaku usaha yang mengaku tidak ada konflik sosial. Sementara yang menyatakan ada konflik sosial yang mengganggu hanya sebanyak 11,2%, yang menilai konflik sosial sedang-sedang saja sebanyak 11,1%, dan yang menilai kurang / tidak mengganggu sebanyak 16,2%. Pelaku usaha yang mengaku terganggu dengan adanya konflik sosial yang terjadi di daerah dimana mereka melakukan kegiatan usaha adalah 11,3% dari responden yang memiliki skala usaha kecil, 13% dari responden dengan skala usaha menengah, sementara dari responden dengan skala usaha besar adalah 23,2% nya. Dari sini terlihat bahwa semakin besar skala usaha seseorang, mempengaruhi penilaian mereka terhadap kondusifitas lingkungan sosial dilihat dari konflik sosial yang terjadi di daerahnya.

#### C.2.5. Konflik Politik

Dari sisi politik secara umum daerah-daerah di Indonesia cukup kondusif. Hal ini terlihat dari jawaban 57% pelaku usaha yang menyatakan tidak ada konflik politik baik antar elit politik di daerah, anggota DPRD, maupun antara DPRD dan Pemerintah Daerah. Sementara yang merasa konflik politik tidak mengganggu aktivitas usaha mereka sebanyak 14,4% responden, dan yang merasa konflik politik sedang sebanyak 10,3% responden, sedangkan yang merasa terganggu dengan adanya konflik politik sebanyak 8,2% responden.

Dari penelitian ini juga ditemukan bahwa semakin besar skala usaha yang dilakukan oleh seseorang merasa bahwa gangguan konflik politik terhadap aktivitas usahanya semakin besar.

around the country, and especially in the regions that are considered unsafe, to strengthen security conditions. In the meantime, the authorities should disseminate the findings of this study to show that, in general, security conditions in Indonesia are conducive to investment. There is a need to map the unsafe regions to avoid generalization about security conditions, which may harm investment promotion efforts throughout the country.

#### C.2.4. Social Conflicts

In general, business people believe that social conflicts in their respective regions –clashes between villages or ethnic groups, and the like – do not pose a great challenge to their operations. A full 61.6% of respondents say that there are no social conflicts in their areas. Only 11.2% claim that social conflicts are disruptive to their businesses, while 11.1% say that social conflicts in their areas have a slight negative effect on their operations. 16.2% acknowledge that there are social conflicts in their regions, but say that they do not disturb their businesses. 11.3% of small-scale business operators say they experience disruption from social conflicts, as do 13.0% of medium-sized companies and 23.2% of large enterprises. These figures demonstrate that the larger the business, the greater the influence of social conflicts on its operations.

#### C.2.5. Political Conflicts

Political conflicts also cause few relatively problems for the business community. 57.0% of business people say there are no political conflicts among political elites in the region, among members of the local Regional Representatives' Council, or between the Regional Representatives' Council and the local government. Meanwhile, 14.4% of respondents feel unaffected by political conflicts and 10.3% feel moderately affected, while 8.2% of respondents say they that political conflicts do disturb their business activities.

We can also see from this research that large-scale businesses are more often affected by political conflicts than their smaller counterparts. 7.5% of the respondents from small-scale enterprises, 8.3%

Terlihat dari jawaban pelaku usaha yang menilai konflik politik mengganggu kegiatan usahanya, 7,5% dari responden skala usaha kecil, 8,3% dari responden skala menengah, 13,8% dari responden skala besar.

#### C.2.6. Keterbukaan Masyarakat

Dari indikator keterbukaan masyarakat terhadap kegiatan usaha / investasi, diketahui bahwa secara umum masyarakat terbuka terhadap kegiatan usaha / investasi yang ada di daerahnya. Dari 5.140 responden pelaku usaha, 5,8% diantaranya menilai sikap masyarakat tertutup / kurang terbuka, 44,6% menyatakan cukup terbuka, 48,3% menilai terbuka bahkan sangat terbuka. Walaupun sebagian besar responden menilai sikap masyarakat terbuka terhadap kegiatan usaha / investasi namun ada kecenderungan bahwa masyarakat di daerah kurang terbuka terhadap kegiatan usaha / investasi dari luar daerahnya.

Dari penilaian para pelaku usaha yang ada di daerah berdasarkan asal investornya, memperlihatkan ada kecenderungan prosentase responden pelaku usaha dari luar daerah yang menilai masyarakat daerah cukup terbuka hingga sangat terbuka lebih kecil dibandingkan dengan pelaku usaha dari daerah yang bersangkutan (investor lokal). Responden yang menilai masyarakat cukup terbuka hingga sangat terbuka untuk pelaku usaha lokal sebesar 93,8%, BUMN/ BUMD sebesar 93,3%, responden PMDN luar daerah 89,1%, dan responden PMA sebesar 83,4%. Ada kecenderungan pelaku usaha dari luar daerah menilai masyarakat kurang terbuka terhadap kegiatan usaha mereka dibandingkan dengan pelaku usaha lokal. Dari penilaian pelaku usaha yang menilai masyarakat kurang terbuka/tertutup terhadap kegiatan usaha untuk pelaku usaha lokal (dari daerah yang bersangkutan) sebesar 5,2%, BUMN/ BUMD 6%, sementara dari PMDN luar daerah ada 9,9% responden, dan PMA ada 12,2% responden. Hal ini menunjukkan bahwa masyarakat cenderung kurang terbuka dengan investor yang berasal dari luar daerahnya. Masyarakat lebih suka jika kegiatan usaha dilakukan oleh para pelaku usaha yang berasal dari daerahnya sendiri. Jika ada orang dari daerah yang mampu melakukan kegiatan usaha, mengelola potensi daerahnya, mereka akan lebih terbuka / lebih suka dibandingkan jika dilakukan oleh orang dari daerah lain. Tetapi yang harus dicatat bahwa hal ini merupakan penilaian dari sisi para pelaku usaha terhadap keterbukaan masyarakat atas kegiatan usaha yang mereka lakukan di daerah

of those from medium-sized firms and 13.8% of those from large-scale companies view political conflicts as disturbing to their operations.

#### C.2.6. Public Openness

The results of this study show that people are generally open to business and investment activities in their regions. Of the 5,140 respondents from the business community, only 5.8% regard the public as not at all open or not very open. 44.6% say that local people are fairly open to business and investment, and 48.3% think they are open or very open. While the majority of respondents believe the public displays a reasonable or good degree of acceptance towards business or investment activities, local communities are seen as less welcoming of business operations that are set up by investors from other regions or countries.

93.8% of respondents from local companies regard the local community as fairly open, open or very open, as do 93.3% of those from state-owned and local government-owned enterprises. 89.1% of those running PMDNs from outside the region and 83.4% of business people in charge of PMA companies share this view. In other words, business operators from other regions are more likely than local business people to judge local people as insufficiently open towards their business activities.

However, it is important to note that the survey findings portray the business community's impressions of how open local people are towards their business activities, rather than the opinions of the local people regarding the presence of business activities in their regions. Therefore, the findings should not be interpreted as direct evidence of a public preference for businesses operated by local sons and daughters.

yang bersangkutan, bukan merupakan pendapat dari masyarakat atas kehadiran aktivitas usaha di daerahnya. Jadi tidak dapat secara langsung diartikan sebagai preferensi masyarakat terhadap asal pelaku usaha yang melakukan kegiatan usaha di daerahnya.

#### C.2.7. Intensitas Unjuk Rasa

Kegiatan unjuk rasa selama ini sering disebut sebagai salah satu persoalan yang dapat mengganggu aktivitas perekonomian. Dari penelitian ini ternyata sebagian besar pelaku usaha di daerah rata-rata merasa tidak terganggu oleh aktivitas unjuk rasa, baik itu unjuk rasa oleh buruh, mahasiswa, maupun kelompok masyarakat lainnya. Dari penelitian ini ditemukan bahwa 41% pelaku usaha menyatakan tidak ada kegiatan unjuk rasa di daerahnya. Pelaku usaha yang menyatakan ada unjuk rasa yang mengganggu aktivitas usaha mereka adalah sebesar 8,9%, sementara yang menilai unjuk rasa tidak terlalu berpengaruh terhadap aktivitas usaha sebanyak 11,7%, dan yang menyatakan ada tetapi tidak merasa terganggu bahkan sangat tidak terganggu adalah sebesar 38,4%.

Jika dilihat dari skala usaha para responden, dapat diketahui bahwa ada kecenderungan semakin besar skala usaha yang mereka miliki, maka rasa aman dari aktivitas unjuk rasa semakin rendah. Terlihat dari responden yang merasa terganggu atas kegiatan unjuk rasa yaitu sebesar 6,7% dari responden pelaku usaha skala kecil, 12% dari skala usaha menengah, dan 28,5% dari responden pelaku usaha skala besar. Hal ini bisa dipahami bahwa semakin besar perusahaan baik dilihat dari permodalan maupun dari jumlah tenaga kerja yang mereka pekerjakan, resiko yang mereka tanggung semakin besar pula, termasuk didalamnya adalah resiko menghadapi aksi unjuk rasa dari para buruh mereka.

#### C.3. Permasalahan yang Terkait dengan Ekonomi Daerah

##### **Lembaga Keuangan di Daerah**

Peran lembaga keuangan bagi kegiatan usaha sangat penting, disamping sebagai lembaga yang bertindak sebagai intermediasi - menarik dana dan menyalurkan dana dari masyarakat, termasuk didalamnya untuk penyediaan kredit permodalan bagi kegiatan usaha - lembaga keuangan seperti bank juga berfungsi sebagai penyaluran dana untuk kepentingan pembayaran antar dua pihak yang terkait kewajiban. Dari

#### C.2.7. Strikes

Strikes are commonly seen as one of the problems that can disturb economic activities. However, the study reveals that most companies do not experience disruption from strikes, whether initiated by labor unions, students or other community groups. 41.0% of business operators say that there are no strikes in their regions. 8.9% of respondents admit that strikes do interrupt their business activities from time to time, while 11.7% perceive this to be a common occurrence, and 38.4% acknowledge that strikes take place, but say that they do not disrupt their business activities.

Just as there is a correlation between the size of a business operation and the effect that social and political conflicts have on it, we find that large-scale enterprises are more susceptible to industrial action that disrupts their operations. 6.7% of small businesses experience interruptions because of strikes, as do 12.0% of medium-scale firms and 28.5% of large-scale enterprises. These findings reinforce the impression that large companies bear greater exogenous risks than their smaller counterparts.

#### C.3. Problems Related to the Regional Economic Dynamism Factor

##### **Financial Institutions in the Regions**

Financial institutions play a very important role in the business environment of a region as, apart from acting as intermediary institutions that collect and channel private savings and other funds, they also provide loans to finance business activities. Financial institutions such as banks also function as conduits for payments between two or more parties. The survey results show that most business people consider the number of banks to

penilaian para pelaku usaha di daerah diketahui bahwa dilihat dari ketersediaan (jumlah kantor bank) yang ada sekarang ini dinilai relatif cukup baik. Terlihat dari 38,9% pelaku usaha yang menilai cukup, dan 41,7% menilai memadai dan sangat memadai, sementara yang menilai kurang dan sangat kurang sebesar 17,2%. Masih adanya 17,2% pelaku usaha yang menilai ketersediaan bank kurang memadai menunjukkan bahwa keberadaan bank masih belum merata ke seluruh penjuru daerah di Indonesia.

Jika dilihat dari skala usahanya ternyata semakin besar skala usaha yang dilakukan semakin merasa kekurangan akan jumlah bank. Dari responden yang menyatakan jumlah kantor bank kurang memadai adalah, 19,1% dari pelaku usaha skala besar, 18,1% dari pelaku usaha skala menengah, dan 17,6% dari skala usaha kecil. Hal ini menunjukkan pula bahwa ketersediaan bank yang ada di berbagai daerah ini cenderung hanya mampu untuk melayani skala usaha yang relatif kecil. Selanjutnya jika dilihat dari kemampuan bank untuk melakukan fungsi intermediasi dan penyediaan dana 40% responden menyatakan cukup memadai, 31,8% menyatakan memadai, sementara yang menilai kurang memadai masih ada sebesar 26,1%. Ini membuktikan bahwa disamping ketersediaan bank yang memang masih kurang merata ke berbagai daerah, kemampuan melakukan intermediasi juga relatif masih kurang.

#### C.4. Permasalahan Tenaga Kerja

Tenaga kerja merupakan satu faktor penting dalam suatu kegiatan usaha, karena merupakan penggerak utama kegiatan usaha. Rendahnya kualitas sumber daya manusia menyebabkan rendahnya kualitas tenaga kerja, dan pada akhirnya kualitas perekonomian, dan sosial budaya bangsa menjadi rendah. Sebagai alat ukur kualitas angkatan kerja tidak hanya cukup dilihat dari tingkat pendidikan formal saja. Hal tersebut terutama didasarkan pada alasan bahwa untuk bekerja, terutama di sektor non formal, sering tidak hanya membutuhkan pendidikan formal, melainkan pendidikan non formal, seperti keterampilan dan pengalaman kerja. Dengan demikian idealnya harus dilihat juga pendidikan non formal dari angkatan kerja yang ada.

##### C.4.1. Kualitas Tenaga Kerja

Dari penilaian para pelaku usaha di 200 daerah penelitian, diperoleh gambaran bahwa tenaga kerja di Indonesia secara rata-rata dikatakan mempunyai kualitas cukup untuk memasuki

be adequate. 38.9% of them say there are enough banks, while 41.7% believe the availability of banks is good or very good. However, 17.2% of respondents say that the number of banks is inadequate, which indicates that there is an uneven distribution of banks around the country.

It appears that large business operators are slightly more likely to feel that the number of banks is sufficient for their needs. 19.1% of respondents from large-scale enterprises, 18.1% of those from medium-sized companies, and 17.6% of small business operators say that the availability of banks is inadequate. This indicates that the banks operating in some regions tend to serve only relatively small-scale enterprises. When we asked business people about the capacity of the banks in their regions to perform intermediary and financing functions, 40.0% of them rated the banks' capacity to do so as adequate, 31.8% acknowledged that it is good, and 26.1% said it is inadequate. This proves that, on top of the uneven geographic distribution of banks, the banks' capacity to act as intermediary channels is relatively low.

#### C.4. Problems Related to the Labor & Productivity Factor

Labor is one of the most important aspects of any business operation. Low quality human resources lead to a low quality workforce, which in turn has a negative impact on the quality of a country's economy and socio-cultural environment. Formal education is not the only yardstick for assessing the quality of the labor force. This is because workers, especially in the informal sector, need not only a formal education, but also informal education and qualifications such as skills and work experience. Hence, informal education should also be viewed as a valid gauge of manpower quality.

##### C.4.1. The Quality of the Labor Force

The responses of 5,140 business people in 200 districts and municipalities around Indonesia indicate that the quality of the Indonesian labor force generally meets the needs of existing



lapangan kerja yang tersedia. Hal ini terlihat dari jawaban 5.140 pelaku usaha di 200 kabupaten/kota, dimana 61% menilai kualitas tenaga kerja di daerahnya cukup, sementara 21,2% yang lain menyatakan kurang berkualitas / rendah, dan 16,6% menilai tenaga kerja di daerahnya mempunyai kualitas tinggi.

Ada perbedaan persepsi antara pelaku usaha yang mempekerjakan sedikit karyawan dibandingkan dengan pelaku usaha yang mempekerjakan banyak karyawan dalam menilai kualitas tenaga kerja. Hal ini bisa dilihat dari jawaban para pelaku usaha yang menilai kualitas tenaga kerja di daerahnya kurang baik. Dari pelaku usaha yang mempekerjakan karyawan lebih dari 100 orang, yang menilai kualitas tenaga kerja kurang baik sebesar 30,9%, sementara pelaku usaha yang mempekerjakan karyawan antara 20 s/d 100 orang hanya sebesar 20,7%, dan dari pelaku usaha yang mempekerjakan karyawan kurang dari 20 orang hanya sebanyak 20,4%. Dari data ini tampak jelas bahwa para pelaku usaha yang memiliki skala usaha besar dan membutuhkan tenaga kerja lebih banyak, cenderung mempunyai penilaian kurang baik terhadap kualitas tenaga kerja yang ada, dibandingkan dengan para pelaku usaha yang memiliki skala usaha kecil dan tenaga kerja sedikit.

#### C.4.2. Produktivitas Tenaga Kerja

Kebutuhan dunia usaha terhadap tenaga kerja tidak hanya dilihat dari kualitas yang tercermin dari keterampilan dan pendidikan yang dimiliki oleh tenaga kerja, melainkan juga dilihat dari sisi produktivitas tenaga kerja. Produktivitas ini bisa diukur dari kemampuan seseorang dalam menghasilkan suatu output tertentu dalam satu satuan waktu tertentu. Secara rata-rata produktivitas tenaga kerja di 200 daerah penelitian juga dapat dikatakan cukup, terlihat dari jawaban 5.140 pengusaha, dimana 59,4% diantaranya menyatakan produktivitas tenaga kerja di daerahnya cukup. Sementara pelaku usaha yang menilai produktivitas tenaga kerja kurang baik/rendah sebanyak 20,2%, sebaliknya yang menilai produktivitas tenaga kerja tinggi adalah sebanyak 20%.

Perbedaan jumlah karyawan yang dipekerjakan oleh para pelaku usaha yang menjadi responden penelitian ini, tampaknya mempengaruhi penilaian mereka terhadap kualitas tenaga kerja. Dari para pelaku usaha yang menilai produktivitas tenaga kerja rendah, untuk pelaku usaha dengan karyawan berjumlah kurang

commercial operations. 61.0% of respondents regard the quality of manpower in their regions as satisfactory, while 21.2% say it is unsatisfactory, and 16.6% consider the available workforce to be of high quality.

Business people who employ a small number of workers generally have a more positive view of the quality of the labor force than those who have large payrolls. 30.9% of respondents who employ more than 100 individuals, 20.7% of those who have 21 to 100 workers, and 20.4% of those who employ up to 20 people say that the quality of the labor force in their regions is unsatisfactory.

#### C.4.2. Labor Productivity

It is not only the skills and education of the labor force that are of concern to business leaders – productivity is another very important aspect of the quality and efficiency of a commercial operation. Productivity is defined as the capacity of an individual to achieve a certain output within a given length of time. The majority (59.4%) of the 5,140 respondents from different 200 regions assert that workers in their areas of operation display a satisfactory level of productivity. 20.2% believe that the productivity of the labor force is unsatisfactory, and almost the same percentage of business people (20.0%) consider it to be high.

Again, the size of a company has an impact on the opinion of its owners and management regarding the productivity of the labor force. 19.4% of those who employ up to 20 workers say that the labor force has an unsatisfactory level of productivity, while 20.9% of business operators with 21 to 100 workers, and 29.0% of those who

dari 20 orang adalah sebanyak 19,4%, pelaku usaha dengan jumlah karyawan sebanyak 20 s/d 100 orang yang menilai produktivitas karyawannya rendah sebanyak 20,9%, sedangkan pelaku usaha dengan jumlah karyawan lebih dari 100 orang sebesar 29%. Melihat data-data di atas, tampaknya ada indikasi bahwa tenaga kerja yang ada di berbagai daerah sekarang ini mendapat penilaian kurang produktif untuk perusahaan berskala besar dengan jumlah tenaga kerja besar. Tenaga kerja kita masih kurang kompetitif / kurang siap untuk memasuki lapangan kerja yang *full skill*.

employ more than 100 people agree with this view. This indicates that the labor force in a number of regions is seen as insufficiently productive by large-scale enterprises employing many workers. Our labor force is still uncompetitive, and is ill equipped to enter industries that require advanced skills.

#### C.5. Permasalahan Infrastruktur Fisik

#### C.5. Problems Related to the Physical Infrastructure Factor

##### C.5.1. Jalan Darat

##### C.5.1. Roads

Berdasarkan hasil survei ditemukan bahwa menurut para pelaku usaha di daerah ketersediaan jalan darat saat ini dapat dikatakan cukup memadai, terbukti 56,7% dari responden pelaku usaha menilai ketersediaan jalan darat memadai hingga sangat memadai, sementara 29,1% menilai cukup memadai. Namun demikian

The business operators interviewed in this survey tend to be satisfied with the availability and/or accessibility of existing roads. 56.7% of them say that the level of access to roads in their regions is good or very good, and 29.1% say its is adequate. However, 16.3% of respondents are dissatisfied with road availability and/or

Tabel/Table IV.9.

#### Ketersediaan dan Kualitas Jalan Darat 200 Kabupaten dan Kota di Indonesia

#### Accessibility and Quality of Roads in 200 Districts and Municipalities in Indonesia

| KETERANGAN         | PANJANG JALAN MENURUT JENIS PERMUKAAN<br>LENGTH OF ROADS BY TYPE |                           |                        |                                    |                         |
|--------------------|------------------------------------------------------------------|---------------------------|------------------------|------------------------------------|-------------------------|
|                    | ASPAL<br>ASPHALT<br>(Km)                                         | KERIKIL<br>PEBBLE<br>(Km) | TANAH<br>SOIL<br>(Km)  | TDK DIRINCI<br>UNSPECIFIED<br>(Km) | JUMLAH<br>TOTAL<br>(Km) |
| Kota/Municipality  | 11.809.722,30<br>92,32%                                          | 371.015,60<br>2,90%       | 392.527,88<br>3,07%    | 218.954,42<br>1,71%                | 12.792.220,19<br>100%   |
| Kabupaten/District | 30.298.806,14<br>66,94%                                          | 5.765.304,91<br>12,74%    | 6.344.583,81<br>14,02% | 2.852.987,73<br>6,30%              | 45.261.682,59<br>100%   |
| Total              | 42.108.528,44<br>72,53%                                          | 6.136.320,50<br>10,57%    | 6.737.111,69<br>11,60% | 3.071.942,15<br>5,29%              | 58.053.902,78<br>100%   |

  

| KETERANGAN         | PANJANG JALAN MENURUT KONDISI/KUALITAS<br>LENGTH OF ROADS BY CONDITION/QUALITY |                           |                          |                                      |                         |
|--------------------|--------------------------------------------------------------------------------|---------------------------|--------------------------|--------------------------------------|-------------------------|
|                    | BAIK<br>GOOD<br>(Km)                                                           | SEDANG<br>AVERAGE<br>(Km) | RUSAK<br>DAMAGED<br>(Km) | RUSAK BERAT<br>BADLY DAMAGED<br>(Km) | JUMLAH<br>TOTAL<br>(Km) |
| Kota/Municipality  | 8.496.330,47<br>62,59%                                                         | 3.367.687,23<br>24,81%    | 1.269.083,74<br>9,35%    | 441.453,17<br>3,25%                  | 13.574.568,34<br>100%   |
| Kabupaten/District | 13.620.226,16<br>30,09%                                                        | 13.454.027,07<br>29,73%   | 11.528.763,65<br>25,47%  | 6.657.567,96<br>14,71%               | 45.260.582,39<br>100%   |
| Total              | 22.116.556,63<br>37,59%                                                        | 16.821.714,30<br>28,59%   | 12.797.847,39<br>21,75%  | 7.099.021,13<br>12,07%               | 58.835.150,73<br>100%   |

Sumber: Data Infrastruktur Jalan Kabupaten / Kota di Indonesia, BPS 2001, yang telah diolah.

Source: Data on Road Infrastructure in Districts/Municipalities in Indonesia, BPS 2001, already processed.

masih ada responden yang menilai ketersediaan jalan darat kurang bahkan sangat kurang memadai yaitu sebesar 16,3%. Jika dilihat dari kualitas jalan yang sudah tersedia 55% menilai baik dan sangat baik, sementara yang menilai cukup sebanyak 27,9%, dan yang menilai kurang baik hingga sangat tidak baik sebesar 16,2% dari responden.

Berdasarkan data ketersediaan jalan darat di 200 daerah Kabupaten / Kota di Indonesia (daerah pemeringkatan) diketahui bahwa dilihat dari jenis permukaan jalan 27,47% diantaranya merupakan jalan yang tidak beraspal. Untuk kondisi permukaan jalan, berdasarkan data panjang jalan darat 200 daerah Kabupaten / Kota di Indonesia, terlihat bahwa jalan dengan kondisi baik hanya 37,59%, sedang 28,59%, sedangkan jalan dengan kondisi rusak hingga rusak berat mencapai 33,83%.

Apabila kita lihat secara terpisah antara daerah kota dan daerah kabupaten terlihat bahwa daerah kota memiliki ketersediaan dan kualitas jalan yang lebih baik dibandingkan dengan daerah kabupaten. Untuk ketersediaan jalan, 92,32% jalan di daerah kota merupakan jalan beraspal, sementara untuk daerah kabupaten jalan yang beraspal hanya sebesar 66,94%. Jika dilihat dari kondisi permukaan atau kualitas jalan, daerah kota juga jauh lebih baik dibandingkan dengan daerah kabupaten. Untuk kondisi permukaan baik, rata-rata daerah kota sebesar 62,59%, sementara untuk daerah kabupaten hanya sebesar 30,09%. Sedangkan untuk jalan dengan kondisi rusak hingga rusak parah daerah kabupaten jauh lebih besar yaitu 40,18% sementara untuk daerah kota hanya sebesar 12,60%. Temuan di atas menunjukkan adanya kesenjangan yang cukup besar antara ketersediaan dan kualitas jalan di daerah kota dan kabupaten. Hal ini menunjukkan bahwa kondisi infrastruktur fisik khususnya jalan darat di Indonesia sebagai sarana transportasi utama untuk mendukung kegiatan usaha perlu mendapat perhatian yang serius. Apabila kondisi ini tidak segera dibenahi tentunya akan menghambat kegiatan usaha, dan pada gilirannya akan menurunkan daya tarik Indonesia terhadap investasi. Pemerintah daerah, khususnya daerah-daerah yang memiliki ketersediaan jalan kurang perlu untuk mengalokasikan dana dalam APBD mereka untuk menambah jumlah jalan, serta untuk pemeliharaan jalan yang sudah ada.

accessibility. Meanwhile, 55.0% of business leaders maintain that the quality of existing roads is good or very good, while 27.9% think it is adequate, and 16.2% consider it to be inadequate or very bad.

Official data on the roads in the 200 districts and municipalities where the survey was conducted shows that 27.47% of them are not asphalted. We can also see that the condition of the roads in these regions is not ideal. Only 37.59% of the roads are classified as good, while 28.59% are considered average and 33.83% are damaged or badly damaged.

If we examine the data on municipalities and districts separately, we can see that the road systems in municipalities tend to be of better quality, as well as more accessible, than those found in districts. 92.32% of the roads in the municipalities we surveyed are asphalted, while in the districts the figure is 66.94%. 62.59% of roads in the municipalities are in average condition, compared with 30.09% of the districts' roads. Conversely, only 12.60% of the municipalities' roads and 40.18% of the districts' roads are damaged or badly damaged.

These figures indicate that the condition of Indonesia's physical infrastructure – particularly roads, which constitute the main means of transportation that supports business activities – needs serious attention. If this situation is not addressed quickly, it will hamper operations in many regions, and also lower the country's investment attractiveness. Local governments, particularly in those areas that lack sufficient accessible roads, need to allocate funds in their budgets to expand their road systems, and to maintain existing roads.

### C.5.2 Listrik

Dilihat dari ketersediaan sebagian besar pelaku usaha menilai suplay listrik saat ini memadai (41,3% menilai memadai, 8,9% sangat memadai). Sementara yang menilai cukup memadai sebesar 32,4%. Sementara responden yang merasa bahwa suplay listrik kurang hingga sangat kurang memadai sebesar 20,7%, lebih besar dibandingkan dengan jumlah responden yang menilai ketersediaan jalan darat kurang dan sangat kurang. Dilihat dari kualitas sambungan listrik dilihat sebagian besar responden juga menilai baik (39,2%) dan sangat baik (6,7%). Sementara yang menilai sedang sebesar 32,9%, dan masih ada 21,2% responden yang menilai kualitas suplay listrik kurang baik dan sangat tidak baik. Kualitas suplay listrik yang kurang baik ini ditunjukkan dengan tegangan listrik yang tidak stabil dan bahkan sering terjadi pemadaman secara bergiliran. Kualitas sambungan listrik yang kurang baik ini, banyak diantara para pelaku usaha yang harus menyediakan sumber pembangkit listrik sendiri seperti generator. Namun demikian sebagian pelaku usaha mengaku bahwa untuk pembangkit listrik yang disediakan sendiri ini mereka juga harus membayar pajak kepada daerah berupa pajak penerangan jalan.

### C.5.3. Telpon

Diantara jenis-jenis infrastruktur pendukung kegiatan usaha, ketersediaan dan kualitas sambungan telpon merupakan infrastruktur yang paling banyak dikeluhkan oleh para pelaku usaha. Untuk ketersediaan jaringan telepon 23,8% responden menilai jaringan telpon kurang bahkan sangat kurang. Sementara 30,7% pelaku usaha menilai cukup dan 44,5% menilai memadai hingga sangat memadai. Responden yang menilai sambungan telpon memadai dan sangat memadai kebanyakan adalah para responden yang kegiatan usahanya di wilayah perkotaan. Sementara responden yang melakukan kegiatan usaha di daerah yang jauh dari perkotaan masih banyak yang mengeluhkan mengenai ketersediaan telpon. Hal ini menunjukkan bahwa masih banyak daerah-daerah yang belum terjangkau oleh sarana komunikasi ini. Jika dilihat dari kualitas sambungan telpon yang dilihat dari kejelasan suara kemudahan dalam melakukan sambungan pembicaraan, 21,3% responden menilai tidak baik hingga sangat tidak baik. Sementara yang menilai kualitas sambungan telpon cukup sebanyak 32%, dan yang menilai baik hingga sangat baik sebesar 46,8%.

### C.5.2. Electricity

A plurality of business operators (41.3%) say that the availability of electricity in their regions is good, while 8.9% think it is very good. 32.4% say the availability of electricity is fairly good, and 20.7% deem it inadequate; in other words, business people are more likely to feel that there is a problem with the availability of electrical power than with roads. When it comes to the quality of the electricity supply, 39.2% of respondents consider it to be good, and 6.7% believe it is very good. 32.9% see it as reasonable, while 21.2% say it is poor or very poor. Those who class the quality of the electricity supply as poor or very poor are often subjected to fluctuations in the power supply, as well as brownouts. This has forced many business operators to invest in their own power resources, such as generators. Even if they generate their own electricity, these business people also have to pay road lighting tax to the local government.

### C.5.3. The Telephone System

Of the different types of infrastructure required by business, the availability and quality of telephone lines cause the greatest problems. While 30.7% of respondents say that the availability of telephone lines is adequate and 44.5% state that it is good or very good, 23.8% of business people consider availability to be inadequate or very poor. It is primarily business operators in urban areas who deem telephone availability good or very good, whereas those who are unhappy with it tend to be running companies in locations that are far from urban areas. This shows that there are still many regions that do not have proper telecommunications coverage. The quality of telephone services can be measured by the clarity of the lines and the ease of connection. 21.3% of respondents consider the quality of telephone services to be inadequate or very bad. 32% think it is adequate, and 46.8% see it as good or very good.

# V. PENUTUP

## Closing

Daya tarik investasi suatu daerah tidak hanya ditentukan oleh potensi ekonomi berupa “anugerah alam” yang dimilikinya. Berbagai unsur lainnya juga mempengaruhi daya tarik investasi suatu daerah, seperti birokrasi pelayanan, keamanan, kondisi sosial budaya, tenaga kerja, dan sebagainya. Keseluruhan faktor tersebut tergabung menjadi satu dan membentuk daya tarik investasi bagi daerah yang bersangkutan. Permasalahan atau kelemahan di satu faktor, akan mempengaruhi daya tarik investasi secara keseluruhan. Temuan-temuan dalam penelitian ini menunjukkan pada kita bahwa meskipun secara rata-rata telah terjadi perbaikan dari sejumlah faktor pembentuk daya tarik investasi daerah, namun juga masih menyisakan beberapa persoalan. Kondisi tersebut tentunya sangat berpengaruh terhadap perkembangan investasi dan keberadaan dunia usaha di daerah dalam menjalankan kegiatannya.

### A. Kesimpulan

#### A.1. Peringkat Daya Tarik Investasi

- a) Tanpa merubah indikator dan bobot pemeringkatan dapat dilakukan perbandingan peringkat daerah dari tahun ke tahun, dan faktor-faktor yang menjadi penyebab perubahan tersebut.
- b) Selain perubahan score masing-masing indikator, variabel, dan faktor pemeringkatan, penambahan jumlah daerah yang diperingkat, juga menjadi salah satu penyebab perubahan peringkat daya tarik investasi daerah. Turun dan naiknya peringkat suatu daerah sangat dipengaruhi oleh perubahan yang terjadi pada

The investment attractiveness of a region is not only determined by its economic potential in the form of the “gifts of nature” it is blessed with. Various other elements, such as the quality of the civil service, security conditions, socio-cultural conditions and labor factors also play significant roles in shaping its appeal to investors. Problems or weaknesses in any one of these factors influence the region’s overall potential for attracting investment. The findings of this study show that although there have been improvements in a number of these elements, certain problems remain. These problems must also be addressed in order to safeguard the growth of investment and prosperity throughout Indonesia.

### A. Conclusions

#### A.1. Ranking of Investment Attractiveness

- a) As the indicators, variables and factors used in the rating, and to their respective weightings, have remained unaltered, it is possible to compare the scores of a given region from one year to the next on a like-for-like basis, and to identify the reasons for any changes that occur.
- b) Movements in the ranking of a given region are greatly influenced by changes to the Regulation & Government Service and Socio-Political factors, given that they have heavier weightings than the other three factors. Aside from changes in the scores for each of the indicators, variables and factors in the rating, the addition of a

faktor kelembangaan dan sosial politik yang mempunyai bobot lebih besar dibandingkan faktor-faktor lainnya.

- c) Rata-rata score total Daya Tarik Investasi Kabupaten pada pemeringkatan tahun 2003 lebih baik dibandingkan tahun 2002. Pada tahun 2002 rata-rata score kabupaten sebesar 0,1791, sementara untuk tahun 2003 sebesar 0,1828. Score tertinggi untuk tahun 2003 diraih oleh Kab. Purwakarta yakni sebesar 0,3273 lebih tinggi dibandingkan score tertinggi tahun sebelumnya yang diraih oleh Kab. Dairi yakni sebesar 0,2796. Hal ini menunjukkan adanya perbaikan daya tarik investasi kabupaten-kabupaten di Indonesia.
  - d) Rata-rata score total Daya Tarik Investasi Kota mengalami penurunan dari sebesar 0,2239 pada tahun 2002 menjadi 0,1945 pada tahun 2003. Pada tahun 2002 score tertinggi sebesar 0,3146 diraih oleh Kota Semarang, sementara untuk tahun 2003 score tertinggi diraih Kota Batam sebesar 0,2805. Penurunan score rata-rata yang diperoleh daerah-daerah kota di tahun 2003 mengindikasikan terjadi penurunan daya tarik investasi daerah-daerah Kota di Indonesia.
  - e) Perbandingan hasil pemeringkatan tahun 2002 dengan hasil tahun 2003 menunjukkan banyak daerah secara relatif bertahan pada kelompok peringkatnya (kelompok atas, menengah, dan bawah). Perubahan peringkat lebih banyak terjadi pada kelompok daerah peringkat atas dan kelompok daerah peringkat menengah. Beberapa daerah yang tahun 2002 berada pada kelompok menengah, pada tahun 2003 mampu naik peringkat ke kelompok peringkat atas, sebaliknya pada kelompok atas beberapa diantaranya mengalami penurunan ke kategori kelompok menengah. Pada kelompok daerah-daerah yang berada pada peringkat terbawah tidak menunjukkan adanya perubahan yang signifikan. Daerah-daerah yang berada di peringkat bawah pada rating 2002 sebagian besar belum mampu beranjak pada peringkat yang lebih baik.
  - f) Dibandingkan tahun 2002, pada tahun 2003 secara rata-rata terjadi kenaikan score untuk faktor Ekonomi Daerah, khususnya pada daerah Kota. Fenomena ini disebabkan terutama oleh kenaikan pada indikator Indeks Pembangunan Manusia (IPM). Hal ini berarti bahwa pada tahun 2003 ini rata-rata kualitas hidup masyarakat khususnya di perkotaan mengalami peningkatan dibandingkan dengan tahun sebelumnya.
- c) The average total score for the districts included in the 2003 rating increased to 0.1828, from the 0.1791 average recorded in 2002. With 0.3273, Purwakarta District receives the highest score in the 2003 general rating, beating the top district in 2002 (Dairi), which scored 0.2796. This suggests that there has been a general improvement in the investment attractiveness of districts in Indonesia.
  - d) In contrast, the average total score for municipalities fell from 0.2239 in 2002 to 0.1945 in 2003. In 2002, the highest score (0.3146) was given to Semarang, while in 2003, Batam leads the field with 0.2805. This indicates that, on the whole, municipalities in Indonesia have become less attractive to investors.
  - e) If we compare the results of the ratings for 2002 and 2003, we can see that many regions more or less maintain their relative positions in the rankings (top, middle or bottom). In particular, it appears to be difficult for the regions at the bottom of the ratings table to elevate themselves to higher positions, although, even here, there are some notable exceptions. Most of the movement has occurred in the high and middle ranks. Several districts and municipalities that were ranked around the middle of their respective tables in 2002 climb to high positions in 2003, while some previously top-ranked regions slip in the ratings.
  - f) Compared with 2002, the latest rating shows an overall improvement in scores for the Regional Economic Dynamism factor, particularly in municipalities. This phenomenon is attributable to an increase in Human Development Index (HDI) indicator scores, and points to a general improvement in the quality of life of Indonesians, especially those living in urban areas, in 2003.

## A.2. Iklim Investasi

- a) Secara umum kondisi sosial politik berbagai daerah di Indonesia, - dilihat dari keamanan, konflik sosial (bentrokan antar kampung, antar etnis, dan sebagainya), kondisi politik, dan aktivitas unjuk rasa - oleh para pelaku usaha dinilai relatif kondusif untuk investasi. Hanya sebagian kecil pelaku usaha yang merasa terganggu oleh kondisi sosial politik di berbagai daerah. Adanya sebagian kecil pelaku usaha yang menyatakan kondisi keamanan, politik dan gangguan sopol lain mengganggu kegiatan usaha mereka, menunjukkan bahwa hanya sebagian kecil daerah di Indonesia yang kurang kondusif untuk kegiatan usaha. Ada kecenderungan, semakin besar skala usaha seseorang, mempengaruhi penilaian mereka terhadap kondusifitas faktor Sosial Politik terhadap kegiatan usaha.
- b) Dari aspek budaya, masyarakat di daerah dinilai cukup terbuka terhadap kegiatan kegiatan usaha/investasi yang ada di daerahnya. Namun ada kecenderungan bahwa masyarakat di daerah kurang terbuka terhadap kegiatan usaha dari luar daerahnya. Para pelaku usaha merasa bahwa masyarakat lebih suka jika kegiatan usaha dilakukan oleh para pelaku usaha yang berasal dari daerahnya sendiri.
- c) Hasil survei terhadap pelaku usaha di 200 daerah maupun hasil kajian perda yang dilakukan oleh tim peneliti KPPOD, menunjukkan bahwa perda-perda atau kebijakan yang dikeluarkan oleh pemerintah daerah, cukup mendukung atau sekurangnya tidak menghambat kegiatan usaha. Namun demikian tidak dapat diabaikan bahwa dari kedua penelitian ini juga masih ditemukan perda-perda yang kurang/tidak mendukung kegiatan usaha sekitar (20-25%). Hal ini memperlihatkan bahwa masih cukup banyak daerah yang mengeluarkan perda-perda yang kontraproduktif terhadap kegiatan dunia usaha.
- d) Dilihat dari proses perumusan perda/kebijakan di berbagai daerah ternyata kurang melibatkan *stakeholders*-nya dalam hal ini para pelaku usaha. Hal tersebut barangkali yang menjadi salah satu penyebab munculnya perda-perda yang kontraproduktif terhadap kegiatan usaha di daerah.
- e) Pelayanan birokrasi yang dilakukan oleh aparat pemda dinilai oleh sebagian besar responden kurang baik. Hal ini tercermin dari rata-rata pelaku usaha yang merasa tidak puas terhadap

## A.2. The Investment Climate

- a) Most business people in Indonesia maintain that the socio-political conditions in their operating regions – security conditions, social conflicts (inter-village conflicts, ethnic wars, etc.), the political environment and strikes – are conducive to investment. The fact that only a relatively small number of business operators say they have problems with security, political and social conditions indicates that there are just a few areas in Indonesia where the environment is not so favorable for business. Large companies tend to be more exposed than their smaller counterparts to the effects of the socio-political conditions in their operating areas.
- b) Local communities are becoming more open towards business and investment activities in their areas. However, business people feel that local communities tend to be less welcoming of companies from other regions or countries, and that they prefer business activities to be run by local sons and daughters.
- c) In common with the textual study of local regulations conducted by the KPPOD research team, the survey conducted among business leaders in 200 regions shows that regulations and policies issued by local governments are sufficiently supportive of businesses, or that they at least do not hamper their activities. That said, these two studies also reveal that up to a third of regions have issued regulations that are considered detrimental to business operations.
- d) In the overwhelming majority of cases, the business community and other stakeholders are excluded from participating in the formulation of regional regulations and policies that have an impact on their activities. This perhaps explains why some regions are issuing regulations that are bad for business.
- e) Many business operators feel they obtain poor service from local government officials. This is reflected in the number of business people who feel dissatisfied with the clarity of service lines

pelayanan birokrasi oleh pemda, baik dari sisi kejelasan jalur birokrasi, ketepatan waktu pelayanan, dan besarnya biaya yang harus dikeluarkan untuk memperoleh pelayanan. Pelaku usaha yang paling banyak mengeluhkan birokrasi pelayanan oleh aparatur pemda adalah pelaku usaha pertambangan dan perkebunan.

- f) Untuk mendapatkan pelayanan birokrasi oleh aparat pemda, sebagian besar pelaku usaha di berbagai daerah (84.9%) mengaku harus mengeluarkan biaya tidak resmi diluar biaya yang seharusnya mereka bayar. Besarnya tambahan biaya tidak resmi tersebut rata-rata sebesar 60,62% dari biaya resmi yang seharusnya dikeluarkan.
  - g) Dalam melakukan kegiatan usaha, pelaku usaha harus mengeluarkan total biaya tambahan dari berbagai jenis pungutan tidak resmi rata-rata sebesar 2% dari total biaya produksi kegiatan usaha mereka. Pungutan tidak resmi tersebut dilakukan oleh aparat keamanan, kelompok masyarakat, kelompok pemuda, ormas, preman, dan lain-lain. Bahkan sebanyak 337 pelaku usaha mengaku bahwa seluruh pungutan-pungutan tidak resmi yang harus mereka keluarkan mencapai antara 8% s/d 10% dari biaya produksi mereka.
  - h) Biaya tidak resmi dalam proses peradilan merupakan biaya tidak resmi yang paling banyak dikeluhkan oleh para pelaku usaha yakni 13,1% responden, disusul biaya tidak resmi oleh aparat keamanan (11,5%), pungli oleh kelompok masyarakat (8,5%), dan terakhir pungli oleh preman sebanyak 6,1% dari responden, sisanya adalah biaya tidak resmi lainnya.
  - i) Bidang usaha kehutanan, agrobisnis (perkebunan dan pertanian pangan), dan pertambangan, merupakan bidang usaha yang rawan terhadap berbagai pungutan oleh banyak pihak. Hal itu terjadi karena bidang-bidang usaha tersebut dinilai oleh banyak kalangan sebagai usaha yang diuntungkan karena "anugerah alam". Dengan demikian siapa saja merasa punya hak untuk memiliki, menguasai, dan paling tidak berhak memperoleh manfaat dari keberadaan "anugerah" tersebut. Di sisi lain banyak kalangan juga merasa bahwa kehadiran kegiatan usaha tersebut kurang memberikan kontribusi yang cukup berarti bagi pemerintah daerah maupun bagi masyarakat sekitarnya. Hal-hal tersebut menjadi pendorong
- in local government offices, and with the punctuality and cost of service. Those who operate in the agro-industry and forestry sectors tend to be the most discontented with the quality of service from local government officials.
  - f) Most respondents (84.9%) acknowledge that they pay illegal charges on top of the official fees in order to obtain services from local government officials. On average, these additional unofficial charges amount to 60.62% of the official fees paid.
  - g) Typically, 2% of a company's total operating expenditure consists of illegal levies that have to be paid to local government officials, security officers, community groups, youth groups, mass organizations, gangsters and others. 7.3% of respondents say that illegal levies account for as much as 8% to 10% of their operating costs.
  - h) Illegal fees in the judicial process are seen as the most onerous (13.1% of respondents), followed by illegal fees imposed by security officers (11.5%), extortion by community groups (8.5%), and extortion by gangsters (6.1%).
  - i) Companies operating in the forestry, agro-industry (plantations and food crops) and mining sectors are the most prone to the imposition of various types of levies by many different parties. They are seen to be exploiting the "gifts of nature", which are commonly regarded as the property of the local people, who feel entitled to control and benefit from these resources. There is also a widespread perception that these firms are not making sufficient contributions to their respective local governments and communities. Thus, some members of the local community extract their "entitlement" from business operators in the form of unofficial fees and charges.



munculnya banyak pungutan terhadap kegiatan usaha ini.

- j) Para pelaku usaha yang memiliki skala usaha besar yang membutuhkan tenaga kerja banyak, cenderung mempunyai penilaian kurang baik terhadap kualitas tenaga kerja yang ada, dibandingkan dengan para pelaku usaha yang memiliki skala usaha kecil dan tenaga kerja sedikit. Dilihat dari sisi produktivitas tenaga kerja, ada indikasi bahwa tenaga kerja yang ada di berbagai daerah sekarang ini mendapat penilaian kurang produktif oleh perusahaan berskala besar dengan jumlah tenaga kerja banyak. Tenaga kerja di berbagai daerah masih kurang kompetitif/kurang siap untuk memasuki lapangan kerja yang *full skill*.
- k) Secara rata-rata ketersediaan infrastruktur fisik (jalan, listrik, telepon, dan lain-lain) di Indonesia cukup tersedia, namun ketersediaannya tidak merata ke seluruh penjuru tanah air. Data infrastruktur fisik 200 daerah Kabupaten dan Kota di Indonesia menunjukkan adanya kesenjangan ketersediaan dan kualitas infrastruktur fisik antar daerah. Hal ini didukung pula dari pernyataan banyak pelaku usaha yang menilai ketersediaan infrastruktur pendukung kegiatan usaha mereka kurang memadai. Kesenjangan tersebut terutama tampak jika diperbandingkan antara daerah kota dan kabupaten.
- l) Faktor geo-ekonomis sangat berpengaruh terhadap ketersediaan dan kualitas Infrastruktur Fisik suatu daerah. Daerah-daerah yang berada di sekitar pusat pertumbuhan ekonomi atau daerah penyangga kota-kota besar, mendapatkan *agglomeration effect* dari pusat-pusat pertumbuhan ekonomi, yang telah memiliki infrastruktur secara lengkap dan kualitasnya juga baik. Sebaliknya daerah-daerah secara geo-ekonomis berada jauh dari pusat pertumbuhan ekonomi kurang mendapat *agglomeration effect* (*share* infrastruktur). Daerah yang berada jauh dari pusat pertumbuhan ekonomi dan tidak dilewati jalur distribusi/perdagangan antar daerah, menjadi terpencil dan menjadi kurang berkembang karena infrastruktur fisik karena akses ke daerah lain tidak lancar.
- j) Leaders of large-scale enterprises that employ a large number of workers tend to be less satisfied than those who run smaller companies with the quality of the available labor force. Similarly, management of large operations rate the productivity of the available labor force less highly than their counterparts in smaller firms. This indicates that the workforce in a number of regions is uncompetitive and poorly equipped for jobs that require advanced skills.
- k) While the availability and quality of physical infrastructure (roads, electricity, telephone services, etc.) in Indonesia is generally considered to be adequate, there are considerable geographical differences. The disparity becomes obvious if we compare the responses given by business people in the municipalities surveyed with those obtained from the districts.
- l) Geo-economic factors have a significant impact on the availability and quality of physical infrastructure. Regions that lie close to centers of economic growth, and particularly those that act as buffer areas to large municipalities, enjoy a so-called agglomeration effect from the centers of economic growth and their superior infrastructure. Conversely, regions that are located far from the country's centers of economic growth, and/or away from inter-regional distribution and trade lines, become isolated and poorly developed because they lack access to adequate physical infrastructure.

## B. Saran

1. Bagi daerah-daerah yang mengalami penurunan peringkat daya tarik investasi, perlu mencermati dan mengevaluasi faktor-faktor

## B. Recommendations

1. The regions whose ratings have declined need to evaluate the factors that have caused their ratings to fall, and to make improvements

yang menjadi penyebab perubahan peringkatnya, agar dapat melakukan perbaikan. Bagi daerah-daerah yang berhasil memperoleh peringkat baik, perlu upaya secara terus menerus agar dapat mempertahankan dan meningkatkan daya tarik investasinya.

2. Perlu upaya-upaya serius dari para pihak, khususnya di daerah-daerah yang dirasakan kurang kondusif dari sosial politik (keamanan, konflik sosial, politik dan sebagainya), untuk segera memperbaiki kondisi sosial politik daerahnya. Harus ada upaya dari pihak-pihak yang berwenang untuk mensosialisasikan bahwa secara umum kondisi sosial politik di Indonesia terutama keamanan, cukup kondusif untuk melakukan investasi. Perlu adanya pemetaan daerah-daerah berdasarkan tingkat keamanannya agar tidak terjadi generalisasi terhadap kondisi keamanan Indonesia yang akan merugikan bagi upaya peningkatan investasi.
3. Perlu dilakukan upaya-upaya secara serius untuk memperbaiki kinerja aparatur pelayanan birokrasi di daerah (khususnya kepada dunia usaha). Perbaikan dapat dilakukan dengan restrukturisasi instansi pelayanan, misalnya dengan menerapkan sistem pelayanan satu atap dengan segala kewenangan yang menyertainya. Pemerintah pusat perlu membuat standar pelayanan birokrasi yang dapat dijadikan pedoman bagi daerah dalam melakukan pelayanan kepada masyarakat.
4. Pemerintah dari tingkat pusat hingga daerah harus mengupayakan pengurangan praktik-praktik pungutan liar yang dapat mengganggu kinerja dunia usaha terutama agar dunia usaha di Indonesia mampu menghadapi persaingan global. Hal ini juga dimaksudkan untuk meningkatkan daya saing dunia usaha Indonesia di tingkat internasional.
5. Pemerintah daerah harus lebih proaktif dan responsif terhadap keluhan dunia usaha atas banyaknya perda-perda yang mendistorsi kegiatan usaha mereka. Untuk menghindari pembuatan kebijakan yang berdampak negatif bagi kegiatan usaha, pemerintah daerah harus lebih transparan dan meningkatkan partisipasi publik dalam menyusun kebijakan daerah, yakni dengan melibatkan dunia usaha dan *stakeholders* lainnya.
6. Pemerintah daerah, perlu untuk mengalokasikan lebih besar dana APBD untuk membangun dan memelihara infrastruktur fisik di daerahnya. Perlu dipikirkan untuk

accordingly. Regions that have managed to obtain good ratings need to sustain their efforts to maintain and increase their investment attractiveness.

2. Concerted and focused efforts must be made to immediately improve socio-political conditions (security, social conflicts, political conflicts and similar concerns) in regions where these are seen as uncondusive to business operations. The relevant authorities must act to raise awareness of the fact that, in general, socio-political conditions in Indonesia – especially those related to security – are favorable for investment. There is a need to map the unsafe regions to avoid generalization about security conditions, which may harm investment promotion efforts throughout the country.
3. Serious efforts must also be made to improve the performance of local civil servants, especially in their dealings with the business community. The service agencies should be restructured, for instance by setting up one-stop service offices that have full authority to issue all permits and other documents needed by businesses. The central government also needs to establish service standards that can serve as guidelines for the regions.
4. Both the central government and local governments must reduce the practice of imposing levies that may hamper the performance of businesses, so that they can continue to compete in the global market. This will help to increase the attractiveness of Indonesia as an investment destination.
5. Local governments must be more proactive and responsive towards the concerns of business leaders regarding a number of local regulations that are distorting their operating environment. To avoid issuing policies that have a negative impact on business, local governments should be more transparent, and should encourage the participation of the the business community and other stakeholders in formulating local policies that affect their activities.
6. Local governments need to allocate more funds in their budgets to the development and maintenance of physical infrastructure in their regions. They also need to consider cooperating

melakukan kerjasama dengan daerah sekitarnya dalam rangka pengadaan dan pemeliharaan infrastruktur fisik, agar daerah-daerah semakin terintegrasi satu dengan lainnya sehingga terbentuk pusat-pusat pertumbuhan ekonomi baru yang dapat mengakselerasi pertumbuhan ekonomi masing-masing daerah.

with neighboring regions to provide and maintain physical infrastructure, with a view to establishing new centers of economic growth that will increase prosperity in the regions concerned.

Lampiran 1. Hasil Pemeringkatan  
 Lampiran 1.1. Peringkat Kabupaten  
 Lampiran 1.1.1. Peringkat Daya Tarik Investasi 156 Kabupaten di Indonesia

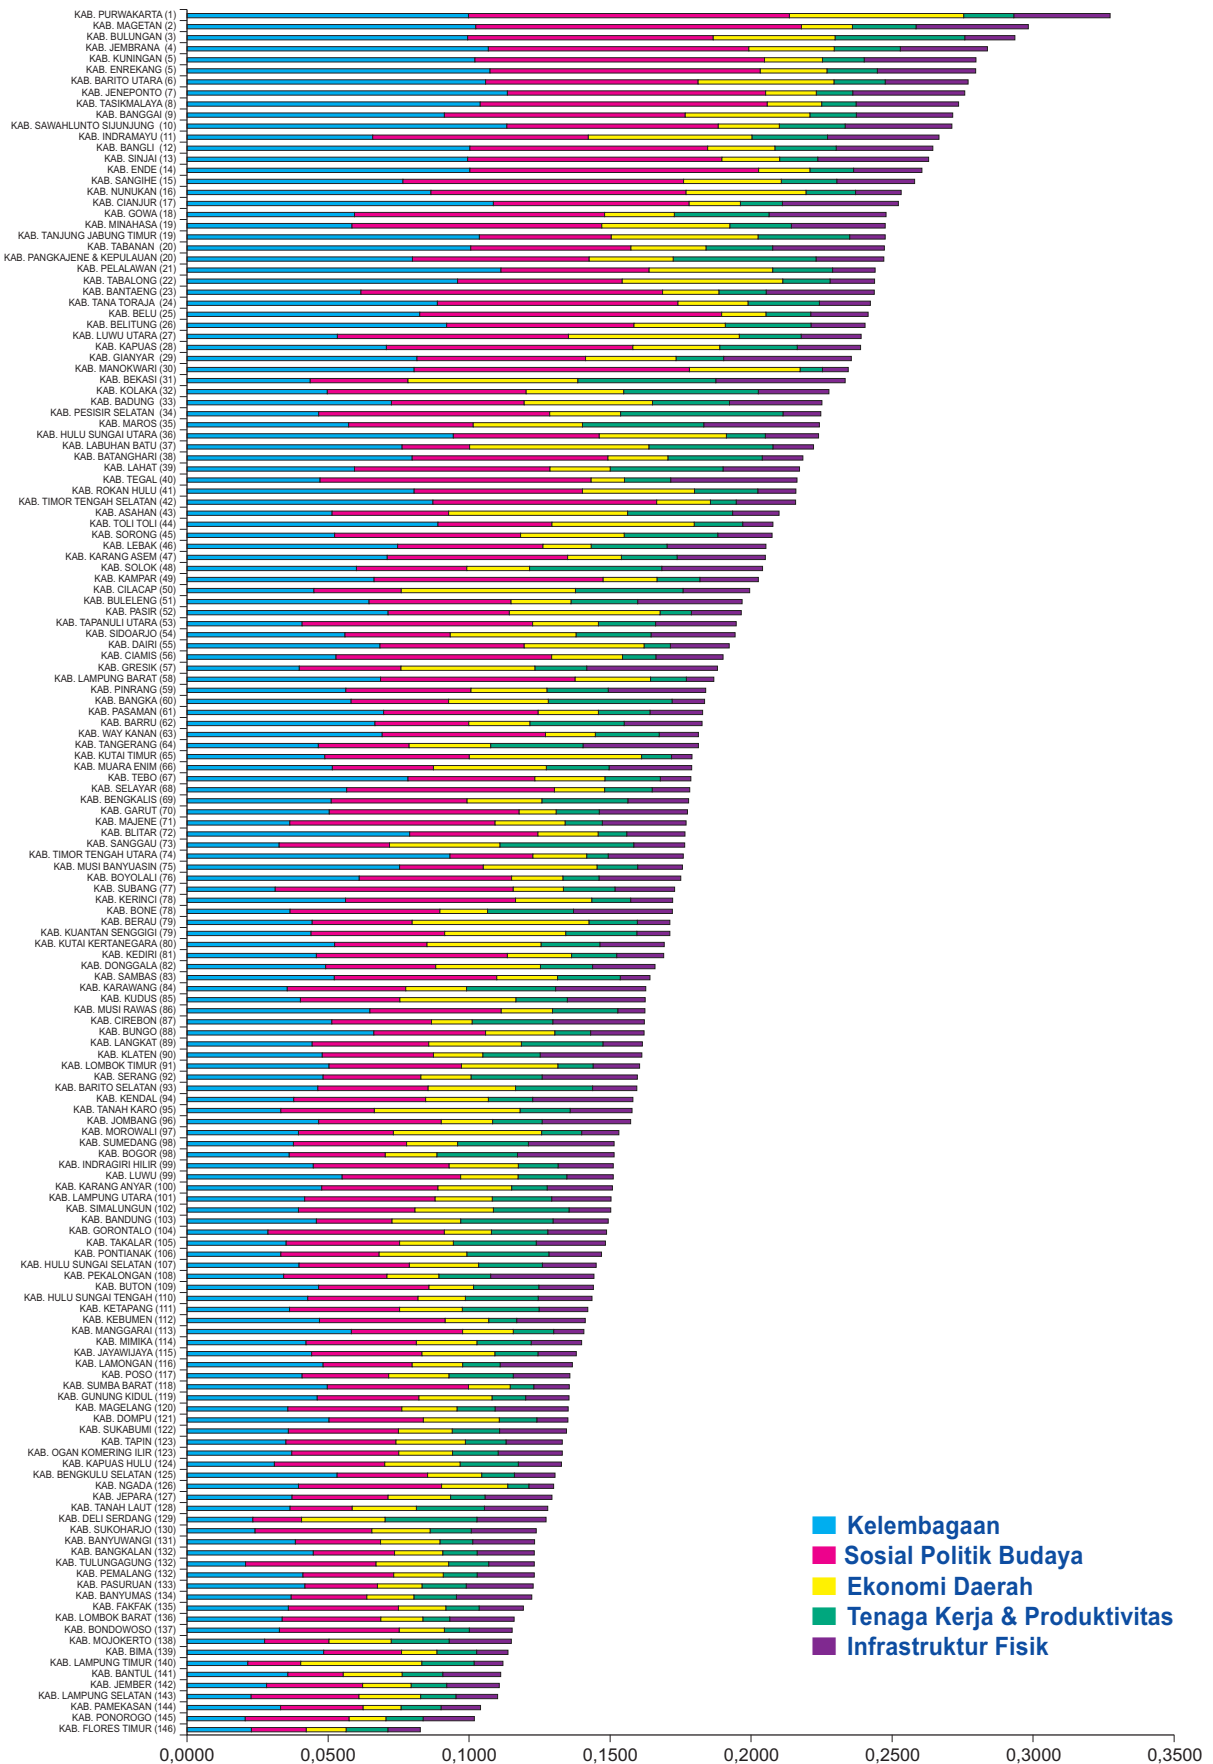

Lampiran 1.1.2. Neraca Peringkat Faktor dan Variabel Daya Tarik Investasi 156 Kabupaten di Indonesia

| No.              | Propinsi            | Kabupaten                 | PERINGKAT TIAP INDIKATOR, VARIABEL, FAKTOR DAN SECARA TOTAL |                      |       |                 |                 |                   |          |                |        |                      |                 |                  |               |                           |                    |                            |                    |                                  |                              |                           |  |  |
|------------------|---------------------|---------------------------|-------------------------------------------------------------|----------------------|-------|-----------------|-----------------|-------------------|----------|----------------|--------|----------------------|-----------------|------------------|---------------|---------------------------|--------------------|----------------------------|--------------------|----------------------------------|------------------------------|---------------------------|--|--|
|                  |                     |                           | TOTAL SCORE                                                 | Aparatur & Pelayanan | Perda | Keuangan Daerah | Kepastian Hukum | TOTAL KELEMBAGAAN | Keamanan | Sosial Politik | Budaya | TOTAL SOSIAL POLITIK | Potensi Ekonomi | Struktur Ekonomi | TOTAL EKONOMI | Ketersediaan Tenaga Kerja | Biaya Tenaga Kerja | Produktivitas Tenaga Kerja | TOTAL TENAGA KERJA | Ketersediaan Infrastruktur Fisik | Kualitas Infrastruktur Fisik | TOTAL INFRASTRUKTUR FISIK |  |  |
| Jumlah Peringkat |                     |                           | 146                                                         | 22                   | 3     | 53              | 61              | 138               | 48       | 63             | 69     | 130                  | 143             | 25               | 114           | 52                        | 17                 | 5                          | 117                | 92                               | 79                           | 124                       |  |  |
| 1                | JAWA BARAT          | PURWAKARTA (1)            | 1                                                           | 1                    | 1     | 8               | 16              | 14                | 1        | 11             | 3      | 2                    | 1               | 10               | 3             | 17                        | 15                 | 3                          | 70                 | 18                               | 17                           | 26                        |  |  |
| 2                | JAWA TIMUR          | MAGETAN (2)               | 2                                                           | 1                    | 3     | 46              | 1               | 10                | 1        | 11             | 1      | 1                    | 5               | 18               | 92            | 12                        | 4                  | 4                          | 45                 | 6                                | 13                           | 9                         |  |  |
| 3                | KALIMANTAN TIMUR    | BULUNGAN (3)              | 3                                                           | 2                    | 1     | 5               | 12              | 15                | 3        | 25             | 36     | 19                   | 9               | 15               | 22            | 15                        | 5                  | 1                          | 7                  | 55                               | 61                           | 87                        |  |  |
| 4                | BALI                | JEMBRANA (4)              | 4                                                           | 6                    | 1     | 16              | 1               | 6                 | 3        | 36             | 5      | 12                   | 16              | 9                | 44            | 23                        | 1                  | 5                          | 40                 | 25                               | 24                           | 34                        |  |  |
| 5                | SULAWESI SELATAN    | ENREKANG (5)              | 5                                                           | 2                    | 2     | 27              | 1               | 5                 | 3        | 9              | 24     | 11                   | 18              | 12               | 64            | 17                        | 8                  | 4                          | 69                 | 19                               | 13                           | 24                        |  |  |
| 6                | JAWA BARAT          | KUNINGAN (5)              | 5                                                           | 3                    | 1     | 22              | 2               | 11                | 1        | 40             | 8      | 5                    | 14              | 11               | 78            | 13                        | 13                 | 5                          | 88                 | 5                                | 16                           | 11                        |  |  |
| 7                | KALIMANTAN TENGAH   | BARITO UTARA (6)          | 6                                                           | 4                    | 2     | 20              | 1               | 7                 | 9        | 32             | 31     | 29                   | 13              | 12               | 14            | 42                        | 8                  | 3                          | 68                 | 31                               | 25                           | 38                        |  |  |
| 8                | SULAWESI SELATAN    | JENEPONTO (7)             | 7                                                           | 1                    | 1     | 17              | 2               | 1                 | 5        | 18             | 3      | 13                   | 25              | 12               | 93            | 48                        | 7                  | 5                          | 96                 | 9                                | 5                            | 10                        |  |  |
| 9                | JAWA BARAT          | TASIKMALAYA (8)           | 8                                                           | 2                    | 2     | 36              | 1               | 8                 | 1        | 47             | 4      | 7                    | 15              | 19               | 84            | 24                        | 13                 | 5                          | 101                | 12                               | 11                           | 18                        |  |  |
| 10               | SULAWESI TENGAH     | BANGGAI (9)               | 9                                                           | 5                    | 2     | 27              | 5               | 20                | 9        | 11             | 20     | 20                   | 10              | 4                | 20            | 31                        | 7                  | 4                          | 77                 | 22                               | 12                           | 26                        |  |  |
| 11               | SUMATERA BARAT      | SAWAHLUNTO SIJUNJUNG (10) | 10                                                          | 1                    | 2     | 27              | 1               | 2                 | 13       | 41             | 1      | 30                   | 39              | 18               | 70            | 31                        | 1                  | 4                          | 41                 | 16                               | 5                            | 15                        |  |  |
| 12               | JAWA BARAT          | INDRAMAYU (11)            | 11                                                          | 6                    | 3     | 41              | 22              | 47                | 7        | 35             | 41     | 28                   | 6               | 7                | 7             | 33                        | 1                  | 3                          | 32                 | 20                               | 1                            | 12                        |  |  |
| 13               | BALI                | BANGLI (12)               | 12                                                          | 6                    | 2     | 29              | 1               | 13                | 3        | 63             | 3      | 23                   | 27              | 11               | 63            | 34                        | 1                  | 5                          | 49                 | 24                               | 10                           | 26                        |  |  |
| 14               | SULAWESI SELATAN    | SINJAI (13)               | 13                                                          | 2                    | 2     | 34              | 2               | 15                | 2        | 50             | 6      | 15                   | 24              | 12               | 79            | 45                        | 7                  | 5                          | 93                 | 10                               | 5                            | 13                        |  |  |
| 15               | NUSA TENGGARA TIMUR | ENDE (14)                 | 14                                                          | 6                    | 2     | 29              | 1               | 13                | 3        | 8              | 3      | 6                    | 17              | 11               | 92            | 48                        | 4                  | 5                          | 83                 | 46                               | 30                           | 51                        |  |  |
| 16               | SULAWESI UTARA      | SANGIHE (15)              | 15                                                          | 6                    | 3     | 53              | 5               | 31                | 1        | 19             | 41     | 8                    | 8               | 5                | 35            | 29                        | 3                  | 4                          | 60                 | 45                               | 20                           | 42                        |  |  |
| 17               | KALIMANTAN TIMUR    | NUNUKAN (16)              | 16                                                          | 2                    | 3     | 40              | 8               | 24                | 6        | 24             | 2      | 14                   | 7               | 15               | 24            | 33                        | 5                  | 5                          | 72                 | 70                               | 54                           | 92                        |  |  |
| 18               | JAWA BARAT          | CIANJUR (17)              | 17                                                          | 1                    | 2     | 27              | 2               | 4                 | 20       | 8              | 7      | 34                   | 57              | 22               | 91            | 13                        | 12                 | 5                          | 87                 | 7                                | 6                            | 6                         |  |  |
| 19               | SULAWESI SELATAN    | GOWA (18)                 | 18                                                          | 15                   | 1     | 6               | 33              | 53                | 3        | 42             | 14     | 16                   | 22              | 5                | 60            | 1                         | 1                  | 4                          | 14                 | 8                                | 3                            | 5                         |  |  |
| 20               | JAMBI               | TANJUNG JABUNG TIMUR (19) | 19                                                          | 1                    | 2     | 25              | 6               | 9                 | 25       | 38             | 41     | 67                   | 38              | 15               | 11            | 6                         | 2                  | 3                          | 19                 | 79                               | 71                           | 110                       |  |  |
| 21               | SULAWESI UTARA      | MINAHASA (19)             | 19                                                          | 16                   | 2     | 30              | 18              | 54                | 8        | 16             | 3      | 17                   | 4               | 18               | 17            | 16                        | 3                  | 4                          | 48                 | 24                               | 15                           | 28                        |  |  |
| 22               | BALI                | TABANAN (20)              | 20                                                          | 7                    | 1     | 6               | 2               | 12                | 21       | 25             | 30     | 50                   | 66              | 11               | 52            | 22                        | 1                  | 5                          | 39                 | 18                               | 2                            | 11                        |  |  |
| 23               | SULAWESI SELATAN    | PANGKAJENE & KEP. (20)    | 20                                                          | 9                    | 2     | 7               | 15              | 28                | 12       | 61             | 17     | 42                   | 51              | 16               | 45            | 1                         | 8                  | 1                          | 2                  | 43                               | 33                           | 52                        |  |  |
| 24               | RIAU                | PELALAWAN (21)            | 21                                                          | 3                    | 2     | 4               | 2               | 3                 | 28       | 27             | 3      | 54                   | 46              | 7                | 21            | 38                        | 1                  | 5                          | 51                 | 73                               | 62                           | 99                        |  |  |
| 25               | KALIMANTAN SELATAN  | TABALONG (22)             | 22                                                          | 7                    | 2     | 11              | 4               | 16                | 21       | 15             | 38     | 47                   | 20              | 17               | 8             | 28                        | 7                  | 4                          | 75                 | 68                               | 60                           | 93                        |  |  |
| 26               | SULAWESI SELATAN    | BANTAENG (23)             | 23                                                          | 9                    | 2     | 28              | 24              | 50                | 1        | 25             | 7      | 4                    | 11              | 12               | 82            | 29                        | 7                  | 4                          | 76                 | 14                               | 5                            | 14                        |  |  |
| 27               | SULAWESI SELATAN    | TANA TORAJA (24)          | 24                                                          | 1                    | 2     | 27              | 19              | 22                | 7        | 10             | 39     | 21                   | 26              | 5                | 60            | 17                        | 1                  | 4                          | 34                 | 61                               | 51                           | 84                        |  |  |
| 28               | NUSA TENGGARA TIMUR | BELU (25)                 | 25                                                          | 6                    | 3     | 41              | 7               | 25                | 1        | 2              | 55     | 3                    | 12              | 22               | 104           | 46                        | 4                  | 5                          | 81                 | 55                               | 39                           | 71                        |  |  |
| 29               | BANGKA BELITUNG     | BELITUNG (26)             | 26                                                          | 8                    | 1     | 2               | 10              | 19                | 9        | 55             | 41     | 39                   | 36              | 18               | 39            | 15                        | 6                  | 2                          | 23                 | 42                               | 67                           | 79                        |  |  |
| 30               | SULAWESI SELATAN    | LUWU UTARA (27)           | 27                                                          | 17                   | 3     | 32              | 21              | 63                | 13       | 15             | 1      | 24                   | 2               | 17               | 5             | 20                        | 7                  | 3                          | 48                 | 77                               | 26                           | 66                        |  |  |
| 31               | KALIMANTAN TENGAH   | KAPUAS (28)               | 28                                                          | 6                    | 3     | 44              | 15              | 38                | 4        | 23             | 34     | 18                   | 19              | 5                | 43            | 27                        | 1                  | 3                          | 28                 | 53                               | 31                           | 61                        |  |  |
| 32               | BALI                | GIANYAR (29)              | 29                                                          | 6                    | 2     | 7               | 23              | 26                | 12       | 52             | 41     | 45                   | 50              | 19               | 40            | 22                        | 7                  | 5                          | 75                 | 4                                | 2                            | 3                         |  |  |
| 33               | PAPUA               | MANOKWARI (30)            | 30                                                          | 3                    | 3     | 40              | 11              | 27                | 1        | 32             | 37     | 9                    | 3               | 4                | 29            | 51                        | 17                 | 4                          | 115                | 85                               | 78                           | 122                       |  |  |
| 34               | JAWA BARAT          | BEKASI (31)               | 31                                                          | 15                   | 3     | 39              | 33              | 94                | 44       | 25             | 29     | 100                  | 44              | 19               | 6             | 8                         | 5                  | 1                          | 3                  | 3                                | 1                            | 2                         |  |  |
| 35               | SULAWESI TENGGARA   | KOLAKA (32)               | 32                                                          | 15                   | 3     | 41              | 23              | 74                | 9        | 39             | 50     | 33                   | 31              | 4                | 36            | 31                        | 1                  | 1                          | 4                  | 36                               | 34                           | 48                        |  |  |
| 36               | BALI                | BADUNG (33)               | 33                                                          | 8                    | 2     | 4               | 30              | 35                | 21       | 57             | 32     | 65                   | 47              | 23               | 16            | 10                        | 1                  | 4                          | 29                 | 17                               | 24                           | 29                        |  |  |
| 37               | SUMATERA BARAT      | PESISIR SELATAN (34)      | 34                                                          | 10                   | 3     | 52              | 24              | 83                | 2        | 56             | 30     | 24                   | 28              | 3                | 58            | 3                         | 1                  | 1                          | 1                  | 87                               | 54                           | 107                       |  |  |
| 38               | SULAWESI SELATAN    | MAROS (35)                | 35                                                          | 10                   | 2     | 21              | 33              | 57                | 21       | 56             | 48     | 75                   | 60              | 25               | 31            | 17                        | 7                  | 1                          | 10                 | 10                               | 3                            | 7                         |  |  |
| 39               | KALIMANTAN SELATAN  | HULU SUNGAI UTARA (36)    | 36                                                          | 9                    | 1     | 13              | 2               | 17                | 28       | 15             | 19     | 55                   | 41              | 12               | 18            | 44                        | 6                  | 5                          | 92                 | 60                               | 46                           | 81                        |  |  |
| 40               | SUMATERA UTARA      | LABUHAN BATU (37)         | 37                                                          | 14                   | 2     | 21              | 9               | 32                | 45       | 50             | 41     | 124                  | 62              | 2                | 1             | 25                        | 5                  | 1                          | 8                  | 81                               | 57                           | 102                       |  |  |
| 41               | J A M B I           | BATANGHARI (38)           | 38                                                          | 2                    | 2     | 31              | 20              | 28                | 13       | 13             | 49     | 34                   | 53              | 18               | 73            | 17                        | 2                  | 2                          | 15                 | 62                               | 72                           | 102                       |  |  |
| 42               | SUMATERA SELATAN    | LAHAT (39)                | 39                                                          | 15                   | 1     | 15              | 27              | 53                | 14       | 35             | 12     | 35                   | 54              | 18               | 73            | 38                        | 6                  | 1                          | 11                 | 44                               | 22                           | 43                        |  |  |
| 43               | JAWA TENGAH         | TEGAL (40)                | 40                                                          | 15                   | 2     | 32              | 33              | 81                | 2        | 14             | 23     | 10                   | 23              | 24               | 114           | 14                        | 10                 | 4                          | 78                 | 1                                | 5                            | 4                         |  |  |
| 44               | RIAU                | ROKAN HULLU (41)          | 41                                                          | 3                    | 2     | 26              | 18              | 27                | 23       | 6              | 40     | 46                   | 37              | 12               | 28            | 36                        | 1                  | 4                          | 46                 | 85                               | 58                           | 106                       |  |  |
| 45               | NUSA TENGGARA TIMUR | TIMOR TENGAH SEL. (42)    | 42                                                          | 8                    | 2     | 28              | 3               | 23                | 10       | 2              | 57     | 27                   | 40              | 5                | 86            | 47                        | 16                 | 4                          | 112                | 63                               | 30                           | 68                        |  |  |
| 46               | SUMATERA UTARA      | ASAHAN (43)               | 43                                                          | 22                   | 1     | 1               | 46              | 68                | 36       | 11             | 43     | 81                   | 33              | 2                | 1             | 25                        | 15                 | 1                          | 13                 | 59                               | 67                           | 91                        |  |  |
| 47               | SULAWESI TENGAH     | TOLI TOLI (44)            | 44                                                          | 10                   | 2     | 11              | 4               | 21                | 37       | 12             | 41     | 82                   | 58              | 5                | 13            | 25                        | 7                  | 4                          | 73                 | 83                               | 73                           | 117                       |  |  |
| 48               | PAPUA               | SORONG (45)               | 45                                                          | 15                   | 2     | 34              | 25              | 66                | 15       | 11             | 54     | 40                   | 32              | 15               | 33            | 48                        | 17                 | 1                          | 16                 | 48                               | 56                           | 79                        |  |  |
| 49               | BANTEN              | LEBAK (46)                | 46                                                          | 9                    | 2     | 34              | 8               | 34                | 19       | 46             | 38     | 56                   | 84              | 22               | 99            | 14                        | 11                 | 2                          | 31                 | 22                               | 9                            | 23                        |  |  |
| 50               | BALI                | KARANG ASEM (47)          | 47                                                          | 8                    | 3     | 32              | 15              | 37                | 19       | 25             | 9      | 41                   | 67              | 14               | 86            | 47                        | 1                  | 5                          | 59                 | 29                               | 18                           | 33                        |  |  |
| 51               | SUMATERA BARAT      | SOLOK (48)                | 48                                                          | 15                   | 1     | 13              | 28              | 52                | 37       | 7              | 65     | 87                   | 102             | 18               | 67            | 37                        | 1                  | 1                          | 6                  | 26                               | 5                            | 20                        |  |  |
| 52               | R I A U             | KAMPAR (49)               | 49                                                          | 15                   | 2     | 20              | 17              | 45                | 8        | 44             | 3      | 26                   | 34              | 12               | 86            | 29                        | 8                  | 5                          | 85                 | 50                               | 41                           | 70                        |  |  |
| 53               | JAWA TENGAH         | CILACAP (50)              | 50                                                          | 15                   | 2     | 23              | 47              | 89                | 44       | 25             | 45     | 114                  | 52              | 10               | 3             | 29                        | 10                 | 1                          | 12                 | 40                               | 38                           | 54                        |  |  |
| 54               | BALI                | BULELENG (51)             | 51                                                          | 15                   | 2     | 24              | 17              | 49                | 28       | 4              | 46     | 60                   | 79              | 21               | 74            | 27                        | 1                  | 4                          | 38                 | 22                               | 4                            | 16                        |  |  |
| 55               | KALIMANTAN TIMUR    | PASIR (52)                | 52                                                          | 12                   | 1     | 3               | 27              | 36                | 28       | 20             | 49     | 77                   | 45              | 7                | 9             | 37                        | 15                 | 4                          | 106                | 72                               | 42                           | 88                        |  |  |
| 56               | SUMATERA UTARA      | TAPANULI UTARA (53)       | 53                                                          | 21                   | 2     | 34              | 32              | 99                | 3        | 58             | 21     | 25                   | 30              | 5                | 65            | 21                        | 5                  | 4                          | 57                 | 39                               | 19                           | 41                        |  |  |
| 57               | JAWA TIMUR          | SIDOARJO (54)             | 54                                                          | 9                    | 1     | 13              | 48              | 61                | 28       | 60             | 22     | 90                   | 69              | 10               | 19            | 10                        | 5                  | 3                          | 32                 | 28                               | 26                           | 36                        |  |  |

| No.              | Propinsi            | Kabupaten               | PERINGKAT TIAP INDIKATOR, VARIABEL, FAKTOR DAN SECARA TOTAL |                      |   |       |                 |     |                 |                   |    |          |                |        |                      |    |                 |                  |               |    |                           |                    |                            |                    |  |                                  |
|------------------|---------------------|-------------------------|-------------------------------------------------------------|----------------------|---|-------|-----------------|-----|-----------------|-------------------|----|----------|----------------|--------|----------------------|----|-----------------|------------------|---------------|----|---------------------------|--------------------|----------------------------|--------------------|--|----------------------------------|
|                  |                     |                         | TOTAL SCORE                                                 | Aparatur & Pelayanan |   | Perda | Keuangan Daerah |     | Kepastian Hukum | TOTAL KELEMBAGAAN |    | Keamanan | Sosial Politik | Budaya | TOTAL SOSIAL POLITIK |    | Potensi Ekonomi | Struktur Ekonomi | TOTAL EKONOMI |    | Ketersediaan Tenaga Kerja | Biaya Tenaga Kerja | Produktivitas Tenaga Kerja | TOTAL TENAGA KERJA |  | Ketersediaan Infrastruktur Fisik |
| Jumlah Peringkat |                     |                         | 146                                                         | 22                   | 3 | 53    | 61              | 138 | 48              | 63                | 69 | 130      | 143            | 25     | 114                  | 52 | 17              | 5                | 117           | 92 | 79                        | 124                |                            |                    |  |                                  |
| 58               | SUMATERA UTARA      | DAIRI (55)              | 55                                                          | 8                    | 2 | 32    | 18              | 43  | 16              | 58                | 44 | 58       | 48             | 15     | 24                   | 43 | 14              | 5                | 111           | 46 | 50                        | 70                 |                            |                    |  |                                  |
| 59               | JAWA BARAT          | CIAMIS (56)             | 56                                                          | 15                   | 2 | 38    | 22              | 65  | 9               | 33                | 25 | 28       | 35             | 3      | 59                   | 28 | 12              | 5                | 104           | 59 | 27                        | 53                 |                            |                    |  |                                  |
| 60               | JAWA TIMUR          | GRESIK (57)             | 57                                                          | 19                   | 3 | 33    | 36              | 101 | 47              | 6                 | 46 | 93       | 64             | 17     | 15                   | 15 | 15              | 3                | 65            | 2  | 3                         | 1                  |                            |                    |  |                                  |
| 61               | LAMPUNG             | LAMPUNG BARAT (58)      | 58                                                          | 15                   | 2 | 18    | 15              | 42  | 11              | 26                | 41 | 36       | 43             | 15     | 51                   | 27 | 13              | 4                | 97            | 91 | 67                        | 120                |                            |                    |  |                                  |
| 62               | SULAWESI SELATAN    | PINRANG (59)            | 59                                                          | 14                   | 2 | 27    | 27              | 59  | 30              | 22                | 26 | 74       | 83             | 12     | 50                   | 17 | 8               | 3                | 50            | 31 | 5                         | 25                 |                            |                    |  |                                  |
| 63               | BANGKA BELITUNG     | BANGKA (60)             | 60                                                          | 11                   | 2 | 18    | 33              | 56  | 35              | 21                | 68 | 101      | 91             | 2      | 34                   | 52 | 1               | 1                | 9             | 76 | 75                        | 113                |                            |                    |  |                                  |
| 64               | SUMATERA BARAT      | PASAMAN (61)            | 61                                                          | 9                    | 2 | 32    | 13              | 40  | 27              | 19                | 13 | 51       | 71             | 22     | 72                   | 20 | 6               | 4                | 67            | 71 | 38                        | 82                 |                            |                    |  |                                  |
| 65               | SULAWESI SELATAN    | BARRU (62)              | 62                                                          | 9                    | 1 | 10    | 30              | 44  | 28              | 55                | 52 | 107      | 123            | 5      | 70                   | 1  | 1               | 4                | 14            | 30 | 29                        | 42                 |                            |                    |  |                                  |
| 66               | BANTEN              | TANGERANG (63)          | 63                                                          | 19                   | 1 | 6     | 53              | 84  | 29              | 53                | 53 | 111      | 104            | 17     | 47                   | 1  | 5               | 3                | 17            | 13 | 1                         | 8                  |                            |                    |  |                                  |
| 67               | KALIMANTAN TIMUR    | KUTAI TIMUR (64)        | 64                                                          | 14                   | 3 | 35    | 33              | 76  | 22              | 25                | 51 | 57       | 21             | 15     | 4                    | 29 | 17              | 5                | 107           | 92 | 74                        | 124                |                            |                    |  |                                  |
| 68               | SUMATERA SELATAN    | MUARA ENIM (65)         | 65                                                          | 16                   | 2 | 11    | 40              | 67  | 43              | 35                | 16 | 95       | 73             | 17     | 27                   | 38 | 1               | 4                | 47            | 34 | 22                        | 39                 |                            |                    |  |                                  |
| 69               | JAMBI               | TEBO (66)               | 66                                                          | 9                    | 2 | 26    | 8               | 30  | 28              | 37                | 21 | 72       | 89             | 5      | 60                   | 27 | 2               | 5                | 61            | 88 | 71                        | 116                |                            |                    |  |                                  |
| 70               | SULAWESI SELATAN    | SELAYAR (67)            | 67                                                          | 9                    | 2 | 25    | 34              | 58  | 14              | 15                | 18 | 31       | 49             | 22     | 96                   | 28 | 6               | 4                | 74            | 79 | 69                        | 108                |                            |                    |  |                                  |
| 71               | R I A U             | BENGKALIS (68)          | 68                                                          | 19                   | 2 | 4     | 42              | 70  | 28              | 3                 | 65 | 62       | 80             | 3      | 53                   | 7  | 1               | 4                | 21            | 56 | 35                        | 65                 |                            |                    |  |                                  |
| 72               | JAWA BARAT          | GARUT (69)              | 69                                                          | 15                   | 2 | 30    | 30              | 71  | 18              | 19                | 10 | 38       | 68             | 22     | 111                  | 14 | 13              | 4                | 84            | 35 | 11                        | 33                 |                            |                    |  |                                  |
| 73               | SULAWESI SELATAN    | MAJENE (70)             | 70                                                          | 12                   | 3 | 47    | 44              | 112 | 13              | 44                | 2  | 32       | 42             | 5      | 60                   | 51 | 6               | 4                | 95            | 31 | 23                        | 37                 |                            |                    |  |                                  |
| 74               | JAWA TIMUR          | BLITAR (71)             | 71                                                          | 7                    | 3 | 47    | 2               | 29  | 28              | 32                | 23 | 71       | 87             | 22     | 72                   | 40 | 12              | 5                | 108           | 47 | 46                        | 72                 |                            |                    |  |                                  |
| 75               | KALIMANTAN BARAT    | SANGGAU (72)            | 72                                                          | 16                   | 3 | 45    | 41              | 125 | 36              | 11                | 62 | 87       | 72             | 13     | 30                   | 33 | 1               | 1                | 5             | 66 | 44                        | 85                 |                            |                    |  |                                  |
| 76               | NUSA TENGGARA TIMUR | TIMOR TENGAH UTARA (73) | 73                                                          | 6                    | 2 | 28    | 4               | 18  | 48              | 14                | 66 | 118      | 134            | 5      | 86                   | 52 | 12              | 5                | 116           | 56 | 16                        | 45                 |                            |                    |  |                                  |
| 77               | SUMATERA SELATAN    | MUSI BANYUASIN (74)     | 74                                                          | 9                    | 2 | 4     | 22              | 33  | 41              | 28                | 63 | 117      | 85             | 15     | 26                   | 45 | 7               | 4                | 90            | 69 | 59                        | 93                 |                            |                    |  |                                  |
| 78               | JAWA TENGAH         | BOYOLALI (75)           | 75                                                          | 8                    | 2 | 38    | 23              | 51  | 15              | 54                | 42 | 52       | 81             | 18     | 92                   | 27 | 10              | 5                | 96            | 27 | 28                        | 40                 |                            |                    |  |                                  |
| 79               | LAMPUNG             | WAY KANAN (76)          | 76                                                          | 8                    | 2 | 20    | 23              | 41  | 16              | 57                | 15 | 48       | 76             | 12     | 96                   | 33 | 4               | 5                | 80            | 84 | 55                        | 104                |                            |                    |  |                                  |
| 80               | JAWA BARAT          | SUBANG (77)             | 77                                                          | 15                   | 3 | 50    | 41              | 126 | 3               | 35                | 38 | 22       | 29             | 22     | 96                   | 19 | 6               | 4                | 66            | 30 | 70                        | 67                 |                            |                    |  |                                  |
| 81               | J A M B I           | KERINCI (78)            | 78                                                          | 15                   | 1 | 13    | 33              | 60  | 26              | 4                 | 22 | 44       | 59             | 11     | 49                   | 27 | 10              | 4                | 92            | 71 | 65                        | 100                |                            |                    |  |                                  |
| 82               | SULAWESI SELATAN    | BONE (78)               | 78                                                          | 15                   | 2 | 38    | 52              | 110 | 28              | 7                 | 27 | 53       | 86             | 12     | 100                  | 13 | 1               | 3                | 22            | 15 | 14                        | 22                 |                            |                    |  |                                  |
| 83               | RIAU                | KUANTAN SENGGIGI (79)   | 79                                                          | 16                   | 2 | 26    | 39              | 93  | 25              | 31                | 49 | 64       | 56             | 12     | 23                   | 17 | 1               | 4                | 34            | 91 | 51                        | 111                |                            |                    |  |                                  |
| 84               | KALIMANTAN TIMUR    | BERAU (79)              | 79                                                          | 16                   | 2 | 14    | 59              | 91  | 44              | 6                 | 68 | 96       | 41             | 4      | 2                    | 17 | 17              | 3                | 73            | 86 | 70                        | 112                |                            |                    |  |                                  |
| 85               | KALIMANTAN TIMUR    | KUTAI KERTANEGARA (80)  | 80                                                          | 9                    | 3 | 35    | 33              | 66  | 48              | 16                | 36 | 109      | 79             | 15     | 26                   | 8  | 17              | 3                | 53            | 46 | 38                        | 58                 |                            |                    |  |                                  |
| 86               | JAWA TIMUR          | KEDIRI (81)             | 81                                                          | 11                   | 2 | 29    | 49              | 88  | 25              | 9                 | 1  | 37       | 55             | 18     | 66                   | 27 | 7               | 5                | 80            | 69 | 51                        | 90                 |                            |                    |  |                                  |
| 87               | SULAWESI TENGAH     | DONGGALA (82)           | 82                                                          | 13                   | 2 | 24    | 41              | 75  | 36              | 11                | 62 | 87       | 75             | 12     | 32                   | 17 | 7               | 4                | 64            | 55 | 32                        | 62                 |                            |                    |  |                                  |
| 88               | KALIMANTAN BARAT    | SAMBAS (83)             | 83                                                          | 14                   | 2 | 27    | 33              | 66  | 21              | 18                | 33 | 49       | 70             | 18     | 70                   | 38 | 1               | 4                | 47            | 89 | 68                        | 118                |                            |                    |  |                                  |
| 89               | JAWA BARAT          | KARAWANG (84)           | 84                                                          | 15                   | 3 | 45    | 38              | 117 | 36              | 3                 | 62 | 79       | 96             | 20     | 70                   | 4  | 5               | 3                | 20            | 23 | 21                        | 31                 |                            |                    |  |                                  |
| 90               | JAWA TENGAH         | KUDUS (85)              | 85                                                          | 16                   | 2 | 32    | 44              | 100 | 30              | 49                | 32 | 97       | 74             | 10     | 25                   | 23 | 10              | 3                | 67            | 30 | 29                        | 42                 |                            |                    |  |                                  |
| 91               | SUMATERA SELATAN    | MUSI RAWAS (86)         | 86                                                          | 12                   | 1 | 9     | 29              | 48  | 28              | 23                | 28 | 68       | 96             | 15     | 90                   | 32 | 1               | 4                | 42            | 91 | 69                        | 121                |                            |                    |  |                                  |
| 92               | JAWA BARAT          | CIREBON (87)            | 87                                                          | 9                    | 3 | 41    | 30              | 69  | 31              | 40                | 41 | 96       | 129            | 18     | 108                  | 6  | 2               | 4                | 27            | 15 | 27                        | 30                 |                            |                    |  |                                  |
| 93               | J A M B I           | BUNGO (88)              | 88                                                          | 6                    | 3 | 51    | 15              | 46  | 28              | 40                | 41 | 85       | 92             | 22     | 61                   | 35 | 10              | 4                | 97            | 64 | 40                        | 81                 |                            |                    |  |                                  |
| 94               | SUMATERA UTARA      | LANGKAT (89)            | 89                                                          | 22                   | 2 | 11    | 46              | 91  | 36              | 11                | 43 | 81       | 78             | 15     | 38                   | 2  | 5               | 4                | 26            | 59 | 75                        | 103                |                            |                    |  |                                  |
| 95               | JAWA TENGAH         | KLATEN (90)             | 90                                                          | 20                   | 2 | 24    | 31              | 79  | 45              | 34                | 2  | 86       | 114            | 20     | 98                   | 23 | 2               | 5                | 56            | 21 | 8                         | 19                 |                            |                    |  |                                  |
| 96               | NUSA TENGGARA BARAT | LOMBOK TIMUR (91)       | 91                                                          | 15                   | 2 | 34    | 26              | 73  | 28              | 13                | 42 | 65       | 65             | 22     | 37                   | 32 | 9               | 5                | 100           | 68 | 53                        | 91                 |                            |                    |  |                                  |
| 97               | BANTEN              | SERANG (92)             | 92                                                          | 15                   | 2 | 29    | 33              | 78  | 41              | 13                | 64 | 100      | 125            | 17     | 95                   | 15 | 5               | 3                | 35            | 33 | 7                         | 27                 |                            |                    |  |                                  |
| 98               | KALIMANTAN TENGAH   | BARITO SELATAN (93)     | 93                                                          | 16                   | 2 | 20    | 41              | 85  | 36              | 11                | 62 | 87       | 82             | 22     | 42                   | 29 | 1               | 3                | 29            | 66 | 63                        | 94                 |                            |                    |  |                                  |
| 99               | JAWA TENGAH         | KENDAL (94)             | 94                                                          | 17                   | 3 | 47    | 31              | 105 | 30              | 6                 | 45 | 66       | 88             | 13     | 67                   | 41 | 10              | 3                | 82            | 15 | 12                        | 21                 |                            |                    |  |                                  |
| 100              | SUMATERA UTARA      | TANAH KARO (95)         | 95                                                          | 15                   | 3 | 46    | 41              | 122 | 28              | 51                | 59 | 108      | 63             | 15     | 12                   | 38 | 5               | 4                | 71            | 46 | 41                        | 63                 |                            |                    |  |                                  |
| 101              | JAWA TIMUR          | JOMBANG (96)            | 96                                                          | 18                   | 3 | 45    | 20              | 83  | 28              | 25                | 38 | 76       | 101            | 18     | 92                   | 17 | 7               | 5                | 72            | 27 | 20                        | 32                 |                            |                    |  |                                  |
| 102              | SULAWESI TENGAH     | MOROWALI (97)           | 97                                                          | 21                   | 2 | 28    | 37              | 103 | 48              | 5                 | 61 | 105      | 61             | 12     | 10                   | 46 | 7               | 4                | 92            | 82 | 65                        | 109                |                            |                    |  |                                  |
| 103              | JAWA BARAT          | BOGOR (98)              | 98                                                          | 18                   | 3 | 41    | 37              | 114 | 28              | 55                | 44 | 103      | 125            | 17     | 89                   | 3  | 5               | 4                | 27            | 11 | 21                        | 26                 |                            |                    |  |                                  |
| 104              | JAWA BARAT          | SUMEDANG (98)           | 98                                                          | 15                   | 3 | 47    | 33              | 106 | 26              | 40                | 69 | 84       | 111            | 18     | 92                   | 7  | 5               | 5                | 36            | 32 | 19                        | 35                 |                            |                    |  |                                  |
| 105              | R I A U             | INDRAGIRI HILIR (99)    | 99                                                          | 17                   | 1 | 12    | 58              | 90  | 38              | 10                | 11 | 63       | 77             | 22     | 61                   | 43 | 8               | 4                | 91            | 54 | 49                        | 77                 |                            |                    |  |                                  |
| 106              | SULAWESI SELATAN    | LUWU (99)               | 99                                                          | 17                   | 1 | 19    | 27              | 62  | 40              | 7                 | 35 | 79       | 107            | 4      | 80                   | 25 | 7               | 4                | 73            | 77 | 45                        | 91                 |                            |                    |  |                                  |
| 107              | JAWA TENGAH         | KARANG ANYAR (100)      | 100                                                         | 15                   | 2 | 30    | 33              | 80  | 33              | 36                | 14 | 81       | 93             | 6      | 54                   | 36 | 10              | 4                | 98            | 38 | 41                        | 55                 |                            |                    |  |                                  |
| 108              | LAMPUNG             | LAMPUNG UTARA (101)     | 101                                                         | 14                   | 3 | 45    | 34              | 97  | 21              | 51                | 42 | 69       | 95             | 5      | 81                   | 17 | 4               | 4                | 52            | 57 | 36                        | 69                 |                            |                    |  |                                  |
| 109              | SUMATERA UTARA      | SIMALUNGUN (102)        | 102                                                         | 22                   | 2 | 21    | 46              | 103 | 36              | 11                | 43 | 81       | 90             | 7      | 48                   | 9  | 5               | 3                | 32            | 59 | 72                        | 101                |                            |                    |  |                                  |
| 110              | JAWA BARAT          | BANDUNG (103)           | 103                                                         | 19                   | 2 | 21    | 36              | 87  | 34              | 50                | 68 | 122      | 127            | 17     | 62                   | 1  | 5               | 3                | 17            | 49 | 52                        | 77                 |                            |                    |  |                                  |
| 111              | GORONTALO           | GORONTALO (104)         | 104                                                         | 16                   | 3 | 52    | 41              | 128 | 17              | 11                | 62 | 43       | 70             | 18     | 101                  | 13 | 6               | 4                | 58            | 51 | 40                        | 70                 |                            |                    |  |                                  |
| 112              | SULAWESI SELATAN    | TAKALAR (105)           | 105                                                         | 19                   | 2 | 33    | 48              | 118 | 28              | 30                | 53 | 83       | 109            | 18     | 87                   | 20 | 6               | 2                | 24            | 46 | 29                        | 49                 |                            |                    |  |                                  |
| 113              | KALIMANTAN BARAT    | PONTIANAK (106)         | 106                                                         | 19                   | 3 | 33    | 54              | 122 | 36              | 17                | 68 | 99       | 97             | 6      | 41                   | 17 | 1               | 3                | 25            | 61 | 47                        | 82                 |                            |                    |  |                                  |
| 114              | KALIMANTAN SELATAN  | HULU SUNGAI SEL.(107)   | 107                                                         | 16                   | 2 | 34    | 41              | 102 | 36              | 11                | 62 | 87       | 94             | 22     | 61                   | 27 | 1               | 5                | 44            | 59 | 46                        | 89                 |                            |                    |  |                                  |

| No.              | Propinsi            | Kabupaten                | PERINGKAT TIAP INDIKATOR, VARIABEL, FAKTOR DAN SECARA TOTAL |                      |   |       |                 |     |                 |                   |          |                |        |                      |                 |                  |               |                           |                    |                            |                    |                                  |
|------------------|---------------------|--------------------------|-------------------------------------------------------------|----------------------|---|-------|-----------------|-----|-----------------|-------------------|----------|----------------|--------|----------------------|-----------------|------------------|---------------|---------------------------|--------------------|----------------------------|--------------------|----------------------------------|
|                  |                     |                          | TOTAL SCORE                                                 | Aparatur & Pelayanan |   | Perda | Keuangan Daerah |     | Kepastian Hukum | TOTAL KELEMBAGAAN | Keamanan | Sosial Politik | Budaya | TOTAL SOSIAL POLITIK | Potensi Ekonomi | Struktur Ekonomi | TOTAL EKONOMI | Ketersediaan Tenaga Kerja | Biaya Tenaga Kerja | Produktivitas Tenaga Kerja | TOTAL TENAGA KERJA | Ketersediaan Infrastruktur Fisik |
| Jumlah Peringkat |                     |                          | 146                                                         | 22                   | 3 | 53    | 61              | 138 | 48              | 63                | 69       | 130            | 143    | 25                   | 114             | 52               | 17            | 5                         | 117                | 92                         | 79                 | 124                              |
| 115              | JAWA TENGAH         | PEKALONGAN (108)         | 108                                                         | 21                   | 2 | 29    | 51              | 120 | 33              | 29                | 41       | 92             | 121    | 20                   | 88              | 44               | 2             | 4                         | 66                 | 18                         | 8                  | 17                               |
| 116              | SULAWESI TENGGARA   | BUTON (109)              | 109                                                         | 16                   | 1 | 19    | 41              | 83  | 36              | 11                | 62       | 87             | 122    | 18                   | 103             | 25               | 1             | 5                         | 42                 | 60                         | 43                 | 78                               |
| 117              | KALIMANTAN SELATAN  | HULU SUNGAI TENGAH (110) | 110                                                         | 16                   | 2 | 27    | 41              | 95  | 36              | 11                | 62       | 87             | 115    | 22                   | 100             | 1                | 7             | 5                         | 33                 | 59                         | 46                 | 80                               |
| 118              | KALIMANTAN BARAT    | KETAPANG (111)           | 111                                                         | 16                   | 3 | 40    | 41              | 113 | 36              | 11                | 62       | 87             | 102    | 18                   | 67              | 11               | 1             | 4                         | 30                 | 64                         | 52                 | 89                               |
| 119              | JAWA TENGAH         | KEBUMEN (112)            | 112                                                         | 15                   | 2 | 29    | 35              | 82  | 28              | 17                | 45       | 73             | 103    | 22                   | 105             | 40               | 13            | 5                         | 109                | 41                         | 33                 | 50                               |
| 120              | NUSA TENGGARA TIMUR | MANGGARAI (113)          | 113                                                         | 10                   | 2 | 27    | 26              | 55  | 41              | 4                 | 58       | 86             | 118    | 12                   | 93              | 52               | 4             | 5                         | 91                 | 76                         | 77                 | 117                              |
| 121              | PAPUA               | MIMIKA (114)             | 114                                                         | 16                   | 3 | 28    | 41              | 96  | 36              | 11                | 62       | 87             | 106    | 17                   | 71              | 5                | 17            | 5                         | 62                 | 59                         | 55                 | 86                               |
| 122              | PAPUA               | JAYAWIJAYA (115)         | 115                                                         | 16                   | 2 | 25    | 41              | 92  | 36              | 11                | 62       | 87             | 98     | 8                    | 56              | 47               | 5             | 5                         | 84                 | 80                         | 66                 | 105                              |
| 123              | JAWA TIMUR          | LAMONGAN (116)           | 116                                                         | 15                   | 2 | 29    | 33              | 78  | 43              | 28                | 41       | 113            | 132    | 5                    | 94              | 18               | 13            | 5                         | 94                 | 32                         | 37                 | 47                               |
| 124              | SULAWESI TENGAH     | POSO (117)               | 117                                                         | 16                   | 2 | 32    | 41              | 99  | 36              | 37                | 62       | 115            | 126    | 18                   | 73              | 15               | 7             | 3                         | 43                 | 51                         | 46                 | 75                               |
| 125              | NUSA TENGGARA TIMUR | SUMBA BARAT (118)        | 118                                                         | 9                    | 3 | 49    | 25              | 74  | 24              | 19                | 50       | 61             | 97     | 12                   | 107             | 50               | 10            | 5                         | 114                | 74                         | 72                 | 110                              |
| 126              | DI. YOGYA           | JUNUNG KIDUL (119)       | 119                                                         | 18                   | 2 | 37    | 27              | 86  | 26              | 57                | 59       | 94             | 100    | 18                   | 55              | 41               | 12            | 4                         | 103                | 67                         | 64                 | 96                               |
| 127              | JAWA TENGAH         | MAGELANG (120)           | 120                                                         | 15                   | 3 | 41    | 48              | 116 | 28              | 35                | 41       | 81             | 108    | 18                   | 83              | 23               | 10            | 5                         | 93                 | 27                         | 41                 | 46                               |
| 128              | NUSA TENGGARA BARAT | DOMPU (121)              | 121                                                         | 16                   | 2 | 27    | 30              | 72  | 28              | 54                | 53       | 106            | 110    | 5                    | 50              | 25               | 9             | 5                         | 94                 | 76                         | 79                 | 115                              |
| 129              | JAWA BARAT          | SUKABUMI (122)           | 122                                                         | 16                   | 3 | 41    | 41              | 115 | 36              | 11                | 62       | 87             | 112    | 18                   | 87              | 13               | 10            | 4                         | 75                 | 37                         | 39                 | 54                               |
| 130              | SUMATERA SELATAN    | OGAN KOMERING ILIR (123) | 123                                                         | 16                   | 3 | 44    | 36              | 108 | 30              | 29                | 49       | 89             | 116    | 18                   | 87              | 33               | 7             | 4                         | 79                 | 37                         | 45                 | 59                               |
| 131              | KALIMANTAN SELATAN  | TAPIN (123)              | 123                                                         | 16                   | 3 | 42    | 41              | 119 | 36              | 11                | 62       | 87             | 94     | 22                   | 61              | 39               | 6             | 5                         | 90                 | 59                         | 40                 | 76                               |
| 132              | KALIMANTAN BARAT    | KAPUAS HULU (124)        | 124                                                         | 16                   | 3 | 48    | 41              | 127 | 36              | 11                | 62       | 87             | 102    | 1                    | 51              | 27               | 7             | 3                         | 54                 | 79                         | 52                 | 97                               |
| 133              | BENGKULU            | BENGKULU SELATAN (125)   | 125                                                         | 15                   | 3 | 47    | 14              | 64  | 30              | 50                | 49       | 112            | 128    | 11                   | 85              | 29               | 13            | 5                         | 105                | 73                         | 67                 | 102                              |
| 134              | NUSA TENGGARA TIMUR | NGADA (126)              | 126                                                         | 15                   | 2 | 34    | 48              | 103 | 27              | 10                | 55       | 59             | 81     | 5                    | 65              | 52               | 13            | 5                         | 117                | 83                         | 79                 | 123                              |
| 135              | JAWA TENGAH         | JEPARA (127)             | 127                                                         | 16                   | 2 | 32    | 55              | 107 | 40              | 28                | 36       | 102            | 117    | 20                   | 68              | 33               | 10            | 5                         | 101                | 39                         | 38                 | 53                               |
| 136              | KALIMANTAN SELATAN  | TANAH LAUT (128)         | 128                                                         | 22                   | 2 | 27    | 45              | 111 | 48              | 43                | 62       | 126            | 137    | 18                   | 66              | 24               | 1             | 4                         | 37                 | 51                         | 32                 | 60                               |
| 137              | SUMATERA UTARA      | DELI SERDANG (129)       | 129                                                         | 22                   | 3 | 42    | 61              | 133 | 48              | 51                | 67       | 130            | 135    | 13                   | 46              | 2                | 5             | 3                         | 18                 | 46                         | 29                 | 49                               |
| 138              | JAWA TENGAH         | SUKOHARJO (130)          | 130                                                         | 21                   | 3 | 43    | 60              | 131 | 28              | 25                | 52       | 80             | 99     | 20                   | 77              | 22               | 10            | 4                         | 89                 | 39                         | 41                 | 56                               |
| 139              | JAWA TIMUR          | BANYUWANGI (131)         | 131                                                         | 19                   | 2 | 29    | 43              | 104 | 43              | 25                | 58       | 116            | 130    | 5                    | 75              | 30               | 12            | 5                         | 105                | 43                         | 44                 | 64                               |
| 140              | JAWA TIMUR          | BANGKALAN (132)          | 132                                                         | 17                   | 2 | 29    | 35              | 90  | 48              | 20                | 48       | 120            | 133    | 22                   | 99              | 33               | 10            | 5                         | 101                | 52                         | 44                 | 74                               |
| 141              | JAWA TIMUR          | TULUNGAGUNG (132)        | 132                                                         | 21                   | 3 | 46    | 61              | 137 | 31              | 11                | 32       | 70             | 81     | 19                   | 57              | 18               | 13            | 4                         | 92                 | 65                         | 61                 | 92                               |
| 142              | JAWA TENGAH         | PEMALANG (132)           | 132                                                         | 18                   | 2 | 30    | 38              | 98  | 39              | 40                | 38       | 110            | 129    | 18                   | 97              | 40               | 10            | 4                         | 102                | 62                         | 38                 | 74                               |
| 143              | JAWA TIMUR          | PASURUAN (133)           | 133                                                         | 21                   | 2 | 11    | 56              | 97  | 36              | 59                | 49       | 123            | 142    | 6                    | 103             | 30               | 7             | 5                         | 82                 | 40                         | 38                 | 54                               |
| 144              | JAWA TENGAH         | BANYUMAS (134)           | 134                                                         | 19                   | 2 | 36    | 40              | 109 | 48              | 28                | 48       | 122            | 138    | 18                   | 101             | 15               | 10            | 5                         | 86                 | 46                         | 23                 | 44                               |
| 145              | PAPUA               | FAKFAK (135)             | 135                                                         | 16                   | 3 | 41    | 41              | 115 | 36              | 11                | 62       | 87             | 120    | 18                   | 101             | 26               | 17            | 4                         | 103                | 65                         | 66                 | 95                               |
| 146              | NUSA TENGGARA BARAT | LOMBOK BARAT (136)       | 136                                                         | 18                   | 3 | 33    | 56              | 121 | 34              | 29                | 54       | 98             | 131    | 11                   | 106             | 49               | 10            | 5                         | 110                | 48                         | 33                 | 57                               |
| 147              | JAWA TIMUR          | BONDOWOSO (137)          | 137                                                         | 22                   | 2 | 30    | 53              | 124 | 42              | 1                 | 60       | 78             | 119    | 5                    | 102             | 47               | 12            | 5                         | 113                | 78                         | 53                 | 98                               |
| 148              | JAWA TIMUR          | MOJOKERTO (138)          | 138                                                         | 21                   | 3 | 42    | 50              | 130 | 45              | 62                | 30       | 125            | 136    | 20                   | 68              | 23               | 3             | 4                         | 55                 | 39                         | 48                 | 62                               |
| 149              | NUSA TENGGARA BARAT | BIMA (139)               | 139                                                         | 15                   | 2 | 23    | 37              | 77  | 32              | 57                | 56       | 121            | 140    | 22                   | 113             | 20               | 10            | 5                         | 91                 | 75                         | 76                 | 114                              |
| 150              | LAMPUNG             | LAMPUNG TIMUR (140)      | 140                                                         | 22                   | 3 | 47    | 56              | 136 | 48              | 51                | 59       | 129            | 105    | 12                   | 23              | 27               | 4             | 5                         | 63                 | 90                         | 67                 | 119                              |
| 151              | D.I. YOGYAKARTA     | BANTUL (141)             | 141                                                         | 19                   | 2 | 36    | 44              | 116 | 46              | 57                | 50       | 127            | 141    | 18                   | 76              | 18               | 10            | 5                         | 90                 | 54                         | 41                 | 73                               |
| 152              | JAWA TIMUR          | JEMBER (142)             | 142                                                         | 20                   | 3 | 49    | 38              | 129 | 36              | 25                | 58       | 104            | 124    | 22                   | 99              | 30               | 10            | 5                         | 98                 | 60                         | 48                 | 82                               |
| 153              | LAMPUNG             | LAMPUNG SELATAN (143)    | 143                                                         | 21                   | 3 | 46    | 56              | 135 | 28              | 45                | 41       | 88             | 113    | 4                    | 69              | 29               | 13            | 4                         | 99                 | 69                         | 67                 | 101                              |
| 154              | JAWA TIMUR          | PAMEKASAN (144)          | 144                                                         | 20                   | 2 | 33    | 50              | 123 | 46              | 20                | 56       | 119            | 139    | 12                   | 110             | 40               | 7             | 5                         | 92                 | 78                         | 64                 | 103                              |
| 155              | JAWA TIMUR          | PONOROGO (145)           | 145                                                         | 22                   | 3 | 46    | 60              | 138 | 45              | 10                | 41       | 91             | 129    | 18                   | 112             | 19               | 12            | 5                         | 95                 | 58                         | 53                 | 83                               |
| 156              | NUSA TENGGARA TIMUR | FLORES TIMUR (146)       | 146                                                         | 22                   | 3 | 45    | 57              | 134 | 48              | 48                | 62       | 128            | 143    | 11                   | 109             | 51               | 4             | 5                         | 88                 | 73                         | 76                 | 112                              |

### Lampiran 1.1.3. Peringkat Kabupaten Berdasarkan Faktor Kelembagaan

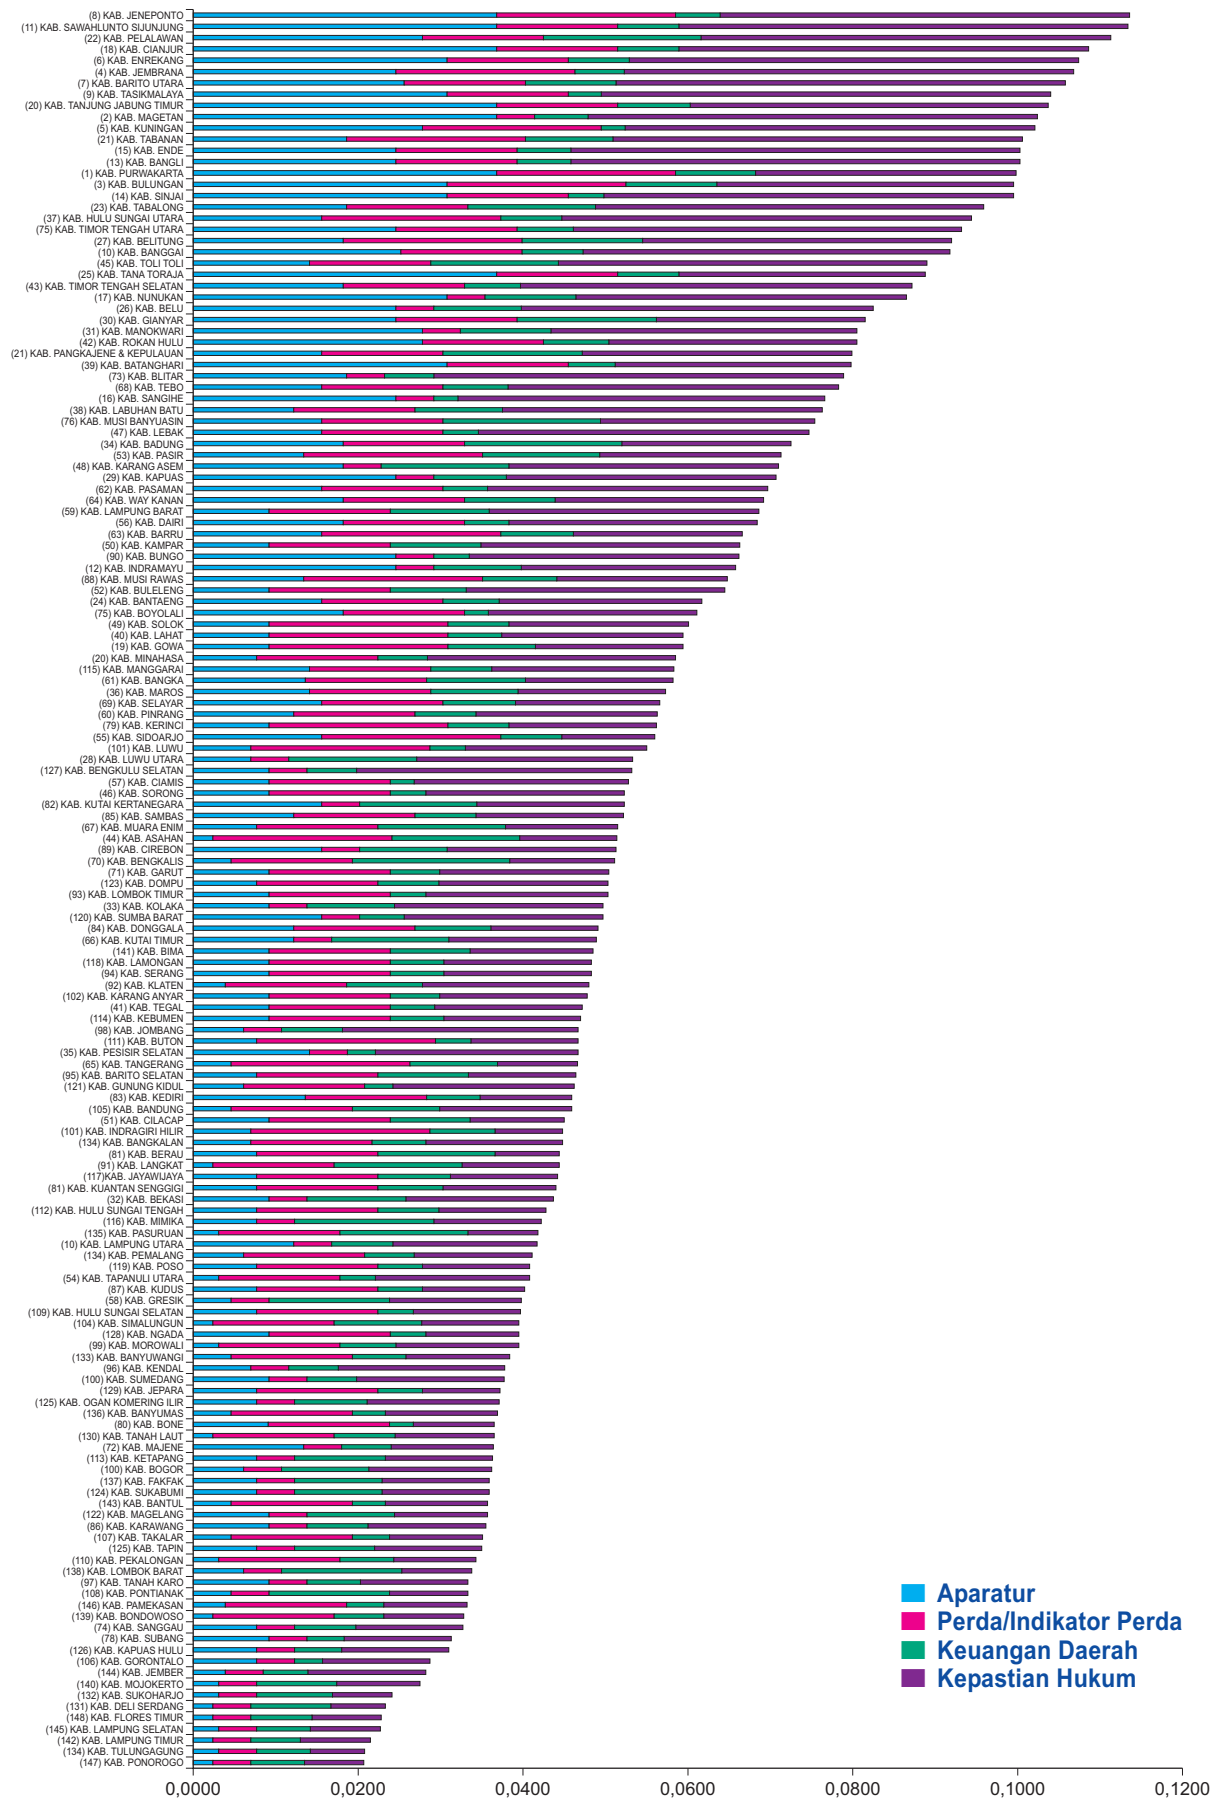



## Lampiran 1.1.4. Peringkat Kabupaten Berdasarkan Faktor Sosial Politik

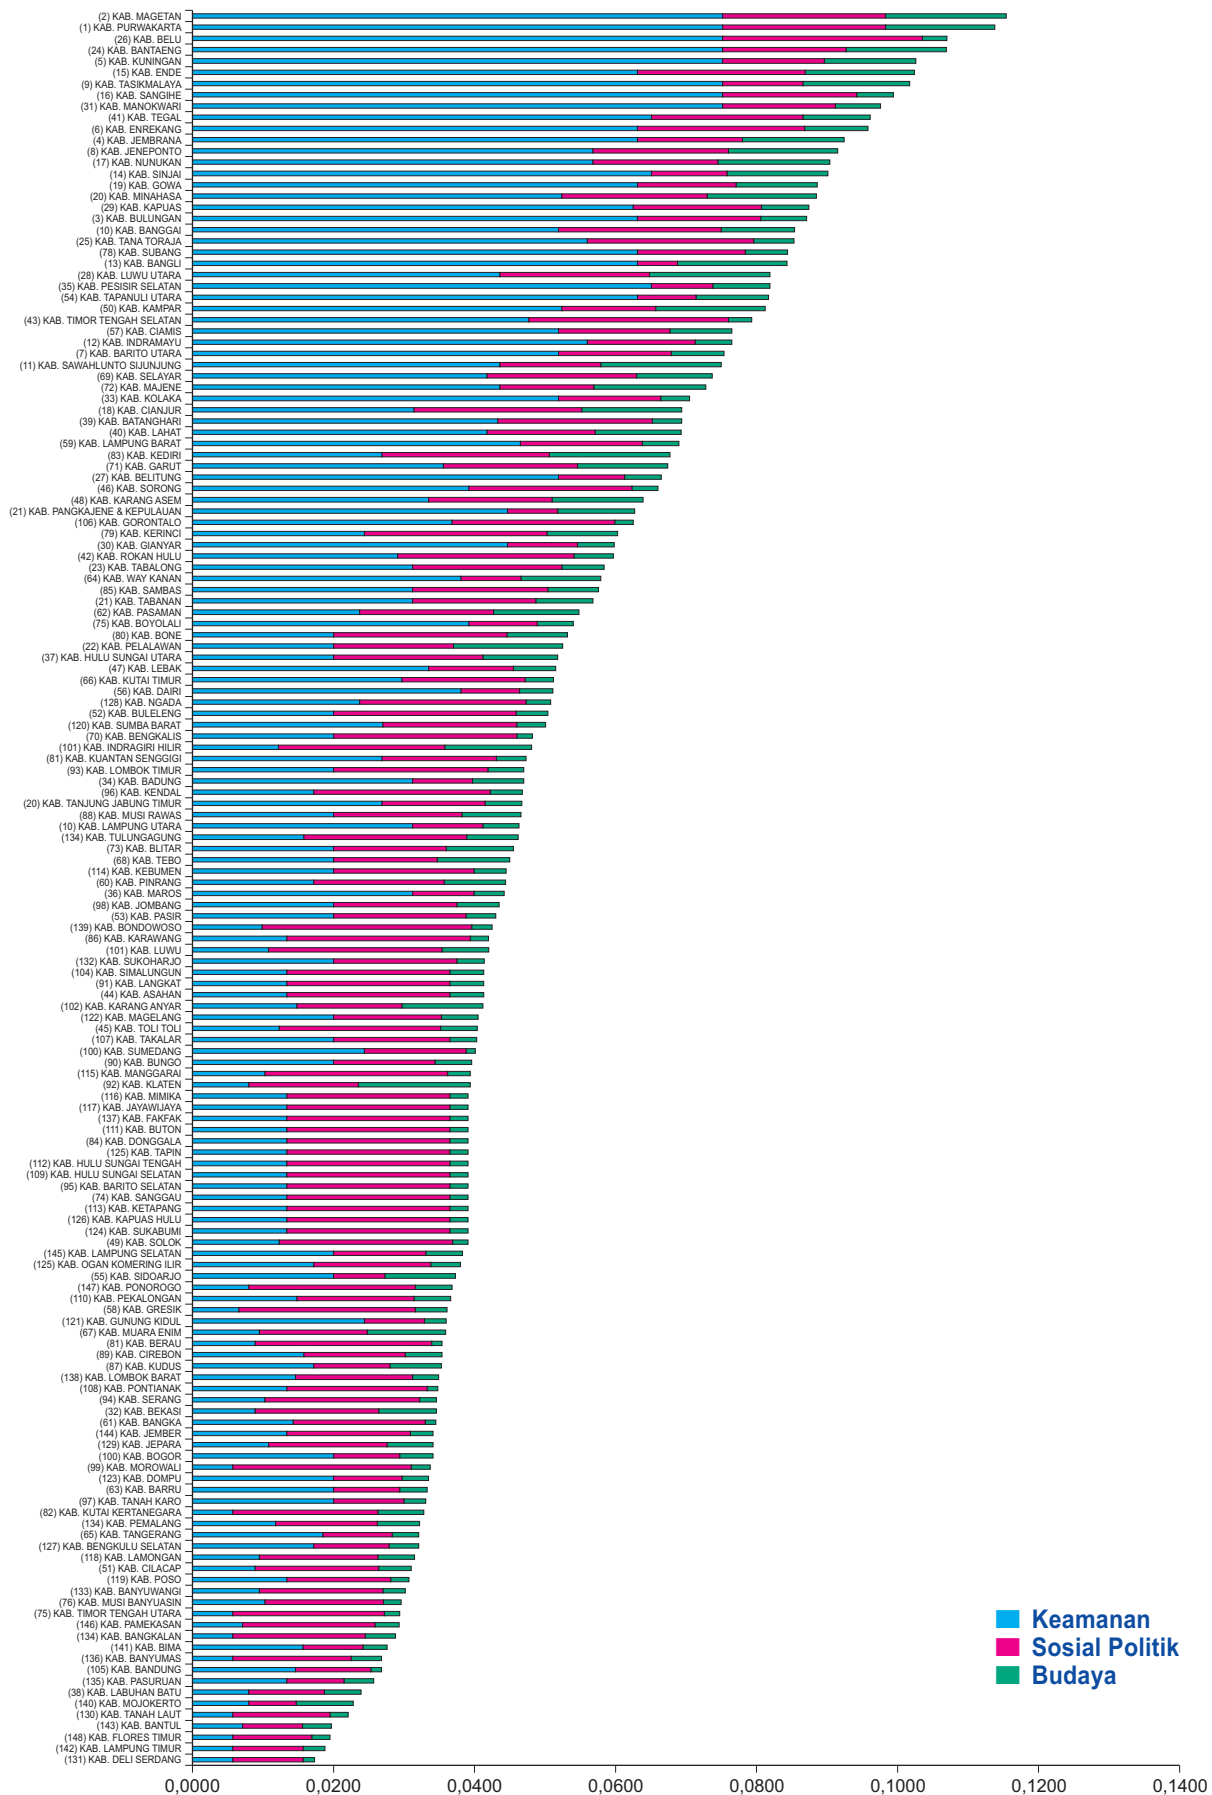

## Lampiran 1.1.5. Peringkat Kabupaten Berdasarkan Faktor Ekonomi Daerah

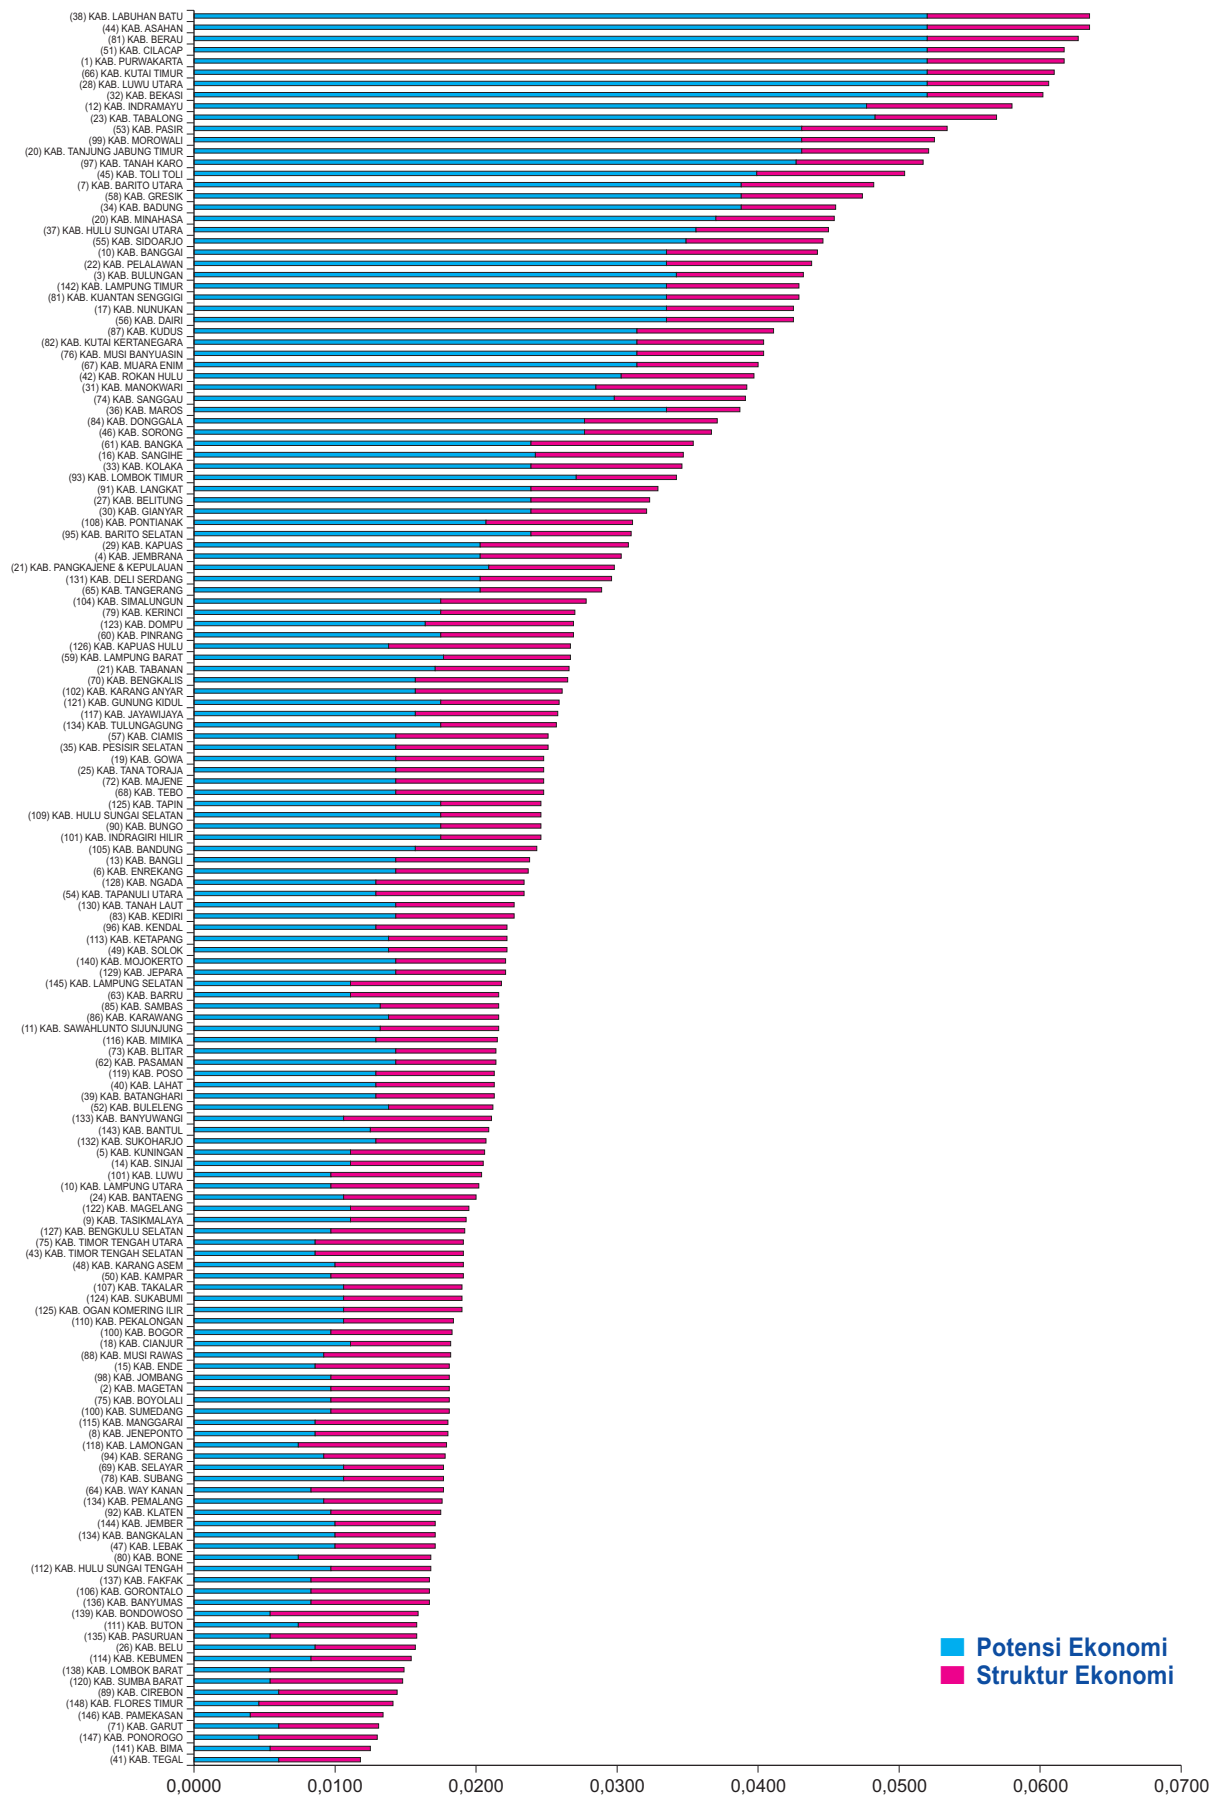

## Lampiran 1.1.6. Peringkat Kabupaten Berdasarkan Faktor Tenaga Kerja & Produktivitas

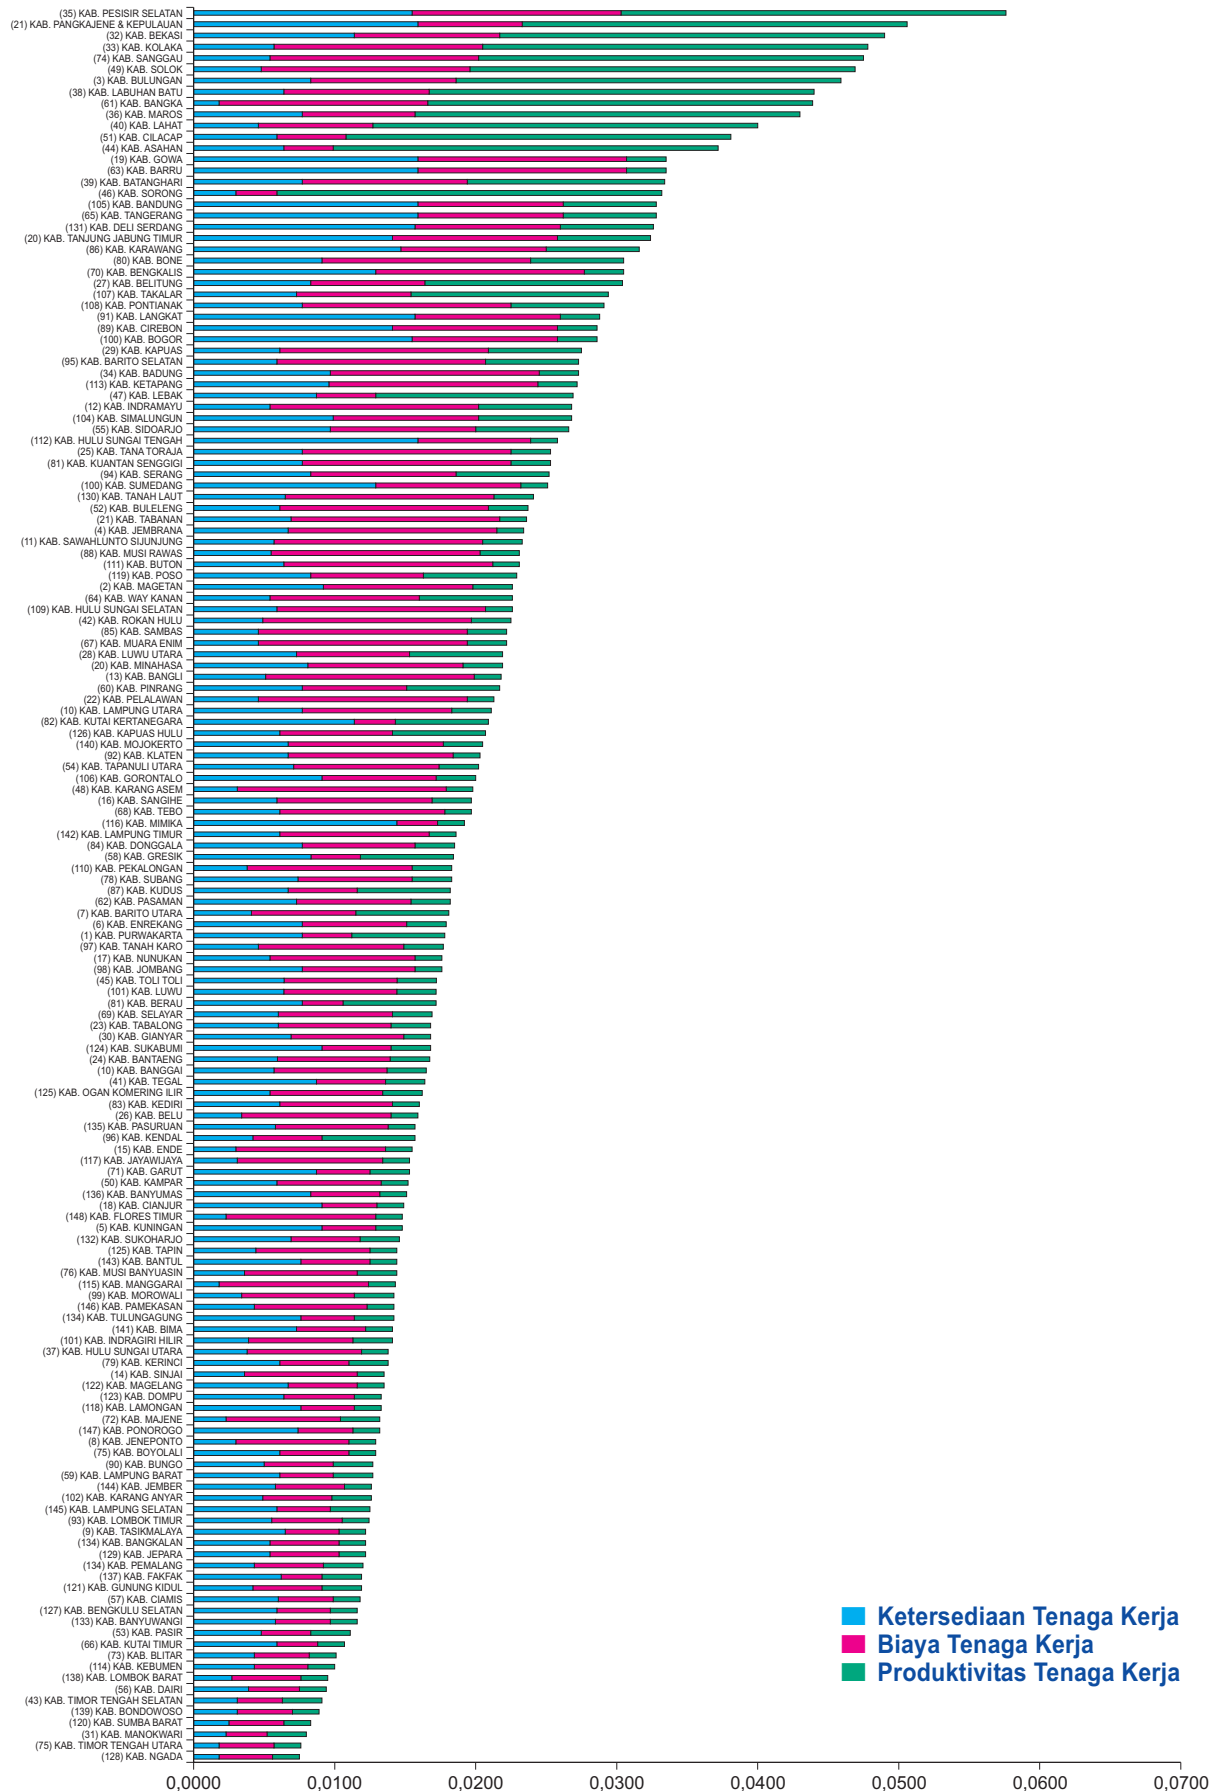

## Lampiran 1.1.7. Peringkat Kabupaten Berdasarkan Faktor Infrastruktur Fisik

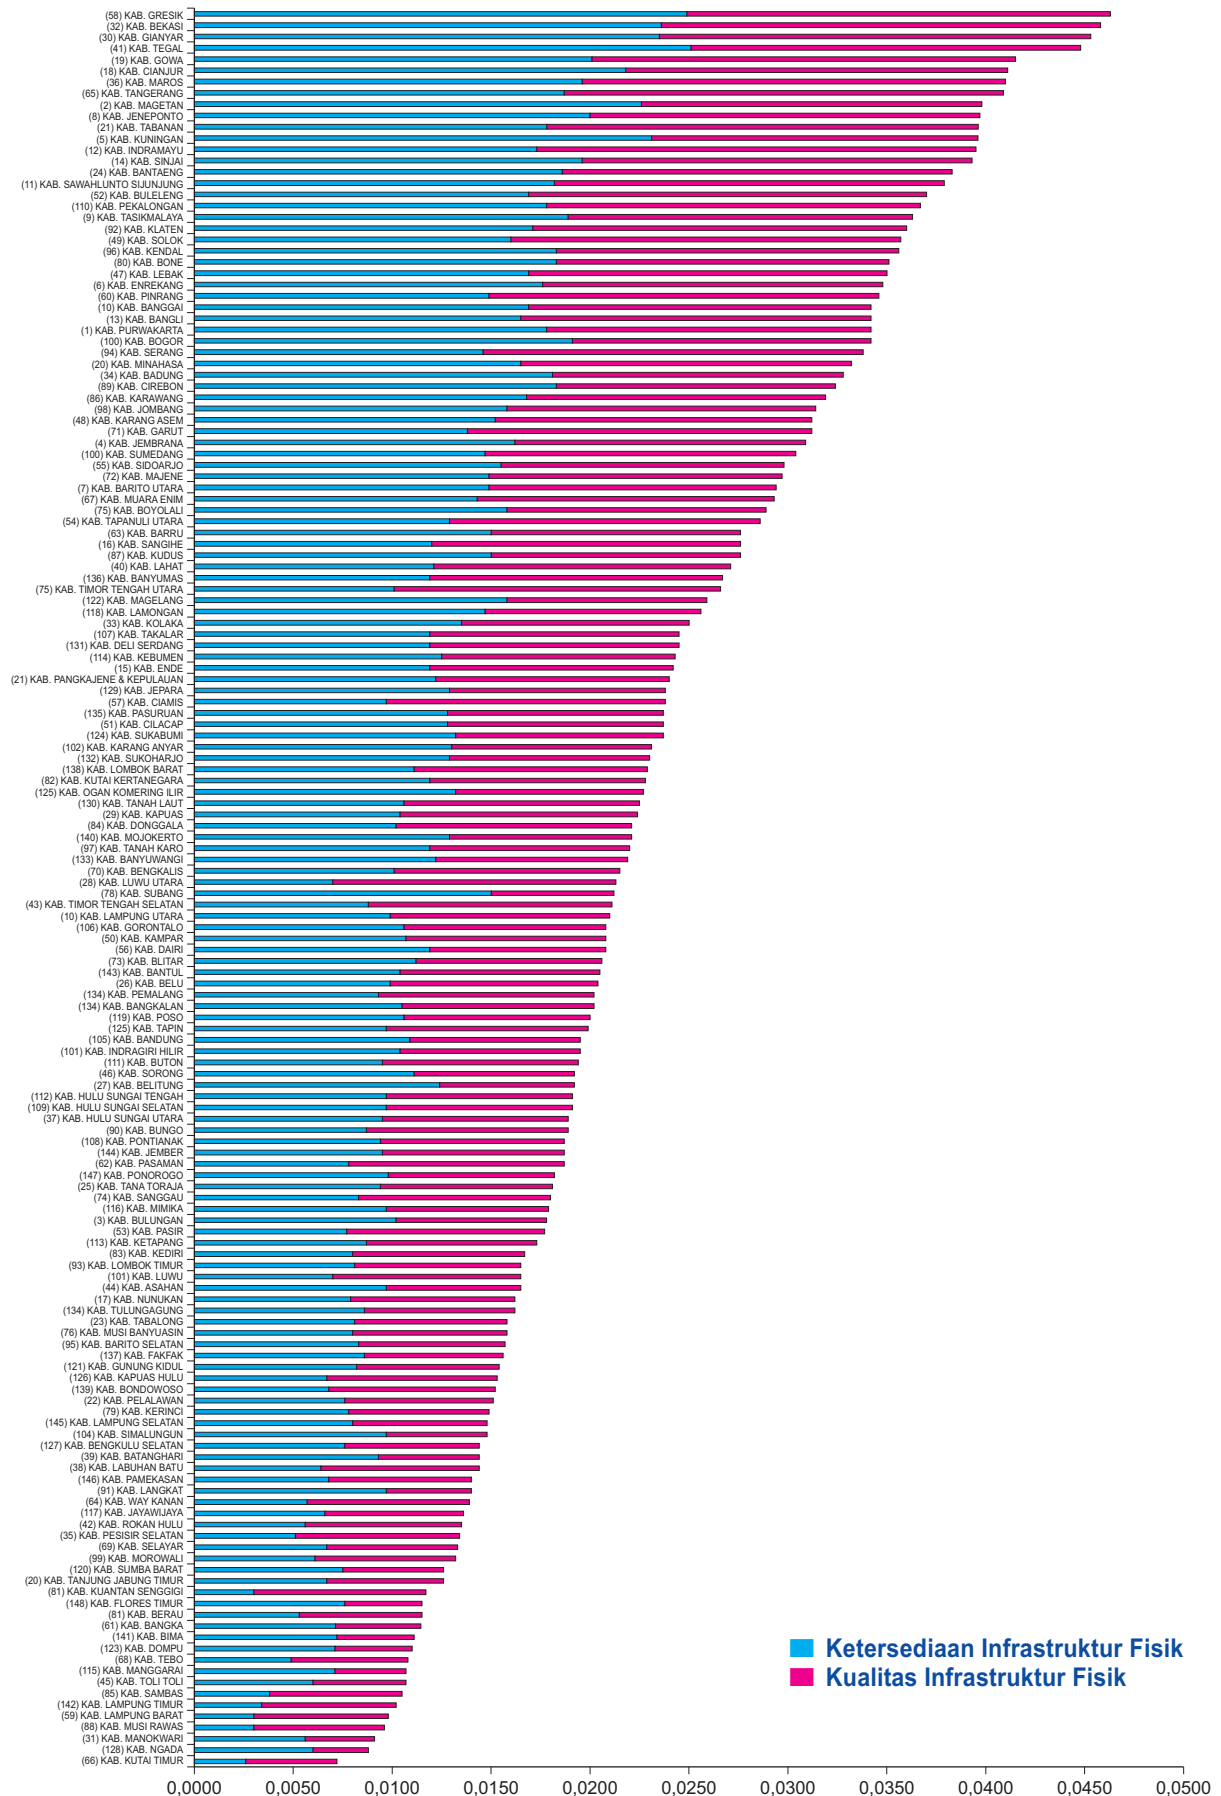

## Lampiran 1.2. Peringkat Kota

### Lampiran 1.2.1. Peringkat Daya Tarik Investasi 44 Kota di Indonesia

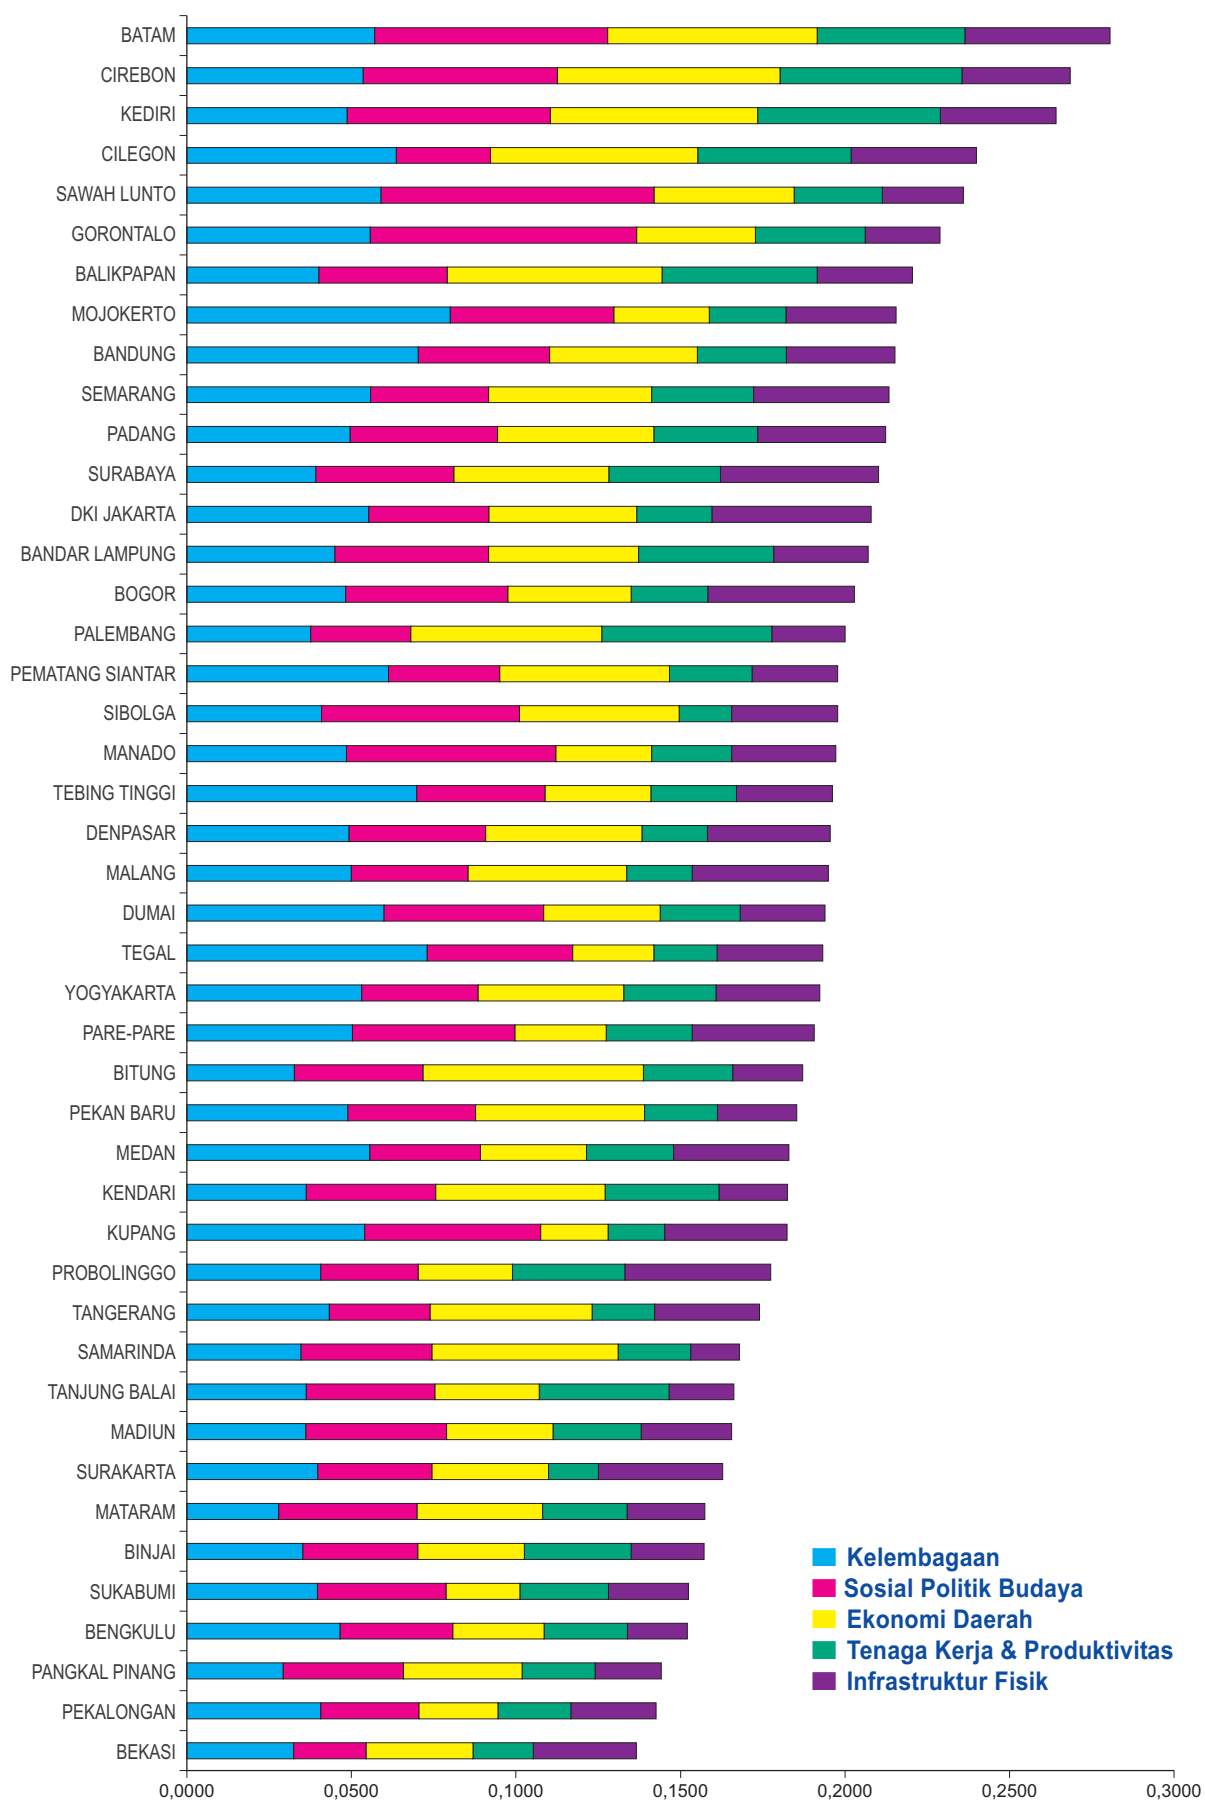

Lampiran 1.2.2. Neraca Peringkat Faktor dan Variabel Daya Tarik Investasi 44 Kota di Indonesia

| No.              | Propinsi          | Kota                  | PERINGKAT TIAP INDIKATOR, VARIABEL, FAKTOR DAN SECARA TOTAL |                      |       |                 |                 |                   |          |                |        |                      |                 |                  |               |                           |                    |                            |                    |                                  |
|------------------|-------------------|-----------------------|-------------------------------------------------------------|----------------------|-------|-----------------|-----------------|-------------------|----------|----------------|--------|----------------------|-----------------|------------------|---------------|---------------------------|--------------------|----------------------------|--------------------|----------------------------------|
|                  |                   |                       | TOTAL SCORE                                                 | Aparatur & Pelayanan | Perda | Keuangan Daerah | Kepastian Hukum | TOTAL KELEMBAGAAN | Keamanan | Sosial Politik | Budaya | TOTAL SOSIAL POLITIK | Potensi Ekonomi | Struktur Ekonomi | TOTAL EKONOMI | Ketersediaan Tenaga Kerja | Biaya Tenaga Kerja | Produktivitas Tenaga Kerja | TOTAL TENAGA KERJA | Ketersediaan Infrastruktur Fisik |
| Jumlah Peringkat |                   |                       | 43                                                          | 15                   | 3     | 15              | 27              | 42                | 19       | 30             | 23     | 40                   | 26              | 14               | 35            | 22                        | 15                 | 5                          | 40                 | 28                               |
| 1                | R I A U           | KOTA BATAM            | 1                                                           | 7                    | 3     | 3               | 5               | 9                 | 2        | 3              | 10     | 3                    | 1               | 9                | 4             | 21                        | 4                  | 1                          | 6                  | 3                                |
| 2                | JAWA BARAT        | KOTA CIREBON          | 2                                                           | 4                    | 3     | 11              | 5               | 15                | 3        | 16             | 8      | 7                    | 1               | 4                | 1             | 4                         | 2                  | 1                          | 2                  | 8                                |
| 3                | JAWA TIMUR        | KOTA KEDIRI           | 3                                                           | 8                    | 3     | 8               | 6               | 22                | 5        | 3              | 9      | 5                    | 2               | 9                | 5             | 9                         | 1                  | 1                          | 1                  | 10                               |
| 4                | BANTEN            | KOTA CILEGON          | 4                                                           | 4                    | 2     | 2               | 10              | 5                 | 11       | 28             | 22     | 39                   | 2               | 9                | 5             | 7                         | 12                 | 1                          | 5                  | 9                                |
| 5                | SUMATERA BARAT    | KOTA SAWAH LUNTO      | 5                                                           | 7                    | 2     | 14              | 4               | 8                 | 1        | 8              | 7      | 1                    | 12              | 8                | 19            | 6                         | 6                  | 4                          | 21                 | 23                               |
| 6                | GORONTALO         | KOTA GORONTALO        | 6                                                           | 8                    | 1     | 15              | 8               | 11                | 1        | 12             | 5      | 2                    | 14              | 14               | 22            | 7                         | 1                  | 4                          | 12                 | 27                               |
| 7                | KALIMANTAN TIMUR  | KOTA BALIKPAPAN       | 7                                                           | 9                    | 3     | 3               | 20              | 30                | 14       | 7              | 20     | 23                   | 1               | 6                | 3             | 3                         | 15                 | 1                          | 4                  | 14                               |
| 8                | JAWA TIMUR        | KOTA MOJOKERTO        | 8                                                           | 1                    | 2     | 11              | 1               | 1                 | 11       | 3              | 2      | 9                    | 20              | 10               | 29            | 2                         | 9                  | 5                          | 29                 | 15                               |
| 9                | JAWA BARAT        | KOTA BANDUNG          | 9                                                           | 8                    | 1     | 7               | 3               | 3                 | 8        | 19             | 18     | 20                   | 11              | 5                | 17            | 3                         | 12                 | 3                          | 18                 | 14                               |
| 10               | JAWA TENGAH       | KOTA SEMARANG         | 10                                                          | 10                   | 1     | 3               | 21              | 10                | 15       | 11             | 14     | 27                   | 7               | 5                | 10            | 9                         | 1                  | 4                          | 15                 | 9                                |
| 11               | SUMATERA BARAT    | KOTA PADANG           | 11                                                          | 13                   | 2     | 4               | 12              | 19                | 8        | 15             | 7      | 14                   | 7               | 10               | 14            | 3                         | 6                  | 3                          | 14                 | 7                                |
| 12               | JAWA TIMUR        | KOTA SURABAYA         | 12                                                          | 10                   | 3     | 8               | 10              | 33                | 10       | 18             | 7      | 18                   | 11              | 4                | 15            | 15                        | 4                  | 2                          | 11                 | 1                                |
| 13               | DKI JAKARTA       | DKI JAKARTA           | 13                                                          | 9                    | 2     | 1               | 15              | 13                | 17       | 5              | 17     | 26                   | 11              | 5                | 17            | 9                         | 15                 | 3                          | 30                 | 1                                |
| 14               | LAMPUNG           | KOTA BANDAR LAMPUNG   | 14                                                          | 13                   | 2     | 9               | 11              | 26                | 10       | 4              | 14     | 13                   | 9               | 5                | 16            | 4                         | 3                  | 2                          | 7                  | 16                               |
| 15               | JAWA BARAT        | KOTA BOGOR            | 15                                                          | 3                    | 3     | 7               | 17              | 24                | 5        | 26             | 4      | 11                   | 15              | 5                | 21            | 3                         | 12                 | 4                          | 29                 | 2                                |
| 16               | SUMATERA SELATAN  | KOTA PALEMBANG        | 16                                                          | 15                   | 2     | 8               | 23              | 34                | 19       | 15             | 7      | 36                   | 4               | 4                | 6             | 3                         | 7                  | 1                          | 3                  | 25                               |
| 17               | SUMATERA UTARA    | KOTA PEMATANG SIANTAR | 17                                                          | 2                    | 2     | 11              | 8               | 6                 | 8        | 30             | 6      | 33                   | 7               | 4                | 8             | 17                        | 4                  | 3                          | 27                 | 21                               |
| 18               | SUMATERA UTARA    | KOTA SIBOLGA          | 17                                                          | 12                   | 2     | 13              | 16              | 28                | 4        | 9              | 8      | 6                    | 6               | 14               | 12            | 22                        | 15                 | 3                          | 39                 | 16                               |
| 19               | SULAWESI UTARA    | KOTA MANADO           | 18                                                          | 13                   | 2     | 8               | 9               | 23                | 8        | 2              | 1      | 4                    | 20              | 10               | 29            | 1                         | 11                 | 4                          | 29                 | 12                               |
| 20               | SUMATERA UTARA    | KOTA TEBING TINGGI    | 19                                                          | 1                    | 3     | 7               | 2               | 4                 | 8        | 22             | 9      | 24                   | 19              | 5                | 27            | 6                         | 12                 | 3                          | 24                 | 18                               |
| 21               | BALI              | KOTA DENPASAR         | 20                                                          | 11                   | 2     | 7               | 10              | 20                | 12       | 15             | 2      | 19                   | 7               | 10               | 14            | 15                        | 7                  | 4                          | 34                 | 4                                |
| 22               | JAWA TIMUR        | KOTA MALANG           | 21                                                          | 12                   | 1     | 8               | 19              | 18                | 15       | 11             | 16     | 28                   | 10              | 2                | 13            | 15                        | 11                 | 3                          | 34                 | 5                                |
| 23               | R I A U           | KOTA DUMAI            | 22                                                          | 11                   | 1     | 3               | 10              | 7                 | 9        | 5              | 9      | 12                   | 15              | 10               | 23            | 19                        | 1                  | 5                          | 28                 | 20                               |
| 24               | JAWA TENGAH       | KOTA TEGAL            | 23                                                          | 4                    | 1     | 13              | 2               | 2                 | 8        | 14             | 8      | 15                   | 23              | 12               | 32            | 19                        | 8                  | 3                          | 35                 | 6                                |
| 25               | D.I. YOGYAKARTA   | KOTA YOGYAKARTA       | 24                                                          | 8                    | 1     | 9               | 21              | 16                | 13       | 18             | 14     | 29                   | 8               | 10               | 18            | 15                        | 2                  | 3                          | 16                 | 11                               |
| 26               | SULAWESI SELATAN  | KOTA PARE-PARE        | 25                                                          | 6                    | 2     | 15              | 10              | 17                | 7        | 17             | 3      | 10                   | 20              | 13               | 31            | 5                         | 7                  | 4                          | 23                 | 16                               |
| 27               | SULAWESI UTARA    | KOTA BITUNG           | 26                                                          | 9                    | 3     | 11              | 21              | 39                | 14       | 7              | 20     | 23                   | 2               | 4                | 2             | 3                         | 11                 | 3                          | 17                 | 25                               |
| 28               | R I A U           | KOTA PEKAN BARU       | 27                                                          | 9                    | 2     | 7               | 15              | 21                | 18       | 2              | 12     | 25                   | 5               | 10               | 9             | 12                        | 7                  | 4                          | 32                 | 23                               |
| 29               | SUMATERA UTARA    | KOTA MEDAN            | 28                                                          | 8                    | 2     | 8               | 7               | 12                | 11       | 21             | 15     | 34                   | 16              | 10               | 26            | 4                         | 12                 | 3                          | 22                 | 16                               |
| 30               | SULAWESI TENGGARA | KOTA KENDARI          | 29                                                          | 9                    | 3     | 8               | 18              | 35                | 12       | 10             | 14     | 22                   | 6               | 7                | 9             | 3                         | 1                  | 4                          | 9                  | 24                               |
| 31               | NTT               | KOTA KUPANG           | 30                                                          | 7                    | 2     | 9               | 10              | 14                | 6        | 13             | 8      | 8                    | 25              | 10               | 35            | 13                        | 10                 | 5                          | 38                 | 19                               |
| 32               | JAWA TIMUR        | KOTA PROBOLINGGO      | 31                                                          | 5                    | 3     | 14              | 13              | 29                | 12       | 27             | 11     | 38                   | 21              | 10               | 30            | 11                        | 5                  | 2                          | 10                 | 3                                |
| 33               | BANTEN            | KOTA TANGERANG        | 32                                                          | 13                   | 2     | 1               | 26              | 27                | 11       | 25             | 14     | 35                   | 7               | 6                | 11            | 16                        | 13                 | 3                          | 36                 | 11                               |
| 34               | KALIMANTAN TIMUR  | KOTA SAMARINDA        | 33                                                          | 15                   | 2     | 6               | 27              | 38                | 14       | 6              | 20     | 21                   | 3               | 5                | 7             | 10                        | 15                 | 3                          | 33                 | 28                               |
| 35               | SUMATERA UTARA    | KOTA TANJUNG BALAI    | 34                                                          | 9                    | 3     | 6               | 21              | 35                | 14       | 7              | 20     | 23                   | 17              | 11               | 28            | 8                         | 4                  | 2                          | 8                  | 25                               |
| 36               | JAWA TIMUR        | KOTA MADIUN           | 35                                                          | 11                   | 3     | 3               | 22              | 36                | 5        | 29             | 23     | 16                   | 22              | 4                | 25            | 3                         | 14                 | 3                          | 20                 | 17                               |
| 37               | JAWA TENGAH       | KOTA SURAKARTA        | 36                                                          | 12                   | 2     | 9               | 22              | 31                | 12       | 18             | 20     | 31                   | 18              | 3                | 23            | 20                        | 8                  | 4                          | 40                 | 5                                |
| 38               | NTB               | KOTA MATARAM          | 37                                                          | 11                   | 3     | 7               | 27              | 42                | 15       | 1              | 21     | 17                   | 13              | 13               | 20            | 14                        | 2                  | 4                          | 25                 | 24                               |
| 39               | SUMATERA UTARA    | KOTA BINJAI           | 38                                                          | 14                   | 2     | 11              | 23              | 37                | 11       | 20             | 19     | 30                   | 22              | 4                | 25            | 18                        | 4                  | 2                          | 13                 | 23                               |
| 40               | JAWA BARAT        | KOTA SUKABUMI         | 39                                                          | 9                    | 2     | 15              | 21              | 32                | 14       | 7              | 20     | 23                   | 24              | 13               | 34            | 3                         | 6                  | 5                          | 19                 | 22                               |
| 41               | BENGKULU          | KOTA BENGKULU         | 40                                                          | 8                    | 2     | 12              | 14              | 25                | 13       | 18             | 21     | 32                   | 20              | 13               | 31            | 12                        | 3                  | 4                          | 26                 | 26                               |
| 42               | BANGKA BELITUNG   | KOTA PANGKAL PINANG   | 41                                                          | 8                    | 3     | 14              | 24              | 41                | 10       | 23             | 13     | 25                   | 15              | 7                | 22            | 18                        | 7                  | 3                          | 32                 | 27                               |
| 43               | JAWA TENGAH       | KOTA PEKALONGAN       | 42                                                          | 12                   | 2     | 5               | 25              | 29                | 16       | 24             | 6      | 37                   | 26              | 1                | 33            | 19                        | 2                  | 4                          | 31                 | 13                               |
| 44               | JAWA BARAT        | KOTA BEKASI           | 43                                                          | 15                   | 2     | 10              | 27              | 40                | 17       | 29             | 20     | 40                   | 18              | 6                | 24            | 16                        | 15                 | 3                          | 37                 | 14                               |

### Lampiran 1.2.3. Peringkat Kota Berdasarkan Faktor Kelembagaan

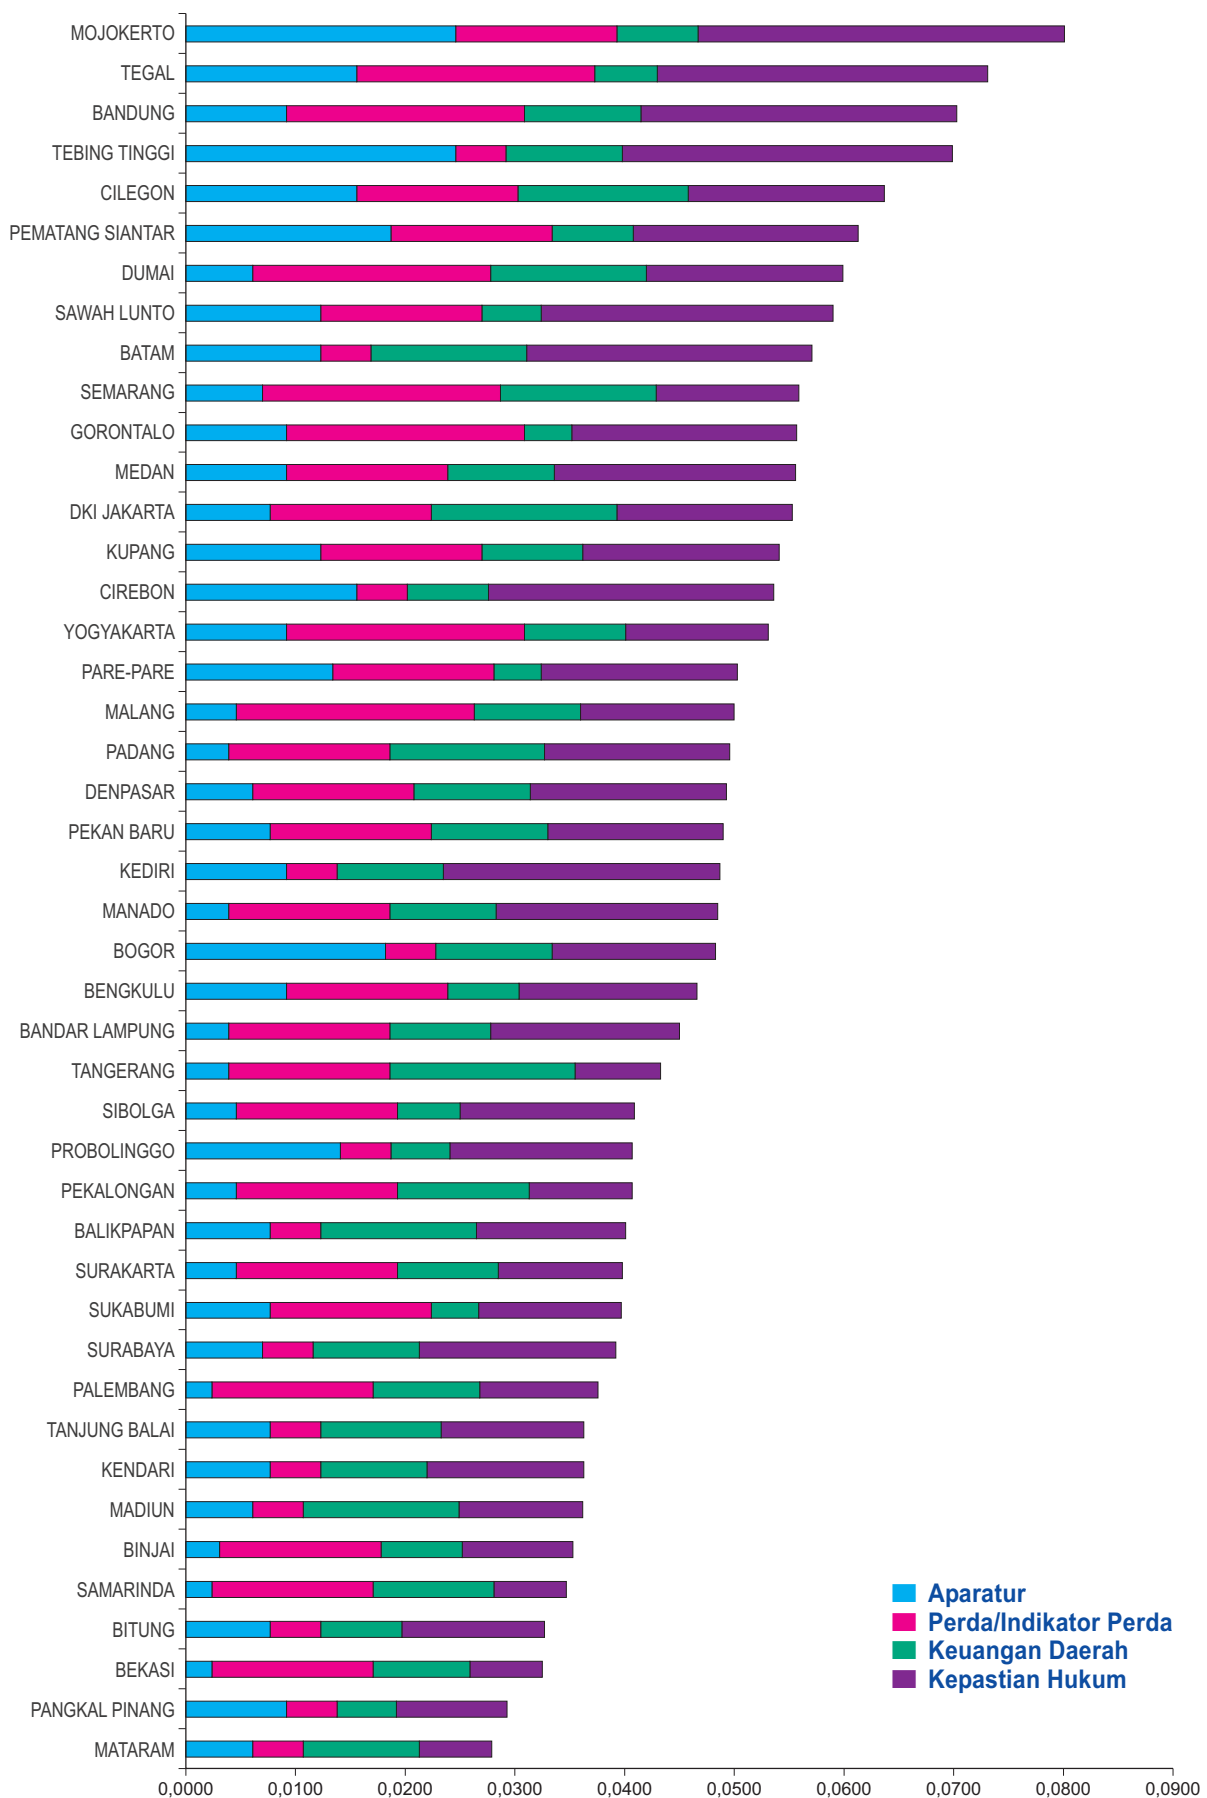

#### Lampiran 1.2.4. Peringkat Kota Berdasarkan Faktor Sosial Politik

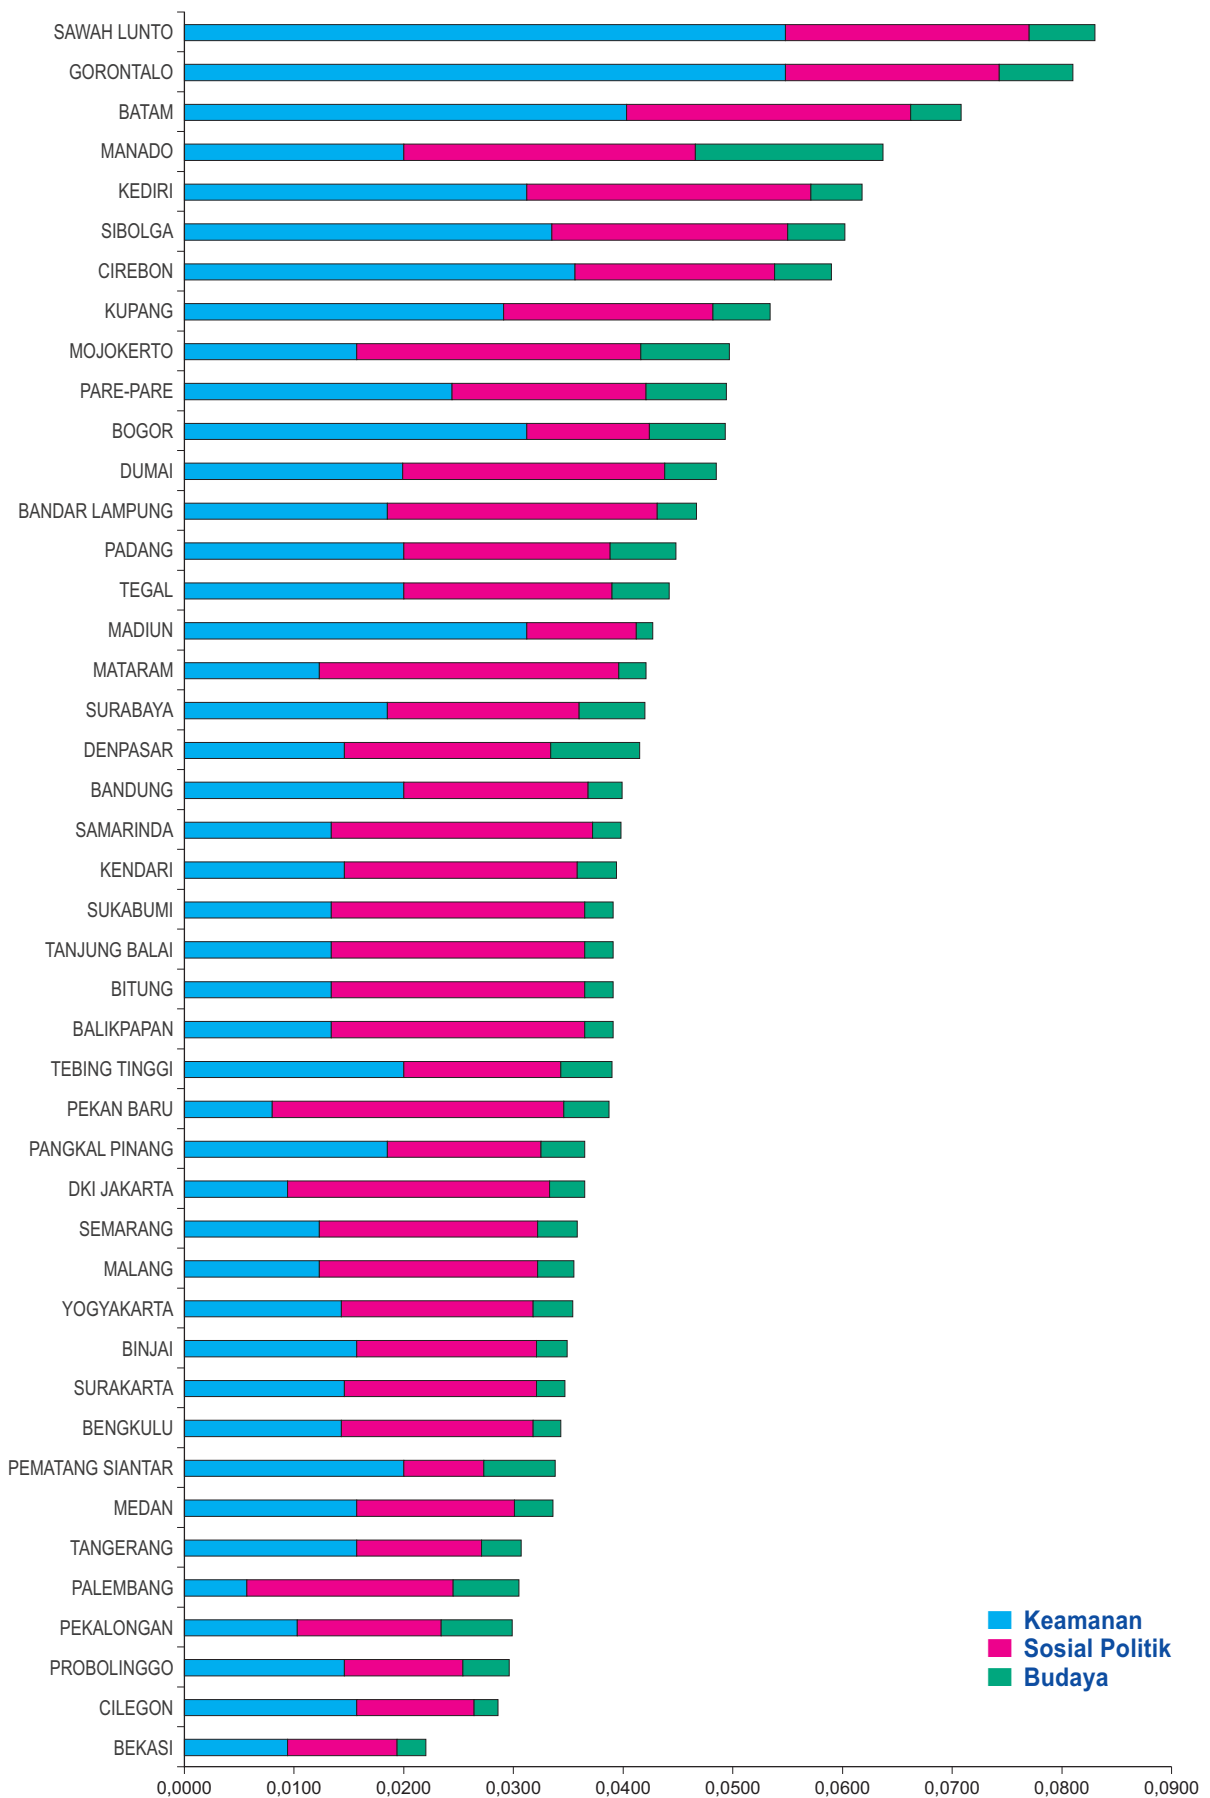



### Lampiran 1.2.5. Peringkat Kota Berdasarkan Faktor Ekonomi Daerah

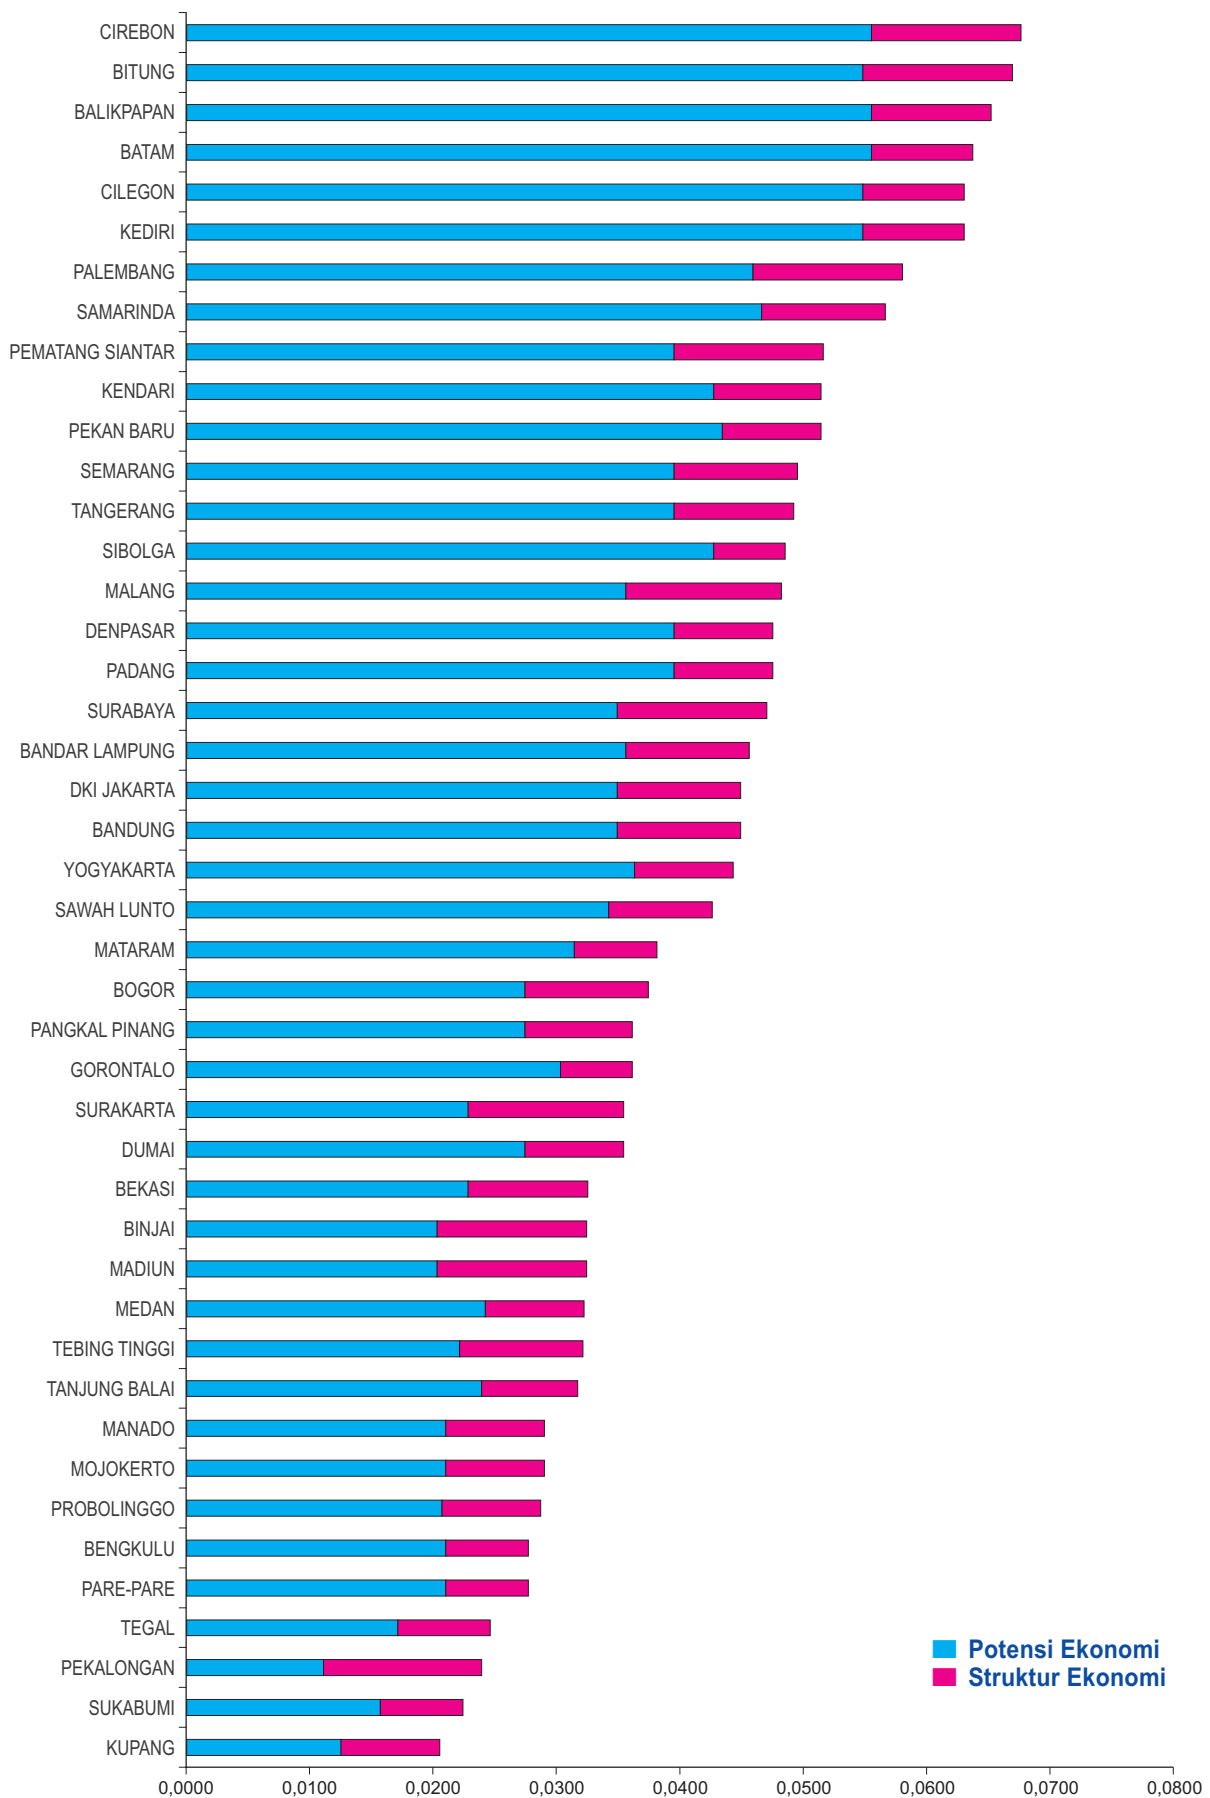

## Lampiran 1.2.6. Peringkat Kota Berdasarkan Faktor Tenaga Kerja & Produktivitas

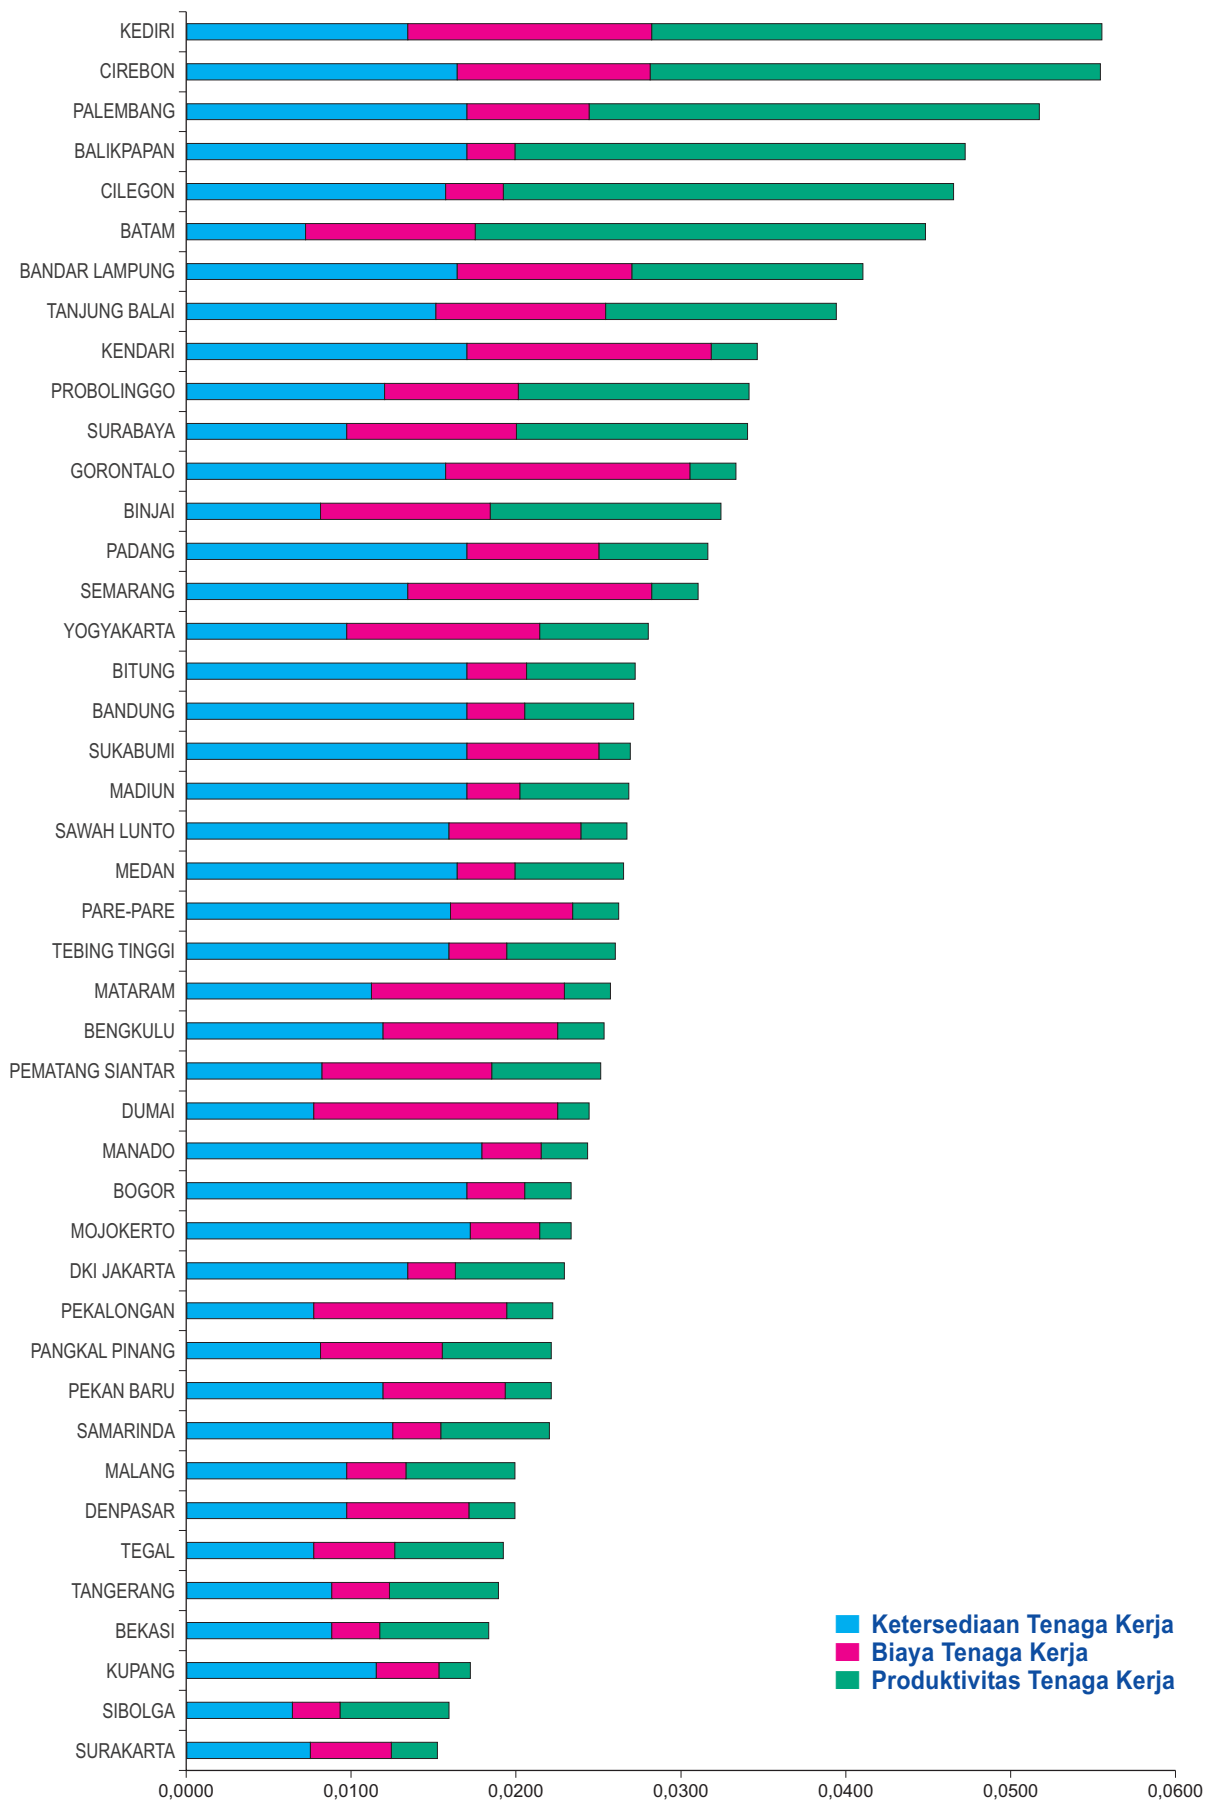

### Lampiran 1.2.7. Peringkat Kota Berdasarkan Faktor Infrastruktur Fisik

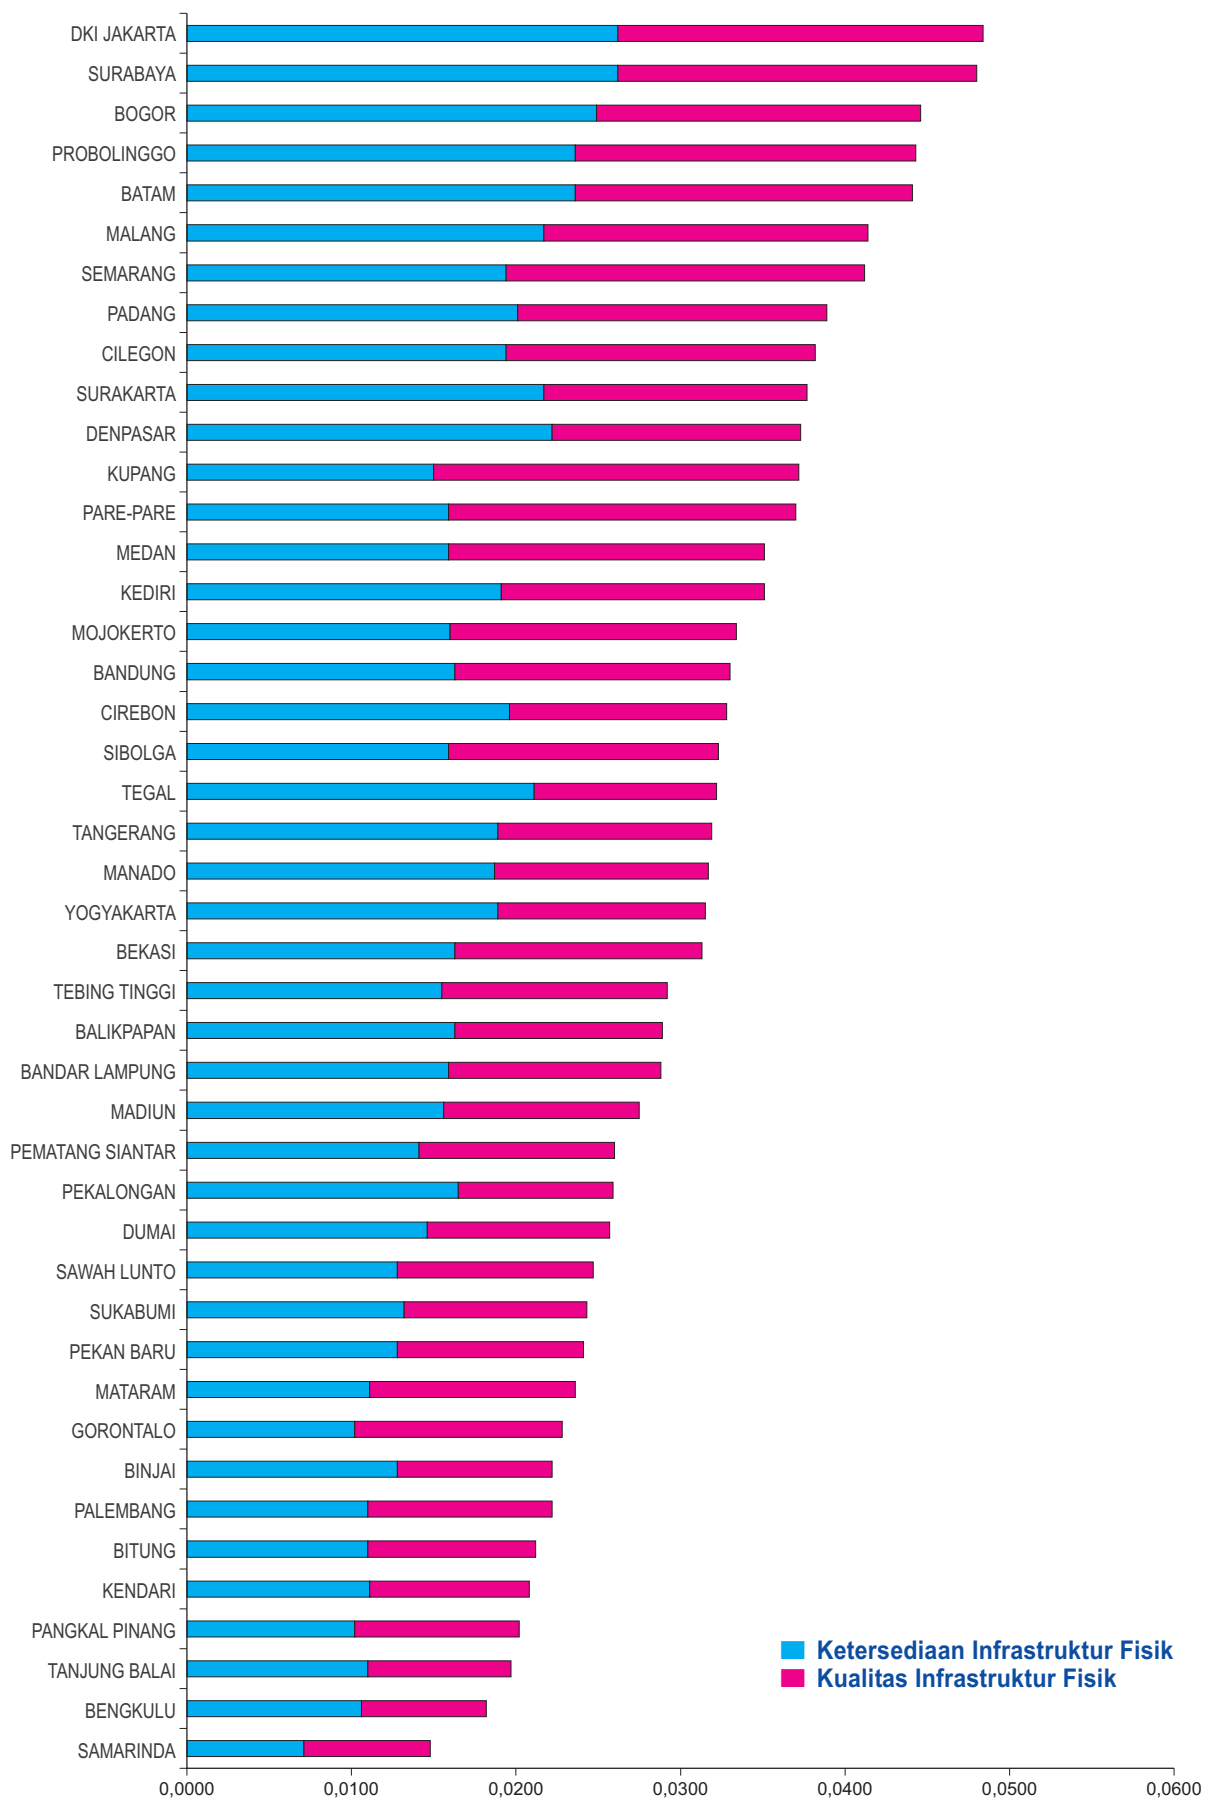

### Lampiran 1.3. Perubahan Peringkat Kabupaten

#### Lampiran 1.3.1. Perubahan Peringkat 10 Kabupaten dari Kelompok 10 Kabupaten Peringkat Atas Pada Rating 2003

| PROPINSI              |                      |                    |        | JAWA BARAT      | JAWA TIMUR   |        | KALIMANTAN TIMUR | BALI          |        | JAWA BARAT    | SULAWESI SELATAN | KALIMANTAN TENGAH |        | SULAWESI SELATAN | JAWA BARAT       | SULAWESI TENGAH |              | SUMATERA BARAT            |        |
|-----------------------|----------------------|--------------------|--------|-----------------|--------------|--------|------------------|---------------|--------|---------------|------------------|-------------------|--------|------------------|------------------|-----------------|--------------|---------------------------|--------|
| KETERANGAN            |                      | KABUPATEN/KOTA     |        | KAB. PURWAKARTA | KAB. MAGETAN |        | KAB. BULUNGAN    | KAB. JEMBRANA |        | KAB. KUNINGAN | KAB. ENREKANG    | KAB. BARITO UTARA |        | KAB. JENEPONTO   | KAB. TASIKMALAYA |                 | KAB. BANGGAI | KAB. SAWAHLUNTO SIJUNJUNG |        |
| FAKTOR                | VARIABEL             | INDIKATOR          | SKOR   | 2003            | 2003         | 2002   | 2003             | 2003          | 2002   | 2003          | 2002             | 2003              | 2003   | 2002             | 2003             | 2003            | 2002         | 2003                      | 2002   |
| KELEMBAGAAN           | Aparatur & Pelayanan | Birokrasi          | 0,0483 | A               | A            | C      | A                | B             | C      | A             | C                | A                 | A      | C                | A                | A               | C            | B                         | C      |
|                       |                      | P. Wewenang        | 0,0235 | A               | A            | C      | B                | A             | C      | C             | D                | B                 | E      | D                | A                | B               | D            | A                         | B      |
|                       | Perda                |                    | 0,0771 | B               | D            | D      | B                | B             | B      | B             | B                | C                 | C      | C                | B                | C               | C            | C                         | C      |
|                       | Keuangan Daerah      | Retribusi-Pajak    | 0,0316 | B               | C            | C      | C                | C             | C      | E             | E                | C                 | C      | C                | D                | D               | D            | C                         | C      |
|                       |                      | Anggaran Pemb.     | 0,0141 | D               | D            | D      | A                | E             | E      | E             | E                | C                 | A      | A                | C                | E               | E            | C                         | C      |
|                       | Kepastian Hukum      | Konsistensi Per.   | 0,0350 | A               | A            | C      | C                | A             | C      | A             | C                | A                 | A      | C                | A                | A               | C            | A                         | A      |
|                       |                      | Penegakan Hk.      | 0,0524 | C               | A            | C      | A                | A             | C      | A             | C                | A                 | A      | C                | A                | A               | C            | B                         | B      |
|                       |                      | Pungli LB          | 0,0194 | B               | A            | D      | C                | A             | C      | B             | C                | A                 | A      | A                | B                | A               | C            | A                         | B      |
|                       |                      | Eks-Leg            | 0,0167 | C               | C            | C      | C                | C             | C      | C             | C                | C                 | C      | C                | C                | C               | C            | C                         | C      |
|                       | Total Lembaga        |                    |        | 0,0998          | 0,1024       | 0,0369 | 0,0996           | 0,1068        | 0,0548 | 0,1021        | 0,0502           | 0,1075            | 0,1058 | 0,0587           | 0,1136           | 0,1041          | 0,0443       | 0,0918                    | 0,0783 |
| SOSIAL POLITIK BUDAYA | Keamanan             | Gangg. Usaha       | 0,0523 | A               | A            | B      | A                | A             | B      | A             | C                | A                 | A      | C                | B                | A               | D            | A                         | B      |
|                       |                      | Gangg. Masya.      | 0,0311 | A               | A            | B      | A                | A             | B      | A             | C                | A                 | A      | B                | B                | A               | C            | A                         | B      |
|                       |                      | Kec. Aparatur      | 0,0724 | A               | A            | C      | B                | B             | B      | A             | D                | B                 | C      | C                | A                | A               | D            | C                         | C      |
|                       | Sosial Politik       | Ptsp.Msy.          | 0,0120 | A               | A            | C      | C                | C             | C      | C             | D                | C                 | A      | D                | A                | A               | D            | A                         | A      |
|                       |                      | KonflikMsy         | 0,0184 | A               | A            | B      | C                | E             | C      | C             | D                | A                 | C      | B                | A                | C               | D            | A                         | C      |
|                       |                      | Stabilitas Politik | 0,0289 | B               | B            | B      | A                | A             | C      | C             | C                | B                 | B      | D                | C                | C               | C            | B                         | B      |
|                       |                      | Unjuk Rasa         | 0,0095 | D               | D            | A      | C                | E             | C      | A             | C                | B                 | D      | B                | C                | D               | C            | D                         | B      |
|                       | Budaya               | Terbuka            | 0,0086 | B               | A            | B      | B                | A             | C      | C             | C                | C                 | E      | C                | B                | A               | C            | E                         | A      |
|                       |                      | Non Diskriminasi   | 0,0064 | A               | A            | B      | C                | A             | C      | A             | C                | B                 | E      | C                | A                | A               | C            | E                         | A      |
|                       |                      | Adat Istiadat      | 0,0071 | A               | A            | C      | C                | A             | C      | B             | C                | B                 | E      | D                | A                | C               | C            | A                         | B      |
|                       |                      | Etos Kerja         | 0,0141 | A               | A            | C      | C                | B             | D      | A             | C                | B                 | A      | D                | A                | A               | C            | A                         | A      |
|                       | Total Sospolbud      |                    |        | 0,1138          | 0,1154       | 0,0623 | 0,0871           | 0,0924        | 0,0596 | 0,1026        | 0,0286           | 0,0958            | 0,0754 | 0,0389           | 0,0915           | 0,1017          | 0,0258       | 0,0854                    | 0,0674 |

| PROPINSI                     |                     |                 |        | JAWA BARAT      |        | JAWA TIMUR   |        | KALIMANTAN TIMUR |        | BALI          |        | JAWA BARAT    |        | SULAWESI SELATAN |        | KALIMANTAN TENGAH |        | SULAWESI SELATAN |        | JAWA BARAT       |        | SULAWESI TENGAH |      | SUMATERA BARAT            |      |
|------------------------------|---------------------|-----------------|--------|-----------------|--------|--------------|--------|------------------|--------|---------------|--------|---------------|--------|------------------|--------|-------------------|--------|------------------|--------|------------------|--------|-----------------|------|---------------------------|------|
| KETERANGAN                   |                     | KABUPATEN/KOTA  |        | KAB. PURWAKARTA |        | KAB. MAGETAN |        | KAB. BULUNGAN    |        | KAB. JEMBRANA |        | KAB. KUNINGAN |        | KAB. ENREKANG    |        | KAB. BARITO UTARA |        | KAB. JENEPONTO   |        | KAB. TASIKMALAYA |        | KAB. BANGGAI    |      | KAB. SAWAHLUNTO SIJUNJUNG |      |
| FAKTOR                       | VARIABEL            | INDIKATOR       | SKOR   | 2003            | 2003   | 2002         | 2003   | 2003             | 2002   | 2003          | 2002   | 2003          | 2003   | 2002             | 2003   | 2003              | 2002   | 2003             | 2002   | 2003             | 2002   | 2003            | 2002 | 2003                      | 2002 |
| EKONOMI DAERAH               | Potensi Ekonomi     | PDRB Per Kapita | 0,0481 | A               | D      | D            | A      | C                | C      | D             | D      | D             | A      | A                | E      | D                 | D      | C                | D      | C                | C      |                 |      |                           |      |
|                              |                     | Pertumbuhan     | 0,0463 | A               | E      | E            | E      | C                | C      | D             | D      | C             | C      | B                | C      | D                 | D      | A                | A      | C                | C      |                 |      |                           |      |
|                              |                     | IPM             | 0,0239 | C               | C      | C            | B      | B                | C      | C             | C      | C             | B      | C                | E      | C                 | C      | C                | C      | E                | C      |                 |      |                           |      |
|                              | Struktur Ekonomi    | NT Primer       | 0,0219 | E               | C      | D            | B      | C                | C      | C             | D      | B             | B      | B                | B      | D                 | C      | B                | B      | C                | B      |                 |      |                           |      |
|                              |                     | NT Sekunder     | 0,0151 | A               | C      | C            | D      | D                | D      | D             | D      | D             | D      | D                | D      | C                 | C      | C                | C      | C                | C      |                 |      |                           |      |
|                              |                     | NT Tersier      | 0,0123 | C               | C      | C            | E      | A                | A      | B             | C      | D             | D      | D                | D      | B                 | C      | D                | D      | C                | C      |                 |      |                           |      |
|                              | Total Ekonomi       |                 |        | 0,0617          | 0,0181 | 0,0155       | 0,0432 | 0,0303           | 0,0275 | 0,0206        | 0,0156 | 0,0237        | 0,0482 | 0,0525           | 0,0180 | 0,0193            | 0,0195 | 0,0442           | 0,0410 | 0,0216           | 0,0293 |                 |      |                           |      |
| TENAGA KERJA & PRODUKTIVITAS | Ketersediaan T.K.   | Usia Produktif  | 0,0099 | C               | A      | B            | B      | B                | A      | C             | B      | C             | E      | C                | E      | B                 | C      | D                | C      | D                | E      |                 |      |                           |      |
|                              |                     | SLTP            | 0,0097 | B               | B      | B            | B      | B                | B      | E             | E      | B             | B      | B                | D      | D                 | E      | B                | B      | B                | D      |                 |      |                           |      |
|                              |                     | Pencari Kerja   | 0,0235 | C               | C      | C            | C      | D                | C      | B             | B      | C             | E      | E                | D      | C                 | C      | D                | D      | D                | E      |                 |      |                           |      |
|                              | Biaya T.K.          | UMP/IHK         | 0,0144 | E               | D      | D            | E      | A                | A      | D             | B      | A             | A      | A                | A      | D                 | D      | A                | D      | A                | C      |                 |      |                           |      |
|                              |                     | Upah Aktual/IHK | 0,0163 | D               | B      | C            | B      | B                | B      | D             | D      | E             | E      | D                | D      | D                 | C      | D                | B      | B                | D      |                 |      |                           |      |
|                              | Produktivitas       |                 | 0,0525 | C               | D      | D            | A      | E                | D      | E             | D      | D             | C      | C                | E      | E                 | D      | D                | D      | D                | D      |                 |      |                           |      |
|                              | Total Tenaga Kerja  |                 |        | 0,0178          | 0,0226 | 0,0150       | 0,0459 | 0,0234           | 0,0268 | 0,0148        | 0,0174 | 0,0179        | 0,0181 | 0,0200           | 0,0129 | 0,0122            | 0,0121 | 0,0165           | 0,0195 | 0,0233           | 0,0093 |                 |      |                           |      |
| INFRASTRUKTUR FISIK          | Ketersediaan        | Jalan           | 0,0138 | B               | A      | B            | D      | B                | A      | B             | B      | E             | E      | E                | D      | C                 | B      | E                | D      | C                | D      |                 |      |                           |      |
|                              |                     | Pelabuhan Laut  | 0,0141 | C               | D      | C            | B      | B                | B      | C             | C      | D             | D      | D                | C      | D                 | C      | C                | C      | C                | C      |                 |      |                           |      |
|                              |                     | Pelabuhan Udara | 0,0058 | C               | D      | C            | C      | C                | C      | C             | C      | C             | E      | E                | C      | C                 | C      | E                | D      | C                | C      |                 |      |                           |      |
|                              |                     | Telepon         | 0,0160 | C               | A      | A            | C      | D                | C      | A             | B      | A             | A      | E                | A      | A                 | B      | A                | C      | B                | B      |                 |      |                           |      |
|                              |                     | Listrik         | 0,0175 | B               | A      | D            | E      | B                | D      | A             | B      | A             | B      | E                | A      | A                 | B      | B                | C      | A                | D      |                 |      |                           |      |
|                              | Kualitas            | Jalan           | 0,0095 | C               | C      | B            | E      | B                | B      | C             | C      | C             | D      | C                | B      | B                 | C      | C                | D      | B                | C      |                 |      |                           |      |
|                              |                     | Pelabuhan Laut  | 0,0089 | A               | D      | C            | C      | B                | C      | C             | C      | D             | D      | B                | C      | D                 | C      | C                | C      | C                | B      |                 |      |                           |      |
|                              |                     | Pelabuhan Udara | 0,0073 | A               | B      | C            | B      | A                | A      | D             | C      | B             | D      | C                | B      | D                 | C      | C                | B      | B                | B      |                 |      |                           |      |
|                              |                     | Telepon         | 0,0204 | C               | B      | D            | C      | C                | C      | B             | D      | B             | B      | C                | B      | B                 | C      | B                | B      | B                | C      |                 |      |                           |      |
|                              |                     | Listrik         | 0,0139 | B               | B      | D            | E      | C                | C      | B             | D      | B             | B      | D                | B      | B                 | C      | B                | C      | B                | C      |                 |      |                           |      |
|                              | Total Infrastruktur |                 |        | 0,0342          | 0,0398 | 0,0260       | 0,0178 | 0,0309           | 0,0293 | 0,0396        | 0,0262 | 0,0348        | 0,0294 | 0,0138           | 0,0397 | 0,0363            | 0,0293 | 0,0342           | 0,0246 | 0,0379           | 0,0240 |                 |      |                           |      |
| TOTAL SCORE                  |                     |                 | 1,0000 | 0,3273          | 0,2983 | 0,1557       | 0,2936 | 0,2838           | 0,1980 | 0,2797        | 0,1380 | 0,2797        | 0,2769 | 0,1839           | 0,2757 | 0,2736            | 0,1310 | 0,2721           | 0,2308 | 0,2712           | 0,1635 |                 |      |                           |      |
| PERINGKAT                    |                     |                 |        | 1/B             | 2      | 62           | 3/B    | 4                | 29     | 5             | 76     | 5/B           | 6      | 39               | 7/B    | 8                 | 84     | 9                | 13     | 10               | 55     |                 |      |                           |      |

### Lampiran 1.3.2. Perubahan Peringkat 10 Kabupaten dari Kelompok 10 Kabupaten Peringkat Atas Pada Rating 2002

| PROPINSI              |                      |                    |        | SUMATERA UTARA |        | JAWA BARAT  |        | JAWA TENGAH |        | JAWA TENGAH   |        | BALI         |        | JAWA TIMUR    |        | JAWA TENGAH     |        | BALI        |        | KALIMANTAN TIMUR |        | KALIMANTAN TIMUR       |        |
|-----------------------|----------------------|--------------------|--------|----------------|--------|-------------|--------|-------------|--------|---------------|--------|--------------|--------|---------------|--------|-----------------|--------|-------------|--------|------------------|--------|------------------------|--------|
| KETERANGAN            |                      | KABUPATEN/KOTA     |        | KAB. DAIRI     |        | KAB. BEKASI |        | KAB. KENDAL |        | KAB. PEMALANG |        | KAB. GIANJAR |        | KAB. SIDOARJO |        | KAB. PEKALONGAN |        | KAB. BADUNG |        | KAB. BERAU       |        | KAB. KUTAI KERTANEGARA |        |
| FAKTOR                | VARIABEL             | INDIKATOR          | SKOR   | 2002           | 2003   | 2002        | 2003   | 2002        | 2003   | 2002          | 2003   | 2002         | 2003   | 2002          | 2003   | 2002            | 2003   | 2002        | 2003   | 2002             | 2003   | 2002                   | 2003   |
| KELEMBAGAAN           | Aparatur & Pelayanan | Birokrasi          | 0,0483 | A              | C      | C           | C      | B           | C      | B             | D      | A            | B      | B             | B      | C               | E      | B           | C      | B                | C      | B                      | B      |
|                       |                      | P. Wewenang        | 0,0235 | C              | A      | C           | C      | D           | E      | B             | C      | C            | A      | E             | C      | B               | D      | C           | A      | C                | D      | C                      | C      |
|                       | Perda                |                    | 0,0771 | C              | C      | D           | D      | D           | D      | C             | C      | C            | C      | B             | B      | C               | C      | C           | C      | C                | C      | D                      | D      |
|                       | Keuangan Daerah      | Retribusi-Pajak    | 0,0316 | D              | D      | B           | B      | C           | C      | C             | C      | B            | A      | C             | C      | C               | C      | A           | A      | B                | B      | B                      | B      |
|                       |                      | Anggaran Pemb.     | 0,0141 | C              | C      | B           | B      | E           | E      | E             | E      | B            | B      | C             | C      | E               | D      | A           | A      | A                | A      | A                      | A      |
|                       | Kepastian Hukum      | Konsistensi Per.   | 0,0350 | A              | B      | C           | C      | A           | C      | A             | C      | C            | C      | B             | D      | B               | D      | D           | C      | C                | D      | C                      | C      |
|                       |                      | Penegakan Hk.      | 0,0524 | A              | B      | C           | C      | A           | C      | B             | D      | C            | C      | B             | D      | B               | D      | C           | C      | C                | E      | B                      | C      |
|                       |                      | Pungli LB          | 0,0194 | B              | C      | C           | C      | B           | E      | B             | C      | C            | A      | C             | C      | C               | D      | D           | B      | C                | E      | C                      | C      |
|                       |                      | Eks-Leg            | 0,0167 | B              | C      | C           | C      | B           | A      | B             | C      | C            | C      | C             | C      | B               | C      | C           | C      | B                | C      | B                      | C      |
|                       | Total Lembaga        |                    |        | 0,0989         | 0,0684 | 0,0437      | 0,0437 | 0,0757      | 0,0378 | 0,0804        | 0,0411 | 0,0724       | 0,0815 | 0,0726        | 0,0560 | 0,0644          | 0,0343 | 0,0630      | 0,0725 | 0,0637           | 0,0444 | 0,0617                 | 0,0523 |
| SOSIAL POLITIK BUDAYA | Keamanan             | Gangg. Usaha       | 0,0523 | A              | D      | B           | E      | C           | D      | A             | D      | A            | B      | C             | C      | A               | D      | A           | C      | C                | E      | B                      | E      |
|                       |                      | Gangg. Masya.      | 0,0311 | A              | E      | B           | E      | A           | C      | A             | C      | A            | B      | B             | C      | A               | E      | B           | C      | B                | E      | A                      | E      |
|                       |                      | Kec. Aparatur      | 0,0724 | B              | A      | B           | D      | B           | C      | B             | D      | B            | B      | C             | C      | B               | C      | B           | B      | C                | D      | B                      | E      |
|                       | Sosial Politik       | Ptsp.Msy.          | 0,0120 | A              | C      | C           | C      | C           | A      | B             | C      | C            | A      | B             | A      | C               | C      | C           | C      | B                | A      | C                      | A      |
|                       |                      | KonflikMsy         | 0,0184 | A              | E      | B           | C      | A           | B      | A             | C      | B            | D      | A             | D      | A               | C      | C           | D      | C                | B      | A                      | B      |
|                       |                      | Stabilitas Politik | 0,0289 | C              | C      | B           | A      | B           | A      | B             | B      | B            | C      | C             | D      | B               | A      | B           | C      | B                | A      | B                      | A      |
|                       |                      | Unjuk Rasa         | 0,0095 | C              | D      | D           | C      | A           | A      | B             | E      | C            | E      | B             | D      | A               | E      | C           | E      | C                | A      | A                      | D      |
|                       | Budaya               | Terbuka            | 0,0086 | A              | C      | B           | A      | A           | D      | A             | C      | C            | C      | B             | C      | A               | C      | C           | C      | B                | E      | B                      | B      |
|                       |                      | Non Diskriminasi   | 0,0064 | A              | D      | B           | E      | B           | C      | B             | C      | C            | C      | D             | C      | A               | C      | C           | C      | B                | E      | B                      | C      |
|                       |                      | Adat Istiadat      | 0,0071 | C              | C      | B           | B      | A           | C      | B             | B      | C            | C      | C             | C      | B               | C      | C           | C      | C                | D      | B                      | C      |
|                       |                      | Etos Kerja         | 0,0141 | B              | C      | B           | C      | A           | C      | C             | C      | B            | C      | C             | A      | A               | C      | C           | B      | C                | E      | C                      | C      |
|                       | Total Sospolbud      |                    |        | 0,0947         | 0,0511 | 0,0720      | 0,0346 | 0,0858      | 0,0468 | 0,0973        | 0,0322 | 0,0881       | 0,0598 | 0,0502        | 0,0373 | 0,1051          | 0,0366 | 0,0753      | 0,0470 | 0,0478           | 0,0354 | 0,0873                 | 0,0328 |

|                              |                    |                 |        | SUMATERA UTARA |        | JAWA BARAT  |        | JAWA TENGAH |        | JAWA TENGAH   |        | BALI         |        | JAWA TIMUR    |        | JAWA TENGAH     |        | BALI        |        | KALIMANTAN TIMUR |        | KALIMANTAN TIMUR       |        |
|------------------------------|--------------------|-----------------|--------|----------------|--------|-------------|--------|-------------|--------|---------------|--------|--------------|--------|---------------|--------|-----------------|--------|-------------|--------|------------------|--------|------------------------|--------|
| KETERANGAN                   |                    | KABUPATEN/KOTA  |        | KAB. DAIRI     |        | KAB. BEKASI |        | KAB. KENDAL |        | KAB. PEMALANG |        | KAB. GIANYAR |        | KAB. SIDOARJO |        | KAB. PEKALONGAN |        | KAB. BADUNG |        | KAB. BERAU       |        | KAB. KUTAI KERTANEGARA |        |
| FAKTOR                       | VARIABEL           | INDIKATOR       | SKOR   | 2002           | 2003   | 2002        | 2003   | 2002        | 2003   | 2002          | 2003   | 2002         | 2003   | 2002          | 2003   | 2002            | 2003   | 2002        | 2003   | 2002             | 2003   | 2002                   | 2003   |
| EKONOMI DAERAH               | Potensi Ekonomi    | PDRB Per Kapita | 0,0481 | C              | C      | A           | A      | C           | C      | E             | E      | B            | B      | A             | A      | C               | C      | A           | A      | A                | A      | B                      | A      |
|                              |                    | Pertumbuhan     | 0,0463 | A              | A      | A           | A      | E           | E      | C             | C      | C            | C      | E             | E      | E               | D      | C           | C      | A                | A      | A                      | E      |
|                              |                    | IPM             | 0,0239 | C              | C      | C           | C      | C           | C      | C             | D      | C            | C      | B             | A      | C               | D      | C           | B      | C                | C      | C                      | C      |
|                              | Struktur Ekonomi   | NT Primer       | 0,0219 | C              | B      | E           | E      | C           | D      | C             | C      | D            | D      | D             | E      | D               | D      | D           | E      | B                | B      | B                      | B      |
|                              |                    | NT Sekunder     | 0,0151 | E              | D      | A           | A      | A           | A      | C             | C      | C            | C      | A             | A      | B               | B      | D           | D      | C                | C      | E                      | D      |
|                              |                    | NT Tersier      | 0,0123 | E              | E      | E           | E      | D           | D      | C             | C      | C            | B      | C             | C      | C               | C      | A           | A      | E                | D      | E                      | E      |
|                              | Total Ekonomi      |                 |        | 0,0387         | 0,0425 | 0,0602      | 0,0602 | 0,0248      | 0,0222 | 0,0213        | 0,0176 | 0,0297       | 0,0321 | 0,0446        | 0,0446 | 0,0207          | 0,0184 | 0,0434      | 0,0455 | 0,0623           | 0,0627 | 0,0485                 | 0,0404 |
| TENAGA KERJA & PRODUKTIVITAS | Ketersediaan T.K.  | Usia Produktif  | 0,0099 | E              | E      | C           | C      | C           | B      | D             | C      | A            | A      | A             | A      | D               | C      | A           | A      | B                | C      | C                      | C      |
|                              |                    | SLTP            | 0,0097 | C              | C      | B           | B      | D           | D      | E             | D      | C            | B      | A             | A      | D               | E      | A           | A      | B                | B      | B                      | B      |
|                              |                    | Pencari Kerja   | 0,0235 | D              | E      | C           | B      | C           | E      | A             | D      | E            | E      | C             | C      | C               | D      | D           | C      | C                | C      | C                      | B      |
|                              | Biaya T.K.         | UMP/IHK         | 0,0144 | A              | E      | E           | E      | B           | B      | A             | B      | A            | A      | A             | E      | A               | B      | A           | A      | E                | E      | E                      | E      |
|                              |                    | Upah Aktual/IHK | 0,0163 | D              | C      | B           | B      | D           | D      | D             | D      | B            | D      | B             | B      | D               | B      | D           | B      | B                | E      | E                      | E      |
|                              | Produktivitas      |                 | 0,0525 | D              | E      | A           | A      | B           | C      | D             | D      | D            | E      | C             | C      | D               | D      | D           | D      | A                | C      | C                      | C      |
|                              | Total Tenaga Kerja |                 |        | 0,0154         | 0,0094 | 0,0453      | 0,0490 | 0,0248      | 0,0157 | 0,0240        | 0,0120 | 0,0243       | 0,0168 | 0,0311        | 0,0266 | 0,0163          | 0,0183 | 0,0189      | 0,0273 | 0,0459           | 0,0172 | 0,0172                 | 0,0209 |
| INFRASTRUKTUR FISIK          | Ketersediaan       | Jalan           | 0,0138 | A              | D      | A           | B      | A           | B      | A             | B      | A            | A      | A             | B      | A               | B      | A           | A      | D                | E      | B                      | D      |
|                              |                    | Pelabuhan Laut  | 0,0141 | C              | C      | B           | A      | B           | B      | C             | D      | C            | B      | B             | B      | C               | C      | B           | B      | B                | C      | B                      | C      |
|                              |                    | Pelabuhan Udara | 0,0058 | C              | C      | C           | C      | C           | C      | C             | D      | C            | C      | C             | C      | C               | C      | C           | C      | C                | E      | C                      | C      |
|                              |                    | Telepon         | 0,0160 | C              | C      | A           | A      | A           | C      | B             | E      | B            | B      | A             | C      | B               | C      | B           | C      | D                | E      | C                      | C      |
|                              |                    | Listrik         | 0,0175 | D              | C      | B           | B      | B           | B      | D             | C      | C            | A      | C             | C      | B               | B      | C           | C      | D                | E      | D                      | C      |
|                              | Kualitas           | Jalan           | 0,0095 | D              | D      | B           | B      | C           | B      | C             | B      | B            | B      | B             | B      | C               | B      | B           | B      | C                | D      | C                      | C      |
|                              |                    | Pelabuhan Laut  | 0,0089 | C              | D      | B           | A      | C           | B      | C             | C      | C            | B      | B             | B      | C               | D      | C           | B      | C                | C      | C                      | C      |
|                              |                    | Pelabuhan Udara | 0,0073 | C              | B      | A           | A      | B           | B      | C             | B      | A            | A      | A             | B      | C               | B      | A           | A      | B                | B      | C                      | B      |
|                              |                    | Telepon         | 0,0204 | B              | C      | C           | B      | B           | C      | D             | D      | C            | B      | B             | C      | C               | B      | B           | C      | C                | D      | D                      | C      |
|                              |                    | Listrik         | 0,0139 | B              | C      | C           | B      | B           | B      | B             | C      | C            | B      | B             | C      | B               | B      | B           | C      | C                | E      | C                      | C      |
| Total Infrastruktur          |                    |                 | 0,0319 | 0,0208         | 0,0396 | 0,0458      | 0,0429 | 0,0356      | 0,0286 | 0,0202        | 0,0319 | 0,0453       | 0,0439 | 0,0298        | 0,0349 | 0,0367          | 0,0395 | 0,0328      | 0,0194 | 0,0115           | 0,0222 | 0,0228                 |        |
| TOTAL SCORE                  |                    |                 | 1,0000 | 0,2796         | 0,1922 | 0,2608      | 0,2333 | 0,2540      | 0,1581 | 0,2516        | 0,1231 | 0,2464       | 0,2355 | 0,2424        | 0,1943 | 0,2414          | 0,1443 | 0,2401      | 0,2251 | 0,2391           | 0,1712 | 0,2369                 | 0,1692 |
| PERINGKAT                    |                    |                 |        | 1              | 55     | 2           | 31     | 3           | 94     | 4             | 132    | 5            | 29     | 6             | 54     | 7               | 108    | 8           | 33     | 9                | 79     | 10                     | 80     |

### Lampiran 1.3.3. Perubahan Peringkat 10 Kabupaten dari Kelompok 10 Kabupaten Peringkat Bawah Pada Rating 2003

| PROPINSI              |                      |                    |        | NTB                  |        | JAWA<br>TIMUR     | NTB          |        | LAMPUNG               | DIY            |        | JAWA<br>TIMUR  | LAMPUNG                 |        | JAWA<br>TIMUR     | JAWA<br>TIMUR    |        | NTT                  |        |
|-----------------------|----------------------|--------------------|--------|----------------------|--------|-------------------|--------------|--------|-----------------------|----------------|--------|----------------|-------------------------|--------|-------------------|------------------|--------|----------------------|--------|
| KETERANGAN            |                      | KABUPATEN/KOTA     |        | KAB.<br>LOMBOK BARAT |        | KAB.<br>BONDOWOSO | KAB.<br>BIMA |        | KAB. LAMPUNG<br>TIMUR | KAB.<br>BANTUL |        | KAB.<br>JEMBER | KAB. LAMPUNG<br>SELATAN |        | KAB.<br>PAMEKASAN | KAB.<br>PONOROGO |        | KAB.<br>FLORES TIMUR |        |
| FAKTOR                | VARIABEL             | INDIKATOR          | SKOR   | 2003                 | 2002   | 2003              | 2003         | 2002   | 2003                  | 2002           | 2003   | 2003           | 2003                    | 2002   | 2003              | 2002             | 2003   | 2003                 | 2002   |
| KELEMBAGAAN           | Aparatur & Pelayanan | Birokrasi          | 0,0483 | D                    | D      | E                 | C            | D      | E                     | D              | D      | D              | E                       | C      | D                 | D                | E      | E                    | D      |
|                       |                      | P. Wewenang        | 0,0235 | C                    | C      | E                 | C            | D      | E                     | D              | D      | E              | D                       | C      | E                 | D                | E      | E                    | C      |
|                       | Perda                |                    | 0,0771 | D                    | D      | C                 | C            | D      | D                     | D              | C      | D              | D                       | D      | C                 | C                | D      | D                    | D      |
|                       | Keuangan Daerah      | Retribusi-Pajak    | 0,0316 | A                    | B      | C                 | B            | B      | C                     | C              | D      | D              | C                       | C      | D                 | D                | C      | C                    | C      |
|                       |                      | Anggaran Pemb.     | 0,0141 | D                    | D      | E                 | D            | D      | E                     | E              | E      | C              | D                       | D      | D                 | D                | D      | C                    | B      |
|                       | Kepastian Hukum      | Konsistensi Per.   | 0,0350 | E                    | D      | D                 | D            | C      | E                     | D              | C      | C              | E                       | D      | E                 | C                | E      | D                    | C      |
|                       |                      | Penegakan Hk.      | 0,0524 | E                    | D      | E                 | C            | D      | E                     | D              | D      | D              | E                       | C      | D                 | C                | E      | E                    | D      |
|                       |                      | Pungli LB          | 0,0194 | C                    | C      | C                 | C            | D      | C                     | D              | E      | D              | C                       | E      | C                 | D                | D      | D                    | B      |
|                       |                      | Eks-Leg            | 0,0167 | C                    | D      | C                 | C            | D      | C                     | D              | C      | B              | C                       | D      | C                 | C                | C      | C                    | D      |
|                       | Total Lembaga        |                    |        | 0,0338               | 0,0302 | 0,0328            | 0,0485       | 0,0304 | 0,0215                | 0,0237         | 0,0357 | 0,0282         | 0,0227                  | 0,0318 | 0,0332            | 0,0404           | 0,0207 | 0,0228               | 0,0349 |
| SOSIAL POLITIK BUDAYA | Keamanan             | Gangg. Usaha       | 0,0523 | C                    | C      | C                 | D            | C      | E                     | D              | D      | E              | C                       | C      | D                 | C                | D      | E                    | B      |
|                       |                      | Gangg. Masya.      | 0,0311 | C                    | E      | E                 | E            | E      | E                     | E              | E      | E              | C                       | E      | E                 | C                | E      | E                    | B      |
|                       |                      | Kec. Aparatur      | 0,0724 | D                    | D      | E                 | C            | D      | E                     | D              | E      | C              | C                       | C      | E                 | C                | E      | E                    | D      |
|                       | Sosial Politik       | Ptsp.Msy.          | 0,0120 | C                    | D      | A                 | C            | D      | C                     | D              | C      | C              | C                       | E      | C                 | D                | C      | A                    | D      |
|                       |                      | KonflikMsy         | 0,0184 | C                    | D      | A                 | D            | D      | C                     | D              | D      | C              | D                       | C      | C                 | C                | B      | C                    | B      |
|                       |                      | Stabilitas Politik | 0,0289 | B                    | C      | A                 | C            | D      | C                     | D              | C      | A              | B                       | C      | A                 | D                | A      | C                    | D      |
|                       |                      | Unjuk Rasa         | 0,0095 | B                    | D      | A                 | E            | C      | D                     | D              | E      | C              | E                       | C      | B                 | A                | A      | E                    | C      |
|                       | Budaya               | Terbuka            | 0,0086 | C                    | B      | C                 | E            | C      | D                     | E              | D      | D              | C                       | B      | E                 | C                | C      | E                    | C      |
|                       |                      | Non Diskriminasi   | 0,0064 | D                    | A      | C                 | E            | B      | D                     | D              | D      | D              | C                       | B      | C                 | D                | C      | E                    | E      |
|                       |                      | Adat Istiadat      | 0,0071 | C                    | C      | E                 | B            | B      | C                     | D              | C      | E              | C                       | C      | E                 | C                | C      | C                    | B      |
|                       |                      | Etos Kerja         | 0,0141 | D                    | B      | E                 | D            | C      | D                     | D              | C      | C              | C                       | C      | C                 | C                | C      | D                    | C      |
|                       | Total Sospolbud      |                    |        | 0,0349               | 0,0320 | 0,0425            | 0,0276       | 0,0260 | 0,0188                | 0,0177         | 0,0197 | 0,0341         | 0,0383                  | 0,0357 | 0,0293            | 0,0357           | 0,0368 | 0,0195               | 0,0431 |



| PROPINSI                        |                     |                 |        | NTB                  |        | JAWA<br>TIMUR     | NTB          |        | LAMPUNG               |        | DIY            | JAWA<br>TIMUR  | LAMPUNG                 |        | JAWA<br>TIMUR     |        | JAWA<br>TIMUR    | NTT                  |        |
|---------------------------------|---------------------|-----------------|--------|----------------------|--------|-------------------|--------------|--------|-----------------------|--------|----------------|----------------|-------------------------|--------|-------------------|--------|------------------|----------------------|--------|
| KETERANGAN                      |                     | KABUPATEN/KOTA  |        | KAB.<br>LOMBOK BARAT |        | KAB.<br>BONDOWOSO | KAB.<br>BIMA |        | KAB. LAMPUNG<br>TIMUR |        | KAB.<br>BANTUL | KAB.<br>JEMBER | KAB. LAMPUNG<br>SELATAN |        | KAB.<br>PAMEKASAN |        | KAB.<br>PONOROGO | KAB.<br>FLORES TIMUR |        |
| FAKTOR                          | VARIABEL            | INDIKATOR       | SKOR   | 2003                 | 2002   | 2003              | 2003         | 2002   | 2003                  | 2002   | 2003           | 2003           | 2003                    | 2002   | 2003              | 2002   | 2003             | 2003                 | 2002   |
| EKONOMI DAERAH                  | Potensi Ekonomi     | PDRB Per Kapita | 0,0481 | D                    | D      | E                 | D            | D      | C                     | E      | D              | D              | D                       | D      | E                 | E      | E                | E                    | E      |
|                                 |                     | Pertumbuhan     | 0,0463 | E                    | D      | D                 | E            | C      | A                     | B      | E              | C              | D                       | E      | E                 | E      | E                | E                    | C      |
|                                 |                     | IPM             | 0,0239 | E                    | E      | E                 | E            | D      | C                     | C      | B              | E              | C                       | C      | E                 | E      | D                | D                    | D      |
|                                 | Struktur Ekonomi    | NT Primer       | 0,0219 | C                    | C      | B                 | C            | C      | B                     | B      | C              | C              | B                       | B      | B                 | B      | C                | C                    | C      |
|                                 |                     | NT Sekunder     | 0,0151 | D                    | D      | D                 | D            | D      | D                     | D      | C              | D              | C                       | C      | D                 | E      | C                | D                    | E      |
|                                 |                     | NT Tersier      | 0,0123 | B                    | C      | C                 | C            | C      | D                     | D      | C              | C              | D                       | D      | D                 | D      | C                | B                    | C      |
|                                 | Total Ekonomi       |                 |        | 0,0149               | 0,0139 | 0,0159            | 0,0125       | 0,0177 | 0,0429                | 0,0243 | 0,0209         | 0,0171         | 0,0218                  | 0,0204 | 0,0134            | 0,0130 | 0,0130           | 0,0141               | 0,0151 |
| TENAGA KERJA &<br>PRODUKTIVITAS | Ketersediaan T.K.   | Usia Produktif  | 0,0099 | D                    | D      | C                 | D            | E      | C                     | A      | A              | A              | C                       | E      | C                 | B      | A                | E                    | E      |
|                                 |                     | SLTP            | 0,0097 | E                    | E      | E                 | B            | B      | B                     | A      | B              | D              | D                       | D      | E                 | D      | D                | E                    | E      |
|                                 |                     | Pencari Kerja   | 0,0235 | E                    | D      | E                 | C            | C      | D                     | A      | D              | D              | C                       | D      | D                 | D      | C                | E                    | E      |
|                                 | Biaya T.K.          | UMP/IHK         | 0,0144 | B                    | B      | D                 | B            | B      | D                     | B      | B              | B              | D                       | B      | A                 | D      | D                | D                    | A      |
|                                 |                     | Upah Aktual/IHK | 0,0163 | D                    | C      | C                 | D            | D      | B                     | E      | D              | D              | D                       | D      | D                 | C      | C                | B                    | D      |
|                                 | Produktivitas       |                 | 0,0525 | E                    | D      | E                 | E            | D      | E                     | D      | E              | E              | D                       | C      | E                 | E      | E                | E                    | D      |
|                                 | Total Tenaga Kerja  |                 |        | 0,0095               | 0,0112 | 0,0089            | 0,0141       | 0,0141 | 0,0186                | 0,0250 | 0,0144         | 0,0126         | 0,0125                  | 0,0145 | 0,0142            | 0,0102 | 0,0132           | 0,0148               | 0,0121 |
| INFRASTRUKTUR FISIK             | Ketersediaan        | Jalan           | 0,0138 | C                    | A      | C                 | E            | C      | D                     | B      | B              | B              | D                       | B      | C                 | B      | B                | D                    | C      |
|                                 |                     | Pelabuhan Laut  | 0,0141 | B                    | C      | D                 | B            | D      | E                     | C      | D              | D              | B                       | C      | D                 | C      | D                | B                    | C      |
|                                 |                     | Pelabuhan Udara | 0,0058 | C                    | D      | E                 | C            | D      | E                     | D      | C              | E              | C                       | C      | E                 | C      | D                | C                    | E      |
|                                 |                     | Telepon         | 0,0160 | C                    | B      | E                 | E            | E      | E                     | C      | E              | D              | E                       | D      | E                 | A      | D                | E                    | E      |
|                                 |                     | Listrik         | 0,0175 | E                    | E      | C                 | E            | E      | D                     | D      | C              | C              | D                       | D      | C                 | D      | C                | E                    | E      |
|                                 | Kualitas            | Jalan           | 0,0095 | B                    | C      | C                 | D            | D      | C                     | C      | B              | C              | C                       | C      | D                 | B      | C                | D                    | C      |
|                                 |                     | Pelabuhan Laut  | 0,0089 | B                    | C      | C                 | C            | C      | B                     | C      | D              | C              | B                       | C      | C                 | C      | D                | C                    | C      |
|                                 |                     | Pelabuhan Udara | 0,0073 | C                    | C      | B                 | D            | C      | D                     | C      | B              | B              | D                       | C      | B                 | C      | B                | D                    | B      |
|                                 |                     | Telepon         | 0,0204 | C                    | C      | E                 | E            | C      | E                     | D      | D              | D              | E                       | D      | E                 | D      | D                | E                    | D      |
|                                 |                     | Listrik         | 0,0139 | E                    | D      | C                 | E            | D      | E                     | E      | C              | C              | E                       | E      | C                 | D      | C                | E                    | B      |
|                                 | Total Infrastruktur |                 |        | 0,0229               | 0,0244 | 0,0152            | 0,0111       | 0,0125 | 0,0102                | 0,0199 | 0,0205         | 0,0187         | 0,0148                  | 0,0178 | 0,0140            | 0,0260 | 0,0182           | 0,0115               | 0,0181 |
| TOTAL SCORE                     |                     |                 | 1,0000 | 0,1160               | 0,1117 | 0,1153            | 0,1138       | 0,1007 | 0,1120                | 0,1106 | 0,1112         | 0,1107         | 0,1101                  | 0,1202 | 0,1041            | 0,1253 | 0,1019           | 0,0827               | 0,1251 |
| PERINGKAT                       |                     |                 |        | 136                  | 89     | 137/B             | 139          | 91     | 140                   | 90     | 141/B          | 142/B          | 143                     | 87     | 144               | 85     | 145/B            | 146                  | 85     |

### Lampiran 1.3.4. Perubahan Peringkat 10 Kabupaten dari Kelompok 10 Kabupaten Peringkat Bawah Pada Rating 2002

| PROPINSI              |                      |                    |        | N T T     |        | JAWA BARAT    |        | JAWA BARAT      |        | JAWA TIMUR     |        | N T T             |        | BENGKULU              |        | LAMPUNG              |        | SUMATERA BARAT       |        | N T B             |        | LAMPUNG            |        | N T B     |        |
|-----------------------|----------------------|--------------------|--------|-----------|--------|---------------|--------|-----------------|--------|----------------|--------|-------------------|--------|-----------------------|--------|----------------------|--------|----------------------|--------|-------------------|--------|--------------------|--------|-----------|--------|
| KETERANGAN            |                      | KABUPATEN/KOTA     |        | KAB. ENDE |        | KAB. SUMEDANG |        | KAB. TASIMALAYA |        | KAB. PAMEKASAN |        | KAB. FLORES TIMUR |        | KAB. BENGKULU SELATAN |        | KAB. LAMPUNG SELATAN |        | KAB. PESISIR SELATAN |        | KAB. LOMBOK BARAT |        | KAB. LAMPUNG TIMUR |        | KAB. BIMA |        |
| FAKTOR                | VARIABEL             | INDIKATOR          | SKOR   | 2002      | 2003   | 2002          | 2003   | 2002            | 2003   | 2002           | 2003   | 2002              | 2003   | 2002                  | 2003   | 2002                 | 2003   | 2002                 | 2003   | 2002              | 2003   | 2002               | 2003   | 2002      | 2003   |
| KELEMBAGAAN           | Aparatur & Pelayanan | Birokrasi          | 0,0483 | D         | B      | C             | C      | C               | A      | D              | D      | D                 | E      | C                     | C      | C                    | E      | D                    | B      | D                 | D      | D                  | E      | D         | C      |
|                       |                      | P. Wewenang        | 0,0235 | C         | A      | D             | C      | D               | B      | D              | E      | C                 | E      | C                     | C      | C                    | D      | D                    | D      | C                 | C      | D                  | E      | D         | C      |
|                       | Perda                |                    | 0,0771 | B         | C      | D             | D      | C               | C      | C              | C      | D                 | D      | D                     | D      | D                    | D      | D                    | D      | D                 | D      | D                  | D      | D         | C      |
|                       | Keuangan Daerah      | Retribusi-Pajak    | 0,0316 | C         | C      | C             | C      | D               | D      | D              | D      | C                 | C      | C                     | C      | C                    | C      | E                    | E      | B                 | A      | C                  | C      | B         | B      |
|                       |                      | Anggaran Pemb.     | 0,0141 | D         | D      | E             | E      | E               | E      | D              | D      | B                 | C      | D                     | E      | D                    | D      | C                    | D      | D                 | D      | E                  | E      | D         | D      |
|                       | Kepastian Hukum      | Konsistensi Per.   | 0,0350 | C         | A      | B             | C      | C               | A      | C              | E      | C                 | D      | C                     | C      | D                    | E      | E                    | B      | D                 | E      | D                  | E      | C         | D      |
|                       |                      | Penegakan Hk.      | 0,0524 | D         | A      | C             | C      | C               | A      | C              | D      | D                 | E      | C                     | B      | C                    | E      | D                    | C      | D                 | E      | D                  | E      | D         | C      |
|                       |                      | Pungli LB          | 0,0194 | B         | A      | C             | C      | C               | A      | D              | C      | B                 | D      | C                     | A      | E                    | C      | D                    | B      | C                 | C      | D                  | C      | D         | C      |
|                       |                      | Eks-Leg            | 0,0167 | D         | C      | C             | C      | C               | C      | C              | C      | D                 | C      | C                     | C      | D                    | C      | D                    | C      | D                 | C      | D                  | C      | D         | C      |
|                       | Total Lembaga        |                    |        | 0,0497    | 0,1003 | 0,0403        | 0,0377 | 0,0443          | 0,1041 | 0,0404         | 0,0332 | 0,0349            | 0,0228 | 0,0382                | 0,0532 | 0,0318               | 0,0227 | 0,0208               | 0,0467 | 0,0302            | 0,0338 | 0,0237             | 0,0215 | 0,0304    | 0,0485 |
| SOSIAL POLITIK BUDAYA | Keamanan             | Gangg. Usaha       | 0,0523 | B         | A      | C             | C      | D               | A      | C              | D      | B                 | E      | C                     | D      | C                    | C      | C                    | B      | C                 | C      | D                  | E      | C         | D      |
|                       |                      | Gangg. Masya.      | 0,0311 | C         | A      | C             | B      | C               | A      | C              | E      | B                 | E      | C                     | C      | E                    | C      | C                    | A      | E                 | C      | E                  | E      | E         | E      |
|                       |                      | Kec. Aparatur      | 0,0724 | D         | B      | D             | C      | D               | A      | C              | E      | D                 | E      | C                     | C      | C                    | C      | C                    | A      | D                 | D      | D                  | E      | D         | C      |
|                       | Sosial Politik       | Ptsp.Msy.          | 0,0120 | D         | A      | D             | C      | D               | A      | D              | C      | D                 | A      | D                     | C      | E                    | C      | D                    | C      | D                 | C      | D                  | C      | D         | C      |
|                       |                      | KonflikMsy         | 0,0184 | D         | A      | D             | C      | D               | C      | C              | C      | B                 | C      | C                     | D      | C                    | D      | C                    | D      | D                 | C      | D                  | C      | D         | D      |
|                       |                      | Stabilitas Politik | 0,0289 | D         | B      | C             | C      | C               | C      | D              | A      | D                 | C      | C                     | C      | C                    | B      | C                    | C      | C                 | B      | D                  | C      | D         | C      |
|                       |                      | Unjuk Rasa         | 0,0095 | C         | C      | C             | A      | C               | D      | A              | B      | C                 | E      | C                     | B      | C                    | E      | B                    | D      | D                 | B      | D                  | D      | C         | E      |
|                       | Budaya               | Terbuka            | 0,0086 | C         | B      | C             | E      | C               | A      | C              | E      | C                 | E      | C                     | C      | B                    | C      | B                    | A      | B                 | C      | E                  | D      | C         | E      |
|                       |                      | Non Diskriminasi   | 0,0064 | E         | A      | C             | E      | C               | A      | D              | C      | E                 | E      | C                     | C      | B                    | C      | C                    | C      | A                 | D      | D                  | D      | B         | E      |
|                       |                      | Adat Istiadat      | 0,0071 | B         | A      | D             | E      | C               | C      | C              | E      | B                 | C      | C                     | C      | C                    | C      | C                    | C      | C                 | C      | D                  | C      | B         | B      |
|                       |                      | Etos Kerja         | 0,0141 | C         | A      | C             | E      | C               | A      | C              | C      | C                 | D      | C                     | D      | C                    | C      | D                    | C      | B                 | D      | D                  | D      | C         | D      |
|                       | Total Sospolbud      |                    |        | 0,0350    | 0,1024 | 0,0279        | 0,0401 | 0,0258          | 0,1017 | 0,0357         | 0,0293 | 0,0431            | 0,0195 | 0,0353                | 0,0321 | 0,0357               | 0,0383 | 0,0369               | 0,0819 | 0,0320            | 0,0349 | 0,0177             | 0,0188 | 0,0260    | 0,0276 |

| PROPINSI                     |                    |                 |        | N T T     |        | JAWA BARAT    |        | JAWA BARAT      |        | JAWA TIMUR     |        | N T T             |        | BENGKULU              |        | LAMPUNG              |        | SUMATERA BARAT       |        | N T B             |        | LAMPUNG            |        | N T B     |        |   |
|------------------------------|--------------------|-----------------|--------|-----------|--------|---------------|--------|-----------------|--------|----------------|--------|-------------------|--------|-----------------------|--------|----------------------|--------|----------------------|--------|-------------------|--------|--------------------|--------|-----------|--------|---|
| KETERANGAN                   |                    | KABUPATEN/KOTA  |        | KAB. ENDE |        | KAB. SUMEDANG |        | KAB. TASIMALAYA |        | KAB. PAMEKASAN |        | KAB. FLORES TIMUR |        | KAB. BENGKULU SELATAN |        | KAB. LAMPUNG SELATAN |        | KAB. PESISIR SELATAN |        | KAB. LOMBOK BARAT |        | KAB. LAMPUNG TIMUR |        | KAB. BIMA |        |   |
| FAKTOR                       | VARIABEL           | INDIKATOR       | SKOR   | 2002      | 2003   | 2002          | 2003   | 2002            | 2003   | 2002           | 2003   | 2002              | 2003   | 2002                  | 2003   | 2002                 | 2003   | 2002                 | 2003   | 2002              | 2003   | 2002               | 2003   | 2002      | 2003   |   |
| EKONOMI DAERAH               | Potensi Ekonomi    | PDRB Per Kapita | 0,0481 | E         | E      | D             | D      | D               | D      | E              | E      | E                 | E      | E                     | E      | D                    | D      | C                    | C      | D                 | D      | E                  | C      | D         | D      |   |
|                              |                    | Pertumbuhan     | 0,0463 | C         | C      | E             | E      | D               | D      | E              | E      | C                 | E      | E                     | D      | E                    | D      | D                    | D      | D                 | E      | E                  | B      | A         | C      | E |
|                              |                    | IPM             | 0,0239 | D         | E      | C             | C      | C               | C      | E              | E      | D                 | D      | C                     | C      | C                    | C      | C                    | C      | E                 | E      | C                  | C      | D         | E      |   |
|                              | Struktur Ekonomi   | NT Primer       | 0,0219 | C         | C      | D             | C      | C               | D      | B              | B      | C                 | C      | C                     | C      | B                    | B      | C                    | C      | C                 | C      | B                  | B      | C         | C      |   |
|                              |                    | NT Sekunder     | 0,0151 | D         | D      | C             | C      | C               | C      | E              | D      | E                 | D      | D                     | D      | C                    | C      | C                    | C      | D                 | D      | D                  | D      | D         | D      |   |
|                              |                    | NT Tersier      | 0,0123 | C         | B      | C             | C      | C               | B      | D              | D      | C                 | B      | C                     | B      | D                    | D      | C                    | B      | C                 | B      | D                  | D      | C         | C      |   |
|                              | Total Ekonomi      |                 |        | 0,0163    | 0,0181 | 0,0155        | 0,0181 | 0,0195          | 0,0193 | 0,0130         | 0,0134 | 0,0159            | 0,0141 | 0,0154                | 0,0192 | 0,0204               | 0,0218 | 0,0227               | 0,0251 | 0,0139            | 0,0149 | 0,0243             | 0,0429 | 0,0177    | 0,0125 |   |
| TENAGA KERJA & PRODUKTIVITAS | Ketersediaan T.K.  | Usia Produktif  | 0,0099 | E         | E      | C             | A      | C               | B      | B              | C      | E                 | E      | D                     | C      | E                    | C      | E                    | D      | D                 | D      | A                  | C      | E         | D      |   |
|                              |                    | SLTP            | 0,0097 | E         | D      | D             | B      | E               | D      | E              | D      | E                 | D      | D                     | C      | D                    | D      | B                    | B      | E                 | E      | A                  | B      | B         | B      |   |
|                              |                    | Pencari Kerja   | 0,0235 | D         | D      | C             | B      | C               | C      | D              | D      | E                 | E      | E                     | D      | D                    | C      | C                    | A      | D                 | E      | A                  | D      | C         | C      |   |
|                              | Biaya T.K.         | UMP/IHK         | 0,0144 | A         | D      | C             | E      | D               | D      | D              | A      | A                 | D      | A                     | D      | B                    | D      | C                    | A      | B                 | B      | B                  | D      | B         | B      |   |
|                              |                    | Upah Aktual/IHK | 0,0163 | D         | B      | B             | B      | C               | D      | C              | D      | D                 | B      | D                     | D      | D                    | D      | D                    | B      | C                 | D      | E                  | B      | D         | D      |   |
|                              | Produktivitas      |                 | 0,0525 | E         | E      | D             | E      | D               | E      | E              | E      | D                 | E      | D                     | E      | C                    | D      | B                    | A      | D                 | E      | D                  | E      | D         | E      |   |
|                              | Total Tenaga Kerja |                 |        | 0,0124    | 0,0155 | 0,0197        | 0,0251 | 0,0121          | 0,0122 | 0,0102         | 0,0142 | 0,0126            | 0,0148 | 0,0140                | 0,0116 | 0,0145               | 0,0125 | 0,0246               | 0,0576 | 0,0112            | 0,0095 | 0,0250             | 0,0186 | 0,0141    | 0,0141 |   |
| INFRASTRUKTUR FISIK          | Ketersediaan       | Jalan           | 0,0138 | B         | D      | B             | B      | B               | C      | B              | C      | C                 | D      | C                     | D      | B                    | D      | D                    | D      | A                 | C      | B                  | D      | C         | E      |   |
|                              |                    | Pelabuhan Laut  | 0,0141 | D         | A      | C             | D      | C               | D      | C              | D      | C                 | B      | C                     | C      | C                    | B      | C                    | D      | C                 | B      | C                  | E      | D         | B      |   |
|                              |                    | Pelabuhan Udara | 0,0058 | E         | C      | C             | D      | C               | C      | C              | E      | E                 | C      | D                     | C      | C                    | C      | C                    | C      | D                 | C      | C                  | E      | D         | C      |   |
|                              |                    | Telepon         | 0,0160 | E         | C      | B             | C      | B               | A      | A              | E      | E                 | E      | C                     | D      | D                    | E      | D                    | E      | B                 | C      | C                  | E      | E         | E      |   |
|                              |                    | Listrik         | 0,0175 | E         | D      | B             | B      | B               | A      | D              | C      | E                 | E      | E                     | E      | D                    | D      | E                    | E      | E                 | E      | D                  | D      | E         | E      |   |
|                              | Kualitas           | Jalan           | 0,0095 | C         | D      | C             | C      | C               | B      | B              | D      | C                 | D      | C                     | B      | C                    | C      | C                    | B      | C                 | B      | C                  | C      | D         | D      |   |
|                              |                    | Pelabuhan Laut  | 0,0089 | C         | C      | C             | D      | C               | D      | C              | C      | C                 | C      | D                     | D      | C                    | B      | D                    | C      | C                 | B      | C                  | B      | C         | C      |   |
|                              |                    | Pelabuhan Udara | 0,0073 | B         | D      | C             | D      | C               | D      | C              | B      | B                 | D      | C                     | C      | C                    | D      | D                    | B      | C                 | C      | C                  | D      | C         | D      |   |
|                              |                    | Telepon         | 0,0204 | D         | B      | C             | B      | C               | B      | D              | E      | D                 | E      | C                     | E      | D                    | E      | D                    | E      | C                 | C      | D                  | E      | C         | E      |   |
|                              |                    | Listrik         | 0,0139 | B         | C      | D             | B      | C               | B      | D              | C      | B                 | E      | C                     | E      | E                    | E      | D                    | E      | D                 | E      | E                  | E      | D         | E      |   |
| Total Infrastruktur          |                    |                 | 0,0190 | 0,0242    | 0,0279 | 0,0304        | 0,0293 | 0,0363          | 0,0260 | 0,0140         | 0,0188 | 0,0115            | 0,0189 | 0,0144                | 0,0178 | 0,0148               | 0,0131 | 0,0134               | 0,0244 | 0,0229            | 0,0199 | 0,0102             | 0,0125 | 0,0111    |        |   |
| TOTAL SCORE                  |                    |                 | 1,0000 | 0,1324    | 0,2605 | 0,1313        | 0,1514 | 0,1310          | 0,2736 | 0,1253         | 0,1041 | 0,1253            | 0,0827 | 0,1218                | 0,1305 | 0,1202               | 0,1101 | 0,1181               | 0,2247 | 0,1117            | 0,1160 | 0,1106             | 0,1120 | 0,1007    | 0,1138 |   |
| PERINGKAT                    |                    |                 | 82     | 14        | 83     | 98            | 84     | 8               | 85     | 144            | 85     | 146               | 86     | 125                   | 87     | 143                  | 88     | 34                   | 89     | 136               | 90     | 140                | 91     | 139       |        |   |

# Lampiran 1.4. Perubahan Peringkat Kota

## Lampiran 1.4.1. Perubahan Peringkat 5 Kota dari Kelompok 5 Kota Peringkat Atas Pada Rating 2003

| PROPINSI              |                      |                              |        | RIAU       |        | JAWA BARAT   |        | JAWA TIMUR  |        | BANTEN       | SUMATERA BARAT   |        |
|-----------------------|----------------------|------------------------------|--------|------------|--------|--------------|--------|-------------|--------|--------------|------------------|--------|
| KETERANGAN            |                      | KABUPATEN/KOTA               |        | KOTA BATAM |        | KOTA CIREBON |        | KOTA KEDIRI |        | KOTA CILEGON | KOTA SAWAH LUNTO |        |
| FAKTOR                | VARIABEL             | INDIKATOR                    | SKOR   | 2003       | 2002   | 2003         | 2002   | 2003        | 2002   | 2003         | 2003             | 2002   |
| KELEMBAGAAN           | Aparatur & Pelayanan | Pelayanan Birokrasi          | 0,0483 | C          | B      | B            | C      | C           | D      | B            | C                | B      |
|                       |                      | Penggunaan Wewenang          | 0,0235 | B          | C      | C            | D      | C           | D      | C            | B                | E      |
|                       | Perda                |                              | 0,0771 | D          | D      | D            | D      | D           | D      | C            | C                | C      |
|                       | Keuangan Daerah      | Retribusi-Pajak              | 0,0316 | B          | B      | C            | C      | B           | B      | A            | C                | C      |
|                       |                      | Anggaran Pembangunan         | 0,0141 | A          | A      | C            | C      | D           | D      | C            | C                | C      |
|                       | Kepastian Hukum      | Konsistensi Perundangan      | 0,0350 | C          | B      | C            | C      | B           | B      | C            | C                | A      |
|                       |                      | Penegakan Hukum              | 0,0524 | B          | C      | B            | C      | D           | C      | C            | C                | A      |
|                       |                      | Pungli di Luar Birokrasi     | 0,0194 | C          | C      | C            | C      | B           | B      | C            | A                | A      |
|                       |                      | Hubungan Esekutif-Legeslatif | 0,0167 | C          | B      | C            | C      | A           | B      | C            | B                | A      |
|                       | Total Lembaga        |                              |        | 0,0571     | 0,0577 | 0,0536       | 0,0376 | 0,0487      | 0,0448 | 0,0637       | 0,0590           | 0,0922 |
| SOSIAL POLITIK BUDAYA | Keamanan             | Gangguan Usaha               | 0,0523 | B          | B      | C            | D      | C           | B      | D            | A                | B      |
|                       |                      | Gangguan Masya.              | 0,0311 | C          | B      | B            | C      | C           | A      | D            | B                | A      |
|                       |                      | Kecepatan Aparatur           | 0,0724 | B          | B      | B            | D      | B           | C      | C            | B                | B      |
|                       | Sosial Politik       | Partisipasi Masyarakat       | 0,0120 | C          | C      | B            | D      | C           | B      | C            | B                | B      |
|                       |                      | Konflik Masyarakat           | 0,0184 | A          | B      | C            | D      | A           | A      | D            | A                | A      |
|                       |                      | Stabilitas Politik           | 0,0289 | A          | C      | A            | C      | A           | D      | C            | C                | C      |
|                       |                      | Unjuk Rasa                   | 0,0095 | B          | C      | C            | C      | B           | A      | B            | A                | A      |
|                       | Budaya               | Terbuka                      | 0,0086 | D          | B      | C            | C      | C           | B      | E            | B                | A      |
|                       |                      | Non Diskriminatif            | 0,0064 | C          | B      | C            | C      | D           | D      | E            | B                | A      |
|                       |                      | Adat Istiadat                | 0,0071 | C          | B      | C            | C      | C           | B      | C            | C                | A      |
|                       |                      | Etos Kerja                   | 0,0141 | C          | B      | C            | C      | C           | C      | E            | E                | B      |
|                       | Total Sospolbud      |                              |        | 0,0708     | 0,0681 | 0,0590       | 0,0258 | 0,0618      | 0,0680 | 0,0286       | 0,0830           | 0,0896 |

| PROPINSI                     |                     |                       |        | RIAU       |        | JAWA BARAT   |        | JAWA TIMUR  |        | BANTEN       | SUMATERA BARAT   |        |
|------------------------------|---------------------|-----------------------|--------|------------|--------|--------------|--------|-------------|--------|--------------|------------------|--------|
| KETERANGAN                   |                     | KABUPATEN/KOTA        |        | KOTA BATAM |        | KOTA CIREBON |        | KOTA KEDIRI |        | KOTA CILEGON | KOTA SAWAH LUNTO |        |
| FAKTOR                       | VARIABEL            | INDIKATOR             | SKOR   | 2003       | 2002   | 2003         | 2002   | 2003        | 2002   | 2003         | 2003             | 2002   |
| EKONOMI DAERAH               | Potensi Ekonomi     | PDRB Per Kapita       | 0,0481 | A          | A      | A            | A      | A           | A      | A            | A                | A      |
|                              |                     | Pertumbuhan           | 0,0463 | A          | A      | A            | A      | A           | A      | A            | E                | E      |
|                              |                     | IPM                   | 0,0239 | A          | B      | A            | C      | B           | C      | B            | B                | C      |
|                              | Struktur Ekonomi    | Nilai Tambah Primer   | 0,0219 | E          | E      | E            | E      | E           | E      | E            | C                | B      |
|                              |                     | Nilai Tambah Sekunder | 0,0151 | A          | A      | A            | A      | A           | A      | A            | C                | D      |
|                              |                     | Nilai Tambah Tersier  | 0,0123 | E          | E      | B            | C      | E           | E      | E            | C                | C      |
|                              | Total Ekonomi       |                       |        | 0,0637     | 0,0630 | 0,0676       | 0,0617 | 0,0630      | 0,0602 | 0,0630       | 0,0426           | 0,0419 |
| TENAGA KERJA & PRODUKTIVITAS | Ketersediaan T.K.   | Usia Produktif        | 0,0099 | B          | A      | C            | A      | A           | A      | C            | C                | D      |
|                              |                     | SLTP                  | 0,0097 | A          | A      | A            | A      | A           | C      | C            | B                | C      |
|                              |                     | Pencari Kerja         | 0,0235 | D          | C      | A            | C      | B           | B      | A            | A                | D      |
|                              | Biaya T.K.          | UMP/IHK               | 0,0144 | E          | C      | B            | A      | A           | B      | E            | A                | C      |
|                              |                     | Upah Aktual/IHK       | 0,0163 | B          | D      | B            | B      | B           | B      | D            | D                | B      |
|                              | Produktivitas       |                       | 0,0525 | A          | A      | A            | A      | A           | A      | A            | D                | B      |
|                              | Total Tenaga Kerja  |                       |        | 0,0448     | 0,0412 | 0,0554       | 0,0518 | 0,0555      | 0,0517 | 0,0465       | 0,0267           | 0,0305 |
| INFRASTRUKTUR FISIK          | Ketersediaan        | Jalan                 | 0,0138 | B          | A      | B            | A      | B           | A      | A            | C                | A      |
|                              |                     | Pelabuhan Laut        | 0,0141 | A          | B      | B            | B      | C           | C      | A            | C                | C      |
|                              |                     | Pelabuhan Udara       | 0,0058 | B          | B      | B            | B      | B           | B      | B            | B                | B      |
|                              |                     | Telepon               | 0,0160 | A          | A      | B            | A      | B           | A      | C            | C                | E      |
|                              |                     | Listrik               | 0,0175 | B          | B      | B            | B      | B           | D      | C            | C                | D      |
|                              | Kualitas            | Jalan                 | 0,0095 | C          | B      | C            | C      | C           | B      | B            | B                | B      |
|                              |                     | Pelabuhan Laut        | 0,0089 | A          | B      | C            | C      | B           | C      | A            | C                | B      |
|                              |                     | Pelabuhan Udara       | 0,0073 | A          | A      | C            | C      | C           | C      | B            | C                | A      |
|                              |                     | Telepon               | 0,0204 | B          | B      | C            | C      | B           | C      | B            | C                | C      |
|                              |                     | Listrik               | 0,0139 | B          | B      | B            | C      | C           | B      | C            | C                | B      |
|                              | Total Infrastruktur |                       |        | 0,0441     | 0,0467 | 0,0328       | 0,0351 | 0,0351      | 0,0347 | 0,0382       | 0,0247           | 0,0309 |
| TOTAL SCORE                  |                     |                       | 1,0000 | 0,2805     | 0,2767 | 0,2684       | 0,2120 | 0,2641      | 0,2594 | 0,2400       | 0,2360           | 0,2851 |
| PERINGKAT                    |                     |                       |        | 1          | 4      | 2            | 23     | 3           | 6      | 4            | 5                | 2      |

### Lampiran 1.4.2. Perubahan Peringkat 5 Kota dari Kelompok 5 Kota Peringkat Atas Pada Rating 2002

| PROPINSI              |                      |                              |        | JAWA TENGAH   |        | KALIMANTAN TIMUR |        | SUMATERA BARAT   |        | JAWA TENGAH |        | RIAUI      |        | BANTEN         |        |
|-----------------------|----------------------|------------------------------|--------|---------------|--------|------------------|--------|------------------|--------|-------------|--------|------------|--------|----------------|--------|
| KETERANGAN            |                      | KABUPATEN/KOTA               |        | KOTA SEMARANG |        | KOTA BALIKPAPAN  |        | KOTA SAWAH LUNTO |        | KOTA TEGAL  |        | KOTA BATAM |        | KOTA TANGERANG |        |
| FAKTOR                | VARIABEL             | INDIKATOR                    | SKOR   | 2002          | 2003   | 2002             | 2003   | 2002             | 2003   | 2002        | 2003   | 2002       | 2003   | 2002           | 2003   |
| KELEMBAGAAN           | Aparatur & Pelayanan | Pelayanan Birokrasi          | 0,0483 | B             | C      | B                | C      | B                | C      | B           | B      | B          | C      | C              | D      |
|                       |                      | Penggunaan Wewenang          | 0,0235 | C             | E      | C                | D      | E                | B      | B           | C      | C          | B      | C              | E      |
|                       | Perda                |                              | 0,0771 | B             | B      | D                | D      | C                | C      | C           | B      | D          | D      | C              | C      |
|                       | Keuangan Daerah      | Retribusi-Pajak              | 0,0316 | B             | B      | B                | B      | C                | C      | E           | E      | B          | B      | B              | A      |
|                       |                      | Anggaran Pembangunan         | 0,0141 | A             | A      | A                | A      | C                | C      | B           | B      | A          | A      | B              | B      |
|                       | Kepastian Hukum      | Konsistensi Perundangan      | 0,0350 | C             | C      | B                | D      | A                | C      | B           | B      | B          | C      | C              | D      |
|                       |                      | Penegakan Hukum              | 0,0524 | C             | D      | B                | C      | A                | C      | B           | B      | C          | B      | C              | E      |
|                       |                      | Pungli di Luar Birokrasi     | 0,0194 | B             | D      | C                | D      | A                | A      | B           | C      | C          | C      | C              | E      |
|                       |                      | Hubungan Esekutif-Legeslatif | 0,0167 | B             | C      | C                | C      | A                | B      | B           | C      | B          | C      | B              | C      |
|                       | Total Lembaga        |                              |        | 0,0733        | 0,0559 | 0,0645           | 0,0401 | 0,0922           | 0,0590 | 0,0731      | 0,0731 | 0,0577     | 0,0571 | 0,0551         | 0,0433 |
| SOSIAL POLITIK BUDAYA | Keamanan             | Gangguan Usaha               | 0,0523 | A             | C      | B                | E      | B                | A      | A           | C      | B          | B      | B              | D      |
|                       |                      | Gangguan Masya.              | 0,0311 | A             | C      | C                | E      | A                | B      | A           | C      | B          | C      | B              | D      |
|                       |                      | Kecepatan Aparatur           | 0,0724 | B             | E      | B                | C      | B                | B      | B           | C      | B          | B      | B              | C      |
|                       | Sosial Politik       | Partisipasi Masyarakat       | 0,0120 | B             | C      | C                | A      | B                | B      | B           | C      | C          | C      | C              | B      |
|                       |                      | Konflik Masyarakat           | 0,0184 | A             | B      | B                | A      | A                | A      | B           | C      | B          | A      | B              | C      |
|                       |                      | Stabilitas Politik           | 0,0289 | B             | A      | B                | B      | C                | C      | B           | B      | C          | A      | C              | C      |
|                       |                      | Unjuk Rasa                   | 0,0095 | C             | C      | B                | D      | A                | A      | A           | A      | C          | B      | C              | C      |
|                       | Budaya               | Terbuka                      | 0,0086 | A             | D      | B                | E      | A                | B      | A           | C      | B          | D      | A              | D      |
|                       |                      | Non Diskriminatif            | 0,0064 | A             | C      | A                | E      | A                | B      | A           | C      | B          | C      | B              | C      |
|                       |                      | Adat Istiadat                | 0,0071 | A             | C      | B                | C      | A                | C      | A           | C      | B          | C      | B              | C      |
|                       |                      | Etos Kerja                   | 0,0141 | A             | D      | B                | D      | B                | E      | A           | C      | B          | C      | B              | D      |
|                       | Total Sospolbud      |                              |        | 0,1033        | 0,0358 | 0,0709           | 0,0391 | 0,0896           | 0,0830 | 0,1023      | 0,0442 | 0,0681     | 0,0708 | 0,0697         | 0,0307 |

| PROPINSI                     |                     |                       |        | JAWA TENGAH   |        | KALIMANTAN TIMUR |        | SUMATERA BARAT   |        | JAWA TENGAH |        | RIAU       |        | BANTEN         |        |
|------------------------------|---------------------|-----------------------|--------|---------------|--------|------------------|--------|------------------|--------|-------------|--------|------------|--------|----------------|--------|
| KETERANGAN                   |                     | KABUPATEN/KOTA        |        | KOTA SEMARANG |        | KOTA BALIKPAPAN  |        | KOTA SAWAH LUNTO |        | KOTA TEGAL  |        | KOTA BATAM |        | KOTA TANGERANG |        |
| FAKTOR                       | VARIABEL            | INDIKATOR             | SKOR   | 2002          | 2003   | 2002             | 2003   | 2002             | 2003   | 2002        | 2003   | 2002       | 2003   | 2002           | 2003   |
| EKONOMI DAERAH               | Potensi Ekonomi     | PDRB Per Kapita       | 0,0481 | A             | A      | A                | A      | A                | A      | C           | D      | A          | A      | A              | A      |
|                              |                     | Pertumbuhan           | 0,0463 | C             | C      | A                | A      | E                | E      | C           | C      | A          | A      | C              | C      |
|                              |                     | IPM                   | 0,0239 | B             | A      | B                | A      | C                | B      | C           | B      | B          | A      | C              | A      |
|                              | Struktur Ekonomi    | Nilai Tambah Primer   | 0,0219 | E             | E      | D                | E      | B                | C      | C           | E      | E          | E      | E              | E      |
|                              |                     | Nilai Tambah Sekunder | 0,0151 | B             | B      | A                | A      | D                | C      | B           | C      | A          | A      | A              | A      |
|                              |                     | Nilai Tambah Tersier  | 0,0123 | A             | A      | C                | C      | C                | C      | A           | B      | E          | E      | C              | C      |
|                              | Total Ekonomi       |                       |        | 0,0488        | 0,0495 | 0,0652           | 0,0652 | 0,0419           | 0,0426 | 0,0308      | 0,0246 | 0,0630     | 0,0637 | 0,0457         | 0,0492 |
| TENAGA KERJA & PRODUKTIVITAS | Ketersediaan T.K.   | Usia Produktif        | 0,0099 | A             | A      | A                | B      | D                | C      | B           | C      | A          | B      | A              | B      |
|                              |                     | SLTP                  | 0,0097 | A             | A      | A                | A      | C                | B      | C           | B      | A          | A      | A              | A      |
|                              |                     | Pencari Kerja         | 0,0235 | A             | B      | A                | A      | D                | A      | A           | C      | C          | D      | A              | C      |
|                              | Biaya T.K.          | UMP/IHK               | 0,0144 | B             | A      | E                | E      | C                | A      | A           | B      | C          | E      | E              | E      |
|                              |                     | Upah Aktual/IHK       | 0,0163 | B             | B      | E                | E      | B                | D      | B           | D      | D          | B      | D              | E      |
|                              | Produktivitas       |                       | 0,0525 | B             | D      | A                | A      | B                | D      | C           | C      | A          | A      | A              | C      |
|                              | Total Tenaga Kerja  |                       |        | 0,0436        | 0,0310 | 0,0481           | 0,0472 | 0,0305           | 0,0267 | 0,0377      | 0,0192 | 0,0412     | 0,0448 | 0,0487         | 0,0183 |
| INFRASTRUKTUR FISIK          | Ketersediaan        | Jalan                 | 0,0138 | A             | A      | A                | A      | A                | C      | A           | A      | A          | B      | A              | A      |
|                              |                     | Pelabuhan Laut        | 0,0141 | A             | B      | B                | B      | C                | C      | C           | B      | B          | A      | B              | C      |
|                              |                     | Pelabuhan Udara       | 0,0058 | B             | B      | B                | B      | B                | B      | B           | D      | B          | B      | B              | B      |
|                              |                     | Telepon               | 0,0160 | A             | B      | B                | C      | E                | C      | B           | B      | A          | A      | A              | B      |
|                              |                     | Listrik               | 0,0175 | C             | C      | D                | D      | D                | C      | D           | B      | B          | B      | C              | C      |
|                              | Kualitas            | Jalan                 | 0,0095 | B             | B      | B                | B      | B                | B      | C           | B      | B          | C      | B              | B      |
|                              |                     | Pelabuhan Laut        | 0,0089 | A             | B      | B                | C      | B                | C      | B           | C      | B          | A      | A              | C      |
|                              |                     | Pelabuhan Udara       | 0,0073 | A             | A      | A                | B      | A                | C      | C           | D      | A          | A      | A              | A      |
|                              |                     | Telepon               | 0,0204 | B             | B      | B                | C      | C                | C      | B           | C      | B          | B      | B              | C      |
|                              |                     | Listrik               | 0,0139 | B             | B      | C                | C      | B                | C      | B           | C      | B          | B      | B              | C      |
|                              | Total Infrastruktur |                       |        | 0,0456        | 0,0412 | 0,0364           | 0,0289 | 0,0309           | 0,0247 | 0,0361      | 0,0322 | 0,0467     | 0,0441 | 0,0443         | 0,0319 |
| TOTAL SCORE                  |                     |                       | 1,0000 | 0,3146        | 0,2134 | 0,2851           | 0,2205 | 0,2851           | 0,2360 | 0,2800      | 0,1933 | 0,2767     | 0,2805 | 0,2635         | 0,1734 |
| PERINGKAT                    |                     |                       | 1      | 10            | 2      | 7                | 2      | 5                | 3      | 24          | 4      | 1          | 5      | 33             |        |

### Lampiran 1.4.3. Perubahan Peringkat 5 Kota dari Kelompok 5 Kota Peringkat Bawah Pada Rating 2003

| PROPINSI              |                      |                              |        | JAWA BARAT    |        | BENGKULU      |        | BANGKA BELITUNG     |        | JAWA TENGAH     |        | JAWA BARAT  |        |
|-----------------------|----------------------|------------------------------|--------|---------------|--------|---------------|--------|---------------------|--------|-----------------|--------|-------------|--------|
| KETERANGAN            |                      | KABUPATEN/KOTA               |        | KOTA SUKABUMI |        | KOTA BENGKULU |        | KOTA PANGKAL PINANG |        | KOTA PEKALONGAN |        | KOTA BEKASI |        |
| FAKTOR                | VARIABEL             | INDIKATOR                    | SKOR   | 2003          | 2002   | 2003          | 2002   | 2003                | 2002   | 2003            | 2002   | 2003        | 2002   |
| KELEMBAGAAN           | Aparatur & Pelayanan | Pelayanan Birokrasi          | 0,0483 | C             | C      | C             | C      | C                   | C      | D               | C      | E           | B      |
|                       |                      | Penggunaan Wewenang          | 0,0235 | D             | D      | C             | C      | C                   | C      | D               | B      | E           | C      |
|                       | Perda                |                              | 0,0771 | C             | C      | C             | C      | D                   | D      | C               | C      | C           | B      |
|                       | Keuangan Daerah      | Retribusi-Pajak              | 0,0316 | E             | E      | C             | C      | C                   | C      | B               | B      | C           | C      |
|                       |                      | Anggaran Pembangunan         | 0,0141 | C             | C      | D             | D      | C                   | C      | B               | C      | B           | B      |
|                       | Kepastian Hukum      | Konsistensi Perundangan      | 0,0350 | D             | B      | D             | C      | E                   | D      | D               | B      | E           | C      |
|                       |                      | Penegakan Hukum              | 0,0524 | C             | C      | C             | C      | D                   | D      | D               | B      | E           | C      |
|                       |                      | Pungli di Luar Birokrasi     | 0,0194 | E             | C      | C             | C      | C                   | D      | E               | C      | E           | C      |
|                       |                      | Hubungan Esekutif-Legeslatif | 0,0167 | C             | B      | B             | C      | C                   | C      | C               | B      | C           | C      |
|                       | Total Lembaga        |                              |        | 0,0397        | 0,0500 | 0,0466        | 0,0483 | 0,0293              | 0,0292 | 0,0407          | 0,0690 | 0,0325      | 0,0640 |
| SOSIAL POLITIK BUDAYA | Keamanan             | Gangguan Usaha               | 0,0523 | E             | B      | E             | C      | C                   | C      | D               | A      | D           | B      |
|                       |                      | Gangguan Masya.              | 0,0311 | E             | B      | D             | C      | D                   | C      | D               | A      | E           | B      |
|                       |                      | Kecepatan Aparatur           | 0,0724 | C             | C      | C             | C      | C                   | C      | D               | B      | D           | B      |
|                       | Sosial Politik       | Partisipasi Masyarakat       | 0,0120 | A             | D      | C             | D      | C                   | C      | C               | C      | C           | C      |
|                       |                      | Konflik Masyarakat           | 0,0184 | A             | B      | C             | C      | D                   | C      | D               | A      | C           | B      |
|                       |                      | Stabilitas Politik           | 0,0289 | B             | C      | A             | C      | B                   | C      | B               | E      | C           | B      |
|                       |                      | Unjuk Rasa                   | 0,0095 | D             | B      | C             | C      | C                   | C      | E               | A      | D           | D      |
|                       | Budaya               | Terbuka                      | 0,0086 | E             | B      | D             | C      | C                   | B      | B               | A      | C           | E      |
|                       |                      | Non Diskriminatif            | 0,0064 | E             | C      | C             | C      | B                   | B      | C               | A      | E           | B      |
|                       |                      | Adat Istiadat                | 0,0071 | C             | C      | D             | C      | D                   | B      | C               | B      | C           | B      |
|                       |                      | Etos Kerja                   | 0,0141 | D             | C      | E             | C      | E                   | C      | C               | A      | D           | B      |
|                       | Total Sospolbud      |                              |        | 0,0391        | 0,0538 | 0,0343        | 0,0353 | 0,0365              | 0,0389 | 0,0299          | 0,0969 | 0,0220      | 0,0695 |



| PROPINSI                     |                     |                       |        | JAWA BARAT    |        | BENGKULU      |        | BANGKA BELITUNG     |        | JAWA TENGAH     |        | JAWA BARAT  |        |
|------------------------------|---------------------|-----------------------|--------|---------------|--------|---------------|--------|---------------------|--------|-----------------|--------|-------------|--------|
| KETERANGAN                   |                     | KABUPATEN/KOTA        |        | KOTA SUKABUMI |        | KOTA BENGKULU |        | KOTA PANGKAL PINANG |        | KOTA PEKALONGAN |        | KOTA BEKASI |        |
| FAKTOR                       | VARIABEL            | INDIKATOR             | SKOR   | 2003          | 2002   | 2003          | 2002   | 2003                | 2002   | 2003            | 2002   | 2003        | 2002   |
| EKONOMI DAERAH               | Potensi Ekonomi     | PDRB Per Kapita       | 0,0481 | C             | C      | C             | C      | C                   | C      | D               | C      | B           | B      |
|                              |                     | Pertumbuhan           | 0,0463 | E             | E      | C             | B      | B                   | B      | D               | D      | E           | E      |
|                              |                     | IPM                   | 0,0239 | B             | C      | A             | B      | B                   | C      | C               | C      | A           | C      |
|                              | Struktur Ekonomi    | Nilai Tambah Primer   | 0,0219 | E             | E      | E             | D      | D                   | C      | C               | C      | E           | E      |
|                              |                     | Nilai Tambah Sekunder | 0,0151 | D             | D      | D             | D      | C                   | C      | B               | B      | A           | A      |
|                              |                     | Nilai Tambah Tersier  | 0,0123 | A             | A      | A             | A      | A                   | A      | B               | C      | C           | C      |
|                              | Total Ekonomi       |                       |        | 0,0224        | 0,0196 | 0,0277        | 0,0348 | 0,0361              | 0,0359 | 0,0239          | 0,0247 | 0,0325      | 0,0290 |
| TENAGA KERJA & PRODUKTIVITAS | Ketersediaan T.K.   | Usia Produktif        | 0,0099 | B             | A      | C             | C      | B                   | C      | C               | C      | B           | A      |
|                              |                     | SLTP                  | 0,0097 | A             | A      | A             | A      | C                   | C      | B               | B      | A           | A      |
|                              |                     | Pencari Kerja         | 0,0235 | A             | A      | B             | C      | C                   | C      | C               | C      | C           | A      |
|                              | Biaya T.K.          | UMP/IHK               | 0,0144 | A             | B      | D             | A      | A                   | B      | B               | A      | E           | E      |
|                              |                     | Upah Aktual/IHK       | 0,0163 | D             | B      | B             | D      | E                   | B      | B               | B      | E           | E      |
|                              | Produktivitas       |                       | 0,0525 | E             | D      | D             | D      | C                   | C      | D               | D      | C           | B      |
|                              | Total Tenaga Kerja  |                       |        | 0,0269        | 0,0324 | 0,0253        | 0,0190 | 0,0221              | 0,0258 | 0,0222          | 0,0253 | 0,0183      | 0,0348 |
| INFRASTRUKTUR FISIK          | Ketersediaan        | Jalan                 | 0,0138 | B             | A      | C             | A      | C                   | E      | A               | A      | B           | A      |
|                              |                     | Pelabuhan Laut        | 0,0141 | C             | C      | C             | C      | A                   | C      | C               | C      | C           | B      |
|                              |                     | Pelabuhan Udara       | 0,0058 | B             | B      | B             | D      | B                   | B      | D               | B      | B           | B      |
|                              |                     | Telepon               | 0,0160 | C             | A      | C             | C      | E                   | C      | C               | B      | B           | A      |
|                              |                     | Listrik               | 0,0175 | D             | C      | E             | E      | D                   | D      | C               | D      | C           | B      |
|                              | Kualitas            | Jalan                 | 0,0095 | B             | B      | B             | C      | B                   | C      | C               | B      | C           | B      |
|                              |                     | Pelabuhan Laut        | 0,0089 | D             | C      | D             | D      | B                   | C      | C               | C      | C           | B      |
|                              |                     | Pelabuhan Udara       | 0,0073 | C             | C      | C             | C      | B                   | B      | D               | C      | B           | A      |
|                              |                     | Telepon               | 0,0204 | C             | C      | D             | C      | E                   | C      | C               | C      | B           | C      |
|                              |                     | Listrik               | 0,0139 | C             | B      | E             | C      | E                   | D      | C               | B      | C           | C      |
|                              | Total Infrastruktur |                       |        | 0,0243        | 0,0365 | 0,0182        | 0,0237 | 0,0202              | 0,0192 | 0,0259          | 0,0320 | 0,0313      | 0,0396 |
| TOTAL SCORE                  |                     |                       | 1,0000 | 0,1524        | 0,1923 | 0,1521        | 0,1611 | 0,1442              | 0,1490 | 0,1426          | 0,2479 | 0,1366      | 0,2369 |
| PERINGKAT                    |                     |                       |        | 39            | 28     | 40            | 34     | 41                  | 36     | 42              | 10     | 43          | 13     |

### Lampiran 1.4.4. Perubahan Peringkat 5 Kota dari Kelompok 5 Kota Peringkat Bawah Pada Rating 2002

| PROPINSI              |                      |                              |        | JAWA TIMUR     |        | SUMATERA UTARA |        | BENGKULU      |        | JAWA TIMUR       |        | BANGKA BELITUNG     |        |
|-----------------------|----------------------|------------------------------|--------|----------------|--------|----------------|--------|---------------|--------|------------------|--------|---------------------|--------|
| KETERANGAN            |                      | KABUPATEN/KOTA               |        | KOTA MOJOKERTO |        | KOTA BINJAI    |        | KOTA BENGKULU |        | KOTA PROBOLINGGO |        | KOTA PANGKAL PINANG |        |
| FAKTOR                | VARIABEL             | INDIKATOR                    | SKOR   | 2002           | 2003   | 2002           | 2003   | 2002          | 2003   | 2002             | 2003   | 2002                | 2003   |
| KELEMBAGAAN           | Aparatur & Pelayanan | Pelayanan Birokrasi          | 0,0483 | C              | B      | C              | E      | C             | C      | D                | B      | C                   | C      |
|                       |                      | Penggunaan Wewenang          | 0,0235 | D              | A      | D              | D      | C             | C      | D                | D      | C                   | C      |
|                       | Perda                |                              | 0,0771 | C              | C      | C              | C      | C             | C      | D                | D      | D                   | D      |
|                       | Keuangan Daerah      | Retribusi-Pajak              | 0,0316 | C              | C      | C              | C      | C             | C      | C                | C      | C                   | C      |
|                       |                      | Anggaran Pembangunan         | 0,0141 | C              | C      | C              | C      | D             | D      | C                | C      | C                   | C      |
|                       | Kepastian Hukum      | Konsistensi Perundangan      | 0,0350 | C              | C      | C              | E      | C             | D      | C                | C      | D                   | E      |
|                       |                      | Penegakan Hukum              | 0,0524 | C              | B      | D              | D      | C             | C      | C                | C      | D                   | D      |
|                       |                      | Pungli di Luar Birokrasi     | 0,0194 | D              | A      | C              | C      | C             | C      | D                | D      | D                   | C      |
|                       |                      | Hubungan Esekutif-Legeslatif | 0,0167 | C              | C      | C              | C      | C             | B      | C                | C      | C                   | C      |
|                       | Total Lembaga        |                              |        | 0,0464         | 0,0801 | 0,0441         | 0,0353 | 0,0483        | 0,0466 | 0,0312           | 0,0407 | 0,0292              | 0,0293 |
| SOSIAL POLITIK BUDAYA | Keamanan             | Gangguan Usaha               | 0,0523 | C              | D      | D              | D      | C             | E      | C                | C      | C                   | C      |
|                       |                      | Gangguan Masya.              | 0,0311 | C              | D      | C              | D      | C             | D      | C                | C      | C                   | D      |
|                       |                      | Kecepatan Aparatur           | 0,0724 | C              | C      | C              | C      | C             | C      | C                | D      | C                   | C      |
|                       | Sosial Politik       | Partisipasi Masyarakat       | 0,0120 | C              | C      | D              | A      | D             | C      | C                | A      | C                   | C      |
|                       |                      | Konflik Masyarakat           | 0,0184 | C              | A      | C              | A      | C             | C      | C                | D      | C                   | D      |
|                       |                      | Stabilitas Politik           | 0,0289 | C              | A      | C              | D      | C             | A      | C                | C      | C                   | B      |
|                       |                      | Unjuk Rasa                   | 0,0095 | B              | B      | C              | C      | C             | C      | B                | C      | C                   | C      |
|                       | Budaya               | Terbuka                      | 0,0086 | C              | C      | C              | E      | C             | D      | C                | C      | B                   | C      |
|                       |                      | Non Diskriminatif            | 0,0064 | C              | C      | C              | D      | C             | C      | C                | C      | B                   | B      |
|                       |                      | Adat Istiadat                | 0,0071 | D              | B      | C              | C      | C             | D      | D                | C      | B                   | D      |
|                       |                      | Etos Kerja                   | 0,0141 | C              | B      | C              | D      | C             | E      | C                | D      | C                   | E      |
|                       | Total Sospolbud      |                              |        | 0,0365         | 0,0497 | 0,0325         | 0,0349 | 0,0353        | 0,0343 | 0,0365           | 0,0296 | 0,0389              | 0,0365 |

| PROPINSI                     |                     |                       |        | JAWA TIMUR     |        | SUMATERA UTARA |        | BENGKULU      |        | JAWA TIMUR       |        | BANGKA BELITUNG     |        |
|------------------------------|---------------------|-----------------------|--------|----------------|--------|----------------|--------|---------------|--------|------------------|--------|---------------------|--------|
| KETERANGAN                   |                     | KABUPATEN/KOTA        |        | KOTA MOJOKERTO |        | KOTA BINJAI    |        | KOTA BENGKULU |        | KOTA PROBOLINGGO |        | KOTA PANGKAL PINANG |        |
| FAKTOR                       | VARIABEL            | INDIKATOR             | SKOR   | 2002           | 2003   | 2002           | 2003   | 2002          | 2003   | 2002             | 2003   | 2002                | 2003   |
| EKONOMI DAERAH               | Potensi Ekonomi     | PDRB Per Kapita       | 0,0481 | C              | C      | C              | C      | C             | C      | B                | B      | C                   | C      |
|                              |                     | Pertumbuhan           | 0,0463 | C              | C      | D              | C      | B             | C      | E                | D      | B                   | B      |
|                              |                     | IPM                   | 0,0239 | C              | A      | C              | B      | B             | A      | C                | C      | C                   | B      |
|                              | Struktur Ekonomi    | Nilai Tambah Primer   | 0,0219 | E              | E      | D              | E      | D             | E      | D                | E      | C                   | D      |
|                              |                     | Nilai Tambah Sekunder | 0,0151 | C              | C      | B              | A      | D             | D      | B                | C      | C                   | C      |
|                              |                     | Nilai Tambah Tersier  | 0,0123 | A              | A      | C              | B      | A             | A      | A                | A      | A                   | A      |
|                              | Total Ekonomi       |                       |        | 0,0255         | 0,0290 | 0,0221         | 0,0324 | 0,0348        | 0,0277 | 0,0300           | 0,0287 | 0,0359              | 0,0361 |
| TENAGA KERJA & PRODUKTIVITAS | Ketersediaan T.K.   | Usia Produktif        | 0,0099 | A              | A      | B              | B      | C             | C      | B                | B      | C                   | B      |
|                              |                     | SLTP                  | 0,0097 | A              | C      | A              | C      | A             | A      | C                | B      | C                   | C      |
|                              |                     | Pencari Kerja         | 0,0235 | B              | A      | A              | C      | C             | B      | C                | B      | C                   | C      |
|                              | Biaya T.K.          | UMP/IHK               | 0,0144 | A              | C      | A              | E      | A             | D      | A                | A      | B                   | A      |
|                              |                     | Upah Aktual/IHK       | 0,0163 | B              | D      | B              | B      | D             | B      | B                | C      | B                   | E      |
|                              | Produktivitas       |                       | 0,0525 | D              | E      | C              | B      | D             | D      | B                | B      | C                   | C      |
|                              | Total Tenaga Kerja  |                       |        | 0,0310         | 0,0233 | 0,0384         | 0,0324 | 0,0190        | 0,0253 | 0,0369           | 0,0341 | 0,0258              | 0,0221 |
| INFRASTRUKTUR FISIK          | Ketersediaan        | Jalan                 | 0,0138 | C              | B      | A              | C      | A             | C      | C                | B      | E                   | C      |
|                              |                     | Pelabuhan Laut        | 0,0141 | C              | D      | C              | C      | C             | C      | C                | B      | C                   | A      |
|                              |                     | Pelabuhan Udara       | 0,0058 | B              | D      | B              | B      | D             | B      | B                | B      | B                   | B      |
|                              |                     | Telepon               | 0,0160 | A              | B      | C              | C      | C             | C      | A                | A      | C                   | E      |
|                              |                     | Listrik               | 0,0175 | D              | B      | E              | C      | E             | E      | D                | A      | D                   | D      |
|                              | Kualitas            | Jalan                 | 0,0095 | B              | B      | C              | E      | C             | B      | B                | B      | C                   | B      |
|                              |                     | Pelabuhan Laut        | 0,0089 | C              | D      | C              | C      | D             | D      | B                | B      | C                   | B      |
|                              |                     | Pelabuhan Udara       | 0,0073 | C              | D      | C              | B      | C             | C      | B                | C      | B                   | B      |
|                              |                     | Telepon               | 0,0204 | D              | B      | C              | C      | C             | D      | D                | B      | C                   | E      |
|                              |                     | Listrik               | 0,0139 | D              | B      | D              | C      | C             | E      | D                | B      | D                   | E      |
|                              | Total Infrastruktur |                       |        | 0,0238         | 0,0334 | 0,0242         | 0,0222 | 0,0237        | 0,0182 | 0,0262           | 0,0443 | 0,0192              | 0,0202 |
| TOTAL SCORE                  |                     |                       | 1,0000 | 0,1632         | 0,2155 | 0,1613         | 0,1572 | 0,1611        | 0,1521 | 0,1608           | 0,1774 | 0,1490              | 0,1442 |
| PERINGKAT                    |                     |                       |        | 32             | 8      | 33             | 38     | 34            | 40     | 35               | 31     | 36                  | 41     |

## Lampiran 2. Daerah Penelitian

### Lampiran 2.1 Statistik Daerah Peningkatan Kabupaten dan Kota (Propinsi, Sektor Ekonomi Dominan; PDRB Perkapita)

#### 1. Berdasarkan Propinsi, Kabupaten, dan Kota

| NO             | PROPINSI            | KABUPATEN |         | KOTA   |         | JUMLAH |         |
|----------------|---------------------|-----------|---------|--------|---------|--------|---------|
|                |                     | Jumlah    | % Total | Jumlah | % Total | Jumlah | % Total |
| 1              | SUMATERA UTARA      | 8         | 5,1     | 6      | 13,6    | 14     | 7,0     |
| 2              | SUMATERA BARAT      | 4         | 2,6     | 2      | 4,5     | 6      | 3,0     |
| 3              | R I A U             | 6         | 3,8     | 3      | 6,8     | 9      | 4,5     |
| 4              | J A M B I           | 5         | 3,2     | 0      | 0,0     | 5      | 2,5     |
| 5              | SUMATERA SELATAN    | 5         | 3,2     | 1      | 2,3     | 6      | 3,0     |
| 6              | BANGKA BELITUNG     | 2         | 1,3     | 1      | 2,3     | 3      | 1,5     |
| 7              | BENGKULU            | 1         | 0,6     | 1      | 2,3     | 2      | 1,0     |
| 8              | LAMPUNG             | 5         | 3,2     | 1      | 2,3     | 6      | 3,0     |
| 9              | BANTEN              | 3         | 1,9     | 2      | 4,5     | 5      | 2,5     |
| 10             | DKI. JAKARTA        | 0         | 0,0     | 1      | 2,3     | 1      | 0,5     |
| 11             | JAWA BARAT          | 15        | 9,6     | 5      | 11,4    | 20     | 10,0    |
| 12             | JAWA TENGAH         | 14        | 9,0     | 4      | 9,1     | 18     | 9,0     |
| 13             | D.I. YOGYAKARTA     | 2         | 1,3     | 1      | 2,3     | 3      | 1,5     |
| 14             | JAWA TIMUR          | 16        | 10,3    | 6      | 13,6    | 22     | 11,0    |
| 15             | BALI                | 7         | 4,5     | 1      | 2,3     | 8      | 4,0     |
| 16             | KALIMANTAN BARAT    | 5         | 3,2     | 0      | 0,0     | 5      | 2,5     |
| 17             | KALIMANTAN TENGAH   | 3         | 1,9     | 0      | 0,0     | 3      | 1,5     |
| 18             | KALIMANTAN SELATAN  | 6         | 3,8     | 0      | 0,0     | 6      | 3,0     |
| 19             | KALIMANTAN TIMUR    | 6         | 3,8     | 2      | 4,5     | 8      | 4,0     |
| 20             | SULAWESI UTARA      | 2         | 1,3     | 2      | 4,5     | 4      | 2,0     |
| 21             | GORONTALO           | 1         | 0,6     | 1      | 2,3     | 2      | 1,0     |
| 22             | SULAWESI TENGAH     | 5         | 3,2     | 0      | 0,0     | 5      | 2,5     |
| 23             | SULAWESI TENGGARA   | 2         | 1,3     | 1      | 2,3     | 3      | 1,5     |
| 24             | SULAWESI SELATAN    | 16        | 10,3    | 1      | 2,3     | 17     | 8,5     |
| 25             | NUSA TENGGARA BARAT | 4         | 2,6     | 1      | 2,3     | 5      | 2,5     |
| 26             | NUSA TENGGARA TIMUR | 8         | 5,1     | 1      | 2,3     | 9      | 4,5     |
| 27             | IRIAN JAYA BARAT    | 3         | 1,9     | 0      | 0,0     | 3      | 1,5     |
| 28             | PAPUA               | 2         | 1,3     | 0      | 0,0     | 2      | 1,0     |
| JUMLAH (Total) |                     | 156       | 100     | 44     | 100     | 200    | 100     |

#### 2. Propinsi yang Tidak Terwakili

|   |                      |
|---|----------------------|
| 1 | NAGRO ACEH DARUSALAM |
| 2 | MALUKU               |
| 3 | MALUKU UTARA         |

#### 3. Berdasarkan Basis Sektor Ekonomi

| NO                   | PDRB PERKAPITA                                                           | KABUPATEN |      | KOTA   |      | JUMLAH |       |
|----------------------|--------------------------------------------------------------------------|-----------|------|--------|------|--------|-------|
|                      |                                                                          | Jumlah    | %    | Jumlah | %    | Jumlah | %     |
| 1                    | PERDAGANGAN DAN JASA                                                     | 54        | 27,0 | 32     | 16,0 | 86     | 43,0  |
| 2                    | MANUFAKTUR                                                               | 19        | 9,5  | 17     | 8,5  | 36     | 18,0  |
| 3                    | PERTAMBANGAN                                                             | 16        | 8,0  | 1      | 0,5  | 17     | 8,5   |
| 4                    | PERKEBUNAN DAN KEHUTANAN                                                 | 26        | 13,0 | 0      | 0,0  | 26     | 13,0  |
| 5                    | PERTANIAN NON PANGAN<br>(Perkebunan, Kehutanan, Peternakan, & Perikanan) | 56        | 9,5  | 4      | 2,0  | 36     | 18,0  |
| Jumlah Keseluruhan : |                                                                          | 156       | 78,0 | 44     | 22,0 | 200    | 100,0 |

Nilai % = prosentase terhadap 134 daerah

#### 3. Berdasarkan PDRB Perkapita

| NO                   | PDRB PERKAPITA                      | KABUPATEN |       | KOTA   |       | JUMLAH |       |
|----------------------|-------------------------------------|-----------|-------|--------|-------|--------|-------|
|                      |                                     | Jumlah    | %     | Jumlah | %     | Jumlah | %     |
| 1                    | PDRB Perkapita < 2.5 Juta           | 54        | 40,3  | 0      | 0,0   | 54     | 40,3  |
| 2                    | 2.5 Juta <= PDRB Perkapita < 5 Juta | 60        | 44,8  | 12     | 9,0   | 72     | 53,7  |
| 3                    | 5 Juta <= PDRB Perkapita < 7.5 Juta | 26        | 19,4  | 18     | 13,4  | 44     | 32,8  |
| 4                    | PDRB Perkapita >= 7.5 Juta          | 16        | 11,9  | 14     | 10,4  | 30     | 22,4  |
| Jumlah Keseluruhan : |                                     | 156       | 78,00 | 44     | 32,84 | 200    | 149,3 |

Lampiran 2.2 Daftar 156 Kabupaten Pemeringkatan

| No. | PROPINSI         | No. | KABUPATEN                        |
|-----|------------------|-----|----------------------------------|
| 1   | SUMATERA UTARA   | 1   | KAB. ASAHAN                      |
|     |                  | 2   | KAB. DAIRI                       |
|     |                  | 3   | KAB. DELI SERDANG                |
|     |                  | 4   | KAB. LANGKAT                     |
|     |                  | 5   | KAB. SIMALUNGUN                  |
|     |                  | 6   | <b>KAB. TANAH KARO</b>           |
|     |                  | 7   | <b>KAB. LABUHAN BATU</b>         |
|     |                  | 8   | <b>KAB. TAPANULI UTARA</b>       |
| 2   | SUMATERA BARAT   | 1   | KAB. PESISIR SELATAN             |
|     |                  | 2   | KAB. SAWAHLUNTO SIJUNJUNG        |
|     |                  | 3   | <b>KAB. PASAMAN</b>              |
|     |                  | 4   | <b>KAB. SOLOK</b>                |
| 3   | RIAU             | 1   | KAB. BENGKALIS                   |
|     |                  | 2   | KAB. INDRAGIRI HILIR             |
|     |                  | 3   | KAB. KAMPAR                      |
|     |                  | 4   | KAB. KUANTAN SINGINGI            |
|     |                  | 5   | <b>KAB. PELALAWAN</b>            |
|     |                  | 6   | <b>KAB. ROKAN HULU</b>           |
| 4   | JAMBI            | 1   | KAB. BATANG HARI                 |
|     |                  | 2   | KAB. BUNGO                       |
|     |                  | 3   | KAB. KERINCI                     |
|     |                  | 4   | <b>KAB. TANJUNG JABUNG TIMUR</b> |
|     |                  | 5   | <b>KAB. TEBO</b>                 |
| 5   | SUMATERA SELATAN | 1   | KAB. MUARA ENIM                  |
|     |                  | 2   | KAB. MUSI BANYUASIN              |
|     |                  | 3   | KAB. MUSI RAWAS                  |
|     |                  | 4   | KAB. OGAN KOMIRING ILIR          |
|     |                  | 5   | <b>KAB. LAHAT</b>                |
| 6   | BANGKA BELITUNG  | 1   | KAB. BANGKA                      |
|     |                  | 2   | <b>KAB. BELITUNG</b>             |
| 7   | BENGKULU         | 1   | KAB. BENGKULU SELATAN            |
| 8   | LAMPUNG          | 2   | KAB. LAMPUNG BARAT               |
|     |                  | 3   | KAB. LAMPUNG SELATAN             |
|     |                  | 4   | KAB. LAMPUNG TIMUR               |
|     |                  | 5   | <b>KAB. LAMPUNG UTARA</b>        |
|     |                  | 6   | <b>KAB. WAYKANAN</b>             |
| 9   | BANTEN           | 1   | KAB. LEBAK                       |
|     |                  | 2   | KAB. SERANG                      |
|     |                  | 3   | KAB. TANGERANG                   |
| 10  | JAWA BARAT       | 1   | KAB. BEKASI                      |
|     |                  | 2   | KAB. BOGOR                       |
|     |                  | 3   | KAB. CIAMIS                      |
|     |                  | 4   | KAB. CIREBON                     |
|     |                  | 5   | KAB. GARUT                       |
|     |                  | 6   | KAB. INDRAMAYU                   |
|     |                  | 7   | KAB. KARAWANG                    |
|     |                  | 8   | KAB. KUNINGAN                    |
|     |                  | 9   | KAB. SUKABUMI                    |
|     |                  | 10  | KAB. SUMEDANG                    |
|     |                  | 11  | KAB. TASIKMALAYA                 |
|     |                  | 12  | <b>KAB. BANDUNG</b>              |
|     |                  | 13  | <b>KAB. CIANJUR</b>              |
|     |                  | 14  | <b>KAB. PURWAKARTA</b>           |

| No. | PROPINSI               | No. | KABUPATEN                |
|-----|------------------------|-----|--------------------------|
| 11  | JAWA TENGAH            | 15  | <b>KAB. SUBANG</b>       |
|     |                        | 1   | KAB. KENDAL              |
|     |                        | 2   | KAB. MAGELANG            |
|     |                        | 3   | KAB. PEKALONGAN          |
|     |                        | 4   | KAB. PEMALANG            |
|     |                        | 5   | KAB. SUKOHARJO           |
|     |                        | 6   | KAB. TEGAL               |
|     |                        | 7   | <b>KAB. BANYUMAS</b>     |
|     |                        | 8   | <b>KAB. BOYOLALI</b>     |
|     |                        | 9   | <b>KAB. CILACAP</b>      |
|     |                        | 10  | <b>KAB. JEPARA</b>       |
|     |                        | 11  | <b>KAB. KARANGANYAR</b>  |
|     |                        | 12  | <b>KAB. KLATEN</b>       |
|     |                        | 13  | <b>KAB. KUDUS</b>        |
|     |                        | 14  | <b>KAB. KEBUMEN</b>      |
| 12  | <b>D.I. YOGYAKARTA</b> | 1   | <b>KAB. BANTUL</b>       |
|     |                        | 2   | <b>KAB. GUNUNG KIDUL</b> |
| 13  | JAWA TIMUR             | 1   | KAB. BANGKALAN           |
|     |                        | 2   | KAB. BANYUWANGI          |
|     |                        | 3   | KAB. BLITAR              |
|     |                        | 4   | KAB. KEDIRI              |
|     |                        | 5   | KAB. MAGETAN             |
|     |                        | 6   | KAB. MOJOKERTO           |
|     |                        | 7   | KAB. PAMEKASAN           |
|     |                        | 8   | KAB. PASURUHAN           |
|     |                        | 9   | KAB. SIDOARJO            |
|     |                        | 10  | <b>KAB. BONDOWOSO</b>    |
|     |                        | 11  | <b>KAB. GRESIK</b>       |
|     |                        | 12  | <b>KAB. JEMBER</b>       |
|     |                        | 13  | <b>KAB. JOMBANG</b>      |
|     |                        | 14  | <b>KAB. LAMONGAN</b>     |
|     |                        | 15  | <b>KAB. PONOROGO</b>     |
|     |                        | 16  | <b>KAB. TULUNGAGUNG</b>  |
| 14  | BALI                   | 1   | KAB. BADUNG              |
|     |                        | 2   | KAB. BANGLI              |
|     |                        | 3   | KAB. BULELENG            |
|     |                        | 4   | KAB. GIANYAR             |
|     |                        | 5   | KAB. JEMBRANA            |
|     |                        | 6   | KAB. TABANAN             |
|     |                        | 7   | <b>KAB. KARANGASEM</b>   |
| 15  | KALIMANTAN BARAT       | 1   | KAB. KAPUAS HULU         |
|     |                        | 2   | KAB. KETAPANG            |
|     |                        | 3   | KAB. PONTIANAK           |
|     |                        | 4   | KAB. SAMBAS              |
|     |                        | 5   | KAB. SANGGAU             |
| 16  | KALIMANTAN TENGAH      | 1   | KAB. BARITO SELATAN      |
|     |                        | 2   | KAB. BARITO UTARA        |
|     |                        | 3   | KAB. KAPUAS              |
| 17  | KALIMANTAN SELATAN     | 1   | KAB. HULU SUNGAI SELATAN |
|     |                        | 2   | KAB. HULU SUNGAI TENGAH  |
|     |                        | 3   | KAB. HULU SUNGAI UTARA   |
|     |                        | 4   | KAB. TABALONG            |
|     |                        | 5   | KAB. TANAH LAUT          |

| No. | PROPINSI            | No. | KABUPATEN                 |
|-----|---------------------|-----|---------------------------|
| 18  | KALIMANTAN TIMUR    | 6   | KAB. TAPIN                |
|     |                     | 1   | KAB. BERAU                |
|     |                     | 2   | KAB. KUTAI KERTANEGARA    |
|     |                     | 3   | KAB. PASIR                |
|     |                     | 4   | <b>KAB. BULUNGAN</b>      |
|     |                     | 5   | <b>KAB. KUTAI TIMUR</b>   |
|     |                     | 6   | <b>KAB. NUNUKAN</b>       |
| 19  | SULAWESI UTARA      | 1   | KAB. MINAHASA             |
|     |                     | 2   | KAB. SANGIHE              |
| 20  | GORONTALO           | 1   | KAB. GORONTALO            |
| 21  | SULAWESI TENGAH     | 1   | KAB. BANGGAI              |
|     |                     | 2   | KAB. TOLITOLI             |
|     |                     | 3   | KAB. DONGGALA             |
|     |                     | 4   | KAB. MOROWALI             |
|     |                     | 5   | KAB. POSO                 |
| 22  | SULAWESI TENGGARA   | 1   | KAB. BUTON                |
|     |                     | 2   | KAB. KOLAKA               |
| 23  | SULAWESI SELATAN    | 1   | KAB. LUWU                 |
|     |                     | 2   | KAB. MAJENE               |
|     |                     | 3   | KAB. PANGKAJENE KEPULAUAN |
|     |                     | 4   | KAB. PINRANG              |
|     |                     | 5   | KAB. TANA TORAJA          |
|     |                     | 6   | KAB. BANTAENG             |
|     |                     | 7   | <b>KAB. BARRU</b>         |
|     |                     | 8   | <b>KAB. BONE</b>          |
|     |                     | 9   | <b>KAB. ENREKANG</b>      |
|     |                     | 10  | <b>KAB. GOWA</b>          |
|     |                     | 11  | <b>KAB. JENEPONTO</b>     |
|     |                     | 12  | <b>KAB. LUWU UTARA</b>    |
|     |                     | 13  | <b>KAB. MAROS</b>         |
|     |                     | 14  | <b>KAB. SELAYAR</b>       |
|     |                     | 15  | <b>KAB. SINJAI</b>        |
|     |                     | 16  | <b>KAB. TAKALAR</b>       |
| 24  | NUSA TENGGARA BARAT | 1   | KAB. BIMA                 |
|     |                     | 2   | KAB. LOMBOK BARAT         |
|     |                     | 3   | <b>KAB. DOMPU</b>         |
|     |                     | 4   | <b>KAB. LOMBOK TIMUR</b>  |
| 25  | NUSA TENGGARA TIMUR | 1   | KAB. ENDE                 |
|     |                     | 2   | KAB. FLORES TIMUR         |
|     |                     | 3   | KAB. TIMOR TENGAH SELATAN |
|     |                     | 4   | KAB. TIMOR TENGAH UTARA   |
|     |                     | 5   | <b>KAB. BELU</b>          |
|     |                     | 6   | <b>KAB. MANGGARAI</b>     |
|     |                     | 7   | <b>KAB. NGADA</b>         |
|     |                     | 8   | <b>KAB. SUMBA BARAT</b>   |
| 26  | IRIAN JAYA BARAT    | 1   | KAB. FAKFAK               |
|     |                     | 2   | KAB. MANOKWARI            |
| 27  | <b>PAPUA</b>        | 1   | <b>KAB. SORONG</b>        |
|     |                     | 2   | <b>KAB. JAYAWIJAYA</b>    |
|     |                     | 3   | <b>KAB. MIMIKA</b>        |

**Keterangan :**

 Daerah yang baru ikut rating tahun 2003

Lampiran 2.3 Daftar 44 Kota Pemeringkatan

| No. | PROPINSI              | No. | KOTA                       |
|-----|-----------------------|-----|----------------------------|
| 1   | SUMATERA UTARA        | 1   | KOTA BINJAI                |
|     |                       | 2   | KOTA MEDAN                 |
|     |                       | 3   | KOTA PEMATANG SIANTAR      |
|     |                       | 4   | KOTA SIBOLGA               |
|     |                       | 5   | KOTA TANJUNG BALAI         |
|     |                       | 6   | KOTA TEBING TINGGI         |
|     |                       | 7   | KOTA PADANG                |
|     |                       | 8   | KOTA SAWAHLUNTO            |
| 2   | RIAU                  | 9   | KOTA BATAM                 |
|     |                       | 10  | KOTA PEKANBARU             |
|     |                       | 11  | <b>KOTA DUMAI</b>          |
| 3   | SUMATERA SELATAN      | 12  | KOTA PALEMBANG             |
| 4   | BANGKA BELITUNG       | 13  | KOTA PANGKAL PINANG        |
| 5   | BENGKULU              | 14  | KOTA BENGKULU              |
| 6   | LAMPUNG               | 15  | KOTA BANDAR LAMPUNG        |
| 7   | BANTEN                | 16  | KOTA TANGERANG             |
|     |                       | 17  | <b>KOTA CILEGON</b>        |
| 8   | <b>D.K.I. JAKARTA</b> | 18  | <b>KOTA D.K.I. JAKARTA</b> |
| 9   | JAWA BARAT            | 19  | KOTA BEKASI                |
|     |                       | 20  | KOTA BOGOR                 |
|     |                       | 21  | KOTA CIREBON               |
|     |                       | 22  | KOTA SUKABUMI              |
|     |                       | 23  | <b>KOTA BANDUNG</b>        |
| 10  | JAWA TENGAH           | 24  | KOTA PEKALONGAN            |
|     |                       | 25  | KOTA SEMARANG              |
|     |                       | 26  | KOTA TEGAL                 |
|     |                       | 27  | <b>KOTA SURAKARTA</b>      |
| 11  | D.I. YOGYAKARTA       | 28  | KOTA YOGYAKARTA            |
| 12  | JAWA TIMUR            | 29  | KOTA KEDIRI                |
|     |                       | 30  | KOTA MALANG                |
|     |                       | 31  | KOTA MOJOKERTO             |
|     |                       | 32  | KOTA PROBOLINGGO           |
|     |                       | 33  | KOTA SURABAYA              |
|     |                       | 34  | <b>KOTA MADIUN</b>         |
| 13  | BALI                  | 35  | KOTA DENPASAR              |
| 14  | KALIMANTAN TIMUR      | 36  | KOTA BALIKPAPAN            |
|     |                       | 37  | KOTA SAMARINDA             |
| 15  | SULAWESI UTARA        | 38  | KOTA BITUNG                |
|     |                       | 39  | KOTA MANADO                |
| 16  | GORONTALO             | 40  | KOTA GORONTALO             |
| 17  | SULAWESI TENGGARA     | 41  | <b>KOTA KENDARI</b>        |
| 18  | SULAWESI SELATAN      | 42  | KOTA PAREPARE              |
| 19  | NUSA TENGGARA BARAT   | 43  | KOTA MARATAM               |
| 20  | NUSA TENGGARA TIMUR   | 44  | KOTA KUPANG                |

**Keterangan :**

Daerah yang baru ikut rating tahun 2003



### Lampiran 3. Data Penelitian

#### Lampiran 3.1 Daftar Data, Jenis Data, dan Sumber Data Pemeringkat

| NO.                                       | FAKTOR - VARIABEL - INDIKATOR                                                                | JENIS DATA     | SUMBER DATA                                                        |
|-------------------------------------------|----------------------------------------------------------------------------------------------|----------------|--------------------------------------------------------------------|
| <b>A. FAKTOR KELEMBAGAAN</b>              |                                                                                              |                |                                                                    |
| <b>1. Variabel Kepastian Hukum</b>        |                                                                                              |                |                                                                    |
| 1                                         | Konsistensi Peraturan                                                                        | Data Primer    | Persepsi Dunia Usaha dan                                           |
| 2                                         | Penegakan Hukum                                                                              | Data Primer    | Persepsi Dunia Usaha dan                                           |
| 3                                         | Pungli di luar Birokrasi                                                                     | Data Primer    | Persepsi Dunia Usaha dan                                           |
| 4                                         | Hubungan Eksekutif - Legislatif                                                              | Data Primer    | Persepsi Dunia Usaha dan                                           |
| <b>2. Variabel Aparatur dan Pelayanan</b> |                                                                                              |                |                                                                    |
| 5                                         | Birokrasi Pelayanan                                                                          | Data Primer    | Persepsi Dunia Usaha dan                                           |
| 6                                         | Penyalahgunaan Wewenang                                                                      | Data Primer    | Persepsi Dunia Usaha dan                                           |
| <b>3. Variabel Keuangan Daerah</b>        |                                                                                              |                |                                                                    |
| 7                                         | Rasio Penerimaan Retribusi terhadap Pajak                                                    | Data Sekunder  | APBD Daerah Kabupaten / Kota Tahun 2002                            |
| 8                                         | Rasio Anggaran Pembangunan terhadap APBD                                                     | Data Sekunder  | APBD Daerah Kabupaten / Kota Tahun 2002                            |
| <b>4. Variabel Perda</b>                  |                                                                                              |                |                                                                    |
| 9                                         | Peraturan Produk Hukum Daerah (Pajak dan Retribusi)                                          | Analisis Perda | Perda, SK Kepala Daerah Kabupaten Kota                             |
| <b>B. FAKTOR KONDISI SOSPOL</b>           |                                                                                              |                |                                                                    |
| <b>1. Variabel Keamanan</b>               |                                                                                              |                |                                                                    |
| 10                                        | Gangguan Keamanan terhadap Dunia Usaha                                                       | Data Primer    | Persepsi Dunia Usaha dan                                           |
| 11                                        | Gangguan Keamanan terhadap Masyarakat                                                        | Data Primer    | Persepsi Dunia Usaha dan                                           |
| 12                                        | Kecepatan Aparat Menanggulangi Gangguan Keamanan                                             | Data Primer    | Persepsi Dunia Usaha dan                                           |
| <b>2. Variabel Sospol</b>                 |                                                                                              |                |                                                                    |
| 13                                        | Partisipasi Masyarakat                                                                       | Data Primer    | Persepsi Dunia Usaha dan                                           |
| 14                                        | Potensi Konflik di masyarakat                                                                | Data Primer    | Persepsi Dunia Usaha dan                                           |
| 15                                        | Stabilitas Politik                                                                           | Data Primer    | Persepsi Dunia Usaha dan                                           |
| 16                                        | Intensitas Unjuk Rasa                                                                        | Data Primer    | Persepsi Dunia Usaha dan                                           |
| <b>3. Variabel Budaya Masyarakat</b>      |                                                                                              |                |                                                                    |
| 17                                        | Keterbukaan Masyarakat terhadap Dunia Usaha                                                  | Data Primer    | Persepsi Dunia Usaha dan                                           |
| 18                                        | Non Diskriminasi (Perlakuan yang sama terhadap semua orang tanpa melihat perbedaan yang ada) | Data Primer    | Persepsi Dunia Usaha dan                                           |
| 19                                        | Adat Istiadat Masyarakat Daerah                                                              | Data Primer    | Persepsi Dunia Usaha dan                                           |
| 20                                        | Etos Kerja Masyarakat Daerah                                                                 | Data Primer    | Persepsi Dunia Usaha dan                                           |
| <b>C. FAKTOR EKONOMI DAERAH</b>           |                                                                                              |                |                                                                    |
| <b>1. Variabel Potensi Ekonomi</b>        |                                                                                              |                |                                                                    |
| 21                                        | PDRB Perkapita                                                                               | Data Sekunder  | PDRB Perkapita Kabupaten / Kota Th. 2001                           |
| 22                                        | Laju Pertumbuhan PDRB                                                                        | Data Sekunder  | PDRB Kabupaten / Kota atas Dasar Harga Konstan Tahun 1996 s/d 2001 |
| 23                                        | IPM (Indeks Pembangunan Manusia)                                                             | Data Sekunder  | IPM Kabupaten / Kota Tahun 2002                                    |
| <b>2. Variabel Struktur Ekonomi</b>       |                                                                                              |                |                                                                    |
| 24                                        | Nilai Tambah Sektor Primer                                                                   | Data Sekunder  | PDRB Kabupaten / Kota Atas Dasar Harga Berlaku Tahun 2001          |
| 25                                        | Nilai Tambah Sektor Sekunder                                                                 | Data Sekunder  | PDRB Kabupaten / Kota Atas Dasar Harga Berlaku Tahun 2001          |
| 26                                        | Nilai Tambah Sektor Tersier                                                                  | Data Sekunder  | PDRB Kabupaten / Kota Atas Dasar Harga Berlaku Tahun 2001          |

| NO.                                                        | FAKTOR - VARIABEL - INDIKATOR                                                                | JENIS DATA             | SUMBER DATA                                                                                                                      |
|------------------------------------------------------------|----------------------------------------------------------------------------------------------|------------------------|----------------------------------------------------------------------------------------------------------------------------------|
| <b>D. FAKTOR KETENAGAKERJAAN</b>                           |                                                                                              |                        |                                                                                                                                  |
| <b>1. Variabel Ketersediaan Tenaga Kerja</b>               |                                                                                              |                        |                                                                                                                                  |
| 27                                                         | Rasio Jumlah Penduduk Usia Produktif terhadap Jumlah Penduduk                                | Data Sekunder          | BPS Pusat : Susenas Kor Tahun 2002                                                                                               |
| 28                                                         | Rasio Jumlah Tenaga Kerja Berpengalaman dengan pendidikan SLTP terhadap Jumlah Tenaga Kerja  | Data Sekunder          | BPS Pusat : Susenas Kor Tahun 2002                                                                                               |
| 29                                                         | Rasio Penduduk Pencari Kerja Terhadap Jumlah Angkatan Kerja                                  | Data Sekunder          | BPS Pusat : Susenas Kor Tahun 2002                                                                                               |
| <b>2. Variabel Biaya Tenaga Kerja</b>                      |                                                                                              |                        |                                                                                                                                  |
| 30                                                         | UMP/UMK                                                                                      | Data Sekunder          | APINDO : Daftar UMP dan UMK Daerah Di Indonesia Tahun 2003                                                                       |
| 31                                                         | Rasio Upah Yang Diterima Pekerja terhadap IHK                                                | Data Sekunder          | BPS Pusat : Susenasker Kor 2002                                                                                                  |
| <b>3. Variabel Produktivitas dan Kualitas Tenaga Kerja</b> |                                                                                              |                        |                                                                                                                                  |
| 32                                                         | Produktivitas (Rasio Nilai Tambah Sektor Manufaktur terhadap Jumlah Tenaga Kerja Manufaktur) | Data Sekunder          | BPS Pusat dan Daerah : PDRB Atas Harga Konstan Th. 2001, Susenasker Kor Th. 2001                                                 |
| <b>E. FAKTOR INFRASTRUKTUR</b>                             |                                                                                              |                        |                                                                                                                                  |
| <b>1. Variabel Ketersediaan Infrastruktur</b>              |                                                                                              |                        |                                                                                                                                  |
| 33                                                         | Ketersediaan Jalan                                                                           | Data Primer & Sekunder | Data Primer : Persepsi Pelaku Usaha ;<br>Data Sekunder : BPS Daerah / BPS Pusat : Daerah Kabupaten/Kota dan Propinsi Dalam Angka |
| 34                                                         | Ketersediaan Pelabuhan Laut                                                                  | Data Primer & Sekunder | Data Primer : Persepsi Pelaku Usaha ;<br>Data Sekunder : BPS Daerah / BPS Pusat : Daerah Kab./Kota dan Propinsi Dalam Angka      |
| 35                                                         | Ketersediaan Pelabuhan Udara                                                                 | Data Primer & Sekunder | Data Primer : Persepsi Pelaku Usaha ;<br>Data Sekunder : BPS Daerah / BPS Pusat : Daerah Kab./Kota dan Propinsi Dalam Angka      |
| 36                                                         | Ketersediaan Saluran (sambungan) Telpon                                                      | Data Primer & Sekunder | Data Primer : Persepsi Pelaku Usaha ;<br>Data Sekunder : BPS Daerah / BPS Pusat : Daerah Kab./Kota dan Propinsi Dalam Angka      |
| 37                                                         | Ketersediaan Saluran (sambungan) Listrik                                                     | Data Primer & Sekunder | Data Primer : Persepsi Pelaku Usaha ;<br>Data Sekunder : BPS Daerah / BPS Pusat : Daerah Kab./Kota dan Propinsi Dalam Angka      |
| <b>2. Variabel Kualitas Infrastruktur</b>                  |                                                                                              |                        |                                                                                                                                  |
| 38                                                         | Kualitas Jalan                                                                               | Data Primer & Sekunder | Data Primer : Persepsi Pelaku Usaha ;<br>Data Sekunder : BPS Daerah / BPS Pusat : Daerah Kab./Kota dan Propinsi Dalam Angka      |
| 39                                                         | Akses & Tipe Pelabuhan Laut                                                                  | Data Primer & Sekunder | Data Primer : Persepsi Pelaku Usaha ;<br>Data Sekunder : BPS Daerah / BPS Pusat : Daerah Kab./Kota dan Propinsi Dalam Angka      |
| 40                                                         | Akses & Tipe Pelabuhan Udara                                                                 | Data Primer & Sekunder | Data Primer : Persepsi Pelaku Usaha ;<br>Data Sekunder : BPS Daerah / BPS Pusat : Daerah Kab./Kota dan Propinsi Dalam Angka      |
| 41                                                         | Kualitas Sambungan Telpon                                                                    | Data Primer & Sekunder | Data Primer : Persepsi Pelaku Usaha ;<br>Data Sekunder : BPS Daerah / BPS Pusat : Daerah Kab./Kota dan Propinsi Dalam Angka      |
| 42                                                         | Kualitas Suplai Listrik                                                                      | Data Primer & Sekunder | Data Primer : Persepsi Pelaku Usaha ;<br>Data Sekunder : BPS Daerah / BPS Pusat : Daerah Kab./Kota dan Propinsi Dalam Angka      |

Lampiran 4. Faktor, Variabel, dan Indikator, Intensitas Pemeringkatan

Lampiran 4.1 Daftar Faktor, Variabel, dan Indikator Pemeringkatan

| NO.                                       | FAKTOR -<br>VARIABEL - INDIKATOR                                               | KETERANGAN                                                                                                                                                                                                                                                                                                                                                                                                                                                                                                                   | UKURAN DAN DATA<br>YANG DIGUNAKAN                                    |
|-------------------------------------------|--------------------------------------------------------------------------------|------------------------------------------------------------------------------------------------------------------------------------------------------------------------------------------------------------------------------------------------------------------------------------------------------------------------------------------------------------------------------------------------------------------------------------------------------------------------------------------------------------------------------|----------------------------------------------------------------------|
| <b>A. FAKTOR KELEMBAGAAN</b>              |                                                                                |                                                                                                                                                                                                                                                                                                                                                                                                                                                                                                                              |                                                                      |
| <b>1. Variabel Kepastian Hukum</b>        |                                                                                |                                                                                                                                                                                                                                                                                                                                                                                                                                                                                                                              |                                                                      |
| 1                                         | Konsistensi Peraturan yang Mengatur Kegiatan Usaha                             | Mengukur kepastian, kejelasan, dan konsistensi pemberlakuan peraturan daerah dan kebijakan lainnya yang mengatur kehidupan berusaha.                                                                                                                                                                                                                                                                                                                                                                                         | Persepsi Dunia Usaha                                                 |
| 2                                         | Penegakan Hukum                                                                | Mengukur kepastian hukum seperti perlindungan atas pelaksanaan kontrak kerja dan hak kepemilikan, konsistensi keputusan peradilan, terutama yang berkaitan dengan dunia usaha.                                                                                                                                                                                                                                                                                                                                               | Persepsi Dunia Usaha                                                 |
| 3                                         | Pungli di luar Birokrasi terhadap Kegiatan Usaha                               | Melihat penanganan yang dilakukan oleh pemerintah daerah terhadap berbagai praktik-praktik pungutan ilegal yang dilakukan oleh orang, kelompok orang/ masyarakat di luar birokrasi, yang mengganggu kegiatan usaha.                                                                                                                                                                                                                                                                                                          | Persepsi Dunia Usaha                                                 |
| 4                                         | Hubungan Eksekutif - Legislatif                                                | Melihat hambatan yang ditimbulkan oleh kondisi hubungan antara DPRD dan Pemda                                                                                                                                                                                                                                                                                                                                                                                                                                                | Persepsi Dunia Usaha                                                 |
| <b>2. Variabel Aparatur dan Pelayanan</b> |                                                                                |                                                                                                                                                                                                                                                                                                                                                                                                                                                                                                                              |                                                                      |
| 5                                         | Birokrasi Pelayanan terhadap Dunia Usaha                                       | Mengukur kemudahan pelayanan birokrasi dan profesionalisme aparat pemda dalam melakukan pelayanan terhadap dunia usaha.                                                                                                                                                                                                                                                                                                                                                                                                      | Persepsi Dunia Usaha                                                 |
| 6                                         | Penyalahgunaan Wewenang                                                        | Mengukur distorsi perilaku aparat pemda dalam melakukan pelayanan terhadap dunia usaha.                                                                                                                                                                                                                                                                                                                                                                                                                                      | Persepsi Dunia Usaha                                                 |
| <b>3. Variabel Keuangan Daerah</b>        |                                                                                |                                                                                                                                                                                                                                                                                                                                                                                                                                                                                                                              |                                                                      |
| 7                                         | Struktur Pungutan oleh Pemerintah Daerah terhadap Dunia Usaha                  | Untuk melihat struktur berbagai pungutan yang berlaku di daerah, khususnya pajak dan retribusi daerah.                                                                                                                                                                                                                                                                                                                                                                                                                       | Rasio Penerimaan Retribusi terhadap Pajak dalam APBD Kabupaten/Kota  |
| 8                                         | Komitmen Pemerintah Daerah dalam Penyediaan Sarana Pendukung Kegiatan Usaha    | Mengukur komitmen pemerintah daerah dalam melakukan pembangunan infrastruktur fisik yang diperlukan untuk mendukung kegiatan usaha, yang tercermin dari pengalokasian dana untuk anggaran pembangunan.                                                                                                                                                                                                                                                                                                                       | Rasio Anggaran Pembangunan terhadap APBD Kabupaten /Kota             |
| <b>4. Variabel Perda</b>                  |                                                                                |                                                                                                                                                                                                                                                                                                                                                                                                                                                                                                                              |                                                                      |
| 9                                         | Peraturan Produk Hukum Daerah (Pajak dan Retribusi)                            | Mengukur kualitas kebijakan / produk hukum yang dibuat oleh pemerintah daerah (Perda, SK Bupati/ Wali Kota dan Sebagainya) khususnya yang berkaitan dengan dunia usaha. Beberapa aspek yang dinilai dari peraturan / kebijakan daerah tersebut adalah aspek yuridis, filosofi, substansi, maupun prinsip dan dampak yang mungkin ditimbulkan dari pemberlakuan produk hukum tersebut. Beberapa hal yang dilihat adalah peraturan yang berkaitan dengan pelayanan, pungutan, penetapan harga, ketenagakerjaan dan sebagainya. | Analisis Tingkat Keber-<br>masalahan Perda Daerah<br>Kabupaten/ Kota |
| <b>B. FAKTOR KONDISI SOSPOL</b>           |                                                                                |                                                                                                                                                                                                                                                                                                                                                                                                                                                                                                                              |                                                                      |
| <b>1. Variabel Keamanan</b>               |                                                                                |                                                                                                                                                                                                                                                                                                                                                                                                                                                                                                                              |                                                                      |
| 10                                        | Gangguan Keamanan terhadap Aktivitas Dunia Usaha                               | Mengukur hambatan kegiatan usaha yang ditimbulkan oleh gangguan keamanan terhadap aktivitas usaha.                                                                                                                                                                                                                                                                                                                                                                                                                           | Persepsi Dunia Usaha                                                 |
| 11                                        | Gangguan Keamanan terhadap Masyarakat Lingkungan Sekitar Tempat Kegiatan Usaha | Mengukur hambatan keamanan dan rasa aman masyarakat di lingkungan kegiatan usaha.                                                                                                                                                                                                                                                                                                                                                                                                                                            | Persepsi Dunia Usaha                                                 |
| 12                                        | Kecepatan Aparat Menanggulangi Gangguan Keamanan                               | Mengukur kualitas aparat keamanan dalam menangani gangguan keamanan / ketertiban umum, serta jaminan dan perlindungan keamanan yang dapat diberikan oleh aparat keamanan di daerah.                                                                                                                                                                                                                                                                                                                                          | Persepsi Dunia Usaha                                                 |
| <b>2. Variabel Sospol</b>                 |                                                                                |                                                                                                                                                                                                                                                                                                                                                                                                                                                                                                                              |                                                                      |
| 13                                        | Partisipasi Masyarakat / Dunia Usaha dalam Perumusan                           | Mengukur keterbukaan birokrasi terhadap partisipasi masyarakat / dunia usaha dalam                                                                                                                                                                                                                                                                                                                                                                                                                                           | Persepsi Dunia Usaha                                                 |

| NO.                                          | FAKTOR -<br>VARIABEL - INDIKATOR                                   | KETERANGAN                                                                                                                                                                                                                                  | UKURAN DAN DATA<br>YANG DIGUNAKAN                                                                 |
|----------------------------------------------|--------------------------------------------------------------------|---------------------------------------------------------------------------------------------------------------------------------------------------------------------------------------------------------------------------------------------|---------------------------------------------------------------------------------------------------|
|                                              | Kebijakan Pemerintah Daerah                                        | perumusan kebijakan yang menyangkut kepentingannya (dunia usaha). Mengukur keterbukaan / peluang masyarakat untuk ikut mengawasi pelaksanaan kebijakan.                                                                                     |                                                                                                   |
| 14                                           | Potensi Konflik di masyarakat                                      | Mengukur potensi hambatan dalam kegiatan usaha yang ditimbulkan oleh konflik sosial di lingkungan usaha.                                                                                                                                    | Persepsi Dunia Usaha                                                                              |
| 15                                           | Stabilitas Politik                                                 | Mengukur hambatan dalam kegiatan usaha yang ditimbulkan oleh konflik politik yang ada di daerah.                                                                                                                                            | Persepsi Dunia Usaha                                                                              |
| 16                                           | Intensitas Unjuk Rasa                                              | Mengukur intensitas kegiatan unjuk rasa yang dapat menghambat / mengganggu kelancaran kegiatan usaha.                                                                                                                                       | Persepsi Dunia Usaha                                                                              |
| <b>3. Variabel Budaya Masyarakat</b>         |                                                                    |                                                                                                                                                                                                                                             |                                                                                                   |
| 17                                           | Keterbukaan Masyarakat terhadap Dunia Usaha                        | Mengukur daya dukung masyarakat terhadap kegiatan usaha dilihat dari penerimaan masyarakat terhadap keberadaan kegiatan usaha, masuknya investasi dari luar daerah dan para pendatang yang melakukan kegiatan usaha / bekerja di daerahnya. | Persepsi Dunia Usaha                                                                              |
| 18                                           | Perilaku Masyarakat yang Non Diskriminasi                          | Mengukur daya dukung masyarakat sekitar tempat usaha dilihat dari perlakuannya terhadap orang lain dari luar secara sama tanpa melihat perbedaan yang ada (suku, agama, ras, gender dan sebagainya)                                         | Persepsi Dunia Usaha                                                                              |
| 19                                           | Adat Istiadat Masyarakat Daerah                                    | Melihat daya dukung nilai-nilai dan adat-istiadat yang berkembang di masyarakat yang mendukung produktivitas.                                                                                                                               | Persepsi Dunia Usaha                                                                              |
| 20                                           | Etos Kerja Masyarakat Daerah                                       | Mengukur daya dukung penduduk, masyarakat, pelaku usaha, dan pekerja di daerah yang menunjukkan etos kerja dan semangat kerja keras dan dapat bersaing secara sehat.                                                                        | Persepsi Dunia Usaha                                                                              |
| <b>C. FAKTOR EKONOMI DAERAH</b>              |                                                                    |                                                                                                                                                                                                                                             |                                                                                                   |
| <b>1. Variabel Potensi Ekonomi</b>           |                                                                    |                                                                                                                                                                                                                                             |                                                                                                   |
| 21                                           | Daya Beli Masyarakat                                               | Mengukur tingkat kesejahteraan dilihat dari penghasilan rata-rata masyarakat.                                                                                                                                                               | PDRB Perkapita Kabupaten/ Kota                                                                    |
| 22                                           | Pertumbuhan Ekonomi Daerah                                         | Melihat potensi ekonomi daerah dari proyeksi perkembangan atau pertumbuhan perekonomian di daerah.                                                                                                                                          | Laju Pertumbuhan PDRB Kabupaten / Kota tahun 1996 s/d 2001                                        |
| 23                                           | Kesejahteraan dan Produktivitas Masyarakat                         | Mengukur kesejahteraan dan produktivitas, kualitas hidup penduduk di daerah.                                                                                                                                                                | IPM (Indeks Pembangunan Manusia)                                                                  |
| <b>2. Variabel Struktur Ekonomi</b>          |                                                                    |                                                                                                                                                                                                                                             |                                                                                                   |
| 24                                           | Nilai Tambah Sektor Primer                                         | Untuk melihat struktur perekonomian daerah dan yang berbasis pada SDA                                                                                                                                                                       | Nilai Tambah Sektor Primer (Rasio PDRB Sektor Primer diluar Pertanian Pangan terhadap total PDRB) |
| 25                                           | Nilai Tambah Sektor Sekunder                                       | Mengukur struktur perekonomian daerah yang sudah terbiasa dalam kegiatan ekonomi produktif, dan industrialisasi.                                                                                                                            | Nilai Tambah Sektor Sekunder (Rasio PDRB Sektor Sekunder terhadap total PDRB)                     |
| 26                                           | Nilai Tambah Sektor Tersier                                        | Mengukur Kemampuan Jasa Lembaga Keuangan dalam perekonomian daerah.                                                                                                                                                                         | Nilai Tambah Sektor Tersier (Rasio PDRB Sektor Tersier terhadap total PDRB)                       |
| <b>D. FAKTOR KETENAGAKERJAAN</b>             |                                                                    |                                                                                                                                                                                                                                             |                                                                                                   |
| <b>1. Variabel Ketersediaan Tenaga Kerja</b> |                                                                    |                                                                                                                                                                                                                                             |                                                                                                   |
| 27                                           | Ketersediaan Tenaga Kerja Usia Produktif                           | Mengukur besarnya penduduk usia produktif yang dibutuhkan sebagai tenaga kerja pada kegiatan usaha.                                                                                                                                         | Rasio Jumlah Penduduk Usia Produktif terhadap Jumlah Penduduk Daerah Kab./ Kota                   |
| 28                                           | Ketersediaan Tenaga Kerja Berpengalaman Berpendidikan Minimal SLTP | Mengukur ketersediaan tenaga kerja yang sudah berpengalaman sebagai tenaga kerja pada sektor kegiatan usaha secara formal.                                                                                                                  | Rasio Jumlah Tenaga Kerja Berpendidikan SLTP terhadap Jumlah Tenaga Kerja di                      |

| NO.                                                        | FAKTOR -<br>VARIABEL - INDIKATOR             | KETERANGAN                                                                                                                            | UKURAN DAN DATA<br>YANG DIGUNAKAN                                                                        |
|------------------------------------------------------------|----------------------------------------------|---------------------------------------------------------------------------------------------------------------------------------------|----------------------------------------------------------------------------------------------------------|
|                                                            |                                              |                                                                                                                                       | Kabupaten/Kota                                                                                           |
| 29                                                         | Ketersediaan Tenaga Kerja<br>Pencari Kerja   | Mengukur ketersediaan pencari kerja untuk mengisi lapangan pekerjaan yang dibutuhkan oleh dunia usaha.                                | Rasio Penduduk Pencari Kerja Terhadap Jumlah Angkatan Kerja di Kabupaten / Kota                          |
| <b>2. Variabel Biaya Tenaga Kerja</b>                      |                                              |                                                                                                                                       |                                                                                                          |
| 30                                                         | Biaya Tenaga Kerja berdasarkan Aturan Formal | Mengukur tingkat kompensasi untuk pekerja secara keseluruhan berdasarkan aturan formal sebagai biaya yang dikeluarkan oleh pengusaha. | Rasio Upah Minimum Propinsi atau Kabupaten terhadap IHK                                                  |
| 31                                                         | Biaya Tenaga Kerja Aktual                    | Mengukur biaya tenaga kerja berdasarkan sektor-sektor usaha yang sesungguhnya akan dikeluarkan oleh pengusaha.                        | Rasio Upah Yang Diterima Pekerja terhadap IHK                                                            |
| <b>3. Variabel Produktivitas dan Kualitas Tenaga Kerja</b> |                                              |                                                                                                                                       |                                                                                                          |
| 32                                                         | Produktivitas Tenaga Kerja                   | Mengukur Produktivitas pekerja sektor manufaktur.                                                                                     | Rasio Nilai Tambah PDRB Sektor Manufaktur terhadap Jumlah Tenaga Kerja Manufaktur                        |
| <b>E. FAKTOR INFRASTRUKTUR</b>                             |                                              |                                                                                                                                       |                                                                                                          |
| <b>1. Variabel Ketersediaan Infrastruktur</b>              |                                              |                                                                                                                                       |                                                                                                          |
| 33                                                         | Ketersediaan Jalan                           | Mengukur Ketersediaan Infrastruktur untuk Transportasi Darat                                                                          | Rasio Panjang Jalan Yang ada di Kabupaten/Kota terhadap Luas Wilayah, Persepsi Pelaku Usaha              |
| 34                                                         | Ketersediaan Pelabuhan Laut                  | Mengukur Ketersediaan Infrastruktur Transportasi Laut                                                                                 | Keberadaan atau Jarak dengan Pelabuhan Laut (Km), Persepsi Pelaku Usaha                                  |
| 35                                                         | Ketersediaan Pelabuhan Udara                 | Mengukur Ketersediaan Infrastruktur Transportasi Udara.                                                                               | Keberadaan atau Jarak dengan Pelabuhan Udara (Km), Persepsi Pelaku Usaha                                 |
| 36                                                         | Ketersediaan Saluran (sambungan) Telpon      | Mengukur Ketersediaan Sarana Komunikasi.                                                                                              | Jumlah Sambungan Telpon Perkapita dan Persepsi Pelaku Usaha                                              |
| 37                                                         | Ketersediaan Saluran (sambungan) Listrik     | Mengukur Ketersediaan Listrik untuk Sebagai sumber Energi untuk Aktivitas Usaha.                                                      | Produksi Listrik / KWH listrik yang tersedia dan Persepsi Pelaku Usaha                                   |
| <b>2. Variabel Kualitas Infrastruktur</b>                  |                                              |                                                                                                                                       |                                                                                                          |
| 38                                                         | Kualitas Jalan                               | Mengukur kualitas infrastruktur fisik yang tersedia di daerah, sebagai penunjang kegiatan usaha.                                      | Rasio Panjang Jalan dengan kualitas baik terhadap total panjang jalan, Persepsi Pelaku Usaha             |
| 39                                                         | Akses & Tipe Pelabuhan Laut                  | Mengukur kemudahan akses, kelancaran, dan kapasitas sarana transportasi laut, sebagai penunjang kegiatan usaha.                       | Tipe dan Kapasitas Pelabuhan Laut serta Rata-rata Pemberangkatan Kapal Per-minggu, Persepsi Pelaku Usaha |
| 40                                                         | Akses & Tipe Pelabuhan Udara                 | Mengukur kemudahan dan kelancaran sarana transportasi udara yang tersedia di daerah untuk mempermudah aktivitas bisnis / usaha.       | Tipe Pelabuhan Udara dan Rata-rata Penerbangan Pesawat Perminggu, Persepsi Pelaku Usaha                  |
| 41                                                         | Kualitas Sambungan Telpon                    | Mengukur kualitas kelancaran sarana komunikasi di daerah                                                                              | Persepsi Pelaku Usaha, Daerah Kabupaten/Kota dan Propinsi Dalam Angka                                    |
| 42                                                         | Kualitas Suplai Listrik                      | Mengukur kualitas sumber energi sarana pendukung kegiatan usaha.                                                                      | Persepsi Pelaku Usaha, Daerah Kabupaten/Kota dan Propinsi Dalam Angka                                    |

## Lampiran 4.2. Metode Klasifikasi Intensitas Indikator Pemeringkatan

Sebelum diproses dengan perangkat lunak 'expert choice' untuk memperoleh skor intensitas tiap indikator berdasarkan metode AHP, setiap indikator yang berupa *existing statistic data* harus diklasifikasikan ke dalam intensitas yang sudah ditentukan (Sangat Tinggi, Tinggi, Sedang, Rendah, Sangat Rendah, dan sebagainya). Pengklasifikasian indikator ke dalam intensitas-intensitasnya dilakukan dengan menggunakan metode yang berikut ini :

### A. Sistem Klasifikasi Intensitas untuk Indikator

Dalam melakukan penilaian untuk menentukan daya tarik daerah terhadap investasi terlebih dahulu dilakukan klasifikasi intensitas setiap indikator, misalnya Tinggi, Sedang, Rendah, dan Sangat Rendah. Pengklasifikasian setiap sub indikator tersebut dilakukan dengan 2 macam pendekatan yaitu: (1) Metode A (Metode Rata-rata), dan (2) Metode B (Metode Distribusi).

#### Metode A

(Metode Rata-rata) adalah metode yang membandingkan besaran/nilai tiap daerah terhadap nilai rata-rata keseluruhan daerah. Semakin dekat dengan nilai rata-rata tertimbang keseluruhan daerah yang diperingkat, semakin besar klasifikasi intensitasnya, yang berarti kesenjangan antar daerah semakin berkurang.

#### Metode B

(Metode Distribusi) adalah metode rata-rata yang mempertimbangkan distribusi data. Penghitungan klasifikasi intensitas dengan metode ini disesuaikan dengan kemencengan dan keruncingan kurva sebaran data.

Pada dasarnya kedua metode tersebut

menggunakan nilai acuan tertentu sebagai dasar menentukan klasifikasi intensitas masing-masing indikator. Semakin kecil nilai indikator dibandingkan nilai acuannya, semakin kecil pula klasifikasi intensitas yang didapat. Sedangkan semakin besar nilai indikator dibandingkan nilai acuannya semakin besar pula klasifikasi intensitas yang didapat.

### B. Nilai Acuan

Nilai acuan untuk setiap indikator berbeda tergantung dari metode yang digunakan.

Metode A, misalnya, nilai acuan didasarkan pada nilai rata-rata dari indikator. Sebagai contoh, untuk menghitung klasifikasi intensitas indikator PDRB per kapita suatu daerah kabupaten, nilai acuan dihitung berdasarkan rata-rata indikator PDRB per kapita seluruh kabupaten/kota.

Pada metode B, nilai acuan didasarkan pada rata-rata nilai indikator dengan memperhatikan sebaran dan bentuknya yaitu *standar deviasi*, *kurtosis* (keruncingan), dan *skewness* (kemencengan).

### C. Alasan Penggunaan Metode

- 1 Alasan pemilihan metode A adalah bahwa:
  - Jika nilai indikator (misalnya : Nilai PDRB Perkapita atau Nilai Laju Pertumbuhan PDRB) suatu daerah mendekati nilai rata-rata, berarti bahwa persebaran nilai antar daerah semakin berkurang.
  - Dalam distribusi/keadaan normal, rata-rata = median = modus.
- 2 Alasan pemilihan metode B adalah bahwa distribusi nilai setiap indikator yang diteliti untuk menentukan daya tarik daerah terhadap invesatasi sangat beragam.

Sebagian indikator distribusi nilainya berbentuk menceng ke kiri, sebagian menceng kanan, dan beberapa diantaranya ada yang berpola mendekati distribusi normal. Oleh karena itu, untuk membuat klasifikasi intensitas tidak hanya didasarkan pada standar deviasi saja, tetapi juga melihat kemencengan (*skewness*) dan keruncingan (*kurtosis*)

#### D. Sistem Klasifikasi Intensitas Berbagai Macam Metode B

Dalam aplikasinya, metode B dikembangkan dalam beberapa bentuk yaitu B, B1, B2, B3, dan B4. Sistem klasifikasi intensitas untuk setiap metode B adalah sebagai berikut:

**Tabel 1:**  
**Penentuan Klasifikasi Intensitas Metode B**

| Klasifikasi Intensitas | Interval Nilai                                         |                                                        |
|------------------------|--------------------------------------------------------|--------------------------------------------------------|
|                        | Indikator Positif                                      | Indikator Negatif                                      |
| Sangat Tinggi          | $\bar{d} \geq X + SD$                                  | $\bar{d} \leq X - SD$                                  |
| Tinggi                 | $X + \frac{1}{2} SD \leq \bar{d} < X + SD$             | $X - \frac{1}{2} SD \leq \bar{d} < X - SD$             |
| Sedang                 | $X - \frac{1}{2} SD \leq \bar{d} < X + \frac{1}{2} SD$ | $X - \frac{1}{2} SD < \bar{d} \leq X + \frac{1}{2} SD$ |
| Rendah                 | $X - \frac{1}{2} SD < \bar{d} \leq X - SD$             | $X + \frac{1}{2} SD < \bar{d} \leq X + SD$             |
| Sangat Rendah          | $\bar{d} < X - SD$                                     | $\bar{d} > X + SD$                                     |

Keterangan :  $\bar{d}$  = Nilai Indikator ;  $\bar{X}$  = Rata-rata ; SD = Standar Deviasi

**Tabel 2 :**  
**Penentuan Klasifikasi Intensitas Metode B1**

| Klasifikasi Intensitas | Interval Nilai                                                           |                                                                          |
|------------------------|--------------------------------------------------------------------------|--------------------------------------------------------------------------|
|                        | Indikator Positif                                                        | Indikator Negatif                                                        |
| Sangat Tinggi          | $\bar{d} \geq X + \alpha_4 SD$                                           | $\bar{d} \leq X - \alpha_4 SD$                                           |
| Tinggi                 | $X + \frac{1}{2} \alpha_4 SD \leq \bar{d} < X + \alpha_4 SD$             | $X - \frac{1}{2} SD \leq \bar{d} < X - \alpha_4 SD$                      |
| Sedang                 | $X - \frac{1}{2} \alpha_4 SD \leq \bar{d} < X + \frac{1}{2} \alpha_4 SD$ | $X - \frac{1}{2} \alpha_4 SD < \bar{d} \leq X + \frac{1}{2} \alpha_4 SD$ |
| Rendah                 | $X - \frac{1}{2} \alpha_4 SD < \bar{d} \leq X - \alpha_4 SD$             | $X + \frac{1}{2} \alpha_4 SD < \bar{d} \leq X + \alpha_4 SD$             |
| Sangat Rendah          | $\bar{d} < X - \alpha_4 SD$                                              | $\bar{d} > X + \alpha_4 SD$                                              |

Keterangan :  $\bar{d}$  = Nilai Indikator ;  $\bar{X}$  = Rata-rata ;  $\alpha_4$  = Keruncingan ; SD = Standar Deviasi

**Tabel 3 :**  
**Penentuan Klasifikasi Intensitas Metode B2**

| Klasifikasi Intensitas | Interval Nilai                                                           |                                                                          |
|------------------------|--------------------------------------------------------------------------|--------------------------------------------------------------------------|
|                        | Indikator Positif                                                        | Indikator Negatif                                                        |
| Sangat Tinggi          | $\bar{d} \geq X + \alpha_3 SD$                                           | $\bar{d} \leq X - \alpha_3 SD$                                           |
| Tinggi                 | $X + \frac{1}{2} \alpha_3 SD \leq \bar{d} < X + \alpha_3 SD$             | $X - \frac{1}{2} SD \leq \bar{d} < X - \alpha_3 SD$                      |
| Sedang                 | $X - \frac{1}{2} \alpha_3 SD \leq \bar{d} < X + \frac{1}{2} \alpha_3 SD$ | $X - \frac{1}{2} \alpha_3 SD < \bar{d} \leq X + \frac{1}{2} \alpha_3 SD$ |
| Rendah                 | $X - \frac{1}{2} \alpha_3 SD < \bar{d} \leq X - \alpha_3 SD$             | $X + \frac{1}{2} \alpha_3 SD < \bar{d} \leq X + \alpha_3 SD$             |
| Sangat Rendah          | $\bar{d} < X - \alpha_3 SD$                                              | $\bar{d} > X + \alpha_3 SD$                                              |

Keterangan :  $\bar{d}$  = Nilai Indikator ;  $\bar{X}$  = Rata-rata ;  $\alpha_3$  = Kemencengan ; SD = Standar Deviasi

**Tabel 4 :**  
**Penentuan Klasifikasi Intensitas Metode B3**

| Klasifikasi Intensitas | Interval Nilai                                                         |                                                                        |
|------------------------|------------------------------------------------------------------------|------------------------------------------------------------------------|
|                        | Indikator Positif                                                      | Indikator Negatif                                                      |
| Sangat Tinggi          | $\bar{d} \geq X + \text{Met}$                                          | $\bar{d} \leq X - \text{Met}$                                          |
| Tinggi                 | $X + \frac{1}{2} \text{Met} \leq \bar{d} < X + \text{Met}$             | $X - \frac{1}{2} \text{Met} \leq \bar{d} < X - \text{Met}$             |
| Sedang                 | $X - \frac{1}{2} \text{Met} \leq \bar{d} < X + \frac{1}{2} \text{Met}$ | $X - \frac{1}{2} \text{Met} < \bar{d} \leq X + \frac{1}{2} \text{Met}$ |
| Rendah                 | $X - \frac{1}{2} \text{Met} < \bar{d} \leq X - \text{Met}$             | $X + \frac{1}{2} \text{Met} < \bar{d} \leq X + \text{Met}$             |
| Sangat Rendah          | $\bar{d} < X - \text{Met}$                                             | $\bar{d} > X + \text{Met}$                                             |

**Keterangan :**  $\bar{d}$  = Nilai Indikator ;  $X$  = Rata-rata ;  $\text{Met} = (\alpha_4 * \text{SD})$  jika  $\alpha_4 \leq 3$ , dan  $\text{Met} = (\alpha_3 * \text{SD})$  jika  $\alpha_4 > 3$ ,

**Tabel 5 :**  
**Penentuan Klasifikasi Intensitas Metode B4**

| Klasifikasi Intensitas | Interval Nilai                                                         |                                                                        |
|------------------------|------------------------------------------------------------------------|------------------------------------------------------------------------|
|                        | Indikator Positif                                                      | Indikator Negatif                                                      |
| Sangat Tinggi          | $\bar{d} \geq X + \text{Rat}$                                          | $\bar{d} \leq X - \text{Rat}$                                          |
| Tinggi                 | $X + \frac{1}{2} \text{Rat} \leq \bar{d} < X + \text{Rat}$             | $X - \frac{1}{2} \text{Rat} \leq \bar{d} < X - \text{Rat}$             |
| Sedang                 | $X - \frac{1}{2} \text{Rat} \leq \bar{d} < X + \frac{1}{2} \text{Rat}$ | $X - \frac{1}{2} \text{Rat} < \bar{d} \leq X + \frac{1}{2} \text{Rat}$ |
| Rendah                 | $X - \frac{1}{2} \text{Rat} < \bar{d} \leq X - \text{Rat}$             | $X + \frac{1}{2} \text{Rat} < \bar{d} \leq X + \text{Rat}$             |
| Sangat Rendah          | $\bar{d} < X - \text{Rat}$                                             | $\bar{d} > X + \text{Rat}$                                             |

**Keterangan :**  $\bar{d}$  = Nilai Indikator ;  $X$  = Rata-rata ;  $\text{Met} = ((\alpha_3 + \alpha_4)/2 \text{ R SD})$

E. Rumus-rumus yang digunakan

1. Rata-rata

$$\bar{x} = \frac{x_1 + x_2 + \dots + x_n}{n} \qquad \bar{x} = \frac{\sum_{i=1}^n x_i}{n}$$

2. Standar Deviasi

$$s^2 = \frac{\sum_{i=1}^n (x_i - \bar{x})^2}{n-1} \qquad s = \sqrt{\frac{\sum_{i=1}^n (x_i - \bar{x})^2}{n-1}}$$

3. Keruncingan

$$\alpha_4 = \frac{\sum_{i=1}^n (x_i - \bar{x})^4}{s^4}$$

4. Kemencengan

$$\alpha_3 = \frac{\sum_{i=1}^n (x_i - \bar{x})^3}{s^3}$$



Lampiran 4.3. Hasil Klasifikasi Indikator Pemeringkatan  
 Lampiran 4.3.1. Hasil Klasifikasi Indikator Faktor Kelembagaan  
 Lampiran 4.3.1.1.A. Indikator Rasio Retribusi Terhadap Pajak

| No. | Propinsi         | Kabupaten                  | Pos Pajak Daerah | Pos Retribusi Daerah | Rasio Retribusi thd Pajak | Intensitas |
|-----|------------------|----------------------------|------------------|----------------------|---------------------------|------------|
| 1   | Sumatera Utara   | Kab. Asahan                | 15.877,64        | 3.487,35             | 21,96                     | KKRSR      |
| 2   | Sumatera Utara   | Kab. Dairi                 | 941,00           | 2.717,30             | 288,77                    | KKRT       |
| 3   | Sumatera Utara   | Kab. Deli Serdang          | 19.824,00        | 9.959,00             | 50,24                     | KKRR       |
| 4   | Sumatera Utara   | Kab. Langkat               | 7.687,55         | 3.292,02             | 42,82                     | KKRSR      |
| 5   | Sumatera Utara   | Kab. Simalungun            | 10.102,50        | 5.453,72             | 53,98                     | KKRR       |
| 6   | Sumatera Utara   | Kab. Tanah Karo            | 2.339,80         | 3.761,95             | 160,78                    | KKRSD      |
| 7   | Sumatera Utara   | Kab. Labuhan Batu          | 3.989,00         | 4.023,68             | 100,87                    | KKRR       |
| 8   | Sumatera Utara   | Kab. Tapanuli Utara        | 1.046,25         | 4.682,83             | 447,58                    | KKRST      |
| 9   | Sumatera Barat   | Kab. Pesisir Selatan       | 977,13           | 3.335,98             | 341,41                    | KKRST      |
| 10  | Sumatera Barat   | Kab. Sawah Lunto Sijunjung | 2.377,00         | 5.049,90             | 212,45                    | KKRSD      |
| 11  | Sumatera Barat   | Kab. Pasaman               | 1.296,00         | 3.547,26             | 273,71                    | KKRT       |
| 12  | Sumatera Barat   | Kab. Solok                 | 1.400,00         | 2.074,50             | 148,18                    | KKRSD      |
| 13  | Riau             | Kab. Bengkalis             | 7.773,00         | 1.777,46             | 22,87                     | KKRSR      |
| 14  | Riau             | Kab. Indragiri Hilir       | 2.535,00         | 11.232,06            | 443,08                    | KKRST      |
| 15  | Riau             | Kab. Kampar                | 2.734,57         | 4.535,73             | 165,87                    | KKRSD      |
| 16  | Riau             | Kab. Kuantan Singingi      | 487,50           | 2.229,15             | 457,26                    | KKRST      |
| 17  | Riau             | Kab. Pelalawan             | 2.314,00         | 1.000,00             | 43,22                     | KKRSR      |
| 18  | Riau             | Kab. Rokan Hulu            | 560,00           | 2.070,14             | 369,67                    | KKRST      |
| 19  | Jambi            | Kab. Batanghari            | 918,50           | 5.084,61             | 553,58                    | KKRST      |
| 20  | Jambi            | Kab. Bungo                 | 873,37           | 6.722,77             | 769,75                    | KKRST      |
| 21  | Jambi            | Kab. Kerinci               | 1.296,20         | 2.748,18             | 212,02                    | KKRSD      |
| 22  | Jambi            | Kab. Tanjung Jabung Timur  | 578,10           | 1.392,90             | 240,94                    | KKRSD      |
| 23  | Jambi            | Kab. Tebo                  | 331,08           | 4.845,05             | 1.463,41                  | KKRST      |
| 24  | Sumatera Selatan | Kab. Muara Enim            | 9.335,15         | 2.301,97             | 24,66                     | KKRSR      |
| 25  | Sumatera Selatan | Kab. Musi Banyuasin        | 6.397,30         | 1.158,27             | 18,11                     | KKRSR      |
| 26  | Sumatera Selatan | Kab. Musi Rawas            | 1.876,03         | 5.271,12             | 280,97                    | KKRT       |
| 27  | Sumatera Selatan | Kab. Ogan Kemiling Ilir    | 1.492,00         | 2.040,17             | 136,74                    | KKRSD      |
| 28  | Sumatera Selatan | Kab. Lahat                 | 2.350,68         | 3.011,89             | 128,13                    | KKRSD      |
| 29  | Bangka Belitung  | Kab. Bangka                | 7.230,00         | 3.920,41             | 54,22                     | KKRR       |
| 30  | Bangka Belitung  | Kab. Belitung              | 10.899,37        | 2.166,93             | 19,88                     | KKRSR      |
| 31  | Bengkulu         | Kab. Bengkulu Selatan      | 2.484,75         | 3.488,24             | 140,39                    | KKRSD      |
| 32  | Lampung          | Kab. Lampung Barat         | 540,67           | 611,39               | 113,08                    | KKRR       |
| 33  | Lampung          | Kab. Lampung Selatan       | 2.162,50         | 3.439,72             | 159,06                    | KKRSD      |
| 34  | Lampung          | Kab. Lampung Timur         | 1.427,50         | 1.652,50             | 115,76                    | KKRSD      |
| 35  | Jawa Barat       | Kab. Bandung               | 32.475,00        | 24.671,44            | 75,97                     | KKRR       |
| 36  | Lampung          | Kab. Lampung Utara         | 1.880,00         | 3.342,79             | 177,81                    | KKRSD      |
| 37  | Lampung          | Kab. Way Kanan             | 189,90           | 400,59               | 210,94                    | KKRSD      |
| 38  | Banten           | Kab. Lebak                 | 880,73           | 7.037,24             | 799,03                    | KKRST      |
| 39  | Banten           | Kab. Serang                | 15.600,00        | 22.732,75            | 145,72                    | KKRSD      |
| 40  | Banten           | Kab. Tangerang             | 58.820,00        | 29.663,00            | 50,43                     | KKRR       |
| 41  | Jawa Barat       | Kab. Bekasi                | 23.925,14        | 15.723,74            | 65,72                     | KKRR       |
| 42  | Jawa Barat       | Kab. Bogor                 | 59.310,00        | 34.807,48            | 58,69                     | KKRR       |
| 43  | Jawa Barat       | Kab. Ciamis                | 3.115,00         | 11.707,00            | 375,83                    | KKRST      |
| 44  | Jawa Barat       | Kab. Cianjur               | 7.135,00         | 14.325,36            | 200,78                    | KKRSD      |
| 45  | Jawa Barat       | Kab. Cirebon               | 9.586,60         | 10.750,49            | 112,14                    | KKRR       |
| 46  | Jawa Barat       | Kab. Garut                 | 7.487,60         | 18.510,79            | 247,22                    | KKRSD      |
| 47  | Jawa Barat       | Kab. Indramayu             | 16.694,38        | 11.289,93            | 67,63                     | KKRR       |
| 48  | Jawa Barat       | Kab. Karawang              | 15.170,00        | 29.971,46            | 197,57                    | KKRSD      |
| 49  | Jawa Barat       | Kab. Kuningan              | 2.763,08         | 11.508,03            | 416,49                    | KKRST      |
| 50  | Jawa Barat       | Kab. Purwakarta            | 15.819,15        | 17.894,47            | 113,12                    | KKRR       |
| 51  | Jawa Barat       | Kab. Sukabumi              | 12.218,00        | 7.853,48             | 64,28                     | KKRR       |
| 52  | Jawa Barat       | Kab. Sumedang              | 11.087,50        | 16.173,52            | 145,87                    | KKRSD      |
| 53  | Jawa Barat       | Kab. Tasikmalaya           | 1.376,13         | 4.000,53             | 290,71                    | KKRT       |
| 54  | Jawa Barat       | Kab. Subang                | 5.550,00         | 15.577,78            | 280,68                    | KKRT       |
| 55  | Jawa Tengah      | Kab. Kendal                | 8.640,00         | 10.912,50            | 126,30                    | KKRSD      |
| 56  | Jawa Tengah      | Kab. Magelang              | 12.340,00        | 10.334,09            | 83,74                     | KKRR       |

| No. | Propinsi           | Kabupaten                | Pos Pajak Daerah | Pos Retribusi Daerah | Rasio Retribusi thd Pajak | Intensitas |
|-----|--------------------|--------------------------|------------------|----------------------|---------------------------|------------|
| 57  | Jawa Tengah        | Kab. Pekalongan          | 2.503,42         | 2.909,54             | 116,22                    | KKRSD      |
| 58  | Jawa Tengah        | Kab. Pemalang            | 3.903,44         | 8.918,78             | 228,49                    | KKRSD      |
| 59  | Jawa Tengah        | Kab. Sukoharjo           | 7.677,00         | 6.762,21             | 88,08                     | KKRR       |
| 60  | Jawa Tengah        | Kab. Tegal               | 4.719,50         | 12.771,49            | 270,61                    | KKRT       |
| 61  | Jawa Tengah        | Kab. Banyumas            | 5.880,68         | 16.411,89            | 279,08                    | KKRT       |
| 62  | Jawa Tengah        | Kab. Boyolali            | 3.134,05         | 12.884,81            | 411,12                    | KKRST      |
| 63  | Jawa Tengah        | Kab. Cilacap             | 14.360,00        | 12.658,54            | 88,15                     | KKRR       |
| 64  | Jawa Tengah        | Kab. Jepara              | 3.719,00         | 11.498,94            | 309,19                    | KKRT       |
| 65  | Jawa Tengah        | Kab. Karanganyar         | 6.047,00         | 8.721,16             | 144,22                    | KKRSD      |
| 66  | Jawa Tengah        | Kab. Klaten              | 5.805,00         | 6.371,60             | 109,76                    | KKRR       |
| 67  | Jawa Tengah        | Kab. Kudus               | 5.626,74         | 18.262,01            | 324,56                    | KKRT       |
| 68  | Jawa Tengah        | Kab. Kebumen             | 2.608,00         | 6.486,47             | 248,71                    | KKRSD      |
| 69  | DI. Yogyakarta     | Kab. Bantul              | 4.115,11         | 12.219,62            | 296,95                    | KKRT       |
| 70  | DI. Yogyakarta     | Kab. Gunung Kidul        | 1.407,91         | 7.802,78             | 554,21                    | KKRST      |
| 71  | Jawa Timur         | Kab. Bangkalan           | 2.577,82         | 6.046,16             | 234,55                    | KKRSD      |
| 72  | Jawa Timur         | Kab. Banyuwangi          | 7.326,00         | 11.048,63            | 150,81                    | KKRSD      |
| 73  | Jawa Timur         | Kab. Blitar              | 2.320,50         | 4.467,59             | 192,53                    | KKRSD      |
| 74  | Jawa Timur         | Kab. Kediri              | 4.289,79         | 6.687,80             | 155,90                    | KKRSD      |
| 75  | Jawa Timur         | Kab. Magetan             | 2.439,50         | 3.604,15             | 147,74                    | KKRSD      |
| 76  | Jawa Timur         | Kab. Mojokerto           | 8.324,20         | 7.650,20             | 91,90                     | KKRR       |
| 77  | Jawa Timur         | Kab. Pamekasan           | 1.755,50         | 4.851,29             | 276,35                    | KKRT       |
| 78  | Jawa Timur         | Kab. Pasuruan            | 18.050,00        | 8.124,00             | 45,01                     | KKRSR      |
| 79  | Jawa Timur         | Kab. Sidoarjo            | 28.100,00        | 39.194,13            | 139,48                    | KKRSD      |
| 80  | Jawa Timur         | Kab. Bondowoso           | 3.627,03         | 4.504,93             | 124,20                    | KKRSD      |
| 81  | Jawa Timur         | Kab. Gresik              | 18.849,00        | 5.647,00             | 29,96                     | KKRSR      |
| 82  | Jawa Timur         | Kab. Jember              | 6.325,50         | 17.269,76            | 273,02                    | KKRT       |
| 83  | Jawa Timur         | Kab. Jombang             | 3.942,00         | 5.064,05             | 128,46                    | KKRSD      |
| 84  | Jawa Timur         | Kab. Lamongan            | 4.289,79         | 6.687,80             | 155,90                    | KKRSD      |
| 85  | Jawa Timur         | Kab. Ponorogo            | 2.405,59         | 5.211,53             | 216,64                    | KKRSD      |
| 86  | Jawa Timur         | Kab. Tulungagung         | 4.165,00         | 8.995,55             | 215,98                    | KKRSD      |
| 87  | Bali               | Kab. Badung              | 220.625,00       | 3.364,00             | 1,52                      | KKRSR      |
| 88  | Bali               | Kab. Bangli              | 1.541,00         | 3.562,45             | 231,18                    | KKRSD      |
| 89  | Bali               | Kab. Buleleng            | 6.629,00         | 5.109,05             | 77,07                     | KKRR       |
| 90  | Bali               | Kab. Gianyar             | 40.046,67        | 14.346,16            | 35,82                     | KKRSR      |
| 91  | Bali               | Kab. Jembrana            | 1.348,95         | 3.245,55             | 240,60                    | KKRSD      |
| 92  | Bali               | Kab. Tabanan             | 11.390,19        | 13.023,70            | 114,34                    | KKRR       |
| 93  | Bali               | Kab. Karangasem          | 14.233,10        | 2.999,51             | 21,07                     | KKRSR      |
| 94  | Kalimantan Barat   | Kab. Kapuas Hulu         | 385,00           | 1.399,50             | 363,51                    | KKRST      |
| 95  | Kalimantan Barat   | Kab. Ketapang            | 1.107,04         | 2.418,43             | 218,46                    | KKRSD      |
| 96  | Kalimantan Barat   | Kab. Pontianak           | 2.651,07         | 948,15               | 35,76                     | KKRSR      |
| 97  | Kalimantan Barat   | Kab. Sambas              | 1.084,00         | 2.722,65             | 251,17                    | KKRSD      |
| 98  | Kalimantan Barat   | Kab. Sanggau             | 1.607,22         | 2.053,63             | 127,78                    | KKRSD      |
| 99  | Kalimantan Tengah  | Kab. Barito Selatan      | 2.107,50         | 3.341,00             | 158,53                    | KKRSD      |
| 100 | Kalimantan Tengah  | Kab. Barito Utara        | 637,98           | 1.330,15             | 208,49                    | KKRSD      |
| 101 | Kalimantan Tengah  | Kab. Kapuas              | 1.158,54         | 1.489,50             | 128,57                    | KKRSD      |
| 102 | Kalimantan Selatan | Kab. Hulu Sungai Selatan | 770,88           | 2.677,18             | 347,29                    | KKRST      |
| 103 | Kalimantan Selatan | Kab. Hulu Sungai Tengah  | 781,72           | 1.751,63             | 224,07                    | KKRSD      |
| 104 | Kalimantan Selatan | Kab. Hulu Sungai Utara   | 1.577,00         | 1.838,50             | 116,58                    | KKRSD      |
| 105 | Kalimantan Selatan | Kab. Tabalong            | 11.640,50        | 934,95               | 8,03                      | KKRSR      |
| 106 | Kalimantan Selatan | Kab. Tanah Laut          | 1.048,00         | 1.860,00             | 177,48                    | KKRSD      |
| 107 | Kalimantan Selatan | Kab. Tapin               | 729,70           | 348,50               | 47,76                     | KKRR       |
| 108 | Kalimantan Timur   | Kab. Berau               | 3.859,70         | 3.831,84             | 99,28                     | KKRR       |
| 109 | Kalimantan Timur   | Kab. Kutai               | 4.503,00         | 3.225,00             | 71,62                     | KKRR       |
| 110 | Kalimantan Timur   | Kab. Pasir               | 23.310,17        | 12.195,07            | 52,32                     | KKRR       |
| 111 | Kalimantan Timur   | Kab. Bulungan            | 321,50           | 664,15               | 206,58                    | KKRSD      |
| 112 | Kalimantan Timur   | Kab. Kutai Timur         | 2.083,00         | 1.150,00             | 55,21                     | KKRR       |

| No. | Propinsi            | Kabupaten                 | Pos Pajak Daerah | Pos Retribusi Daerah | Rasio Retribusi thd Pajak | Intensitas |
|-----|---------------------|---------------------------|------------------|----------------------|---------------------------|------------|
| 113 | Kalimantan Timur    | Kab. Nunukan              | 301,00           | 559,50               | 185,88                    | KKRSD      |
| 114 | Sulawesi Utara      | Kab. Minahasa             | 2.763,38         | 4.958,11             | 179,42                    | KKRSD      |
| 115 | Sulawesi Utara      | Kab. Sangihe              | 988,10           | 4.309,12             | 436,10                    | KKRST      |
| 116 | Gorontalo           | Kab. Gorontalo            | 1.146,81         | 4.172,92             | 363,87                    | KKRST      |
| 117 | Sulawesi Tengah     | Kab. Banggai              | 2.032,00         | 2.686,40             | 132,20                    | KKRSD      |
| 118 | Sulawesi Tengah     | Kab. Toli-Toli            | 9.259,65         | 883,98               | 9,55                      | KKRSR      |
| 119 | Sulawesi Tengah     | Kab. Donggala             | 2.402,00         | 2.203,69             | 91,74                     | KKRR       |
| 120 | Sulawesi Tengah     | Kab. Morowali             | 455,98           | 1.168,14             | 256,18                    | KKRT       |
| 121 | Sulawesi Tengah     | Kab. Poso                 | 757,32           | 2.234,58             | 295,07                    | KKRT       |
| 122 | Sulawesi Tenggara   | Kab. Buton                | 748,79           | 3.365,54             | 449,46                    | KKRST      |
| 123 | Sulawesi Tenggara   | Kab. Kolaka               | 8.485,50         | 5.645,00             | 66,53                     | KKRR       |
| 124 | Sulawesi Selatan    | Kab. Luwu                 | 2.002,91         | 8.586,54             | 428,70                    | KKRST      |
| 125 | Sulawesi Selatan    | Kab. Majene               | 506,15           | 838,53               | 165,67                    | KKRSD      |
| 126 | Sulawesi Selatan    | Kab. Pangkep              | 11.380,08        | 2.936,38             | 25,80                     | KKRSR      |
| 127 | Sulawesi Selatan    | Kab. Pinrang              | 1.948,65         | 2.870,29             | 147,30                    | KKRSD      |
| 128 | Sulawesi Selatan    | Kab. Tana Toraja          | 3.936,06         | 5.999,42             | 152,42                    | KKRSD      |
| 129 | Sulawesi Selatan    | Kab. Bantaeng             | 514,94           | 1.537,60             | 298,60                    | KKRT       |
| 130 | Sulawesi Selatan    | Kab. Barru                | 1.040,80         | 1.698,61             | 163,20                    | KKRSD      |
| 131 | Sulawesi Selatan    | Kab. Bone                 | 2.266,45         | 7.546,98             | 332,99                    | KKRST      |
| 132 | Sulawesi Selatan    | Kab. Enrekang             | 1.097,40         | 1.301,55             | 118,60                    | KKRSD      |
| 133 | Sulawesi Selatan    | Kab. Gowa                 | 5.210,31         | 5.984,17             | 114,85                    | KKRR       |
| 134 | Sulawesi Selatan    | Kab. Jeneponto            | 795,10           | 2.450,98             | 308,26                    | KKRT       |
| 135 | Sulawesi Selatan    | Kab. Luwu Utara           | 20.721,73        | 5.509,76             | 26,59                     | KKRSR      |
| 136 | Sulawesi Selatan    | Kab. Maros                | 6.017,08         | 4.315,01             | 71,71                     | KKRR       |
| 137 | Sulawesi Selatan    | Kab. Selayar              | 735,00           | 1.070,92             | 145,70                    | KKRSD      |
| 138 | Sulawesi Selatan    | Kab. Sinjai               | 649,28           | 3.203,42             | 493,38                    | KKRST      |
| 139 | Sulawesi Selatan    | Kab. Takalar              | 852,50           | 2.308,18             | 270,75                    | KKRT       |
| 140 | Nusa Tenggara Barat | Kab. Bima                 | 6.905,30         | 5.153,90             | 74,64                     | KKRR       |
| 141 | Nusa Tenggara Barat | Kab. Lombok Barat         | 13.605,00        | 4.287,97             | 31,52                     | KKRSR      |
| 142 | Nusa Tenggara Barat | Kab. Dompu                | 1.206,04         | 2.134,13             | 176,95                    | KKRSD      |
| 143 | Nusa Tenggara Barat | Kab. Lombok Timur         | 1.814,29         | 8.062,40             | 444,38                    | KKRST      |
| 144 | Nusa Tenggara Timur | Kab. Ende                 | 1.108,79         | 2.668,49             | 240,67                    | KKRSD      |
| 145 | Nusa Tenggara Timur | Kab. Flores Timur         | 693,80           | 1.519,20             | 218,97                    | KKRSD      |
| 146 | Nusa Tenggara Timur | Kab. Timur Tengah Selatan | 1.139,98         | 3.279,09             | 287,64                    | KKRT       |
| 147 | Nusa Tenggara Timur | Kab. Timur Tengah Utara   | 572,18           | 1.842,10             | 321,94                    | KKRT       |
| 148 | Nusa Tenggara Timur | Kab. Belu                 | 2.367,00         | 2.560,32             | 108,17                    | KKRR       |
| 149 | Nusa Tenggara Timur | Kab. Manggarai            | 1.412,83         | 3.472,49             | 245,78                    | KKRSD      |
| 150 | Nusa Tenggara Timur | Kab. Ngada                | 539,50           | 2.142,26             | 397,08                    | KKRST      |
| 151 | Nusa Tenggara Timur | Kab. Sumba Barat          | 547,30           | 1.760,08             | 321,59                    | KKRT       |
| 152 | Irian Jaya Barat    | Kab. Fak-Fak              | 482,00           | 381,10               | 79,07                     | KKRR       |
| 153 | Irian Jaya Barat    | Kab. Manokwari            | 377,50           | 695,85               | 184,33                    | KKRSD      |
| 154 | Irian Jaya Barat    | Kab. Sorong               | 195,90           | 1.391,30             | 710,21                    | KKRST      |
| 155 | Papua               | Kab. Jayawijaya           | 432,50           | 896,00               | 207,17                    | KKRSD      |
| 156 | Papua               | Kab. Mimika               | 7.658,80         | 1.210,69             | 15,81                     | KKRSR      |

**Keterangan :**

**KKR** : Kelembagaan - Keuangan Daerah - Rasio Retribusi/Pajak  
Dibelakang **KKR** - **ST** : Sangat Tinggi  
**T** : Tinggi  
**SD** : Sedang  
**R** : Rendah  
**SR** : Sangat Rendah

|            |        |        |
|------------|--------|--------|
| Rata-rata  | 185,63 |        |
| Stand. Dev | 140,15 |        |
|            |        |        |
| KKRST      | 325,78 |        |
| KKRT       | 255,71 | 325,78 |
| KKRSD      | 115,56 | 255,71 |
| KKRR       | 115,56 | 45,49  |
| KKRSR      | 45,49  |        |

Lampiran 4.3.1.1.B. Indikator Rasio Retribusi Terhadap Pajak

| No. | Propinsi            | Kota                  | Pos Pajak Daerah | Pos Retribusi Daerah | Rasio Retribusi thd Pajak | Intensitas |
|-----|---------------------|-----------------------|------------------|----------------------|---------------------------|------------|
| 1   | Sumatera Utara      | Kota Binjai           | 1.857,50         | 2.954,41             | 159,05                    | KKRSD      |
| 2   | Sumatera Utara      | Kota Medan            | 70.800,00        | 52.276,21            | 73,84                     | KKRR       |
| 3   | Sumatera Utara      | Kota Pematang Siantar | 4.200,00         | 5.830,66             | 138,83                    | KKRSD      |
| 4   | Sumatera Utara      | Kota Sibolga          | 526,80           | 1.951,31             | 370,41                    | KKRST      |
| 5   | Sumatera Utara      | Kota Tanjung Balai    | 2.271,86         | 3.419,23             | 150,50                    | KKRSD      |
| 6   | Sumatera Utara      | Kota Tebing Tinggi    | 1.830,79         | 2.018,09             | 110,23                    | KKRR       |
| 7   | Sumatera Barat      | Kota Padang           | 35.680,00        | 14.772,43            | 41,40                     | KKRSR      |
| 8   | Sumatera Barat      | Kota Sawahlunto       | 310,24           | 800,86               | 258,14                    | KKRT       |
| 9   | Riau                | Kota Batam            | 23.050,00        | 22.105,00            | 95,90                     | KKRR       |
| 10  | Riau                | Kota Pekanbaru        | 17.145,00        | 18.243,04            | 106,40                    | KKRR       |
| 11  | Riau                | Kota Dumai            | 3.004,15         | 2.302,49             | 76,64                     | KKRR       |
| 12  | Sumatera Selatan    | Kota Palembang        | 18.053,77        | 17.161,48            | 95,06                     | KKRR       |
| 13  | Bangka Belitung     | Kota Pangkal Pinang   | 1.837,65         | 4.857,90             | 264,35                    | KKRT       |
| 14  | Bengkulu            | Kota Bengkulu         | 1.865,00         | 2.916,07             | 156,36                    | KKRSD      |
| 15  | Lampung             | Kota Bandar Lampung   | 19.275,00        | 9.978,00             | 51,77                     | KKRR       |
| 16  | Banten              | Kota Tangerang        | 39.525,00        | 17.039,50            | 43,11                     | KKRSR      |
| 17  | Banten              | Kota Cilegon          | 32.695,00        | 1.687,60             | 5,16                      | KKRSR      |
| 18  | DKI Jakarta         | Kota DKI Jakarta      | 3.101.000,00     | 251.550,07           | 8,11                      | KKRSR      |
| 19  | Jawa Barat          | Kota Bandung          | 85.000,00        | 61.654,90            | 72,54                     | KKRR       |
| 20  | Jawa Barat          | Kota Bekasi           | 24.959,79        | 29.648,38            | 118,78                    | KKRSD      |
| 21  | Jawa Barat          | Kota Bogor            | 13.306,70        | 12.874,55            | 96,75                     | KKRR       |
| 22  | Jawa Barat          | Kota Cirebon          | 5.135,88         | 6.947,50             | 135,27                    | KKRSD      |
| 23  | Jawa Barat          | Kota Sukabumi         | 1.328,00         | 12.735,72            | 959,02                    | KKRST      |
| 24  | Jawa Tengah         | Kota Pekalongan       | 4.008,48         | 2.993,94             | 74,69                     | KKRR       |
| 25  | Jawa Tengah         | Kota Semarang         | 51.922,30        | 30.717,27            | 59,16                     | KKRR       |
| 26  | Jawa Tengah         | Kota Tegal            | 3.372,11         | 11.529,45            | 341,91                    | KKRST      |
| 27  | Jawa Tengah         | Kota Surakarta        | 20.450,00        | 20.967,28            | 102,53                    | KKRR       |
| 28  | DI. Yogyakarta      | Kota Yogyakarta       | 20.196,23        | 12.698,67            | 62,88                     | KKRR       |
| 29  | Jawa Timur          | Kota Kediri           | 3.097,00         | 3.043,86             | 98,28                     | KKRR       |
| 30  | Jawa Timur          | Kota Malang           | 11.810,00        | 10.999,12            | 93,13                     | KKRR       |
| 31  | Jawa Timur          | Kota Mojokerto        | 2.191,10         | 3.450,47             | 157,48                    | KKRSD      |
| 32  | Jawa Timur          | Kota Probolinggo      | 2.834,93         | 7.290,67             | 257,17                    | KKRT       |
| 33  | Jawa Timur          | Kota Surabaya         | 129.500,00       | 80.232,41            | 61,96                     | KKRR       |
| 34  | Jawa Timur          | Kota Madiun           | 2.119,37         | 2.443,38             | 115,29                    | KKRR       |
| 35  | Bali                | Kota Denpasar         | 60.350,00        | 26.137,00            | 43,31                     | KKRSR      |
| 36  | Kalimantan Timur    | Kota Balikpapan       | 22.310,17        | 12.195,07            | 54,66                     | KKRR       |
| 37  | Kalimantan Timur    | Kota Samarinda        | 11.950,00        | 18.502,50            | 154,83                    | KKRSD      |
| 38  | Sulawesi Utara      | Kota Bitung           | 3.152,75         | 4.756,36             | 150,86                    | KKRSD      |
| 39  | Sulawesi Utara      | Kota Manado           | 15.486,00        | 12.116,62            | 78,24                     | KKRR       |
| 40  | Gorontalo           | Kota Gorontalo        | 1.381,90         | 5.137,00             | 371,73                    | KKRST      |
| 41  | Sulawesi Tenggara   | Kota Kendari          | 5.188,45         | 3.455,60             | 66,60                     | KKRR       |
| 42  | Sulawesi Selatan    | Kota Pare-Pare        | 1.468,52         | 5.863,66             | 399,29                    | KKRST      |
| 43  | Nusa Tenggara Barat | Kota Mataram          | 6.465,00         | 5.614,92             | 86,85                     | KKRR       |
| 44  | Nusa Tenggara Timur | Kota Kupang           | 4.271,00         | 2.686,86             | 62,91                     | KKRR       |

**Keterangan :**

**KKR** : Kelembagaan - Keuangan Daerah - Rasio Retribusi/Pajak  
Dibelakang **KKR** - **ST** : Sangat Tinggi  
**T** : Tinggi  
**SD** : Sedang  
**R** : Rendah  
**SR** : Sangat Rendah

|            |        |        |
|------------|--------|--------|
| Rata-rata  | 185,63 |        |
| Stand. Dev | 140,15 |        |
|            |        |        |
| KKRST      | 325,78 |        |
| KKRT       | 255,71 | 325,78 |
| KKRSD      | 115,56 | 255,71 |
| KKRR       | 115,56 | 45,49  |
| KKRSR      | 45,49  |        |

Lampiran 4.3.1.2.A. Indikator Rasio Anggaran Pembangunan Terhadap APBD

| No. | Propinsi         | Kabupaten                  | Total Pengeluaran Rutin dan Pembangunan (tidak termasuk UKP) | Total Pengeluaran Pembangunan (tidak termasuk UKP) | Rasio | Intensitas |
|-----|------------------|----------------------------|--------------------------------------------------------------|----------------------------------------------------|-------|------------|
| 1   | Sumatera Utara   | Kab. Asahan                | 326.154,80                                                   | 95.616,40                                          | 29,32 | KKASD      |
| 2   | Sumatera Utara   | Kab. Dairi                 | 167.177,17                                                   | 47.892,43                                          | 28,65 | KKASD      |
| 3   | Sumatera Utara   | Kab. Deli Serdang          | 506.551,61                                                   | 95.066,52                                          | 18,77 | KKAR       |
| 4   | Sumatera Utara   | Kab. Langkat               | 327.160,14                                                   | 84.495,01                                          | 25,83 | KKASD      |
| 5   | Sumatera Utara   | Kab. Simalungun            | 367.084,04                                                   | 114.871,99                                         | 31,29 | KKASD      |
| 6   | Sumatera Utara   | Kab. Tanah Karo            | 180.999,80                                                   | 40.200,00                                          | 22,21 | KKAR       |
| 7   | Sumatera Utara   | Kab. Labuhan Batu          | 278.091,88                                                   | 64.288,36                                          | 23,12 | KKASD      |
| 8   | Sumatera Utara   | Kab. Tapanuli Utara        | 256.771,62                                                   | 80.842,22                                          | 31,48 | KKASD      |
| 9   | Sumatera Barat   | Kab. Pesisir Selatan       | 185.355,58                                                   | 40.085,82                                          | 21,63 | KKAR       |
| 10  | Sumatera Barat   | Kab. Sawah Lunto Sijunjung | 204.528,61                                                   | 65.808,64                                          | 32,18 | KKASD      |
| 11  | Sumatera Barat   | Kab. Pasaman               | 220.853,84                                                   | 64.210,55                                          | 29,07 | KKASD      |
| 12  | Sumatera Barat   | Kab. Solok                 | 227.909,93                                                   | 63.428,70                                          | 27,83 | KKASD      |
| 13  | Riau             | Kab. Bengkalis             | 1.433.679,95                                                 | 1.028.503,35                                       | 71,74 | KKAST      |
| 14  | Riau             | Kab. Indragiri Hilir       | 397.063,85                                                   | 218.946,89                                         | 55,14 | KKAST      |
| 15  | Riau             | Kab. Kampar                | 577.179,01                                                   | 299.625,42                                         | 51,91 | KKAST      |
| 16  | Riau             | Kab. Kuantan Singingi      | 298.060,13                                                   | 179.466,53                                         | 60,21 | KKAST      |
| 17  | Riau             | Kab. Pelalawan             | 332.580,68                                                   | 222.592,74                                         | 66,93 | KKAST      |
| 18  | Riau             | Kab. Rokan Hulu            | 281.844,63                                                   | 137.041,56                                         | 48,62 | KKAST      |
| 19  | Jambi            | Kab. Batanghari            | 151.125,61                                                   | 58.801,14                                          | 38,91 | KKAT       |
| 20  | Jambi            | Kab. Bungo                 | 165.519,46                                                   | 46.797,23                                          | 28,27 | KKASD      |
| 21  | Jambi            | Kab. Kerinci               | 199.292,75                                                   | 57.204,70                                          | 28,70 | KKASD      |
| 22  | Jambi            | Kab. Tanjung Jabung Timur  | 138.602,79                                                   | 55.221,34                                          | 39,84 | KKAT       |
| 23  | Jambi            | Kab. Tebo                  | 143.148,27                                                   | 72.868,19                                          | 50,90 | KKAST      |
| 24  | Sumatera Selatan | Kab. Muara Enim            | 362.514,95                                                   | 114.517,39                                         | 31,59 | KKASD      |
| 25  | Sumatera Selatan | Kab. Musi Banyuasin        | 470.556,31                                                   | 231.267,48                                         | 49,15 | KKAST      |
| 26  | Sumatera Selatan | Kab. Musi Rawas            | 312.078,36                                                   | 139.475,38                                         | 44,69 | KKAST      |
| 27  | Sumatera Selatan | Kab. Ogan Kemiling Ilir    | 343.507,20                                                   | 142.185,92                                         | 41,39 | KKAT       |
| 28  | Sumatera Selatan | Kab. Lahat                 | 230.129,38                                                   | 49.114,01                                          | 21,34 | KKAR       |
| 29  | Bangka Belitung  | Kab. Bangka                | 244.583,08                                                   | 99.714,28                                          | 40,77 | KKAT       |
| 30  | Bangka Belitung  | Kab. Belitung              | 150.184,52                                                   | 24.888,44                                          | 16,57 | KKAR       |
| 31  | Bengkulu         | Kab. Bengkulu Selatan      | 214.066,01                                                   | 34.148,97                                          | 15,95 | KKASR      |
| 32  | Lampung          | Kab. Lampung Barat         | 170.983,82                                                   | 64.161,70                                          | 37,53 | KKAT       |
| 33  | Lampung          | Kab. Lampung Selatan       | 309.537,04                                                   | 52.811,96                                          | 17,06 | KKAR       |
| 34  | Lampung          | Kab. Lampung Timur         | 250.029,94                                                   | 23.977,01                                          | 9,59  | KKASR      |
| 35  | Lampung          | Kab. Lampung Utara         | 246.413,38                                                   | 63.486,69                                          | 25,76 | KKASD      |
| 36  | Jawa Barat       | Kab. Bandung               | 874.915,64                                                   | 248.033,06                                         | 28,35 | KKASD      |
| 37  | Lampung          | Kab. Way Kanan             | 143.190,23                                                   | 74.033,93                                          | 51,70 | KKAST      |
| 38  | Banten           | Kab. Lebak                 | 238.440,24                                                   | 70.939,19                                          | 29,75 | KKASD      |
| 39  | Banten           | Kab. Serang                | 346.371,89                                                   | 60.647,27                                          | 17,51 | KKAR       |
| 40  | Banten           | Kab. Tangerang             | 589.381,94                                                   | 190.867,18                                         | 32,38 | KKASD      |
| 41  | Jawa Barat       | Kab. Bekasi                | 473.843,59                                                   | 193.629,73                                         | 40,86 | KKAT       |
| 42  | Jawa Barat       | Kab. Bogor                 | 716.407,10                                                   | 210.187,37                                         | 29,34 | KKASD      |
| 43  | Jawa Barat       | Kab. Ciamis                | 433.024,79                                                   | 35.520,20                                          | 8,20  | KKASR      |
| 44  | Jawa Barat       | Kab. Cianjur               | 406.840,70                                                   | 94.925,80                                          | 23,33 | KKASD      |
| 45  | Jawa Barat       | Kab. Cirebon               | 403.028,07                                                   | 95.780,51                                          | 23,77 | KKASD      |
| 46  | Jawa Barat       | Kab. Garut                 | 473.624,97                                                   | 50.661,49                                          | 10,70 | KKASR      |
| 47  | Jawa Barat       | Kab. Indramayu             | 366.695,89                                                   | 104.083,97                                         | 28,38 | KKASD      |
| 48  | Jawa Barat       | Kab. Karawang              | 427.730,90                                                   | 129.415,50                                         | 30,26 | KKASD      |
| 49  | Jawa Barat       | Kab. Kuningan              | 270.287,56                                                   | 23.015,50                                          | 8,52  | KKASR      |
| 50  | Jawa Barat       | Kab. Purwakarta            | 239.228,35                                                   | 46.244,81                                          | 19,33 | KKAR       |
| 51  | Jawa Barat       | Kab. Sukabumi              | 394.419,54                                                   | 117.637,94                                         | 29,83 | KKASD      |
| 52  | Jawa Barat       | Kab. Sumedang              | 322.011,70                                                   | 33.867,46                                          | 10,52 | KKASR      |
| 53  | Jawa Barat       | Kab. Tasikmalaya           | 381.700,07                                                   | 29.143,02                                          | 7,64  | KKASR      |
| 54  | Jawa Barat       | Kab. Subang                | 327.045,49                                                   | 69.478,93                                          | 21,24 | KKAR       |
| 55  | Jawa Tengah      | Kab. Kendal                | 240.916,65                                                   | 13.989,60                                          | 5,81  | KKASR      |
| 56  | Jawa Tengah      | Kab. Magelang              | 427.470,76                                                   | 98.830,68                                          | 23,12 | KKASD      |

| No. | Propinsi           | Kabupaten                | Total Pengeluaran<br>Rutin dan<br>Pembangunan<br>(tidak termasuk<br>UKP) | Total Pengeluaran<br>Pembangunan<br>(tidak termasuk<br>UKP) | Rasio | Intensitas |
|-----|--------------------|--------------------------|--------------------------------------------------------------------------|-------------------------------------------------------------|-------|------------|
| 57  | Jawa Tengah        | Kab. Pekalongan          | 251.161,12                                                               | 51.876,96                                                   | 20,65 | KKAR       |
| 58  | Jawa Tengah        | Kab. Pemalang            | 268.239,83                                                               | 40.962,66                                                   | 15,27 | KKASR      |
| 59  | Jawa Tengah        | Kab. Sukoharjo           | 251.570,46                                                               | 29.759,88                                                   | 11,83 | KKASR      |
| 60  | Jawa Tengah        | Kab. Tegal               | 343.401,32                                                               | 92.940,57                                                   | 27,06 | KKASD      |
| 61  | Jawa Tengah        | Kab. Banyumas            | 366.052,74                                                               | 46.641,68                                                   | 12,74 | KKASR      |
| 62  | Jawa Tengah        | Kab. Boyolali            | 288.274,51                                                               | 39.062,81                                                   | 13,55 | KKASR      |
| 63  | Jawa Tengah        | Kab. Cilacap             | 382.151,77                                                               | 66.409,27                                                   | 17,38 | KKAR       |
| 64  | Jawa Tengah        | Kab. Jepara              | 270.403,55                                                               | 73.855,58                                                   | 27,31 | KKASD      |
| 65  | Jawa Tengah        | Kab. Karanganyar         | 266.943,82                                                               | 39.700,65                                                   | 14,87 | KKASR      |
| 66  | Jawa Tengah        | Kab. Klaten              | 375.244,56                                                               | 37.536,90                                                   | 10,00 | KKASR      |
| 67  | Jawa Tengah        | Kab. Kudus               | 167.246,78                                                               | 56.593,26                                                   | 33,84 | KKASD      |
| 68  | Jawa Tengah        | Kab. Kebumen             | 321.918,74                                                               | 52.225,06                                                   | 16,22 | KKAR       |
| 69  | DI. Yogyakarta     | Kab. Bantul              | 340.608,13                                                               | 53.714,78                                                   | 15,77 | KKASR      |
| 70  | DI. Yogyakarta     | Kab. Gunung Kidul        | 240.216,55                                                               | 39.091,80                                                   | 16,27 | KKAR       |
| 71  | Jawa Timur         | Kab. Bangkalan           | 227.607,56                                                               | 49.237,92                                                   | 21,63 | KKAR       |
| 72  | Jawa Timur         | Kab. Banyuwangi          | 387.867,20                                                               | 77.119,54                                                   | 19,88 | KKAR       |
| 73  | Jawa Timur         | Kab. Blitar              | 301.460,68                                                               | 24.896,09                                                   | 8,26  | KKASR      |
| 74  | Jawa Timur         | Kab. Kediri              | 322.726,22                                                               | 55.490,55                                                   | 17,19 | KKAR       |
| 75  | Jawa Timur         | Kab. Magetan             | 267.055,89                                                               | 43.208,76                                                   | 16,18 | KKAR       |
| 76  | Jawa Timur         | Kab. Mojokerto           | 296.638,82                                                               | 62.281,00                                                   | 21,00 | KKAR       |
| 77  | Jawa Timur         | Kab. Pamekasan           | 229.012,57                                                               | 43.799,23                                                   | 19,13 | KKAR       |
| 78  | Jawa Timur         | Kab. Pasuruan            | 565.664,97                                                               | 150.049,93                                                  | 26,53 | KKASD      |
| 79  | Jawa Timur         | Kab. Sidoarjo            | 438.912,63                                                               | 104.209,13                                                  | 23,74 | KKASD      |
| 80  | Jawa Timur         | Kab. Bondowoso           | 250.675,43                                                               | 26.141,54                                                   | 10,43 | KKASR      |
| 81  | Jawa Timur         | Kab. Gresik              | 250.675,43                                                               | 52.414,95                                                   | 20,91 | KKAR       |
| 82  | Jawa Timur         | Kab. Jember              | 508.141,15                                                               | 143.755,66                                                  | 28,29 | KKASD      |
| 83  | Jawa Timur         | Kab. Jombang             | 311.654,31                                                               | 87.942,39                                                   | 28,22 | KKASD      |
| 84  | Jawa Timur         | Kab. Lamongan            | 298.657,57                                                               | 65.628,20                                                   | 21,97 | KKAR       |
| 85  | Jawa Timur         | Kab. Ponorogo            | 275.771,44                                                               | 60.412,65                                                   | 21,91 | KKAR       |
| 86  | Jawa Timur         | Kab. Tulungagung         | 295.306,64                                                               | 51.341,94                                                   | 17,39 | KKAR       |
| 87  | Bali               | Kab. Badung              | 455.605,82                                                               | 242.602,72                                                  | 53,25 | KKAST      |
| 88  | Bali               | Kab. Bangli              | 137.310,05                                                               | 31.291,82                                                   | 22,79 | KKAR       |
| 89  | Bali               | Kab. Buleleng            | 261.099,68                                                               | 40.098,93                                                   | 15,36 | KKASR      |
| 90  | Bali               | Kab. Gianyar             | 351.123,31                                                               | 137.928,82                                                  | 39,28 | KKAT       |
| 91  | Bali               | Kab. Jembrana            | 159.962,80                                                               | 20.431,01                                                   | 12,77 | KKASR      |
| 92  | Bali               | Kab. Tabanan             | 266.158,98                                                               | 74.411,77                                                   | 27,96 | KKASD      |
| 93  | Bali               | Kab. Karangasem          | 229.191,30                                                               | 70.280,33                                                   | 30,66 | KKASD      |
| 94  | Kalimantan Barat   | Kab. Kapuas Hulu         | 209.460,63                                                               | 83.978,39                                                   | 40,09 | KKAT       |
| 95  | Kalimantan Barat   | Kab. Ketapang            | 303.795,27                                                               | 131.483,88                                                  | 43,28 | KKAST      |
| 96  | Kalimantan Barat   | Kab. Pontianak           | 226.245,70                                                               | 47.442,89                                                   | 20,97 | KKAR       |
| 97  | Kalimantan Barat   | Kab. Sambas              | 214.126,80                                                               | 69.169,16                                                   | 32,30 | KKASD      |
| 98  | Kalimantan Barat   | Kab. Sanggau             | 234.556,67                                                               | 65.773,45                                                   | 28,04 | KKASD      |
| 99  | Kalimantan Tengah  | Kab. Barito Selatan      | 83.995,70                                                                | 55.378,17                                                   | 65,93 | KKAST      |
| 100 | Kalimantan Tengah  | Kab. Barito Utara        | 208.167,23                                                               | 93.602,76                                                   | 44,97 | KKAST      |
| 101 | Kalimantan Tengah  | Kab. Kapuas              | 329.484,67                                                               | 116.605,30                                                  | 35,39 | KKAT       |
| 102 | Kalimantan Selatan | Kab. Hulu Sungai Selatan | 155.258,62                                                               | 47.195,61                                                   | 30,40 | KKASD      |
| 103 | Kalimantan Selatan | Kab. Hulu Sungai Tengah  | 159.655,40                                                               | 48.872,38                                                   | 30,61 | KKASD      |
| 104 | Kalimantan Selatan | Kab. Hulu Sungai Utara   | 164.411,80                                                               | 42.147,22                                                   | 25,64 | KKASD      |
| 105 | Kalimantan Selatan | Kab. Tabalong            | 145.347,10                                                               | 44.812,72                                                   | 30,83 | KKASD      |
| 106 | Kalimantan Selatan | Kab. Tanah Laut          | 157.337,06                                                               | 47.138,36                                                   | 29,96 | KKASD      |
| 107 | Kalimantan Selatan | Kab. Tapin               | 108.205,65                                                               | 23.808,11                                                   | 22,00 | KKAR       |
| 108 | Kalimantan Timur   | Kab. Berau               | 418.068,51                                                               | 236.940,49                                                  | 56,68 | KKAST      |
| 109 | Kalimantan Timur   | Kab. Kutai               | 1.693.031,01                                                             | 1.089.168,79                                                | 64,33 | KKAST      |
| 110 | Kalimantan Timur   | Kab. Pasir               | 486.593,39                                                               | 294.463,54                                                  | 60,52 | KKAST      |
| 111 | Kalimantan Timur   | Kab. Bulungan            | 463.952,77                                                               | 239.306,05                                                  | 51,58 | KKAST      |
| 112 | Kalimantan Timur   | Kab. Kutai Timur         | 837.710,00                                                               | 548.570,00                                                  | 65,48 | KKAST      |

| No. | Propinsi            | Kabupaten                 | Total Pengeluaran Rutin dan Pembangunan (tidak termasuk UKP) | Total Pengeluaran Pembangunan (tidak termasuk UKP) | Rasio | Intensitas |
|-----|---------------------|---------------------------|--------------------------------------------------------------|----------------------------------------------------|-------|------------|
| 113 | Kalimantan Timur    | Kab. Nunukan              | 334.483,89                                                   | 209.193,25                                         | 62,54 | KKAST      |
| 114 | Sulawesi Utara      | Kab. Minahasa             | 342.174,43                                                   | -                                                  | -     | KKASR      |
| 115 | Sulawesi Utara      | Kab. Sangihe              | 176.580,25                                                   | 18.356,81                                          | 10,40 | KKASR      |
| 116 | Gorontalo           | Kab. Gorontalo            | 207.252,41                                                   | 44.036,83                                          | 21,25 | KKAR       |
| 117 | Sulawesi Tengah     | Kab. Banggai              | 171.432,08                                                   | 49.941,21                                          | 29,13 | KKASD      |
| 118 | Sulawesi Tengah     | Kab. Toli-Toli            | 136.185,09                                                   | 45.294,43                                          | 33,26 | KKASD      |
| 119 | Sulawesi Tengah     | Kab. Donggala             | 21.572,79                                                    | 250,00                                             | 1,16  | KKASR      |
| 120 | Sulawesi Tengah     | Kab. Morowali             | 146.769,70                                                   | 53.610,78                                          | 36,53 | KKAT       |
| 121 | Sulawesi Tengah     | Kab. Poso                 | 238.173,64                                                   | 76.575,99                                          | 32,15 | KKASD      |
| 122 | Sulawesi Tenggara   | Kab. Buton                | 210.505,01                                                   | 52.064,78                                          | 24,73 | KKASD      |
| 123 | Sulawesi Tenggara   | Kab. Kolaka               | 192.077,41                                                   | 54.122,41                                          | 28,18 | KKASD      |
| 124 | Sulawesi Selatan    | Kab. Luwu                 | 211.712,14                                                   | 58.463,29                                          | 27,61 | KKASD      |
| 125 | Sulawesi Selatan    | Kab. Majene               | 125.986,57                                                   | 40.630,19                                          | 32,25 | KKASD      |
| 126 | Sulawesi Selatan    | Kab. Pangkep              | 158.648,66                                                   | 59.229,89                                          | 37,33 | KKAT       |
| 127 | Sulawesi Selatan    | Kab. Pinrang              | 165.612,59                                                   | 45.352,43                                          | 27,38 | KKASD      |
| 128 | Sulawesi Selatan    | Kab. Tana Toraja          | 198.412,13                                                   | 52.519,41                                          | 26,47 | KKASD      |
| 129 | Sulawesi Selatan    | Kab. Bantaeng             | 108.785,89                                                   | 41.027,42                                          | 37,71 | KKAT       |
| 130 | Sulawesi Selatan    | Kab. Barru                | 127.842,72                                                   | 47.804,73                                          | 37,39 | KKAT       |
| 131 | Sulawesi Selatan    | Kab. Bone                 | 246.297,45                                                   | 21.073,56                                          | 8,56  | KKASR      |
| 132 | Sulawesi Selatan    | Kab. Enrekang             | 129.457,73                                                   | 44.584,51                                          | 34,44 | KKASD      |
| 133 | Sulawesi Selatan    | Kab. Gowa                 | 217.986,40                                                   | 64.995,63                                          | 29,82 | KKASD      |
| 134 | Sulawesi Selatan    | Kab. Jeneponto            | 167.959,99                                                   | 43.120,95                                          | 25,67 | KKASD      |
| 135 | Sulawesi Selatan    | Kab. Luwu Utara           | 234.080,24                                                   | 80.546,29                                          | 34,41 | KKASD      |
| 136 | Sulawesi Selatan    | Kab. Maros                | 199.786,52                                                   | 69.320,45                                          | 34,70 | KKASD      |
| 137 | Sulawesi Selatan    | Kab. Selayar              | 114.922,77                                                   | 45.359,12                                          | 39,47 | KKAT       |
| 138 | Sulawesi Selatan    | Kab. Sinjai               | 129.118,96                                                   | 33.160,96                                          | 25,68 | KKASD      |
| 139 | Sulawesi Selatan    | Kab. Takalar              | 143.802,46                                                   | 27.917,32                                          | 19,41 | KKAR       |
| 140 | Nusa Tenggara Barat | Kab. Bima                 | 270.912,52                                                   | 57.099,71                                          | 21,08 | KKAR       |
| 141 | Nusa Tenggara Barat | Kab. Lombok Barat         | 232.637,86                                                   | 42.865,53                                          | 18,43 | KKAR       |
| 142 | Nusa Tenggara Barat | Kab. Dompu                | 150.356,54                                                   | 40.164,67                                          | 26,71 | KKASD      |
| 143 | Nusa Tenggara Barat | Kab. Lombok Timur         | 287.686,49                                                   | 84.980,34                                          | 29,54 | KKASD      |
| 144 | Nusa Tenggara Timur | Kab. Ende                 | 148.407,25                                                   | 25.203,88                                          | 16,98 | KKAR       |
| 145 | Nusa Tenggara Timur | Kab. Flores Timur         | 150.632,49                                                   | 48.098,83                                          | 31,93 | KKASD      |
| 146 | Nusa Tenggara Timur | Kab. Timur Tengah Selatan | 208.658,13                                                   | 75.786,79                                          | 36,32 | KKAT       |
| 147 | Nusa Tenggara Timur | Kab. Timur Tengah Utara   | 173.614,69                                                   | 63.535,51                                          | 36,60 | KKAT       |
| 148 | Nusa Tenggara Timur | Kab. Belu                 | 184.320,46                                                   | 52.209,12                                          | 28,33 | KKASD      |
| 149 | Nusa Tenggara Timur | Kab. Manggarai            | 225.890,05                                                   | 55.188,64                                          | 24,43 | KKASD      |
| 150 | Nusa Tenggara Timur | Kab. Ngada                | 159.173,07                                                   | 50.664,49                                          | 31,83 | KKASD      |
| 151 | Nusa Tenggara Timur | Kab. Sumba Barat          | 156.007,57                                                   | 52.921,39                                          | 33,92 | KKASD      |
| 152 | Irian Jaya Barat    | Kab. Fak-Fak              | 225.435,62                                                   | 68.747,97                                          | 30,50 | KKASD      |
| 153 | Irian Jaya Barat    | Kab. Manokwari            | 274.852,85                                                   | 122.924,93                                         | 44,72 | KKAST      |
| 154 | Irian Jaya Barat    | Kab. Sorong               | 345.403,89                                                   | 85.524,55                                          | 24,76 | KKASD      |
| 155 | Papua               | Kab. Jayawijaya           | 413.312,80                                                   | 177.463,27                                         | 42,94 | KKAT       |
| 156 | Papua               | Kab. Mimika               | 312.115,63                                                   | 132.348,90                                         | 42,40 | KKAT       |

**Keterangan :**

**KKA** : Kelembagaan - Keuangan Daerah - Rasio Anggaran Pembangunan/APBD

Huruf Setelah **KKA** - **ST** : Sangat Tinggi

**T** : Tinggi

**SD** : Sedang

**R** : Rendah

**SR** : Sangat Rendah

|            |       |       |
|------------|-------|-------|
| Rata-rata  | 29,62 |       |
| Stand. Dev | 13,64 |       |
|            |       |       |
| KKAST      | 43,25 |       |
| KKAT       | 36,43 | 43,25 |
| KKASD      | 22,80 | 36,43 |
| KKAR       | 22,80 | 15,98 |
| KKASR      | 15,98 |       |
| KKRSR      | 45,49 |       |

Lampiran 4.3.1.2.B. Indikator Rasio Anggaran Pembangunan Terhadap APBD

| No. | Propinsi            | Kota                  | Total Pengeluaran Rutin dan Pembangunan (tidak termasuk UKP) | Total Pengeluaran Pembangunan (tidak termasuk UKP) | Rasio | Intensitas |
|-----|---------------------|-----------------------|--------------------------------------------------------------|----------------------------------------------------|-------|------------|
| 1   | Sumatera Utara      | Kota Binjai           | 155.047,17                                                   | 54.467,01                                          | 35,13 | KKASD      |
| 2   | Sumatera Utara      | Kota Medan            | 663.506,57                                                   | 138.852,89                                         | 20,93 | KKAR       |
| 3   | Sumatera Utara      | Kota Pematang Siantar | 165.944,00                                                   | 45.643,52                                          | 27,51 | KKASD      |
| 4   | Sumatera Utara      | Kota Sibolga          | 106.126,78                                                   | 39.658,31                                          | 37,37 | KKAT       |
| 5   | Sumatera Utara      | Kota Tanjung Balai    | 162.727,11                                                   | 100.000,28                                         | 61,45 | KKAST      |
| 6   | Sumatera Utara      | Kota Tebing Tinggi    | 134.677,76                                                   | 45.247,23                                          | 33,60 | KKASD      |
| 7   | Sumatera Barat      | Kota Padang           | 338.909,25                                                   | 47.605,76                                          | 14,05 | KKASR      |
| 8   | Sumatera Barat      | Kota Sawahlunto       | 86.875,85                                                    | 23.506,73                                          | 27,06 | KKASD      |
| 9   | Riau                | Kota Batam            | 358.633,72                                                   | 189.246,32                                         | 52,77 | KKAST      |
| 10  | Riau                | Kota Pekanbaru        | 364.020,42                                                   | 115.505,77                                         | 31,73 | KKASD      |
| 11  | Riau                | Kota Dumai            | 258.900,45                                                   | 115.537,39                                         | 44,63 | KKAST      |
| 12  | Sumatera Selatan    | Kota Palembang        | 453.648,16                                                   | 100.792,36                                         | 22,22 | KKAR       |
| 13  | Bangka Belitung     | Kota Pangkal Pinang   | 110.051,46                                                   | 33.188,19                                          | 30,16 | KKASD      |
| 14  | Bengkulu            | Kota Bengkulu         | 146.214,40                                                   | 24.981,18                                          | 17,09 | KKAR       |
| 15  | Lampung             | Kota Bandar Lampung   | 279.253,89                                                   | 41.207,28                                          | 14,76 | KKASR      |
| 16  | Banten              | Kota Tangerang        | 378.476,21                                                   | 159.248,60                                         | 42,08 | KKAT       |
| 17  | Banten              | Kota Cilegon          | 165.339,07                                                   | 55.379,24                                          | 33,49 | KKASD      |
| 18  | DKI Jakarta         | Kota DKI Jakarta      | 9.345.516,87                                                 | 3.628.875,25                                       | 38,83 | KKAT       |
| 19  | Jawa Barat          | Kota Bandung          | 902.793,03                                                   | 226.727,89                                         | 25,11 | KKASD      |
| 20  | Jawa Barat          | Kota Bekasi           | 396.051,55                                                   | 161.113,10                                         | 40,68 | KKAT       |
| 21  | Jawa Barat          | Kota Bogor            | 244.511,39                                                   | 59.118,11                                          | 24,18 | KKASD      |
| 22  | Jawa Barat          | Kota Cirebon          | 187.703,43                                                   | 46.628,15                                          | 24,84 | KKASD      |
| 23  | Jawa Barat          | Kota Sukabumi         | 155.163,97                                                   | 42.885,90                                          | 27,64 | KKASD      |
| 24  | Jawa Tengah         | Kota Pekalongan       | 130.573,44                                                   | 47.682,73                                          | 36,52 | KKAT       |
| 25  | Jawa Tengah         | Kota Semarang         | 363.419,12                                                   | 296.240,45                                         | 81,51 | KKAST      |
| 26  | Jawa Tengah         | Kota Tegal            | 245.722,15                                                   | 103.622,12                                         | 42,17 | KKAT       |
| 27  | Jawa Tengah         | Kota Surakarta        | 247.785,50                                                   | 38.603,42                                          | 15,58 | KKASR      |
| 28  | DI. Yogyakarta      | Kota Yogyakarta       | 242.199,60                                                   | 23.845,76                                          | 9,85  | KKASR      |
| 29  | Jawa Timur          | Kota Kediri           | 147.529,42                                                   | 29.552,90                                          | 20,03 | KKAR       |
| 30  | Jawa Timur          | Kota Malang           | 257.105,55                                                   | 55.031,98                                          | 21,40 | KKAR       |
| 31  | Jawa Timur          | Kota Mojokerto        | 125.144,33                                                   | 38.627,25                                          | 30,87 | KKASD      |
| 32  | Jawa Timur          | Kota Probolinggo      | 146.346,62                                                   | 48.797,08                                          | 33,34 | KKASD      |
| 33  | Jawa Timur          | Kota Surabaya         | 931.794,48                                                   | 208.952,87                                         | 22,42 | KKAR       |
| 34  | Jawa Timur          | Kota Madiun           | 263.917,43                                                   | 146.125,88                                         | 55,37 | KKAST      |
| 35  | Bali                | Kota Denpasar         | 334.034,86                                                   | 102.186,13                                         | 30,59 | KKASD      |
| 36  | Kalimantan Timur    | Kota Balikpapan       | 422.969,07                                                   | 219.577,71                                         | 51,91 | KKAST      |
| 37  | Kalimantan Timur    | Kota Samarinda        | 550.129,11                                                   | 273.170,01                                         | 49,66 | KKAST      |
| 38  | Sulawesi Utara      | Kota Bitung           | 132.151,57                                                   | 42.550,00                                          | 32,20 | KKASD      |
| 39  | Sulawesi Utara      | Kota Manado           | 194.930,92                                                   | 31.530,00                                          | 16,17 | KKAR       |
| 40  | Gorontalo           | Kota Gorontalo        | 127.572,32                                                   | 37.290,10                                          | 29,23 | KKASD      |
| 41  | Sulawesi Tenggara   | Kota Kendari          | 145.761,85                                                   | 27.238,10                                          | 18,69 | KKAR       |
| 42  | Sulawesi Selatan    | Kota Pare-Pare        | 113.093,85                                                   | 31.134,18                                          | 27,53 | KKASD      |
| 43  | Nusa Tenggara Barat | Kota Mataram          | 156.858,79                                                   | 50.461,65                                          | 32,17 | KKASD      |
| 44  | Nusa Tenggara Timur | Kota Kupang           | 132.898,46                                                   | 19.645,00                                          | 14,78 | KKASR      |

**Keterangan :**

**KKA** : Kelembagaan - Keuangan Daerah - Rasio Anggaran Pembangunan/APBD

Huruf Setelah **KKA** - **ST** : Sangat Tinggi

**T** : Tinggi

**SD** : Sedang

**R** : Rendah

**SR** : Sangat Rendah

|            |       |       |
|------------|-------|-------|
| Rata-rata  | 29,62 |       |
| Stand. Dev | 13,64 |       |
|            |       |       |
| KKAST      | 43,25 |       |
| KKAT       | 36,43 | 43,25 |
| KKASD      | 22,80 | 36,43 |
| KKAR       | 22,80 | 15,98 |
| KKASR      | 15,98 |       |
| KKRSR      | 45,49 |       |



Lampiran 4.3.2. Hasil Klasifikasi Indikator Faktor Ekonomi Daerah

Lampiran 4.3.2.1. Variabel Potensi Ekonomi

Lampiran 4.3.2.1.1.A Indikator PDRB Perkapita

| No. | Propinsi         | Kabupaten                  | PDRB Perkapita |               | Intensitas |
|-----|------------------|----------------------------|----------------|---------------|------------|
|     |                  |                            | 1999           | 2000          |            |
| 1   | Sumatera Utara   | Kab. Asahan                | 7.049.808,85   | 8.773.138,32  | EPPST      |
| 2   | Sumatera Utara   | Kab. Dairi                 | 3.964.214,62   | 4.575.689,39  | EPPSD      |
| 3   | Sumatera Utara   | Kab. Deli Serdang          | 3.235.494,56   | 3.647.018,11  | EPPSD      |
| 4   | Sumatera Utara   | Kab. Langkat               | 4.561.009,95   | 5.214.906,27  | EPPT       |
| 5   | Sumatera Utara   | Kab. Simalungun            | 4.142.181,45   | 4.159.249,79  | EPPSD      |
| 6   | Sumatera Utara   | Kab. Tanah Karo            | 5.486.651,02   | 6.100.890,94  | EPPT       |
| 7   | Sumatera Utara   | Kab. Labuhan Batu          | 6.653.471,85   | 8.011.739,91  | EPPST      |
| 8   | Sumatera Utara   | Kab. Tapanuli Utara        | 3.402.431,17   | -             | EPPSD      |
| 9   | Sumatera Barat   | Kab. Pesisir Selatan       | 2.855.977,198  | 3.346.230,10  | EPPSD      |
| 10  | Sumatera Barat   | Kab. Sawah Lunto Sijunjung | 4.001.696,877  | 4.720.544,88  | EPPSD      |
| 11  | Sumatera Barat   | Kab. Pasaman               | 2.646.639,607  | 2.999.635,59  | EPPT       |
| 12  | Sumatera Barat   | Kab. Solok                 | 3.050.767,982  | 3.717.069,99  | EPPSD      |
| 13  | Riau             | Kab. Bengkalis 1)          | -              | 3.114.789,45  | EPPSD      |
| 14  | Riau             | Kab. Indragiri Hilir       | 3.836.636,15   | 4.243.380,74  | EPPSD      |
| 15  | Riau             | Kab. Kampar 1)             | -              | 2.883.150,59  | EPPT       |
| 16  | Riau             | Kab. Kuantan Singingi      | -              | 4.228.285,21  | EPPSD      |
| 17  | Riau             | Kab. Pelalawan             | -              | 4.469.009,15  | EPPSD      |
| 18  | Riau             | Kab. Rokan Hulu            | -              | 2.741.683,91  | EPPT       |
| 19  | Jambi            | Kab. Batanghari            | -              | 3.553.253,32  | EPPSD      |
| 20  | Jambi            | Kab. Bungo                 | -              | 3.143.385,10  | EPPSD      |
| 21  | Jambi            | Kab. Kerinci               | 2.803.148,089  | 3.125.261,82  | EPPSD      |
| 22  | Jambi            | Kab. Tanjung Jabung Timur  | -              | 6.900.723,76  | EPPST      |
| 23  | Jambi            | Kab. Tebo                  | -              | 2.132.411,17  | EPPT       |
| 24  | Sumatera Selatan | Kab. Muara Enim            | 8.375.040,85   | 12.063.770,91 | EPPST      |
| 25  | Sumatera Selatan | Kab. Musi Banyuasin        | 5.211.567,52   | 6.939.632,72  | EPPST      |
| 26  | Sumatera Selatan | Kab. Musi Rawas            | 3.471.870,84   | 3.946.251,07  | EPPSD      |
| 27  | Sumatera Selatan | Kab. Ogan Kemiling Ilir    | 2.774.513,70   | 2.987.774,77  | EPPT       |
| 28  | Sumatera Selatan | Kab. Lahat                 | 3.102.114,56   | 3.386.188,91  | EPPSD      |
| 29  | Bangka Belitung  | Kab. Bangka                | -              | 6.286.532,84  | EPPT       |
| 30  | Bangka Belitung  | Kab. Belitung              | -              | 5.754.538,21  | EPPT       |
| 31  | Bengkulu         | Kab. Bengkulu Selatan      | 1.735.015,08   | 1.615.909,23  | EPPSR      |
| 32  | Lampung          | Kab. Lampung Barat         | 2.597.816,80   | 2.838.991,61  | EPPT       |
| 33  | Lampung          | Kab. Lampung Selatan       | 3.054.640,29   | 2.984.281,51  | EPPT       |
| 34  | Lampung          | Kab. Lampung Timur         | -              | 3.417.039,71  | EPPSD      |
| 35  | Lampung          | Kab. Lampung Utara         | 1.789.617,54   | 2.842.809,28  | EPPT       |
| 36  | Jawa Barat       | Kab. Bandung               | 4.125.936,24   | 4.817.477,43  | EPPSD      |
| 37  | Lampung          | Kab. Way Kanan             | -              | 1.977.539,04  | EPPSR      |
| 38  | Banten           | Kab. Lebak                 | -              | 2.679.538,64  | EPPT       |
| 39  | Banten           | Kab. Serang                | 3.264.695,14   | 3.425.393,95  | EPPSD      |
| 40  | Banten           | Kab. Tangerang             | -              | 4.060.669,56  | EPPSD      |
| 41  | Jawa Barat       | Kab. Bekasi                | 16.346.027,79  | 18.422.454,88 | EPPST      |
| 42  | Jawa Barat       | Kab. Bogor                 | -              | 3.036.828,10  | EPPT       |
| 43  | Jawa Barat       | Kab. Ciamis                | 3.020.024,70   | 3.265.432,46  | EPPSD      |
| 44  | Jawa Barat       | Kab. Cianjur               | 2.507.632,04   | 2.782.721,75  | EPPT       |
| 45  | Jawa Barat       | Kab. Cirebon               | 1.956.436,45   | 2.175.816,26  | EPPT       |
| 46  | Jawa Barat       | Kab. Garut                 | 2.565.562,97   | 2.863.146,83  | EPPT       |
| 47  | Jawa Barat       | Kab. Indramayu             | 7.544.833,83   | 8.836.496,79  | EPPST      |
| 48  | Jawa Barat       | Kab. Karawang              | 3.442.665,80   | 4.143.817,99  | EPPSD      |
| 49  | Jawa Barat       | Kab. Kuningan              | 1.871.895,80   | 2.172.587,73  | EPPT       |
| 50  | Jawa Barat       | Kab. Purwakarta            | 5.704.981,12   | 6.374.628,18  | EPPST      |
| 51  | Jawa Barat       | Kab. Sukabumi              | 2.299.258,19   | 2.738.835,90  | EPPT       |
| 52  | Jawa Barat       | Kab. Sumedang              | 2.439.711,30   | 2.730.491,43  | EPPT       |
| 53  | Jawa Barat       | Kab. Tasikmalaya           | 2.481.410,90   | 2.705.074,48  | EPPT       |
| 54  | Jawa Barat       | Kab. Subang                | 3.916.236,02   | 3.511.485,40  | EPPSD      |
| 55  | Jawa Tengah      | Kab. Kendal                | 3.988.885,55   | 4.323.476,64  | EPPSD      |
| 56  | Jawa Tengah      | Kab. Magelang              | 2.230.489,88   | 2.544.710,61  | EPPT       |

| No. | Propinsi           | Kabupaten                | PDRB Perkapita |               | Intensitas |
|-----|--------------------|--------------------------|----------------|---------------|------------|
|     |                    |                          | 1999           | 2000          |            |
| 57  | Jawa Tengah        | Kab. Pekalongan          | 2.892.180,87   | 3.243.406,40  | EPPSD      |
| 58  | Jawa Tengah        | Kab. Pemalang            | 1.614.585,05   | 1.828.700,31  | EPPSR      |
| 59  | Jawa Tengah        | Kab. Sukoharjo           | 3.041.846,79   | 3.345.171,44  | EPPSD      |
| 60  | Jawa Tengah        | Kab. Tegal               | 1.393.848,83   | 1.520.767,04  | EPPSR      |
| 61  | Jawa Tengah        | Kab. Banyumas            | 1.601.776,66   | 1.837.228,79  | EPPSR      |
| 62  | Jawa Tengah        | Kab. Boyolali            | 2.588.093,37   | 2.872.779,98  | EPPR       |
| 63  | Jawa Tengah        | Kab. Cilacap 1)          | 8.365.732,99   | 9.397.528,86  | EPPST      |
| 64  | Jawa Tengah        | Kab. Jepara              | 2.589.588,25   | 2.922.786,98  | EPPR       |
| 65  | Jawa Tengah        | Kab. Karanganyar         | 3.026.210,28   | 3.285.867,87  | EPPSD      |
| 66  | Jawa Tengah        | Kab. Klaten              | 2.416.473,88   | 2.628.412,21  | EPPR       |
| 67  | Jawa Tengah        | Kab. Kudus               | 10.405.575,67  | 11.163.955,54 | EPPST      |
| 68  | Jawa Tengah        | Kab. Kebumen             | 1.628.218,04   | 1.801.778,35  | EPPSR      |
| 69  | DI. Yogyakarta     | Kab. Bantul              | 2.597.778,78   | 2.892.842,92  | EPPR       |
| 70  | DI. Yogyakarta     | Kab. Gunung Kidul        | 2.998.831,00   | 3.316.721,95  | EPPSD      |
| 71  | Jawa Timur         | Kab. Bangkalan           | 2.099.870,08   | 2.278.420,18  | EPPR       |
| 72  | Jawa Timur         | Kab. Banyuwangi          | 2.737.582,73   | 3.001.358,33  | EPPR       |
| 73  | Jawa Timur         | Kab. Blitar              | 2.139.838,29   | 2.336.666,79  | EPPR       |
| 74  | Jawa Timur         | Kab. Kediri              | 1.995.665,22   | 2.286.163,01  | EPPR       |
| 75  | Jawa Timur         | Kab. Magetan             | 2.337.814,54   | 2.534.185,32  | EPPR       |
| 76  | Jawa Timur         | Kab. Mojokerto           | 2.585.257,81   | 3.242.109,23  | EPPSD      |
| 77  | Jawa Timur         | Kab. Pamekasan           | 1.436.045,20   | 1.587.610,94  | EPPSR      |
| 78  | Jawa Timur         | Kab. Pasuruan            | 2.284.374,28   | 2.547.203,32  | EPPR       |
| 79  | Jawa Timur         | Kab. Sidoarjo            | 6.355.734,87   | 6.920.821,85  | EPPST      |
| 80  | Jawa Timur         | Kab. Bondowoso           | 1.860.494,84   | 1.726.980,24  | EPPSR      |
| 81  | Jawa Timur         | Kab. Gresik              | 8.469.500,29   | 9.390.959,15  | EPPST      |
| 82  | Jawa Timur         | Kab. Jember              | 2.128.210,45   | 2.385.703,27  | EPPR       |
| 83  | Jawa Timur         | Kab. Jombang             | 2.526.612,97   | 2.856.415,87  | EPPR       |
| 84  | Jawa Timur         | Kab. Lamongan            | 2.137.205,78   | 2.331.851,37  | EPPR       |
| 85  | Jawa Timur         | Kab. Ponorogo            | 1.810.168,51   | 2.012.849,84  | EPPSR      |
| 86  | Jawa Timur         | Kab. Tulungagung         | 3.177.752,31   | 3.254.677,15  | EPPSD      |
| 87  | Bali               | Kab. Badung              | 8.936.956,45   | 9.856.992,62  | EPPST      |
| 88  | Bali               | Kab. Bangli              | 3.589.047,32   | 3.934.904,67  | EPPSD      |
| 89  | Bali               | Kab. Buleleng            | 3.105.078,55   | 3.483.670,44  | EPPSD      |
| 90  | Bali               | Kab. Gianyar             | 4.985.924,85   | 5.575.472,14  | EPPT       |
| 91  | Bali               | Kab. Jembrana            | 4.306.098,26   | 4.744.383,28  | EPPSD      |
| 92  | Bali               | Kab. Tabanan             | 3.706.700,52   | 4.057.993,38  | EPPSD      |
| 93  | Bali               | Kab. Karangasem          | 2.829.819,67   | 3.092.249,11  | EPPSD      |
| 94  | Kalimantan Barat   | Kab. Kapuas Hulu         | 3.163.186,44   | 3.473.354,94  | EPPSD      |
| 95  | Kalimantan Barat   | Kab. Ketapang            | 3.059.823,87   | 3.244.509,81  | EPPSD      |
| 96  | Kalimantan Barat   | Kab. Pontianak           | -              | 6.267.958,95  | EPPT       |
| 97  | Kalimantan Barat   | Kab. Sambas              | -              | 3.823.182,19  | EPPSD      |
| 98  | Kalimantan Barat   | Kab. Sanggau             | 3.367.584,17   | 3.717.308,21  | EPPSD      |
| 99  | Kalimantan Tengah  | Kab. Barito Selatan      | 5.256.500,24   | 5.792.881,57  | EPPT       |
| 100 | Kalimantan Tengah  | Kab. Barito Utara        | 7.509.286,38   | 9.121.977,66  | EPPST      |
| 101 | Kalimantan Tengah  | Kab. Kapuas              | 3.569.751,14   | 3.983.510,44  | EPPSD      |
| 102 | Kalimantan Selatan | Kab. Hulu Sungai Selatan | 3.072.214,68   | 3.602.911,07  | EPPSD      |
| 103 | Kalimantan Selatan | Kab. Hulu Sungai Tengah  | 2.402.350,03   | 2.619.732,30  | EPPR       |
| 104 | Kalimantan Selatan | Kab. Hulu Sungai Utara   | 4.623.686,47   | 5.294.909,14  | EPPT       |
| 105 | Kalimantan Selatan | Kab. Tabalong            | 7.043.374,12   | 8.213.066,82  | EPPST      |
| 106 | Kalimantan Selatan | Kab. Tanah Laut          | 4.732.984,87   | 4.726.113,10  | EPPSD      |
| 107 | Kalimantan Selatan | Kab. Tapin               | 3.957.680,86   | 4.327.417,03  | EPPSD      |
| 108 | Kalimantan Timur   | Kab. Berau               | 16.329.999,54  | 18.695.196,84 | EPPST      |
| 109 | Kalimantan Timur   | Kab. Kutai               | -              | 42.964.897,30 | EPPST      |
| 110 | Kalimantan Timur   | Kab. Pasir               | 6.330.546,47   | 7.194.899,37  | EPPST      |
| 111 | Kalimantan Timur   | Kab. Bulungan            | -              | 6.578.534,64  | EPPST      |
| 112 | Kalimantan Timur   | Kab. Kutai Timur         | -              | 24.745.033,79 | EPPST      |

| No. | Propinsi            | Kabupaten                 | PDRB Perkapita |               | Intensitas |
|-----|---------------------|---------------------------|----------------|---------------|------------|
|     |                     |                           | 1999           | 2000          |            |
| 113 | Kalimantan Timur    | Kab. Nunukan              | -              | 4.640.802,39  | EPPSD      |
| 114 | Sulawesi Utara      | Kab. Minahasa             | 4.075.803,96   | 4.231.477,48  | EPPSD      |
| 115 | Sulawesi Utara      | Kab. Sangihe              | 2.672.360,09   | 3.061.258,72  | EPPR       |
| 116 | Gorontalo           | Kab. Gorontalo            | -              | 1.610.808,98  | EPPSR      |
| 117 | Sulawesi Tengah     | Kab. Banggai              | -              | 3.338.745,80  | EPPSD      |
| 118 | Sulawesi Tengah     | Kab. Toli-Toli            | -              | 5.696.246,97  | EPPT       |
| 119 | Sulawesi Tengah     | Kab. Donggala             | 22.457.529,92  | 24.735.973,81 | EPPST      |
| 120 | Sulawesi Tengah     | Kab. Morowali             | -              | 6.908.653,83  | EPPST      |
| 121 | Sulawesi Tengah     | Kab. Poso                 | -              | 3.922.586,17  | EPPSD      |
| 122 | Sulawesi Tenggara   | Kab. Buton                | 2.040.822,45   | 2.423.045,42  | EPPR       |
| 123 | Sulawesi Tenggara   | Kab. Kolaka               | 4.452.062,75   | 5.581.064,24  | EPPT       |
| 124 | Sulawesi Selatan    | Kab. Luwu                 | -              | 2.287.818,96  | EPPR       |
| 125 | Sulawesi Selatan    | Kab. Majene               | 2.862.530,91   | 3.005.076,31  | EPPR       |
| 126 | Sulawesi Selatan    | Kab. Pangkep              | 3.847.799,45   | 4.785.812,30  | EPPSD      |
| 127 | Sulawesi Selatan    | Kab. Pinrang              | 3.603.046,59   | 4.204.544,34  | EPPSD      |
| 128 | Sulawesi Selatan    | Kab. Tana Toraja          | 1.905.258,24   | 2.047.143,81  | EPPR       |
| 129 | Sulawesi Selatan    | Kab. Bantaeng             | 2.089.957,40   | 2.511.937,19  | EPPR       |
| 130 | Sulawesi Selatan    | Kab. Barru                | 2.312.872,62   | 2.505.995,90  | EPPR       |
| 131 | Sulawesi Selatan    | Kab. Bone                 | 2.909.507,79   | 3.051.300,42  | EPPR       |
| 132 | Sulawesi Selatan    | Kab. Enrekang             | 2.167.091,43   | 2.372.283,49  | EPPR       |
| 133 | Sulawesi Selatan    | Kab. Gowa                 | 2.020.791,32   | 2.237.540,54  | EPPR       |
| 134 | Sulawesi Selatan    | Kab. Jeneponto            | 1.466.757,74   | 1.857.490,40  | EPPSR      |
| 135 | Sulawesi Selatan    | Kab. Luwu Utara           | -              | 7.776.247,29  | EPPST      |
| 136 | Sulawesi Selatan    | Kab. Maros                | 3.017.614,99   | 3.294.484,12  | EPPSD      |
| 137 | Sulawesi Selatan    | Kab. Selayar              | 2.460.413,76   | 2.648.031,58  | EPPR       |
| 138 | Sulawesi Selatan    | Kab. Sinjai               | 2.241.541,53   | 2.603.480,83  | EPPR       |
| 139 | Sulawesi Selatan    | Kab. Takalar              | 2.022.361,88   | 2.359.097,76  | EPPR       |
| 140 | Nusa Tenggara Barat | Kab. Bima                 | 2.234.805,74   | 2.467.039,23  | EPPR       |
| 141 | Nusa Tenggara Barat | Kab. Lombok Barat         | 2.126.473,70   | 2.298.288,42  | EPPR       |
| 142 | Nusa Tenggara Barat | Kab. Dompu                | 5.257.632,66   | 5.927.726,34  | EPPT       |
| 143 | Nusa Tenggara Barat | Kab. Lombok Timur         | 15.911.699,15  | 17.278.686,66 | EPPST      |
| 144 | Nusa Tenggara Timur | Kab. Ende                 | 1.528.289      | 1.667.391,31  | EPPSR      |
| 145 | Nusa Tenggara Timur | Kab. Flores Timur         | -              | 1.604.329,06  | EPPSR      |
| 146 | Nusa Tenggara Timur | Kab. Timur Tengah Selatan | 1.099.203      | 1.200.102,11  | EPPSR      |
| 147 | Nusa Tenggara Timur | Kab. Timur Tengah Utara   | 1.200.406      | 1.308.034,46  | EPPSR      |
| 148 | Nusa Tenggara Timur | Kab. Belu                 | 1.302.829      | 1.408.847,94  | EPPSR      |
| 149 | Nusa Tenggara Timur | Kab. Manggarai            | 1.094.078      | 1.223.977,21  | EPPSR      |
| 150 | Nusa Tenggara Timur | Kab. Ngada                | 1.421.483      | 1.596.788,07  | EPPSR      |
| 151 | Nusa Tenggara Timur | Kab. Sumba Barat          | 1.021.873      | 1.078.527,06  | EPPSR      |
| 152 | Irian Jaya Barat    | Kab. Fak-Fak              | 1.108.554,67   | 1.323.550,46  | EPPSR      |
| 153 | Irian Jaya Barat    | Kab. Manokwari            | 6.629.012,74   | 7.876.465,53  | EPPST      |
| 154 | Irian Jaya Barat    | Kab. Sorong               | 6.448.781,09   | 8.217.540,64  | EPPST      |
| 155 | Papua               | Kab. Jayawijaya           | 1.335.189,28   | 1.592.730,33  | EPPSR      |
| 156 | Papua               | Kab. Mimika               | -              | 2.050.000,00  | EPPR       |

Catatan/Note :1) Tidak termasuk Minyak Bumi dan Gas/Excluding Oil and Gas

**Keterangan :**

**EPP** : Ekonomi Daerah - Potensi Ekonomi - PDRB Perkapita

Dibelakang **EPP** - **ST** : Sangat Tinggi

**T** : Tinggi

**SD** : Sedang

**R** : Rendah

**SR** : Sangat Rendah

|            |             |             |
|------------|-------------|-------------|
| Rata-rata  | 4.125.138,8 |             |
| Stand. Dev | 2.108.158,9 |             |
| Median     | 3.473.354,9 |             |
| EPPST      | 6.233.297,7 |             |
| EPPT       | 5.179.218,2 | 6.233.297,7 |
| EPPSD      | 3.071.059,4 | 5.179.218,2 |
| EPPR       | 3.071.059,4 | 2.016.979,9 |
| EPPSR      | 2.016.979,9 |             |

Lampiran 4.3.2.1.1.B Indikator PDRB Perkapita

| No. | Propinsi            | Kabupaten             | PDRB Perkapita |               | Intensitas |
|-----|---------------------|-----------------------|----------------|---------------|------------|
|     |                     |                       | 1999           | 2000          |            |
| 1   | Sumatera Utara      | Kota Binjai           | 3.167.328,50   | 3.898.328,27  | EPPSD      |
| 2   | Sumatera Utara      | Kota Medan            | 5.245.532,45   | 6.243.836,32  | EPPT       |
| 3   | Sumatera Utara      | Kota Pematang Siantar | 6.444.669,56   | 7.015.872,41  | EPPST      |
| 4   | Sumatera Utara      | Kota Sibolga          | 5.096.207,83   | 5.880.761,33  | EPPT       |
| 5   | Sumatera Utara      | Kota Tanjung Balai    | 6.313.320,44   | 6.292.784,15  | EPPT       |
| 6   | Sumatera Utara      | Kota Tebing Tinggi    | 4.837.854,55   | 5.831.603,63  | EPPT       |
| 7   | Sumatera Barat      | Kota Padang           | 8.170.343,039  | 9.944.962,43  | EPPST      |
| 8   | Sumatera Barat      | Kota Sawahlunto       | 8.499.590,944  | 9.417.793,50  | EPPST      |
| 9   | Riau                | Kota Batam            | 8.096.190,932  | 15.026.326,44 | EPPST      |
| 10  | Riau                | Kota Pekanbaru        | 3.634.946,245  | 5.470.006,85  | EPPT       |
| 11  | Riau                | Kota Dumai            | -              | 3.858.259,06  | EPPSD      |
| 12  | Sumatera Selatan    | Kota Palembang        | 5.423.745,05   | 6.536.403,34  | EPPST      |
| 13  | Bangka Belitung     | Kota Pangkal Pinang   | -              | 4.713.491,17  | EPPSD      |
| 14  | Bengkulu            | Kota Bengkulu         | 3.461.501,83   | 3.920.043,75  | EPPSD      |
| 15  | Lampung             | Kota Bandar Lampung   | 5.231.505,19   | 6.491.944,12  | EPPST      |
| 16  | Banten              | Kota Tangerang        | -              | 10.903.584,07 | EPPST      |
| 17  | Banten              | Kota Cilegon          | -              | 9.374.307,00  | EPPST      |
| 18  | DKI Jakarta         | Kota DKI Jakarta      | 19.767.326,10  | 22.613.756,07 | EPPST      |
| 19  | Jawa Barat          | Kota Bandung          | 6.228.926,06   | 6.733.921,91  | EPPST      |
| 20  | Jawa Barat          | Kota Bekasi           | 4.785.493,21   | 5.414.307,81  | EPPT       |
| 21  | Jawa Barat          | Kota Bogor            | 3.350.477,81   | 3.593.391,38  | EPPSD      |
| 22  | Jawa Barat          | Kota Cirebon          | 12.811.605,13  | 13.916.151,62 | EPPST      |
| 23  | Jawa Barat          | Kota Sukabumi         | 3.710.482,93   | 4.113.020,38  | EPPSD      |
| 24  | Jawa Tengah         | Kota Pekalongan       | 2.774.684,48   | 3.027.990,69  | EPPR       |
| 25  | Jawa Tengah         | Kota Semarang         | 7.782.800,78   | 8.805.002,74  | EPPST      |
| 26  | Jawa Tengah         | Kota Tegal            | 2.018.852,77   | 2.188.225,37  | EPPR       |
| 27  | Jawa Tengah         | Kota Surakarta        | 4.785.512,89   | 5.531.956,92  | EPPT       |
| 28  | DI. Yogyakarta      | Kota Yogyakarta       | 7.189.956,04   | 8.024.751,01  | EPPST      |
| 29  | Jawa Timur          | Kota Kediri           | 41.879.290,94  | 48.922.514,31 | EPPST      |
| 30  | Jawa Timur          | Kota Malang           | 9.455.943,42   | 7.914.313,40  | EPPST      |
| 31  | Jawa Timur          | Kota Mojokerto        | 2.863.738,82   | 4.781.770,15  | EPPSD      |
| 32  | Jawa Timur          | Kota Probolinggo      | 4.919.478,85   | 5.194.295,90  | EPPT       |
| 33  | Jawa Timur          | Kota Surabaya         | 11.471.674,78  | 14.031.725,12 | EPPST      |
| 34  | Jawa Timur          | Kota Madiun           | 3.531.933,51   | 3.950.994,58  | EPPSD      |
| 35  | Bali                | Kota Denpasar         | 5.925.999,54   | 6.500.274,69  | EPPST      |
| 36  | Kalimantan Timur    | Kota Balikpapan       | 19.566.322,62  | 21.017.581,11 | EPPST      |
| 37  | Kalimantan Timur    | Kota Samarinda        | 9.964.508,83   | 11.136.830,62 | EPPST      |
| 38  | Sulawesi Utara      | Kota Bitung           | 5.513.131,09   | 6.724.625,29  | EPPST      |
| 39  | Sulawesi Utara      | Kota Manado           | 4.571.798,27   | 5.021.300,97  | EPPSD      |
| 40  | Gorontalo           | Kota Gorontalo        | -              | 2.278.060,50  | EPPR       |
| 41  | Sulawesi Tenggara   | Kota Kendari          | 4.540.788,83   | 5.380.348,70  | EPPT       |
| 42  | Sulawesi Selatan    | Kota Pare-Pare        | 2.792.857,11   | 3.691.850,95  | EPPSD      |
| 43  | Nusa Tenggara Barat | Kota Mataram          | 8.704.162,59   | 9.635.054,01  | EPPST      |
| 44  | Nusa Tenggara Timur | Kota Kupang           | 2.366.207      | 2.590.793,25  | EPPR       |

Catatan/Note :1) Tidak termasuk Minyak Bumi dan Gas/Excluding Oil and Gas

**Keterangan :**

**EPP** : Ekonomi Daerah - Potensi Ekonomi - PDRB Perkapita

Dibelakang **EPP** - **ST** : Sangat Tinggi

**T** : Tinggi

**SD** : Sedang

**R** : Rendah

**SR** : Sangat Rendah

|            |             |             |
|------------|-------------|-------------|
| Rata-rata  | 4.125.138,8 |             |
| Stand. Dev | 2.108.158,9 |             |
| Median     | 3.473.354,9 |             |
| EPPST      | 6.233.297,7 |             |
| EPPT       | 5.179.218,2 | 6.233.297,7 |
| EPPSD      | 3.071.059,4 | 5.179.218,2 |
| EPPR       | 3.071.059,4 | 2.016.979,9 |
| EPPSR      | 2.016.979,9 |             |

Lampiran 4.3.2.1.2.A Indikator Pertumbuhan PDRB

| Tahun |          |                            | Growth 1996  |             | Growth 1997  |             | Growth 1998  |             | Growth 1999  |             | Growth 2000  |             | Growth 2001  |             | Rata-Rata 1996 s/d 2001 |             | Intensitas   |             |
|-------|----------|----------------------------|--------------|-------------|--------------|-------------|--------------|-------------|--------------|-------------|--------------|-------------|--------------|-------------|-------------------------|-------------|--------------|-------------|
| No.   | Propinsi | Kabupaten                  | Dengan Migas | Tanpa Migas | Dengan Migas            | Tanpa Migas | Dengan Migas | Tanpa Migas |
| 1     | SUMUT    | Kab. Asahan                | 10,29        | 10,29       | 8,81         | 8,81        | 1,05         | 1,05        | 5,29         | 5,29        | 6,14         | 6,14        | 5,08         | 5,08        | 6,11                    | 6,11        | EPGST        | EPGST       |
| 2     | SUMUT    | Kab. Dairi                 | 10,85        | 10,85       | 6,61         | 6,61        | 2,45         | 2,45        | 0,30         | 0,30        | 7,58         | 7,58        | 5,47         | 5,47        | 5,54                    | 5,54        | EPGT         | EPGST       |
| 3     | SUMUT    | Kab. Deli Serdang          | 6,55         | 6,55        | 9,49         | 9,49        | (8,90)       | (8,90)      | 3,98         | 3,98        | 5,29         | 5,29        | 3,84         | 3,84        | 3,38                    | 3,38        | EPGSD        | EPGSD       |
| 4     | SUMUT    | Kab. Langkat               | 7,13         | 7,59        | (7,31)       | 4,75        | (1,22)       | 0,17        | 0,11         | 1,46        | 2,31         | 3,32        | 1,27         | 3,14        | 0,38                    | 3,41        | EPGSR        | EPGSD       |
| 5     | SUMUT    | Kab. Simalungun            | 6,52         | 6,52        | 4,90         | 4,90        | (2,76)       | (2,76)      | 4,85         | 4,85        | 3,88         | 3,88        | 4,74         | 4,74        | 3,69                    | 3,69        | EPGSD        | EPGSD       |
| 6     | SUMUT    | Kab. Tanah Karo            | 9,50         | 9,50        | 7,55         | 7,55        | 0,72         | 0,72        | 5,60         | 5,60        | 5,46         | 5,46        | 4,01         | 4,01        | 5,47                    | 5,47        | EPGT         | EPGST       |
| 7     | SUMUT    | Kab. Labuhan Batu          | 12,28        | 12,28       | 9,96         | 9,96        | 1,20         | 1,20        | 4,94         | 4,94        | 6,00         | 6,00        | 5,12         | 5,12        | 6,58                    | 6,58        | EPGST        | EPGST       |
| 8     | SUMUT    | Kab. Tapanuli Utara        | (42,73)      | (42,73)     | 5,80         | 5,80        | (5,64)       | (5,64)      | 2,43         | 2,43        | 3,62         | 3,62        | 4,33         | 4,33        | (5,36)                  | (5,36)      | EPGSR        | EPGSR       |
| 9     | SUMBAR   | Kab. Pesisir Selatan       | 7,12         | 7,12        | 4,23         | 4,23        | (4,81)       | (4,81)      | 1,23         | 1,23        | 2,30         | 2,30        | 3,26         | 3,26        | 2,22                    | 2,22        | EPGSD        | EPGR        |
| 10    | SUMBAR   | Kab. Sawah Lunto Sijunjung | 7,52         | 7,52        | 4,82         | 4,82        | (3,38)       | (3,38)      | 1,31         | 1,31        | 3,66         | 3,66        | 3,51         | 3,51        | 2,91                    | 2,91        | EPGSD        | EPGSD       |
| 11    | SUMBAR   | Kab. Pasaman               | 7,29         | 7,29        | 4,28         | 4,28        | (3,19)       | (3,19)      | 1,50         | 1,50        | 3,03         | 3,03        | 3,43         | 3,43        | 2,72                    | 2,72        | EPGSD        | EPGSD       |
| 12    | SUMBAR   | Kab. Solok                 | 7,80         | 7,80        | 4,83         | 4,83        | (3,74)       | (3,74)      | 1,52         | 1,52        | 2,43         | 2,43        | 3,46         | 3,46        | 2,72                    | 2,72        | EPGSD        | EPGSD       |
| 13    | RIAU     | Kab. Bengkalis             | (6,99)       | 7,92        | 0,96         | 5,07        | 18,70        | 1,75        | 3,00         | 4,06        | -94,08       | -64,23      | 4,70         | 4,70        | (12,29)                 | (6,79)      | EPGSR        | EPGSR       |
| 14    | RIAU     | Kab. Indragiri Hilir       | 7,28         | 7,28        | 5,43         | 5,43        | 0,19         | 0,19        | 4,58         | 4,58        | 2,89         | 2,89        | 4,16         | 4,16        | 4,09                    | 4,09        | EPGSD        | EPGSD       |
| 15    | RIAU     | Kab. Kampar                | 4,50         | 7,68        | 1,99         | 6,17        | (34,98)      | (2,05)      | 3,22         | 3,60        | -85,35       | -77,63      | (19,59)      | (27,84)     | (21,70)                 | (15,01)     | EPGSR        | EPGSR       |
| 16    | RIAU     | Kab. Kuantan Singingi      | -            | -           | -            | -           | -            | -           | -            | -           | -            | 0,00        | 5,43         | 5,43        | 5,43                    | 5,43        | EPGT         | EPGST       |
| 17    | RIAU     | Kab. Pelalawan             | -            | -           | -            | -           | -            | -           | -            | -           | 0,00         | 0,00        | 6,18         | 6,18        | 6,18                    | 6,18        | EPGST        | EPGST       |
| 18    | RIAU     | Kab. Rokan Hulu            | -            | -           | -            | -           | -            | -           | -            | -           | 0,00         | 0,00        | 6,55         | 6,55        | 6,55                    | 6,55        | EPGST        | EPGST       |
| 19    | JAMBI    | Kab. Batanghari            | 9,08         | 7,96        | 4,27         | 4,30        | (6,44)       | (5,97)      | 1,85         | -           | -47,84       | -47,78      | 4,24         | 5,40        | (5,81)                  | (7,22)      | EPGSR        | EPGSR       |
| 20    | JAMBI    | Kab. Bungo                 | -            | -           | -            | -           | -            | -           | -            | -           | 0,00         | 0,00        | 4,08         | 4,08        | 4,08                    | 4,08        | EPGSD        | EPGSD       |
| 21    | JAMBI    | Kab. Kerinci               | 8,20         | 8,20        | 3,02         | 3,02        | (5,39)       | (5,39)      | 3,03         | 3,03        | 3,23         | 3,23        | 3,79         | 3,79        | 2,65                    | 2,65        | EPGSD        | EPGSD       |
| 22    | JAMBI    | Kab. Tanjung Jabung Timur  | -            | -           | -            | -           | -            | -           | -            | -           | 0,00         | 0,00        | 6,65         | 4,39        | 6,65                    | 4,39        | EPGST        | EPGT        |
| 23    | JAMBI    | Kab. Tebo                  | -            | -           | -            | -           | -            | -           | -            | -           | 0,00         | 0,00        | 3,17         | 3,17        | 3,17                    | 3,17        | EPGSD        | EPGSD       |
| 24    | SUMSEL   | Kab. Muara Enim            | 8,21         | 10,68       | 2,87         | 4,67        | (0,95)       | (2,28)      | 3,19         | 2,82        | -4,31        | -13,34      | 1,72         | 2,82        | 1,79                    | 0,89        | EPGR         | EPGSR       |
| 25    | SUMSEL   | Kab. Musi Banyuasin        | 7,27         | 8,71        | 1,76         | 3,96        | (2,55)       | (6,56)      | 3,91         | 1,84        | -54,43       | -57,34      | 3,19         | 2,93        | (6,81)                  | (7,74)      | EPGSR        | EPGSR       |
| 26    | SUMSEL   | Kab. Musi Rawas            | 7,87         | 8,95        | 7,60         | 10,06       | (6,60)       | (9,53)      | 2,86         | 2,88        | -22,96       | -30,19      | 4,78         | 5,06        | (1,08)                  | (2,13)      | EPGSR        | EPGSR       |
| 27    | SUMSEL   | Kab. Ogan Kemiling Ilir    | 10,10        | 10,10       | 5,08         | 5,08        | (2,36)       | (2,36)      | (0,40)       | (0,40)      | 3,38         | 3,38        | 4,13         | 3,90        | 3,32                    | 3,28        | EPGSD        | EPGSD       |

| Tahun |          |                       | Growth 1996  |             | Growth 1997  |             | Growth 1998  |             | Growth 1999  |             | Growth 2000  |             | Growth 2001  |             | Rata-Rata 1996 s/d 2001 |             | Intensitas   |             |
|-------|----------|-----------------------|--------------|-------------|--------------|-------------|--------------|-------------|--------------|-------------|--------------|-------------|--------------|-------------|-------------------------|-------------|--------------|-------------|
| No.   | Propinsi | Kabupaten             | Dengan Migas | Tanpa Migas | Dengan Migas            | Tanpa Migas | Dengan Migas | Tanpa Migas |
| 28    | SUMSEL   | Kab. Lahat            | 7,27         | 7,27        | 2,30         | 2,30        | (1,20)       | (1,20)      | 1,65         | 1,65        | -22,40       | -22,40      | 4,42         | 4,42        | (1,33)                  | (1,33)      | EPGSR        | EPGSR       |
| 29    | BABEL    | Kab. Bangka           | 12,56        | 12,56       | 7,05         | 7,05        | (5,55)       | (5,55)      | 0,60         | 0,60        | 4,39         | 4,39        | 4,84         | 4,84        | 3,98                    | 3,98        | EPGSD        | EPGSD       |
| 30    | BABEL    | Kab. Belitung         | 7,49         | 7,49        | 3,81         | 3,81        | (3,92)       | (3,92)      | 1,30         | 1,30        | 5,52         | 5,52        | 6,23         | 6,23        | 3,40                    | 3,40        | EPGSD        | EPGSD       |
| 31    | BENGKULU | Kab. Bengkulu Selatan | 3,05         | 3,05        | 2,20         | 2,20        | (2,19)       | (2,19)      | 1,63         | 1,63        | 4,30         | 4,30        | 3,97         | 3,97        | 2,16                    | 2,16        | EPGR         | EPGR        |
| 32    | LAMPUNG  | Kab. Lampung Barat    | 9,24         | 9,24        | (1,49)       | (1,49)      | 4,26         | 4,26        | 6,95         | 6,95        | 5,56         | 5,56        | 3,35         | 3,35        | 4,64                    | 4,64        | EPGSD        | EPGT        |
| 33    | LAMPUNG  | Kab. Lampung Selatan  | 5,52         | 5,52        | 2,05         | 2,05        | (7,40)       | (7,40)      | 3,41         | 3,41        | 3,84         | 3,84        | 3,63         | 3,63        | 1,84                    | 1,84        | EPGR         | EPGR        |
| 34    | LAMPUNG  | Kab. Lampung Timur    | -            | -           | -            | -           | -            | -           | 2,75         | 2,75        | 29,02        | 18,62       | 3,43         | 3,73        | 11,73                   | 8,37        | EPGST        | EPGST       |
| 35    | LAMPUNG  | Kab. Lampung Utara    | 6,23         | 6,23        | 2,14         | 2,14        | (41,55)      | (41,55)     | 0,12         | 0,12        | 6,00         | 6,00        | 3,36         | 3,36        | (3,95)                  | (3,95)      | EPGSR        | EPGSR       |
| 36    | JABAR    | Kab. Bandung          | 10,53        | 10,53       | 4,93         | 4,93        | (19,57)      | (19,57)     | 2,97         | 2,97        | 5,25         | 5,28        | 4,94         | 4,93        | 1,51                    | 1,51        | EPGR         | EPGSR       |
| 37    | LAMPUNG  | Kab. Way Kanan        | -            | -           | -            | -           | -            | -           | 1,89         | 1,89        | -7,84        | -7,84       | 3,74         | 3,74        | (0,73)                  | (0,73)      | EPGSR        | EPGSR       |
| 38    | BANTEN   | Kab. Lebak            | 8,88         | 8,88        | 2,29         | 2,29        | (9,90)       | (9,90)      | 2,54         | 2,54        | 10,73        | 10,73       | 4,82         | 4,82        | 3,23                    | 3,23        | EPGSD        | EPGSD       |
| 39    | BANTEN   | Kab. Serang           | 8,79         | 8,79        | 4,32         | 4,32        | (14,42)      | (14,42)     | 0,80         | 0,80        | -47,15       | -47,15      | 3,10         | 3,10        | (7,43)                  | (7,43)      | EPGSR        | EPGSR       |
| 40    | BANTEN   | Kab. Tangerang        | 10,65        | 10,65       | 5,95         | 5,95        | (9,26)       | (9,26)      | 2,11         | 2,11        | 4,39         | 4,39        | 5,09         | 5,09        | 3,16                    | 3,16        | EPGSD        | EPGSD       |
| 41    | JABAR    | Kab. Bekasi           | 5,07         | 5,07        | 6,93         | 6,93        | (21,36)      | (21,36)     | 1,76         | 1,76        | 68,86        | 68,86       | 4,16         | 4,13        | 10,90                   | 10,90       | EPGST        | EPGST       |
| 42    | JABAR    | Kab. Bogor            | 11,70        | 11,70       | 4,77         | 4,77        | (20,72)      | (20,72)     | 1,59         | 1,59        | -21,07       | -21,07      | 3,61         | 3,61        | (3,35)                  | (3,35)      | EPGSR        | EPGSR       |
| 43    | JABAR    | Kab. Ciamis           | 6,99         | 6,99        | 3,67         | 3,67        | (6,55)       | (6,55)      | 1,98         | 1,98        | 3,40         | 3,40        | 3,60         | 3,60        | 2,18                    | 2,18        | EPGR         | EPGR        |
| 44    | JABAR    | Kab. Cianjur          | 6,79         | 6,79        | 3,69         | 3,69        | (8,83)       | (8,83)      | 2,37         | 2,37        | 2,65         | 2,65        | 3,49         | 3,49        | 1,69                    | 1,69        | EPGR         | EPGR        |
| 45    | JABAR    | Kab. Cirebon          | 7,40         | 7,40        | 3,37         | 3,37        | (20,77)      | (20,77)     | 3,61         | 3,61        | 5,05         | 5,05        | 4,88         | 4,88        | 0,59                    | 0,59        | EPGSR        | EPGSR       |
| 46    | JABAR    | Kab. Garut            | 6,81         | 6,81        | 3,03         | 3,03        | (11,64)      | (11,64)     | 2,52         | 2,52        | 3,89         | 3,89        | 3,42         | 3,42        | 1,34                    | 1,34        | EPGR         | EPGSR       |
| 47    | JABAR    | Kab. Indramayu        | 31,35        | 6,95        | (6,65)       | 1,94        | (5,43)       | (10,49)     | (9,79)       | -           | -0,53        | 58,57       | 0,68         | 0,03        | 1,60                    | 11,40       | EPGR         | EPGST       |
| 48    | JABAR    | Kab. Karawang         | 9,11         | 9,11        | 4,52         | 4,52        | (19,79)      | (19,79)     | 5,62         | 5,62        | 12,76        | 12,76       | 10,84        | 7,13        | 3,84                    | 3,23        | EPGSD        | EPGSD       |
| 49    | JABAR    | Kab. Kuningan         | 7,01         | 7,01        | 3,46         | 3,46        | (5,66)       | (5,66)      | 1,27         | 1,27        | 2,80         | 2,80        | 3,20         | 3,20        | 2,01                    | 2,01        | EPGR         | EPGR        |
| 50    | JABAR    | Kab. Purwakarta       | 7,70         | 7,70        | 2,09         | 2,09        | (11,69)      | (11,69)     | 1,98         | 1,98        | 116,56       | 116,56      | 3,64         | 3,64        | 20,05                   | 20,05       | EPGST        | EPGST       |
| 51    | JABAR    | Kab. Sukabumi         | 8,67         | 8,67        | 3,20         | 3,20        | (10,82)      | (10,82)     | 1,64         | 1,64        | 12,49        | 12,51       | 6,41         | 6,44        | 3,60                    | 3,61        | EPGSD        | EPGSD       |
| 52    | JABAR    | Kab. Sumedang         | 7,52         | 7,52        | 2,88         | 2,88        | (11,79)      | (11,79)     | 2,39         | 2,39        | 3,90         | 3,90        | 3,32         | 3,32        | 1,37                    | 1,37        | EPGR         | EPGSR       |
| 53    | JABAR    | Kab. Tasikmalaya      | 7,64         | 7,64        | 3,62         | 3,62        | (13,21)      | (13,21)     | 2,27         | 2,27        | 11,38        | 11,38       | 3,37         | 3,37        | 2,51                    | 2,51        | EPGSD        | EPGR        |
| 54    | JABAR    | Kab. Subang           | 7,39         | 7,39        | 3,28         | 3,28        | (7,17)       | (7,17)      | 2,28         | 2,28        | 9,74         | 4,11        | 3,90         | 4,47        | 3,24                    | 2,39        | EPGSD        | EPGR        |
| 55    | JATENG   | Kab. Kendal           | 6,40         | 6,40        | 4,32         | 4,32        | (9,30)       | (9,30)      | 2,17         | 2,17        | 2,00         | 2,00        | 2,86         | 2,86        | 1,41                    | 1,41        | EPGR         | EPGSR       |

| Tahun |           |                   | Growth 1996  |             | Growth 1997  |             | Growth 1998  |             | Growth 1999  |             | Growth 2000  |             | Growth 2001  |             | Rata-Rata 1996 s/d 2001 |             | Intensitas   |             |
|-------|-----------|-------------------|--------------|-------------|--------------|-------------|--------------|-------------|--------------|-------------|--------------|-------------|--------------|-------------|-------------------------|-------------|--------------|-------------|
| No.   | Propinsi  | Kabupaten         | Dengan Migas | Tanpa Migas | Dengan Migas            | Tanpa Migas | Dengan Migas | Tanpa Migas |
| 56    | JATENG    | Kab. Magelang     | 6,53         | 6,53        | 1,17         | 1,17        | (3,14)       | (3,14)      | 1,64         | 1,64        | 3,50         | 3,50        | 3,91         | 3,91        | 2,27                    | 2,27        | EPGSD        | EPGR        |
| 57    | JATENG    | Kab. Pekalongan   | 6,84         | 6,84        | 3,88         | 3,88        | (8,66)       | (8,66)      | 3,51         | 3,51        | 2,52         | 2,52        | 4,32         | 4,32        | 2,07                    | 2,07        | EPGR         | EPGR        |
| 58    | JATENG    | Kab. Pemalang     | 6,98         | 6,98        | 4,74         | 4,74        | (1,63)       | (1,63)      | 1,59         | 1,59        | 3,71         | 3,71        | 3,24         | 3,24        | 3,10                    | 3,10        | EPGSD        | EPGSD       |
| 59    | JATENG    | Kab. Sukoharjo    | 9,50         | 9,50        | 2,78         | 2,78        | (11,23)      | (11,23)     | 1,25         | 1,25        | 3,52         | 3,52        | 4,05         | 4,05        | 1,65                    | 1,65        | EPGR         | EPGSR       |
| 60    | JATENG    | Kab. Tegal        | 6,54         | 6,54        | 5,45         | 5,45        | (9,02)       | (9,02)      | 2,53         | 2,53        | 4,90         | 4,90        | 4,65         | 4,65        | 2,51                    | 2,51        | EPGSD        | EPGR        |
| 61    | JATENG    | Kab. Banyumas     | 4,63         | 4,63        | 3,61         | 3,61        | (6,80)       | (6,80)      | 0,53         | 0,53        | 4,03         | 4,03        | 1,13         | 1,13        | 1,19                    | 1,19        | EPGR         | EPGSR       |
| 62    | JATENG    | Kab. Boyolali     | 6,55         | 6,55        | 2,02         | 2,02        | (9,51)       | (9,51)      | 1,18         | 1,18        | 2,06         | 2,06        | 3,63         | 3,63        | 0,99                    | 0,99        | EPGR         | EPGSR       |
| 63    | JATENG    | Kab. Cilacap      | 12,30        | 22,95       | 2,13         | 2,91        | 14,79        | 9,42        | 26,59        | -           | -23,84       | 6,92        | 4,98         | 4,98        | 6,16                    | 9,43        | EPGST        | EPGST       |
| 64    | JATENG    | Kab. Jepara       | 7,31         | 7,31        | 4,31         | 4,31        | 0,03         | 0,03        | 0,65         | 0,65        | 4,63         | 4,63        | 4,92         | 4,92        | 3,64                    | 3,64        | EPGSD        | EPGSD       |
| 65    | JATENG    | Kab. Karanganyar  | 7,97         | 7,97        | 3,77         | 3,77        | (11,29)      | (11,29)     | 2,48         | 2,48        | 4,51         | 4,51        | 1,42         | 1,42        | 1,48                    | 1,48        | EPGR         | EPGSR       |
| 66    | JATENG    | Kab. Klaten       | 7,12         | 7,12        | 2,68         | 2,68        | (11,35)      | (11,35)     | 0,49         | 0,49        | 3,98         | 3,98        | 4,02         | 4,02        | 1,16                    | 1,16        | EPGR         | EPGSR       |
| 67    | JATENG    | Kab. Kudus        | 7,57         | 7,57        | (0,37)       | (0,37)      | (11,79)      | (11,79)     | 0,79         | 0,79        | 1,89         | 1,89        | 3,18         | 3,18        | 0,21                    | 0,21        | EPGSR        | EPGSR       |
| 68    | JATENG    | Kab. Kebumen      | 6,23         | 6,23        | 2,75         | 2,75        | (13,03)      | (13,03)     | 3,62         | 3,62        | 0,31         | 0,31        | 1,78         | 1,78        | 0,28                    | 0,28        | EPGSR        | EPGSR       |
| 69    | D I YOGYA | Kab. Bantul       | 6,74         | 6,74        | 3,02         | 3,02        | (9,42)       | (9,42)      | 1,36         | 1,36        | 3,22         | 3,22        | 3,10         | 3,10        | 1,34                    | 1,34        | EPGR         | EPGSR       |
| 70    | DI. YOGYA | Kab. Gunung Kidul | 7,15         | 7,15        | 3,88         | 3,88        | (7,17)       | (7,17)      | 1,57         | 1,57        | 13,32        | 13,32       | 2,19         | 2,19        | 3,49                    | 3,49        | EPGSD        | EPGSD       |
| 71    | JATIM     | Kab. Bangkalan    | 6,46         | 6,46        | 4,59         | 4,59        | (0,17)       | (0,17)      | 3,02         | 3,02        | 3,24         | 3,24        | 3,70         | 3,70        | 3,47                    | 3,47        | EPGSD        | EPGSD       |
| 72    | JATIM     | Kab. Banyuwangi   | 5,99         | 5,99        | 6,49         | 6,49        | (6,11)       | (6,11)      | 1,72         | 1,72        | 6,58         | 6,58        | 4,69         | 4,69        | 3,23                    | 3,23        | EPGSD        | EPGSD       |
| 73    | JATIM     | Kab. Blitar       | 6,31         | 6,31        | 4,17         | 4,17        | (0,04)       | (0,04)      | 2,09         | 2,09        | 1,79         | 1,79        | 2,41         | 2,41        | 2,79                    | 2,79        | EPGSD        | EPGSD       |
| 74    | JATIM     | Kab. Kediri       | 6,89         | 6,89        | 4,58         | 4,58        | (0,39)       | (0,39)      | 0,92         | 0,92        | 3,96         | 3,96        | 2,58         | 2,58        | 3,09                    | 3,09        | EPGSD        | EPGSD       |
| 75    | JATIM     | Kab. Magetan      | 6,11         | 6,11        | 4,43         | 4,43        | (7,89)       | (7,89)      | 1,80         | 1,80        | 2,34         | 2,34        | 2,71         | 2,71        | 1,58                    | 1,58        | EPGR         | EPGSR       |
| 76    | JATIM     | Kab. Mojokerto    | 7,18         | 7,18        | 4,98         | 4,98        | (8,07)       | (8,07)      | 1,17         | 1,17        | 2,96         | 2,96        | 3,47         | 3,47        | 1,95                    | 1,95        | EPGR         | EPGR        |
| 77    | JATIM     | Kab. Pamekasan    | 6,55         | 6,55        | 4,15         | 4,15        | (5,21)       | (5,21)      | (6,31)       | (6,31)      | 1,43         | 1,43        | 1,59         | 1,59        | 0,37                    | 0,37        | EPGSR        | EPGSR       |
| 78    | JATIM     | Kab. Pasuruan     | 7,21         | 7,21        | 5,48         | 5,48        | (13,68)      | (13,68)     | 5,77         | 5,77        | -0,41        | -0,41       | 3,91         | 3,91        | 1,38                    | 1,38        | EPGR         | EPGSR       |
| 79    | JATIM     | Kab. Sidoarjo     | 8,97         | 8,97        | 5,02         | 5,02        | (15,92)      | (15,92)     | 1,72         | 1,72        | 3,07         | 3,07        | 3,66         | 3,66        | 1,09                    | 1,09        | EPGR         | EPGSR       |
| 80    | JATIM     | Kab. Bondowoso    | 6,99         | 6,99        | 5,18         | 5,18        | (4,93)       | (4,93)      | 1,34         | 1,34        | 2,13         | 2,13        | 1,74         | 1,74        | 2,07                    | 2,07        | EPGR         | EPGR        |
| 81    | JATIM     | Kab. Gresik       | 10,85        | 10,85       | 6,92         | 6,92        | (11,56)      | (11,56)     | 2,02         | 2,02        | 3,04         | 3,04        | 4,64         | 4,64        | 2,65                    | 2,65        | EPGSD        | EPGSD       |
| 82    | JATIM     | Kab. Jember       | 10,37        | 10,37       | 4,54         | 4,54        | (7,58)       | (7,58)      | 1,89         | 1,89        | 3,33         | 3,33        | 3,49         | 3,49        | 2,67                    | 2,67        | EPGSD        | EPGSD       |
| 83    | JATIM     | Kab. Jombang      | 5,89         | 5,89        | 3,36         | 3,36        | (13,34)      | (13,34)     | 0,13         | 0,13        | 4,27         | 4,27        | 2,64         | 2,64        | 0,49                    | 0,49        | EPGSR        | EPGSR       |

| Tahun |          |                          | Growth 1996  |             | Growth 1997  |             | Growth 1998  |             | Growth 1999  |             | Growth 2000  |             | Growth 2001  |             | Rata-Rata 1996 s/d 2001 |             | Intensitas   |             |
|-------|----------|--------------------------|--------------|-------------|--------------|-------------|--------------|-------------|--------------|-------------|--------------|-------------|--------------|-------------|-------------------------|-------------|--------------|-------------|
| No.   | Propinsi | Kabupaten                | Dengan Migas | Tanpa Migas | Dengan Migas            | Tanpa Migas | Dengan Migas | Tanpa Migas |
| 84    | JATIM    | Kab. Lamongan            | 6,76         | 6,76        | 4,64         | 4,64        | (5,10)       | (5,10)      | 2,15         | 2,15        | 2,27         | 2,27        | 2,87         | 2,87        | 2,27                    | 2,27        | EPGSD        | EPGR        |
| 85    | JATIM    | Kab. Ponorogo            | 6,76         | 6,76        | 4,13         | 4,13        | (7,36)       | (7,36)      | 1,18         | 1,18        | 2,05         | 2,05        | 2,77         | 2,77        | 1,59                    | 1,59        | EPGR         | EPGSR       |
| 86    | JATIM    | Kab. Tulungagung         | 11,82        | 11,82       | 4,82         | 4,82        | (6,71)       | (6,71)      | 4,05         | 4,05        | 2,50         | 2,50        | 4,50         | 4,50        | 3,50                    | 3,50        | EPGSD        | EPGSD       |
| 87    | BALI     | Kab. Badung              | 9,10         | 9,10        | 6,50         | 6,50        | (4,96)       | (4,96)      | 0,57         | 0,57        | 4,91         | 4,91        | 5,30         | 5,30        | 3,57                    | 3,57        | EPGSD        | EPGSD       |
| 88    | BALI     | Kab. Bangli              | 7,16         | 7,16        | 4,19         | 4,19        | (2,46)       | (2,46)      | 0,46         | 0,46        | 2,43         | 2,43        | 3,27         | 3,27        | 2,51                    | 2,51        | EPGSD        | EPGR        |
| 89    | BALI     | Kab. Buleleng            | 7,57         | 7,57        | 5,62         | 5,62        | (2,98)       | (2,98)      | 1,08         | 1,08        | 3,54         | 3,54        | 3,72         | 3,72        | 3,09                    | 3,09        | EPGSD        | EPGSD       |
| 90    | BALI     | Kab. Gianyar             | 8,24         | 8,24        | 6,03         | 6,03        | (2,62)       | (2,62)      | 1,76         | 1,76        | 4,70         | 4,70        | 4,51         | 4,51        | 3,77                    | 3,77        | EPGSD        | EPGSD       |
| 91    | BALI     | Kab. Jembrana            | 7,76         | 7,76        | 5,01         | 5,01        | (3,77)       | (3,77)      | 0,90         | 0,90        | 3,48         | 3,48        | 3,36         | 3,36        | 2,79                    | 2,79        | EPGSD        | EPGSD       |
| 92    | BALI     | Kab. Tabanan             | 7,25         | 7,25        | 4,92         | 4,92        | (3,96)       | (3,96)      | 0,58         | 0,58        | 2,49         | 2,49        | 3,30         | 3,30        | 2,43                    | 2,43        | EPGSD        | EPGR        |
| 93    | BALI     | Kab. Karangasem          | 7,13         | 7,13        | 4,76         | 4,76        | (2,70)       | (2,70)      | 0,71         | 0,71        | 2,47         | 2,47        | 2,83         | 2,83        | 2,53                    | 2,53        | EPGSD        | EPGR        |
| 94    | KALBAR   | Kab. Kapuas Hulu         | 8,84         | 8,84        | 6,08         | 6,08        | 1,33         | 1,33        | 2,77         | 2,77        | 3,60         | 3,60        | 2,94         | 2,94        | 4,26                    | 4,26        | EPGSD        | EPGSD       |
| 95    | KALBAR   | Kab. Ketapang            | 10,15        | 10,15       | 7,44         | 7,44        | (2,89)       | (2,89)      | 2,53         | 2,53        | 2,70         | 2,70        | 1,79         | 1,79        | 3,62                    | 3,62        | EPGSD        | EPGSD       |
| 96    | KALBAR   | Kab. Pontianak           | 10,82        | 10,82       | 6,33         | 6,33        | (7,42)       | (7,42)      | 0,95         | 0,95        | 1,15         | 1,15        | 0,82         | 0,82        | 2,11                    | 2,11        | EPGR         | EPGR        |
| 97    | KALBAR   | Kab. Sambas              | 8,15         | 8,15        | 3,93         | 3,93        | 3,07         | 3,07        | 3,87         | 3,87        | 1,38         | 1,38        | 4,36         | 4,36        | 4,13                    | 4,13        | EPGSD        | EPGSD       |
| 98    | KALBAR   | Kab. Sanggau             | 13,93        | 13,93       | 10,79        | 10,79       | 1,33         | 1,33        | 6,14         | 6,14        | 6,96         | 6,96        | 2,22         | 2,22        | 6,89                    | 6,89        | EPGST        | EPGST       |
| 99    | KALTENG  | Kab. Barito Selatan      | 9,41         | 9,41        | 7,02         | 7,02        | (4,94)       | (4,94)      | 0,97         | 0,97        | 1,78         | 1,78        | 2,48         | 2,48        | 2,79                    | 2,79        | EPGSD        | EPGSD       |
| 100   | KALTENG  | Kab. Barito Utara        | 16,80        | 16,80       | 7,79         | 7,79        | (6,08)       | (6,08)      | (5,31)       | (5,31)      | 6,13         | 6,13        | 1,24         | 1,24        | 3,43                    | 3,43        | EPGSD        | EPGSD       |
| 101   | KALTENG  | Kab. Kapuas              | 10,30        | 10,30       | 6,17         | 6,17        | (6,45)       | (6,45)      | (0,55)       | (0,55)      | 1,81         | 1,81        | 4,84         | 4,84        | 2,69                    | 2,69        | EPGSD        | EPGSD       |
| 102   | KALSEL   | Kab. Hulu Sungai Selatan | 6,48         | 6,48        | 3,26         | 3,26        | (4,67)       | (4,67)      | 2,25         | 2,25        | 5,64         | 5,64        | 3,95         | 3,95        | 2,82                    | 2,82        | EPGSD        | EPGSD       |
| 103   | KALSEL   | Kab. Hulu Sungai Tengah  | 7,62         | 7,62        | 1,64         | 1,64        | (18,06)      | (18,06)     | 0,72         | 0,72        | 18,21        | 18,21       | (2,14)       | (2,14)      | 1,33                    | 1,33        | EPGR         | EPGSR       |
| 104   | KALSEL   | Kab. Hulu Sungai Utara   | 19,88        | 20,04       | 1,30         | 0,84        | (6,45)       | (7,41)      | 2,14         | -           | -2,17        | -2,21       | 15,53        | 16,34       | 5,04                    | 5,52        | EPGT         | EPGST       |
| 105   | KALSEL   | Kab. Tabalong            | 13,73        | 15,17       | 14,55        | 9,79        | 28,91        | 15,71       | 13,79        | -           | 7,26         | 9,26        | 2,00         | 5,66        | 13,37                   | 11,12       | EPGST        | EPGST       |
| 106   | KALSEL   | Kab. Tanah Laut          | 8,83         | 8,83        | 0,56         | 0,56        | (13,84)      | (13,84)     | 4,31         | 4,31        | 6,71         | 6,71        | 4,32         | 4,32        | 1,81                    | 1,81        | EPGR         | EPGR        |
| 107   | KALSEL   | Kab. Tapin               | 8,19         | 8,19        | 3,87         | 3,87        | (1,85)       | (1,85)      | 0,17         | 0,17        | 26,86        | 26,86       | (11,02)      | (11,02)     | 4,37                    | 4,37        | EPGSD        | EPGSD       |
| 108   | KALTIM   | Kab. Berau               | 13,09        | 13,09       | (0,65)       | (0,65)      | 16,76        | 16,76       | 6,93         | 6,93        | 33,89        | 12,62       | (11,08)      | 5,72        | 9,82                    | 9,08        | EPGST        | EPGST       |
| 109   | KALTIM   | Kab. Kutai               | 13,34        | 16,14       | 3,68         | 5,06        | (1,37)       | (4,56)      | 7,48         | -           | -47,28       | -59,99      | 5,33         | 13,22       | (3,14)                  | (6,02)      | EPGSR        | EPGSR       |
| 110   | KALTIM   | Kab. Pasir               | 9,73         | 9,73        | 5,53         | 5,53        | 0,72         | 0,72        | 3,54         | 3,54        | 33,29        | 4,22        | (17,68)      | 5,29        | 5,86                    | 4,84        | EPGT         | EPGT        |
| 111   | KALTIM   | Kab. Bulungan            | 8,75         | 9,07        | 5,82         | 7,33        | 0,91         | 0,92        | 5,07         | -           | -44,83       | -49,58      | 19,39        | 28,53       | (0,82)                  | (0,75)      | EPGSR        | EPGSR       |



| Tahun |           |                  | Growth 1996  |             | Growth 1997  |             | Growth 1998  |             | Growth 1999  |             | Growth 2000  |             | Growth 2001  |             | Rata-Rata 1996 s/d 2001 |             | Intensitas   |             |
|-------|-----------|------------------|--------------|-------------|--------------|-------------|--------------|-------------|--------------|-------------|--------------|-------------|--------------|-------------|-------------------------|-------------|--------------|-------------|
| No.   | Propinsi  | Kabupaten        | Dengan Migas | Tanpa Migas | Dengan Migas            | Tanpa Migas | Dengan Migas | Tanpa Migas |
| 112   | KALTIM    | Kab. Kutai Timur | -            | -           | -            | -           | -            | -           | -            | -           | 0,00         | 0,00        | 11,88        | 14,10       | 11,88                   | 14,10       | EPGST        | EPGST       |
| 113   | KALTIM    | Kab. Nunukan     | -            | -           | -            | -           | -            | -           | -            | -           | 0,00         | 0,00        | 36,41        | 27,35       | 36,41                   | 27,35       | EPGST        | EPGST       |
| 114   | SULUT     | Kab. Minahasa    | 14,98        | 14,98       | 6,08         | 6,08        | 2,12         | 2,12        | 6,63         | 6,63        | 7,18         | 7,18        | 4,04         | 4,04        | 6,84                    | 6,84        | EPGST        | EPGST       |
| 115   | SULUT     | Kab. Sangihe     | 10,44        | 10,44       | 4,06         | 4,06        | 2,43         | 2,43        | 3,81         | 3,81        | 4,61         | 4,61        | 5,72         | 5,72        | 5,18                    | 5,18        | EPGT         | EPGT        |
| 116   | GORONTALO | Kab. Gorontalo   | 9,85         | 9,85        | 4,62         | 4,62        | (2,44)       | (2,44)      | 3,06         | 3,06        | -34,48       | -34,48      | 5,86         | 5,86        | (2,26)                  | (2,26)      | EPGSR        | EPGSR       |
| 117   | SULTENG   | Kab. Banggai     | 7,80         | 7,80        | 182,04       | 182,04      | (4,43)       | (4,43)      | 3,26         | 3,26        | 3,53         | 3,53        | 5,06         | 5,06        | 32,88                   | 32,88       | EPGST        | EPGST       |
| 118   | SULTENG   | Kab. Toli-Toli   | -            | -           | 25,53        | 25,53       | (4,63)       | (4,63)      | 2,91         | 2,91        | 12,74        | 12,74       | 5,95         | 5,95        | 8,50                    | 8,50        | EPGST        | EPGST       |
| 119   | SULTENG   | Kab. Donggala    | 8,07         | 8,07        | 4,45         | 4,45        | (3,29)       | (3,29)      | 3,42         | 3,42        | 4,84         | 4,84        | 6,40         | 6,40        | 3,98                    | 3,98        | EPGSD        | EPGSD       |
| 120   | SULTENG   | Kab. Morowali    | -            | -           | 8,89         | 8,89        | 0,66         | 0,66        | 4,76         | 4,76        | 3,90         | 3,90        | -            | -           | 4,55                    | 4,55        | EPGSD        | EPGT        |
| 121   | SULTENG   | Kab. Poso        | 8,42         | 8,42        | 5,15         | 5,15        | (3,40)       | (3,40)      | 2,12         | 2,12        | -4,78        | -4,78       | -            | -           | 1,50                    | 1,50        | EPGR         | EPGSR       |
| 122   | SULTRA    | Kab. Buton       | 5,17         | 5,17        | 2,91         | 2,91        | (9,66)       | (9,66)      | 3,20         | 3,20        | 5,05         | 5,05        | 5,34         | 5,34        | 2,00                    | 2,00        | EPGR         | EPGR        |
| 123   | SULTRA    | Kab. Kolaka      | 2,23         | 2,23        | 6,36         | 6,36        | (1,05)       | (1,05)      | (0,93)       | (0,93)      | 6,59         | 6,59        | 4,95         | 4,95        | 3,02                    | 3,02        | EPGSD        | EPGSD       |
| 124   | SULSEL    | Kab. Luwu        | 9,34         | 9,34        | 2,01         | 2,01        | (4,13)       | (4,13)      | (64,69)      | (64,69)     | 11,44        | 11,44       | 15,93        | 15,93       | (5,02)                  | (5,02)      | EPGSR        | EPGSR       |
| 125   | SULSEL    | Kab. Majene      | 10,81        | 10,81       | 4,66         | 4,66        | (6,78)       | (6,78)      | 4,10         | 4,10        | 2,02         | 2,02        | 3,60         | 3,60        | 3,07                    | 3,07        | EPGSD        | EPGSD       |
| 126   | SULSEL    | Kab. Pangkep     | 6,39         | 6,39        | 11,86        | 11,86       | (6,71)       | (6,71)      | 5,86         | 5,86        | 5,03         | 5,03        | 4,67         | 4,67        | 4,52                    | 4,52        | EPGSD        | EPGT        |
| 127   | SULSEL    | Kab. Pinrang     | 6,99         | 6,99        | 2,68         | 2,68        | (3,54)       | (3,54)      | 0,97         | 0,97        | 4,54         | 4,54        | 4,99         | 4,99        | 2,77                    | 2,77        | EPGSD        | EPGSD       |
| 128   | SULSEL    | Kab. Tana Toraja | 9,12         | 9,12        | 4,68         | 4,68        | (3,38)       | (3,38)      | 1,04         | 1,04        | 2,53         | 2,53        | 4,02         | 4,02        | 3,00                    | 3,00        | EPGSD        | EPGSD       |
| 129   | SULSEL    | Kab. Bantaeng    | 8,97         | 8,97        | 2,32         | 2,32        | 1,95         | 1,95        | 3,30         | 3,30        | 5,26         | 5,26        | 2,23         | 2,23        | 4,00                    | 4,00        | EPGSD        | EPGSD       |
| 130   | SULSEL    | Kab. Barru       | 6,00         | 6,00        | 5,09         | 5,09        | (5,97)       | (5,97)      | 5,59         | 5,59        | -0,39        | -0,39       | 4,58         | 4,58        | 2,48                    | 2,48        | EPGSD        | EPGR        |
| 131   | SULSEL    | Kab. Bone        | 6,09         | 6,09        | 2,30         | 2,30        | (5,98)       | (5,98)      | 2,02         | 2,02        | 2,67         | 2,67        | 3,36         | 3,36        | 1,74                    | 1,74        | EPGR         | EPGR        |
| 132   | SULSEL    | Kab. Enrekang    | 6,49         | 6,49        | 4,27         | 4,27        | (2,91)       | (2,91)      | 4,78         | 4,78        | 3,61         | 3,61        | 4,67         | 4,67        | 3,48                    | 3,48        | EPGSD        | EPGSD       |
| 133   | SULSEL    | Kab. Gowa        | 7,07         | 7,07        | 6,39         | 6,39        | (3,04)       | (3,04)      | 3,76         | 3,76        | 4,27         | 4,27        | 4,49         | 4,49        | 3,82                    | 3,82        | EPGSD        | EPGSD       |
| 134   | SULSEL    | Kab. Jeneponto   | 12,88        | 12,88       | 7,02         | 7,02        | (6,19)       | (6,19)      | 3,13         | 3,13        | 3,63         | 3,63        | 2,96         | 2,96        | 3,91                    | 3,91        | EPGSD        | EPGSD       |
| 135   | SULSEL    | Kab. Luwu Utara  | -            | -           | -            | -           | -            | -           | 16,13        | 16,13       | 4,87         | 4,87        | 4,76         | 4,76        | 8,59                    | 8,59        | EPGST        | EPGST       |
| 136   | SULSEL    | Kab. Maros       | 6,25         | 6,25        | 4,97         | 4,97        | (6,37)       | (6,37)      | 3,69         | 3,69        | 68,26        | 68,26       | 16,57        | 16,57       | 15,56                   | 15,56       | EPGST        | EPGST       |
| 137   | SULSEL    | Kab. Selayar     | 11,48        | 11,48       | 5,59         | 5,59        | (2,14)       | (2,14)      | 1,38         | 1,38        | 3,13         | 3,13        | 2,55         | 2,55        | 3,66                    | 3,66        | EPGSD        | EPGSD       |
| 138   | SULSEL    | Kab. Sinjai      | 7,22         | 7,22        | 3,20         | 3,20        | (4,91)       | (4,91)      | 3,16         | 3,16        | 2,32         | 2,32        | 4,15         | 4,15        | 2,52                    | 2,52        | EPGSD        | EPGR        |
| 139   | SULSEL    | Kab. Takalar     | 7,03         | 7,03        | 6,51         | 6,51        | (5,15)       | (5,15)      | 3,11         | 3,11        | 4,07         | 4,07        | 4,12         | 4,12        | 3,28                    | 3,28        | EPGSD        | EPGSD       |

| Tahun |            |                           | Growth 1996  |             | Growth 1997  |             | Growth 1998  |             | Growth 1999  |             | Growth 2000  |             | Growth 2001  |             | Rata-Rata 1996 s/d 2001 |             | Intensitas   |             |
|-------|------------|---------------------------|--------------|-------------|--------------|-------------|--------------|-------------|--------------|-------------|--------------|-------------|--------------|-------------|-------------------------|-------------|--------------|-------------|
| No.   | Propinsi   | Kabupaten                 | Dengan Migas | Tanpa Migas | Dengan Migas            | Tanpa Migas | Dengan Migas | Tanpa Migas |
| 140   | NTB        | Kab. Bima                 | 7,52         | 7,52        | 4,56         | 4,56        | (2,44)       | (2,44)      | 3,01         | 3,01        | -14,84       | -14,84      | 4,73         | 4,73        | 0,42                    | 0,42        | EPGSR        | EPGSR       |
| 141   | NTB        | Kab. Lombok Barat         | 7,23         | 7,23        | 5,17         | 5,17        | (5,63)       | (5,63)      | 1,61         | 1,61        | -13,89       | -13,89      | 4,72         | 4,72        | (0,13)                  | (0,13)      | EPGSR        | EPGSR       |
| 142   | NTB        | Kab. Dompu                | 7,83         | 7,83        | 5,34         | 5,34        | 1,08         | 1,08        | 7,34         | 7,34        | -13,81       | -13,81      | 5,57         | 5,57        | 2,23                    | 2,23        | EPGSD        | EPGR        |
| 143   | NTB        | Kab. Lombok Timur         | 8,17         | 8,17        | 5,52         | 5,52        | (2,81)       | (2,81)      | 2,33         | 2,33        | -17,71       | -17,71      | 2,54         | 2,54        | (0,33)                  | (0,33)      | EPGSR        | EPGSR       |
| 144   | NTT        | Kab. Ende                 | 7,30         | 7,30        | 6,25         | 6,25        | (10,24)      | (10,24)     | 5,75         | 5,75        | 4,85         | 4,85        | 5,24         | 5,24        | 3,19                    | 3,19        | EPGSD        | EPGSD       |
| 145   | NTT        | Kab. Flores Timur         | 8,44         | 8,44        | 3,15         | 3,15        | (7,02)       | (7,02)      | 12,16        | 12,16       | -17,07       | -17,07      | 5,88         | 5,88        | 0,92                    | 0,92        | EPGR         | EPGSR       |
| 146   | NTT        | Kab. Timur Tengah Selatan | 3,83         | 3,83        | 10,17        | 10,17       | (8,93)       | (8,93)      | 8,72         | 8,72        | 4,65         | 4,65        | 5,44         | 5,44        | 3,98                    | 3,98        | EPGSD        | EPGSD       |
| 147   | NTT        | Kab. Timur Tengah Utara   | 7,04         | 7,04        | 7,25         | 7,25        | 2,67         | 2,67        | (2,72)       | (2,72)      | 3,74         | 3,74        | 4,65         | 4,65        | 3,77                    | 3,77        | EPGSD        | EPGSD       |
| 148   | NTT        | Kab. Belu                 | 7,64         | 7,64        | 8,92         | 8,92        | (5,64)       | (5,64)      | 4,23         | 4,23        | 2,98         | 2,98        | 4,29         | 4,29        | 3,74                    | 3,74        | EPGSD        | EPGSD       |
| 149   | NTT        | Kab. Manggarai            | 6,70         | 6,70        | 5,45         | 5,45        | (3,33)       | (3,33)      | 1,84         | 1,84        | 3,90         | 3,90        | 4,78         | 4,78        | 3,22                    | 3,22        | EPGSD        | EPGSD       |
| 150   | NTT        | Kab. Ngada                | 4,70         | 4,70        | 6,72         | 6,72        | (2,96)       | (2,96)      | 6,00         | 6,00        | 5,04         | 5,04        | 6,00         | 6,00        | 4,25                    | 4,25        | EPGSD        | EPGSD       |
| 151   | NTT        | Kab. Sumba Barat          | 4,99         | 4,99        | 2,73         | 2,73        | (0,42)       | (0,42)      | 0,42         | 0,42        | 3,01         | 3,01        | 4,46         | 4,46        | 2,53                    | 2,53        | EPGSD        | EPGR        |
| 152   | IRJA BARAT | Kab. Fak-Fak              | 18,24        | 18,24       | 3,98         | 3,98        | 35,27        | 35,27       | (1,36)       | (1,36)      | -96,42       | -96,42      | 2,52         | 2,52        | (6,30)                  | (6,30)      | EPGSR        | EPGSR       |
| 153   | IRJA BARAT | Kab. Manokwari            | 7,98         | 7,98        | 6,13         | 6,13        | (10,70)      | (10,70)     | (1,03)       | (1,03)      | 6,72         | 6,72        | 3,33         | 3,33        | 2,07                    | 2,07        | EPGR         | EPGR        |
| 154   | IRJA BARAT | Kab. Sorong               | 3,49         | 7,86        | 24,11        | 33,53       | 3,18         | 1,05        | (25,28)      | (23,18)     | -28,73       | -37,98      | 0,57         | 3,57        | (3,78)                  | (2,52)      | EPGSR        | EPGSR       |
| 155   | PAPUA      | Kab. Jayawijaya           | 8,31         | 8,31        | 4,79         | 4,79        | (1,81)       | (1,81)      | 4,50         | 4,50        | 8,52         | 8,52        | 7,34         | 7,34        | 5,28                    | 5,28        | EPGT         | EPGT        |
| 156   | PAPUA      | Kab. Mimika               | -            | -           | -            | -           | -            | -           | -            | -           | 0,00         | 0,00        | (6,20)       | (6,20)      | (6,20)                  | (6,20)      | EPGSR        | EPGSR       |

**Keterangan :**

EPG : Ekonomi Daerah - Potensi Ekonomi - Growth/Pertumbuhan Ekonomi

Dibelakang EPG - ST : Sangat Tinggi

T : Tinggi

SD : Sedang

R : Rendah

SR : Sangat Rendah

| Keterangan          | Dengan Migas |      | Tanpa Migas |      |
|---------------------|--------------|------|-------------|------|
| Rata-rata           | 3,44         |      | 3,49        |      |
| Stand. Dev          | 2,59         |      | 1,79        |      |
| Interval Intensitas |              |      |             |      |
| EPGST               | 6,03         |      | 5,28        |      |
| EPGT                | 4,73         | 6,03 | 4,38        | 5,28 |
| EPGSD               | 2,14         | 4,73 | 2,59        | 4,38 |
| EPGR                | 2,14         | 0,85 | 2,59        | 1,69 |
| EPGSR               | 0,85         |      | 1,69        |      |

Lampiran 4.3.2.1.2.B Indikator Pertumbuhan PDRB

| Tahun |             |                       | Growth 1996  |             | Growth 1997  |             | Growth 1998  |             | Growth 1999  |             | Growth 2000  |             | Growth 2001  |             | Rata-Rata 1996 s/d 2001 |             | Intensitas   |             |
|-------|-------------|-----------------------|--------------|-------------|--------------|-------------|--------------|-------------|--------------|-------------|--------------|-------------|--------------|-------------|-------------------------|-------------|--------------|-------------|
| No.   | Propinsi    | Kota                  | Dengan Migas | Tanpa Migas | Dengan Migas            | Tanpa Migas | Dengan Migas | Tanpa Migas |
| 1     | SUMUT       | Kota Binjai           | 9,82         | 9,82        | 2,59         | 2,59        | (12,76)      | (12,76)     | 4,44         | 4,44        | 6,80         | 6,80        | 5,56         | 5,56        | 2,74                    | 2,74        | EGPSD        | EGPSD       |
| 2     | SUMUT       | Kota Medan            | 9,75         | 9,75        | 7,73         | 7,73        | (18,11)      | (18,11)     | 3,43         | 3,43        | 5,49         | 5,49        | 5,42         | 5,42        | 2,28                    | 2,28        | EGPSD        | EGPR        |
| 3     | SUMUT       | Kota Pematang Siantar | 5,22         | 5,22        | 6,15         | 6,15        | (4,71)       | (4,71)      | 4,26         | 4,26        | 4,72         | 4,72        | 6,62         | 6,62        | 3,71                    | 3,71        | EGPSD        | EGPSD       |
| 4     | SUMUT       | Kota Sibolga          | 18,30        | 18,30       | 5,96         | 5,96        | (8,37)       | (8,37)      | 5,19         | 5,19        | 5,26         | 5,26        | 6,02         | 6,02        | 5,39                    | 5,39        | EGPT         | EGPST       |
| 5     | SUMUT       | Kota Tanjung Balai    | 9,76         | 9,76        | 7,52         | 7,52        | (7,45)       | (7,45)      | 2,57         | 2,57        | 4,47         | 4,47        | 5,58         | 5,58        | 3,74                    | 3,74        | EGPSD        | EGPSD       |
| 6     | SUMUT       | Kota Tebing Tinggi    | 7,02         | 7,02        | 3,86         | 3,86        | (15,54)      | (15,54)     | 3,12         | 3,12        | 2,93         | 2,93        | 3,47         | 3,47        | 0,81                    | 0,81        | EGPSR        | EGPSR       |
| 7     | SUMBAR      | Kota Padang           | 9,12         | 9,12        | 6,48         | 6,48        | (7,70)       | (7,70)      | 1,71         | 1,71        | 4,18         | 4,18        | 4,20         | 4,20        | 3,00                    | 3,00        | EGPSD        | EGPSD       |
| 8     | SUMBAR      | Kota Sawahlunto       | (4,93)       | (4,93)      | 2,06         | 2,06        | (4,36)       | (4,36)      | (5,91)       | (5,91)      | -6,12        | -6,12       | (2,49)       | (2,49)      | (3,63)                  | (3,63)      | EGPSR        | EGPSR       |
| 9     | RIAU        | Kota Batam            | 16,85        | 16,85       | 14,76        | 14,76       | 3,08         | 3,08        | 6,38         | 6,38        | 7,72         | 7,72        | 6,56         | 6,56        | 9,22                    | 9,22        | EGPST        | EGPST       |
| 10    | RIAU        | Kota Pekanbaru        | 9,56         | 9,56        | 13,32        | 13,32       | (2,48)       | (2,48)      | (1,65)       | (1,65)      | 16,51        | 16,51       | 3,42         | 3,42        | 6,45                    | 6,45        | EGPST        | EGPST       |
| 11    | RIAU        | Kota Dumai            | -            | -           | -            | -           | -            | -           | -            | -           | 0,00         | 0,00        | 4,96         | 4,96        | 4,96                    | 4,96        | EGPT         | EGPT        |
| 12    | SUMSEL      | Kota Palembang        | 8,44         | 8,99        | 5,41         | 6,46        | (11,43)      | (12,51)     | 4,54         | 2,97        | 5,32         | 17,86       | 4,87         | 4,87        | 2,86                    | 4,77        | EGPSD        | EGPT        |
| 13    | BABEL       | Kota Pangkal Pinang   | 8,03         | 8,03        | 7,54         | 7,54        | (2,54)       | (2,54)      | 1,64         | 1,64        | 8,71         | 8,71        | 5,36         | 5,36        | 4,79                    | 4,79        | EGPT         | EGPT        |
| 14    | BENGKULU    | Kota Bengkulu         | 8,12         | 8,12        | 4,85         | 4,85        | (3,36)       | (3,36)      | 3,97         | 3,97        | 5,54         | 5,54        | 5,88         | 5,88        | 4,17                    | 4,17        | EGPSD        | EGPSD       |
| 15    | LAMPUNG     | Kota Bandar Lampung   | 9,26         | 9,26        | 8,49         | 8,49        | (15,10)      | (15,10)     | 3,02         | 3,02        | 3,65         | 3,65        | 3,13         | 3,13        | 2,07                    | 2,07        | EGPR         | EGPR        |
| 16    | BANTEN      | Kota Tangerang        | 17,59        | 17,59       | 11,06        | 11,06       | (16,76)      | (16,76)     | 2,62         | 2,62        | 3,95         | 3,95        | 4,34         | 4,34        | 3,80                    | 3,80        | EGPSD        | EGPSD       |
| 17    | BANTEN      | Kota Cilegon          | -            | -           | -            | -           | -            | -           | -            | -           | 0,00         | 0,00        | 8,76         | 8,76        | 8,76                    | 8,76        | EGPST        | EGPST       |
| 18    | DKI JAKARTA | Kota DKI Jakarta      | 9,10         |             | 5,11         |             | (17,49)      |             | (0,29)       |             | 3,99         |             | 3,64         |             | 0,68                    |             | EGPSR        |             |
| 19    | JABAR       | Kota Bandung          | 9,31         | 9,31        | 4,47         | 4,47        | (19,69)      | (19,69)     | 2,80         | 2,80        | 5,41         | 5,41        | 7,34         | 7,34        | 1,61                    | 1,61        | EGPR         | EGPSR       |
| 20    | JABAR       | Kota Bekasi           | -            | -           | 5,70         | 5,70        | (20,66)      | (20,66)     | 2,63         | 2,63        | 6,95         | 6,95        | 5,26         | 5,26        | (0,02)                  | (0,02)      | EGPSR        | EGPSR       |
| 21    | JABAR       | Kota Bogor            | 11,20        | 11,20       | 5,09         | 5,09        | (16,65)      | (16,65)     | 3,28         | 3,28        | 21,16        | 21,16       | 5,61         | 5,61        | 4,95                    | 4,95        | EGPT         | EGPT        |
| 22    | JABAR       | Kota Cirebon          | 61,66        | 61,66       | 6,64         | 6,64        | (5,36)       | (5,36)      | 2,29         | 2,29        | 9,12         | 9,12        | 4,31         | 4,31        | 13,11                   | 13,11       | EGPST        | EGPST       |
| 23    | JABAR       | Kota Sukabumi         | 7,27         | 7,27        | 3,86         | 3,86        | (17,15)      | (17,15)     | 3,20         | 3,20        | 4,82         | 4,82        | 5,02         | 5,02        | 1,17                    | 1,17        | EGPR         | EGPSR       |
| 24    | JATENG      | Kota Pekalongan       | 7,59         | 7,59        | 3,32         | 3,32        | (8,13)       | (8,13)      | 3,96         | 3,96        | 3,99         | 3,99        | 4,30         | 4,30        | 2,51                    | 2,51        | EGPSD        | EGPR        |
| 25    | JATENG      | Kota Semarang         | 12,77        | 12,77       | 9,73         | 9,73        | (18,23)      | (18,23)     | 3,41         | 3,41        | 4,97         | 4,97        | 5,11         | 5,11        | 2,96                    | 2,96        | EGPSD        | EGPSD       |
| 26    | JATENG      | Kota Tegal            | 8,28         | 8,28        | 3,59         | 3,59        | (6,12)       | (6,12)      | 3,73         | 3,73        | 5,11         | 5,11        | 5,22         | 5,22        | 3,30                    | 3,30        | EGPSD        | EGPSD       |

| Tahun |           |                  | Growth 1996  |             | Growth 1997  |             | Growth 1998  |             | Growth 1999  |             | Growth 2000  |             | Growth 2001  |             | Rata-Rata 1996 s/d 2001 |             | Intensitas   |             |
|-------|-----------|------------------|--------------|-------------|--------------|-------------|--------------|-------------|--------------|-------------|--------------|-------------|--------------|-------------|-------------------------|-------------|--------------|-------------|
| No.   | Propinsi  | Kota             | Dengan Migas | Tanpa Migas | Dengan Migas            | Tanpa Migas | Dengan Migas | Tanpa Migas |
| 27    | JATENG    | Kota Surakarta   | 9,18         | 9,18        | 4,22         | 4,22        | (13,93)      | (13,93)     | 1,44         | 1,44        | 4,15         | 4,15        | 3,93         | 3,93        | 1,50                    | 1,50        | EGPR         | EGPSR       |
| 28    | DI YOGYA  | Kota Jogjakarta  | 9,11         | 9,11        | 4,76         | 4,76        | (11,11)      | (11,11)     | 1,03         | 1,03        | 3,60         | 3,60        | 3,07         | 3,07        | 1,74                    | 1,74        | EGPR         | EGPR        |
| 29    | JATIM     | Kota Kediri      | 13,19        | 13,19       | 11,81        | 11,81       | (2,49)       | (2,49)      | 1,45         | 1,45        | 5,76         | 5,76        | 6,01         | 6,01        | 5,95                    | 5,95        | EGPT         | EGPST       |
| 30    | JATIM     | Kota Malang      | 8,72         | 8,72        | 4,96         | 4,96        | (8,78)       | (8,78)      | 1,54         | 1,54        | 2,96         | 2,96        | 2,30         | 2,30        | 1,95                    | 1,95        | EGPR         | EGPR        |
| 31    | JATIM     | Kota Mojokerto   | 7,38         | 7,38        | 3,34         | 3,34        | (4,50)       | (4,50)      | 1,28         | 1,28        | 8,41         | 8,41        | 2,34         | 2,34        | 3,04                    | 3,04        | EGPSD        | EGPSD       |
| 32    | JATIM     | Kota Probolinggo | 7,20         | 7,20        | 3,03         | 3,03        | (7,08)       | (7,08)      | 3,83         | 3,83        | 1,27         | 1,27        | 1,96         | 1,96        | 1,70                    | 1,70        | EGPR         | EGPR        |
| 33    | JATIM     | Kota Surabaya    | 10,50        | 10,50       | 6,71         | 6,71        | (1,88)       | (1,88)      | (15,25)      | (15,25)     | -11,25       | -11,25      | 4,42         | 4,42        | (1,13)                  | (1,13)      | EGPSR        | EGPSR       |
| 34    | JATIM     | Kota Madiun      | 7,73         | 7,73        | 6,45         | 6,45        | (5,59)       | (5,59)      | 1,10         | 1,10        | 2,67         | 2,67        | 3,55         | 3,55        | 2,65                    | 2,65        | EGPSD        | EGPSD       |
| 35    | BALI      | Kota Denpasar    | 9,15         | 9,15        | 6,48         | 6,48        | (5,23)       | (5,23)      | 1,44         | 1,44        | 3,15         | 3,15        | 3,94         | 3,94        | 3,15                    | 3,15        | EGPSD        | EGPSD       |
| 36    | KALTIM    | Kota Balikpapan  | 13,12        | 12,99       | 2,44         | 8,25        | (0,63)       | (1,13)      | 0,21         |             | 3,63         | 101,78      | 8,73         | 7,90        | 4,58                    | 25,96       | EGPSD        | EGPST       |
| 37    | KALTIM    | Kota Samarinda   | 7,39         | 7,39        | 5,59         | 5,59        | 0,57         | 0,57        | 4,71         | 4,71        | 6,13         | 5,32        | 5,77         | 6,58        | 5,03                    | 5,03        | EGPT         | EGPT        |
| 38    | SULUT     | Kota Bitung      | 13,77        | 13,77       | 7,05         | 7,05        | 3,22         | 3,22        | 6,64         | 6,64        | 44,38        | 44,38       | 5,55         | 5,55        | 13,44                   | 13,44       | EGPST        | EGPST       |
| 39    | SULUT     | Kota Manado      | 10,74        | 10,74       | 2,67         | 2,67        | 0,32         | 0,32        | 1,62         | 1,62        | 5,97         | 5,97        | 4,57         | 4,57        | 4,31                    | 4,31        | EGPSD        | EGPSD       |
| 40    | GORONTALO | Kota Gorontalo   | 9,89         | 9,89        | 5,37         | 5,37        | 2,71         | 2,71        | 4,27         | 4,27        | 5,61         | 5,61        | 5,94         | 5,94        | 5,63                    | 5,63        | EGPT         | EGPST       |
| 41    | SULTRA    | Kota Kendari     | 14,14        | 14,14       | 12,95        | 12,95       | (1,50)       | (1,50)      | (1,82)       | (1,82)      | 7,91         | 7,91        | 7,84         | 7,84        | 6,59                    | 6,59        | EGPST        | EGPST       |
| 42    | SULSEL    | Kota Pare-Pare   | 10,78        | 10,78       | 7,74         | 7,74        | (8,54)       | (8,54)      | 4,17         | 4,17        | 5,60         | 5,60        | 6,05         | 6,05        | 4,30                    | 4,30        | EGPSD        | EGPSD       |
| 43    | N T B     | Kota Mataram     | 10,82        | 10,82       | 7,56         | 7,56        | (2,60)       | (2,60)      | 1,29         | 1,29        | -16,81       | -16,81      | 6,59         | 6,59        | 1,14                    | 1,14        | EGPR         | EGPSR       |
| 44    | N T T     | Kota Kupang      | -            | -           | 4,27         | 4,27        | (8,51)       | (8,51)      | 5,95         | 5,95        | 4,71         | 4,71        | -            | -           | 1,61                    | 1,61        | EGPR         | EGPSR       |

**Keterangan :**

EPG : Ekonomi Daerah - Potensi Ekonomi - Growth/Pertumbuhan Ekonomi

Dibelakang EPG - ST : Sangat Tinggi

T : Tinggi

SD : Sedang

R : Rendah

SR : Sangat Rendah

| Keterangan          | Dengan Migas |      | Tanpa Migas |      |
|---------------------|--------------|------|-------------|------|
| Rata-rata           | 3,44         |      | 3,49        |      |
| Stand.Dev           | 2,59         |      | 1,79        |      |
| Interval Intensitas |              |      |             |      |
| EPGST               | 6,03         |      | 5,28        |      |
| EPGT                | 4,73         | 6,03 | 4,38        | 5,28 |
| EPGSD               | 2,14         | 4,73 | 2,59        | 4,38 |
| EPGR                | 2,14         | 0,85 | 2,59        | 1,69 |
| EPGSR               | 0,85         |      | 1,69        |      |

Lampiran 4.3.2.1.3.A Indikator Indek Pembangunan Manusia (IPM)

| No. | Propinsi         | Kabupaten                  | I P M |       | Reduksi<br>Shortfall<br>1999 - 2002 | Intensitas |
|-----|------------------|----------------------------|-------|-------|-------------------------------------|------------|
|     |                  |                            | 1999  | 2000  |                                     |            |
| 1   | Sumatera Utara   | Kab. Asahan                | 65,10 | 67,00 | 1,80                                | EPISD      |
| 2   | Sumatera Utara   | Kab. Dairi                 | 61,10 | 67,20 | 2,50                                | EPISD      |
| 3   | Sumatera Utara   | Kab. Deli Serdang          | 66,10 | 68,40 | 1,90                                | EPIT       |
| 4   | Sumatera Utara   | Kab. Langkat               | 67,10 | 68,30 | 1,50                                | EPISD      |
| 5   | Sumatera Utara   | Kab. Simalungun            | 65,10 | 68,30 | 2,10                                | EPISD      |
| 6   | Sumatera Utara   | Kab. Tanah Karo            | 69,10 | 70,90 | 1,80                                | EPIT       |
| 7   | Sumatera Utara   | Kab. Labuhan Batu          | 64,00 | 67,30 | 2,10                                | EPISD      |
| 8   | Sumatera Utara   | Kab. Tapanuli Utara        | 65,70 | 67,30 | 1,70                                | EPISD      |
| 9   | Sumatera Barat   | Kab. Pesisir Selatan       | 64,40 | 65,90 | 1,60                                | EPISD      |
| 10  | Sumatera Barat   | Kab. Sawah Lunto Sijunjung | 61,90 | 61,50 | -1,00                               | EPISR      |
| 11  | Sumatera Barat   | Kab. Pasaman               | 62,00 | 64,40 | 1,80                                | EPISD      |
| 12  | Sumatera Barat   | Kab. Solok                 | 61,60 | 63,70 | 1,80                                | EPIR       |
| 13  | Riau             | Kab. Bengkalis             | 66,90 | 69,40 | 2,00                                | EPIT       |
| 14  | Riau             | Kab. Indragiri Hilir       | 66,30 | 67,80 | 1,60                                | EPISD      |
| 15  | Riau             | Kab. Kampar                | 65,30 | 67,80 | 1,90                                | EPISD      |
| 16  | Riau             | Kab. Kuantan Singingi      |       | 66,70 |                                     | EPISD      |
| 17  | Riau             | Kab. Pelalawan             |       | 65,90 |                                     | EPISD      |
| 18  | Riau             | Kab. Rokan Hulu            |       | 64,20 |                                     | EPISD      |
| 19  | Jambi            | Kab. Batanghari            | 64,60 | 66,70 | 1,80                                | EPISD      |
| 20  | Jambi            | Kab. Bungo                 |       | 64,20 |                                     | EPISD      |
| 21  | Jambi            | Kab. Kerinci               | 67,50 | 68,00 | 1,10                                | EPISD      |
| 22  | Jambi            | Kab. Tanjung Jabung Timur  |       | 65,30 |                                     | EPISD      |
| 23  | Jambi            | Kab. Tebo                  |       | 64,90 |                                     | EPISD      |
| 24  | Sumatera Selatan | Kab. Muara Enim            | 63,10 | 64,20 | 1,40                                | EPISD      |
| 25  | Sumatera Selatan | Kab. Musi Banyuasin        | 53,80 | 64,60 | 2,90                                | EPISD      |
| 26  | Sumatera Selatan | Kab. Musi Rawas            | 60,40 | 62,00 | 1,60                                | EPIR       |
| 27  | Sumatera Selatan | Kab. Ogan Kemiling Ilir    | 59,80 | 63,10 | 2,00                                | EPIR       |
| 28  | Sumatera Selatan | Kab. Lahat                 | 63,10 | 65,10 | 1,80                                | EPISD      |
| 29  | Bangka Belitung  | Kab. Bangka                | 63,50 | 64,80 | 1,50                                | EPISD      |
| 30  | Bangka Belitung  | Kab. Belitung              | 65,90 | 66,60 | 1,30                                | EPISD      |
| 31  | Bengkulu         | Kab. Bengkulu Selatan      | 62,00 | 65,00 | 2,00                                | EPISD      |
| 32  | Lampung          | Kab. Lampung Barat         | 62,80 | 63,10 | 0,90                                | EPIR       |
| 33  | Lampung          | Kab. Lampung Selatan       | 63,40 | 64,40 | 1,40                                | EPISD      |
| 34  | Lampung          | Kab. Lampung Timur         |       | 65,70 |                                     | EPISD      |
| 35  | Lampung          | Kab. Lampung Utara         | 60,70 | 66,30 | 2,40                                | EPISD      |
| 36  | Jawa Barat       | Kab. Bandung               | 66,60 | 68,80 | 1,90                                | EPIT       |
| 37  | Lampung          | Kab. Way Kanan             |       | 64,50 |                                     | EPISD      |
| 38  | Banten           | Kab. Lebak                 | 61,00 | 61,60 | 1,10                                | EPISR      |
| 39  | Banten           | Kab. Serang                | 60,80 | 63,70 | 1,90                                | EPIR       |
| 40  | Banten           | Kab. Tangerang             | 63,50 | 68,40 | 2,40                                | EPIT       |
| 41  | Jawa Barat       | Kab. Bekasi                | 64,70 | 66,90 | 1,90                                | EPISD      |
| 42  | Jawa Barat       | Kab. Bogor                 | 66,60 | 65,60 | -1,40                               | EPISD      |
| 43  | Jawa Barat       | Kab. Ciamis                | 64,80 | 65,30 | 1,10                                | EPISD      |
| 44  | Jawa Barat       | Kab. Cianjur               | 63,60 | 64,50 | 1,30                                | EPISD      |
| 45  | Jawa Barat       | Kab. Cirebon               | 61,60 | 62,40 | 1,30                                | EPIR       |
| 46  | Jawa Barat       | Kab. Garut                 | 61,70 | 62,80 | 1,40                                | EPIR       |
| 47  | Jawa Barat       | Kab. Indramayu             | 56,50 | 61,20 | 2,20                                | EPISR      |
| 48  | Jawa Barat       | Kab. Karawang              | 60,90 | 62,90 | 1,70                                | EPIR       |
| 49  | Jawa Barat       | Kab. Kuningan              | 65,00 | 65,00 | 0,40                                | EPISD      |
| 50  | Jawa Barat       | Kab. Purwakarta            | 64,30 | 65,60 | 1,50                                | EPISD      |
| 51  | Jawa Barat       | Kab. Sukabumi              | 63,20 | 63,80 | 1,20                                | EPIR       |
| 52  | Jawa Barat       | Kab. Sumedang              | 66,60 | 67,50 | 1,40                                | EPISD      |
| 53  | Jawa Barat       | Kab. Tasikmalaya           | 65,30 | 67,10 | 1,70                                | EPISD      |
| 54  | Jawa Barat       | Kab. Subang                | 63,10 | 63,00 | -0,60                               | EPIR       |
| 55  | Jawa Tengah      | Kab. Kendal                | 62,10 | 65,50 | 2,10                                | EPISD      |
| 56  | Jawa Tengah      | Kab. Magelang              | 65,10 | 67,20 | 1,80                                | EPISD      |

| No. | Propinsi           | Kabupaten                | I P M |       | Reduksi<br>Shortfall<br>1999 - 2002 | Intensitas |
|-----|--------------------|--------------------------|-------|-------|-------------------------------------|------------|
|     |                    |                          | 1999  | 2000  |                                     |            |
| 57  | Jawa Tengah        | Kab. Pekalongan          | 61,80 | 63,90 | 1,80                                | EPIR       |
| 58  | Jawa Tengah        | Kab. Pemalang            | 60,70 | 62,20 | 1,60                                | EPIR       |
| 59  | Jawa Tengah        | Kab. Sukoharjo           | 66,50 | 67,70 | 1,50                                | EPISD      |
| 60  | Jawa Tengah        | Kab. Tegal               | 62,20 | 63,30 | 1,40                                | EPIR       |
| 61  | Jawa Tengah        | Kab. Banyumas            | 66,00 | 66,70 | 1,20                                | EPISD      |
| 62  | Jawa Tengah        | Kab. Boyolali            | 64,40 | 65,70 | 1,50                                | EPISD      |
| 63  | Jawa Tengah        | Kab. Cilacap             | 63,10 | 65,30 | 1,80                                | EPISD      |
| 64  | Jawa Tengah        | Kab. Jepara              | 65,30 | 66,90 | 1,70                                | EPISD      |
| 65  | Jawa Tengah        | Kab. Karanganyar         | 64,50 | 68,50 | 2,20                                | EPIT       |
| 66  | Jawa Tengah        | Kab. Klaten              | 65,10 | 67,80 | 2,00                                | EPISD      |
| 67  | Jawa Tengah        | Kab. Kudus               | 66,00 | 66,90 | 1,40                                | EPISD      |
| 68  | Jawa Tengah        | Kab. Kebumen             | 64,90 | 65,60 | 1,30                                | EPISD      |
| 69  | DI. Yogyakarta     | Kab. Bantul              | 65,80 | 68,40 | 2,00                                | EPIT       |
| 70  | DI. Yogyakarta     | Kab. Gunung Kidul        | 63,60 | 67,10 | 2,10                                | EPISD      |
| 71  | Jawa Timur         | Kab. Bangkalan           | 52,40 | 57,60 | 2,20                                | EPISR      |
| 72  | Jawa Timur         | Kab. Banyuwangi          | 61,30 | 62,60 | 1,50                                | EPIR       |
| 73  | Jawa Timur         | Kab. Blitar              | 63,80 | 67,40 | 2,20                                | EPISD      |
| 74  | Jawa Timur         | Kab. Kediri              | 64,20 | 66,10 | 1,70                                | EPISD      |
| 75  | Jawa Timur         | Kab. Magetan             | 64,70 | 67,40 | 2,00                                | EPISD      |
| 76  | Jawa Timur         | Kab. Mojokerto           | 64,60 | 67,70 | 2,10                                | EPISD      |
| 77  | Jawa Timur         | Kab. Pamekasan           | 55,50 | 58,30 | 1,80                                | EPISR      |
| 78  | Jawa Timur         | Kab. Pasuruan            | 58,90 | 61,50 | 1,90                                | EPISR      |
| 79  | Jawa Timur         | Kab. Sidoarjo            | 69,10 | 71,70 | 2,00                                | EPISD      |
| 80  | Jawa Timur         | Kab. Bondowoso           | 53,40 | 54,10 | 1,10                                | EPISR      |
| 81  | Jawa Timur         | Kab. Gresik              | 66,40 | 69,30 | 2,10                                | EPIT       |
| 82  | Jawa Timur         | Kab. Jember              | 54,90 | 58,10 | 1,90                                | EPISR      |
| 83  | Jawa Timur         | Kab. Jombang             | 65,10 | 66,00 | 1,40                                | EPISD      |
| 84  | Jawa Timur         | Kab. Lamongan            | 61,80 | 63,90 | 1,80                                | EPIR       |
| 85  | Jawa Timur         | Kab. Ponorogo            | 60,40 | 62,60 | 1,80                                | EPIR       |
| 86  | Jawa Timur         | Kab. Tulungagung         | 65,90 | 67,60 | 1,70                                | EPISD      |
| 87  | Bali               | Kab. Badung              | 68,20 | 70,10 | 1,80                                | EPIT       |
| 88  | Bali               | Kab. Bangli              | 64,40 | 66,70 | 1,90                                | EPISD      |
| 89  | Bali               | Kab. Buleleng            | 63,10 | 63,90 | 1,30                                | EPIR       |
| 90  | Bali               | Kab. Gianyar             | 64,40 | 67,70 | 2,10                                | EPISD      |
| 91  | Bali               | Kab. Jembrana            | 65,50 | 68,90 | 2,10                                | EPIT       |
| 92  | Bali               | Kab. Tabanan             | 63,70 | 70,40 | 1,80                                | EPIT       |
| 93  | Bali               | Kab. Karangasem          | 57,50 | 59,30 | 1,60                                | EPISR      |
| 94  | Kalimantan Barat   | Kab. Kapuas Hulu         | 60,80 | 62,70 | 1,70                                | EPIR       |
| 95  | Kalimantan Barat   | Kab. Ketapang            | 60,80 | 63,60 | 1,90                                | EPIR       |
| 96  | Kalimantan Barat   | Kab. Pontianak           | 60,90 | 64,00 | 2,00                                | EPISD      |
| 97  | Kalimantan Barat   | Kab. Sambas              | 55,80 | 59,30 | 2,00                                | EPISR      |
| 98  | Kalimantan Barat   | Kab. Sanggau             | 61,00 | 62,20 | 1,50                                | EPIR       |
| 99  | Kalimantan Tengah  | Kab. Barito Selatan      | 65,90 | 67,80 | 1,80                                | EPISD      |
| 100 | Kalimantan Tengah  | Kab. Barito Utara        | 67,40 | 69,60 | 1,90                                | EPIT       |
| 101 | Kalimantan Tengah  | Kab. Kapuas              | 67,10 | 69,00 | 1,80                                | EPIT       |
| 102 | Kalimantan Selatan | Kab. Hulu Sungai Selatan | 61,90 | 64,60 | 1,90                                | EPISD      |
| 103 | Kalimantan Selatan | Kab. Hulu Sungai Tengah  | 61,70 | 64,70 | 2,00                                | EPISD      |
| 104 | Kalimantan Selatan | Kab. Hulu Sungai Utara   | 60,60 | 61,70 | 1,40                                | EPISR      |
| 105 | Kalimantan Selatan | Kab. Tabalong            | 61,80 | 63,60 | 1,60                                | EPIR       |
| 106 | Kalimantan Selatan | Kab. Tanah Laut          | 62,50 | 65,90 | 2,10                                | EPISD      |
| 107 | Kalimantan Selatan | Kab. Tapin               | 63,90 | 67,00 | 2,10                                | EPISD      |
| 108 | Kalimantan Timur   | Kab. Berau               | 65,00 | 67,70 | 2,00                                | EPISD      |
| 109 | Kalimantan Timur   | Kab. Kutai               | 65,80 | 67,80 | 1,80                                | EPISD      |
| 110 | Kalimantan Timur   | Kab. Pasir               | 64,70 | 67,90 | 2,10                                | EPISD      |
| 111 | Kalimantan Timur   | Kab. Bulungan            | 68,20 | 69,50 | 1,60                                | EPIT       |
| 112 | Kalimantan Timur   | Kab. Kutai Timur         |       | 66,10 |                                     | EPISD      |

| No.           | Propinsi            | Kabupaten                 | I P M |       | Reduksi<br>Shortfall<br>1999 - 2002 | Intensitas |
|---------------|---------------------|---------------------------|-------|-------|-------------------------------------|------------|
|               |                     |                           | 1999  | 2000  |                                     |            |
| 113           | Kalimantan Timur    | Kab. Nunukan              |       | 67,80 |                                     | EPISD      |
| 114           | Sulawesi Utara      | Kab. Minahasa             | 69,30 | 72,00 | 2,10                                | EPIST      |
| 115           | Sulawesi Utara      | Kab. Sangihe              | 68,00 | 70,10 | 1,90                                | EPIT       |
| 116           | Gorontalo           | Kab. Gorontalo            | 63,30 | 64,70 | 1,60                                | EPISD      |
| 117           | Sulawesi Tengah     | Kab. Banggai              | 66,70 | 67,80 | 1,50                                | EPISD      |
| 118           | Sulawesi Tengah     | Kab. Toli-Toli            |       | 64,20 |                                     | EPISD      |
| 119           | Sulawesi Tengah     | Kab. Donggala             | 60,00 | 62,40 | 1,80                                | EPIR       |
| 120           | Sulawesi Tengah     | Kab. Morowali             |       | 64,90 |                                     | EPISD      |
| 121           | Sulawesi Tengah     | Kab. Poso                 | 62,60 | 64,30 | 1,60                                | EPISD      |
| 122           | Sulawesi Tenggara   | Kab. Buton                | 62,50 | 62,80 | 1,00                                | EPIR       |
| 123           | Sulawesi Tenggara   | Kab. Kolaka               | 62,10 | 65,30 | 2,00                                | EPISD      |
| 124           | Sulawesi Selatan    | Kab. Luwu                 | 68,00 | 68,10 | 0,60                                | EPISD      |
| 125           | Sulawesi Selatan    | Kab. Majene               | 62,10 | 64,00 | 1,70                                | EPISD      |
| 126           | Sulawesi Selatan    | Kab. Pangkep              | 62,70 | 63,80 | 1,40                                | EPIR       |
| 127           | Sulawesi Selatan    | Kab. Pinrang              | 63,50 | 66,00 | 1,90                                | EPISD      |
| 128           | Sulawesi Selatan    | Kab. Tana Toraja          | 63,50 | 67,20 | 2,20                                | EPISD      |
| 129           | Sulawesi Selatan    | Kab. Bantaeng             | 60,90 | 62,60 | 1,60                                | EPIR       |
| 130           | Sulawesi Selatan    | Kab. Barru                | 63,10 | 65,70 | 1,90                                | EPISD      |
| 131           | Sulawesi Selatan    | Kab. Bone                 | 61,80 | 63,00 | 1,50                                | EPIR       |
| 132           | Sulawesi Selatan    | Kab. Enrekang             | 67,20 | 67,30 | 0,70                                | EPISD      |
| 133           | Sulawesi Selatan    | Kab. Gowa                 | 62,70 | 64,10 | 1,50                                | EPISD      |
| 134           | Sulawesi Selatan    | Kab. Jeneponto            | 56,90 | 57,80 | 1,30                                | EPISR      |
| 135           | Sulawesi Selatan    | Kab. Luwu Utara           |       | 67,90 |                                     | EPISD      |
| 136           | Sulawesi Selatan    | Kab. Maros                | 61,50 | 64,00 | 1,90                                | EPISD      |
| 137           | Sulawesi Selatan    | Kab. Selayar              | 62,10 | 63,80 | 1,70                                | EPIR       |
| 138           | Sulawesi Selatan    | Kab. Sinjai               | 62,50 | 64,30 | 1,70                                | EPISD      |
| 139           | Sulawesi Selatan    | Kab. Takalar              | 60,70 | 62,30 | 1,60                                | EPIR       |
| 140           | Nusa Tenggara Barat | Kab. Bima                 | 57,30 | 59,00 | 1,60                                | EPISR      |
| 141           | Nusa Tenggara Barat | Kab. Lombok Barat         | 49,90 | 55,00 | 2,20                                | EPISR      |
| 142           | Nusa Tenggara Barat | Kab. Dompu                | 56,20 | 58,40 | 1,70                                | EPISR      |
| 143           | Nusa Tenggara Barat | Kab. Lombok Timur         | 52,10 | 56,10 | 2,00                                | EPISR      |
| 144           | Nusa Tenggara Timur | Kab. Ende                 | 55,80 | 61,30 | 2,30                                | EPISR      |
| 145           | Nusa Tenggara Timur | Kab. Flores Timur         | 58,10 | 62,60 | 2,20                                | EPIR       |
| 146           | Nusa Tenggara Timur | Kab. Timur Tengah Selatan | 49,20 | 57,70 | 2,60                                | EPISR      |
| 147           | Nusa Tenggara Timur | Kab. Timur Tengah Utara   | 53,70 | 59,50 | 2,30                                | EPISR      |
| 148           | Nusa Tenggara Timur | Kab. Belu                 | 51,80 | 58,30 | 2,40                                | EPISR      |
| 149           | Nusa Tenggara Timur | Kab. Manggarai            | 60,90 | 60,30 | -1,20                               | EPISR      |
| 150           | Nusa Tenggara Timur | Kab. Ngada                | 63,20 | 64,00 | 1,30                                | EPISD      |
| 151           | Nusa Tenggara Timur | Kab. Sumba Barat          | 45,40 | 53,40 | 2,40                                | EPISR      |
| 152           | Irian Jaya Barat    | Kab. Fak-Fak              | 67,30 | 64,30 | -2,10                               | EPISD      |
| 153           | Irian Jaya Barat    | Kab. Manokwari            | 60,10 | 58,00 | -1,70                               | EPISR      |
| 154           | Irian Jaya Barat    | Kab. Sorong               | 63,90 | 62,00 | -1,70                               | EPIR       |
| 155           | Papua               | Kab. Jayawijaya           | 48,70 | 47,00 | -1,50                               | EPISR      |
| 156           | Papua               | Kab. Mimika               |       | 64,80 |                                     | EPISD      |
| IPM Indonesia |                     |                           | 64,3  | 65,8  | 1,60                                |            |

**Catatan :**

- 1) Pada tahun 1999 Kabupaten Tanjung Jabung Timur dan Tanjung Jabung Barat merupakan satu kabuapetrn : Tanjung Jabung
- 2) Pada tahun 1999 Kabupaten Tebo dan Bungo merupakan satu kabupaten : Bungo Tebo
- 3) Pada tahun 1999 Kabupaten Toli-toli dan Buol merupakan satu kabupaten : Buol Toli-toli

**Keterangan :**

**EPI** : Ekonomi Daerah - Potensi Ekonomi - IPM

Dibelakang **EPI** - **ST** : Sangat Tinggi

**T** : Tinggi

**SD** : Sedang

**R** : Rendah

**SR** : Sangat Rendah

|             |       |       |
|-------------|-------|-------|
| Rata-rata   | 66,17 |       |
| Stand. Dev. | 4,45  |       |
| EPISD       | 70,61 |       |
| EPIT        | 68,39 | 70,61 |
| EPISD       | 63,94 | 68,39 |
| EPIR        | 63,94 | 61,72 |
| EPISR       | 61,72 |       |

Lampiran 4.3.2.1.3.B Klasifikasi Indikator Index Pembangunan Manusia (IPM)

| No.           | Propinsi            | Kota                  | IPM   |       | Reduksi<br>Shortfall<br>1999 - 2002 | Intensitas |
|---------------|---------------------|-----------------------|-------|-------|-------------------------------------|------------|
|               |                     |                       | 1999  | 2000  |                                     |            |
| 1             | Sumatera Utara      | Kota Binjai           | 68,50 | 71,60 | 2,10                                | EPIT       |
| 2             | Sumatera Utara      | Kota Medan            | 70,80 | 73,50 | 2,10                                | EPIST      |
| 3             | Sumatera Utara      | Kota Pematang Siantar | 70,90 | 74,10 | 2,20                                | EPIST      |
| 4             | Sumatera Utara      | Kota Sibolga          | 68,90 | 70,70 | 1,80                                | EPIT       |
| 5             | Sumatera Utara      | Kota Tanjung Balai    | 66,80 | 67,80 | 1,40                                | EPISD      |
| 6             | Sumatera Utara      | Kota Tebing Tinggi    | 69,50 | 71,60 | 1,90                                | EPIT       |
| 7             | Sumatera Barat      | Kota Padang           | 70,40 | 73,20 | 2,10                                | EPIST      |
| 8             | Sumatera Barat      | Kota Sawahlunto       | 68,80 | 70,80 | 1,90                                | EPIT       |
| 9             | Riau                | Kota Batam            | 70,90 | 73,20 | 2,00                                | EPIST      |
| 10            | Riau                | Kota Pekanbaru        | 71,70 | 73,40 | 1,80                                | EPIST      |
| 11            | Riau                | Kota Dumai            |       | 71,50 |                                     | EPIT       |
| 12            | Sumatera Selatan    | Kota Palembang        | 68,30 | 71,20 | 2,10                                | EPIT       |
| 13            | Bangka Belitung     | Kota Pangkal Pinang   | 68,00 | 69,60 | 1,70                                | EPIT       |
| 14            | Bengkulu            | Kota Bengkulu         | 71,80 | 72,70 | 1,50                                | EPIST      |
| 15            | Lampung             | Kota Bandar Lampung   | 68,50 | 70,50 | 1,80                                | EPIT       |
| 16            | Banten              | Kota Tangerang        | 68,30 | 72,20 | 2,30                                | EPIST      |
| 17            | Banten              | Kota Cilegon          |       | 70,70 |                                     | EPIT       |
| 18            | DKI Jakarta         | Kota DKI Jakarta      | 72,50 | 75,60 | 2,20                                | EPIST      |
| 19            | Jawa Barat          | Kota Bandung          | 70,70 | 73,00 | 2,00                                | EPIST      |
| 20            | Jawa Barat          | Kota Bekasi           | 68,70 | 72,80 | 2,40                                | EPIST      |
| 21            | Jawa Barat          | Kota Bogor            | 68,10 | 69,20 | 1,50                                | EPIT       |
| 22            | Jawa Barat          | Kota Cirebon          | 69,70 | 71,90 | 1,90                                | EPIST      |
| 23            | Jawa Barat          | Kota Sukabumi         | 68,40 | 69,20 | 1,40                                | EPIT       |
| 24            | Jawa Tengah         | Kota Pekalongan       | 65,90 | 68,20 | 1,90                                | EPISD      |
| 25            | Jawa Tengah         | Kota Semarang         | 70,20 | 73,60 | 2,20                                | EPIST      |
| 26            | Jawa Tengah         | Kota Tegal            | 65,30 | 68,50 | 2,10                                | EPIT       |
| 27            | Jawa Tengah         | Kota Surakarta        | 70,50 | 73,00 | 2,00                                | EPIST      |
| 28            | DI. Yogyakarta      | Kota Jogjakarta       | 73,40 | 75,30 | 1,90                                | EPIST      |
| 29            | Jawa Timur          | Kota Kediri           | 68,60 | 70,80 | 1,90                                | EPIT       |
| 30            | Jawa Timur          | Kota Malang           | 68,00 | 71,40 | 2,20                                | EPIT       |
| 31            | Jawa Timur          | Kota Mojokerto        | 68,60 | 72,80 | 2,40                                | EPIST      |
| 32            | Jawa Timur          | Kota Probolinggo      | 65,10 | 67,70 | 1,90                                | EPISD      |
| 33            | Jawa Timur          | Kota Surabaya         | 69,30 | 72,00 | 2,10                                | EPIST      |
| 34            | Jawa Timur          | Kota Madiun           | 68,70 | 70,70 | 1,90                                | EPIT       |
| 35            | Bali                | Kota Denpasar         | 72,10 | 74,90 | 2,20                                | EPIST      |
| 36            | Kalimantan Timur    | Kota Balikpapan       | 70,60 | 73,00 | 2,00                                | EPIST      |
| 37            | Kalimantan Timur    | Kota Samarinda        | 69,10 | 72,60 | 2,20                                | EPIST      |
| 38            | Sulawesi Utara      | Kota Bitung           | 67,60 | 70,70 | 2,10                                | EPIT       |
| 39            | Sulawesi Utara      | Kota Manado           | 72,50 | 74,20 | 1,80                                | EPIST      |
| 40            | Gorontalo           | Kota Gorontalo        | 62,40 | 65,90 | 4,00                                | EPISD      |
| 41            | Sulawesi Tenggara   | Kota Kendari          | 68,30 | 70,50 | 1,90                                | EPIT       |
| 42            | Sulawesi Selatan    | Kota Pare-Pare        | 69,70 | 72,30 | 2,00                                | EPIST      |
| 43            | Nusa Tenggara Barat | Kota Mataram          | 63,10 | 65,20 | 1,80                                | EPISD      |
| 44            | Nusa Tenggara Timur | Kota Kupang           | 66,60 | 70,90 | 2,40                                | EPIT       |
| IPM Indonesia |                     |                       | 64,3  | 65,8  | 1,60                                |            |

**Keterangan :**

**EPI** : Ekonomi Daerah - Potensi Ekonomi - IPM

Dibelakang **EPI** - **ST** : Sangat Tinggi

**T** : Tinggi

**SD** : Sedang

**R** : Rendah

**SR** : Sangat Rendah

|             |       |       |
|-------------|-------|-------|
| Rata-rata   | 66,17 |       |
| Stand. Dev. | 4,45  |       |
|             |       |       |
| EPIST       | 70,61 |       |
| EPIT        | 68,39 | 70,61 |
| EPISD       | 63,94 | 68,39 |
| EPIR        | 63,94 | 61,72 |
| EPISR       | 61,72 |       |



Lampiran 4.3.2.2.A Variabel Struktur Ekonomi

| No. | Propinsi | Kabupaten                  | Nilai Tambah Sektor |            | Nilai Tambah Sektor |            | Nilai Tambah Sektor |            |
|-----|----------|----------------------------|---------------------|------------|---------------------|------------|---------------------|------------|
|     |          |                            | Primer              | Intensitas | Sekunder            | Intensitas | Tersier             | Intensitas |
| 1   | SUMUT    | Kab. Asahan                | 37,17               | ESPSD      | 42,62               | ESSST      | 20,21               | ESTSR      |
| 2   | SUMUT    | Kab. Dairi                 | 70,52               | ESPST      | 6,77                | ESSR       | 22,71               | ESTSR      |
| 3   | SUMUT    | Kab. Deli Serdang          | 38,73               | ESPSD      | 36,91               | ESST       | 24,37               | ESTR       |
| 4   | SUMUT    | Kab. Langkat               | 65,79               | ESPST      | 13,90               | ESSR       | 20,31               | ESTSR      |
| 5   | SUMUT    | Kab. Simalungun            | 62,11               | ESPT       | 19,21               | ESSSD      | 18,68               | ESTSR      |
| 6   | SUMUT    | Kab. Tanah Karo            | 66,56               | ESPST      | 4,24                | ESSSR      | 29,21               | ESTR       |
| 7   | SUMUT    | Kab. Labuhan Batu          | 35,14               | ESPSD      | 47,17               | ESSST      | 17,70               | ESTSR      |
| 8   | SUMUT    | Kab. Tapanuli Utara        | 61,85               | ESPT       | 6,83                | ESSR       | 31,32               | ESTSD      |
| 9   | SUMBAR   | Kab. Pesisir Selatan       | 34,62               | ESPSD      | 16,60               | ESSSD      | 48,78               | ESTT       |
| 10  | SUMBAR   | Kab. Sawah Lunto Sijunjung | 43,90               | ESPSD      | 16,29               | ESSSD      | 39,81               | ESTSD      |
| 11  | SUMBAR   | Kab. Pasaman               | 43,70               | ESPSD      | 13,09               | ESSR       | 43,21               | ESTSD      |
| 12  | SUMBAR   | Kab. Solok                 | 45,78               | ESPSD      | 14,63               | ESSSD      | 39,58               | ESTSD      |
| 13  | RIAU     | Kab. Bengkalis             | 35,65               | ESPSD      | 14,62               | ESSSD      | 49,74               | ESTT       |
| 14  | RIAU     | Kab. Indragiri Hilir       | 50,84               | ESPSD      | 13,54               | ESSR       | 35,62               | ESTSD      |
| 15  | RIAU     | Kab. Kampar                | 58,87               | ESPT       | 11,35               | ESSR       | 29,77               | ESTR       |
| 16  | RIAU     | Kab. Kuantan Singingi      | 61,22               | ESPT       | 12,09               | ESSR       | 26,68               | ESTR       |
| 17  | RIAU     | Kab. Pelalawan             | 56,08               | ESPT       | 24,10               | ESSSD      | 19,81               | ESTSR      |
| 18  | RIAU     | Kab. Rokan Hulu            | 65,64               | ESPST      | 10,37               | ESSR       | 23,99               | ESTR       |
| 19  | JAMBI    | Kab. Batanghari            | 42,28               | ESPSD      | 20,21               | ESSSD      | 37,51               | ESTSD      |
| 20  | JAMBI    | Kab. Bungo                 | 47,68               | ESPSD      | 9,81                | ESSR       | 42,50               | ESTSD      |
| 21  | JAMBI    | Kab. Kerinci               | 41,48               | ESPSD      | 8,37                | ESSR       | 50,16               | ESTT       |
| 22  | JAMBI    | Kab. Tanjung Jabung Timur  | 68,51               | ESPST      | 9,93                | ESSR       | 21,56               | ESTSR      |
| 23  | JAMBI    | Kab. Tebo                  | 58,67               | ESPT       | 7,20                | ESSR       | 34,13               | ESTSD      |
| 24  | SUMSEL   | Kab. Muara Enim            | 88,25               | ESPST      | 4,31                | ESSSR      | 7,44                | ESTSR      |
| 25  | SUMSEL   | Kab. Musi Banyuasin        | 78,12               | ESPST      | 7,88                | ESSR       | 14,00               | ESTSR      |
| 26  | SUMSEL   | Kab. Musi Rawas            | 76,46               | ESPST      | 12,09               | ESSR       | 11,45               | ESTSR      |
| 27  | SUMSEL   | Kab. Ogan Kemiling Ilir    | 45,70               | ESPSD      | 21,31               | ESSSD      | 32,99               | ESTSD      |
| 28  | SUMSEL   | Kab. Lahat                 | 47,64               | ESPSD      | 20,94               | ESSSD      | 31,41               | ESTSD      |
| 29  | BABEL    | Kab. Bangka                | 43,67               | ESPSD      | 39,47               | ESSST      | 16,86               | ESTSR      |
| 30  | BABEL    | Kab. Belitung              | 32,90               | ESPSD      | 28,39               | ESSSD      | 38,71               | ESTSD      |
| 31  | BENGKULU | Kab. Bengkulu Selatan      | 39,64               | ESPSD      | 10,63               | ESSR       | 49,73               | ESTT       |
| 32  | LAMPUNG  | Kab. Lampung Barat         | 60,57               | ESPT       | 8,93                | ESSR       | 30,50               | ESTR       |
| 33  | LAMPUNG  | Kab. Lampung Selatan       | 53,82               | ESPT       | 18,00               | ESSSD      | 28,19               | ESTR       |
| 34  | LAMPUNG  | Kab. Lampung Timur         | 61,72               | ESPT       | 11,56               | ESSR       | 26,73               | ESTR       |
| 35  | LAMPUNG  | Kab. Bandung               | 8,89                | ESPSR      | 63,22               | ESSST      | 27,90               | ESTR       |
| 36  | JABAR    | Kab. Lampung Utara         | 57,61               | ESPT       | 9,13                | ESSR       | 33,26               | ESTSD      |
| 37  | LAMPUNG  | Kab. Way Kanan             | 62,17               | ESPT       | 11,39               | ESSR       | 26,44               | ESTR       |
| 38  | BANTEN   | Kab. Lebak                 | 42,25               | ESPSD      | 13,37               | ESSR       | 44,38               | ESTSD      |
| 39  | BANTEN   | Kab. Serang                | 15,05               | ESPSR      | 60,95               | ESSST      | 24,00               | ESTR       |
| 40  | BANTEN   | Kab. Tangerang             | 9,49                | ESPSR      | 66,55               | ESSST      | 23,96               | ESTR       |
| 41  | JABAR    | Kab. Bekasi                | 2,60                | ESPSR      | 85,44               | ESSST      | 11,96               | ESTSR      |
| 42  | JABAR    | Kab. Bogor                 | 13,77               | ESPSR      | 57,39               | ESSST      | 28,84               | ESTR       |
| 43  | JABAR    | Kab. Ciamis                | 33,86               | ESPSD      | 16,82               | ESSSD      | 49,32               | ESTT       |
| 44  | JABAR    | Kab. Cianjur               | 47,45               | ESPSD      | 6,46                | ESSR       | 46,09               | ESTSD      |
| 45  | JABAR    | Kab. Cirebon               | 33,72               | ESPSD      | 20,71               | ESSSD      | 45,58               | ESTSD      |
| 46  | JABAR    | Kab. Garut                 | 41,46               | ESPSD      | 12,63               | ESSR       | 45,91               | ESTSD      |
| 47  | JABAR    | Kab. Indramayu             | 66,18               | ESPST      | 19,04               | ESSSD      | 14,77               | ESTSR      |
| 48  | JABAR    | Kab. Karawang              | 24,41               | ESPR       | 36,42               | ESST       | 39,17               | ESTSD      |
| 49  | JABAR    | Kab. Kuningan              | 38,21               | ESPSD      | 10,01               | ESSR       | 51,79               | ESTT       |
| 50  | JABAR    | Kab. Purwakarta            | 10,90               | ESPSR      | 51,94               | ESSST      | 37,16               | ESTSD      |
| 51  | JABAR    | Kab. Sukabumi              | 43,12               | ESPSD      | 18,69               | ESSSD      | 38,19               | ESTSD      |
| 52  | JABAR    | Kab. Sumedang              | 33,67               | ESPSD      | 20,47               | ESSSD      | 45,86               | ESTSD      |
| 53  | JABAR    | Kab. Tasikmalaya           | 27,83               | ESPR       | 18,34               | ESSSD      | 53,84               | ESTT       |
| 54  | JABAR    | Kab. Subang                | 50,87               | ESPSD      | 8,36                | ESSR       | 40,78               | ESTSD      |
| 55  | JATENG   | Kab. Kendal                | 27,41               | ESPR       | 42,77               | ESSST      | 29,82               | ESTR       |
| 56  | JATENG   | Kab. Magelang              | 37,74               | ESPSD      | 24,07               | ESSSD      | 38,19               | ESTSD      |

| No. | Propinsi  | Kabupaten                | Nilai Tambah Sektor |            | Nilai Tambah Sektor |            | Nilai Tambah Sektor |            |
|-----|-----------|--------------------------|---------------------|------------|---------------------|------------|---------------------|------------|
|     |           |                          | Primer              | Intensitas | Sekunder            | Intensitas | Tersier             | Intensitas |
| 57  | JATENG    | Kab. Pekalongan          | 19,59               | ESPR       | 37,28               | ESST       | 43,13               | ESTSD      |
| 58  | JATENG    | Kab. Pemalang            | 38,61               | ESPSD      | 23,25               | ESSSD      | 38,14               | ESTSD      |
| 59  | JATENG    | Kab. Sukoharjo           | 28,29               | ESPR       | 32,41               | ESST       | 39,29               | ESTSD      |
| 60  | JATENG    | Kab. Tegal               | 25,64               | ESPR       | 29,06               | ESSSD      | 45,29               | ESTSD      |
| 61  | JATENG    | Kab. Banyumas            | 29,67               | ESPSD      | 25,49               | ESSSD      | 44,85               | ESTSD      |
| 62  | JATENG    | Kab. Boyolali            | 41,67               | ESPSD      | 14,57               | ESSSD      | 43,75               | ESTSD      |
| 63  | JATENG    | Kab. Cilacap             | 14,33               | ESPSR      | 49,24               | ESSST      | 36,43               | ESTSD      |
| 64  | JATENG    | Kab. Jepara              | 23,49               | ESPR       | 31,83               | ESST       | 44,68               | ESTSD      |
| 65  | JATENG    | Kab. Karanganyar         | 23,40               | ESPR       | 44,88               | ESSST      | 31,72               | ESTSD      |
| 66  | JATENG    | Kab. Klaten              | 23,99               | ESPR       | 31,34               | ESST       | 44,67               | ESTSD      |
| 67  | JATENG    | Kab. Kudus               | 3,95                | ESPSR      | 63,62               | ESSST      | 32,43               | ESTSD      |
| 68  | JATENG    | Kab. Kebumen             | 49,32               | ESPSD      | 11,25               | ESSR       | 39,42               | ESTSD      |
| 69  | DI. YOGYA | Kab. Bantul              | 30,76               | ESPSD      | 26,60               | ESSSD      | 42,64               | ESTSD      |
| 70  | DI. YOGYA | Kab. Gunung Kidul        | 43,24               | ESPSD      | 19,21               | ESSSD      | 37,55               | ESTSD      |
| 71  | JATIM     | Kab. Bangkalan           | 43,51               | ESPSD      | 9,75                | ESSR       | 46,74               | ESTSD      |
| 72  | JATIM     | Kab. Banyuwangi          | 57,10               | ESPT       | 6,31                | ESSR       | 36,58               | ESTSD      |
| 73  | JATIM     | Kab. Blitar              | 46,82               | ESPSD      | 6,24                | ESSR       | 46,94               | ESTSD      |
| 74  | JATIM     | Kab. Kediri              | 44,20               | ESPSD      | 14,21               | ESSSD      | 41,59               | ESTSD      |
| 75  | JATIM     | Kab. Magetan             | 41,32               | ESPSD      | 16,92               | ESSSD      | 41,76               | ESTSD      |
| 76  | JATIM     | Kab. Mojokerto           | 28,17               | ESPR       | 34,92               | ESST       | 36,90               | ESTSD      |
| 77  | JATIM     | Kab. Pamekasan           | 63,75               | ESPST      | 5,59                | ESSR       | 30,67               | ESTR       |
| 78  | JATIM     | Kab. Pasuruan            | 31,15               | ESPSD      | 36,88               | ESST       | 31,97               | ESTSD      |
| 79  | JATIM     | Kab. Sidoarjo            | 7,78                | ESPSR      | 56,85               | ESSST      | 35,37               | ESTSD      |
| 80  | JATIM     | Kab. Bondowoso           | 51,87               | ESPT       | 11,65               | ESSR       | 36,48               | ESTSD      |
| 81  | JATIM     | Kab. Gresik              | 13,57               | ESPSR      | 58,55               | ESSST      | 27,88               | ESTR       |
| 82  | JATIM     | Kab. Jember              | 50,52               | ESPSD      | 12,31               | ESSR       | 37,17               | ESTSD      |
| 83  | JATIM     | Kab. Jombang             | 41,38               | ESPSD      | 15,89               | ESSSD      | 42,73               | ESTSD      |
| 84  | JATIM     | Kab. Lamongan            | 53,10               | ESPT       | 9,46                | ESSR       | 37,44               | ESTSD      |
| 85  | JATIM     | Kab. Ponorogo            | 33,83               | ESPSD      | 19,13               | ESSSD      | 47,04               | ESTSD      |
| 86  | JATIM     | Kab. Tulungagung         | 23,37               | ESPR       | 24,10               | ESSSD      | 52,53               | ESTT       |
| 87  | BALI      | Kab. Badung              | 8,52                | ESPSR      | 8,84                | ESSR       | 82,64               | ESTST      |
| 88  | BALI      | Kab. Bangli              | 32,34               | ESPSD      | 13,38               | ESSR       | 54,28               | ESTT       |
| 89  | BALI      | Kab. Buleleng            | 28,08               | ESPR       | 13,32               | ESSR       | 58,60               | ESTST      |
| 90  | BALI      | Kab. Gianyar             | 23,17               | ESPR       | 24,50               | ESSSD      | 52,33               | ESTT       |
| 91  | BALI      | Kab. Jembrana            | 29,56               | ESPSD      | 12,96               | ESSR       | 57,48               | ESTST      |
| 92  | BALI      | Kab. Tabanan             | 37,34               | ESPSD      | 12,40               | ESSR       | 50,26               | ESTT       |
| 93  | BALI      | Kab. Karangasem          | 37,29               | ESPSD      | 12,20               | ESSR       | 50,51               | ESTT       |
| 94  | KALBAR    | Kab. Kapuas Hulu         | 53,53               | ESPT       | 8,99                | ESSR       | 37,48               | ESTSD      |
| 95  | KALBAR    | Kab. Ketapang            | 33,11               | ESPSD      | 25,59               | ESSSD      | 41,31               | ESTSD      |
| 96  | KALBAR    | Kab. Pontianak           | 21,56               | ESPR       | 45,87               | ESSST      | 32,57               | ESTSD      |
| 97  | KALBAR    | Kab. Sambas              | 40,12               | ESPSD      | 14,10               | ESSSD      | 45,78               | ESTSD      |
| 98  | KALBAR    | Kab. Sanggau             | 41,51               | ESPSD      | 31,79               | ESST       | 26,70               | ESTR       |
| 99  | KALTENG   | Kab. Barito Selatan      | 50,51               | ESPSD      | 13,66               | ESSR       | 35,83               | ESTSD      |
| 100 | KALTENG   | Kab. Barito Utara        | 63,54               | ESPST      | 6,57                | ESSR       | 29,89               | ESTR       |
| 101 | KALTENG   | Kab. Kapuas              | 52,56               | ESPT       | 13,48               | ESSR       | 33,96               | ESTSD      |
| 102 | KALSEL    | Kab. Hulu Sungai Selatan | 44,17               | ESPSD      | 12,01               | ESSR       | 43,82               | ESTSD      |
| 103 | KALSEL    | Kab. Hulu Sungai Tengah  | 40,07               | ESPSD      | 12,94               | ESSR       | 46,99               | ESTSD      |
| 104 | KALSEL    | Kab. Hulu Sungai Utara   | 68,31               | ESPST      | 7,14                | ESSR       | 24,55               | ESTR       |
| 105 | KALSEL    | Kab. Tabalong            | 78,10               | ESPST      | 3,98                | ESSSR      | 17,92               | ESTSR      |
| 106 | KALSEL    | Kab. Tanah Laut          | 42,37               | ESPSD      | 23,18               | ESSSD      | 34,45               | ESTSD      |
| 107 | KALSEL    | Kab. Tapin               | 50,81               | ESPSD      | 9,61                | ESSR       | 39,59               | ESTSD      |
| 108 | KALTIM    | Kab. Berau               | 60,11               | ESPT       | 16,63               | ESSSD      | 23,26               | ESTR       |
| 109 | KALTIM    | Kab. Kutai               | 87,15               | ESPST      | 6,50                | ESSR       | 6,35                | ESTSR      |
| 110 | KALTIM    | Kab. Pasir               | 66,49               | ESPST      | 14,31               | ESSSD      | 19,20               | ESTSR      |
| 111 | KALTIM    | Kab. Bulungan            | 71,34               | ESPST      | 12,86               | ESSR       | 15,80               | ESTSR      |
| 112 | KALTIM    | Kab. Kutai Timur         | 84,55               | ESPST      | 7,45                | ESSR       | 8,00                | ESTSR      |

| No. | Propinsi   | Kabupaten                 | Nilai Tambah Sektor |            | Nilai Tambah Sektor |            | Nilai Tambah Sektor |            |
|-----|------------|---------------------------|---------------------|------------|---------------------|------------|---------------------|------------|
|     |            |                           | Primer              | Intensitas | Sekunder            | Intensitas | Tersier             | Intensitas |
| 113 | KALTIM     | Kab. Nunukan              | 76,88               | ESPST      | 9,09                | ESSR       | 14,04               | ESTSR      |
| 114 | SULUT      | Kab. Minahasa             | 44,68               | ESPST      | 21,79               | ESSSD      | 33,53               | ESTSD      |
| 115 | SULUT      | Kab. Sangihe              | 54,90               | ESPT       | 10,06               | ESSR       | 35,04               | ESTSD      |
| 116 | GORONTALO  | Kab. Gorontalo            | 44,68               | ESPST      | 19,76               | ESSSD      | 35,56               | ESTSD      |
| 117 | SULTENG    | Kab. Banggai              | 56,47               | ESPT       | 15,42               | ESSSD      | 28,11               | ESTR       |
| 118 | SULTENG    | Kab. Toli-Toli            | 54,20               | ESPT       | 13,75               | ESSR       | 32,05               | ESTSD      |
| 119 | SULTENG    | Kab. Donggala             | 57,61               | ESPT       | 13,29               | ESSR       | 29,10               | ESTR       |
| 120 | SULTENG    | Kab. Morowali             | 67,19               | ESPST      | 7,70                | ESSR       | 25,11               | ESTR       |
| 121 | SULTENG    | Kab. Poso                 | 46,62               | ESPST      | 17,67               | ESSSD      | 35,70               | ESTSD      |
| 122 | SULTRA     | Kab. Buton                | 37,63               | ESPST      | 15,28               | ESSSD      | 47,09               | ESTSD      |
| 123 | SULTRA     | Kab. Kolaka               | 52,05               | ESPT       | 19,67               | ESSSD      | 28,28               | ESTR       |
| 124 | SULSEL     | Kab. Luwu                 | 59,99               | ESPT       | 14,43               | ESSSD      | 25,59               | ESTR       |
| 125 | SULSEL     | Kab. Majene               | 58,58               | ESPT       | 9,39                | ESSR       | 32,03               | ESTSD      |
| 126 | SULSEL     | Kab. Pangkep              | 28,27               | ESPR       | 51,86               | ESSST      | 19,87               | ESTSR      |
| 127 | SULSEL     | Kab. Pinrang              | 68,58               | ESPST      | 7,92                | ESSR       | 23,49               | ESTR       |
| 128 | SULSEL     | Kab. Tana Toraja          | 56,74               | ESPT       | 8,88                | ESSR       | 34,38               | ESTSD      |
| 129 | SULSEL     | Kab. Bantaeng             | 62,17               | ESPT       | 9,46                | ESSR       | 28,37               | ESTR       |
| 130 | SULSEL     | Kab. Barru                | 53,89               | ESPT       | 11,58               | ESSR       | 34,53               | ESTSD      |
| 131 | SULSEL     | Kab. Bone                 | 65,41               | ESPST      | 10,76               | ESSR       | 23,83               | ESTR       |
| 132 | SULSEL     | Kab. Enrekang             | 62,15               | ESPT       | 9,11                | ESSR       | 28,74               | ESTR       |
| 133 | SULSEL     | Kab. Gowa                 | 52,76               | ESPT       | 10,75               | ESSR       | 36,49               | ESTSD      |
| 134 | SULSEL     | Kab. Jeneponto            | 62,12               | ESPT       | 7,21                | ESSR       | 30,67               | ESTR       |
| 135 | SULSEL     | Kab. Luwu Utara           | 91,52               | ESPST      | 1,71                | ESSSR      | 6,77                | ESTSR      |
| 136 | SULSEL     | Kab. Maros                | 36,50               | ESPST      | 45,33               | ESSST      | 18,17               | ESTSR      |
| 137 | SULSEL     | Kab. Selayar              | 47,75               | ESPST      | 12,75               | ESSR       | 39,50               | ESTSD      |
| 138 | SULSEL     | Kab. Sinjai               | 68,63               | ESPST      | 5,23                | ESSSR      | 26,13               | ESTR       |
| 139 | SULSEL     | Kab. Takalar              | 50,49               | ESPST      | 15,28               | ESSSD      | 34,23               | ESTSD      |
| 140 | N T B      | Kab. Bima                 | 50,72               | ESPST      | 6,88                | ESSR       | 42,39               | ESTSD      |
| 141 | N T B      | Kab. Lombok Barat         | 40,25               | ESPST      | 10,83               | ESSR       | 48,92               | ESTT       |
| 142 | N T B      | Kab. Dompu                | 54,89               | ESPT       | 6,99                | ESSR       | 38,12               | ESTSD      |
| 143 | N T B      | Kab. Lombok Timur         | 47,09               | ESPST      | 8,47                | ESSR       | 44,44               | ESTSD      |
| 144 | N T T      | Kab. Ende                 | 34,87               | ESPST      | 11,43               | ESSR       | 53,70               | ESTT       |
| 145 | N T T      | Kab. Flores Timur         | 44,79               | ESPST      | 6,20                | ESSR       | 49,01               | ESTT       |
| 146 | N T T      | Kab. Timur Tengah Selatan | 60,36               | ESPT       | 6,26                | ESSR       | 33,37               | ESTSD      |
| 147 | N T T      | Kab. Timur Tengah Utara   | 57,48               | ESPT       | 9,26                | ESSR       | 33,25               | ESTSD      |
| 148 | N T T      | Kab. Belu                 | 46,33               | ESPST      | 7,53                | ESSR       | 46,14               | ESTSD      |
| 149 | N T T      | Kab. Manggarai            | 62,87               | ESPST      | 9,01                | ESSR       | 28,12               | ESTR       |
| 150 | N T T      | Kab. Ngada                | 56,74               | ESPT       | 11,50               | ESSR       | 31,76               | ESTSD      |
| 151 | N T T      | Kab. Sumba Barat          | 62,73               | ESPST      | 6,05                | ESSR       | 31,23               | ESTR       |
| 152 | IRJA BARAT | Kab. Fak-Fak              | 36,76               | ESPST      | 29,00               | ESSSD      | 34,23               | ESTSD      |
| 153 | IRJA BARAT | Kab. Manokwari            | 57,98               | ESPT       | 16,67               | ESSSD      | 25,35               | ESTR       |
| 154 | IRJA BARAT | Kab. Sorong               | 77,76               | ESPST      | 9,20                | ESSR       | 13,05               | ESTSR      |
| 155 | PAPUA      | Kab. Jayawijaya           | 63,77               | ESPST      | 4,36                | ESSSR      | 31,87               | ESTSD      |
| 156 | PAPUA      | Kab. Mimika               | 98,42               | ESPST      | 0,53                | ESSSR      | 1,05                | ESTSR      |

**Keterangan :**

**ESP** : Ekonomi Daerah - Struktur Ekonomi - Sektor Primer

**ESS** : Ekonomi Daerah - Struktur Ekonomi - Sektor Sekunder

**EST** : Ekonomi Daerah - Struktur Ekonomi - Sektor Tersier

Dibelakang **ESP/ESS/EST** - **ST** : Sangat Tinggi

**T** : Tinggi

**SD** : Sedang

**R** : Rendah

**SR** : Sangat Rendah

|           | Primer |       | Sekunder |       | Tersier |       |
|-----------|--------|-------|----------|-------|---------|-------|
| Rata-rata | 39,87  |       | 22,31    |       | 39,52   |       |
| Stan.Dev. | 22,45  |       | 16,74    |       | 16,42   |       |
|           |        |       |          |       |         |       |
| ST        | 62,32  |       | 39,05    |       | 55,94   |       |
| T         | 51,09  | 62,32 | 30,68    | 39,05 | 47,73   | 55,94 |
| SD        | 28,65  | 51,09 | 13,94    | 30,68 | 31,31   | 47,73 |
| R         | 28,65  | 17,42 | 13,94    | 5,56  | 31,31   | 23,10 |
| SR        | 17,42  |       | 5,56     |       | 23,10   |       |

Lampiran 4.3.2.2.B Variabel Struktur Ekonomi

| No. | Propinsi    | Kota                  | Nilai Tambah Sektor |            | Nilai Tambah Sektor |            | Nilai Tambah Sektor |            |
|-----|-------------|-----------------------|---------------------|------------|---------------------|------------|---------------------|------------|
|     |             |                       | Primer              | Intensitas | Sekunder            | Intensitas | Tersier             | Intensitas |
| 1   | SUMUT       | Kota Binjai           | 9,98                | ESPSR      | 39,32               | ESSST      | 50,70               | ESTT       |
| 2   | SUMUT       | Kota Medan            | 4,36                | ESPSR      | 28,66               | ESSSD      | 66,99               | ESTST      |
| 3   | SUMUT       | Kota Pematang Siantar | 3,72                | ESPSR      | 44,35               | ESSST      | 51,93               | ESTT       |
| 4   | SUMUT       | Kota Sibolga          | 28,18               | ESPR       | 28,25               | ESSSD      | 43,57               | ESTSD      |
| 5   | SUMUT       | Kota Tanjung Balai    | 26,89               | ESPR       | 31,79               | ESST       | 41,33               | ESTSD      |
| 6   | SUMUT       | Kota Tebing Tinggi    | 8,35                | ESPSR      | 34,78               | ESST       | 56,86               | ESTST      |
| 7   | SUMBAR      | Kota Padang           | 5,52                | ESPSR      | 22,56               | ESSSD      | 71,92               | ESTST      |
| 8   | SUMBAR      | Kota Sawahlunto       | 42,47               | ESPSD      | 15,01               | ESSSD      | 42,52               | ESTSD      |
| 9   | RIAU        | Kota Batam            | 2,48                | ESPSR      | 74,82               | ESSST      | 22,70               | ESDSR      |
| 10  | RIAU        | Kota Pekanbaru        | 1,57                | ESPSR      | 22,72               | ESSSD      | 75,71               | ESTST      |
| 11  | RIAU        | Kota Dumai            | 9,09                | ESPSR      | 21,48               | ESSSD      | 69,43               | ESTST      |
| 12  | SUMSEL      | Kota Palembang        | 0,69                | ESPSR      | 46,44               | ESSST      | 52,86               | ESTT       |
| 13  | BABEL       | Kota Pangkal Pinang   | 18,20               | ESPR       | 22,14               | ESSSD      | 59,66               | ESTST      |
| 14  | BENGKULU    | Kota Bengkulu         | 4,57                | ESPSR      | 10,54               | ESSR       | 84,89               | ESTST      |
| 15  | LAMPUNG     | Kota Bandar Lampung   | 3,69                | ESPSR      | 37,77               | ESST       | 58,53               | ESTST      |
| 16  | BANTEN      | Kota Tangerang        | 0,21                | ESPSR      | 61,39               | ESSST      | 38,40               | ESTSD      |
| 17  | BANTEN      | Kota Cilegon          | 3,40                | ESPSR      | 73,54               | ESSST      | 23,06               | ESDSR      |
| 18  | DKI JAKARTA | Kota DKI Jakarta      | 0,21                | ESPSR      | 36,32               | ESST       | 62,39               | ESTST      |
| 19  | JABAR       | Kota Bandung          | 0,44                | ESPSR      | 38,39               | ESST       | 61,18               | ESTST      |
| 20  | JABAR       | Kota Bekasi           | 1,45                | ESPSR      | 54,47               | ESSST      | 44,08               | ESTSD      |
| 21  | JABAR       | Kota Bogor            | 0,39                | ESPSR      | 38,45               | ESST       | 61,15               | ESTST      |
| 22  | JABAR       | Kota Cirebon          | 0,35                | ESPSR      | 46,61               | ESSST      | 53,04               | ESTT       |
| 23  | JABAR       | Kota Sukabumi         | 4,07                | ESPSR      | 11,04               | ESSR       | 84,88               | ESTST      |
| 24  | JATENG      | Kota Pekalongan       | 13,70               | ESPSR      | 35,28               | ESST       | 51,03               | ESTT       |
| 25  | JATENG      | Kota Semarang         | 1,49                | ESPSR      | 33,53               | ESST       | 64,98               | ESTST      |
| 26  | JATENG      | Kota Tegal            | 15,96               | ESPSR      | 29,42               | ESSSD      | 54,62               | ESTT       |
| 27  | JATENG      | Kota Surakarta        | 1,86                | ESPSR      | 40,97               | ESSST      | 57,17               | ESTST      |
| 28  | DI . YOGYA  | Kota Jogjakarta       | 1,04                | ESPSR      | 20,44               | ESSSD      | 78,52               | ESTST      |
| 29  | JATIM       | Kota Kediri           | 0,20                | ESPSR      | 78,65               | ESSST      | 21,16               | ESDSR      |
| 30  | JATIM       | Kota Malang           | 0,79                | ESPSR      | 42,75               | ESSST      | 56,46               | ESTST      |
| 31  | JATIM       | Kota Mojokerto        | 1,65                | ESPSR      | 27,38               | ESSSD      | 70,98               | ESTST      |
| 32  | JATIM       | Kota Probolinggo      | 10,75               | ESPSR      | 27,31               | ESSSD      | 61,94               | ESTST      |
| 33  | JATIM       | Kota Surabaya         | 0,22                | ESPSR      | 46,41               | ESSST      | 53,38               | ESTT       |
| 34  | JATIM       | Kota Madiun           | 2,57                | ESPSR      | 43,22               | ESSST      | 54,22               | ESTT       |
| 35  | BALI        | Kota Denpasar         | 8,26                | ESPSR      | 18,97               | ESSSD      | 72,77               | ESTST      |
| 36  | KALTIM      | Kota Balikpapan       | 8,34                | ESPSR      | 44,63               | ESSST      | 47,03               | ESTSD      |
| 37  | KALTIM      | Kota Samarinda        | 3,38                | ESPSR      | 37,89               | ESST       | 58,73               | ESTST      |
| 38  | SULUT       | Kota Bitung           | 12,32               | ESPSR      | 39,22               | ESSST      | 48,46               | ESTT       |
| 39  | SULUT       | Kota Manado           | 3,41                | ESPSR      | 19,65               | ESSSD      | 76,94               | ESTST      |
| 40  | GORONTALO   | Kota Gorontalo        | 11,73               | ESPSR      | 12,84               | ESSR       | 75,44               | ESTST      |
| 41  | SULTRA      | Kota Kendari          | 24,60               | ESPR       | 17,35               | ESSSD      | 58,06               | ESTST      |
| 42  | SULSEL      | Kota Pare-Pare        | 9,18                | ESPSR      | 13,86               | ESSR       | 76,96               | ESTST      |
| 43  | N T B       | Kota Mataram          | 4,77                | ESPSR      | 10,40               | ESSR       | 84,83               | ESTST      |
| 44  | N T T       | Kota Kupang           | 6,29                | ESPSR      | 16,64               | ESSSD      | 77,07               | ESTST      |

**Keterangan :**

**ESP** : Ekonomi Daerah - Struktur Ekonomi - Sektor Primer  
**ESS** : Ekonomi Daerah - Struktur Ekonomi - Sektor Sekunder  
**EST** : Ekonomi Daerah - Struktur Ekonomi - Sektor Tersier  
Dibelakang **ESP/ESS/EST** - **ST** : Sangat Tinggi  
**T** : Tinggi  
**SD** : Sedang  
**R** : Rendah  
**SR** : Sangat Rendah

|           | Primer |       | Sekunder |       | Tersier |       |
|-----------|--------|-------|----------|-------|---------|-------|
| Rata-rata | 39,87  |       | 22,31    |       | 39,52   |       |
| Stan.Dev. | 22,45  |       | 16,74    |       | 16,42   |       |
| ST        | 62,32  |       | 39,05    |       | 55,94   |       |
| T         | 51,09  | 62,32 | 30,68    | 39,05 | 47,73   | 55,94 |
| SD        | 28,65  | 51,09 | 13,94    | 30,68 | 31,31   | 47,73 |
| R         | 28,65  | 17,42 | 13,94    | 5,56  | 31,31   | 23,10 |
| SR        | 17,42  |       | 5,56     |       | 23,10   |       |

Lampiran 4.3.3. Hasil Klasifikasi Indikator Faktor Tenaga Kerja dan Produktivitas

Lampiran 4.3.3.1. Variabel Ketersediaan Tenaga Kerja

Lampiran 4.3.3.1.1.A. Indikator Penduduk Usia Produktif

| No. | Propinsi         | Kabupaten                  | Usia Produktif | Jumlah Penduduk | Rasio | Intensitas |
|-----|------------------|----------------------------|----------------|-----------------|-------|------------|
| 1   | Sumatera Utara   | Kab. Asahan                | 615.849        | 1.013.145       | 60,79 | TSPSK      |
| 2   | Sumatera Utara   | Kab. Dairi                 | 213.829        | 390.082         | 54,82 | TSPSK      |
| 3   | Sumatera Utara   | Kab. Deli Serdang          | 1.371.828      | 2.055.077       | 66,75 | TSPC       |
| 4   | Sumatera Utara   | Kab. Langkat               | 610.850        | 882.647         | 69,21 | TSPC       |
| 5   | Sumatera Utara   | Kab. Simalungun            | 483.552        | 785.720         | 61,54 | TSPSK      |
| 6   | Sumatera Utara   | Kab. Tanah Karo            | 183.969        | 301.837         | 60,95 | TSPSK      |
| 7   | Sumatera Utara   | Kab. Labuhan Batu          | 621.358        | 1.017.309       | 61,08 | TSPSK      |
| 8   | Sumatera Utara   | Kab. Tapanuli Utara        | 259.328        | 415.330         | 62,44 | TSPK       |
| 9   | Sumatera Barat   | Kab. Pesisir Selatan       | 218.564        | 342.236         | 63,86 | TSPK       |
| 10  | Sumatera Barat   | Kab. Sawah Lunto Sijunjung | 208.488        | 322.952         | 64,56 | TSPK       |
| 11  | Sumatera Barat   | Kab. Pasaman               | 357.144        | 570.736         | 62,58 | TSPK       |
| 12  | Sumatera Barat   | Kab. Solok                 | 249.368        | 401.208         | 62,15 | TSPSK      |
| 13  | Riau             | Kab. Bengkalis             | 406.107        | 562.006         | 72,26 | TSPSB      |
| 14  | Riau             | Kab. Indragiri Hilir       | 186.964        | 292.214         | 63,98 | TSPK       |
| 15  | Riau             | Kab. Kampar                | 178.434        | 264.152         | 67,55 | TSPC       |
| 16  | Riau             | Kab. Kuantan Singingi      | 383.581        | 562.903         | 68,14 | TSPC       |
| 17  | Riau             | Kab. Pelalawan             | 52.886         | 121.126         | 43,66 | TSPSK      |
| 18  | Riau             | Kab. Rokan Hulu            | 241.983        | 346.058         | 69,93 | TSPB       |
| 19  | Jambi            | Kab. Batanghari            | 134.118        | 194.121         | 69,09 | TSPC       |
| 20  | Jambi            | Kab. Bungo                 | 139.908        | 221.367         | 63,20 | TSPK       |
| 21  | Jambi            | Kab. Kerinci               | 202.740        | 300.861         | 67,39 | TSPC       |
| 22  | Jambi            | Kab. Tanjung Jabung Timur  | 131.781        | 193.404         | 68,14 | TSPC       |
| 23  | Jambi            | Kab. Tebo                  | 138.960        | 211.914         | 65,57 | TSPC       |
| 24  | Sumatera Selatan | Kab. Muara Enim            | 558.566        | 925.497         | 60,35 | TSPSK      |
| 25  | Sumatera Selatan | Kab. Musi Banyuasin        | 915.269        | 1.409.792       | 64,92 | TSPC       |
| 26  | Sumatera Selatan | Kab. Musi Rawas            | 499.390        | 785.007         | 63,62 | TSPK       |
| 27  | Sumatera Selatan | Kab. Ogan Kemiling Ilir    | 614.431        | 909.659         | 67,55 | TSPC       |
| 28  | Sumatera Selatan | Kab. Lahat                 | 377.594        | 609.549         | 61,95 | TSPSK      |
| 29  | Bangka Belitung  | Kab. Bangka                | 367.518        | 596.704         | 61,59 | TSPSK      |
| 30  | Bangka Belitung  | Kab. Belitung              | 118.520        | 169.758         | 69,82 | TSPB       |
| 31  | Bengkulu         | Kab. Bengkulu Selatan      | 260.460        | 392.814         | 66,31 | TSPC       |
| 32  | Lampung          | Kab. Lampung Barat         | 251.339        | 381.425         | 65,89 | TSPC       |
| 33  | Lampung          | Kab. Lampung Selatan       | 756.965        | 1.148.455       | 65,91 | TSPC       |
| 34  | Lampung          | Kab. Lampung Timur         | 623.997        | 901.021         | 69,25 | TSPC       |
| 35  | Lampung          | Kab. Lampung Utara         | 367.587        | 540.914         | 67,96 | TSPC       |
| 36  | Jawa Barat       | Kab. Bandung               | 3.146.443      | 4.553.779       | 69,10 | TSPC       |
| 37  | Lampung          | Kab. Way Kanan             | 191.114        | 280.247         | 68,19 | TSPC       |
| 38  | Banten           | Kab. Lebak                 | 677.976        | 1.057.032       | 64,14 | TSPK       |
| 39  | Banten           | Kab. Serang                | 1.139.760      | 1.893.188       | 60,20 | TSPSK      |
| 40  | Banten           | Kab. Tangerang             | 1.841.296      | 2.783.532       | 66,15 | TSPC       |
| 41  | Jawa Barat       | Kab. Bekasi                | 1.486.204      | 2.218.560       | 66,99 | TSPC       |
| 42  | Jawa Barat       | Kab. Bogor                 | 2.311.525      | 3.586.296       | 64,45 | TSPK       |
| 43  | Jawa Barat       | Kab. Ciamis                | 1.022.093      | 1.468.505       | 69,60 | TSPB       |
| 44  | Jawa Barat       | Kab. Cianjur               | 1.357.215      | 2.066.141       | 65,69 | TSPC       |
| 45  | Jawa Barat       | Kab. Cirebon               | 1.055.546      | 1.583.827       | 66,65 | TSPC       |
| 46  | Jawa Barat       | Kab. Garut                 | 1.308.979      | 2.052.392       | 63,78 | TSPK       |
| 47  | Jawa Barat       | Kab. Indramayu             | 1.114.292      | 1.622.904       | 68,66 | TSPC       |
| 48  | Jawa Barat       | Kab. Karawang              | 1.297.717      | 1.831.674       | 70,85 | TSPB       |
| 49  | Jawa Barat       | Kab. Kuningan              | 627.977        | 923.157         | 68,02 | TSPC       |
| 50  | Jawa Barat       | Kab. Purwakarta            | 535.182        | 802.688         | 66,67 | TSPC       |
| 51  | Jawa Barat       | Kab. Sukabumi              | 1.414.595      | 2.162.830       | 65,40 | TSPC       |
| 52  | Jawa Barat       | Kab. Sumedang              | 567.977        | 781.196         | 72,71 | TSPSB      |
| 53  | Jawa Barat       | Kab. Tasikmalaya           | 1.433.420      | 2.029.409       | 70,63 | TSPB       |
| 54  | Jawa Barat       | Kab. Subang                | 967.507        | 1.313.338       | 73,67 | TSPSB      |
| 55  | Jawa Tengah      | Kab. Kendal                | 652.804        | 930.190         | 70,18 | TSPB       |
| 56  | Jawa Tengah      | Kab. Magelang              | 731.898        | 1.042.704       | 70,19 | TSPB       |

| No. | Propinsi           | Kabupaten                | Usia Produktif | Jumlah Penduduk | Rasio | Intensitas |
|-----|--------------------|--------------------------|----------------|-----------------|-------|------------|
| 57  | Jawa Tengah        | Kab. Pekalongan          | 641.664        | 987.004         | 65,01 | TSPC       |
| 58  | Jawa Tengah        | Kab. Pemalang            | 648.348        | 984.776         | 65,84 | TSPC       |
| 59  | Jawa Tengah        | Kab. Sukoharjo           | 554.772        | 754.178         | 73,56 | TSPSB      |
| 60  | Jawa Tengah        | Kab. Tegal               | 877.832        | 1.367.992       | 64,17 | TSPK       |
| 61  | Jawa Tengah        | Kab. Banyumas            | 1.078.352      | 1.513.926       | 71,23 | TSPB       |
| 62  | Jawa Tengah        | Kab. Boyolali            | 606.016        | 892.314         | 67,92 | TSPC       |
| 63  | Jawa Tengah        | Kab. Cilacap             | 1.072.782      | 1.615.300       | 66,41 | TSPC       |
| 64  | Jawa Tengah        | Kab. Jepara              | 662.830        | 982.548         | 67,46 | TSPC       |
| 65  | Jawa Tengah        | Kab. Karanganyar         | 551.430        | 768.660         | 71,74 | TSPB       |
| 66  | Jawa Tengah        | Kab. Klaten              | 808.764        | 1.128.482       | 71,67 | TSPB       |
| 67  | Jawa Tengah        | Kab. Kudus               | 611.586        | 870.034         | 70,29 | TSPB       |
| 68  | Jawa Tengah        | Kab. Kebumen             | 839.956        | 1.298.924       | 64,67 | TSPC       |
| 69  | DI. Yogyakarta     | Kab. Bantul              | 606.940        | 840.823         | 72,18 | TSPSB      |
| 70  | DI. Yogyakarta     | Kab. Gunung Kidul        | 450.800        | 631.966         | 71,33 | TSPB       |
| 71  | Jawa Timur         | Kab. Bangkalan           | 474.894        | 734.055         | 64,69 | TSPC       |
| 72  | Jawa Timur         | Kab. Banyuwangi          | 1.086.477      | 1.481.067       | 73,36 | TSPSB      |
| 73  | Jawa Timur         | Kab. Blitar              | 724.584        | 1.045.926       | 69,28 | TSPC       |
| 74  | Jawa Timur         | Kab. Kediri              | 1.082.886      | 1.563.282       | 69,27 | TSPC       |
| 75  | Jawa Timur         | Kab. Magetan             | 482.685        | 664.797         | 72,61 | TSPSB      |
| 76  | Jawa Timur         | Kab. Mojokerto           | 615.657        | 877.212         | 70,18 | TSPB       |
| 77  | Jawa Timur         | Kab. Pamekasan           | 476.952        | 689.871         | 69,14 | TSPC       |
| 78  | Jawa Timur         | Kab. Pasuruan            | 1.109.976      | 1.545.411       | 71,82 | TSPSB      |
| 79  | Jawa Timur         | Kab. Sidoarjo            | 1.369.935      | 1.880.172       | 72,86 | TSPSB      |
| 80  | Jawa Timur         | Kab. Bondowoso           | 462.504        | 673.407         | 68,68 | TSPC       |
| 81  | Jawa Timur         | Kab. Gresik              | 691.026        | 982.695         | 70,32 | TSPB       |
| 82  | Jawa Timur         | Kab. Jember              | 1.568.511      | 2.149.476       | 72,97 | TSPSB      |
| 83  | Jawa Timur         | Kab. Jombang             | 790.125        | 1.153.572       | 68,49 | TSPC       |
| 84  | Jawa Timur         | Kab. Lamongan            | 798.252        | 1.100.463       | 72,54 | TSPSB      |
| 85  | Jawa Timur         | Kab. Ponorogo            | 661.857        | 919.863         | 71,95 | TSPSB      |
| 86  | Jawa Timur         | Kab. Tulungagung         | 651.315        | 905.100         | 71,96 | TSPSB      |
| 87  | Bali               | Kab. Badung              | 280.847        | 372.502         | 75,39 | TSPSB      |
| 88  | Bali               | Kab. Bangli              | 147.525        | 197.080         | 74,86 | TSPSB      |
| 89  | Bali               | Kab. Buleleng            | 344.249        | 504.034         | 68,30 | TSPC       |
| 90  | Bali               | Kab. Gianyar             | 269.257        | 367.439         | 73,28 | TSPSB      |
| 91  | Bali               | Kab. Jembrana            | 162.239        | 232.650         | 69,74 | TSPB       |
| 92  | Bali               | Kab. Tabanan             | 291.519        | 404.917         | 71,99 | TSPSB      |
| 93  | Bali               | Kab. Karangasem          | 238.659        | 359.290         | 66,43 | TSPC       |
| 94  | Kalimantan Barat   | Kab. Kapuas Hulu         | 152.424        | 230.096         | 66,24 | TSPC       |
| 95  | Kalimantan Barat   | Kab. Ketapang            | 395.022        | 584.924         | 67,53 | TSPC       |
| 96  | Kalimantan Barat   | Kab. Pontianak           | 560.545        | 821.584         | 68,23 | TSPC       |
| 97  | Kalimantan Barat   | Kab. Sambas              | 265.161        | 436.148         | 60,80 | TSPSK      |
| 98  | Kalimantan Barat   | Kab. Sanggau             | 307.768        | 459.024         | 67,05 | TSPC       |
| 99  | Kalimantan Tengah  | Kab. Barito Selatan      | 121.317        | 182.109         | 66,62 | TSPC       |
| 100 | Kalimantan Tengah  | Kab. Barito Utara        | 88.755         | 145.258         | 61,10 | TSPSK      |
| 101 | Kalimantan Tengah  | Kab. Kapuas              | 363.210        | 559.398         | 64,93 | TSPC       |
| 102 | Kalimantan Selatan | Kab. Hulu Sungai Selatan | 139.006        | 208.006         | 66,83 | TSPC       |
| 103 | Kalimantan Selatan | Kab. Hulu Sungai Tengah  | 181.279        | 264.309         | 68,59 | TSPC       |
| 104 | Kalimantan Selatan | Kab. Hulu Sungai Utara   | 162.256        | 246.585         | 65,80 | TSPC       |
| 105 | Kalimantan Selatan | Kab. Tabalong            | 121.865        | 171.659         | 70,99 | TSPB       |
| 106 | Kalimantan Selatan | Kab. Tanah Laut          | 197.817        | 280.777         | 70,45 | TSPB       |
| 107 | Kalimantan Selatan | Kab. Tapin               | 73.617         | 105.101         | 70,04 | TSPB       |
| 108 | Kalimantan Timur   | Kab. Berau               | 102.899        | 149.879         | 68,65 | TSPC       |
| 109 | Kalimantan Timur   | Kab. Kutai               | 286.860        | 424.890         | 67,51 | TSPC       |
| 110 | Kalimantan Timur   | Kab. Pasir               | 181.438        | 293.939         | 61,73 | TSPSK      |
| 111 | Kalimantan Timur   | Kab. Bulungan            | 103.576        | 145.316         | 71,28 | TSPB       |
| 112 | Kalimantan Timur   | Kab. Kutai Timur         | 68.304         | 101.053         | 67,59 | TSPC       |

| No. | Propinsi            | Kabupaten                 | Usia Produktif | Jumlah Penduduk | Rasio | Intensitas |
|-----|---------------------|---------------------------|----------------|-----------------|-------|------------|
| 113 | Kalimantan Timur    | Kab. Nunukan              | 59.388         | 87.024          | 68,24 | TSPC       |
| 114 | Sulawesi Utara      | Kab. Minahasa             | 530.268        | 747.826         | 70,91 | TSPB       |
| 115 | Sulawesi Utara      | Kab. Sangihe              | 153.884        | 226.083         | 68,07 | TSPC       |
| 116 | Gorontalo           | Kab. Gorontalo            | 310.968        | 466.824         | 66,61 | TSPC       |
| 117 | Sulawesi Tengah     | Kab. Banggai              | 202.626        | 320.307         | 63,26 | TSPK       |
| 118 | Sulawesi Tengah     | Kab. Toli-Toli            | 106.173        | 188.172         | 56,42 | TSPSK      |
| 119 | Sulawesi Tengah     | Kab. Donggala             | 581.403        | 882.459         | 65,88 | TSPC       |
| 120 | Sulawesi Tengah     | Kab. Morowali             | 108.558        | 169.683         | 63,98 | TSPK       |
| 121 | Sulawesi Tengah     | Kab. Poso                 | 122.739        | 172.617         | 71,10 | TSPB       |
| 122 | Sulawesi Tenggara   | Kab. Buton                | 320.554        | 534.403         | 59,98 | TSPSK      |
| 123 | Sulawesi Tenggara   | Kab. Kolaka               | 233.289        | 369.178         | 63,19 | TSPK       |
| 124 | Sulawesi Selatan    | Kab. Luwu                 | 220.616        | 356.133         | 61,95 | TSPSK      |
| 125 | Sulawesi Selatan    | Kab. Majene               | 64.904         | 107.604         | 60,32 | TSPSK      |
| 126 | Sulawesi Selatan    | Kab. Pangkep              | 163.968        | 239.974         | 68,33 | TSPC       |
| 127 | Sulawesi Selatan    | Kab. Pinrang              | 233.316        | 353.073         | 66,08 | TSPC       |
| 128 | Sulawesi Selatan    | Kab. Tana Toraja          | 267.696        | 403.349         | 66,37 | TSPC       |
| 129 | Sulawesi Selatan    | Kab. Bantaeng             | 149.349        | 229.188         | 65,16 | TSPC       |
| 130 | Sulawesi Selatan    | Kab. Barru                | 72.590         | 111.020         | 65,38 | TSPC       |
| 131 | Sulawesi Selatan    | Kab. Bone                 | 480.536        | 713.655         | 67,33 | TSPC       |
| 132 | Sulawesi Selatan    | Kab. Enrekang             | 152.866        | 232.288         | 65,81 | TSPC       |
| 133 | Sulawesi Selatan    | Kab. Gowa                 | 400.454        | 604.482         | 66,25 | TSPC       |
| 134 | Sulawesi Selatan    | Kab. Jeneponto            | 217.770        | 350.994         | 62,04 | TSPSK      |
| 135 | Sulawesi Selatan    | Kab. Luwu Utara           | 318.542        | 497.882         | 63,98 | TSPK       |
| 136 | Sulawesi Selatan    | Kab. Maros                | 220.092        | 330.924         | 66,51 | TSPC       |
| 137 | Sulawesi Selatan    | Kab. Selayar              | 70.882         | 99.064          | 71,55 | TSPB       |
| 138 | Sulawesi Selatan    | Kab. Sinjai               | 71.736         | 107.604         | 66,67 | TSPC       |
| 139 | Sulawesi Selatan    | Kab. Takalar              | 157.990        | 245.952         | 64,24 | TSPK       |
| 140 | Nusa Tenggara Barat | Kab. Bima                 | 344.950        | 543.797         | 63,43 | TSPK       |
| 141 | Nusa Tenggara Barat | Kab. Lombok Barat         | 436.021        | 686.027         | 63,56 | TSPK       |
| 142 | Nusa Tenggara Barat | Kab. Dompu                | 170.814        | 286.396         | 59,64 | TSPSK      |
| 143 | Nusa Tenggara Barat | Kab. Lombok Timur         | 676.645        | 1.070.090       | 63,23 | TSPK       |
| 144 | Nusa Tenggara Timur | Kab. Ende                 | 168.947        | 273.963         | 61,67 | TSPSK      |
| 145 | Nusa Tenggara Timur | Kab. Flores Timur         | 118.572        | 194.340         | 61,01 | TSPSK      |
| 146 | Nusa Tenggara Timur | Kab. Timur Tengah Selatan | 202.212        | 310.452         | 65,13 | TSPC       |
| 147 | Nusa Tenggara Timur | Kab. Timur Tengah Utara   | 123.000        | 205.656         | 59,81 | TSPSK      |
| 148 | Nusa Tenggara Timur | Kab. Belu                 | 164.517        | 263.664         | 62,40 | TSPK       |
| 149 | Nusa Tenggara Timur | Kab. Manggarai            | 346.944        | 598.469         | 57,97 | TSPSK      |
| 150 | Nusa Tenggara Timur | Kab. Ngada                | 130.380        | 223.368         | 58,37 | TSPSK      |
| 151 | Nusa Tenggara Timur | Kab. Sumba Barat          | 171.216        | 312.420         | 54,80 | TSPSK      |
| 152 | Irian Jaya Barat    | Kab. Fak-Fak              | 60.782         | 96.094          | 63,25 | TSPK       |
| 153 | Irian Jaya Barat    | Kab. Manokwari            | 150.964        | 243.898         | 61,90 | TSPSK      |
| 154 | Irian Jaya Barat    | Kab. Sorong               | 124.564        | 200.852         | 62,02 | TSPSK      |
| 155 | Papua               | Kab. Jayawijaya           | 247.272        | 381.818         | 64,76 | TSPC       |
| 156 | Papua               | Kab. Mimika               | 37.846         | 61.984          | 61,06 | TSPSK      |

Sumber : Susenas Kor 2002, BPS Pusat

**Keterangan :**

**TSP** : Tenaga Kerja - Ketersediaan - Usia Produktif

Dibelakang **TSP** - **ST** : Sangat Tinggi

**T** : Tinggi

**SD** : Sedang

**R** : Rendah

**SR** : Sangat Rendah

|           |       |       |       |       |
|-----------|-------|-------|-------|-------|
| Rata-rata | 67,03 |       |       |       |
| Standev   | 4,72  |       |       |       |
| Median    | 67,33 |       |       |       |
|           |       |       |       |       |
| TSPSB     | 71,76 |       | 72,06 |       |
| TSPB      | 69,39 | 71,76 | 69,70 | 72,06 |
| TSPC      | 64,67 | 69,39 | 64,97 | 69,70 |
| TSPK      | 64,67 | 62,31 | 64,97 | 62,61 |
| TSPSK     | 62,31 |       | 62,61 |       |

Lampiran 4.3.3.1.1.B. Indikator Penduduk Usia Produktif

| No. | Propinsi            | Kota                  | Usia Produktif | Jumlah Penduduk | Rasio | Intensitas |
|-----|---------------------|-----------------------|----------------|-----------------|-------|------------|
| 1   | Sumatera Utara      | Kota Binjai           | 168.974        | 240.396         | 70,29 | TSPB       |
| 2   | Sumatera Utara      | Kota Medan            | 1.372.696      | 2.031.172       | 67,58 | TSPC       |
| 3   | Sumatera Utara      | Kota Pematang Siantar | 153.296        | 228.202         | 67,18 | TSPC       |
| 4   | Sumatera Utara      | Kota Sibolga          | 74.035         | 138.489         | 53,46 | TSPSK      |
| 5   | Sumatera Utara      | Kota Tanjung Balai    | 82.745         | 134.134         | 61,69 | TSPSK      |
| 6   | Sumatera Utara      | Kota Tebing Tinggi    | 82.745         | 125.424         | 65,97 | TSPC       |
| 7   | Sumatera Barat      | Kota Padang           | 523.364        | 733.828         | 71,32 | TSPB       |
| 8   | Sumatera Barat      | Kota Sawahlunto       | 47.888         | 71.248          | 67,21 | TSPC       |
| 9   | Riau                | Kota Batam            | 292.275        | 417.644         | 69,98 | TSPB       |
| 10  | Riau                | Kota Pekanbaru        | 770.804        | 1.185.626       | 65,01 | TSPC       |
| 11  | Riau                | Kota Dumai            |                |                 |       |            |
| 12  | Sumatera Selatan    | Kota Palembang        | 979.900        | 1.388.112       | 70,59 | TSPB       |
| 13  | Bangka Belitung     | Kota Pangkal Pinang   | 105.336        | 150.290         | 70,09 | TSPB       |
| 14  | Bengkulu            | Kota Bengkulu         | 177.489        | 267.525         | 66,34 | TSPC       |
| 15  | Lampung             | Kota Bandar Lampung   | 591.668        | 872.916         | 67,78 | TSPC       |
| 16  | Banten              | Kota Tangerang        | 1.067.476      | 1.510.088       | 70,69 | TSPB       |
| 17  | Banten              | Kota Cilegon          | 329.992        | 496.580         | 66,45 | TSPC       |
| 18  | DKI Jakarta         | Kota DKI Jakarta      | 6.178.978      | 8.404.756       | 73,52 | TSPSB      |
| 19  | Jawa Barat          | Kota Bandung          | 1.695.208      | 2.366.792       | 71,62 | TSPB       |
| 20  | Jawa Barat          | Kota Bekasi           | 1.318.796      | 1.846.856       | 71,41 | TSPB       |
| 21  | Jawa Barat          | Kota Bogor            | 621.486        | 876.038         | 70,94 | TSPB       |
| 22  | Jawa Barat          | Kota Cirebon          | 228.826        | 338.500         | 67,60 | TSPC       |
| 23  | Jawa Barat          | Kota Sukabumi         | 227.472        | 323.606         | 70,29 | TSPB       |
| 24  | Jawa Tengah         | Kota Pekalongan       | 177.126        | 269.588         | 65,70 | TSPC       |
| 25  | Jawa Tengah         | Kota Semarang         | 1.185.296      | 1.646.492       | 71,99 | TSPSB      |
| 26  | Jawa Tengah         | Kota Tegal            | 177.126        | 264.018         | 67,09 | TSPC       |
| 27  | Jawa Tengah         | Kota Surakarta        | 368.734        | 541.404         | 68,11 | TSPC       |
| 28  | DI. Yogyakarta      | Kota Yogyakarta       | 273.315        | 340.347         | 80,30 | TSPSB      |
| 29  | Jawa Timur          | Kota Kediri           | 202.020        | 251.160         | 80,43 | TSPSB      |
| 30  | Jawa Timur          | Kota Malang           | 624.624        | 812.448         | 76,88 | TSPSB      |
| 31  | Jawa Timur          | Kota Mojokerto        | 114.660        | 152.880         | 75,00 | TSPSB      |
| 32  | Jawa Timur          | Kota Probolinggo      | 98.280         | 140.868         | 69,77 | TSPB       |
| 33  | Jawa Timur          | Kota Surabaya         | 2.020.200      | 2.664.480       | 75,82 | TSPSB      |
| 34  | Jawa Timur          | Kota Madiun           | 89.544         | 127.764         | 70,09 | TSPB       |
| 35  | Bali                | Kota Denpasar         | 498.802        | 682.280         | 73,11 | TSPSB      |
| 36  | Kalimantan Timur    | Kota Balikpapan       | 281.340        | 398.044         | 70,68 | TSPB       |
| 37  | Kalimantan Timur    | Kota Samarinda        | 392.798        | 559.556         | 70,20 | TSPB       |
| 38  | Sulawesi Utara      | Kota Bitung           | 123.492        | 174.660         | 70,70 | TSPB       |
| 39  | Sulawesi Utara      | Kota Manado           | 276.504        | 375.396         | 73,66 | TSPSB      |
| 40  | Gorontalo           | Kota Gorontalo        | 115.698        | 176.676         | 65,49 | TSPC       |
| 41  | Sulawesi Tenggara   | Kota Kendari          | 145.900        | 208.403         | 70,01 | TSPB       |
| 42  | Sulawesi Selatan    | Kota Pare-Pare        | 80.699         | 129.438         | 62,35 | TSPK       |
| 43  | Nusa Tenggara Barat | Kota Mataram          | 224.448        | 324.648         | 69,14 | TSPC       |
| 44  | Nusa Tenggara Timur | Kota Kupang           | 168.444        | 263.737         | 63,87 | TSPK       |

Sumber : Susenas Kor 2002, BPS Pusat

**Keterangan :**

**TSP** : Tenaga Kerja - Ketersediaan - Usia Produktif

Dibelakang **TSP** - **ST** : Sangat Tinggi

**T** : Tinggi

**SD** : Sedang

**R** : Rendah

**SR** : Sangat Rendah

|           |       |       |       |       |
|-----------|-------|-------|-------|-------|
| Rata-rata | 67,03 |       |       |       |
| Standev   | 4,72  |       |       |       |
| Median    | 67,33 |       |       |       |
|           |       |       |       |       |
| TSPSB     | 71,76 |       | 72,06 |       |
| TSPB      | 69,39 | 71,76 | 69,70 | 72,06 |
| TSPC      | 64,67 | 69,39 | 64,97 | 69,70 |
| TSPK      | 64,67 | 62,31 | 64,97 | 62,61 |
| TSPSK     | 62,31 |       | 62,61 |       |



Lampiran 4.3.3.1.2.A. Indikator Tenaga Kerja Berijasah SLTP Berpengalaman

| No. | Propinsi         | Kabupaten                  | Total<br>Tenaga Kerja | Tenaga Kerja<br>Minimal SLTP | Rasio | Intensitas |
|-----|------------------|----------------------------|-----------------------|------------------------------|-------|------------|
| 1   | Sumatera Utara   | Kab. Asahan                | 416.079               | 156.845                      | 37,70 | TSSC       |
| 2   | Sumatera Utara   | Kab. Dairi                 | 189.034               | 109.253                      | 57,80 | TSSB       |
| 3   | Sumatera Utara   | Kab. Deli Serdang          | 766.088               | 459.678                      | 60,00 | TSSB       |
| 4   | Sumatera Utara   | Kab. Langkat               | 331.744               | 197.668                      | 59,58 | TSSB       |
| 5   | Sumatera Utara   | Kab. Simalungun            | 328.345               | 186.591                      | 56,83 | TSSB       |
| 6   | Sumatera Utara   | Kab. Tanah Karo            | 161.484               | 99.956                       | 61,90 | TSSSB      |
| 7   | Sumatera Utara   | Kab. Labuhan Batu          | 419.799               | 157.110                      | 37,43 | TSSC       |
| 8   | Sumatera Utara   | Kab. Tapanuli Utara        | 289.851               | 161.768                      | 55,81 | TSSB       |
| 9   | Sumatera Barat   | Kab. Pesisir Selatan       | 118.608               | 48.208                       | 40,64 | TSSC       |
| 10  | Sumatera Barat   | Kab. Sawah Lunto Sijunjung | 135.488               | 44.968                       | 33,19 | TSSC       |
| 11  | Sumatera Barat   | Kab. Pasaman               | 252.352               | 88.228                       | 34,96 | TSSC       |
| 12  | Sumatera Barat   | Kab. Solok                 | 180.456               | 63.072                       | 34,95 | TSSC       |
| 13  | Riau             | Kab. Bengkalis             | 203.023               | 81.836                       | 40,31 | TSSC       |
| 14  | Riau             | Kab. Indragiri Hilir       | 137.603               | 43.773                       | 31,81 | TSSK       |
| 15  | Riau             | Kab. Kampar                | 122.014               | 69.128                       | 56,66 | TSSB       |
| 16  | Riau             | Kab. Kuantan Singingi      | 217.733               | 94.779                       | 43,53 | TSSC       |
| 17  | Riau             | Kab. Pelalawan             | 30.708                | -                            |       |            |
| 18  | Riau             | Kab. Rokan Hulu            | 194.502               | 50.188                       | 25,80 | TSSK       |
| 19  | Jambi            | Kab. Batanghari            | 88.869                | 31.878                       | 35,87 | TSSC       |
| 20  | Jambi            | Kab. Bungo                 | 99.312                | 42.087                       | 42,38 | TSSC       |
| 21  | Jambi            | Kab. Kerinci               | 152.430               | 56.358                       | 36,97 | TSSC       |
| 22  | Jambi            | Kab. Tanjung Jabung Timur  | 70.812                | 17.757                       | 25,08 | TSSK       |
| 23  | Jambi            | Kab. Tebo                  | 103.062               | 33.582                       | 32,58 | TSSC       |
| 24  | Sumatera Selatan | Kab. Muara Enim            | 415.912               | 108.217                      | 26,02 | TSSK       |
| 25  | Sumatera Selatan | Kab. Musi Banyuasin        | 643.198               | 196.400                      | 30,53 | TSSK       |
| 26  | Sumatera Selatan | Kab. Musi Rawas            | 344.146               | 108.313                      | 31,47 | TSSK       |
| 27  | Sumatera Selatan | Kab. Ogan Kemiling Ilir    | 423.725               | 91.039                       | 21,49 | TSSSK      |
| 28  | Sumatera Selatan | Kab. Lahat                 | 265.484               | 65.191                       | 24,56 | TSSK       |
| 29  | Bangka Belitung  | Kab. Bangka                | 267.738               | 56.860                       | 21,24 | TSSSK      |
| 30  | Bangka Belitung  | Kab. Belitung              | 76.210                | 25.066                       | 32,89 | TSSC       |
| 31  | Bengkulu         | Kab. Bengkulu Selatan      | 161.064               | 87.591                       | 54,38 | TSSB       |
| 32  | Lampung          | Kab. Lampung Barat         | 197.538               | 72.270                       | 36,59 | TSSC       |
| 33  | Lampung          | Kab. Lampung Selatan       | 502.139               | 127.083                      | 25,31 | TSSK       |
| 34  | Lampung          | Kab. Lampung Timur         | 470.338               | 162.272                      | 34,50 | TSSC       |
| 35  | Lampung          | Kab. Lampung Utara         | 209.990               | 79.035                       | 37,64 | TSSC       |
| 36  | Jawa Barat       | Kab. Bandung               | 1.673.144             | 772.038                      | 46,14 | TSSC       |
| 37  | Lampung          | Kab. Way Kanan             | 160.600               | 53.801                       | 33,50 | TSSC       |
| 38  | Banten           | Kab. Lebak                 | 435.024               | 62.328                       | 14,33 | TSSSK      |
| 39  | Banten           | Kab. Serang                | 648.144               | 190.804                      | 29,44 | TSSK       |
| 40  | Banten           | Kab. Tangerang             | 980.784               | 499.572                      | 50,94 | TSSC       |
| 41  | Jawa Barat       | Kab. Bekasi                | 725.881               | 363.636                      | 50,10 | TSSC       |
| 42  | Jawa Barat       | Kab. Bogor                 | 1.226.533             | 437.938                      | 35,71 | TSSC       |
| 43  | Jawa Barat       | Kab. Ciamis                | 744.556               | 121.948                      | 16,38 | TSSSK      |
| 44  | Jawa Barat       | Kab. Cianjur               | 861.340               | 114.838                      | 13,33 | TSSSK      |
| 45  | Jawa Barat       | Kab. Cirebon               | 564.458               | 152.834                      | 27,08 | TSSK       |
| 46  | Jawa Barat       | Kab. Garut                 | 776.079               | 168.873                      | 21,76 | TSSSK      |
| 47  | Jawa Barat       | Kab. Indramayu             | 695.978               | 138.323                      | 19,87 | TSSSK      |
| 48  | Jawa Barat       | Kab. Karawang              | 710.573               | 176.446                      | 24,83 | TSSK       |
| 49  | Jawa Barat       | Kab. Kuningan              | 381.543               | 82.553                       | 21,64 | TSSSK      |
| 50  | Jawa Barat       | Kab. Purwakarta            | 329.200               | 106.206                      | 32,26 | TSSC       |
| 51  | Jawa Barat       | Kab. Sukabumi              | 810.269               | 172.978                      | 21,35 | TSSSK      |
| 52  | Jawa Barat       | Kab. Sumedang              | 349.047               | 112.681                      | 32,28 | TSSC       |
| 53  | Jawa Barat       | Kab. Tasikmalaya           | 974.910               | 247.026                      | 25,34 | TSSK       |
| 54  | Jawa Barat       | Kab. Subang                | 617.233               | 160.157                      | 25,95 | TSSK       |
| 55  | Jawa Tengah      | Kab. Kendal                | 493.502               | 142.592                      | 28,89 | TSSK       |
| 56  | Jawa Tengah      | Kab. Magelang              | 543.632               | 208.318                      | 38,32 | TSSC       |

| No. | Propinsi           | Kabupaten                | Total<br>Tenaga Kerja | Tenaga Kerja<br>Minimal SLTP | Rasio | Intensitas |
|-----|--------------------|--------------------------|-----------------------|------------------------------|-------|------------|
| 57  | Jawa Tengah        | Kab. Pekalongan          | 477.906               | 92.462                       | 19,35 | TSSSK      |
| 58  | Jawa Tengah        | Kab. Pemalang            | 435.574               | 110.286                      | 25,32 | TSSK       |
| 59  | Jawa Tengah        | Kab. Sukoharjo           | 414.408               | 194.950                      | 47,04 | TSSC       |
| 60  | Jawa Tengah        | Kab. Tegal               | 532.492               | 100.260                      | 18,83 | TSSSK      |
| 61  | Jawa Tengah        | Kab. Banyumas            | 645.006               | 218.344                      | 33,85 | TSSC       |
| 62  | Jawa Tengah        | Kab. Boyolali            | 471.222               | 178.240                      | 37,83 | TSSC       |
| 63  | Jawa Tengah        | Kab. Cilacap             | 719.644               | 213.888                      | 29,72 | TSSK       |
| 64  | Jawa Tengah        | Kab. Jepara              | 445.600               | 153.732                      | 34,50 | TSSC       |
| 65  | Jawa Tengah        | Kab. Karanganyar         | 397.698               | 125.882                      | 31,65 | TSSK       |
| 66  | Jawa Tengah        | Kab. Klaten              | 562.570               | 262.904                      | 46,73 | TSSC       |
| 67  | Jawa Tengah        | Kab. Kudus               | 442.258               | 182.696                      | 41,31 | TSSC       |
| 68  | Jawa Tengah        | Kab. Kebumen             | 614.928               | 170.442                      | 27,72 | TSSK       |
| 69  | DI. Yogyakarta     | Kab. Bantul              | 437.959               | 183.825                      | 41,97 | TSSC       |
| 70  | DI. Yogyakarta     | Kab. Gunung Kidul        | 400.042               | 98.344                       | 24,58 | TSSK       |
| 71  | Jawa Timur         | Kab. Bangkalan           | 325.185               | 42.924                       | 13,20 | TSSSK      |
| 72  | Jawa Timur         | Kab. Banyuwangi          | 753.984               | 237.468                      | 31,50 | TSSK       |
| 73  | Jawa Timur         | Kab. Blitar              | 516.474               | 148.071                      | 28,67 | TSSK       |
| 74  | Jawa Timur         | Kab. Kediri              | 734.475               | 245.889                      | 33,48 | TSSC       |
| 75  | Jawa Timur         | Kab. Magetan             | 320.901               | 136.584                      | 42,56 | TSSC       |
| 76  | Jawa Timur         | Kab. Mojokerto           | 433.566               | 150.927                      | 34,81 | TSSC       |
| 77  | Jawa Timur         | Kab. Pamekasan           | 393.981               | 90.930                       | 23,08 | TSSK       |
| 78  | Jawa Timur         | Kab. Pasuruan            | 763.224               | 225.561                      | 29,55 | TSSK       |
| 79  | Jawa Timur         | Kab. Sidoarjo            | 783.027               | 474.789                      | 60,64 | TSSSB      |
| 80  | Jawa Timur         | Kab. Bondowoso           | 338.247               | 44.331                       | 13,11 | TSSSK      |
| 81  | Jawa Timur         | Kab. Gresik              | 463.596               | 197.946                      | 42,70 | TSSC       |
| 82  | Jawa Timur         | Kab. Jember              | 989.415               | 251.055                      | 25,37 | TSSK       |
| 83  | Jawa Timur         | Kab. Jombang             | 512.379               | 204.582                      | 39,93 | TSSC       |
| 84  | Jawa Timur         | Kab. Lamongan            | 587.475               | 197.568                      | 33,63 | TSSC       |
| 85  | Jawa Timur         | Kab. Ponorogo            | 484.953               | 142.212                      | 29,32 | TSSK       |
| 86  | Jawa Timur         | Kab. Tulungagung         | 469.308               | 177.198                      | 37,76 | TSSC       |
| 87  | Bali               | Kab. Badung              | 178.856               | 108.556                      | 60,69 | TSSSB      |
| 88  | Bali               | Kab. Bangli              | 134.683               | 41.850                       | 31,07 | TSSK       |
| 89  | Bali               | Kab. Buleleng            | 271.131               | 106.743                      | 39,37 | TSSC       |
| 90  | Bali               | Kab. Gianyar             | 219.088               | 94.546                       | 43,15 | TSSC       |
| 91  | Bali               | Kab. Jembrana            | 129.141               | 44.363                       | 34,35 | TSSC       |
| 92  | Bali               | Kab. Tabanan             | 225.406               | 113.138                      | 50,19 | TSSC       |
| 93  | Bali               | Kab. Karangasem          | 209.211               | 43.063                       | 20,58 | TSSSK      |
| 94  | Kalimantan Barat   | Kab. Kapuas Hulu         | 113.880               | 43.216                       | 37,95 | TSSC       |
| 95  | Kalimantan Barat   | Kab. Ketapang            | 229.257               | 70.568                       | 30,78 | TSSK       |
| 96  | Kalimantan Barat   | Kab. Pontianak           | 358.128               | 126.492                      | 35,32 | TSSC       |
| 97  | Kalimantan Barat   | Kab. Sambas              | 203.242               | 57.377                       | 28,23 | TSSK       |
| 98  | Kalimantan Barat   | Kab. Sanggau             | 231.848               | 46.720                       | 20,15 | TSSSK      |
| 99  | Kalimantan Tengah  | Kab. Barito Selatan      | 94.908                | 51.329                       | 54,08 | TSSB       |
| 100 | Kalimantan Tengah  | Kab. Barito Utara        | 58.626                | 20.960                       | 35,75 | TSSC       |
| 101 | Kalimantan Tengah  | Kab. Kapuas              | 271.369               | 107.387                      | 39,57 | TSSC       |
| 102 | Kalimantan Selatan | Kab. Hulu Sungai Selatan | 107.792               | 28.939                       | 26,85 | TSSK       |
| 103 | Kalimantan Selatan | Kab. Hulu Sungai Tengah  | 118.571               | 41.420                       | 34,93 | TSSC       |
| 104 | Kalimantan Selatan | Kab. Hulu Sungai Utara   | 129.563               | 22.084                       | 17,04 | TSSSK      |
| 105 | Kalimantan Selatan | Kab. Tabalong            | 96.197                | 43.262                       | 44,97 | TSSC       |
| 106 | Kalimantan Selatan | Kab. Tanah Laut          | 152.683               | 36.770                       | 24,08 | TSSK       |
| 107 | Kalimantan Selatan | Kab. Tapin               | 61.116                | 13.427                       | 21,97 | TSSSK      |
| 108 | Kalimantan Timur   | Kab. Berau               | 70.031                | 28.633                       | 40,89 | TSSC       |
| 109 | Kalimantan Timur   | Kab. Kutai               | 162.324               | 81.136                       | 49,98 | TSSC       |
| 110 | Kalimantan Timur   | Kab. Pasir               | 114.131               | 43.281                       | 37,92 | TSSC       |
| 111 | Kalimantan Timur   | Kab. Bulungan            | 59.045                | 19.508                       | 33,04 | TSSC       |
| 112 | Kalimantan Timur   | Kab. Kutai Timur         | 37.252                | 32.027                       | 85,97 | TSSSB      |

| No. | Propinsi            | Kabupaten                 | Total<br>Tenaga Kerja | Tenaga Kerja<br>Minimal SLTP | Rasio | Intensitas |
|-----|---------------------|---------------------------|-----------------------|------------------------------|-------|------------|
| 113 | Kalimantan Timur    | Kab. Nunukan              | 40.572                | 18.228                       | 44,93 | TSSC       |
| 114 | Sulawesi Utara      | Kab. Minahasa             | 309.299               | 165.492                      | 53,51 | TSSB       |
| 115 | Sulawesi Utara      | Kab. Sangihe              | 116.467               | 36.890                       | 31,67 | TSSK       |
| 116 | Gorontalo           | Kab. Gorontalo            | 168.222               | 35.904                       | 21,34 | TSSSK      |
| 117 | Sulawesi Tengah     | Kab. Banggai              | 148.251               | 56.622                       | 38,19 | TSSC       |
| 118 | Sulawesi Tengah     | Kab. Toli-Toli            | 60.177                | 25.629                       | 42,59 | TSSC       |
| 119 | Sulawesi Tengah     | Kab. Donggala             | 392.460               | 131.676                      | 33,55 | TSSC       |
| 120 | Sulawesi Tengah     | Kab. Morowali             | 78.729                | 17.115                       | 21,74 | TSSSK      |
| 121 | Sulawesi Tengah     | Kab. Poso                 | 80.685                | 35.208                       | 43,64 | TSSC       |
| 122 | Sulawesi Tenggara   | Kab. Buton                | 219.805               | 77.540                       | 35,28 | TSSC       |
| 123 | Sulawesi Tenggara   | Kab. Kolaka               | 162.126               | 53.638                       | 33,08 | TSSC       |
| 124 | Sulawesi Selatan    | Kab. Luwu                 | 126.754               | 64.163                       | 50,62 | TSSC       |
| 125 | Sulawesi Selatan    | Kab. Majene               | 56.364                | 17.080                       | 30,30 | TSSK       |
| 126 | Sulawesi Selatan    | Kab. Pangkep              | 112.728               | 38.430                       | 34,09 | TSSC       |
| 127 | Sulawesi Selatan    | Kab. Pinrang              | 124.661               | 56.781                       | 45,55 | TSSC       |
| 128 | Sulawesi Selatan    | Kab. Tana Toraja          | 162.677               | 66.945                       | 41,15 | TSSC       |
| 129 | Sulawesi Selatan    | Kab. Bantaeng             | 94.386                | 29.369                       | 31,12 | TSSK       |
| 130 | Sulawesi Selatan    | Kab. Barru                | 30.744                | 12.810                       | 41,67 | TSSC       |
| 131 | Sulawesi Selatan    | Kab. Bone                 | 293.698               | 56.448                       | 19,22 | TSSSK      |
| 132 | Sulawesi Selatan    | Kab. Enrekang             | 105.042               | 35.014                       | 33,33 | TSSC       |
| 133 | Sulawesi Selatan    | Kab. Gowa                 | 187.058               | 66.175                       | 35,38 | TSSC       |
| 134 | Sulawesi Selatan    | Kab. Jeneponto            | 112.728               | 35.014                       | 31,06 | TSSK       |
| 135 | Sulawesi Selatan    | Kab. Luwu Utara           | 203.252               | 79.422                       | 39,08 | TSSC       |
| 136 | Sulawesi Selatan    | Kab. Maros                | 129.950               | 59.094                       | 45,47 | TSSC       |
| 137 | Sulawesi Selatan    | Kab. Selayar              | 40.992                | 4.270                        | 10,42 | TSSSK      |
| 138 | Sulawesi Selatan    | Kab. Sinjai               | 65.758                | 20.496                       | 31,17 | TSSK       |
| 139 | Sulawesi Selatan    | Kab. Takalar              | 87.108                | 29.890                       | 34,31 | TSSC       |
| 140 | Nusa Tenggara Barat | Kab. Bima                 | 237.213               | 113.544                      | 47,87 | TSSC       |
| 141 | Nusa Tenggara Barat | Kab. Lombok Barat         | 310.766               | 70.897                       | 22,81 | TSSSK      |
| 142 | Nusa Tenggara Barat | Kab. Dompu                | 123.894               | 54.378                       | 43,89 | TSSC       |
| 143 | Nusa Tenggara Barat | Kab. Lombok Timur         | 449.420               | 121.267                      | 26,98 | TSSK       |
| 144 | Nusa Tenggara Timur | Kab. Ende                 | 131.197               | 34.479                       | 26,28 | TSSK       |
| 145 | Nusa Tenggara Timur | Kab. Flores Timur         | 108.732               | 30.996                       | 28,51 | TSSK       |
| 146 | Nusa Tenggara Timur | Kab. Timur Tengah Selatan | 132.348               | 14.760                       | 11,15 | TSSSK      |
| 147 | Nusa Tenggara Timur | Kab. Timur Tengah Utara   | 115.620               | 14.268                       | 12,34 | TSSSK      |
| 148 | Nusa Tenggara Timur | Kab. Belu                 | 129.474               | 26.150                       | 20,20 | TSSSK      |
| 149 | Nusa Tenggara Timur | Kab. Manggarai            | 297.913               | 54.371                       | 18,25 | TSSSK      |
| 150 | Nusa Tenggara Timur | Kab. Ngada                | 100.368               | 22.632                       | 22,55 | TSSSK      |
| 151 | Nusa Tenggara Timur | Kab. Sumba Barat          | 150.060               | 28.044                       | 18,69 | TSSSK      |
| 152 | Irian Jaya Barat    | Kab. Fak-Fak              | 29.948                | 19.220                       | 64,18 | TSSSB      |
| 153 | Irian Jaya Barat    | Kab. Manokwari            | 121.558               | 32.378                       | 26,64 | TSSK       |
| 154 | Irian Jaya Barat    | Kab. Sorong               | 98.638                | 24.734                       | 25,08 | TSSK       |
| 155 | Papua               | Kab. Jayawijaya           | 224.956               | 20.654                       | 9,18  | TSSSK      |
| 156 | Papua               | Kab. Mimika               | 20.264                | 11.920                       | 58,82 | TSSB       |

Sumber : Susenas Kor 2002, BPS Pusat

**Keterangan :**

**TSS** : Tenaga Kerja - Ketersediaan - Tenaga Kerja Berpendidikan SLTP

Dibelakang **TSS** - **SB** : Sangat Banyak

**B** : Banyak

**C** : Cukup

**K** : Kurang

**SK** : Sangat Kurang

|            |       |       |
|------------|-------|-------|
| Rata-rata  | 41,62 |       |
| Stand. Dev | 18,77 |       |
|            |       |       |
| TSSSB      | 60,40 |       |
| TSSB       | 51,01 | 60,40 |
| TSSC       | 32,24 | 51,01 |
| TSSK       | 32,24 | 22,85 |
| TSSSK      | 22,85 |       |

Lampiran 4.3.3.1.2.B. Indikator Tenaga Kerja Berijazah SLTP Berpengalaman

| No. | Propinsi            | Kota                  | Total<br>Tenaga Kerja | Tenaga Kerja<br>Minimal SLTP | Rasio | Intensitas |
|-----|---------------------|-----------------------|-----------------------|------------------------------|-------|------------|
| 1   | Sumatera Utara      | Kota Binjai           | 103.649               | 57.486                       | 55,46 | TSSB       |
| 2   | Sumatera Utara      | Kota Medan            | 675.896               | 580.957                      | 85,95 | TSSSB      |
| 3   | Sumatera Utara      | Kota Pematang Siantar | 99.294                | 71.422                       | 71,93 | TSSSB      |
| 4   | Sumatera Utara      | Kota Sibolga          | 47.905                | 23.517                       | 49,09 | TSSC       |
| 5   | Sumatera Utara      | Kota Tanjung Balai    | 37.453                | 33.969                       | 90,70 | TSSSB      |
| 6   | Sumatera Utara      | Kota Tebing Tinggi    | 47.905                | 24.388                       | 50,91 | TSSC       |
| 7   | Sumatera Barat      | Kota Padang           | 240.196               | 193.160                      | 80,42 | TSSSB      |
| 8   | Sumatera Barat      | Kota Sawahlunto       | 32.704                | 12.848                       | 39,29 | TSSC       |
| 9   | Riau                | Kota Batam            | 192.387               | 132.002                      | 68,61 | TSSSB      |
| 10  | Riau                | Kota Pekanbaru        | 388.344               | 328.033                      | 84,47 | TSSSB      |
| 11  | Riau                | Kota Dumai            |                       |                              |       |            |
| 12  | Sumatera Selatan    | Kota Palembang        | 478.956               | 322.172                      | 67,27 | TSSSB      |
| 13  | Bangka Belitung     | Kota Pangkal Pinang   | 56.924                | 34.048                       | 59,81 | TSSB       |
| 14  | Bengkulu            | Kota Bengkulu         | 92.250                | 73.800                       | 80,00 | TSSSB      |
| 15  | Lampung             | Kota Bandar Lampung   | 294.712               | 208.692                      | 70,81 | TSSSB      |
| 16  | Banten              | Kota Tangerang        | 604.488               | 453.932                      | 75,09 | TSSSB      |
| 17  | Banten              | Kota Cilegon          | 166.484               | 91.948                       | 55,23 | TSSB       |
| 18  | DKI Jakarta         | Kota DKI Jakarta      | 3.267.526             | 2.520.344                    | 77,13 | TSSSB      |
| 19  | Jawa Barat          | Kota Bandung          | 851.666               | 648.566                      | 76,15 | TSSSB      |
| 20  | Jawa Barat          | Kota Bekasi           | 644.504               | 479.316                      | 74,37 | TSSSB      |
| 21  | Jawa Barat          | Kota Bogor            | 293.818               | 196.330                      | 66,82 | TSSSB      |
| 22  | Jawa Barat          | Kota Cirebon          | 116.444               | 78.532                       | 67,44 | TSSSB      |
| 23  | Jawa Barat          | Kota Sukabumi         | 90.718                | 58.222                       | 64,18 | TSSSB      |
| 24  | Jawa Tengah         | Kota Pekalongan       | 98.032                | 49.016                       | 50,00 | TSSC       |
| 25  | Jawa Tengah         | Kota Semarang         | 700.706               | 454.512                      | 64,86 | TSSSB      |
| 26  | Jawa Tengah         | Kota Tegal            | 119.198               | 50.130                       | 42,06 | TSSC       |
| 27  | Jawa Tengah         | Kota Surakarta        | 232.826               | 128.110                      | 55,02 | TSSB       |
| 28  | DI. Yogyakarta      | Kota Yogyakarta       | 137.256               | 100.149                      | 72,97 | TSSSB      |
| 29  | Jawa Timur          | Kota Kediri           | 125.580               | 99.372                       | 79,13 | TSSSB      |
| 30  | Jawa Timur          | Kota Malang           | 354.900               | 246.792                      | 69,54 | TSSSB      |
| 31  | Jawa Timur          | Kota Mojokerto        | 72.072                | 38.220                       | 53,03 | TSSB       |
| 32  | Jawa Timur          | Kota Probolinggo      | 55.692                | 24.024                       | 43,14 | TSSC       |
| 33  | Jawa Timur          | Kota Surabaya         | 1.176.084             | 869.232                      | 73,91 | TSSSB      |
| 34  | Jawa Timur          | Kota Madiun           | 44.772                | 38.220                       | 85,37 | TSSSB      |
| 35  | Bali                | Kota Denpasar         | 336.069               | 248.940                      | 74,07 | TSSSB      |
| 36  | Kalimantan Timur    | Kota Balikpapan       | 140.149               | 108.889                      | 77,70 | TSSSB      |
| 37  | Kalimantan Timur    | Kota Samarinda        | 212.725               | 150.376                      | 70,69 | TSSSB      |
| 38  | Sulawesi Utara      | Kota Bitung           | 62.976                | 40.344                       | 64,06 | TSSSB      |
| 39  | Sulawesi Utara      | Kota Manado           | 136.776               | 114.636                      | 83,81 | TSSSB      |
| 40  | Gorontalo           | Kota Gorontalo        | 46.302                | 25.998                       | 56,15 | TSSB       |
| 41  | Sulawesi Tenggara   | Kota Kendari          | 56.086                | 45.288                       | 80,75 | TSSSB      |
| 42  | Sulawesi Selatan    | Kota Pare-Pare        | 37.553                | 31.161                       | 82,98 | TSSSB      |
| 43  | Nusa Tenggara Barat | Kota Mataram          | 116.232               | 64.128                       | 55,17 | TSSB       |
| 44  | Nusa Tenggara Timur | Kota Kupang           | 102.813               | 74.695                       | 72,65 | TSSSB      |

Sumber : Susenas Kor 2002, BPS Pusat

**Keterangan :**

**TSS** : Tenaga Kerja - Ketersediaan - Tenaga Kerja Berpendidikan SLTP

Dibelakang **TSS** - **SB** : Sangat Banyak

**B** : Banyak

**C** : Cukup

**K** : Kurang

**SK** : Sangat Kurang

|            |       |       |
|------------|-------|-------|
| Rata-rata  | 41,62 |       |
| Stand. Dev | 18,77 |       |
|            |       |       |
| TSSSB      | 60,40 |       |
| TSSB       | 51,01 | 60,40 |
| TSSC       | 32,24 | 51,01 |
| TSSK       | 32,24 | 22,85 |
| TSSSK      | 22,85 |       |

Lampiran 4.3.3.1.3.A. Indikator Rasio Pencari Kerja Terhadap Angkatan Kerja

| No. | Propinsi         | Kabupaten                  | Pencari Kerja | Angkatan Kerja | Rasio | Intensitas |
|-----|------------------|----------------------------|---------------|----------------|-------|------------|
| 1   | Sumatera Utara   | Kab. Asahan                | 38.977        | 455.056        | 8,57  | TSCC       |
| 2   | Sumatera Utara   | Kab. Dairi                 | 1.884         | 190.918        | 0,99  | TSCSK      |
| 3   | Sumatera Utara   | Kab. Deli Serdang          | 130.195       | 896.283        | 14,53 | TSCSB      |
| 4   | Sumatera Utara   | Kab. Langkat               | 74.186        | 405.930        | 18,28 | TSCSB      |
| 5   | Sumatera Utara   | Kab. Simalungun            | 49.514        | 377.859        | 13,10 | TSCB       |
| 6   | Sumatera Utara   | Kab. Tanah Karo            | 1.013         | 162.497        | 0,62  | TSCSK      |
| 7   | Sumatera Utara   | Kab. Labuhan Batu          | 28.667        | 448.466        | 6,39  | TSCC       |
| 8   | Sumatera Utara   | Kab. Tapanuli Utara        | 16.208        | 215.769        | 7,51  | TSCC       |
| 9   | Sumatera Barat   | Kab. Pesisir Selatan       | 21.464        | 140.072        | 15,32 | TSCSB      |
| 10  | Sumatera Barat   | Kab. Sawah Lunto Sijunjung | 5.840         | 141.328        | 4,13  | TSCK       |
| 11  | Sumatera Barat   | Kab. Pasaman               | 17.984        | 270.336        | 6,65  | TSCC       |
| 12  | Sumatera Barat   | Kab. Solok                 | 8.760         | 189.216        | 4,63  | TSCK       |
| 13  | Riau             | Kab. Bengkalis             | 29.594        | 232.617        | 12,72 | TSCB       |
| 14  | Riau             | Kab. Indragiri Hilir       | 6.824         | 144.427        | 4,72  | TSCK       |
| 15  | Riau             | Kab. Kampar                | 7.532         | 122.014        | 6,17  | TSCK       |
| 16  | Riau             | Kab. Kuantan Singingi      | 27.827        | 245.560        | 11,33 | TSCC       |
| 17  | Riau             | Kab. Pelalawan             | 0             | 30.708         |       |            |
| 18  | Riau             | Kab. Rokan Hulu            | 7.590         | 202.092        | 3,76  | TSCK       |
| 19  | Jambi            | Kab. Batanghari            | 7.754         | 88.869         | 8,73  | TSCC       |
| 20  | Jambi            | Kab. Bungo                 | 1.512         | 100.824        | 1,50  | TSCSK      |
| 21  | Jambi            | Kab. Kerinci               | 6.648         | 159.078        | 4,18  | TSCK       |
| 22  | Jambi            | Kab. Tanjung Jabung Timur  | 12.117        | 82.929         | 14,61 | TSCSB      |
| 23  | Jambi            | Kab. Tebo                  | 5.211         | 108.273        | 4,81  | TSCK       |
| 24  | Sumatera Selatan | Kab. Muara Enim            | 32.567        | 448.479        | 7,26  | TSCC       |
| 25  | Sumatera Selatan | Kab. Musi Banyuasin        | 22.018        | 665.216        | 3,31  | TSCSK      |
| 26  | Sumatera Selatan | Kab. Musi Rawas            | 38.318        | 382.464        | 10,02 | TSCC       |
| 27  | Sumatera Selatan | Kab. Ogan Kemiling Ilir    | 33.547        | 457.272        | 7,34  | TSCC       |
| 28  | Sumatera Selatan | Kab. Lahat                 | 22.986        | 288.470        | 7,97  | TSCC       |
| 29  | Bangka Belitung  | Kab. Bangka                | 7.202         | 274.940        | 2,62  | TSCSK      |
| 30  | Bangka Belitung  | Kab. Belitung              | 8.024         | 84.234         | 9,53  | TSCC       |
| 31  | Bengkulu         | Kab. Bengkulu Selatan      | 9.159         | 170.223        | 5,38  | TSCK       |
| 32  | Lampung          | Kab. Lampung Barat         | 10.439        | 207.977        | 5,02  | TSCK       |
| 33  | Lampung          | Kab. Lampung Selatan       | 62.887        | 565.026        | 11,13 | TSCC       |
| 34  | Lampung          | Kab. Lampung Timur         | 29.436        | 499.774        | 5,89  | TSCK       |
| 35  | Lampung          | Kab. Lampung Utara         | 19.052        | 229.042        | 8,32  | TSCC       |
| 36  | Jawa Barat       | Kab. Bandung               | 320.394       | 1.993.538      | 16,07 | TSCSB      |
| 37  | Lampung          | Kab. Way Kanan             | 4.818         | 165.418        | 2,91  | TSCSK      |
| 38  | Banten           | Kab. Lebak                 | 63.600        | 498.624        | 12,76 | TSCB       |
| 39  | Banten           | Kab. Serang                | 96.708        | 744.852        | 12,98 | TSCB       |
| 40  | Banten           | Kab. Tangerang             | 185.448       | 1.166.232      | 15,90 | TSCSB      |
| 41  | Jawa Barat       | Kab. Bekasi                | 113.695       | 839.576        | 13,54 | TSCB       |
| 42  | Jawa Barat       | Kab. Bogor                 | 235.557       | 1.462.090      | 16,11 | TSCSB      |
| 43  | Jawa Barat       | Kab. Ciamis                | 68.464        | 813.020        | 8,42  | TSCC       |
| 44  | Jawa Barat       | Kab. Cianjur               | 118.394       | 979.734        | 12,08 | TSCB       |
| 45  | Jawa Barat       | Kab. Cirebon               | 116.108       | 680.566        | 17,06 | TSCSB      |
| 46  | Jawa Barat       | Kab. Garut                 | 110.905       | 886.984        | 12,50 | TSCB       |
| 47  | Jawa Barat       | Kab. Indramayu             | 65.883        | 761.861        | 8,65  | TSCC       |
| 48  | Jawa Barat       | Kab. Karawang              | 126.983       | 837.556        | 15,16 | TSCSB      |
| 49  | Jawa Barat       | Kab. Kuningan              | 53.738        | 435.281        | 12,35 | TSCB       |
| 50  | Jawa Barat       | Kab. Purwakarta            | 35.501        | 364.701        | 9,73  | TSCC       |
| 51  | Jawa Barat       | Kab. Sukabumi              | 113.359       | 923.628        | 12,27 | TSCB       |
| 52  | Jawa Barat       | Kab. Sumedang              | 55.473        | 404.520        | 13,71 | TSCB       |
| 53  | Jawa Barat       | Kab. Tasikmalaya           | 109.381       | 1.084.291      | 10,09 | TSCC       |
| 54  | Jawa Barat       | Kab. Subang                | 48.322        | 665.555        | 7,26  | TSCC       |
| 55  | Jawa Tengah      | Kab. Kendal                | 16.710        | 510.212        | 3,28  | TSCSK      |
| 56  | Jawa Tengah      | Kab. Magelang              | 30.078        | 573.710        | 5,24  | TSCK       |

| No. | Propinsi           | Kabupaten                | Pencari Kerja | Angkatan Kerja | Rasio | Intensitas |
|-----|--------------------|--------------------------|---------------|----------------|-------|------------|
| 57  | Jawa Tengah        | Kab. Pekalongan          | 28.964        | 506.870        | 5,71  | TSCK       |
| 58  | Jawa Tengah        | Kab. Pemalang            | 28.964        | 464.538        | 6,24  | TSCK       |
| 59  | Jawa Tengah        | Kab. Sukoharjo           | 13.368        | 427.776        | 3,13  | TSCSK      |
| 60  | Jawa Tengah        | Kab. Tegal               | 76.866        | 609.358        | 12,61 | TSCB       |
| 61  | Jawa Tengah        | Kab. Banyumas            | 71.296        | 716.302        | 9,95  | TSCC       |
| 62  | Jawa Tengah        | Kab. Boyolali            | 17.824        | 489.046        | 3,64  | TSCK       |
| 63  | Jawa Tengah        | Kab. Cilacap             | 72.410        | 792.054        | 9,14  | TSCC       |
| 64  | Jawa Tengah        | Kab. Jepara              | 11.140        | 456.740        | 2,44  | TSCSK      |
| 65  | Jawa Tengah        | Kab. Karanganyar         | 18.938        | 416.636        | 4,55  | TSCK       |
| 66  | Jawa Tengah        | Kab. Klaten              | 36.762        | 599.332        | 6,13  | TSCK       |
| 67  | Jawa Tengah        | Kab. Kudus               | 27.850        | 470.108        | 5,92  | TSCK       |
| 68  | Jawa Tengah        | Kab. Kebumen             | 25.622        | 640.550        | 4,00  | TSCK       |
| 69  | DI. Yogyakarta     | Kab. Bantul              | 23.761        | 461.720        | 5,15  | TSCK       |
| 70  | DI. Yogyakarta     | Kab. Gunung Kidul        | 8.340         | 408.382        | 2,04  | TSCSK      |
| 71  | Jawa Timur         | Kab. Bangkalan           | 29.967        | 355.152        | 8,44  | TSCC       |
| 72  | Jawa Timur         | Kab. Banyuwangi          | 32.025        | 786.009        | 4,07  | TSCK       |
| 73  | Jawa Timur         | Kab. Blitar              | 27.657        | 544.131        | 5,08  | TSCK       |
| 74  | Jawa Timur         | Kab. Kediri              | 36.414        | 770.889        | 4,72  | TSCK       |
| 75  | Jawa Timur         | Kab. Magetan             | 27.510        | 348.411        | 7,90  | TSCC       |
| 76  | Jawa Timur         | Kab. Mojokerto           | 27.615        | 461.181        | 5,99  | TSCK       |
| 77  | Jawa Timur         | Kab. Pamekasan           | 16.569        | 410.550        | 4,04  | TSCK       |
| 78  | Jawa Timur         | Kab. Pasuruan            | 48.657        | 811.881        | 5,99  | TSCK       |
| 79  | Jawa Timur         | Kab. Sidoarjo            | 78.855        | 861.882        | 9,15  | TSCC       |
| 80  | Jawa Timur         | Kab. Bondowoso           | 6.636         | 344.883        | 1,92  | TSCSK      |
| 81  | Jawa Timur         | Kab. Gresik              | 41.769        | 505.365        | 8,27  | TSCC       |
| 82  | Jawa Timur         | Kab. Jember              | 61.593        | 1.051.008      | 5,86  | TSCK       |
| 83  | Jawa Timur         | Kab. Jombang             | 38.577        | 550.956        | 7,00  | TSCC       |
| 84  | Jawa Timur         | Kab. Lamongan            | 25.473        | 612.948        | 4,16  | TSCK       |
| 85  | Jawa Timur         | Kab. Ponorogo            | 39.984        | 524.937        | 7,62  | TSCC       |
| 86  | Jawa Timur         | Kab. Tulungagung         | 25.305        | 494.613        | 5,12  | TSCK       |
| 87  | Bali               | Kab. Badung              | 15.764        | 194.620        | 8,10  | TSCC       |
| 88  | Bali               | Kab. Bangli              | 1.227         | 135.910        | 0,90  | TSCSK      |
| 89  | Bali               | Kab. Buleleng            | 11.154        | 282.285        | 3,95  | TSCK       |
| 90  | Bali               | Kab. Gianyar             | 3.993         | 223.081        | 1,79  | TSCSK      |
| 91  | Bali               | Kab. Jembrana            | 7.518         | 136.659        | 5,50  | TSCK       |
| 92  | Bali               | Kab. Tabanan             | 6.752         | 232.158        | 2,91  | TSCSK      |
| 93  | Bali               | Kab. Karangasem          | 5.369         | 214.580        | 2,50  | TSCSK      |
| 94  | Kalimantan Barat   | Kab. Kapuas Hulu         | 6.424         | 120.304        | 5,34  | TSCK       |
| 95  | Kalimantan Barat   | Kab. Ketapang            | 36.517        | 265.774        | 13,74 | TSCB       |
| 96  | Kalimantan Barat   | Kab. Pontianak           | 37.936        | 396.064        | 9,58  | TSCC       |
| 97  | Kalimantan Barat   | Kab. Sambas              | 14.465        | 217.707        | 6,64  | TSCC       |
| 98  | Kalimantan Barat   | Kab. Sanggau             | 16.936        | 248.784        | 6,81  | TSCC       |
| 99  | Kalimantan Tengah  | Kab. Barito Selatan      | 6.172         | 101.080        | 6,11  | TSCK       |
| 100 | Kalimantan Tengah  | Kab. Barito Utara        | 553           | 59.179         | 0,93  | TSCSK      |
| 101 | Kalimantan Tengah  | Kab. Kapuas              | 16.768        | 288.137        | 5,82  | TSCK       |
| 102 | Kalimantan Selatan | Kab. Hulu Sungai Selatan | 7.358         | 115.150        | 6,39  | TSCC       |
| 103 | Kalimantan Selatan | Kab. Hulu Sungai Tengah  | 29.119        | 147.690        | 19,72 | TSCSB      |
| 104 | Kalimantan Selatan | Kab. Hulu Sungai Utara   | 7.348         | 136.911        | 5,37  | TSCK       |
| 105 | Kalimantan Selatan | Kab. Tabalong            | 2.728         | 98.925         | 2,76  | TSCSK      |
| 106 | Kalimantan Selatan | Kab. Tanah Laut          | 12.431        | 165.114        | 7,53  | TSCC       |
| 107 | Kalimantan Selatan | Kab. Tapin               | 3.241         | 64.357         | 5,04  | TSCK       |
| 108 | Kalimantan Timur   | Kab. Berau               | 4.957         | 74.988         | 6,61  | TSCC       |
| 109 | Kalimantan Timur   | Kab. Kutai               | 22.530        | 184.854        | 12,19 | TSCB       |
| 110 | Kalimantan Timur   | Kab. Pasir               | 7.510         | 121.641        | 6,17  | TSCK       |
| 111 | Kalimantan Timur   | Kab. Bulungan            | 5.344         | 64.389         | 8,30  | TSCC       |
| 112 | Kalimantan Timur   | Kab. Kutai Timur         | 588           | 37.840         | 1,55  | TSCSK      |

| No. | Propinsi            | Kabupaten                 | Pencari Kerja | Angkatan Kerja | Rasio | Intensitas |
|-----|---------------------|---------------------------|---------------|----------------|-------|------------|
| 113 | Kalimantan Timur    | Kab. Nunukan              | 1.176         | 41.748         | 2,82  | TSCSK      |
| 114 | Sulawesi Utara      | Kab. Minahasa             | 29.796        | 339.095        | 8,79  | TSCC       |
| 115 | Sulawesi Utara      | Kab. Sangihe              | 9.486         | 125.953        | 7,53  | TSCC       |
| 116 | Gorontalo           | Kab. Gorontalo            | 23.094        | 191.316        | 12,07 | TSCB       |
| 117 | Sulawesi Tengah     | Kab. Banggai              | 7.296         | 155.547        | 4,69  | TSCK       |
| 118 | Sulawesi Tengah     | Kab. Toli-Toli            | 7.032         | 67.209         | 10,46 | TSCC       |
| 119 | Sulawesi Tengah     | Kab. Donggala             | 43.152        | 435.612        | 9,91  | TSCC       |
| 120 | Sulawesi Tengah     | Kab. Morowali             | 4.890         | 83.619         | 5,85  | TSCK       |
| 121 | Sulawesi Tengah     | Kab. Poso                 | 5.868         | 86.553         | 6,78  | TSCC       |
| 122 | Sulawesi Tenggara   | Kab. Buton                | 22.528        | 242.333        | 9,30  | TSCC       |
| 123 | Sulawesi Tenggara   | Kab. Kolaka               | 8.111         | 170.237        | 4,76  | TSCK       |
| 124 | Sulawesi Selatan    | Kab. Luwu                 | 10.882        | 137.636        | 7,91  | TSCC       |
| 125 | Sulawesi Selatan    | Kab. Majene               | 1.981         | 56.364         | 3,51  | TSCSK      |
| 126 | Sulawesi Selatan    | Kab. Pangkep              | 21.350        | 134.078        | 15,92 | TSCSB      |
| 127 | Sulawesi Selatan    | Kab. Pinrang              | 13.334        | 137.995        | 9,66  | TSCC       |
| 128 | Sulawesi Selatan    | Kab. Tana Toraja          | 18.293        | 180.970        | 10,11 | TSCC       |
| 129 | Sulawesi Selatan    | Kab. Bantaeng             | 10.497        | 104.883        | 10,01 | TSCC       |
| 130 | Sulawesi Selatan    | Kab. Barru                | 13.664        | 44.408         | 30,77 | TSCSB      |
| 131 | Sulawesi Selatan    | Kab. Bone                 | 44.272        | 337.970        | 13,10 | TSCB       |
| 132 | Sulawesi Selatan    | Kab. Enrekang             | 7.686         | 112.728        | 6,82  | TSCC       |
| 133 | Sulawesi Selatan    | Kab. Gowa                 | 42.729        | 229.787        | 18,60 | TSCSB      |
| 134 | Sulawesi Selatan    | Kab. Jeneponto            | 5.124         | 117.852        | 4,35  | TSCK       |
| 135 | Sulawesi Selatan    | Kab. Luwu Utara           | 25.620        | 228.872        | 11,19 | TSCC       |
| 136 | Sulawesi Selatan    | Kab. Maros                | 16.805        | 146.755        | 11,45 | TSCC       |
| 137 | Sulawesi Selatan    | Kab. Selayar              | 4.270         | 45.262         | 9,43  | TSCC       |
| 138 | Sulawesi Selatan    | Kab. Sinjai               | 0             | 65.758         |       |            |
| 139 | Sulawesi Selatan    | Kab. Takalar              | 10.248        | 97.356         | 10,53 | TSCC       |
| 140 | Nusa Tenggara Barat | Kab. Bima                 | 20.111        | 257.324        | 7,82  | TSCC       |
| 141 | Nusa Tenggara Barat | Kab. Lombok Barat         | 10.632        | 321.398        | 3,31  | TSCSK      |
| 142 | Nusa Tenggara Barat | Kab. Dompu                | 9.573         | 133.467        | 7,17  | TSCC       |
| 143 | Nusa Tenggara Barat | Kab. Lombok Timur         | 31.244        | 480.664        | 6,50  | TSCC       |
| 144 | Nusa Tenggara Timur | Kab. Ende                 | 5.729         | 136.926        | 4,18  | TSCK       |
| 145 | Nusa Tenggara Timur | Kab. Flores Timur         | 2.460         | 111.192        | 2,21  | TSCSK      |
| 146 | Nusa Tenggara Timur | Kab. Timur Tengah Selatan | 3.444         | 135.792        | 2,54  | TSCSK      |
| 147 | Nusa Tenggara Timur | Kab. Timur Tengah Utara   | 492           | 116.112        | 0,42  | TSCSK      |
| 148 | Nusa Tenggara Timur | Kab. Belu                 | 5.202         | 134.676        | 3,86  | TSCK       |
| 149 | Nusa Tenggara Timur | Kab. Manggarai            | 11.073        | 308.986        | 3,58  | TSCSK      |
| 150 | Nusa Tenggara Timur | Kab. Ngada                | 1.968         | 102.336        | 1,92  | TSCSK      |
| 151 | Nusa Tenggara Timur | Kab. Sumba Barat          | 5.904         | 155.964        | 3,79  | TSCK       |
| 152 | Irian Jaya Barat    | Kab. Fak-Fak              | 1.882         | 31.830         | 5,91  | TSCK       |
| 153 | Irian Jaya Barat    | Kab. Manokwari            | 3.168         | 124.726        | 2,54  | TSCSK      |
| 154 | Irian Jaya Barat    | Kab. Sorong               | 4.768         | 103.406        | 4,61  | TSCK       |
| 155 | Papua               | Kab. Jayawijaya           | 4.226         | 229.182        | 1,84  | TSCSK      |
| 156 | Papua               | Kab. Mimika               | 3.576         | 23.840         | 15,00 | TSCSB      |

Sumber : Susenas Kor 2002, BPS Pusat

**Keterangan :**

**TSC** : Tenaga Kerja - Ketersediaan - Pencari Kerja

Dibelakang **TSC** - **SB** : Sangat Banyak

**B** : Banyak

**C** : Cukup

**K** : Kurang

**SK** : Sangat Kurang

|            |       |       |
|------------|-------|-------|
| Rata-Rata  | 9,09  |       |
| Stand. Dev | 5,43  |       |
|            |       |       |
| TSCSB      | 14,52 |       |
| TSCB       | 11,80 | 14,52 |
| TSCC       | 6,37  | 11,80 |
| TSCK       | 6,37  | 3,66  |
| TSCSK      | 3,66  |       |

Lampiran 4.3.3.1.3.B. Indikator Rasio Pencari Kerja Terhadap Angkatan Kerja

| No. | Propinsi            | Kota                  | Pencari Kerja | Angkatan Kerja | Rasio | Intensitas |
|-----|---------------------|-----------------------|---------------|----------------|-------|------------|
| 1   | Sumatera Utara      | Kota Binjai           | 7.839         | 111.488        | 7,03  | TSCC       |
| 2   | Sumatera Utara      | Kota Medan            | 143.715       | 819.611        | 17,53 | TSCSB      |
| 3   | Sumatera Utara      | Kota Pematang Siantar | 8.710         | 108.004        | 8,06  | TSCC       |
| 4   | Sumatera Utara      | Kota Sibolga          | 4.355         | 41.808         | 10,42 | TSCC       |
| 5   | Sumatera Utara      | Kota Tanjung Balai    | 10.452        | 58.357         | 17,91 | TSCSB      |
| 6   | Sumatera Utara      | Kota Tebing Tinggi    | 10.452        | 58.357         | 17,91 | TSCSB      |
| 7   | Sumatera Barat      | Kota Padang           | 57.892        | 298.088        | 19,42 | TSCSB      |
| 8   | Sumatera Barat      | Kota Sawahlunto       | 5.840         | 38.544         | 15,15 | TSCSB      |
| 9   | Riau                | Kota Batam            | 11.776        | 204.163        | 5,77  | TSCK       |
| 10  | Riau                | Kota Pekanbaru        | 60.311        | 448.655        | 13,44 | TSCB       |
| 11  | Riau                | Kota Dumai            |               |                |       |            |
| 12  | Sumatera Selatan    | Kota Palembang        | 81.260        | 560.216        | 14,51 | TSCSB      |
| 13  | Bangka Belitung     | Kota Pangkal Pinang   | 6.916         | 63.840         | 10,83 | TSCC       |
| 14  | Bengkulu            | Kota Bengkulu         | 12.915        | 105.165        | 12,28 | TSCB       |
| 15  | Lampung             | Kota Bandar Lampung   | 62.832        | 357.544        | 17,57 | TSCSB      |
| 16  | Banten              | Kota Tangerang        | 74.712        | 679.200        | 11,00 | TSCC       |
| 17  | Banten              | Kota Cilegon          | 42.712        | 209.196        | 20,42 | TSCSB      |
| 18  | DKI Jakarta         | Kota DKI Jakarta      | 549.356       | 3.816.882      | 14,39 | TSCB       |
| 19  | Jawa Barat          | Kota Bandung          | 151.648       | 1.003.314      | 15,11 | TSCSB      |
| 20  | Jawa Barat          | Kota Bekasi           | 81.240        | 725.744        | 11,19 | TSCC       |
| 21  | Jawa Barat          | Kota Bogor            | 75.824        | 369.642        | 20,51 | TSCSB      |
| 22  | Jawa Barat          | Kota Cirebon          | 27.080        | 143.524        | 18,87 | TSCSB      |
| 23  | Jawa Barat          | Kota Sukabumi         | 18.956        | 109.674        | 17,28 | TSCSB      |
| 24  | Jawa Tengah         | Kota Pekalongan       | 8.912         | 106.944        | 8,33  | TSCC       |
| 25  | Jawa Tengah         | Kota Semarang         | 93.576        | 794.282        | 11,78 | TSCB       |
| 26  | Jawa Tengah         | Kota Tegal            | 14.482        | 133.680        | 10,83 | TSCC       |
| 27  | Jawa Tengah         | Kota Surakarta        | 24.508        | 257.334        | 9,52  | TSCC       |
| 28  | DI. Yogyakarta      | Kota Yogyakarta       | 11.970        | 149.226        | 8,02  | TSCC       |
| 29  | Jawa Timur          | Kota Kediri           | 18.564        | 144.144        | 12,88 | TSCB       |
| 30  | Jawa Timur          | Kota Malang           | 41.496        | 396.396        | 10,47 | TSCC       |
| 31  | Jawa Timur          | Kota Mojokerto        | 13.104        | 85.176         | 15,38 | TSCSB      |
| 32  | Jawa Timur          | Kota Probolinggo      | 8.736         | 64.428         | 13,56 | TSCB       |
| 33  | Jawa Timur          | Kota Surabaya         | 114.660       | 1.290.744      | 8,88  | TSCC       |
| 34  | Jawa Timur          | Kota Madiun           | 12.012        | 56.784         | 21,15 | TSCSB      |
| 35  | Bali                | Kota Denpasar         | 31.348        | 367.417        | 8,53  | TSCC       |
| 36  | Kalimantan Timur    | Kota Balikpapan       | 43.243        | 183.392        | 23,58 | TSCSB      |
| 37  | Kalimantan Timur    | Kota Samarinda        | 29.124        | 241.849        | 12,04 | TSCB       |
| 38  | Sulawesi Utara      | Kota Bitung           | 16.728        | 79.704         | 20,99 | TSCSB      |
| 39  | Sulawesi Utara      | Kota Manado           | 24.600        | 161.376        | 15,24 | TSCSB      |
| 40  | Gorontalo           | Kota Gorontalo        | 17.652        | 63.954         | 27,60 | TSCSB      |
| 41  | Sulawesi Tenggara   | Kota Kendari          | 11.871        | 67.957         | 17,47 | TSCSB      |
| 42  | Sulawesi Selatan    | Kota Pare-Pare        | 7.990         | 45.543         | 17,54 | TSCSB      |
| 43  | Nusa Tenggara Barat | Kota Mataram          | 18.036        | 134.268        | 13,43 | TSCB       |
| 44  | Nusa Tenggara Timur | Kota Kupang           | 15.995        | 118.808        | 13,46 | TSCB       |

Sumber : Susenas Kor 2002, BPS Pusat

**Keterangan :**

**TSC** : Tenaga Kerja - Ketersediaan - Pencari Kerja

Dibelakang **TSC** - **SB** : Sangat Banyak

**B** : Banyak

**C** : Cukup

**K** : Kurang

**SK** : Sangat Kurang

|            |       |       |
|------------|-------|-------|
| Rata-Rata  | 9,09  |       |
| Stand. Dev | 5,43  |       |
|            |       |       |
| TSCSB      | 14,52 |       |
| TSCB       | 11,80 | 14,52 |
| TSCC       | 6,37  | 11,80 |
| TSCK       | 6,37  | 3,66  |
| TSCSK      | 3,66  |       |



Lampiran 4.3.3.2. Variabel Biaya Tenaga Kerja

Lampiran 4.3.3.2.1.A. Indikator Biaya Tenaga Kerja Berdasarkan Aturan Formal

| No. | Propinsi         | Kabupaten                  | UMP/K<br>2002 | UMP/K<br>2003 | Rata-rata<br>UMP/K 2003 | Intensitas |
|-----|------------------|----------------------------|---------------|---------------|-------------------------|------------|
| 1   | Sumatera Utara   | Kab. Asahan                | -             | 549.549       | 549.549                 | TBRST      |
| 2   | Sumatera Utara   | Kab. Dairi                 | -             | 549.549       | 549.549                 | TBRST      |
| 3   | Sumatera Utara   | Kab. Deli Serdang          | 510.400       | 549.549       | 549.549                 | TBRST      |
| 4   | Sumatera Utara   | Kab. Langkat               | 510.400       | 549.549       | 549.549                 | TBRST      |
| 5   | Sumatera Utara   | Kab. Simalungun            | 510.400       | 549.549       | 549.549                 | TBRST      |
| 6   | Sumatera Utara   | Kab. Tanah Karo            | -             | 549.549       | 549.549                 | TBRST      |
| 7   | Sumatera Utara   | Kab. Labuhan Batu          | -             | 549.549       | 549.549                 | TBRST      |
| 8   | Sumatera Utara   | Kab. Tapanuli Utara        | 501.120       | 549.549       | 549.549                 | TBRST      |
| 9   | Sumatera Barat   | Kab. Pesisir Selatan       | 385.000       | 435.000       | 435.000                 | TBRSD      |
| 10  | Sumatera Barat   | Kab. Sawah Lunto Sijunjung | 385.000       | 435.000       | 435.000                 | TBRSD      |
| 11  | Sumatera Barat   | Kab. Pasaman               | 385.000       | 435.000       | 435.000                 | TBRSD      |
| 12  | Sumatera Barat   | Kab. Solok                 | 385.000       | 435.000       | 435.000                 | TBRSD      |
| 13  | Riau             | Kab. Bengkalis             | 394.000       | 437.500       | 437.500                 | TBRSD      |
| 14  | Riau             | Kab. Indragiri Hilir       | 394.000       | 437.500       | 437.500                 | TBRSD      |
| 15  | Riau             | Kab. Kampar                | 394.000       | 437.500       | 437.500                 | TBRSD      |
| 16  | Riau             | Kab. Kuantan Singingi      | 394.000       | 437.500       | 437.500                 | TBRSD      |
| 17  | Riau             | Kab. Pelalawan             | 405.000       | 405.000       | 405.000                 | TBRSD      |
| 18  | Riau             | Kab. Rokan Hulu            | 394.000       | 437.500       | 437.500                 | TBRSD      |
| 19  | Jambi            | Kab. Batanghari            | 304.000       | 390.000       | 390.000                 | TBRR       |
| 20  | Jambi            | Kab. Bungo                 | 304.000       | 390.000       | 390.000                 | TBRR       |
| 21  | Jambi            | Kab. Kerinci               | 304.000       | 390.000       | 390.000                 | TBRR       |
| 22  | Jambi            | Kab. Tanjung Jabung Timur  | 304.000       | 390.000       | 390.000                 | TBRR       |
| 23  | Jambi            | Kab. Tebo                  | 304.000       | 390.000       | 390.000                 | TBRR       |
| 24  | Sumatera Selatan | Kab. Muara Enim            | 331.500       | 403.500       | 472.494                 | TBRSD      |
| 25  | Sumatera Selatan | Kab. Musi Banyuasin        | 331.500       | 403.500       | 472.494                 | TBRSD      |
| 26  | Sumatera Selatan | Kab. Musi Rawas            | 331.500       | 403.500       | 472.494                 | TBRSD      |
| 27  | Sumatera Selatan | Kab. Ogan Kemiling Ilir    | 331.500       | 403.500       | 472.494                 | TBRSD      |
| 28  | Sumatera Selatan | Kab. Lahat                 | 331.500       | 403.500       | 472.494                 | TBRSD      |
| 29  | Bangka Belitung  | Kab. Bangka                | -             | 393.254       | 393.254                 | TBRSD      |
| 30  | Bangka Belitung  | Kab. Belitung              | -             | 396.750       | 396.750                 | TBRSD      |
| 31  | Bengkulu         | Kab. Bengkulu Selatan      | 295.000       | 330.000       | 330.000                 | TBRSR      |
| 32  | Lampung          | Kab. Lampung Barat         | 310.000       | 350.000       | 350.000                 | TBRSR      |
| 33  | Lampung          | Kab. Lampung Selatan       | 310.000       | 350.000       | 350.000                 | TBRSR      |
| 34  | Lampung          | Kab. Lampung Timur         | 310.000       | 350.000       | 350.000                 | TBRSR      |
| 35  | Lampung          | Kab. Lampung Utara         | 310.000       | 350.000       | 350.000                 | TBRSR      |
| 36  | Jawa Barat       | Kab. Bandung               | 470.500       | 537.500       | 537.500                 | TBRST      |
| 37  | Lampung          | Kab. Way Kanan             | 310.000       | 350.000       | 350.000                 | TBRSR      |
| 38  | Banten           | Kab. Lebak                 | -             | 475.000       | 475.000                 | TBRT       |
| 39  | Banten           | Kab. Serang                | -             | 606.000       | 606.000                 | TBRST      |
| 40  | Banten           | Kab. Tangerang             | 590.000       | 628.675       | 628.675                 | TBRST      |
| 41  | Jawa Barat       | Kab. Bekasi                | 575.500       | 631.000       | 631.000                 | TBRST      |
| 42  | Jawa Barat       | Kab. Bogor                 | 576.169       | 600.944       | 600.944                 | TBRST      |
| 43  | Jawa Barat       | Kab. Ciamis                | 283.500       | 337.000       | 337.000                 | TBRSR      |
| 44  | Jawa Barat       | Kab. Cianjur               | 300.000       | 330.000       | 346.625                 | TBRSR      |
| 45  | Jawa Barat       | Kab. Cirebon               | 340.000       | 370.000       | 370.000                 | TBRR       |
| 46  | Jawa Barat       | Kab. Garut                 | 285.000       | 330.000       | 330.000                 | TBRSR      |
| 47  | Jawa Barat       | Kab. Indramayu             | 331.200       | 420.000       | 420.000                 | TBRSD      |
| 48  | Jawa Barat       | Kab. Karawang              | 530.015       | 585.000       | 585.000                 | TBRST      |
| 49  | Jawa Barat       | Kab. Kuningan              | 281.000       | 325.000       | 325.000                 | TBRSR      |
| 50  | Jawa Barat       | Kab. Purwakarta            | 485.000       | 524.000       | 524.000                 | TBRST      |
| 51  | Jawa Barat       | Kab. Sukabumi              | 281.000       | 321.000       | 352.365                 | TBRR       |
| 52  | Jawa Barat       | Kab. Sumedang              | 470.000       | 537.000       | 537.000                 | TBRST      |
| 53  | Jawa Barat       | Kab. Tasikmalaya           | 290.000       | 345.000       | 345.000                 | TBRSR      |
| 54  | Jawa Barat       | Kab. Subang                | 350.000       | 405.000       | 405.000                 | TBRSD      |
| 55  | Jawa Tengah      | Kab. Kendal                | 330.000       | 377.500       | 377.500                 | TBRR       |
| 56  | Jawa Tengah      | Kab. Magelang              | 320.200       | 362.000       | 362.000                 | TBRR       |

| No. | Propinsi           | Kabupaten                | UMP/K<br>2002 | UMP/K<br>2003 | Rata-rata<br>UMP/K 2003 | Intensitas |
|-----|--------------------|--------------------------|---------------|---------------|-------------------------|------------|
| 57  | Jawa Tengah        | Kab. Pekalongan          | 322.800       | 375.000       | 375.000                 | TBRR       |
| 58  | Jawa Tengah        | Kab. Pemalang            | 336.150       | 380.000       | 380.000                 | TBRR       |
| 59  | Jawa Tengah        | Kab. Sukoharjo           | 327.900       | 370.500       | 370.500                 | TBRR       |
| 60  | Jawa Tengah        | Kab. Tegal               | 321.700       | 365.000       | 365.000                 | TBRR       |
| 61  | Jawa Tengah        | Kab. Banyumas            | 324.000       | 372.600       | 372.600                 | TBRR       |
| 62  | Jawa Tengah        | Kab. Boyolali            | 316.500       | 357.500       | 357.500                 | TBRR       |
| 63  | Jawa Tengah        | Kab. Cilacap             | 321.700       | 360.000       | 360.000                 | TBRR       |
| 64  | Jawa Tengah        | Kab. Jepara              | 332.250       | 376.000       | 376.000                 | TBRR       |
| 65  | Jawa Tengah        | Kab. Karanganyar         | 328.100       | 375.000       | 375.000                 | TBRR       |
| 66  | Jawa Tengah        | Kab. Klaten              | 317.550       | 358.000       | 358.000                 | TBRR       |
| 67  | Jawa Tengah        | Kab. Kudus               | 336.250       | 384.000       | 384.000                 | TBRR       |
| 68  | Jawa Tengah        | Kab. Kebumen             | 324.300       | 348.800       | 348.800                 | TBRSR      |
| 69  | DI. Yogyakarta     | Kab. Bantul              | 321.750       | 360.000       | 360.000                 | TBRR       |
| 70  | DI. Yogyakarta     | Kab. Gunung Kidul        | 321.750       | 360.000       | 360.000                 | TBRR       |
| 71  | Jawa Timur         | Kab. Bangkalan           | 330.000       | 390.000       | 390.000                 | TBRR       |
| 72  | Jawa Timur         | Kab. Banyuwangi          | 267.500       | 319.400       | 319.400                 | TBRSR      |
| 73  | Jawa Timur         | Kab. Blitar              | 267.950       | 295.000       | 295.000                 | TBRSR      |
| 74  | Jawa Timur         | Kab. Kediri              | 361.250       | 415.000       | 415.000                 | TBRSD      |
| 75  | Jawa Timur         | Kab. Magetan             | 260.000       | 292.500       | 292.500                 | TBRSR      |
| 76  | Jawa Timur         | Kab. Mojokerto           | 443.000       | 497.100       | 497.100                 | TBRT       |
| 77  | Jawa Timur         | Kab. Pamekasan           | 300.000       | 400.000       | 400.000                 | TBRSD      |
| 78  | Jawa Timur         | Kab. Pasuruan            | 453.000       | 430.000       | 430.000                 | TBRSD      |
| 79  | Jawa Timur         | Kab. Sidoarjo            | 453.000       | 516.500       | 516.500                 | TBRST      |
| 80  | Jawa Timur         | Kab. Bondowoso           | 250.000       | 300.000       | 300.000                 | TBRSR      |
| 81  | Jawa Timur         | Kab. Gresik              | 453.000       | 516.500       | 516.500                 | TBRST      |
| 82  | Jawa Timur         | Kab. Jember              | 315.500       | 384.000       | 384.000                 | TBRR       |
| 83  | Jawa Timur         | Kab. Jombang             | 304.512       | 398.000       | 398.000                 | TBRSD      |
| 84  | Jawa Timur         | Kab. Lamongan            | 273.737       | 328.450       | 328.450                 | TBRSR      |
| 85  | Jawa Timur         | Kab. Ponorogo            | 252.000       | 282.000       | 282.000                 | TBRSR      |
| 86  | Jawa Timur         | Kab. Tulungagung         | 290.000       | 332.500       | 332.500                 | TBRSR      |
| 87  | Bali               | Kab. Badung              | 385.000       | 430.000       | 430.000                 | TBRSD      |
| 88  | Bali               | Kab. Bangli              | 341.000       | 410.000       | 410.000                 | TBRSD      |
| 89  | Bali               | Kab. Buleleng            | 341.000       | 410.000       | 410.000                 | TBRSD      |
| 90  | Bali               | Kab. Gianyar             | 345.000       | 423.000       | 423.000                 | TBRSD      |
| 91  | Bali               | Kab. Jembrana            | 341.000       | 417.500       | 417.500                 | TBRSD      |
| 92  | Bali               | Kab. Tabanan             | 341.000       | 410.000       | 410.000                 | TBRSD      |
| 93  | Bali               | Kab. Karangasem          | 341.000       | 410.000       | 410.000                 | TBRSD      |
| 94  | Kalimantan Barat   | Kab. Kapuas Hulu         | 380.000       | 400.000       | 400.000                 | TBRSD      |
| 95  | Kalimantan Barat   | Kab. Ketapang            | 380.000       | 400.000       | 400.000                 | TBRSD      |
| 96  | Kalimantan Barat   | Kab. Pontianak           | 380.000       | 400.000       | 400.000                 | TBRSD      |
| 97  | Kalimantan Barat   | Kab. Sambas              | 380.000       | 400.000       | 400.000                 | TBRSD      |
| 98  | Kalimantan Barat   | Kab. Sanggau             | 380.000       | 400.000       | 400.000                 | TBRSD      |
| 99  | Kalimantan Tengah  | Kab. Barito Selatan      | 362.000       | 425.000       | 452.763                 | TBRSD      |
| 100 | Kalimantan Tengah  | Kab. Barito Utara        | 362.000       | 425.000       | 425.000                 | TBRSD      |
| 101 | Kalimantan Tengah  | Kab. Kapuas              | 362.000       | 425.000       | 425.000                 | TBRSD      |
| 102 | Kalimantan Selatan | Kab. Hulu Sungai Selatan | 362.000       | 425.000       | 425.000                 | TBRSD      |
| 103 | Kalimantan Selatan | Kab. Hulu Sungai Tengah  | 362.000       | 425.000       | 425.000                 | TBRSD      |
| 104 | Kalimantan Selatan | Kab. Hulu Sungai Utara   | 362.000       | 425.000       | 425.000                 | TBRSD      |
| 105 | Kalimantan Selatan | Kab. Tabalong            | 377.500       | 425.000       | 459.172                 | TBRSD      |
| 106 | Kalimantan Selatan | Kab. Tanah Laut          | 377.500       | 425.000       | 425.000                 | TBRSD      |
| 107 | Kalimantan Selatan | Kab. Tapin               | 377.500       | 425.000       | 425.000                 | TBRSD      |
| 108 | Kalimantan Timur   | Kab. Berau               | 500.000       | 540.000       | 618.333                 | TBRST      |
| 109 | Kalimantan Timur   | Kab. Kutai               | 500.000       | 540.000       | 540.000                 | TBRST      |
| 110 | Kalimantan Timur   | Kab. Pasir               | 500.000       | 540.000       | 540.000                 | TBRST      |
| 111 | Kalimantan Timur   | Kab. Bulungan            | 500.000       | 540.000       | 540.000                 | TBRST      |
| 112 | Kalimantan Timur   | Kab. Kutai Timur         | 500.000       | 540.000       | 540.000                 | TBRST      |

| No. | Propinsi            | Kabupaten                 | UMP/K<br>2002 | UMP/K<br>2003 | Rata-rata<br>UMP/K 2003 | Intensitas |
|-----|---------------------|---------------------------|---------------|---------------|-------------------------|------------|
| 113 | Kalimantan Timur    | Kab. Nunukan              | 500.000       | 540.000       | 540.000                 | TBRST      |
| 114 | Sulawesi Utara      | Kab. Minahasa             | 438.000       | 495.000       | 495.000                 | TBRT       |
| 115 | Sulawesi Utara      | Kab. Sangihe              | 438.000       | 495.000       | 495.000                 | TBRT       |
| 116 | Gorontalo           | Kab. Gorontalo            | 375.000       | 410.000       | 410.000                 | TBRSD      |
| 117 | Sulawesi Tengah     | Kab. Banggai              | 350.000       | 410.000       | 410.000                 | TBRSD      |
| 118 | Sulawesi Tengah     | Kab. Toli-Toli            | 350.000       | 410.000       | 410.000                 | TBRSD      |
| 119 | Sulawesi Tengah     | Kab. Donggala             | 350.000       | 410.000       | 410.000                 | TBRSD      |
| 120 | Sulawesi Tengah     | Kab. Morowali             | 350.000       | 410.000       | 410.000                 | TBRSD      |
| 121 | Sulawesi Tengah     | Kab. Poso                 | 350.000       | 410.000       | 410.000                 | TBRSD      |
| 122 | Sulawesi Tenggara   | Kab. Buton                | 375.000       | 415.000       | 405.000                 | TBRSD      |
| 123 | Sulawesi Tenggara   | Kab. Kolaka               | 375.000       | 415.000       | 405.000                 | TBRSD      |
| 124 | Sulawesi Selatan    | Kab. Luwu                 | 375.000       | 415.000       | 415.000                 | TBRSD      |
| 125 | Sulawesi Selatan    | Kab. Majene               | 375.000       | 415.000       | 415.000                 | TBRSD      |
| 126 | Sulawesi Selatan    | Kab. Pangkep              | 375.000       | 415.000       | 415.000                 | TBRSD      |
| 127 | Sulawesi Selatan    | Kab. Pinrang              | 375.000       | 415.000       | 415.000                 | TBRSD      |
| 128 | Sulawesi Selatan    | Kab. Tana Toraja          | 375.000       | 415.000       | 415.000                 | TBRSD      |
| 129 | Sulawesi Selatan    | Kab. Bantaeng             | 375.000       | 415.000       | 415.000                 | TBRSD      |
| 130 | Sulawesi Selatan    | Kab. Barru                | 375.000       | 415.000       | 415.000                 | TBRSD      |
| 131 | Sulawesi Selatan    | Kab. Bone                 | 375.000       | 415.000       | 415.000                 | TBRSD      |
| 132 | Sulawesi Selatan    | Kab. Enrekang             | 375.000       | 415.000       | 415.000                 | TBRSD      |
| 133 | Sulawesi Selatan    | Kab. Gowa                 | 375.000       | 415.000       | 415.000                 | TBRSD      |
| 134 | Sulawesi Selatan    | Kab. Jeneponto            | 375.000       | 415.000       | 415.000                 | TBRSD      |
| 135 | Sulawesi Selatan    | Kab. Luwu Utara           | 375.000       | 415.000       | 415.000                 | TBRSD      |
| 136 | Sulawesi Selatan    | Kab. Maros                | 375.000       | 415.000       | 415.000                 | TBRSD      |
| 137 | Sulawesi Selatan    | Kab. Selayar              | 375.000       | 415.000       | 415.000                 | TBRSD      |
| 138 | Sulawesi Selatan    | Kab. Sinjai               | 375.000       | 415.000       | 415.000                 | TBRSD      |
| 139 | Sulawesi Selatan    | Kab. Takalar              | 375.000       | 415.000       | 415.000                 | TBRSD      |
| 140 | Nusa Tenggara Barat | Kab. Bima                 | 320.000       | 375.000       | 375.000                 | TBRR       |
| 141 | Nusa Tenggara Barat | Kab. Lombok Barat         | 320.000       | 375.000       | 375.000                 | TBRR       |
| 142 | Nusa Tenggara Barat | Kab. Dompu                | 320.000       | 375.000       | 375.000                 | TBRR       |
| 143 | Nusa Tenggara Barat | Kab. Lombok Timur         | 320.000       | 375.000       | 375.000                 | TBRR       |
| 144 | Nusa Tenggara Timur | Kab. Ende                 | 330.000       | -             | 330.000                 | TBRSR      |
| 145 | Nusa Tenggara Timur | Kab. Flores Timur         | 330.000       | -             | 330.000                 | TBRSR      |
| 146 | Nusa Tenggara Timur | Kab. Timur Tengah Selatan | 330.000       | -             | 330.000                 | TBRSR      |
| 147 | Nusa Tenggara Timur | Kab. Timur Tengah Utara   | 330.000       | -             | 330.000                 | TBRSR      |
| 148 | Nusa Tenggara Timur | Kab. Belu                 | 330.000       | -             | 330.000                 | TBRSR      |
| 149 | Nusa Tenggara Timur | Kab. Manggarai            | 330.000       | -             | 330.000                 | TBRSR      |
| 150 | Nusa Tenggara Timur | Kab. Ngada                | 330.000       | -             | 330.000                 | TBRSR      |
| 151 | Nusa Tenggara Timur | Kab. Sumba Barat          | 330.000       | -             | 330.000                 | TBRSR      |
| 152 | Irian Jaya Barat    | Kab. Fak-Fak              | 530.000       | -             | 530.000                 | TBRST      |
| 153 | Irian Jaya Barat    | Kab. Manokwari            | 530.000       | -             | 530.000                 | TBRST      |
| 154 | Irian Jaya Barat    | Kab. Sorong               | 530.000       | -             | 530.000                 | TBRST      |
| 155 | Papua               | Kab. Jayawijaya           | 530.000       | -             | 530.000                 | TBRST      |
| 156 | Papua               | Kab. Mimika               | 530.000       | -             | 530.000                 | TBRST      |

**Keterangan :**

**TBR** : Tenaga Kerja - Biaya Tenaga Kerja - Biaya Formal

Dibelakang **TBR** - **ST** : Sangat Tinggi

**T** : Tinggi

**SD** : Sedang

**R** : Rendah

**SR** : Sangat Rendah

|            |         |         |
|------------|---------|---------|
| Rata-rata  | 433.258 |         |
| Stand. Dev | 81.446  |         |
|            |         |         |
| TBRST      | 514.704 |         |
| TBRT       | 473.981 | 514.704 |
| TBRSD      | 392.535 | 473.981 |
| TBRR       | 392.535 | 351.812 |
| TBRSR      | 351.812 |         |

Lampiran 4.3.3.2.1.B. Indikator Biaya Tenaga Kerja Berdasarkan Aturan Formal

| No. | Propinsi            | Kota                  | UMP/K<br>2002 | UMP/K<br>2003 | Rata-rata<br>UMP/K 2003 | Intensitas |
|-----|---------------------|-----------------------|---------------|---------------|-------------------------|------------|
| 1   | Sumatera Utara      | Kota Binjai           | 487.200       | 549.549       | 549.549                 | TBRST      |
| 2   | Sumatera Utara      | Kota Medan            | 510.400       | 549.549       | 549.549                 | TBRST      |
| 3   | Sumatera Utara      | Kota Pematang Siantar | 496.480       | 549.549       | 549.549                 | TBRST      |
| 4   | Sumatera Utara      | Kota Sibolga          | 510.400       | 549.549       | 549.549                 | TBRST      |
| 5   | Sumatera Utara      | Kota Tanjung Balai    | 496.480       | 549.549       | 549.549                 | TBRST      |
| 6   | Sumatera Utara      | Kota Tebing Tinggi    | 491.840       | 535.300       | 549.549                 | TBRST      |
| 7   | Sumatera Barat      | Kota Padang           | 385.000       | 435.000       | 435.000                 | TBRSD      |
| 8   | Sumatera Barat      | Kota Sawahlunto       | 385.000       | 435.000       | 435.000                 | TBRSD      |
| 9   | Riau                | Kota Batam            | -             | 555.000       | 621.667                 | TBRST      |
| 10  | Riau                | Kota Pekanbaru        | 394.000       | 437.500       | 437.500                 | TBRSD      |
| 11  | Riau                | Kota Dumai            | 394.000       | 437.500       | 437.500                 | TBRSD      |
| 12  | Sumatera Selatan    | Kota Palembang        | 331.500       | 403.500       | 472.494                 | TBRSD      |
| 13  | Bangka Belitung     | Kota Pangkal Pinang   | -             | 405.272       | 405.272                 | TBRSD      |
| 14  | Bengkulu            | Kota Bengkulu         | 295.000       | 330.000       | 330.000                 | TBRSR      |
| 15  | Lampung             | Kota Bandar Lampung   | 310.000       | 350.000       | 350.000                 | TBRSR      |
| 16  | Banten              | Kota Tangerang        | 590.000       | 628.675       | 628.675                 | TBRST      |
| 17  | Banten              | Kota Cilegon          | -             | 635.000       | 635.000                 | TBRST      |
| 18  | DKI Jakarta         | Kota DKI Jakarta      | 591.266       | 631.554       | 631.554                 | TBRST      |
| 19  | Jawa Barat          | Kota Bandung          | 471.000       | 538.000       | 538.000                 | TBRST      |
| 20  | Jawa Barat          | Kota Bekasi           | 575.500       | 631.000       | 631.000                 | TBRST      |
| 21  | Jawa Barat          | Kota Bogor            | 576.169       | 576.169       | 576.169                 | TBRST      |
| 22  | Jawa Barat          | Kota Cirebon          | 315.000       | 375.000       | 375.000                 | TBRR       |
| 23  | Jawa Barat          | Kota Sukabumi         | 310.000       | 395.500       | 395.500                 | TBRSD      |
| 24  | Jawa Tengah         | Kota Pekalongan       | 332.850       | 375.000       | 375.000                 | TBRR       |
| 25  | Jawa Tengah         | Kota Semarang         | 343.250       | 400.000       | 400.000                 | TBRSD      |
| 26  | Jawa Tengah         | Kota Tegal            | 326.900       | 364.000       | 364.000                 | TBRR       |
| 27  | Jawa Tengah         | Kota Surakarta        | 333.300       | 378.000       | 378.000                 | TBRR       |
| 28  | DI. Yogyakarta      | Kota Yogyakarta       | 321.750       | 360.000       | 360.000                 | TBRR       |
| 29  | Jawa Timur          | Kota Kediri           | 361.250       | 415.000       | 415.000                 | TBRSD      |
| 30  | Jawa Timur          | Kota Malang           | 443.000       | 497.100       | 497.100                 | TBRT       |
| 31  | Jawa Timur          | Kota Mojokerto        | 415.000       | 478.500       | 478.500                 | TBRT       |
| 32  | Jawa Timur          | Kota Probolinggo      | 400.000       | 445.000       | 445.000                 | TBRSD      |
| 33  | Jawa Timur          | Kota Surabaya         | 453.200       | 516.750       | 516.750                 | TBRST      |
| 34  | Jawa Timur          | Kota Madiun           | 260.000       | 305.000       | 305.000                 | TBRSR      |
| 35  | Bali                | Kota Denpasar         | 385.000       | 427.500       | 427.500                 | TBRSD      |
| 36  | Kalimantan Timur    | Kota Balikpapan       | 500.000       | 540.000       | 540.000                 | TBRST      |
| 37  | Kalimantan Timur    | Kota Samarinda        | 500.000       | 540.000       | 540.000                 | TBRST      |
| 38  | Sulawesi Utara      | Kota Bitung           | 438.000       | 495.000       | 495.000                 | TBRT       |
| 39  | Sulawesi Utara      | Kota Manado           | 438.000       | 495.000       | 495.000                 | TBRT       |
| 40  | Gorontalo           | Kota Gorontalo        | 375.000       | 410.000       | 410.000                 | TBRSD      |
| 41  | Sulawesi Tenggara   | Kota Kendari          | 375.000       | 415.000       | 405.000                 | TBRSD      |
| 42  | Sulawesi Selatan    | Kota Pare-Pare        | 375.000       | 415.000       | 415.000                 | TBRSD      |
| 43  | Nusa Tenggara Barat | Kota Mataram          | 320.000       | 375.000       | 375.000                 | TBRR       |
| 44  | Nusa Tenggara Timur | Kota Kupang           | 330.000       | -             | 330.000                 | TBRSR      |

**Keterangan :**

**TBR** : Tenaga Kerja - Biaya Tenaga Kerja - Biaya Formal

Dibelakang **TBR** - **ST** : Sangat Tinggi

**T** : Tinggi

**SD** : Sedang

**R** : Rendah

**SR** : Sangat Rendah

|            |         |         |
|------------|---------|---------|
| Rata-rata  | 433.258 |         |
| Stand. Dev | 81.446  |         |
|            |         |         |
| TBRST      | 514.704 |         |
| TBRT       | 473.981 | 514.704 |
| TBRSD      | 392.535 | 473.981 |
| TBRR       | 392.535 | 351.812 |
| TBRSR      | 351.812 |         |

Lampiran 4.3.3.2.2.A. Indikator Biaya Tenaga Kerja Aktual

| No. | Propinsi         | Kabupaten                  | Rata-Rata Upah<br>Tenaga Kerja | Intensitas |
|-----|------------------|----------------------------|--------------------------------|------------|
| 1   | Sumatera Utara   | Kab. Asahan                | 534.241                        | TBDR       |
| 2   | Sumatera Utara   | Kab. Dairi                 | 396.021                        | TBDSR      |
| 3   | Sumatera Utara   | Kab. Deli Serdang          | 628.436                        | TBDSD      |
| 4   | Sumatera Utara   | Kab. Langkat               | 757.476                        | TBDSD      |
| 5   | Sumatera Utara   | Kab. Simalungun            | 567.503                        | TBDSD      |
| 6   | Sumatera Utara   | Kab. Tanah Karo            | 629.273                        | TBDSD      |
| 7   | Sumatera Utara   | Kab. Labuhan Batu          | 565.238                        | TBDSD      |
| 8   | Sumatera Utara   | Kab. Tapanuli Utara        | 756.040                        | TBDSD      |
| 9   | Sumatera Barat   | Kab. Pesisir Selatan       | 740.510                        | TBDSD      |
| 10  | Sumatera Barat   | Kab. Sawah Lunto Sijunjung | 656.508                        | TBDSD      |
| 11  | Sumatera Barat   | Kab. Pasaman               | 442.234                        | TBDSR      |
| 12  | Sumatera Barat   | Kab. Solok                 | 595.909                        | TBDSD      |
| 13  | Riau             | Kab. Bengkalis             | 765.977                        | TBDSD      |
| 14  | Riau             | Kab. Indragiri Hilir       | 1.101.269                      | TBDST      |
| 15  | Riau             | Kab. Kampar                | 1.302.388                      | TBDST      |
| 16  | Riau             | Kab. Kuantan Singingi      | 741.085                        | TBDSD      |
| 17  | Riau             | Kab. Pelalawan             |                                |            |
| 18  | Riau             | Kab. Rokan Hulu            | 774.719                        | TBDSD      |
| 19  | Jambi            | Kab. Batanghari            | 592.057                        | TBDSD      |
| 20  | Jambi            | Kab. Bungo                 | 527.656                        | TBDR       |
| 21  | Jambi            | Kab. Kerinci               | 494.978                        | TBDR       |
| 22  | Jambi            | Kab. Tanjung Jabung Timur  | 774.722                        | TBDSD      |
| 23  | Jambi            | Kab. Tebo                  | 566.881                        | TBDSD      |
| 24  | Sumatera Selatan | Kab. Muara Enim            | 733.395                        | TBDSD      |
| 25  | Sumatera Selatan | Kab. Musi Banyuasin        | 535.138                        | TBDR       |
| 26  | Sumatera Selatan | Kab. Musi Rawas            | 605.418                        | TBDSD      |
| 27  | Sumatera Selatan | Kab. Ogan Kemiling Ilir    | 533.509                        | TBDR       |
| 28  | Sumatera Selatan | Kab. Lahat                 | 414.919                        | TBDSR      |
| 29  | Bangka Belitung  | Kab. Bangka                | 761.989                        | TBDSD      |
| 30  | Bangka Belitung  | Kab. Belitung              | 396.036                        | TBDSR      |
| 31  | Bengkulu         | Kab. Bengkulu Selatan      | 549.784                        | TBDR       |
| 32  | Lampung          | Kab. Lampung Barat         | 501.111                        | TBDR       |
| 33  | Lampung          | Kab. Lampung Selatan       | 550.754                        | TBDR       |
| 34  | Lampung          | Kab. Lampung Timur         | 634.808                        | TBDSD      |
| 35  | Lampung          | Kab. Lampung Utara         | 582.171                        | TBDSD      |
| 36  | Jawa Barat       | Kab. Bandung               | 724.798                        | TBDSD      |
| 37  | Lampung          | Kab. Way Kanan             | 561.281                        | TBDSD      |
| 38  | Banten           | Kab. Lebak                 | 467.571                        | TBDR       |
| 39  | Banten           | Kab. Serang                | 627.816                        | TBDSD      |
| 40  | Banten           | Kab. Tangerang             | 764.928                        | TBDSD      |
| 41  | Jawa Barat       | Kab. Bekasi                | 731.960                        | TBDSD      |
| 42  | Jawa Barat       | Kab. Bogor                 | 698.264                        | TBDSD      |
| 43  | Jawa Barat       | Kab. Ciamis                | 405.505                        | TBDSR      |
| 44  | Jawa Barat       | Kab. Cianjur               | 426.255                        | TBDSR      |
| 45  | Jawa Barat       | Kab. Cirebon               | 627.695                        | TBDSD      |
| 46  | Jawa Barat       | Kab. Garut                 | 548.554                        | TBDR       |
| 47  | Jawa Barat       | Kab. Indramayu             | 693.406                        | TBDSD      |
| 48  | Jawa Barat       | Kab. Karawang              | 731.820                        | TBDSD      |
| 49  | Jawa Barat       | Kab. Kuningan              | 467.056                        | TBDR       |
| 50  | Jawa Barat       | Kab. Purwakarta            | 879.761                        | TBDT       |
| 51  | Jawa Barat       | Kab. Sukabumi              | 494.275                        | TBDR       |
| 52  | Jawa Barat       | Kab. Sumedang              | 695.973                        | TBDSD      |
| 53  | Jawa Barat       | Kab. Tasikmalaya           | 479.003                        | TBDR       |
| 54  | Jawa Barat       | Kab. Subang                | 411.953                        | TBDSR      |
| 55  | Jawa Tengah      | Kab. Kendal                | 532.479                        | TBDR       |
| 56  | Jawa Tengah      | Kab. Magelang              | 444.096                        | TBDR       |

| No. | Propinsi           | Kabupaten                | Rata-Rata Upah<br>Tenaga Kerja | Intensitas |
|-----|--------------------|--------------------------|--------------------------------|------------|
| 57  | Jawa Tengah        | Kab. Pekalongan          | 632.657                        | TBDS       |
| 58  | Jawa Tengah        | Kab. Pemalang            | 466.898                        | TBDR       |
| 59  | Jawa Tengah        | Kab. Sukoharjo           | 549.617                        | TBDR       |
| 60  | Jawa Tengah        | Kab. Tegal               | 453.446                        | TBDR       |
| 61  | Jawa Tengah        | Kab. Banyumas            | 526.106                        | TBDR       |
| 62  | Jawa Tengah        | Kab. Boyolali            | 511.230                        | TBDR       |
| 63  | Jawa Tengah        | Kab. Cilacap             | 824.130                        | TBDT       |
| 64  | Jawa Tengah        | Kab. Jepara              | 527.636                        | TBDR       |
| 65  | Jawa Tengah        | Kab. Karanganyar         | 454.148                        | TBDR       |
| 66  | Jawa Tengah        | Kab. Klaten              | 717.227                        | TBDS       |
| 67  | Jawa Tengah        | Kab. Kudus               | 502.056                        | TBDR       |
| 68  | Jawa Tengah        | Kab. Kebumen             | 452.198                        | TBDR       |
| 69  | DI. Yogyakarta     | Kab. Bantul              | 482.848                        | TBDR       |
| 70  | DI. Yogyakarta     | Kab. Gunung Kidul        | 451.005                        | TBDR       |
| 71  | Jawa Timur         | Kab. Bangkalan           | 529.756                        | TBDR       |
| 72  | Jawa Timur         | Kab. Banyuwangi          | 370.399                        | TBDS       |
| 73  | Jawa Timur         | Kab. Blitar              | 403.443                        | TBDS       |
| 74  | Jawa Timur         | Kab. Kediri              | 548.982                        | TBDR       |
| 75  | Jawa Timur         | Kab. Magetan             | 768.446                        | TBDS       |
| 76  | Jawa Timur         | Kab. Mojokerto           | 574.296                        | TBDS       |
| 77  | Jawa Timur         | Kab. Pamekasan           | 454.321                        | TBDR       |
| 78  | Jawa Timur         | Kab. Pasuruan            | 460.010                        | TBDR       |
| 79  | Jawa Timur         | Kab. Sidoarjo            | 766.859                        | TBDS       |
| 80  | Jawa Timur         | Kab. Bondowoso           | 277.109                        | TBDS       |
| 81  | Jawa Timur         | Kab. Gresik              | 553.408                        | TBDR       |
| 82  | Jawa Timur         | Kab. Jember              | 495.096                        | TBDR       |
| 83  | Jawa Timur         | Kab. Jombang             | 537.588                        | TBDR       |
| 84  | Jawa Timur         | Kab. Lamongan            | 468.712                        | TBDR       |
| 85  | Jawa Timur         | Kab. Ponorogo            | 431.290                        | TBDS       |
| 86  | Jawa Timur         | Kab. Tulungagung         | 453.954                        | TBDR       |
| 87  | Bali               | Kab. Badung              | 684.704                        | TBDS       |
| 88  | Bali               | Kab. Bangli              | 614.459                        | TBDS       |
| 89  | Bali               | Kab. Buleleng            | 632.985                        | TBDS       |
| 90  | Bali               | Kab. Gianyar             | 511.559                        | TBDR       |
| 91  | Bali               | Kab. Jembrana            | 568.229                        | TBDS       |
| 92  | Bali               | Kab. Tabanan             | 674.888                        | TBDS       |
| 93  | Bali               | Kab. Karangasem          | 621.044                        | TBDS       |
| 94  | Kalimantan Barat   | Kab. Kapuas Hulu         | 857.292                        | TBDT       |
| 95  | Kalimantan Barat   | Kab. Ketapang            | 735.687                        | TBDS       |
| 96  | Kalimantan Barat   | Kab. Pontianak           | 708.450                        | TBDS       |
| 97  | Kalimantan Barat   | Kab. Sambas              | 574.867                        | TBDS       |
| 98  | Kalimantan Barat   | Kab. Sanggau             | 729.815                        | TBDS       |
| 99  | Kalimantan Tengah  | Kab. Barito Selatan      | 716.922                        | TBDS       |
| 100 | Kalimantan Tengah  | Kab. Barito Utara        | 1.356.154                      | TBDST      |
| 101 | Kalimantan Tengah  | Kab. Kapuas              | 763.024                        | TBDS       |
| 102 | Kalimantan Selatan | Kab. Hulu Sungai Selatan | 666.663                        | TBDS       |
| 103 | Kalimantan Selatan | Kab. Hulu Sungai Tengah  | 510.555                        | TBDR       |
| 104 | Kalimantan Selatan | Kab. Hulu Sungai Utara   | 408.770                        | TBDS       |
| 105 | Kalimantan Selatan | Kab. Tabalong            | 826.341                        | TBDT       |
| 106 | Kalimantan Selatan | Kab. Tanah Laut          | 613.729                        | TBDS       |
| 107 | Kalimantan Selatan | Kab. Tapin               | 408.333                        | TBDS       |
| 108 | Kalimantan Timur   | Kab. Berau               | 1.136.125                      | TBDST      |
| 109 | Kalimantan Timur   | Kab. Kutai               | 935.114                        | TBDST      |
| 110 | Kalimantan Timur   | Kab. Pasir               | 858.558                        | TBDT       |
| 111 | Kalimantan Timur   | Kab. Bulungan            | 773.351                        | TBDS       |
| 112 | Kalimantan Timur   | Kab. Kutai Timur         | 1.710.993                      | TBDST      |

| No. | Propinsi            | Kabupaten                 | Rata-Rata Upah<br>Tenaga Kerja | Intensitas |
|-----|---------------------|---------------------------|--------------------------------|------------|
| 113 | Kalimantan Timur    | Kab. Nunukan              | 639.929                        | TBDSD      |
| 114 | Sulawesi Utara      | Kab. Minahasa             | 766.292                        | TBDSD      |
| 115 | Sulawesi Utara      | Kab. Sangihe              | 604.611                        | TBDSD      |
| 116 | Gorontalo           | Kab. Gorontalo            | 436.577                        | TBDSR      |
| 117 | Sulawesi Tengah     | Kab. Banggai              | 454.150                        | TBDR       |
| 118 | Sulawesi Tengah     | Kab. Toli-Toli            | 794.270                        | TBDT       |
| 119 | Sulawesi Tengah     | Kab. Donggala             | 549.393                        | TBDR       |
| 120 | Sulawesi Tengah     | Kab. Morowali             | 481.200                        | TBDR       |
| 121 | Sulawesi Tengah     | Kab. Poso                 | 513.885                        | TBDR       |
| 122 | Sulawesi Tenggara   | Kab. Buton                | 573.206                        | TBDSD      |
| 123 | Sulawesi Tenggara   | Kab. Kolaka               | 616.363                        | TBDSD      |
| 124 | Sulawesi Selatan    | Kab. Luwu                 | 529.752                        | TBDR       |
| 125 | Sulawesi Selatan    | Kab. Majene               | 415.200                        | TBDSR      |
| 126 | Sulawesi Selatan    | Kab. Pangkep              | 904.490                        | TBDST      |
| 127 | Sulawesi Selatan    | Kab. Pinrang              | 933.904                        | TBDST      |
| 128 | Sulawesi Selatan    | Kab. Tana Toraja          | 584.822                        | TBDSD      |
| 129 | Sulawesi Selatan    | Kab. Bantaeng             | 511.594                        | TBDR       |
| 130 | Sulawesi Selatan    | Kab. Barru                | 593.833                        | TBDSD      |
| 131 | Sulawesi Selatan    | Kab. Bone                 | 689.635                        | TBDSD      |
| 132 | Sulawesi Selatan    | Kab. Enrekang             | 1.072.143                      | TBDST      |
| 133 | Sulawesi Selatan    | Kab. Gowa                 | 740.479                        | TBDSD      |
| 134 | Sulawesi Selatan    | Kab. Jeneponto            | 546.783                        | TBDR       |
| 135 | Sulawesi Selatan    | Kab. Luwu Utara           | 526.290                        | TBDR       |
| 136 | Sulawesi Selatan    | Kab. Maros                | 821.447                        | TBDT       |
| 137 | Sulawesi Selatan    | Kab. Selayar              | 305.556                        | TBDSR      |
| 138 | Sulawesi Selatan    | Kab. Sinjai               | 448.333                        | TBDR       |
| 139 | Sulawesi Selatan    | Kab. Takalar              | 417.741                        | TBDSR      |
| 140 | Nusa Tenggara Barat | Kab. Bima                 | 529.222                        | TBDR       |
| 141 | Nusa Tenggara Barat | Kab. Lombok Barat         | 496.475                        | TBDR       |
| 142 | Nusa Tenggara Barat | Kab. Dompu                | 535.703                        | TBDR       |
| 143 | Nusa Tenggara Barat | Kab. Lombok Timur         | 338.986                        | TBDSR      |
| 144 | Nusa Tenggara Timur | Kab. Ende                 | 621.727                        | TBDSD      |
| 145 | Nusa Tenggara Timur | Kab. Flores Timur         | 656.175                        | TBDSD      |
| 146 | Nusa Tenggara Timur | Kab. Timur Tengah Selatan | 1.347.450                      | TBDST      |
| 147 | Nusa Tenggara Timur | Kab. Timur Tengah Utara   | 403.513                        | TBDSR      |
| 148 | Nusa Tenggara Timur | Kab. Belu                 | 741.934                        | TBDSD      |
| 149 | Nusa Tenggara Timur | Kab. Manggarai            | 580.931                        | TBDSD      |
| 150 | Nusa Tenggara Timur | Kab. Ngada                | 545.650                        | TBDR       |
| 151 | Nusa Tenggara Timur | Kab. Sumba Barat          | 371.890                        | TBDSR      |
| 152 | Irian Jaya Barat    | Kab. Fak-Fak              | 1.091.307                      | TBDST      |
| 153 | Irian Jaya Barat    | Kab. Manokwari            | 1.005.937                      | TBDST      |
| 154 | Irian Jaya Barat    | Kab. Sorong               | 953.478                        | TBDST      |
| 155 | Papua               | Kab. Jayawijaya           | 763.324                        | TBDSD      |
| 156 | Papua               | Kab. Mimika               | 1.164.121                      | TBDST      |

**Keterangan :**

**TBD** : Tenaga Kerja - Biaya Tenaga Kerja - Biaya Aktual

Dibelakang **TBD** - **ST** : Sangat Tinggi

**T** : Tinggi

**SD** : Sedang

**R** : Rendah

**SR** : Sangat Rendah

|            |         |         |
|------------|---------|---------|
| Rata-rata  | 664.456 |         |
| Stand. Dev | 221.777 |         |
|            |         |         |
| TBDST      | 886.233 |         |
| TBDT       | 775.345 | 886.233 |
| TBDSD      | 553.567 | 775.345 |
| TBDR       | 553.567 | 442.679 |
| TBDSR      | 442.679 |         |

Lampiran 4.3.3.2.2.B. Indikator Biaya Tenaga Kerja Aktual

| No. | Propinsi            | Kabupaten             | Rata-Rata Upah Tenaga Kerja | Intensitas |
|-----|---------------------|-----------------------|-----------------------------|------------|
| 1   | Sumatera Utara      | Kota Binjai           | 770.069                     | TBDSD      |
| 2   | Sumatera Utara      | Kota Medan            | 870.927                     | TBDT       |
| 3   | Sumatera Utara      | Kota Pematang Siantar | 654.326                     | TBDSD      |
| 4   | Sumatera Utara      | Kota Sibolga          | 1.260.000                   | TBDST      |
| 5   | Sumatera Utara      | Kota Tanjung Balai    | 621.175                     | TBDSD      |
| 6   | Sumatera Utara      | Kota Tebing Tinggi    | 552.393                     | TBDR       |
| 7   | Sumatera Barat      | Kota Padang           | 827.983                     | TBDT       |
| 8   | Sumatera Barat      | Kota Sawahlunto       | 504.775                     | TBDR       |
| 9   | Riau                | Kota Batam            | 756.678                     | TBTSD      |
| 10  | Riau                | Kota Pekanbaru        | 1.105.306                   | TBDST      |
| 11  | Riau                | Kota Dumai            |                             |            |
| 12  | Sumatera Selatan    | Kota Palembang        | 972.464                     | TBDST      |
| 13  | Bangka Belitung     | Kota Pangkal Pinang   | 900.207                     | TBDST      |
| 14  | Bengkulu            | Kota Bengkulu         | 703.469                     | TBDSD      |
| 15  | Lampung             | Kota Bandar Lampung   | 641.392                     | TBDSD      |
| 16  | Banten              | Kota Tangerang        | 1.249.789                   | TBDST      |
| 17  | Banten              | Kota Cilegon          | 842.021                     | TBDT       |
| 18  | DKI Jakarta         | Kota DKI Jakarta      | 936.428                     | TBDST      |
| 19  | Jawa Barat          | Kota Bandung          | 872.624                     | TBDT       |
| 20  | Jawa Barat          | Kota Bekasi           | 1.466.794                   | TBDST      |
| 21  | Jawa Barat          | Kota Bogor            | 883.189                     | TBDT       |
| 22  | Jawa Barat          | Kota Cirebon          | 580.562                     | TBDSD      |
| 23  | Jawa Barat          | Kota Sukabumi         | 542.214                     | TBDR       |
| 24  | Jawa Tengah         | Kota Pekalongan       | 598.643                     | TBDSD      |
| 25  | Jawa Tengah         | Kota Semarang         | 690.734                     | TBDSD      |
| 26  | Jawa Tengah         | Kota Tegal            | 462.464                     | TBDR       |
| 27  | Jawa Tengah         | Kota Surakarta        | 781.507                     | TBDT       |
| 28  | DI. Yogyakarta      | Kota Jogjakarta       | 670.654                     | TBDSD      |
| 29  | Jawa Timur          | Kota Kediri           | 602.615                     | TBDSD      |
| 30  | Jawa Timur          | Kota Malang           | 942.109                     | TBDST      |
| 31  | Jawa Timur          | Kota Mojokerto        | 499.346                     | TBDR       |
| 32  | Jawa Timur          | Kota Probolinggo      | 435.115                     | TBDSR      |
| 33  | Jawa Timur          | Kota Surabaya         | 651.222                     | TBDSD      |
| 34  | Jawa Timur          | Kota Madiun           | 1.069.119                   | TBDST      |
| 35  | Bali                | Kota Denpasar         | 1.164.585                   | TBDST      |
| 36  | Kalimantan Timur    | Kota Balikpapan       | 1.036.219                   | TBDST      |
| 37  | Kalimantan Timur    | Kota Samarinda        | 949.317                     | TBDST      |
| 38  | Sulawesi Utara      | Kota Bitung           | 979.378                     | TBDST      |
| 39  | Sulawesi Utara      | Kota Manado           | 1.161.455                   | TBDST      |
| 40  | Gorontalo           | Kota Gorontalo        | 625.518                     | TBDSD      |
| 41  | Sulawesi Tenggara   | Kota Kendari          | 590.913                     | TBDSD      |
| 42  | Sulawesi Selatan    | Kota Pare-Pare        | 1.100.146                   | TBDST      |
| 43  | Nusa Tenggara Barat | Kota Mataram          | 656.742                     | TBDSD      |
| 44  | Nusa Tenggara Timur | Kota Kupang           | 530.695                     | TBDR       |

**Keterangan :**

**TBD** : Tenaga Kerja - Biaya Tenaga Kerja - Biaya Aktual  
Dibelakang **TBD** - **ST** : Sangat Tinggi  
**T** : Tinggi  
**SD** : Sedang  
**R** : Rendah  
**SR** : Sangat Rendah

|            |         |         |
|------------|---------|---------|
| Rata-rata  | 664.456 |         |
| Stand. Dev | 221.777 |         |
|            |         |         |
| TBDST      | 886.233 |         |
| TBDT       | 775.345 | 886.233 |
| TBDSD      | 553.567 | 775.345 |
| TBDR       | 553.567 | 442.679 |
| TBDSR      | 442.679 |         |



Lampiran 4.3.3.3.A. Indikator Produktivitas Tenaga Kerja

| No. | Propinsi         | Kabupaten                  | Nilai Tambah Industri<br>(Juta Rp.) | Jumlah Tenaga Kerja Industri<br>(Orang) | Produktivitas | Intensitas |
|-----|------------------|----------------------------|-------------------------------------|-----------------------------------------|---------------|------------|
| 1   | Sumatera Utara   | Kab. Asahan                | 3.734.722,02                        | 35.209                                  | 106.072.936   | TPPST      |
| 2   | Sumatera Utara   | Kab. Dairi                 | 5.184,40                            | 3.484                                   | 1.488.060     | TPPSR      |
| 3   | Sumatera Utara   | Kab. Deli Serdang          | 2.780.396,33                        | 103.393                                 | 26.891.534    | TPPSD      |
| 4   | Sumatera Utara   | Kab. Langkat               | 585.010,87                          | 27.086                                  | 21.598.275    | TPPR       |
| 5   | Sumatera Utara   | Kab. Simalungun            | 721.599,60                          | 26.338                                  | 27.397.661    | TPPSD      |
| 6   | Sumatera Utara   | Kab. Tanah Karo            | 31.228,45                           | 2.613                                   | 11.951.186    | TPPR       |
| 7   | Sumatera Utara   | Kab. Labuhan Batu          | 3.320.326,64                        | 14.040                                  | 236.490.501   | TPPST      |
| 8   | Sumatera Utara   | Kab. Tapanuli Utara        | 13.690,27                           | 1.013                                   | 13.514.580    | TPPR       |
| 9   | Sumatera Barat   | Kab. Pesisir Selatan       | 173.853,55                          | 1.716                                   | 101.313.258   | TPPST      |
| 10  | Sumatera Barat   | Kab. Sawah Lunto Sijunjung | 96.732,61                           | 5.840                                   | 16.563.803    | TPPR       |
| 11  | Sumatera Barat   | Kab. Pasaman               | 120.325,36                          | 5.756                                   | 20.904.336    | TPPR       |
| 12  | Sumatera Barat   | Kab. Solok                 | 148.646,46                          | 1.752                                   | 84.843.870    | TPPST      |
| 13  | Riau             | Kab. Bengkalis             | 179.547,57                          | 17.591                                  | 10.206.786    | TPPR       |
| 14  | Riau             | Kab. Indragiri Hilir       | 259.648,48                          | 24.006                                  | 10.815.983    | TPPR       |
| 15  | Riau             | Kab. Kampar                | 87.663,36                           | 19.593                                  | 4.474.218     | TPPSR      |
| 16  | Riau             | Kab. Kuantan Singingi      | 59.329,78                           | 6.824                                   | 8.694.282     | TPPR       |
| 17  | Riau             | Kab. Pelalawan             | 157.600,08                          | 30.122                                  | 5.232.094     | TPPSR      |
| 18  | Riau             | Kab. Rokan Hulu            | 53.211,31                           | 7.355                                   | 7.234.712     | TPPR       |
| 19  | Jambi            | Kab. Batanghari            | 138.005,74                          | 2.091                                   | 65.999.876    | TPPT       |
| 20  | Jambi            | Kab. Bungo                 | 45.469,51                           | 5.061                                   | 8.984.294     | TPPR       |
| 21  | Jambi            | Kab. Kerinci               | 51.690,60                           | 4.836                                   | 10.688.710    | TPPR       |
| 22  | Jambi            | Kab. Tanjung Jabung Timur  | 137.813,49                          | 3.324                                   | 41.460.135    | TPPSD      |
| 23  | Jambi            | Kab. Tebo                  | 18.971,46                           | 10.422                                  | 1.820.328     | TPPSR      |
| 24  | Sumatera Selatan | Kab. Muara Enim            | 153.907,00                          | 10.540                                  | 14.602.182    | TPPR       |
| 25  | Sumatera Selatan | Kab. Musi Banyuasin        | 286.322,00                          | 42.112                                  | 6.799.060     | TPPR       |
| 26  | Sumatera Selatan | Kab. Musi Rawas            | 194.946,00                          | 14.382                                  | 13.554.860    | TPPR       |
| 27  | Sumatera Selatan | Kab. Ogan Kemiling Ilir    | 334.375,00                          | 43.122                                  | 7.754.163     | TPPR       |
| 28  | Sumatera Selatan | Kab. Lahat                 | 196.588,00                          | 956                                     | 205.635.983   | TPPST      |
| 29  | Bangka Belitung  | Kab. Bangka                | 1.408.048,00                        | 9.394                                   | 149.888.014   | TPPST      |
| 30  | Bangka Belitung  | Kab. Belitung              | 279.643,00                          | 5.120                                   | 54.617.773    | TPPT       |
| 31  | Bengkulu         | Kab. Bengkulu Selatan      | 11.252,00                           | 3.609                                   | 3.117.761     | TPPSR      |
| 32  | Lampung          | Kab. Lampung Barat         | 28.616,00                           | 1.310                                   | 21.844.275    | TPPR       |
| 33  | Lampung          | Kab. Lampung Selatan       | 438.812,00                          | 44.561                                  | 9.847.445     | TPPR       |
| 34  | Lampung          | Kab. Lampung Timur         | 192.548,00                          | 51.480                                  | 3.740.249     | TPPSR      |
| 35  | Lampung          | Kab. Lampung Utara         | 73.920,00                           | 7.062                                   | 10.467.290    | TPPR       |
| 36  | Jawa Barat       | Kab. Bandung               | 12.972.430,22                       | 487.823                                 | 26.592.494    | TPPSD      |
| 37  | Lampung          | Kab. Way Kanan             | 39.320,00                           |                                         |               |            |
| 38  | Banten           | Kab. Lebak                 | 280.922,62                          | 5.088                                   | 55.212.779    | TPPT       |
| 39  | Banten           | Kab. Serang                | 3.645.759,00                        | 120.072                                 | 30.363.107    | TPPSD      |
| 40  | Banten           | Kab. Tangerang             | 8.678.171,00                        | 289.300                                 | 29.997.134    | TPPSD      |
| 41  | Jawa Barat       | Kab. Bekasi                | 27.034.051,42                       | 213.764                                 | 126.466.811   | TPPST      |
| 42  | Jawa Barat       | Kab. Bogor                 | 5.601.552,92                        | 256.881                                 | 21.806.023    | TPPR       |
| 43  | Jawa Barat       | Kab. Ciamis                | 461.068,61                          | 93.895                                  | 4.910.470     | TPPSR      |
| 44  | Jawa Barat       | Kab. Cianjur               | 169.966,69                          | 57.716                                  | 2.944.880     | TPPSR      |
| 45  | Jawa Barat       | Kab. Cirebon               | 543.861,67                          | 85.853                                  | 6.334.801     | TPPR       |
| 46  | Jawa Barat       | Kab. Garut                 | 579.982,64                          | 72.864                                  | 7.959.797     | TPPR       |
| 47  | Jawa Barat       | Kab. Indramayu             | 2.859.819,69                        | 68.802                                  | 41.565.938    | TPPSD      |
| 48  | Jawa Barat       | Kab. Karawang              | 3.060.027,00                        | 115.557                                 | 26.480.672    | TPPSD      |
| 49  | Jawa Barat       | Kab. Kuningan              | 67.477,77                           | 21.326                                  | 3.164.108     | TPPSR      |
| 50  | Jawa Barat       | Kab. Purwakarta            | 2.396.990,22                        | 57.800                                  | 41.470.419    | TPPSD      |
| 51  | Jawa Barat       | Kab. Sukabumi              | 1.093.753,10                        | 144.417                                 | 7.573.576     | TPPR       |
| 52  | Jawa Barat       | Kab. Sumedang              | 496.485,16                          | 95.417                                  | 5.203.320     | TPPSR      |
| 53  | Jawa Barat       | Kab. Tasikmalaya           | 530.720,21                          | 149.155                                 | 3.558.179     | TPPSR      |
| 54  | Jawa Barat       | Kab. Subang                | 248.595,00                          | 33.174                                  | 7.493.670     | TPPR       |
| 55  | Jawa Tengah      | Kab. Kendal                | 1.672.519,77                        | 63.498                                  | 26.339.724    | TPPSD      |
| 56  | Jawa Tengah      | Kab. Magelang              | 580.495,90                          | 108.058                                 | 5.372.077     | TPPSR      |

| No. | Propinsi           | Kabupaten                | Nilai Tambah Industri<br>(Juta Rp.) | Jumlah Tenaga Kerja Industri<br>(Orang) | Produktivitas | Intensitas |
|-----|--------------------|--------------------------|-------------------------------------|-----------------------------------------|---------------|------------|
| 57  | Jawa Tengah        | Kab. Pekalongan          | 901.850,22                          | 106.944                                 | 8.432.920     | TPPR       |
| 58  | Jawa Tengah        | Kab. Pemalang            | 541.677,93                          | 40.104                                  | 13.506.830    | TPPR       |
| 59  | Jawa Tengah        | Kab. Sukoharjo           | 758.624,97                          | 86.892                                  | 8.730.665     | TPPR       |
| 60  | Jawa Tengah        | Kab. Tegal               | 588.900,50                          | 84.664                                  | 6.955.737     | TPPR       |
| 61  | Jawa Tengah        | Kab. Banyumas            | 618.744,42                          | 109.172                                 | 5.667.611     | TPPSR      |
| 62  | Jawa Tengah        | Kab. Boyolali            | 364.563,89                          | 90.234                                  | 4.040.205     | TPPSR      |
| 63  | Jawa Tengah        | Kab. Cilacap             | 9.362.072,33                        | 99.146                                  | 94.427.131    | TPPST      |
| 64  | Jawa Tengah        | Kab. Jepara              | 897.941,86                          | 213.888                                 | 4.198.187     | TPPSR      |
| 65  | Jawa Tengah        | Kab. Karanganyar         | 1.172.755,49                        | 84.664                                  | 13.851.879    | TPPR       |
| 66  | Jawa Tengah        | Kab. Klaten              | 774.790,56                          | 151.504                                 | 5.113.994     | TPPSR      |
| 67  | Jawa Tengah        | Kab. Kudus               | 5.832.745,65                        | 176.012                                 | 33.138.341    | TPPSD      |
| 68  | Jawa Tengah        | Kab. Kebumen             | 214.738,35                          | 150.390                                 | 1.427.877     | TPPSR      |
| 69  | DI. Yogyakarta     | Kab. Bantul              | 462.233,00                          | 90.536                                  | 5.105.516     | TPPSR      |
| 70  | DI. Yogyakarta     | Kab. Gunung Kidul        | 297.944,00                          | 22.965                                  | 12.973.830    | TPPR       |
| 71  | Jawa Timur         | Kab. Bangkalan           | 77.156,92                           | 18.921                                  | 4.077.846     | TPPSR      |
| 72  | Jawa Timur         | Kab. Banyuwangi          | 265.574,90                          | 57.393                                  | 4.627.305     | TPPSR      |
| 73  | Jawa Timur         | Kab. Blitar              | 90.843,38                           | 37.674                                  | 2.411.302     | TPPSR      |
| 74  | Jawa Timur         | Kab. Kediri              | 406.287,36                          | 80.472                                  | 5.048.804     | TPPSR      |
| 75  | Jawa Timur         | Kab. Magetan             | 143.251,21                          | 15.456                                  | 9.268.324     | TPPR       |
| 76  | Jawa Timur         | Kab. Mojokerto           | 1.003.382,55                        | 105.546                                 | 9.506.590     | TPPR       |
| 77  | Jawa Timur         | Kab. Pamekasan           | 13.147,21                           | 19.908                                  | 660.398       | TPPSR      |
| 78  | Jawa Timur         | Kab. Pasuruan            | 1.351.165,84                        | 215.082                                 | 6.282.096     | TPPSR      |
| 79  | Jawa Timur         | Kab. Sidoarjo            | 6.525.148,33                        | 286.860                                 | 22.746.804    | TPPSD      |
| 80  | Jawa Timur         | Kab. Bondowoso           | 91.262,45                           | 29.925                                  | 3.049.706     | TPPSR      |
| 81  | Jawa Timur         | Kab. Gresik              | 5.166.875,09                        | 129.507                                 | 39.896.493    | TPPSD      |
| 82  | Jawa Timur         | Kab. Jember              | 450.897,90                          | 121.359                                 | 3.715.406     | TPPSR      |
| 83  | Jawa Timur         | Kab. Jombang             | 365.738,50                          | 60.480                                  | 6.047.264     | TPPSR      |
| 84  | Jawa Timur         | Kab. Lamongan            | 183.099,69                          | 37.737                                  | 4.851.994     | TPPSR      |
| 85  | Jawa Timur         | Kab. Ponorogo            | 162.011,56                          | 78.414                                  | 2.066.105     | TPPSR      |
| 86  | Jawa Timur         | Kab. Tulungagung         | 708.711,72                          | 91.539                                  | 7.742.183     | TPPR       |
| 87  | Bali               | Kab. Badung              | 115.399,13                          | 18.277                                  | 6.313.899     | TPPR       |
| 88  | Bali               | Kab. Bangli              | 64.492,91                           | 26.956                                  | 2.392.525     | TPPSR      |
| 89  | Bali               | Kab. Buleleng            | 230.017,86                          | 26.301                                  | 8.745.594     | TPPR       |
| 90  | Bali               | Kab. Gianyar             | 443.901,91                          | 78.678                                  | 5.642.008     | TPPSR      |
| 91  | Bali               | Kab. Jembrana            | 92.945,66                           | 26.592                                  | 3.495.249     | TPPSR      |
| 92  | Bali               | Kab. Tabanan             | 128.403,68                          | 24.204                                  | 5.305.060     | TPPSR      |
| 93  | Bali               | Kab. Karangasem          | 101.192,83                          | 38.713                                  | 2.613.924     | TPPSR      |
| 94  | Kalimantan Barat   | Kab. Kapuas Hulu         | 15.499,62                           | 584                                     | 26.540.449    | TPPSD      |
| 95  | Kalimantan Barat   | Kab. Ketapang            | 301.004,02                          | 37.463                                  | 8.034.701     | TPPR       |
| 96  | Kalimantan Barat   | Kab. Pontianak           | 1.975.140,94                        | 39.133                                  | 50.472.515    | TPPSD      |
| 97  | Kalimantan Barat   | Kab. Sambas              | 212.173,32                          | 22.110                                  | 9.596.261     | TPPR       |
| 98  | Kalimantan Barat   | Kab. Sanggau             | 621.939,43                          | 3.504                                   | 177.494.130   | TPPST      |
| 99  | Kalimantan Tengah  | Kab. Barito Selatan      | 59.682,57                           | 1.659                                   | 35.975.027    | TPPSD      |
| 100 | Kalimantan Tengah  | Kab. Barito Utara        | 59.839,23                           | 1.864                                   | 32.102.591    | TPPSD      |
| 101 | Kalimantan Tengah  | Kab. Kapuas              | 148.993,33                          | 5.967                                   | 24.969.554    | TPPSD      |
| 102 | Kalimantan Selatan | Kab. Hulu Sungai Selatan | 53.809,16                           | 26.744                                  | 2.012.009     | TPPSR      |
| 103 | Kalimantan Selatan | Kab. Hulu Sungai Tengah  | 60.398,33                           | 11.998                                  | 5.034.034     | TPPSR      |
| 104 | Kalimantan Selatan | Kab. Hulu Sungai Utara   | 72.487,80                           | 31.234                                  | 2.320.798     | TPPSR      |
| 105 | Kalimantan Selatan | Kab. Tabalong            | 20.593,63                           | 2.738                                   | 7.521.415     | TPPR       |
| 106 | Kalimantan Selatan | Kab. Tanah Laut          | 281.609,59                          | 14.786                                  | 19.045.691    | TPPR       |
| 107 | Kalimantan Selatan | Kab. Tapin               | 19.823,93                           | 5.556                                   | 3.568.021     | TPPSR      |
| 108 | Kalimantan Timur   | Kab. Berau               | 365.463,50                          | 8.619                                   | 42.402.077    | TPPSD      |
| 109 | Kalimantan Timur   | Kab. Kutai               | 506.180,00                          | 18.265                                  | 27.713.113    | TPPSD      |
| 110 | Kalimantan Timur   | Kab. Pasir               | 216.818,76                          | 12.348                                  | 17.559.019    | TPPR       |
| 111 | Kalimantan Timur   | Kab. Bulungan            | 87.263,00                           | 1.042                                   | 83.745.681    | TPPST      |
| 112 | Kalimantan Timur   | Kab. Kutai Timur         | 34.467,06                           | 9.378                                   | 3.675.310     | TPPSR      |

| No. | Propinsi            | Kabupaten                 | Nilai Tambah Industri<br>(Juta Rp.) | Jumlah Tenaga Kerja Industri<br>(Orang) | Produktivitas | Intensitas |
|-----|---------------------|---------------------------|-------------------------------------|-----------------------------------------|---------------|------------|
| 113 | Kalimantan Timur    | Kab. Nunukan              | 256,00                              | 588                                     | 435.374       | TPPSR      |
| 114 | Sulawesi Utara      | Kab. Minahasa             | 269.863,00                          | 26.210                                  | 10.296.185    | TPPR       |
| 115 | Sulawesi Utara      | Kab. Sangihe              | 32.658,00                           | 4.743                                   | 6.885.515     | TPPR       |
| 116 | Gorontalo           | Kab. Gorontalo            | 116.818,00                          | 13.254                                  | 8.813.792     | TPPR       |
| 117 | Sulawesi Tengah     | Kab. Banggai              | 83.374,35                           | 6.357                                   | 13.115.361    | TPPR       |
| 118 | Sulawesi Tengah     | Kab. Toli-Toli            | 59.160,30                           | 7.730                                   | 7.653.337     | TPPR       |
| 119 | Sulawesi Tengah     | Kab. Donggala             | 247.035,00                          | 17.208                                  | 14.355.823    | TPPR       |
| 120 | Sulawesi Tengah     | Kab. Morowali             | 27.783,44                           | 1.467                                   | 18.938.951    | TPPR       |
| 121 | Sulawesi Tengah     | Kab. Poso                 | 81.693,70                           | 1.956                                   | 41.765.695    | TPPSD      |
| 122 | Sulawesi Tenggara   | Kab. Buton                | 59.894,87                           | 12.382                                  | 4.837.253     | TPPSR      |
| 123 | Sulawesi Tenggara   | Kab. Kolaka               | 318.115,35                          | 2.306                                   | 137.951.149   | TPPST      |
| 124 | Sulawesi Selatan    | Kab. Luwu                 | 122.306,91                          | 10.937                                  | 11.182.857    | TPPR       |
| 125 | Sulawesi Selatan    | Kab. Majene               | 17.998,96                           | 854                                     | 21.076.066    | TPPR       |
| 126 | Sulawesi Selatan    | Kab. Pangkep              | 665.945,92                          | 4.270                                   | 155.959.232   | TPPST      |
| 127 | Sulawesi Selatan    | Kab. Pinrang              | 67.266,44                           | 1.653                                   | 40.693.551    | TPPSD      |
| 128 | Sulawesi Selatan    | Kab. Tana Toraja          | 36.374,37                           | 3.416                                   | 10.648.235    | TPPR       |
| 129 | Sulawesi Selatan    | Kab. Bantaeng             | 17.253,31                           | 1.653                                   | 10.437.574    | TPPR       |
| 130 | Sulawesi Selatan    | Kab. Barru                | 22.534,86                           | 2.562                                   | 8.795.808     | TPPR       |
| 131 | Sulawesi Selatan    | Kab. Bone                 | 157.211,63                          | 5.978                                   | 26.298.366    | TPPSD      |
| 132 | Sulawesi Selatan    | Kab. Enrekang             | 24.617,59                           | 1.618                                   | 15.214.827    | TPPR       |
| 133 | Sulawesi Selatan    | Kab. Gowa                 | 77.081,48                           | 5.978                                   | 12.894.192    | TPPR       |
| 134 | Sulawesi Selatan    | Kab. Jeneponto            | 14.764,28                           | 4.270                                   | 3.457.677     | TPPSR      |
| 135 | Sulawesi Selatan    | Kab. Luwu Utara           | 34.006,19                           | 854                                     | 39.819.895    | TPPSD      |
| 136 | Sulawesi Selatan    | Kab. Maros                | 671.623,45                          | 854                                     | 786.444.321   | TPPST      |
| 137 | Sulawesi Selatan    | Kab. Selayar              | 18.281,71                           | 2.764                                   | 6.614.222     | TPPR       |
| 138 | Sulawesi Selatan    | Kab. Sinjai               | 10.936,20                           | 2.127                                   | 5.141.608     | TPPSR      |
| 139 | Sulawesi Selatan    | Kab. Takalar              | 58.294,47                           | 854                                     | 68.260.504    | TPPT       |
| 140 | Nusa Tenggara Barat | Kab. Bima                 | 37.972,42                           | 16.809                                  | 2.259.053     | TPPSR      |
| 141 | Nusa Tenggara Barat | Kab. Lombok Barat         | 49.973,21                           | 27.569                                  | 1.812.660     | TPPSR      |
| 142 | Nusa Tenggara Barat | Kab. Dompu                | 20.772,50                           | 9.109                                   | 2.280.437     | TPPSR      |
| 143 | Nusa Tenggara Barat | Kab. Lombok Timur         | 125.737,02                          | 55.531                                  | 2.264.267     | TPPSR      |
| 144 | Nusa Tenggara Timur | Kab. Ende                 | 9.483,83                            | 31.595                                  | 300.169       | TPPSR      |
| 145 | Nusa Tenggara Timur | Kab. Flores Timur         | 4.937,81                            | 17.712                                  | 278.783       | TPPSR      |
| 146 | Nusa Tenggara Timur | Kab. Timur Tengah Selatan | 5.375,64                            | 836                                     | 6.430.190     | TPPR       |
| 147 | Nusa Tenggara Timur | Kab. Timur Tengah Utara   | 5.714,67                            | 3.936                                   | 1.451.898     | TPPSR      |
| 148 | Nusa Tenggara Timur | Kab. Belu                 | 7.744,76                            | 15.744                                  | 491.918       | TPPSR      |
| 149 | Nusa Tenggara Timur | Kab. Manggarai            | 7.670,53                            | 10.052                                  | 763.085       | TPPSR      |
| 150 | Nusa Tenggara Timur | Kab. Ngada                | 8.011,81                            | 3.444                                   | 2.326.309     | TPPSR      |
| 151 | Nusa Tenggara Timur | Kab. Sumba Barat          | 7.096,45                            | 2.460                                   | 2.884.737     | TPPSR      |
| 152 | Irian Jaya Barat    | Kab. Fak-Fak              | 67.483,95                           | 5.960                                   | 11.322.810    | TPPR       |
| 153 | Irian Jaya Barat    | Kab. Manokwari            | 59.061,09                           | 3.552                                   | 16.627.559    | TPPR       |
| 154 | Irian Jaya Barat    | Kab. Sorong               | 120.091,89                          | 596                                     | 201.496.460   | TPPST      |
| 155 | Papua               | Kab. Jayawijaya           | 2.537,01                            | 540                                     | 4.698.167     | TPPSR      |
| 156 | Papua               | Kab. Mimika               | 3.330,10                            | 675                                     | 4.933.485     | TPPSR      |

**Keterangan :**

**TPP** : Tenaga Kerja - Produktivitas - Tenaga Kerja

Dibelakang **TPP** - **ST** : Sangat Tinggi

**T** : Tinggi

**SD** : Sedang

**R** : Rendah

**SR** : Sangat Rendah

|            |            |             |
|------------|------------|-------------|
| Rata-rata  | 37.700.454 | (150-9,8Jt) |
| Stand. Dev | 31.386.959 | (150-9,8Jt) |
| TPPST      | 69.087.413 |             |
| TPPT       | 53.393.933 | 69.087.413  |
| TPPSD      | 22.006.975 | 53.393.933  |
| TPPR       | 22.006.975 | 6.313.495   |
| TPPSR      | 6.313.495  |             |

Lampiran 4.3.3.3.B. Indikator Produktivitas Tenaga Kerja

| No. | Propinsi            | Kota                  | Nilai Tambah Industri<br>(Juta Rp.) | Jumlah Tenaga Kerja Industri<br>(Orang) | Produktivitas | Intensitas |
|-----|---------------------|-----------------------|-------------------------------------|-----------------------------------------|---------------|------------|
| 1   | Sumatera Utara      | Kota Binjai           | 299.308,46                          | 5.226                                   | 57.272.954    | TPPT       |
| 2   | Sumatera Utara      | Kota Medan            | 3.498.314,61                        | 77.519                                  | 45.128.480    | TPPSD      |
| 3   | Sumatera Utara      | Kota Pematang Siantar | 708.617,94                          | 19.162                                  | 36.980.375    | TPPSD      |
| 4   | Sumatera Utara      | Kota Sibolga          | 60.932,33                           | 1.599                                   | 38.106.523    | TPPSD      |
| 5   | Sumatera Utara      | Kota Tanjung Balai    | 227.796,24                          | 3.484                                   | 65.383.536    | TPPT       |
| 6   | Sumatera Utara      | Kota Tebing Tinggi    | 193.086,14                          | 5.226                                   | 36.947.214    | TPPSD      |
| 7   | Sumatera Barat      | Kota Padang           | 1.276.393,30                        | 24.048                                  | 53.076.900    | TPPSD      |
| 8   | Sumatera Barat      | Kota Sawahlunto       | 50.678,94                           | 6.424                                   | 7.889.001     | TPPR       |
| 9   | Riau                | Kota Batam            | 5.121.683,48                        | 47.626                                  | 107.539.652   | TPPST      |
| 10  | Riau                | Kota Pekanbaru        | 228.311,23                          | 32.362                                  | 7.054.917     | TPPR       |
| 11  | Riau                | Kota Dumai            | 23.557,69                           | 13.015,09                               | 1.810.029     | TPPSR      |
| 12  | Sumatera Selatan    | Kota Palembang        | 4.495.955,00                        | 43.976                                  | 102.236.561   | TPPST      |
| 13  | Bangka Belitung     | Kota Pangkal Pinang   | 83.447,00                           | 7.182                                   | 11.618.908    | TPPR       |
| 14  | Bengkulu            | Kota Bengkulu         | 29.886,00                           | 1.845                                   | 16.198.374    | TPPR       |
| 15  | Lampung             | Kota Bandar Lampung   | 1.511.533,00                        | 21.692                                  | 69.681.588    | TPPT       |
| 16  | Banten              | Kota Tangerang        | 10.712.522,00                       | 267.152                                 | 40.098.977    | TPPSD      |
| 17  | Banten              | Kota Cilegon          | 4.925.693,82                        | 44.848                                  | 109.830.847   | TPPST      |
| 18  | DKI Jakarta         | Kota DKI Jakarta      | 41.276.000,00                       | 420.156,00                              | 98.239.701    | TPPST      |
| 19  | Jawa Barat          | Kota Bandung          | 5.429.132,32                        | 223.410                                 | 24.301.205    | TPPSD      |
| 20  | Jawa Barat          | Kota Bekasi           | 4.693.941,00                        | 150.294                                 | 31.231.726    | TPPSD      |
| 21  | Jawa Barat          | Kota Bogor            | 803.241,57                          | 63.638                                  | 12.622.043    | TPPR       |
| 22  | Jawa Barat          | Kota Cirebon          | 1.711.580,71                        | 14.894                                  | 114.917.464   | TPPST      |
| 23  | Jawa Barat          | Kota Sukabumi         | 47.994,63                           | 16.248                                  | 2.953.879     | TPPSR      |
| 24  | Jawa Tengah         | Kota Pekalongan       | 395.961,84                          | 21.166                                  | 18.707.448    | TPPR       |
| 25  | Jawa Tengah         | Kota Semarang         | 4.265.998,26                        | 207.204                                 | 20.588.397    | TPPR       |
| 26  | Jawa Tengah         | Kota Tegal            | 198.763,93                          | 8.912                                   | 22.302.954    | TPPSD      |
| 27  | Jawa Tengah         | Kota Surakarta        | 985.606,12                          | 54.586                                  | 18.056.024    | TPPR       |
| 28  | DI. Yogyakarta      | Kota Yogyakarta       | 451.711,00                          | 18.354                                  | 24.611.038    | TPPSD      |
| 29  | Jawa Timur          | Kota Kediri           | 12.834.822,64                       | 28.392                                  | 452.057.715   | TPPST      |
| 30  | Jawa Timur          | Kota Malang           | 2.961.459,61                        | 85.176                                  | 34.768.710    | TPPSD      |
| 31  | Jawa Timur          | Kota Mojokerto        | 97.661,38                           | 16.380                                  | 5.962.233     | TPPSR      |
| 32  | Jawa Timur          | Kota Probolinggo      | 296.738,30                          | 5.460                                   | 54.347.674    | TPPT       |
| 33  | Jawa Timur          | Kota Surabaya         | 16.229.452,84                       | 248.976                                 | 65.184.808    | TPPT       |
| 34  | Jawa Timur          | Kota Madiun           | 219.124,03                          | 6.552                                   | 33.443.839    | TPPSD      |
| 35  | Bali                | Kota Denpasar         | 445.701,60                          | 35.497                                  | 12.556.036    | TPPR       |
| 36  | Kalimantan Timur    | Kota Balikpapan       | 4.137.292,67                        | 13.025                                  | 317.642.431   | TPPST      |
| 37  | Kalimantan Timur    | Kota Samarinda        | 2.107.931,12                        | 56.365                                  | 37.397.873    | TPPSD      |
| 38  | Sulawesi Utara      | Kota Bitung           | 234.019,00                          | 8.364                                   | 27.979.316    | TPPSD      |
| 39  | Sulawesi Utara      | Kota Manado           | 167.364,00                          | 12.792                                  | 13.083.490    | TPPR       |
| 40  | Gorontalo           | Kota Gorontalo        | 26.420,63                           | 2.904                                   | 9.098.014     | TPPR       |
| 41  | Sulawesi Tenggara   | Kota Kendari          | 95.631,28                           | 9.946                                   | 9.615.049     | TPPR       |
| 42  | Sulawesi Selatan    | Kota Pare-Pare        | 15.928,20                           | 799                                     | 19.935.169    | TPPR       |
| 43  | Nusa Tenggara Barat | Kota Mataram          | 122.176,04                          | 11.523                                  | 10.602.798    | TPPR       |
| 44  | Nusa Tenggara Timur | Kota Kupang           | 44.611,72                           | 7.557                                   | 5.903.364     | TPPSR      |

**Keterangan :**

**TPP** : Tenaga Kerja - Produktivitas - Tenaga Kerja

Dibelakang **TPP** - **ST** : Sangat Tinggi

**T** : Tinggi

**SD** : Sedang

**R** : Rendah

**SR** : Sangat Rendah

|            |            |             |
|------------|------------|-------------|
| Rata-rata  | 37.700.454 | (150-9,8Jt) |
| Stand. Dev | 31.386.959 | (150-9,8Jt) |
|            |            |             |
| TPPST      | 69.087.413 |             |
| TPPT       | 53.393.933 | 69.087.413  |
| TPPSD      | 22.006.975 | 53.393.933  |
| TPPR       | 22.006.975 | 6.313.495   |
| TPPSR      | 6.313.495  |             |

Lampiran 4.4. Hirarki dan Bobot Faktor, Variabel, Indikator, Intensitas Pemeringkatan

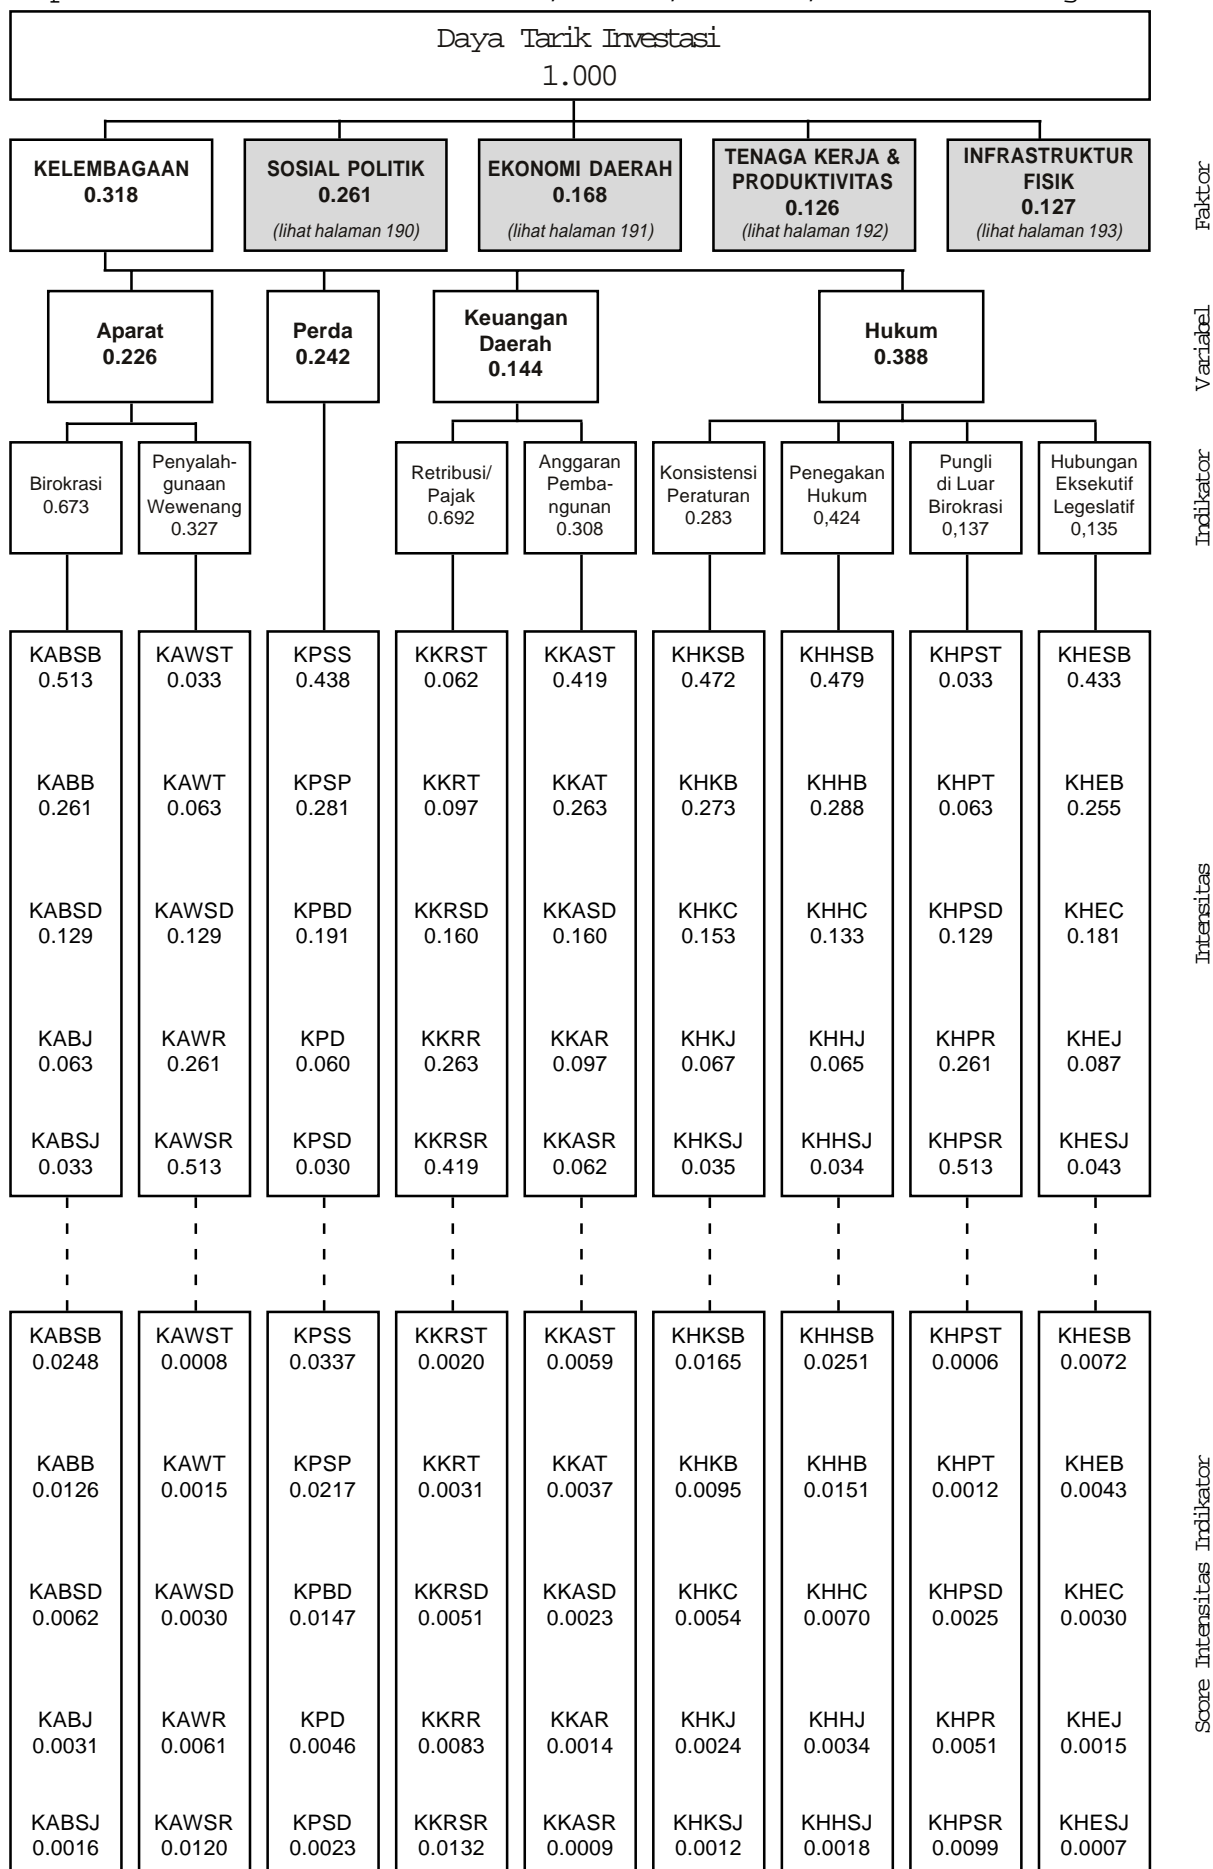

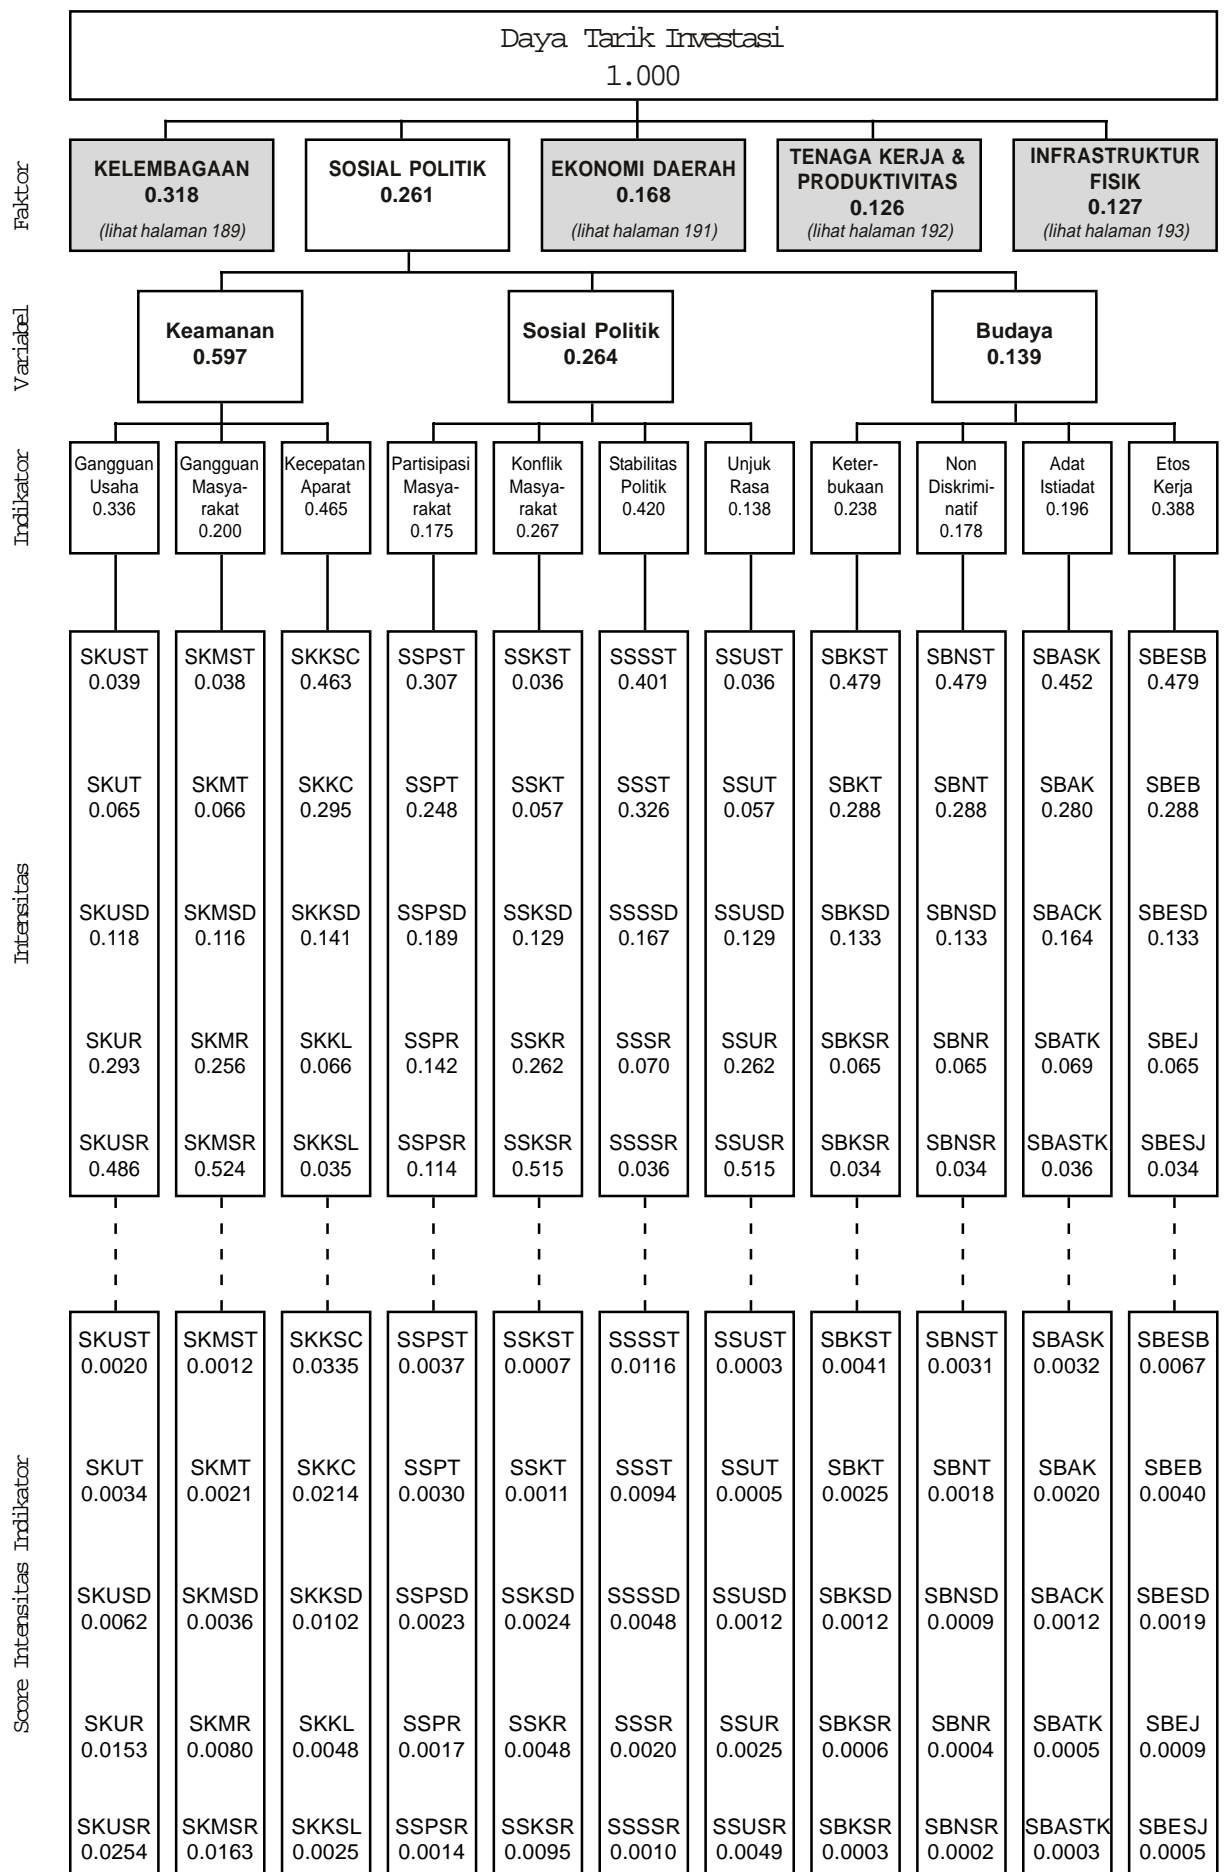

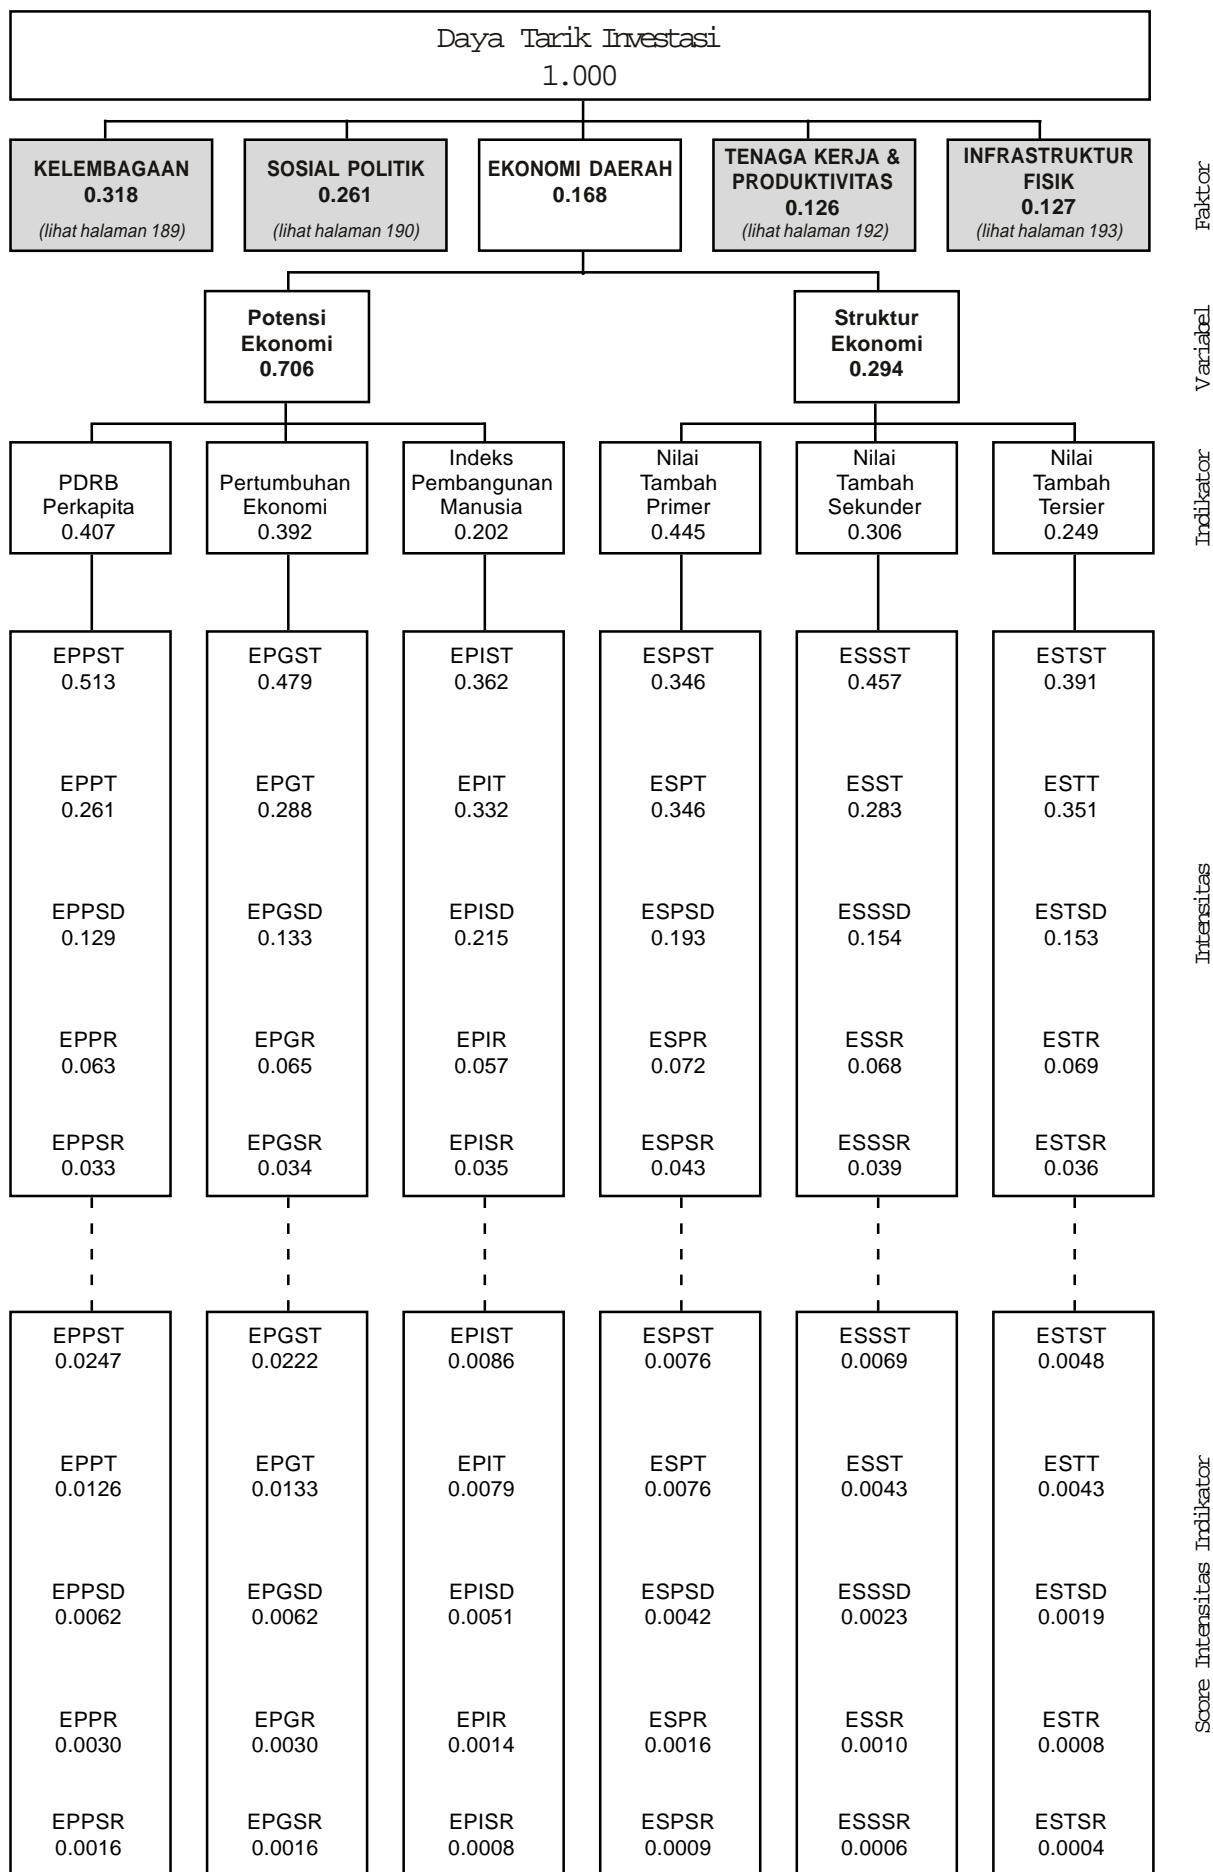

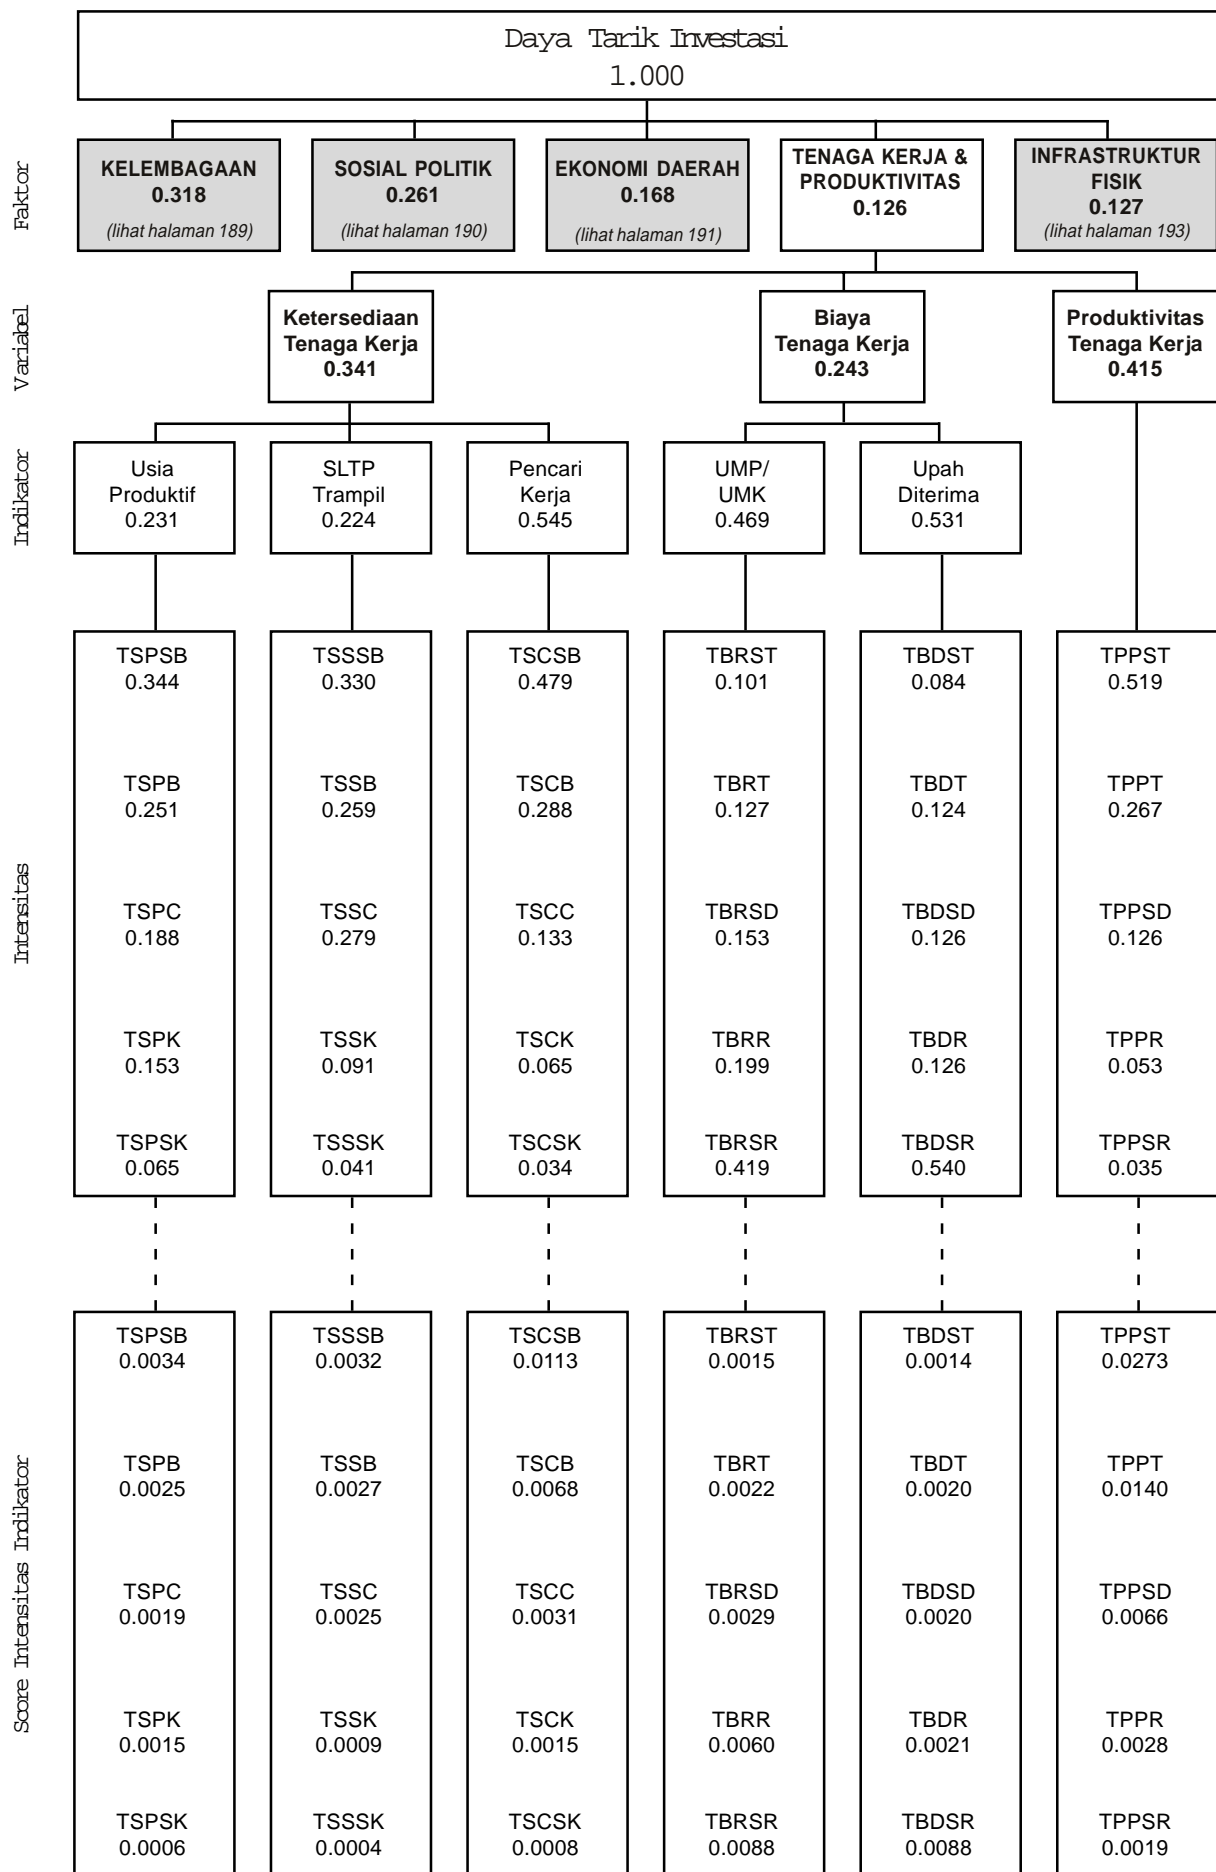



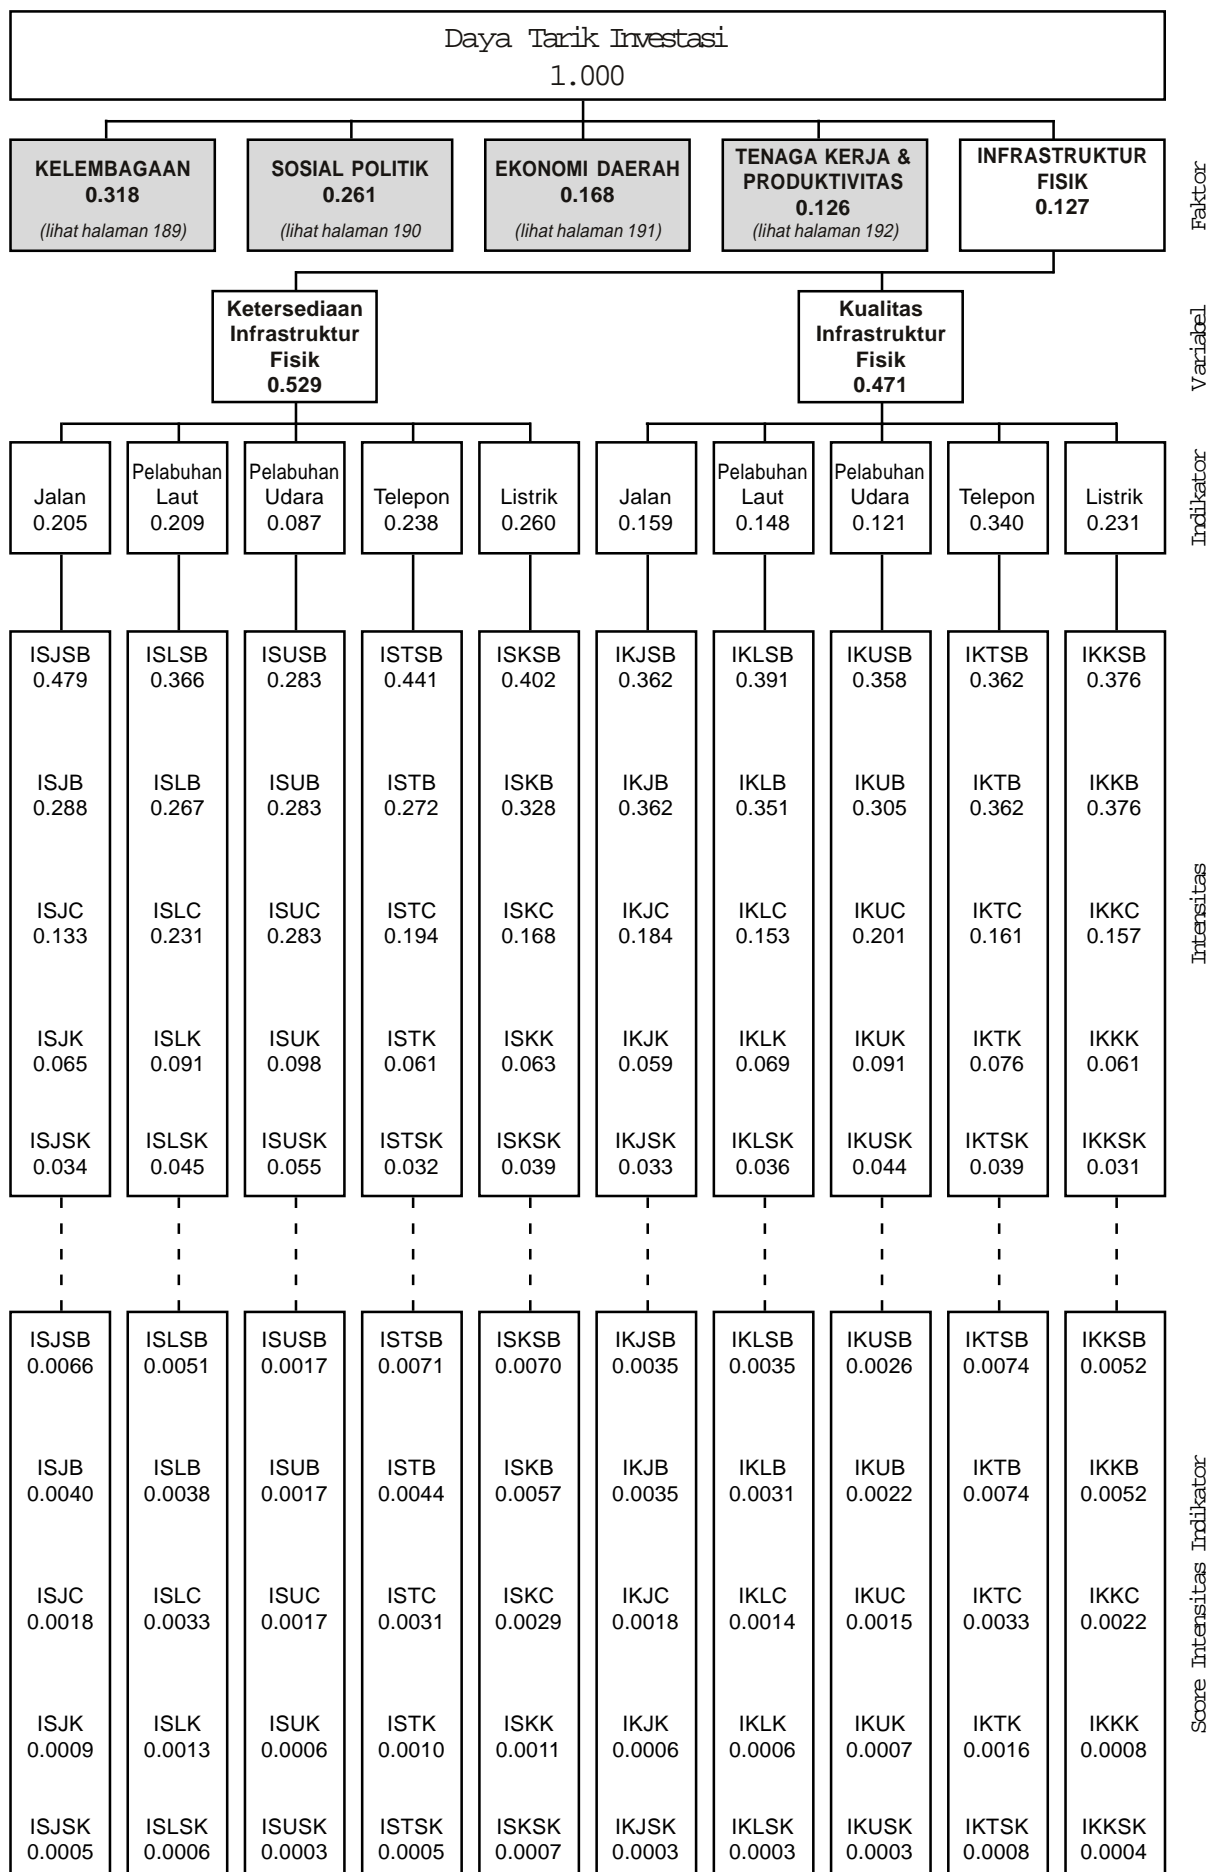

Sebagaimana disampaikan dalam laporan penelitian pada bagian III.B.3.1.; indikator pemeringkatan ditentukan melalui studi literatur, lokakarya terbatas para ahli, dan hasil pemeringkatan KPPOD tahun 2001. Hasil tersebut diolah lagi oleh sejumlah ahli terbatas dalam suatu *panel judgment* yang menghasilkan hasil akhir indikator dan hirarki pemeringkatan.

Selanjutnya dengan pengolahan hasil pembobotan indikator dari *judgement* para ahli sebagaimana dijelaskan pada bagian III.3.1.1. ditentukan bobot indikator (skala penting tidaknya tiap indikator) terhadap daya tarik investasi suatu daerah, sebagaimana ditampilkan hasilnya dalam bagan lampiran 4.1.

Dalam bagan hirarki pemeringkatan pada lampiran 4.1 kita bisa lihat 5 faktor penentu daya tarik investasi suatu daerah, dilengkapi dengan bobotnya masing masing. Apabila kita jumlahkan keseluruhan bobot masing masing faktor (level pertama dari hirarki pemeringkatan) maka jumlah yang dihasilkan harus 1 (satu).

Demikian juga dengan jumlah bobot seluruh variabel yang tercakup dalam faktor yang sama (level kedua hirarki pemeringkatan) harus berjumlah 1 (satu).

Hal yang sama juga berlaku untuk bobot indikator indikator dalam satu variabel yang sama (level ketiga hirarki pemeringkatan) juga harus berjumlah 1 (satu).

Terakhir, bobot intensitas intensitas dalam tiap indikator yang sama (level keempat hirarki pemeringkatan) juga berjumlah 1 (satu).

Bila kita melihat pada turunan selanjutnya dibawah level intensitas (untuk memudahkan, sebut saja level kelima); maka kita akan melihat bahwa **nilai intensitas (bukan bobot intensitas)** yang terlihat pada level kelima, contoh untuk **indikator birokrasi** dengan intensitas **KABSB** (singkatan dari Kelembagaan - Aparat - Birokrasi

- Sangat Baik) adalah **0.0248**. Jumlah keseluruhan nilai intensitas tertinggi untuk setiap indikator dari 42 (empat puluh dua) indikator pemeringkatan adalah 1 (satu).

Dengan mengambil contoh **indikator birokrasi** di atas, nilai intensitas tersebut dapat dijelaskan sebagai berikut:

1. Nilai **0.0248** adalah nilai intensitas KABSB dimana untuk indikator **'Birokrasi'** yang dinilai **'sangat baik'** akan menghasilkan nilai 0.0248. Sedangkan bila untuk indikator yang sama dinilai **'sangat jelek'** KABSIJ (singkatan dari Kelembagaan - Aparat - Birokrasi - Sangat Jelek) maka menghasilkan nilai **0.0016**.

2. Nilai **0.0248** tersebut didapat dari perkalian antar bobot:

$$\text{intensitas} \times \text{indikator} \times \text{variabel} \times \text{faktor} \\ 0.513 \times 0.673 \times 0.226 \times 0.318 = 0.0248$$

3. Pada lampiran 5.11. nilai **0.0062** pada indikator **'Birokrasi'** dari Kota Sawahlunto yang dinilai **'baik'** dengan notasi KABB (singkatan dari Kelembagaan - Aparat - Birokrasi - Baik), didapat dari perkalian antar bobot:

$$\text{intensitas} \times \text{indikator} \times \text{variabel} \times \text{faktor} \\ 0.126 \times 0.673 \times 0.226 \times 0.318 = 0.0062$$

(Catatan: perbedaan digit hanya karena faktor pembulatan)

Penghitungan dengan cara yang sama juga dilakukan pada intensitas dari indikator indikator lainnya untuk menghasilkan nilai intensitas tiap indikator pemeringkatan.

Jumlah kumulatif nilai intensitas dari ke 42 (empat puluh dua) indikator pemeringkatan menghasilkan nilai total, yang kemudian dibandingkan antar daerah untuk mendapatkan hasil urutan peringkat total. Bila suatu daerah mendapatkan nilai intensitas tertinggi untuk tiap indikator dari semua 42 (empat puluh dua) indikator pemeringkatan, maka nilai totalnya harus 1 (satu).

Untuk peringkat per kategori maka nilai intensitas yang dijumlahkan berdasarkan intensitas intensitas dari kategori spesifik yang dimaksud. Misalnya peringkat nilai Kelembagaan merupakan perbandingan nilai kumulatif dari indikator indikator yang masuk pada faktor Kelembagaan saja.

Lampiran 4.6. Hasil Pembobotan (Score) Intensitas Indikator dengan Metode AHP  
 Lampiran 4.6.1 Hasil Pembobotan (Score) Intensitas Indikator dengan Metode AHP 156 Kabupaten di Indonesia  
 Lampiran 4.6.1.1 Hasil Pembobotan (Score) Indikator, Variabel, Faktor Kelembagaan 156 Kabupaten di Indonesia

| NO. | PROPINSI            | KABUPATEN                      | KELEMBAGAAN          |                                 |                                    |                     |                     |                |                                 |                          |                    |                          |                           |                                 | TOTAL<br>SCORE |
|-----|---------------------|--------------------------------|----------------------|---------------------------------|------------------------------------|---------------------|---------------------|----------------|---------------------------------|--------------------------|--------------------|--------------------------|---------------------------|---------------------------------|----------------|
|     |                     |                                | Aparatur & Pelayanan |                                 |                                    | Peraturan<br>Daerah | Keuangan Daerah     |                |                                 | Kepastian Hukum          |                    |                          |                           |                                 |                |
|     |                     |                                | Birokrasi            | Penyalah-<br>gunaan<br>wewenang | Sub Total<br>Aparat &<br>Pelayanan |                     | Retribusi/<br>Pajak | Pemb./<br>APBD | Sub Total<br>Keuangan<br>Daerah | Konsistensi<br>Peraturan | Penegakan<br>Hukum | Pungli Luar<br>Birokrasi | Eksekutif -<br>Legislatif | Sub Total<br>Kepastian<br>Hukum |                |
|     |                     |                                |                      |                                 |                                    |                     |                     |                |                                 |                          |                    |                          |                           |                                 |                |
| 1   | SULAWESI SELATAN    | (8) KAB. JENEPONTO             | 0,0248               | 0,0120                          | 0,0368                             | 0,0217              | 0,0031              | 0,0023         | 0,0054                          | 0,0165                   | 0,0251             | 0,0051                   | 0,0030                    | 0,0497                          | 0,1136         |
| 2   | SUMATERA BARAT      | (11) KAB. SAWAHLUNTO SIJUNJUNG | 0,0248               | 0,0120                          | 0,0368                             | 0,0147              | 0,0051              | 0,0023         | 0,0074                          | 0,0165                   | 0,0251             | 0,0099                   | 0,0030                    | 0,0545                          | 0,1134         |
| 3   | RIAU                | (22) KAB. PELALAWAN            | 0,0248               | 0,0030                          | 0,0278                             | 0,0147              | 0,0132              | 0,0059         | 0,0191                          | 0,0165                   | 0,0251             | 0,0051                   | 0,0030                    | 0,0497                          | 0,1113         |
| 4   | JAWA BARAT          | (18) KAB. CIANJUR              | 0,0248               | 0,0120                          | 0,0368                             | 0,0147              | 0,0051              | 0,0023         | 0,0074                          | 0,0165                   | 0,0251             | 0,0051                   | 0,0030                    | 0,0497                          | 0,1086         |
| 5   | SULAWESI SELATAN    | (6) KAB. ENREKANG              | 0,0248               | 0,0060                          | 0,0308                             | 0,0147              | 0,0051              | 0,0023         | 0,0074                          | 0,0165                   | 0,0251             | 0,0099                   | 0,0030                    | 0,0545                          | 0,1074         |
| 6   | BALI                | (4) KAB. JEMBRANA              | 0,0126               | 0,0120                          | 0,0246                             | 0,0217              | 0,0051              | 0,0009         | 0,0060                          | 0,0165                   | 0,0251             | 0,0099                   | 0,0030                    | 0,0545                          | 0,1068         |
| 7   | KALIMANTAN TENGAH   | (7) KAB. BARITO UTARA          | 0,0248               | 0,0008                          | 0,0256                             | 0,0147              | 0,0051              | 0,0059         | 0,0110                          | 0,0165                   | 0,0251             | 0,0099                   | 0,0030                    | 0,0545                          | 0,1058         |
| 8   | JAWA BARAT          | (9) KAB. TASIKMALAYA           | 0,0248               | 0,0060                          | 0,0308                             | 0,0147              | 0,0031              | 0,0009         | 0,0040                          | 0,0165                   | 0,0251             | 0,0099                   | 0,0030                    | 0,0545                          | 0,1040         |
| 9   | JAMBI               | (20) KAB. TANJUNG JABUNG TIMUR | 0,0248               | 0,0120                          | 0,0368                             | 0,0147              | 0,0051              | 0,0037         | 0,0088                          | 0,0054                   | 0,0251             | 0,0099                   | 0,0030                    | 0,0434                          | 0,1037         |
| 10  | JAWA TIMUR          | (2) KAB. MAGETAN               | 0,0248               | 0,0120                          | 0,0368                             | 0,0046              | 0,0051              | 0,0014         | 0,0065                          | 0,0165                   | 0,0251             | 0,0099                   | 0,0030                    | 0,0545                          | 0,1024         |
| 11  | JAWA BARAT          | (5) KAB. KUNINGAN              | 0,0248               | 0,0030                          | 0,0278                             | 0,0217              | 0,0020              | 0,0009         | 0,0029                          | 0,0165                   | 0,0251             | 0,0051                   | 0,0030                    | 0,0497                          | 0,1021         |
| 12  | BALI                | (21) KAB. TABANAN              | 0,0126               | 0,0060                          | 0,0186                             | 0,0217              | 0,0083              | 0,0023         | 0,0106                          | 0,0165                   | 0,0251             | 0,0051                   | 0,0030                    | 0,0497                          | 0,1006         |
| 13  | BALI                | (13) KAB. BANGLI               | 0,0126               | 0,0120                          | 0,0246                             | 0,0147              | 0,0051              | 0,0014         | 0,0065                          | 0,0165                   | 0,0251             | 0,0099                   | 0,0030                    | 0,0545                          | 0,1003         |
| 14  | NUSA TENGGARA TIMUR | (15) KAB. ENDE                 | 0,0126               | 0,0120                          | 0,0246                             | 0,0147              | 0,0051              | 0,0014         | 0,0065                          | 0,0165                   | 0,0251             | 0,0099                   | 0,0030                    | 0,0545                          | 0,1003         |
| 15  | JAWA BARAT          | (1) KAB. PURWAKARTA            | 0,0248               | 0,0120                          | 0,0368                             | 0,0217              | 0,0083              | 0,0014         | 0,0097                          | 0,0165                   | 0,0070             | 0,0051                   | 0,0030                    | 0,0316                          | 0,0998         |
| 16  | SULAWESI SELATAN    | (14) KAB. SINJAI               | 0,0248               | 0,0060                          | 0,0308                             | 0,0147              | 0,0020              | 0,0023         | 0,0043                          | 0,0165                   | 0,0251             | 0,0051                   | 0,0030                    | 0,0497                          | 0,0995         |
| 17  | KALIMANTAN TIMUR    | (3) KAB. BULUNGAN              | 0,0248               | 0,0060                          | 0,0308                             | 0,0217              | 0,0051              | 0,0059         | 0,0110                          | 0,0054                   | 0,0251             | 0,0025                   | 0,0030                    | 0,0360                          | 0,0995         |
| 18  | KALIMANTAN SELATAN  | (23) KAB. TABALONG             | 0,0126               | 0,0060                          | 0,0186                             | 0,0147              | 0,0132              | 0,0023         | 0,0155                          | 0,0165                   | 0,0251             | 0,0025                   | 0,0030                    | 0,0471                          | 0,0959         |
| 19  | KALIMANTAN SELATAN  | (37) KAB. HULU SUNGAI UTARA    | 0,0126               | 0,0030                          | 0,0156                             | 0,0217              | 0,0051              | 0,0023         | 0,0074                          | 0,0165                   | 0,0251             | 0,0051                   | 0,0030                    | 0,0497                          | 0,0944         |
| 20  | NUSA TENGGARA TIMUR | (75) KAB. TIMOR TENGAH UTARA   | 0,0126               | 0,0120                          | 0,0246                             | 0,0147              | 0,0031              | 0,0037         | 0,0068                          | 0,0165                   | 0,0251             | 0,0025                   | 0,0030                    | 0,0471                          | 0,0932         |
| 21  | BANGKA BELITUNG     | (27) KAB. BELITUNG             | 0,0062               | 0,0120                          | 0,0182                             | 0,0217              | 0,0132              | 0,0014         | 0,0146                          | 0,0095                   | 0,0151             | 0,0099                   | 0,0030                    | 0,0375                          | 0,0920         |
| 22  | SULAWESI TENGAH     | (10) KAB. BANGGAI              | 0,0126               | 0,0126                          | 0,0252                             | 0,0147              | 0,0051              | 0,0023         | 0,0074                          | 0,0165                   | 0,0151             | 0,0099                   | 0,0030                    | 0,0445                          | 0,0918         |
| 23  | SULAWESI TENGAH     | (45) KAB. TOLI TOLI            | 0,0126               | 0,0015                          | 0,0141                             | 0,0147              | 0,0132              | 0,0023         | 0,0155                          | 0,0054                   | 0,0251             | 0,0099                   | 0,0043                    | 0,0447                          | 0,0890         |
| 24  | SULAWESI SELATAN    | (25) KAB. TANA TORAJA          | 0,0248               | 0,0120                          | 0,0368                             | 0,0147              | 0,0051              | 0,0023         | 0,0074                          | 0,0054                   | 0,0151             | 0,0051                   | 0,0043                    | 0,0299                          | 0,0888         |

| NO. | PROPINSI            | KABUPATEN                        | KELEMBAGAAN          |                                 |                                    |                     |                     |                |                                 |                          |                    |                          |                           |                                 | TOTAL<br>SCORE |
|-----|---------------------|----------------------------------|----------------------|---------------------------------|------------------------------------|---------------------|---------------------|----------------|---------------------------------|--------------------------|--------------------|--------------------------|---------------------------|---------------------------------|----------------|
|     |                     |                                  | Aparatur & Pelayanan |                                 |                                    | Peraturan<br>Daerah | Keuangan Daerah     |                |                                 | Kepastian Hukum          |                    |                          |                           |                                 |                |
|     |                     |                                  | Birokrasi            | Penyalah-<br>gunaan<br>wewenang | Sub Total<br>Aparat &<br>Pelayanan |                     | Retribusi/<br>Pajak | Pemb./<br>APBD | Sub Total<br>Keuangan<br>Daerah | Konsistensi<br>Peraturan | Penegakan<br>Hukum | Pungli Luar<br>Birokrasi | Eksekutif -<br>Legislatif | Sub Total<br>Kepastian<br>Hukum |                |
|     |                     |                                  |                      |                                 |                                    |                     |                     |                |                                 |                          |                    |                          |                           |                                 |                |
| 25  | NUSA TENGGARA TIMUR | (43) KAB. TIMOR TENGAH SELATAN   | 0,0062               | 0,0120                          | 0,0182                             | 0,0147              | 0,0031              | 0,0037         | 0,0068                          | 0,0095                   | 0,0251             | 0,0099                   | 0,0030                    | 0,0475                          | 0,0872         |
| 26  | KALIMANTAN TIMUR    | (17) KAB. NUNUKAN                | 0,0248               | 0,0060                          | 0,0308                             | 0,0046              | 0,0051              | 0,0059         | 0,0110                          | 0,0095                   | 0,0251             | 0,0025                   | 0,0030                    | 0,0401                          | 0,0865         |
| 27  | NUSA TENGGARA TIMUR | (26) KAB. BELU                   | 0,0126               | 0,0120                          | 0,0246                             | 0,0046              | 0,0083              | 0,0023         | 0,0106                          | 0,0095                   | 0,0251             | 0,0051                   | 0,0030                    | 0,0427                          | 0,0825         |
| 28  | BALI                | (30) KAB. GIANYAR                | 0,0126               | 0,0120                          | 0,0246                             | 0,0147              | 0,0132              | 0,0037         | 0,0169                          | 0,0054                   | 0,0070             | 0,0099                   | 0,0030                    | 0,0253                          | 0,0815         |
| 29  | RIAU                | (42) KAB. ROKAN HULU             | 0,0248               | 0,0030                          | 0,0278                             | 0,0147              | 0,0020              | 0,0059         | 0,0079                          | 0,0095                   | 0,0151             | 0,0025                   | 0,0030                    | 0,0301                          | 0,0805         |
| 30  | PAPUA               | (31) KAB. MANOKWARI              | 0,0248               | 0,0030                          | 0,0278                             | 0,0046              | 0,0051              | 0,0059         | 0,0110                          | 0,0165                   | 0,0151             | 0,0025                   | 0,0030                    | 0,0371                          | 0,0805         |
| 31  | SULAWESI SELATAN    | (21) KAB. PANGKAJENE & KEPULAUAN | 0,0126               | 0,0030                          | 0,0156                             | 0,0147              | 0,0132              | 0,0037         | 0,0169                          | 0,0095                   | 0,0151             | 0,0051                   | 0,0030                    | 0,0327                          | 0,0799         |
| 32  | J A M B I           | (39) KAB. BATANGHARI             | 0,0248               | 0,0060                          | 0,0308                             | 0,0147              | 0,0020              | 0,0037         | 0,0057                          | 0,0054                   | 0,0151             | 0,0051                   | 0,0030                    | 0,0286                          | 0,0798         |
| 33  | JAWA TIMUR          | (73) KAB. BLITAR                 | 0,0126               | 0,0060                          | 0,0186                             | 0,0046              | 0,0051              | 0,0009         | 0,0060                          | 0,0165                   | 0,0251             | 0,0051                   | 0,0030                    | 0,0497                          | 0,0789         |
| 34  | JAMBI               | (68) KAB. TEBO                   | 0,0126               | 0,0030                          | 0,0156                             | 0,0147              | 0,0020              | 0,0059         | 0,0079                          | 0,0095                   | 0,0251             | 0,0025                   | 0,0030                    | 0,0401                          | 0,0783         |
| 35  | SULAWESI UTARA      | (16) KAB. SANGIHE                | 0,0126               | 0,0120                          | 0,0246                             | 0,0046              | 0,0020              | 0,0009         | 0,0029                          | 0,0165                   | 0,0151             | 0,0099                   | 0,0030                    | 0,0445                          | 0,0766         |
| 36  | SUMATERA UTARA      | (38) KAB. LABUHAN BATU           | 0,0062               | 0,0060                          | 0,0122                             | 0,0147              | 0,0083              | 0,0023         | 0,0106                          | 0,0095                   | 0,0251             | 0,0012                   | 0,0030                    | 0,0388                          | 0,0763         |
| 37  | SUMATERA SELATAN    | (76) KAB. MUSI BANYUASIN         | 0,0126               | 0,0030                          | 0,0156                             | 0,0147              | 0,0132              | 0,0059         | 0,0191                          | 0,0054                   | 0,0151             | 0,0025                   | 0,0030                    | 0,0260                          | 0,0754         |
| 38  | BANTEN              | (47) KAB. LEBAK                  | 0,0126               | 0,0030                          | 0,0156                             | 0,0147              | 0,0020              | 0,0023         | 0,0043                          | 0,0095                   | 0,0251             | 0,0025                   | 0,0030                    | 0,0401                          | 0,0747         |
| 39  | BALI                | (34) KAB. BADUNG                 | 0,0062               | 0,0120                          | 0,0182                             | 0,0147              | 0,0132              | 0,0059         | 0,0191                          | 0,0054                   | 0,0070             | 0,0051                   | 0,0030                    | 0,0205                          | 0,0725         |
| 40  | KALIMANTAN TIMUR    | (53) KAB. PASIR                  | 0,0126               | 0,0008                          | 0,0134                             | 0,0217              | 0,0083              | 0,0059         | 0,0142                          | 0,0095                   | 0,0070             | 0,0025                   | 0,0030                    | 0,0220                          | 0,0713         |
| 41  | BALI                | (48) KAB. KARANG ASEM            | 0,0062               | 0,0120                          | 0,0182                             | 0,0046              | 0,0132              | 0,0023         | 0,0155                          | 0,0095                   | 0,0151             | 0,0051                   | 0,0030                    | 0,0327                          | 0,0710         |
| 42  | KALIMANTAN TENGAH   | (29) KAB. KAPUAS                 | 0,0126               | 0,0120                          | 0,0246                             | 0,0046              | 0,0051              | 0,0037         | 0,0088                          | 0,0095                   | 0,0151             | 0,0051                   | 0,0030                    | 0,0327                          | 0,0707         |
| 43  | SUMATERA BARAT      | (62) KAB. PASAMAN                | 0,0126               | 0,0030                          | 0,0156                             | 0,0147              | 0,0031              | 0,0023         | 0,0054                          | 0,0095                   | 0,0151             | 0,0051                   | 0,0043                    | 0,0340                          | 0,0697         |
| 44  | LAMPUNG             | (64) KAB. WAY KANAN              | 0,0062               | 0,0120                          | 0,0182                             | 0,0147              | 0,0051              | 0,0059         | 0,0110                          | 0,0054                   | 0,0070             | 0,0099                   | 0,0030                    | 0,0253                          | 0,0692         |
| 45  | LAMPUNG             | (59) KAB. LAMPUNG BARAT          | 0,0062               | 0,0030                          | 0,0092                             | 0,0147              | 0,0083              | 0,0037         | 0,0120                          | 0,0095                   | 0,0151             | 0,0051                   | 0,0030                    | 0,0327                          | 0,0686         |
| 46  | SUMATERA UTARA      | (56) KAB. DAIRI                  | 0,0062               | 0,0120                          | 0,0182                             | 0,0147              | 0,0031              | 0,0023         | 0,0054                          | 0,0095                   | 0,0151             | 0,0025                   | 0,0030                    | 0,0301                          | 0,0684         |
| 47  | SULAWESI SELATAN    | (63) KAB. BARRU                  | 0,0126               | 0,0030                          | 0,0156                             | 0,0217              | 0,0051              | 0,0037         | 0,0088                          | 0,0054                   | 0,0070             | 0,0051                   | 0,0030                    | 0,0205                          | 0,0666         |
| 48  | R I A U             | (50) KAB. KAMPAR                 | 0,0062               | 0,0030                          | 0,0092                             | 0,0147              | 0,0051              | 0,0059         | 0,0110                          | 0,0095                   | 0,0151             | 0,0025                   | 0,0043                    | 0,0314                          | 0,0663         |
| 49  | J A M B I           | (90) KAB. BUNGO                  | 0,0126               | 0,0120                          | 0,0246                             | 0,0046              | 0,0020              | 0,0023         | 0,0043                          | 0,0095                   | 0,0151             | 0,0051                   | 0,0030                    | 0,0327                          | 0,0662         |
| 50  | JAWA BARAT          | (12) KAB. INDRAMAYU              | 0,0126               | 0,0120                          | 0,0246                             | 0,0046              | 0,0083              | 0,0023         | 0,0106                          | 0,0054                   | 0,0151             | 0,0025                   | 0,0030                    | 0,0260                          | 0,0658         |
| 51  | SUMATERA SELATAN    | (88) KAB. MUSI RAWAS             | 0,0126               | 0,0008                          | 0,0134                             | 0,0217              | 0,0031              | 0,0059         | 0,0090                          | 0,0095                   | 0,0070             | 0,0012                   | 0,0030                    | 0,0207                          | 0,0648         |

| NO.    | PROPINSI            | KABUPATEN                   | KELEMBAGAAN          |                                 |                                    |                     |                     |                |                                 |                          |                    |                          |                           |                                 | TOTAL<br>SCORE |
|--------|---------------------|-----------------------------|----------------------|---------------------------------|------------------------------------|---------------------|---------------------|----------------|---------------------------------|--------------------------|--------------------|--------------------------|---------------------------|---------------------------------|----------------|
|        |                     |                             | Aparatur & Pelayanan |                                 |                                    | Peraturan<br>Daerah | Keuangan Daerah     |                |                                 | Kepastian Hukum          |                    |                          |                           |                                 |                |
|        |                     |                             | Birokrasi            | Penyalah-<br>gunaan<br>wewenang | Sub Total<br>Aparat &<br>Pelayanan |                     | Retribusi/<br>Pajak | Pemb./<br>APBD | Sub Total<br>Keuangan<br>Daerah | Konsistensi<br>Peraturan | Penegakan<br>Hukum | Pungli Luar<br>Birokrasi | Eksekutif -<br>Legislatif | Sub Total<br>Kepastian<br>Hukum |                |
|        |                     |                             |                      |                                 |                                    |                     |                     |                |                                 |                          |                    |                          |                           |                                 |                |
| 0.0483 | 0.0235              | 0.0771                      | 0.0316               | 0.0141                          | 0.035                              | 0.0524              | 0.0194              | 0.0167         | 0.3181                          |                          |                    |                          |                           |                                 |                |
| 52     | BALI                | (52) KAB. BULELENG          | 0,0062               | 0,0030                          | 0,0092                             | 0,0147              | 0,0083              | 0,0009         | 0,0092                          | 0,0095                   | 0,0151             | 0,0025                   | 0,0043                    | 0,0314                          | 0,0645         |
| 53     | SULAWESI SELATAN    | (24) KAB. BANTAENG          | 0,0126               | 0,0030                          | 0,0156                             | 0,0147              | 0,0031              | 0,0037         | 0,0068                          | 0,0095                   | 0,0070             | 0,0051                   | 0,0030                    | 0,0246                          | 0,0617         |
| 54     | JAWA TENGAH         | (75) KAB. BOYOLALI          | 0,0062               | 0,0120                          | 0,0182                             | 0,0147              | 0,0020              | 0,0009         | 0,0029                          | 0,0054                   | 0,0070             | 0,0099                   | 0,0030                    | 0,0253                          | 0,0611         |
| 55     | SUMATERA BARAT      | (49) KAB. SOLOK             | 0,0062               | 0,0030                          | 0,0092                             | 0,0217              | 0,0051              | 0,0023         | 0,0074                          | 0,0054                   | 0,0070             | 0,0051                   | 0,0043                    | 0,0218                          | 0,0601         |
| 56     | SULAWESI SELATAN    | (19) KAB. GOWA              | 0,0062               | 0,0030                          | 0,0092                             | 0,0217              | 0,0083              | 0,0023         | 0,0106                          | 0,0054                   | 0,0070             | 0,0025                   | 0,0030                    | 0,0179                          | 0,0594         |
| 57     | SUMATERA SELATAN    | (40) KAB. LAHAT             | 0,0062               | 0,0030                          | 0,0092                             | 0,0217              | 0,0051              | 0,0014         | 0,0065                          | 0,0095                   | 0,0070             | 0,0025                   | 0,0030                    | 0,0220                          | 0,0594         |
| 58     | SULAWESI UTARA      | (20) KAB. MINAHASA          | 0,0062               | 0,0015                          | 0,0077                             | 0,0147              | 0,0051              | 0,0009         | 0,0060                          | 0,0095                   | 0,0151             | 0,0025                   | 0,0030                    | 0,0301                          | 0,0585         |
| 59     | NUSA TENGGARA TIMUR | (115) KAB. MANGGARAI        | 0,0126               | 0,0015                          | 0,0141                             | 0,0147              | 0,0051              | 0,0023         | 0,0074                          | 0,0054                   | 0,0070             | 0,0025                   | 0,0072                    | 0,0221                          | 0,0583         |
| 60     | BANGKA BELITUNG     | (61) KAB. BANGKA            | 0,0016               | 0,0120                          | 0,0136                             | 0,0147              | 0,0083              | 0,0037         | 0,0120                          | 0,0054                   | 0,0070             | 0,0025                   | 0,0030                    | 0,0179                          | 0,0582         |
| 61     | SULAWESI SELATAN    | (36) KAB. MAROS             | 0,0126               | 0,0015                          | 0,0141                             | 0,0147              | 0,0083              | 0,0023         | 0,0106                          | 0,0054                   | 0,0070             | 0,0025                   | 0,0030                    | 0,0179                          | 0,0573         |
| 62     | SULAWESI SELATAN    | (69) KAB. SELAYAR           | 0,0126               | 0,0030                          | 0,0156                             | 0,0147              | 0,0051              | 0,0037         | 0,0088                          | 0,0024                   | 0,0070             | 0,0051                   | 0,0030                    | 0,0175                          | 0,0566         |
| 63     | SULAWESI SELATAN    | (60) KAB. PINRANG           | 0,0062               | 0,0060                          | 0,0122                             | 0,0147              | 0,0051              | 0,0023         | 0,0074                          | 0,0095                   | 0,0070             | 0,0025                   | 0,0030                    | 0,0220                          | 0,0563         |
| 64     | J A M B I           | (79) KAB. KERINCI           | 0,0062               | 0,0030                          | 0,0092                             | 0,0217              | 0,0051              | 0,0023         | 0,0074                          | 0,0054                   | 0,0070             | 0,0025                   | 0,0030                    | 0,0179                          | 0,0562         |
| 65     | JAWA TIMUR          | (55) KAB. SIDOARJO          | 0,0126               | 0,0030                          | 0,0156                             | 0,0217              | 0,0051              | 0,0023         | 0,0074                          | 0,0024                   | 0,0034             | 0,0025                   | 0,0030                    | 0,0113                          | 0,0560         |
| 66     | SULAWESI SELATAN    | (101) KAB. LUWU             | 0,0062               | 0,0008                          | 0,0070                             | 0,0217              | 0,0020              | 0,0023         | 0,0043                          | 0,0095                   | 0,0070             | 0,0012                   | 0,0043                    | 0,0220                          | 0,0550         |
| 67     | SULAWESI SELATAN    | (28) KAB. LUWU UTARA        | 0,0062               | 0,0008                          | 0,0070                             | 0,0046              | 0,0132              | 0,0023         | 0,0155                          | 0,0095                   | 0,0070             | 0,0025                   | 0,0072                    | 0,0262                          | 0,0533         |
| 68     | BENGKULU            | (127) KAB. BENGKULU SELATAN | 0,0062               | 0,0030                          | 0,0092                             | 0,0046              | 0,0051              | 0,0009         | 0,0060                          | 0,0054                   | 0,0151             | 0,0099                   | 0,0030                    | 0,0334                          | 0,0532         |
| 69     | JAWA BARAT          | (57) KAB. CIAMIS            | 0,0062               | 0,0030                          | 0,0092                             | 0,0147              | 0,0020              | 0,0009         | 0,0029                          | 0,0054                   | 0,0151             | 0,0025                   | 0,0030                    | 0,0260                          | 0,0528         |
| 70     | KALIMANTAN TIMUR    | (82) KAB. KUTAI KERTANEGARA | 0,0126               | 0,0030                          | 0,0156                             | 0,0046              | 0,0083              | 0,0059         | 0,0142                          | 0,0054                   | 0,0070             | 0,0025                   | 0,0030                    | 0,0179                          | 0,0523         |
| 71     | PAPUA               | (46) KAB. SORONG            | 0,0062               | 0,0030                          | 0,0092                             | 0,0147              | 0,0020              | 0,0023         | 0,0043                          | 0,0054                   | 0,0151             | 0,0006                   | 0,0030                    | 0,0241                          | 0,0523         |
| 72     | KALIMANTAN BARAT    | (85) KAB. SAMBAS            | 0,0062               | 0,0060                          | 0,0122                             | 0,0147              | 0,0051              | 0,0023         | 0,0074                          | 0,0054                   | 0,0070             | 0,0025                   | 0,0030                    | 0,0179                          | 0,0522         |
| 73     | SUMATERA SELATAN    | (67) KAB. MUARA ENIM        | 0,0062               | 0,0015                          | 0,0077                             | 0,0147              | 0,0132              | 0,0023         | 0,0155                          | 0,0024                   | 0,0070             | 0,0012                   | 0,0030                    | 0,0136                          | 0,0515         |
| 74     | SUMATERA UTARA      | (44) KAB. ASAHAN            | 0,0016               | 0,0008                          | 0,0024                             | 0,0217              | 0,0132              | 0,0023         | 0,0155                          | 0,0012                   | 0,0070             | 0,0006                   | 0,0030                    | 0,0118                          | 0,0514         |
| 75     | JAWA BARAT          | (89) KAB. CIREBON           | 0,0126               | 0,0030                          | 0,0156                             | 0,0046              | 0,0083              | 0,0023         | 0,0106                          | 0,0054                   | 0,0070             | 0,0051                   | 0,0030                    | 0,0205                          | 0,0513         |
| 76     | R I A U             | (70) KAB. BENGKALIS         | 0,0016               | 0,0030                          | 0,0046                             | 0,0147              | 0,0132              | 0,0059         | 0,0191                          | 0,0054                   | 0,0018             | 0,0025                   | 0,0030                    | 0,0127                          | 0,0511         |
| 77     | JAWA BARAT          | (71) KAB. GARUT             | 0,0062               | 0,0030                          | 0,0092                             | 0,0147              | 0,0051              | 0,0009         | 0,0060                          | 0,0054                   | 0,0070             | 0,0051                   | 0,0030                    | 0,0205                          | 0,0504         |
| 78     | NUSA TENGGARA BARAT | (93) KAB. LOMBOK TIMUR      | 0,0062               | 0,0030                          | 0,0092                             | 0,0147              | 0,0020              | 0,0023         | 0,0043                          | 0,0054                   | 0,0070             | 0,0025                   | 0,0072                    | 0,0221                          | 0,0503         |

| NO. | PROPINSI            | KABUPATEN                  | KELEMBAGAAN          |                          |                              |                  |                  |             |                           |                       |                 |                       |                        |                           | TOTAL SCORE |
|-----|---------------------|----------------------------|----------------------|--------------------------|------------------------------|------------------|------------------|-------------|---------------------------|-----------------------|-----------------|-----------------------|------------------------|---------------------------|-------------|
|     |                     |                            | Aparatur & Pelayanan |                          |                              | Peraturan Daerah | Keuangan Daerah  |             |                           | Kepastian Hukum       |                 |                       |                        |                           |             |
|     |                     |                            | Birokrasi            | Penyalah-gunaan wewenang | Sub Total Aparat & Pelayanan |                  | Retribusi/ Pajak | Pemb./ APBD | Sub Total Keuangan Daerah | Konsistensi Peraturan | Penegakan Hukum | Pungli Luar Birokrasi | Eksekutif - Legislatif | Sub Total Kepastian Hukum |             |
|     |                     |                            |                      |                          |                              |                  |                  |             |                           |                       |                 |                       |                        |                           |             |
| 79  | NUSA TENGGARA BARAT | (123) KAB. DOMPU           | 0,0062               | 0,0015                   | 0,0077                       | 0,0147           | 0,0051           | 0,0023      | 0,0074                    | 0,0054                | 0,0070          | 0,0051                | 0,0030                 | 0,0205                    | 0,0503      |
| 80  | SULAWESI TENGGARA   | (33) KAB. KOLAKA           | 0,0062               | 0,0030                   | 0,0092                       | 0,0046           | 0,0083           | 0,0023      | 0,0106                    | 0,0054                | 0,0070          | 0,0099                | 0,0030                 | 0,0253                    | 0,0497      |
| 81  | NUSA TENGGARA TIMUR | (120) KAB. SUMBA BARAT     | 0,0126               | 0,0030                   | 0,0156                       | 0,0046           | 0,0031           | 0,0023      | 0,0054                    | 0,0165                | 0,0034          | 0,0012                | 0,0030                 | 0,0241                    | 0,0497      |
| 82  | SULAWESI TENGAH     | (84) KAB. DONGGALA         | 0,0062               | 0,0060                   | 0,0122                       | 0,0147           | 0,0083           | 0,0009      | 0,0092                    | 0,0024                | 0,0070          | 0,0006                | 0,0030                 | 0,0130                    | 0,0491      |
| 83  | KALIMANTAN TIMUR    | (66) KAB. KUTAI TIMUR      | 0,0062               | 0,0060                   | 0,0122                       | 0,0046           | 0,0083           | 0,0059      | 0,0142                    | 0,0054                | 0,0070          | 0,0025                | 0,0030                 | 0,0179                    | 0,0489      |
| 84  | NUSA TENGGARA BARAT | (141) KAB. BIMA            | 0,0062               | 0,0030                   | 0,0092                       | 0,0147           | 0,0083           | 0,0014      | 0,0097                    | 0,0024                | 0,0070          | 0,0025                | 0,0030                 | 0,0149                    | 0,0485      |
| 85  | BANTEN              | (94) KAB. SERANG           | 0,0062               | 0,0030                   | 0,0092                       | 0,0147           | 0,0051           | 0,0014      | 0,0065                    | 0,0054                | 0,0070          | 0,0025                | 0,0030                 | 0,0179                    | 0,0483      |
| 86  | JAWA TIMUR          | (118) KAB. LAMONGAN        | 0,0062               | 0,0030                   | 0,0092                       | 0,0147           | 0,0051           | 0,0014      | 0,0065                    | 0,0054                | 0,0070          | 0,0025                | 0,0030                 | 0,0179                    | 0,0483      |
| 87  | JAWA TENGAH         | (92) KAB. KLATEN           | 0,0031               | 0,0008                   | 0,0039                       | 0,0147           | 0,0083           | 0,0009      | 0,0092                    | 0,0054                | 0,0070          | 0,0006                | 0,0072                 | 0,0202                    | 0,0480      |
| 88  | JAWA TENGAH         | (102) KAB. KARANG ANYAR    | 0,0062               | 0,0030                   | 0,0092                       | 0,0147           | 0,0051           | 0,0009      | 0,0060                    | 0,0054                | 0,0070          | 0,0025                | 0,0030                 | 0,0179                    | 0,0478      |
| 89  | JAWA TENGAH         | (41) KAB. TEGAL            | 0,0062               | 0,0030                   | 0,0092                       | 0,0147           | 0,0031           | 0,0023      | 0,0054                    | 0,0054                | 0,0070          | 0,0025                | 0,0030                 | 0,0179                    | 0,0472      |
| 90  | JAWA TENGAH         | (114) KAB. KEBUMEN         | 0,0062               | 0,0030                   | 0,0092                       | 0,0147           | 0,0051           | 0,0014      | 0,0065                    | 0,0054                | 0,0070          | 0,0012                | 0,0030                 | 0,0166                    | 0,0470      |
| 91  | JAWA TIMUR          | (98) KAB. JOMBANG          | 0,0031               | 0,0030                   | 0,0061                       | 0,0046           | 0,0051           | 0,0023      | 0,0074                    | 0,0054                | 0,0151          | 0,0051                | 0,0030                 | 0,0286                    | 0,0467      |
| 92  | SUMATERA BARAT      | (35) KAB. PESISIR SELATAN  | 0,0126               | 0,0015                   | 0,0141                       | 0,0046           | 0,0020           | 0,0014      | 0,0034                    | 0,0095                | 0,0070          | 0,0051                | 0,0030                 | 0,0246                    | 0,0467      |
| 93  | SULAWESI TENGGARA   | (111) KAB. BUTON           | 0,0062               | 0,0015                   | 0,0077                       | 0,0217           | 0,0020           | 0,0023      | 0,0043                    | 0,0024                | 0,0070          | 0,0006                | 0,0030                 | 0,0130                    | 0,0467      |
| 94  | BANTEN              | (65) KAB. TANGERANG        | 0,0016               | 0,0030                   | 0,0046                       | 0,0217           | 0,0083           | 0,0023      | 0,0106                    | 0,0024                | 0,0018          | 0,0025                | 0,0030                 | 0,0097                    | 0,0466      |
| 95  | KALIMANTAN TENGAH   | (95) KAB. BARITO SELATAN   | 0,0062               | 0,0015                   | 0,0077                       | 0,0147           | 0,0051           | 0,0059      | 0,0110                    | 0,0024                | 0,0070          | 0,0006                | 0,0030                 | 0,0130                    | 0,0464      |
| 96  | DI. YOGYAKARTA      | (121) KAB. GUNUNG KIDUL    | 0,0031               | 0,0030                   | 0,0061                       | 0,0147           | 0,0020           | 0,0014      | 0,0034                    | 0,0095                | 0,0070          | 0,0025                | 0,0030                 | 0,0220                    | 0,0462      |
| 97  | JAWA BARAT          | (105) KAB. BANDUNG         | 0,0031               | 0,0015                   | 0,0046                       | 0,0147           | 0,0083           | 0,0023      | 0,0106                    | 0,0054                | 0,0070          | 0,0006                | 0,0030                 | 0,0160                    | 0,0459      |
| 98  | JAWA TIMUR          | (83) KAB. KEDIRI           | 0,0016               | 0,0120                   | 0,0136                       | 0,0147           | 0,0051           | 0,0014      | 0,0065                    | 0,0012                | 0,0018          | 0,0051                | 0,0030                 | 0,0111                    | 0,0459      |
| 99  | JAWA TENGAH         | (51) KAB. CILACAP          | 0,0062               | 0,0030                   | 0,0092                       | 0,0147           | 0,0083           | 0,0014      | 0,0097                    | 0,0054                | 0,0018          | 0,0012                | 0,0030                 | 0,0114                    | 0,0450      |
| 100 | JAWA TIMUR          | (134) KAB. BANGKALAN       | 0,0062               | 0,0008                   | 0,0070                       | 0,0147           | 0,0051           | 0,0014      | 0,0065                    | 0,0054                | 0,0070          | 0,0012                | 0,0030                 | 0,0166                    | 0,0448      |
| 101 | R I A U             | (101) KAB. INDRAGIRI HILIR | 0,0062               | 0,0008                   | 0,0070                       | 0,0217           | 0,0020           | 0,0059      | 0,0079                    | 0,0012                | 0,0034          | 0,0006                | 0,0030                 | 0,0082                    | 0,0448      |
| 102 | SUMATERA UTARA      | (91) KAB. LANGKAT          | 0,0016               | 0,0008                   | 0,0024                       | 0,0147           | 0,0132           | 0,0023      | 0,0155                    | 0,0012                | 0,0070          | 0,0006                | 0,0030                 | 0,0118                    | 0,0444      |
| 103 | KALIMANTAN TIMUR    | (81) KAB. BERAU            | 0,0062               | 0,0015                   | 0,0077                       | 0,0147           | 0,0083           | 0,0059      | 0,0142                    | 0,0024                | 0,0018          | 0,0006                | 0,0030                 | 0,0078                    | 0,0444      |
| 104 | PAPUA               | (117)KAB. JAYAWIJAYA       | 0,0062               | 0,0015                   | 0,0077                       | 0,0147           | 0,0051           | 0,0037      | 0,0088                    | 0,0024                | 0,0070          | 0,0006                | 0,0030                 | 0,0130                    | 0,0442      |
| 105 | RIAU                | (81) KAB. KUANTAN SENGGIGI | 0,0062               | 0,0015                   | 0,0077                       | 0,0147           | 0,0020           | 0,0059      | 0,0079                    | 0,0012                | 0,0070          | 0,0012                | 0,0043                 | 0,0137                    | 0,0440      |

| NO.    | PROPINSI            | KABUPATEN                      | KELEMBAGAAN          |                                 |                                    |                     |                     |                |                                 |                          |                    |                          |                           |                                 | TOTAL<br>SCORE |
|--------|---------------------|--------------------------------|----------------------|---------------------------------|------------------------------------|---------------------|---------------------|----------------|---------------------------------|--------------------------|--------------------|--------------------------|---------------------------|---------------------------------|----------------|
|        |                     |                                | Aparatur & Pelayanan |                                 |                                    | Peraturan<br>Daerah | Keuangan Daerah     |                |                                 | Kepastian Hukum          |                    |                          |                           |                                 |                |
|        |                     |                                | Birokrasi            | Penyalah-<br>gunaan<br>wewenang | Sub Total<br>Aparat &<br>Pelayanan |                     | Retribusi/<br>Pajak | Pemb./<br>APBD | Sub Total<br>Keuangan<br>Daerah | Konsistensi<br>Peraturan | Penegakan<br>Hukum | Pungli Luar<br>Birokrasi | Eksekutif -<br>Legislatif | Sub Total<br>Kepastian<br>Hukum |                |
|        |                     |                                |                      |                                 |                                    |                     |                     |                |                                 |                          |                    |                          |                           |                                 |                |
| 0.0483 | 0.0235              |                                | 0.0771               | 0.0316                          | 0.0141                             |                     | 0.035               | 0.0524         | 0.0194                          | 0.0167                   |                    | 0.3181                   |                           |                                 |                |
| 106    | JAWA BARAT          | (32) KAB. BEKASI               | 0,0062               | 0,0030                          | 0,0092                             | 0,0046              | 0,0083              | 0,0037         | 0,0120                          | 0,0054                   | 0,0070             | 0,0025                   | 0,0030                    | 0,0179                          | 0,0437         |
| 107    | KALIMANTAN SELATAN  | (112) KAB. HULU SUNGAI TENGAH  | 0,0062               | 0,0015                          | 0,0077                             | 0,0147              | 0,0051              | 0,0023         | 0,0074                          | 0,0024                   | 0,0070             | 0,0006                   | 0,0030                    | 0,0130                          | 0,0428         |
| 108    | PAPUA               | (116) KAB. MIMIKA              | 0,0062               | 0,0015                          | 0,0077                             | 0,0046              | 0,0132              | 0,0037         | 0,0169                          | 0,0024                   | 0,0070             | 0,0006                   | 0,0030                    | 0,0130                          | 0,0422         |
| 109    | JAWA TIMUR          | (135) KAB. PASURUAN            | 0,0016               | 0,0015                          | 0,0031                             | 0,0147              | 0,0132              | 0,0023         | 0,0155                          | 0,0012                   | 0,0018             | 0,0025                   | 0,0030                    | 0,0085                          | 0,0418         |
| 110    | LAMPUNG             | (10) KAB. LAMPUNG UTARA        | 0,0062               | 0,0060                          | 0,0122                             | 0,0046              | 0,0051              | 0,0023         | 0,0074                          | 0,0024                   | 0,0070             | 0,0051                   | 0,0030                    | 0,0175                          | 0,0417         |
| 111    | JAWA TENGAH         | (134) KAB. PEMALANG            | 0,0031               | 0,0030                          | 0,0061                             | 0,0147              | 0,0051              | 0,0009         | 0,0060                          | 0,0054                   | 0,0034             | 0,0025                   | 0,0030                    | 0,0143                          | 0,0411         |
| 112    | SUMATERA UTARA      | (54) KAB. TAPANULI UTARA       | 0,0016               | 0,0015                          | 0,0031                             | 0,0147              | 0,0020              | 0,0023         | 0,0043                          | 0,0024                   | 0,0034             | 0,0099                   | 0,0030                    | 0,0187                          | 0,0408         |
| 113    | SULAWESI TENGAH     | (119) KAB. POSO                | 0,0062               | 0,0015                          | 0,0077                             | 0,0147              | 0,0031              | 0,0023         | 0,0054                          | 0,0024                   | 0,0070             | 0,0006                   | 0,0030                    | 0,0130                          | 0,0408         |
| 114    | JAWA TENGAH         | (87) KAB. KUDUS                | 0,0062               | 0,0015                          | 0,0077                             | 0,0147              | 0,0031              | 0,0023         | 0,0054                          | 0,0054                   | 0,0034             | 0,0006                   | 0,0030                    | 0,0124                          | 0,0402         |
| 115    | JAWA TIMUR          | (58) KAB. GRESIK               | 0,0031               | 0,0015                          | 0,0046                             | 0,0046              | 0,0132              | 0,0014         | 0,0146                          | 0,0054                   | 0,0070             | 0,0006                   | 0,0030                    | 0,0160                          | 0,0398         |
| 116    | KALIMANTAN SELATAN  | (109) KAB. HULU SUNGAI SELATAN | 0,0062               | 0,0015                          | 0,0077                             | 0,0147              | 0,0020              | 0,0023         | 0,0043                          | 0,0024                   | 0,0070             | 0,0006                   | 0,0030                    | 0,0130                          | 0,0397         |
| 117    | SULAWESI TENGAH     | (99) KAB. MOROWALI             | 0,0016               | 0,0015                          | 0,0031                             | 0,0147              | 0,0031              | 0,0037         | 0,0068                          | 0,0024                   | 0,0070             | 0,0025                   | 0,0030                    | 0,0149                          | 0,0395         |
| 118    | NUSA TENGGARA TIMUR | (128) KAB. NGADA               | 0,0062               | 0,0030                          | 0,0092                             | 0,0147              | 0,0020              | 0,0023         | 0,0043                          | 0,0024                   | 0,0034             | 0,0025                   | 0,0030                    | 0,0113                          | 0,0395         |
| 119    | SUMATERA UTARA      | (104) KAB. SIMALUNGUN          | 0,0016               | 0,0008                          | 0,0024                             | 0,0147              | 0,0083              | 0,0023         | 0,0106                          | 0,0012                   | 0,0070             | 0,0006                   | 0,0030                    | 0,0118                          | 0,0395         |
| 120    | JAWA TIMUR          | (133) KAB. BANYUWANGI          | 0,0031               | 0,0015                          | 0,0046                             | 0,0147              | 0,0051              | 0,0014         | 0,0065                          | 0,0024                   | 0,0018             | 0,0012                   | 0,0072                    | 0,0126                          | 0,0384         |
| 121    | JAWA TENGAH         | (96) KAB. KENDAL               | 0,0062               | 0,0008                          | 0,0070                             | 0,0046              | 0,0051              | 0,0009         | 0,0060                          | 0,0054                   | 0,0070             | 0,0006                   | 0,0072                    | 0,0202                          | 0,0378         |
| 122    | JAWA BARAT          | (100) KAB. SUMEDANG            | 0,0062               | 0,0030                          | 0,0092                             | 0,0046              | 0,0051              | 0,0009         | 0,0060                          | 0,0054                   | 0,0070             | 0,0025                   | 0,0030                    | 0,0179                          | 0,0377         |
| 123    | JAWA TENGAH         | (129) KAB. JEPARA              | 0,0062               | 0,0015                          | 0,0077                             | 0,0147              | 0,0031              | 0,0023         | 0,0054                          | 0,0024                   | 0,0034             | 0,0006                   | 0,0030                    | 0,0094                          | 0,0372         |
| 124    | SUMATERA SELATAN    | (125) KAB. OGAN KOMERING ILIR  | 0,0062               | 0,0015                          | 0,0077                             | 0,0046              | 0,0051              | 0,0037         | 0,0088                          | 0,0054                   | 0,0070             | 0,0006                   | 0,0030                    | 0,0160                          | 0,0371         |
| 125    | JAWA TENGAH         | (136) KAB. BANYUMAS            | 0,0031               | 0,0015                          | 0,0046                             | 0,0147              | 0,0031              | 0,0009         | 0,0040                          | 0,0024                   | 0,0070             | 0,0012                   | 0,0030                    | 0,0136                          | 0,0369         |
| 126    | SULAWESI SELATAN    | (80) KAB. BONE                 | 0,0031               | 0,0060                          | 0,0091                             | 0,0147              | 0,0020              | 0,0009         | 0,0029                          | 0,0012                   | 0,0018             | 0,0025                   | 0,0043                    | 0,0098                          | 0,0365         |
| 127    | KALIMANTAN SELATAN  | (130) KAB. TANAH LAUT          | 0,0016               | 0,0008                          | 0,0024                             | 0,0147              | 0,0051              | 0,0023         | 0,0074                          | 0,0024                   | 0,0018             | 0,0006                   | 0,0072                    | 0,0120                          | 0,0365         |
| 128    | SULAWESI SELATAN    | (72) KAB. MAJENE               | 0,0126               | 0,0008                          | 0,0134                             | 0,0046              | 0,0051              | 0,0009         | 0,0060                          | 0,0054                   | 0,0034             | 0,0006                   | 0,0030                    | 0,0124                          | 0,0364         |
| 129    | KALIMANTAN BARAT    | (113) KAB. KETAPANG            | 0,0062               | 0,0015                          | 0,0077                             | 0,0046              | 0,0051              | 0,0059         | 0,0110                          | 0,0024                   | 0,0070             | 0,0006                   | 0,0030                    | 0,0130                          | 0,0363         |
| 130    | JAWA BARAT          | (100) KAB. BOGOR               | 0,0031               | 0,0030                          | 0,0061                             | 0,0046              | 0,0083              | 0,0023         | 0,0106                          | 0,0024                   | 0,0070             | 0,0025                   | 0,0030                    | 0,0149                          | 0,0362         |
| 131    | JAWA BARAT          | (124) KAB. SUKABUMI            | 0,0062               | 0,0015                          | 0,0077                             | 0,0046              | 0,0083              | 0,0023         | 0,0106                          | 0,0024                   | 0,0070             | 0,0006                   | 0,0030                    | 0,0130                          | 0,0359         |
| 132    | PAPUA               | (137) KAB. FAKFAK              | 0,0062               | 0,0015                          | 0,0077                             | 0,0046              | 0,0083              | 0,0023         | 0,0106                          | 0,0024                   | 0,0070             | 0,0006                   | 0,0030                    | 0,0130                          | 0,0359         |



| NO.    | PROPINSI            | KABUPATEN                  | KELEMBAGAAN          |                                 |                                    |                     |                     |                |                                 |                          |                    |                          |                           |                                 | TOTAL<br>SCORE |
|--------|---------------------|----------------------------|----------------------|---------------------------------|------------------------------------|---------------------|---------------------|----------------|---------------------------------|--------------------------|--------------------|--------------------------|---------------------------|---------------------------------|----------------|
|        |                     |                            | Aparatur & Pelayanan |                                 |                                    | Peraturan<br>Daerah | Keuangan Daerah     |                |                                 | Kepastian Hukum          |                    |                          |                           |                                 |                |
|        |                     |                            | Birokrasi            | Penyalah-<br>gunaan<br>wewenang | Sub Total<br>Aparat &<br>Pelayanan |                     | Retribusi/<br>Pajak | Pemb./<br>APBD | Sub Total<br>Keuangan<br>Daerah | Konsistensi<br>Peraturan | Penegakan<br>Hukum | Pungli Luar<br>Birokrasi | Eksekutif -<br>Legislatif | Sub Total<br>Kepastian<br>Hukum |                |
|        |                     |                            |                      |                                 |                                    |                     |                     |                |                                 |                          |                    |                          |                           |                                 |                |
| 0.0483 | 0.0235              |                            | 0.0771               | 0.0316                          | 0.0141                             |                     | 0.035               | 0.0524         | 0.0194                          | 0.0167                   |                    | 0.3181                   |                           |                                 |                |
| 133    | JAWA TENGAH         | (122) KAB. MAGELANG        | 0,0062               | 0,0030                          | 0,0092                             | 0,0046              | 0,0083              | 0,0023         | 0,0106                          | 0,0024                   | 0,0034             | 0,0025                   | 0,0030                    | 0,0113                          | 0,0357         |
| 134    | DIYOGYAKARTA        | (143) KAB. BANTUL          | 0,0031               | 0,0015                          | 0,0046                             | 0,0147              | 0,0031              | 0,0009         | 0,0040                          | 0,0054                   | 0,0034             | 0,0006                   | 0,0030                    | 0,0124                          | 0,0357         |
| 135    | JAWA BARAT          | (86) KAB. KARAWANG         | 0,0062               | 0,0030                          | 0,0092                             | 0,0046              | 0,0051              | 0,0023         | 0,0074                          | 0,0024                   | 0,0070             | 0,0006                   | 0,0043                    | 0,0143                          | 0,0355         |
| 136    | SULAWESI SELATAN    | (107) KAB. TAKALAR         | 0,0031               | 0,0015                          | 0,0046                             | 0,0147              | 0,0031              | 0,0014         | 0,0045                          | 0,0024                   | 0,0034             | 0,0025                   | 0,0030                    | 0,0113                          | 0,0351         |
| 137    | KALIMANTAN SELATAN  | (125) KAB. TAPIN           | 0,0062               | 0,0015                          | 0,0077                             | 0,0046              | 0,0083              | 0,0014         | 0,0097                          | 0,0024                   | 0,0070             | 0,0006                   | 0,0030                    | 0,0130                          | 0,0350         |
| 138    | JAWA TENGAH         | (110) KAB. PEKALONGAN      | 0,0016               | 0,0015                          | 0,0031                             | 0,0147              | 0,0051              | 0,0014         | 0,0065                          | 0,0024                   | 0,0034             | 0,0012                   | 0,0030                    | 0,0100                          | 0,0343         |
| 139    | NUSA TENGGARA BARAT | (138) KAB. LOMBOK BARAT    | 0,0031               | 0,0030                          | 0,0061                             | 0,0046              | 0,0132              | 0,0014         | 0,0146                          | 0,0012                   | 0,0018             | 0,0025                   | 0,0030                    | 0,0085                          | 0,0338         |
| 140    | KALIMANTAN BARAT    | (108) KAB. PONTIANAK       | 0,0031               | 0,0015                          | 0,0046                             | 0,0046              | 0,0132              | 0,0014         | 0,0146                          | 0,0012                   | 0,0034             | 0,0006                   | 0,0043                    | 0,0095                          | 0,0333         |
| 141    | SUMATERA UTARA      | (97) KAB. TANAH KARO       | 0,0062               | 0,0030                          | 0,0092                             | 0,0046              | 0,0051              | 0,0014         | 0,0065                          | 0,0054                   | 0,0034             | 0,0012                   | 0,0030                    | 0,0130                          | 0,0333         |
| 142    | JAWA TIMUR          | (146) KAB. PAMEKASAN       | 0,0031               | 0,0008                          | 0,0039                             | 0,0147              | 0,0031              | 0,0014         | 0,0045                          | 0,0012                   | 0,0034             | 0,0025                   | 0,0030                    | 0,0101                          | 0,0332         |
| 143    | JAWA TIMUR          | (139) KAB. BONDOWOSO       | 0,0016               | 0,0008                          | 0,0024                             | 0,0147              | 0,0051              | 0,0009         | 0,0060                          | 0,0024                   | 0,0018             | 0,0025                   | 0,0030                    | 0,0097                          | 0,0328         |
| 144    | KALIMANTAN BARAT    | (74) KAB. SANGGAU          | 0,0062               | 0,0015                          | 0,0077                             | 0,0046              | 0,0051              | 0,0023         | 0,0074                          | 0,0024                   | 0,0070             | 0,0006                   | 0,0030                    | 0,0130                          | 0,0327         |
| 145    | JAWA BARAT          | (78) KAB. SUBANG           | 0,0062               | 0,0030                          | 0,0092                             | 0,0046              | 0,0031              | 0,0014         | 0,0045                          | 0,0054                   | 0,0034             | 0,0012                   | 0,0030                    | 0,0130                          | 0,0313         |
| 146    | KALIMANTAN BARAT    | (126) KAB. KAPUAS HULU     | 0,0062               | 0,0015                          | 0,0077                             | 0,0046              | 0,0020              | 0,0037         | 0,0057                          | 0,0024                   | 0,0070             | 0,0006                   | 0,0030                    | 0,0130                          | 0,0310         |
| 147    | GORONTALO           | (106) KAB. GORONTALO       | 0,0062               | 0,0015                          | 0,0077                             | 0,0046              | 0,0020              | 0,0014         | 0,0034                          | 0,0024                   | 0,0070             | 0,0006                   | 0,0030                    | 0,0130                          | 0,0287         |
| 148    | JAWA TIMUR          | (144) KAB. JEMBER          | 0,0031               | 0,0008                          | 0,0039                             | 0,0046              | 0,0031              | 0,0023         | 0,0054                          | 0,0054                   | 0,0034             | 0,0012                   | 0,0043                    | 0,0143                          | 0,0282         |
| 149    | JAWA TIMUR          | (140) KAB. MOJOKERTO       | 0,0016               | 0,0015                          | 0,0031                             | 0,0046              | 0,0083              | 0,0014         | 0,0097                          | 0,0012                   | 0,0034             | 0,0025                   | 0,0030                    | 0,0101                          | 0,0275         |
| 150    | JAWA TENGAH         | (132) KAB. SUKOHARJO       | 0,0016               | 0,0015                          | 0,0031                             | 0,0046              | 0,0083              | 0,0009         | 0,0092                          | 0,0012                   | 0,0018             | 0,0012                   | 0,0030                    | 0,0072                          | 0,0241         |
| 151    | SUMATERA UTARA      | (131) KAB. DELI SERDANG    | 0,0016               | 0,0008                          | 0,0024                             | 0,0046              | 0,0083              | 0,0014         | 0,0097                          | 0,0012                   | 0,0018             | 0,0006                   | 0,0030                    | 0,0066                          | 0,0233         |
| 152    | NUSA TENGGARA TIMUR | (148) KAB. FLORES TIMUR    | 0,0016               | 0,0008                          | 0,0024                             | 0,0046              | 0,0051              | 0,0023         | 0,0074                          | 0,0024                   | 0,0018             | 0,0012                   | 0,0030                    | 0,0084                          | 0,0228         |
| 153    | LAMPUNG             | (145) KAB. LAMPUNG SELATAN | 0,0016               | 0,0015                          | 0,0031                             | 0,0046              | 0,0051              | 0,0014         | 0,0065                          | 0,0012                   | 0,0018             | 0,0025                   | 0,0030                    | 0,0085                          | 0,0227         |
| 154    | LAMPUNG             | (142) KAB. LAMPUNG TIMUR   | 0,0016               | 0,0008                          | 0,0024                             | 0,0046              | 0,0051              | 0,0009         | 0,0060                          | 0,0012                   | 0,0018             | 0,0025                   | 0,0030                    | 0,0085                          | 0,0215         |
| 155    | JAWA TIMUR          | (134) KAB. TULUNGAGUNG     | 0,0016               | 0,0015                          | 0,0031                             | 0,0046              | 0,0051              | 0,0014         | 0,0065                          | 0,0012                   | 0,0018             | 0,0006                   | 0,0030                    | 0,0066                          | 0,0208         |
| 156    | JAWA TIMUR          | (147) KAB. PONOROGO        | 0,0016               | 0,0008                          | 0,0024                             | 0,0046              | 0,0051              | 0,0014         | 0,0065                          | 0,0012                   | 0,0018             | 0,0012                   | 0,0030                    | 0,0072                          | 0,0207         |

## Lampiran 4.6.1.2. Hasil Pembobotan (Score) Indikator, Variabel, Faktor Sosial Politik 156 Kabupaten di Indonesia

| NO. | PROPINSI            | KABUPATEN                 | SOSIAL POLITIK |                     |                  |           |                        |                    |                    |            |                          |         |                   |               |            | TOTAL SCORE |                  |
|-----|---------------------|---------------------------|----------------|---------------------|------------------|-----------|------------------------|--------------------|--------------------|------------|--------------------------|---------|-------------------|---------------|------------|-------------|------------------|
|     |                     |                           | Keamanan       |                     |                  |           | Sosial Politik         |                    |                    |            |                          | Budaya  |                   |               |            |             |                  |
|     |                     |                           | Gangguan Usaha | Gangguan Masyarakat | Kecepatan Aparat | Sub Total | Partisipasi Masyarakat | Konflik Masyarakat | Stabilitas Politik | Unjuk Rasa | Sub Total Sosial Politik | Terbuka | Non Diskriminatif | Adat-istiadat | Etos Kerja |             | Sub Total Budaya |
|     |                     |                           |                |                     |                  |           |                        |                    |                    |            |                          |         |                   |               |            |             |                  |
| 1   | JAWA TIMUR          | (2) KAB. MAGETAN          | 0,0254         | 0,0163              | 0,0335           | 0,0752    | 0,0037                 | 0,0095             | 0,0094             | 0,0005     | 0,0231                   | 0,0041  | 0,0031            | 0,0032        | 0,0067     | 0,0171      | 0,1154           |
| 2   | JAWA BARAT          | (1) KAB. PURWAKARTA       | 0,0254         | 0,0163              | 0,0335           | 0,0752    | 0,0037                 | 0,0095             | 0,0094             | 0,0005     | 0,0231                   | 0,0025  | 0,0031            | 0,0032        | 0,0067     | 0,0155      | 0,1138           |
| 3   | NUSA TENGGARA TIMUR | (26) KAB. BELU            | 0,0254         | 0,0163              | 0,0335           | 0,0752    | 0,0023                 | 0,0095             | 0,0116             | 0,0049     | 0,0283                   | 0,0012  | 0,0002            | 0,0012        | 0,0009     | 0,0035      | 0,1070           |
| 4   | SULAWESI SELATAN    | (24) KAB. BANTAENG        | 0,0254         | 0,0163              | 0,0335           | 0,0752    | 0,0023                 | 0,0024             | 0,0116             | 0,0012     | 0,0175                   | 0,0041  | 0,0031            | 0,0003        | 0,0067     | 0,0142      | 0,1069           |
| 5   | JAWA BARAT          | (5) KAB. KUNINGAN         | 0,0254         | 0,0163              | 0,0335           | 0,0752    | 0,0023                 | 0,0024             | 0,0048             | 0,0049     | 0,0144                   | 0,0012  | 0,0031            | 0,0020        | 0,0067     | 0,0130      | 0,1026           |
| 6   | NUSA TENGGARA TIMUR | (15) KAB. ENDE            | 0,0254         | 0,0163              | 0,0214           | 0,0631    | 0,0037                 | 0,0095             | 0,0094             | 0,0012     | 0,0238                   | 0,0025  | 0,0031            | 0,0032        | 0,0067     | 0,0155      | 0,1024           |
| 7   | JAWA BARAT          | (9) KAB. TASIKMALAYA      | 0,0254         | 0,0163              | 0,0335           | 0,0752    | 0,0037                 | 0,0024             | 0,0048             | 0,0005     | 0,0114                   | 0,0041  | 0,0031            | 0,0012        | 0,0067     | 0,0151      | 0,1017           |
| 8   | SULAWESI UTARA      | (16) KAB. SANGIHE         | 0,0254         | 0,0163              | 0,0335           | 0,0752    | 0,0023                 | 0,0024             | 0,0094             | 0,0049     | 0,0190                   | 0,0012  | 0,0018            | 0,0003        | 0,0019     | 0,0052      | 0,0994           |
| 9   | PAPUA               | (31) KAB. MANOKWARI       | 0,0254         | 0,0163              | 0,0335           | 0,0752    | 0,0037                 | 0,0024             | 0,0094             | 0,0005     | 0,0160                   | 0,0025  | 0,0002            | 0,0032        | 0,0005     | 0,0064      | 0,0976           |
| 10  | JAWA TENGAH         | (41) KAB. TEGAL           | 0,0153         | 0,0163              | 0,0335           | 0,0651    | 0,0023                 | 0,0095             | 0,0048             | 0,0049     | 0,0215                   | 0,0025  | 0,0018            | 0,0012        | 0,0040     | 0,0095      | 0,0961           |
| 11  | SULAWESI SELATAN    | (6) KAB. ENREKANG         | 0,0254         | 0,0163              | 0,0214           | 0,0631    | 0,0023                 | 0,0095             | 0,0094             | 0,0025     | 0,0237                   | 0,0012  | 0,0018            | 0,0020        | 0,0040     | 0,0090      | 0,0958           |
| 12  | BALI                | (4) KAB. JEMBRANA         | 0,0254         | 0,0163              | 0,0214           | 0,0631    | 0,0023                 | 0,0007             | 0,0116             | 0,0003     | 0,0149                   | 0,0041  | 0,0031            | 0,0032        | 0,0040     | 0,0144      | 0,0924           |
| 13  | SULAWESI SELATAN    | (8) KAB. JENEPONTO        | 0,0153         | 0,0080              | 0,0335           | 0,0568    | 0,0037                 | 0,0095             | 0,0048             | 0,0012     | 0,0192                   | 0,0025  | 0,0031            | 0,0032        | 0,0067     | 0,0155      | 0,0915           |
| 14  | KALIMANTAN TIMUR    | (17) KAB. NUNUKAN         | 0,0153         | 0,0080              | 0,0335           | 0,0568    | 0,0030                 | 0,0048             | 0,0094             | 0,0005     | 0,0177                   | 0,0041  | 0,0031            | 0,0020        | 0,0067     | 0,0159      | 0,0904           |
| 15  | SULAWESI SELATAN    | (14) KAB. SINJAI          | 0,0153         | 0,0163              | 0,0335           | 0,0651    | 0,0023                 | 0,0011             | 0,0048             | 0,0025     | 0,0107                   | 0,0025  | 0,0031            | 0,0020        | 0,0067     | 0,0143      | 0,0901           |
| 16  | SULAWESI SELATAN    | (19) KAB. GOWA            | 0,0254         | 0,0163              | 0,0214           | 0,0631    | 0,0023                 | 0,0011             | 0,0094             | 0,0012     | 0,0140                   | 0,0012  | 0,0031            | 0,0005        | 0,0067     | 0,0115      | 0,0886           |
| 17  | SULAWESI UTARA      | (20) KAB. MINAHASA        | 0,0153         | 0,0036              | 0,0335           | 0,0524    | 0,0030                 | 0,0048             | 0,0116             | 0,0012     | 0,0206                   | 0,0025  | 0,0031            | 0,0032        | 0,0067     | 0,0155      | 0,0885           |
| 18  | KALIMANTAN TENGAH   | (29) KAB. KAPUAS          | 0,0254         | 0,0036              | 0,0335           | 0,0625    | 0,0037                 | 0,0024             | 0,0116             | 0,0005     | 0,0182                   | 0,0012  | 0,0004            | 0,0032        | 0,0019     | 0,0067      | 0,0874           |
| 19  | KALIMANTAN TIMUR    | (3) KAB. BULUNGAN         | 0,0254         | 0,0163              | 0,0214           | 0,0631    | 0,0023                 | 0,0024             | 0,0116             | 0,0012     | 0,0175                   | 0,0025  | 0,0009            | 0,0012        | 0,0019     | 0,0065      | 0,0871           |
| 20  | SULAWESI TENGAH     | (10) KAB. BANGGAI         | 0,0254         | 0,0163              | 0,0102           | 0,0519    | 0,0037                 | 0,0095             | 0,0094             | 0,0005     | 0,0231                   | 0,0003  | 0,0002            | 0,0032        | 0,0067     | 0,0104      | 0,0854           |
| 21  | SULAWESI SELATAN    | (25) KAB. TANA TORAJA     | 0,0062         | 0,0163              | 0,0335           | 0,0560    | 0,0023                 | 0,0048             | 0,0116             | 0,0049     | 0,0236                   | 0,0012  | 0,0031            | 0,0005        | 0,0009     | 0,0057      | 0,0853           |
| 22  | JAWA BARAT          | (78) KAB. SUBANG          | 0,0254         | 0,0163              | 0,0214           | 0,0631    | 0,0023                 | 0,0024             | 0,0094             | 0,0012     | 0,0153                   | 0,0025  | 0,0018            | 0,0012        | 0,0005     | 0,0060      | 0,0844           |
| 23  | BALI                | (13) KAB. BANGLI          | 0,0254         | 0,0163              | 0,0214           | 0,0631    | 0,0023                 | 0,0011             | 0,0020             | 0,0003     | 0,0057                   | 0,0025  | 0,0031            | 0,0032        | 0,0067     | 0,0155      | 0,0843           |
| 24  | SULAWESI SELATAN    | (28) KAB. LUWU UTARA      | 0,0254         | 0,0080              | 0,0102           | 0,0436    | 0,0023                 | 0,0024             | 0,0116             | 0,0049     | 0,0212                   | 0,0041  | 0,0031            | 0,0032        | 0,0067     | 0,0171      | 0,0819           |
| 25  | SUMATERA BARAT      | (35) KAB. PESISIR SELATAN | 0,0153         | 0,0163              | 0,0335           | 0,0651    | 0,0023                 | 0,0011             | 0,0048             | 0,0005     | 0,0087                   | 0,0041  | 0,0009            | 0,0012        | 0,0019     | 0,0081      | 0,0819           |
| 26  | SUMATERA UTARA      | (54) KAB. TAPANULI UTARA  | 0,0254         | 0,0163              | 0,0214           | 0,0631    | 0,0023                 | 0,0007             | 0,0048             | 0,0005     | 0,0083                   | 0,0041  | 0,0031            | 0,0012        | 0,0019     | 0,0103      | 0,0817           |

| NO.    | PROPINSI            | KABUPATEN                        | SOSIAL POLITIK    |                        |                     |           |                           |                       |                       |            |                                |         |                      |                   |            | TOTAL<br>SCORE |           |
|--------|---------------------|----------------------------------|-------------------|------------------------|---------------------|-----------|---------------------------|-----------------------|-----------------------|------------|--------------------------------|---------|----------------------|-------------------|------------|----------------|-----------|
|        |                     |                                  | Keamanan          |                        |                     |           | Sosial Politik            |                       |                       |            |                                | Budaya  |                      |                   |            |                |           |
|        |                     |                                  | Gangguan<br>Usaha | Gangguan<br>Masyarakat | Kecepatan<br>Aparat | Sub Total | Partisipasi<br>Masyarakat | Konflik<br>Masyarakat | Stabilitas<br>Politik | Unjuk Rasa | Sub Total<br>Sosial<br>Politik | Terbuka | Non<br>Diskriminatif | Adat-<br>istiadat | Etos Kerja |                | Sub Total |
|        |                     |                                  |                   |                        |                     |           |                           |                       |                       |            |                                |         |                      |                   |            |                |           |
| 0.0523 | 0.0311              | 0.0724                           | Keamanan          | 0.012                  | 0.0184              | 0.0289    | 0.0095                    | Politik               | 0.0086                | 0.0064     | 0.0071                         | 0.0141  | Budaya               | 0.2608            |            |                |           |
| 27     | R I A U             | (50) KAB. KAMPAR                 | 0,0153            | 0,0036                 | 0,0335              | 0,0524    | 0,0023                    | 0,0011                | 0,0094                | 0,0005     | 0,0133                         | 0,0025  | 0,0031               | 0,0032            | 0,0067     | 0,0155         | 0,0812    |
| 28     | NUSA TENGGARA TIMUR | (43) KAB. TIMOR TENGAH SELATAN   | 0,0062            | 0,0080                 | 0,0335              | 0,0477    | 0,0023                    | 0,0095                | 0,0116                | 0,0049     | 0,0283                         | 0,0012  | 0,0004               | 0,0012            | 0,0005     | 0,0033         | 0,0793    |
| 29     | JAWA BARAT          | (57) KAB. CIAMIS                 | 0,0254            | 0,0163                 | 0,0102              | 0,0519    | 0,0037                    | 0,0024                | 0,0048                | 0,0049     | 0,0158                         | 0,0041  | 0,0018               | 0,0020            | 0,0009     | 0,0088         | 0,0765    |
| 30     | JAWA BARAT          | (12) KAB. INDRAMAYU              | 0,0062            | 0,0163                 | 0,0335              | 0,0560    | 0,0023                    | 0,0024                | 0,0094                | 0,0012     | 0,0153                         | 0,0012  | 0,0009               | 0,0012            | 0,0019     | 0,0052         | 0,0765    |
| 31     | KALIMANTAN TENGAH   | (7) KAB. BARITO UTARA            | 0,0254            | 0,0163                 | 0,0102              | 0,0519    | 0,0037                    | 0,0024                | 0,0094                | 0,0005     | 0,0160                         | 0,0003  | 0,0002               | 0,0003            | 0,0067     | 0,0075         | 0,0754    |
| 32     | SUMATERA BARAT      | (11) KAB. SAWAHLUNTO SIJUNJUNG   | 0,0254            | 0,0080                 | 0,0102              | 0,0436    | 0,0023                    | 0,0095                | 0,0020                | 0,0005     | 0,0143                         | 0,0041  | 0,0031               | 0,0032            | 0,0067     | 0,0171         | 0,0750    |
| 33     | SULAWESI SELATAN    | (69) KAB. SELAYAR                | 0,0153            | 0,0163                 | 0,0102              | 0,0418    | 0,0023                    | 0,0024                | 0,0116                | 0,0049     | 0,0212                         | 0,0025  | 0,0031               | 0,0032            | 0,0019     | 0,0107         | 0,0737    |
| 34     | SULAWESI SELATAN    | (72) KAB. MAJENE                 | 0,0254            | 0,0080                 | 0,0102              | 0,0436    | 0,0023                    | 0,0011                | 0,0094                | 0,0005     | 0,0133                         | 0,0041  | 0,0031               | 0,0020            | 0,0067     | 0,0159         | 0,0728    |
| 35     | SULAWESI TENGGARA   | (33) KAB. KOLAKA                 | 0,0254            | 0,0163                 | 0,0102              | 0,0519    | 0,0037                    | 0,0011                | 0,0048                | 0,0049     | 0,0145                         | 0,0006  | 0,0004               | 0,0012            | 0,0019     | 0,0041         | 0,0705    |
| 36     | J A M B I           | (39) KAB. BATANGHARI             | 0,0062            | 0,0036                 | 0,0335              | 0,0433    | 0,0030                    | 0,0048                | 0,0116                | 0,0025     | 0,0219                         | 0,0012  | 0,0009               | 0,0012            | 0,0009     | 0,0042         | 0,0694    |
| 37     | JAWA BARAT          | (18) KAB. CIANJUR                | 0,0020            | 0,0080                 | 0,0214              | 0,0314    | 0,0037                    | 0,0095                | 0,0094                | 0,0012     | 0,0238                         | 0,0012  | 0,0031               | 0,0032            | 0,0067     | 0,0142         | 0,0694    |
| 38     | SUMATERA SELATAN    | (40) KAB. LAHAT                  | 0,0062            | 0,0021                 | 0,0335              | 0,0418    | 0,0023                    | 0,0011                | 0,0094                | 0,0025     | 0,0153                         | 0,0041  | 0,0009               | 0,0032            | 0,0040     | 0,0122         | 0,0693    |
| 39     | LAMPUNG             | (59) KAB. LAMPUNG BARAT          | 0,0254            | 0,0163                 | 0,0048              | 0,0465    | 0,0023                    | 0,0007                | 0,0094                | 0,0049     | 0,0173                         | 0,0012  | 0,0009               | 0,0012            | 0,0019     | 0,0052         | 0,0690    |
| 40     | JAWA TIMUR          | (83) KAB. KEDIRI                 | 0,0034            | 0,0021                 | 0,0214              | 0,0269    | 0,0023                    | 0,0095                | 0,0094                | 0,0025     | 0,0237                         | 0,0041  | 0,0031               | 0,0032            | 0,0067     | 0,0171         | 0,0677    |
| 41     | JAWA BARAT          | (71) KAB. GARUT                  | 0,0062            | 0,0080                 | 0,0214              | 0,0356    | 0,0023                    | 0,0024                | 0,0094                | 0,0049     | 0,0190                         | 0,0025  | 0,0031               | 0,0032            | 0,0040     | 0,0128         | 0,0674    |
| 42     | BANGKA BELITUNG     | (27) KAB. BELITUNG               | 0,0254            | 0,0163                 | 0,0102              | 0,0519    | 0,0023                    | 0,0011                | 0,0048                | 0,0012     | 0,0094                         | 0,0012  | 0,0009               | 0,0012            | 0,0019     | 0,0052         | 0,0665    |
| 43     | PAPUA               | (46) KAB. SORONG                 | 0,0254            | 0,0036                 | 0,0102              | 0,0392    | 0,0030                    | 0,0095                | 0,0094                | 0,0012     | 0,0231                         | 0,0012  | 0,0004               | 0,0012            | 0,0009     | 0,0037         | 0,0660    |
| 44     | BALI                | (48) KAB. KARANG ASEM            | 0,0153            | 0,0080                 | 0,0102              | 0,0335    | 0,0023                    | 0,0024                | 0,0116                | 0,0012     | 0,0175                         | 0,0041  | 0,0009               | 0,0012            | 0,0067     | 0,0129         | 0,0639    |
| 45     | SULAWESI SELATAN    | (21) KAB. PANGKAJENE & KEPULAUAN | 0,0153            | 0,0080                 | 0,0214              | 0,0447    | 0,0037                    | 0,0011                | 0,0020                | 0,0003     | 0,0071                         | 0,0012  | 0,0018               | 0,0012            | 0,0067     | 0,0109         | 0,0627    |
| 46     | GORONTALO           | (106) KAB. GORONTALO             | 0,0254            | 0,0012                 | 0,0102              | 0,0368    | 0,0037                    | 0,0095                | 0,0094                | 0,0005     | 0,0231                         | 0,0003  | 0,0002               | 0,0012            | 0,0009     | 0,0026         | 0,0625    |
| 47     | J A M B I           | (79) KAB. KERINCI                | 0,0062            | 0,0080                 | 0,0102              | 0,0244    | 0,0023                    | 0,0095                | 0,0116                | 0,0025     | 0,0259                         | 0,0012  | 0,0009               | 0,0012            | 0,0067     | 0,0100         | 0,0603    |
| 48     | BALI                | (30) KAB. GIANYAR                | 0,0153            | 0,0080                 | 0,0214              | 0,0447    | 0,0037                    | 0,0011                | 0,0048                | 0,0003     | 0,0099                         | 0,0012  | 0,0009               | 0,0012            | 0,0019     | 0,0052         | 0,0598    |
| 49     | RIAU                | (42) KAB. ROKAN HULU             | 0,0153            | 0,0036                 | 0,0102              | 0,0291    | 0,0037                    | 0,0048                | 0,0116                | 0,0049     | 0,0250                         | 0,0025  | 0,0009               | 0,0003            | 0,0019     | 0,0056         | 0,0597    |
| 50     | KALIMANTAN SELATAN  | (23) KAB. TABALONG               | 0,0062            | 0,0036                 | 0,0214              | 0,0312    | 0,0023                    | 0,0048                | 0,0116                | 0,0025     | 0,0212                         | 0,0012  | 0,0009               | 0,0020            | 0,0019     | 0,0060         | 0,0584    |
| 51     | LAMPUNG             | (64) KAB. WAY KANAN              | 0,0034            | 0,0012                 | 0,0335              | 0,0381    | 0,0023                    | 0,0011                | 0,0048                | 0,0003     | 0,0085                         | 0,0025  | 0,0009               | 0,0012            | 0,0067     | 0,0113         | 0,0579    |
| 52     | KALIMANTAN BARAT    | (85) KAB. SAMBAS                 | 0,0062            | 0,0036                 | 0,0214              | 0,0312    | 0,0023                    | 0,0048                | 0,0116                | 0,0005     | 0,0192                         | 0,0012  | 0,0009               | 0,0032            | 0,0019     | 0,0072         | 0,0576    |
| 53     | BALI                | (21) KAB. TABANAN                | 0,0062            | 0,0036                 | 0,0214              | 0,0312    | 0,0023                    | 0,0024                | 0,0116                | 0,0012     | 0,0175                         | 0,0012  | 0,0009               | 0,0020            | 0,0040     | 0,0081         | 0,0568    |

| NO.    | PROPINSI            | KABUPATEN                      | SOSIAL POLITIK    |                        |                     |           |                           |                       |                       |            |                                |         |                      |                   |            | TOTAL<br>SCORE |           |
|--------|---------------------|--------------------------------|-------------------|------------------------|---------------------|-----------|---------------------------|-----------------------|-----------------------|------------|--------------------------------|---------|----------------------|-------------------|------------|----------------|-----------|
|        |                     |                                | Keamanan          |                        |                     |           | Sosial Politik            |                       |                       |            |                                | Budaya  |                      |                   |            |                |           |
|        |                     |                                | Gangguan<br>Usaha | Gangguan<br>Masyarakat | Kecepatan<br>Aparat | Sub Total | Partisipasi<br>Masyarakat | Konflik<br>Masyarakat | Stabilitas<br>Politik | Unjuk Rasa | Sub Total<br>Sosial<br>Politik | Terbuka | Non<br>Diskriminatif | Adat-<br>istiadat | Etos Kerja |                | Sub Total |
|        |                     |                                |                   |                        |                     |           |                           |                       |                       |            |                                |         |                      |                   |            |                |           |
| 0.0523 | 0.0311              | 0.0724                         | Keamanan          | 0.012                  | 0.0184              | 0.0289    | 0.0095                    | Politik               | 0.0086                | 0.0064     | 0.0071                         | 0.0141  | Budaya               | 0.2608            |            |                |           |
| 54     | SUMATERA BARAT      | (62) KAB. PASAMAN              | 0,0153            | 0,0036                 | 0,0048              | 0,0237    | 0,0023                    | 0,0048                | 0,0116                | 0,0003     | 0,0190                         | 0,0025  | 0,0009               | 0,0020            | 0,0067     | 0,0121         | 0,0548    |
| 55     | JAWA TENGAH         | (75) KAB. BOYOLALI             | 0,0254            | 0,0036                 | 0,0102              | 0,0392    | 0,0037                    | 0,0007                | 0,0048                | 0,0005     | 0,0097                         | 0,0025  | 0,0004               | 0,0003            | 0,0019     | 0,0051         | 0,0540    |
| 56     | SULAWESI SELATAN    | (80) KAB. BONE                 | 0,0062            | 0,0036                 | 0,0102              | 0,0200    | 0,0023                    | 0,0095                | 0,0116                | 0,0012     | 0,0246                         | 0,0025  | 0,0009               | 0,0012            | 0,0040     | 0,0086         | 0,0532    |
| 57     | RIAU                | (22) KAB. PELALAWAN            | 0,0062            | 0,0036                 | 0,0102              | 0,0200    | 0,0023                    | 0,0048                | 0,0094                | 0,0005     | 0,0170                         | 0,0025  | 0,0031               | 0,0032            | 0,0067     | 0,0155         | 0,0525    |
| 58     | KALIMANTAN SELATAN  | (37) KAB. HULU SUNGAI UTARA    | 0,0062            | 0,0036                 | 0,0102              | 0,0200    | 0,0023                    | 0,0024                | 0,0116                | 0,0049     | 0,0212                         | 0,0025  | 0,0009               | 0,0032            | 0,0040     | 0,0106         | 0,0518    |
| 59     | BANTEN              | (47) KAB. LEBAK                | 0,0153            | 0,0080                 | 0,0102              | 0,0335    | 0,0023                    | 0,0024                | 0,0048                | 0,0025     | 0,0120                         | 0,0012  | 0,0009               | 0,0020            | 0,0019     | 0,0060         | 0,0515    |
| 60     | KALIMANTAN TIMUR    | (66) KAB. KUTAI TIMUR          | 0,0062            | 0,0021                 | 0,0214              | 0,0297    | 0,0023                    | 0,0024                | 0,0116                | 0,0012     | 0,0175                         | 0,0012  | 0,0004               | 0,0005            | 0,0019     | 0,0040         | 0,0512    |
| 61     | SUMATERA UTARA      | (56) KAB. DAIRI                | 0,0034            | 0,0012                 | 0,0335              | 0,0381    | 0,0023                    | 0,0007                | 0,0048                | 0,0005     | 0,0083                         | 0,0012  | 0,0004               | 0,0012            | 0,0019     | 0,0047         | 0,0511    |
| 62     | NUSA TENGGARA TIMUR | (128) KAB. NGADA               | 0,0153            | 0,0036                 | 0,0048              | 0,0237    | 0,0023                    | 0,0048                | 0,0116                | 0,0049     | 0,0236                         | 0,0012  | 0,0009               | 0,0005            | 0,0009     | 0,0035         | 0,0508    |
| 63     | BALI                | (52) KAB. BULELENG             | 0,0062            | 0,0036                 | 0,0102              | 0,0200    | 0,0023                    | 0,0095                | 0,0116                | 0,0025     | 0,0259                         | 0,0012  | 0,0002               | 0,0012            | 0,0019     | 0,0045         | 0,0504    |
| 64     | NUSA TENGGARA TIMUR | (120) KAB. SUMBA BARAT         | 0,0020            | 0,0036                 | 0,0214              | 0,0270    | 0,0023                    | 0,0024                | 0,0094                | 0,0049     | 0,0190                         | 0,0006  | 0,0004               | 0,0012            | 0,0019     | 0,0041         | 0,0501    |
| 65     | R I A U             | (70) KAB. BENGKALIS            | 0,0062            | 0,0036                 | 0,0102              | 0,0200    | 0,0037                    | 0,0095                | 0,0116                | 0,0012     | 0,0260                         | 0,0006  | 0,0002               | 0,0005            | 0,0009     | 0,0022         | 0,0482    |
| 66     | R I A U             | (101) KAB. INDRAGIRI HILIR     | 0,0062            | 0,0012                 | 0,0048              | 0,0122    | 0,0023                    | 0,0048                | 0,0116                | 0,0049     | 0,0236                         | 0,0041  | 0,0031               | 0,0032            | 0,0019     | 0,0123         | 0,0481    |
| 67     | RIAU                | (81) KAB. KUANTAN SENGGIGI     | 0,0034            | 0,0021                 | 0,0214              | 0,0269    | 0,0023                    | 0,0011                | 0,0116                | 0,0012     | 0,0162                         | 0,0012  | 0,0009               | 0,0012            | 0,0009     | 0,0042         | 0,0473    |
| 68     | BALI                | (34) KAB. BADUNG               | 0,0062            | 0,0036                 | 0,0214              | 0,0312    | 0,0023                    | 0,0011                | 0,0048                | 0,0003     | 0,0085                         | 0,0012  | 0,0009               | 0,0012            | 0,0040     | 0,0073         | 0,0470    |
| 69     | NUSA TENGGARA BARAT | (93) KAB. LOMBOK TIMUR         | 0,0062            | 0,0036                 | 0,0102              | 0,0200    | 0,0030                    | 0,0024                | 0,0116                | 0,0049     | 0,0219                         | 0,0012  | 0,0018               | 0,0012            | 0,0009     | 0,0051         | 0,0470    |
| 70     | JAWA TENGAH         | (96) KAB. KENDAL               | 0,0034            | 0,0036                 | 0,0102              | 0,0172    | 0,0037                    | 0,0048                | 0,0116                | 0,0049     | 0,0250                         | 0,0006  | 0,0009               | 0,0012            | 0,0019     | 0,0046         | 0,0468    |
| 71     | JAMBI               | (20) KAB. TANJUNG JABUNG TIMUR | 0,0034            | 0,0021                 | 0,0214              | 0,0269    | 0,0023                    | 0,0024                | 0,0094                | 0,0005     | 0,0146                         | 0,0012  | 0,0009               | 0,0012            | 0,0019     | 0,0052         | 0,0467    |
| 72     | SUMATERA SELATAN    | (88) KAB. MUSI RAWAS           | 0,0062            | 0,0036                 | 0,0102              | 0,0200    | 0,0037                    | 0,0048                | 0,0048                | 0,0049     | 0,0182                         | 0,0041  | 0,0031               | 0,0003            | 0,0009     | 0,0084         | 0,0466    |
| 73     | LAMPUNG             | (10) KAB. LAMPUNG UTARA        | 0,0062            | 0,0036                 | 0,0214              | 0,0312    | 0,0023                    | 0,0024                | 0,0048                | 0,0005     | 0,0100                         | 0,0025  | 0,0002               | 0,0005            | 0,0019     | 0,0051         | 0,0463    |
| 74     | JAWA TIMUR          | (134) KAB. TULUNGAGUNG         | 0,0020            | 0,0036                 | 0,0102              | 0,0158    | 0,0037                    | 0,0095                | 0,0094                | 0,0005     | 0,0231                         | 0,0012  | 0,0009               | 0,0012            | 0,0040     | 0,0073         | 0,0462    |
| 75     | JAWA TIMUR          | (73) KAB. BLITAR               | 0,0062            | 0,0036                 | 0,0102              | 0,0200    | 0,0037                    | 0,0024                | 0,0094                | 0,0005     | 0,0160                         | 0,0012  | 0,0004               | 0,0012            | 0,0067     | 0,0095         | 0,0455    |
| 76     | JAMBI               | (68) KAB. TEBO                 | 0,0062            | 0,0036                 | 0,0102              | 0,0200    | 0,0037                    | 0,0011                | 0,0094                | 0,0005     | 0,0147                         | 0,0025  | 0,0018               | 0,0020            | 0,0040     | 0,0103         | 0,0450    |
| 77     | JAWA TENGAH         | (114) KAB. KEBUMEN             | 0,0062            | 0,0036                 | 0,0102              | 0,0200    | 0,0023                    | 0,0048                | 0,0116                | 0,0012     | 0,0199                         | 0,0006  | 0,0009               | 0,0012            | 0,0019     | 0,0046         | 0,0445    |
| 78     | SULAWESI SELATAN    | (60) KAB. PINRANG              | 0,0034            | 0,0036                 | 0,0102              | 0,0172    | 0,0030                    | 0,0095                | 0,0048                | 0,0012     | 0,0185                         | 0,0025  | 0,0031               | 0,0012            | 0,0019     | 0,0087         | 0,0444    |
| 79     | SULAWESI SELATAN    | (36) KAB. MAROS                | 0,0062            | 0,0036                 | 0,0214              | 0,0312    | 0,0023                    | 0,0011                | 0,0048                | 0,0005     | 0,0087                         | 0,0012  | 0,0009               | 0,0003            | 0,0019     | 0,0043         | 0,0442    |
| 80     | JAWA TIMUR          | (98) KAB. JOMBANG              | 0,0062            | 0,0036                 | 0,0102              | 0,0200    | 0,0023                    | 0,0011                | 0,0116                | 0,0025     | 0,0175                         | 0,0012  | 0,0009               | 0,0020            | 0,0019     | 0,0060         | 0,0435    |

| NO.    | PROPINSI            | KABUPATEN                      | SOSIAL POLITIK    |                        |                     |           |                           |                       |                       |            |                                |         |                      |                   |            | TOTAL<br>SCORE |           |
|--------|---------------------|--------------------------------|-------------------|------------------------|---------------------|-----------|---------------------------|-----------------------|-----------------------|------------|--------------------------------|---------|----------------------|-------------------|------------|----------------|-----------|
|        |                     |                                | Keamanan          |                        |                     |           | Sosial Politik            |                       |                       |            |                                | Budaya  |                      |                   |            |                |           |
|        |                     |                                | Gangguan<br>Usaha | Gangguan<br>Masyarakat | Kecepatan<br>Aparat | Sub Total | Partisipasi<br>Masyarakat | Konflik<br>Masyarakat | Stabilitas<br>Politik | Unjuk Rasa | Sub Total<br>Sosial<br>Politik | Terbuka | Non<br>Diskriminatif | Adat-<br>istiadat | Etos Kerja |                | Sub Total |
|        |                     |                                |                   |                        |                     |           |                           |                       |                       |            |                                |         |                      |                   |            |                |           |
| 0.0523 | 0.0311              | 0.0724                         | Keamanan          | 0.012                  | 0.0184              | 0.0289    | 0.0095                    | Politik               | 0.0086                | 0.0064     | 0.0071                         | 0.0141  | Budaya               | 0.2608            |            |                |           |
| 81     | KALIMANTAN TIMUR    | (53) KAB. PASIR                | 0,0062            | 0,0036                 | 0,0102              | 0,0200    | 0,0023                    | 0,0024                | 0,0116                | 0,0025     | 0,0188                         | 0,0012  | 0,0009               | 0,0012            | 0,0009     | 0,0042         | 0,0430    |
| 82     | JAWA TIMUR          | (139) KAB. BONDOWOSO           | 0,0062            | 0,0012                 | 0,0025              | 0,0099    | 0,0037                    | 0,0095                | 0,0116                | 0,0049     | 0,0297                         | 0,0012  | 0,0009               | 0,0003            | 0,0005     | 0,0029         | 0,0425    |
| 83     | JAWA BARAT          | (86) KAB. KARAWANG             | 0,0020            | 0,0012                 | 0,0102              | 0,0134    | 0,0037                    | 0,0095                | 0,0116                | 0,0012     | 0,0260                         | 0,0003  | 0,0002               | 0,0012            | 0,0009     | 0,0026         | 0,0420    |
| 84     | SULAWESI SELATAN    | (101) KAB. LUWU                | 0,0062            | 0,0021                 | 0,0025              | 0,0108    | 0,0023                    | 0,0095                | 0,0116                | 0,0012     | 0,0246                         | 0,0012  | 0,0002               | 0,0012            | 0,0040     | 0,0066         | 0,0420    |
| 85     | JAWA TENGAH         | (132) KAB. SUKOHARJO           | 0,0062            | 0,0036                 | 0,0102              | 0,0200    | 0,0023                    | 0,0024                | 0,0116                | 0,0012     | 0,0175                         | 0,0006  | 0,0009               | 0,0005            | 0,0019     | 0,0039         | 0,0414    |
| 86     | SUMATERA UTARA      | (44) KAB. ASAHAN               | 0,0020            | 0,0012                 | 0,0102              | 0,0134    | 0,0037                    | 0,0095                | 0,0094                | 0,0005     | 0,0231                         | 0,0025  | 0,0002               | 0,0012            | 0,0009     | 0,0048         | 0,0413    |
| 87     | SUMATERA UTARA      | (91) KAB. LANGKAT              | 0,0020            | 0,0012                 | 0,0102              | 0,0134    | 0,0037                    | 0,0095                | 0,0094                | 0,0005     | 0,0231                         | 0,0025  | 0,0002               | 0,0012            | 0,0009     | 0,0048         | 0,0413    |
| 88     | SUMATERA UTARA      | (104) KAB. SIMALUNGUN          | 0,0020            | 0,0012                 | 0,0102              | 0,0134    | 0,0037                    | 0,0095                | 0,0094                | 0,0005     | 0,0231                         | 0,0025  | 0,0002               | 0,0012            | 0,0009     | 0,0048         | 0,0413    |
| 89     | JAWA TENGAH         | (102) KAB. KARANG ANYAR        | 0,0034            | 0,0012                 | 0,0102              | 0,0148    | 0,0023                    | 0,0007                | 0,0116                | 0,0003     | 0,0149                         | 0,0012  | 0,0031               | 0,0032            | 0,0040     | 0,0115         | 0,0412    |
| 90     | JAWA TENGAH         | (122) KAB. MAGELANG            | 0,0062            | 0,0036                 | 0,0102              | 0,0200    | 0,0023                    | 0,0024                | 0,0094                | 0,0012     | 0,0153                         | 0,0012  | 0,0009               | 0,0012            | 0,0019     | 0,0052         | 0,0405    |
| 91     | SULAWESI TENGAH     | (45) KAB. TOLI TOLI            | 0,0062            | 0,0036                 | 0,0025              | 0,0123    | 0,0037                    | 0,0095                | 0,0048                | 0,0049     | 0,0229                         | 0,0012  | 0,0009               | 0,0012            | 0,0019     | 0,0052         | 0,0404    |
| 92     | SULAWESI SELATAN    | (107) KAB. TAKALAR             | 0,0062            | 0,0036                 | 0,0102              | 0,0200    | 0,0030                    | 0,0007                | 0,0116                | 0,0012     | 0,0165                         | 0,0012  | 0,0009               | 0,0012            | 0,0005     | 0,0038         | 0,0403    |
| 93     | JAWA BARAT          | (100) KAB. SUMEDANG            | 0,0062            | 0,0080                 | 0,0102              | 0,0244    | 0,0023                    | 0,0024                | 0,0048                | 0,0049     | 0,0144                         | 0,0003  | 0,0002               | 0,0003            | 0,0005     | 0,0013         | 0,0401    |
| 94     | J A M B I           | (90) KAB. BUNGO                | 0,0062            | 0,0036                 | 0,0102              | 0,0200    | 0,0023                    | 0,0024                | 0,0048                | 0,0049     | 0,0144                         | 0,0012  | 0,0009               | 0,0012            | 0,0019     | 0,0052         | 0,0396    |
| 95     | JAWA TENGAH         | (92) KAB. KLATEN               | 0,0020            | 0,0012                 | 0,0048              | 0,0080    | 0,0023                    | 0,0011                | 0,0116                | 0,0005     | 0,0155                         | 0,0041  | 0,0031               | 0,0020            | 0,0067     | 0,0159         | 0,0394    |
| 96     | NUSA TENGGARA TIMUR | (115) KAB. MANGGARAI           | 0,0034            | 0,0021                 | 0,0048              | 0,0103    | 0,0023                    | 0,0095                | 0,0116                | 0,0025     | 0,0259                         | 0,0006  | 0,0009               | 0,0012            | 0,0005     | 0,0032         | 0,0394    |
| 97     | JAWA BARAT          | (124) KAB. SUKABUMI            | 0,0020            | 0,0012                 | 0,0102              | 0,0134    | 0,0037                    | 0,0095                | 0,0094                | 0,0005     | 0,0231                         | 0,0003  | 0,0002               | 0,0012            | 0,0009     | 0,0026         | 0,0391    |
| 98     | KALIMANTAN BARAT    | (126) KAB. KAPUAS HULU         | 0,0020            | 0,0012                 | 0,0102              | 0,0134    | 0,0037                    | 0,0095                | 0,0094                | 0,0005     | 0,0231                         | 0,0003  | 0,0002               | 0,0012            | 0,0009     | 0,0026         | 0,0391    |
| 99     | KALIMANTAN BARAT    | (113) KAB. KETAPANG            | 0,0020            | 0,0012                 | 0,0102              | 0,0134    | 0,0037                    | 0,0095                | 0,0094                | 0,0005     | 0,0231                         | 0,0003  | 0,0002               | 0,0012            | 0,0009     | 0,0026         | 0,0391    |
| 100    | KALIMANTAN BARAT    | (74) KAB. SANGGAU              | 0,0020            | 0,0012                 | 0,0102              | 0,0134    | 0,0037                    | 0,0095                | 0,0094                | 0,0005     | 0,0231                         | 0,0003  | 0,0002               | 0,0012            | 0,0009     | 0,0026         | 0,0391    |
| 101    | KALIMANTAN TENGAH   | (95) KAB. BARITO SELATAN       | 0,0020            | 0,0012                 | 0,0102              | 0,0134    | 0,0037                    | 0,0095                | 0,0094                | 0,0005     | 0,0231                         | 0,0003  | 0,0002               | 0,0012            | 0,0009     | 0,0026         | 0,0391    |
| 102    | KALIMANTAN SELATAN  | (109) KAB. HULU SUNGAI SELATAN | 0,0020            | 0,0012                 | 0,0102              | 0,0134    | 0,0037                    | 0,0095                | 0,0094                | 0,0005     | 0,0231                         | 0,0003  | 0,0002               | 0,0012            | 0,0009     | 0,0026         | 0,0391    |
| 103    | KALIMANTAN SELATAN  | (112) KAB. HULU SUNGAI TENGAH  | 0,0020            | 0,0012                 | 0,0102              | 0,0134    | 0,0037                    | 0,0095                | 0,0094                | 0,0005     | 0,0231                         | 0,0003  | 0,0002               | 0,0012            | 0,0009     | 0,0026         | 0,0391    |
| 104    | KALIMANTAN SELATAN  | (125) KAB. TAPIN               | 0,0020            | 0,0012                 | 0,0102              | 0,0134    | 0,0037                    | 0,0095                | 0,0094                | 0,0005     | 0,0231                         | 0,0003  | 0,0002               | 0,0012            | 0,0009     | 0,0026         | 0,0391    |
| 105    | SULAWESI TENGAH     | (84) KAB. DONGGALA             | 0,0020            | 0,0012                 | 0,0102              | 0,0134    | 0,0037                    | 0,0095                | 0,0094                | 0,0005     | 0,0231                         | 0,0003  | 0,0002               | 0,0012            | 0,0009     | 0,0026         | 0,0391    |
| 106    | SULAWESI TENGGARA   | (111) KAB. BUTON               | 0,0020            | 0,0012                 | 0,0102              | 0,0134    | 0,0037                    | 0,0095                | 0,0094                | 0,0005     | 0,0231                         | 0,0003  | 0,0002               | 0,0012            | 0,0009     | 0,0026         | 0,0391    |
| 107    | PAPUA               | (137) KAB. FAKFAK              | 0,0020            | 0,0012                 | 0,0102              | 0,0134    | 0,0037                    | 0,0095                | 0,0094                | 0,0005     | 0,0231                         | 0,0003  | 0,0002               | 0,0012            | 0,0009     | 0,0026         | 0,0391    |

| NO.    | PROPINSI            | KABUPATEN                     | SOSIAL POLITIK    |                        |                     |           |                           |                       |                       |            |                                |         |                      |                   |            |           | TOTAL<br>SCORE |
|--------|---------------------|-------------------------------|-------------------|------------------------|---------------------|-----------|---------------------------|-----------------------|-----------------------|------------|--------------------------------|---------|----------------------|-------------------|------------|-----------|----------------|
|        |                     |                               | Keamanan          |                        |                     |           | Sosial Politik            |                       |                       |            |                                | Budaya  |                      |                   |            |           |                |
|        |                     |                               | Gangguan<br>Usaha | Gangguan<br>Masyarakat | Kecepatan<br>Aparat | Sub Total | Partisipasi<br>Masyarakat | Konflik<br>Masyarakat | Stabilitas<br>Politik | Unjuk Rasa | Sub Total<br>Sosial<br>Politik | Terbuka | Non<br>Diskriminatif | Adat-<br>istiadat | Etos Kerja | Sub Total |                |
|        |                     |                               |                   |                        |                     |           |                           |                       |                       |            |                                |         |                      |                   |            |           |                |
| 0.0523 | 0.0311              | 0.0724                        | Keamanan          | 0.012                  | 0.0184              | 0.0289    | 0.0095                    | Politik               | 0.0086                | 0.0064     | 0.0071                         | 0.0141  | Budaya               | 0.2608            |            |           |                |
| 108    | PAPUA               | (117) KAB. JAYAWIJAYA         | 0,0020            | 0,0012                 | 0,0102              | 0,0134    | 0,0037                    | 0,0095                | 0,0094                | 0,0005     | 0,0231                         | 0,0003  | 0,0002               | 0,0012            | 0,0009     | 0,0026    | 0,0391         |
| 109    | PAPUA               | (116) KAB. MIMIKA             | 0,0020            | 0,0012                 | 0,0102              | 0,0134    | 0,0037                    | 0,0095                | 0,0094                | 0,0005     | 0,0231                         | 0,0003  | 0,0002               | 0,0012            | 0,0009     | 0,0026    | 0,0391         |
| 110    | SUMATERA BARAT      | (49) KAB. SOLOK               | 0,0062            | 0,0036                 | 0,0025              | 0,0123    | 0,0023                    | 0,0095                | 0,0116                | 0,0012     | 0,0246                         | 0,0006  | 0,0002               | 0,0005            | 0,0009     | 0,0022    | 0,0391         |
| 111    | LAMPUNG             | (145) KAB. LAMPUNG SELATAN    | 0,0062            | 0,0036                 | 0,0102              | 0,0200    | 0,0023                    | 0,0011                | 0,0094                | 0,0003     | 0,0131                         | 0,0012  | 0,0009               | 0,0012            | 0,0019     | 0,0052    | 0,0383         |
| 112    | SUMATERA SELATAN    | (125) KAB. OGAN KOMERING ILIR | 0,0034            | 0,0036                 | 0,0102              | 0,0172    | 0,0023                    | 0,0024                | 0,0094                | 0,0025     | 0,0166                         | 0,0012  | 0,0009               | 0,0012            | 0,0009     | 0,0042    | 0,0380         |
| 113    | JAWA TIMUR          | (55) KAB. SIDOARJO            | 0,0062            | 0,0036                 | 0,0102              | 0,0200    | 0,0037                    | 0,0011                | 0,0020                | 0,0005     | 0,0073                         | 0,0012  | 0,0009               | 0,0012            | 0,0067     | 0,0100    | 0,0373         |
| 114    | JAWA TIMUR          | (147) KAB. PONOROGO           | 0,0034            | 0,0021                 | 0,0025              | 0,0080    | 0,0023                    | 0,0048                | 0,0116                | 0,0049     | 0,0236                         | 0,0012  | 0,0009               | 0,0012            | 0,0019     | 0,0052    | 0,0368         |
| 115    | JAWA TENGAH         | (110) KAB. PEKALONGAN         | 0,0034            | 0,0012                 | 0,0102              | 0,0148    | 0,0023                    | 0,0024                | 0,0116                | 0,0003     | 0,0166                         | 0,0012  | 0,0009               | 0,0012            | 0,0019     | 0,0052    | 0,0366         |
| 116    | JAWA TIMUR          | (58) KAB. GRESIK              | 0,0020            | 0,0021                 | 0,0025              | 0,0066    | 0,0037                    | 0,0048                | 0,0116                | 0,0049     | 0,0250                         | 0,0012  | 0,0009               | 0,0005            | 0,0019     | 0,0045    | 0,0361         |
| 117    | DIY                 | (121) KAB. GUNUNG KIDUL       | 0,0062            | 0,0080                 | 0,0102              | 0,0244    | 0,0023                    | 0,0011                | 0,0048                | 0,0003     | 0,0085                         | 0,0003  | 0,0004               | 0,0005            | 0,0019     | 0,0031    | 0,0360         |
| 118    | SUMATERA SELATAN    | (67) KAB. MUARA ENIM          | 0,0034            | 0,0036                 | 0,0025              | 0,0095    | 0,0023                    | 0,0024                | 0,0094                | 0,0012     | 0,0153                         | 0,0041  | 0,0018               | 0,0012            | 0,0040     | 0,0111    | 0,0359         |
| 119    | JAWA BARAT          | (89) KAB. CIREBON             | 0,0020            | 0,0036                 | 0,0102              | 0,0158    | 0,0023                    | 0,0024                | 0,0094                | 0,0003     | 0,0144                         | 0,0012  | 0,0009               | 0,0012            | 0,0019     | 0,0052    | 0,0354         |
| 120    | KALIMANTAN TIMUR    | (81) KAB. BERAU               | 0,0020            | 0,0021                 | 0,0048              | 0,0089    | 0,0037                    | 0,0048                | 0,0116                | 0,0049     | 0,0250                         | 0,0003  | 0,0002               | 0,0005            | 0,0005     | 0,0015    | 0,0354         |
| 121    | JAWA TENGAH         | (87) KAB. KUDUS               | 0,0034            | 0,0036                 | 0,0102              | 0,0172    | 0,0037                    | 0,0011                | 0,0048                | 0,0012     | 0,0108                         | 0,0025  | 0,0009               | 0,0020            | 0,0019     | 0,0073    | 0,0353         |
| 122    | NUSA TENGGARA BARAT | (138) KAB. LOMBOK BARAT       | 0,0062            | 0,0036                 | 0,0048              | 0,0146    | 0,0023                    | 0,0024                | 0,0094                | 0,0025     | 0,0166                         | 0,0012  | 0,0004               | 0,0012            | 0,0009     | 0,0037    | 0,0349         |
| 123    | KALIMANTAN BARAT    | (108) KAB. PONTIANAK          | 0,0020            | 0,0012                 | 0,0102              | 0,0134    | 0,0023                    | 0,0048                | 0,0116                | 0,0012     | 0,0199                         | 0,0003  | 0,0002               | 0,0005            | 0,0005     | 0,0015    | 0,0348         |
| 124    | BANTEN              | (94) KAB. SERANG              | 0,0034            | 0,0021                 | 0,0048              | 0,0103    | 0,0030                    | 0,0024                | 0,0116                | 0,0049     | 0,0219                         | 0,0003  | 0,0004               | 0,0012            | 0,0005     | 0,0024    | 0,0346         |
| 125    | JAWA BARAT          | (32) KAB. BEKASI              | 0,0020            | 0,0021                 | 0,0048              | 0,0089    | 0,0023                    | 0,0024                | 0,0116                | 0,0012     | 0,0175                         | 0,0041  | 0,0002               | 0,0020            | 0,0019     | 0,0082    | 0,0346         |
| 126    | BANGKA BELITUNG     | (61) KAB. BANGKA              | 0,0020            | 0,0021                 | 0,0102              | 0,0143    | 0,0023                    | 0,0095                | 0,0020                | 0,0049     | 0,0187                         | 0,0003  | 0,0002               | 0,0005            | 0,0005     | 0,0015    | 0,0345         |
| 127    | JAWA BARAT          | (100) KAB. BOGOR              | 0,0062            | 0,0036                 | 0,0102              | 0,0200    | 0,0023                    | 0,0011                | 0,0048                | 0,0012     | 0,0094                         | 0,0012  | 0,0004               | 0,0012            | 0,0019     | 0,0047    | 0,0341         |
| 128    | JAWA TENGAH         | (129) KAB. JEPARA             | 0,0062            | 0,0021                 | 0,0025              | 0,0108    | 0,0023                    | 0,0024                | 0,0116                | 0,0005     | 0,0168                         | 0,0025  | 0,0009               | 0,0012            | 0,0019     | 0,0065    | 0,0341         |
| 129    | JAWA TIMUR          | (144) KAB. JEMBER             | 0,0020            | 0,0012                 | 0,0102              | 0,0134    | 0,0023                    | 0,0024                | 0,0116                | 0,0012     | 0,0175                         | 0,0006  | 0,0004               | 0,0003            | 0,0019     | 0,0032    | 0,0341         |
| 130    | SULAWESI TENGAH     | (99) KAB. MOROWALI            | 0,0020            | 0,0012                 | 0,0025              | 0,0057    | 0,0037                    | 0,0095                | 0,0116                | 0,0005     | 0,0253                         | 0,0003  | 0,0002               | 0,0003            | 0,0019     | 0,0027    | 0,0337         |
| 131    | NUSA TENGGARA BARAT | (123) KAB. DOMPU              | 0,0062            | 0,0036                 | 0,0102              | 0,0200    | 0,0030                    | 0,0007                | 0,0048                | 0,0012     | 0,0097                         | 0,0012  | 0,0009               | 0,0012            | 0,0005     | 0,0038    | 0,0335         |
| 132    | SULAWESI SELATAN    | (63) KAB. BARRU               | 0,0062            | 0,0036                 | 0,0102              | 0,0200    | 0,0023                    | 0,0011                | 0,0048                | 0,0012     | 0,0094                         | 0,0006  | 0,0009               | 0,0005            | 0,0019     | 0,0039    | 0,0333         |
| 133    | SUMATERA UTARA      | (97) KAB. TANAH KARO          | 0,0062            | 0,0036                 | 0,0102              | 0,0200    | 0,0023                    | 0,0024                | 0,0048                | 0,0005     | 0,0100                         | 0,0006  | 0,0004               | 0,0012            | 0,0009     | 0,0031    | 0,0331         |
| 134    | KALIMANTAN TIMUR    | (82) KAB. KUTAI KERTANEGARA   | 0,0020            | 0,0012                 | 0,0025              | 0,0057    | 0,0037                    | 0,0048                | 0,0116                | 0,0005     | 0,0206                         | 0,0025  | 0,0009               | 0,0012            | 0,0019     | 0,0065    | 0,0328         |

| NO.    | PROPINSI            | KABUPATEN                    | SOSIAL POLITIK    |                        |                     |           |                           |                       |                       |            |                                |         |                      |                   |            | TOTAL<br>SCORE |           |
|--------|---------------------|------------------------------|-------------------|------------------------|---------------------|-----------|---------------------------|-----------------------|-----------------------|------------|--------------------------------|---------|----------------------|-------------------|------------|----------------|-----------|
|        |                     |                              | Keamanan          |                        |                     |           | Sosial Politik            |                       |                       |            |                                | Budaya  |                      |                   |            |                |           |
|        |                     |                              | Gangguan<br>Usaha | Gangguan<br>Masyarakat | Kecepatan<br>Aparat | Sub Total | Partisipasi<br>Masyarakat | Konflik<br>Masyarakat | Stabilitas<br>Politik | Unjuk Rasa | Sub Total<br>Sosial<br>Politik | Terbuka | Non<br>Diskriminatif | Adat-<br>istiadat | Etos Kerja |                | Sub Total |
|        |                     |                              |                   |                        |                     |           |                           |                       |                       |            |                                |         |                      |                   |            |                |           |
| 0.0523 | 0.0311              | 0.0724                       | Keamanan          | 0.012                  | 0.0184              | 0.0289    | 0.0095                    | Politik               | 0.0086                | 0.0064     | 0.0071                         | 0.0141  | Budaya               | 0.2608            |            |                |           |
| 135    | JAWA TENGAH         | (134) KAB. PEMALANG          | 0,0034            | 0,0036                 | 0,0048              | 0,0118    | 0,0023                    | 0,0024                | 0,0094                | 0,0003     | 0,0144                         | 0,0012  | 0,0009               | 0,0020            | 0,0019     | 0,0060         | 0,0322    |
| 136    | BENGKULU            | (127) KAB. BENGKULU SELATAN  | 0,0034            | 0,0036                 | 0,0102              | 0,0172    | 0,0023                    | 0,0011                | 0,0048                | 0,0025     | 0,0107                         | 0,0012  | 0,0009               | 0,0012            | 0,0009     | 0,0042         | 0,0321    |
| 137    | BANTEN              | (65) KAB. TANGERANG          | 0,0062            | 0,0021                 | 0,0102              | 0,0185    | 0,0023                    | 0,0024                | 0,0048                | 0,0003     | 0,0098                         | 0,0003  | 0,0004               | 0,0012            | 0,0019     | 0,0038         | 0,0321    |
| 138    | JAWA TIMUR          | (118) KAB. LAMONGAN          | 0,0034            | 0,0036                 | 0,0025              | 0,0095    | 0,0023                    | 0,0024                | 0,0116                | 0,0005     | 0,0168                         | 0,0012  | 0,0009               | 0,0012            | 0,0019     | 0,0052         | 0,0315    |
| 139    | JAWA TENGAH         | (51) KAB. CILACAP            | 0,0020            | 0,0021                 | 0,0048              | 0,0089    | 0,0023                    | 0,0024                | 0,0116                | 0,0012     | 0,0175                         | 0,0006  | 0,0009               | 0,0012            | 0,0019     | 0,0046         | 0,0310    |
| 140    | SULAWESI TENGAH     | (119) KAB. POSO              | 0,0020            | 0,0012                 | 0,0102              | 0,0134    | 0,0037                    | 0,0011                | 0,0094                | 0,0005     | 0,0147                         | 0,0003  | 0,0002               | 0,0012            | 0,0009     | 0,0026         | 0,0307    |
| 141    | JAWA TIMUR          | (133) KAB. BANYUWANGI        | 0,0034            | 0,0036                 | 0,0025              | 0,0095    | 0,0023                    | 0,0024                | 0,0116                | 0,0012     | 0,0175                         | 0,0006  | 0,0002               | 0,0005            | 0,0019     | 0,0032         | 0,0302    |
| 142    | SUMATERA SELATAN    | (76) KAB. MUSI BANYUASIN     | 0,0034            | 0,0021                 | 0,0048              | 0,0103    | 0,0023                    | 0,0024                | 0,0116                | 0,0005     | 0,0168                         | 0,0006  | 0,0002               | 0,0012            | 0,0005     | 0,0025         | 0,0296    |
| 143    | NUSA TENGGARA TIMUR | (75) KAB. TIMOR TENGAH UTARA | 0,0020            | 0,0012                 | 0,0025              | 0,0057    | 0,0023                    | 0,0095                | 0,0048                | 0,0049     | 0,0215                         | 0,0006  | 0,0002               | 0,0005            | 0,0009     | 0,0022         | 0,0294    |
| 144    | JAWA TIMUR          | (146) KAB. PAMEKASAN         | 0,0034            | 0,0012                 | 0,0025              | 0,0071    | 0,0023                    | 0,0024                | 0,0116                | 0,0025     | 0,0188                         | 0,0003  | 0,0009               | 0,0003            | 0,0019     | 0,0034         | 0,0293    |
| 145    | JAWA TIMUR          | (134) KAB. BANGKALAN         | 0,0020            | 0,0012                 | 0,0025              | 0,0057    | 0,0023                    | 0,0024                | 0,0116                | 0,0025     | 0,0188                         | 0,0003  | 0,0009               | 0,0012            | 0,0019     | 0,0043         | 0,0288    |
| 146    | NUSA TENGGARA BARAT | (141) KAB. BIMA              | 0,0034            | 0,0021                 | 0,0102              | 0,0157    | 0,0023                    | 0,0011                | 0,0048                | 0,0003     | 0,0085                         | 0,0003  | 0,0002               | 0,0020            | 0,0009     | 0,0034         | 0,0276    |
| 147    | JAWA TENGAH         | (136) KAB. BANYUMAS          | 0,0020            | 0,0012                 | 0,0025              | 0,0057    | 0,0023                    | 0,0024                | 0,0116                | 0,0005     | 0,0168                         | 0,0003  | 0,0009               | 0,0012            | 0,0019     | 0,0043         | 0,0268    |
| 148    | JAWA BARAT          | (105) KAB. BANDUNG           | 0,0062            | 0,0036                 | 0,0048              | 0,0146    | 0,0023                    | 0,0024                | 0,0048                | 0,0012     | 0,0107                         | 0,0003  | 0,0002               | 0,0005            | 0,0005     | 0,0015         | 0,0268    |
| 149    | JAWA TIMUR          | (135) KAB. PASURUAN          | 0,0020            | 0,0012                 | 0,0102              | 0,0134    | 0,0023                    | 0,0007                | 0,0048                | 0,0003     | 0,0081                         | 0,0012  | 0,0009               | 0,0012            | 0,0009     | 0,0042         | 0,0257    |
| 150    | SUMATERA UTARA      | (38) KAB. LABUHAN BATU       | 0,0034            | 0,0021                 | 0,0025              | 0,0080    | 0,0023                    | 0,0024                | 0,0048                | 0,0012     | 0,0107                         | 0,0012  | 0,0009               | 0,0012            | 0,0019     | 0,0052         | 0,0239    |
| 151    | JAWA TIMUR          | (140) KAB. MOJOKERTO         | 0,0020            | 0,0012                 | 0,0048              | 0,0080    | 0,0037                    | 0,0007                | 0,0020                | 0,0003     | 0,0067                         | 0,0012  | 0,0009               | 0,0020            | 0,0040     | 0,0081         | 0,0228    |
| 152    | KALIMANTAN SELATAN  | (130) KAB. TANAH LAUT        | 0,0020            | 0,0012                 | 0,0025              | 0,0057    | 0,0037                    | 0,0048                | 0,0048                | 0,0005     | 0,0138                         | 0,0003  | 0,0002               | 0,0012            | 0,0009     | 0,0026         | 0,0221    |
| 153    | DIY                 | (143) KAB. BANTUL            | 0,0034            | 0,0012                 | 0,0025              | 0,0071    | 0,0023                    | 0,0011                | 0,0048                | 0,0003     | 0,0085                         | 0,0006  | 0,0004               | 0,0012            | 0,0019     | 0,0041         | 0,0197    |
| 154    | NUSA TENGGARA TIMUR | (148) KAB. FLORES TIMUR      | 0,0020            | 0,0012                 | 0,0025              | 0,0057    | 0,0037                    | 0,0024                | 0,0048                | 0,0003     | 0,0112                         | 0,0003  | 0,0002               | 0,0012            | 0,0009     | 0,0026         | 0,0195    |
| 155    | LAMPUNG             | (142) KAB. LAMPUNG TIMUR     | 0,0020            | 0,0012                 | 0,0025              | 0,0057    | 0,0023                    | 0,0024                | 0,0048                | 0,0005     | 0,0100                         | 0,0006  | 0,0004               | 0,0012            | 0,0009     | 0,0031         | 0,0188    |
| 156    | SUMATERA UTARA      | (131) KAB. DELI SERDANG      | 0,0020            | 0,0012                 | 0,0025              | 0,0057    | 0,0023                    | 0,0024                | 0,0048                | 0,0005     | 0,0100                         | 0,0006  | 0,0002               | 0,0003            | 0,0005     | 0,0016         | 0,0173    |



**Lampiran 4.6.1.3. Hasil Pembobotan (Score) Indikator, Variabel, Faktor Ekonomi Daerah 156 Kabupaten di Indonesia**

| NO. | PROPINSI           | KABUPATEN                      | EKONOMI DAERAH    |        |        |                                 |                           |                             |                            |                                  | TOTAL<br>SCORE |
|-----|--------------------|--------------------------------|-------------------|--------|--------|---------------------------------|---------------------------|-----------------------------|----------------------------|----------------------------------|----------------|
|     |                    |                                | Potensi Ekonomi   |        |        |                                 | Struktur Ekonomi          |                             |                            |                                  |                |
|     |                    |                                | PDRB<br>Perkapita | Tumbuh | IPM    | Sub Total<br>Potensi<br>Ekonomi | Nilai<br>Tambah<br>Primer | Nilai<br>Tambah<br>Sekunder | Nilai<br>Tambah<br>Tersier | Sub Total<br>Struktur<br>Ekonomi |                |
|     |                    |                                |                   |        |        |                                 |                           |                             |                            |                                  | 0.0481         |
|     |                    |                                |                   |        |        |                                 |                           |                             |                            | 0.1676                           |                |
| 1   | SUMATERA UTARA     | (44) KAB. ASAHAN               | 0,0247            | 0,0222 | 0,0051 | 0,0520                          | 0,0042                    | 0,0069                      | 0,0004                     | 0,0115                           | 0,0635         |
| 2   | SUMATERA UTARA     | (38) KAB. LABUHAN BATU         | 0,0247            | 0,0222 | 0,0051 | 0,0520                          | 0,0042                    | 0,0069                      | 0,0004                     | 0,0115                           | 0,0635         |
| 3   | KALIMANTAN TIMUR   | (81) KAB. BERAU                | 0,0247            | 0,0222 | 0,0051 | 0,0520                          | 0,0076                    | 0,0023                      | 0,0008                     | 0,0107                           | 0,0627         |
| 4   | JAWA BARAT         | (1) KAB. PURWAKARTA            | 0,0247            | 0,0222 | 0,0051 | 0,0520                          | 0,0009                    | 0,0069                      | 0,0019                     | 0,0097                           | 0,0617         |
| 5   | JAWA TENGAH        | (51) KAB. CILACAP              | 0,0247            | 0,0222 | 0,0051 | 0,0520                          | 0,0009                    | 0,0069                      | 0,0019                     | 0,0097                           | 0,0617         |
| 6   | KALIMANTAN TIMUR   | (66) KAB. KUTAI TIMUR          | 0,0247            | 0,0222 | 0,0051 | 0,0520                          | 0,0076                    | 0,0010                      | 0,0004                     | 0,0090                           | 0,0610         |
| 7   | SULAWESI SELATAN   | (28) KAB. LUWU UTARA           | 0,0247            | 0,0222 | 0,0051 | 0,0520                          | 0,0076                    | 0,0006                      | 0,0004                     | 0,0086                           | 0,0606         |
| 8   | JAWA BARAT         | (32) KAB. BEKASI               | 0,0247            | 0,0222 | 0,0051 | 0,0520                          | 0,0009                    | 0,0069                      | 0,0004                     | 0,0082                           | 0,0602         |
| 9   | JAWA BARAT         | (12) KAB. INDRAMAYU            | 0,0247            | 0,0222 | 0,0008 | 0,0477                          | 0,0076                    | 0,0023                      | 0,0004                     | 0,0103                           | 0,0580         |
| 10  | KALIMANTAN SELATAN | (23) KAB. TABALONG             | 0,0247            | 0,0222 | 0,0014 | 0,0483                          | 0,0076                    | 0,0006                      | 0,0004                     | 0,0086                           | 0,0569         |
| 11  | KALIMANTAN TIMUR   | (53) KAB. PASIR                | 0,0247            | 0,0133 | 0,0051 | 0,0431                          | 0,0076                    | 0,0023                      | 0,0004                     | 0,0103                           | 0,0534         |
| 12  | SULAWESI TENGAH    | (99) KAB. MOROWALI             | 0,0247            | 0,0133 | 0,0051 | 0,0431                          | 0,0076                    | 0,0010                      | 0,0008                     | 0,0094                           | 0,0525         |
| 13  | JAMBI              | (20) KAB. TANJUNG JABUNG TIMUR | 0,0247            | 0,0133 | 0,0051 | 0,0431                          | 0,0076                    | 0,0010                      | 0,0004                     | 0,0090                           | 0,0521         |
| 14  | SUMATERA UTARA     | (97) KAB. TANAH KARO           | 0,0126            | 0,0222 | 0,0079 | 0,0427                          | 0,0076                    | 0,0006                      | 0,0008                     | 0,0090                           | 0,0517         |
| 15  | SULAWESI TENGAH    | (45) KAB. TOLI TOLI            | 0,0126            | 0,0222 | 0,0051 | 0,0399                          | 0,0076                    | 0,0010                      | 0,0019                     | 0,0105                           | 0,0504         |
| 16  | KALIMANTAN TENGAH  | (7) KAB. BARITO UTARA          | 0,0247            | 0,0062 | 0,0079 | 0,0388                          | 0,0076                    | 0,0010                      | 0,0008                     | 0,0094                           | 0,0482         |
| 17  | JAWA TIMUR         | (58) KAB. GRESIK               | 0,0247            | 0,0062 | 0,0079 | 0,0388                          | 0,0009                    | 0,0069                      | 0,0008                     | 0,0086                           | 0,0474         |
| 18  | BALI               | (34) KAB. BADUNG               | 0,0247            | 0,0062 | 0,0079 | 0,0388                          | 0,0009                    | 0,0010                      | 0,0048                     | 0,0067                           | 0,0455         |
| 19  | SULAWESI UTARA     | (20) KAB. MINAHASA             | 0,0062            | 0,0222 | 0,0086 | 0,0370                          | 0,0042                    | 0,0023                      | 0,0019                     | 0,0084                           | 0,0454         |
| 20  | KALIMANTAN SELATAN | (37) KAB. HULU SUNGAI UTARA    | 0,0126            | 0,0222 | 0,0008 | 0,0356                          | 0,0076                    | 0,0010                      | 0,0008                     | 0,0094                           | 0,0450         |
| 21  | JAWA TIMUR         | (55) KAB. SIDOARJO             | 0,0247            | 0,0016 | 0,0086 | 0,0349                          | 0,0009                    | 0,0069                      | 0,0019                     | 0,0097                           | 0,0446         |
| 22  | SULAWESI TENGAH    | (10) KAB. BANGGAI              | 0,0062            | 0,0222 | 0,0051 | 0,0335                          | 0,0076                    | 0,0023                      | 0,0008                     | 0,0107                           | 0,0442         |
| 23  | RIAU               | (22) KAB. PELALAWAN            | 0,0062            | 0,0222 | 0,0051 | 0,0335                          | 0,0076                    | 0,0023                      | 0,0004                     | 0,0103                           | 0,0438         |
| 24  | KALIMANTAN TIMUR   | (3) KAB. BULUNGAN              | 0,0247            | 0,0016 | 0,0079 | 0,0342                          | 0,0076                    | 0,0010                      | 0,0004                     | 0,0090                           | 0,0432         |
| 25  | RIAU               | (81) KAB. KUANTAN SENGGIGI     | 0,0062            | 0,0222 | 0,0051 | 0,0335                          | 0,0076                    | 0,0010                      | 0,0008                     | 0,0094                           | 0,0429         |
| 26  | LAMPUNG            | (142) KAB. LAMPUNG TIMUR       | 0,0062            | 0,0222 | 0,0051 | 0,0335                          | 0,0076                    | 0,0010                      | 0,0008                     | 0,0094                           | 0,0429         |



| NO. | PROPINSI            | KABUPATEN                        | EKONOMI DAERAH    |        |        |                                 |                           |                             |                            |                                  | TOTAL<br>SCORE |
|-----|---------------------|----------------------------------|-------------------|--------|--------|---------------------------------|---------------------------|-----------------------------|----------------------------|----------------------------------|----------------|
|     |                     |                                  | Potensi Ekonomi   |        |        |                                 | Struktur Ekonomi          |                             |                            |                                  |                |
|     |                     |                                  | PDRB<br>Perkapita | Tumbuh | IPM    | Sub Total<br>Potensi<br>Ekonomi | Nilai<br>Tambah<br>Primer | Nilai<br>Tambah<br>Sekunder | Nilai<br>Tambah<br>Tersier | Sub Total<br>Struktur<br>Ekonomi |                |
|     |                     |                                  |                   |        |        |                                 |                           |                             |                            |                                  |                |
| 27  | SUMATERA UTARA      | (56) KAB. DAIRI                  | 0,0062            | 0,0222 | 0,0051 | 0,0335                          | 0,0076                    | 0,0010                      | 0,0004                     | 0,0090                           | 0,0425         |
| 28  | KALIMANTAN TIMUR    | (17) KAB. NUNUKAN                | 0,0062            | 0,0222 | 0,0051 | 0,0335                          | 0,0076                    | 0,0010                      | 0,0004                     | 0,0090                           | 0,0425         |
| 29  | JAWA TENGAH         | (87) KAB. KUDUS                  | 0,0247            | 0,0016 | 0,0051 | 0,0314                          | 0,0009                    | 0,0069                      | 0,0019                     | 0,0097                           | 0,0411         |
| 30  | SUMATERA SELATAN    | (76) KAB. MUSI BANYUASIN         | 0,0247            | 0,0016 | 0,0051 | 0,0314                          | 0,0076                    | 0,0010                      | 0,0004                     | 0,0090                           | 0,0404         |
| 31  | KALIMANTAN TIMUR    | (82) KAB. KUTAI KERTANEGARA      | 0,0247            | 0,0016 | 0,0051 | 0,0314                          | 0,0076                    | 0,0010                      | 0,0004                     | 0,0090                           | 0,0404         |
| 32  | SUMATERA SELATAN    | (67) KAB. MUARA ENIM             | 0,0247            | 0,0016 | 0,0051 | 0,0314                          | 0,0076                    | 0,0006                      | 0,0004                     | 0,0086                           | 0,0400         |
| 33  | RIAU                | (42) KAB. ROKAN HULU             | 0,0030            | 0,0222 | 0,0051 | 0,0303                          | 0,0076                    | 0,0010                      | 0,0008                     | 0,0094                           | 0,0397         |
| 34  | PAPUA               | (31) KAB. MANOKWARI              | 0,0247            | 0,0030 | 0,0008 | 0,0285                          | 0,0076                    | 0,0023                      | 0,0008                     | 0,0107                           | 0,0392         |
| 35  | KALIMANTAN BARAT    | (74) KAB. SANGGAU                | 0,0062            | 0,0222 | 0,0014 | 0,0298                          | 0,0042                    | 0,0043                      | 0,0008                     | 0,0093                           | 0,0391         |
| 36  | SULAWESI SELATAN    | (36) KAB. MAROS                  | 0,0062            | 0,0222 | 0,0051 | 0,0335                          | 0,0042                    | 0,0006                      | 0,0004                     | 0,0052                           | 0,0387         |
| 37  | SULAWESI TENGAH     | (84) KAB. DONGGALA               | 0,0247            | 0,0016 | 0,0014 | 0,0277                          | 0,0076                    | 0,0010                      | 0,0008                     | 0,0094                           | 0,0371         |
| 38  | PAPUA               | (46) KAB. SORONG                 | 0,0247            | 0,0016 | 0,0014 | 0,0277                          | 0,0076                    | 0,0010                      | 0,0004                     | 0,0090                           | 0,0367         |
| 39  | BANGKA BELITUNG     | (61) KAB. BANGKA                 | 0,0126            | 0,0062 | 0,0051 | 0,0239                          | 0,0042                    | 0,0069                      | 0,0004                     | 0,0115                           | 0,0354         |
| 40  | SULAWESI UTARA      | (16) KAB. SANGIHE                | 0,0030            | 0,0133 | 0,0079 | 0,0242                          | 0,0076                    | 0,0010                      | 0,0019                     | 0,0105                           | 0,0347         |
| 41  | SULAWESI TENGGARA   | (33) KAB. KOLAKA                 | 0,0126            | 0,0062 | 0,0051 | 0,0239                          | 0,0076                    | 0,0023                      | 0,0008                     | 0,0107                           | 0,0346         |
| 42  | NUSA TENGGARA BARAT | (93) KAB. LOMBOK TIMUR           | 0,0247            | 0,0016 | 0,0008 | 0,0271                          | 0,0042                    | 0,0010                      | 0,0019                     | 0,0071                           | 0,0342         |
| 43  | SUMATERA UTARA      | (91) KAB. LANGKAT                | 0,0126            | 0,0062 | 0,0051 | 0,0239                          | 0,0076                    | 0,0010                      | 0,0004                     | 0,0090                           | 0,0329         |
| 44  | BANGKA BELITUNG     | (27) KAB. BELITUNG               | 0,0126            | 0,0062 | 0,0051 | 0,0239                          | 0,0042                    | 0,0023                      | 0,0019                     | 0,0084                           | 0,0323         |
| 45  | BALI                | (30) KAB. GIANYAR                | 0,0126            | 0,0062 | 0,0051 | 0,0239                          | 0,0016                    | 0,0023                      | 0,0043                     | 0,0082                           | 0,0321         |
| 46  | KALIMANTAN BARAT    | (108) KAB. PONTIANAK             | 0,0126            | 0,0030 | 0,0051 | 0,0207                          | 0,0016                    | 0,0069                      | 0,0019                     | 0,0104                           | 0,0311         |
| 47  | KALIMANTAN TENGAH   | (95) KAB. BARITO SELATAN         | 0,0126            | 0,0062 | 0,0051 | 0,0239                          | 0,0042                    | 0,0010                      | 0,0019                     | 0,0071                           | 0,0310         |
| 48  | KALIMANTAN TENGAH   | (29) KAB. KAPUAS                 | 0,0062            | 0,0062 | 0,0079 | 0,0203                          | 0,0076                    | 0,0010                      | 0,0019                     | 0,0105                           | 0,0308         |
| 49  | BALI                | (4) KAB. JEMBRANA                | 0,0062            | 0,0062 | 0,0079 | 0,0203                          | 0,0042                    | 0,0010                      | 0,0048                     | 0,0100                           | 0,0303         |
| 50  | SULAWESI SELATAN    | (21) KAB. PANGKAJENE & KEPULAUAN | 0,0062            | 0,0133 | 0,0014 | 0,0209                          | 0,0016                    | 0,0069                      | 0,0004                     | 0,0089                           | 0,0298         |
| 51  | SUMATERA UTARA      | (131) KAB. DELI SERDANG          | 0,0062            | 0,0062 | 0,0079 | 0,0203                          | 0,0042                    | 0,0043                      | 0,0008                     | 0,0093                           | 0,0296         |
| 52  | BANTEN              | (65) KAB. TANGERANG              | 0,0062            | 0,0062 | 0,0079 | 0,0203                          | 0,0009                    | 0,0069                      | 0,0008                     | 0,0086                           | 0,0289         |
| 53  | SUMATERA UTARA      | (104) KAB. SIMALUNGUN            | 0,0062            | 0,0062 | 0,0051 | 0,0175                          | 0,0076                    | 0,0023                      | 0,0004                     | 0,0103                           | 0,0278         |

| NO. | PROPINSI            | KABUPATEN                      | EKONOMI DAERAH    |        |        |                                 |                           |                             |                            |                                  | TOTAL<br>SCORE |
|-----|---------------------|--------------------------------|-------------------|--------|--------|---------------------------------|---------------------------|-----------------------------|----------------------------|----------------------------------|----------------|
|     |                     |                                | Potensi Ekonomi   |        |        |                                 | Struktur Ekonomi          |                             |                            |                                  |                |
|     |                     |                                | PDRB<br>Perkapita | Tumbuh | IPM    | Sub Total<br>Potensi<br>Ekonomi | Nilai<br>Tambah<br>Primer | Nilai<br>Tambah<br>Sekunder | Nilai<br>Tambah<br>Tersier | Sub Total<br>Struktur<br>Ekonomi |                |
|     |                     |                                |                   |        |        |                                 | 0.0219                    | 0.0151                      | 0.0123                     |                                  |                |
|     |                     |                                | 0.0481            | 0.0463 | 0.0239 |                                 | 0.0219                    | 0.0151                      | 0.0123                     |                                  | 0.1676         |
| 54  | J A M B I           | (79) KAB. KERINCI              | 0,0062            | 0,0062 | 0,0051 | 0,0175                          | 0,0042                    | 0,0010                      | 0,0043                     | 0,0095                           | 0,0270         |
| 55  | SULAWESI SELATAN    | (60) KAB. PINRANG              | 0,0062            | 0,0062 | 0,0051 | 0,0175                          | 0,0076                    | 0,0010                      | 0,0008                     | 0,0094                           | 0,0269         |
| 56  | NUSA TENGGARA BARAT | (123) KAB. DOMPU               | 0,0126            | 0,0030 | 0,0008 | 0,0164                          | 0,0076                    | 0,0010                      | 0,0019                     | 0,0105                           | 0,0269         |
| 57  | KALIMANTAN BARAT    | (126) KAB. KAPUAS HULU         | 0,0062            | 0,0062 | 0,0014 | 0,0138                          | 0,0076                    | 0,0010                      | 0,0043                     | 0,0129                           | 0,0267         |
| 58  | LAMPUNG             | (59) KAB. LAMPUNG BARAT        | 0,0030            | 0,0133 | 0,0014 | 0,0177                          | 0,0076                    | 0,0006                      | 0,0008                     | 0,0090                           | 0,0267         |
| 59  | BALI                | (21) KAB. TABANAN              | 0,0062            | 0,0030 | 0,0079 | 0,0171                          | 0,0042                    | 0,0010                      | 0,0043                     | 0,0095                           | 0,0266         |
| 60  | R I A U             | (70) KAB. BENGKALIS            | 0,0062            | 0,0016 | 0,0079 | 0,0157                          | 0,0042                    | 0,0023                      | 0,0043                     | 0,0108                           | 0,0265         |
| 61  | JAWA TENGAH         | (102) KAB. KARANG ANYAR        | 0,0062            | 0,0016 | 0,0079 | 0,0157                          | 0,0016                    | 0,0069                      | 0,0019                     | 0,0104                           | 0,0261         |
| 62  | DIY                 | (121) KAB. GUNUNG KIDUL        | 0,0062            | 0,0062 | 0,0051 | 0,0175                          | 0,0042                    | 0,0023                      | 0,0019                     | 0,0084                           | 0,0259         |
| 63  | PAPUA               | (117) KAB. JAYAWIJAYA          | 0,0016            | 0,0133 | 0,0008 | 0,0157                          | 0,0076                    | 0,0006                      | 0,0019                     | 0,0101                           | 0,0258         |
| 64  | JAWA TIMUR          | (134) KAB. TULUNGAGUNG         | 0,0062            | 0,0062 | 0,0051 | 0,0175                          | 0,0016                    | 0,0023                      | 0,0043                     | 0,0082                           | 0,0257         |
| 65  | SUMATERA BARAT      | (35) KAB. PESISIR SELATAN      | 0,0062            | 0,0030 | 0,0051 | 0,0143                          | 0,0042                    | 0,0023                      | 0,0043                     | 0,0108                           | 0,0251         |
| 66  | JAWA BARAT          | (57) KAB. CIAMIS               | 0,0062            | 0,0030 | 0,0051 | 0,0143                          | 0,0042                    | 0,0023                      | 0,0043                     | 0,0108                           | 0,0251         |
| 67  | JAMBI               | (68) KAB. TEBO                 | 0,0030            | 0,0062 | 0,0051 | 0,0143                          | 0,0076                    | 0,0010                      | 0,0019                     | 0,0105                           | 0,0248         |
| 68  | SULAWESI SELATAN    | (72) KAB. MAJENE               | 0,0030            | 0,0062 | 0,0051 | 0,0143                          | 0,0076                    | 0,0010                      | 0,0019                     | 0,0105                           | 0,0248         |
| 69  | SULAWESI SELATAN    | (25) KAB. TANA TORAJA          | 0,0030            | 0,0062 | 0,0051 | 0,0143                          | 0,0076                    | 0,0010                      | 0,0019                     | 0,0105                           | 0,0248         |
| 70  | SULAWESI SELATAN    | (19) KAB. GOWA                 | 0,0030            | 0,0062 | 0,0051 | 0,0143                          | 0,0076                    | 0,0010                      | 0,0019                     | 0,0105                           | 0,0248         |
| 71  | R I A U             | (101) KAB. INDRAGIRI HILIR     | 0,0062            | 0,0062 | 0,0051 | 0,0175                          | 0,0042                    | 0,0010                      | 0,0019                     | 0,0071                           | 0,0246         |
| 72  | J A M B I           | (90) KAB. BUNGO                | 0,0062            | 0,0062 | 0,0051 | 0,0175                          | 0,0042                    | 0,0010                      | 0,0019                     | 0,0071                           | 0,0246         |
| 73  | KALIMANTAN SELATAN  | (109) KAB. HULU SUNGAI SELATAN | 0,0062            | 0,0062 | 0,0051 | 0,0175                          | 0,0042                    | 0,0010                      | 0,0019                     | 0,0071                           | 0,0246         |
| 74  | KALIMANTAN SELATAN  | (125) KAB. TAPIN               | 0,0062            | 0,0062 | 0,0051 | 0,0175                          | 0,0042                    | 0,0010                      | 0,0019                     | 0,0071                           | 0,0246         |
| 75  | JAWA BARAT          | (105) KAB. BANDUNG             | 0,0062            | 0,0016 | 0,0079 | 0,0157                          | 0,0009                    | 0,0069                      | 0,0008                     | 0,0086                           | 0,0243         |
| 76  | BALI                | (13) KAB. BANGLI               | 0,0062            | 0,0030 | 0,0051 | 0,0143                          | 0,0042                    | 0,0010                      | 0,0043                     | 0,0095                           | 0,0238         |
| 77  | SULAWESI SELATAN    | (6) KAB. ENREKANG              | 0,0030            | 0,0062 | 0,0051 | 0,0143                          | 0,0076                    | 0,0010                      | 0,0008                     | 0,0094                           | 0,0237         |
| 78  | SUMATERA UTARA      | (54) KAB. TAPANULI UTARA       | 0,0062            | 0,0016 | 0,0051 | 0,0129                          | 0,0076                    | 0,0010                      | 0,0019                     | 0,0105                           | 0,0234         |
| 79  | NUSA TENGGARA TIMUR | (128) KAB. NGADA               | 0,0016            | 0,0062 | 0,0051 | 0,0129                          | 0,0076                    | 0,0010                      | 0,0019                     | 0,0105                           | 0,0234         |
| 80  | JAWA TIMUR          | (83) KAB. KEDIRI               | 0,0030            | 0,0062 | 0,0051 | 0,0143                          | 0,0042                    | 0,0023                      | 0,0019                     | 0,0084                           | 0,0227         |

| NO. | PROPINSI           | KABUPATEN                      | EKONOMI DAERAH    |        |        |                                 |                           |                             |                            |                                  | TOTAL<br>SCORE |
|-----|--------------------|--------------------------------|-------------------|--------|--------|---------------------------------|---------------------------|-----------------------------|----------------------------|----------------------------------|----------------|
|     |                    |                                | Potensi Ekonomi   |        |        |                                 | Struktur Ekonomi          |                             |                            |                                  |                |
|     |                    |                                | PDRB<br>Perkapita | Tumbuh | IPM    | Sub Total<br>Potensi<br>Ekonomi | Nilai<br>Tambah<br>Primer | Nilai<br>Tambah<br>Sekunder | Nilai<br>Tambah<br>Tersier | Sub Total<br>Struktur<br>Ekonomi |                |
|     |                    |                                |                   |        |        |                                 | 0.0219                    | 0.0151                      | 0.0123                     |                                  |                |
|     |                    |                                | 0.0481            | 0.0463 | 0.0239 |                                 | 0.0219                    | 0.0151                      | 0.0123                     |                                  | 0.1676         |
| 81  | KALIMANTAN SELATAN | (130) KAB. TANAH LAUT          | 0,0062            | 0,0030 | 0,0051 | 0,0143                          | 0,0042                    | 0,0023                      | 0,0019                     | 0,0084                           | 0,0227         |
| 82  | JAWA TENGAH        | (96) KAB. KENDAL               | 0,0062            | 0,0016 | 0,0051 | 0,0129                          | 0,0016                    | 0,0069                      | 0,0008                     | 0,0093                           | 0,0222         |
| 83  | SUMATERA BARAT     | (49) KAB. SOLOK                | 0,0062            | 0,0062 | 0,0014 | 0,0138                          | 0,0042                    | 0,0023                      | 0,0019                     | 0,0084                           | 0,0222         |
| 84  | KALIMANTAN BARAT   | (113) KAB. KETAPANG            | 0,0062            | 0,0062 | 0,0014 | 0,0138                          | 0,0042                    | 0,0023                      | 0,0019                     | 0,0084                           | 0,0222         |
| 85  | JAWA TENGAH        | (129) KAB. JEPARA              | 0,0030            | 0,0062 | 0,0051 | 0,0143                          | 0,0016                    | 0,0043                      | 0,0019                     | 0,0078                           | 0,0221         |
| 86  | JAWA TIMUR         | (140) KAB. MOJOKERTO           | 0,0062            | 0,0030 | 0,0051 | 0,0143                          | 0,0016                    | 0,0043                      | 0,0019                     | 0,0078                           | 0,0221         |
| 87  | LAMPUNG            | (145) KAB. LAMPUNG SELATAN     | 0,0030            | 0,0030 | 0,0051 | 0,0111                          | 0,0076                    | 0,0023                      | 0,0008                     | 0,0107                           | 0,0218         |
| 88  | SUMATERA BARAT     | (11) KAB. SAWAHLUNTO SIJUNJUNG | 0,0062            | 0,0062 | 0,0008 | 0,0132                          | 0,0042                    | 0,0023                      | 0,0019                     | 0,0084                           | 0,0216         |
| 89  | JAWA BARAT         | (86) KAB. KARAWANG             | 0,0062            | 0,0062 | 0,0014 | 0,0138                          | 0,0016                    | 0,0043                      | 0,0019                     | 0,0078                           | 0,0216         |
| 90  | KALIMANTAN BARAT   | (85) KAB. SAMBAS               | 0,0062            | 0,0062 | 0,0008 | 0,0132                          | 0,0042                    | 0,0023                      | 0,0019                     | 0,0084                           | 0,0216         |
| 91  | SULAWESI SELATAN   | (63) KAB. BARRU                | 0,0030            | 0,0030 | 0,0051 | 0,0111                          | 0,0076                    | 0,0010                      | 0,0019                     | 0,0105                           | 0,0216         |
| 92  | PAPUA              | (116) KAB. MIMIKA              | 0,0062            | 0,0016 | 0,0051 | 0,0129                          | 0,0076                    | 0,0006                      | 0,0004                     | 0,0086                           | 0,0215         |
| 93  | SUMATERA BARAT     | (62) KAB. PASAMAN              | 0,0030            | 0,0062 | 0,0051 | 0,0143                          | 0,0042                    | 0,0010                      | 0,0019                     | 0,0071                           | 0,0214         |
| 94  | JAWA TIMUR         | (73) KAB. BLITAR               | 0,0030            | 0,0062 | 0,0051 | 0,0143                          | 0,0042                    | 0,0010                      | 0,0019                     | 0,0071                           | 0,0214         |
| 95  | J A M B I          | (39) KAB. BATANGHARI           | 0,0062            | 0,0016 | 0,0051 | 0,0129                          | 0,0042                    | 0,0023                      | 0,0019                     | 0,0084                           | 0,0213         |
| 96  | SUMATERA SELATAN   | (40) KAB. LAHAT                | 0,0062            | 0,0016 | 0,0051 | 0,0129                          | 0,0042                    | 0,0023                      | 0,0019                     | 0,0084                           | 0,0213         |
| 97  | SULAWESI TENGAH    | (119) KAB. POSO                | 0,0062            | 0,0016 | 0,0051 | 0,0129                          | 0,0042                    | 0,0023                      | 0,0019                     | 0,0084                           | 0,0213         |
| 98  | BALI               | (52) KAB. BULELENG             | 0,0062            | 0,0062 | 0,0014 | 0,0138                          | 0,0016                    | 0,0010                      | 0,0048                     | 0,0074                           | 0,0212         |
| 99  | JAWA TIMUR         | (133) KAB. BANYUWANGI          | 0,0030            | 0,0062 | 0,0014 | 0,0106                          | 0,0076                    | 0,0010                      | 0,0019                     | 0,0105                           | 0,0211         |
| 100 | DIY                | (143) KAB. BANTUL              | 0,0030            | 0,0016 | 0,0079 | 0,0125                          | 0,0042                    | 0,0023                      | 0,0019                     | 0,0084                           | 0,0209         |
| 101 | JAWA TENGAH        | (132) KAB. SUKOHARJO           | 0,0062            | 0,0016 | 0,0051 | 0,0129                          | 0,0016                    | 0,0043                      | 0,0019                     | 0,0078                           | 0,0207         |
| 102 | JAWA BARAT         | (5) KAB. KUNINGAN              | 0,0030            | 0,0030 | 0,0051 | 0,0111                          | 0,0042                    | 0,0010                      | 0,0043                     | 0,0095                           | 0,0206         |
| 103 | SULAWESI SELATAN   | (14) KAB. SINJAI               | 0,0030            | 0,0030 | 0,0051 | 0,0111                          | 0,0076                    | 0,0010                      | 0,0008                     | 0,0094                           | 0,0205         |
| 104 | SULAWESI SELATAN   | (101) KAB. LUWU                | 0,0030            | 0,0016 | 0,0051 | 0,0097                          | 0,0076                    | 0,0023                      | 0,0008                     | 0,0107                           | 0,0204         |
| 105 | LAMPUNG            | (10) KAB. LAMPUNG UTARA        | 0,0030            | 0,0016 | 0,0051 | 0,0097                          | 0,0076                    | 0,0010                      | 0,0019                     | 0,0105                           | 0,0202         |
| 106 | SULAWESI SELATAN   | (24) KAB. BANTAENG             | 0,0030            | 0,0062 | 0,0014 | 0,0106                          | 0,0076                    | 0,0010                      | 0,0008                     | 0,0094                           | 0,0200         |
| 107 | JAWA TENGAH        | (122) KAB. MAGELANG            | 0,0030            | 0,0030 | 0,0051 | 0,0111                          | 0,0042                    | 0,0023                      | 0,0019                     | 0,0084                           | 0,0195         |

| NO.    | PROPINSI            | KABUPATEN                      | EKONOMI DAERAH    |        |        |                                 |                           |                             |                            |                                  | TOTAL<br>SCORE |
|--------|---------------------|--------------------------------|-------------------|--------|--------|---------------------------------|---------------------------|-----------------------------|----------------------------|----------------------------------|----------------|
|        |                     |                                | Potensi Ekonomi   |        |        |                                 | Struktur Ekonomi          |                             |                            |                                  |                |
|        |                     |                                | PDRB<br>Perkapita | Tumbuh | IPM    | Sub Total<br>Potensi<br>Ekonomi | Nilai<br>Tambah<br>Primer | Nilai<br>Tambah<br>Sekunder | Nilai<br>Tambah<br>Tersier | Sub Total<br>Struktur<br>Ekonomi |                |
|        |                     |                                |                   |        |        |                                 |                           |                             |                            |                                  |                |
| 0.0481 | 0.0463              | 0.0239                         |                   | 0.0219 | 0.0151 | 0.0123                          |                           | 0.1676                      |                            |                                  |                |
| 108    | JAWA BARAT          | (9) KAB. TASIKMALAYA           | 0,0030            | 0,0030 | 0,0051 | 0,0111                          | 0,0016                    | 0,0023                      | 0,0043                     | 0,0082                           | 0,0193         |
| 109    | BENGKULU            | (127) KAB. BENGKULU SELATAN    | 0,0016            | 0,0030 | 0,0051 | 0,0097                          | 0,0042                    | 0,0010                      | 0,0043                     | 0,0095                           | 0,0192         |
| 110    | R I A U             | (50) KAB. KAMPAR               | 0,0030            | 0,0016 | 0,0051 | 0,0097                          | 0,0076                    | 0,0010                      | 0,0008                     | 0,0094                           | 0,0191         |
| 111    | BALI                | (48) KAB. KARANG ASEM          | 0,0062            | 0,0030 | 0,0008 | 0,0100                          | 0,0042                    | 0,0006                      | 0,0043                     | 0,0091                           | 0,0191         |
| 112    | NUSA TENGGARA TIMUR | (43) KAB. TIMOR TENGAH SELATAN | 0,0016            | 0,0062 | 0,0008 | 0,0086                          | 0,0076                    | 0,0010                      | 0,0019                     | 0,0105                           | 0,0191         |
| 113    | NUSA TENGGARA TIMUR | (75) KAB. TIMOR TENGAH UTARA   | 0,0016            | 0,0062 | 0,0008 | 0,0086                          | 0,0076                    | 0,0010                      | 0,0019                     | 0,0105                           | 0,0191         |
| 114    | SUMATERA SELATAN    | (125) KAB. OGAN KOMERING ILIR  | 0,0030            | 0,0062 | 0,0014 | 0,0106                          | 0,0042                    | 0,0023                      | 0,0019                     | 0,0084                           | 0,0190         |
| 115    | JAWA BARAT          | (124) KAB. SUKABUMI            | 0,0030            | 0,0062 | 0,0014 | 0,0106                          | 0,0042                    | 0,0023                      | 0,0019                     | 0,0084                           | 0,0190         |
| 116    | SULAWESI SELATAN    | (107) KAB. TAKALAR             | 0,0030            | 0,0062 | 0,0014 | 0,0106                          | 0,0042                    | 0,0023                      | 0,0019                     | 0,0084                           | 0,0190         |
| 117    | JAWA TENGAH         | (110) KAB. PEKALONGAN          | 0,0062            | 0,0030 | 0,0014 | 0,0106                          | 0,0016                    | 0,0043                      | 0,0019                     | 0,0078                           | 0,0184         |
| 118    | JAWA BARAT          | (100) KAB. BOGOR               | 0,0030            | 0,0016 | 0,0051 | 0,0097                          | 0,0009                    | 0,0069                      | 0,0008                     | 0,0086                           | 0,0183         |
| 119    | SUMATERA SELATAN    | (88) KAB. MUSI RAWAS           | 0,0062            | 0,0016 | 0,0014 | 0,0092                          | 0,0076                    | 0,0010                      | 0,0004                     | 0,0090                           | 0,0182         |
| 120    | JAWA BARAT          | (18) KAB. CIANJUR              | 0,0030            | 0,0030 | 0,0051 | 0,0111                          | 0,0042                    | 0,0010                      | 0,0019                     | 0,0071                           | 0,0182         |
| 121    | JAWA BARAT          | (100) KAB. SUMEDANG            | 0,0030            | 0,0016 | 0,0051 | 0,0097                          | 0,0042                    | 0,0023                      | 0,0019                     | 0,0084                           | 0,0181         |
| 122    | JAWA TENGAH         | (75) KAB. BOYOLALI             | 0,0030            | 0,0016 | 0,0051 | 0,0097                          | 0,0042                    | 0,0023                      | 0,0019                     | 0,0084                           | 0,0181         |
| 123    | JAWA TIMUR          | (2) KAB. MAGETAN               | 0,0030            | 0,0016 | 0,0051 | 0,0097                          | 0,0042                    | 0,0023                      | 0,0019                     | 0,0084                           | 0,0181         |
| 124    | JAWA TIMUR          | (98) KAB. JOMBANG              | 0,0030            | 0,0016 | 0,0051 | 0,0097                          | 0,0042                    | 0,0023                      | 0,0019                     | 0,0084                           | 0,0181         |
| 125    | NUSA TENGGARA TIMUR | (15) KAB. ENDE                 | 0,0016            | 0,0062 | 0,0008 | 0,0086                          | 0,0042                    | 0,0010                      | 0,0043                     | 0,0095                           | 0,0181         |
| 126    | SULAWESI SELATAN    | (8) KAB. JENEPONTO             | 0,0016            | 0,0062 | 0,0008 | 0,0086                          | 0,0076                    | 0,0010                      | 0,0008                     | 0,0094                           | 0,0180         |
| 127    | NUSA TENGGARA TIMUR | (115) KAB. MANGGARAI           | 0,0016            | 0,0062 | 0,0008 | 0,0086                          | 0,0076                    | 0,0010                      | 0,0008                     | 0,0094                           | 0,0180         |
| 128    | JAWA TIMUR          | (118) KAB. LAMONGAN            | 0,0030            | 0,0030 | 0,0014 | 0,0074                          | 0,0076                    | 0,0010                      | 0,0019                     | 0,0105                           | 0,0179         |
| 129    | BANTEN              | (94) KAB. SERANG               | 0,0062            | 0,0016 | 0,0014 | 0,0092                          | 0,0009                    | 0,0069                      | 0,0008                     | 0,0086                           | 0,0178         |
| 130    | LAMPUNG             | (64) KAB. WAY KANAN            | 0,0016            | 0,0016 | 0,0051 | 0,0083                          | 0,0076                    | 0,0010                      | 0,0008                     | 0,0094                           | 0,0177         |
| 131    | JAWA BARAT          | (78) KAB. SUBANG               | 0,0062            | 0,0030 | 0,0014 | 0,0106                          | 0,0042                    | 0,0010                      | 0,0019                     | 0,0071                           | 0,0177         |
| 132    | SULAWESI SELATAN    | (69) KAB. SELAYAR              | 0,0030            | 0,0062 | 0,0014 | 0,0106                          | 0,0042                    | 0,0010                      | 0,0019                     | 0,0071                           | 0,0177         |
| 133    | JAWA TENGAH         | (134) KAB. PEMALANG            | 0,0016            | 0,0062 | 0,0014 | 0,0092                          | 0,0042                    | 0,0023                      | 0,0019                     | 0,0084                           | 0,0176         |
| 134    | JAWA TENGAH         | (92) KAB. KLATEN               | 0,0030            | 0,0016 | 0,0051 | 0,0097                          | 0,0016                    | 0,0043                      | 0,0019                     | 0,0078                           | 0,0175         |

| NO. | PROPINSI            | KABUPATEN                     | EKONOMI DAERAH    |        |        |                                 |                           |                             |                            |                                  | TOTAL<br>SCORE |
|-----|---------------------|-------------------------------|-------------------|--------|--------|---------------------------------|---------------------------|-----------------------------|----------------------------|----------------------------------|----------------|
|     |                     |                               | Potensi Ekonomi   |        |        |                                 | Struktur Ekonomi          |                             |                            |                                  |                |
|     |                     |                               | PDRB<br>Perkapita | Tumbuh | IPM    | Sub Total<br>Potensi<br>Ekonomi | Nilai<br>Tambah<br>Primer | Nilai<br>Tambah<br>Sekunder | Nilai<br>Tambah<br>Tersier | Sub Total<br>Struktur<br>Ekonomi |                |
|     |                     |                               |                   |        |        |                                 | 0.0219                    | 0.0151                      | 0.0123                     |                                  |                |
|     |                     |                               | 0.0481            | 0.0463 | 0.0239 |                                 | 0.0219                    | 0.0151                      | 0.0123                     |                                  | 0.1676         |
| 135 | BANTEN              | (47) KAB. LEBAK               | 0,0030            | 0,0062 | 0,0008 | 0,0100                          | 0,0042                    | 0,0010                      | 0,0019                     | 0,0071                           | 0,0171         |
| 136 | JAWA TIMUR          | (134) KAB. BANGKALAN          | 0,0030            | 0,0062 | 0,0008 | 0,0100                          | 0,0042                    | 0,0010                      | 0,0019                     | 0,0071                           | 0,0171         |
| 137 | JAWA TIMUR          | (144) KAB. JEMBER             | 0,0030            | 0,0062 | 0,0008 | 0,0100                          | 0,0042                    | 0,0010                      | 0,0019                     | 0,0071                           | 0,0171         |
| 138 | SULAWESI SELATAN    | (80) KAB. BONE                | 0,0030            | 0,0030 | 0,0014 | 0,0074                          | 0,0076                    | 0,0010                      | 0,0008                     | 0,0094                           | 0,0168         |
| 139 | KALIMANTAN SELATAN  | (112) KAB. HULU SUNGAI TENGAH | 0,0030            | 0,0016 | 0,0051 | 0,0097                          | 0,0042                    | 0,0010                      | 0,0019                     | 0,0071                           | 0,0168         |
| 140 | JAWA TENGAH         | (136) KAB. BANYUMAS           | 0,0016            | 0,0016 | 0,0051 | 0,0083                          | 0,0042                    | 0,0023                      | 0,0019                     | 0,0084                           | 0,0167         |
| 141 | GORONTALO           | (106) KAB. GORONTALO          | 0,0016            | 0,0016 | 0,0051 | 0,0083                          | 0,0042                    | 0,0023                      | 0,0019                     | 0,0084                           | 0,0167         |
| 142 | PAPUA               | (137) KAB. FAKFAK             | 0,0016            | 0,0016 | 0,0051 | 0,0083                          | 0,0042                    | 0,0023                      | 0,0019                     | 0,0084                           | 0,0167         |
| 143 | JAWA TIMUR          | (139) KAB. BONDOWOSO          | 0,0016            | 0,0030 | 0,0008 | 0,0054                          | 0,0076                    | 0,0010                      | 0,0019                     | 0,0105                           | 0,0159         |
| 144 | JAWA TIMUR          | (135) KAB. PASURUAN           | 0,0030            | 0,0016 | 0,0008 | 0,0054                          | 0,0042                    | 0,0043                      | 0,0019                     | 0,0104                           | 0,0158         |
| 145 | SULAWESI TENGGARA   | (111) KAB. BUTON              | 0,0030            | 0,0030 | 0,0014 | 0,0074                          | 0,0042                    | 0,0023                      | 0,0019                     | 0,0084                           | 0,0158         |
| 146 | NUSA TENGGARA TIMUR | (26) KAB. BELU                | 0,0016            | 0,0062 | 0,0008 | 0,0086                          | 0,0042                    | 0,0010                      | 0,0019                     | 0,0071                           | 0,0157         |
| 147 | JAWA TENGAH         | (114) KAB. KEBUMEN            | 0,0016            | 0,0016 | 0,0051 | 0,0083                          | 0,0042                    | 0,0010                      | 0,0019                     | 0,0071                           | 0,0154         |
| 148 | NUSA TENGGARA BARAT | (138) KAB. LOMBOK BARAT       | 0,0030            | 0,0016 | 0,0008 | 0,0054                          | 0,0042                    | 0,0010                      | 0,0043                     | 0,0095                           | 0,0149         |
| 149 | NUSA TENGGARA TIMUR | (120) KAB. SUMBA BARAT        | 0,0016            | 0,0030 | 0,0008 | 0,0054                          | 0,0076                    | 0,0010                      | 0,0008                     | 0,0094                           | 0,0148         |
| 150 | JAWA BARAT          | (89) KAB. CIREBON             | 0,0030            | 0,0016 | 0,0014 | 0,0060                          | 0,0042                    | 0,0023                      | 0,0019                     | 0,0084                           | 0,0144         |
| 151 | NUSA TENGGARA TIMUR | (148) KAB. FLORES TIMUR       | 0,0016            | 0,0016 | 0,0014 | 0,0046                          | 0,0042                    | 0,0010                      | 0,0043                     | 0,0095                           | 0,0141         |
| 152 | JAWA TIMUR          | (146) KAB. PAMEKASAN          | 0,0016            | 0,0016 | 0,0008 | 0,0040                          | 0,0076                    | 0,0010                      | 0,0008                     | 0,0094                           | 0,0134         |
| 153 | JAWA BARAT          | (71) KAB. GARUT               | 0,0030            | 0,0016 | 0,0014 | 0,0060                          | 0,0042                    | 0,0010                      | 0,0019                     | 0,0071                           | 0,0131         |
| 154 | JAWA TIMUR          | (147) KAB. PONOROGO           | 0,0016            | 0,0016 | 0,0014 | 0,0046                          | 0,0042                    | 0,0023                      | 0,0019                     | 0,0084                           | 0,0130         |
| 155 | NUSA TENGGARA BARAT | (141) KAB. BIMA               | 0,0030            | 0,0016 | 0,0008 | 0,0054                          | 0,0042                    | 0,0010                      | 0,0019                     | 0,0071                           | 0,0125         |
| 156 | JAWA TENGAH         | (41) KAB. TEGAL               | 0,0016            | 0,0030 | 0,0014 | 0,0060                          | 0,0016                    | 0,0023                      | 0,0019                     | 0,0058                           | 0,0118         |

**Lampiran 4.6.1.4. Hasil Pembobotan (Score) Indikator, Variabel, Faktor Tenaga Kerja & Produktivitas 156 Kabupaten di Indonesia**

| NO. | PROPINSI          | KABUPATEN                        | TENAGA KERJA & PRODUKTIVITAS |        |               |                                     |                    |                 |                              |                | TOTAL SCORE |
|-----|-------------------|----------------------------------|------------------------------|--------|---------------|-------------------------------------|--------------------|-----------------|------------------------------|----------------|-------------|
|     |                   |                                  | Ketersediaan Tenaga Kerja    |        |               |                                     | Biaya Tenaga Kerja |                 |                              |                |             |
|     |                   |                                  | Usia Produktif               | SLTP   | Pencari Kerja | Sub Total Ketersediaan Tenaga Kerja | UMP/ IHK           | Upah Aktual/IHK | Sub Total Biaya Tenaga Kerja | Produk-tivitas |             |
|     |                   |                                  |                              |        |               |                                     |                    |                 |                              |                |             |
| 1   | SUMATERA BARAT    | (35) KAB. PESISIR SELATAN        | 0,0015                       | 0,0027 | 0,0113        | 0,0155                              | 0,0060             | 0,0088          | 0,0148                       | 0,0273         | 0,0576      |
| 2   | SULAWESI SELATAN  | (21) KAB. PANGKAJENE & KEPULAUAN | 0,0019                       | 0,0027 | 0,0113        | 0,0159                              | 0,0060             | 0,0014          | 0,0074                       | 0,0273         | 0,0506      |
| 3   | JAWA BARAT        | (32) KAB. BEKASI                 | 0,0019                       | 0,0027 | 0,0068        | 0,0114                              | 0,0015             | 0,0088          | 0,0103                       | 0,0273         | 0,0490      |
| 4   | SULAWESI TENGGARA | (33) KAB. KOLAKA                 | 0,0015                       | 0,0027 | 0,0015        | 0,0057                              | 0,0060             | 0,0088          | 0,0148                       | 0,0273         | 0,0478      |
| 5   | KALIMANTAN BARAT  | (74) KAB. SANGGAU                | 0,0019                       | 0,0004 | 0,0031        | 0,0054                              | 0,0060             | 0,0088          | 0,0148                       | 0,0273         | 0,0475      |
| 6   | SUMATERA BARAT    | (49) KAB. SOLOK                  | 0,0006                       | 0,0027 | 0,0015        | 0,0048                              | 0,0060             | 0,0088          | 0,0148                       | 0,0273         | 0,0469      |
| 7   | KALIMANTAN TIMUR  | (3) KAB. BULUNGAN                | 0,0025                       | 0,0027 | 0,0031        | 0,0083                              | 0,0015             | 0,0088          | 0,0103                       | 0,0273         | 0,0459      |
| 8   | SUMATERA UTARA    | (38) KAB. LABUHAN BATU           | 0,0006                       | 0,0027 | 0,0031        | 0,0064                              | 0,0015             | 0,0088          | 0,0103                       | 0,0273         | 0,0440      |
| 9   | BANGKA BELITUNG   | (61) KAB. BANGKA                 | 0,0006                       | 0,0004 | 0,0008        | 0,0018                              | 0,0060             | 0,0088          | 0,0148                       | 0,0273         | 0,0439      |
| 10  | SULAWESI SELATAN  | (36) KAB. MAROS                  | 0,0019                       | 0,0027 | 0,0031        | 0,0077                              | 0,0060             | 0,0020          | 0,0080                       | 0,0273         | 0,0430      |
| 11  | SUMATERA SELATAN  | (40) KAB. LAHAT                  | 0,0006                       | 0,0009 | 0,0031        | 0,0046                              | 0,0060             | 0,0021          | 0,0081                       | 0,0273         | 0,0400      |
| 12  | JAWA TENGAH       | (51) KAB. CILACAP                | 0,0019                       | 0,0009 | 0,0031        | 0,0059                              | 0,0029             | 0,0020          | 0,0049                       | 0,0273         | 0,0381      |
| 13  | SUMATERA UTARA    | (44) KAB. ASAHAN                 | 0,0006                       | 0,0027 | 0,0031        | 0,0064                              | 0,0015             | 0,0020          | 0,0035                       | 0,0273         | 0,0372      |
| 14  | SULAWESI SELATAN  | (63) KAB. BARRU                  | 0,0019                       | 0,0027 | 0,0113        | 0,0159                              | 0,0060             | 0,0088          | 0,0148                       | 0,0028         | 0,0335      |
| 15  | SULAWESI SELATAN  | (19) KAB. GOWA                   | 0,0019                       | 0,0027 | 0,0113        | 0,0159                              | 0,0060             | 0,0088          | 0,0148                       | 0,0028         | 0,0335      |
| 16  | J A M B I         | (39) KAB. BATANGHARI             | 0,0019                       | 0,0027 | 0,0031        | 0,0077                              | 0,0029             | 0,0088          | 0,0117                       | 0,0140         | 0,0334      |
| 17  | PAPUA             | (46) KAB. SORONG                 | 0,0006                       | 0,0009 | 0,0015        | 0,0030                              | 0,0015             | 0,0014          | 0,0029                       | 0,0273         | 0,0332      |
| 18  | BANTEN            | (65) KAB. TANGERANG              | 0,0019                       | 0,0027 | 0,0113        | 0,0159                              | 0,0015             | 0,0088          | 0,0103                       | 0,0066         | 0,0328      |
| 19  | JAWA BARAT        | (105) KAB. BANDUNG               | 0,0019                       | 0,0027 | 0,0113        | 0,0159                              | 0,0015             | 0,0088          | 0,0103                       | 0,0066         | 0,0328      |
| 20  | SUMATERA UTARA    | (131) KAB. DELI SERDANG          | 0,0019                       | 0,0025 | 0,0113        | 0,0157                              | 0,0015             | 0,0088          | 0,0103                       | 0,0066         | 0,0326      |
| 21  | JAMBI             | (20) KAB. TANJUNG JABUNG TIMUR   | 0,0019                       | 0,0009 | 0,0113        | 0,0141                              | 0,0029             | 0,0088          | 0,0117                       | 0,0066         | 0,0324      |
| 22  | JAWA BARAT        | (86) KAB. KARAWANG               | 0,0025                       | 0,0009 | 0,0113        | 0,0147                              | 0,0015             | 0,0088          | 0,0103                       | 0,0066         | 0,0316      |
| 23  | SULAWESI SELATAN  | (80) KAB. BONE                   | 0,0019                       | 0,0004 | 0,0068        | 0,0091                              | 0,0060             | 0,0088          | 0,0148                       | 0,0066         | 0,0305      |
| 24  | R I A U           | (70) KAB. BENGKALIS              | 0,0034                       | 0,0027 | 0,0068        | 0,0129                              | 0,0060             | 0,0088          | 0,0148                       | 0,0028         | 0,0305      |
| 25  | BANGKA BELITUNG   | (27) KAB. BELITUNG               | 0,0025                       | 0,0027 | 0,0031        | 0,0083                              | 0,0060             | 0,0021          | 0,0081                       | 0,0140         | 0,0304      |
| 26  | SULAWESI SELATAN  | (107) KAB. TAKALAR               | 0,0015                       | 0,0027 | 0,0031        | 0,0073                              | 0,0060             | 0,0021          | 0,0081                       | 0,0140         | 0,0294      |

| NO. | PROPINSI           | KABUPATEN                      | TENAGA KERJA & PRODUKTIVITAS |        |               |                                     |                    |                 |                              |                | TOTAL SCORE |
|-----|--------------------|--------------------------------|------------------------------|--------|---------------|-------------------------------------|--------------------|-----------------|------------------------------|----------------|-------------|
|     |                    |                                | Ketersediaan Tenaga Kerja    |        |               |                                     | Biaya Tenaga Kerja |                 |                              |                |             |
|     |                    |                                | Usia Produktif               | SLTP   | Pencari Kerja | Sub Total Ketersediaan Tenaga Kerja | UMP/ IHK           | Upah Aktual/IHK | Sub Total Biaya Tenaga Kerja | Produk-tivitas |             |
|     |                    |                                |                              |        |               |                                     |                    |                 |                              |                |             |
|     |                    |                                |                              |        |               |                                     |                    |                 |                              |                | 0.1263      |
| 27  | KALIMANTAN BARAT   | (108) KAB. PONTIANAK           | 0,0019                       | 0,0027 | 0,0031        | 0,0077                              | 0,0060             | 0,0088          | 0,0148                       | 0,0066         | 0,0291      |
| 28  | SUMATERA UTARA     | (91) KAB. LANGKAT              | 0,0019                       | 0,0025 | 0,0113        | 0,0157                              | 0,0015             | 0,0088          | 0,0103                       | 0,0028         | 0,0288      |
| 29  | JAWA BARAT         | (100) KAB. BOGOR               | 0,0015                       | 0,0027 | 0,0113        | 0,0155                              | 0,0015             | 0,0088          | 0,0103                       | 0,0028         | 0,0286      |
| 30  | JAWA BARAT         | (89) KAB. CIREBON              | 0,0019                       | 0,0009 | 0,0113        | 0,0141                              | 0,0029             | 0,0088          | 0,0117                       | 0,0028         | 0,0286      |
| 31  | KALIMANTAN TENGAH  | (29) KAB. KAPUAS               | 0,0019                       | 0,0027 | 0,0015        | 0,0061                              | 0,0060             | 0,0088          | 0,0148                       | 0,0066         | 0,0275      |
| 32  | KALIMANTAN TENGAH  | (95) KAB. BARITO SELATAN       | 0,0019                       | 0,0025 | 0,0015        | 0,0059                              | 0,0060             | 0,0088          | 0,0148                       | 0,0066         | 0,0273      |
| 33  | BALI               | (34) KAB. BADUNG               | 0,0034                       | 0,0032 | 0,0031        | 0,0097                              | 0,0060             | 0,0088          | 0,0148                       | 0,0028         | 0,0273      |
| 34  | KALIMANTAN BARAT   | (113) KAB. KETAPANG            | 0,0019                       | 0,0009 | 0,0068        | 0,0096                              | 0,0060             | 0,0088          | 0,0148                       | 0,0028         | 0,0272      |
| 35  | BANTEN             | (47) KAB. LEBAK                | 0,0015                       | 0,0004 | 0,0068        | 0,0087                              | 0,0022             | 0,0020          | 0,0042                       | 0,0140         | 0,0269      |
| 36  | JAWA BARAT         | (12) KAB. INDRAMAYU            | 0,0019                       | 0,0004 | 0,0031        | 0,0054                              | 0,0060             | 0,0088          | 0,0148                       | 0,0066         | 0,0268      |
| 37  | SUMATERA UTARA     | (104) KAB. SIMALUNGUN          | 0,0006                       | 0,0025 | 0,0068        | 0,0099                              | 0,0015             | 0,0088          | 0,0103                       | 0,0066         | 0,0268      |
| 38  | JAWA TIMUR         | (55) KAB. SIDOARJO             | 0,0034                       | 0,0032 | 0,0031        | 0,0097                              | 0,0015             | 0,0088          | 0,0103                       | 0,0066         | 0,0266      |
| 39  | KALIMANTAN SELATAN | (112) KAB. HULU SUNGAI TENGAH  | 0,0019                       | 0,0027 | 0,0113        | 0,0159                              | 0,0060             | 0,0020          | 0,0080                       | 0,0019         | 0,0258      |
| 40  | RIAU               | (81) KAB. KUANTAN SENGGIGI     | 0,0019                       | 0,0027 | 0,0031        | 0,0077                              | 0,0060             | 0,0088          | 0,0148                       | 0,0028         | 0,0253      |
| 41  | SULAWESI SELATAN   | (25) KAB. TANA TORAJA          | 0,0019                       | 0,0027 | 0,0031        | 0,0077                              | 0,0060             | 0,0088          | 0,0148                       | 0,0028         | 0,0253      |
| 42  | BANTEN             | (94) KAB. SERANG               | 0,0006                       | 0,0009 | 0,0068        | 0,0083                              | 0,0015             | 0,0088          | 0,0103                       | 0,0066         | 0,0252      |
| 43  | JAWA BARAT         | (100) KAB. SUMEDANG            | 0,0034                       | 0,0027 | 0,0068        | 0,0129                              | 0,0015             | 0,0088          | 0,0103                       | 0,0019         | 0,0251      |
| 44  | KALIMANTAN SELATAN | (130) KAB. TANAH LAUT          | 0,0025                       | 0,0009 | 0,0031        | 0,0065                              | 0,0060             | 0,0088          | 0,0148                       | 0,0028         | 0,0241      |
| 45  | BALI               | (52) KAB. BULELENG             | 0,0019                       | 0,0027 | 0,0015        | 0,0061                              | 0,0060             | 0,0088          | 0,0148                       | 0,0028         | 0,0237      |
| 46  | BALI               | (21) KAB. TABANAN              | 0,0034                       | 0,0027 | 0,0008        | 0,0069                              | 0,0060             | 0,0088          | 0,0148                       | 0,0019         | 0,0236      |
| 47  | BALI               | (4) KAB. JEMBRANA              | 0,0025                       | 0,0027 | 0,0015        | 0,0067                              | 0,0060             | 0,0088          | 0,0148                       | 0,0019         | 0,0234      |
| 48  | SUMATERA BARAT     | (11) KAB. SAWAHLUNTO SIJUNJUNG | 0,0015                       | 0,0027 | 0,0015        | 0,0057                              | 0,0060             | 0,0088          | 0,0148                       | 0,0028         | 0,0233      |
| 49  | SUMATERA SELATAN   | (88) KAB. MUSI RAWAS           | 0,0015                       | 0,0009 | 0,0031        | 0,0055                              | 0,0060             | 0,0088          | 0,0148                       | 0,0028         | 0,0231      |
| 50  | SULAWESI TENGGARA  | (111) KAB. BUTON               | 0,0006                       | 0,0027 | 0,0031        | 0,0064                              | 0,0060             | 0,0088          | 0,0148                       | 0,0019         | 0,0231      |
| 51  | SULAWESI TENGAH    | (119) KAB. POSO                | 0,0025                       | 0,0027 | 0,0031        | 0,0083                              | 0,0060             | 0,0020          | 0,0080                       | 0,0066         | 0,0229      |
| 52  | LAMPUNG            | (64) KAB. WAY KANAN            | 0,0019                       | 0,0027 | 0,0008        | 0,0054                              | 0,0018             | 0,0088          | 0,0106                       | 0,0066         | 0,0226      |
| 53  | JAWA TIMUR         | (2) KAB. MAGETAN               | 0,0034                       | 0,0027 | 0,0031        | 0,0092                              | 0,0018             | 0,0088          | 0,0106                       | 0,0028         | 0,0226      |

| NO. | PROPINSI           | KABUPATEN                      | TENAGA KERJA & PRODUKTIVITAS |        |                  |                                              |                    |                    |                                       |                    | TOTAL<br>SCORE |
|-----|--------------------|--------------------------------|------------------------------|--------|------------------|----------------------------------------------|--------------------|--------------------|---------------------------------------|--------------------|----------------|
|     |                    |                                | Ketersediaan Tenaga Kerja    |        |                  |                                              | Biaya Tenaga Kerja |                    |                                       |                    |                |
|     |                    |                                | Usia<br>Produktif            | SLTP   | Pencari<br>Kerja | Sub Total<br>Ketersediaan<br>Tenaga<br>Kerja | UMP/<br>IHK        | Upah<br>Aktual/IHK | Sub Total<br>Biaya<br>Tenaga<br>Kerja | Produk-<br>tivitas |                |
|     |                    |                                |                              |        |                  |                                              |                    |                    |                                       |                    |                |
| 54  | KALIMANTAN SELATAN | (109) KAB. HULU SUNGAI SELATAN | 0,0019                       | 0,0009 | 0,0031           | 0,0059                                       | 0,0060             | 0,0088             | 0,0148                                | 0,0019             | 0,0226         |
| 55  | RIAU               | (42) KAB. ROKAN HULU           | 0,0025                       | 0,0009 | 0,0015           | 0,0049                                       | 0,0060             | 0,0088             | 0,0148                                | 0,0028             | 0,0225         |
| 56  | SUMATERA SELATAN   | (67) KAB. MUARA ENIM           | 0,0006                       | 0,0009 | 0,0031           | 0,0046                                       | 0,0060             | 0,0088             | 0,0148                                | 0,0028             | 0,0222         |
| 57  | KALIMANTAN BARAT   | (85) KAB. SAMBAS               | 0,0006                       | 0,0009 | 0,0031           | 0,0046                                       | 0,0060             | 0,0088             | 0,0148                                | 0,0028             | 0,0222         |
| 58  | SULAWESI UTARA     | (20) KAB. MINAHASA             | 0,0025                       | 0,0025 | 0,0031           | 0,0081                                       | 0,0022             | 0,0088             | 0,0110                                | 0,0028             | 0,0219         |
| 59  | SULAWESI SELATAN   | (28) KAB. LUWU UTARA           | 0,0015                       | 0,0027 | 0,0031           | 0,0073                                       | 0,0060             | 0,0020             | 0,0080                                | 0,0066             | 0,0219         |
| 60  | BALI               | (13) KAB. BANGLI               | 0,0034                       | 0,0009 | 0,0008           | 0,0051                                       | 0,0060             | 0,0088             | 0,0148                                | 0,0019             | 0,0218         |
| 61  | SULAWESI SELATAN   | (60) KAB. PINRANG              | 0,0019                       | 0,0027 | 0,0031           | 0,0077                                       | 0,0060             | 0,0014             | 0,0074                                | 0,0066             | 0,0217         |
| 62  | RIAU               | (22) KAB. PELALAWAN            | 0,0006                       | 0,0009 | 0,0031           | 0,0046                                       | 0,0060             | 0,0088             | 0,0148                                | 0,0019             | 0,0213         |
| 63  | LAMPUNG            | (10) KAB. LAMPUNG UTARA        | 0,0019                       | 0,0027 | 0,0031           | 0,0077                                       | 0,0018             | 0,0088             | 0,0106                                | 0,0028             | 0,0211         |
| 64  | KALIMANTAN TIMUR   | (82) KAB. KUTAI KERTANEGARA    | 0,0019                       | 0,0027 | 0,0068           | 0,0114                                       | 0,0015             | 0,0014             | 0,0029                                | 0,0066             | 0,0209         |
| 65  | KALIMANTAN BARAT   | (126) KAB. KAPUAS HULU         | 0,0019                       | 0,0027 | 0,0015           | 0,0061                                       | 0,0060             | 0,0020             | 0,0080                                | 0,0066             | 0,0207         |
| 66  | JAWA TIMUR         | (140) KAB. MOJOKERTO           | 0,0025                       | 0,0027 | 0,0015           | 0,0067                                       | 0,0022             | 0,0088             | 0,0110                                | 0,0028             | 0,0205         |
| 67  | JAWA TENGAH        | (92) KAB. KLATEN               | 0,0025                       | 0,0027 | 0,0015           | 0,0067                                       | 0,0029             | 0,0088             | 0,0117                                | 0,0019             | 0,0203         |
| 68  | SUMATERA UTARA     | (54) KAB. TAPANULI UTARA       | 0,0015                       | 0,0025 | 0,0031           | 0,0071                                       | 0,0015             | 0,0088             | 0,0103                                | 0,0028             | 0,0202         |
| 69  | GORONTALO          | (106) KAB. GORONTALO           | 0,0019                       | 0,0004 | 0,0068           | 0,0091                                       | 0,0060             | 0,0021             | 0,0081                                | 0,0028             | 0,0200         |
| 70  | BALI               | (48) KAB. KARANG ASEM          | 0,0019                       | 0,0004 | 0,0008           | 0,0031                                       | 0,0060             | 0,0088             | 0,0148                                | 0,0019             | 0,0198         |
| 71  | JAMBI              | (68) KAB. TEBO                 | 0,0019                       | 0,0027 | 0,0015           | 0,0061                                       | 0,0029             | 0,0088             | 0,0117                                | 0,0019             | 0,0197         |
| 72  | SULAWESI UTARA     | (16) KAB. SANGIHE              | 0,0019                       | 0,0009 | 0,0031           | 0,0059                                       | 0,0022             | 0,0088             | 0,0110                                | 0,0028             | 0,0197         |
| 73  | PAPUA              | (116) KAB. MIMIKA              | 0,0006                       | 0,0025 | 0,0113           | 0,0144                                       | 0,0015             | 0,0014             | 0,0029                                | 0,0019             | 0,0192         |
| 74  | LAMPUNG            | (142) KAB. LAMPUNG TIMUR       | 0,0019                       | 0,0027 | 0,0015           | 0,0061                                       | 0,0018             | 0,0088             | 0,0106                                | 0,0019             | 0,0186         |
| 75  | SULAWESI TENGAH    | (84) KAB. DONGGALA             | 0,0019                       | 0,0027 | 0,0031           | 0,0077                                       | 0,0060             | 0,0020             | 0,0080                                | 0,0028             | 0,0185         |
| 76  | JAWA TIMUR         | (58) KAB. GRESIK               | 0,0025                       | 0,0027 | 0,0031           | 0,0083                                       | 0,0015             | 0,0020             | 0,0035                                | 0,0066             | 0,0184         |
| 77  | JAWA BARAT         | (78) KAB. SUBANG               | 0,0034                       | 0,0009 | 0,0031           | 0,0074                                       | 0,0060             | 0,0021             | 0,0081                                | 0,0028             | 0,0183         |
| 78  | JAWA TENGAH        | (110) KAB. PEKALONGAN          | 0,0019                       | 0,0004 | 0,0015           | 0,0038                                       | 0,0029             | 0,0088             | 0,0117                                | 0,0028             | 0,0183         |
| 79  | SUMATERA BARAT     | (62) KAB. PASAMAN              | 0,0015                       | 0,0027 | 0,0031           | 0,0073                                       | 0,0060             | 0,0021             | 0,0081                                | 0,0028             | 0,0182         |
| 80  | JAWA TENGAH        | (87) KAB. KUDUS                | 0,0025                       | 0,0027 | 0,0015           | 0,0067                                       | 0,0029             | 0,0020             | 0,0049                                | 0,0066             | 0,0182         |



| NO. | PROPINSI            | KABUPATEN                     | TENAGA KERJA & PRODUKTIVITAS |        |                  |                                              |                    |                    |                                       |                    | TOTAL<br>SCORE |
|-----|---------------------|-------------------------------|------------------------------|--------|------------------|----------------------------------------------|--------------------|--------------------|---------------------------------------|--------------------|----------------|
|     |                     |                               | Ketersediaan Tenaga Kerja    |        |                  |                                              | Biaya Tenaga Kerja |                    |                                       |                    |                |
|     |                     |                               | Usia<br>Produktif            | SLTP   | Pencari<br>Kerja | Sub Total<br>Ketersediaan<br>Tenaga<br>Kerja | UMP/<br>IHK        | Upah<br>Aktual/IHK | Sub Total<br>Biaya<br>Tenaga<br>Kerja | Produk-<br>tivitas |                |
|     |                     |                               |                              |        |                  |                                              |                    |                    |                                       |                    |                |
| 81  | KALIMANTAN TENGAH   | (7) KAB. BARITO UTARA         | 0,0006                       | 0,0027 | 0,0008           | 0,0041                                       | 0,0060             | 0,0014             | 0,0074                                | 0,0066             | 0,0181         |
| 82  | SULAWESI SELATAN    | (6) KAB. ENREKANG             | 0,0019                       | 0,0027 | 0,0031           | 0,0077                                       | 0,0060             | 0,0014             | 0,0074                                | 0,0028             | 0,0179         |
| 83  | JAWA BARAT          | (1) KAB. PURWAKARTA           | 0,0019                       | 0,0027 | 0,0031           | 0,0077                                       | 0,0015             | 0,0020             | 0,0035                                | 0,0066             | 0,0178         |
| 84  | SUMATERA UTARA      | (97) KAB. TANAH KARO          | 0,0006                       | 0,0032 | 0,0008           | 0,0046                                       | 0,0015             | 0,0088             | 0,0103                                | 0,0028             | 0,0177         |
| 85  | JAWA TIMUR          | (98) KAB. JOMBANG             | 0,0019                       | 0,0027 | 0,0031           | 0,0077                                       | 0,0060             | 0,0020             | 0,0080                                | 0,0019             | 0,0176         |
| 86  | KALIMANTAN TIMUR    | (17) KAB. NUNUKAN             | 0,0019                       | 0,0027 | 0,0008           | 0,0054                                       | 0,0015             | 0,0088             | 0,0103                                | 0,0019             | 0,0176         |
| 87  | SULAWESI TENGAH     | (45) KAB. TOLI TOLI           | 0,0006                       | 0,0027 | 0,0031           | 0,0064                                       | 0,0060             | 0,0020             | 0,0080                                | 0,0028             | 0,0172         |
| 88  | KALIMANTAN TIMUR    | (81) KAB. BERAU               | 0,0019                       | 0,0027 | 0,0031           | 0,0077                                       | 0,0015             | 0,0014             | 0,0029                                | 0,0066             | 0,0172         |
| 89  | SULAWESI SELATAN    | (101) KAB. LUWU               | 0,0006                       | 0,0027 | 0,0031           | 0,0064                                       | 0,0060             | 0,0020             | 0,0080                                | 0,0028             | 0,0172         |
| 90  | SULAWESI SELATAN    | (69) KAB. SELAYAR             | 0,0025                       | 0,0004 | 0,0031           | 0,0060                                       | 0,0060             | 0,0021             | 0,0081                                | 0,0028             | 0,0169         |
| 91  | JAWA BARAT          | (124) KAB. SUKABUMI           | 0,0019                       | 0,0004 | 0,0068           | 0,0091                                       | 0,0029             | 0,0020             | 0,0049                                | 0,0028             | 0,0168         |
| 92  | BALI                | (30) KAB. GIANYAR             | 0,0034                       | 0,0027 | 0,0008           | 0,0069                                       | 0,0060             | 0,0020             | 0,0080                                | 0,0019             | 0,0168         |
| 93  | KALIMANTAN SELATAN  | (23) KAB. TABALONG            | 0,0025                       | 0,0027 | 0,0008           | 0,0060                                       | 0,0060             | 0,0020             | 0,0080                                | 0,0028             | 0,0168         |
| 94  | SULAWESI SELATAN    | (24) KAB. BANTAENG            | 0,0019                       | 0,0009 | 0,0031           | 0,0059                                       | 0,0060             | 0,0020             | 0,0080                                | 0,0028             | 0,0167         |
| 95  | SULAWESI TENGAH     | (10) KAB. BANGGAI             | 0,0015                       | 0,0027 | 0,0015           | 0,0057                                       | 0,0060             | 0,0020             | 0,0080                                | 0,0028             | 0,0165         |
| 96  | JAWA TENGAH         | (41) KAB. TEGAL               | 0,0015                       | 0,0004 | 0,0068           | 0,0087                                       | 0,0029             | 0,0020             | 0,0049                                | 0,0028             | 0,0164         |
| 97  | SUMATERA SELATAN    | (125) KAB. OGAN KOMERING ILIR | 0,0019                       | 0,0004 | 0,0031           | 0,0054                                       | 0,0060             | 0,0020             | 0,0080                                | 0,0028             | 0,0162         |
| 98  | JAWA TIMUR          | (83) KAB. KEDIRI              | 0,0019                       | 0,0027 | 0,0015           | 0,0061                                       | 0,0060             | 0,0020             | 0,0080                                | 0,0019             | 0,0160         |
| 99  | NUSA TENGGARA TIMUR | (26) KAB. BELU                | 0,0015                       | 0,0004 | 0,0015           | 0,0034                                       | 0,0018             | 0,0088             | 0,0106                                | 0,0019             | 0,0159         |
| 100 | JAWA TENGAH         | (96) KAB. KENDAL              | 0,0025                       | 0,0009 | 0,0008           | 0,0042                                       | 0,0029             | 0,0020             | 0,0049                                | 0,0066             | 0,0157         |
| 101 | JAWA TIMUR          | (135) KAB. PASURUAN           | 0,0034                       | 0,0009 | 0,0015           | 0,0058                                       | 0,0060             | 0,0020             | 0,0080                                | 0,0019             | 0,0157         |
| 102 | NUSA TENGGARA TIMUR | (15) KAB. ENDE                | 0,0006                       | 0,0009 | 0,0015           | 0,0030                                       | 0,0018             | 0,0088             | 0,0106                                | 0,0019             | 0,0155         |
| 103 | PAPUA               | (117) KAB. JAYAWIJAYA         | 0,0019                       | 0,0004 | 0,0008           | 0,0031                                       | 0,0015             | 0,0088             | 0,0103                                | 0,0019             | 0,0153         |
| 104 | JAWA BARAT          | (71) KAB. GARUT               | 0,0015                       | 0,0004 | 0,0068           | 0,0087                                       | 0,0018             | 0,0020             | 0,0038                                | 0,0028             | 0,0153         |
| 105 | R I A U             | (50) KAB. KAMPAR              | 0,0019                       | 0,0025 | 0,0015           | 0,0059                                       | 0,0060             | 0,0014             | 0,0074                                | 0,0019             | 0,0152         |
| 106 | JAWA TENGAH         | (136) KAB. BANYUMAS           | 0,0025                       | 0,0027 | 0,0031           | 0,0083                                       | 0,0029             | 0,0020             | 0,0049                                | 0,0019             | 0,0151         |
| 107 | JAWA BARAT          | (18) KAB. CIANJUR             | 0,0019                       | 0,0004 | 0,0068           | 0,0091                                       | 0,0018             | 0,0021             | 0,0039                                | 0,0019             | 0,0149         |

| NO. | PROPINSI            | KABUPATEN                   | TENAGA KERJA & PRODUKTIVITAS |        |                  |                                              |                    |                    |                                       |                    | TOTAL<br>SCORE |
|-----|---------------------|-----------------------------|------------------------------|--------|------------------|----------------------------------------------|--------------------|--------------------|---------------------------------------|--------------------|----------------|
|     |                     |                             | Ketersediaan Tenaga Kerja    |        |                  |                                              | Biaya Tenaga Kerja |                    |                                       |                    |                |
|     |                     |                             | Usia<br>Produktif            | SLTP   | Pencari<br>Kerja | Sub Total<br>Ketersediaan<br>Tenaga<br>Kerja | UMP/<br>IHK        | Upah<br>Aktual/IHK | Sub Total<br>Biaya<br>Tenaga<br>Kerja | Produk-<br>tivitas |                |
|     |                     |                             |                              |        |                  |                                              |                    |                    |                                       |                    |                |
| 108 | JAWA BARAT          | (5) KAB. KUNINGAN           | 0,0019                       | 0,0004 | 0,0068           | 0,0091                                       | 0,0018             | 0,0020             | 0,0038                                | 0,0019             | 0,0148         |
| 109 | NUSA TENGGARA TIMUR | (148) KAB. FLORES TIMUR     | 0,0006                       | 0,0009 | 0,0008           | 0,0023                                       | 0,0018             | 0,0088             | 0,0106                                | 0,0019             | 0,0148         |
| 110 | JAWA TENGAH         | (132) KAB. SUKOHARJO        | 0,0034                       | 0,0027 | 0,0008           | 0,0069                                       | 0,0029             | 0,0020             | 0,0049                                | 0,0028             | 0,0146         |
| 111 | SUMATERA SELATAN    | (76) KAB. MUSI BANYUASIN    | 0,0019                       | 0,0009 | 0,0008           | 0,0036                                       | 0,0060             | 0,0020             | 0,0080                                | 0,0028             | 0,0144         |
| 112 | D.I.YOGYAKRTA       | (143) KAB. BANTUL           | 0,0034                       | 0,0027 | 0,0015           | 0,0076                                       | 0,0029             | 0,0020             | 0,0049                                | 0,0019             | 0,0144         |
| 113 | KALIMANTAN SELATAN  | (125) KAB. TAPIN            | 0,0025                       | 0,0004 | 0,0015           | 0,0044                                       | 0,0060             | 0,0021             | 0,0081                                | 0,0019             | 0,0144         |
| 114 | NUSA TENGGARA TIMUR | (115) KAB. MANGGARAI        | 0,0006                       | 0,0004 | 0,0008           | 0,0018                                       | 0,0018             | 0,0088             | 0,0106                                | 0,0019             | 0,0143         |
| 115 | JAWA TIMUR          | (146) KAB. PAMEKASAN        | 0,0019                       | 0,0009 | 0,0015           | 0,0043                                       | 0,0060             | 0,0020             | 0,0080                                | 0,0019             | 0,0142         |
| 116 | SULAWESI TENGAH     | (99) KAB. MOROWALI          | 0,0015                       | 0,0004 | 0,0015           | 0,0034                                       | 0,0060             | 0,0020             | 0,0080                                | 0,0028             | 0,0142         |
| 117 | JAWA TIMUR          | (134) KAB. TULUNGAGUNG      | 0,0034                       | 0,0027 | 0,0015           | 0,0076                                       | 0,0018             | 0,0020             | 0,0038                                | 0,0028             | 0,0142         |
| 118 | R I A U             | (101) KAB. INDRAGIRI HILIR  | 0,0015                       | 0,0009 | 0,0015           | 0,0039                                       | 0,0060             | 0,0014             | 0,0074                                | 0,0028             | 0,0141         |
| 119 | NUSA TENGGARA BARAT | (141) KAB. BIMA             | 0,0015                       | 0,0027 | 0,0031           | 0,0073                                       | 0,0029             | 0,0020             | 0,0049                                | 0,0019             | 0,0141         |
| 120 | J A M B I           | (79) KAB. KERINCI           | 0,0019                       | 0,0027 | 0,0015           | 0,0061                                       | 0,0029             | 0,0020             | 0,0049                                | 0,0028             | 0,0138         |
| 121 | KALIMANTAN SELATAN  | (37) KAB. HULU SUNGAI UTARA | 0,0019                       | 0,0004 | 0,0015           | 0,0038                                       | 0,0060             | 0,0021             | 0,0081                                | 0,0019             | 0,0138         |
| 122 | SULAWESI SELATAN    | (14) KAB. SINJAI            | 0,0019                       | 0,0009 | 0,0008           | 0,0036                                       | 0,0060             | 0,0020             | 0,0080                                | 0,0019             | 0,0135         |
| 123 | JAWA TENGAH         | (122) KAB. MAGELANG         | 0,0025                       | 0,0027 | 0,0015           | 0,0067                                       | 0,0029             | 0,0020             | 0,0049                                | 0,0019             | 0,0135         |
| 124 | JAWA TIMUR          | (118) KAB. LAMONGAN         | 0,0034                       | 0,0027 | 0,0015           | 0,0076                                       | 0,0018             | 0,0020             | 0,0038                                | 0,0019             | 0,0133         |
| 125 | NUSA TENGGARA BARAT | (123) KAB. DOMPU            | 0,0006                       | 0,0027 | 0,0031           | 0,0064                                       | 0,0029             | 0,0021             | 0,0050                                | 0,0019             | 0,0133         |
| 126 | JAWA TIMUR          | (147) KAB. PONOROGO         | 0,0034                       | 0,0009 | 0,0031           | 0,0074                                       | 0,0018             | 0,0021             | 0,0039                                | 0,0019             | 0,0132         |
| 127 | SULAWESI SELATAN    | (72) KAB. MAJENE            | 0,0006                       | 0,0009 | 0,0008           | 0,0023                                       | 0,0060             | 0,0021             | 0,0081                                | 0,0028             | 0,0132         |
| 128 | SULAWESI SELATAN    | (8) KAB. JENEPONTO          | 0,0006                       | 0,0009 | 0,0015           | 0,0030                                       | 0,0060             | 0,0020             | 0,0080                                | 0,0019             | 0,0129         |
| 129 | JAWA TENGAH         | (75) KAB. BOYOLALI          | 0,0019                       | 0,0027 | 0,0015           | 0,0061                                       | 0,0029             | 0,0020             | 0,0049                                | 0,0019             | 0,0129         |
| 130 | J A M B I           | (90) KAB. BUNGO             | 0,0015                       | 0,0027 | 0,0008           | 0,0050                                       | 0,0029             | 0,0020             | 0,0049                                | 0,0028             | 0,0127         |
| 131 | LAMPUNG             | (59) KAB. LAMPUNG BARAT     | 0,0019                       | 0,0027 | 0,0015           | 0,0061                                       | 0,0018             | 0,0020             | 0,0038                                | 0,0028             | 0,0127         |
| 132 | JAWA TENGAH         | (102) KAB. KARANG ANYAR     | 0,0025                       | 0,0009 | 0,0015           | 0,0049                                       | 0,0029             | 0,0020             | 0,0049                                | 0,0028             | 0,0126         |
| 133 | JAWA TIMUR          | (144) KAB. JEMBER           | 0,0034                       | 0,0009 | 0,0015           | 0,0058                                       | 0,0029             | 0,0020             | 0,0049                                | 0,0019             | 0,0126         |
| 134 | LAMPUNG             | (145) KAB. LAMPUNG SELATAN  | 0,0019                       | 0,0009 | 0,0031           | 0,0059                                       | 0,0018             | 0,0020             | 0,0038                                | 0,0028             | 0,0125         |

| NO. | PROPINSI            | KABUPATEN                      | TENAGA KERJA & PRODUKTIVITAS |        |                  |                                              |                    |                    |                                       |                    | TOTAL<br>SCORE |
|-----|---------------------|--------------------------------|------------------------------|--------|------------------|----------------------------------------------|--------------------|--------------------|---------------------------------------|--------------------|----------------|
|     |                     |                                | Ketersediaan Tenaga Kerja    |        |                  |                                              | Biaya Tenaga Kerja |                    |                                       |                    |                |
|     |                     |                                | Usia<br>Produktif            | SLTP   | Pencari<br>Kerja | Sub Total<br>Ketersediaan<br>Tenaga<br>Kerja | UMP/<br>IHK        | Upah<br>Aktual/IHK | Sub Total<br>Biaya<br>Tenaga<br>Kerja | Produk-<br>tivitas |                |
|     |                     |                                |                              |        |                  |                                              |                    |                    |                                       |                    |                |
| 135 | NUSA TENGGARA BARAT | (93) KAB. LOMBOK TIMUR         | 0,0015                       | 0,0009 | 0,0031           | 0,0055                                       | 0,0029             | 0,0021             | 0,0050                                | 0,0019             | 0,0124         |
| 136 | JAWA BARAT          | (9) KAB. TASIKMALAYA           | 0,0025                       | 0,0009 | 0,0031           | 0,0065                                       | 0,0018             | 0,0020             | 0,0038                                | 0,0019             | 0,0122         |
| 137 | JAWA TENGAH         | (129) KAB. JEPARA              | 0,0019                       | 0,0027 | 0,0008           | 0,0054                                       | 0,0029             | 0,0020             | 0,0049                                | 0,0019             | 0,0122         |
| 138 | JAWA TIMUR          | (134) KAB. BANGKALAN           | 0,0019                       | 0,0004 | 0,0031           | 0,0054                                       | 0,0029             | 0,0020             | 0,0049                                | 0,0019             | 0,0122         |
| 139 | JAWA TENGAH         | (134) KAB. PEMALANG            | 0,0019                       | 0,0009 | 0,0015           | 0,0043                                       | 0,0029             | 0,0020             | 0,0049                                | 0,0028             | 0,0120         |
| 140 | D.I. YOGYAKARTA     | (121) KAB. GUNUNG KIDUL        | 0,0025                       | 0,0009 | 0,0008           | 0,0042                                       | 0,0029             | 0,0020             | 0,0049                                | 0,0028             | 0,0119         |
| 141 | PAPUA               | (137) KAB. FAKFAK              | 0,0015                       | 0,0032 | 0,0015           | 0,0062                                       | 0,0015             | 0,0014             | 0,0029                                | 0,0028             | 0,0119         |
| 142 | JAWA BARAT          | (57) KAB. CIAMIS               | 0,0025                       | 0,0004 | 0,0031           | 0,0060                                       | 0,0018             | 0,0021             | 0,0039                                | 0,0019             | 0,0118         |
| 143 | BENGKULU            | (127) KAB. BENGKULU SELATAN    | 0,0019                       | 0,0025 | 0,0015           | 0,0059                                       | 0,0018             | 0,0020             | 0,0038                                | 0,0019             | 0,0116         |
| 144 | JAWA TIMUR          | (133) KAB. BANYUWANGI          | 0,0034                       | 0,0009 | 0,0015           | 0,0058                                       | 0,0018             | 0,0021             | 0,0039                                | 0,0019             | 0,0116         |
| 145 | KALIMANTAN TIMUR    | (53) KAB. PASIR                | 0,0006                       | 0,0027 | 0,0015           | 0,0048                                       | 0,0015             | 0,0020             | 0,0035                                | 0,0028             | 0,0111         |
| 146 | KALIMANTAN TIMUR    | (66) KAB. KUTAI TIMUR          | 0,0019                       | 0,0032 | 0,0008           | 0,0059                                       | 0,0015             | 0,0014             | 0,0029                                | 0,0019             | 0,0107         |
| 147 | JAWA TIMUR          | (73) KAB. BLITAR               | 0,0019                       | 0,0009 | 0,0015           | 0,0043                                       | 0,0018             | 0,0021             | 0,0039                                | 0,0019             | 0,0101         |
| 148 | JAWA TENGAH         | (114) KAB. KEBUMEN             | 0,0019                       | 0,0009 | 0,0015           | 0,0043                                       | 0,0018             | 0,0020             | 0,0038                                | 0,0019             | 0,0100         |
| 149 | NUSA TENGGARA BARAT | (138) KAB. LOMBOK BARAT        | 0,0015                       | 0,0004 | 0,0008           | 0,0027                                       | 0,0029             | 0,0020             | 0,0049                                | 0,0019             | 0,0095         |
| 150 | SUMATERA UTARA      | (56) KAB. DAIRI                | 0,0006                       | 0,0025 | 0,0008           | 0,0039                                       | 0,0015             | 0,0021             | 0,0036                                | 0,0019             | 0,0094         |
| 151 | NUSA TENGGARA TIMUR | (43) KAB. TIMOR TENGAH SELATAN | 0,0019                       | 0,0004 | 0,0008           | 0,0031                                       | 0,0018             | 0,0014             | 0,0032                                | 0,0028             | 0,0091         |
| 152 | JAWA TIMUR          | (139) KAB. BONDOWOSO           | 0,0019                       | 0,0004 | 0,0008           | 0,0031                                       | 0,0018             | 0,0021             | 0,0039                                | 0,0019             | 0,0089         |
| 153 | NUSA TENGGARA TIMUR | (120) KAB. SUMBA BARAT         | 0,0006                       | 0,0004 | 0,0015           | 0,0025                                       | 0,0018             | 0,0021             | 0,0039                                | 0,0019             | 0,0083         |
| 154 | PAPUA               | (31) KAB. MANOKWARI            | 0,0006                       | 0,0009 | 0,0008           | 0,0023                                       | 0,0015             | 0,0014             | 0,0029                                | 0,0028             | 0,0080         |
| 155 | NUSA TENGGARA TIMUR | (75) KAB. TIMOR TENGAH UTARA   | 0,0006                       | 0,0004 | 0,0008           | 0,0018                                       | 0,0018             | 0,0021             | 0,0039                                | 0,0019             | 0,0076         |
| 156 | NUSA TENGGARA TIMUR | (128) KAB. NGADA               | 0,0006                       | 0,0004 | 0,0008           | 0,0018                                       | 0,0018             | 0,0020             | 0,0038                                | 0,0019             | 0,0075         |

**Lampiran 4.6.1.5. Hasil Pembobotan (Score) Indikator, Variabel, Faktor Infrastruktur Fisik 156 Kabupaten di Indonesia**

| NO. | PROPINSI         | KABUPATEN                      | INFRASTRUKTUR FISIK              |                |                 |         |         |                                        |                              |                |                 |         |         |                                   | TOTAL SCORE |
|-----|------------------|--------------------------------|----------------------------------|----------------|-----------------|---------|---------|----------------------------------------|------------------------------|----------------|-----------------|---------|---------|-----------------------------------|-------------|
|     |                  |                                | Ketersediaan Infrastruktur Fisik |                |                 |         |         |                                        | Kualitas Infrastruktur Fisik |                |                 |         |         |                                   |             |
|     |                  |                                | Jalan                            | Pelabuhan Laut | Pelabuhan Udara | Telepon | Listrik | Sub Total Keter-sediaan Infra-struktur | Jalan                        | Pelabuhan Laut | Pelabuhan Udara | Telepon | Listrik | Sub Total Kualitas Infra-struktur |             |
|     |                  |                                |                                  |                |                 |         |         |                                        |                              |                |                 |         |         |                                   |             |
| 1   | JAWA TIMUR       | (58) KAB. GRESIK               | 0,0040                           | 0,0051         | 0,0017          | 0,0071  | 0,0070  | 0,0249                                 | 0,0035                       | 0,0031         | 0,0022          | 0,0074  | 0,0052  | 0,0214                            | 0,0463      |
| 2   | JAWA BARAT       | (32) KAB. BEKASI               | 0,0040                           | 0,0051         | 0,0017          | 0,0071  | 0,0057  | 0,0236                                 | 0,0035                       | 0,0035         | 0,0026          | 0,0074  | 0,0052  | 0,0222                            | 0,0458      |
| 3   | BALI             | (30) KAB. GIANYAR              | 0,0066                           | 0,0038         | 0,0017          | 0,0044  | 0,0070  | 0,0235                                 | 0,0035                       | 0,0031         | 0,0026          | 0,0074  | 0,0052  | 0,0218                            | 0,0453      |
| 4   | JAWA TENGAH      | (41) KAB. TEGAL                | 0,0066                           | 0,0051         | 0,0006          | 0,0071  | 0,0057  | 0,0251                                 | 0,0035                       | 0,0014         | 0,0022          | 0,0074  | 0,0052  | 0,0197                            | 0,0448      |
| 5   | SULAWESI SELATAN | (19) KAB. GOWA                 | 0,0005                           | 0,0038         | 0,0017          | 0,0071  | 0,0070  | 0,0201                                 | 0,0035                       | 0,0031         | 0,0022          | 0,0074  | 0,0052  | 0,0214                            | 0,0415      |
| 6   | JAWA BARAT       | (18) KAB. CIANJUR              | 0,0040                           | 0,0033         | 0,0017          | 0,0071  | 0,0057  | 0,0218                                 | 0,0035                       | 0,0006         | 0,0026          | 0,0074  | 0,0052  | 0,0193                            | 0,0411      |
| 7   | SULAWESI SELATAN | (36) KAB. MAROS                | 0,0040                           | 0,0038         | 0,0017          | 0,0044  | 0,0057  | 0,0196                                 | 0,0035                       | 0,0031         | 0,0022          | 0,0074  | 0,0052  | 0,0214                            | 0,0410      |
| 8   | BANTEN           | (65) KAB. TANGERANG            | 0,0018                           | 0,0051         | 0,0017          | 0,0044  | 0,0057  | 0,0187                                 | 0,0035                       | 0,0035         | 0,0026          | 0,0074  | 0,0052  | 0,0222                            | 0,0409      |
| 9   | JAWA TIMUR       | (2) KAB. MAGETAN               | 0,0066                           | 0,0013         | 0,0006          | 0,0071  | 0,0070  | 0,0226                                 | 0,0018                       | 0,0006         | 0,0022          | 0,0074  | 0,0052  | 0,0172                            | 0,0398      |
| 10  | SULAWESI SELATAN | (8) KAB. JENEPONTO             | 0,0009                           | 0,0033         | 0,0017          | 0,0071  | 0,0070  | 0,0200                                 | 0,0035                       | 0,0014         | 0,0022          | 0,0074  | 0,0052  | 0,0197                            | 0,0397      |
| 11  | BALI             | (21) KAB. TABANAN              | 0,0040                           | 0,0033         | 0,0017          | 0,0031  | 0,0057  | 0,0178                                 | 0,0035                       | 0,0031         | 0,0026          | 0,0074  | 0,0052  | 0,0218                            | 0,0396      |
| 12  | JAWA BARAT       | (5) KAB. KUNINGAN              | 0,0040                           | 0,0033         | 0,0017          | 0,0071  | 0,0070  | 0,0231                                 | 0,0018                       | 0,0014         | 0,0007          | 0,0074  | 0,0052  | 0,0165                            | 0,0396      |
| 13  | JAWA BARAT       | (12) KAB. INDRAMAYU            | 0,0040                           | 0,0013         | 0,0006          | 0,0044  | 0,0070  | 0,0173                                 | 0,0035                       | 0,0035         | 0,0026          | 0,0074  | 0,0052  | 0,0222                            | 0,0395      |
| 14  | SULAWESI SELATAN | (14) KAB. SINJAI               | 0,0018                           | 0,0033         | 0,0017          | 0,0071  | 0,0057  | 0,0196                                 | 0,0035                       | 0,0014         | 0,0022          | 0,0074  | 0,0052  | 0,0197                            | 0,0393      |
| 15  | SULAWESI SELATAN | (24) KAB. BANTAENG             | 0,0009                           | 0,0033         | 0,0003          | 0,0071  | 0,0070  | 0,0186                                 | 0,0035                       | 0,0014         | 0,0022          | 0,0074  | 0,0052  | 0,0197                            | 0,0383      |
| 16  | SUMATERA BARAT   | (11) KAB. SAWAHLUNTO SIJUNJUNG | 0,0018                           | 0,0033         | 0,0017          | 0,0044  | 0,0070  | 0,0182                                 | 0,0035                       | 0,0014         | 0,0022          | 0,0074  | 0,0052  | 0,0197                            | 0,0379      |
| 17  | BALI             | (52) KAB. BULELENG             | 0,0018                           | 0,0033         | 0,0017          | 0,0044  | 0,0057  | 0,0169                                 | 0,0035                       | 0,0014         | 0,0026          | 0,0074  | 0,0052  | 0,0201                            | 0,0370      |
| 18  | JAWA TENGAH      | (110) KAB. PEKALONGAN          | 0,0040                           | 0,0033         | 0,0017          | 0,0031  | 0,0057  | 0,0178                                 | 0,0035                       | 0,0006         | 0,0022          | 0,0074  | 0,0052  | 0,0189                            | 0,0367      |
| 19  | JAWA BARAT       | (9) KAB. TASIKMALAYA           | 0,0018                           | 0,0013         | 0,0017          | 0,0071  | 0,0070  | 0,0189                                 | 0,0035                       | 0,0006         | 0,0007          | 0,0074  | 0,0052  | 0,0174                            | 0,0363      |
| 20  | JAWA TENGAH      | (92) KAB. KLATEN               | 0,0040                           | 0,0013         | 0,0017          | 0,0044  | 0,0057  | 0,0171                                 | 0,0035                       | 0,0006         | 0,0022          | 0,0074  | 0,0052  | 0,0189                            | 0,0360      |
| 21  | SUMATERA BARAT   | (49) KAB. SOLOK                | 0,0009                           | 0,0033         | 0,0017          | 0,0044  | 0,0057  | 0,0160                                 | 0,0035                       | 0,0014         | 0,0022          | 0,0074  | 0,0052  | 0,0197                            | 0,0357      |
| 22  | JAWA TENGAH      | (96) KAB. KENDAL               | 0,0040                           | 0,0038         | 0,0017          | 0,0031  | 0,0057  | 0,0183                                 | 0,0035                       | 0,0031         | 0,0022          | 0,0033  | 0,0052  | 0,0173                            | 0,0356      |
| 23  | SULAWESI SELATAN | (80) KAB. BONE                 | 0,0005                           | 0,0033         | 0,0017          | 0,0071  | 0,0057  | 0,0183                                 | 0,0006                       | 0,0014         | 0,0022          | 0,0074  | 0,0052  | 0,0168                            | 0,0351      |
| 24  | BANTEN           | (47) KAB. LEBAK                | 0,0018                           | 0,0033         | 0,0017          | 0,0044  | 0,0057  | 0,0169                                 | 0,0035                       | 0,0035         | 0,0026          | 0,0033  | 0,0052  | 0,0181                            | 0,0350      |
| 25  | SULAWESI SELATAN | (6) KAB. ENREKANG              | 0,0005                           | 0,0013         | 0,0017          | 0,0071  | 0,0070  | 0,0176                                 | 0,0018                       | 0,0006         | 0,0022          | 0,0074  | 0,0052  | 0,0172                            | 0,0348      |
| 26  | SULAWESI SELATAN | (60) KAB. PINRANG              | 0,0009                           | 0,0033         | 0,0006          | 0,0044  | 0,0057  | 0,0149                                 | 0,0035                       | 0,0014         | 0,0022          | 0,0074  | 0,0052  | 0,0197                            | 0,0346      |

| NO. | PROPINSI            | KABUPATEN                    | INFRASTRUKTUR FISIK              |                |                 |         |         |                                            |                              |                |                 |         |         |                                       | TOTAL<br>SCORE |
|-----|---------------------|------------------------------|----------------------------------|----------------|-----------------|---------|---------|--------------------------------------------|------------------------------|----------------|-----------------|---------|---------|---------------------------------------|----------------|
|     |                     |                              | Ketersediaan Infrastruktur Fisik |                |                 |         |         |                                            | Kualitas Infrastruktur Fisik |                |                 |         |         |                                       |                |
|     |                     |                              | Jalan                            | Pelabuhan Laut | Pelabuhan Udara | Telepon | Listrik | Sub Total Keter-sediaan Infra-<br>struktur | Jalan                        | Pelabuhan Laut | Pelabuhan Udara | Telepon | Listrik | Sub Total Kualitas Infra-<br>struktur |                |
|     |                     |                              |                                  |                |                 |         |         |                                            |                              |                |                 |         |         |                                       |                |
| 27  | JAWA BARAT          | (100) KAB. BOGOR             | 0,0040                           | 0,0033         | 0,0017          | 0,0044  | 0,0057  | 0,0191                                     | 0,0035                       | 0,0035         | 0,0026          | 0,0033  | 0,0022  | 0,0151                                | 0,0342         |
| 28  | JAWA BARAT          | (1) KAB. PURWAKARTA          | 0,0040                           | 0,0033         | 0,0017          | 0,0031  | 0,0057  | 0,0178                                     | 0,0018                       | 0,0035         | 0,0026          | 0,0033  | 0,0052  | 0,0164                                | 0,0342         |
| 29  | BALI                | (13) KAB. BANGLI             | 0,0009                           | 0,0038         | 0,0017          | 0,0031  | 0,0070  | 0,0165                                     | 0,0035                       | 0,0031         | 0,0026          | 0,0033  | 0,0052  | 0,0177                                | 0,0342         |
| 30  | SULAWESI TENGAH     | (10) KAB. BANGGAI            | 0,0005                           | 0,0033         | 0,0003          | 0,0071  | 0,0057  | 0,0169                                     | 0,0018                       | 0,0014         | 0,0015          | 0,0074  | 0,0052  | 0,0173                                | 0,0342         |
| 31  | BANTEN              | (94) KAB. SERANG             | 0,0018                           | 0,0051         | 0,0017          | 0,0031  | 0,0029  | 0,0146                                     | 0,0035                       | 0,0035         | 0,0026          | 0,0074  | 0,0022  | 0,0192                                | 0,0338         |
| 32  | SULAWESI UTARA      | (20) KAB. MINAHASA           | 0,0009                           | 0,0038         | 0,0017          | 0,0044  | 0,0057  | 0,0165                                     | 0,0018                       | 0,0031         | 0,0022          | 0,0074  | 0,0022  | 0,0167                                | 0,0332         |
| 33  | BALI                | (34) KAB. BADUNG             | 0,0066                           | 0,0038         | 0,0017          | 0,0031  | 0,0029  | 0,0181                                     | 0,0035                       | 0,0031         | 0,0026          | 0,0033  | 0,0022  | 0,0147                                | 0,0328         |
| 34  | JAWA BARAT          | (89) KAB. CIREBON            | 0,0040                           | 0,0038         | 0,0017          | 0,0031  | 0,0057  | 0,0183                                     | 0,0035                       | 0,0014         | 0,0007          | 0,0033  | 0,0052  | 0,0141                                | 0,0324         |
| 35  | JAWA BARAT          | (86) KAB. KARAWANG           | 0,0040                           | 0,0038         | 0,0017          | 0,0044  | 0,0029  | 0,0168                                     | 0,0035                       | 0,0035         | 0,0026          | 0,0033  | 0,0022  | 0,0151                                | 0,0319         |
| 36  | JAWA TIMUR          | (98) KAB. JOMBANG            | 0,0040                           | 0,0013         | 0,0017          | 0,0031  | 0,0057  | 0,0158                                     | 0,0035                       | 0,0014         | 0,0022          | 0,0033  | 0,0052  | 0,0156                                | 0,0314         |
| 37  | JAWA BARAT          | (71) KAB. GARUT              | 0,0018                           | 0,0013         | 0,0006          | 0,0044  | 0,0057  | 0,0138                                     | 0,0035                       | 0,0006         | 0,0007          | 0,0074  | 0,0052  | 0,0174                                | 0,0312         |
| 38  | BALI                | (48) KAB. KARANG ASEM        | 0,0009                           | 0,0038         | 0,0017          | 0,0031  | 0,0057  | 0,0152                                     | 0,0035                       | 0,0014         | 0,0026          | 0,0033  | 0,0052  | 0,0160                                | 0,0312         |
| 39  | BALI                | (4) KAB. JEMBRANA            | 0,0040                           | 0,0038         | 0,0017          | 0,0010  | 0,0057  | 0,0162                                     | 0,0035                       | 0,0031         | 0,0026          | 0,0033  | 0,0022  | 0,0147                                | 0,0309         |
| 40  | JAWA BARAT          | (100) KAB. SUMEDANG          | 0,0040                           | 0,0013         | 0,0006          | 0,0031  | 0,0057  | 0,0147                                     | 0,0018                       | 0,0006         | 0,0007          | 0,0074  | 0,0052  | 0,0157                                | 0,0304         |
| 41  | JAWA TIMUR          | (55) KAB. SIDOARJO           | 0,0040                           | 0,0038         | 0,0017          | 0,0031  | 0,0029  | 0,0155                                     | 0,0035                       | 0,0031         | 0,0022          | 0,0033  | 0,0022  | 0,0143                                | 0,0298         |
| 42  | SULAWESI SELATAN    | (72) KAB. MAJENE             | 0,0009                           | 0,0033         | 0,0006          | 0,0044  | 0,0057  | 0,0149                                     | 0,0035                       | 0,0006         | 0,0022          | 0,0033  | 0,0052  | 0,0148                                | 0,0297         |
| 43  | KALIMANTAN TENGAH   | (7) KAB. BARITO UTARA        | 0,0005                           | 0,0013         | 0,0003          | 0,0071  | 0,0057  | 0,0149                                     | 0,0006                       | 0,0006         | 0,0007          | 0,0074  | 0,0052  | 0,0145                                | 0,0294         |
| 44  | SUMATERA SELATAN    | (67) KAB. MUARA ENIM         | 0,0040                           | 0,0013         | 0,0017          | 0,0044  | 0,0029  | 0,0143                                     | 0,0018                       | 0,0014         | 0,0022          | 0,0074  | 0,0022  | 0,0150                                | 0,0293         |
| 45  | JAWA TENGAH         | (75) KAB. BOYOLALI           | 0,0040                           | 0,0013         | 0,0017          | 0,0031  | 0,0057  | 0,0158                                     | 0,0035                       | 0,0006         | 0,0022          | 0,0016  | 0,0052  | 0,0131                                | 0,0289         |
| 46  | SUMATERA UTARA      | (54) KAB. TAPANULI UTARA     | 0,0009                           | 0,0013         | 0,0006          | 0,0044  | 0,0057  | 0,0129                                     | 0,0003                       | 0,0006         | 0,0022          | 0,0074  | 0,0052  | 0,0157                                | 0,0286         |
| 47  | JAWA TENGAH         | (87) KAB. KUDUS              | 0,0040                           | 0,0033         | 0,0017          | 0,0031  | 0,0029  | 0,0150                                     | 0,0035                       | 0,0014         | 0,0022          | 0,0033  | 0,0022  | 0,0126                                | 0,0276         |
| 48  | SULAWESI UTARA      | (16) KAB. SANGIHE            | 0,0009                           | 0,0038         | 0,0006          | 0,0010  | 0,0057  | 0,0120                                     | 0,0035                       | 0,0031         | 0,0022          | 0,0016  | 0,0052  | 0,0156                                | 0,0276         |
| 49  | SULAWESI SELATAN    | (63) KAB. BARRU              | 0,0040                           | 0,0033         | 0,0017          | 0,0031  | 0,0029  | 0,0150                                     | 0,0035                       | 0,0014         | 0,0022          | 0,0033  | 0,0022  | 0,0126                                | 0,0276         |
| 50  | SUMATERA SELATAN    | (40) KAB. LAHAT              | 0,0009                           | 0,0006         | 0,0006          | 0,0071  | 0,0029  | 0,0121                                     | 0,0018                       | 0,0014         | 0,0022          | 0,0074  | 0,0022  | 0,0150                                | 0,0271         |
| 51  | JAWA TENGAH         | (136) KAB. BANYUMAS          | 0,0040                           | 0,0013         | 0,0006          | 0,0031  | 0,0029  | 0,0119                                     | 0,0035                       | 0,0006         | 0,0022          | 0,0033  | 0,0052  | 0,0148                                | 0,0267         |
| 52  | NUSA TENGGARA TIMUR | (75) KAB. TIMOR TENGAH UTARA | 0,0009                           | 0,0013         | 0,0006          | 0,0044  | 0,0029  | 0,0101                                     | 0,0018                       | 0,0006         | 0,0015          | 0,0074  | 0,0052  | 0,0165                                | 0,0266         |
| 53  | JAWA TENGAH         | (122) KAB. MAGELANG          | 0,0040                           | 0,0013         | 0,0017          | 0,0031  | 0,0057  | 0,0158                                     | 0,0035                       | 0,0006         | 0,0022          | 0,0016  | 0,0022  | 0,0101                                | 0,0259         |

| NO. | PROPINSI            | KABUPATEN                        | INFRASTRUKTUR FISIK              |                |                 |         |         |                                            |                              |                |                 |         |         |                                       | TOTAL<br>SCORE |
|-----|---------------------|----------------------------------|----------------------------------|----------------|-----------------|---------|---------|--------------------------------------------|------------------------------|----------------|-----------------|---------|---------|---------------------------------------|----------------|
|     |                     |                                  | Ketersediaan Infrastruktur Fisik |                |                 |         |         |                                            | Kualitas Infrastruktur Fisik |                |                 |         |         |                                       |                |
|     |                     |                                  | Jalan                            | Pelabuhan Laut | Pelabuhan Udara | Telepon | Listrik | Sub Total Keter-sediaan Infra-<br>struktur | Jalan                        | Pelabuhan Laut | Pelabuhan Udara | Telepon | Listrik | Sub Total Kualitas Infra-<br>struktur |                |
|     |                     |                                  |                                  |                |                 |         |         |                                            |                              |                |                 |         |         |                                       |                |
| 54  | JAWA TIMUR          | (118) KAB. LAMONGAN              | 0,0040                           | 0,0051         | 0,0017          | 0,0010  | 0,0029  | 0,0147                                     | 0,0035                       | 0,0014         | 0,0022          | 0,0016  | 0,0022  | 0,0109                                | 0,0256         |
| 55  | SULAWESI TENGGARA   | (33) KAB. KOLAKA                 | 0,0005                           | 0,0013         | 0,0017          | 0,0071  | 0,0029  | 0,0135                                     | 0,0006                       | 0,0006         | 0,0007          | 0,0074  | 0,0022  | 0,0115                                | 0,0250         |
| 56  | SUMATERA UTARA      | (131) KAB. DELI SERDANG          | 0,0009                           | 0,0033         | 0,0017          | 0,0031  | 0,0029  | 0,0119                                     | 0,0018                       | 0,0031         | 0,0022          | 0,0033  | 0,0022  | 0,0126                                | 0,0245         |
| 57  | SULAWESI SELATAN    | (107) KAB. TAKALAR               | 0,0009                           | 0,0033         | 0,0017          | 0,0031  | 0,0029  | 0,0119                                     | 0,0018                       | 0,0031         | 0,0022          | 0,0033  | 0,0022  | 0,0126                                | 0,0245         |
| 58  | JAWA TENGAH         | (114) KAB. KEBUMEN               | 0,0018                           | 0,0013         | 0,0006          | 0,0031  | 0,0057  | 0,0125                                     | 0,0035                       | 0,0006         | 0,0022          | 0,0033  | 0,0022  | 0,0118                                | 0,0243         |
| 59  | NUSA TENGGARA TIMUR | (15) KAB. ENDE                   | 0,0009                           | 0,0051         | 0,0017          | 0,0031  | 0,0011  | 0,0119                                     | 0,0006                       | 0,0014         | 0,0007          | 0,0074  | 0,0022  | 0,0123                                | 0,0242         |
| 60  | SULAWESI SELATAN    | (21) KAB. PANGKAJENE & KEPULAUAN | 0,0005                           | 0,0038         | 0,0006          | 0,0044  | 0,0029  | 0,0122                                     | 0,0035                       | 0,0006         | 0,0022          | 0,0033  | 0,0022  | 0,0118                                | 0,0240         |
| 61  | JAWA BARAT          | (57) KAB. CIAMIS                 | 0,0018                           | 0,0013         | 0,0006          | 0,0031  | 0,0029  | 0,0097                                     | 0,0035                       | 0,0014         | 0,0007          | 0,0033  | 0,0052  | 0,0141                                | 0,0238         |
| 62  | JAWA TENGAH         | (129) KAB. JEPARA                | 0,0040                           | 0,0033         | 0,0017          | 0,0010  | 0,0029  | 0,0129                                     | 0,0035                       | 0,0014         | 0,0022          | 0,0016  | 0,0022  | 0,0109                                | 0,0238         |
| 63  | JAWA BARAT          | (124) KAB. SUKABUMI              | 0,0040                           | 0,0033         | 0,0017          | 0,0031  | 0,0011  | 0,0132                                     | 0,0018                       | 0,0006         | 0,0026          | 0,0033  | 0,0022  | 0,0105                                | 0,0237         |
| 64  | JAWA TENGAH         | (51) KAB. CILACAP                | 0,0018                           | 0,0033         | 0,0017          | 0,0031  | 0,0029  | 0,0128                                     | 0,0018                       | 0,0014         | 0,0022          | 0,0033  | 0,0022  | 0,0109                                | 0,0237         |
| 65  | JAWA TIMUR          | (135) KAB. PASURUAN              | 0,0018                           | 0,0033         | 0,0017          | 0,0031  | 0,0029  | 0,0128                                     | 0,0018                       | 0,0014         | 0,0022          | 0,0033  | 0,0022  | 0,0109                                | 0,0237         |
| 66  | JAWA TENGAH         | (102) KAB. KARANG ANYAR          | 0,0040                           | 0,0013         | 0,0017          | 0,0031  | 0,0029  | 0,0130                                     | 0,0018                       | 0,0006         | 0,0022          | 0,0033  | 0,0022  | 0,0101                                | 0,0231         |
| 67  | JAWA TENGAH         | (132) KAB. SUKOHARJO             | 0,0040                           | 0,0033         | 0,0017          | 0,0010  | 0,0029  | 0,0129                                     | 0,0035                       | 0,0006         | 0,0022          | 0,0016  | 0,0022  | 0,0101                                | 0,0230         |
| 68  | NUSA TENGGARA BARAT | (138) KAB. LOMBOK BARAT          | 0,0018                           | 0,0038         | 0,0017          | 0,0031  | 0,0007  | 0,0111                                     | 0,0035                       | 0,0031         | 0,0015          | 0,0033  | 0,0004  | 0,0118                                | 0,0229         |
| 69  | KALIMANTAN TIMUR    | (82) KAB. KUTAI KERTANEGARA      | 0,0009                           | 0,0033         | 0,0017          | 0,0031  | 0,0029  | 0,0119                                     | 0,0018                       | 0,0014         | 0,0022          | 0,0033  | 0,0022  | 0,0109                                | 0,0228         |
| 70  | SUMATERA SELATAN    | (125) KAB. OGAN KOMERING ILIR    | 0,0009                           | 0,0033         | 0,0017          | 0,0044  | 0,0029  | 0,0132                                     | 0,0018                       | 0,0014         | 0,0022          | 0,0033  | 0,0008  | 0,0095                                | 0,0227         |
| 71  | KALIMANTAN SELATAN  | (130) KAB. TANAH LAUT            | 0,0009                           | 0,0038         | 0,0017          | 0,0031  | 0,0011  | 0,0106                                     | 0,0018                       | 0,0031         | 0,0015          | 0,0033  | 0,0022  | 0,0119                                | 0,0225         |
| 72  | KALIMANTAN TENGAH   | (29) KAB. KAPUAS                 | 0,0005                           | 0,0033         | 0,0006          | 0,0031  | 0,0029  | 0,0104                                     | 0,0003                       | 0,0014         | 0,0007          | 0,0074  | 0,0022  | 0,0120                                | 0,0224         |
| 73  | SULAWESI TENGAH     | (84) KAB. DONGGALA               | 0,0005                           | 0,0038         | 0,0017          | 0,0031  | 0,0011  | 0,0102                                     | 0,0018                       | 0,0031         | 0,0015          | 0,0033  | 0,0022  | 0,0119                                | 0,0221         |
| 74  | JAWA TIMUR          | (140) KAB. MOJOKERTO             | 0,0040                           | 0,0033         | 0,0017          | 0,0010  | 0,0029  | 0,0129                                     | 0,0018                       | 0,0014         | 0,0022          | 0,0016  | 0,0022  | 0,0092                                | 0,0221         |
| 75  | SUMATERA UTARA      | (97) KAB. TANAH KARO             | 0,0009                           | 0,0033         | 0,0017          | 0,0031  | 0,0029  | 0,0119                                     | 0,0018                       | 0,0006         | 0,0022          | 0,0033  | 0,0022  | 0,0101                                | 0,0220         |
| 76  | JAWA TIMUR          | (133) KAB. BANYUWANGI            | 0,0018                           | 0,0038         | 0,0006          | 0,0031  | 0,0029  | 0,0122                                     | 0,0006                       | 0,0014         | 0,0022          | 0,0033  | 0,0022  | 0,0097                                | 0,0219         |
| 77  | R I A U             | (70) KAB. BENGKALIS              | 0,0009                           | 0,0033         | 0,0017          | 0,0031  | 0,0011  | 0,0101                                     | 0,0006                       | 0,0031         | 0,0022          | 0,0033  | 0,0022  | 0,0114                                | 0,0215         |
| 78  | SULAWESI SELATAN    | (28) KAB. LUWU UTARA             | 0,0009                           | 0,0013         | 0,0006          | 0,0031  | 0,0011  | 0,0070                                     | 0,0035                       | 0,0031         | 0,0022          | 0,0033  | 0,0022  | 0,0143                                | 0,0213         |
| 79  | JAWA BARAT          | (78) KAB. SUBANG                 | 0,0040                           | 0,0033         | 0,0017          | 0,0031  | 0,0029  | 0,0150                                     | 0,0006                       | 0,0006         | 0,0026          | 0,0016  | 0,0008  | 0,0062                                | 0,0212         |
| 80  | NUSA TENGGARA TIMUR | (43) KAB. TIMOR TENGAH SELATAN   | 0,0009                           | 0,0013         | 0,0006          | 0,0031  | 0,0029  | 0,0088                                     | 0,0006                       | 0,0006         | 0,0015          | 0,0074  | 0,0022  | 0,0123                                | 0,0211         |

| NO. | PROPINSI            | KABUPATEN                      | INFRASTRUKTUR FISIK              |                   |                    |         |         |                                                      |                              |                   |                    |         |         |                                             | TOTAL<br>SCORE |
|-----|---------------------|--------------------------------|----------------------------------|-------------------|--------------------|---------|---------|------------------------------------------------------|------------------------------|-------------------|--------------------|---------|---------|---------------------------------------------|----------------|
|     |                     |                                | Ketersediaan Infrastruktur Fisik |                   |                    |         |         |                                                      | Kualitas Infrastruktur Fisik |                   |                    |         |         |                                             |                |
|     |                     |                                | Jalan                            | Pelabuhan<br>Laut | Pelabuhan<br>Udara | Telepon | Listrik | Sub Total<br>Keter-<br>sediaan<br>Infra-<br>struktur | Jalan                        | Pelabuhan<br>Laut | Pelabuhan<br>Udara | Telepon | Listrik | Sub Total<br>Kualitas<br>Infra-<br>struktur |                |
|     |                     |                                |                                  |                   |                    |         |         |                                                      |                              |                   |                    |         |         |                                             |                |
| 81  | LAMPUNG             | (10) KAB. LAMPUNG UTARA        | 0,0009                           | 0,0013            | 0,0017             | 0,0031  | 0,0029  | 0,0099                                               | 0,0035                       | 0,0031            | 0,0007             | 0,0016  | 0,0022  | 0,0111                                      | 0,0210         |
| 82  | SUMATERA UTARA      | (56) KAB. DAIRI                | 0,0009                           | 0,0033            | 0,0017             | 0,0031  | 0,0029  | 0,0119                                               | 0,0006                       | 0,0006            | 0,0022             | 0,0033  | 0,0022  | 0,0089                                      | 0,0208         |
| 83  | R I A U             | (50) KAB. KAMPAR               | 0,0018                           | 0,0038            | 0,0017             | 0,0005  | 0,0029  | 0,0107                                               | 0,0018                       | 0,0031            | 0,0022             | 0,0008  | 0,0022  | 0,0101                                      | 0,0208         |
| 84  | GORONTALO           | (106) KAB. GORONTALO           | 0,0009                           | 0,0038            | 0,0017             | 0,0031  | 0,0011  | 0,0106                                               | 0,0018                       | 0,0014            | 0,0015             | 0,0033  | 0,0022  | 0,0102                                      | 0,0208         |
| 85  | JAWA TIMUR          | (73) KAB. BLITAR               | 0,0018                           | 0,0013            | 0,0006             | 0,0005  | 0,0070  | 0,0112                                               | 0,0006                       | 0,0006            | 0,0022             | 0,0008  | 0,0052  | 0,0094                                      | 0,0206         |
| 86  | DIY                 | (143) KAB. BANTUL              | 0,0040                           | 0,0013            | 0,0017             | 0,0005  | 0,0029  | 0,0104                                               | 0,0035                       | 0,0006            | 0,0022             | 0,0016  | 0,0022  | 0,0101                                      | 0,0205         |
| 87  | NUSA TENGGARA TIMUR | (26) KAB. BELU                 | 0,0005                           | 0,0013            | 0,0003             | 0,0071  | 0,0007  | 0,0099                                               | 0,0006                       | 0,0006            | 0,0015             | 0,0074  | 0,0004  | 0,0105                                      | 0,0204         |
| 88  | JAWA TENGAH         | (134) KAB. PEMALANG            | 0,0040                           | 0,0013            | 0,0006             | 0,0005  | 0,0029  | 0,0093                                               | 0,0035                       | 0,0014            | 0,0022             | 0,0016  | 0,0022  | 0,0109                                      | 0,0202         |
| 89  | JAWA TIMUR          | (134) KAB. BANGKALAN           | 0,0009                           | 0,0033            | 0,0003             | 0,0031  | 0,0029  | 0,0105                                               | 0,0006                       | 0,0014            | 0,0022             | 0,0033  | 0,0022  | 0,0097                                      | 0,0202         |
| 90  | SULAWESI TENGAH     | (119) KAB. POSO                | 0,0009                           | 0,0038            | 0,0017             | 0,0031  | 0,0011  | 0,0106                                               | 0,0018                       | 0,0006            | 0,0015             | 0,0033  | 0,0022  | 0,0094                                      | 0,0200         |
| 91  | KALIMANTAN SELATAN  | (125) KAB. TAPIN               | 0,0005                           | 0,0033            | 0,0017             | 0,0031  | 0,0011  | 0,0097                                               | 0,0018                       | 0,0014            | 0,0015             | 0,0033  | 0,0022  | 0,0102                                      | 0,0199         |
| 92  | R I A U             | (101) KAB. INDRAGIRI HILIR     | 0,0018                           | 0,0038            | 0,0006             | 0,0031  | 0,0011  | 0,0104                                               | 0,0018                       | 0,0031            | 0,0022             | 0,0016  | 0,0004  | 0,0091                                      | 0,0195         |
| 93  | JAWA BARAT          | (105) KAB. BANDUNG             | 0,0040                           | 0,0013            | 0,0017             | 0,0010  | 0,0029  | 0,0109                                               | 0,0035                       | 0,0006            | 0,0007             | 0,0016  | 0,0022  | 0,0086                                      | 0,0195         |
| 94  | SULAWESI TENGGARA   | (111) KAB. BUTON               | 0,0009                           | 0,0038            | 0,0006             | 0,0031  | 0,0011  | 0,0095                                               | 0,0006                       | 0,0031            | 0,0007             | 0,0033  | 0,0022  | 0,0099                                      | 0,0194         |
| 95  | PAPUA               | (46) KAB. SORONG               | 0,0005                           | 0,0051            | 0,0017             | 0,0031  | 0,0007  | 0,0111                                               | 0,0006                       | 0,0031            | 0,0007             | 0,0033  | 0,0004  | 0,0081                                      | 0,0192         |
| 96  | BANGKA BELITUNG     | (27) KAB. BELITUNG             | 0,0009                           | 0,0038            | 0,0017             | 0,0031  | 0,0029  | 0,0124                                               | 0,0018                       | 0,0006            | 0,0007             | 0,0033  | 0,0004  | 0,0068                                      | 0,0192         |
| 97  | KALIMANTAN SELATAN  | (109) KAB. HULU SUNGAI SELATAN | 0,0005                           | 0,0033            | 0,0017             | 0,0031  | 0,0011  | 0,0097                                               | 0,0018                       | 0,0006            | 0,0015             | 0,0033  | 0,0022  | 0,0094                                      | 0,0191         |
| 98  | KALIMANTAN SELATAN  | (112) KAB. HULU SUNGAI TENGAH  | 0,0005                           | 0,0033            | 0,0017             | 0,0031  | 0,0011  | 0,0097                                               | 0,0018                       | 0,0006            | 0,0015             | 0,0033  | 0,0022  | 0,0094                                      | 0,0191         |
| 99  | J A M B I           | (90) KAB. BUNGO                | 0,0018                           | 0,0006            | 0,0003             | 0,0031  | 0,0029  | 0,0087                                               | 0,0018                       | 0,0014            | 0,0015             | 0,0033  | 0,0022  | 0,0102                                      | 0,0189         |
| 100 | KALIMANTAN SELATAN  | (37) KAB. HULU SUNGAI UTARA    | 0,0005                           | 0,0013            | 0,0017             | 0,0031  | 0,0029  | 0,0095                                               | 0,0018                       | 0,0006            | 0,0015             | 0,0033  | 0,0022  | 0,0094                                      | 0,0189         |
| 101 | SUMATERA BARAT      | (62) KAB. PASAMAN              | 0,0009                           | 0,0006            | 0,0003             | 0,0031  | 0,0029  | 0,0078                                               | 0,0018                       | 0,0014            | 0,0022             | 0,0033  | 0,0022  | 0,0109                                      | 0,0187         |
| 102 | JAWA TIMUR          | (144) KAB. JEMBER              | 0,0040                           | 0,0013            | 0,0003             | 0,0010  | 0,0029  | 0,0095                                               | 0,0018                       | 0,0014            | 0,0022             | 0,0016  | 0,0022  | 0,0092                                      | 0,0187         |
| 103 | KALIMANTAN BARAT    | (108) KAB. PONTIANAK           | 0,0018                           | 0,0038            | 0,0017             | 0,0010  | 0,0011  | 0,0094                                               | 0,0003                       | 0,0031            | 0,0022             | 0,0033  | 0,0004  | 0,0093                                      | 0,0187         |
| 104 | JAWA TIMUR          | (147) KAB. PONOROGO            | 0,0040                           | 0,0013            | 0,0006             | 0,0010  | 0,0029  | 0,0098                                               | 0,0018                       | 0,0006            | 0,0022             | 0,0016  | 0,0022  | 0,0084                                      | 0,0182         |
| 105 | SULAWESI SELATAN    | (25) KAB. TANA TORAJA          | 0,0009                           | 0,0006            | 0,0006             | 0,0044  | 0,0029  | 0,0094                                               | 0,0018                       | 0,0006            | 0,0022             | 0,0033  | 0,0008  | 0,0087                                      | 0,0181         |
| 106 | KALIMANTAN BARAT    | (74) KAB. SANGGAU              | 0,0005                           | 0,0033            | 0,0003             | 0,0031  | 0,0011  | 0,0083                                               | 0,0006                       | 0,0014            | 0,0022             | 0,0033  | 0,0022  | 0,0097                                      | 0,0180         |
| 107 | PAPUA               | (116) KAB. MIMIKA              | 0,0005                           | 0,0033            | 0,0017             | 0,0031  | 0,0011  | 0,0097                                               | 0,0006                       | 0,0014            | 0,0007             | 0,0033  | 0,0022  | 0,0082                                      | 0,0179         |



| NO.    | PROPINSI            | KABUPATEN                   | INFRASTRUKTUR FISIK              |                   |                    |         |         |                                                      |                              |                   |                    |         |         |                                             | TOTAL<br>SCORE |
|--------|---------------------|-----------------------------|----------------------------------|-------------------|--------------------|---------|---------|------------------------------------------------------|------------------------------|-------------------|--------------------|---------|---------|---------------------------------------------|----------------|
|        |                     |                             | Ketersediaan Infrastruktur Fisik |                   |                    |         |         |                                                      | Kualitas Infrastruktur Fisik |                   |                    |         |         |                                             |                |
|        |                     |                             | Jalan                            | Pelabuhan<br>Laut | Pelabuhan<br>Udara | Telepon | Listrik | Sub Total<br>Keter-<br>sediaan<br>Infra-<br>struktur | Jalan                        | Pelabuhan<br>Laut | Pelabuhan<br>Udara | Telepon | Listrik | Sub Total<br>Kualitas<br>Infra-<br>struktur |                |
|        |                     |                             |                                  |                   |                    |         |         |                                                      |                              |                   |                    |         |         |                                             |                |
| 0.0138 | 0.0141              | 0.0058                      | 0.016                            | 0.0175            |                    | 0.0095  | 0.0089  | 0.0073                                               | 0.204                        | 0.0139            |                    |         |         |                                             |                |
| 108    | KALIMANTAN TIMUR    | (3) KAB. BULUNGAN           | 0,0009                           | 0,0038            | 0,0017             | 0,0031  | 0,0007  | 0,0102                                               | 0,0003                       | 0,0014            | 0,0022             | 0,0033  | 0,0004  | 0,0076                                      | 0,0178         |
| 109    | KALIMANTAN TIMUR    | (53) KAB. PASIR             | 0,0005                           | 0,0038            | 0,0017             | 0,0010  | 0,0007  | 0,0077                                               | 0,0006                       | 0,0031            | 0,0022             | 0,0033  | 0,0008  | 0,0100                                      | 0,0177         |
| 110    | KALIMANTAN BARAT    | (113) KAB. KETAPANG         | 0,0009                           | 0,0033            | 0,0003             | 0,0031  | 0,0011  | 0,0087                                               | 0,0003                       | 0,0006            | 0,0022             | 0,0033  | 0,0022  | 0,0086                                      | 0,0173         |
| 111    | JAWA TIMUR          | (83) KAB. KEDIRI            | 0,0040                           | 0,0013            | 0,0006             | 0,0010  | 0,0011  | 0,0080                                               | 0,0035                       | 0,0006            | 0,0022             | 0,0016  | 0,0008  | 0,0087                                      | 0,0167         |
| 112    | SUMATERA UTARA      | (44) KAB. ASAHAN            | 0,0009                           | 0,0033            | 0,0017             | 0,0031  | 0,0007  | 0,0097                                               | 0,0003                       | 0,0031            | 0,0022             | 0,0008  | 0,0004  | 0,0068                                      | 0,0165         |
| 113    | SULAWESI SELATAN    | (101) KAB. LUWU             | 0,0009                           | 0,0013            | 0,0006             | 0,0031  | 0,0011  | 0,0070                                               | 0,0018                       | 0,0014            | 0,0022             | 0,0033  | 0,0008  | 0,0095                                      | 0,0165         |
| 114    | NUSA TENGGARA BARAT | (93) KAB. LOMBOK TIMUR      | 0,0009                           | 0,0038            | 0,0017             | 0,0010  | 0,0007  | 0,0081                                               | 0,0018                       | 0,0031            | 0,0015             | 0,0016  | 0,0004  | 0,0084                                      | 0,0165         |
| 115    | JAWA TIMUR          | (134) KAB. TULUNGAGUNG      | 0,0040                           | 0,0006            | 0,0006             | 0,0005  | 0,0029  | 0,0086                                               | 0,0018                       | 0,0006            | 0,0022             | 0,0008  | 0,0022  | 0,0076                                      | 0,0162         |
| 116    | KALIMANTAN TIMUR    | (17) KAB. NUNUKAN           | 0,0005                           | 0,0033            | 0,0003             | 0,0031  | 0,0007  | 0,0079                                               | 0,0018                       | 0,0006            | 0,0022             | 0,0033  | 0,0004  | 0,0083                                      | 0,0162         |
| 117    | SUMATERA SELATAN    | (76) KAB. MUSI BANYUASIN    | 0,0009                           | 0,0033            | 0,0017             | 0,0010  | 0,0011  | 0,0080                                               | 0,0018                       | 0,0014            | 0,0022             | 0,0016  | 0,0008  | 0,0078                                      | 0,0158         |
| 118    | KALIMANTAN SELATAN  | (23) KAB. TABALONG          | 0,0005                           | 0,0013            | 0,0003             | 0,0031  | 0,0029  | 0,0081                                               | 0,0018                       | 0,0003            | 0,0015             | 0,0033  | 0,0008  | 0,0077                                      | 0,0158         |
| 119    | KALIMANTAN TENGAH   | (95) KAB. BARITO SELATAN    | 0,0005                           | 0,0033            | 0,0003             | 0,0031  | 0,0011  | 0,0083                                               | 0,0006                       | 0,0006            | 0,0007             | 0,0033  | 0,0022  | 0,0074                                      | 0,0157         |
| 120    | PAPUA               | (137) KAB. FAKFAK           | 0,0005                           | 0,0033            | 0,0006             | 0,0031  | 0,0011  | 0,0086                                               | 0,0006                       | 0,0006            | 0,0003             | 0,0033  | 0,0022  | 0,0070                                      | 0,0156         |
| 121    | DIY                 | (121) KAB. GUNUNG KIDUL     | 0,0018                           | 0,0013            | 0,0017             | 0,0005  | 0,0029  | 0,0082                                               | 0,0006                       | 0,0006            | 0,0022             | 0,0016  | 0,0022  | 0,0072                                      | 0,0154         |
| 122    | KALIMANTAN BARAT    | (126) KAB. KAPUAS HULU      | 0,0009                           | 0,0013            | 0,0003             | 0,0031  | 0,0011  | 0,0067                                               | 0,0003                       | 0,0006            | 0,0022             | 0,0033  | 0,0022  | 0,0086                                      | 0,0153         |
| 123    | JAWA TIMUR          | (139) KAB. BONDOWOSO        | 0,0018                           | 0,0013            | 0,0003             | 0,0005  | 0,0029  | 0,0068                                               | 0,0018                       | 0,0014            | 0,0022             | 0,0008  | 0,0022  | 0,0084                                      | 0,0152         |
| 124    | RIAU                | (22) KAB. PELALAWAN         | 0,0009                           | 0,0038            | 0,0017             | 0,0005  | 0,0007  | 0,0076                                               | 0,0006                       | 0,0031            | 0,0022             | 0,0008  | 0,0008  | 0,0075                                      | 0,0151         |
| 125    | J A M B I           | (79) KAB. KERINCI           | 0,0009                           | 0,0006            | 0,0003             | 0,0031  | 0,0029  | 0,0078                                               | 0,0018                       | 0,0014            | 0,0015             | 0,0016  | 0,0008  | 0,0071                                      | 0,0149         |
| 126    | LAMPUNG             | (145) KAB. LAMPUNG SELATAN  | 0,0009                           | 0,0038            | 0,0017             | 0,0005  | 0,0011  | 0,0080                                               | 0,0018                       | 0,0031            | 0,0007             | 0,0008  | 0,0004  | 0,0068                                      | 0,0148         |
| 127    | SUMATERA UTARA      | (104) KAB. SIMALUNGUN       | 0,0009                           | 0,0033            | 0,0017             | 0,0031  | 0,0007  | 0,0097                                               | 0,0003                       | 0,0014            | 0,0022             | 0,0008  | 0,0004  | 0,0051                                      | 0,0148         |
| 128    | BENGKULU            | (127) KAB. BENGKULU SELATAN | 0,0009                           | 0,0033            | 0,0017             | 0,0010  | 0,0007  | 0,0076                                               | 0,0035                       | 0,0006            | 0,0015             | 0,0008  | 0,0004  | 0,0068                                      | 0,0144         |
| 129    | SUMATERA UTARA      | (38) KAB. LABUHAN BATU      | 0,0009                           | 0,0013            | 0,0003             | 0,0010  | 0,0029  | 0,0064                                               | 0,0006                       | 0,0014            | 0,0022             | 0,0016  | 0,0022  | 0,0080                                      | 0,0144         |
| 130    | J A M B I           | (39) KAB. BATANGHARI        | 0,0009                           | 0,0033            | 0,0017             | 0,0005  | 0,0029  | 0,0093                                               | 0,0006                       | 0,0014            | 0,0015             | 0,0008  | 0,0008  | 0,0051                                      | 0,0144         |
| 131    | JAWA TIMUR          | (146) KAB. PAMEKASAN        | 0,0018                           | 0,0013            | 0,0003             | 0,0005  | 0,0029  | 0,0068                                               | 0,0006                       | 0,0014            | 0,0022             | 0,0008  | 0,0022  | 0,0072                                      | 0,0140         |
| 132    | SUMATERA UTARA      | (91) KAB. LANGKAT           | 0,0009                           | 0,0033            | 0,0017             | 0,0031  | 0,0007  | 0,0097                                               | 0,0003                       | 0,0006            | 0,0022             | 0,0008  | 0,0004  | 0,0043                                      | 0,0140         |
| 133    | LAMPUNG             | (64) KAB. WAY KANAN         | 0,0009                           | 0,0006            | 0,0003             | 0,0010  | 0,0029  | 0,0057                                               | 0,0006                       | 0,0031            | 0,0007             | 0,0016  | 0,0022  | 0,0082                                      | 0,0139         |
| 134    | PAPUA               | (117) KAB. JAYAWIJAYA       | 0,0005                           | 0,0013            | 0,0006             | 0,0031  | 0,0011  | 0,0066                                               | 0,0006                       | 0,0006            | 0,0003             | 0,0033  | 0,0022  | 0,0070                                      | 0,0136         |



| NO.    | PROPINSI            | KABUPATEN                      | INFRASTRUKTUR FISIK              |                   |                    |         |         |                                                      |                              |                   |                    |         |         |                                             | TOTAL<br>SCORE |
|--------|---------------------|--------------------------------|----------------------------------|-------------------|--------------------|---------|---------|------------------------------------------------------|------------------------------|-------------------|--------------------|---------|---------|---------------------------------------------|----------------|
|        |                     |                                | Ketersediaan Infrastruktur Fisik |                   |                    |         |         |                                                      | Kualitas Infrastruktur Fisik |                   |                    |         |         |                                             |                |
|        |                     |                                | Jalan                            | Pelabuhan<br>Laut | Pelabuhan<br>Udara | Telepon | Listrik | Sub Total<br>Keter-<br>sediaan<br>Infra-<br>struktur | Jalan                        | Pelabuhan<br>Laut | Pelabuhan<br>Udara | Telepon | Listrik | Sub Total<br>Kualitas<br>Infra-<br>struktur |                |
|        |                     |                                |                                  |                   |                    |         |         |                                                      |                              |                   |                    |         |         |                                             |                |
| 0.0138 | 0.0141              | 0.0058                         | 0.016                            | 0.0175            |                    | 0.0095  | 0.0089  | 0.0073                                               | 0.204                        | 0.0139            |                    |         |         |                                             |                |
| 135    | RIAU                | (42) KAB. ROKAN HULU           | 0,0009                           | 0,0006            | 0,0003             | 0,0031  | 0,0007  | 0,0056                                               | 0,0006                       | 0,0031            | 0,0022             | 0,0016  | 0,0004  | 0,0079                                      | 0,0135         |
| 136    | SUMATERA BARAT      | (35) KAB. PESISIR SELATAN      | 0,0009                           | 0,0013            | 0,0017             | 0,0005  | 0,0007  | 0,0051                                               | 0,0035                       | 0,0014            | 0,0022             | 0,0008  | 0,0004  | 0,0083                                      | 0,0134         |
| 137    | SULAWESI SELATAN    | (69) KAB. SELAYAR              | 0,0009                           | 0,0038            | 0,0003             | 0,0010  | 0,0007  | 0,0067                                               | 0,0018                       | 0,0006            | 0,0022             | 0,0016  | 0,0004  | 0,0066                                      | 0,0133         |
| 138    | SULAWESI TENGAH     | (99) KAB. MOROWALI             | 0,0005                           | 0,0038            | 0,0006             | 0,0005  | 0,0007  | 0,0061                                               | 0,0018                       | 0,0014            | 0,0015             | 0,0016  | 0,0008  | 0,0071                                      | 0,0132         |
| 139    | JAMBI               | (20) KAB. TANJUNG JABUNG TIMUR | 0,0005                           | 0,0033            | 0,0017             | 0,0005  | 0,0007  | 0,0067                                               | 0,0018                       | 0,0014            | 0,0015             | 0,0008  | 0,0004  | 0,0059                                      | 0,0126         |
| 140    | NUSA TENGGARA TIMUR | (120) KAB. SUMBA BARAT         | 0,0009                           | 0,0033            | 0,0017             | 0,0005  | 0,0011  | 0,0075                                               | 0,0006                       | 0,0014            | 0,0007             | 0,0016  | 0,0008  | 0,0051                                      | 0,0126         |
| 141    | RIAU                | (81) KAB. KUANTAN SENGGIGI     | 0,0009                           | 0,0006            | 0,0003             | 0,0005  | 0,0007  | 0,0030                                               | 0,0018                       | 0,0031            | 0,0022             | 0,0008  | 0,0008  | 0,0087                                      | 0,0117         |
| 142    | KALIMANTAN TIMUR    | (81) KAB. BERAU                | 0,0005                           | 0,0033            | 0,0003             | 0,0005  | 0,0007  | 0,0053                                               | 0,0006                       | 0,0014            | 0,0022             | 0,0016  | 0,0004  | 0,0062                                      | 0,0115         |
| 143    | NUSA TENGGARA TIMUR | (148) KAB. FLORES TIMUR        | 0,0009                           | 0,0038            | 0,0017             | 0,0005  | 0,0007  | 0,0076                                               | 0,0006                       | 0,0014            | 0,0007             | 0,0008  | 0,0004  | 0,0039                                      | 0,0115         |
| 144    | BANGKA BELITUNG     | (61) KAB. BANGKA               | 0,0009                           | 0,0033            | 0,0017             | 0,0005  | 0,0007  | 0,0071                                               | 0,0018                       | 0,0006            | 0,0007             | 0,0008  | 0,0004  | 0,0043                                      | 0,0114         |
| 145    | NUSA TENGGARA BARAT | (141) KAB. BIMA                | 0,0005                           | 0,0038            | 0,0017             | 0,0005  | 0,0007  | 0,0072                                               | 0,0006                       | 0,0014            | 0,0007             | 0,0008  | 0,0004  | 0,0039                                      | 0,0111         |
| 146    | NUSA TENGGARA BARAT | (123) KAB. DOMPU               | 0,0009                           | 0,0033            | 0,0017             | 0,0005  | 0,0007  | 0,0071                                               | 0,0006                       | 0,0014            | 0,0007             | 0,0008  | 0,0004  | 0,0039                                      | 0,0110         |
| 147    | JAMBI               | (68) KAB. TEBO                 | 0,0018                           | 0,0013            | 0,0006             | 0,0005  | 0,0007  | 0,0049                                               | 0,0018                       | 0,0014            | 0,0015             | 0,0008  | 0,0004  | 0,0059                                      | 0,0108         |
| 148    | SULAWESI TENGAH     | (45) KAB. TOLI TOLI            | 0,0009                           | 0,0033            | 0,0006             | 0,0005  | 0,0007  | 0,0060                                               | 0,0006                       | 0,0014            | 0,0015             | 0,0008  | 0,0004  | 0,0047                                      | 0,0107         |
| 149    | NUSA TENGGARA TIMUR | (115) KAB. MANGGARAI           | 0,0009                           | 0,0033            | 0,0017             | 0,0005  | 0,0007  | 0,0071                                               | 0,0003                       | 0,0014            | 0,0007             | 0,0008  | 0,0004  | 0,0036                                      | 0,0107         |
| 150    | KALIMANTAN BARAT    | (85) KAB. SAMBAS               | 0,0005                           | 0,0013            | 0,0003             | 0,0010  | 0,0007  | 0,0038                                               | 0,0003                       | 0,0006            | 0,0022             | 0,0033  | 0,0003  | 0,0067                                      | 0,0105         |
| 151    | LAMPUNG             | (142) KAB. LAMPUNG TIMUR       | 0,0009                           | 0,0006            | 0,0003             | 0,0005  | 0,0011  | 0,0034                                               | 0,0018                       | 0,0031            | 0,0007             | 0,0008  | 0,0004  | 0,0068                                      | 0,0102         |
| 152    | LAMPUNG             | (59) KAB. LAMPUNG BARAT        | 0,0009                           | 0,0006            | 0,0003             | 0,0005  | 0,0007  | 0,0030                                               | 0,0018                       | 0,0031            | 0,0007             | 0,0008  | 0,0004  | 0,0068                                      | 0,0098         |
| 153    | SUMATERA SELATAN    | (88) KAB. MUSI RAWAS           | 0,0009                           | 0,0006            | 0,0003             | 0,0005  | 0,0007  | 0,0030                                               | 0,0018                       | 0,0014            | 0,0022             | 0,0008  | 0,0004  | 0,0066                                      | 0,0096         |
| 154    | PAPUA               | (31) KAB. MANOKWARI            | 0,0005                           | 0,0033            | 0,0006             | 0,0005  | 0,0007  | 0,0056                                               | 0,0006                       | 0,0014            | 0,0003             | 0,0008  | 0,0004  | 0,0035                                      | 0,0091         |
| 155    | NUSA TENGGARA TIMUR | (128) KAB. NGADA               | 0,0009                           | 0,0033            | 0,0006             | 0,0005  | 0,0007  | 0,0060                                               | 0,0003                       | 0,0006            | 0,0007             | 0,0008  | 0,0004  | 0,0028                                      | 0,0088         |
| 156    | KALIMANTAN TIMUR    | (66) KAB. KUTAI TIMUR          | 0,0005                           | 0,0006            | 0,0003             | 0,0005  | 0,0007  | 0,0026                                               | 0,0006                       | 0,0006            | 0,0022             | 0,0008  | 0,0004  | 0,0046                                      | 0,0072         |

## Lampiran 4.6.2 Hasil Pembobotan (Score) Intensitas Indikator dengan Metode AHP 44 Kota di Indonesia

### Lampiran 4.6.2.1. Hasil Pembobotan (Score) Indikator, Variabel, Faktor Kelembagaan 44 Kota di Indonesia

| NO. | PROPINSI            | KOTA                  | KELEMBAGAAN          |                          |                              |                  |                  |             |                           |                       |                 |                       |                        |                           | TOTAL SCORE |
|-----|---------------------|-----------------------|----------------------|--------------------------|------------------------------|------------------|------------------|-------------|---------------------------|-----------------------|-----------------|-----------------------|------------------------|---------------------------|-------------|
|     |                     |                       | Aparatur & Pelayanan |                          |                              | Peraturan Daerah | Keuangan Daerah  |             |                           | Kepastian Hukum       |                 |                       |                        |                           |             |
|     |                     |                       | Birokrasi            | Penyalah-gunaan wewenang | Sub Total Aparat & Pelayanan |                  | Retribusi/ Pajak | Pemb./ APBD | Sub Total Keuangan Daerah | Konsistensi Peraturan | Penegakan Hukum | Pungli Luar Birokrasi | Eksekutif - Legislatif | Sub Total Kepastian Hukum |             |
|     |                     |                       |                      |                          |                              |                  |                  |             |                           |                       |                 |                       |                        |                           |             |
| 1   | JAWA TIMUR          | KOTA MOJOKERTO        | 0,0126               | 0,0120                   | 0,0246                       | 0,0147           | 0,0051           | 0,0023      | 0,0074                    | 0,0054                | 0,0151          | 0,0099                | 0,0030                 | 0,0334                    | 0,0801      |
| 2   | JAWA TENGAH         | KOTA TEGAL            | 0,0126               | 0,0030                   | 0,0156                       | 0,0217           | 0,0020           | 0,0037      | 0,0057                    | 0,0095                | 0,0151          | 0,0025                | 0,0030                 | 0,0301                    | 0,0731      |
| 3   | JAWA BARAT          | KOTA BANDUNG          | 0,0062               | 0,0030                   | 0,0092                       | 0,0217           | 0,0083           | 0,0023      | 0,0106                    | 0,0095                | 0,0151          | 0,0012                | 0,0030                 | 0,0288                    | 0,0703      |
| 4   | SUMATERA UTARA      | KOTA TEBING TINGGI    | 0,0126               | 0,0120                   | 0,0246                       | 0,0046           | 0,0083           | 0,0023      | 0,0106                    | 0,0095                | 0,0151          | 0,0025                | 0,0030                 | 0,0301                    | 0,0699      |
| 5   | BANTEN              | KOTA CILEGON          | 0,0126               | 0,0030                   | 0,0156                       | 0,0147           | 0,0132           | 0,0023      | 0,0155                    | 0,0054                | 0,0070          | 0,0025                | 0,0030                 | 0,0179                    | 0,0637      |
| 6   | SUMATERA UTARA      | KOTA PEMATANG SIANTAR | 0,0126               | 0,0061                   | 0,0187                       | 0,0147           | 0,0051           | 0,0023      | 0,0074                    | 0,0095                | 0,0070          | 0,0025                | 0,0015                 | 0,0205                    | 0,0613      |
| 7   | R I A U             | KOTA DUMAI            | 0,0031               | 0,0030                   | 0,0061                       | 0,0217           | 0,0083           | 0,0059      | 0,0142                    | 0,0054                | 0,0070          | 0,0025                | 0,0030                 | 0,0179                    | 0,0599      |
| 8   | SUMATERA BARAT      | KOTA SAWAH LUNTO      | 0,0062               | 0,0061                   | 0,0123                       | 0,0147           | 0,0031           | 0,0023      | 0,0054                    | 0,0054                | 0,0070          | 0,0099                | 0,0043                 | 0,0266                    | 0,0590      |
| 9   | R I A U             | KOTA BATAM            | 0,0062               | 0,0061                   | 0,0123                       | 0,0046           | 0,0083           | 0,0059      | 0,0142                    | 0,0054                | 0,0151          | 0,0025                | 0,0030                 | 0,0260                    | 0,0571      |
| 10  | JAWA TENGAH         | KOTA SEMARANG         | 0,0062               | 0,0008                   | 0,0070                       | 0,0217           | 0,0083           | 0,0059      | 0,0142                    | 0,0054                | 0,0034          | 0,0012                | 0,0030                 | 0,0130                    | 0,0559      |
| 11  | GORONTALO           | KOTA GORONTALO        | 0,0062               | 0,0030                   | 0,0092                       | 0,0217           | 0,0020           | 0,0023      | 0,0043                    | 0,0054                | 0,0070          | 0,0051                | 0,0030                 | 0,0205                    | 0,0557      |
| 12  | SUMATERA UTARA      | KOTA MEDAN            | 0,0062               | 0,0030                   | 0,0092                       | 0,0147           | 0,0083           | 0,0014      | 0,0097                    | 0,0095                | 0,0070          | 0,0025                | 0,0030                 | 0,0220                    | 0,0556      |
| 13  | DKI JAKARTA         | DKI JAKARTA           | 0,0062               | 0,0015                   | 0,0077                       | 0,0147           | 0,0132           | 0,0037      | 0,0169                    | 0,0054                | 0,0070          | 0,0006                | 0,0030                 | 0,0160                    | 0,0553      |
| 14  | NUSA TENGGARA TIMUR | KOTA KUPANG           | 0,0062               | 0,0061                   | 0,0123                       | 0,0147           | 0,0083           | 0,0009      | 0,0092                    | 0,0054                | 0,0070          | 0,0025                | 0,0030                 | 0,0179                    | 0,0541      |
| 15  | JAWA BARAT          | KOTA CIREBON          | 0,0126               | 0,0030                   | 0,0156                       | 0,0046           | 0,0051           | 0,0023      | 0,0074                    | 0,0054                | 0,0151          | 0,0025                | 0,0030                 | 0,0260                    | 0,0536      |
| 16  | D.I. YOGYAKARTA     | KOTA YOGYAKARTA       | 0,0062               | 0,0030                   | 0,0092                       | 0,0217           | 0,0083           | 0,0009      | 0,0092                    | 0,0054                | 0,0034          | 0,0012                | 0,0030                 | 0,0130                    | 0,0531      |
| 17  | SULAWESI SELATAN    | KOTA PARE-PARE        | 0,0126               | 0,0008                   | 0,0134                       | 0,0147           | 0,0020           | 0,0023      | 0,0043                    | 0,0054                | 0,0070          | 0,0025                | 0,0030                 | 0,0179                    | 0,0503      |
| 18  | JAWA TIMUR          | KOTA MALANG           | 0,0031               | 0,0015                   | 0,0046                       | 0,0217           | 0,0083           | 0,0014      | 0,0097                    | 0,0054                | 0,0018          | 0,0025                | 0,0043                 | 0,0140                    | 0,0500      |
| 19  | SUMATERA BARAT      | KOTA PADANG           | 0,0031               | 0,0008                   | 0,0039                       | 0,0147           | 0,0132           | 0,0009      | 0,0141                    | 0,0054                | 0,0018          | 0,0025                | 0,0072                 | 0,0169                    | 0,0496      |
| 20  | BALI                | KOTA DENPASAR         | 0,0031               | 0,0030                   | 0,0061                       | 0,0147           | 0,0083           | 0,0023      | 0,0106                    | 0,0054                | 0,0070          | 0,0025                | 0,0030                 | 0,0179                    | 0,0493      |
| 21  | R I A U             | KOTA PEKAN BARU       | 0,0062               | 0,0015                   | 0,0077                       | 0,0147           | 0,0083           | 0,0023      | 0,0106                    | 0,0054                | 0,0070          | 0,0006                | 0,0030                 | 0,0160                    | 0,0490      |
| 22  | JAWA TIMUR          | KOTA KEDIRI           | 0,0062               | 0,0030                   | 0,0092                       | 0,0046           | 0,0083           | 0,0014      | 0,0097                    | 0,0095                | 0,0034          | 0,0051                | 0,0072                 | 0,0252                    | 0,0487      |

| NO.    | PROPINSI            | KOTA                | KELEMBAGAAN          |                                 |                                    |                     |                     |                |                                 |                          |                    |                          |                           |                                 | TOTAL<br>SCORE |
|--------|---------------------|---------------------|----------------------|---------------------------------|------------------------------------|---------------------|---------------------|----------------|---------------------------------|--------------------------|--------------------|--------------------------|---------------------------|---------------------------------|----------------|
|        |                     |                     | Aparatur & Pelayanan |                                 |                                    | Peraturan<br>Daerah | Keuangan Daerah     |                |                                 | Kepastian Hukum          |                    |                          |                           |                                 |                |
|        |                     |                     | Birokrasi            | Penyalah-<br>gunaan<br>wewenang | Sub Total<br>Aparat &<br>Pelayanan |                     | Retribusi/<br>Pajak | Pemb./<br>APBD | Sub Total<br>Keuangan<br>Daerah | Konsistensi<br>Peraturan | Penegakan<br>Hukum | Pungli Luar<br>Birokrasi | Eksekutif -<br>Legislatif | Sub Total<br>Kepastian<br>Hukum |                |
|        |                     |                     |                      |                                 |                                    |                     |                     |                |                                 |                          |                    |                          |                           |                                 |                |
| 0.0483 | 0.0235              |                     | 0.0771               | 0.0316                          | 0.0141                             |                     | 0.035               | 0.0524         | 0.0194                          | 0.0167                   |                    |                          |                           |                                 |                |
| 23     | SULAWESI UTARA      | KOTA MANADO         | 0,0031               | 0,0008                          | 0,0039                             | 0,0147              | 0,0083              | 0,0014         | 0,0097                          | 0,0054                   | 0,0070             | 0,0006                   | 0,0072                    | 0,0202                          | 0,0485         |
| 24     | JAWA BARAT          | KOTA BOGOR          | 0,0062               | 0,0120                          | 0,0182                             | 0,0046              | 0,0083              | 0,0023         | 0,0106                          | 0,0024                   | 0,0070             | 0,0025                   | 0,0030                    | 0,0149                          | 0,0483         |
| 25     | BENGKULU            | KOTA BENGKULU       | 0,0062               | 0,0030                          | 0,0092                             | 0,0147              | 0,0051              | 0,0014         | 0,0065                          | 0,0024                   | 0,0070             | 0,0025                   | 0,0043                    | 0,0162                          | 0,0466         |
| 26     | LAMPUNG             | KOTA BANDAR LAMPUNG | 0,0031               | 0,0008                          | 0,0039                             | 0,0147              | 0,0083              | 0,0009         | 0,0092                          | 0,0024                   | 0,0070             | 0,0006                   | 0,0072                    | 0,0172                          | 0,0450         |
| 27     | BANTEN              | KOTA TANGERANG      | 0,0031               | 0,0008                          | 0,0039                             | 0,0147              | 0,0132              | 0,0037         | 0,0169                          | 0,0024                   | 0,0018             | 0,0006                   | 0,0030                    | 0,0078                          | 0,0433         |
| 28     | SUMATERA UTARA      | KOTA SIBOLGA        | 0,0016               | 0,0030                          | 0,0046                             | 0,0147              | 0,0020              | 0,0037         | 0,0057                          | 0,0012                   | 0,0018             | 0,0099                   | 0,0030                    | 0,0159                          | 0,0409         |
| 29     | JAWA TIMUR          | KOTA PROBOLINGGO    | 0,0126               | 0,0015                          | 0,0141                             | 0,0046              | 0,0031              | 0,0023         | 0,0054                          | 0,0054                   | 0,0070             | 0,0012                   | 0,0030                    | 0,0166                          | 0,0407         |
| 30     | JAWA TENGAH         | KOTA PEKALONGAN     | 0,0031               | 0,0015                          | 0,0046                             | 0,0147              | 0,0083              | 0,0037         | 0,0120                          | 0,0024                   | 0,0034             | 0,0006                   | 0,0030                    | 0,0094                          | 0,0407         |
| 31     | KALIMANTAN TIMUR    | KOTA BALIKPAPAN     | 0,0062               | 0,0015                          | 0,0077                             | 0,0046              | 0,0083              | 0,0059         | 0,0142                          | 0,0024                   | 0,0070             | 0,0012                   | 0,0030                    | 0,0136                          | 0,0401         |
| 32     | JAWA TENGAH         | KOTA SURAKARTA      | 0,0031               | 0,0015                          | 0,0046                             | 0,0147              | 0,0083              | 0,0009         | 0,0092                          | 0,0024                   | 0,0034             | 0,0025                   | 0,0030                    | 0,0113                          | 0,0398         |
| 33     | JAWA BARAT          | KOTA SUKABUMI       | 0,0062               | 0,0015                          | 0,0077                             | 0,0147              | 0,0020              | 0,0023         | 0,0043                          | 0,0024                   | 0,0070             | 0,0006                   | 0,0030                    | 0,0130                          | 0,0397         |
| 34     | JAWA TIMUR          | KOTA SURABAYA       | 0,0062               | 0,0008                          | 0,0070                             | 0,0046              | 0,0083              | 0,0014         | 0,0097                          | 0,0054                   | 0,0070             | 0,0012                   | 0,0043                    | 0,0179                          | 0,0392         |
| 35     | SUMATERA SELATAN    | KOTA PALEMBANG      | 0,0016               | 0,0008                          | 0,0024                             | 0,0147              | 0,0083              | 0,0014         | 0,0097                          | 0,0012                   | 0,0018             | 0,0006                   | 0,0072                    | 0,0108                          | 0,0376         |
| 36     | SULAWESI TENGGARA   | KOTA KENDARI        | 0,0062               | 0,0015                          | 0,0077                             | 0,0046              | 0,0083              | 0,0014         | 0,0097                          | 0,0054                   | 0,0034             | 0,0012                   | 0,0043                    | 0,0143                          | 0,0363         |
| 37     | SUMATERA UTARA      | KOTA TANJUNG BALAI  | 0,0062               | 0,0015                          | 0,0077                             | 0,0046              | 0,0051              | 0,0059         | 0,0110                          | 0,0024                   | 0,0070             | 0,0006                   | 0,0030                    | 0,0130                          | 0,0363         |
| 38     | JAWA TIMUR          | KOTA MADIUN         | 0,0031               | 0,0030                          | 0,0061                             | 0,0046              | 0,0083              | 0,0059         | 0,0142                          | 0,0024                   | 0,0034             | 0,0025                   | 0,0030                    | 0,0113                          | 0,0362         |
| 39     | SUMATERA UTARA      | KOTA BINJAI         | 0,0016               | 0,0015                          | 0,0031                             | 0,0147              | 0,0051              | 0,0023         | 0,0074                          | 0,0012                   | 0,0034             | 0,0025                   | 0,0030                    | 0,0101                          | 0,0353         |
| 40     | KALIMANTAN TIMUR    | KOTA SAMARINDA      | 0,0016               | 0,0008                          | 0,0024                             | 0,0147              | 0,0051              | 0,0059         | 0,0110                          | 0,0012                   | 0,0018             | 0,0006                   | 0,0030                    | 0,0066                          | 0,0347         |
| 41     | SULAWESI UTARA      | KOTA BITUNG         | 0,0062               | 0,0015                          | 0,0077                             | 0,0046              | 0,0051              | 0,0023         | 0,0074                          | 0,0024                   | 0,0070             | 0,0006                   | 0,0030                    | 0,0130                          | 0,0327         |
| 42     | JAWA BARAT          | KOTA BEKASI         | 0,0016               | 0,0008                          | 0,0024                             | 0,0147              | 0,0051              | 0,0037         | 0,0088                          | 0,0012                   | 0,0018             | 0,0006                   | 0,0030                    | 0,0066                          | 0,0325         |
| 43     | BANGKA BELITUNG     | KOTA PANGKAL PINANG | 0,0062               | 0,0030                          | 0,0092                             | 0,0046              | 0,0031              | 0,0023         | 0,0054                          | 0,0012                   | 0,0034             | 0,0025                   | 0,0030                    | 0,0101                          | 0,0293         |
| 44     | NUSA TENGGARA BARAT | KOTA MATARAM        | 0,0031               | 0,0030                          | 0,0061                             | 0,0046              | 0,0083              | 0,0023         | 0,0106                          | 0,0012                   | 0,0018             | 0,0006                   | 0,0030                    | 0,0066                          | 0,0279         |

**Lampiran 4.6.2.2. Hasil Pembobotan (Score) Indikator, Variabel, Faktor Sosial Politik 44 Kota di Indonesia**

| NO.    | PROPINSI            | KOTA                | SOSIAL POLITIK |                     |                  |                    |                        |                    |                    |            |                          |         |                   |               |            |                  | TOTAL SCORE |
|--------|---------------------|---------------------|----------------|---------------------|------------------|--------------------|------------------------|--------------------|--------------------|------------|--------------------------|---------|-------------------|---------------|------------|------------------|-------------|
|        |                     |                     | Keamanan       |                     |                  |                    | Sosial Politik         |                    |                    |            |                          | Budaya  |                   |               |            |                  |             |
|        |                     |                     | Gangguan Usaha | Gangguan Masyarakat | Kecepatan Aparat | Sub Total Keamanan | Partisipasi Masyarakat | Konflik Masyarakat | Stabilitas Politik | Unjuk Rasa | Sub Total Sosial Politik | Terbuka | Non Diskriminatif | Adat-istiadat | Etos Kerja | Sub Total Budaya |             |
|        |                     |                     |                |                     |                  |                    |                        |                    |                    |            |                          |         |                   |               |            |                  |             |
| 0.0523 | 0.0311              | 0.0724              |                | 0.012               | 0.0184           | 0.0289             | 0.0095                 |                    | 0.0086             | 0.0064     | 0.0071                   | 0.0141  |                   |               |            |                  |             |
| 1      | SUMATERA BARAT      | KOTA SAWAH LUNTO    | 0,0254         | 0,0080              | 0,0214           | 0,0548             | 0,0030                 | 0,0095             | 0,0048             | 0,0049     | 0,0222                   | 0,0025  | 0,0018            | 0,0012        | 0,0005     | 0,0060           | 0,0830      |
| 2      | GORONTALO           | KOTA GORONTALO      | 0,0254         | 0,0080              | 0,0214           | 0,0548             | 0,0030                 | 0,0024             | 0,0116             | 0,0025     | 0,0195                   | 0,0025  | 0,0018            | 0,0005        | 0,0019     | 0,0067           | 0,0810      |
| 3      | R I A U             | KOTA BATAM          | 0,0153         | 0,0036              | 0,0214           | 0,0403             | 0,0023                 | 0,0095             | 0,0116             | 0,0025     | 0,0259                   | 0,0006  | 0,0009            | 0,0012        | 0,0019     | 0,0046           | 0,0708      |
| 4      | SULAWESI UTARA      | KOTA MANADO         | 0,0062         | 0,0036              | 0,0102           | 0,0200             | 0,0030                 | 0,0095             | 0,0116             | 0,0025     | 0,0266                   | 0,0041  | 0,0031            | 0,0032        | 0,0067     | 0,0171           | 0,0637      |
| 5      | JAWA TIMUR          | KOTA KEDIRI         | 0,0062         | 0,0036              | 0,0214           | 0,0312             | 0,0023                 | 0,0095             | 0,0116             | 0,0025     | 0,0259                   | 0,0012  | 0,0004            | 0,0012        | 0,0019     | 0,0047           | 0,0618      |
| 6      | SUMATERA UTARA      | KOTA SIBOLGA        | 0,0153         | 0,0080              | 0,0102           | 0,0335             | 0,0023                 | 0,0095             | 0,0048             | 0,0049     | 0,0215                   | 0,0012  | 0,0009            | 0,0012        | 0,0019     | 0,0052           | 0,0602      |
| 7      | JAWA BARAT          | KOTA CIREBON        | 0,0062         | 0,0080              | 0,0214           | 0,0356             | 0,0030                 | 0,0024             | 0,0116             | 0,0012     | 0,0182                   | 0,0012  | 0,0009            | 0,0012        | 0,0019     | 0,0052           | 0,0590      |
| 8      | NUSA TENGGARA TIMUR | KOTA KUPANG         | 0,0153         | 0,0036              | 0,0102           | 0,0291             | 0,0023                 | 0,0095             | 0,0048             | 0,0025     | 0,0191                   | 0,0012  | 0,0009            | 0,0012        | 0,0019     | 0,0052           | 0,0534      |
| 9      | JAWA TIMUR          | KOTA MOJOKERTO      | 0,0034         | 0,0021              | 0,0102           | 0,0157             | 0,0023                 | 0,0095             | 0,0116             | 0,0025     | 0,0259                   | 0,0012  | 0,0009            | 0,0020        | 0,0040     | 0,0081           | 0,0497      |
| 10     | SULAWESI SELATAN    | KOTA PARE-PARE      | 0,0062         | 0,0080              | 0,0102           | 0,0244             | 0,0023                 | 0,0011             | 0,0094             | 0,0049     | 0,0177                   | 0,0012  | 0,0009            | 0,0012        | 0,0040     | 0,0073           | 0,0494      |
| 11     | JAWA BARAT          | KOTA BOGOR          | 0,0062         | 0,0036              | 0,0214           | 0,0312             | 0,0037                 | 0,0024             | 0,0048             | 0,0003     | 0,0112                   | 0,0012  | 0,0018            | 0,0020        | 0,0019     | 0,0069           | 0,0493      |
| 12     | R I A U             | KOTA DUMAI          | 0,0062         | 0,0036              | 0,0101           | 0,0199             | 0,0023                 | 0,0095             | 0,0116             | 0,0005     | 0,0239                   | 0,0012  | 0,0004            | 0,0012        | 0,0019     | 0,0047           | 0,0485      |
| 13     | LAMPUNG             | KOTA BANDAR LAMPUNG | 0,0062         | 0,0021              | 0,0102           | 0,0185             | 0,0023                 | 0,0095             | 0,0116             | 0,0012     | 0,0246                   | 0,0006  | 0,0009            | 0,0012        | 0,0009     | 0,0036           | 0,0467      |
| 14     | SUMATERA BARAT      | KOTA PADANG         | 0,0062         | 0,0036              | 0,0102           | 0,0200             | 0,0023                 | 0,0024             | 0,0116             | 0,0025     | 0,0188                   | 0,0012  | 0,0009            | 0,0020        | 0,0019     | 0,0060           | 0,0448      |
| 15     | JAWA TENGAH         | KOTA TEGAL          | 0,0062         | 0,0036              | 0,0102           | 0,0200             | 0,0023                 | 0,0024             | 0,0094             | 0,0049     | 0,0190                   | 0,0012  | 0,0009            | 0,0012        | 0,0019     | 0,0052           | 0,0442      |
| 16     | JAWA TIMUR          | KOTA MADIUN         | 0,0062         | 0,0036              | 0,0214           | 0,0312             | 0,0023                 | 0,0024             | 0,0048             | 0,0005     | 0,0100                   | 0,0003  | 0,0002            | 0,0005        | 0,0005     | 0,0015           | 0,0427      |
| 17     | NUSA TENGGARA BARAT | KOTA MATARAM        | 0,0062         | 0,0036              | 0,0025           | 0,0123             | 0,0037                 | 0,0095             | 0,0116             | 0,0025     | 0,0273                   | 0,0006  | 0,0002            | 0,0012        | 0,0005     | 0,0025           | 0,0421      |
| 18     | JAWA TIMUR          | KOTA SURABAYA       | 0,0062         | 0,0021              | 0,0102           | 0,0185             | 0,0023                 | 0,0024             | 0,0116             | 0,0012     | 0,0175                   | 0,0012  | 0,0009            | 0,0020        | 0,0019     | 0,0060           | 0,0420      |
| 19     | BALI                | KOTA DENPASAR       | 0,0062         | 0,0036              | 0,0048           | 0,0146             | 0,0023                 | 0,0024             | 0,0116             | 0,0025     | 0,0188                   | 0,0012  | 0,0009            | 0,0020        | 0,0040     | 0,0081           | 0,0415      |
| 20     | JAWA BARAT          | KOTA BANDUNG        | 0,0062         | 0,0036              | 0,0102           | 0,0200             | 0,0023                 | 0,0024             | 0,0116             | 0,0005     | 0,0168                   | 0,0006  | 0,0004            | 0,0012        | 0,0009     | 0,0031           | 0,0399      |
| 21     | KALIMANTAN TIMUR    | KOTA SAMARINDA      | 0,0020         | 0,0012              | 0,0102           | 0,0134             | 0,0037                 | 0,0095             | 0,0094             | 0,0012     | 0,0238                   | 0,0003  | 0,0002            | 0,0012        | 0,0009     | 0,0026           | 0,0398      |
| 22     | SULAWESI TENGGARA   | KOTA KENDARI        | 0,0062         | 0,0036              | 0,0048           | 0,0146             | 0,0023                 | 0,0024             | 0,0116             | 0,0049     | 0,0212                   | 0,0006  | 0,0009            | 0,0012        | 0,0009     | 0,0036           | 0,0394      |

| NO.    | PROPINSI         | KOTA                  | SOSIAL POLITIK    |                        |                     |           |                           |                       |                       |            |                                |         |                      |                   |            | TOTAL<br>SCORE |           |
|--------|------------------|-----------------------|-------------------|------------------------|---------------------|-----------|---------------------------|-----------------------|-----------------------|------------|--------------------------------|---------|----------------------|-------------------|------------|----------------|-----------|
|        |                  |                       | Keamanan          |                        |                     |           | Sosial Politik            |                       |                       |            |                                | Budaya  |                      |                   |            |                |           |
|        |                  |                       | Gangguan<br>Usaha | Gangguan<br>Masyarakat | Kecepatan<br>Aparat | Sub Total | Partisipasi<br>Masyarakat | Konflik<br>Masyarakat | Stabilitas<br>Politik | Unjuk Rasa | Sub Total<br>Sosial<br>Politik | Terbuka | Non<br>Diskriminatif | Adat-<br>istiadat | Etos Kerja |                | Sub Total |
|        |                  |                       |                   |                        |                     |           |                           |                       |                       |            |                                |         |                      |                   |            |                |           |
| 0.0523 | 0.0311           | 0.0724                | Keamanan          | 0.012                  | 0.0184              | 0.0289    | 0.0095                    | Politik               | 0.0086                | 0.0064     | 0.0071                         | 0.0141  | Budaya               | 0.2608            |            |                |           |
| 23     | KALIMANTAN TIMUR | KOTA BALIKPAPAN       | 0,0020            | 0,0012                 | 0,0102              | 0,0134    | 0,0037                    | 0,0095                | 0,0094                | 0,0005     | 0,0231                         | 0,0003  | 0,0002               | 0,0012            | 0,0009     | 0,0026         | 0,0391    |
| 24     | SULAWESI UTARA   | KOTA BITUNG           | 0,0020            | 0,0012                 | 0,0102              | 0,0134    | 0,0037                    | 0,0095                | 0,0094                | 0,0005     | 0,0231                         | 0,0003  | 0,0002               | 0,0012            | 0,0009     | 0,0026         | 0,0391    |
| 25     | SUMATERA UTARA   | KOTA TANJUNG BALAI    | 0,0020            | 0,0012                 | 0,0102              | 0,0134    | 0,0037                    | 0,0095                | 0,0094                | 0,0005     | 0,0231                         | 0,0003  | 0,0002               | 0,0012            | 0,0009     | 0,0026         | 0,0391    |
| 26     | JAWA BARAT       | KOTA SUKABUMI         | 0,0020            | 0,0012                 | 0,0102              | 0,0134    | 0,0037                    | 0,0095                | 0,0094                | 0,0005     | 0,0231                         | 0,0003  | 0,0002               | 0,0012            | 0,0009     | 0,0026         | 0,0391    |
| 27     | SUMATERA UTARA   | KOTA TEBING TINGGI    | 0,0062            | 0,0036                 | 0,0102              | 0,0200    | 0,0037                    | 0,0007                | 0,0094                | 0,0005     | 0,0143                         | 0,0012  | 0,0004               | 0,0012            | 0,0019     | 0,0047         | 0,0390    |
| 28     | R I A U          | KOTA PEKAN BARU       | 0,0020            | 0,0012                 | 0,0048              | 0,0080    | 0,0030                    | 0,0095                | 0,0116                | 0,0025     | 0,0266                         | 0,0006  | 0,0004               | 0,0012            | 0,0019     | 0,0041         | 0,0387    |
| 29     | BANGKA BELITUNG  | KOTA PANGKAL PINANG   | 0,0062            | 0,0021                 | 0,0102              | 0,0185    | 0,0023                    | 0,0011                | 0,0094                | 0,0012     | 0,0140                         | 0,0012  | 0,0018               | 0,0005            | 0,0005     | 0,0040         | 0,0365    |
| 30     | DKI JAKARTA      | DKI JAKARTA           | 0,0034            | 0,0012                 | 0,0048              | 0,0094    | 0,0023                    | 0,0095                | 0,0116                | 0,0005     | 0,0239                         | 0,0006  | 0,0004               | 0,0003            | 0,0019     | 0,0032         | 0,0365    |
| 31     | JAWA TENGAH      | KOTA SEMARANG         | 0,0062            | 0,0036                 | 0,0025              | 0,0123    | 0,0023                    | 0,0048                | 0,0116                | 0,0012     | 0,0199                         | 0,0006  | 0,0009               | 0,0012            | 0,0009     | 0,0036         | 0,0358    |
| 32     | JAWA TIMUR       | KOTA MALANG           | 0,0062            | 0,0036                 | 0,0025              | 0,0123    | 0,0023                    | 0,0048                | 0,0116                | 0,0012     | 0,0199                         | 0,0012  | 0,0009               | 0,0003            | 0,0009     | 0,0033         | 0,0355    |
| 33     | D.I. YOGYAKARTA  | KOTA YOGYAKARTA       | 0,0020            | 0,0021                 | 0,0102              | 0,0143    | 0,0023                    | 0,0024                | 0,0116                | 0,0012     | 0,0175                         | 0,0006  | 0,0009               | 0,0012            | 0,0009     | 0,0036         | 0,0354    |
| 34     | SUMATERA UTARA   | KOTA BINJAI           | 0,0034            | 0,0021                 | 0,0102              | 0,0157    | 0,0037                    | 0,0095                | 0,0020                | 0,0012     | 0,0164                         | 0,0003  | 0,0004               | 0,0012            | 0,0009     | 0,0028         | 0,0349    |
| 35     | JAWA TENGAH      | KOTA SURAKARTA        | 0,0062            | 0,0036                 | 0,0048              | 0,0146    | 0,0023                    | 0,0024                | 0,0116                | 0,0012     | 0,0175                         | 0,0003  | 0,0002               | 0,0012            | 0,0009     | 0,0026         | 0,0347    |
| 36     | BENGKULU         | KOTA BENGKULU         | 0,0020            | 0,0021                 | 0,0102              | 0,0143    | 0,0023                    | 0,0024                | 0,0116                | 0,0012     | 0,0175                         | 0,0006  | 0,0009               | 0,0005            | 0,0005     | 0,0025         | 0,0343    |
| 37     | SUMATERA UTARA   | KOTA PEMATANG SIANTAR | 0,0062            | 0,0036                 | 0,0102              | 0,0200    | 0,0037                    | 0,0011                | 0,0020                | 0,0005     | 0,0073                         | 0,0025  | 0,0009               | 0,0012            | 0,0019     | 0,0065         | 0,0338    |
| 38     | SUMATERA UTARA   | KOTA MEDAN            | 0,0034            | 0,0021                 | 0,0102              | 0,0157    | 0,0023                    | 0,0024                | 0,0094                | 0,0003     | 0,0144                         | 0,0012  | 0,0002               | 0,0012            | 0,0009     | 0,0035         | 0,0336    |
| 39     | BANTEN           | KOTA TANGERANG        | 0,0034            | 0,0021                 | 0,0102              | 0,0157    | 0,0030                    | 0,0024                | 0,0048                | 0,0012     | 0,0114                         | 0,0006  | 0,0009               | 0,0012            | 0,0009     | 0,0036         | 0,0307    |
| 40     | SUMATERA SELATAN | KOTA PALEMBANG        | 0,0020            | 0,0012                 | 0,0025              | 0,0057    | 0,0023                    | 0,0024                | 0,0116                | 0,0025     | 0,0188                         | 0,0012  | 0,0009               | 0,0020            | 0,0019     | 0,0060         | 0,0305    |
| 41     | JAWA TENGAH      | KOTA PEKALONGAN       | 0,0034            | 0,0021                 | 0,0048              | 0,0103    | 0,0023                    | 0,0011                | 0,0094                | 0,0003     | 0,0131                         | 0,0025  | 0,0009               | 0,0012            | 0,0019     | 0,0065         | 0,0299    |
| 42     | JAWA TIMUR       | KOTA PROBOLINGGO      | 0,0062            | 0,0036                 | 0,0048              | 0,0146    | 0,0037                    | 0,0011                | 0,0048                | 0,0012     | 0,0108                         | 0,0012  | 0,0009               | 0,0012            | 0,0009     | 0,0042         | 0,0296    |
| 43     | BANTEN           | KOTA CILEGON          | 0,0034            | 0,0021                 | 0,0102              | 0,0157    | 0,0023                    | 0,0011                | 0,0048                | 0,0025     | 0,0107                         | 0,0003  | 0,0002               | 0,0012            | 0,0005     | 0,0022         | 0,0286    |
| 44     | JAWA BARAT       | KOTA BEKASI           | 0,0034            | 0,0012                 | 0,0048              | 0,0094    | 0,0023                    | 0,0024                | 0,0048                | 0,0005     | 0,0100                         | 0,0003  | 0,0002               | 0,0012            | 0,0009     | 0,0026         | 0,0220    |

## Lampiran 4.6.2.3. Hasil Pembobotan (Score) Indikator, Variabel, Faktor Ekonomi Daerah 44 Kota di Indonesia

| NO. | PROPINSI          | KOTA                  | EKONOMI DAERAH    |        |        |                                 |                           |                             |                            |                                  | TOTAL<br>SCORE |
|-----|-------------------|-----------------------|-------------------|--------|--------|---------------------------------|---------------------------|-----------------------------|----------------------------|----------------------------------|----------------|
|     |                   |                       | Potensi Ekonomi   |        |        |                                 | Struktur Ekonomi          |                             |                            |                                  |                |
|     |                   |                       | PDRB<br>Perkapita | Tumbuh | IPM    | Sub Total<br>Potensi<br>Ekonomi | Nilai<br>Tambah<br>Primer | Nilai<br>Tambah<br>Sekunder | Nilai<br>Tambah<br>Tersier | Sub Total<br>Struktur<br>Ekonomi |                |
|     |                   |                       |                   |        |        |                                 |                           |                             |                            |                                  |                |
| 1   | JAWA BARAT        | KOTA CIREBON          | 0,0247            | 0,0222 | 0,0086 | 0,0555                          | 0,0009                    | 0,0069                      | 0,0043                     | 0,0121                           | 0,0676         |
| 2   | SULAWESI UTARA    | KOTA BITUNG           | 0,0247            | 0,0222 | 0,0079 | 0,0548                          | 0,0009                    | 0,0069                      | 0,0043                     | 0,0121                           | 0,0669         |
| 3   | KALIMANTAN TIMUR  | KOTA BALIKPAPAN       | 0,0247            | 0,0222 | 0,0086 | 0,0555                          | 0,0009                    | 0,0069                      | 0,0019                     | 0,0097                           | 0,0652         |
| 4   | R I A U           | KOTA BATAM            | 0,0247            | 0,0222 | 0,0086 | 0,0555                          | 0,0009                    | 0,0069                      | 0,0004                     | 0,0082                           | 0,0637         |
| 5   | JAWA TIMUR        | KOTA KEDIRI           | 0,0247            | 0,0222 | 0,0079 | 0,0548                          | 0,0009                    | 0,0069                      | 0,0004                     | 0,0082                           | 0,0630         |
| 6   | BANTEN            | KOTA CILEGON          | 0,0247            | 0,0222 | 0,0079 | 0,0548                          | 0,0009                    | 0,0069                      | 0,0004                     | 0,0082                           | 0,0630         |
| 7   | SUMATERA SELATAN  | KOTA PALEMBANG        | 0,0247            | 0,0133 | 0,0079 | 0,0459                          | 0,0009                    | 0,0069                      | 0,0043                     | 0,0121                           | 0,0580         |
| 8   | KALIMANTAN TIMUR  | KOTA SAMARINDA        | 0,0247            | 0,0133 | 0,0086 | 0,0466                          | 0,0009                    | 0,0043                      | 0,0048                     | 0,0100                           | 0,0566         |
| 9   | SUMATERA UTARA    | KOTA PEMATANG SIANTAR | 0,0247            | 0,0062 | 0,0086 | 0,0395                          | 0,0009                    | 0,0069                      | 0,0043                     | 0,0121                           | 0,0516         |
| 10  | SULAWESI TENGGARA | KOTA KENDARI          | 0,0126            | 0,0222 | 0,0079 | 0,0427                          | 0,0016                    | 0,0023                      | 0,0048                     | 0,0087                           | 0,0514         |
| 11  | R I A U           | KOTA PEKAN BARU       | 0,0126            | 0,0222 | 0,0086 | 0,0434                          | 0,0009                    | 0,0023                      | 0,0048                     | 0,0080                           | 0,0514         |
| 12  | JAWA TENGAH       | KOTA SEMARANG         | 0,0247            | 0,0062 | 0,0086 | 0,0395                          | 0,0009                    | 0,0043                      | 0,0048                     | 0,0100                           | 0,0495         |
| 13  | BANTEN            | KOTA TANGERANG        | 0,0247            | 0,0062 | 0,0086 | 0,0395                          | 0,0009                    | 0,0069                      | 0,0019                     | 0,0097                           | 0,0492         |
| 14  | SUMATERA UTARA    | KOTA SIBOLGA          | 0,0126            | 0,0222 | 0,0079 | 0,0427                          | 0,0016                    | 0,0023                      | 0,0019                     | 0,0058                           | 0,0485         |
| 15  | JAWA TIMUR        | KOTA MALANG           | 0,0247            | 0,0030 | 0,0079 | 0,0356                          | 0,0009                    | 0,0069                      | 0,0048                     | 0,0126                           | 0,0482         |
| 16  | SUMATERA BARAT    | KOTA PADANG           | 0,0247            | 0,0062 | 0,0086 | 0,0395                          | 0,0009                    | 0,0023                      | 0,0048                     | 0,0080                           | 0,0475         |
| 17  | BALI              | KOTA DENPASAR         | 0,0247            | 0,0062 | 0,0086 | 0,0395                          | 0,0009                    | 0,0023                      | 0,0048                     | 0,0080                           | 0,0475         |
| 18  | JAWA TIMUR        | KOTA SURABAYA         | 0,0247            | 0,0016 | 0,0086 | 0,0349                          | 0,0009                    | 0,0069                      | 0,0043                     | 0,0121                           | 0,0470         |
| 19  | LAMPUNG           | KOTA BANDAR LAMPUNG   | 0,0247            | 0,0030 | 0,0079 | 0,0356                          | 0,0009                    | 0,0043                      | 0,0048                     | 0,0100                           | 0,0456         |
| 20  | JAWA BARAT        | KOTA BANDUNG          | 0,0247            | 0,0016 | 0,0086 | 0,0349                          | 0,0009                    | 0,0043                      | 0,0048                     | 0,0100                           | 0,0449         |
| 21  | DKI JAKARTA       | DKI JAKARTA           | 0,0247            | 0,0016 | 0,0086 | 0,0349                          | 0,0009                    | 0,0043                      | 0,0048                     | 0,0100                           | 0,0449         |
| 22  | D.I. YOGYAKARTA   | KOTA YOGYAKARTA       | 0,0247            | 0,0030 | 0,0086 | 0,0363                          | 0,0009                    | 0,0023                      | 0,0048                     | 0,0080                           | 0,0443         |

| NO. | PROPINSI            | KOTA                | EKONOMI DAERAH    |        |        |                                 |                           |                             |                            |                                  | TOTAL<br>SCORE |
|-----|---------------------|---------------------|-------------------|--------|--------|---------------------------------|---------------------------|-----------------------------|----------------------------|----------------------------------|----------------|
|     |                     |                     | Potensi Ekonomi   |        |        |                                 | Struktur Ekonomi          |                             |                            |                                  |                |
|     |                     |                     | PDRB<br>Perkapita | Tumbuh | IPM    | Sub Total<br>Potensi<br>Ekonomi | Nilai<br>Tambah<br>Primer | Nilai<br>Tambah<br>Sekunder | Nilai<br>Tambah<br>Tersier | Sub Total<br>Struktur<br>Ekonomi |                |
|     |                     |                     |                   |        |        |                                 |                           |                             |                            |                                  | 0.0481         |
| 23  | SUMATERA BARAT      | KOTA SAWAH LUNTO    | 0,0247            | 0,0016 | 0,0079 | 0,0342                          | 0,0042                    | 0,0023                      | 0,0019                     | 0,0084                           | 0,0426         |
| 24  | NUSA TENGGARA BARAT | KOTA MATARAM        | 0,0247            | 0,0016 | 0,0051 | 0,0314                          | 0,0009                    | 0,0010                      | 0,0048                     | 0,0067                           | 0,0381         |
| 25  | JAWA BARAT          | KOTA BOGOR          | 0,0062            | 0,0133 | 0,0079 | 0,0274                          | 0,0009                    | 0,0043                      | 0,0048                     | 0,0100                           | 0,0374         |
| 26  | GORONTALO           | KOTA GORONTALO      | 0,0030            | 0,0222 | 0,0051 | 0,0303                          | 0,0000                    | 0,0010                      | 0,0048                     | 0,0058                           | 0,0361         |
| 27  | BANGKA BELITUNG     | KOTA PANGKAL PINANG | 0,0062            | 0,0133 | 0,0079 | 0,0274                          | 0,0016                    | 0,0023                      | 0,0048                     | 0,0087                           | 0,0361         |
| 28  | R I A U             | KOTA DUMAI          | 0,0062            | 0,0133 | 0,0079 | 0,0274                          | 0,0009                    | 0,0023                      | 0,0048                     | 0,0080                           | 0,0354         |
| 29  | JAWA TENGAH         | KOTA SURAKARTA      | 0,0126            | 0,0016 | 0,0086 | 0,0228                          | 0,0009                    | 0,0069                      | 0,0048                     | 0,0126                           | 0,0354         |
| 30  | JAWA BARAT          | KOTA BEKASI         | 0,0126            | 0,0016 | 0,0086 | 0,0228                          | 0,0009                    | 0,0069                      | 0,0019                     | 0,0097                           | 0,0325         |
| 31  | JAWA TIMUR          | KOTA MADIUN         | 0,0062            | 0,0062 | 0,0079 | 0,0203                          | 0,0009                    | 0,0069                      | 0,0043                     | 0,0121                           | 0,0324         |
| 32  | SUMATERA UTARA      | KOTA BINJAI         | 0,0062            | 0,0062 | 0,0079 | 0,0203                          | 0,0009                    | 0,0069                      | 0,0043                     | 0,0121                           | 0,0324         |
| 33  | SUMATERA UTARA      | KOTA MEDAN          | 0,0126            | 0,0030 | 0,0086 | 0,0242                          | 0,0009                    | 0,0023                      | 0,0048                     | 0,0080                           | 0,0322         |
| 34  | SUMATERA UTARA      | KOTA TEBING TINGGI  | 0,0126            | 0,0016 | 0,0079 | 0,0221                          | 0,0009                    | 0,0043                      | 0,0048                     | 0,0100                           | 0,0321         |
| 35  | SUMATERA UTARA      | KOTA TANJUNG BALAI  | 0,0126            | 0,0062 | 0,0051 | 0,0239                          | 0,0016                    | 0,0043                      | 0,0019                     | 0,0078                           | 0,0317         |
| 36  | JAWA TIMUR          | KOTA MOJOKERTO      | 0,0062            | 0,0062 | 0,0086 | 0,0210                          | 0,0009                    | 0,0023                      | 0,0048                     | 0,0080                           | 0,0290         |
| 37  | SULAWESI UTARA      | KOTA MANADO         | 0,0062            | 0,0062 | 0,0086 | 0,0210                          | 0,0009                    | 0,0023                      | 0,0048                     | 0,0080                           | 0,0290         |
| 38  | JAWA TIMUR          | KOTA PROBOLINGGO    | 0,0126            | 0,0030 | 0,0051 | 0,0207                          | 0,0009                    | 0,0023                      | 0,0048                     | 0,0080                           | 0,0287         |
| 39  | SULAWESI SELATAN    | KOTA PARE-PARE      | 0,0062            | 0,0062 | 0,0086 | 0,0210                          | 0,0009                    | 0,0010                      | 0,0048                     | 0,0067                           | 0,0277         |
| 40  | BENGKULU            | KOTA BENGKULU       | 0,0062            | 0,0062 | 0,0086 | 0,0210                          | 0,0009                    | 0,0010                      | 0,0048                     | 0,0067                           | 0,0277         |
| 41  | JAWA TENGAH         | KOTA TEGAL          | 0,0030            | 0,0062 | 0,0079 | 0,0171                          | 0,0009                    | 0,0023                      | 0,0043                     | 0,0075                           | 0,0246         |
| 42  | JAWA TENGAH         | KOTA PEKALONGAN     | 0,0030            | 0,0030 | 0,0051 | 0,0111                          | 0,0042                    | 0,0043                      | 0,0043                     | 0,0128                           | 0,0239         |
| 43  | JAWA BARAT          | KOTA SUKABUMI       | 0,0062            | 0,0016 | 0,0079 | 0,0157                          | 0,0009                    | 0,0010                      | 0,0048                     | 0,0067                           | 0,0224         |
| 44  | NUSA TENGGARA TIMUR | KOTA KUPANG         | 0,0030            | 0,0016 | 0,0079 | 0,0125                          | 0,0009                    | 0,0023                      | 0,0048                     | 0,0080                           | 0,0205         |

**Lampiran 4.6.2.4. Hasil Pembobotan (Score) Indikator, Variabel, Faktor Tenaga Kerja & Produktivitas 44 Kota di Indonesia**

| NO. | PROPINSI          | KOTA                | TENAGA KERJA & PRODUKTIVITAS |        |               |                                     |                    |                 |                              |                | TOTAL SCORE |
|-----|-------------------|---------------------|------------------------------|--------|---------------|-------------------------------------|--------------------|-----------------|------------------------------|----------------|-------------|
|     |                   |                     | Ketersediaan Tenaga Kerja    |        |               |                                     | Biaya Tenaga Kerja |                 |                              |                |             |
|     |                   |                     | Usia Produktif               | SLTP   | Pencari Kerja | Sub Total Ketersediaan Tenaga Kerja | UMP/ IHK           | Upah Aktual/IHK | Sub Total Biaya Tenaga Kerja | Produk-tivitas |             |
|     |                   |                     |                              |        |               |                                     |                    |                 |                              |                |             |
| 1   | JAWA TIMUR        | KOTA KEDIRI         | 0,0034                       | 0,0032 | 0,0068        | 0,0134                              | 0,0060             | 0,0088          | 0,0148                       | 0,0273         | 0,0555      |
| 2   | JAWA BARAT        | KOTA CIREBON        | 0,0019                       | 0,0032 | 0,0113        | 0,0164                              | 0,0029             | 0,0088          | 0,0117                       | 0,0273         | 0,0554      |
| 3   | SUMATERA SELATAN  | KOTA PALEMBANG      | 0,0025                       | 0,0032 | 0,0113        | 0,0170                              | 0,0060             | 0,0014          | 0,0074                       | 0,0273         | 0,0517      |
| 4   | KALIMANTAN TIMUR  | KOTA BALIKPAPAN     | 0,0025                       | 0,0032 | 0,0113        | 0,0170                              | 0,0015             | 0,0014          | 0,0029                       | 0,0273         | 0,0472      |
| 5   | BANTEN            | KOTA CILEGON        | 0,0019                       | 0,0025 | 0,0113        | 0,0157                              | 0,0015             | 0,0020          | 0,0035                       | 0,0273         | 0,0465      |
| 6   | R I A U           | KOTA BATAM          | 0,0025                       | 0,0032 | 0,0015        | 0,0072                              | 0,0015             | 0,0088          | 0,0103                       | 0,0273         | 0,0448      |
| 7   | LAMPUNG           | KOTA BANDAR LAMPUNG | 0,0019                       | 0,0032 | 0,0113        | 0,0164                              | 0,0018             | 0,0088          | 0,0106                       | 0,0140         | 0,0410      |
| 8   | SUMATERA UTARA    | KOTA TANJUNG BALAI  | 0,0006                       | 0,0032 | 0,0113        | 0,0151                              | 0,0015             | 0,0088          | 0,0103                       | 0,0140         | 0,0394      |
| 9   | SULAWESI TENGGARA | KOTA KENDARI        | 0,0025                       | 0,0032 | 0,0113        | 0,0170                              | 0,0060             | 0,0088          | 0,0148                       | 0,0028         | 0,0346      |
| 10  | JAWA TIMUR        | KOTA PROBOLINGGO    | 0,0025                       | 0,0027 | 0,0068        | 0,0120                              | 0,0060             | 0,0021          | 0,0081                       | 0,0140         | 0,0341      |
| 11  | JAWA TIMUR        | KOTA SURABAYA       | 0,0034                       | 0,0032 | 0,0031        | 0,0097                              | 0,0015             | 0,0088          | 0,0103                       | 0,0140         | 0,0340      |
| 12  | GORONTALO         | KOTA GORONTALO      | 0,0019                       | 0,0025 | 0,0113        | 0,0157                              | 0,0060             | 0,0088          | 0,0148                       | 0,0028         | 0,0333      |
| 13  | SUMATERA UTARA    | KOTA BINJAI         | 0,0025                       | 0,0025 | 0,0031        | 0,0081                              | 0,0015             | 0,0088          | 0,0103                       | 0,0140         | 0,0324      |
| 14  | SUMATERA BARAT    | KOTA PADANG         | 0,0025                       | 0,0032 | 0,0113        | 0,0170                              | 0,0060             | 0,0020          | 0,0080                       | 0,0066         | 0,0316      |
| 15  | JAWA TENGAH       | KOTA SEMARANG       | 0,0034                       | 0,0032 | 0,0068        | 0,0134                              | 0,0060             | 0,0088          | 0,0148                       | 0,0028         | 0,0310      |
| 16  | D.I. YOGYAKARTA   | KOTA YOGYAKARTA     | 0,0034                       | 0,0032 | 0,0031        | 0,0097                              | 0,0029             | 0,0088          | 0,0117                       | 0,0066         | 0,0280      |
| 17  | SULAWESI UTARA    | KOTA BITUNG         | 0,0025                       | 0,0032 | 0,0113        | 0,0170                              | 0,0022             | 0,0014          | 0,0036                       | 0,0066         | 0,0272      |
| 18  | JAWA BARAT        | KOTA BANDUNG        | 0,0025                       | 0,0032 | 0,0113        | 0,0170                              | 0,0015             | 0,0020          | 0,0035                       | 0,0066         | 0,0271      |
| 19  | JAWA BARAT        | KOTA SUKABUMI       | 0,0025                       | 0,0032 | 0,0113        | 0,0170                              | 0,0060             | 0,0020          | 0,0080                       | 0,0019         | 0,0269      |
| 20  | JAWA TIMUR        | KOTA MADIUN         | 0,0025                       | 0,0032 | 0,0113        | 0,0170                              | 0,0018             | 0,0014          | 0,0032                       | 0,0066         | 0,0268      |
| 21  | SUMATERA BARAT    | KOTA SAWAH LUNTO    | 0,0019                       | 0,0027 | 0,0113        | 0,0159                              | 0,0060             | 0,0020          | 0,0080                       | 0,0028         | 0,0267      |
| 22  | SUMATERA UTARA    | KOTA MEDAN          | 0,0019                       | 0,0032 | 0,0113        | 0,0164                              | 0,0015             | 0,0020          | 0,0035                       | 0,0066         | 0,0265      |



| NO. | PROPINSI            | KOTA                  | TENAGA KERJA & PRODUKTIVITAS |        |                  |                                              |                    |                    |                                       |                    | TOTAL<br>SCORE |
|-----|---------------------|-----------------------|------------------------------|--------|------------------|----------------------------------------------|--------------------|--------------------|---------------------------------------|--------------------|----------------|
|     |                     |                       | Ketersediaan Tenaga Kerja    |        |                  |                                              | Biaya Tenaga Kerja |                    |                                       |                    |                |
|     |                     |                       | Usia<br>Produktif            | SLTP   | Pencari<br>Kerja | Sub Total<br>Ketersediaan<br>Tenaga<br>Kerja | UMP/<br>IHK        | Upah<br>Aktual/IHK | Sub Total<br>Biaya<br>Tenaga<br>Kerja | Produk-<br>tivitas |                |
|     |                     |                       |                              |        |                  |                                              |                    |                    |                                       |                    |                |
| 23  | SULAWESI SELATAN    | KOTA PARE-PARE        | 0,0015                       | 0,0032 | 0,0113           | 0,0160                                       | 0,0060             | 0,0014             | 0,0074                                | 0,0028             | 0,0262         |
| 24  | SUMATERA UTARA      | KOTA TEBING TINGGI    | 0,0019                       | 0,0027 | 0,0113           | 0,0159                                       | 0,0015             | 0,0020             | 0,0035                                | 0,0066             | 0,0260         |
| 25  | NUSA TENGGARA BARAT | KOTA MATARAM          | 0,0019                       | 0,0025 | 0,0068           | 0,0112                                       | 0,0029             | 0,0088             | 0,0117                                | 0,0028             | 0,0257         |
| 26  | BENGKULU            | KOTA BENGKULU         | 0,0019                       | 0,0032 | 0,0068           | 0,0119                                       | 0,0018             | 0,0088             | 0,0106                                | 0,0028             | 0,0253         |
| 27  | SUMATERA UTARA      | KOTA PEMATANG SIANTAR | 0,0019                       | 0,0032 | 0,0031           | 0,0082                                       | 0,0015             | 0,0088             | 0,0103                                | 0,0066             | 0,0251         |
| 28  | R I A U             | KOTA DUMAI            | 0,0019                       | 0,0027 | 0,0031           | 0,0077                                       | 0,0060             | 0,0088             | 0,0148                                | 0,0019             | 0,0244         |
| 29  | SULAWESI UTARA      | KOTA MANADO           | 0,0034                       | 0,0032 | 0,0113           | 0,0179                                       | 0,0022             | 0,0014             | 0,0036                                | 0,0028             | 0,0243         |
| 30  | JAWA TIMUR          | KOTA MOJOKERTO        | 0,0034                       | 0,0025 | 0,0113           | 0,0172                                       | 0,0022             | 0,0020             | 0,0042                                | 0,0019             | 0,0233         |
| 31  | JAWA BARAT          | KOTA BOGOR            | 0,0025                       | 0,0032 | 0,0113           | 0,0170                                       | 0,0015             | 0,0020             | 0,0035                                | 0,0028             | 0,0233         |
| 32  | DKI JAKARTA         | DKI JAKARTA           | 0,0034                       | 0,0032 | 0,0068           | 0,0134                                       | 0,0015             | 0,0014             | 0,0029                                | 0,0066             | 0,0229         |
| 33  | JAWA TENGAH         | KOTA PEKALONGAN       | 0,0019                       | 0,0027 | 0,0031           | 0,0077                                       | 0,0029             | 0,0088             | 0,0117                                | 0,0028             | 0,0222         |
| 34  | R I A U             | KOTA PEKAN BARU       | 0,0019                       | 0,0032 | 0,0068           | 0,0119                                       | 0,0060             | 0,0014             | 0,0074                                | 0,0028             | 0,0221         |
| 35  | BANGKA BELITUNG     | KOTA PANGKAL PINANG   | 0,0025                       | 0,0025 | 0,0031           | 0,0081                                       | 0,0060             | 0,0014             | 0,0074                                | 0,0066             | 0,0221         |
| 36  | KALIMANTAN TIMUR    | KOTA SAMARINDA        | 0,0025                       | 0,0032 | 0,0068           | 0,0125                                       | 0,0015             | 0,0014             | 0,0029                                | 0,0066             | 0,0220         |
| 37  | BALI                | KOTA DENPASAR         | 0,0034                       | 0,0032 | 0,0031           | 0,0097                                       | 0,0060             | 0,0014             | 0,0074                                | 0,0028             | 0,0199         |
| 38  | JAWA TIMUR          | KOTA MALANG           | 0,0034                       | 0,0032 | 0,0031           | 0,0097                                       | 0,0022             | 0,0014             | 0,0036                                | 0,0066             | 0,0199         |
| 39  | JAWA TENGAH         | KOTA TEGAL            | 0,0019                       | 0,0027 | 0,0031           | 0,0077                                       | 0,0029             | 0,0020             | 0,0049                                | 0,0066             | 0,0192         |
| 40  | BANTEN              | KOTA TANGERANG        | 0,0025                       | 0,0032 | 0,0031           | 0,0088                                       | 0,0015             | 0,0020             | 0,0035                                | 0,0066             | 0,0189         |
| 41  | JAWA BARAT          | KOTA BEKASI           | 0,0025                       | 0,0032 | 0,0031           | 0,0088                                       | 0,0015             | 0,0014             | 0,0029                                | 0,0066             | 0,0183         |
| 42  | NUSA TENGGARA TIMUR | KOTA KUPANG           | 0,0015                       | 0,0032 | 0,0068           | 0,0115                                       | 0,0018             | 0,0020             | 0,0038                                | 0,0019             | 0,0172         |
| 43  | SUMATERA UTARA      | KOTA SIBOLGA          | 0,0006                       | 0,0027 | 0,0031           | 0,0064                                       | 0,0015             | 0,0014             | 0,0029                                | 0,0066             | 0,0159         |
| 44  | JAWA TENGAH         | KOTA SURAKARTA        | 0,0019                       | 0,0025 | 0,0031           | 0,0075                                       | 0,0029             | 0,0020             | 0,0049                                | 0,0028             | 0,0152         |

### Lampiran 4.6.1.5. Hasil Pembobotan (Score) Indikator, Variabel, Faktor Infrastruktur Fisik 44 Kota di Indonesia

| NO. | PROPINSI            | KOTA                  | INFRASTRUKTUR FISIK              |                |                 |         |         |                                            |                              |                |                 |         |         |                                       | TOTAL SCORE |
|-----|---------------------|-----------------------|----------------------------------|----------------|-----------------|---------|---------|--------------------------------------------|------------------------------|----------------|-----------------|---------|---------|---------------------------------------|-------------|
|     |                     |                       | Ketersediaan Infrastruktur Fisik |                |                 |         |         |                                            | Kualitas Infrastruktur Fisik |                |                 |         |         |                                       |             |
|     |                     |                       | Jalan                            | Pelabuhan Laut | Pelabuhan Udara | Telepon | Listrik | Sub Total Keter-sediaan Infra-<br>struktur | Jalan                        | Pelabuhan Laut | Pelabuhan Udara | Telepon | Listrik | Sub Total Kualitas Infra-<br>struktur |             |
|     |                     |                       |                                  |                |                 |         |         |                                            |                              |                |                 |         |         |                                       |             |
| 1   | KALIMANTAN TIMUR    | KOTA SAMARINDA        | 0,0009                           | 0,0033         | 0,0017          | 0,0005  | 0,0007  | 0,0071                                     | 0,0018                       | 0,0014         | 0,0015          | 0,0008  | 0,0022  | 0,0077                                | 0,0148      |
| 2   | BENGKULU            | KOTA BENGKULU         | 0,0018                           | 0,0033         | 0,0017          | 0,0031  | 0,0007  | 0,0106                                     | 0,0035                       | 0,0006         | 0,0015          | 0,0016  | 0,0004  | 0,0076                                | 0,0182      |
| 3   | SUMATERA UTARA      | KOTA TANJUNG BALAI    | 0,0018                           | 0,0033         | 0,0017          | 0,0031  | 0,0011  | 0,0110                                     | 0,0003                       | 0,0014         | 0,0015          | 0,0033  | 0,0022  | 0,0087                                | 0,0197      |
| 4   | BANGKA BELITUNG     | KOTA PANGKAL PINANG   | 0,0018                           | 0,0051         | 0,0017          | 0,0005  | 0,0011  | 0,0102                                     | 0,0035                       | 0,0031         | 0,0022          | 0,0008  | 0,0004  | 0,0100                                | 0,0202      |
| 5   | SULAWESI TENGGARA   | KOTA KENDARI          | 0,0018                           | 0,0038         | 0,0017          | 0,0031  | 0,0007  | 0,0111                                     | 0,0003                       | 0,0031         | 0,0022          | 0,0033  | 0,0008  | 0,0097                                | 0,0208      |
| 6   | SULAWESI UTARA      | KOTA BITUNG           | 0,0018                           | 0,0033         | 0,0017          | 0,0031  | 0,0011  | 0,0110                                     | 0,0018                       | 0,0014         | 0,0015          | 0,0033  | 0,0022  | 0,0102                                | 0,0212      |
| 7   | SUMATERA SELATAN    | KOTA PALEMBANG        | 0,0018                           | 0,0033         | 0,0017          | 0,0031  | 0,0011  | 0,0110                                     | 0,0035                       | 0,0031         | 0,0026          | 0,0016  | 0,0004  | 0,0112                                | 0,0222      |
| 8   | SUMATERA UTARA      | KOTA BINJAI           | 0,0018                           | 0,0033         | 0,0017          | 0,0031  | 0,0029  | 0,0128                                     | 0,0003                       | 0,0014         | 0,0022          | 0,0033  | 0,0022  | 0,0094                                | 0,0222      |
| 9   | GORONTALO           | KOTA GORONTALO        | 0,0005                           | 0,0038         | 0,0017          | 0,0031  | 0,0011  | 0,0102                                     | 0,0035                       | 0,0014         | 0,0022          | 0,0033  | 0,0022  | 0,0126                                | 0,0228      |
| 10  | NUSA TENGGARA BARAT | KOTA MATARAM          | 0,0018                           | 0,0038         | 0,0017          | 0,0031  | 0,0007  | 0,0111                                     | 0,0035                       | 0,0031         | 0,0022          | 0,0033  | 0,0004  | 0,0125                                | 0,0236      |
| 11  | R I A U             | KOTA PEKAN BARU       | 0,0018                           | 0,0033         | 0,0017          | 0,0031  | 0,0029  | 0,0128                                     | 0,0018                       | 0,0014         | 0,0026          | 0,0033  | 0,0022  | 0,0113                                | 0,0241      |
| 12  | JAWA BARAT          | KOTA SUKABUMI         | 0,0040                           | 0,0033         | 0,0017          | 0,0031  | 0,0011  | 0,0132                                     | 0,0035                       | 0,0006         | 0,0015          | 0,0033  | 0,0022  | 0,0111                                | 0,0243      |
| 13  | SUMATERA BARAT      | KOTA SAWAH LUNTO      | 0,0018                           | 0,0033         | 0,0017          | 0,0031  | 0,0029  | 0,0128                                     | 0,0035                       | 0,0014         | 0,0015          | 0,0033  | 0,0022  | 0,0119                                | 0,0247      |
| 14  | R I A U             | KOTA DUMAI            | 0,0018                           | 0,0051         | 0,0017          | 0,0031  | 0,0029  | 0,0146                                     | 0,0006                       | 0,0035         | 0,0015          | 0,0033  | 0,0022  | 0,0111                                | 0,0257      |
| 15  | JAWA TENGAH         | KOTA PEKALONGAN       | 0,0066                           | 0,0033         | 0,0006          | 0,0031  | 0,0029  | 0,0165                                     | 0,0018                       | 0,0014         | 0,0007          | 0,0033  | 0,0022  | 0,0094                                | 0,0259      |
| 16  | SUMATERA UTARA      | KOTA PEMATANG SIANTAR | 0,0018                           | 0,0033         | 0,0017          | 0,0044  | 0,0029  | 0,0141                                     | 0,0035                       | 0,0014         | 0,0015          | 0,0033  | 0,0022  | 0,0119                                | 0,0260      |
| 17  | JAWA TIMUR          | KOTA MADIUN           | 0,0066                           | 0,0013         | 0,0017          | 0,0031  | 0,0029  | 0,0156                                     | 0,0035                       | 0,0014         | 0,0015          | 0,0033  | 0,0022  | 0,0119                                | 0,0275      |
| 18  | LAMPUNG             | KOTA BANDAR LAMPUNG   | 0,0018                           | 0,0051         | 0,0017          | 0,0044  | 0,0029  | 0,0159                                     | 0,0035                       | 0,0031         | 0,0022          | 0,0033  | 0,0008  | 0,0129                                | 0,0288      |
| 19  | KALIMANTAN TIMUR    | KOTA BALIKPAPAN       | 0,0066                           | 0,0038         | 0,0017          | 0,0031  | 0,0011  | 0,0163                                     | 0,0035                       | 0,0014         | 0,0022          | 0,0033  | 0,0022  | 0,0126                                | 0,0289      |
| 20  | SUMATERA UTARA      | KOTA TEBING TINGGI    | 0,0018                           | 0,0006         | 0,0003          | 0,0071  | 0,0057  | 0,0155                                     | 0,0035                       | 0,0003         | 0,0003          | 0,0074  | 0,0022  | 0,0137                                | 0,0292      |
| 21  | JAWA BARAT          | KOTA BEKASI           | 0,0040                           | 0,0033         | 0,0017          | 0,0044  | 0,0029  | 0,0163                                     | 0,0018                       | 0,0014         | 0,0022          | 0,0074  | 0,0022  | 0,0150                                | 0,0313      |
| 22  | D.I. YOGYAKARTA     | KOTA YOGYAKARTA       | 0,0066                           | 0,0033         | 0,0017          | 0,0044  | 0,0029  | 0,0189                                     | 0,0035                       | 0,0014         | 0,0022          | 0,0033  | 0,0022  | 0,0126                                | 0,0315      |

| NO.    | PROPINSI            | KOTA             | INFRASTRUKTUR FISIK              |                   |                    |         |         |                                                      |                              |                   |                    |         |         |                                             | TOTAL<br>SCORE |
|--------|---------------------|------------------|----------------------------------|-------------------|--------------------|---------|---------|------------------------------------------------------|------------------------------|-------------------|--------------------|---------|---------|---------------------------------------------|----------------|
|        |                     |                  | Ketersediaan Infrastruktur Fisik |                   |                    |         |         |                                                      | Kualitas Infrastruktur Fisik |                   |                    |         |         |                                             |                |
|        |                     |                  | Jalan                            | Pelabuhan<br>Laut | Pelabuhan<br>Udara | Telepon | Listrik | Sub Total<br>Keter-<br>sediaan<br>Infra-<br>struktur | Jalan                        | Pelabuhan<br>Laut | Pelabuhan<br>Udara | Telepon | Listrik | Sub Total<br>Kualitas<br>Infra-<br>struktur |                |
|        |                     |                  |                                  |                   |                    |         |         |                                                      |                              |                   |                    |         |         |                                             |                |
| 0.0138 | 0.0141              | 0.0058           | 0.016                            | 0.0175            |                    | 0.0095  | 0.0089  | 0.0073                                               | 0.204                        | 0.0139            |                    |         |         |                                             |                |
| 23     | SULAWESI UTARA      | KOTA MANADO      | 0,0018                           | 0,0051            | 0,0017             | 0,0044  | 0,0057  | 0,0187                                               | 0,0018                       | 0,0031            | 0,0026             | 0,0033  | 0,0022  | 0,0130                                      | 0,0317         |
| 24     | BANTEN              | KOTA TANGERANG   | 0,0066                           | 0,0033            | 0,0017             | 0,0044  | 0,0029  | 0,0189                                               | 0,0035                       | 0,0014            | 0,0026             | 0,0033  | 0,0022  | 0,0130                                      | 0,0319         |
| 25     | JAWA TENGAH         | KOTA TEGAL       | 0,0066                           | 0,0038            | 0,0006             | 0,0044  | 0,0057  | 0,0211                                               | 0,0035                       | 0,0014            | 0,0007             | 0,0033  | 0,0022  | 0,0111                                      | 0,0322         |
| 26     | SUMATERA UTARA      | KOTA SIBOLGA     | 0,0018                           | 0,0051            | 0,0017             | 0,0044  | 0,0029  | 0,0159                                               | 0,0018                       | 0,0035            | 0,0015             | 0,0074  | 0,0022  | 0,0164                                      | 0,0323         |
| 27     | JAWA BARAT          | KOTA CIREBON     | 0,0040                           | 0,0038            | 0,0017             | 0,0044  | 0,0057  | 0,0196                                               | 0,0018                       | 0,0014            | 0,0015             | 0,0033  | 0,0052  | 0,0132                                      | 0,0328         |
| 28     | JAWA BARAT          | KOTA BANDUNG     | 0,0040                           | 0,0033            | 0,0017             | 0,0044  | 0,0029  | 0,0163                                               | 0,0035                       | 0,0014            | 0,0022             | 0,0074  | 0,0022  | 0,0167                                      | 0,0330         |
| 29     | JAWA TIMUR          | KOTA MOJOKERTO   | 0,0040                           | 0,0013            | 0,0006             | 0,0044  | 0,0057  | 0,0160                                               | 0,0035                       | 0,0006            | 0,0007             | 0,0074  | 0,0052  | 0,0174                                      | 0,0334         |
| 30     | JAWA TIMUR          | KOTA KEDIRI      | 0,0040                           | 0,0033            | 0,0017             | 0,0044  | 0,0057  | 0,0191                                               | 0,0018                       | 0,0031            | 0,0015             | 0,0074  | 0,0022  | 0,0160                                      | 0,0351         |
| 31     | SUMATERA UTARA      | KOTA MEDAN       | 0,0018                           | 0,0051            | 0,0017             | 0,0044  | 0,0029  | 0,0159                                               | 0,0035                       | 0,0035            | 0,0026             | 0,0074  | 0,0022  | 0,0192                                      | 0,0351         |
| 32     | SULAWESI SELATAN    | KOTA PARE-PARE   | 0,0018                           | 0,0051            | 0,0017             | 0,0044  | 0,0029  | 0,0159                                               | 0,0035                       | 0,0035            | 0,0015             | 0,0074  | 0,0052  | 0,0211                                      | 0,0370         |
| 33     | NUSA TENGGARA TIMUR | KOTA KUPANG      | 0,0009                           | 0,0051            | 0,0017             | 0,0044  | 0,0029  | 0,0150                                               | 0,0035                       | 0,0035            | 0,0026             | 0,0074  | 0,0052  | 0,0222                                      | 0,0372         |
| 34     | BALI                | KOTA DENPASAR    | 0,0066                           | 0,0051            | 0,0017             | 0,0031  | 0,0057  | 0,0222                                               | 0,0035                       | 0,0035            | 0,0026             | 0,0033  | 0,0022  | 0,0151                                      | 0,0373         |
| 35     | JAWA TENGAH         | KOTA SURAKARTA   | 0,0066                           | 0,0033            | 0,0017             | 0,0044  | 0,0057  | 0,0217                                               | 0,0035                       | 0,0014            | 0,0026             | 0,0033  | 0,0052  | 0,0160                                      | 0,0377         |
| 36     | BANTEN              | KOTA CILEGON     | 0,0066                           | 0,0051            | 0,0017             | 0,0031  | 0,0029  | 0,0194                                               | 0,0035                       | 0,0035            | 0,0022             | 0,0074  | 0,0022  | 0,0188                                      | 0,0382         |
| 37     | SUMATERA BARAT      | KOTA PADANG      | 0,0018                           | 0,0038            | 0,0017             | 0,0071  | 0,0057  | 0,0201                                               | 0,0035                       | 0,0031            | 0,0026             | 0,0074  | 0,0022  | 0,0188                                      | 0,0389         |
| 38     | JAWA TENGAH         | KOTA SEMARANG    | 0,0066                           | 0,0038            | 0,0017             | 0,0044  | 0,0029  | 0,0194                                               | 0,0035                       | 0,0031            | 0,0026             | 0,0074  | 0,0052  | 0,0218                                      | 0,0412         |
| 39     | JAWA TIMUR          | KOTA MALANG      | 0,0066                           | 0,0033            | 0,0017             | 0,0044  | 0,0057  | 0,0217                                               | 0,0035                       | 0,0014            | 0,0022             | 0,0074  | 0,0052  | 0,0197                                      | 0,0414         |
| 40     | R I A U             | KOTA BATAM       | 0,0040                           | 0,0051            | 0,0017             | 0,0071  | 0,0057  | 0,0236                                               | 0,0018                       | 0,0035            | 0,0026             | 0,0074  | 0,0052  | 0,0205                                      | 0,0441         |
| 41     | JAWA TIMUR          | KOTA PROBOLINGGO | 0,0040                           | 0,0038            | 0,0017             | 0,0071  | 0,0070  | 0,0236                                               | 0,0035                       | 0,0031            | 0,0015             | 0,0074  | 0,0052  | 0,0207                                      | 0,0443         |
| 42     | JAWA BARAT          | KOTA BOGOR       | 0,0066                           | 0,0038            | 0,0017             | 0,0071  | 0,0057  | 0,0249                                               | 0,0018                       | 0,0031            | 0,0022             | 0,0074  | 0,0052  | 0,0197                                      | 0,0446         |
| 43     | JAWA TIMUR          | KOTA SURABAYA    | 0,0066                           | 0,0038            | 0,0017             | 0,0071  | 0,0070  | 0,0262                                               | 0,0035                       | 0,0035            | 0,0022             | 0,0074  | 0,0052  | 0,0218                                      | 0,0480         |
| 44     | DKI JAKARTA         | DKI JAKARTA      | 0,0066                           | 0,0038            | 0,0017             | 0,0071  | 0,0070  | 0,0262                                               | 0,0035                       | 0,0035            | 0,0026             | 0,0074  | 0,0052  | 0,0222                                      | 0,0484         |

Kajian produk hukum daerah (peraturan daerah, SK Kepala Daerah, dll), dilakukan dengan melihat tingkat kebermasalahan setiap produk hukum tersebut. Tingkat kebermasalahan produk hukum daerah dikelompokkan menjadi empat tingkat, sebagai berikut :

I. Tidak Bermasalah :

Tidak ditemukan adanya permasalahan sama sekali, atau kesalahan yang ditemukan tidak cukup signifikan, misalnya kesalahan pengetikan, redaksional, dan sebagainya. Dengan kesalahan seperti di atas dianggap tidak bermasalah, sepanjang kesalahan tersebut tidak menimbulkan pemasalah yuridis, substansial, dan prinsip.

II. Bermasalah Yuridis :

Merupakan permasalahan-permasalahan yang diakibatkan pelanggaran ketentuan yuridis yang sifatnya tidak substansial dan prinsip, seperti :

1. Relevansi Acuan Yuridis : apabila acuan yuridis yang digunakan sebagai dasar pertimbangan perda tidak relevan dengan apa yang diatur dalam perda yang bersangkutan. Sebagai contoh Perda yang mengatur tentang peternakan menggunakan UU, PP, yang mengatur tentang Pertambangan sebagai salah satu dasar konsiderannya, dan sebagainya.
2. Acuan Yuridis Tidak Up to date : apabila acuan yuridis yang digunakan oleh perda sudah tidak up to date lagi (sudah diganti/dirubah/tidak berlaku). Sebagai contoh Perda Pajak dan Retribusi yang ditetapkan pada tahun 2001, menggunakan konsideran yuridis UU No.18 Tahun 1997.
3. Kelengkapan Yuridis : secara material ada beberapa persyaratan sebagaimana diatur dalam UU No.34 Tahun 2000 dan PP No.65 dan

66 Tahun 2001. Seperti :

a. Perda Pajak Sekurang-kurangnya mengatur:

- 1) Nama, obyek, dan subyek pajak;
- 2) Dasar pengenaan, tarif, dan cara penghitungan pajak;
- 3) Wilayah pemungutan;
- 4) Masa pajak;
- 5) Penetapan;
- 6) Tata cara pembayaran dan penagihan;
- 7) Kadaluwarsa;
- 8) Sanksi administratif; dan
- 9) Tanggal mulai berlaku.

b. Perda Retribusi Sekurang-kurangnya mengatur mengenai :

- 1) Nama, obyek, dan subyek Retribusi;
- 2) Golongan retribusi; Cara mengukur tingkat penggunaan jasa yang bersangkutan;
- 3) Struktur dan besarnya tarif;
- 4) Wilayah pungutan;
- 5) Tata cara pemungutan;
- 6) Sanksi administratif;
- 7) Tata cara penagihan; dan
- 8) Tanggal berlaku.

Untuk Perda yang termasuk bermasalah YURIDIS rekomendasi yang diberikan adalah di "REVISI" / "DILENGKAPI", dengan disertai / disebutkan secara jelas usulan revisi atau bagian-bagian yang perlu direvisi. Misalnya : penghilangan atau penambahan pasal-pasal tertentu.

III. Bermasalah Subtansi :

Merupakan pelanggaran atas ketentuan-ketentuan substansial seperti ketidaksesuaian antara tujuan dan isi yang diatur, kejelasan obyek,

subyek, hak dan kewajiban para pihak, prosedur, standar pelayanan, filosofi pungutan, prinsip golongan, dan sebagainya, seperti berikut :

1. Diskoneksi antara Tujuan dan Isi : antara tujuan yang hendak dicapai, (yang termuat dalam bagian tujuan perda / pengaturan) tidak sesuai dengan materi yang diatur dalam pasal-pasal yang lainnya. Contoh : Perda yang dibuat dengan tujuan untuk perlindungan / pelestarian lingkungan hidup, ternyata dalam pasal-pasal yang lain semata-mata hanya mengatur tentang perdagangan / usaha usaha tertentu dan hanya untuk peningkatan PAD semata (kehutanan, limbah, dlsb) dan tidak ada pasal-pasal yang baik secara eksplisit maupun implisit mengatur sesuai dengan tujuan yang hendak dicapai.
2. Kejelasan obyek : obyek pungutan / perda tidak dideskripsikan secara jelas sehingga mengakibatkan *gray area* yang mengakibatkan multiinterpretatif.
3. Kejelasan Subyek : subyek pungutan / perda tidak dideskripsi secara jelas sehingga mengakibatkan *gray area* yang mengakibatkan multiinterpretatif.
4. Kejelasan Hak dan Kewajiban Wajib Pungut (Subyek dari Pemberlakuan Perda) maupun Pemerintah : Tidak dijelaskan / diatur (secara tegas) mengenai hak dan kewajiban wajib pungut (subyek yang dituju dari pemberlakuan perda) maupun hak dan kewajiban dari penda, sehingga mengakibatkan ketidak pastian hukum.
5. Kejelasan Prosedur dan Birokrasi (standar pelayanan) : perda tidak mengatur (tidak secara jelas) tentang prosedur dan birokrasi yang menyangkut standar pelayanan, seperti waktu pelayanan, persyaratan, biaya (struktur tarif), dan sebagainya.
6. Filosofi dan Prinsip Pungutan (Pajak, Retribusi, Golongan Retribusi, Sumbangan, dlsb) : Peraturan mengenai pungutan (pajak, retribusi) tidak sesuai dengan filosofi dasar atau prinsip dasar dari berbagai pungutan tersebut, seperti tidak adanya kontraprestasi secara langsung (tidak ada pelayanan / imbal balik jasa) dalam perda tentang retribusi. Demikian juga kesalahan dalam penetapan golongan retribusi, yang dapat mengakibatkan kesalahan secara teknis (misalnya penentuan dasar dan struktur

tarif) maupun substansi dari pungutan yang bersangkutan.

Untuk produk hukum yang termasuk dalam kategori bermasalah SUBSTANSI direkomendasikan untuk di "REVISI" atau "DITINJAU ULANG". Untuk produk hukum yang direkomendasikan untuk ditinjau ulang, perlu dilakukan investigasi lebih jauh tentang pasal-pasal krusial / bermasalah.

#### IV. Bermasalah Prinsip:

Bermasalah secara prinsip merupakan pelanggaran terhadap berbagai prinsip secara makro, seperti berdampak negatif terhadap perekonomian, bertentangan dengan kepentingan umum, aspek keadilan dan kemampuan masyarakat, pelanggaran kewenangan, dan lain-lain, yang dijabarkan sebagai berikut :

1. Prinsip Kesatuan Wilayah Ekonomi (free internal trade) : Perda melanggar Kesatuan Wilayah Ekonomi, yang memandang negara sebagai satu kesatuan ekonomi yang tidak terpisah-pisahkan, daerah dipandang sebagai bagian integral dalam kesatuan wilayah, sehingga perpindahan barang dan atau jasa / perdagangan dalam negeri (antar daerah) bebas dari hambatan baik tarif maupun non tarif. Pelanggaran atas prinsip ini mengakibatkan terancamnya keutuhan wilayah perekonomian nasional.
2. Prinsip Persaingan Usaha yang Sehat (monopoli, oligopoli, monopsoni, kemitraan wajib, dlsb) : Perda mengakibatkan berkurangnya / hilangnya akses dan kesempatan yang sama bagi tiap lapisan masyarakat untuk melakukan kegiatan usaha / terlibat dalam kegiatan usaha tertentu, dan menutup persaingan secara sehat dari masing-masing pihak karena adanya monopoli, oligopoli dll, atau adanya peraturan mengenai kemitraan wajib yang dapat mengakibatkan (bertendesi) peluang praktek KKN maupun mengakibatkan hubungan yang tidak seimbang, atau ketergantungan dari masing-masing pihak.
3. Berdampak Negatif terhadap Perekonomian : Peraturan dalam perda yang mengakibatkan adanya tambahan biaya (ekonomi biaya tinggi) bagi kalangan dunia usaha maupun masyarakat karena, struktur tarif yang tidak wajar, double taxation baik dengan peraturan perpajakan yang lebih tinggi (pusat) maupun tumpang tindih dengan peraturan lain yang sejajar, sehingga

menpungutan tersebut mengakibatkan terganggunya perekonomian (terhambatnya perkembangan usaha, bahkan mematikan perekonomian usaha, menghalangi kesempatan masyarakat untuk menabung dll).

- 4 Menghalangi / Mengurangi Kesempatan masyarakat untuk memperoleh akses (melanggar kepentingan umum) : Perda mengakibatkan terganggunya kehidupan / kepentingan umum masyarakat atau mengurangi kesempatan masyarakat untuk memperoleh akses terhadap berbagai sumber daya yang seharusnya dapat mereka peroleh, (ekonomi, politik, kebebasan beragama, dan sebagainya).
- 5 Pelanggaran Kewenangan Pemerintahan : Perda mengatur urusan pemerintahan diluar yang menjadi kewenangannya sebagai daerah otonom, atau merupakan kewenanga tingkat pemerintahan yang lebih tinggi atau di bawahnya.

Untuk produk hukum daerah yang melanggar baik satu atau lebih atas persoalan "PRINSIP" direkonendasikan untuk "DIBATALKAN".

## Lampiran 5.2 Contoh Kajian Peraturan Daerah

| No. | Produk Hukum Daerah                                                                                                                                | TINJAUAN                                                                                                                                                                                                                                                                                                                                                                                  |                                                                                                                                                                                                                                                                                                                                                                                                               |                                                                                                                                                                                                                                                                                                                                                                                                                                                                                                   | Rekomendasi | Keterangan                  |
|-----|----------------------------------------------------------------------------------------------------------------------------------------------------|-------------------------------------------------------------------------------------------------------------------------------------------------------------------------------------------------------------------------------------------------------------------------------------------------------------------------------------------------------------------------------------------|---------------------------------------------------------------------------------------------------------------------------------------------------------------------------------------------------------------------------------------------------------------------------------------------------------------------------------------------------------------------------------------------------------------|---------------------------------------------------------------------------------------------------------------------------------------------------------------------------------------------------------------------------------------------------------------------------------------------------------------------------------------------------------------------------------------------------------------------------------------------------------------------------------------------------|-------------|-----------------------------|
|     |                                                                                                                                                    | Bentuk/Obyek                                                                                                                                                                                                                                                                                                                                                                              | Harmonisasi dengan Produk Hukum yang Lebih Tinggi atau Produk Hukum lainnya                                                                                                                                                                                                                                                                                                                                   | Kepentingan Umum                                                                                                                                                                                                                                                                                                                                                                                                                                                                                  |             |                             |
|     | 1                                                                                                                                                  | 2                                                                                                                                                                                                                                                                                                                                                                                         | 3                                                                                                                                                                                                                                                                                                                                                                                                             | 4                                                                                                                                                                                                                                                                                                                                                                                                                                                                                                 | 5           | 6                           |
|     | Perda Kab. Mimika No. 32 Tahun 2002 tentang Retri ijin usaha perdagangan hewan, bahan asal hewan, pemotongan hewan, dan sarana produksi peternakan | <p>Obyek retribusi: setiap jenis ijin usaha yang dikeluarkan untuk setiap jenis usaha peternakan yang memperoleh ijin untuk melakukan usaha.</p> <p>Tingkat penggunaan jasa diukur berdasar jenis usaha peternakan.</p> <p>Besarnya retribusi:<br/>                     Ò Pemasokan hewan Rp 500.000/thn<br/>                     Ò Pemasokan bahan-bahan asal hewan Rp 300/thn, dst.</p> | <p>Perda ini tidak cukup jelas dalam menerangkan maksudnya. Misalnya, ia menyamakan saja ukuran penggunaan jasa dan tarif yang sama-sama berdasar jenis usaha.</p> <p>Ketidakjelasan yang lebih mendasar adalah penetapan besaran retribusi yang tidak menerangkan jumlah satuan yang dimaksud. Pemasokan hewan sebesar Rp 500.000/thn, misalnya, tidak cukup jelas apakah per ekor, atau per satuan apa?</p> | <p>Problem yang juga amat krusial adalah Perda ini memberlakukan kebijakan perijinan dan pungutan atas lalu lintas komoditas (ternak), sesuatu yang tidak tepat dalam konteks kesatuan ekonomi Indonesia dan prinsip perdagangan domestik yang bebas.</p> <p>Selain itu, pungutan ini tidak disertai pengaturan/ perincian tentang kontraprestasi apa yang akan diterima oleh wajib retribusi. Apakah ijin itu dalam bentuk pemeriksaan kesehatan ternak/ daging ternak yang masuk, atau apa?</p> | Dibatalkan  | Ditetapkan 6 September 2002 |

## Appendix 3 Research Data

### Appendix 3.1 List of Data, Type of Data, and Source of Data Used in Rating

| NO.                                                | FACTOR - VARIABLE - INDICATOR                                                            | TYPE OF DATA                          | SOURCE OF DATA                                                     |
|----------------------------------------------------|------------------------------------------------------------------------------------------|---------------------------------------|--------------------------------------------------------------------|
| <b>A. REGULATION AND GOVERNMENT SERVICE FACTOR</b> |                                                                                          |                                       |                                                                    |
| <b>1. Variable of Legal Certainty</b>              |                                                                                          |                                       |                                                                    |
| 1                                                  | Legal Consistency                                                                        | Primary Data                          | Perception of Business Community                                   |
| 2                                                  | Legal Enforcement                                                                        | Primary Data                          | Perception of Business Community                                   |
| 3                                                  | Extortion/Criminal Activity                                                              | Primary Data                          | Perception of Business Community                                   |
| 4                                                  | Executive - Legislative Relations                                                        | Primary Data                          | Perception of Business Community                                   |
| <b>2. Variable of Quality of Civil Service</b>     |                                                                                          |                                       |                                                                    |
| 5                                                  | Quality of Civil Service                                                                 | Primary Data                          | Perception of Business Community                                   |
| 6                                                  | Use of Authority                                                                         | Primary Data                          | Perception of Business Community                                   |
| <b>3. Variable of Regional Finance</b>             |                                                                                          |                                       |                                                                    |
| 7                                                  | Ratio of Retribution to Tax                                                              | Secondary Data                        | Regency/City Regional Budget Year 2002-2003                        |
| 8                                                  | Ratio of Development Budget to APBD                                                      | Secondary Data                        | Regency/City Regional Budget Year 2002-2003                        |
| <b>4. Variable of Regional Regulation</b>          |                                                                                          |                                       |                                                                    |
| 9                                                  | Legal Product of the Region<br>(Tax and Retribution)                                     | Analysis of<br>Regional<br>Regulation | Regency/City Regional Regulations,<br>Decisions of the Regents     |
| <b>B. SOCIO-POLITICAL FACTOR</b>                   |                                                                                          |                                       |                                                                    |
| <b>1. Variable of Security</b>                     |                                                                                          |                                       |                                                                    |
| 10                                                 | Business Security                                                                        | Primary Data                          | Perception of Business Community                                   |
| 11                                                 | Community Security                                                                       | Primary Data                          | Perception of Business Community                                   |
| 12                                                 | Quick Response of Security Officers<br>in Handling Security Issues                       | Primary Data                          | Perception of Business Community                                   |
| <b>2. Variable of Socio-Political Condition</b>    |                                                                                          |                                       |                                                                    |
| 13                                                 | Public Participation                                                                     | Primary Data                          | Perception of Business Community                                   |
| 14                                                 | Social Conflict                                                                          | Primary Data                          | Perception of Business Community                                   |
| 15                                                 | Political Stability                                                                      | Primary Data                          | Perception of Business Community                                   |
| 16                                                 | Intensity of Demonstration/Strike                                                        | Primary Data                          | Perception of Business Community                                   |
| <b>3. Variable of Socio-Cultural Condition</b>     |                                                                                          |                                       |                                                                    |
| 17                                                 | Community Openness toward Business Community                                             | Primary Data                          | Perception of Business Community                                   |
| 18                                                 | Absence of Non-Discriminatory Culture                                                    | Primary Data                          | Perception of Business Community                                   |
| 19                                                 | Custom & Tradition                                                                       | Primary Data                          | Perception of Business Community                                   |
| 20                                                 | Community's Working Ethos                                                                | Primary Data                          | Perception of Business Community                                   |
| <b>C. REGIONAL ECONOMIC DYNAMISM FACTOR</b>        |                                                                                          |                                       |                                                                    |
| <b>1. Variable of Economic Potential</b>           |                                                                                          |                                       |                                                                    |
| 21                                                 | GRDP Percapita                                                                           | Secondary Data                        | Regencies/Cities' GRDP per capita Year 2001                        |
| 22                                                 | Regional Economic Growth (HDI)                                                           | Secondary Data                        | Regencies/Cities' GRDP based on<br>Constant Price Year 1996 - 2001 |
| 23                                                 | Human Development Index                                                                  | Secondary Data                        | Regencies/Cities' HDI Year 2002                                    |
| <b>2. Variable of Economic Structure</b>           |                                                                                          |                                       |                                                                    |
| 24                                                 | Value Added per Sector                                                                   | Secondary Data                        | Regencies/Cities GRDP based on<br>Current Price Year 2001          |
| 25                                                 | Value Added of Secondary Sectors<br>Current Price Year 2001                              | Secondary Data                        | Regencies/Cities GRDP based on<br>Current Price Year 2001          |
| 26                                                 | Value Added of Tertiary Sectors                                                          | Secondary Data                        | Regencies/Cities GRDP based on<br>Current Price Year 2001          |
| <b>D. LABOR &amp; PRODUCTIVITY FACTOR</b>          |                                                                                          |                                       |                                                                    |
| <b>1. Variable of Manpower Availability</b>        |                                                                                          |                                       |                                                                    |
| 27                                                 | Ratio of Productive-Age Population<br>over Total Population                              | Secondary Data                        | Central Bureau of Statistics:<br>National Census Year 2002         |
| 28                                                 | Ration of Workers with Junior High School<br>Educational Background to Total Labor Force | Secondary Data                        | Central Bureau of Statistics:<br>National Census Year 2002         |
| 29                                                 | Ration of Job Seeker over Labor Force<br>National Census Year 2002                       | Secondary Data                        | Central Bureau of Statistics:                                      |



| NO.                                                        | FACTOR - VARIABLE - INDICATOR                                                                          | TYPE OF DATA                  | SOURCE OF DATA                                                                                                              |
|------------------------------------------------------------|--------------------------------------------------------------------------------------------------------|-------------------------------|-----------------------------------------------------------------------------------------------------------------------------|
| <b>2. Variable of Labor Cost</b>                           |                                                                                                        |                               |                                                                                                                             |
| 30                                                         | Normative Labor Wage                                                                                   | Secondary Data                | Ministry of Manpower and Transmigration:<br>List of Provincial/City Minimum Wage in Indonesia<br>Year 2003                  |
| 31                                                         | Actual Labor Wage                                                                                      | Secondary Data                | Central Bureau of Statistics:<br>National Census Year 2002                                                                  |
| <b>3. Variable of Labor Productivity and Quality</b>       |                                                                                                        |                               |                                                                                                                             |
| 32                                                         | Productivity (Ratio of Value Added of Manufacturing Sector over Total Workers in Manufacturing Sector) | Secondary Data                | Central and Regional Bureau of Statistics: GRDP<br>based on Constant Price Year 2001;<br>National Manpower Census Year 2002 |
| <b>E. PHYSICAL INFRASTRUCTURE FACTOR</b>                   |                                                                                                        |                               |                                                                                                                             |
| <b>1. Variable of Physical Infrastructure Availability</b> |                                                                                                        |                               |                                                                                                                             |
| 33                                                         | Availability of Road                                                                                   | Primary and<br>Secondary Data | Perception of Business Community;<br>Central/Regional Bureau of Statistics: Regencies/<br>Cities and Provinces in Figures   |
| 34                                                         | Availability of Sea Port                                                                               | Primary and<br>Secondary Data | Perception of Business Community;<br>Central/Regional Bureau of Statistics: Regencies/<br>Cities and Provinces in Figures   |
| 35                                                         | Availability of Airport                                                                                | Primary and<br>Secondary Data | Perception of Business Community;<br>Central/Regional Bureau of Statistics: Regencies/<br>Cities and Provinces in Figures   |
| 36                                                         | Availability of Telephone                                                                              | Primary and<br>Secondary Data | Perception of Business Community;<br>Central/Regional Bureau of Statistics: Regencies/<br>Cities and Provinces in Figures   |
| 37                                                         | Availability of Electricity                                                                            | Primary and<br>Secondary Data | Perception of Business Community;<br>Central/Regional Bureau of Statistics: Regencies/<br>Cities and Provinces in Figures   |
| <b>2. Variable of Infrastructure Quality</b>               |                                                                                                        |                               |                                                                                                                             |
| 38                                                         | Quality of Streets                                                                                     | Primary and<br>Secondary Data | Perception of Business Community;<br>Central/Regional Bureau of Statistics: Regencies/<br>Cities and Provinces in Figures   |
| 39                                                         | Sea Port Accessibility and Type                                                                        | Primary and<br>Secondary Data | Perception of Business Community;<br>Central/Regional Bureau of Statistics: Regencies/<br>Cities and Provinces in Figures   |
| 40                                                         | Airport Accessibility and Type                                                                         | Primary and<br>Secondary Data | Perception of Business Community;<br>Central/Regional Bureau of Statistics: Regencies/<br>Cities and Provinces in Figures   |
| 41                                                         | Quality of Telephone Service                                                                           | Primary and<br>Secondary Data | Perception of Business Community;<br>Central/Regional Bureau of Statistics: Regencies/<br>Cities and Provinces in Figures   |
| 42                                                         | Quality of Electricity Service                                                                         | Primary and<br>Secondary Data | Perception of Business Community;<br>Central/Regional Bureau of Statistics: Regencies/<br>Cities and Provinces in Figures   |

## Appendix 4 Factor, Variables, and Indicators, Rating Intensity

### Appendix 4.1 List of Factors - Variables - Indicators

| NO.                                                | FACTORS -<br>VARIABLE - INDICATORS                                                       | REMARK                                                                                                                                                                                                                                                                                                                                                                                                                                    | MEASUREMENT AND<br>DATA USED                   |
|----------------------------------------------------|------------------------------------------------------------------------------------------|-------------------------------------------------------------------------------------------------------------------------------------------------------------------------------------------------------------------------------------------------------------------------------------------------------------------------------------------------------------------------------------------------------------------------------------------|------------------------------------------------|
| <b>A. REGULATION AND GOVERNMENT SERVICE FACTOR</b> |                                                                                          |                                                                                                                                                                                                                                                                                                                                                                                                                                           |                                                |
| <b>1. Variable of Legal Certainty</b>              |                                                                                          |                                                                                                                                                                                                                                                                                                                                                                                                                                           |                                                |
| 1                                                  | Consistency                                                                              | Measures the certainty, clarity, and consistency in enforcement of regional regulations and other policies regulating business                                                                                                                                                                                                                                                                                                            | Perception of Business Community               |
| 2                                                  | Law Enforcement                                                                          | Measures legal certainty such as protection on work contract and ownership right, consistency of court decisions especially those related to business                                                                                                                                                                                                                                                                                     | Perception of Business Community               |
| 3                                                  | Extortion/Criminal Activity                                                              | Portrays regional government's settlement of illegal practice in levy conducted by people or group of people outside bureaucracy that disturbs business                                                                                                                                                                                                                                                                                   | Perception of Business Community               |
| 4                                                  | Executive - Legislative Relations                                                        | Captures problems caused by poor relations between DPRD and Regional Government                                                                                                                                                                                                                                                                                                                                                           | Perception of Business Community               |
| <b>2. Variable of Quality of Civil Service</b>     |                                                                                          |                                                                                                                                                                                                                                                                                                                                                                                                                                           |                                                |
| 5                                                  | Quality of Civil Service                                                                 | Measures the quality of government service and professionalism of government apparatus in providing service to business community                                                                                                                                                                                                                                                                                                         | Perception of Business Community               |
| 6                                                  | Use of Authority                                                                         | Measures the distortion of regional government apparatus in providing service to business community                                                                                                                                                                                                                                                                                                                                       | Perception of Business Community               |
| <b>3. Variable of Regional Finance</b>             |                                                                                          |                                                                                                                                                                                                                                                                                                                                                                                                                                           |                                                |
| 7                                                  | Structure of Levies Imposed by Regional Government to Business Community                 | Analyzes the structure of levies applicable in the region, especially regional tax and regional retribution                                                                                                                                                                                                                                                                                                                               | Ratio of Retribution to Tax in APBD            |
| 8                                                  | Regional Government's Commitment in Providing Supporting Facility for Business Community | Measures the commitment of regional government in developing physical infrastructure needed to support business activities manifested in fund allocation in development budget                                                                                                                                                                                                                                                            | Ratio of Development Budget to APBD            |
| <b>4. Variable of Regional Regulation</b>          |                                                                                          |                                                                                                                                                                                                                                                                                                                                                                                                                                           |                                                |
| 9                                                  | Legal Product of the Region (Tax and Retribution)                                        | Assesses the quality of policies/legal products made by regional government (regional regulations, Decision of Regent/Mayor, etc.) especially those related to business community. Several aspects are examined from those regulations such as juridical aspect, philosophy, substance, principles, and effects that might produce by said legal products. Regulations related to service, levy, pricing, labor, and so on are the focus. | Analysis on the Problem of Regional Regulation |
| <b>B. SOCIO-POLITICAL FACTOR</b>                   |                                                                                          |                                                                                                                                                                                                                                                                                                                                                                                                                                           |                                                |
| <b>1. Variable of Security</b>                     |                                                                                          |                                                                                                                                                                                                                                                                                                                                                                                                                                           |                                                |
| 10                                                 | Business Security                                                                        | Measures security disturbance to business community                                                                                                                                                                                                                                                                                                                                                                                       | Perception of Business Community               |
| 11                                                 | Community Security                                                                       | Measures sense of security and disturbance to community around business site                                                                                                                                                                                                                                                                                                                                                              | Perception of Business Community               |
| 12                                                 | Quick Response of Security Officers in Handling Security Issues                          | Measures the quality of security officers in handling security disturbance, and guarantee and protection provided by security officers in the region                                                                                                                                                                                                                                                                                      | Perception of Business Community               |
| <b>2. Variable of Socio-Political Condition</b>    |                                                                                          |                                                                                                                                                                                                                                                                                                                                                                                                                                           |                                                |
| 13                                                 | Public Participation                                                                     | Measures the openness of the bureaucracy for public participation or participation of business community in policy formulation especially those related to their concern. Measures public access in control of policy implementation                                                                                                                                                                                                      | Perception of Business Community               |
| 14                                                 | Social Conflict                                                                          | Measures the extent to which social conflict surrounding influences business activity                                                                                                                                                                                                                                                                                                                                                     | Perception of Business Community               |
| 15                                                 | Political Stability                                                                      | Measures the extent to which political conflict in the regions influences business activity                                                                                                                                                                                                                                                                                                                                               | Perception of Business Community               |

| NO.                                     | FACTORS -<br>VARIABLE - INDICATORS                                                      | REMARK                                                                                                                                                                                              | MEASUREMENT AND<br>DATA USED                                                                           |
|-----------------------------------------|-----------------------------------------------------------------------------------------|-----------------------------------------------------------------------------------------------------------------------------------------------------------------------------------------------------|--------------------------------------------------------------------------------------------------------|
| 16                                      | Intensity of Demonstration/Strike                                                       | Measures the extent to which demonstrations disturb business activity                                                                                                                               | Perception of Business Community                                                                       |
| 3. Variable of Socio-Cultural Condition |                                                                                         |                                                                                                                                                                                                     |                                                                                                        |
| 17                                      | Community Openness toward Business Community                                            | Measures the capacity of people in supporting business activity in terms of their openness to business community, investment and people from outside the region coming in to do business or to work | Perception of Business Community<br>Perception of Business Community                                   |
| 18                                      | Absence of Non-Discriminatory Culture                                                   | Measures the capacity of surrounding people in terms of their non-discriminatory attitude in relation to ethnic, religion, gender, race, etc.                                                       | Perception of Business Community                                                                       |
| 19                                      | Custom & Tradition                                                                      | Measures the society's values and customs in terms of their conduciveness and orientation to productivity                                                                                           | Perception of Business Community                                                                       |
| 20                                      | Community's Working Ethos                                                               | Measures the capacity of people, business community, and workers in the regions in terms of their working ethos and readiness to fair competition                                                   |                                                                                                        |
| C. REGIONAL ECONOMIC DYNAMISM FACTOR    |                                                                                         |                                                                                                                                                                                                     |                                                                                                        |
| 1. Variable of Economic Potential       |                                                                                         |                                                                                                                                                                                                     |                                                                                                        |
| 21                                      | GRDP Percapita                                                                          | Measures welfare in terms of average income of people                                                                                                                                               | Regency/City GRDP per Capita                                                                           |
| 22                                      | Regional Economic Growth                                                                | Measures regional economic potential in terms of their potential growth                                                                                                                             | Regency/City GRDP Growth Rate Year 1996-2001                                                           |
| 23                                      | Human Development Index (HDI)                                                           | Measures welfare and productivity, as well as quality of people's life in the region                                                                                                                | Human Development Index (HDI)                                                                          |
| 2. Variable of Economic Structure       |                                                                                         |                                                                                                                                                                                                     |                                                                                                        |
| 24                                      | Value Added of Primary Sectors                                                          | Measures the extent to which the regional economy is relying on natural resources                                                                                                                   | Value Added of Primary Sectors (Ratio of GRDP of Primary Sectors apart from Agriculture to Total GRDP) |
| 25                                      | Value Added of Secondary Sectors                                                        | Measures the extent to which people are accustomed with productive activity in manufacturing activities                                                                                             | Value Added of Secondary Sectors (Ratio of GRDP of Secondary Sectors to Total GRDP)                    |
| 26                                      | Value Added of Tertiary Sectors                                                         | Measures the capacity of financial institutions, trading and service in the region                                                                                                                  | Value Added of Tertiary Sectors (Ratio of GRDP of Tertiary Sectors to Total GRDP)                      |
| D. LABOR AND PRODUCTIVITY FACTOR        |                                                                                         |                                                                                                                                                                                                     |                                                                                                        |
| 1. Variable of Manpower Availability    |                                                                                         |                                                                                                                                                                                                     |                                                                                                        |
| 27                                      | Productive-Age Labor Availability                                                       | Measures the size of productive-age population of workers needed in business activities                                                                                                             | Ratio of Productive-Age Population over Total Population                                               |
| 28                                      | Availability of skilled Workers with at least Junior High School Educational Background | Measures the availability of workers having experience as workers in formal business organization                                                                                                   | Ratio of Workers of at least Junior High School to Total Labor Force                                   |
| 29                                      | Availability of Job Seeker                                                              | Measures the availability of job seekers to fill up jobs required in business activities                                                                                                            | Ratio of Job Seeker to Labor Force                                                                     |
| 2. Variable of Labor Cost               |                                                                                         |                                                                                                                                                                                                     |                                                                                                        |
| 30                                      | Normative Labor Wage                                                                    | Measures average level of compensation for all workers as regulated officially which is the cost that must be shouldered by businessmen                                                             | Provincial/City Minimum Wage                                                                           |
| 31                                      | Actual Labor Wage                                                                       | Measures labor cost based on sectors to be shouldered by businessmen                                                                                                                                | Actual Salary                                                                                          |
| 3. Variable of Labor Productivity       |                                                                                         |                                                                                                                                                                                                     |                                                                                                        |
| 32                                      | Labor Productivity                                                                      | Measures the productivity of workers in manufacturing sectors                                                                                                                                       | Ratio of Value Added of Manufacturing Sector to Total Workers in Manufacturing Sector                  |

| NO.                                               | FACTORS -<br>VARIABLE - INDICATORS | REMARK                                                                                                       | MEASUREMENT AND<br>DATA USED                                                                                |
|---------------------------------------------------|------------------------------------|--------------------------------------------------------------------------------------------------------------|-------------------------------------------------------------------------------------------------------------|
| <b>E. PHYSICAL INFRASTRUCTURE FACTOR</b>          |                                    |                                                                                                              |                                                                                                             |
| <b>1. Variable of Infrastructure Availability</b> |                                    |                                                                                                              |                                                                                                             |
| 33                                                | Availability of Road               | Measures the availability of infrastructure for land transportation                                          | Ratio of the Length of the Streets in the City/Regency over Region's area; Perception of Business Community |
| 34                                                | Availability of Sea Port           | Measures the availability of infrastructure for sea transportation                                           | Availability or Distance to Sea Port (Km); Perception of Business Community                                 |
| 35                                                | Availability of Airport            | Measures the availability of infrastructure for air transportation                                           | Availability or Distance to Airport (Km); Perception of Business Community                                  |
| 36                                                | Availability of Telephone          | Measures the availability of communication facility                                                          | Number of Telephone Lines per Capita; Perception of Business Community                                      |
| 37                                                | Availability of Electricity        | Measures the availability of electricity as source of power for business activity                            | Production of Electricity/KWH of Available Electricity ; Perception of Business Community                   |
| <b>2. Variable of Infrastructure Quality</b>      |                                    |                                                                                                              |                                                                                                             |
| 38                                                | Quality of Road                    | Measures the quality of physical infrastructure in the region as support for business activity               | Ratio of the Length of Road with Good Quality over Total Length of Road; Perception of Business Community   |
| 39                                                | Sea Port Accessibility and Type    | Measures access, smoothness, and capacity of sea transportation facilities as support for business activity  | Type and Capacity of Sea Port and Average Departure per Week; Perception of Business Community              |
| 40                                                | Airport Accessibility and Type     | Measures access and smoothness of air transportation facility in the region as support for business activity | Type of Airport and Average Flight per Week; Perception of Business Community                               |
| 41                                                | Quality of Telephone Service       | Measures the quality of communication facilities in the region                                               | Perception of Business Community; Regency/City and Province in Figures                                      |
| 42                                                | Quality of Electricity Service     | Measures the quality of energy sources as support for business activities                                    | Perception of Business Community; Regency/City and Province in Figures                                      |

## Appendix 4.2 Intensity Classification Method

Each indicator was given categories of intensity (Extremely High, High, Moderate, Low, Extremely Low and so forth) used to rate existing statistical data before it was processed using the 'expert choice' software based on the AHP method. The classification of indicator into levels of intensity was done following the method below:

### A. Intensity Classification System for Indicator

The factors determining the attractiveness of a region to investment was evaluated by, first, determining the categories of intensity of each indicator, for instance, High, Moderate, Low and Extremely Low. The classification of each indicator was determined using these two approaches: (1) A Method (Mean method) and (2) B Method (Distribution Method).

#### A Method

(Mean Method) is a method used to compare the value of each area against the mean value of the entire regions. The closer the value of an area in proportion to the mean weighed value of the entire areas, the closer the region is in relation to the average value of the entire regions in terms of such indicator. The more the regions showing this level of intensity closer to the average value the better the distribution of the regions.

#### B Method

(Distribution Method) is a mean method that takes into account the distribution of the data. The classification of the indicator using this method was adjusted based on the skewness and kurtosis of the curve of data distribution.

Basically, both methods employ certain reference value as a basis in the determination of the level of intensity of each indicator. For the positive indicators, the smaller the value of the indicator compared to the reference value, the lower the intensity of the indicator. Meanwhile, the bigger the value of the indicator compared to the reference value, the higher the intensity of said indicator.

### B. Reference Value

Each indicator has different reference value that depends on the method used:

In **A method**, for instance, the reference value is based on the mean value of indicator. For example, to classify the intensity of FDRB indicator per capita in one regency, reference value is calculated based on the mean value of FDRB per capita for the entire regencies/cities.

In **B method**, reference value is based on the mean value of indicator by paying attention to distribution and form of *standard deviation, kurtosis and skewness*.

### C. Rationale for Using Method

#### 1. A Method is used:

- If the value of the indicators (suppose the value of GDP per capita or value for GDP growth rate) in more regions is closer to the mean value, it means that the value among regions is evenly distributed.
- In normal distribution/condition, mean = median = mode.

#### 2. B Method is used if the values of an indicator used in the determination of regional attractiveness to investment are highly unevenly distributed. Part of the values of a concerned indicator is skewed to the left, some parts are to the right, while some others distributed around the normal distribution. Therefore, to classify the intensity of such an indicator, attention should be given to the skewness and kurtosis.

### D. Intensity Classification System for Various Kinds of B Method

In application, B method is developed into several forms namely B, B1, B2, B3 and B4. Intensity classification systems for each of B method are as follows:

**Table 1:**  
**Classification of Intensity for B Method**

| Intensity      | Interval of Value                                     |                                                       |
|----------------|-------------------------------------------------------|-------------------------------------------------------|
|                | Positive Indicator                                    | Negative Indicator                                    |
| Extremely High | $\delta \geq X + SD$                                  | $\delta \leq X - SD$                                  |
| High           | $X + \frac{1}{2} SD \leq \delta < X + SD$             | $X - \frac{1}{2} SD \leq \delta < X - SD$             |
| Moderate       | $X - \frac{1}{2} SD \leq \delta < X + \frac{1}{2} SD$ | $X - \frac{1}{2} SD < \delta \leq X + \frac{1}{2} SD$ |
| Low            | $X - \frac{1}{2} SD < \delta \leq X - SD$             | $X + \frac{1}{2} SD < \delta \leq X + SD$             |
| Extremely Low  | $\delta < X - SD$                                     | $\delta > X + SD$                                     |

**Note** :  $\delta$  = Indicator Value;  $\bar{X}$  = Mean; SD = Standard Deviation

**Table 2:**  
**Classification of Intensity for B1 Method**

| Intensity      | Interval of Value                                                       |                                                                         |
|----------------|-------------------------------------------------------------------------|-------------------------------------------------------------------------|
|                | Positive Indicator                                                      | Negative Indicator                                                      |
| Extremely High | $\delta \geq X + \alpha_4 SD$                                           | $\delta \leq X - \alpha_4 SD$                                           |
| High           | $X + \frac{1}{2} \alpha_4 SD \leq \delta < X + \alpha_4 SD$             | $X - \frac{1}{2} SD \leq \delta < X - \alpha_4 SD$                      |
| Moderate       | $X - \frac{1}{2} \alpha_4 SD \leq \delta < X + \frac{1}{2} \alpha_4 SD$ | $X - \frac{1}{2} \alpha_4 SD < \delta \leq X + \frac{1}{2} \alpha_4 SD$ |
| Low            | $X - \frac{1}{2} \alpha_4 SD < \delta \leq X - \alpha_4 SD$             | $X + \frac{1}{2} \alpha_4 SD < \delta \leq X + \alpha_4 SD$             |
| Extremely Low  | $\delta < X - \alpha_4 SD$                                              | $\delta > X + \alpha_4 SD$                                              |

**Note** :  $\delta$  = Indicator Value;  $\bar{X}$  = Mean;  $\alpha_4$  = Kurtosis; SD = Standard Deviation

**Table 3:**  
**Classification of Intensity for B2 Method**

| Intensity      | Interval of Value                                                       |                                                                         |
|----------------|-------------------------------------------------------------------------|-------------------------------------------------------------------------|
|                | Positive Indicator                                                      | Negative Indicator                                                      |
| Extremely High | $\delta \geq X + \alpha_3 SD$                                           | $\delta \leq X - \alpha_3 SD$                                           |
| High           | $X + \frac{1}{2} \alpha_3 SD \leq \delta < X + \alpha_3 SD$             | $X - \frac{1}{2} SD \leq \delta < X - \alpha_3 SD$                      |
| Moderate       | $X - \frac{1}{2} \alpha_3 SD \leq \delta < X + \frac{1}{2} \alpha_3 SD$ | $X - \frac{1}{2} \alpha_3 SD < \delta \leq X + \frac{1}{2} \alpha_3 SD$ |
| Low            | $X - \frac{1}{2} \alpha_3 SD < \delta \leq X - \alpha_3 SD$             | $X + \frac{1}{2} \alpha_3 SD < \delta \leq X + \alpha_3 SD$             |
| Extremely Low  | $\delta < X - \alpha_3 SD$                                              | $\delta > X + \alpha_3 SD$                                              |

**Note** :  $\delta$  = Indicator Value;  $\bar{X}$  = Mean;  $\alpha_3$  = Skewness; SD = Standard Deviation

**Table 4:**  
**Classification of Intensity for B3 Method**

| Intensity      | Interval of Value                                       |                                                         |
|----------------|---------------------------------------------------------|---------------------------------------------------------|
|                | Positive Indicator                                      | Negative Indicator                                      |
| Extremely High | $\delta \geq X + Met$                                   | $\delta \leq X - Met$                                   |
| High           | $X + \frac{1}{2} Met \leq \delta < X + Met$             | $X - \frac{1}{2} Met \leq \delta < X - Met$             |
| Moderate       | $X - \frac{1}{2} Met \leq \delta < X + \frac{1}{2} Met$ | $X - \frac{1}{2} Met < \delta \leq X + \frac{1}{2} Met$ |
| Low            | $X - \frac{1}{2} Met < \delta \leq X - Met$             | $X + \frac{1}{2} Met < \delta \leq X + Met$             |
| Extremely Low  | $\delta < X - Met$                                      | $\delta > X + Met$                                      |

**Note** :  $\delta$  = Indicator Value;  $\bar{X}$  = Mean; Met = ( $\alpha_4 * SD$ ) if  $\alpha_4 \leq 3$ , and Met = ( $\alpha_3 * SD$ ) if  $\alpha_4 > 3$ ,

**Table 5:**  
**Classification of Intensity for B4 Method**

| Intensity      | Interval of Value                                                     |                                                                       |
|----------------|-----------------------------------------------------------------------|-----------------------------------------------------------------------|
|                | Positive Indicator                                                    | Negative Indicator                                                    |
| Extremely High | $\delta \geq X + \text{Rat}$                                          | $\delta \leq X - \text{Rat}$                                          |
| High           | $X + \frac{1}{2} \text{Rat} \leq \delta < X + \text{Rat}$             | $X - \frac{1}{2} \text{Rat} \leq \delta < X - \text{Rat}$             |
| Moderate       | $X - \frac{1}{2} \text{Rat} \leq \delta < X + \frac{1}{2} \text{Rat}$ | $X - \frac{1}{2} \text{Rat} < \delta \leq X + \frac{1}{2} \text{Rat}$ |
| Low            | $X - \frac{1}{2} \text{Rat} < \delta \leq X - \text{Rat}$             | $X + \frac{1}{2} \text{Rat} < \delta \leq X + \text{Rat}$             |
| Extremely Low  | $\delta < X - \text{Rat}$                                             | $\delta > X + \text{Rat}$                                             |

**Note** :  $\delta$  = Indicator Value;  $\bar{X}$  = Mean; Met =  $((\alpha_3 + \alpha_4)/2 \text{ R SD})$

#### E. Formulas

1 Mean

$$\bar{x} = \frac{x_1 + x_2 + \dots + x_n}{n} \quad \bar{x} = \frac{\sum_{i=1}^n x_i}{n}$$

2 Standard Deviation

$$s^2 = \frac{\sum_{i=1}^n (x_i - \bar{x})^2}{n-1} \quad s = \sqrt{\frac{\sum_{i=1}^n (x_i - \bar{x})^2}{n-1}}$$

3 Kurtosis

$$\alpha_4 = \frac{\sum_{i=1}^n (x_i - \bar{x})^4}{S^4}$$

4 Skewness

$$\alpha_3 = \frac{\sum_{i=1}^n (x_i - \bar{x})^3}{S^3}$$

Rating indicators were determined and developed through study of literature, experts' choice, and KPPOD's research result in 2001. The result was conferred with several experts through panel judgement then producing the final indicators and their structure. Afterwards, the structure of indicators produced by experts through panel judgment as explained in part III.3.1.1. was then weighed (the level of the importance of each indicator) to measure the level of attractiveness of an area to investment, as presented in chart 4.4.

The hierarchy of factors, variables, and indicators in chart 4.4. illustrates the five significant factors determining the attractiveness of an area to investment and the weight assigned to each. The total weight of all factors (the first level in the hierarchy) must be 1 (one).

Likewise the total weight of all variables under the respective factor (the second level in the hierarchy) must be 1 (one).

The same process applies for the weight of indicators under one variable (the third level in the hierarchy) wherein the total weight is 1 (one).

The total weight for the intensity assigned to each indicator (the fourth level in the hierarchy) was likewise set at one.

Looking at the next level, below the intensity level (to make it simple, just call it the fifth level), we will find **intensity score (not intensity weight)** in the fifth level. For example, under **government service indicator** there is **KABSB** intensity (abbreviation of Regulation and Government Service - Apparatus - Bureaucracy - Excellent), with a score of **0.0248**. The total of the entire intensity score for each indicator from 42 (forty-two) indicators is 1 (one).

Using the above **government service indicator** as sample, the score of its intensity is calculated as follows:

- 1 The score **0.0248** is **KABSB** intensity score where "**Government Service**" indicator, which is valued '**excellent**', produces a score of 0.0248.

Meanwhile, when the indicator is valued '**extremely bad**' that is represented by **KABSJ** (abbreviation of Regulation and Government Service - Apparatus - Bureaucracy - Extremely Bad), it produce a score of **0.0016**.

- 2 The score **0.0248** is obtained by multiplying the weights for the following:

$$\text{intensity} \times \text{indicator} \times \text{variable} \times \text{factor} \\ 0.513 \times 0.673 \times 0.226 \times 0.318 = 0.0248$$

- 3 In Appendix 4.6.2.1. the score 0.0062 given to '**Government Service**' indicator for **Sawahlunto City** equivalent to '**fair**' rating under **KABSD** (which stands for Regulation and Government Service Factor - Apparatus - Bureaucracy - Fair), was obtained by multiplying the weights of the following:

$$\text{intensity} \times \text{indicator} \times \text{variable} \times \text{factor} \\ 0.126 \times 0.673 \times 0.226 \times 0.318 = 0.0062$$

(Note: the result was rounded off)

The same calculation was done for the intensity of other indicators to produce intensity score of each indicator.

The total cumulative intensity score of 42 (forty-two) indicators represents the total score, which is used in the comparison between one area to other areas to get the ranking of total score. An area that obtained the highest possible intensity score for all 42 (forty-two) indicators was given a total score of 1 (one).

Ranking per specific factor was done through calculation of the intensity score intended factor. For example, the ranking in terms of regulation and government service factor was conducted by comparing the cumulative score of indicators under the regulation and government service factor.



## Appendix 5.1 Guideline in Analyzing Regional Regulation

The regions' legal products (Regional Regulation, Decree of the Regent/Mayor, etc.) is analyzed by looking as its problem levels, classified into four categories:

### I. Non-Problematic

This category is given to those regional products showing no problem at all or not showing any significant problem such as typographical error, grammar, etc. Such incremental problems are just considered non-problematic so long as no juridical, substantial, and principle problems are found.

### II. Juridically-Problematic

This category is for those regional products showing problems related to the violation of juridical provisions, which are not substantial and principle in nature. The likely problems are as follows:

#### 1. Irrelevance of Juridical Reference

The juridical reference used in the consideration of regional regulation is not relevant with the substance regulated in such regulation. Regional Regulation for Animal Husbandry, for example, uses Law or Government Regulation on Mining as its reference.

#### 2. Out of Date Juridical Reference

The juridical reference used is out of date because it has been amended or no longer applicable. For example, a regional regulation on regional tax or regional retribution stipulated in 2001 still uses Law Number 18 Year 1997 as its juridical reference while it has been amended by a new one.

#### 3. Juridical Incompleteness

There are some requirements for a regional regulation on regional tax or regional retribution to be considered complete as regulated in Law Number 34 Year 2000 and Government Regulation Number 65 and 66 Year 2001 such as:

**a Regional Regulation on Regional Tax, at least, should regulate the following subjects:**

- 1) Name, object, and subject of tax;
- 2) Basis of imposition, tariff, and calculation method;
- 3) Area of collection;
- 4) Tax period;
- 5) Stipulation;
- 6) Payment and collection procedures;
- 7) Expiration;
- 8) Administrative sanction; and
- 9) Date of effective implementation.

#### **b Regional Regulation on retribution, at least, should regulate the following:**

- 1) Name, object, and subject of retribution;
- 2) Categorization, method in measuring service utility level;
- 3) Structure and amount of tariff;
- 4) Area of collection;
- 5) Collection procedure;
- 6) Administrative sanction;
- 7) Claim procedure; and
- 8) Date of effective implementation.

Regional regulations with juridical problems were recommended for REVISION or PERFECTION, specified with clear recommendation on what should be revised or perfected. For example, several articles may necessarily be removed or added.

### III. Substantially-Problematic

This category refers to the violation of substantial provisions such as discrepancy between the objective and the content, unclear definition of object and/or subject and/or rights and obligations of the parties involved, unclear procedures, unclear service standards, violation to the philosophy of user charges, categorization, and so on. Specified problems and their operational definitions are as follows:

**1. Discrepancy between the objective and the content**

Provisions provided in the succeeding articles are not consistent with the objective as defined in the previous article. For example, a regional regulation may be composed for the protection of the environment as stated in the article on the objective of the regulation but in most of the articles it simply regulates matters related to trading or tariff oriented to accumulation of Original Regional Revenue (PAD).

## 2. Unclear definition of object

A regional regulation does not provide any clear description on the object subjected to levy letting it as a gray area wherein multiple interpretations may be developed and violation on it may be triggered.

## 3. Unclear definition of subject

A regional regulation does not provide any clear description on the subject of levy letting it as a gray area wherein multiple interpretations may be developed and violation on it may be triggered

## 4. Unclear definition of the rights and obligations of both taxpayer or retribution payer and government:

Rights and obligations of the taxpayer or retribution payer and that of the government are not clearly defined, leading to law ambiguity.

## 5. Unclear procedures and service standards

A regional regulation does not provide any clear description on the procedures and service standards such as deadline, requirements, tariff, and so on.

## 6. Philosophy and principles of levy (tax, retribution, classification, contribution, etc.)

Regulation of levy (tax or retribution) is not compatible with the philosophy of such kind of levy. Regional regulation on retribution, for example, perhaps does not provide any provision on the direct benefit supposed to be enjoyed by retribution payer. A certain regional regulation on retribution may wrongly define the category it belongs, leading to wrong stipulation of tariff stipulation basis and structure).

observance on the separation of authority, and so on. The problems of this kind and their operational definitions are as follows:

### 1. Violation to the principle of Free Internal Trade

A regional regulation violates the principle of Free Internal Trade, considering a country as an integrated, indivisible economic unit wherein regions are simply integral part of it and wherein inter-regional flow of goods and services is free from any tariff and non-tariff barriers. Violation to this principle simply means threat to economic unity.

### 2. Violation to the principle of Fair Business Competition (monopoly, oligopoly, monopsony, mandatory partnership, etc.)

A regional regulation leads to the decreased or lost of access or opportunity of a certain group of people to a certain business due to the existence of unfair provisions, which are monopoly or oligopoly in nature. It may be in the form of mandatory partnership that is susceptible to corruption, collusion, and nepotism, and unfair to some parties.

### 3. Negative impact to the economy

A regional regulation causes high cost economy for the business community and the whole community because of unfair tariff, and double taxation (the same tax object has been imposed with tax through other regulations either in the national level or regional level). This imposition limits the development of the business and the opportunity of the people to save.

### 4. Violation of public interest

A regional regulation curb the opportunity for the people to have access on resources and conditions they are entitled to (in terms of economy, politics, religious freedom, etc.)

### 5. Violation of authority

A regional regulation regulates matters beyond or not under the level of authority of concerned regional government. It is the authority of a higher or lower level of the government.

The regional products with SUBSTANTIAL problems are recommended for REVISION or REVIEW. Problematic articles to be reviewed should be indicated.

The regional regulations with these PRINCIPLE problems shall be recommended for CANCELLATION.

## IV. Principally-Problematic

This category refers to the violation of principles agreed in the national level such as avoidance of a negative impact on the economy, respect to public interest, justice, high consideration to people's capability,
